# Supplementary material
Source: PubMed Central journal article supplement (PMC4019115)
Supplement: JVI.00468-14_zjv999098972so1.pdf [file JVI.00468-14_zjv999098972so1.pdf]

## **Supplementary information legends**

**Supplementary Figure 1.** Signaling pathways induced in poxvirus-infected primary human macrophages. Each heat map represents a modulated canonical pathway involved in innate immunity (Ingenuity Pathways Analysis software). Each column represents the genes up- (red) or down- (green) regulated ( $p < 0.05$ ) for each of the indicated poxvirus vectors.

**Supplementary Table 1.** Differentially regulated genes in macrophages infected with different poxvirus vectors. Comparison of gene expression profiling between MVA-, NYVAC-, WR-, CopV-, ANK- or NYBH-infected macrophages. Representative human genes specifically regulated by each vector according to predicted biological function. Probe name, systematic name, t gene symbol, gene name and x-fold change in transcription are indicated.

| <b>IFN signaling</b>                                                    | <b>MVA</b> | <b>NYVAC</b> | <b>WR</b> | <b>NYBH</b> | <b>CopV</b> | <b>ANK</b> |
|-------------------------------------------------------------------------|------------|--------------|-----------|-------------|-------------|------------|
| BCL2-antagonist/killer 1                                                |            |              |           |             |             |            |
| B-cell CLL/lymphoma 2                                                   |            |              |           |             |             |            |
| interferon-induced protein 35                                           |            |              |           |             |             |            |
| interferon-induced protein with tetratricopeptide repeats 1             |            |              |           |             |             |            |
| interferon-induced protein with tetratricopeptide repeats 3             |            |              |           |             |             |            |
| interferon induced transmembrane protein 1                              |            |              |           |             |             |            |
| interferon (alpha, beta and omega) receptor 1                           |            |              |           |             |             |            |
| interferon (alpha, beta and omega) receptor 2                           |            |              |           |             |             |            |
| interferon, beta 1, fibroblast                                          |            |              |           |             |             |            |
| interferon, gamma                                                       |            |              |           |             |             |            |
| interferon gamma receptor 1                                             |            |              |           |             |             |            |
| interferon gamma receptor 2 (interferon gamma transducer 1)             |            |              |           |             |             |            |
| interferon regulatory factor 1                                          |            |              |           |             |             |            |
| interferon regulatory factor 9                                          |            |              |           |             |             |            |
| influenza virus) resistance 1, interferon-inducible protein p78 (mouse) |            |              |           |             |             |            |
| 2'-5'-oligoadenylate synthetase 1, 40/46kDa                             |            |              |           |             |             |            |
| protein inhibitor of activated STAT, 1                                  |            |              |           |             |             |            |
| proteasome (prosome, macropain) subunit, beta type, 8                   |            |              |           |             |             |            |
| suppressor of cytokine signaling 1                                      |            |              |           |             |             |            |
| signal transducer and activator of transcription 1, 91kDa               |            |              |           |             |             |            |
| signal transducer and activator of transcription 2, 113kDa              |            |              |           |             |             |            |

|                                                                                     | MVA | NYVAC | WR | NYBH | CopV | ANK |
|-------------------------------------------------------------------------------------|-----|-------|----|------|------|-----|
| <b>Apoptosis signaling</b>                                                          |     |       |    |      |      |     |
| apoptotic chromatin condensation inducer 1                                          |     |       |    |      |      |     |
| apoptotic peptidase activating factor 1                                             |     |       |    |      |      |     |
| BCL2-associated agonist of cell death                                               |     |       |    |      |      |     |
| BCL2-antagonist/killer 1                                                            |     |       |    |      |      |     |
| B-cell CLL/lymphoma 2                                                               |     |       |    |      |      |     |
| BCL2-related protein A1                                                             |     |       |    |      |      |     |
| BCL2-like 1                                                                         |     |       |    |      |      |     |
| BCL2-like 10 (apoptosis facilitator)                                                |     |       |    |      |      |     |
| BCL2-like 11 (apoptosis facilitator)                                                |     |       |    |      |      |     |
| baculoviral IAP repeat containing 3                                                 |     |       |    |      |      |     |
| calpain 1, (mu/I) large subunit                                                     |     |       |    |      |      |     |
| calpain 2, (m/II) large subunit                                                     |     |       |    |      |      |     |
| calpain 5                                                                           |     |       |    |      |      |     |
| calpain 11                                                                          |     |       |    |      |      |     |
| calpain, small subunit 1                                                            |     |       |    |      |      |     |
| caspace recruitment domain family, member 10                                        |     |       |    |      |      |     |
| caspace recruitment domain family, member 11                                        |     |       |    |      |      |     |
| caspace 3, apoptosis-related cysteine peptidase                                     |     |       |    |      |      |     |
| caspace 7, apoptosis-related cysteine peptidase                                     |     |       |    |      |      |     |
| caspace 8, apoptosis-related cysteine peptidase                                     |     |       |    |      |      |     |
| caspace 10, apoptosis-related cysteine peptidase                                    |     |       |    |      |      |     |
| CD40 molecule, TNF receptor superfamily member 5                                    |     |       |    |      |      |     |
| CD40 ligand                                                                         |     |       |    |      |      |     |
| cyclin-dependent kinase 1                                                           |     |       |    |      |      |     |
| cytochrome c, somatic                                                               |     |       |    |      |      |     |
| diablo, IAP-binding mitochondrial protein                                           |     |       |    |      |      |     |
| Fas ligand (TNF superfamily, member 6)                                              |     |       |    |      |      |     |
| v-Ha-ras Harvey rat sarcoma viral oncogene homolog                                  |     |       |    |      |      |     |
| inhibitor of kappa light polypeptide gene enhancer in B-cells, kinase beta          |     |       |    |      |      |     |
| inhibitor of kappa light polypeptide gene enhancer in B-cells, kinase epsilon       |     |       |    |      |      |     |
| lamin A/C                                                                           |     |       |    |      |      |     |
| mitogen-activated protein kinase kinase 4                                           |     |       |    |      |      |     |
| mitogen-activated protein kinase kinase kinase 5                                    |     |       |    |      |      |     |
| mitogen-activated protein kinase kinase kinase kinase 4                             |     |       |    |      |      |     |
| mitogen-activated protein kinase 3                                                  |     |       |    |      |      |     |
| mitogen-activated protein kinase 8                                                  |     |       |    |      |      |     |
| myeloid cell leukemia sequence 1 (BCL2-related)                                     |     |       |    |      |      |     |
| NLR family, apoptosis inhibitory protein                                            |     |       |    |      |      |     |
| nuclear factor of kappa light polypeptide gene enhancer in B-cells inhibitor, alpha |     |       |    |      |      |     |
| nuclear factor of kappa light polypeptide gene enhancer in B-cells inhibitor, beta  |     |       |    |      |      |     |
| poly (ADP-ribose) polymerase 1                                                      |     |       |    |      |      |     |
| phospholipase C, gamma 1                                                            |     |       |    |      |      |     |
| phospholipase C, gamma 2 (phosphatidylinositol-specific)                            |     |       |    |      |      |     |
| protein kinase C, alpha                                                             |     |       |    |      |      |     |
| protein kinase C, epsilon                                                           |     |       |    |      |      |     |
| protein kinase C, theta                                                             |     |       |    |      |      |     |
| v-raf-1 murine leukemia viral oncogene homolog 1                                    |     |       |    |      |      |     |
| ribosomal protein S6 kinase, 90kDa, polypeptide 1                                   |     |       |    |      |      |     |
| related RAS viral (r-ras) oncogene homolog 2                                        |     |       |    |      |      |     |
| related RAS viral (r-ras) oncogene homolog                                          |     |       |    |      |      |     |
| tumor necrosis factor                                                               |     |       |    |      |      |     |
| tumor necrosis factor, alpha-induced protein 3                                      |     |       |    |      |      |     |
| tumor necrosis factor receptor superfamily, member 11a, NFKB activator              |     |       |    |      |      |     |
| tumor necrosis factor receptor superfamily, member 11b                              |     |       |    |      |      |     |
| tumor necrosis factor receptor superfamily, member 1A                               |     |       |    |      |      |     |
| tumor necrosis factor receptor superfamily, member 1B                               |     |       |    |      |      |     |
| tumor necrosis factor (ligand) superfamily, member 13b                              |     |       |    |      |      |     |
| TNFAIP3 interacting protein 1                                                       |     |       |    |      |      |     |
| TNF receptor-associated factor 2                                                    |     |       |    |      |      |     |
| TNF receptor-associated factor 5                                                    |     |       |    |      |      |     |
| TNF receptor-associated factor 6, E3 ubiquitin protein ligase                       |     |       |    |      |      |     |
| tumor protein p53                                                                   |     |       |    |      |      |     |

| <b>NFκB-dependent signaling</b>                                                     | <b>MVA</b> | <b>NYVAC</b> | <b>WR</b> | <b>NYBH</b> | <b>CopV</b> | <b>ANK</b> |
|-------------------------------------------------------------------------------------|------------|--------------|-----------|-------------|-------------|------------|
| v-akt murine thymoma viral oncogene homolog 2                                       |            |              |           |             |             |            |
| bone morphogenetic protein 2                                                        |            |              |           |             |             |            |
| bone morphogenetic protein receptor, type II (serine/threonine kinase)              |            |              |           |             |             |            |
| bone morphogenetic protein receptor, type IA                                        |            |              |           |             |             |            |
| caspace recruitment domain family, member 10                                        |            |              |           |             |             |            |
| caspace recruitment domain family, member 11                                        |            |              |           |             |             |            |
| CREB binding protein                                                                |            |              |           |             |             |            |
| epidermal growth factor                                                             |            |              |           |             |             |            |
| epidermal growth factor receptor                                                    |            |              |           |             |             |            |
| eukaryotic translation initiation factor 2-alpha kinase 2                           |            |              |           |             |             |            |
| E1A binding protein p300                                                            |            |              |           |             |             |            |
| Fc fragment of IgE, high affinity I, receptor for; gamma polypeptide                |            |              |           |             |             |            |
| fms-related tyrosine kinase 1                                                       |            |              |           |             |             |            |
| glycogen synthase kinase 3 beta                                                     |            |              |           |             |             |            |
| inhibitor of kappa light polypeptide gene enhancer in B-cells, kinase beta          |            |              |           |             |             |            |
| interleukin 33                                                                      |            |              |           |             |             |            |
| interleukin 1, alpha                                                                |            |              |           |             |             |            |
| interleukin 1, beta                                                                 |            |              |           |             |             |            |
| interleukin 1 receptor, type I                                                      |            |              |           |             |             |            |
| interleukin 1 receptor antagonist                                                   |            |              |           |             |             |            |
| interleukin 36, gamma                                                               |            |              |           |             |             |            |
| interleukin 36 receptor antagonist                                                  |            |              |           |             |             |            |
| insulin receptor                                                                    |            |              |           |             |             |            |
| interleukin-1 receptor-associated kinase 1                                          |            |              |           |             |             |            |
| interleukin-1 receptor-associated kinase 3                                          |            |              |           |             |             |            |
| kinase insert domain receptor (a type III receptor tyrosine kinase)                 |            |              |           |             |             |            |
| mitogen-activated protein kinase kinase 6                                           |            |              |           |             |             |            |
| mitogen-activated protein kinase kinase kinase 3                                    |            |              |           |             |             |            |
| mitogen-activated protein kinase kinase kinase 8                                    |            |              |           |             |             |            |
| mitogen-activated protein kinase kinase kinase 4                                    |            |              |           |             |             |            |
| mitogen-activated protein kinase 8                                                  |            |              |           |             |             |            |
| myeloid differentiation primary response 88                                         |            |              |           |             |             |            |
| nuclear factor of kappa light polypeptide gene enhancer in B-cells inhibitor, alpha |            |              |           |             |             |            |
| nuclear factor of kappa light polypeptide gene enhancer in B-cells inhibitor, beta  |            |              |           |             |             |            |
| phosphatidylinositol-4-phosphate 3-kinase, catalytic subunit type 2 beta            |            |              |           |             |             |            |
| phosphatidylinositol-4,5-bisphosphate 3-kinase, catalytic subunit delta             |            |              |           |             |             |            |
| phosphatidylinositol-4,5-bisphosphate 3-kinase, catalytic subunit gamma             |            |              |           |             |             |            |
| phosphoinositide-3-kinase, regulatory subunit 3 (gamma)                             |            |              |           |             |             |            |
| phospholipase C, gamma 2 (phosphatidylinositol-specific)                            |            |              |           |             |             |            |
| protein kinase, cAMP-dependent, catalytic, alpha                                    |            |              |           |             |             |            |
| protein kinase, cAMP-dependent, catalytic, beta                                     |            |              |           |             |             |            |
| protein kinase, cAMP-dependent, catalytic, gamma                                    |            |              |           |             |             |            |
| protein kinase C, beta                                                              |            |              |           |             |             |            |
| protein kinase C, theta                                                             |            |              |           |             |             |            |
| TGF-beta activated kinase 1/MAP3K7 binding protein 1                                |            |              |           |             |             |            |
| TGF-beta activated kinase 1/MAP3K7 binding protein 2                                |            |              |           |             |             |            |
| TGF-beta activated kinase 1/MAP3K7 binding protein 3                                |            |              |           |             |             |            |
| tyrosyl-DNA phosphodiesterase 2                                                     |            |              |           |             |             |            |
| transforming growth factor, beta receptor II                                        |            |              |           |             |             |            |
| transforming growth factor, beta receptor III                                       |            |              |           |             |             |            |
| toll-interleukin 1 receptor (TIR) domain containing adaptor protein                 |            |              |           |             |             |            |
| tumor necrosis factor                                                               |            |              |           |             |             |            |
| tumor necrosis factor, alpha-induced protein 3                                      |            |              |           |             |             |            |
| tumor necrosis factor receptor superfamily, member 11a, NFKB activator              |            |              |           |             |             |            |
| tumor necrosis factor receptor superfamily, member 11b                              |            |              |           |             |             |            |
| tumor necrosis factor receptor superfamily, member 1A                               |            |              |           |             |             |            |
| tumor necrosis factor receptor superfamily, member 1B                               |            |              |           |             |             |            |
| tumor necrosis factor (ligand) superfamily, member 13b                              |            |              |           |             |             |            |
| TNFAIP3 interacting protein 1                                                       |            |              |           |             |             |            |
| TNF receptor-associated factor 2                                                    |            |              |           |             |             |            |
| TNF receptor-associated factor 5                                                    |            |              |           |             |             |            |
| TNF receptor-associated factor 6, E3 ubiquitin protein ligase                       |            |              |           |             |             |            |
| ubiquitin-conjugating enzyme E2N                                                    |            |              |           |             |             |            |
| ubiquitin-conjugating enzyme E2 variant 1                                           |            |              |           |             |             |            |

|                                                                                             | MVA | NYVAC | WR | NYBH | CopV | ANK |
|---------------------------------------------------------------------------------------------|-----|-------|----|------|------|-----|
| v-akt murine thymoma viral oncogene homolog 2                                               |     |       |    |      |      |     |
| v-akt murine thymoma viral oncogene homolog 3 (protein kinase B, gamma)                     |     |       |    |      |      |     |
| BCL2-associated agonist of cell death                                                       |     |       |    |      |      |     |
| B-cell CLL/lymphoma 2                                                                       |     |       |    |      |      |     |
| BCL2-like 1                                                                                 |     |       |    |      |      |     |
| cyclin D1                                                                                   |     |       |    |      |      |     |
| cyclin-dependent kinase inhibitor 1A (p21, Cip1)                                            |     |       |    |      |      |     |
| cyclin-dependent kinase inhibitor 1B (p27, Kip1)                                            |     |       |    |      |      |     |
| eukaryotic translation initiation factor 4E                                                 |     |       |    |      |      |     |
| eukaryotic translation initiation factor 4E binding protein 1                               |     |       |    |      |      |     |
| forkhead box O1                                                                             |     |       |    |      |      |     |
| forkhead box O3                                                                             |     |       |    |      |      |     |
| GRB2-associated binding protein 1                                                           |     |       |    |      |      |     |
| GRB2-associated binding protein 2                                                           |     |       |    |      |      |     |
| growth differentiation factor 15                                                            |     |       |    |      |      |     |
| growth factor receptor-bound protein 2                                                      |     |       |    |      |      |     |
| glycogen synthase kinase 3 beta                                                             |     |       |    |      |      |     |
| glycogen synthase 1 (muscle)                                                                |     |       |    |      |      |     |
| H2B histone family, member M                                                                |     |       |    |      |      |     |
| v-Ha-ras Harvey rat sarcoma viral oncogene homolog                                          |     |       |    |      |      |     |
| inhibitor of kappa light polypeptide gene enhancer in B-cells, kinase beta                  |     |       |    |      |      |     |
| inhibitor of kappa light polypeptide gene enhancer in B-cells, kinase epsilon               |     |       |    |      |      |     |
| integrin-linked kinase                                                                      |     |       |    |      |      |     |
| inositol polyphosphate-5-phosphatase F                                                      |     |       |    |      |      |     |
| inositol polyphosphate-5-phosphatase K                                                      |     |       |    |      |      |     |
| inositol polyphosphate phosphatase-like 1                                                   |     |       |    |      |      |     |
| integrin, alpha 3 (antigen CD49C, alpha 3 subunit of VLA-3 receptor)                        |     |       |    |      |      |     |
| integrin, alpha 4 (antigen CD49D, alpha 4 subunit of VLA-4 receptor)                        |     |       |    |      |      |     |
| integrin, alpha 5 (fibronectin receptor, alpha polypeptide)                                 |     |       |    |      |      |     |
| Janus kinase 2                                                                              |     |       |    |      |      |     |
| Janus kinase 3                                                                              |     |       |    |      |      |     |
| mitogen-activated protein kinase kinase kinase 5                                            |     |       |    |      |      |     |
| mitogen-activated protein kinase 3                                                          |     |       |    |      |      |     |
| mitogen-activated protein kinase kinase kinase 8                                            |     |       |    |      |      |     |
| mitogen-activated protein kinase 8 interacting protein 1                                    |     |       |    |      |      |     |
| myeloid cell leukemia sequence 1 (BCL2-related)                                             |     |       |    |      |      |     |
| MDM2 oncogene, E3 ubiquitin protein ligase                                                  |     |       |    |      |      |     |
| mechanistic target of rapamycin (serine/threonine kinase)                                   |     |       |    |      |      |     |
| nuclear factor of kappa light polypeptide gene enhancer in B-cells 1                        |     |       |    |      |      |     |
| nuclear factor of kappa light polypeptide gene enhancer in B-cells inhibitor, alpha         |     |       |    |      |      |     |
| nuclear factor of kappa light polypeptide gene enhancer in B-cells inhibitor, beta          |     |       |    |      |      |     |
| nuclear factor of kappa light polypeptide gene enhancer in B-cells inhibitor, epsilon       |     |       |    |      |      |     |
| nitric oxide synthase 3 (endothelial cell)                                                  |     |       |    |      |      |     |
| oculocerebrorenal syndrome of Lowe                                                          |     |       |    |      |      |     |
| 3-phosphoinositide dependent protein kinase-1                                               |     |       |    |      |      |     |
| phosphatidylinositol-4,5-bisphosphate 3-kinase, catalytic subunit alpha                     |     |       |    |      |      |     |
| phosphatidylinositol-4,5-bisphosphate 3-kinase, catalytic subunit delta                     |     |       |    |      |      |     |
| phosphatidylinositol-4,5-bisphosphate 3-kinase, catalytic subunit gamma                     |     |       |    |      |      |     |
| phosphoinositide-3-kinase, regulatory subunit 3 (gamma)                                     |     |       |    |      |      |     |
| protein phosphatase, Mg2+/Mn2+ dependent, 1J                                                |     |       |    |      |      |     |
| protein phosphatase 2, catalytic subunit, alpha isozyme                                     |     |       |    |      |      |     |
| protein phosphatase 2, catalytic subunit, beta isozyme                                      |     |       |    |      |      |     |
| protein phosphatase 2A activator, regulatory subunit 4                                      |     |       |    |      |      |     |
| protein phosphatase 2, regulatory subunit A, alpha                                          |     |       |    |      |      |     |
| protein phosphatase 2, regulatory subunit A, beta                                           |     |       |    |      |      |     |
| protein phosphatase 2, regulatory subunit B, alpha                                          |     |       |    |      |      |     |
| protein phosphatase 2, regulatory subunit B'', alpha                                        |     |       |    |      |      |     |
| protein phosphatase 2, regulatory subunit B'', beta                                         |     |       |    |      |      |     |
| protein phosphatase 2, regulatory subunit B', beta                                          |     |       |    |      |      |     |
| protein phosphatase 2, regulatory subunit B', delta                                         |     |       |    |      |      |     |
| phosphatase and tensin homolog                                                              |     |       |    |      |      |     |
| prostaglandin-endoperoxide synthase 2 (prostaglandin G/H synthase and cyclooxygenase)       |     |       |    |      |      |     |
| v-raf-1 murine leukemia viral oncogene homolog 1                                            |     |       |    |      |      |     |
| ribosomal protein S6 kinase, 70kDa, polypeptide 1                                           |     |       |    |      |      |     |
| related RAS viral (r-ras) oncogene homolog 2                                                |     |       |    |      |      |     |
| related RAS viral (r-ras) oncogene homolog                                                  |     |       |    |      |      |     |
| stratifin                                                                                   |     |       |    |      |      |     |
| SHC (Src homology 2 domain containing) transforming protein 1                               |     |       |    |      |      |     |
| synaptojanin 1                                                                              |     |       |    |      |      |     |
| synaptojanin 2                                                                              |     |       |    |      |      |     |
| thioesterase superfamily member 4                                                           |     |       |    |      |      |     |
| tumor protein p53                                                                           |     |       |    |      |      |     |
| tuberous sclerosis 1                                                                        |     |       |    |      |      |     |
| tyrosine 3-monooxygenase/tryptophan 5-monooxygenase activation protein, epsilon polypeptide |     |       |    |      |      |     |
| tyrosine 3-monooxygenase/tryptophan 5-monooxygenase activation protein, gamma polypeptide   |     |       |    |      |      |     |
| tyrosine 3-monooxygenase/tryptophan 5-monooxygenase activation protein, eta polypeptide     |     |       |    |      |      |     |

Comparison of gene expression profiling between NYVAC-infected macrophages

| ProbeName     | SystematicName  | GeneSymbol  | GeneName                                              | EnsemblID       | NYVAC vs<br>MØ_logFC |
|---------------|-----------------|-------------|-------------------------------------------------------|-----------------|----------------------|
| A_21_P0003050 | TCONS_00006285  | XLOC_002890 |                                                       |                 | 2,38624671           |
| A_32_P438767  | NM_024019       | NEUROG2     | neurogenin 2                                          | ENST00000313341 | 2,326651432          |
| A_23_P431179  | NM_003538       | HIST1H4A    | histone cluster 1, H4a                                | ENST00000359907 | 2,265543648          |
| A_33_P3351851 | NM_003546       | HIST1H4L    | histone cluster 1, H4l                                | ENST00000355981 | 2,147993291          |
| A_33_P3390107 | NR_003286       | RN18S1      | RNA, 18S ribosomal 1                                  |                 | 2,047983979          |
| A_23_P359540  | NM_003540       | HIST1H4F    | histone cluster 1, H4f                                | ENST00000377745 | 2,021841656          |
| A_23_P30805   | NM_021968       | HIST1H4J    | histone cluster 1, H4j                                | ENST00000355057 | 1,963208031          |
| A_23_P388871  | NM_175054       | HIST4H4     | histone cluster 4, H4                                 | ENST00000539745 | 1,896223469          |
| A_33_P3383184 | ENST00000394967 | SP9         | Sp9 transcription factor homolog (mouse)              | ENST00000394967 | 1,888752537          |
| A_21_P0000504 | NR_023344       | RNU6ATAC    | RNA, U6atac small nuclear (U12-dependent splicing)    |                 | 1,874960371          |
| A_21_P0000513 | NR_026703       | VTRNA1-1    | vault RNA 1-1                                         |                 | 1,864358064          |
| A_33_P3404989 | NM_003536       | HIST1H3H    | histone cluster 1, H3h                                | ENST00000369163 | 1,861188517          |
| A_23_P436281  | NM_001034077    | HIST2H4B    | histone cluster 2, H4b                                | ENST00000392933 | 1,854265937          |
| A_33_P3410836 | NM_003539       | HIST1H4D    | histone cluster 1, H4d                                | ENST00000340756 | 1,852075751          |
| A_33_P3279708 | NR_002761       | RNU2-2      | RNA, U2 small nuclear 2                               | ENST00000538098 | 1,798736719          |
| A_24_P20873   | NM_003495       | HIST1H4I    | histone cluster 1, H4i                                | ENST00000354348 | 1,782941927          |
| A_33_P3344229 | NM_003538       | HIST1H4A    | histone cluster 1, H4a                                | ENST00000359907 | 1,703610189          |
| A_23_P323685  | NM_003543       | HIST1H4H    | histone cluster 1, H4h                                | ENST00000377727 | 1,676552547          |
| A_33_P3299865 | NM_003541       | HIST1H4K    | histone cluster 1, H4k                                | ENST00000355057 | 1,666910623          |
| A_21_P0004692 | ENST00000417800 | XLOC_005480 |                                                       | ENST00000417800 | 1,647030525          |
| A_23_P69537   | NM_006681       | NMU         | neuromedin U                                          | ENST00000541393 | 1,570671514          |
| A_32_P221799  | NM_003514       | HIST1H2AM   | histone cluster 1, H2am                               | ENST00000359611 | 1,500894358          |
| A_23_P30813   | NM_003541       | HIST1H4K    | histone cluster 1, H4k                                | ENST00000357549 | 1,498338395          |
| A_23_P163402  | NM_000499       | CYP1A1      | cytochrome P450, family 1, subfamily A, polypeptide 1 | ENST00000379727 | 1,494346188          |
| A_33_P3459365 | NR_034007       | LOC339894   | uncharacterized LOC339894                             | ENST00000471357 | 1,491633114          |
| A_23_P146198  | NM_000780       | CYP7A1      | cytochrome P450, family 7, subfamily A, polypeptide 1 | ENST00000301645 | 1,488781903          |



|                |                 |                |                                                             |                 |             |
|----------------|-----------------|----------------|-------------------------------------------------------------|-----------------|-------------|
| A_33_P3257678  | NM_001005464    | HIST2H3A       | histone cluster 2, H3a                                      | ENST00000369158 | 1,485379238 |
| A_23_P363174   | NM_003511       | HIST1H2AL      | histone cluster 1, H2al                                     | ENST00000357320 | 1,472973002 |
| A_33_P3424384  | ENST00000403537 | THUMPD2        | THUMP domain containing 2                                   | ENST00000403537 | 1,4503225   |
| A_23_P43337    | NM_144966       | FREM1          | FRAS1 related extracellular matrix 1                        | ENST00000380880 | 1,443428487 |
| A_21_P0000624  | NM_001243392    | SLC6A13        | solute carrier family 6 (neurotransmitter transporter, GABA | ENST00000436453 | 1,438684778 |
| A_21_P0004619  | ENST00000414364 | XLOC_005927    |                                                             | ENST00000414364 | 1,432428165 |
| A_33_P3273584  | NR_003023       | SCARNA2        | small Cajal body-specific RNA 2                             |                 | 1,39649973  |
| A_21_P0006741  | ENST00000446012 | XLOC_008762    |                                                             | ENST00000446012 | 1,394862071 |
| A_23_P27649    | NM_001080411    | ZNF433         | zinc finger protein 433                                     | ENST00000344980 | 1,392500102 |
| A_23_P52986    | NM_152718       | VWCE           | von Willebrand factor C and EGF domains                     | ENST00000335613 | 1,389358977 |
| A_21_P0004617  | ENST00000430078 | XLOC_005900    |                                                             | ENST00000430078 | 1,360318982 |
| A_21_P0002842  | ENST00000430018 | XLOC_003065    |                                                             | ENST00000430018 | 1,360184122 |
| A_23_P372860   | NM_003512       | HIST1H2AC      | histone cluster 1, H2ac                                     | ENST00000377791 | 1,356748647 |
| A_23_P124905   | NM_002522       | NPTX1          | neuronal pentraxin I                                        | ENST00000535681 | 1,35604953  |
| A_33_P3238455  | NR_034009       | SRSF6          | serine/arginine-rich splicing factor 6                      | ENST00000483871 | 1,347909876 |
| A_21_P0014262  | XR_109039       | LOC100507144   | uncharacterized LOC100507144                                |                 | 1,341218083 |
| A_33_P3274034  | ENST00000316024 | WRAP53         | WD repeat containing, antisense to TP53                     | ENST00000316024 | 1,334266993 |
| A_21_P0000514  | NR_026704       | VTRNA1-2       | vault RNA 1-2                                               |                 | 1,325241022 |
| A_21_P0000197  | NM_021064       | HIST1H2AG      | histone cluster 1, H2ag                                     | ENST00000359193 | 1,324710317 |
| A_21_P0010779  | ENST00000441085 | XLOC_I2_001138 |                                                             | ENST00000441085 | 1,314183604 |
| A_21_P0014894  | XR_132878       | LOC100652757   | uncharacterized LOC100652757                                |                 | 1,309465548 |
| A_33_P3229246  | NM_003528       | HIST2H2BE      | histone cluster 2, H2be                                     | ENST00000369155 | 1,3076243   |
| A_21_P0001880  | ENST00000453951 | XLOC_001537    |                                                             | ENST00000453951 | 1,299647309 |
| A_33_P3229335  | NM_175055       | HIST3H2BB      | histone cluster 3, H2bb                                     | ENST00000369160 | 1,292079363 |
| A_23_P52121    | NM_002614       | PDZK1          | PDZ domain containing 1                                     | ENST00000451928 | 1,289380329 |
| A_19_P00316836 | ENST00000377469 | XLOC_001537    |                                                             | ENST00000377469 | 1,282151265 |
| A_33_P3237210  | AF445025        | SLC35A4        | solute carrier family 35, member A4                         | ENST00000514199 | 1,26580665  |
| A_23_P406071   | ENST00000408913 | ZFP36L1        | zinc finger protein 36, C3H type-like 1                     | ENST00000408913 | 1,263178137 |
| A_21_P0002300  | TCONS_00003905  | XLOC_001710    |                                                             |                 | 1,251763042 |

|                |                  |                |                                                 |                 |  |             |
|----------------|------------------|----------------|-------------------------------------------------|-----------------|--|-------------|
| A_21_P0002307  | TCONS_00003921   | XLOC_001726    |                                                 |                 |  | 1,247235459 |
| A_33_P3267263  | NR_004400        | RNU1-5         | RNA, U1 small nuclear 5                         |                 |  | 1,244573855 |
| A_21_P0005128  | TCONS_00012569   | XLOC_005426    |                                                 |                 |  | 1,243775961 |
| A_21_P0000584  | NR_030583        | VTRNA2-1       | vault RNA 2-1                                   |                 |  | 1,239869842 |
| A_23_P407080   | NM_173489        | HEATR7B2       | HEAT repeat family member 7B2                   | ENST00000399564 |  | 1,239192008 |
| A_19_P00322743 | XR_110481        | LOC100506029   | uncharacterized LOC100506029                    |                 |  | 1,239007825 |
| A_21_P0002602  | TCONS_00004841   | XLOC_001564    |                                                 |                 |  | 1,2388295   |
| A_33_P3211513  | NM_001162407     | CLK1           | CDC-like kinase 1                               | ENST00000357369 |  | 1,234222578 |
| A_23_P13772    | NM_016569        | TBX3           | T-box 3                                         | ENST00000361100 |  | 1,233687188 |
| A_24_P48057    | NM_005853        | IRX5           | iroquois homeobox 5                             | ENST00000447390 |  | 1,227779538 |
| A_19_P00315791 | NR_034007        | LOC339894      | uncharacterized LOC339894                       | ENST00000471357 |  | 1,22670996  |
| A_23_P50638    | NM_052972        | LRG1           | leucine-rich alpha-2-glycoprotein 1             | ENST00000306390 |  | 1,219588196 |
| A_23_P102172   | NM_173077        | CPO            | carboxypeptidase O                              | ENST00000272852 |  | 1,214401677 |
| A_33_P3270429  | ENST00000383773  | NR1D2          | nuclear receptor subfamily 1, group D, member 2 | ENST00000383773 |  | 1,209567725 |
| A_33_P3507384  | AK056398         | LOC152274      | uncharacterized LOC152274                       |                 |  | 1,209303131 |
| A_21_P0012091  | ENST00000438056  | XLOC_I2_008261 |                                                 | ENST00000438056 |  | 1,192358661 |
| A_23_P2283     | NM_013251        | TAC3           | tachykinin 3                                    | ENST00000393867 |  | 1,189937798 |
| A_21_P0013490  | TCONS_I2_0002778 | XLOC_I2_014217 |                                                 |                 |  | 1,186701308 |
| A_21_P0014049  | NR_027420        | LOC389834      | ankyrin repeat domain 57 pseudogene             |                 |  | 1,186055239 |
| A_24_P277673   | NM_003547        | HIST1H4G       | histone cluster 1, H4g                          | ENST00000244537 |  | 1,185671622 |
| A_33_P3417339  | NM_020859        | SHROOM3        | shroom family member 3                          | ENST00000264907 |  | 1,182138604 |
| A_21_P0000515  | NR_026705        | VTRNA1-3       | vault RNA 1-3                                   |                 |  | 1,178269784 |
| A_33_P3409854  | NM_005568        | LHX1           | LIM homeobox 1                                  | ENST00000254457 |  | 1,174698682 |
| A_21_P0010624  | TCONS_I2_0000128 | XLOC_I2_000941 |                                                 |                 |  | 1,167449867 |
| A_21_P0013280  | TCONS_I2_0002638 | XLOC_I2_013728 |                                                 |                 |  | 1,165460024 |
| A_33_P3209816  | NM_207325        | DPY19L3        | dpy-19-like 3 (C. elegans)                      | ENST00000392248 |  | 1,163776663 |
| A_33_P3247838  | NM_001136501     | ZNF844         | zinc finger protein 844                         | ENST00000439326 |  | 1,159326672 |
| A_21_P0003186  | NR_034007        | LOC339894      | uncharacterized LOC339894                       | ENST00000471357 |  | 1,157516102 |
| A_24_P55148    | NM_021058        | HIST1H2BJ      | histone cluster 1, H2bj                         | ENST00000339812 |  | 1,155634587 |



|               |                 |                |                                                         |                 |             |
|---------------|-----------------|----------------|---------------------------------------------------------|-----------------|-------------|
| A_33_P3257252 | NM_138347       | ZNF551         | zinc finger protein 551                                 | ENST00000359821 | 1,155389579 |
| A_24_P274615  | NM_020801       | ARRDC3         | arrestin domain containing 3                            | ENST00000265138 | 1,150613648 |
| A_33_P3295749 | ENST00000378689 | GLIPR1L2       | GLI pathogenesis-related 1 like 2                       | ENST00000378689 | 1,149619637 |
| A_33_P3270172 | NR_027022       | LOC127841      | uncharacterized LOC127841                               |                 | 1,149152372 |
| A_33_P3400699 | NM_206883       | SLC26A5        | solute carrier family 26, member 5 (prestin)            | ENST00000339444 | 1,149092438 |
| A_23_P24275   | NR_027709       | IDI2-AS1       | IDI2 antisense RNA 1 (non-protein coding)               | ENST00000536039 | 1,148732829 |
| A_21_P0005322 | ENST00000485282 | XLOC_006555    |                                                         | ENST00000485282 | 1,148646249 |
| A_24_P408603  | NM_171998       | RAB39B         | RAB39B, member RAS oncogene family                      | ENST00000369454 | 1,144825878 |
| A_33_P3649472 | NR_027078       | LOC283856      | uncharacterized LOC283856                               |                 | 1,142857735 |
| A_23_P363936  | NM_014278       | HSPA4L         | heat shock 70kDa protein 4-like                         | ENST00000296464 | 1,140433465 |
| A_33_P3286953 | NM_197941       | ADAMTS6        | ADAM metalloproteinase with thrombospondin type 1 motif | ENST00000381052 | 1,138257224 |
| A_23_P108743  | NM_152381       | XIRP2          | xin actin-binding repeat containing 2                   | ENST00000295237 | 1,134776282 |
| A_33_P3287879 | NM_003536       | HIST1H3H       | histone cluster 1, H3h                                  | ENST00000369163 | 1,132411534 |
| A_24_P166407  | NM_003544       | HIST1H4B       | histone cluster 1, H4b                                  | ENST00000377364 | 1,132250662 |
| A_33_P3305620 | NM_001184717    | TIPARP         | TCDD-inducible poly(ADP-ribose) polymerase              | ENST00000461166 | 1,130406038 |
| A_21_P0009807 | TCONS_00027767  | XLOC_013356    |                                                         |                 | 1,125500628 |
| A_24_P500422  | NR_024403       | LOC730101      | uncharacterized LOC730101                               |                 | 1,123469963 |
| A_33_P3300800 | NR_024042       | GUCY2E         | guanylate cyclase 2E                                    | ENST00000526984 | 1,117878196 |
| A_21_P0013178 | THC2680431      | XLOC_I2_013295 |                                                         |                 | 1,115103579 |
| A_23_P151851  | NM_014080       | DUOX2          | dual oxidase 2                                          | ENST00000389039 | 1,113901338 |
| A_23_P107744  | NM_030760       | S1PR5          | sphingosine-1-phosphate receptor 5                      | ENST00000359134 | 1,113889947 |
| A_21_P0009763 | TCONS_00027300  | XLOC_013300    |                                                         |                 | 1,112795746 |
| A_23_P316582  | NM_152355       | ZNF441         | zinc finger protein 441                                 | ENST00000454339 | 1,112436561 |
| A_23_P415411  | NM_003545       | HIST1H4E       | histone cluster 1, H4e                                  | ENST00000360441 | 1,106366303 |
| A_33_P3336632 | NR_003287       | RN28S1         | RNA, 28S ribosomal 1                                    |                 | 1,105798138 |
| A_21_P0000487 | NR_004378       | SNORD94        | small nucleolar RNA, C/D box 94                         |                 | 1,102631029 |
| A_21_P0005609 | NR_024586       | LOC100216545   | uncharacterized LOC100216545                            |                 | 1,100309286 |
| A_23_P133842  | NM_005323       | HIST1H1T       | histone cluster 1, H1t                                  | ENST00000338379 | 1,096873268 |
| A_33_P3389394 | NR_002312       | RPPH1          | ribonuclease P RNA component H1                         | ENST00000554988 | 1,092715272 |

|                |                 |                |                                                         |                 |             |
|----------------|-----------------|----------------|---------------------------------------------------------|-----------------|-------------|
| A_33_P3420259  | NR_003287       | RN28S1         | RNA, 28S ribosomal 1                                    |                 | 1,091172157 |
| A_33_P3252730  | NR_027049       | ZNF788         | zinc finger family member 788                           | ENST00000339302 | 1,088475688 |
| A_33_P3274622  | NR_029401       | LOC731275      | uncharacterized LOC731275                               | ENST00000417964 | 1,0854371   |
| A_23_P39251    | NM_001013706    | PLIN5          | perilipin 5                                             | ENST00000381848 | 1,084489087 |
| A_32_P183904   | NM_138356       | SHF            | Src homology 2 domain containing F                      | ENST00000458022 | 1,082253082 |
| A_33_P3403254  | NM_001080404    | ZNF878         | zinc finger protein 878                                 | ENST00000440730 | 1,077044084 |
| A_21_P0013267  | NR_026999       | LINC00265      | long intergenic non-protein coding RNA 265              | ENST00000427210 | 1,075074332 |
| A_33_P3319113  | NM_017990       | PDPR           | pyruvate dehydrogenase phosphatase regulatory subunit   | ENST00000398122 | 1,069637449 |
| A_24_P250227   | NM_021724       | NR1D1          | nuclear receptor subfamily 1, group D, member 1         | ENST00000246672 | 1,067709913 |
| A_33_P3372069  | NM_182971       | COX8C          | cytochrome c oxidase subunit VIII C                     | ENST00000342144 | 1,066852631 |
| A_33_P3345309  | NM_001195129    | PRSS56         | protease, serine, 56                                    |                 | 1,066839634 |
| A_23_P93258    | NM_003537       | HIST1H3B       | histone cluster 1, H3b                                  | ENST00000244661 | 1,066138355 |
| A_33_P3262485  | NM_145276       | ZNF563         | zinc finger protein 563                                 | ENST00000293725 | 1,065177165 |
| A_33_P3291614  | XR_110031       | LOC100133039   | uncharacterized LOC100133039                            |                 | 1,060295362 |
| A_33_P3326545  | NM_182492       | LRP5L          | low density lipoprotein receptor-related protein 5-like | ENST00000402785 | 1,056555569 |
| A_33_P3229239  | NM_001024599    | HIST2H2BF      | histone cluster 2, H2bf                                 | ENST00000369167 | 1,056530709 |
| A_33_P3424566  | XR_108650       | FLJ38717       | FLJ38717 protein                                        |                 | 1,055567546 |
| A_33_P3384775  | ENST00000398497 | ZNF295         | zinc finger protein 295                                 | ENST00000398497 | 1,049866026 |
| A_21_P0000621  | NR_034008       | LOC100498859   | uncharacterized LOC100498859                            | ENST00000471719 | 1,043885623 |
| A_21_P0000338  | NR_002984       | SNORA56        | small nucleolar RNA, H/ACA box 56                       | ENST00000481062 | 1,04351608  |
| A_23_P500998   | NM_152739       | HOXA9          | homeobox A9                                             | ENST00000242050 | 1,037831386 |
| A_21_P0001195  | ENST00000436974 | XLOC_001093    |                                                         | ENST00000436974 | 1,036212392 |
| A_21_P0007374  | AK054718        | XLOC_009507    |                                                         |                 | 1,033076048 |
| A_19_P00318728 | NR_034007       | LOC339894      | uncharacterized LOC339894                               | ENST00000471357 | 1,030928588 |
| A_21_P0010928  | ENST00000429110 | XLOC_l2_001731 |                                                         | ENST00000429110 | 1,028026737 |
| A_33_P3414107  | XR_108595       | LOC729040      | uncharacterized LOC729040                               | ENST00000440769 | 1,027197484 |
| A_21_P0008381  | ENST00000553378 | XLOC_010920    |                                                         | ENST00000553378 | 1,025661028 |
| A_21_P0010592  | NR_033908       | LOC100288069   | general transcription factor Ili pseudogene             | ENST00000447412 | 1,023354912 |
| A_23_P422933   | NM_020809       | ARHGAP20       | Rho GTPase activating protein 20                        | ENST00000524756 | 1,022648046 |

|                |                  |                |                                                             |                 |             |
|----------------|------------------|----------------|-------------------------------------------------------------|-----------------|-------------|
| A_23_P397293   | NM_017527        | LY6K           | lymphocyte antigen 6 complex, locus K                       | ENST00000292430 | 1,022002473 |
| A_33_P3253501  | NM_001161334     | HIST2H2BF      | histone cluster 2, H2bf                                     | ENST00000369167 | 1,017458396 |
| A_33_P3307990  | NM_006610        | MASP2          | mannan-binding lectin serine peptidase 2                    | ENST00000400897 | 1,01499943  |
| A_33_P3261173  | NM_005479        | FRAT1          | frequently rearranged in advanced T-cell lymphomas          | ENST00000490980 | 1,014765424 |
| A_24_P390909   | NM_181882        | PRX            | periaxin                                                    | ENST00000341562 | 1,013064084 |
| A_19_P00330549 | NR_034127        | LOC100132356   | uncharacterized LOC100132356                                |                 | 1,012431503 |
| A_21_P0006410  | ENST00000420865  | XLOC_007911    |                                                             | ENST00000420865 | 1,009264605 |
| A_24_P9321     | NM_003533        | HIST1H3I       | histone cluster 1, H3i                                      | ENST00000328488 | 1,007210456 |
| A_21_P0005460  | ENST00000469418  | XLOC_006324    |                                                             | ENST00000469418 | 1,006067701 |
| A_21_P0012089  | NR_026758        | LOC440905      | uncharacterized LOC440905                                   | ENST00000449170 | 1,005333559 |
| A_21_P0014042  | NM_001135844     | SIRPB1         | signal-regulatory protein beta 1                            | ENST00000381596 | 1,003020538 |
| A_21_P0008136  | ENST00000420210  | XLOC_010556    |                                                             | ENST00000420210 | 1,000169485 |
| A_23_P28598    | NM_004405        | DLX2           | distal-less homeobox 2                                      | ENST00000234198 | 0,998959923 |
| A_33_P3388061  | NM_181617        | KRTAP21-2      | keratin associated protein 21-2                             | ENST00000333892 | 0,997994593 |
| A_23_P114626   | NM_000488        | SERPINC1       | serpin peptidase inhibitor, clade C (antithrombin), member  | ENST00000351522 | 0,997749985 |
| A_23_P4850     | NM_145233        | ZNF625         | zinc finger protein 625                                     | ENST00000439556 | 0,996161928 |
| A_33_P3303748  | NM_017990        | PDPR           | pyruvate dehydrogenase phosphatase regulatory subunit       | ENST00000429810 | 0,995603536 |
| A_33_P3362652  | NM_001005514     | OR5H14         | olfactory receptor, family 5, subfamily H, member 14        | ENST00000437310 | 0,992789263 |
| A_21_P0012909  | TCONS_I2_0002293 | XLOC_I2_012071 |                                                             |                 | 0,991736026 |
| A_21_P0004875  | TCONS_00011790   | XLOC_005264    |                                                             |                 | 0,990761786 |
| A_23_P146783   | NM_004543        | NEB            | nebulin                                                     | ENST00000509223 | 0,990758896 |
| A_23_P114626   | NM_000488        | SERPINC1       | serpin peptidase inhibitor, clade C (antithrombin), member  | ENST00000351522 | 0,990373706 |
| A_33_P3274618  | NR_029401        | LOC731275      | uncharacterized LOC731275                                   | ENST00000427210 | 0,990117488 |
| A_32_P886589   | NM_175895        | C12orf61       | chromosome 12 open reading frame 61                         | ENST00000408887 | 0,988317427 |
| A_21_P0001652  | TCONS_00001898   | XLOC_001286    |                                                             |                 | 0,987617085 |
| A_33_P3329834  | NM_018061        | PRPF38B        | PRP38 pre-mRNA processing factor 38 (yeast) domain cont     | ENST00000370022 | 0,986882131 |
| A_24_P34155    | NM_001122607     | RUNX1          | runt-related transcription factor 1                         | ENST00000479325 | 0,984861321 |
| A_21_P0014744  | ENST00000442130  | LOC100287049   |                                                             | ENST00000442130 | 0,982663722 |
| A_23_P64980    | NM_016615        | SLC6A13        | solute carrier family 6 (neurotransmitter transporter, GABA | ENST00000343164 | 0,979902649 |

|                |                 |                |                                                               |                 |             |
|----------------|-----------------|----------------|---------------------------------------------------------------|-----------------|-------------|
| A_21_P0013439  | ENST00000412091 | XLOC_I2_013873 |                                                               | ENST00000412091 | 0,979774766 |
| A_23_P362148   | NM_139072       | DNER           | delta/notch-like EGF repeat containing                        | ENST00000543700 | 0,97701406  |
| A_21_P0000384  | NR_003066       | SNORD85        | small nucleolar RNA, C/D box 85                               |                 | 0,976024604 |
| A_33_P3293675  | NM_006598       | SLC12A7        | solute carrier family 12 (potassium/chloride transporters), r | ENST00000343658 | 0,973374172 |
| A_33_P3360216  | NM_003509       | HIST1H2AI      | histone cluster 1, H2ai                                       |                 | 0,973103971 |
| A_33_P3413667  | NM_001136001    | ABL2           | v-abl Abelson murine leukemia viral oncogene homolog 2        | ENST00000392043 | 0,972576133 |
| A_21_P0000730  | NR_038235       | LOC100507651   | uncharacterized LOC100507651                                  |                 | 0,971362356 |
| A_33_P3373046  | NM_001024596    | ZNF772         | zinc finger protein 772                                       | ENST00000291809 | 0,970652211 |
| A_23_P130764   | NM_170720       | KCNJ14         | potassium inwardly-rectifying channel, subfamily J, member    | ENST00000391884 | 0,970182063 |
| A_33_P3332348  | NR_002715       | RN7SL1         | RNA, 7SL, cytoplasmic 1                                       | ENST00000553637 | 0,970071493 |
| A_33_P3394517  | NM_015092       | SMG1           | smg-1 homolog, phosphatidylinositol 3-kinase-related kinase   | ENST00000454049 | 0,967624803 |
| A_33_P3284448  | NR_038857       | LOC441009      | uncharacterized LOC441009                                     |                 | 0,96726738  |
| A_21_P0005039  | TCONS_00012219  | XLOC_005778    |                                                               |                 | 0,966177258 |
| A_23_P59410    | NM_030615       | KIF25          | kinesin family member 25                                      | ENST00000354419 | 0,962288962 |
| A_23_P30799    | NM_021018       | HIST1H3F       | histone cluster 1, H3f                                        | ENST00000446824 | 0,960146175 |
| A_21_P0010400  | TCONS_00029538  | XLOC_014188    |                                                               |                 | 0,960021123 |
| A_23_P167997   | NM_003518       | HIST1H2BG      | histone cluster 1, H2bg                                       | ENST00000244601 | 0,959367344 |
| A_33_P3714482  | NM_001135772    | LRP5L          | low density lipoprotein receptor-related protein 5-like       | ENST00000468442 | 0,958876668 |
| A_24_P223384   | NM_003513       | HIST1H2AB      | histone cluster 1, H2ab                                       | ENST00000259791 | 0,958857198 |
| A_23_P114626   | NM_000488       | SERPINC1       | serpin peptidase inhibitor, clade C (antithrombin), member    | ENST00000351522 | 0,958449574 |
| A_21_P0001185  | ENST00000431097 | XLOC_001070    |                                                               | ENST00000431097 | 0,956648443 |
| A_23_P143845   | NM_015508       | TIPARP         | TCDD-inducible poly(ADP-ribose) polymerase                    | ENST00000461166 | 0,951894614 |
| A_33_P3258602  | NM_001005566    | OR5B2          | olfactory receptor, family 5, subfamily B, member 2           | ENST00000302581 | 0,951811442 |
| A_23_P255331   | NM_032623       | C4orf49        | chromosome 4 open reading frame 49                            | ENST00000398955 | 0,949708214 |
| A_33_P3386099  | NM_001114123    | ELK1           | ELK1, member of ETS oncogene family                           | ENST00000343894 | 0,948170465 |
| A_23_P320530   | NM_001010880    | ZNF780A        | zinc finger protein 780A                                      | ENST00000455521 | 0,9472919   |
| A_19_P00802607 | TCONS_00003738  | XLOC_001537    |                                                               |                 | 0,9467791   |
| A_33_P3216605  | NM_014698       | TMEM63A        | transmembrane protein 63A                                     |                 | 0,94380536  |
| A_33_P3506553  | NR_038871       | C21orf91-OT1   | C21orf91 overlapping transcript 1 (non-protein coding)        | ENST00000439392 | 0,941685553 |

|                |                  |                |                                                            |                 |             |
|----------------|------------------|----------------|------------------------------------------------------------|-----------------|-------------|
| A_23_P93180    | NM_003526        | HIST1H2BC      | histone cluster 1, H2bc                                    | ENST00000396984 | 0,941412395 |
| A_33_P3305521  | AB029007         | ZNF507         | zinc finger protein 507                                    |                 | 0,94032667  |
| A_24_P387321   | NM_016264        | ZNF44          | zinc finger protein 44                                     | ENST00000355684 | 0,938933612 |
| A_21_P0008041  | TCONS_00021740   | XLOC_010330    |                                                            |                 | 0,93838805  |
| A_23_P48698    | NM_003814        | ADAM20         | ADAM metallopeptidase domain 20                            | ENST00000256389 | 0,938192528 |
| A_21_P0005449  | TCONS_00013649   | XLOC_006303    |                                                            |                 | 0,93473958  |
| A_32_P25295    | NM_006160        | NEUROD2        | neurogenic differentiation 2                               | ENST00000302584 | 0,934085934 |
| A_21_P0006879  | TCONS_00018225   | XLOC_008503    |                                                            |                 | 0,933419416 |
| A_24_P67898    | ENST00000370094  | MGEA5          | meningioma expressed antigen 5 (hyaluronidase)             | ENST00000370094 | 0,932258539 |
| A_32_P336776   | NM_194277        | FRMD7          | FERM domain containing 7                                   | ENST00000298542 | 0,932169364 |
| A_32_P195647   | NM_030624        | KLHL15         | kelch-like 15 (Drosophila)                                 | ENST00000328046 | 0,930138074 |
| A_33_P3375790  | NM_001145014     | RFPL4A         | ret finger protein-like 4A                                 | ENST00000341750 | 0,929834416 |
| A_21_P0013179  | ENST00000419463  | XLOC_l2_013295 |                                                            | ENST00000419463 | 0,929114239 |
| A_21_P0005397  | TCONS_00013523   | XLOC_006163    |                                                            |                 | 0,927799487 |
| A_21_P0013304  | TCONS_l2_0002655 | XLOC_l2_013808 |                                                            |                 | 0,927618315 |
| A_21_P0003088  | TCONS_00006375   | XLOC_002995    |                                                            |                 | 0,923637084 |
| A_21_P0009038  | TCONS_00024666   | XLOC_011951    |                                                            |                 | 0,921812082 |
| A_24_P393958   | NM_007034        | DNAJB4         | DnaJ (Hsp40) homolog, subfamily B, member 4                | ENST00000370763 | 0,920450384 |
| A_33_P3378935  | AB209007         | RBM14          | RNA binding motif protein 14                               | ENST00000409372 | 0,920227275 |
| A_23_P114626   | NM_000488        | SERPINC1       | serpin peptidase inhibitor, clade C (antithrombin), member | ENST00000351522 | 0,918521618 |
| A_32_P151875   | NM_020781        | ZNF398         | zinc finger protein 398                                    | ENST00000426851 | 0,916691603 |
| A_23_P102172   | NM_173077        | CPO            | carboxypeptidase O                                         | ENST00000272852 | 0,913271073 |
| A_19_P00317501 | NR_034007        | LOC339894      | uncharacterized LOC339894                                  | ENST00000471357 | 0,910467402 |
| A_33_P3695899  | XR_108600        | FLJ31104       | uncharacterized LOC441072                                  | ENST00000500093 | 0,909059661 |
| A_23_P374689   | NM_000817        | GAD1           | glutamate decarboxylase 1 (brain, 67kDa)                   | ENST00000478562 | 0,909028367 |
| A_23_P423427   | NM_177454        | FAM171B        | family with sequence similarity 171, member B              | ENST00000304698 | 0,908992719 |
| A_33_P3421703  | ENST00000322172  | SP2            | Sp2 transcription factor                                   | ENST00000322172 | 0,90848846  |
| A_21_P0013355  | TCONS_l2_0002696 | XLOC_l2_014050 |                                                            |                 | 0,906871693 |
| A_21_P0010447  | BC043011         | XLOC_014395    |                                                            |                 | 0,898964013 |

|                |                 |              |                                                        |                 |             |
|----------------|-----------------|--------------|--------------------------------------------------------|-----------------|-------------|
| A_19_P00317318 | NM_001145664    | RFX8         |                                                        | ENST00000540519 | 0,89769491  |
| A_33_P3613000  | NM_001105539    | ZBTB10       | zinc finger and BTB domain containing 10               | ENST00000379091 | 0,896870026 |
| A_24_P380679   | NM_182597       | C7orf53      | chromosome 7 open reading frame 53                     | ENST00000312849 | 0,895418541 |
| A_33_P3397323  | NM_152355       | ZNF441       | zinc finger protein 441                                | ENST00000357901 | 0,895391579 |
| A_21_P0014224  | XR_108920       | LOC100505760 | uncharacterized LOC100505760                           |                 | 0,89509522  |
| A_19_P00322440 | NR_036444       | LOC400550    | uncharacterized LOC400550                              |                 | 0,894196889 |
| A_23_P126313   | NM_018417       | ADCY10       | adenylate cyclase 10 (soluble)                         | ENST00000367848 | 0,893974408 |
| A_21_P0007252  | TCONS_00019425  | XLOC_009243  |                                                        |                 | 0,893438264 |
| A_33_P3372674  | NR_026784       | C6orf164     | chromosome 6 open reading frame 164                    | ENST00000369572 | 0,891210526 |
| A_21_P0002348  | TCONS_00004017  | XLOC_001856  |                                                        |                 | 0,890377978 |
| A_21_P0010220  | BC029473        | XLOC_013853  |                                                        |                 | 0,889730933 |
| A_33_P3379391  | NM_177925       | H2AFJ        | H2A histone family, member J                           | ENST00000228929 | 0,888715129 |
| A_33_P3264667  | NM_183374       | CYP26C1      | cytochrome P450, family 26, subfamily C, polypeptide 1 | ENST00000285949 | 0,887996137 |
| A_21_P0000682  | NR_037642       | LOC100527964 | uncharacterized LOC100527964                           | ENST00000415414 | 0,887834265 |
| A_21_P0007340  | ENST00000528366 | XLOC_009416  |                                                        | ENST00000528366 | 0,887106765 |
| A_33_P3379701  | BC017346        | TRIM36       | tripartite motif containing 36                         |                 | 0,886282376 |
| A_23_P97700    | NM_006472       | TXNIP        | thioredoxin interacting protein                        | ENST00000475171 | 0,885560467 |
| A_33_P3356371  | AK127766        | LOC100133089 | uncharacterized LOC100133089                           |                 | 0,884549037 |
| A_32_P189204   | NM_174942       | GAS2L3       | growth arrest-specific 2 like 3                        | ENST00000266754 | 0,88325134  |
| A_33_P3302632  | NM_003523       | HIST1H2BE    | histone cluster 1, H2be                                |                 | 0,882449698 |
| A_21_P0007693  | TCONS_00020732  | XLOC_010031  |                                                        |                 | 0,882362819 |
| A_33_P3216357  | NM_001146702    | KDM5C        | lysine (K)-specific demethylase 5C                     | ENST00000349663 | 0,882303368 |
| A_23_P102172   | NM_173077       | CPO          | carboxypeptidase O                                     | ENST00000272852 | 0,880500019 |
| A_21_P0014758  | XR_132514       | LOC100652921 | uncharacterized LOC100652921                           |                 | 0,878610372 |
| A_23_P346327   | NR_026674       | FLJ30679     | uncharacterized protein FLJ30679                       |                 | 0,877257405 |
| A_23_P19134    | NM_032119       | GPR98        | G protein-coupled receptor 98                          | ENST00000296619 | 0,876498102 |
| A_21_P0007465  | TCONS_00020094  | XLOC_009485  |                                                        |                 | 0,876312268 |
| A_21_P0003060  | TCONS_00006311  | XLOC_002925  |                                                        |                 | 0,875749089 |
| A_33_P3361412  | NM_018420       | SLC22A15     | solute carrier family 22, member 15                    | ENST00000369502 | 0,875712906 |



|               |                  |                |                                                              |                 |             |
|---------------|------------------|----------------|--------------------------------------------------------------|-----------------|-------------|
| A_23_P37942   | NM_021195        | CLDN6          | claudin 6                                                    | ENST00000328796 | 0,87503848  |
| A_21_P0010755 | NM_022064        | RNF123         | ring finger protein 123                                      | ENST00000443204 | 0,874871362 |
| A_33_P3353425 | NM_020935        | USP37          | ubiquitin specific peptidase 37                              | ENST00000478329 | 0,874440138 |
| A_33_P3351686 | NM_001114938     | CCDC17         | coiled-coil domain containing 17                             | ENST00000479529 | 0,874108528 |
| A_21_P0011082 | NR_040112        | A2MP1          | alpha-2-macroglobulin pseudogene 1                           | ENST00000543404 | 0,873468428 |
| A_21_P0000708 | NR_037933        | C14orf55       | metalloproteinase-disintegrin 1-2 pseudogene                 | ENST00000556964 | 0,872495843 |
| A_33_P3282374 | ENST00000535064  | TIAM2          | T-cell lymphoma invasion and metastasis 2                    | ENST00000535064 | 0,872095351 |
| A_33_P3357049 | NR_026768        | RPS15AP10      | ribosomal protein S15a pseudogene 10                         |                 | 0,870846972 |
| A_21_P0008892 | TCONS_00024294   | XLOC_011772    |                                                              |                 | 0,870364137 |
| A_21_P0011321 | TCONS_I2_0000861 | XLOC_I2_004640 |                                                              |                 | 0,868011311 |
| A_33_P3323298 | NM_002228        | JUN            | jun proto-oncogene                                           | ENST00000371222 | 0,867686325 |
| A_33_P3318439 | NM_001131034     | RNF212         | ring finger protein 212                                      | ENST00000382968 | 0,867311105 |
| A_21_P0007824 | TCONS_00021074   | XLOC_009668    |                                                              |                 | 0,866711619 |
| A_23_P208240  | ENST00000355147  | ZNF160         | zinc finger protein 160                                      | ENST00000355147 | 0,866495244 |
| A_23_P145024  | NM_000024        | ADRB2          | adrenergic, beta-2-, receptor, surface                       | ENST00000305988 | 0,865785347 |
| A_24_P146211  | NM_021063        | HIST1H2BD      | histone cluster 1, H2bd                                      | ENST00000377777 | 0,865041346 |
| A_33_P3264379 | NR_027049        | ZNF788         | zinc finger family member 788                                | ENST00000397759 | 0,864625033 |
| A_21_P0012044 | THC2689015       | XLOC_I2_007783 |                                                              |                 | 0,863975796 |
| A_23_P64913   | NM_006205        | PDE6H          | phosphodiesterase 6H, cGMP-specific, cone, gamma             | ENST00000266395 | 0,863646996 |
| A_21_P0007635 | TCONS_00020579   | XLOC_009895    |                                                              |                 | 0,861779566 |
| A_33_P3352632 | AK096262         | LOC728147      | uncharacterized LOC728147                                    |                 | 0,860928041 |
| A_33_P3278911 | NM_032205        | PHF20L1        | PHD finger protein 20-like 1                                 | ENST00000395382 | 0,860558947 |
| A_21_P0003369 | ENST00000508135  | XLOC_003549    |                                                              | ENST00000508135 | 0,859605335 |
| A_33_P3281532 | NM_022780        | RMND5A         | required for meiotic nuclear division 5 homolog A (S. cerevi | ENST00000283632 | 0,859551389 |
| A_33_P3839897 | DW419002         | RNU4ATAC       | RNA, U4atac small nuclear (U12-dependent splicing)           |                 | 0,858628905 |
| A_23_P111054  | NM_021062        | HIST1H2BB      | histone cluster 1, H2bb                                      | ENST00000357905 | 0,855348987 |
| A_21_P0001139 | AK128720         | PKP4           | plakophilin 4                                                | ENST00000448344 | 0,854929633 |
| A_23_P67278   | NM_005815        | ZNF443         | zinc finger protein 443                                      | ENST00000411622 | 0,854049745 |
| A_23_P301247  | NM_003517        | HIST2H2AC      | histone cluster 2, H2ac                                      | ENST00000331380 | 0,853886438 |

|                |                 |              |                                                             |                 |             |
|----------------|-----------------|--------------|-------------------------------------------------------------|-----------------|-------------|
| A_19_P00315502 | ENST00000417112 | P01115       |                                                             | ENST00000417112 | 0,853046477 |
| A_24_P145911   | ENST00000342294 | TRA2B        | transformer 2 beta homolog (Drosophila)                     | ENST00000342294 | 0,852239578 |
| A_32_P84242    | NM_015566       | FAM169A      | family with sequence similarity 169, member A               | ENST00000510609 | 0,85120098  |
| A_32_P387648   | NM_002016       | FLG          | filaggrin                                                   | ENST00000368799 | 0,849952795 |
| A_21_P0008992  | TCONS_00024502  | XLOC_011821  |                                                             |                 | 0,847374909 |
| A_21_P0007352  | TCONS_00019635  | XLOC_009437  |                                                             |                 | 0,847194759 |
| A_21_P0012911  | XM_003403424    | LOC100652810 | beta-glucuronidase-like protein SMA5-like                   |                 | 0,845697497 |
| A_23_P114626   | NM_000488       | SERPINC1     | serpin peptidase inhibitor, clade C (antithrombin), member  | ENST00000351522 | 0,845423429 |
| A_21_P0003823  | TCONS_00008729  | XLOC_003411  |                                                             |                 | 0,845137115 |
| A_33_P3276913  | ENST00000399010 | TTC3         | tetratricopeptide repeat domain 3                           | ENST00000399010 | 0,844373042 |
| A_21_P0001493  | TCONS_00001468  | XLOC_000794  |                                                             |                 | 0,843404886 |
| A_24_P143574   | NM_006065       | SIRPB1       | signal-regulatory protein beta 1                            | ENST00000279477 | 0,842611144 |
| A_23_P101476   | NM_030824       | ZNF442       | zinc finger protein 442                                     | ENST00000242804 | 0,841306127 |
| A_32_P173298   | NM_012426       | SF3B3        | splicing factor 3b, subunit 3, 130kDa                       | ENST00000310750 | 0,839969061 |
| A_19_P00318916 | NR_038988       | LOC100287765 |                                                             |                 | 0,839665454 |
| A_21_P0004452  | TCONS_00010518  | XLOC_005036  |                                                             |                 | 0,838615586 |
| A_21_P0005280  | TCONS_00013117  | XLOC_006335  |                                                             |                 | 0,838212422 |
| A_33_P3251347  | ENST00000378928 | TAB3         | TGF-beta activated kinase 1/MAP3K7 binding protein 3        | ENST00000378928 | 0,836740325 |
| A_23_P59069    | NM_003527       | HIST1H2BO    | histone cluster 1, H2bo                                     | ENST00000303806 | 0,835467901 |
| A_23_P157117   | NM_182898       | CREB5        | cAMP responsive element binding protein 5                   | ENST00000409603 | 0,83518868  |
| A_23_P93282    | NM_003535       | HIST1H3J     | histone cluster 1, H3j                                      | ENST00000359303 | 0,834762732 |
| A_21_P0000068  | NM_001167676    | LOC100128071 | uncharacterized LOC100128071                                |                 | 0,834342213 |
| A_21_P0004915  | TCONS_00011909  | XLOC_005410  |                                                             |                 | 0,833937746 |
| A_21_P0000371  | NR_003037       | SNORD7       | small nucleolar RNA, C/D box 7                              |                 | 0,833784681 |
| A_23_P108221   | NM_032037       | TSSK6        | testis-specific serine kinase 6                             | ENST00000360913 | 0,833610436 |
| A_23_P107744   | NM_030760       | S1PR5        | sphingosine-1-phosphate receptor 5                          | ENST00000359134 | 0,833056937 |
| A_33_P3385002  | NM_001114123    | ELK1         | ELK1, member of ETS oncogene family                         | ENST00000376983 | 0,833020797 |
| A_23_P116249   | NM_014619       | GRIK4        | glutamate receptor, ionotropic, kainate 4                   | ENST00000527524 | 0,832821389 |
| A_23_P92107    | NM_021082       | SLC15A2      | solute carrier family 15 (H+/peptide transporter), member 2 | ENST00000489711 | 0,83210099  |

|                |                  |                |                                                                |                 |             |
|----------------|------------------|----------------|----------------------------------------------------------------|-----------------|-------------|
| A_21_P0001371  | NM_001128223     | ZNF717         | zinc finger protein 717                                        | ENST00000422325 | 0,831508103 |
| A_21_P0012229  | ENST00000433303  | XLOC_I2_009181 |                                                                | ENST00000433303 | 0,831102296 |
| A_19_P00321110 | ENST00000449545  | LOC100505519   |                                                                | ENST00000449545 | 0,830366955 |
| A_33_P3411244  | NM_001005203     | OR8S1          | olfactory receptor, family 8, subfamily S, member 1            | ENST00000310194 | 0,828072818 |
| A_33_P3358943  | NM_000839        | GRM2           | glutamate receptor, metabotropic 2                             | ENST00000464585 | 0,828045986 |
| A_21_P0011463  | NM_015092        | SMG1           | smg-1 homolog, phosphatidylinositol 3-kinase-related kinase    | ENST00000447140 | 0,826971106 |
| A_33_P3305243  | ENST00000373903  | PSMD5          | proteasome (prosome, macropain) 26S subunit, non-ATPase        | ENST00000373903 | 0,826705877 |
| A_23_P203829   | NM_015394        | ZNF10          | zinc finger protein 10                                         | ENST00000426665 | 0,826617007 |
| A_21_P0013220  | BI830525         | XLOC_I2_013456 |                                                                |                 | 0,824542763 |
| A_23_P101476   | NM_030824        | ZNF442         | zinc finger protein 442                                        | ENST00000242804 | 0,823642686 |
| A_21_P0008109  | AF339799         | XLOC_010477    |                                                                | ENST00000434547 | 0,823418902 |
| A_32_P149546   | NM_014675        | CROCC          | ciliary rootlet coiled-coil, rootletin                         | ENST00000467715 | 0,822955058 |
| A_33_P3222233  | NM_001159747     | CC2D2B         | coiled-coil and C2 domain containing 2B                        | ENST00000475252 | 0,821373731 |
| A_21_P0013826  | TCONS_I2_0003055 | XLOC_I2_015773 |                                                                |                 | 0,821070155 |
| A_24_P918175   | BC009864         | LOC653581      | uncharacterized LOC653581                                      |                 | 0,820926056 |
| A_23_P110462   | NM_013340        | PCDHB1         | protocadherin beta 1                                           | ENST00000306549 | 0,820477743 |
| A_33_P3214119  | ENST00000528751  | NPEPPS         | aminopeptidase puromycin sensitive                             | ENST00000528751 | 0,819576896 |
| A_24_P247732   | NM_021095        | SLC5A6         | solute carrier family 5 (sodium-dependent vitamin transporter) | ENST00000442731 | 0,819400265 |
| A_23_P110234   | NM_001890        | CSN1S1         | casein alpha s1                                                | ENST00000505782 | 0,818904575 |
| A_23_P16242    | NM_021143        | ZNF20          | zinc finger protein 20                                         | ENST00000430024 | 0,818710305 |
| A_23_P101476   | NM_030824        | ZNF442         | zinc finger protein 442                                        | ENST00000242804 | 0,818435025 |
| A_21_P0014606  | ENST00000415255  | LOC100506950   |                                                                | ENST00000415255 | 0,818113036 |
| A_21_P0009632  | TCONS_00026722   | XLOC_012857    |                                                                |                 | 0,817904582 |
| A_21_P0008872  | AK025061         | FLJ21408       | uncharacterized LOC400512                                      |                 | 0,81678882  |
| A_23_P212089   | NM_031419        | NFKBIZ         | nuclear factor of kappa light polypeptide gene enhancer in I   | ENST00000326172 | 0,816666057 |
| A_23_P360626   | NM_178836        | PLD6           | phospholipase D family, member 6                               | ENST00000321560 | 0,81613914  |
| A_23_P101476   | NM_030824        | ZNF442         | zinc finger protein 442                                        | ENST00000242804 | 0,814901187 |
| A_21_P0000243  | NR_002439        | SNORD43        | small nucleolar RNA, C/D box 43                                | ENST00000453303 | 0,81305976  |
| A_21_P0006658  | THC2503064       | XLOC_008405    |                                                                |                 | 0,811575079 |

|               |                 |              |                                                                |                 |             |
|---------------|-----------------|--------------|----------------------------------------------------------------|-----------------|-------------|
| A_21_P0013976 | XM_001723486    | LOC100130476 | uncharacterized LOC100130476                                   |                 | 0,810944229 |
| A_33_P3343872 | NM_001039508    | SIRPG        | signal-regulatory protein gamma                                | ENST00000216927 | 0,810448321 |
| A_33_P3389478 | ENST00000380799 | SNAPC3       | small nuclear RNA activating complex, polypeptide 3, 50kDa     | ENST00000380799 | 0,810283136 |
| A_33_P3347928 | NM_020307       | CCNL1        | cyclin L1                                                      | ENST00000295925 | 0,809909285 |
| A_23_P101476  | NM_030824       | ZNF442       | zinc finger protein 442                                        | ENST00000242804 | 0,809662897 |
| A_21_P0014219 | XR_108902       | LOC100507204 | uncharacterized LOC100507204                                   |                 | 0,809601871 |
| A_23_P107744  | NM_030760       | S1PR5        | sphingosine-1-phosphate receptor 5                             | ENST00000359134 | 0,809368988 |
| A_33_P3308706 | ENST00000525257 | USP47        | ubiquitin specific peptidase 47                                | ENST00000525257 | 0,809335333 |
| A_23_P101476  | NM_030824       | ZNF442       | zinc finger protein 442                                        | ENST00000242804 | 0,808807253 |
| A_33_P3229370 | NM_001546       | ID4          | inhibitor of DNA binding 4, dominant negative helix-loop-helix | ENST00000378700 | 0,808547235 |
| A_21_P0014277 | ENST00000553105 | LOC100506606 |                                                                | ENST00000553105 | 0,806889169 |
| A_24_P925635  | NR_024271       | SEPT7P2      | septin 7 pseudogene 2                                          | ENST00000338231 | 0,806599055 |
| A_33_P3413821 | AK090554        | KIRREL       | kin of IRRE like (Drosophila)                                  | ENST00000368172 | 0,806171979 |
| A_33_P3385983 | NM_021143       | ZNF20        | zinc finger protein 20                                         | ENST00000292241 | 0,805309034 |
| A_21_P0001840 | AL117577        | XLOC_001377  |                                                                | ENST00000450628 | 0,804168011 |
| A_21_P0009462 | TCONS_00026292  | XLOC_012636  |                                                                |                 | 0,803998804 |
| A_23_P23646   | NM_007122       | USF1         | upstream transcription factor 1                                | ENST00000473969 | 0,803954484 |
| A_21_P0002438 | TCONS_00004245  | XLOC_002085  |                                                                |                 | 0,803760336 |
| A_24_P91405   | NM_152601       | ZNF709       | zinc finger protein 709                                        | ENST00000397732 | 0,803644803 |
| A_33_P3274129 | NM_001137560    | TMEM151B     | transmembrane protein 151B                                     | ENST00000451188 | 0,803495581 |
| A_21_P0012222 | BC036580        | C21orf81     | ankyrin repeat domain 20 family, member A3 pseudogene          |                 | 0,803043184 |
| A_24_P93736   | NR_024341       | FLJ40292     | uncharacterized LOC643210                                      |                 | 0,802847643 |
| A_23_P102172  | NM_173077       | CPO          | carboxypeptidase O                                             | ENST00000272852 | 0,802787783 |
| A_21_P0000502 | NR_004407       | RNU11        | RNA, U11 small nuclear                                         |                 | 0,802456501 |
| A_23_P114626  | NM_000488       | SERPINC1     | serpin peptidase inhibitor, clade C (antithrombin), member 1   | ENST00000351522 | 0,801324902 |
| A_23_P59045   | NM_021052       | HIST1H2AE    | histone cluster 1, H2ae                                        | ENST00000303910 | 0,800890637 |
| A_21_P0009749 | AK090762        | XLOC_013275  |                                                                |                 | 0,799913727 |
| A_33_P3379486 | AK127427        | LOC100130581 | uncharacterized LOC100130581                                   |                 | 0,799724476 |
| A_33_P3255914 | NM_013262       | MYLIP        | myosin regulatory light chain interacting protein              | ENST00000349606 | 0,797654096 |

|                |                  |                |                                                            |                 |  |             |
|----------------|------------------|----------------|------------------------------------------------------------|-----------------|--|-------------|
| A_19_P00322984 | THC2573057       | XLOC_006037    |                                                            |                 |  | 0,797000519 |
| A_23_P410625   | NM_153695        | ZNF367         | zinc finger protein 367                                    | ENST00000375256 |  | 0,79679005  |
| A_33_P3381781  | ENST00000369067  | RPRD2          | regulation of nuclear pre-mRNA domain containing 2         | ENST00000369067 |  | 0,796712306 |
| A_23_P366216   | NM_003524        | HIST1H2BH      | histone cluster 1, H2bh                                    | ENST00000356350 |  | 0,796652584 |
| A_33_P3297517  | NM_001243879     | TRA2B          | transformer 2 beta homolog (Drosophila)                    | ENST00000342294 |  | 0,795075614 |
| A_23_P114626   | NM_000488        | SERPINC1       | serpin peptidase inhibitor, clade C (antithrombin), member | ENST00000351522 |  | 0,794977952 |
| A_23_P326931   | NM_145170        | TTC18          | tetratricopeptide repeat domain 18                         | ENST00000394865 |  | 0,794847789 |
| A_33_P3310966  | AK092192         | LOC100128501   | uncharacterized LOC100128501                               |                 |  | 0,792718376 |
| A_33_P3389113  | NR_034108        | TRAF3IP2-AS1   | TRAF3IP2 antisense RNA 1 (non-protein coding)              |                 |  | 0,792230586 |
| A_21_P0013877  | TCONS_I2_0003089 | XLOC_I2_015885 |                                                            |                 |  | 0,791649176 |
| A_24_P206317   | NM_058176        | HDAC9          | histone deacetylase 9                                      | ENST00000461159 |  | 0,791366578 |
| A_24_P359030   | NR_024233        | LINC00167      | long intergenic non-protein coding RNA 167                 |                 |  | 0,790564035 |
| A_24_P350744   | NM_014949        | KIAA0907       | KIAA0907                                                   | ENST00000466713 |  | 0,789759003 |
| A_23_P369328   | NM_145306        | C10orf35       | chromosome 10 open reading frame 35                        | ENST00000373279 |  | 0,7890123   |
| A_33_P3390955  | NR_004422        | HPVC1          | human papillomavirus (type 18) E5 central sequence-like 1  |                 |  | 0,788619998 |
| A_33_P3246997  | ENST00000311571  | LUC7L3         | LUC7-like 3 (S. cerevisiae)                                | ENST00000311571 |  | 0,787745921 |
| A_21_P0007578  | TCONS_00020465   | XLOC_009798    |                                                            |                 |  | 0,787528391 |
| A_33_P3327519  | NR_002915        | SNORA74A       | small nucleolar RNA, H/ACA box 74A                         |                 |  | 0,787386502 |
| A_33_P3416301  | NM_198256        | E2F6           | E2F transcription factor 6                                 | ENST00000362009 |  | 0,786942371 |
| A_21_P0000293  | NR_002908        | SNORD20        | small nucleolar RNA, C/D box 20                            |                 |  | 0,786390519 |
| A_23_P134237   | NM_002889        | RARRES2        | retinoic acid receptor responder (tazarotene induced) 2    | ENST00000482669 |  | 0,786378416 |
| A_33_P3332287  | XR_109820        | DUX4L9         | double homeobox 4 like 9                                   |                 |  | 0,78549323  |
| A_23_P145024   | NM_000024        | ADRB2          | adrenergic, beta-2-, receptor, surface                     | ENST00000305988 |  | 0,785218093 |
| A_33_P3668839  | NR_036539        | LOC644656      | uncharacterized LOC644656                                  |                 |  | 0,784498353 |
| A_32_P182473   | NM_145233        | ZNF625         | zinc finger protein 625                                    | ENST00000439556 |  | 0,784344147 |
| A_21_P0000283  | NR_002741        | SNORD53        | small nucleolar RNA, C/D box 53                            |                 |  | 0,783801459 |
| A_23_P145024   | NM_000024        | ADRB2          | adrenergic, beta-2-, receptor, surface                     | ENST00000305988 |  | 0,783797208 |
| A_21_P0008120  | TCONS_00021907   | XLOC_010502    |                                                            |                 |  | 0,783447766 |
| A_33_P3415113  | NM_021735        | CLCN6          | chloride channel 6                                         | ENST00000376490 |  | 0,782937777 |

|               |                 |                |                                                             |                 |  |             |
|---------------|-----------------|----------------|-------------------------------------------------------------|-----------------|--|-------------|
| A_21_P0006202 | TCONS_00016119  | XLOC_007506    |                                                             |                 |  | 0,782605883 |
| A_33_P3297020 | NR_026816       | PSORS1C3       | psoriasis susceptibility 1 candidate 3 (non-protein coding) | ENST00000376242 |  | 0,781187882 |
| A_24_P23921   | NM_001080465    | C17orf98       | chromosome 17 open reading frame 98                         | ENST00000398575 |  | 0,780059966 |
| A_23_P145024  | NM_000024       | ADRB2          | adrenergic, beta-2-, receptor, surface                      | ENST00000305988 |  | 0,780015763 |
| A_21_P0002502 | TCONS_00004440  | XLOC_002313    |                                                             |                 |  | 0,779153619 |
| A_23_P145024  | NM_000024       | ADRB2          | adrenergic, beta-2-, receptor, surface                      | ENST00000305988 |  | 0,778802057 |
| A_23_P425967  | NM_175064       | SPDYE1         | speedy homolog E1 (Xenopus laevis)                          | ENST00000258704 |  | 0,778304868 |
| A_21_P0012990 | ENST00000507733 | XLOC_I2_012071 |                                                             | ENST00000507733 |  | 0,77645681  |
| A_33_P3299560 | AK094480        | LEKR1          | leucine, glutamate and lysine rich 1                        |                 |  | 0,776383522 |
| A_21_P0011209 | ENST00000416576 | XLOC_I2_003885 |                                                             | ENST00000416576 |  | 0,776213152 |
| A_21_P0004318 | TCONS_00010148  | XLOC_004615    |                                                             |                 |  | 0,775988305 |
| A_23_P168828  | NM_005655       | KLF10          | Kruppel-like factor 10                                      | ENST00000285407 |  | 0,775824895 |
| A_23_P74162   | NM_018134       | IQCC           | IQ motif containing C                                       | ENST00000537469 |  | 0,775666185 |
| A_32_P202759  | NM_177454       | FAM171B        | family with sequence similarity 171, member B               | ENST00000272804 |  | 0,775282298 |
| A_23_P89589   | NM_002616       | PER1           | period homolog 1 (Drosophila)                               | ENST00000317276 |  | 0,774559673 |
| A_23_P101476  | NM_030824       | ZNF442         | zinc finger protein 442                                     | ENST00000242804 |  | 0,77428529  |
| A_21_P0012805 | NR_038331       | LOC100505545   | uncharacterized LOC100505545                                | ENST00000505848 |  | 0,774266998 |
| A_23_P145024  | NM_000024       | ADRB2          | adrenergic, beta-2-, receptor, surface                      | ENST00000305988 |  | 0,773882536 |
| A_33_P3626709 | AK126613        | LOC100129280   | uncharacterized LOC100129280                                |                 |  | 0,773443025 |
| A_23_P34877   | NM_022768       | RBM15          | RNA binding motif protein 15                                | ENST00000487146 |  | 0,772841063 |
| A_24_P623782  | NM_001005217    | FRG2           | FSHD region gene 2                                          | ENST00000378763 |  | 0,772829649 |
| A_23_P8013    | NM_003519       | HIST1H2BL      | histone cluster 1, H2bl                                     | ENST00000377401 |  | 0,770893131 |
| A_21_P0010675 | NR_029401       | LOC731275      | uncharacterized LOC731275                                   | ENST00000427210 |  | 0,770591574 |
| A_23_P101476  | NM_030824       | ZNF442         | zinc finger protein 442                                     | ENST00000242804 |  | 0,76972418  |
| A_24_P327181  | NM_032387       | WNK4           | WNK lysine deficient protein kinase 4                       | ENST00000246914 |  | 0,769111049 |
| A_23_P415015  | NM_022374       | ATL2           | atlastin GTPase 2                                           | ENST00000546051 |  | 0,768285913 |
| A_21_P0013927 | ENST00000484786 | TRAK1          | trafficking protein, kinesin binding 1                      | ENST00000484786 |  | 0,767168485 |
| A_21_P0000023 | NM_001159749    | RIOK2          | RIO kinase 2 (yeast)                                        | ENST00000508447 |  | 0,766384492 |
| A_21_P0009415 | TCONS_00026158  | XLOC_012572    |                                                             |                 |  | 0,766297473 |



|               |                  |                |                                                              |                 |             |
|---------------|------------------|----------------|--------------------------------------------------------------|-----------------|-------------|
| A_23_P318432  | NM_138295        | PKD1L1         | polycystic kidney disease 1 like 1                           | ENST00000289672 | 0,76622311  |
| A_23_P145024  | NM_000024        | ADRB2          | adrenergic, beta-2-, receptor, surface                       | ENST00000305988 | 0,76595873  |
| A_33_P3305770 | ENST00000389311  | NBR1           | neighbor of BRCA1 gene 1                                     | ENST00000389311 | 0,765925202 |
| A_32_P197825  | NM_001032392     | PLGLB1         | plasminogen-like B1                                          | ENST00000482249 | 0,765559679 |
| A_33_P3227551 | ENST00000509069  | ZNF331         | zinc finger protein 331                                      | ENST00000509069 | 0,765120527 |
| A_33_P3255001 | NR_026834        | LOC152024      | uncharacterized LOC152024                                    | ENST00000432505 | 0,765086138 |
| A_33_P3262292 | NM_015562        | UBXN7          | UBX domain protein 7                                         | ENST00000535858 | 0,765020915 |
| A_23_P398854  | NM_173660        | DOK7           | docking protein 7                                            | ENST00000515886 | 0,764947536 |
| A_33_P3220976 | BC043212         | EFHB           | EF-hand domain family, member B                              | ENST00000474780 | 0,764042772 |
| A_23_P323898  | NR_028077        | ZSCAN12        | zinc finger and SCAN domain containing 12                    | ENST00000396827 | 0,763533272 |
| A_33_P3325723 | NM_001822        | CHN1           | chimerin (chimaerin) 1                                       | ENST00000492964 | 0,763182803 |
| A_23_P114185  | NM_004615        | TSPAN7         | tetraspanin 7                                                | ENST00000422612 | 0,763058517 |
| A_21_P0013593 | TCONS_I2_0002884 | XLOC_I2_014853 |                                                              |                 | 0,76299406  |
| A_21_P0009205 | TCONS_00025256   | XLOC_012590    |                                                              |                 | 0,762923896 |
| A_21_P0013237 | TCONS_I2_0002598 | XLOC_I2_013465 |                                                              |                 | 0,762283834 |
| A_23_P395374  | NM_003539        | HIST1H4D       | histone cluster 1, H4d                                       | ENST00000340756 | 0,761929134 |
| A_33_P3359518 | NM_001085487     | MYSM1          | Myb-like, SWIRM and MPN domains 1                            | ENST00000401044 | 0,758923267 |
| A_24_P926684  | ENST00000503418  | UBE2D3         | ubiquitin-conjugating enzyme E2D 3                           | ENST00000503418 | 0,758622118 |
| A_21_P0011869 | TCONS_I2_0001421 | XLOC_I2_007731 |                                                              |                 | 0,757360192 |
| A_23_P107744  | NM_030760        | S1PR5          | sphingosine-1-phosphate receptor 5                           | ENST00000359134 | 0,756829918 |
| A_21_P0003846 | TCONS_00008868   | XLOC_003636    |                                                              |                 | 0,756616437 |
| A_23_P16817   | NM_004071        | CLK1           | CDC-like kinase 1                                            | ENST00000496205 | 0,756533813 |
| A_23_P106042  | NM_001037288     | CMTM5          | CKLF-like MARVEL transmembrane domain containing 5           | ENST00000553750 | 0,755585362 |
| A_23_P102172  | NM_173077        | CPO            | carboxypeptidase O                                           | ENST00000272852 | 0,754823955 |
| A_23_P115161  | NM_002036        | DARC           | Duffy blood group, chemokine receptor                        | ENST00000435307 | 0,754734278 |
| A_33_P3266410 | NM_002383        | MAZ            | MYC-associated zinc finger protein (purine-binding transcrip | ENST00000545521 | 0,754269181 |
| A_33_P3759737 | NR_037809        | LOC151171      | uncharacterized LOC151171                                    | ENST00000446979 | 0,753806781 |
| A_23_P301328  | ENST00000476313  | PDXK           | pyridoxal (pyridoxine, vitamin B6) kinase                    | ENST00000476313 | 0,753774077 |
| A_33_P3334590 | NM_017762        | MTMR10         | myotubularin related protein 10                              | ENST00000340566 | 0,753403944 |

|                |                  |                |                                                         |                 |  |             |
|----------------|------------------|----------------|---------------------------------------------------------|-----------------|--|-------------|
| A_21_P0008728  | TCONS_00024081   | XLOC_011437    |                                                         |                 |  | 0,752976758 |
| A_21_P0003330  | NR_040108        | LOC728175      | uncharacterized LOC728175                               |                 |  | 0,752944246 |
| A_24_P291658   | NM_000667        | ADH1A          | alcohol dehydrogenase 1A (class I), alpha polypeptide   | ENST00000412614 |  | 0,752716644 |
| A_21_P0010495  | NR_038958        | LOC100507412   | uncharacterized LOC100507412                            |                 |  | 0,752576318 |
| A_33_P3283300  | ENST00000469758  | FAM204A        | family with sequence similarity 204, member A           | ENST00000469758 |  | 0,752423867 |
| A_33_P3343800  | ENST00000443925  | TSSC1          | tumor suppressing subtransferable candidate 1           | ENST00000443925 |  | 0,752369345 |
| A_33_P3349252  | AL512723         | DKFZP547L112   | uncharacterized protein DKFZp547L112                    |                 |  | 0,752055458 |
| A_24_P508103   | NR_026758        | LOC440905      | uncharacterized LOC440905                               | ENST00000456785 |  | 0,751611265 |
| A_33_P3380762  | NR_027120        | HSD52          | uncharacterized LOC729467                               |                 |  | 0,751158061 |
| A_21_P0013266  | BQ926105         | XLOC_I2_013594 |                                                         |                 |  | 0,750909521 |
| A_33_P3390092  | NR_038948        | LOC100506136   | uncharacterized LOC100506136                            |                 |  | 0,750743676 |
| A_23_P331770   | NM_018561        | USP49          | ubiquitin specific peptidase 49                         | ENST00000297229 |  | 0,750476313 |
| A_21_P0004742  | ENST00000456103  | XLOC_005663    |                                                         | ENST00000456103 |  | 0,750191562 |
| A_23_P27636    | NM_144566        | ZNF700         | zinc finger protein 700                                 | ENST00000254321 |  | 0,749856662 |
| A_23_P135730   | NM_145295        | ZNF627         | zinc finger protein 627                                 | ENST00000361113 |  | 0,749713739 |
| A_23_P85209    | NM_000640        | IL13RA2        | interleukin 13 receptor, alpha 2                        | ENST00000243213 |  | 0,749319766 |
| A_21_P0012527  | ENST00000411596  | XLOC_I2_010083 |                                                         | ENST00000411596 |  | 0,748438915 |
| A_23_P364324   | NM_152701        | ABCA13         | ATP-binding cassette, sub-family A (ABC1), member 13    | ENST00000435803 |  | 0,74826124  |
| A_21_P0013308  | TCONS_I2_0002659 | XLOC_I2_013846 |                                                         |                 |  | 0,747886772 |
| A_33_P3346327  | NR_003674        | KGFLP1         | fibroblast growth factor 7 pseudogene                   | ENST00000377614 |  | 0,747468602 |
| A_23_P109785   | NM_003889        | NR1I2          | nuclear receptor subfamily 1, group I, member 2         | ENST00000493757 |  | 0,747417964 |
| A_23_P115805   | NM_001143764     | SYCE1          | synaptonemal complex central element protein 1          | ENST00000460441 |  | 0,746793905 |
| A_33_P3229083  | NM_080593        | HIST1H2BK      | histone cluster 1, H2bk                                 | ENST00000356950 |  | 0,745588943 |
| A_23_P30254    | NM_006622        | PLK2           | polo-like kinase 2                                      | ENST00000502671 |  | 0,745412913 |
| A_33_P3361811  | NM_024561        | NAA16          | N(alpha)-acetyltransferase 16, NatA auxiliary subunit   | ENST00000379367 |  | 0,745178156 |
| A_21_P0004917  | TCONS_00011912   | XLOC_005413    |                                                         |                 |  | 0,74507284  |
| A_19_P00809548 | NR_026999        | LINC00265      | long intergenic non-protein coding RNA 265              |                 |  | 0,745054549 |
| A_33_P3271105  | NM_001135654     | PABPC4         | poly(A) binding protein, cytoplasmic 4 (inducible form) | ENST00000531243 |  | 0,74471959  |
| A_21_P0005543  | TCONS_00014010   | XLOC_006657    |                                                         |                 |  | 0,744683494 |

|                |                 |                |                                                             |                 |             |
|----------------|-----------------|----------------|-------------------------------------------------------------|-----------------|-------------|
| A_33_P3211268  | ENST00000334588 | GPATCH4        | G patch domain containing 4                                 | ENST00000334588 | 0,744531738 |
| A_23_P403081   | NM_198566       | C5orf34        | chromosome 5 open reading frame 34                          | ENST00000506213 | 0,744234934 |
| A_33_P3233843  | NM_001190981    | IL6ST          | interleukin 6 signal transducer (gp130, oncostatin M recept | ENST00000542298 | 0,742873085 |
| A_21_P0002298  | ENST00000449714 | XLOC_001703    |                                                             | ENST00000449714 | 0,74216808  |
| A_23_P93602    | NM_001010905    | C6orf58        | chromosome 6 open reading frame 58                          | ENST00000329722 | 0,741600263 |
| A_19_P00810043 | XR_108650       | FLJ38717       | FLJ38717 protein                                            |                 | 0,741215575 |
| A_21_P0008164  | TCONS_00022023  | XLOC_010617    |                                                             |                 | 0,740153081 |
| A_21_P0012541  | XR_109995       | LOC285286      | uncharacterized LOC285286                                   |                 | 0,739819566 |
| A_33_P3375467  | NM_177483       | GPLD1          | glycosylphosphatidylinositol specific phospholipase D1      | ENST00000475417 | 0,739292132 |
| A_23_P114626   | NM_000488       | SERPINC1       | serpin peptidase inhibitor, clade C (antithrombin), member  | ENST00000351522 | 0,739196605 |
| A_24_P314585   | NM_181532       | ERAS           | ES cell expressed Ras                                       | ENST00000338270 | 0,738323162 |
| A_21_P0003081  | TCONS_00006354  | XLOC_002975    |                                                             |                 | 0,737342132 |
| A_33_P3381022  | ENST00000362035 | ICMT           | isoprenylcysteine carboxyl methyltransferase                | ENST00000362035 | 0,736827808 |
| A_33_P3373165  | NM_001177376    | DUX4L4         | double homeobox 4 like 4                                    | ENST00000538692 | 0,736744797 |
| A_32_P205944   | NM_005054       | RGPD5          | RANBP2-like and GRIP domain containing 5                    | ENST00000302558 | 0,735999902 |
| A_23_P145024   | NM_000024       | ADRB2          | adrenergic, beta-2-, receptor, surface                      | ENST00000305988 | 0,735939412 |
| A_23_P101476   | NM_030824       | ZNF442         | zinc finger protein 442                                     | ENST00000242804 | 0,735566686 |
| A_23_P80162    | NM_032405       | TMPRSS3        | transmembrane protease, serine 3                            | ENST00000478680 | 0,735521731 |
| A_21_P0003179  | TCONS_00006667  | XLOC_003263    |                                                             |                 | 0,734509605 |
| A_21_P0001010  | TCONS_00000293  | XLOC_000377    |                                                             |                 | 0,734446338 |
| A_21_P0007689  | THC2730876      | XLOC_010023    |                                                             |                 | 0,734365466 |
| A_23_P45913    | NM_004814       | SNRNP40        | small nuclear ribonucleoprotein 40kDa (U5)                  | ENST00000474025 | 0,734032587 |
| A_23_P145024   | NM_000024       | ADRB2          | adrenergic, beta-2-, receptor, surface                      | ENST00000305988 | 0,733656089 |
| A_21_P0011501  | ENST00000446912 | XLOC_I2_005350 |                                                             | ENST00000446912 | 0,733455475 |
| A_33_P3671291  | AA378382        | SNORA12        | small nucleolar RNA, H/ACA box 12                           |                 | 0,733425741 |
| A_24_P941166   | NM_001001661    | ZNF425         | zinc finger protein 425                                     | ENST00000378061 | 0,732904378 |
| A_21_P0001345  | AK094796        | LOC729970      | hCG2028352-like                                             |                 | 0,732077729 |
| A_21_P0003868  | THC2648791      | XLOC_003807    |                                                             |                 | 0,732007958 |
| A_23_P55388    | NM_018143       | KLHL11         | kelch-like 11 (Drosophila)                                  | ENST00000540254 | 0,731840508 |

|                |                  |                |                                                        |                 |             |
|----------------|------------------|----------------|--------------------------------------------------------|-----------------|-------------|
| A_32_P187663   | NM_001042416     | ZNF596         | zinc finger protein 596                                | ENST00000320552 | 0,730094872 |
| A_23_P39263    | NM_173480        | ZNF57          | zinc finger protein 57                                 | ENST00000395204 | 0,729946337 |
| A_21_P0013233  | AK126699         | INTS4L2        | integrator complex subunit 4-like 2                    |                 | 0,729775365 |
| A_23_P145024   | NM_000024        | ADRB2          | adrenergic, beta-2-, receptor, surface                 | ENST00000305988 | 0,729709513 |
| A_33_P3258467  | NM_178313        | SPTBN1         | spectrin, beta, non-erythrocytic 1                     | ENST00000333896 | 0,729363255 |
| A_23_P426835   | AL834536         | LOC729652      | uncharacterized LOC729652                              |                 | 0,729266352 |
| A_21_P0003812  | TCONS_00008689   | XLOC_004205    |                                                        |                 | 0,728765028 |
| A_33_P3411328  | NR_034151        | LOC730227      | uncharacterized LOC730227                              |                 | 0,728718031 |
| A_21_P0005566  | TCONS_00014160   | XLOC_006138    |                                                        |                 | 0,728622903 |
| A_33_P3322230  | AK056507         | FLJ31945       | uncharacterized LOC440137                              |                 | 0,72808851  |
| A_33_P3424328  | ENST00000229824  | RAB44          | RAB44, member RAS oncogene family                      | ENST00000229824 | 0,728054981 |
| A_23_P388150   | NM_032562        | PLA2G12B       | phospholipase A2, group XIIB                           | ENST00000373032 | 0,72796061  |
| A_21_P0013351  | TCONS_I2_0002692 | XLOC_I2_014024 |                                                        |                 | 0,727648997 |
| A_21_P0011029  | NR_029401        | LOC731275      | uncharacterized LOC731275                              | ENST00000435840 | 0,72749841  |
| A_24_P109082   | NM_020935        | USP37          | ubiquitin specific peptidase 37                        | ENST00000258399 | 0,727451243 |
| A_33_P3552465  | ENST00000463067  | ZNF852         | zinc finger protein 852                                | ENST00000463067 | 0,727135237 |
| A_21_P0013783  | TCONS_I2_0003030 | XLOC_I2_015585 |                                                        |                 | 0,72680627  |
| A_21_P0001786  | ENST00000413792  | XLOC_002049    |                                                        | ENST00000413792 | 0,726678821 |
| A_21_P0014070  | ENST00000444037  | LOC100506855   |                                                        | ENST00000444037 | 0,726241805 |
| A_33_P3703637  | AK095655         | LOC285300      | uncharacterized LOC285300                              |                 | 0,724814025 |
| A_33_P3374987  | NM_198571        | C7orf52        | chromosome 7 open reading frame 52                     | ENST00000300303 | 0,724683791 |
| A_33_P3343010  | ENST00000406925  | C15orf63       | chromosome 15 open reading frame 63                    | ENST00000406925 | 0,724649449 |
| A_19_P00315826 | EF413001         | XLOC_001148    |                                                        |                 | 0,724312944 |
| A_33_P3245484  | AK124361         | LOC100131000   | uncharacterized LOC100131000                           |                 | 0,724050744 |
| A_33_P3335895  | NM_001242376     | GFAP           | glial fibrillary acidic protein                        | ENST00000435360 | 0,723146028 |
| A_21_P0013069  | NR_003504        | GUSBP2         | glucuronidase, beta pseudogene 2                       | ENST00000466668 | 0,722779542 |
| A_23_P252855   | NM_018321        | BRX1           | BRX1, biogenesis of ribosomes, homolog (S. cerevisiae) | ENST00000506023 | 0,72277357  |
| A_23_P107744   | NM_030760        | S1PR5          | sphingosine-1-phosphate receptor 5                     | ENST00000359134 | 0,722527424 |
| A_33_P3316310  | NM_182501        | MTERFD2        | MTERF domain containing 2                              | ENST00000475860 | 0,721575672 |

|                |                   |                |                                                               |                 |             |
|----------------|-------------------|----------------|---------------------------------------------------------------|-----------------|-------------|
| A_23_P10206    | NM_005328         | HAS2           | hyaluronan synthase 2                                         | ENST00000303924 | 0,721552317 |
| A_21_P0000118  | NM_001193283      | LEKR1          | leucine, glutamate and lysine rich 1                          | ENST00000491763 | 0,720652489 |
| A_19_P00317016 | THC2573057        | XLOC_006037    |                                                               |                 | 0,720628065 |
| A_21_P0000303  | NR_002921         | SNORA75        | small nucleolar RNA, H/ACA box 75                             |                 | 0,720530779 |
| A_23_P20480    | NM_018310         | BRF2           | BRF2, subunit of RNA polymerase III transcription initiation  | ENST00000220659 | 0,720419207 |
| A_21_P0009677  | TCONS_00026870    | XLOC_012922    |                                                               |                 | 0,720309273 |
| A_19_P00322847 | NR_037178         | LOC100294145   | uncharacterized LOC100294145                                  |                 | 0,720271015 |
| A_21_P0004866  | NR_026775         | LINC00240      | long intergenic non-protein coding RNA 240                    | ENST00000503488 | 0,720013507 |
| A_24_P85942    | NM_181453         | GCC2           | GRIP and coiled-coil domain containing 2                      | ENST00000309863 | 0,718554241 |
| A_33_P3388636  | AK097925          | FLJ40606       | uncharacterized LOC643549                                     |                 | 0,718551934 |
| A_23_P389897   | NM_002507         | NGFR           | nerve growth factor receptor                                  | ENST00000172229 | 0,718478227 |
| A_23_P319565   | NM_170753         | PGBD3          | piggyBac transposable element derived 3                       | ENST00000508005 | 0,71839499  |
| A_21_P0009859  | ENST00000450473   | XLOC_013571    |                                                               | ENST00000450473 | 0,718235392 |
| A_23_P341700   | NM_001007101      | ZNF484         | zinc finger protein 484                                       | ENST00000375495 | 0,717976659 |
| A_23_P315964   | NM_173568         | UMODL1         | uromodulin-like 1                                             | ENST00000400427 | 0,717232736 |
| A_33_P3416142  | EF413001          | LOC100131234   | familial acute myelogenous leukemia related factor            |                 | 0,717023326 |
| A_21_P0002417  | TCONS_00004194    | XLOC_002041    |                                                               |                 | 0,716238486 |
| A_21_P0001938  | NR_038897         | LOC285084      | uncharacterized LOC285084                                     |                 | 0,715507605 |
| A_33_P3224795  | NM_022466         | IKZF5          | IKAROS family zinc finger 5 (Pegasus)                         | ENST00000368886 | 0,715495819 |
| A_23_P349463   | NM_022097         | CHP2           | calcineurin B homologous protein 2                            | ENST00000300113 | 0,714798908 |
| A_23_P26386    | NM_016140         | TPPP3          | tubulin polymerization-promoting protein family member 3      | ENST00000290942 | 0,714616127 |
| A_21_P0006058  | ENST00000439014   | XLOC_007586    |                                                               | ENST00000439014 | 0,714230713 |
| A_23_P160004   | NM_182660         | UTY            | ubiquitously transcribed tetratricopeptide repeat gene, Y-lir | ENST00000545955 | 0,712129222 |
| A_21_P0013328  | TCONS_I2_0002666: | XLOC_I2_013873 |                                                               |                 | 0,711802367 |
| A_33_P3229067  | NM_003520         | HIST1H2BN      | histone cluster 1, H2bn                                       | ENST00000396980 | 0,710943493 |
| A_21_P0006005  | ENST00000431981   | XLOC_007339    |                                                               | ENST00000431981 | 0,710846265 |
| A_23_P347610   | NM_012206         | HAVCR1         | hepatitis A virus cellular receptor 1                         | ENST00000425854 | 0,710251987 |
| A_33_P3342967  | AK128204          | LOC100129186   | uncharacterized LOC100129186                                  |                 | 0,709621501 |
| A_33_P3249654  | NR_038865         | C19orf29-AS1   | C19orf29 antisense RNA 1 (non-protein coding)                 | ENST00000447295 | 0,709569537 |

|               |                                 |                |                                                             |                 |             |
|---------------|---------------------------------|----------------|-------------------------------------------------------------|-----------------|-------------|
| A_33_P3327010 | NM_015112                       | MAST2          | microtubule associated serine/threonine kinase 2            | ENST00000372008 | 0,709245267 |
| A_24_P80532   | NM_004354                       | CCNG2          | cyclin G2                                                   | ENST00000354403 | 0,709102974 |
| A_33_P3284858 | AK093299                        | LOC729867      | uncharacterized LOC729867                                   |                 | 0,708883623 |
| A_33_P3233834 | NM_001190981                    | IL6ST          | interleukin 6 signal transducer (gp130, oncostatin M recept | ENST00000542298 | 0,708166182 |
| A_33_P3284108 | NM_006178                       | NSF            | N-ethylmaleimide-sensitive factor                           | ENST00000225282 | 0,708136562 |
| A_21_P0011092 | TCONS_I2_0000613:XLOC_I2_003295 |                |                                                             |                 | 0,707710897 |
| A_21_P0010654 | NM_001161334                    | HIST2H2BF      | histone cluster 2, H2bf                                     | ENST00000369167 | 0,707457781 |
| A_23_P114626  | NM_000488                       | SERPINC1       | serpin peptidase inhibitor, clade C (antithrombin), member  | ENST00000351522 | 0,707013168 |
| A_21_P0014784 | XR_132566                       | LOC100289607   | heat shock 10kDa protein 1 (chaperonin 10) pseudogene       |                 | 0,706962091 |
| A_23_P131348  | NM_025264                       | THUMPD2        | THUMP domain containing 2                                   | ENST00000530095 | 0,706102783 |
| A_21_P0011465 | NM_015092                       | SMG1           | smg-1 homolog, phosphatidylinositol 3-kinase-related kinas  | ENST00000447140 | 0,705998356 |
| A_33_P3420020 | NM_001130858                    | PPIP5K1        | diphosphoinositol pentakisphosphate kinase 1                | ENST00000335092 | 0,705818735 |
| A_21_P0013091 | TCONS_I2_0002491:XLOC_I2_013116 |                |                                                             |                 | 0,705181516 |
| A_21_P0010235 | TCONS_00029002                  | XLOC_013917    |                                                             |                 | 0,704756917 |
| A_33_P3401459 | NM_020971                       | SPTBN4         | spectrin, beta, non-erythrocytic 4                          | ENST00000344104 | 0,704278953 |
| A_33_P3259662 | NM_003435                       | ZNF134         | zinc finger protein 134                                     | ENST00000396161 | 0,703827328 |
| A_33_P3356035 | ENST00000440812                 | SMG7           | smg-7 homolog, nonsense mediated mRNA decay factor (C.      | ENST00000440812 | 0,703276601 |
| A_23_P412389  | NM_003862                       | FGF18          | fibroblast growth factor 18                                 | ENST00000274625 | 0,70282452  |
| A_21_P0007790 | THC2671543                      | XLOC_010245    |                                                             |                 | 0,702474594 |
| A_21_P0005578 | TCONS_00014218                  | XLOC_006259    |                                                             |                 | 0,702317944 |
| A_32_P226205  | NM_033400                       | ZFHX2          | zinc finger homeobox 2                                      |                 | 0,702259672 |
| A_21_P0013782 | TCONS_I2_0003030:XLOC_I2_015585 |                |                                                             |                 | 0,702222794 |
| A_33_P3344127 | NM_003512                       | HIST1H2AC      | histone cluster 1, H2ac                                     | ENST00000377791 | 0,701986938 |
| A_21_P0010636 | TCONS_I2_0000139,XLOC_I2_001011 |                |                                                             |                 | 0,701876109 |
| A_21_P0002967 | ENST00000481004                 | XLOC_002688    |                                                             | ENST00000481004 | 0,701041784 |
| A_33_P3210521 | ENST00000381090                 | C2orf43        | chromosome 2 open reading frame 43                          | ENST00000381090 | 0,700326786 |
| A_21_P0011876 | THC2707941                      | XLOC_I2_007783 |                                                             |                 | 0,700091998 |
| A_21_P0013397 | ENST00000425880                 | XLOC_I2_013529 |                                                             | ENST00000425880 | 0,699024287 |
| A_23_P81859   | NM_080596                       | HIST1H2AH      | histone cluster 1, H2ah                                     | ENST00000377459 | 0,698861799 |



|                |                  |                |                                                        |                 |             |
|----------------|------------------|----------------|--------------------------------------------------------|-----------------|-------------|
| A_33_P3387455  | NM_001029880     | SFMBT2         | Scm-like with four mbt domains 2                       | ENST00000379711 | 0,698797449 |
| A_21_P0010591  | TCONS_I2_0000096 | XLOC_I2_000727 |                                                        |                 | 0,69833409  |
| A_21_P0010618  | BX113442         | XLOC_I2_000941 |                                                        |                 | 0,697925825 |
| A_21_P0000898  | NR_040073        | LOC100131234   | familial acute myelogenous leukemia related factor     |                 | 0,697892726 |
| A_23_P50735    | NM_001029997     | ZNF181         | zinc finger protein 181                                | ENST00000492450 | 0,696342171 |
| A_33_P3211633  | NM_006784        | WDR3           | WD repeat domain 3                                     | ENST00000369441 | 0,695827498 |
| A_21_P0002647  | THC2564285       | XLOC_001974    |                                                        |                 | 0,695040013 |
| A_21_P0006941  | TCONS_00018396   | XLOC_008678    |                                                        |                 | 0,694543901 |
| A_19_P00810899 | NR_027058        | LINC00338      | long intergenic non-protein coding RNA 338             | ENST00000434411 | 0,694355324 |
| A_33_P3375528  | NM_152622        | MIER3          | mesoderm induction early response 1, family member 3   | ENST00000451637 | 0,694291011 |
| A_33_P3397658  | ENST00000394243  | SYNPO          | synaptopodin                                           | ENST00000394243 | 0,69417161  |
| A_23_P213319   | NM_197941        | ADAMTS6        | ADAM metallopeptidase with thrombospondin type 1 motif | ENST00000381052 | 0,693089811 |
| A_33_P3216319  | NM_015144        | ZCCHC14        | zinc finger, CCHC domain containing 14                 | ENST00000268616 | 0,692456038 |
| A_32_P64200    | NM_002098        | GUCA1B         | guanylate cyclase activator 1B (retina)                |                 | 0,691909793 |
| A_33_P3407434  | XM_003403686     | LOC100653224   | uncharacterized LOC100653224                           | ENST00000412403 | 0,691459541 |
| A_21_P0010546  | BX090733         | XLOC_I2_000354 |                                                        |                 | 0,691374847 |
| A_21_P0011317  | TCONS_I2_0000860 | XLOC_I2_004640 |                                                        |                 | 0,690662772 |
| A_32_P177040   | NM_001099435     | SPDYE5         | speedy homolog E5 (Xenopus laevis)                     | ENST00000426970 | 0,690380011 |
| A_33_P3374035  | AK094630         | PDXK           | pyridoxal (pyridoxine, vitamin B6) kinase              |                 | 0,690168584 |
| A_33_P3239654  | AK056727         | HCG4B          | HLA complex group 4B (non-protein coding)              |                 | 0,68971838  |
| A_23_P368909   | NR_027701        | LINC00346      | long intergenic non-protein coding RNA 346             | ENST00000538077 | 0,689609302 |
| A_24_P16950    | NM_198893        | ZNF160         | zinc finger protein 160                                | ENST00000429604 | 0,689374598 |
| A_21_P0000492  | NR_004384        | SNAR-F         | small ILF3/NF90-associated RNA F                       |                 | 0,68909464  |
| A_21_P0006112  | ENST00000417135  | XLOC_007884    |                                                        | ENST00000417135 | 0,687800549 |
| A_23_P110957   | NM_001452        | FOXF2          | forkhead box F2                                        | ENST00000259806 | 0,687270277 |
| A_23_P325661   | NM_003435        | ZNF134         | zinc finger protein 134                                | ENST00000396161 | 0,686855903 |
| A_23_P355439   | NM_170745        | HIST1H2AA      | histone cluster 1, H2aa                                | ENST00000297012 | 0,686700967 |
| A_21_P0005590  | TCONS_00014242   | XLOC_006319    |                                                        |                 | 0,686641321 |
| A_23_P109785   | NM_003889        | NR1I2          | nuclear receptor subfamily 1, group I, member 2        | ENST00000493757 | 0,685826254 |

|                |                 |                |                                                             |                 |             |
|----------------|-----------------|----------------|-------------------------------------------------------------|-----------------|-------------|
| A_21_P0005492  | THC2525265      | XLOC_006416    |                                                             |                 | 0,685716577 |
| A_23_P416751   | NM_173530       | ZNF610         | zinc finger protein 610                                     | ENST00000403906 | 0,684838519 |
| A_33_P3374997  | NR_027035       | LOC144486      | uncharacterized LOC144486                                   |                 | 0,684056468 |
| A_23_P323943   | NM_178498       | SLC5A12        | solute carrier family 5 (sodium/glucose cotransporter), mem | ENST00000280467 | 0,683758202 |
| A_21_P0006907  | TCONS_00018328  | XLOC_008608    |                                                             |                 | 0,683199947 |
| A_23_P168864   | NM_001029976    | ZNF16          | zinc finger protein 16                                      | ENST00000394909 | 0,683168676 |
| A_23_P167194   | NM_001812       | CENPC1         | centromere protein C 1                                      | ENST00000506882 | 0,683123888 |
| A_23_P63870    | NM_144660       | SAMD8          | sterile alpha motif domain containing 8                     | ENST00000372690 | 0,682718599 |
| A_23_P128698   | NM_005842       | SPRY2          | sprouty homolog 2 (Drosophila)                              | ENST00000541655 | 0,682646643 |
| A_24_P132813   | NM_001040103    | OPALIN         | oligodendrocytic myelin paranodal and inner loop protein    | ENST00000419479 | 0,682447667 |
| A_19_P00318726 | NR_034007       | LOC339894      | uncharacterized LOC339894                                   | ENST00000471357 | 0,682148788 |
| A_23_P22647    | NM_015686       | FAM155B        | family with sequence similarity 155, member B               | ENST00000252338 | 0,681664622 |
| A_21_P0006033  | BC031969        | XLOC_007466    |                                                             |                 | 0,681624989 |
| A_33_P3226212  | NM_021219       | JAM2           | junctional adhesion molecule 2                              | ENST00000312957 | 0,680836929 |
| A_21_P0012506  | ENST00000489690 | XLOC_l2_009940 |                                                             | ENST00000489690 | 0,680756825 |
| A_21_P0009657  | AK131520        | XLOC_013348    |                                                             |                 | 0,680512622 |
| A_21_P0009088  | TCONS_00024776  | XLOC_012051    |                                                             |                 | 0,679716822 |
| A_21_P0010302  | BM671314        | XLOC_014119    |                                                             |                 | 0,679557703 |
| A_21_P0013850  | NR_028407       | ARMCX4         | armadillo repeat containing, X-linked 4                     | ENST00000455331 | 0,679282642 |
| A_21_P0005219  | ENST00000442800 | XLOC_006035    |                                                             | ENST00000442800 | 0,679150458 |
| A_21_P0010875  | THC2533495      | XLOC_l2_001967 |                                                             |                 | 0,679105155 |
| A_21_P0007695  | TCONS_00020749  | XLOC_010037    |                                                             |                 | 0,67868475  |
| A_21_P0006168  | TCONS_00016040  | XLOC_007437    |                                                             |                 | 0,678404782 |
| A_33_P3408711  | NM_001456       | FLNA           | filamin A, alpha                                            | ENST00000369852 | 0,678318056 |
| A_33_P3323347  | NM_152475       | ZNF417         | zinc finger protein 417                                     | ENST00000312026 | 0,678226116 |
| A_33_P3232532  | NM_025191       | EDEM3          | ER degradation enhancer, mannosidase alpha-like 3           | ENST00000367512 | 0,678072031 |
| A_33_P3382856  | NM_133507       | DCN            | decorin                                                     | ENST00000456569 | 0,677969884 |
| A_21_P0000155  | NM_001204453    | PSMC2          | proteasome (prosome, macropain) 26S subunit, ATPase, 2      | ENST00000460021 | 0,677765046 |
| A_23_P216038   | NM_032205       | PHF20L1        | PHD finger protein 20-like 1                                | ENST00000315808 | 0,67758243  |

|                |                  |                |                                                 |                 |             |
|----------------|------------------|----------------|-------------------------------------------------|-----------------|-------------|
| A_21_P0000247  | NR_002443        | SNORD18C       | small nucleolar RNA, C/D box 18C                |                 | 0,677395741 |
| A_23_P166823   | NM_003280        | TNNC1          | troponin C type 1 (slow)                        | ENST00000461086 | 0,677252697 |
| A_33_P3249976  | NM_021219        | JAM2           | junctional adhesion molecule 2                  | ENST00000400535 | 0,676580295 |
| A_19_P00322983 | THC2573057       | XLOC_006037    |                                                 |                 | 0,676293368 |
| A_21_P0000904  | NR_040112        | A2MP1          | alpha-2-macroglobulin pseudogene 1              | ENST00000543404 | 0,676282831 |
| A_33_P3349774  | NM_144703        | LSM14B         | LSM14B, SCD6 homolog B ( <i>S. cerevisiae</i> ) | ENST00000370906 | 0,67585006  |
| A_33_P3220390  | BC028180         | WTAP           | Wilms tumor 1 associated protein                |                 | 0,675736497 |
| A_23_P83149    | NM_016014        | FAM108B1       | family with sequence similarity 108, member B1  | ENST00000377041 | 0,675637885 |
| A_24_P177568   | NM_133473        | ZNF431         | zinc finger protein 431                         | ENST00000311048 | 0,675629902 |
| A_24_P410721   | NM_001144954     | C5orf47        | chromosome 5 open reading frame 47              | ENST00000340147 | 0,675049734 |
| A_33_P3345608  | NM_001202438     | C10orf137      | chromosome 10 open reading frame 137            | ENST00000392732 | 0,674884897 |
| A_24_P86389    | NM_003514        | HIST1H2AM      | histone cluster 1, H2am                         | ENST00000359611 | 0,674571272 |
| A_21_P0005979  | ENST00000521804  | SLC45A4        | solute carrier family 45, member 4              | ENST00000521804 | 0,674534587 |
| A_23_P111041   | NM_003525        | HIST1H2BI      | histone cluster 1, H2bi                         | ENST00000377733 | 0,674486881 |
| A_24_P272160   | ENST00000296147  | NBEAL2         | neurobeachin-like 2                             | ENST00000296147 | 0,674359252 |
| A_32_P220463   | NR_024356        | FBLL1          | fibrillarin-like 1                              |                 | 0,674112075 |
| A_21_P0010674  | TCONS_I2_0000180 | XLOC_I2_001332 |                                                 |                 | 0,674069541 |
| A_33_P3272808  | NM_017952        | PTCD3          | Pentatricopeptide repeat domain 3               | ENST00000254630 | 0,673244192 |
| A_24_P121846   | NM_003433        | ZNF132         | zinc finger protein 132                         | ENST00000391695 | 0,673137441 |
| A_21_P0006047  | ENST00000456032  | XLOC_007540    |                                                 | ENST00000456032 | 0,672944752 |
| A_21_P0005524  | TCONS_00013938   | XLOC_006578    |                                                 |                 | 0,672859628 |
| A_21_P0013415  | ENST00000418442  | XLOC_I2_013734 |                                                 | ENST00000418442 | 0,672595776 |
| A_33_P3212769  | BC020894         | LOC100132686   | uncharacterized LOC100132686                    |                 | 0,672514064 |
| A_21_P0006532  | TCONS_00017313   | XLOC_008149    |                                                 |                 | 0,671746529 |
| A_33_P3337144  | NM_001033723     | ZNF704         | zinc finger protein 704                         | ENST00000327835 | 0,671701788 |
| A_21_P0014261  | XR_109038        | LOC100507128   | uncharacterized LOC100507128                    |                 | 0,670891323 |
| A_21_P0011877  | XR_112441        | LOC100507800   | uncharacterized LOC100507800                    |                 | 0,67029543  |
| A_21_P0009009  | XM_003118689     | LOC400499      | uncharacterized LOC400499                       |                 | 0,669883274 |
| A_21_P0003759  | TCONS_00008555   | XLOC_004053    |                                                 |                 | 0,669855232 |

|               |                 |                |                                                          |                 |             |
|---------------|-----------------|----------------|----------------------------------------------------------|-----------------|-------------|
| A_24_P382287  | NM_004361       | CDH7           | cadherin 7, type 2                                       | ENST00000397968 | 0,66967126  |
| A_33_P3232624 | NR_033908       | LOC100288069   | general transcription factor Ili pseudogene              | ENST00000446912 | 0,668570995 |
| A_23_P108932  | NR_002229       | RPL23AP32      | ribosomal protein L23a pseudogene 32                     |                 | 0,668281952 |
| A_21_P0013793 | NM_014675       | CROCC          | ciliary rootlet coiled-coil, rootletin                   | ENST00000467715 | 0,667858976 |
| A_21_P0013779 | ENST00000455331 | XLOC_I2_015578 |                                                          | ENST00000455331 | 0,66746241  |
| A_21_P0006590 | ENST00000425031 | XLOC_008276    |                                                          | ENST00000425031 | 0,666069627 |
| A_23_P46725   | NM_025209       | EPC1           | enhancer of polycomb homolog 1 (Drosophila)              | ENST00000263062 | 0,666062095 |
| A_24_P22981   | NM_021047       | ZNF253         | zinc finger protein 253                                  | ENST00000355650 | 0,665893902 |
| A_33_P3353692 | NM_002473       | MYH9           | myosin, heavy chain 9, non-muscle                        | ENST00000463027 | 0,665848263 |
| A_21_P0004793 | ENST00000436953 | XLOC_005883    |                                                          | ENST00000436953 | 0,665536117 |
| A_21_P0000337 | NR_002983       | SNORA55        | small nucleolar RNA, H/ACA box 55                        |                 | 0,665236769 |
| A_21_P0001416 | TCONS_00001266  | XLOC_000555    |                                                          |                 | 0,664948996 |
| A_23_P18913   | NM_206880       | OR2V2          | olfactory receptor, family 2, subfamily V, member 2      | ENST00000328275 | 0,664750695 |
| A_23_P211079  | NM_005806       | OLIG2          | oligodendrocyte lineage transcription factor 2           | ENST00000333337 | 0,664548886 |
| A_33_P3259878 | ENST00000545894 | DDB1           | damage-specific DNA binding protein 1, 127kDa            | ENST00000545894 | 0,664417407 |
| A_23_P6818    | NM_020163       | SEMA3G         | sema domain, immunoglobulin domain (Ig), short basic don | ENST00000231721 | 0,664365282 |
| A_21_P0000511 | NR_024342       | SNAR-H         | small ILF3/NF90-associated RNA H                         |                 | 0,663925649 |
| A_21_P0006767 | ENST00000451946 | XLOC_008838    |                                                          | ENST00000451946 | 0,663632536 |
| A_24_P23445   | NR_029422       | RNU12          | RNA, U12 small nuclear                                   |                 | 0,662866686 |
| A_33_P3405888 | AF130105        | LOC100133130   | PRO1102                                                  |                 | 0,662778195 |
| A_33_P3235147 | NM_005221       | DLX5           | distal-less homeobox 5                                   | ENST00000222598 | 0,662612242 |
| A_21_P0014018 | XM_003403487    | LOC100652736   | uncharacterized protein LOC100652736                     |                 | 0,661148999 |
| A_21_P0011875 | XR_108436       | LOC440934      | uncharacterized LOC440934                                |                 | 0,661085246 |
| A_33_P3335984 | BC132927        | FLJ39653       | uncharacterized FLJ39653                                 |                 | 0,661010876 |
| A_33_P3416127 | AK093799        | LOC100132800   | uncharacterized LOC100132800                             |                 | 0,66049062  |
| A_23_P89302   | NM_000727       | CACNG1         | calcium channel, voltage-dependent, gamma subunit 1      | ENST00000226021 | 0,660251487 |
| A_21_P0004672 | ENST00000424162 | XLOC_005413    |                                                          | ENST00000424162 | 0,659980659 |
| A_32_P34003   | ENST00000333129 | FIGN           | fidgetin                                                 | ENST00000333129 | 0,659791125 |
| A_21_P0000254 | NR_002560       | SNORD31        | small nucleolar RNA, C/D box 31                          |                 | 0,659732164 |

|                |                 |                |                                                              |                 |             |
|----------------|-----------------|----------------|--------------------------------------------------------------|-----------------|-------------|
| A_21_P0005255  | ENST00000446053 | XLOC_006220    |                                                              | ENST00000446053 | 0,659482131 |
| A_21_P0004259  | ENST00000520762 | XLOC_004412    |                                                              | ENST00000520762 | 0,659478745 |
| A_23_P152995   | NM_001045       | SLC6A4         | solute carrier family 6 (neurotransmitter transporter, serot | ENST00000261707 | 0,658932082 |
| A_24_P208737   | NR_004431       | GHRLOS         | ghrelin opposite strand/antisense RNA (non-protein coding)   | ENST00000439539 | 0,658659867 |
| A_33_P3421520  | NM_022466       | IKZF5          | IKAROS family zinc finger 5 (Pegasus)                        | ENST00000368886 | 0,658348002 |
| A_21_P0008876  | BC040927        | XLOC_011801    |                                                              |                 | 0,657921872 |
| A_23_P423074   | NM_015566       | FAM169A        | family with sequence similarity 169, member A                | ENST00000510609 | 0,657595136 |
| A_23_P16022    | NM_005773       | ZNF256         | zinc finger protein 256                                      | ENST00000282308 | 0,657281814 |
| A_21_P0012875  | CR745775        | XLOC_I2_011885 |                                                              |                 | 0,656968523 |
| A_23_P10995    | NM_014483       | RBMS3          | RNA binding motif, single stranded interacting protein 3     | ENST00000497319 | 0,656840684 |
| A_23_P411922   | NM_001031698    | PRPF40B        | PRP40 pre-mRNA processing factor 40 homolog B (S. cerevi     | ENST00000261897 | 0,656568621 |
| A_33_P3221443  | NM_203282       | ZNF254         | zinc finger protein 254                                      | ENST00000357002 | 0,656212821 |
| A_33_P3398074  | AF132201        | LOC100133319   | PRO1804                                                      |                 | 0,655962254 |
| A_23_P28012    | NM_033196       | ZNF682         | zinc finger protein 682                                      | ENST00000358523 | 0,655695647 |
| A_21_P0000507  | NR_024230       | SNAR-B2        | small ILF3/NF90-associated RNA B2                            |                 | 0,655577186 |
| A_23_P207345   | NM_002390       | ADAM11         | ADAM metallopeptidase domain 11                              | ENST00000200557 | 0,655256421 |
| A_19_P00319226 | NR_026867       | ZNF300P1       |                                                              | ENST00000520773 | 0,654666806 |
| A_33_P3287338  | NM_001190981    | IL6ST          | interleukin 6 signal transducer (gp130, oncostatin M recept  | ENST00000542298 | 0,654437841 |
| A_21_P0007685  | TCONS_00020709  | XLOC_010007    |                                                              |                 | 0,654300116 |
| A_21_P0010722  | ENST00000455004 | XLOC_I2_000401 |                                                              | ENST00000455004 | 0,654135124 |
| A_21_P0008298  | ENST00000556699 | NGDN           | neuroguidin, EIF4E binding protein                           | ENST00000556699 | 0,653659681 |
| A_24_P348203   | NM_025061       | LRR8E          | leucine rich repeat containing 8 family, member E            | ENST00000306708 | 0,653492833 |
| A_24_P337058   | NM_020307       | CCNL1          | cyclin L1                                                    | ENST00000468977 | 0,653262974 |
| A_23_P122068   | NM_181435       | C1QTNF3        | C1q and tumor necrosis factor related protein 3              | ENST00000513471 | 0,653257765 |
| A_21_P0000491  | NR_004383       | SNAR-G1        | small ILF3/NF90-associated RNA G1                            |                 | 0,653113811 |
| A_23_P323243   | NM_173516       | PNLDC1         | poly(A)-specific ribonuclease (PARN)-like domain containing  | ENST00000275275 | 0,65291329  |
| A_23_P342398   | NR_034140       | C12orf33       | chromosome 12 open reading frame 33                          |                 | 0,652607518 |
| A_19_P00320090 | NR_027058       | LINC00338      | long intergenic non-protein coding RNA 338                   | ENST00000434411 | 0,652206424 |
| A_21_P0006557  | ENST00000449605 | XLOC_007942    |                                                              | ENST00000449605 | 0,651690426 |

|               |                  |                |                                                             |                 |             |
|---------------|------------------|----------------|-------------------------------------------------------------|-----------------|-------------|
| A_23_P87791   | NM_001093        | ACACB          | acetyl-CoA carboxylase beta                                 | ENST00000543201 | 0,651131664 |
| A_21_P0013153 | ENST00000419061  | XLOC_I2_013116 |                                                             | ENST00000419061 | 0,6509712   |
| A_33_P3289745 | XR_111182        | LOC399900      | uncharacterized LOC399900                                   |                 | 0,650580803 |
| A_21_P0002422 | ENST00000413792  | XLOC_002049    |                                                             | ENST00000413792 | 0,650566217 |
| A_23_P87491   | NM_001638        | APOF           | apolipoprotein F                                            | ENST00000541105 | 0,650454438 |
| A_33_P3556532 | ENST00000464366  | DNAH17         | dynein, axonemal, heavy chain 17                            | ENST00000464366 | 0,650274063 |
| A_23_P61637   | NM_002108        | HAL            | histidine ammonia-lyase                                     | ENST00000546999 | 0,649799796 |
| A_23_P311713  | NM_173572        | C10orf93       | chromosome 10 open reading frame 93                         | ENST00000368585 | 0,649755234 |
| A_33_P3587376 | NR_024214        | SNAR-A3        | small ILF3/NF90-associated RNA A3                           |                 | 0,649508212 |
| A_23_P350451  | NM_001198        | PRDM1          | PR domain containing 1, with ZNF domain                     | ENST00000456278 | 0,649293443 |
| A_21_P0003723 | THC2715353       | XLOC_003884    |                                                             |                 | 0,64922585  |
| A_33_P3256778 | NM_000614        | CNTF           | ciliary neurotrophic factor                                 |                 | 0,649013043 |
| A_21_P0014071 | XR_108345        | LOC100132909   | uncharacterized LOC100132909                                |                 | 0,648890705 |
| A_21_P0012549 | ENST00000507238  | XLOC_I2_010348 |                                                             | ENST00000507238 | 0,648765126 |
| A_23_P120170  | NM_145702        | TIGD1          | tigger transposable element derived 1                       | ENST00000408957 | 0,648544618 |
| A_33_P3271121 | ENST00000484097  | SH3BP4         | SH3-domain binding protein 4                                | ENST00000484097 | 0,648249236 |
| A_23_P417261  | NM_144715        | EFHB           | EF-hand domain family, member B                             | ENST00000295824 | 0,648161922 |
| A_33_P3330546 | NM_152557        | ZNF746         | zinc finger protein 746                                     | ENST00000486492 | 0,648066257 |
| A_21_P0010643 | TCONS_I2_0000146 | XLOC_I2_001064 |                                                             |                 | 0,647793669 |
| A_21_P0010642 | ENST00000430316  | XLOC_I2_001064 |                                                             | ENST00000430316 | 0,64779084  |
| A_21_P0001387 | ENST00000456125  | XLOC_000471    |                                                             | ENST00000456125 | 0,647539708 |
| A_33_P3369419 | NM_032292        | GON4L          | gon-4-like (C. elegans)                                     | ENST00000368327 | 0,647483941 |
| A_33_P3276455 | NM_006618        | KDM5B          | lysine (K)-specific demethylase 5B                          | ENST00000543924 | 0,64735474  |
| A_24_P29401   | NM_181523        | PIK3R1         | phosphoinositide-3-kinase, regulatory subunit 1 (alpha)     | ENST00000396611 | 0,646947923 |
| A_24_P287766  | NM_033226        | ABCC12         | ATP-binding cassette, sub-family C (CFTR/MRP), member 12    | ENST00000416054 | 0,646744938 |
| A_21_P0003691 | TCONS_00008360   | XLOC_003810    |                                                             |                 | 0,646705395 |
| A_24_P292929  | NM_172207        | CAMKK1         | calcium/calmodulin-dependent protein kinase kinase 1, alpha | ENST00000158166 | 0,646696761 |
| A_23_P66260   | NM_003414        | ZNF267         | zinc finger protein 267                                     | ENST00000300870 | 0,646328591 |
| A_21_P0010099 | TCONS_00028586   | XLOC_013605    |                                                             |                 | 0,646300011 |



|               |                  |                |                                                           |                 |             |
|---------------|------------------|----------------|-----------------------------------------------------------|-----------------|-------------|
| A_21_P0000508 | NR_024243        | SNAR-D         | small ILF3/NF90-associated RNA D                          |                 | 0,64622028  |
| A_33_P3240727 | NM_001080470     | ZNF697         | zinc finger protein 697                                   | ENST00000421812 | 0,646157922 |
| A_21_P0014788 | XR_132572        | LOC100652971   | uncharacterized LOC100652971                              |                 | 0,646091413 |
| A_23_P74737   | NM_001990        | EYA3           | eyes absent homolog 3 (Drosophila)                        | ENST00000495923 | 0,645400792 |
| A_23_P32454   | NM_003235        | TG             | thyroglobulin                                             | ENST00000220616 | 0,645322832 |
| A_21_P0001322 | TCONS_00000997   | XLOC_000263    |                                                           |                 | 0,645043225 |
| A_21_P0006232 | ENST00000439014  | XLOC_007586    |                                                           | ENST00000439014 | 0,644562362 |
| A_23_P83347   | NM_145051        | RNF183         | ring finger protein 183                                   | ENST00000478815 | 0,6439844   |
| A_33_P3272962 | NM_001037732     | DEFB128        | defensin, beta 128                                        | ENST00000334391 | 0,643943568 |
| A_23_P142407  | NM_033204        | ZNF101         | zinc finger protein 101                                   | ENST00000444249 | 0,643462395 |
| A_21_P0007960 | AF339799         | XLOC_010477    |                                                           | ENST00000434547 | 0,643353541 |
| A_23_P369994  | NM_004734        | DCLK1          | doublecortin-like kinase 1                                | ENST00000255448 | 0,642797837 |
| A_21_P0006436 | ENST00000424539  | XLOC_008084    |                                                           | ENST00000424539 | 0,642620783 |
| A_21_P0006573 | NR_038461        | LOC100128420   | uncharacterized LOC100128420                              | ENST00000454385 | 0,642356241 |
| A_21_P0011998 | TCONS_I2_0001523 | XLOC_I2_007186 |                                                           |                 | 0,642044416 |
| A_24_P3783    | NM_003521        | HIST1H2BM      | histone cluster 1, H2bm                                   | ENST00000359465 | 0,642026085 |
| A_21_P0011299 | THC2554687       | XLOC_I2_004595 |                                                           |                 | 0,641897023 |
| A_23_P216915  | NM_004959        | NR5A1          | nuclear receptor subfamily 5, group A, member 1           | ENST00000373588 | 0,641698901 |
| A_21_P0000669 | NM_024580        | EFTUD1         | elongation factor Tu GTP binding domain containing 1      | ENST00000268206 | 0,641014038 |
| A_21_P0007253 | TCONS_00019427   | XLOC_009243    |                                                           |                 | 0,640906034 |
| A_21_P0005011 | TCONS_00012106   | XLOC_005635    |                                                           |                 | 0,640050425 |
| A_23_P335039  | NM_133474        | ZNF721         | zinc finger protein 721                                   | ENST00000338977 | 0,639850866 |
| A_21_P0000509 | NR_024244        | SNAR-G2        | small ILF3/NF90-associated RNA G2                         |                 | 0,63933518  |
| A_33_P3300858 | NM_001005201     | OR8H3          | olfactory receptor, family 8, subfamily H, member 3       | ENST00000313472 | 0,639321728 |
| A_24_P251661  | NM_171828        | KCNMB3         | potassium large conductance calcium-activated channel, su | ENST00000485523 | 0,638623078 |
| A_32_P19716   | NM_001080470     | ZNF697         | zinc finger protein 697                                   | ENST00000421812 | 0,637940694 |
| A_33_P3261957 | NM_005795        | CALCRL         | calcitonin receptor-like                                  | ENST00000410102 | 0,637644028 |
| A_24_P120109  | NM_198963        | DHX57          | DEAH (Asp-Glu-Ala-Asp/His) box polypeptide 57             | ENST00000355320 | 0,637602077 |
| A_21_P0004620 | AF086258         | XLOC_005936    |                                                           |                 | 0,637476286 |

|               |                   |                |                                               |  |                 |             |
|---------------|-------------------|----------------|-----------------------------------------------|--|-----------------|-------------|
| A_21_P0003192 | TCONS_00006712    | XLOC_003338    |                                               |  |                 | 0,637440626 |
| A_21_P0000383 | NR_003065         | SNORD84        | small nucleolar RNA, C/D box 84               |  | ENST00000467175 | 0,637042303 |
| A_21_P0005349 | ENST00000421380   | XLOC_005965    |                                               |  | ENST00000421380 | 0,636293668 |
| A_24_P298495  | AF289590          | LOC100130744   | uncharacterized LOC100130744                  |  |                 | 0,636283649 |
| A_23_P90542   | NM_152606         | ZNF540         | zinc finger protein 540                       |  | ENST00000316433 | 0,636242915 |
| A_21_P0009587 | THC2519365        | XLOC_012893    |                                               |  |                 | 0,635982443 |
| A_33_P3283420 | NM_203390         | RBM12B         | RNA binding motif protein 12B                 |  | ENST00000517700 | 0,63597118  |
| A_21_P0010959 | TCONS_I2_00004333 | XLOC_I2_002194 |                                               |  |                 | 0,635501917 |
| A_33_P3390580 | NM_014695         | CCDC144A       | coiled-coil domain containing 144A            |  | ENST00000436374 | 0,635467221 |
| A_21_P0008139 | TCONS_00021964    | XLOC_010561    |                                               |  |                 | 0,634626217 |
| A_24_P75917   | NM_014695         | CCDC144A       | coiled-coil domain containing 144A            |  | ENST00000420937 | 0,634625669 |
| A_33_P3474538 | NM_007138         | ZNF90          | zinc finger protein 90                        |  |                 | 0,633776329 |
| A_21_P0009720 | ENST00000446262   | XLOC_013056    |                                               |  | ENST00000446262 | 0,633666851 |
| A_23_P108932  | NR_002229         | RPL23AP32      | ribosomal protein L23a pseudogene 32          |  |                 | 0,633594713 |
| A_32_P64475   | NM_152608         | C1orf55        | chromosome 1 open reading frame 55            |  | ENST00000366817 | 0,633485911 |
| A_23_P153930  | NM_001616         | ACVR2A         | activin A receptor, type IIA                  |  | ENST00000495775 | 0,632825909 |
| A_21_P0010650 | ENST00000422716   | XLOC_I2_001089 |                                               |  | ENST00000422716 | 0,632794721 |
| A_33_P3228510 | NM_177996         | EPB41L1        | erythrocyte membrane protein band 4.1-like 1  |  | ENST00000373945 | 0,632748561 |
| A_21_P0010749 | NR_033908         | LOC100288069   | general transcription factor Ili pseudogene   |  | ENST00000491962 | 0,632608647 |
| A_33_P3229122 | NM_003522         | HIST1H2BF      | histone cluster 1, H2bf                       |  | ENST00000359985 | 0,632570036 |
| A_23_P147439  | NM_148416         | ATXN2L         | ataxin 2-like                                 |  | ENST00000359153 | 0,63251448  |
| A_23_P145584  | NM_003344         | UBE2H          | ubiquitin-conjugating enzyme E2H              |  | ENST00000355621 | 0,632492633 |
| A_23_P250385  | NM_005322         | HIST1H1B       | histone cluster 1, H1b                        |  | ENST00000331442 | 0,632066326 |
| A_21_P0011288 | NM_012102         | RERE           | arginine-glutamic acid dipeptide (RE) repeats |  | ENST00000480342 | 0,631609803 |
| A_23_P107744  | NM_030760         | S1PR5          | sphingosine-1-phosphate receptor 5            |  | ENST00000359134 | 0,631605283 |
| A_21_P0000563 | NR_028374         | SNORA80B       | small nucleolar RNA, H/ACA box 80B            |  |                 | 0,631592439 |
| A_33_P3246293 | NM_001145207      | HBS1L          | HBS1-like ( <i>S. cerevisiae</i> )            |  | ENST00000367822 | 0,631229259 |
| A_21_P0000577 | NR_029378         | LOC100289511   | uncharacterized LOC100289511                  |  |                 | 0,631162882 |
| A_21_P0002473 | TCONS_00004332    | XLOC_002206    |                                               |  |                 | 0,631125813 |

|               |                 |                |                                                                                     |                 |             |
|---------------|-----------------|----------------|-------------------------------------------------------------------------------------|-----------------|-------------|
| A_24_P475864  | NR_003369       | RRN3P2         | RNA polymerase I transcription factor homolog ( <i>S. cerevisiae</i> ) pseudogene 2 |                 | 0,63106976  |
| A_21_P0002408 | TCONS_00004157  | XLOC_002003    |                                                                                     |                 | 0,630335383 |
| A_21_P0008517 | XR_110221       | LOC100506476   | uncharacterized LOC100506476                                                        |                 | 0,630218464 |
| A_33_P3325384 | NR_038921       | LOC100130992   | uncharacterized LOC100130992                                                        |                 | 0,630095006 |
| A_23_P114626  | NM_000488       | SERPINC1       | serpin peptidase inhibitor, clade C (antithrombin), member                          | ENST00000351522 | 0,630057106 |
| A_33_P3275943 | NM_052927       | PWWP2A         | PWWP domain containing 2A                                                           | ENST00000521424 | 0,62987044  |
| A_21_P0013285 | ENST00000435968 | XLOC_I2_013734 |                                                                                     | ENST00000435968 | 0,629848766 |
| A_23_P123228  | NM_000111       | SLC26A3        | solute carrier family 26, member 3                                                  | ENST00000340010 | 0,62966413  |
| A_23_P78018   | NM_018672       | ABCA5          | ATP-binding cassette, sub-family A (ABC1), member 5                                 | ENST00000392676 | 0,629569607 |
| A_33_P3264855 | NM_001145129    | ZNF192P1       | zinc finger protein 192 pseudogene 1                                                |                 | 0,629527892 |
| A_21_P0014050 | XM_003403857    | LOC100653292   | putative HERC2-like protein 3-like                                                  |                 | 0,629341951 |
| A_21_P0010946 | BX091290        | XLOC_I2_001960 |                                                                                     |                 | 0,629242721 |
| A_23_P301138  | NM_001005910    | IP6K2          | inositol hexakisphosphate kinase 2                                                  | ENST00000416707 | 0,629152091 |
| A_23_P155765  | NM_002129       | HMGB2          | high mobility group box 2                                                           | ENST00000511316 | 0,628978528 |
| A_21_P0014583 | XR_110380       | LOC100507033   | uncharacterized LOC100507033                                                        | ENST00000455557 | 0,628926427 |
| A_24_P348265  | NM_133271       | FCAR           | Fc fragment of IgA, receptor for                                                    | ENST00000471750 | 0,628907448 |
| A_32_P2392    | NM_181077       | GOLGA8A        | golgin A8 family, member A                                                          | ENST00000509311 | 0,628706327 |
| A_21_P0009820 | ENST00000422519 | XLOC_013737    |                                                                                     | ENST00000422519 | 0,62746173  |
| A_24_P262127  | NM_004165       | RRAD           | Ras-related associated with diabetes                                                | ENST00000299759 | 0,627226466 |
| A_21_P0000040 | NM_001164313    | ZBTB24         | zinc finger and BTB domain containing 24                                            |                 | 0,627143393 |
| A_24_P306824  | NM_001100916    | MBOAT4         | membrane bound O-acyltransferase domain containing 4                                | ENST00000320542 | 0,626890307 |
| A_23_P377411  | AF130105        | LOC100133130   | PRO1102                                                                             |                 | 0,626818489 |
| A_33_P3265714 | NM_173649       | C2orf61        | chromosome 2 open reading frame 61                                                  |                 | 0,626813581 |
| A_33_P3363120 | NR_004387       | SCARNA10       | small Cajal body-specific RNA 10                                                    |                 | 0,626714345 |
| A_33_P3404671 | NR_024567       | LOC100130557   | uncharacterized LOC100130557                                                        |                 | 0,626438493 |
| A_21_P0002514 | BI765130        | XLOC_002360    |                                                                                     |                 | 0,62641834  |
| A_33_P3294031 | NR_002728       | KCNQ1OT1       | KCNQ1 opposite strand/antisense transcript 1 (non-protein coding)                   |                 | 0,626391743 |
| A_23_P401014  | NM_005744       | ARIH1          | ariadne homolog, ubiquitin-conjugating enzyme E2 binding                            | ENST00000299305 | 0,626002282 |
| A_23_P364107  | NM_018353       | MIS18BP1       | MIS18 binding protein 1                                                             | ENST00000470424 | 0,625791296 |

|                |                 |                 |                                                                |                 |  |             |
|----------------|-----------------|-----------------|----------------------------------------------------------------|-----------------|--|-------------|
| A_21_P0006182  | TCONS_00016075  | XLOC_007464     |                                                                |                 |  | 0,625674473 |
| A_23_P65208    | NM_001039650    | ZMYM5           | zinc finger, MYM-type 5                                        | ENST00000467542 |  | 0,625525045 |
| A_24_P303420   | NR_026938       | LOC221442       | adenylate cyclase 10 (soluble) pseudogene                      |                 |  | 0,625523947 |
| A_33_P3227896  | NR_027145       | LIMS3-LOC440895 | LIMS3-LOC440895 readthrough                                    | ENST00000303002 |  | 0,625068104 |
| A_21_P0014591  | XR_110418       | LOC100507280    | uncharacterized LOC100507280                                   |                 |  | 0,624586167 |
| A_33_P3367899  | NM_005479       | FRAT1           | frequently rearranged in advanced T-cell lymphomas             | ENST00000371021 |  | 0,624352246 |
| A_23_P303803   | NM_152474       | C19orf18        | chromosome 19 open reading frame 18                            | ENST00000314391 |  | 0,624349914 |
| A_21_P0014708  | ENST00000505245 | ATP6V1E2        | ATPase, H+ transporting, lysosomal 31kDa, V1 subunit E2        | ENST00000505245 |  | 0,624282043 |
| A_21_P0008819  | TCONS_00023895  | XLOC_011197     |                                                                |                 |  | 0,624206824 |
| A_21_P0007078  | TCONS_00018817  | XLOC_008614     |                                                                |                 |  | 0,623773749 |
| A_21_P0002183  | TCONS_00003598  | XLOC_001386     |                                                                |                 |  | 0,623656966 |
| A_21_P0012690  | THC2705642      | XLOC_I2_011302  |                                                                |                 |  | 0,623547867 |
| A_23_P106371   | NM_001038640    | GOLGA6A         | golgin A6 family, member A                                     | ENST00000290438 |  | 0,62337442  |
| A_33_P3381870  | NM_001978       | EPB49           | erythrocyte membrane protein band 4.9 (dematin)                | ENST00000358242 |  | 0,623157136 |
| A_33_P3732854  | AY358215        | OR9H1P          | olfactory receptor, family 9, subfamily H, member 1 pseudogene |                 |  | 0,622701865 |
| A_21_P0011322  | NM_020759       | STARD9          | StAR-related lipid transfer (START) domain containing 9        | ENST00000290607 |  | 0,622559789 |
| A_23_P102331   | NM_002976       | SCN7A           | sodium channel, voltage-gated, type VII, alpha                 | ENST00000409855 |  | 0,622440226 |
| A_21_P0008583  | TCONS_00023298  | XLOC_011167     |                                                                |                 |  | 0,622087371 |
| A_19_P00320184 | NR_038988       | LOC100287765    |                                                                |                 |  | 0,621908665 |
| A_21_P0008925  | TCONS_00024377  | XLOC_011701     |                                                                |                 |  | 0,621856741 |
| A_24_P217834   | NM_003530       | HIST1H3D        | histone cluster 1, H3d                                         | ENST00000377831 |  | 0,621125871 |
| A_21_P0005491  | THC2719594      | XLOC_006415     |                                                                |                 |  | 0,621012474 |
| A_21_P0008053  | TCONS_00021760  | XLOC_010354     |                                                                |                 |  | 0,620714074 |
| A_21_P0010794  | ENST00000411733 | XLOC_I2_001399  |                                                                | ENST00000411733 |  | 0,620617889 |
| A_23_P153855   | NM_020855       | ZNF492          | zinc finger protein 492                                        | ENST00000456783 |  | 0,620320423 |
| A_21_P0001125  | TCONS_00000513  | XLOC_000816     |                                                                |                 |  | 0,620184515 |
| A_33_P3549874  | BC031230        | LOC255177       | uncharacterized LOC255177                                      |                 |  | 0,619694108 |
| A_21_P0006299  | TCONS_00016434  | XLOC_007800     |                                                                |                 |  | 0,619669265 |
| A_23_P418083   | NM_181714       | LCA5            | Leber congenital amaurosis 5                                   | ENST00000392959 |  | 0,619371458 |

|               |                  |                |                                                          |                 |             |
|---------------|------------------|----------------|----------------------------------------------------------|-----------------|-------------|
| A_23_P393034  | NM_005329        | HAS3           | hyaluronan synthase 3                                    | ENST00000306560 | 0,619304609 |
| A_23_P162288  | NM_005379        | MYO1A          | myosin IA                                                | ENST00000544473 | 0,619247006 |
| A_21_P0014636 | ENST00000412918  | ITPKB-IT1      |                                                          | ENST00000412918 | 0,619221632 |
| A_21_P0014066 | XR_108328        | LOC100506636   | uncharacterized LOC100506636                             |                 | 0,61895507  |
| A_32_P113566  | NM_152733        | BTBD9          | BTB (POZ) domain containing 9                            | ENST00000403056 | 0,618735647 |
| A_21_P0011558 | ENST00000434427  | XLOC_I2_005916 |                                                          | ENST00000434427 | 0,618519322 |
| A_21_P0007226 | TCONS_00019360   | XLOC_009185    |                                                          |                 | 0,61806707  |
| A_24_P555473  | NM_178450        | Mar-03         | membrane-associated ring finger (C3HC4) 3                | ENST00000308660 | 0,61797501  |
| A_23_P99996   | NM_019066        | MAGEL2         | MAGE-like 2                                              | ENST00000532292 | 0,61791177  |
| A_21_P0011920 | TCONS_I2_0001459 | XLOC_I2_008031 |                                                          |                 | 0,617817353 |
| A_33_P3388067 | NM_001159524     | ZNF735         | zinc finger protein 735                                  |                 | 0,617272825 |
| A_23_P337270  | ENST00000383770  | NEK10          | NIMA (never in mitosis gene a)- related kinase 10        | ENST00000383770 | 0,617148279 |
| A_33_P3284077 | NM_018230        | NUP133         | nucleoporin 133kDa                                       | ENST00000366678 | 0,616985748 |
| A_24_P243749  | NM_002612        | PDK4           | pyruvate dehydrogenase kinase, isozyme 4                 | ENST00000542888 | 0,616532319 |
| A_21_P0009784 | THC2615013       | XLOC_013037    |                                                          |                 | 0,615706876 |
| A_33_P3321781 | XR_109412        | FLJ44342       | uncharacterized LOC645460                                |                 | 0,61521186  |
| A_21_P0012183 | NR_040113        | ANKRD20A5P     | ankyrin repeat domain 20 family, member A5, pseudogene   | ENST00000432875 | 0,615158073 |
| A_24_P321634  | NM_001039650     | ZMYM5          | zinc finger, MYM-type 5                                  | ENST00000467542 | 0,615019142 |
| A_23_P102172  | NM_173077        | CPO            | carboxypeptidase O                                       | ENST00000272852 | 0,614813563 |
| A_21_P0013394 | ENST00000438538  | XLOC_I2_013513 |                                                          | ENST00000438538 | 0,614620694 |
| A_24_P64918   | NM_014950        | ZBTB1          | zinc finger and BTB domain containing 1                  | ENST00000554015 | 0,614610395 |
| A_21_P0004689 | ENST00000434255  | XLOC_005471    |                                                          | ENST00000434255 | 0,6144607   |
| A_33_P3375636 | NM_001129891     | FAM196B        | family with sequence similarity 196, member B            | ENST00000377365 | 0,614152749 |
| A_23_P83931   | NM_001047160     | NET1           | neuroepithelial cell transforming 1                      | ENST00000380337 | 0,614010458 |
| A_23_P118854  | NM_003770        | KRT37          | keratin 37                                               |                 | 0,61398437  |
| A_33_P3301316 | NM_174890        | ZFAND4         | zinc finger, AN1-type domain 4                           | ENST00000497028 | 0,613263594 |
| A_33_P3244168 | ENST00000426595  | MRPS17         | mitochondrial ribosomal protein S17                      | ENST00000426595 | 0,612922338 |
| A_33_P3212269 | ENST00000534743  | MAP2K3         | mitogen-activated protein kinase kinase 3                | ENST00000534743 | 0,612645897 |
| A_32_P140706  | NM_000535        | PMS2           | PMS2 postmeiotic segregation increased 2 (S. cerevisiae) | ENST00000338780 | 0,612377274 |

|                |                   |                |                                                 |                 |             |
|----------------|-------------------|----------------|-------------------------------------------------|-----------------|-------------|
| A_21_P0013393  | ENST00000415536   | XLOC_I2_013513 |                                                 | ENST00000415536 | 0,612228088 |
| A_33_P3337959  | AK128227          | LOC100130236   | uncharacterized LOC100130236                    |                 | 0,612198109 |
| A_21_P0009155  | XR_109412         | FLJ44342       | uncharacterized LOC645460                       |                 | 0,612035591 |
| A_21_P0012894  | ENST00000515123   | XLOC_I2_011959 |                                                 | ENST00000515123 | 0,611912057 |
| A_33_P3380597  | NM_173566         | PRR14L         | proline rich 14-like                            | ENST00000431684 | 0,611208805 |
| A_21_P0013772  | ENST00000453317   | XLOC_I2_015561 |                                                 | ENST00000453317 | 0,611108484 |
| A_23_P130444   | NM_018260         | ZNF701         | zinc finger protein 701                         | ENST00000301093 | 0,611096581 |
| A_21_P0010297  | DB312214          | XLOC_014111    |                                                 |                 | 0,610782189 |
| A_24_P935782   | NM_001008727      | ZNF121         | zinc finger protein 121                         | ENST00000538300 | 0,610693559 |
| A_33_P3353030  | NM_003353         | UCN            | urocortin                                       | ENST00000296099 | 0,61065902  |
| A_21_P0000375  | NR_003047         | SNORD19        | small nucleolar RNA, C/D box 19                 |                 | 0,60951483  |
| A_21_P0008997  | TCONS_00024512    | XLOC_011828    |                                                 |                 | 0,607854394 |
| A_33_P3271261  | NM_006181         | NTN3           | netrin 3                                        | ENST00000293973 | 0,607261791 |
| A_32_P109036   | NM_001076678      | ZNF493         | zinc finger protein 493                         | ENST00000355504 | 0,607214804 |
| A_21_P0011003  | TCONS_I2_00004869 | XLOC_I2_002537 |                                                 |                 | 0,607117014 |
| A_21_P0001086  | ENST00000458555   | XLOC_000671    |                                                 | ENST00000458555 | 0,606825519 |
| A_23_P140475   | NM_024505         | NOX5           | NADPH oxidase, EF-hand calcium binding domain 5 | ENST00000260364 | 0,606731997 |
| A_24_P350589   | NM_020724         | RNF150         | ring finger protein 150                         | ENST00000306799 | 0,606184893 |
| A_19_P00322291 | NR_036444         | LOC400550      | uncharacterized LOC400550                       |                 | 0,605712723 |
| A_33_P3725324  | NM_004654         | USP9Y          | ubiquitin specific peptidase 9, Y-linked        | ENST00000338981 | 0,605552156 |
| A_23_P50418    | NM_153358         | ZNF791         | zinc finger protein 791                         | ENST00000540038 | 0,605292465 |
| A_23_P13033    | NM_002896         | RBM4           | RNA binding motif protein 4                     | ENST00000408993 | 0,604522675 |
| A_21_P0006393  | TCONS_00016868    | XLOC_007850    |                                                 |                 | 0,603795964 |
| A_32_P198990   | AK126439          | LOC100131929   | uncharacterized LOC100131929                    |                 | 0,60333507  |
| A_23_P107744   | NM_030760         | S1PR5          | sphingosine-1-phosphate receptor 5              | ENST00000359134 | 0,603137324 |
| A_23_P6596     | NM_005524         | HES1           | hairy and enhancer of split 1, (Drosophila)     | ENST00000476918 | 0,603059706 |
| A_33_P3243345  | NM_001080528      | LOC646498      | uncharacterized LOC646498                       | ENST00000545770 | 0,602865818 |
| A_33_P3214925  | ENST00000477990   | MIB2           | mindbomb homolog 2 (Drosophila)                 | ENST00000477990 | 0,602579592 |
| A_33_P3344277  | BC057389          | HS1BP3         | HCLS1 binding protein 3                         | ENST00000402541 | 0,602234436 |



|               |                 |                |                                                                                   |                 |             |
|---------------|-----------------|----------------|-----------------------------------------------------------------------------------|-----------------|-------------|
| A_21_P0004180 | ENST00000507509 | XLOC_004992    |                                                                                   | ENST00000507509 | 0,602160637 |
| A_24_P409126  | ENST00000378383 | FNDC3A         | fibronectin type III domain containing 3A                                         | ENST00000378383 | 0,602071335 |
| A_24_P182494  | NM_007207       | DUSP10         | dual specificity phosphatase 10                                                   | ENST00000494642 | 0,601906394 |
| A_21_P0009153 | BC084573        | XLOC_012452    |                                                                                   |                 | 0,601819648 |
| A_21_P0002920 | ENST00000418353 | XLOC_003383    |                                                                                   | ENST00000418353 | 0,601806975 |
| A_33_P3243113 | NR_024121       | LINC00235      | long intergenic non-protein coding RNA 235                                        |                 | 0,601774222 |
| A_33_P3212909 | NM_033400       | ZFH2           | zinc finger homeobox 2                                                            | ENST00000382785 | 0,601771511 |
| A_33_P3399943 | NM_021135       | RPS6KA2        | ribosomal protein S6 kinase, 90kDa, polypeptide 2                                 | ENST00000366863 | 0,601492323 |
| A_21_P0011686 | ENST00000327867 | ZNF730         | zinc finger protein 730                                                           | ENST00000327867 | 0,601478711 |
| A_24_P72178   | NR_028093       | LPAL2          | lipoprotein, Lp(a)-like 2, pseudogene                                             | ENST00000435757 | 0,601327506 |
| A_23_P8142    | NM_001832       | CLPS           | colipase, pancreatic                                                              | ENST00000541088 | 0,601233965 |
| A_33_P3389973 | ENST00000373009 | USP49          | ubiquitin specific peptidase 49                                                   | ENST00000373009 | 0,60091553  |
| A_21_P0011500 | NR_033908       | LOC100288069   | general transcription factor Ili pseudogene                                       | ENST00000417964 | 0,600674015 |
| A_21_P0003557 | THC2722672      | XLOC_003417    |                                                                                   |                 | 0,600297708 |
| A_23_P427217  | NM_032776       | JMJD1C         | jumonji domain containing 1C                                                      | ENST00000542921 | 0,600238276 |
| A_23_P28186   | NM_000348       | SRD5A2         | steroid-5-alpha-reductase, alpha polypeptide 2 (3-oxo-5 alpha-steroid delta 4-deh |                 | 0,599889696 |
| A_33_P3280687 | NM_052925       | LENG8          | leukocyte receptor cluster (LRC) member 8                                         | ENST00000376514 | 0,599887665 |
| A_33_P3290945 | NM_017952       | PTCD3          | Pentatricopeptide repeat domain 3                                                 | ENST00000465560 | 0,599710308 |
| A_24_P68019   | NM_138347       | ZNF551         | zinc finger protein 551                                                           | ENST00000282296 | 0,599681838 |
| A_33_P3406998 | NM_130438       | DYRK1A         | dual-specificity tyrosine-(Y)-phosphorylation regulated kina:                     | ENST00000462274 | 0,599303224 |
| A_23_P253921  | NM_018651       | ZNF167         | zinc finger protein 167                                                           | ENST00000273320 | 0,599156733 |
| A_21_P0013334 | NM_001145268    | FAM185A        | family with sequence similarity 185, member A                                     | ENST00000496790 | 0,598941418 |
| A_24_P126406  | NM_173628       | DNAH17         | dynein, axonemal, heavy chain 17                                                  | ENST00000389840 | 0,598851502 |
| A_21_P0011981 | ENST00000427108 | XLOC_I2_008381 |                                                                                   | ENST00000427108 | 0,598675323 |
| A_21_P0012916 | THC2691285      | XLOC_I2_012135 |                                                                                   |                 | 0,598531494 |
| A_23_P107744  | NM_030760       | S1PR5          | sphingosine-1-phosphate receptor 5                                                | ENST00000359134 | 0,598424718 |
| A_32_P176550  | NM_152405       | JMY            | junction mediating and regulatory protein, p53 cofactor                           | ENST00000282259 | 0,598299969 |
| A_21_P0009929 | TCONS_00028096  | XLOC_013447    |                                                                                   |                 | 0,598089979 |
| A_23_P78458   | NM_021632       | ZNF350         | zinc finger protein 350                                                           | ENST00000243644 | 0,597855927 |

|                |                 |                |                                                                     |                 |             |
|----------------|-----------------|----------------|---------------------------------------------------------------------|-----------------|-------------|
| A_33_P3353027  | ENST00000461824 | CHN2           | chimerin (chimaerin) 2                                              | ENST00000461824 | 0,597790886 |
| A_33_P3278774  | ENST00000483826 | ZNF44          | zinc finger protein 44                                              | ENST00000483826 | 0,597784088 |
| A_23_P216812   | NM_004936       | CDKN2B         | cyclin-dependent kinase inhibitor 2B (p15, inhibits CDK4)           | ENST00000380142 | 0,597651551 |
| A_33_P3359027  | NM_001144872    | CCDC42B        | coiled-coil domain containing 42B                                   | ENST00000551256 | 0,597496497 |
| A_21_P0013368  | ENST00000419463 | XLOC_I2_013295 |                                                                     | ENST00000419463 | 0,597419297 |
| A_23_P56746    | NM_004460       | FAP            | fibroblast activation protein, alpha                                | ENST00000188790 | 0,596851041 |
| A_33_P3346498  | NM_130831       | OPA1           | optic atrophy 1 (autosomal dominant)                                | ENST00000392437 | 0,596848524 |
| A_33_P3301752  | XR_108277       | FLJ21369       | uncharacterized protein FLJ21369                                    |                 | 0,596032067 |
| A_33_P3233050  | AK124895        | SAMM50         | sorting and assembly machinery component 50 homolog (S. cerevisiae) |                 | 0,595982708 |
| A_21_P0002651  | TCONS_00005105  | XLOC_002010    |                                                                     |                 | 0,595788832 |
| A_21_P0000380  | NR_003057       | SNORD69        | small nucleolar RNA, C/D box 69                                     |                 | 0,594917802 |
| A_33_P3484806  | AK025061        | FLJ21408       | uncharacterized LOC400512                                           |                 | 0,594815066 |
| A_24_P7629     | NR_003111       | RPL32P3        | ribosomal protein L32 pseudogene 3                                  | ENST00000510078 | 0,594748804 |
| A_21_P0002315  | TCONS_00003936  | XLOC_001749    |                                                                     |                 | 0,594582893 |
| A_23_P101476   | NM_030824       | ZNF442         | zinc finger protein 442                                             | ENST00000242804 | 0,594331312 |
| A_21_P0007057  | NR_024497       | LOC399744      | uncharacterized LOC399744                                           | ENST00000423687 | 0,59419731  |
| A_33_P3383351  | ENST00000464187 | COL5A1         | collagen, type V, alpha 1                                           | ENST00000464187 | 0,594180517 |
| A_23_P215484   | NM_006072       | CCL26          | chemokine (C-C motif) ligand 26                                     | ENST00000394905 | 0,594039299 |
| A_33_P3641427  | NM_016132       | MYEF2          | myelin expression factor 2                                          | ENST00000324324 | 0,593873676 |
| A_23_P1173     | NM_004132       | HABP2          | hyaluronan binding protein 2                                        | ENST00000351270 | 0,593867163 |
| A_19_P00318272 | NR_038988       | LOC100287765   |                                                                     |                 | 0,593855982 |
| A_33_P3256532  | NM_032120       | C7orf64        | chromosome 7 open reading frame 64                                  | ENST00000450580 | 0,593768559 |
| A_33_P3400171  | NM_001626       | AKT2           | v-akt murine thymoma viral oncogene homolog 2                       | ENST00000392037 | 0,593539214 |
| A_21_P0012877  | NR_033908       | LOC100288069   | general transcription factor Ili pseudogene                         | ENST00000491962 | 0,593376544 |
| A_23_P32707    | NM_012291       | ESPL1          | extra spindle pole bodies homolog 1 (S. cerevisiae)                 | ENST00000552462 | 0,593119214 |
| A_21_P0009018  | TCONS_00024600  | XLOC_011893    |                                                                     |                 | 0,59304235  |
| A_21_P0014604  | XR_110494       | LOC100506528   | uncharacterized LOC100506528                                        |                 | 0,592661268 |
| A_33_P3252630  | NM_203282       | ZNF254         | zinc finger protein 254                                             | ENST00000392281 | 0,592653724 |
| A_23_P148600   | NR_024616       | INE1           | inactivation escape 1 (non-protein coding)                          | ENST00000456273 | 0,59249066  |

|                |                 |                |                                                      |                 |             |
|----------------|-----------------|----------------|------------------------------------------------------|-----------------|-------------|
| A_33_P3364190  | NM_001004491    | OR2AK2         | olfactory receptor, family 2, subfamily AK, member 2 | ENST00000366480 | 0,592428638 |
| A_33_P3315764  | NM_000546       | TP53           | tumor protein p53                                    | ENST00000359597 | 0,592378685 |
| A_23_P107744   | NM_030760       | S1PR5          | sphingosine-1-phosphate receptor 5                   | ENST00000359134 | 0,592026542 |
| A_21_P0013298  | NR_024271       | SEPT7P2        | septin 7 pseudogene 2                                | ENST00000338231 | 0,591963815 |
| A_23_P41541    | NM_138364       | PRMT10         | protein arginine methyltransferase 10 (putative)     | ENST00000511687 | 0,59189803  |
| A_21_P0010761  | BC035370        | XLOC_I2_000941 |                                                      |                 | 0,591795347 |
| A_23_P112220   | NM_002195       | INSL4          | insulin-like 4 (placenta)                            | ENST00000239316 | 0,591716622 |
| A_21_P0009970  | DA133334        | XLOC_013555    |                                                      |                 | 0,591684894 |
| A_33_P3354429  | NM_001039111    | TRIM71         | tripartite motif containing 71                       | ENST00000383763 | 0,591358803 |
| A_23_P116173   | NM_001136105    | C11orf93       | chromosome 11 open reading frame 93                  | ENST00000398035 | 0,591302261 |
| A_21_P0014779  | ENST00000494753 | PLIN2          | perilipin 2                                          | ENST00000494753 | 0,591214973 |
| A_23_P112874   | NM_004466       | GPC5           | glypican 5                                           | ENST00000377067 | 0,591066486 |
| A_33_P3409124  | NM_005126       | NR1D2          | nuclear receptor subfamily 1, group D, member 2      | ENST00000383773 | 0,590560893 |
| A_23_P417891   | NM_145735       | ARHGEF7        | Rho guanine nucleotide exchange factor (GEF) 7       | ENST00000375741 | 0,590324909 |
| A_23_P415470   | NM_032100       | PCDHGB6        | protocadherin gamma subfamily B, 6                   | ENST00000520790 | 0,58995971  |
| A_21_P0014627  | XR_110765       | LOC100510007   | uncharacterized LOC100510007                         |                 | 0,589867775 |
| A_33_P3292694  | XR_110489       | LOC643355      | uncharacterized LOC643355                            |                 | 0,589828195 |
| A_21_P0003235  | TCONS_00006887  | XLOC_002701    |                                                      |                 | 0,589640894 |
| A_33_P3337480  | NM_001004328    | ZNF705A        | zinc finger protein 705A                             | ENST00000359286 | 0,589443082 |
| A_21_P0012323  | ENST00000446078 | XLOC_I2_009359 |                                                      | ENST00000446078 | 0,589142762 |
| A_19_P00316919 | NR_027058       | LINC00338      | long intergenic non-protein coding RNA 338           | ENST00000434411 | 0,589105588 |
| A_24_P944588   | NM_033196       | ZNF682         | zinc finger protein 682                              | ENST00000341262 | 0,588483336 |
| A_21_P0014390  | ENST00000476474 | LOC100507111   |                                                      | ENST00000476474 | 0,588011749 |
| A_23_P94879    | NM_000506       | F2             | coagulation factor II (thrombin)                     | ENST00000311907 | 0,587701963 |
| A_21_P0005651  | ENST00000517816 | XLOC_006704    |                                                      | ENST00000517816 | 0,587073759 |
| A_23_P133739   | NM_148959       | HUS1B          | HUS1 checkpoint homolog b (S. pombe)                 | ENST00000380907 | 0,58682773  |
| A_33_P3740020  | BE172294        | SNORD9         | small nucleolar RNA, C/D box 9                       |                 | 0,586759198 |
| A_24_P677642   | NR_038275       | FLJ31813       | FAM21B pseudogene                                    | ENST00000456967 | 0,586736624 |
| A_33_P3363655  | NM_022662       | ANAPC1         | anaphase promoting complex subunit 1                 | ENST00000451367 | 0,586732607 |

|               |                 |              |                                                          |                 |             |
|---------------|-----------------|--------------|----------------------------------------------------------|-----------------|-------------|
| A_21_P0006821 | TCONS_00018097  | XLOC_008366  |                                                          |                 | 0,586552977 |
| A_21_P0007556 | BC034605        | XLOC_009748  |                                                          |                 | 0,586350151 |
| A_33_P3306654 | NR_024480       | LOC100131551 | uncharacterized LOC100131551                             | ENST00000414120 | 0,586180124 |
| A_33_P3239122 | ENST00000372550 | PPIH         | peptidylprolyl isomerase H (cyclophilin H)               | ENST00000372550 | 0,586139428 |
| A_21_P0014217 | XR_133505       | LOC100507278 | uncharacterized LOC100507278                             |                 | 0,58597959  |
| A_21_P0010118 | THC2663511      | XLOC_013728  |                                                          |                 | 0,585388965 |
| A_21_P0000264 | NR_002579       | SNORD74      | small nucleolar RNA, C/D box 74                          |                 | 0,585139811 |
| A_33_P3328716 | NM_144719       | CCDC13       | coiled-coil domain containing 13                         | ENST00000310232 | 0,585131709 |
| A_21_P0006304 | TCONS_00016442  | XLOC_007808  |                                                          |                 | 0,585124828 |
| A_21_P0013918 | XM_001717195    | LOC731282    | uncharacterized LOC731282                                |                 | 0,584910214 |
| A_33_P3377239 | NR_026885       | LOC100270804 | uncharacterized LOC100270804                             |                 | 0,584856258 |
| A_23_P74042   | NM_012302       | LPHN2        | latrophilin 2                                            | ENST00000370725 | 0,58478475  |
| A_32_P178945  | NM_018566       | YOD1         | YOD1 OTU deubiquinating enzyme 1 homolog (S. cerevisiae) | ENST00000367084 | 0,584574483 |
| A_33_P3381684 | NM_007113       | TCHH         | trichohyalin                                             | ENST00000368804 | 0,5845495   |
| A_32_P114028  | NM_024688       | C10orf68     | chromosome 10 open reading frame 68                      | ENST00000375037 | 0,58447634  |
| A_21_P0006193 | TCONS_00016098  | XLOC_007489  |                                                          |                 | 0,584405911 |
| A_33_P3381483 | NM_018555       | ZNF331       | zinc finger protein 331                                  | ENST00000253144 | 0,584001831 |
| A_33_P3354076 | NR_036433       | FAM172BP     | family with sequence similarity 172, member B pseudogene |                 | 0,58376577  |
| A_21_P0009236 | TCONS_00025349  | XLOC_012169  |                                                          |                 | 0,583686962 |
| A_23_P157027  | ENST00000407838 | VSTM2A       | V-set and transmembrane domain containing 2A             | ENST00000407838 | 0,583593926 |
| A_21_P0000537 | NR_027450       | FAM186B      | family with sequence similarity 186, member B            |                 | 0,583393635 |
| A_24_P290927  | NM_014847       | UBAP2L       | ubiquitin associated protein 2-like                      | ENST00000441890 | 0,582586552 |
| A_21_P0005521 | NR_024586       | LOC100216545 | uncharacterized LOC100216545                             |                 | 0,58257656  |
| A_21_P0014898 | XR_132888       | LOC100652951 | uncharacterized LOC100652951                             |                 | 0,5819067   |
| A_33_P3324383 | NM_001013690    | FIGNL2       | fidgetin-like 2                                          |                 | 0,581821624 |
| A_21_P0006942 | TCONS_00018397  | XLOC_008679  |                                                          |                 | 0,581768473 |
| A_21_P0008665 | TCONS_00023489  | XLOC_011335  |                                                          |                 | 0,581435823 |
| A_33_P3349045 | NM_001008699    | IL4R         | interleukin 4 receptor                                   | ENST00000380925 | 0,580601014 |
| A_33_P3421363 | NM_194320       | ZNF169       | zinc finger protein 169                                  | ENST00000492115 | 0,5800498   |

|                |                  |                |                                                                    |                 |             |
|----------------|------------------|----------------|--------------------------------------------------------------------|-----------------|-------------|
| A_23_P108932   | NR_002229        | RPL23AP32      | ribosomal protein L23a pseudogene 32                               |                 | 0,579897546 |
| A_33_P3346936  | ENST00000549378  | MON2           | MON2 homolog (S. cerevisiae)                                       | ENST00000549378 | 0,579853519 |
| A_33_P3251163  | ENST00000510083  | RNASET2        | ribonuclease T2                                                    | ENST00000510083 | 0,579646745 |
| A_33_P3210085  | NM_001047160     | NET1           | neuroepithelial cell transforming 1                                | ENST00000380337 | 0,57918591  |
| A_24_P385190   | NM_000342        | SLC4A1         | solute carrier family 4, anion exchanger, member 1 (erythrocyte)   | ENST00000471005 | 0,579055981 |
| A_32_P7823     | NM_144578        | MAPK1IP1L      | mitogen-activated protein kinase 1 interacting protein 1-like      | ENST00000395468 | 0,578979711 |
| A_33_P3243929  | AK124016         | FLJ42022       | uncharacterized LOC646748                                          |                 | 0,57894843  |
| A_21_P0009678  | TCONS_00026873   | XLOC_012931    |                                                                    |                 | 0,578761568 |
| A_21_P0011325  | TCONS_I2_0000862 | XLOC_I2_004647 |                                                                    |                 | 0,578725048 |
| A_23_P420334   | NM_152595        | PGBD4          | piggyBac transposable element derived 4                            | ENST00000397766 | 0,578241928 |
| A_33_P3741059  | XR_110492        | LOC100506459   | uncharacterized LOC100506459                                       |                 | 0,578182248 |
| A_21_P0004154  | ENST00000513779  | XLOC_004925    |                                                                    | ENST00000513779 | 0,578128189 |
| A_21_P0007098  | TCONS_00018898   | XLOC_008763    |                                                                    |                 | 0,577728015 |
| A_21_P0008731  | TCONS_00023648   | XLOC_011448    |                                                                    |                 | 0,577462074 |
| A_33_P3362770  | NM_018427        | RRN3           | RRN3 RNA polymerase I transcription factor homolog (S. cerevisiae) | ENST00000327307 | 0,577273826 |
| A_33_P3251672  | NM_001606        | ABCA2          | ATP-binding cassette, sub-family A (ABC1), member 2                | ENST00000398207 | 0,577172266 |
| A_24_P340853   | NM_032789        | PARP10         | poly (ADP-ribose) polymerase family, member 10                     | ENST00000527262 | 0,577168676 |
| A_23_P428184   | NM_021065        | HIST1H2AD      | histone cluster 1, H2ad                                            | ENST00000341023 | 0,57712422  |
| A_21_P0013438  | ENST00000429320  | XLOC_I2_013873 |                                                                    | ENST00000429320 | 0,576686174 |
| A_21_P0000497  | NR_004396        | SNORD1B        | small nucleolar RNA, C/D box 1B                                    |                 | 0,576536833 |
| A_33_P3460485  | BF814437         | SCARNA4        | small Cajal body-specific RNA 4                                    |                 | 0,576342089 |
| A_33_P3389852  | NM_017679        | BCAS3          | breast carcinoma amplified sequence 3                              | ENST00000405217 | 0,576274424 |
| A_21_P0002437  | TCONS_00005144   | XLOC_002085    |                                                                    |                 | 0,576218981 |
| A_19_P00804859 | NR_029635        | MIR221         |                                                                    |                 | 0,575697112 |
| A_33_P3361584  | AK126579         | LOC100130930   | uncharacterized LOC100130930                                       |                 | 0,575672468 |
| A_23_P411157   | NM_005430        | WNT1           | wingless-type MMTV integration site family, member 1               |                 | 0,575501383 |
| A_33_P3267740  | NM_178544        | ZNF546         | zinc finger protein 546                                            | ENST00000392042 | 0,575265214 |
| A_21_P0008366  | TCONS_00022580   | XLOC_010893    |                                                                    |                 | 0,575253216 |
| A_21_P0008195  | TCONS_00022078   | XLOC_010680    |                                                                    |                 | 0,575195863 |

|               |                 |                |                                                            |                 |             |
|---------------|-----------------|----------------|------------------------------------------------------------|-----------------|-------------|
| A_23_P142239  | NM_033557       | YIF1B          | Yip1 interacting factor homolog B ( <i>S. cerevisiae</i> ) | ENST00000392124 | 0,574956647 |
| A_33_P3246026 | NM_001040448    | DEFB131        | defensin, beta 131                                         | ENST00000334879 | 0,574563609 |
| A_33_P3264163 | NM_001202522    | DDR1           | discoidin domain receptor tyrosine kinase 1                | ENST00000400407 | 0,574401344 |
| A_33_P3225096 | NM_017762       | MTMR10         | myotubularin related protein 10                            | ENST00000435680 | 0,574396994 |
| A_33_P3226735 | NR_026876       | STL            | six-twelve leukemia                                        |                 | 0,574072924 |
| A_33_P3212221 | NM_001007188    | DEPDC5         | DEP domain containing 5                                    | ENST00000469974 | 0,57403863  |
| A_23_P148484  | NM_016120       | RLIM           | ring finger protein, LIM domain interacting                | ENST00000349225 | 0,573212027 |
| A_33_P3269278 | NM_153257       | ZNF461         | zinc finger protein 461                                    | ENST00000396896 | 0,573135062 |
| A_33_P3388283 | ENST00000496907 | HMGCL          | 3-hydroxymethyl-3-methylglutaryl-CoA lyase                 | ENST00000496907 | 0,57283382  |
| A_23_P111361  | NM_173672       | PPIL6          | peptidylprolyl isomerase (cyclophilin)-like 6              | ENST00000521072 | 0,572604854 |
| A_21_P0000372 | NR_003042       | SNORD45C       | small nucleolar RNA, C/D box 45C                           | ENST00000471759 | 0,572567151 |
| A_21_P0010590 | THC2520724      | XLOC_I2_000727 |                                                            |                 | 0,572337458 |
| A_33_P3408643 | ENST00000402091 | FAM82A1        | family with sequence similarity 82, member A1              | ENST00000402091 | 0,572163277 |
| A_33_P3357490 | NM_001009565    | CDKL4          | cyclin-dependent kinase-like 4                             | ENST00000378803 | 0,57209183  |
| A_21_P0010268 | BG184196        | XLOC_014001    |                                                            |                 | 0,572083309 |
| A_21_P0004507 | TCONS_00010707  | XLOC_004412    |                                                            |                 | 0,571942772 |
| A_33_P3304501 | NM_001265       | CDX2           | caudal type homeobox 2                                     | ENST00000381020 | 0,571936682 |
| A_21_P0011936 | THC2569496      | XLOC_I2_008140 |                                                            |                 | 0,57189954  |
| A_21_P0010483 | BC037213        | LOC100271722   | uncharacterized LOC100271722                               |                 | 0,571496365 |
| A_21_P0005692 | TCONS_00014684  | XLOC_006781    |                                                            |                 | 0,571002995 |
| A_21_P0011839 | THC2673521      | XLOC_I2_007478 |                                                            |                 | 0,570990869 |
| A_21_P0007077 | TCONS_00018816  | XLOC_008613    |                                                            |                 | 0,57084852  |
| A_33_P3239123 | ENST00000372550 | PPIH           | peptidylprolyl isomerase H (cyclophilin H)                 | ENST00000372550 | 0,570808045 |
| A_21_P0006506 | THC2647795      | XLOC_008020    |                                                            |                 | 0,570751554 |
| A_21_P0014462 | XR_109944       | ZNF638-IT1     | ZNF638 intronic transcript 1 (non-protein coding)          |                 | 0,570549681 |
| A_32_P515431  | XR_110830       | LOC100132057   | phosphodiesterase 4D interacting protein pseudogene        |                 | 0,570392799 |
| A_21_P0008246 | TCONS_00022238  | XLOC_010542    |                                                            |                 | 0,570382137 |
| A_33_P3365870 | NM_001143888    | BSDC1          | BSD domain containing 1                                    | ENST00000325745 | 0,570029138 |
| A_23_P209032  | NM_018443       | ZNF302         | zinc finger protein 302                                    | ENST00000509196 | 0,569555265 |



|               |                 |                |                                                             |                 |             |
|---------------|-----------------|----------------|-------------------------------------------------------------|-----------------|-------------|
| A_23_P376704  | NM_001279       | CIDEA          | cell death-inducing DFFA-like effector a                    | ENST00000320477 | 0,569411615 |
| A_23_P32253   | NM_005384       | NFIL3          | nuclear factor, interleukin 3 regulated                     | ENST00000297689 | 0,569327483 |
| A_21_P0003279 | TCONS_00007119  | XLOC_003052    |                                                             |                 | 0,569204332 |
| A_23_P429998  | NM_006732       | FOSB           | FBJ murine osteosarcoma viral oncogene homolog B            | ENST00000353609 | 0,568761883 |
| A_21_P0009886 | ENST00000417696 | XLOC_013674    |                                                             | ENST00000417696 | 0,568625525 |
| A_24_P65851   | NR_003505       | PPP4R1L        | protein phosphatase 4, regulatory subunit 1-like            | ENST00000493688 | 0,568164618 |
| A_21_P0001659 | TCONS_00001924  | XLOC_000027    |                                                             |                 | 0,568105662 |
| A_21_P0005632 | AK130001        | XLOC_006857    |                                                             |                 | 0,567623967 |
| A_23_P5611    | NM_018151       | RIF1           | RAP1 interacting factor homolog (yeast)                     | ENST00000430328 | 0,567441809 |
| A_33_P3222769 | NM_001013638    | PRR25          | proline rich 25                                             | ENST00000301698 | 0,56681905  |
| A_21_P0011940 | ENST00000447987 | XLOC_l2_008163 |                                                             | ENST00000447987 | 0,566690678 |
| A_21_P0001148 | ENST00000437598 | XLOC_000902    |                                                             | ENST00000437598 | 0,566577562 |
| A_21_P0008897 | BC104446        | LOC283867      | uncharacterized LOC283867                                   |                 | 0,566483236 |
| A_21_P0011967 | NM_003014       | SFRP4          | secreted frizzled-related protein 4                         | ENST00000436072 | 0,566422491 |
| A_33_P3270271 | BC029817        | LOC440386      | uncharacterized LOC440386                                   |                 | 0,566417449 |
| A_33_P3362562 | NM_003161       | RPS6KB1        | ribosomal protein S6 kinase, 70kDa, polypeptide 1           | ENST00000443572 | 0,566224117 |
| A_23_P380990  | NM_173535       | CLEC4F         | C-type lectin domain family 4, member F                     | ENST00000272367 | 0,566195712 |
| A_33_P3285145 | XR_109830       | LOC100131826   | TSSP3028                                                    |                 | 0,566149585 |
| A_21_P0007776 | TCONS_00020964  | XLOC_010234    |                                                             |                 | 0,566053683 |
| A_24_P97770   | NM_001031711    | ERGIC1         | endoplasmic reticulum-golgi intermediate compartment (EF    | ENST00000519796 | 0,566009177 |
| A_23_P122068  | NM_181435       | C1QTNF3        | C1q and tumor necrosis factor related protein 3             | ENST00000513471 | 0,565941061 |
| A_33_P3395513 | ENST00000544729 | NRG2           | neuregulin 2                                                | ENST00000544729 | 0,565600966 |
| A_21_P0014747 | ENST00000437898 | LOC100652915   |                                                             | ENST00000437898 | 0,565578141 |
| A_33_P3241316 | NM_213600       | PLA2G4F        | phospholipase A2, group IVF                                 | ENST00000357924 | 0,565267981 |
| A_21_P0012526 | ENST00000415451 | XLOC_l2_010061 |                                                             | ENST00000415451 | 0,565205034 |
| A_33_P3368646 | NM_173515       | CNKSR3         | CNKSR family member 3                                       | ENST00000367213 | 0,564962868 |
| A_33_P3267460 | NM_134428       | RFX3           | regulatory factor X, 3 (influences HLA class II expression) | ENST00000381984 | 0,564595951 |
| A_21_P0004824 | TCONS_00011651  | XLOC_005133    |                                                             |                 | 0,564575881 |
| A_21_P0009329 | TCONS_00025688  | XLOC_012503    |                                                             |                 | 0,564569699 |

|                |                  |                |                                                       |                 |             |
|----------------|------------------|----------------|-------------------------------------------------------|-----------------|-------------|
| A_21_P0014799  | XR_132602        | LOC100652876   | uncharacterized LOC100652876                          |                 | 0,564559157 |
| A_23_P170534   | NM_004479        | FUT7           | fucosyltransferase 7 (alpha (1,3) fucosyltransferase) | ENST00000314412 | 0,564496196 |
| A_21_P0002510  | TCONS_00004464   | XLOC_002342    |                                                       |                 | 0,564088683 |
| A_21_P0013835  | TCONS_I2_0003061 | XLOC_I2_015830 |                                                       |                 | 0,564001779 |
| A_32_P8221     | NM_000845        | GRM8           | glutamate receptor, metabotropic 8                    | ENST00000489939 | 0,563739633 |
| A_19_P00813436 | NR_039984        | LOC729506      |                                                       |                 | 0,563694505 |
| A_33_P3263902  | NM_005962        | MXI1           | MAX interactor 1                                      | ENST00000393134 | 0,563491708 |
| A_33_P3520835  | AK123449         | FLJ41455       | uncharacterized LOC441441                             |                 | 0,563285875 |
| A_33_P3328937  | NM_001112707     | TLK2           | tousled-like kinase 2                                 | ENST00000542523 | 0,562879778 |
| A_33_P3326812  | AK127768         | LOC100130152   | uncharacterized LOC100130152                          |                 | 0,562778226 |
| A_32_P51848    | NM_019018        | FAM105A        | family with sequence similarity 105, member A         |                 | 0,562674325 |
| A_21_P0013622  | NM_001243372     | CLCN3          | chloride channel 3                                    | ENST00000512813 | 0,562492728 |
| A_23_P109382   | NM_005315        | GSC2           | goosecoid homeobox 2                                  | ENST00000086933 | 0,562342091 |
| A_32_P36235    | NM_004907        | IER2           | immediate early response 2                            | ENST00000292433 | 0,562285472 |
| A_33_P3210916  | ENST00000479868  | SEC13          | SEC13 homolog ( <i>S. cerevisiae</i> )                | ENST00000479868 | 0,562106221 |
| A_19_P00319040 | NR_038948        | LOC100506136   | uncharacterized LOC100506136                          |                 | 0,5614053   |
| A_21_P0006589  | ENST00000425031  | XLOC_008276    |                                                       | ENST00000425031 | 0,561167381 |
| A_23_P121545   | NM_201591        | GPM6A          | glycoprotein M6A                                      | ENST00000280187 | 0,560931178 |
| A_33_P3238651  | NM_001039783     | TXNRD3NB       | thioredoxin reductase 3 neighbor                      | ENST00000404489 | 0,560890193 |
| A_21_P0012609  | TCONS_I2_0002075 | XLOC_I2_010830 |                                                       |                 | 0,560810285 |
| A_33_P3381107  | NM_001004478     | OR10Z1         | olfactory receptor, family 10, subfamily Z, member 1  | ENST00000361284 | 0,5607859   |
| A_21_P0001906  | THC2677671       | XLOC_001632    |                                                       |                 | 0,560333053 |
| A_23_P100420   | NM_015144        | ZCCHC14        | zinc finger, CCHC domain containing 14                | ENST00000268616 | 0,560243634 |
| A_33_P3367606  | NR_026806        | FLJ13224       | uncharacterized LOC79857                              | ENST00000313737 | 0,560108113 |
| A_21_P0013255  | BG168839         | XLOC_I2_013513 |                                                       |                 | 0,560045819 |
| A_23_P156445   | NM_018665        | DDX43          | DEAD (Asp-Glu-Ala-Asp) box polypeptide 43             | ENST00000370336 | 0,559938746 |
| A_21_P0002380  | TCONS_00004095   | XLOC_001931    |                                                       |                 | 0,559900498 |
| A_32_P68148    | NR_027130        | ZNF738         | zinc finger protein 738                               |                 | 0,559413802 |
| A_23_P2801     | NM_172373        | ELF1           | E74-like factor 1 (ets domain transcription factor)   | ENST00000239882 | 0,559360762 |

|               |                 |                |                                                           |                 |  |             |
|---------------|-----------------|----------------|-----------------------------------------------------------|-----------------|--|-------------|
| A_21_P0001751 | TCONS_00002568  | XLOC_001173    |                                                           |                 |  | 0,559142286 |
| A_23_P29124   | NM_000407       | GP1BB          | glycoprotein Ib (platelet), beta polypeptide              | ENST00000366425 |  | 0,55891573  |
| A_33_P3245449 | NR_027420       | LOC389834      | ankyrin repeat domain 57 pseudogene                       |                 |  | 0,558778539 |
| A_32_P488818  | NM_182592       | YIPF7          | Yip1 domain family, member 7                              | ENST00000510035 |  | 0,558527868 |
| A_23_P364792  | NR_045129       | TXLNG2P        | taxilin gamma 2, pseudogene                               | ENST00000251749 |  | 0,558271827 |
| A_23_P383819  | NM_016569       | TBX3           | T-box 3                                                   | ENST00000257566 |  | 0,558254212 |
| A_21_P0013324 | ENST00000412091 | XLOC_I2_013873 |                                                           | ENST00000412091 |  | 0,557968709 |
| A_23_P157766  | NM_001039395    | C9orf68        | chromosome 9 open reading frame 68                        | ENST00000381895 |  | 0,557954983 |
| A_23_P10518   | NM_016521       | TFDP3          | transcription factor Dp family, member 3                  | ENST00000310125 |  | 0,557770199 |
| A_33_P3273767 | ENST00000442973 | GJB7           | gap junction protein, beta 7, 25kDa                       | ENST00000442973 |  | 0,557696832 |
| A_23_P110253  | NM_000222       | KIT            | v-kit Hardy-Zuckerman 4 feline sarcoma viral oncogene hon | ENST00000288135 |  | 0,557657455 |
| A_21_P0003028 | TCONS_00006203  | XLOC_002798    |                                                           |                 |  | 0,557399936 |
| A_21_P0004928 | THC2725080      | XLOC_005442    |                                                           |                 |  | 0,557182512 |
| A_24_P942017  | NR_034127       | LOC100132356   | uncharacterized LOC100132356                              |                 |  | 0,557148841 |
| A_23_P52480   | NM_000772       | CYP2C18        | cytochrome P450, family 2, subfamily C, polypeptide 18    | ENST00000476630 |  | 0,557124828 |
| A_33_P3232277 | NM_004060       | CCNG1          | cyclin G1                                                 | ENST00000511490 |  | 0,556946743 |
| A_23_P114084  | NM_000444       | PHEX           | phosphate regulating endopeptidase homolog, X-linked      | ENST00000537599 |  | 0,55677181  |
| A_32_P111336  | XR_108657       | LOC100131283   | uncharacterized LOC100131283                              |                 |  | 0,556492557 |
| A_21_P0014783 | XR_132565       | FP2234         | uncharacterized LOC100507137                              |                 |  | 0,556418785 |
| A_21_P0011838 | NM_022662       | ANAPC1         | anaphase promoting complex subunit 1                      | ENST00000341068 |  | 0,556344864 |
| A_21_P0000344 | NM_001007074    | RPL32          | ribosomal protein L32                                     | ENST00000396953 |  | 0,556006994 |
| A_21_P0010723 | ENST00000417260 | XLOC_I2_000401 |                                                           | ENST00000417260 |  | 0,555993889 |
| A_33_P3251640 | NR_026956       | LOC284440      | uncharacterized LOC284440                                 |                 |  | 0,555964186 |
| A_33_P3362331 | NM_001037804    | DEFB130        | defensin, beta 130                                        | ENST00000400079 |  | 0,555932835 |
| A_33_P3222728 | NM_025169       | ZNF167         | zinc finger protein 167                                   | ENST00000341840 |  | 0,555535021 |
| A_23_P33196   | NM_000393       | COL5A2         | collagen, type V, alpha 2                                 | ENST00000452536 |  | 0,555356984 |
| A_33_P3861634 | NR_038897       | LOC285084      | uncharacterized LOC285084                                 |                 |  | 0,5550355   |
| A_33_P3222307 | AK125520        | LOC100129380   | uncharacterized LOC100129380                              |                 |  | 0,554837528 |
| A_23_P102242  | NM_022826       | Mar-07         | membrane-associated ring finger (C3HC4) 7                 | ENST00000409175 |  | 0,554553465 |

|                |                 |                |                                                              |                 |             |
|----------------|-----------------|----------------|--------------------------------------------------------------|-----------------|-------------|
| A_24_P99838    | NM_013361       | ZNF223         | zinc finger protein 223                                      | ENST00000434772 | 0,554345794 |
| A_19_P00315693 | NR_002323       | TUG1           |                                                              |                 | 0,554239116 |
| A_21_P0000388  | NR_003072       | SNORD91A       | small nucleolar RNA, C/D box 91A                             |                 | 0,55411644  |
| A_33_P3383065  | NM_001195150    | LOC100130705   | uncharacterized LOC100130705                                 |                 | 0,55405947  |
| A_33_P3296499  | NM_002844       | PTPRK          | protein tyrosine phosphatase, receptor type, K               | ENST00000368202 | 0,553880823 |
| A_23_P164737   | NM_004831       | MED26          | mediator complex subunit 26                                  | ENST00000263390 | 0,553630424 |
| A_21_P0000924  | ENST00000421003 | XLOC_000643    |                                                              | ENST00000421003 | 0,553485623 |
| A_23_P111929   | NM_016023       | OTUD6B         | OTU domain containing 6B                                     | ENST00000524027 | 0,553149288 |
| A_23_P100420   | NM_015144       | ZCCHC14        | zinc finger, CCHC domain containing 14                       | ENST00000268616 | 0,553051207 |
| A_23_P111929   | NM_016023       | OTUD6B         | OTU domain containing 6B                                     | ENST00000524027 | 0,552969241 |
| A_19_P00318561 | XR_108763       | LOC100506516   | uncharacterized LOC100506516                                 | ENST00000414621 | 0,552957408 |
| A_23_P111929   | NM_016023       | OTUD6B         | OTU domain containing 6B                                     | ENST00000524027 | 0,552945562 |
| A_33_P3299565  | NM_001004316    | LEKR1          | leucine, glutamate and lysine rich 1                         | ENST00000470811 | 0,552934441 |
| A_21_P0001096  | ENST00000442889 | XLOC_000691    |                                                              | ENST00000442889 | 0,552797318 |
| A_33_P3646051  | AK094324        | LOC284408      | uncharacterized LOC284408                                    |                 | 0,552692258 |
| A_23_P123108   | ENST00000493453 | AKAP9          | A kinase (PRKA) anchor protein (yotiao) 9                    | ENST00000493453 | 0,551881556 |
| A_33_P3400244  | NM_032752       | ZNF496         | zinc finger protein 496                                      | ENST00000477903 | 0,551855447 |
| A_23_P157679   | NM_032334       | UTP23          | UTP23, small subunit (SSU) processome component, homol       | ENST00000521974 | 0,551854021 |
| A_33_P3280875  | NM_006469       | IVNS1ABP       | influenza virus NS1A binding protein                         | ENST00000392007 | 0,551489307 |
| A_24_P341116   | NR_015340       | SERPINA13      | serpin peptidase inhibitor, clade A (alpha-1 antiproteinase, | ENST00000469935 | 0,551439253 |
| A_23_P131825   | NM_003279       | TNNC2          | troponin C type 2 (fast)                                     | ENST00000372557 | 0,551220253 |
| A_24_P701030   | NR_037157       | C6orf112       | chromosome 6 open reading frame 112                          | ENST00000369122 | 0,551166541 |
| A_24_P764690   | ENST00000544044 | ZNF720         | zinc finger protein 720                                      | ENST00000544044 | 0,551122896 |
| A_21_P0007955  | ENST00000422074 | XLOC_010464    |                                                              | ENST00000422074 | 0,551035959 |
| A_21_P0005718  | TCONS_00014755  | XLOC_006839    |                                                              |                 | 0,550967743 |
| A_23_P100420   | NM_015144       | ZCCHC14        | zinc finger, CCHC domain containing 14                       | ENST00000268616 | 0,550808601 |
| A_21_P0006937  | TCONS_00018388  | XLOC_008668    |                                                              |                 | 0,55065623  |
| A_33_P3231750  | NR_027130       | ZNF738         | zinc finger protein 738                                      | ENST00000311015 | 0,550469854 |
| A_21_P0013539  | ENST00000519714 | XLOC_l2_014219 |                                                              | ENST00000519714 | 0,550194489 |

|               |                   |                |                                                                       |                 |             |
|---------------|-------------------|----------------|-----------------------------------------------------------------------|-----------------|-------------|
| A_33_P3401673 | NM_014030         | GIT1           | G protein-coupled receptor kinase interacting ArfGAP 1                | ENST00000335356 | 0,549878791 |
| A_33_P3222698 | NM_006991         | ZNF197         | zinc finger protein 197                                               | ENST00000396058 | 0,549809765 |
| A_21_P0006030 | ENST00000366188   | XLOC_007464    |                                                                       | ENST00000366188 | 0,549790126 |
| A_21_P0008245 | THC2672324        | XLOC_010541    |                                                                       |                 | 0,549724195 |
| A_21_P0014563 | XR_110312         | LOC100505675   | uncharacterized LOC100505675                                          |                 | 0,549590383 |
| A_21_P0011186 | TCONS_I2_00007209 | XLOC_I2_003992 |                                                                       |                 | 0,549283631 |
| A_23_P111929  | NM_016023         | OTUD6B         | OTU domain containing 6B                                              | ENST00000524027 | 0,549084188 |
| A_23_P67424   | NM_153257         | ZNF461         | zinc finger protein 461                                               | ENST00000396892 | 0,548884248 |
| A_33_P3256168 | NM_001012994      | SNX30          | sorting nexin family member 30                                        | ENST00000416585 | 0,548601168 |
| A_21_P0001030 | ENST00000424181   | XLOC_000468    |                                                                       | ENST00000424181 | 0,548596091 |
| A_21_P0005120 | BG928045          | XLOC_005365    |                                                                       |                 | 0,548529262 |
| A_33_P3251144 | NM_001127370      | CDCA7L         | cell division cycle associated 7-like                                 | ENST00000465490 | 0,548147371 |
| A_33_P3408042 | NM_205859         | OR2K2          | olfactory receptor, family 2, subfamily K, member 2                   | ENST00000374428 | 0,548095649 |
| A_24_P583225  | NR_026999         | LINC00265      | long intergenic non-protein coding RNA 265                            | ENST00000423687 | 0,547970979 |
| A_23_P100420  | NM_015144         | ZCCHC14        | zinc finger, CCHC domain containing 14                                | ENST00000268616 | 0,54764032  |
| A_23_P115861  | NM_145312         | ZNF485         | zinc finger protein 485                                               | ENST00000374437 | 0,547601259 |
| A_21_P0001896 | ENST00000413708   | XLOC_001618    |                                                                       | ENST00000413708 | 0,547517972 |
| A_21_P0012333 | NM_171828         | KCNMB3         | potassium large conductance calcium-activated channel, subunit beta 3 | ENST00000485523 | 0,547473659 |
| A_21_P0011811 | NR_015424         | ANKRD36BP2     | ankyrin repeat domain 36B pseudogene 2                                |                 | 0,546782393 |
| A_33_P3331080 | NM_001252231      | SEC24A         | SEC24 family, member A (S. cerevisiae)                                | ENST00000322887 | 0,546456949 |
| A_21_P0004761 | ENST00000430931   | XLOC_005771    |                                                                       | ENST00000430931 | 0,54645549  |
| A_24_P217848  | NM_003510         | HIST1H2AK      | histone cluster 1, H2ak                                               | ENST00000330180 | 0,546146784 |
| A_33_P3418511 | NR_027756         | HTA            | uncharacterized LOC283902                                             |                 | 0,545170229 |
| A_33_P3219711 | ENST00000534863   | SUMF1          | sulfatase modifying factor 1                                          | ENST00000534863 | 0,545162583 |
| A_23_P355517  | NM_024875         | SYNPO2L        | synaptopodin 2-like                                                   | ENST00000394810 | 0,544605241 |
| A_21_P0013396 | NM_002471         | MYH6           | myosin, heavy chain 6, cardiac muscle, alpha                          | ENST00000413734 | 0,544283145 |
| A_21_P0013724 | ENST00000428709   | XLOC_I2_015195 |                                                                       | ENST00000428709 | 0,544164175 |
| A_23_P100420  | NM_015144         | ZCCHC14        | zinc finger, CCHC domain containing 14                                | ENST00000268616 | 0,543799305 |
| A_33_P3399064 | NR_003285         | RN5-8S1        | RNA, 5.8S ribosomal 1                                                 |                 | 0,543574629 |

|               |                  |                |                                                            |                 |             |
|---------------|------------------|----------------|------------------------------------------------------------|-----------------|-------------|
| A_23_P49145   | NM_152338        | ZG16           | zymogen granule protein 16 homolog (rat)                   | ENST00000400752 | 0,543095257 |
| A_23_P111929  | NM_016023        | OTUD6B         | OTU domain containing 6B                                   | ENST00000524027 | 0,543022147 |
| A_21_P0010767 | ENST00000430316  | XLOC_I2_001064 |                                                            | ENST00000430316 | 0,542864561 |
| A_33_P3385516 | NM_080617        | CBLN4          | cerebellin 4 precursor                                     | ENST00000064571 | 0,542841413 |
| A_33_P3289416 | NM_152458        | ZNF785         | zinc finger protein 785                                    | ENST00000395216 | 0,542349555 |
| A_33_P3423250 | NM_001134888     | RTL1           | retrotransposon-like 1                                     | ENST00000534062 | 0,542271494 |
| A_21_P0011504 | NM_004667        | HERC2          | hect domain and RLD 2                                      | ENST00000433784 | 0,541876798 |
| A_21_P0010602 | NM_014675        | CROCC          | ciliary rootlet coiled-coil, rootletin                     | ENST00000467880 | 0,541834524 |
| A_21_P0014837 | ENST00000508031  | LOC100507388   |                                                            | ENST00000508031 | 0,541633271 |
| A_21_P0012839 | TCONS_I2_0002245 | XLOC_I2_011692 |                                                            |                 | 0,541532493 |
| A_21_P0000259 | NR_002565        | SNORD25        | small nucleolar RNA, C/D box 25                            |                 | 0,541513631 |
| A_21_P0012263 | THC2560238       | XLOC_I2_009332 |                                                            |                 | 0,54143173  |
| A_33_P3331426 | XR_108343        | FLJ37786       | uncharacterized LOC642691                                  |                 | 0,541431294 |
| A_33_P3357007 | NM_001007537     | C1QTNF9B       | C1q and tumor necrosis factor related protein 9B           | ENST00000382057 | 0,54142749  |
| A_24_P358868  | XM_001720936     | ZNF728         | zinc finger protein 728                                    |                 | 0,541407473 |
| A_21_P0003067 | TCONS_00006328   | XLOC_002945    |                                                            |                 | 0,541392599 |
| A_23_P120281  | NM_022336        | EDAR           | ectodysplasin A receptor                                   | ENST00000376651 | 0,541331718 |
| A_33_P3217490 | NR_038388        | LOC729444      | uncharacterized LOC729444                                  | ENST00000415704 | 0,541306808 |
| A_24_P371399  | NM_173552        | C3orf58        | chromosome 3 open reading frame 58                         | ENST00000315691 | 0,541298097 |
| A_23_P381478  | NM_152492        | CCDC27         | coiled-coil domain containing 27                           | ENST00000462521 | 0,541042733 |
| A_33_P3861706 | NM_017762        | MTMR10         | myotubularin related protein 10                            | ENST00000435680 | 0,541029174 |
| A_21_P0007194 | TCONS_00019277   | XLOC_009110    |                                                            |                 | 0,540931842 |
| A_23_P120170  | NM_145702        | TIGD1          | tigger transposable element derived 1                      | ENST00000408957 | 0,540884366 |
| A_23_P117298  | NM_000131        | F7             | coagulation factor VII (serum prothrombin conversion accel | ENST00000346342 | 0,540675762 |
| A_23_P133637  | NM_001040172     | HTR4           | 5-hydroxytryptamine (serotonin) receptor 4                 | ENST00000517929 | 0,540606658 |
| A_23_P378416  | NM_001001996     | GPM6B          | glycoprotein M6B                                           | ENST00000356942 | 0,540373538 |
| A_21_P0010466 | TCONS_00029834   | XLOC_014266    |                                                            |                 | 0,54023406  |
| A_32_P163458  | NM_001004351     | SPDYE3         | speedy homolog E3 (Xenopus laevis)                         | ENST00000426970 | 0,540021514 |
| A_23_P258002  | NM_017632        | CDKN2AIP       | CDKN2A interacting protein                                 | ENST00000504169 | 0,539982821 |



|               |                 |                |                                                                     |                 |             |
|---------------|-----------------|----------------|---------------------------------------------------------------------|-----------------|-------------|
| A_33_P3253069 | ENST00000368053 | MED23          | mediator complex subunit 23                                         | ENST00000368053 | 0,539788601 |
| A_21_P0011225 | ENST00000434565 | XLOC_l2_003944 |                                                                     | ENST00000434565 | 0,539532768 |
| A_23_P94911   | NM_181845       | ZNF283         | zinc finger protein 283                                             | ENST00000324461 | 0,539432973 |
| A_23_P100420  | NM_015144       | ZCCHC14        | zinc finger, CCHC domain containing 14                              | ENST00000268616 | 0,539369573 |
| A_24_P213715  | NR_026993       | LOC90834       | uncharacterized protein BC001742                                    |                 | 0,539110925 |
| A_21_P0005893 | TCONS_00015148  | XLOC_007191    |                                                                     |                 | 0,539015738 |
| A_23_P300124  | NM_144775       | SMCR8          | Smith-Magenis syndrome chromosome region, candidate 8               | ENST00000406438 | 0,538986303 |
| A_24_P13285   | NM_006741       | PPP1R1A        | protein phosphatase 1, regulatory (inhibitor) subunit 1A            | ENST00000257905 | 0,53891194  |
| A_23_P146134  | NM_024025       | DUSP26         | dual specificity phosphatase 26 (putative)                          | ENST00000256261 | 0,538794191 |
| A_24_P52697   | NR_002196       | H19            | H19, imprinted maternally expressed transcript (non-protein coding) |                 | 0,53878661  |
| A_21_P0009189 | AL049275        | DKFZp564H213   | uncharacterized LOC440432                                           |                 | 0,538688316 |
| A_23_P55421   | NM_020649       | CBX8           | chromobox homolog 8                                                 | ENST00000269385 | 0,538512787 |
| A_23_P100420  | NM_015144       | ZCCHC14        | zinc finger, CCHC domain containing 14                              | ENST00000268616 | 0,53850492  |
| A_33_P3378630 | AK097743        | LOC100131195   | uncharacterized LOC100131195                                        |                 | 0,538401327 |
| A_24_P315014  | XR_113307       | XAGE-4         | XAGE-4 protein                                                      |                 | 0,537396418 |
| A_21_P0000389 | NR_003073       | SNORD91B       | small nucleolar RNA, C/D box 91B                                    |                 | 0,53721939  |
| A_23_P87238   | NM_006512       | SAA4           | serum amyloid A4, constitutive                                      | ENST00000524555 | 0,536586609 |
| A_23_P254025  | NM_003408       | ZFP37          | zinc finger protein 37 homolog (mouse)                              | ENST00000555206 | 0,536422786 |
| A_21_P0000279 | NR_002735       | SNORD61        | small nucleolar RNA, C/D box 61                                     |                 | 0,536115176 |
| A_21_P0002107 | ENST00000415918 | XLOC_002339    |                                                                     | ENST00000415918 | 0,536096887 |
| A_21_P0003337 | ENST00000514339 | XLOC_003464    |                                                                     | ENST00000514339 | 0,536086423 |
| A_23_P102242  | NM_022826       | Mar-07         | membrane-associated ring finger (C3HC4) 7                           | ENST00000409175 | 0,535962666 |
| A_33_P3631491 | AF307449        | CECR9          | cat eye syndrome chromosome region, candidate 9 (non-pr             | ENST00000453421 | 0,535870199 |
| A_23_P102242  | NM_022826       | Mar-07         | membrane-associated ring finger (C3HC4) 7                           | ENST00000409175 | 0,535549727 |
| A_23_P107963  | NM_000148       | FUT1           | fucosyltransferase 1 (galactoside 2-alpha-L-fucosyltransferase)     | ENST00000310160 | 0,535373221 |
| A_21_P0011775 | AK125686        | LOC100505851   | uncharacterized LOC100505851                                        |                 | 0,535206196 |
| A_33_P3340961 | AF036272        | SH3GL3         | SH3-domain GRB2-like 3                                              |                 | 0,534989304 |
| A_23_P376870  | NM_174891       | C14orf79       | chromosome 14 open reading frame 79                                 | ENST00000548641 | 0,534960344 |
| A_23_P102242  | NM_022826       | Mar-07         | membrane-associated ring finger (C3HC4) 7                           | ENST00000409175 | 0,534893687 |

|               |                 |                |                                                                  |                 |             |
|---------------|-----------------|----------------|------------------------------------------------------------------|-----------------|-------------|
| A_23_P102242  | NM_022826       | Mar-07         | membrane-associated ring finger (C3HC4) 7                        | ENST00000409175 | 0,534841163 |
| A_24_P92558   | NM_001039891    | ZNF674         | zinc finger protein 674                                          | ENST00000414387 | 0,534744501 |
| A_21_P0000374 | NR_003046       | SNORD59B       | small nucleolar RNA, C/D box 59B                                 |                 | 0,534727685 |
| A_33_P3378126 | NM_058229       | FBXO32         | F-box protein 32                                                 | ENST00000287396 | 0,534700319 |
| A_33_P3523583 | NR_033858       | LOC642924      | uncharacterized LOC642924                                        |                 | 0,534588505 |
| A_21_P0000498 | NR_004397       | SNORD1C        | small nucleolar RNA, C/D box 1C                                  | ENST00000448136 | 0,534508343 |
| A_21_P0002592 | ENST00000415396 | LOC388946      | transmembrane protein ENSP00000343375                            | ENST00000415396 | 0,534487104 |
| A_33_P3416420 | NM_145062       | ZUFSP          | zinc finger with UFM1-specific peptidase domain                  | ENST00000368573 | 0,534470617 |
| A_21_P0010764 | ENST00000424711 | XLOC_I2_001011 |                                                                  | ENST00000424711 | 0,53426098  |
| A_24_P276531  | NM_024700       | SNIP1          | Smad nuclear interacting protein 1                               | ENST00000296215 | 0,533999971 |
| A_21_P0013866 | NR_028379       | FTX            | FTX transcript, XIST regulator (non-protein coding)              |                 | 0,533750315 |
| A_21_P0012712 | ENST00000515691 | XLOC_I2_010586 |                                                                  | ENST00000515691 | 0,533651688 |
| A_23_P344281  | NM_001010879    | ZIK1           | zinc finger protein interacting with K protein 1 homolog (mouse) | ENST00000307468 | 0,533454626 |
| A_33_P3214209 | NR_027027       | GUSBP1         | glucuronidase, beta pseudogene 1                                 | ENST00000508973 | 0,533181933 |
| A_33_P3351356 | ENST00000398560 | ARHGEF10       | Rho guanine nucleotide exchange factor (GEF) 10                  | ENST00000398560 | 0,533110648 |
| A_33_P3307820 | NM_001013623    | C6orf94        | chromosome 6 open reading frame 94                               | ENST00000539295 | 0,532874875 |
| A_23_P100420  | NM_015144       | ZCCHC14        | zinc finger, CCHC domain containing 14                           | ENST00000268616 | 0,532825325 |
| A_21_P0007224 | ENST00000527519 | XLOC_009183    |                                                                  | ENST00000527519 | 0,532498916 |
| A_21_P0009414 | TCONS_00026157  | XLOC_012572    |                                                                  |                 | 0,532363386 |
| A_33_P3228977 | ENST00000382893 | UTY            | ubiquitously transcribed tetratricopeptide repeat gene, Y-lir    | ENST00000382893 | 0,532100742 |
| A_33_P3355743 | NM_018040       | GPATCH2        | G patch domain containing 2                                      | ENST00000366934 | 0,532064567 |
| A_21_P0001968 | ENST00000443971 | XLOC_001852    |                                                                  | ENST00000443971 | 0,532018031 |
| A_24_P169896  | NM_001243541    | LOC100653515   | differential display clone 8                                     | ENST00000475198 | 0,531700192 |
| A_23_P110445  | NM_006051       | APBB3          | amyloid beta (A4) precursor protein-binding, family B, member 3  | ENST00000508496 | 0,531700133 |
| A_23_P44648   | NM_030955       | ADAMTS12       | ADAM metallopeptidase with thrombospondin type 1 motif 12        | ENST00000352040 | 0,531643911 |
| A_21_P0014704 | XR_112198       | LOC100509671   | uncharacterized LOC100509671                                     |                 | 0,531513034 |
| A_21_P0001514 | THC2695938      | XLOC_000852    |                                                                  |                 | 0,53148098  |
| A_23_P29365   | NM_012234       | RYBP           | RING1 and YY1 binding protein                                    | ENST00000477973 | 0,531377891 |
| A_24_P393571  | NM_004293       | GDA            | guanine deaminase                                                | ENST00000358399 | 0,530850818 |

|                |                 |                |                                                          |                 |             |
|----------------|-----------------|----------------|----------------------------------------------------------|-----------------|-------------|
| A_33_P3304377  | NM_002454       | MTRR           | 5-methyltetrahydrofolate-homocysteine methyltransferase  | ENST00000341013 | 0,530534662 |
| A_33_P3375527  | NM_152622       | MIER3          | mesoderm induction early response 1, family member 3     | ENST00000381213 | 0,530511022 |
| A_33_P3423420  | NM_024702       | ZNF750         | zinc finger protein 750                                  | ENST00000269394 | 0,530467574 |
| A_32_P20523    | NM_145715       | TIGD2          | tigger transposable element derived 2                    | ENST00000317005 | 0,530361588 |
| A_24_P285522   | NM_003618       | MAP4K3         | mitogen-activated protein kinase kinase kinase kinase 3  | ENST00000536018 | 0,530204007 |
| A_21_P0003172  | TCONS_00007259  | XLOC_003243    |                                                          |                 | 0,529980926 |
| A_23_P94879    | NM_000506       | F2             | coagulation factor II (thrombin)                         | ENST00000311907 | 0,529772772 |
| A_23_P159741   | NM_017745       | BCOR           | BCL6 corepressor                                         | ENST00000342274 | 0,529614278 |
| A_33_P3365352  | AK124173        | LOC100130476   | uncharacterized LOC100130476                             |                 | 0,529598587 |
| A_21_P0003942  | ENST00000507389 | XLOC_005005    |                                                          | ENST00000507389 | 0,529562728 |
| A_23_P5586     | NM_005791       | MPHOSPH10      | M-phase phosphoprotein 10 (U3 small nucleolar ribonucleo | ENST00000476969 | 0,529555652 |
| A_21_P0014687  | NM_000296       | PKD1           | polycystic kidney disease 1 (autosomal dominant)         | ENST00000439623 | 0,5291743   |
| A_33_P3331085  | NM_021982       | SEC24A         | SEC24 family, member A (S. cerevisiae)                   | ENST00000398844 | 0,529089302 |
| A_23_P112086   | NM_021010       | DEFA5          | defensin, alpha 5, Paneth cell-specific                  | ENST00000330590 | 0,528944487 |
| A_21_P0007203  | TCONS_00019285  | XLOC_009118    |                                                          |                 | 0,52886515  |
| A_21_P0002312  | TCONS_00003930  | XLOC_001745    |                                                          |                 | 0,528851207 |
| A_23_P36882    | NM_006183       | NTS            | neurotensin                                              | ENST00000256010 | 0,528754383 |
| A_19_P00320400 | NR_038988       | LOC100287765   |                                                          |                 | 0,528688341 |
| A_21_P0013193  | NR_026873       | LINC00174      | long intergenic non-protein coding RNA 174               | ENST00000416572 | 0,528637643 |
| A_21_P0006439  | ENST00000430235 | XLOC_008099    |                                                          | ENST00000430235 | 0,528583773 |
| A_21_P0014240  | XR_108990       | LOC100288449   | uncharacterized LOC100288449                             |                 | 0,52857613  |
| A_23_P160689   | NM_018372       | LRIF1          | ligand dependent nuclear receptor interacting factor 1   | ENST00000485275 | 0,528482696 |
| A_33_P3360087  | NM_014451       | BBS9           | Bardet-Biedl syndrome 9                                  | ENST00000396125 | 0,528470722 |
| A_33_P3266429  | NM_001010971    | SAMD13         | sterile alpha motif domain containing 13                 | ENST00000370671 | 0,528417509 |
| A_24_P223163   | NM_138386       | NAF1           | nuclear assembly factor 1 homolog (S. cerevisiae)        | ENST00000422287 | 0,52837043  |
| A_33_P3358893  | NM_002762       | PRM2           | protamine 2                                              | ENST00000241808 | 0,528193032 |
| A_21_P0001297  | TCONS_00000942  | XLOC_000194    |                                                          |                 | 0,52799699  |
| A_21_P0013391  | ENST00000419226 | XLOC_I2_013506 |                                                          | ENST00000419226 | 0,52771357  |
| A_21_P0012371  | CR624823        | LOC645206      | uncharacterized LOC645206                                |                 | 0,527476119 |

|               |                 |                |                                                         |                 |             |
|---------------|-----------------|----------------|---------------------------------------------------------|-----------------|-------------|
| A_23_P105118  | NM_001005237    | OR51G1         | olfactory receptor, family 51, subfamily G, member 1    | ENST00000321961 | 0,526902824 |
| A_23_P35414   | NM_005398       | PPP1R3C        | protein phosphatase 1, regulatory subunit 3C            | ENST00000238994 | 0,526857658 |
| A_21_P0014916 | XR_133082       | LOC100509507   | putative uncharacterized protein C14orf165-like         |                 | 0,52678577  |
| A_23_P102242  | NM_022826       | Mar-07         | membrane-associated ring finger (C3HC4) 7               | ENST00000409175 | 0,5264471   |
| A_33_P3371910 | NM_138394       | HNRPLL         | heterogeneous nuclear ribonucleoprotein L-like          | ENST00000358367 | 0,5263753   |
| A_21_P0002468 | TCONS_00004321  | XLOC_002186    |                                                         |                 | 0,526309428 |
| A_23_P111929  | NM_016023       | OTUD6B         | OTU domain containing 6B                                | ENST00000524027 | 0,526154012 |
| A_33_P3261197 | NM_002486       | NCBP1          | nuclear cap binding protein subunit 1, 80kDa            | ENST00000478100 | 0,525895587 |
| A_33_P3270109 | NM_138792       | LEO1           | Leo1, Paf1/RNA polymerase II complex component, homolog | ENST00000315141 | 0,525862873 |
| A_24_P382401  | NM_153358       | ZNF791         | zinc finger protein 791                                 | ENST00000393303 | 0,525818907 |
| A_21_P0014289 | XR_109157       | LOC100505533   | uncharacterized LOC100505533                            |                 | 0,525812937 |
| A_23_P102242  | NM_022826       | Mar-07         | membrane-associated ring finger (C3HC4) 7               | ENST00000409175 | 0,525732146 |
| A_23_P81760   | NM_006775       | QKI            | QKI, KH domain containing, RNA binding                  | ENST00000540719 | 0,525684865 |
| A_21_P0012807 | ENST00000511993 | XLOC_l2_011309 |                                                         | ENST00000511993 | 0,525355684 |
| A_33_P3421748 | ENST00000381679 | SON            | SON DNA binding protein                                 | ENST00000381679 | 0,525280984 |
| A_21_P0007334 | ENST00000444572 | DCDC5          | doublecortin domain containing 5                        | ENST00000444572 | 0,525182293 |
| A_23_P102242  | NM_022826       | Mar-07         | membrane-associated ring finger (C3HC4) 7               | ENST00000409175 | 0,525074112 |
| A_23_P169503  | NM_001807       | CEL            | carboxyl ester lipase (bile salt-stimulated lipase)     | ENST00000411440 | 0,524997276 |
| A_23_P140190  | NR_026800       | KIAA0125       | KIAA0125                                                | ENST00000484511 | 0,524996688 |
| A_21_P0003280 | TCONS_00007127  | XLOC_003061    |                                                         |                 | 0,524971361 |
| A_33_P3252635 | NM_203282       | ZNF254         | zinc finger protein 254                                 | ENST00000339642 | 0,524967806 |
| A_23_P100420  | NM_015144       | ZCCHC14        | zinc finger, CCHC domain containing 14                  | ENST00000268616 | 0,524935106 |
| A_21_P0011857 | XR_109900       | LOC100131316   | uncharacterized LOC100131316                            |                 | 0,524811436 |
| A_23_P371824  | NM_020127       | TUFT1          | tuftelin 1                                              | ENST00000507671 | 0,524749577 |
| A_23_P100420  | NM_015144       | ZCCHC14        | zinc finger, CCHC domain containing 14                  | ENST00000268616 | 0,524341905 |
| A_33_P3282597 | ENST00000399707 | C18orf45       | chromosome 18 open reading frame 45                     | ENST00000399707 | 0,524148284 |
| A_23_P120170  | NM_145702       | TIGD1          | tigger transposable element derived 1                   | ENST00000408957 | 0,523996262 |
| A_33_P3322499 | NR_028594       | ZNF833P        | zinc finger protein 833, pseudogene                     | ENST00000344893 | 0,523872395 |
| A_23_P44207   | NM_130767       | ACOT12         | acyl-CoA thioesterase 12                                | ENST00000506440 | 0,523720336 |

|                |                 |                |                                                                 |                 |             |
|----------------|-----------------|----------------|-----------------------------------------------------------------|-----------------|-------------|
| A_23_P111395   | NM_003058       | SLC22A2        | solute carrier family 22 (organic cation transporter), member 2 | ENST00000498556 | 0,523505249 |
| A_23_P102242   | NM_022826       | Mar-07         | membrane-associated ring finger (C3HC4) 7                       | ENST00000409175 | 0,523493026 |
| A_23_P114084   | NM_000444       | PHEX           | phosphate regulating endopeptidase homolog, X-linked            | ENST00000537599 | 0,5234477   |
| A_21_P0008072  | TCONS_00021811  | XLOC_010411    |                                                                 |                 | 0,523203731 |
| A_33_P3228757  | NM_001144989    | ZNF814         | zinc finger protein 814                                         | ENST00000376205 | 0,523069146 |
| A_24_P101786   | NM_001083953    | THADA          | thyroid adenoma associated                                      | ENST00000474159 | 0,522981801 |
| A_21_P0011319  | NM_020759       | STARD9         | StAR-related lipid transfer (START) domain containing 9         | ENST00000290607 | 0,522804833 |
| A_23_P117095   | NM_020638       | FGF23          | fibroblast growth factor 23                                     | ENST00000237837 | 0,52279014  |
| A_33_P3245454  | NR_027420       | LOC389834      | ankyrin repeat domain 57 pseudogene                             |                 | 0,522473863 |
| A_21_P0000037  | NM_001163391    | ZSCAN12        | zinc finger and SCAN domain containing 12                       |                 | 0,522424035 |
| A_21_P0012356  | BC040576        | XLOC_I2_009504 |                                                                 |                 | 0,522281261 |
| A_33_P3323384  | NM_015713       | RRM2B          | ribonucleotide reductase M2 B (TP53 inducible)                  | ENST00000535248 | 0,522211878 |
| A_21_P0003397  | ENST00000503950 | XLOC_003680    |                                                                 | ENST00000503950 | 0,521861414 |
| A_21_P0000348  | NR_002996       | SNORA80        | small nucleolar RNA, H/ACA box 80                               |                 | 0,521762098 |
| A_21_P0005731  | TCONS_00014788  | XLOC_006862    |                                                                 |                 | 0,521537754 |
| A_23_P58538    | NR_015370       | EPB41L4A-AS1   | EPB41L4A antisense RNA 1 (non-protein coding)                   |                 | 0,521516419 |
| A_23_P363203   | NR_028288       | TCL6           | T-cell leukemia/lymphoma 6 (non-protein coding)                 | ENST00000461160 | 0,521423399 |
| A_21_P0012835  | THC2630830      | XLOC_I2_011649 |                                                                 |                 | 0,521371012 |
| A_21_P0009345  | AK094767        | FLJ37448       | uncharacterized LOC400612                                       |                 | 0,521364147 |
| A_21_P0013194  | NR_039983       | LOC729737      | uncharacterized LOC729737                                       | ENST00000423728 | 0,521359342 |
| A_19_P00803960 | NR_034075       | LOC100499177   | uncharacterized LOC100499177                                    | ENST00000504520 | 0,521033575 |
| A_23_P120170   | NM_145702       | TIGD1          | tigger transposable element derived 1                           | ENST00000408957 | 0,520973634 |
| A_23_P101811   | NM_021030       | ZNF14          | zinc finger protein 14                                          | ENST00000344099 | 0,520947489 |
| A_33_P3358712  | NR_027390       | POLR2M         | polymerase (RNA) II (DNA directed) polypeptide M                | ENST00000464277 | 0,520832667 |
| A_23_P139600   | NM_004658       | RASAL1         | RAS protein activator like 1 (GAP1 like)                        | ENST00000446861 | 0,520659654 |
| A_23_P23102    | NM_145238       | ZSCAN20        | zinc finger and SCAN domain containing 20                       | ENST00000326544 | 0,520595535 |
| A_21_P0001442  | TCONS_00001333  | XLOC_000628    |                                                                 |                 | 0,520481492 |
| A_24_P785293   | NR_003098       | SNHG1          | small nucleolar RNA host gene 1 (non-protein coding)            |                 | 0,520377882 |
| A_21_P0000257  | NR_002563       | SNORD27        | small nucleolar RNA, C/D box 27                                 |                 | 0,520360018 |



|               |                   |                |                                                               |                 |             |
|---------------|-------------------|----------------|---------------------------------------------------------------|-----------------|-------------|
| A_23_P126486  | NR_026752         | CROCCP2        | ciliary rootlet coiled-coil, rootletin pseudogene 2           |                 | 0,520322357 |
| A_24_P944427  | NM_001080517      | SETD5          | SET domain containing 5                                       | ENST00000402466 | 0,520000203 |
| A_33_P3647427 | X52357            | ZNF29P         | zinc finger protein 29, pseudogene                            |                 | 0,519903286 |
| A_33_P3367811 | AL137530          | CCDC57         | coiled-coil domain containing 57                              |                 | 0,519786015 |
| A_24_P106502  | NM_013397         | PRICKLE4       | prickle homolog 4 (Drosophila)                                | ENST00000359201 | 0,519276676 |
| A_32_P103614  | XR_109015         | LOC100128511   | uncharacterized LOC100128511                                  | ENST00000417845 | 0,518723082 |
| A_21_P0013637 | CB121594          | XLOC_I2_015178 |                                                               |                 | 0,518500136 |
| A_21_P0006472 | ENST00000433825   | XLOC_008263    |                                                               | ENST00000433825 | 0,518250683 |
| A_23_P45185   | NM_004469         | FIGF           | c-fos induced growth factor (vascular endothelial growth fa   | ENST00000297904 | 0,517933965 |
| A_21_P0012985 | ENST00000505637   | XLOC_I2_012023 |                                                               | ENST00000505637 | 0,517568507 |
| A_21_P0010084 | NR_026885         | LOC100270804   | uncharacterized LOC100270804                                  |                 | 0,517454658 |
| A_23_P14184   | NM_018676         | THSD1          | thrombospondin, type I, domain containing 1                   | ENST00000258613 | 0,517340976 |
| A_33_P3326588 | NM_003840         | TNFRSF10D      | tumor necrosis factor receptor superfamily, member 10d, d     | ENST00000312584 | 0,51700244  |
| A_21_P0014388 | ENST00000545324   | DNM2           | dynamain 2                                                    | ENST00000545324 | 0,516836078 |
| A_21_P0012678 | TCONS_I2_00021279 | XLOC_I2_011244 |                                                               |                 | 0,516836065 |
| A_24_P76995   | NM_015336         | ZDHC17         | zinc finger, DHHC-type containing 17                          | ENST00000551407 | 0,516520594 |
| A_23_P215534  | NM_053043         | RBM33          | RNA binding motif protein 33                                  | ENST00000307403 | 0,516409107 |
| A_33_P3366859 | NM_001187         | BAGE           | B melanoma antigen                                            | ENST00000470054 | 0,516344426 |
| A_24_P264166  | NR_033351         | GOLGA8F        | golgin A8 family, member F                                    | ENST00000524859 | 0,516063259 |
| A_21_P0004005 | NR_028509         | PART1          | prostate androgen-regulated transcript 1 (non-protein coding) |                 | 0,515903071 |
| A_21_P0002483 | XR_109933         | LOC100506473   | uncharacterized LOC100506473                                  |                 | 0,515882329 |
| A_23_P74981   | NM_033213         | ZNF670         | zinc finger protein 670                                       | ENST00000366503 | 0,515817464 |
| A_23_P46396   | NM_021190         | PTBP2          | polypyrimidine tract binding protein 2                        | ENST00000394176 | 0,51570538  |
| A_21_P0004847 | TCONS_00011710    | XLOC_005188    |                                                               |                 | 0,515471442 |
| A_33_P3214432 | NM_080660         | ZC3HAV1L       | zinc finger CCCH-type, antiviral 1-like                       | ENST00000358573 | 0,5154045   |
| A_21_P0000512 | NR_024343         | SNAR-I         | small ILF3/NF90-associated RNA I                              |                 | 0,515207509 |
| A_21_P0007483 | ENST00000539019   | SSPN           | sarcospan (Kras oncogene-associated gene)                     | ENST00000539019 | 0,515189328 |
| A_24_P97687   | NM_000524         | HTR1A          | 5-hydroxytryptamine (serotonin) receptor 1A                   | ENST00000323865 | 0,515003453 |
| A_33_P3262794 | NM_017661         | ZNF280D        | zinc finger protein 280D                                      | ENST00000396245 | 0,514853115 |



|               |                 |                |                                                            |                 |             |
|---------------|-----------------|----------------|------------------------------------------------------------|-----------------|-------------|
| A_21_P0000377 | NR_003054       | SNORD65        | small nucleolar RNA, C/D box 65                            |                 | 0,514823876 |
| A_33_P3316313 | NM_182501       | MTERFD2        | MTERF domain containing 2                                  | ENST00000391980 | 0,514684985 |
| A_21_P0002401 | TCONS_00004139  | XLOC_001983    |                                                            |                 | 0,514341286 |
| A_23_P167882  | NM_052872       | IL17F          | interleukin 17F                                            | ENST00000478427 | 0,514259429 |
| A_33_P3345623 | NM_001003700    | RREB1          | ras responsive element binding protein 1                   | ENST00000334984 | 0,514221118 |
| A_23_P60657   | NM_015203       | RPRD2          | regulation of nuclear pre-mRNA domain containing 2         | ENST00000492220 | 0,514182827 |
| A_24_P169544  | NM_006959       | ZNF17          | zinc finger protein 17                                     | ENST00000307658 | 0,514145225 |
| A_21_P0001827 | ENST00000414086 | XLOC_001355    |                                                            | ENST00000414086 | 0,514118998 |
| A_23_P134204  | NM_032599       | FAM71F1        | family with sequence similarity 71, member F1              | ENST00000484425 | 0,513884128 |
| A_21_P0003099 | TCONS_00006403  | XLOC_003027    |                                                            |                 | 0,513763919 |
| A_32_P33434   | NM_001199814    | ZNF812         | zinc finger protein 812                                    | ENST00000457674 | 0,513637603 |
| A_33_P3260605 | NM_003798       | CTNNAL1        | catenin (cadherin-associated protein), alpha-like 1        | ENST00000374593 | 0,51331825  |
| A_23_P85015   | NM_000898       | MAOB           | monoamine oxidase B                                        | ENST00000378069 | 0,513167223 |
| A_33_P3270793 | NM_145175       | FAM84A         | family with sequence similarity 84, member A               | ENST00000359969 | 0,513081429 |
| A_21_P0014601 | ENST00000466213 | SFPQ           | splicing factor proline/glutamine-rich                     | ENST00000466213 | 0,51302382  |
| A_23_P380754  | NM_002769       | PRSS1          | protease, serine, 1 (trypsin 1)                            | ENST00000485223 | 0,51294378  |
| A_33_P3399638 | NM_033468       | ZNF257         | zinc finger protein 257                                    | ENST00000435820 | 0,512871835 |
| A_21_P0013219 | BI830525        | XLOC_I2_013456 |                                                            |                 | 0,512789815 |
| A_24_P152527  | NM_006373       | VAT1           | vesicle amine transport protein 1 homolog (T. californica) | ENST00000315674 | 0,512787359 |
| A_33_P3227482 | AK125932        | FLJ43944       | FLJ43944 protein                                           |                 | 0,512676075 |
| A_21_P0010955 | NR_028134       | GUCY2GP        | guanylate cyclase 2G homolog (mouse), pseudogene           |                 | 0,512380551 |
| A_21_P0003106 | TCONS_00006455  | XLOC_003065    |                                                            |                 | 0,512246771 |
| A_23_P354894  | NM_152603       | ZNF567         | zinc finger protein 567                                    | ENST00000360729 | 0,512113241 |
| A_21_P0009386 | TCONS_00025888  | XLOC_012162    |                                                            |                 | 0,512007659 |
| A_33_P3251821 | NR_003545       | C5orf44        | chromosome 5 open reading frame 44                         | ENST00000510585 | 0,511694409 |
| A_21_P0012989 | ENST00000503882 | XLOC_I2_012054 |                                                            | ENST00000503882 | 0,511673071 |
| A_23_P327156  | NR_024334       | LOC645431      | uncharacterized LOC645431                                  |                 | 0,51157041  |
| A_33_P3263569 | NM_152763       | AKNAD1         | AKNA domain containing 1                                   | ENST00000474186 | 0,511489218 |
| A_21_P0005577 | TCONS_00014217  | XLOC_006258    |                                                            |                 | 0,511222411 |

|                |                  |                |                                                    |                 |  |             |
|----------------|------------------|----------------|----------------------------------------------------|-----------------|--|-------------|
| A_21_P0010593  | TCONS_I2_0000096 | XLOC_I2_000727 |                                                    |                 |  | 0,510940865 |
| A_33_P3306146  | NM_001145031     | PLAU           | plasminogen activator, urokinase                   | ENST00000372761 |  | 0,510907559 |
| A_21_P0003480  | ENST00000510744  | XLOC_003988    |                                                    | ENST00000510744 |  | 0,510814948 |
| A_21_P0009251  | TCONS_00025417   | XLOC_012226    |                                                    |                 |  | 0,5106998   |
| A_19_P00316914 | AK058184         | LOC148638      | uncharacterized LOC148638                          |                 |  | 0,510693964 |
| A_33_P3242909  | NM_145276        | ZNF563         | zinc finger protein 563                            | ENST00000318168 |  | 0,510543411 |
| A_21_P0005389  | THC2730801       | XLOC_006123    |                                                    |                 |  | 0,510528603 |
| A_33_P3220723  | NM_015196        | KIAA0922       | KIAA0922                                           | ENST00000440693 |  | 0,510506817 |
| A_23_P337875   | NM_001040202     | PAQR3          | progesterin and adiponQ receptor family member III | ENST00000508599 |  | 0,510218813 |
| A_21_P0007394  | TCONS_00019749   | XLOC_009543    |                                                    |                 |  | 0,510196141 |
| A_21_P0004938  | TCONS_00011947   | XLOC_005460    |                                                    |                 |  | 0,510129022 |
| A_19_P00317910 | ENST00000427109  | XLOC_I2_015034 |                                                    | ENST00000427109 |  | 0,510101609 |
| A_21_P0000268  | NR_002584        | SNORA69        | small nucleolar RNA, H/ACA box 69                  | ENST00000477403 |  | 0,510036502 |
| A_21_P0000207  | NR_000007        | SNORD73A       | small nucleolar RNA, C/D box 73A                   | ENST00000322686 |  | 0,509865212 |
| A_23_P120170   | NM_145702        | TIGD1          | tigger transposable element derived 1              | ENST00000408957 |  | 0,509779121 |
| A_33_P3380196  | BC015533         | AKAP9          | A kinase (PRKA) anchor protein (yotiao) 9          | ENST00000394564 |  | 0,509644578 |
| A_23_P56298    | NM_025189        | ZNF430         | zinc finger protein 430                            | ENST00000261560 |  | 0,509545586 |
| A_33_P3270509  | NM_003031        | SIAH1          | seven in absentia homolog 1 (Drosophila)           | ENST00000356721 |  | 0,509332412 |
| A_21_P0005532  | TCONS_00013978   | XLOC_006617    |                                                    |                 |  | 0,509272102 |
| A_21_P0014904  | XR_132901        | LOC100652738   | uncharacterized LOC100652738                       |                 |  | 0,509218762 |
| A_32_P180741   | NM_001010938     | TNK2           | tyrosine kinase, non-receptor, 2                   | ENST00000430929 |  | 0,508999201 |
| A_33_P3384260  | ENST00000546500  | HNRNPA1        | heterogeneous nuclear ribonucleoprotein A1         | ENST00000546500 |  | 0,508948225 |
| A_21_P0005468  | TCONS_00013686   | XLOC_006348    |                                                    |                 |  | 0,508565581 |
| A_21_P0009822  | ENST00000418739  | XLOC_013439    |                                                    | ENST00000418739 |  | 0,508520871 |
| A_24_P71439    | NM_015317        | PUM2           | pumilio homolog 2 (Drosophila)                     | ENST00000403432 |  | 0,508459357 |
| A_21_P0004718  | ENST00000397717  | NQO2           | NAD(P)H dehydrogenase, quinone 2                   | ENST00000397717 |  | 0,508152943 |
| A_33_P3365815  | AK057458         | LOC729866      | hCG1994895                                         |                 |  | 0,508039878 |
| A_19_P00322002 | NR_015431        | FLJ43663       | uncharacterized LOC378805                          |                 |  | 0,508028072 |
| A_23_P27822    | NM_018025        | GPATCH1        | G patch domain containing 1                        | ENST00000170564 |  | 0,508005157 |

|               |                   |                |                                                           |                 |             |
|---------------|-------------------|----------------|-----------------------------------------------------------|-----------------|-------------|
| A_33_P3405946 | NM_184234         | RBM39          | RNA binding motif protein 39                              | ENST00000465158 | 0,50798989  |
| A_33_P3383724 | NM_001012414      | TRIM61         | tripartite motif containing 61                            | ENST00000329314 | 0,50796438  |
| A_23_P7976    | NM_005321         | HIST1H1E       | histone cluster 1, H1e                                    | ENST00000304218 | 0,507956027 |
| A_33_P3232203 | ENST00000478615   | SAG            | S-antigen; retina and pineal gland (arrestin)             | ENST00000478615 | 0,50790086  |
| A_33_P3465703 | BF304636          | SNORA60        | small nucleolar RNA, H/ACA box 60                         |                 | 0,507838982 |
| A_21_P0002374 | TCONS_00004060    | XLOC_001908    |                                                           |                 | 0,507828015 |
| A_21_P0000839 | NR_038923         | LOC254100      | uncharacterized LOC254100                                 |                 | 0,507739875 |
| A_21_P0002425 | BX119243          | XLOC_002060    |                                                           |                 | 0,507631816 |
| A_21_P0013332 | NR_003666         | SPDYE7P        | speedy homolog E7 ( <i>Xenopus laevis</i> ), pseudogene   | ENST00000489778 | 0,507572456 |
| A_23_P112874  | NM_004466         | GPC5           | glypican 5                                                | ENST00000377067 | 0,507455541 |
| A_24_P15325   | AJ301560          | XKR6           | XK, Kell blood group complex subunit-related family, memb | ENST00000297303 | 0,507237576 |
| A_23_P58251   | NM_001014448      | CPZ            | carboxypeptidase Z                                        | ENST00000514302 | 0,507042449 |
| A_23_P377996  | NM_178532         | RNF180         | ring finger protein 180                                   | ENST00000296615 | 0,506997076 |
| A_33_P3214293 | NM_000945         | PPP3R1         | protein phosphatase 3, regulatory subunit B, alpha        | ENST00000234310 | 0,506916181 |
| A_23_P109254  | NM_184234         | RBM39          | RNA binding motif protein 39                              | ENST00000465158 | 0,506794859 |
| A_32_P207428  | NM_138374         | ZNF845         | zinc finger protein 845                                   | ENST00000427984 | 0,506750244 |
| A_21_P0002933 | TCONS_00005953    | XLOC_002587    |                                                           |                 | 0,506621889 |
| A_23_P110764  | NM_006790         | MYOT           | myotilin                                                  | ENST00000421631 | 0,506598129 |
| A_33_P3238330 | NM_176782         | FAM151A        | family with sequence similarity 151, member A             | ENST00000371304 | 0,506190117 |
| A_23_P109254  | NM_184234         | RBM39          | RNA binding motif protein 39                              | ENST00000465158 | 0,505965255 |
| A_23_P101811  | NM_021030         | ZNF14          | zinc finger protein 14                                    | ENST00000344099 | 0,505954402 |
| A_33_P3245679 | XR_110372         | LOC100129940   | uncharacterized LOC100129940                              | ENST00000356215 | 0,505873027 |
| A_23_P61674   | NM_020666         | CLK4           | CDC-like kinase 4                                         | ENST00000520878 | 0,505732673 |
| A_33_P3666817 | NM_001001791      | C10orf55       | chromosome 10 open reading frame 55                       | ENST00000412307 | 0,505673069 |
| A_33_P3329098 | NM_004906         | WTAP           | Wilms tumor 1 associated protein                          | ENST00000358372 | 0,505625516 |
| A_23_P102242  | NM_022826         | Mar-07         | membrane-associated ring finger (C3HC4) 7                 | ENST00000409175 | 0,505305131 |
| A_33_P3220818 | NM_001201338      | SAFB           | scaffold attachment factor B                              | ENST00000433404 | 0,505290376 |
| A_23_P101811  | NM_021030         | ZNF14          | zinc finger protein 14                                    | ENST00000344099 | 0,505235918 |
| A_21_P0010622 | TCONS_I2_00001279 | XLOC_I2_000941 |                                                           |                 | 0,504866266 |

|               |                 |                |                                                       |                 |  |             |
|---------------|-----------------|----------------|-------------------------------------------------------|-----------------|--|-------------|
| A_21_P0008147 | TCONS_00021980  | XLOC_010582    |                                                       |                 |  | 0,50480746  |
| A_33_P3367396 | NM_207468       | FAM177B        | family with sequence similarity 177, member B         | ENST00000360827 |  | 0,504639814 |
| A_21_P0010641 | ENST00000430107 | XLOC_I2_001064 |                                                       | ENST00000430107 |  | 0,504549785 |
| A_21_P0007993 | ENST00000452288 | XLOC_010606    |                                                       | ENST00000452288 |  | 0,504533882 |
| A_21_P0009150 | NR_040050       | LOC100507351   | uncharacterized LOC100507351                          |                 |  | 0,50450679  |
| A_21_P0002415 | TCONS_00004183  | XLOC_002024    |                                                       |                 |  | 0,504326123 |
| A_33_P3233764 | NM_004690       | LATS1          | LATS, large tumor suppressor, homolog 1 (Drosophila)  | ENST00000392273 |  | 0,50419701  |
| A_24_P822704  | NM_001005209    | TMEM198        | transmembrane protein 198                             | ENST00000344458 |  | 0,504024924 |
| A_21_P0012288 | ENST00000443839 | XLOC_I2_009469 |                                                       | ENST00000443839 |  | 0,50397519  |
| A_23_P50697   | NM_006905       | PSG1           | pregnancy specific beta-1-glycoprotein 1              | ENST00000270059 |  | 0,503870494 |
| A_33_P3271930 | NM_153824       | PYCR1          | pyrroline-5-carboxylate reductase 1                   | ENST00000402252 |  | 0,503848538 |
| A_21_P0013856 | THC2516011      | XLOC_I2_015641 |                                                       |                 |  | 0,503718834 |
| A_23_P31798   | NM_000015       | NAT2           | N-acetyltransferase 2 (arylamine N-acetyltransferase) | ENST00000286479 |  | 0,503684616 |
| A_21_P0007959 | AF339799        | XLOC_010477    |                                                       | ENST00000434547 |  | 0,503656993 |
| A_21_P0011361 | ENST00000327271 | XLOC_I2_004859 |                                                       | ENST00000327271 |  | 0,503435388 |
| A_21_P0003630 | THC2706940      | XLOC_003613    |                                                       |                 |  | 0,503393681 |
| A_24_P323754  | XR_109960       | LOC100131510   | uncharacterized LOC100131510                          |                 |  | 0,503018541 |
| A_21_P0007778 | TCONS_00020968  | XLOC_010238    |                                                       |                 |  | 0,502861452 |
| A_21_P0009766 | TCONS_00027327  | XLOC_013323    |                                                       |                 |  | 0,502831149 |
| A_23_P109254  | NM_184234       | RBM39          | RNA binding motif protein 39                          | ENST00000465158 |  | 0,502764438 |
| A_21_P0000603 | NR_033769       | ASB9P1         | ankyrin repeat and SOCS box containing 9 pseudogene 1 |                 |  | 0,502675561 |
| A_21_P0008831 | TCONS_00023976  | XLOC_011305    |                                                       |                 |  | 0,502344879 |
| A_21_P0009225 | TCONS_00025313  | XLOC_012116    |                                                       |                 |  | 0,502336042 |
| A_21_P0000285 | NR_002744       | SNORD49A       | small nucleolar RNA, C/D box 49A                      |                 |  | 0,502327953 |
| A_21_P0013436 | ENST00000442578 | XLOC_I2_013873 |                                                       | ENST00000442578 |  | 0,502291061 |
| A_33_P3305058 | ENST00000451399 | CUL9           | cullin 9                                              | ENST00000451399 |  | 0,50224831  |
| A_21_P0014284 | ENST00000551357 | LOC100506452   |                                                       | ENST00000551357 |  | 0,502024615 |
| A_23_P24104   | NM_002658       | PLAU           | plasminogen activator, urokinase                      | ENST00000496777 |  | 0,501952044 |
| A_23_P95594   | NM_000662       | NAT1           | N-acetyltransferase 1 (arylamine N-acetyltransferase) | ENST00000520546 |  | 0,501755903 |

|               |                                 |                |                                                                |                 |              |
|---------------|---------------------------------|----------------|----------------------------------------------------------------|-----------------|--------------|
| A_33_P3340014 | NM_016157                       | TRO            | trophinin                                                      | ENST00000474933 | 0,501595581  |
| A_33_P3410449 | NM_153334                       | SCARF2         | scavenger receptor class F, member 2                           | ENST00000341328 | 0,501383249  |
| A_33_P3218138 | NM_000937                       | POLR2A         | polymerase (RNA) II (DNA directed) polypeptide A, 220kDa       | ENST00000322644 | 0,501372987  |
| A_33_P3380783 | AK128032                        | LOC100128184   | uncharacterized LOC100128184                                   |                 | 0,501325377  |
| A_33_P3270519 | NM_033088                       | FAM40A         | family with sequence similarity 40, member A                   | ENST00000369794 | 0,500776589  |
| A_33_P3290443 | NR_002569                       | SCARNA9        | small Cajal body-specific RNA 9                                | ENST00000530422 | 0,500746553  |
| A_33_P3215906 | NM_001039703                    | NBPF10         | neuroblastoma breakpoint family, member 10                     | ENST00000414710 | 0,50066682   |
| A_21_P0000932 | CR606964                        | XLOC_000929    |                                                                |                 | 0,500609618  |
| A_21_P0012881 | TCONS_I2_0002274;XLOC_I2_011908 |                |                                                                |                 | 0,500593547  |
| A_23_P107744  | NM_030760                       | S1PR5          | sphingosine-1-phosphate receptor 5                             | ENST00000359134 | 0,500578473  |
| A_23_P109254  | NM_184234                       | RBM39          | RNA binding motif protein 39                                   | ENST00000465158 | 0,500547409  |
| A_33_P3401284 | NR_003051                       | RMRP           | RNA component of mitochondrial RNA processing endoribonuclease |                 | 0,500301467  |
| A_21_P0010752 | ENST00000435300                 | XLOC_I2_000727 |                                                                | ENST00000435300 | 0,500208547  |
| A_23_P112554  | NM_001855                       | COL15A1        | collagen, type XV, alpha 1                                     | ENST00000375001 | -0,500037052 |
| A_23_P369815  | NM_000639                       | FASLG          | Fas ligand (TNF superfamily, member 6)                         | ENST00000367721 | -0,500091125 |
| A_23_P134454  | NM_001753                       | CAV1           | caveolin 1, caveolae protein, 22kDa                            | ENST00000341049 | -0,500094035 |
| A_24_P82106   | NM_004995                       | MMP14          | matrix metalloproteinase 14 (membrane-inserted)                | ENST00000311852 | -0,500140141 |
| A_24_P392958  | NM_144628                       | TBC1D20        | TBC1 domain family, member 20                                  | ENST00000461188 | -0,500169176 |
| A_33_P3340342 | NM_144601                       | CMTM3          | CKLF-like MARVEL transmembrane domain containing 3             | ENST00000361909 | -0,500515239 |
| A_23_P347632  | NM_014751                       | MTSS1          | metastasis suppressor 1                                        | ENST00000520771 | -0,500542026 |
| A_33_P3395605 | NM_181724                       | TMEM119        | transmembrane protein 119                                      | ENST00000392806 | -0,500543246 |
| A_23_P159937  | NM_005629                       | SLC6A8         | solute carrier family 6 (neurotransmitter transporter, creati  | ENST00000253122 | -0,500599325 |
| A_24_P753161  | NM_001204                       | BMPR2          | bone morphogenetic protein receptor, type II (serine/threo     | ENST00000374580 | -0,500791977 |
| A_33_P3655775 | AK096384                        | LOC284630      | uncharacterized LOC284630                                      |                 | -0,500867292 |
| A_24_P119577  | NM_001048183                    | PHACTR4        | phosphatase and actin regulator 4                              | ENST00000373836 | -0,500898343 |
| A_23_P125772  | NM_014370                       | SRPK3          | SRSF protein kinase 3                                          | ENST00000370101 | -0,501032531 |
| A_33_P3209491 | NM_022648                       | TNS1           | tensin 1                                                       | ENST00000171887 | -0,501076059 |
| A_21_P0014254 | XR_109026                       | LOC645954      | supervillin pseudogene                                         |                 | -0,501326847 |
| A_33_P3220545 | NM_001003841                    | SLC6A19        | solute carrier family 6 (neutral amino acid transporter), mer  | ENST00000515652 | -0,50142776  |

|               |                 |              |                                                                 |                 |              |
|---------------|-----------------|--------------|-----------------------------------------------------------------|-----------------|--------------|
| A_23_P110569  | NM_018700       | TRIM36       | tripartite motif containing 36                                  | ENST00000282369 | -0,501557976 |
| A_32_P132317  | NM_001033045    | GPR155       | G protein-coupled receptor 155                                  | ENST00000392552 | -0,501617258 |
| A_21_P0007265 | TCONS_00019442  | XLOC_009252  |                                                                 |                 | -0,501699048 |
| A_23_P257936  | NM_001586       | TEX28        | testis expressed 28                                             | ENST00000361930 | -0,501725767 |
| A_23_P114713  | NM_000779       | CYP4B1       | cytochrome P450, family 4, subfamily B, polypeptide 1           | ENST00000371923 | -0,501726779 |
| A_24_P12626   | NM_001753       | CAV1         | caveolin 1, caveolae protein, 22kDa                             | ENST00000451122 | -0,50183862  |
| A_33_P3418120 | NM_022755       | IPPK         | inositol 1,3,4,5,6-pentakisphosphate 2-kinase                   | ENST00000287996 | -0,50186303  |
| A_23_P89902   | NM_005619       | RTN2         | reticulon 2                                                     | ENST00000245923 | -0,501915961 |
| A_23_P12082   | NM_001025199    | CHI3L2       | chitinase 3-like 2                                              | ENST00000369748 | -0,502068929 |
| A_24_P413126  | NM_020182       | PMEPA1       | prostate transmembrane protein, androgen induced 1              | ENST00000265626 | -0,502160384 |
| A_24_P387609  | NM_030940       | ISCA1        | iron-sulfur cluster assembly 1 homolog ( <i>S. cerevisiae</i> ) | ENST00000375991 | -0,50220523  |
| A_33_P3399090 | NM_001037954    | DIXDC1       | DIX domain containing 1                                         | ENST00000440460 | -0,502452878 |
| A_21_P0009723 | TCONS_00027056  | XLOC_013099  |                                                                 |                 | -0,502526828 |
| A_33_P3594654 | NM_024121       | TMEM185B     | transmembrane protein 185B                                      |                 | -0,50253631  |
| A_23_P342000  | NM_144770       | RBM11        | RNA binding motif protein 11                                    | ENST00000468643 | -0,502572053 |
| A_21_P0000121 | NM_001195076    | C19orf81     | chromosome 19 open reading frame 81                             | ENST00000490451 | -0,502589357 |
| A_23_P110569  | NM_018700       | TRIM36       | tripartite motif containing 36                                  | ENST00000282369 | -0,502688139 |
| A_23_P139722  | NM_001065       | TNFRSF1A     | tumor necrosis factor receptor superfamily, member 1A           | ENST00000504738 | -0,502946262 |
| A_33_P3486059 | AV653872        | C1orf195     | chromosome 1 open reading frame 195                             |                 | -0,503094705 |
| A_24_P354724  | NM_054114       | TAGAP        | T-cell activation RhoGTPase activating protein                  | ENST00000326965 | -0,503159873 |
| A_23_P201079  | NM_012231       | PRDM2        | PR domain containing 2, with ZNF domain                         | ENST00000235372 | -0,503264053 |
| A_24_P120537  | NM_152550       | SH3RF2       | SH3 domain containing ring finger 2                             | ENST00000511705 | -0,503310286 |
| A_23_P109345  | NM_004339       | PTTG1IP      | pituitary tumor-transforming 1 interacting protein              | ENST00000330938 | -0,503441445 |
| A_21_P0014732 | ENST00000422968 | LOC100508939 |                                                                 | ENST00000422968 | -0,503517625 |
| A_23_P11800   | NM_018584       | CAMK2N1      | calcium/calmodulin-dependent protein kinase II inhibitor 1      | ENST00000375078 | -0,503580387 |
| A_33_P3361152 | NR_024452       | LOC100134259 | uncharacterized LOC100134259                                    | ENST00000468141 | -0,5037123   |
| A_23_P413862  | NM_020869       | DCDC5        | doublecortin domain containing 5                                | ENST00000303697 | -0,503753605 |
| A_23_P416774  | NM_016929       | CLIC5        | chloride intracellular channel 5                                | ENST00000185206 | -0,503754638 |
| A_23_P60387   | NM_017617       | NOTCH1       | notch 1                                                         | ENST00000277541 | -0,504067403 |



|               |                   |                |                                                                |                 |              |
|---------------|-------------------|----------------|----------------------------------------------------------------|-----------------|--------------|
| A_24_P475814  | NM_025136         | OPA3           | optic atrophy 3 (autosomal recessive, with chorea and spas     | ENST00000263275 | -0,504110883 |
| A_24_P258846  | NM_172390         | NFATC1         | nuclear factor of activated T-cells, cytoplasmic, calcineurin- | ENST00000542384 | -0,504172024 |
| A_23_P109345  | NM_004339         | PTTG1IP        | pituitary tumor-transforming 1 interacting protein             | ENST00000330938 | -0,504177481 |
| A_23_P206324  | NM_031463         | HSDL1          | hydroxysteroid dehydrogenase like 1                            | ENST00000219439 | -0,504212573 |
| A_24_P583040  | ENST00000397861   | C17orf67       | chromosome 17 open reading frame 67                            | ENST00000397861 | -0,50424636  |
| A_24_P143171  | NM_031442         | TMEM47         | transmembrane protein 47                                       | ENST00000275954 | -0,504294125 |
| A_23_P90804   | NM_145686         | MAP4K4         | mitogen-activated protein kinase kinase kinase kinase 4        | ENST00000414004 | -0,504360906 |
| A_24_P271014  | NM_001042388      | PPP4R1         | protein phosphatase 4, regulatory subunit 1                    | ENST00000400556 | -0,504535896 |
| A_33_P3279539 | NR_001526         | TTY17A         | testis-specific transcript, Y-linked 17A (non-protein coding)  | ENST00000416110 | -0,504598682 |
| A_33_P3413840 | NM_001205019      | GK             | glycerol kinase                                                | ENST00000378945 | -0,504639956 |
| A_24_P59111   | BC035912          | DPP6           | dipeptidyl-peptidase 6                                         | ENST00000406326 | -0,504660215 |
| A_24_P945283  | NM_021120         | DLG3           | discs, large homolog 3 (Drosophila)                            | ENST00000542398 | -0,504769107 |
| A_33_P3244026 | NM_020746         | MAVS           | mitochondrial antiviral signaling protein                      |                 | -0,504846317 |
| A_33_P3241831 | NM_005462         | MAGEC1         | melanoma antigen family C, 1                                   | ENST00000370511 | -0,504915231 |
| A_23_P113793  | NM_024508         | ZBED2          | zinc finger, BED-type containing 2                             | ENST00000317012 | -0,505052326 |
| A_24_P245246  | NM_003559         | PIP4K2B        | phosphatidylinositol-5-phosphate 4-kinase, type II, beta       | ENST00000269554 | -0,505241671 |
| A_24_P397255  | NM_153343         | ENPP6          | ectonucleotide pyrophosphatase/phosphodiesterase 6             | ENST00000296741 | -0,505464007 |
| A_23_P102017  | NM_020711         | ERMN           | ermin, ERM-like protein                                        | ENST00000397283 | -0,505474832 |
| A_33_P3345816 | NM_001039966      | GPGR           | G protein-coupled estrogen receptor 1                          | ENST00000342452 | -0,505487261 |
| A_21_P0005697 | TCONS_00014701    | XLOC_006799    |                                                                |                 | -0,505496321 |
| A_24_P53215   | NM_199242         | UNC13D         | unc-13 homolog D (C. elegans)                                  | ENST00000412096 | -0,505621733 |
| A_21_P0013663 | TCONS_I2_0002940: | XLOC_I2_015239 |                                                                |                 | -0,50564995  |
| A_24_P392480  | NM_001012643      | MYPOP          | Myb-related transcription factor, partner of profilin          | ENST00000322217 | -0,505665272 |
| A_23_P360542  | NR_023925         | LINC00470      | long intergenic non-protein coding RNA 470                     | ENST00000412816 | -0,505808986 |
| A_24_P274270  | NM_139266         | STAT1          | signal transducer and activator of transcription 1, 91kDa      | ENST00000540176 | -0,505900498 |
| A_23_P70060   | NM_176895         | PPAP2A         | phosphatidic acid phosphatase type 2A                          | ENST00000307259 | -0,505940323 |
| A_32_P358115  | NR_036490         | LOC284648      | uncharacterized LOC284648                                      |                 | -0,506184551 |
| A_23_P106602  | NM_031476         | CRISPLD2       | cysteine-rich secretory protein LCCL domain containing 2       | ENST00000262424 | -0,506307252 |
| A_23_P155057  | NM_013385         | CYTH4          | cytohesin 4                                                    | ENST00000462927 | -0,506375848 |

|               |                 |                |                                                                |                 |              |
|---------------|-----------------|----------------|----------------------------------------------------------------|-----------------|--------------|
| A_23_P50775   | NM_024509       | LRFN3          | leucine rich repeat and fibronectin type III domain containir  | ENST00000246529 | -0,506405902 |
| A_33_P3364801 | XM_379325       | LOC401180      | uncharacterized LOC401180                                      |                 | -0,506439853 |
| A_33_P3381771 | NM_024052       | C17orf39       | chromosome 17 open reading frame 39                            | ENST00000268719 | -0,506471117 |
| A_24_P284324  | NM_017728       | TMEM104        | transmembrane protein 104                                      | ENST00000417024 | -0,50650619  |
| A_24_P402415  | NM_153262       | SYT14          | synaptotagmin XIV                                              | ENST00000367019 | -0,506570617 |
| A_23_P75800   | NM_013401       | RAB3IL1        | RAB3A interacting protein (rabin3)-like 1                      | ENST00000394836 | -0,50662985  |
| A_23_P144096  | NM_145071       | CISH           | cytokine inducible SH2-containing protein                      | ENST00000348721 | -0,506674115 |
| A_32_P174365  | NM_015265       | SATB2          | SATB homeobox 2                                                | ENST00000260926 | -0,507006952 |
| A_33_P3376321 | NM_020477       | ANK1           | ankyrin 1, erythrocytic                                        | ENST00000358820 | -0,507231807 |
| A_21_P0002289 | TCONS_00003850  | XLOC_001656    |                                                                |                 | -0,507394579 |
| A_23_P151294  | NM_000619       | IFNG           | interferon, gamma                                              | ENST00000229135 | -0,507425539 |
| A_23_P207742  | NM_003250       | THRA           | thyroid hormone receptor, alpha                                | ENST00000394121 | -0,507442706 |
| A_21_P0013409 | ENST00000492054 | XLOC_l2_013648 |                                                                | ENST00000492054 | -0,507522111 |
| A_23_P205489  | NM_182728       | SLC7A8         | solute carrier family 7 (amino acid transporter light chain, L | ENST00000334354 | -0,507931206 |
| A_23_P118536  | NM_018042       | SLFN12         | schlafen family member 12                                      | ENST00000479326 | -0,508333315 |
| A_23_P10025   | NM_006159       | NELL2          | NEL-like 2 (chicken)                                           | ENST00000437801 | -0,508427305 |
| A_33_P3406196 | NM_002262       | KLRD1          | killer cell lectin-like receptor subfamily D, member 1         | ENST00000344825 | -0,508601648 |
| A_23_P108751  | NM_001039492    | FHL2           | four and a half LIM domains 2                                  | ENST00000358129 | -0,508682526 |
| A_23_P425587  | NM_001001683    | MED11          | mediator complex subunit 11                                    | ENST00000293777 | -0,508702316 |
| A_23_P15375   | NM_024585       | ARMC7          | armadillo repeat containing 7                                  | ENST00000245543 | -0,50880645  |
| A_24_P120115  | NM_003879       | CFLAR          | CASP8 and FADD-like apoptosis regulator                        | ENST00000340870 | -0,508833565 |
| A_24_P334718  | NM_181791       | GPR141         | G protein-coupled receptor 141                                 | ENST00000334425 | -0,508845155 |
| A_23_P11800   | NM_018584       | CAMK2N1        | calcium/calmodulin-dependent protein kinase II inhibitor 1     | ENST00000375078 | -0,508883787 |
| A_33_P3312182 | NM_153256       | C10orf47       | chromosome 10 open reading frame 47                            | ENST00000379208 | -0,508901687 |
| A_21_P0007734 | TCONS_00020861  | XLOC_010144    |                                                                |                 | -0,508989233 |
| A_23_P151150  | NM_202002       | FOXM1          | forkhead box M1                                                | ENST00000359843 | -0,509054628 |
| A_21_P0007351 | ENST00000530941 | XLOC_009436    |                                                                | ENST00000530941 | -0,50912663  |
| A_33_P3382380 | NM_020131       | UBQLN4         | ubiquilin 4                                                    | ENST00000368307 | -0,509146831 |
| A_24_P85243   | ENST00000360669 | FAM153A        | family with sequence similarity 153, member A                  | ENST00000360669 | -0,509252611 |

|                |                 |              |                                                               |                 |              |
|----------------|-----------------|--------------|---------------------------------------------------------------|-----------------|--------------|
| A_21_P0008486  | ENST00000502187 | XLOC_011117  |                                                               | ENST00000502187 | -0,509269763 |
| A_24_P304154   | NM_001025390    | AMPD3        | adenosine monophosphate deaminase 3                           | ENST00000396553 | -0,509271306 |
| A_21_P0006675  | ENST00000442526 | XLOC_008467  |                                                               | ENST00000442526 | -0,509353182 |
| A_33_P3214105  | NM_001674       | ATF3         | activating transcription factor 3                             | ENST00000366981 | -0,509575158 |
| A_24_P210637   | NM_130468       | CHST14       | carbohydrate (N-acetylgalactosamine 4-0) sulfotransferase     | ENST00000306243 | -0,509652439 |
| A_21_P0008525  | TCONS_00023051  | XLOC_010932  |                                                               |                 | -0,509695579 |
| A_23_P102508   | NM_021095       | SLC5A6       | solute carrier family 5 (sodium-dependent vitamin transpor    | ENST00000488743 | -0,509773312 |
| A_21_P0006669  | ENST00000434552 | XLOC_008447  |                                                               | ENST00000434552 | -0,509807921 |
| A_24_P330773   | NM_005831       | CALCOCO2     | calcium binding and coiled-coil domain 2                      | ENST00000258947 | -0,509869573 |
| A_23_P170857   | NM_002182       | IL1RAP       | interleukin 1 receptor accessory protein                      | ENST00000447382 | -0,509894727 |
| A_21_P0014246  | ENST00000443016 | LOC100507213 |                                                               | ENST00000443016 | -0,509970629 |
| A_23_P12082    | NM_001025199    | CHI3L2       | chitinase 3-like 2                                            | ENST00000369748 | -0,509986171 |
| A_23_P70213    | NM_000038       | APC          | adenomatous polyposis coli                                    | ENST00000508376 | -0,509987695 |
| A_21_P0008593  | TCONS_00023310  | XLOC_011179  |                                                               |                 | -0,510001923 |
| A_33_P3275233  | AK093561        | LOC100131792 | uncharacterized LOC100131792                                  |                 | -0,510015329 |
| A_23_P149496   | NM_018053       | XKR8         | XK, Kell blood group complex subunit-related family, memb     | ENST00000373884 | -0,51001995  |
| A_24_P79241    | NM_014948       | UBOX5        | U-box domain containing 5                                     | ENST00000217173 | -0,510364234 |
| A_24_P288298   | NM_002255       | KIR2DL4      | killer cell immunoglobulin-like receptor, two domains, long   | ENST00000396293 | -0,510541596 |
| A_23_P109345   | NM_004339       | PTTG1IP      | pituitary tumor-transforming 1 interacting protein            | ENST00000330938 | -0,510659508 |
| A_23_P112554   | NM_001855       | COL15A1      | collagen, type XV, alpha 1                                    | ENST00000375001 | -0,510661789 |
| A_33_P3367596  | NM_001830       | CLCN4        | chloride channel 4                                            | ENST00000380829 | -0,510799883 |
| A_23_P169887   | NM_001521       | GTF3C2       | general transcription factor IIIC, polypeptide 2, beta 110kDa | ENST00000264720 | -0,510812769 |
| A_24_P274270   | NM_139266       | STAT1        | signal transducer and activator of transcription 1, 91kDa     | ENST00000540176 | -0,510949278 |
| A_24_P129277   | NM_006092       | NOD1         | nucleotide-binding oligomerization domain containing 1        | ENST00000467706 | -0,511000583 |
| A_33_P3405068  | NM_020443       | NAV1         | neuron navigator 1                                            | ENST00000367301 | -0,51102945  |
| A_21_P0000071  | NM_153033       | KCTD7        | potassium channel tetramerisation domain containing 7         |                 | -0,511037567 |
| A_24_P125561   | NM_014441       | SIGLEC9      | sialic acid binding Ig-like lectin 9                          | ENST00000440804 | -0,511096028 |
| A_23_P117298   | NM_000131       | F7           | coagulation factor VII (serum prothrombin conversion accel    | ENST00000346342 | -0,511129667 |
| A_19_P00811940 | BQ007591        | XLOC_002759  |                                                               |                 | -0,511228953 |

|                |                 |                |                                                              |                 |              |
|----------------|-----------------|----------------|--------------------------------------------------------------|-----------------|--------------|
| A_24_P322353   | NM_024430       | PSTPIP2        | proline-serine-threonine phosphatase interacting protein 2   | ENST00000495213 | -0,511488062 |
| A_33_P3378835  | NM_004252       | SLC9A3R1       | solute carrier family 9 (sodium/hydrogen exchanger), mem1    | ENST00000413388 | -0,511549398 |
| A_23_P12082    | NM_001025199    | CHI3L2         | chitinase 3-like 2                                           | ENST00000369748 | -0,511660443 |
| A_24_P376441   | NM_001025247    | TAF5L          | TAF5-like RNA polymerase II, p300/CBP-associated factor (P   | ENST00000366675 | -0,511672684 |
| A_33_P3211956  | NM_005873       | RGS19          | regulator of G-protein signaling 19                          | ENST00000395042 | -0,511732168 |
| A_23_P111311   | NM_144497       | AKAP12         | A kinase (PRKA) anchor protein 12                            | ENST00000253332 | -0,511905003 |
| A_33_P3248953  | NM_001164478    | C5orf63        | chromosome 5 open reading frame 63                           | ENST00000296662 | -0,512098681 |
| A_23_P210886   | NM_138578       | BCL2L1         | BCL2-like 1                                                  | ENST00000420653 | -0,512151349 |
| A_23_P109345   | NM_004339       | PTTG1IP        | pituitary tumor-transforming 1 interacting protein           | ENST00000330938 | -0,512360408 |
| A_24_P274270   | NM_139266       | STAT1          | signal transducer and activator of transcription 1, 91kDa    | ENST00000540176 | -0,512411707 |
| A_21_P0012386  | BC042024        | XLOC_l2_009811 |                                                              |                 | -0,512427727 |
| A_33_P3250851  | NM_001037335    | PRIC285        | peroxisomal proliferator-activated receptor A interacting cc | ENST00000370082 | -0,51248643  |
| A_24_P274270   | NM_139266       | STAT1          | signal transducer and activator of transcription 1, 91kDa    | ENST00000540176 | -0,512499694 |
| A_21_P0012860  | NR_037889       | LOC285626      | uncharacterized LOC285626                                    |                 | -0,512511057 |
| A_21_P0002254  | TCONS_00003758  | XLOC_001558    |                                                              |                 | -0,512609975 |
| A_24_P940434   | AK094364        | LOC439914      | uncharacterized LOC439914                                    | ENST00000316124 | -0,512731096 |
| A_33_P3571901  | AL050153        | DKFZP586K1520  | DKFZP586K1520 protein                                        |                 | -0,512770766 |
| A_24_P413988   | NM_006464       | TGOLN2         | trans-golgi network protein 2                                | ENST00000377386 | -0,51279817  |
| A_23_P413303   | NR_033797       | DKFZP434I0714  | uncharacterized protein DKFZP434I0714                        |                 | -0,51284123  |
| A_19_P00320469 | NR_015375       | FLJ35024       | uncharacterized LOC401491                                    |                 | -0,512864733 |
| A_33_P3292196  | NM_032882       | PNMA6A         | paraneoplastic antigen like 6A                               | ENST00000535416 | -0,512917274 |
| A_21_P0007731  | TCONS_00020858  | XLOC_010141    |                                                              |                 | -0,512965409 |
| A_33_P3371954  | NM_052868       | IGSF8          | immunoglobulin superfamily, member 8                         | ENST00000314485 | -0,513004425 |
| A_19_P00319963 | ENST00000455005 | XLOC_005297    |                                                              | ENST00000455005 | -0,513027423 |
| A_23_P134454   | NM_001753       | CAV1           | caveolin 1, caveolae protein, 22kDa                          | ENST00000341049 | -0,513192617 |
| A_23_P215634   | NM_001013398    | IGFBP3         | insulin-like growth factor binding protein 3                 | ENST00000438491 | -0,513506365 |
| A_23_P167599   | NM_001034850    | FAM134B        | family with sequence similarity 134, member B                | ENST00000306320 | -0,513765756 |
| A_33_P3335725  | NM_000208       | INSR           | insulin receptor                                             | ENST00000302850 | -0,513784687 |
| A_23_P43107    | NM_030788       | TM7SF4         | transmembrane 7 superfamily member 4                         | ENST00000297581 | -0,513861804 |

|                |                 |                |                                                              |                 |              |
|----------------|-----------------|----------------|--------------------------------------------------------------|-----------------|--------------|
| A_23_P382045   | NM_020245       | TULP4          | tubby like protein 4                                         | ENST00000367097 | -0,51390121  |
| A_33_P3355230  | NM_002287       | LAIR1          | leukocyte-associated immunoglobulin-like receptor 1          | ENST00000313038 | -0,513964239 |
| A_33_P3277361  | NM_001199770    | OTX1           | orthodenticle homeobox 1                                     | ENST00000405984 | -0,513992507 |
| A_23_P115683   | NM_024747       | HPS6           | Hermansky-Pudlak syndrome 6                                  | ENST00000299238 | -0,514047673 |
| A_32_P135348   | NM_033394       | TANC1          | tetratricopeptide repeat, ankyrin repeat and coiled-coil con | ENST00000454300 | -0,514095078 |
| A_23_P151294   | NM_000619       | IFNG           | interferon, gamma                                            | ENST00000229135 | -0,514147067 |
| A_23_P147025   | NM_004794       | RAB33A         | RAB33A, member RAS oncogene family                           | ENST00000257017 | -0,51444883  |
| A_24_P942321   | NM_018027       | FRMD4A         | FERM domain containing 4A                                    | ENST00000357447 | -0,514504783 |
| A_24_P274270   | NM_139266       | STAT1          | signal transducer and activator of transcription 1, 91kDa    | ENST00000540176 | -0,514669188 |
| A_33_P3532659  | NR_033901       | LOC285441      | uncharacterized LOC285441                                    |                 | -0,514750046 |
| A_24_P294842   | NM_000332       | ATXN1          | ataxin 1                                                     | ENST00000450222 | -0,514849835 |
| A_21_P0001611  | TCONS_00001776  | XLOC_001162    |                                                              |                 | -0,515002166 |
| A_23_P155052   | NM_030641       | APOL6          | apolipoprotein L, 6                                          | ENST00000409652 | -0,515024051 |
| A_32_P32254    | NM_001848       | COL6A1         | collagen, type VI, alpha 1                                   | ENST00000538397 | -0,515027108 |
| A_33_P3319953  | ENST00000373341 | ATRX           | alpha thalassemia/mental retardation syndrome X-linked       | ENST00000373341 | -0,515028992 |
| A_32_P152204   | NM_001085479    | IQCF3          | IQ motif containing F3                                       | ENST00000456080 | -0,515038227 |
| A_33_P3404814  | NM_020988       | GNAO1          | guanine nucleotide binding protein (G protein), alpha activa | ENST00000262493 | -0,515064185 |
| A_33_P3408702  | ENST00000504117 | KIAA0825       | KIAA0825                                                     | ENST00000504117 | -0,515084236 |
| A_21_P0004315  | TCONS_00010141  | XLOC_004606    |                                                              |                 | -0,515121032 |
| A_23_P7582     | NM_003202       | TCF7           | transcription factor 7 (T-cell specific, HMG-box)            | ENST00000522653 | -0,51534846  |
| A_23_P420196   | NM_003745       | SOCS1          | suppressor of cytokine signaling 1                           | ENST00000332029 | -0,515471656 |
| A_23_P119102   | NM_003370       | VASP           | vasodilator-stimulated phosphoprotein                        | ENST00000245932 | -0,515483622 |
| A_21_P0007426  | THC2659036      | XLOC_009037    |                                                              |                 | -0,515529731 |
| A_19_P00319630 | XR_110300       | LOC100506965   | uncharacterized LOC100506965                                 |                 | -0,515628754 |
| A_33_P3725227  | NM_015198       | COBL           | cordons-bleu homolog (mouse)                                 | ENST00000462395 | -0,515757192 |
| A_23_P113777   | NM_004791       | ITGBL1         | integrin, beta-like 1 (with EGF-like repeat domains)         | ENST00000376162 | -0,515770031 |
| A_21_P0012827  | ENST00000503577 | XLOC_I2_011531 |                                                              | ENST00000503577 | -0,515894491 |
| A_23_P30363    | NM_004199       | P4HA2          | prolyl 4-hydroxylase, alpha polypeptide II                   | ENST00000379104 | -0,515904085 |
| A_23_P1029     | NM_017459       | MFAP2          | microfibrillar-associated protein 2                          | ENST00000438542 | -0,51601933  |



|               |                 |                |                                                                  |                 |              |
|---------------|-----------------|----------------|------------------------------------------------------------------|-----------------|--------------|
| A_33_P3401701 | NM_001957       | EDNRA          | endothelin receptor type A                                       | ENST00000394047 | -0,516031093 |
| A_23_P100292  | AK024487        | ZNF598         | zinc finger protein 598                                          |                 | -0,516038814 |
| A_23_P114353  | NM_032946       | NXF5           | nuclear RNA export factor 5                                      | ENST00000263032 | -0,516065174 |
| A_21_P0009753 | THC2527567      | XLOC_013282    |                                                                  |                 | -0,516085523 |
| A_33_P3350728 | NM_014808       | FARP2          | FERM, RhoGEF and pleckstrin domain protein 2                     | ENST00000373287 | -0,516128024 |
| A_21_P0005852 | ENST00000421742 | PPP1R42        | protein phosphatase 1, regulatory subunit 42                     | ENST00000421742 | -0,516156965 |
| A_23_P122863  | NM_001001555    | GRB10          | growth factor receptor-bound protein 10                          | ENST00000402497 | -0,516204642 |
| A_33_P3210343 | NM_001987       | ETV6           | ets variant 6                                                    |                 | -0,516239027 |
| A_24_P362317  | NM_001111       | ADAR           | adenosine deaminase, RNA-specific                                | ENST00000368474 | -0,516293189 |
| A_21_P0000185 | NM_001242804    | LOC100505549   | uncharacterized LOC100505549                                     |                 | -0,51640805  |
| A_24_P274270  | NM_139266       | STAT1          | signal transducer and activator of transcription 1, 91kDa        | ENST00000540176 | -0,516530148 |
| A_33_P3269159 | ENST00000376196 | NALCN          | sodium leak channel, non-selective                               | ENST00000376196 | -0,516535385 |
| A_24_P117177  | NM_152897       | SNX21          | sorting nexin family member 21                                   | ENST00000486336 | -0,51665039  |
| A_33_P3365437 | NM_020204       | LHX9           | LIM homeobox 9                                                   | ENST00000367391 | -0,51680581  |
| A_23_P332326  | NM_153213       | ARHGEF19       | Rho guanine nucleotide exchange factor (GEF) 19                  | ENST00000270747 | -0,516810857 |
| A_23_P68155   | NM_022168       | IFIH1          | interferon induced with helicase C domain 1                      | ENST00000543192 | -0,516829568 |
| A_33_P3343845 | NM_175709       | CBX7           | chromobox homolog 7                                              | ENST00000490741 | -0,516847916 |
| A_33_P3297050 | NM_033087       | ALG2           | asparagine-linked glycosylation 2, alpha-1,3-mannosyltransferase | ENST00000238477 | -0,516874666 |
| A_23_P120863  | NM_004861       | GAL3ST1        | galactose-3-O-sulfotransferase 1                                 | ENST00000406361 | -0,516931514 |
| A_21_P0009370 | TCONS_00025784  | XLOC_012592    |                                                                  |                 | -0,517200372 |
| A_24_P49106   | NM_152278       | TCEAL7         | transcription elongation factor A (SII)-like 7                   | ENST00000372666 | -0,51726884  |
| A_33_P3384108 | NM_194255       | SLC19A1        | solute carrier family 19 (folate transporter), member 1          | ENST00000311124 | -0,51751185  |
| A_23_P251836  | NM_006174       | NPY5R          | neuropeptide Y receptor Y5                                       | ENST00000506953 | -0,517523503 |
| A_24_P371281  | NM_025246       | TMEM22         | transmembrane protein 22                                         | ENST00000393079 | -0,517604335 |
| A_21_P0012789 | ENST00000509983 | XLOC_l2_011227 |                                                                  | ENST00000509983 | -0,517692225 |
| A_33_P3237005 | NR_002438       | ZFAT-AS1       | ZFAT antisense RNA 1 (non-protein coding)                        | ENST00000505776 | -0,51784704  |
| A_21_P0000156 | NM_001204760    | TLL1           | tolloid-like 1                                                   | ENST00000513213 | -0,517915366 |
| A_33_P3368830 | NM_001033667    | LY9            | lymphocyte antigen 9                                             | ENST00000368039 | -0,518015234 |
| A_23_P104438  | NM_032578       | MYPN           | myopalladin                                                      | ENST00000354393 | -0,518049616 |



|                |                 |                |                                                           |                 |  |              |
|----------------|-----------------|----------------|-----------------------------------------------------------|-----------------|--|--------------|
| A_21_P0009255  | TCONS_00025429  | XLOC_012244    |                                                           |                 |  | -0,518066865 |
| A_33_P3332414  | NM_000927       | ABCB1          | ATP-binding cassette, sub-family B (MDR/TAP), member 1    | ENST00000394661 |  | -0,518090993 |
| A_33_P3259042  | NM_001146313    | MYOCD          | myocardin                                                 | ENST00000395988 |  | -0,518184148 |
| A_33_P3412900  | NM_001039771    | CBLN3          | cerebellin 3 precursor                                    | ENST00000267406 |  | -0,518272198 |
| A_21_P0012036  | ENST00000419243 | XLOC_I2_007706 |                                                           | ENST00000419243 |  | -0,518623853 |
| A_23_P107051   | NM_003673       | TCAP           | titin-cap (telethonin)                                    | ENST00000309889 |  | -0,518812516 |
| A_24_P274270   | NM_139266       | STAT1          | signal transducer and activator of transcription 1, 91kDa | ENST00000540176 |  | -0,518822411 |
| A_21_P0002253  | BC036617        | XLOC_001558    |                                                           |                 |  | -0,519039631 |
| A_24_P170439   | NR_027256       | TREML3         | triggering receptor expressed on myeloid cells-like 3     |                 |  | -0,519218405 |
| A_23_P69109    | NM_021105       | PLSCR1         | phospholipid scramblase 1                                 | ENST00000448205 |  | -0,519255414 |
| A_23_P85703    | NM_005686       | SOX13          | SRY (sex determining region Y)-box 13                     | ENST00000367204 |  | -0,519263032 |
| A_23_P143935   | NM_025163       | PIGZ           | phosphatidylinositol glycan anchor biosynthesis, class Z  | ENST00000412723 |  | -0,519410422 |
| A_21_P0003518  | ENST00000514347 | XLOC_004102    |                                                           | ENST00000514347 |  | -0,519557645 |
| A_23_P112531   | NM_001035254    | FAM102A        | family with sequence similarity 102, member A             | ENST00000300434 |  | -0,519615724 |
| A_23_P109345   | NM_004339       | PTTG1IP        | pituitary tumor-transforming 1 interacting protein        | ENST00000330938 |  | -0,519669799 |
| A_23_P41487    | NM_015130       | TBC1D9         | TBC1 domain family, member 9 (with GRAM domain)           | ENST00000442267 |  | -0,519695332 |
| A_19_P00320842 | NM_001113434    | C17orf51       | chromosome 17 open reading frame 51                       | ENST00000391411 |  | -0,519708157 |
| A_33_P3318671  | NM_007260       | LYPLA2         | lysophospholipase II                                      | ENST00000374506 |  | -0,519714485 |
| A_24_P945113   | NM_000020       | ACVRL1         | activin A receptor type II-like 1                         | ENST00000550683 |  | -0,519787016 |
| A_23_P103511   | NM_001085375    | C1orf226       | chromosome 1 open reading frame 226                       | ENST00000458626 |  | -0,520033264 |
| A_23_P748      | NM_006147       | IRF6           | interferon regulatory factor 6                            | ENST00000542854 |  | -0,520065126 |
| A_23_P109345   | NM_004339       | PTTG1IP        | pituitary tumor-transforming 1 interacting protein        | ENST00000330938 |  | -0,520089326 |
| A_21_P0003928  | ENST00000502934 | XLOC_004470    |                                                           | ENST00000502934 |  | -0,520174341 |
| A_33_P3359157  | NM_006589       | FAM189B        | family with sequence similarity 189, member B             | ENST00000323361 |  | -0,520275478 |
| A_33_P3379726  | NM_013301       | CCDC106        | coiled-coil domain containing 106                         | ENST00000308964 |  | -0,520298739 |
| A_21_P0006162  | DB077982        | XLOC_007428    |                                                           |                 |  | -0,520319465 |
| A_23_P113161   | NM_030806       | C1orf21        | chromosome 1 open reading frame 21                        | ENST00000235307 |  | -0,520333911 |
| A_21_P0007150  | ENST00000447864 | XLOC_009338    |                                                           | ENST00000447864 |  | -0,520441543 |
| A_21_P0004220  | TCONS_00009860  | XLOC_004273    |                                                           |                 |  | -0,520531892 |

|                |                 |              |                                                            |                 |  |              |
|----------------|-----------------|--------------|------------------------------------------------------------|-----------------|--|--------------|
| A_21_P0010106  | TCONS_00028608  | XLOC_013643  |                                                            |                 |  | -0,52056048  |
| A_23_P119102   | NM_003370       | VASP         | vasodilator-stimulated phosphoprotein                      | ENST00000245932 |  | -0,520686233 |
| A_23_P163458   | NM_139265       | EHD4         | EH-domain containing 4                                     | ENST00000220325 |  | -0,520743412 |
| A_23_P100292   | AK024487        | ZNF598       | zinc finger protein 598                                    |                 |  | -0,520748851 |
| A_33_P3225562  | NR_040249       | CYP2G1P      | cytochrome P450, family 2, subfamily G, polypeptide 1 pseu | ENST00000252909 |  | -0,520969466 |
| A_23_P38784    | NM_014385       | SIGLEC7      | sialic acid binding Ig-like lectin 7                       | ENST00000317643 |  | -0,521112085 |
| A_23_P153853   | NM_001398       | ECH1         | enoyl CoA hydratase 1, peroxisomal                         | ENST00000221418 |  | -0,521171721 |
| A_21_P0000052  | NM_001164554    | DISC1        | disrupted in schizophrenia 1                               | ENST00000468399 |  | -0,521199752 |
| A_23_P79231    | NM_134442       | CREB1        | cAMP responsive element binding protein 1                  | ENST00000432329 |  | -0,521244492 |
| A_24_P140608   | NM_001945       | HBEGF        | heparin-binding EGF-like growth factor                     | ENST00000507104 |  | -0,521334649 |
| A_33_P3729375  | AK093857        | LOC285181    | uncharacterized LOC285181                                  |                 |  | -0,521338002 |
| A_24_P214598   | NM_152542       | PPM1K        | protein phosphatase, Mg2+/Mn2+ dependent, 1K               | ENST00000506423 |  | -0,521455146 |
| A_21_P0003964  | ENST00000500616 | XLOC_004280  |                                                            | ENST00000500616 |  | -0,521503293 |
| A_21_P0013980  | XM_003119104    | LOC100287188 | family with sequence similarity 104, member B pseudogene   |                 |  | -0,521530397 |
| A_24_P274270   | NM_139266       | STAT1        | signal transducer and activator of transcription 1, 91kDa  | ENST00000540176 |  | -0,521537899 |
| A_19_P00805702 | NM_020156       | C1GALT1      | core 1 synthase, glycoprotein-N-acetylgalactosamine 3-beta | ENST00000436587 |  | -0,521606418 |
| A_24_P227091   | NM_004523       | KIF11        | kinesin family member 11                                   | ENST00000260731 |  | -0,521617839 |
| A_23_P37910    | NM_002746       | MAPK3        | mitogen-activated protein kinase 3                         | ENST00000395202 |  | -0,521624218 |
| A_32_P184488   | NM_198850       | PHLDB3       | pleckstrin homology-like domain, family B, member 3        | ENST00000292140 |  | -0,521701304 |
| A_33_P3233070  | XM_003118688    | LOC100505564 | uncharacterized LOC100505564                               |                 |  | -0,521855741 |
| A_33_P3329344  | NM_004104       | FASN         | fatty acid synthase                                        | ENST00000306749 |  | -0,521896641 |
| A_21_P0003419  | BC040914        | XLOC_003738  |                                                            |                 |  | -0,521933303 |
| A_21_P0003861  | NR_038838       | LOC100506122 | uncharacterized LOC100506122                               | ENST00000503929 |  | -0,522059702 |
| A_24_P399630   | NM_002730       | PRKACA       | protein kinase, cAMP-dependent, catalytic, alpha           | ENST00000308677 |  | -0,522109043 |
| A_33_P3228305  | NM_015071       | ARHGAP26     | Rho GTPase activating protein 26                           | ENST00000378004 |  | -0,522168703 |
| A_33_P3422471  | XM_003403636    | LOC100506255 | uncharacterized protein LOC100506255                       |                 |  | -0,522188951 |
| A_23_P338890   | NM_002827       | PTPN1        | protein tyrosine phosphatase, non-receptor type 1          | ENST00000371621 |  | -0,522197177 |
| A_21_P0001222  | ENST00000441790 | XLOC_001208  |                                                            | ENST00000441790 |  | -0,522355555 |
| A_23_P339773   | NM_182752       | TPRG1L       | tumor protein p63 regulated 1-like                         | ENST00000378344 |  | -0,522395071 |

|                |                 |                |                                                            |                 |              |
|----------------|-----------------|----------------|------------------------------------------------------------|-----------------|--------------|
| A_23_P156824   | NM_000863       | HTR1B          | 5-hydroxytryptamine (serotonin) receptor 1B                | ENST00000369947 | -0,522430706 |
| A_21_P0002037  | ENST00000446073 | XLOC_002037    |                                                            | ENST00000446073 | -0,52251542  |
| A_33_P3362831  | NM_003281       | TNNI1          | troponin I type 1 (skeletal, slow)                         | ENST00000358712 | -0,522525923 |
| A_23_P134454   | NM_001753       | CAV1           | caveolin 1, caveolae protein, 22kDa                        | ENST00000341049 | -0,52254025  |
| A_32_P79483    | NR_036487       | LOC283481      | uncharacterized LOC283481                                  |                 | -0,52262288  |
| A_19_P00317878 | XR_132670       | LOC100652730   | uncharacterized LOC100652730                               | ENST00000412500 | -0,52272022  |
| A_23_P26771    | NM_006678       | CD300C         | CD300c molecule                                            | ENST00000330793 | -0,52300375  |
| A_33_P3268783  | NM_133463       | AMZ1           | archaelysin family metallopeptidase 1                      | ENST00000312371 | -0,523009588 |
| A_23_P85716    | NM_021642       | FCGR2A         | Fc fragment of IgG, low affinity IIa, receptor (CD32)      | ENST00000471026 | -0,523124626 |
| A_21_P0009020  | TCONS_00024611  | XLOC_011900    |                                                            |                 | -0,523237344 |
| A_23_P3532     | NM_004862       | LITAF          | lipopolysaccharide-induced TNF factor                      | ENST00000381810 | -0,523389462 |
| A_23_P77545    | NM_001053       | SSTR5          | somatostatin receptor 5                                    | ENST00000539762 | -0,523467426 |
| A_23_P103511   | NM_001085375    | C1orf226       | chromosome 1 open reading frame 226                        | ENST00000458626 | -0,523583844 |
| A_21_P0006902  | AK023036        | LINC00263      | long intergenic non-protein coding RNA 263                 |                 | -0,523815745 |
| A_21_P0004914  | TCONS_00011908  | XLOC_005409    |                                                            |                 | -0,523827119 |
| A_21_P0009978  | TCONS_00028230  | XLOC_013574    |                                                            |                 | -0,524082991 |
| A_21_P0004442  | THC2786259      | XLOC_004989    |                                                            |                 | -0,524116562 |
| A_33_P3344156  | NM_001105572    | PLA2G2C        | phospholipase A2, group IIC                                | ENST00000247992 | -0,524194426 |
| A_23_P305198   | NM_003151       | STAT4          | signal transducer and activator of transcription 4         | ENST00000450994 | -0,524596641 |
| A_21_P0010849  | AK098032        | XLOC_I2_001810 |                                                            |                 | -0,524627619 |
| A_24_P383609   | NM_199461       | NANOS1         | nanos homolog 1 (Drosophila)                               | ENST00000340087 | -0,524663669 |
| A_23_P258093   | NM_006411       | AGPAT1         | 1-acylglycerol-3-phosphate O-acyltransferase 1 (lysophosph | ENST00000395499 | -0,524752433 |
| A_33_P3228450  | NM_001136007    | FXYD3          | FXYD domain containing ion transport regulator 3           | ENST00000435734 | -0,524835741 |
| A_23_P16834    | NM_022823       | FNDC4          | fibronectin type III domain containing 4                   | ENST00000491414 | -0,524837713 |
| A_33_P3331366  | NM_005082       | TRIM25         | tripartite motif containing 25                             | ENST00000316881 | -0,524870467 |
| A_21_P0007052  | NR_026794       | LOC731789      | uncharacterized LOC731789                                  |                 | -0,524887629 |
| A_23_P217379   | NM_033641       | COL4A6         | collagen, type IV, alpha 6                                 | ENST00000394872 | -0,524999118 |
| A_24_P305933   | NM_020698       | TMCC3          | transmembrane and coiled-coil domain family 3              | ENST00000261226 | -0,525072935 |
| A_23_P100292   | AK024487        | ZNF598         | zinc finger protein 598                                    |                 | -0,525098414 |

|                |                  |                |                                                                                    |                 |              |
|----------------|------------------|----------------|------------------------------------------------------------------------------------|-----------------|--------------|
| A_23_P119377   | NM_004228        | CYTH2          | cytohesin 2                                                                        | ENST00000474049 | -0,525105188 |
| A_23_P12082    | NM_001025199     | CHI3L2         | chitinase 3-like 2                                                                 | ENST00000369748 | -0,52524142  |
| A_21_P0014346  | XR_109386        | LOC100505899   | uncharacterized LOC100505899                                                       |                 | -0,525359627 |
| A_32_P148710   | NM_005507        | CFL1           | cofilin 1 (non-muscle)                                                             | ENST00000308162 | -0,525375508 |
| A_23_P100292   | AK024487         | ZNF598         | zinc finger protein 598                                                            |                 | -0,52550176  |
| A_33_P3632866  | NM_153710        | C9orf96        | chromosome 9 open reading frame 96                                                 | ENST00000371957 | -0,525577807 |
| A_23_P100386   | NM_152456        | IL34           | interleukin 34                                                                     | ENST00000429149 | -0,525587069 |
| A_33_P3397443  | NM_182687        | PKMYT1         | protein kinase, membrane associated tyrosine/threonine 1                           | ENST00000402679 | -0,525641436 |
| A_21_P0008987  | TCONS_00024494   | XLOC_011814    |                                                                                    |                 | -0,525700727 |
| A_33_P3367332  | NM_001195736     | C1orf93        | chromosome 1 open reading frame 93                                                 | ENST00000378425 | -0,525816147 |
| A_23_P160720   | NM_018664        | BATF3          | basic leucine zipper transcription factor, ATF-like 3                              | ENST00000478275 | -0,526020477 |
| A_24_P228717   | NM_002872        | RAC2           | ras-related C3 botulinum toxin substrate 2 (rho family, small GTP-binding protein) | ENST00000441619 | -0,526090481 |
| A_23_P100292   | AK024487         | ZNF598         | zinc finger protein 598                                                            |                 | -0,526136213 |
| A_19_P00811440 | TCONS_00004564   | XLOC_002473    |                                                                                    |                 | -0,526184234 |
| A_24_P319923   | NM_053025        | MYLK           | myosin light chain kinase                                                          | ENST00000418370 | -0,526289613 |
| A_23_P122863   | NM_001001555     | GRB10          | growth factor receptor-bound protein 10                                            | ENST00000402497 | -0,52645636  |
| A_23_P502553   | NM_171982        | TRIM35         | tripartite motif containing 35                                                     | ENST00000380544 | -0,526514186 |
| A_23_P103099   | NM_001031695     | RBFOX2         | RNA binding protein, fox-1 homolog (C. elegans) 2                                  | ENST00000438146 | -0,526546738 |
| A_33_P3245908  | NM_001010863     | C10orf128      | chromosome 10 open reading frame 128                                               | ENST00000453436 | -0,526549632 |
| A_33_P3388958  | NM_152760        | SNX32          | sorting nexin 32                                                                   | ENST00000308342 | -0,52661432  |
| A_21_P0012393  | TCONS_I2_0001885 | XLOC_I2_009883 |                                                                                    |                 | -0,526616972 |
| A_21_P0009473  | TCONS_00026325   | XLOC_012662    |                                                                                    |                 | -0,526665119 |
| A_21_P0011348  | NR_040057        | LOC283683      | uncharacterized LOC283683                                                          |                 | -0,526783652 |
| A_23_P18824    | NM_006999        | PAPD7          | PAP associated domain containing 7                                                 | ENST00000230859 | -0,526804671 |
| A_33_P3383326  | NM_057159        | LPAR1          | lysophosphatidic acid receptor 1                                                   | ENST00000374430 | -0,526835659 |
| A_24_P220454   | NM_181552        | CUX1           | cut-like homeobox 1                                                                | ENST00000360264 | -0,526857407 |
| A_24_P18270    | NM_145314        | UCMA           | upper zone of growth plate and cartilage matrix associated                         | ENST00000378681 | -0,526897212 |
| A_21_P0011316  | TCONS_I2_0000858 | XLOC_I2_004631 |                                                                                    |                 | -0,527037026 |
| A_33_P3301782  | NR_024284        | ZEB1-AS1       | ZEB1 antisense RNA 1 (non-protein coding)                                          |                 | -0,527225777 |

|                |                 |                |                                                        |                 |              |
|----------------|-----------------|----------------|--------------------------------------------------------|-----------------|--------------|
| A_33_P3265222  | NM_020775       | KIAA1324       | KIAA1324                                               | ENST00000529753 | -0,527245323 |
| A_24_P170726   | AK094407        | LOC645427      | uncharacterized LOC645427                              |                 | -0,52729096  |
| A_23_P118254   | NM_001451       | FOXF1          | forkhead box F1                                        | ENST00000262426 | -0,527403091 |
| A_21_P0006746  | ENST00000450106 | XLOC_008777    |                                                        | ENST00000450106 | -0,527514466 |
| A_24_P162244   | ENST00000303521 | SCAPER         | S-phase cyclin A-associated protein in the ER          | ENST00000303521 | -0,527667943 |
| A_21_P0006888  | TCONS_00018256  | XLOC_008538    |                                                        |                 | -0,527711341 |
| A_23_P1473     | NM_005041       | PRF1           | perforin 1 (pore forming protein)                      | ENST00000441259 | -0,527816192 |
| A_33_P3252834  | NM_012396       | PHLDA3         | pleckstrin homology-like domain, family A, member 3    | ENST00000367309 | -0,527884521 |
| A_23_P111311   | NM_144497       | AKAP12         | A kinase (PRKA) anchor protein 12                      | ENST00000253332 | -0,527924507 |
| A_33_P3405966  | NM_174964       | ST3GAL3        | ST3 beta-galactoside alpha-2,3-sialyltransferase 3     | ENST00000372362 | -0,527992512 |
| A_21_P0010543  | THC2538788      | XLOC_l2_000343 |                                                        |                 | -0,52807868  |
| A_21_P0011303  | NR_037599       | LOC646278      | programmed cell death 6 interacting protein pseudogene |                 | -0,528220131 |
| A_21_P0006079  | ENST00000432148 | XLOC_007722    |                                                        | ENST00000432148 | -0,528283461 |
| A_32_P151800   | NM_207418       | FAM72D         | family with sequence similarity 72, member D           | ENST00000341209 | -0,528327787 |
| A_33_P3653888  | AF274944        | LOC100128185   | PNAS-19                                                |                 | -0,528646438 |
| A_32_P194246   | NM_015226       | CLEC16A        | C-type lectin domain family 16, member A               | ENST00000381822 | -0,528667371 |
| A_23_P254404   | NM_153271       | SNX33          | sorting nexin 33                                       | ENST00000308527 | -0,528803255 |
| A_33_P3237150  | NM_001200       | BMP2           | bone morphogenetic protein 2                           | ENST00000378827 | -0,528883807 |
| A_23_P119102   | NM_003370       | VASP           | vasodilator-stimulated phosphoprotein                  | ENST00000245932 | -0,528909186 |
| A_23_P119102   | NM_003370       | VASP           | vasodilator-stimulated phosphoprotein                  | ENST00000245932 | -0,529045061 |
| A_21_P0004349  | TCONS_00010231  | XLOC_004699    |                                                        |                 | -0,529067321 |
| A_19_P00321983 | AK309717        | XLOC_012826    |                                                        |                 | -0,529186222 |
| A_33_P3635527  | NM_001085455    | KRTAP24-1      | keratin associated protein 24-1                        | ENST00000340345 | -0,529326386 |
| A_33_P3251876  | NM_003855       | IL18R1         | interleukin 18 receptor 1                              | ENST00000410040 | -0,529447119 |
| A_21_P0008448  | TCONS_00022769  | XLOC_011052    |                                                        |                 | -0,529577732 |
| A_33_P3311041  | AK096227        | CKAP2          | cytoskeleton associated protein 2                      |                 | -0,529637985 |
| A_23_P137984   | NM_002966       | S100A10        | S100 calcium binding protein A10                       | ENST00000368809 | -0,529755888 |
| A_33_P3250953  | NM_032826       | SLC35B4        | solute carrier family 35, member B4                    | ENST00000378509 | -0,529825927 |
| A_32_P124708   | NM_004852       | ONECUT2        | one cut homeobox 2                                     | ENST00000262095 | -0,5298265   |



|               |                  |                |                                                     |                 |  |              |
|---------------|------------------|----------------|-----------------------------------------------------|-----------------|--|--------------|
| A_21_P0012486 | THC2644633       | XLOC_I2_010511 |                                                     |                 |  | -0,529850311 |
| A_23_P48585   | NM_005407        | SALL2          | sal-like 2 (Drosophila)                             | ENST00000327430 |  | -0,529959061 |
| A_23_P122863  | NM_001001555     | GRB10          | growth factor receptor-bound protein 10             | ENST00000402497 |  | -0,529961404 |
| A_24_P128442  | NM_152380        | TBX15          | T-box 15                                            | ENST00000369429 |  | -0,52998605  |
| A_23_P420218  | NM_031895        | CACNG8         | calcium channel, voltage-dependent, gamma subunit 8 | ENST00000270458 |  | -0,529989482 |
| A_21_P0008045 | TCONS_00021747   | XLOC_010339    |                                                     |                 |  | -0,530101155 |
| A_23_P100292  | AK024487         | ZNF598         | zinc finger protein 598                             |                 |  | -0,530141885 |
| A_33_P3402489 | NM_006187        | OAS3           | 2'-5'-oligoadenylate synthetase 3, 100kDa           | ENST00000228928 |  | -0,530240521 |
| A_23_P113471  | NM_174912        | FAAH2          | fatty acid amide hydrolase 2                        | ENST00000491179 |  | -0,530357704 |
| A_33_P3295178 | ENST00000371376  | HSPB11         | heat shock protein family B (small), member 11      | ENST00000371376 |  | -0,530511487 |
| A_23_P385861  | NM_152562        | CDCA2          | cell division cycle associated 2                    | ENST00000435898 |  | -0,530540305 |
| A_23_P119102  | NM_003370        | VASP           | vasodilator-stimulated phosphoprotein               | ENST00000245932 |  | -0,530540736 |
| A_33_P3250680 | NM_000074        | CD40LG         | CD40 ligand                                         | ENST00000370629 |  | -0,53054974  |
| A_33_P3565787 | NR_027329        | KIAA1908       | uncharacterized LOC114796                           |                 |  | -0,530551443 |
| A_23_P315571  | NM_015150        | RFTN1          | raftlin, lipid raft linker 1                        | ENST00000334133 |  | -0,530573787 |
| A_21_P0006605 | TCONS_00017645   | XLOC_008317    |                                                     |                 |  | -0,530588246 |
| A_23_P101683  | NM_001828        | CLC            | Charcot-Leyden crystal protein                      | ENST00000221804 |  | -0,530784859 |
| A_24_P218587  | NM_004268        | MED17          | mediator complex subunit 17                         | ENST00000251871 |  | -0,530864857 |
| A_33_P3371999 | NM_007030        | TPPP           | tubulin polymerization promoting protein            |                 |  | -0,53088283  |
| A_24_P280029  | NM_020315        | PDXP           | pyridoxal (pyridoxine, vitamin B6) phosphatase      | ENST00000451997 |  | -0,530973219 |
| A_21_P0011789 | TCONS_I2_0001343 | XLOC_I2_007176 |                                                     |                 |  | -0,531044649 |
| A_33_P3295328 | NM_001007033     | CLEC6A         | C-type lectin domain family 6, member A             | ENST00000382073 |  | -0,531166173 |
| A_23_P100292  | AK024487         | ZNF598         | zinc finger protein 598                             |                 |  | -0,53119546  |
| A_23_P60387   | NM_017617        | NOTCH1         | notch 1                                             | ENST00000277541 |  | -0,531383694 |
| A_33_P3406493 | NM_005458        | GABBR2         | gamma-aminobutyric acid (GABA) B receptor, 2        | ENST00000259455 |  | -0,531433758 |
| A_24_P277295  | NM_198490        | RAB43          | RAB43, member RAS oncogene family                   | ENST00000315150 |  | -0,531570239 |
| A_24_P193295  | NM_198686        | RAB15          | RAB15, member RAS oncogene family                   | ENST00000533601 |  | -0,531636038 |
| A_23_P1331    | NM_080801        | COL13A1        | collagen, type XIII, alpha 1                        | ENST00000478219 |  | -0,531719662 |
| A_21_P0002458 | TCONS_00004303   | XLOC_002153    |                                                     |                 |  | -0,53192556  |



|                |                   |                |                                                             |                 |              |
|----------------|-------------------|----------------|-------------------------------------------------------------|-----------------|--------------|
| A_21_P0014329  | XR_109307         | LOC100505792   | uncharacterized LOC100505792                                |                 | -0,532137301 |
| A_23_P46455    | NM_014280         | DNAJC8         | DnaJ (Hsp40) homolog, subfamily C, member 8                 |                 | -0,532492976 |
| A_23_P122863   | NM_001001555      | GRB10          | growth factor receptor-bound protein 10                     | ENST00000402497 | -0,532546157 |
| A_23_P119102   | NM_003370         | VASP           | vasodilator-stimulated phosphoprotein                       | ENST00000245932 | -0,532596321 |
| A_23_P114883   | NM_002023         | FMOD           | fibromodulin                                                | ENST00000354955 | -0,53274046  |
| A_21_P0010430  | TCONS_00029633    | XLOC_014288    |                                                             |                 | -0,532924143 |
| A_33_P3300965  | NM_153693         | HOXC6          | homeobox C6                                                 | ENST00000243108 | -0,532928745 |
| A_33_P3418597  | NM_152237         | GAS2L1         | growth arrest-specific 2 like 1                             | ENST00000360113 | -0,533170391 |
| A_33_P3299309  | NM_001136136      | RPL28          | ribosomal protein L28                                       | ENST00000431533 | -0,533317702 |
| A_23_P44155    | NM_198196         | CD96           | CD96 molecule                                               | ENST00000283285 | -0,533428823 |
| A_23_P112531   | NM_001035254      | FAM102A        | family with sequence similarity 102, member A               | ENST00000300434 | -0,533468124 |
| A_24_P382489   | NM_198580         | SLC27A1        | solute carrier family 27 (fatty acid transporter), member 1 | ENST00000252595 | -0,533616586 |
| A_23_P68851    | NM_001039570      | KREMEN1        | kringle containing transmembrane protein 1                  | ENST00000400338 | -0,533845111 |
| A_23_P114903   | NM_002155         | HSPA6          | heat shock 70kDa protein 6 (HSP70B')                        | ENST00000545155 | -0,533878616 |
| A_23_P123172   | NR_002157         | OR2A9P         | olfactory receptor, family 2, subfamily A, member 9 pseudo  | ENST00000461471 | -0,534013256 |
| A_33_P3229032  | NM_002975         | CLEC11A        | C-type lectin domain family 11, member A                    | ENST00000445858 | -0,53422201  |
| A_21_P0005092  | ENST00000439703   | XLOC_005935    |                                                             | ENST00000439703 | -0,534327794 |
| A_23_P151294   | NM_000619         | IFNG           | interferon, gamma                                           | ENST00000229135 | -0,534329127 |
| A_33_P3210139  | NM_015885         | PCF11          | PCF11, cleavage and polyadenylation factor subunit, homol   | ENST00000298281 | -0,534515149 |
| A_23_P1331     | NM_080801         | COL13A1        | collagen, type XIII, alpha 1                                | ENST00000478219 | -0,534522155 |
| A_33_P3372099  | NM_145244         | DDIT4L         | DNA-damage-inducible transcript 4-like                      | ENST00000273990 | -0,534564683 |
| A_23_P210886   | NM_138578         | BCL2L1         | BCL2-like 1                                                 | ENST00000420653 | -0,53480528  |
| A_19_P00321317 | THC2509656        | Q39472         |                                                             |                 | -0,535055152 |
| A_24_P234732   | NM_006454         | MXD4           | MAX dimerization protein 4                                  | ENST00000337190 | -0,535104186 |
| A_21_P0013790  | TCONS_I2_00030329 | XLOC_I2_015596 |                                                             |                 | -0,53518778  |
| A_21_P0003389  | ENST00000420701   | XLOC_003658    |                                                             | ENST00000420701 | -0,535191935 |
| A_23_P384499   | NM_020761         | RPTOR          | regulatory associated protein of MTOR, complex 1            | ENST00000306801 | -0,535237028 |
| A_19_P00800555 | THC2612479        | Q982T4         |                                                             |                 | -0,535253827 |
| A_23_P108437   | NM_003468         | FZD5           | frizzled family receptor 5                                  | ENST00000295417 | -0,535349883 |

|                |                  |                |                                                                    |                 |              |
|----------------|------------------|----------------|--------------------------------------------------------------------|-----------------|--------------|
| A_21_P0014579  | XR_110373        | LOC100507175   | uncharacterized LOC100507175                                       |                 | -0,535439437 |
| A_33_P3343412  | AK096092         | FLJ38773       | uncharacterized protein FLJ38773                                   |                 | -0,535443957 |
| A_33_P3313421  | NM_017754        | UHRF1BP1       | UHRF1 binding protein 1                                            | ENST00000192788 | -0,535520115 |
| A_23_P150281   | NM_001076787     | TP53111        | tumor protein p53 inducible protein 11                             | ENST00000533940 | -0,535532112 |
| A_24_P117323   | NM_032775        | KLHL22         | kelch-like 22 (Drosophila)                                         | ENST00000440659 | -0,535543668 |
| A_23_P148446   | NM_003336        | UBE2A          | ubiquitin-conjugating enzyme E2A                                   | ENST00000371569 | -0,535752367 |
| A_24_P323148   | NM_182573        | LYPD5          | LY6/PLAUR domain containing 5                                      | ENST00000377950 | -0,536001308 |
| A_24_P393372   | NM_001100913     | PACS2          | phosphofurin acidic cluster sorting protein 2                      | ENST00000447393 | -0,536087232 |
| A_33_P3354940  | NM_000757        | CSF1           | colony stimulating factor 1 (macrophage)                           | ENST00000344188 | -0,536102589 |
| A_23_P129903   | NM_001037330     | TRIM16L        | tripartite motif containing 16-like                                | ENST00000395902 | -0,536340551 |
| A_33_P3242743  | NM_001134758     | ARFRP1         | ADP-ribosylation factor related protein 1                          | ENST00000359715 | -0,536411926 |
| A_21_P0006782  | ENST00000444965  | XLOC_008907    |                                                                    | ENST00000444965 | -0,536524383 |
| A_21_P0001542  | TCONS_00001576   | XLOC_000911    |                                                                    |                 | -0,53658505  |
| A_32_P62963    | NR_029392        | KRT16P2        | keratin 16 pseudogene 2                                            |                 | -0,536642758 |
| A_24_P13381    | NM_147204        | TRPV4          | transient receptor potential cation channel, subfamily V, member 4 | ENST00000536838 | -0,536751926 |
| A_23_P122863   | NM_001001555     | GRB10          | growth factor receptor-bound protein 10                            | ENST00000402497 | -0,536754639 |
| A_23_P112554   | NM_001855        | COL15A1        | collagen, type XV, alpha 1                                         | ENST00000375001 | -0,536864274 |
| A_21_P0006257  | TCONS_00016279   | XLOC_007654    |                                                                    |                 | -0,537048338 |
| A_23_P314835   | NM_178456        | C20orf85       | chromosome 20 open reading frame 85                                | ENST00000371168 | -0,53709832  |
| A_32_P111306   | NR_027072        | LINC00189      | long intergenic non-protein coding RNA 189                         | ENST00000431661 | -0,537178401 |
| A_23_P215060   | NM_001018111     | PODXL          | podocalyxin-like                                                   | ENST00000541194 | -0,537180048 |
| A_33_P3353242  | NM_001540        | HSPB1          | heat shock 27kDa protein 1                                         | ENST00000248553 | -0,537284657 |
| A_33_P3356525  | AK127393         | FLJ45482       | uncharacterized LOC645566                                          |                 | -0,537327892 |
| A_23_P111724   | NM_138290        | RUNDC3B        | RUN domain containing 3B                                           | ENST00000493037 | -0,53733075  |
| A_21_P0014580  | XR_110374        | LOC100507195   | uncharacterized LOC100507195                                       |                 | -0,537414017 |
| A_23_P502312   | NM_078481        | CD97           | CD97 molecule                                                      | ENST00000242786 | -0,537421202 |
| A_19_P00808348 | XR_132652        | LOC100506694   |                                                                    |                 | -0,537424389 |
| A_21_P0012423  | TCONS_I2_0001907 | XLOC_I2_010056 |                                                                    |                 | -0,537471608 |
| A_23_P132175   | NM_023004        | RTN4R          | reticulon 4 receptor                                               | ENST00000043402 | -0,537493392 |

|               |                                 |              |                                                             |                 |              |
|---------------|---------------------------------|--------------|-------------------------------------------------------------|-----------------|--------------|
| A_32_P42574   | NM_032800                       | C1orf198     | chromosome 1 open reading frame 198                         | ENST00000366663 | -0,537565415 |
| A_23_P111995  | NM_002318                       | LOXL2        | lysyl oxidase-like 2                                        | ENST00000389131 | -0,53775367  |
| A_33_P3400273 | NM_000655                       | SELL         | selectin L                                                  | ENST00000236147 | -0,53783502  |
| A_21_P0003642 | TCONS_00008209                  | XLOC_003665  |                                                             |                 | -0,537857851 |
| A_21_P0008896 | NR_027755                       | LOC283867    | uncharacterized LOC283867                                   |                 | -0,537996003 |
| A_23_P121716  | NM_005139                       | ANXA3        | annexin A3                                                  | ENST00000505805 | -0,538119897 |
| A_23_P102017  | NM_020711                       | ERMN         | ermin, ERM-like protein                                     | ENST00000397283 | -0,538166365 |
| A_33_P3361337 | NM_001097620                    | TMEM184A     | transmembrane protein 184A                                  | ENST00000468535 | -0,538199333 |
| A_24_P945096  | NM_021096                       | CACNA1I      | calcium channel, voltage-dependent, T type, alpha 1I subun  | ENST00000336649 | -0,538477491 |
| A_23_P56213   | NM_020895                       | GRAMD1A      | GRAM domain containing 1A                                   | ENST00000411896 | -0,53854388  |
| A_21_P0005352 | AK024457                        | LOC100288594 | uncharacterized LOC100288594                                |                 | -0,538568433 |
| A_24_P188800  | NM_017923                       | Mar-01       | membrane-associated ring finger (C3HC4) 1                   | ENST00000339875 | -0,538689597 |
| A_23_P114061  | NM_001007471                    | TRPM3        | transient receptor potential cation channel, subfamily M, m | ENST00000377110 | -0,538747081 |
| A_24_P185709  | NM_012156                       | EPB41L1      | erythrocyte membrane protein band 4.1-like 1                | ENST00000344237 | -0,538778326 |
| A_33_P3238171 | NM_013373                       | ZDHHC8       | zinc finger, DHHC-type containing 8                         | ENST00000334554 | -0,538824795 |
| A_23_P253692  | NM_001079858                    | GPR64        | G protein-coupled receptor 64                               | ENST00000356606 | -0,538842139 |
| A_23_P114883  | NM_002023                       | FMOD         | fibromodulin                                                | ENST00000354955 | -0,538941398 |
| A_23_P108437  | NM_003468                       | FZD5         | frizzled family receptor 5                                  | ENST00000295417 | -0,538963598 |
| A_23_P54840   | NM_005946                       | MT1A         | metallothionein 1A                                          | ENST00000290705 | -0,539019139 |
| A_23_P354805  | NM_007249                       | KLF12        | Kruppel-like factor 12                                      | ENST00000377669 | -0,539055544 |
| A_32_P40596   | NM_001204269                    | KCNA2        | potassium voltage-gated channel, shaker-related subfamily,  | ENST00000369770 | -0,539130288 |
| A_21_P0013798 | TCONS_I2_0003039(XLOC_I2_015641 |              |                                                             |                 | -0,539158675 |
| A_21_P0004058 | ENST00000509456                 | XLOC_004535  |                                                             | ENST00000509456 | -0,539327813 |
| A_33_P3285565 | NM_001306                       | CLDN3        | claudin 3                                                   | ENST00000395145 | -0,539356458 |
| A_23_P204158  | NM_032814                       | RNFT2        | ring finger protein, transmembrane 2                        | ENST00000547718 | -0,539403773 |
| A_32_P184279  | NM_005436                       | CCDC6        | coiled-coil domain containing 6                             | ENST00000263102 | -0,539556147 |
| A_24_P50028   | NM_017516                       | RAB39        | RAB39, member RAS oncogene family                           | ENST00000320578 | -0,539603918 |
| A_33_P3339138 | NM_203400                       | RPRML        | reprimo-like                                                | ENST00000322329 | -0,539607103 |
| A_33_P3405500 | NM_014363                       | SACS         | spastic ataxia of Charlevoix-Saguenay (sacsin)              | ENST00000382298 | -0,539646033 |

|                |                  |                |                                                                  |                 |              |
|----------------|------------------|----------------|------------------------------------------------------------------|-----------------|--------------|
| A_23_P411296   | NM_005194        | CEBPB          | CCAAT/enhancer binding protein (C/EBP), beta                     | ENST00000303004 | -0,53967471  |
| A_23_P122052   | NM_001008397     | GPX8           | glutathione peroxidase 8 (putative)                              | ENST00000503787 | -0,539941113 |
| A_23_P119102   | NM_003370        | VASP           | vasodilator-stimulated phosphoprotein                            | ENST00000245932 | -0,540174456 |
| A_33_P3354451  | NM_007028        | TRIM31         | tripartite motif containing 31                                   | ENST00000540829 | -0,540175042 |
| A_19_P00321306 | NM_020914        | RNF213         |                                                                  | ENST00000456466 | -0,540206209 |
| A_24_P12413    | NM_012288        | TRAM2          | translocation associated membrane protein 2                      | ENST00000182527 | -0,540274889 |
| A_23_P139722   | NM_001065        | TNFRSF1A       | tumor necrosis factor receptor superfamily, member 1A            | ENST00000504738 | -0,540655547 |
| A_23_P115726   | NM_194298        | SLC16A9        | solute carrier family 16, member 9 (monocarboxylic acid tra      | ENST00000395348 | -0,540807316 |
| A_23_P102017   | NM_020711        | ERMN           | ermin, ERM-like protein                                          | ENST00000397283 | -0,540807947 |
| A_21_P0011915  | TCONS_I2_0001456 | XLOC_I2_008013 |                                                                  |                 | -0,540835974 |
| A_23_P100292   | AK024487         | ZNF598         | zinc finger protein 598                                          |                 | -0,540884798 |
| A_33_P3399051  | NM_025045        | BAIAP2L2       | BAI1-associated protein 2-like 2                                 | ENST00000332536 | -0,540896553 |
| A_33_P3322363  | NM_001123366     | HMSD           | histocompatibility (minor) serpin domain containing              | ENST00000408945 | -0,54101567  |
| A_23_P121695   | NM_006419        | CXCL13         | chemokine (C-X-C motif) ligand 13                                | ENST00000286758 | -0,541048842 |
| A_23_P139722   | NM_001065        | TNFRSF1A       | tumor necrosis factor receptor superfamily, member 1A            | ENST00000504738 | -0,541154283 |
| A_23_P11644    | NM_006945        | SPRR2D         | small proline-rich protein 2D                                    | ENST00000368756 | -0,541172361 |
| A_33_P3321946  | NM_023948        | MOSPD3         | motile sperm domain containing 3                                 | ENST00000393953 | -0,541213134 |
| A_21_P0010210  | ENST00000428410  | XLOC_014099    |                                                                  | ENST00000428410 | -0,541224464 |
| A_23_P44836    | NM_022908        | NT5DC2         | 5'-nucleotidase domain containing 2                              | ENST00000478091 | -0,541233053 |
| A_33_P3223958  | NM_016347        | NAT8B          | N-acetyltransferase 8B (GCN5-related, putative, gene/pseudogene) |                 | -0,54136298  |
| A_24_P102880   | NM_020443        | NAV1           | neuron navigator 1                                               | ENST00000367296 | -0,541425992 |
| A_33_P3295358  | NM_139314        | ANGPTL4        | angiopoietin-like 4                                              | ENST00000301455 | -0,541583461 |
| A_21_P0009194  | ENST00000425510  | XLOC_012505    |                                                                  | ENST00000425510 | -0,541712435 |
| A_24_P337657   | NM_003131        | SRF            | serum response factor (c-fos serum response element-bind         | ENST00000265354 | -0,541776974 |
| A_33_P3391220  | NR_037191        | SULT1C2P1      | sulfotransferase family, cytosolic, 1C, member 2 pseudogen       | ENST00000427208 | -0,541807806 |
| A_33_P3270311  | NM_020760        | HECW2          | HECT, C2 and WW domain containing E3 ubiquitin protein li        | ENST00000260983 | -0,541919106 |
| A_33_P3794109  | BC028622         | LOC253805      | uncharacterized LOC253805                                        |                 | -0,541939581 |
| A_33_P3389153  | NM_005990        | STK10          | serine/threonine kinase 10                                       | ENST00000176763 | -0,541988077 |
| A_33_P3253807  | NM_001806        | CEBPG          | CCAAT/enhancer binding protein (C/EBP), gamma                    | ENST00000284000 | -0,542105533 |

|                |                 |                |                                                           |                 |  |              |
|----------------|-----------------|----------------|-----------------------------------------------------------|-----------------|--|--------------|
| A_19_P00318915 | THC2570003      | Q9EPR2         |                                                           |                 |  | -0,542185209 |
| A_23_P112173   | NM_020344       | SLC24A2        | solute carrier family 24 (sodium/potassium/calcium exchan | ENST00000341998 |  | -0,542224252 |
| A_23_P122863   | NM_001001555    | GRB10          | growth factor receptor-bound protein 10                   | ENST00000402497 |  | -0,542224793 |
| A_33_P3323564  | NR_037195       | LOC646324      | uncharacterized LOC646324                                 | ENST00000423530 |  | -0,542275107 |
| A_23_P501877   | NM_018197       | ZFP64          | zinc finger protein 64 homolog (mouse)                    | ENST00000546083 |  | -0,542332503 |
| A_33_P3378659  | NM_001003799    | TARP           | TCR gamma alternate reading frame protein                 | ENST00000443402 |  | -0,542378959 |
| A_23_P70213    | NM_000038       | APC            | adenomatous polyposis coli                                | ENST00000508376 |  | -0,542549441 |
| A_33_P3402868  | NM_000836       | GRIN2D         | glutamate receptor, ionotropic, N-methyl D-aspartate 2D   | ENST00000263269 |  | -0,542561635 |
| A_23_P54816    | NM_001694       | ATP6VOC        | ATPase, H+ transporting, lysosomal 16kDa, V0 subunit c    | ENST00000330398 |  | -0,542616906 |
| A_33_P3370449  | NM_152413       | GOT1L1         | glutamic-oxaloacetic transaminase 1-like 1                | ENST00000307599 |  | -0,542618177 |
| A_23_P214897   | NM_144497       | AKAP12         | A kinase (PRKA) anchor protein 12                         | ENST00000490177 |  | -0,542685711 |
| A_32_P86739    | NM_001010911    | C10orf114      | chromosome 10 open reading frame 114                      | ENST00000377113 |  | -0,542811633 |
| A_23_P411296   | NM_005194       | CEBPB          | CCAAT/enhancer binding protein (C/EBP), beta              | ENST00000303004 |  | -0,543090024 |
| A_21_P0013794  | THC2723961      | XLOC_I2_015632 |                                                           |                 |  | -0,54326066  |
| A_21_P0010158  | ENST00000424837 | XLOC_013918    |                                                           | ENST00000424837 |  | -0,543379226 |
| A_33_P3380457  | NM_022049       | GPR88          | G protein-coupled receptor 88                             | ENST00000315033 |  | -0,543390026 |
| A_33_P3288824  | NM_080720       | H2AFB3         | H2A histone family, member B3                             |                 |  | -0,543467168 |
| A_21_P0014746  | ENST00000436772 | LOC100652965   |                                                           | ENST00000436772 |  | -0,54358824  |
| A_23_P13713    | NM_006262       | PRPH           | peripherin                                                | ENST00000530631 |  | -0,543651248 |
| A_23_P162766   | NM_015296       | DOCK9          | dedicator of cytokinesis 9                                | ENST00000428223 |  | -0,543680502 |
| A_23_P81392    | NM_015238       | WWC1           | WW and C2 domain containing 1                             | ENST00000518204 |  | -0,543809083 |
| A_23_P411296   | NM_005194       | CEBPB          | CCAAT/enhancer binding protein (C/EBP), beta              | ENST00000303004 |  | -0,543876576 |
| A_23_P404091   | NM_152407       | GRPEL2         | GrpE-like 2, mitochondrial (E. coli)                      | ENST00000507562 |  | -0,543972935 |
| A_23_P255876   | NM_012144       | DNAI1          | dynein, axonemal, intermediate chain 1                    | ENST00000396929 |  | -0,544003329 |
| A_23_P100292   | AK024487        | ZNF598         | zinc finger protein 598                                   |                 |  | -0,544012536 |
| A_19_P00318310 | TCONS_00012453  | XLOC_005238    |                                                           |                 |  | -0,54409832  |
| A_33_P3268763  | NM_031434       | TMUB1          | transmembrane and ubiquitin-like domain containing 1      | ENST00000462940 |  | -0,54409923  |
| A_23_P202219   | NM_015916       | CALHM2         | calcium homeostasis modulator 2                           | ENST00000260743 |  | -0,544211148 |
| A_33_P3226832  | NM_001993       | F3             | coagulation factor III (thromboplastin, tissue factor)    | ENST00000370207 |  | -0,544271854 |



|                |                 |              |                                                                  |                 |              |
|----------------|-----------------|--------------|------------------------------------------------------------------|-----------------|--------------|
| A_23_P18672    | NM_020973       | GBA3         | glucosidase, beta, acid 3 (cytosolic)                            | ENST00000511446 | -0,544358726 |
| A_33_P3367392  | NM_032648       | FAM167B      | family with sequence similarity 167, member B                    | ENST00000373582 | -0,544393096 |
| A_23_P369815   | NM_000639       | FASLG        | Fas ligand (TNF superfamily, member 6)                           | ENST00000367721 | -0,54439516  |
| A_21_P0006069  | ENST00000443359 | XLOC_007653  |                                                                  | ENST00000443359 | -0,544490161 |
| A_24_P48204    | NM_003004       | SECTM1       | secreted and transmembrane 1                                     | ENST00000269389 | -0,544510729 |
| A_23_P418413   | NM_005109       | OXSRI        | oxidative-stress responsive 1                                    | ENST00000311806 | -0,544614534 |
| A_24_P854492   | NR_003491       | MIAT         | myocardial infarction associated transcript (non-protein coding) |                 | -0,544628615 |
| A_23_P203173   | NM_001558       | IL10RA       | interleukin 10 receptor, alpha                                   | ENST00000227752 | -0,544654504 |
| A_23_P71946    | NM_017688       | BSPRY        | B-box and SPRY domain containing                                 | ENST00000374183 | -0,544718528 |
| A_23_P411296   | NM_005194       | CEBPB        | CCAAT/enhancer binding protein (C/EBP), beta                     | ENST00000303004 | -0,544740391 |
| A_23_P122863   | NM_001001555    | GRB10        | growth factor receptor-bound protein 10                          | ENST00000402497 | -0,544766894 |
| A_24_P924862   | NM_213589       | RAPH1        | Ras association (RalGDS/AF-6) and pleckstrin homology domain     | ENST00000319170 | -0,544795159 |
| A_33_P3839760  | NM_017914       | C19orf24     | chromosome 19 open reading frame 24                              | ENST00000416408 | -0,544841899 |
| A_33_P3325866  | BC063316        | FBXL17       | F-box and leucine-rich repeat protein 17                         |                 | -0,544862437 |
| A_32_P133884   | NM_001004125    | TUSC1        | tumor suppressor candidate 1                                     | ENST00000358022 | -0,544945047 |
| A_23_P89431    | NM_002982       | CCL2         | chemokine (C-C motif) ligand 2                                   | ENST00000225831 | -0,54501279  |
| A_23_P121480   | NM_001004196    | CD200        | CD200 molecule                                                   | ENST00000478595 | -0,545144446 |
| A_23_P122863   | NM_001001555    | GRB10        | growth factor receptor-bound protein 10                          | ENST00000402497 | -0,545144919 |
| A_21_P0010204  | ENST00000448579 | XLOC_014073  |                                                                  | ENST00000448579 | -0,545190466 |
| A_23_P119102   | NM_003370       | VASP         | vasodilator-stimulated phosphoprotein                            | ENST00000245932 | -0,545264582 |
| A_24_P253251   | NM_003045       | SLC7A1       | solute carrier family 7 (cationic amino acid transporter, y+ s   | ENST00000380752 | -0,545413501 |
| A_21_P0001263  | TCONS_00000840  | XLOC_000055  |                                                                  |                 | -0,545494774 |
| A_23_P109547   | NM_019008       | SMCR7L       | Smith-Magenis syndrome chromosome region, candidate 7            | ENST00000325301 | -0,545829575 |
| A_19_P00318600 | NR_034085       | LOC648987    | uncharacterized LOC648987                                        |                 | -0,545897429 |
| A_24_P322908   | NM_001145073    | USP27X       | ubiquitin specific peptidase 27, X-linked                        |                 | -0,545905433 |
| A_21_P0007812  | TCONS_00021010  | XLOC_010272  |                                                                  |                 | -0,546118177 |
| A_21_P0000173  | NR_045116       | C5orf56      | chromosome 5 open reading frame 56                               | ENST00000464024 | -0,546123977 |
| A_19_P00803019 | XR_110300       | LOC100506965 | uncharacterized LOC100506965                                     |                 | -0,546207529 |
| A_23_P120931   | NM_014508       | APOBEC3C     | apolipoprotein B mRNA editing enzyme, catalytic polypeptide      | ENST00000361441 | -0,546327292 |



|                |                 |             |                                                             |                 |              |
|----------------|-----------------|-------------|-------------------------------------------------------------|-----------------|--------------|
| A_33_P3237250  | NM_001029964    | TLL13       | tubulin tyrosine ligase-like family, member 13              | ENST00000339615 | -0,546382256 |
| A_23_P216622   | NM_001079802    | FKTN        | fukutin                                                     | ENST00000357998 | -0,54661158  |
| A_23_P101084   | NM_032598       | SPATA22     | spermatogenesis associated 22                               | ENST00000541913 | -0,546656257 |
| A_23_P845      | NM_032174       | TOMM40L     | translocase of outer mitochondrial membrane 40 homolog      | ENST00000367988 | -0,546677928 |
| A_33_P3238295  | NR_026788       | FAM66C      | family with sequence similarity 66, member C                | ENST00000544214 | -0,546750382 |
| A_33_P3227443  | NM_175900       | C16orf54    | chromosome 16 open reading frame 54                         | ENST00000329410 | -0,546820221 |
| A_23_P118536   | NM_018042       | SLFN12      | schlafen family member 12                                   | ENST00000479326 | -0,546937614 |
| A_24_P944827   | NM_006395       | ATG7        | ATG7 autophagy related 7 homolog ( <i>S. cerevisiae</i> )   | ENST00000354449 | -0,547026138 |
| A_23_P396062   | NM_021168       | RAB40C      | RAB40C, member RAS oncogene family                          | ENST00000535977 | -0,547128371 |
| A_23_P411296   | NM_005194       | CEBPB       | CCAAT/enhancer binding protein (C/EBP), beta                | ENST00000303004 | -0,547148056 |
| A_23_P126888   | NM_017596       | KIF21B      | kinesin family member 21B                                   | ENST00000332129 | -0,547148736 |
| A_33_P3388983  | AK025221        | C5orf56     | chromosome 5 open reading frame 56                          | ENST00000378947 | -0,547180779 |
| A_33_P3327921  | NM_012249       | RHOQ        | ras homolog gene family, member Q                           |                 | -0,547202223 |
| A_23_P69670    | NM_018366       | CNO         | cappuccino homolog (mouse)                                  | ENST00000320776 | -0,54725645  |
| A_21_P0005166  | TCONS_00012732  | XLOC_005737 |                                                             |                 | -0,547395787 |
| A_23_P65918    | NM_002220       | ITPKA       | inositol-trisphosphate 3-kinase A                           | ENST00000260386 | -0,547608372 |
| A_23_P119102   | NM_003370       | VASP        | vasodilator-stimulated phosphoprotein                       | ENST00000245932 | -0,547650098 |
| A_21_P0008473  | TCONS_00022824  | XLOC_011096 |                                                             |                 | -0,547852309 |
| A_33_P3219245  | NR_023390       | LINC00476   | long intergenic non-protein coding RNA 476                  |                 | -0,547893084 |
| A_21_P0010252  | TCONS_00029029  | XLOC_013950 |                                                             |                 | -0,547897002 |
| A_33_P3364268  | NM_030915       | LBH         | limb bud and heart development homolog (mouse)              | ENST00000467242 | -0,548084753 |
| A_33_P3305288  | NM_198504       | PAQR9       | progesterone and adipoQ receptor family member IX           | ENST00000340634 | -0,548127644 |
| A_23_P97141    | NM_002922       | RGS1        | regulator of G-protein signaling 1                          | ENST00000498352 | -0,548259656 |
| A_23_P397341   | NM_152341       | PAQR4       | progesterone and adipoQ receptor family member IV           | ENST00000293978 | -0,548372901 |
| A_23_P55990    | NM_003827       | NAPA        | N-ethylmaleimide-sensitive factor attachment protein, alpha | ENST00000263354 | -0,548512595 |
| A_24_P687594   | ENST00000369308 | LIX1L       | Lix1 homolog (mouse)-like                                   | ENST00000369308 | -0,548714075 |
| A_33_P3373358  | NM_005497       | GJC1        | gap junction protein, gamma 1, 45kDa                        | ENST00000330514 | -0,548854073 |
| A_23_P30069    | NM_001012967    | DDX60L      | DEAD (Asp-Glu-Ala-Asp) box polypeptide 60-like              | ENST00000511577 | -0,548877047 |
| A_19_P00319295 | NM_020746       | MAVS        |                                                             |                 | -0,548926115 |

|                |                 |                |                                                                      |                 |              |
|----------------|-----------------|----------------|----------------------------------------------------------------------|-----------------|--------------|
| A_33_P3283460  | BC066898        | MIER1          | mesoderm induction early response 1 homolog (Xenopus laevis)         | ENST00000371012 | -0,549127608 |
| A_23_P89431    | NM_002982       | CCL2           | chemokine (C-C motif) ligand 2                                       | ENST00000225831 | -0,549196104 |
| A_21_P0003126  | TCONS_00006527  | XLOC_003152    |                                                                      |                 | -0,549446252 |
| A_23_P118536   | NM_018042       | SLFN12         | schlafen family member 12                                            | ENST00000479326 | -0,549575086 |
| A_21_P0013612  | ENST00000416242 | XLOC_I2_015090 |                                                                      | ENST00000416242 | -0,549626088 |
| A_24_P223124   | NM_022763       | FNDC3B         | fibronectin type III domain containing 3B                            | ENST00000336824 | -0,54979326  |
| A_23_P380181   | NM_006769       | LMO4           | LIM domain only 4                                                    | ENST00000489303 | -0,549838676 |
| A_23_P70213    | NM_000038       | APC            | adenomatous polyposis coli                                           | ENST00000508376 | -0,549958112 |
| A_23_P53724    | NM_014718       | CLSTN3         | calsyntenin 3                                                        | ENST00000266546 | -0,549986359 |
| A_19_P00805954 | TCONS_00011660  | XLOC_005143    |                                                                      |                 | -0,550437657 |
| A_23_P139575   | NM_001005354    | PRR13          | proline rich 13                                                      | ENST00000429243 | -0,550494576 |
| A_19_P00316238 | NM_001145454    | STMN1          | stathmin 1                                                           | ENST00000513116 | -0,550694048 |
| A_33_P3403576  | NM_001136219    | FCGR2A         | Fc fragment of IgG, low affinity IIa, receptor (CD32)                | ENST00000271450 | -0,550815667 |
| A_23_P210425   | NM_181526       | MYL9           | myosin, light chain 9, regulatory                                    | ENST00000279022 | -0,550884669 |
| A_19_P00319837 | NR_038919       | LOC100128993   | uncharacterized LOC100128993                                         | ENST00000517949 | -0,55094334  |
| A_23_P89431    | NM_002982       | CCL2           | chemokine (C-C motif) ligand 2                                       | ENST00000225831 | -0,550953826 |
| A_23_P307955   | NM_031244       | SIRT5          | sirtuin 5                                                            | ENST00000379262 | -0,551059497 |
| A_23_P106602   | NM_031476       | CRISPLD2       | cysteine-rich secretory protein LCCL domain containing 2             | ENST00000262424 | -0,551289857 |
| A_33_P3575529  | AF309699        | OR5E1P         | olfactory receptor, family 5, subfamily E, member 1 pseudogene       |                 | -0,551301375 |
| A_24_P5890     | NM_020535       | KIR2DL5A       | killer cell immunoglobulin-like receptor, two domains, long          | ENST00000391731 | -0,551465859 |
| A_23_P22224    | NM_004095       | EIF4EBP1       | eukaryotic translation initiation factor 4E binding protein 1        | ENST00000338825 | -0,551533363 |
| A_33_P3228558  | NM_199282       | ARHGAP27       | Rho GTPase activating protein 27                                     | ENST00000376922 | -0,551635578 |
| A_23_P411296   | NM_005194       | CEBPB          | CCAAT/enhancer binding protein (C/EBP), beta                         | ENST00000303004 | -0,551873311 |
| A_23_P114353   | NM_032946       | NXF5           | nuclear RNA export factor 5                                          | ENST00000263032 | -0,551892287 |
| A_23_P411296   | NM_005194       | CEBPB          | CCAAT/enhancer binding protein (C/EBP), beta                         | ENST00000303004 | -0,551897004 |
| A_23_P431388   | NM_144569       | SPOCD1         | SPOC domain containing 1                                             | ENST00000294514 | -0,552105462 |
| A_23_P122863   | NM_001001555    | GRB10          | growth factor receptor-bound protein 10                              | ENST00000402497 | -0,55216888  |
| A_33_P3402615  | NM_201649       | SLC6A9         | solute carrier family 6 (neurotransmitter transporter, glycine)      | ENST00000372310 | -0,552390575 |
| A_23_P115726   | NM_194298       | SLC16A9        | solute carrier family 16, member 9 (monocarboxylic acid transporter) | ENST00000395348 | -0,552420413 |

|               |                |              |                                                                     |                 |              |
|---------------|----------------|--------------|---------------------------------------------------------------------|-----------------|--------------|
| A_23_P4962    | NM_153447      | NLRP5        | NLR family, pyrin domain containing 5                               | ENST00000390649 | -0,552460521 |
| A_21_P0000727 | NR_038216      | LOC154092    | uncharacterized LOC154092                                           | ENST00000456749 | -0,552626119 |
| A_23_P411296  | NM_005194      | CEBPB        | CCAAT/enhancer binding protein (C/EBP), beta                        | ENST00000303004 | -0,55266721  |
| A_33_P3412613 | NM_001032283   | TMPO         | thymopoietin                                                        | ENST00000393053 | -0,55271176  |
| A_21_P0002653 | THC2634133     | XLOC_002026  |                                                                     |                 | -0,55282149  |
| A_33_P3674029 | NR_026823      | FAM138D      | family with sequence similarity 138, member D                       |                 | -0,553018172 |
| A_33_P3266285 | NM_001034842   | PTCHD3       | patched domain containing 3                                         | ENST00000438700 | -0,553070292 |
| A_33_P3266780 | NM_015720      | PODXL2       | podocalyxin-like 2                                                  | ENST00000342480 | -0,553112584 |
| A_33_P3381235 | NR_024470      | LOC100127888 | uncharacterized LOC100127888                                        | ENST00000411824 | -0,553221197 |
| A_23_P157268  | NM_012129      | CLDN12       | claudin 12                                                          | ENST00000535571 | -0,553341428 |
| A_32_P110472  | NM_203395      | IYD          | iodotyrosine deiodinase                                             | ENST00000229447 | -0,553390346 |
| A_23_P217339  | NM_005044      | PRKX         | protein kinase, X-linked                                            | ENST00000262848 | -0,553421608 |
| A_23_P153640  | NM_032139      | ANKRD27      | ankyrin repeat domain 27 (VPS9 domain)                              | ENST00000306065 | -0,553492827 |
| A_33_P3350778 | NM_198535      | ZNF699       | zinc finger protein 699                                             | ENST00000308650 | -0,553520414 |
| A_23_P109913  | NM_006564      | CXCR6        | chemokine (C-X-C motif) receptor 6                                  | ENST00000438735 | -0,553528392 |
| A_23_P380857  | NM_030643      | APOL4        | apolipoprotein L, 4                                                 | ENST00000479929 | -0,553623927 |
| A_33_P3369393 | NM_000265      | NCF1         | neutrophil cytosolic factor 1                                       | ENST00000289473 | -0,553707576 |
| A_23_P11070   | NM_032553      | GPR174       | G protein-coupled receptor 174                                      | ENST00000276077 | -0,554064235 |
| A_33_P3285629 | NM_023036      | DNAI2        | dynein, axonemal, intermediate chain 2                              | ENST00000307504 | -0,554273229 |
| A_23_P120931  | NM_014508      | APOBEC3C     | apolipoprotein B mRNA editing enzyme, catalytic polypeptide 3       | ENST00000361441 | -0,554281883 |
| A_24_P152968  | NM_001353      | AKR1C1       | aldo-keto reductase family 1, member C1 (dihydrodiol dehydrogenase) | ENST00000434459 | -0,55432803  |
| A_23_P414328  | NM_145811      | CACNG5       | calcium channel, voltage-dependent, gamma subunit 5                 | ENST00000307139 | -0,554417213 |
| A_21_P0009516 | TCONS_00026396 | XLOC_012747  |                                                                     |                 | -0,554738621 |
| A_21_P0009413 | TCONS_00026155 | XLOC_012568  |                                                                     |                 | -0,554759339 |
| A_23_P65518   | NM_016651      | DACT1        | dapper, antagonist of beta-catenin, homolog 1 (Xenopus laevis)      | ENST00000395151 | -0,554876874 |
| A_23_P20392   | NM_015310      | PSD3         | pleckstrin and Sec7 domain containing 3                             | ENST00000440756 | -0,554877842 |
| A_33_P3278941 | NM_001048205   | REC8         | REC8 homolog (yeast)                                                | ENST00000311457 | -0,554936741 |
| A_23_P78742   | NM_001459      | FLT3LG       | fms-related tyrosine kinase 3 ligand                                | ENST00000344019 | -0,554951145 |
| A_23_P119254  | NM_018154      | ASF1B        | ASF1 anti-silencing function 1 homolog B (S. cerevisiae)            | ENST00000263382 | -0,554997185 |

|               |                 |              |                                                               |                 |              |
|---------------|-----------------|--------------|---------------------------------------------------------------|-----------------|--------------|
| A_33_P3399228 | NM_032808       | LINGO1       | leucine rich repeat and Ig domain containing 1                | ENST00000355300 | -0,555067035 |
| A_23_P357101  | NM_145298       | APOBEC3F     | apolipoprotein B mRNA editing enzyme, catalytic polypeptide   | ENST00000308521 | -0,555079142 |
| A_33_P3329974 | NM_020770       | CGN          | cingulin                                                      | ENST00000271636 | -0,555084097 |
| A_23_P37910   | NM_002746       | MAPK3        | mitogen-activated protein kinase 3                            | ENST00000395202 | -0,555659212 |
| A_23_P304716  | NM_019089       | HES2         | hairy and enhancer of split 2 (Drosophila)                    | ENST00000377834 | -0,555776303 |
| A_23_P121480  | NM_001004196    | CD200        | CD200 molecule                                                | ENST00000478595 | -0,555800639 |
| A_24_P279489  | NM_001128159    | VPS53        | vacuolar protein sorting 53 homolog (S. cerevisiae)           | ENST00000437048 | -0,555904579 |
| A_24_P280762  | NM_030568       | KHDC1        | KH homology domain containing 1                               | ENST00000433730 | -0,556322477 |
| A_23_P76983   | NM_025057       | C14orf45     | chromosome 14 open reading frame 45                           | ENST00000394009 | -0,556409147 |
| A_23_P121596  | NM_002704       | PPBP         | pro-platelet basic protein (chemokine (C-X-C motif) ligand 7) | ENST00000296028 | -0,556455625 |
| A_33_P3256303 | NM_001206609    | SELPLG       | selectin P ligand                                             | ENST00000388962 | -0,55645904  |
| A_23_P162165  | NM_023930       | KCTD14       | potassium channel tetramerisation domain containing 14        | ENST00000353172 | -0,556638773 |
| A_21_P0000788 | NR_038402       | LOC100507387 | uncharacterized LOC100507387                                  | ENST00000513787 | -0,556687633 |
| A_23_P423197  | NM_002957       | RXRA         | retinoid X receptor, alpha                                    | ENST00000356384 | -0,556983165 |
| A_23_P308150  | NM_152424       | FAM123B      | family with sequence similarity 123B                          | ENST00000330258 | -0,556990176 |
| A_23_P147605  | NM_001003676    | C11orf49     | chromosome 11 open reading frame 49                           | ENST00000278460 | -0,557007612 |
| A_24_P144377  | NM_014015       | DEXI         | Dexi homolog (mouse)                                          | ENST00000331808 | -0,557038949 |
| A_21_P0005584 | NR_034033       | LOC285972    | uncharacterized LOC285972                                     |                 | -0,557136809 |
| A_21_P0010421 | TCONS_00029614  | XLOC_014268  |                                                               |                 | -0,55721733  |
| A_21_P0005820 | ENST00000519764 | XLOC_007057  |                                                               | ENST00000519764 | -0,557410145 |
| A_24_P48069   | NM_018110       | DOK4         | docking protein 4                                             | ENST00000340099 | -0,557518675 |
| A_32_P43812   | NM_001040402    | DCUN1D4      | DCN1, defective in cullin neddylation 1, domain containing 4  | ENST00000477560 | -0,557658558 |
| A_24_P354715  | NM_002526       | NT5E         | 5'-nucleotidase, ecto (CD73)                                  | ENST00000257770 | -0,557669335 |
| A_33_P3257367 | NM_015906       | TRIM33       | tripartite motif containing 33                                | ENST00000358465 | -0,557742309 |
| A_23_P126844  | NM_148965       | TNFRSF25     | tumor necrosis factor receptor superfamily, member 25         | ENST00000513135 | -0,557951134 |
| A_23_P108437  | NM_003468       | FZD5         | frizzled family receptor 5                                    | ENST00000295417 | -0,557970444 |
| A_23_P3911    | NM_020405       | PLXDC1       | plexin domain containing 1                                    | ENST00000444911 | -0,558174545 |
| A_23_P37892   | NM_133443       | GPT2         | glutamic pyruvate transaminase (alanine aminotransferase)     | ENST00000440783 | -0,558181768 |
| A_24_P927716  | NR_003542       | SLED1        | proteoglycan 3 pseudogene                                     | ENST00000506741 | -0,558190925 |

|               |                 |              |                                                                |                 |              |
|---------------|-----------------|--------------|----------------------------------------------------------------|-----------------|--------------|
| A_23_P203558  | NM_000518       | HBB          | hemoglobin, beta                                               | ENST00000335295 | -0,558285356 |
| A_33_P3315314 | NM_005951       | MT1H         | metallothionein 1H                                             | ENST00000332374 | -0,558603903 |
| A_21_P0012193 | NR_024027       | LINC00158    | long intergenic non-protein coding RNA 158                     |                 | -0,558613312 |
| A_23_P126613  | NM_080429       | AQP10        | aquaporin 10                                                   | ENST00000484864 | -0,558716363 |
| A_23_P104762  | NM_006106       | YAP1         | Yes-associated protein 1                                       | ENST00000531439 | -0,558807248 |
| A_23_P89431   | NM_002982       | CCL2         | chemokine (C-C motif) ligand 2                                 | ENST00000225831 | -0,558963748 |
| A_33_P3264404 | AK098270        | LOC100132593 | uncharacterized LOC100132593                                   |                 | -0,558981337 |
| A_32_P83049   | NM_014971       | EFR3B        | EFR3 homolog B ( <i>S. cerevisiae</i> )                        |                 | -0,559095855 |
| A_21_P0006853 | ENST00000420945 | XLOC_008441  |                                                                | ENST00000420945 | -0,559143895 |
| A_33_P3289820 | NM_001134382    | IQSEC1       | IQ motif and Sec7 domain 1                                     | ENST00000435445 | -0,559147281 |
| A_24_P390668  | NM_005892       | FMNL1        | formin-like 1                                                  | ENST00000539884 | -0,559149288 |
| A_23_P8185    | NM_006519       | DYNLT1       | dynein, light chain, Tctex-type 1                              | ENST00000367088 | -0,559186714 |
| A_23_P107421  | NM_003258       | TK1          | thymidine kinase 1, soluble                                    | ENST00000405273 | -0,559334983 |
| A_24_P23034   | NM_021035       | ZNFX1        | zinc finger, NFX1-type containing 1                            | ENST00000537431 | -0,559397017 |
| A_23_P571     | NM_006516       | SLC2A1       | solute carrier family 2 (facilitated glucose transporter), men | ENST00000426263 | -0,559409654 |
| A_23_P103877  | NM_001010847    | LRRC38       | leucine rich repeat containing 38                              | ENST00000376085 | -0,559478295 |
| A_23_P111995  | NM_002318       | LOXL2        | lysyl oxidase-like 2                                           | ENST00000389131 | -0,559520714 |
| A_23_P128663  | NM_014363       | SACS         | spastic ataxia of Charlevoix-Saguenay (sacsin)                 | ENST00000382298 | -0,559547182 |
| A_23_P218068  | NM_019012       | PLEKHA5      | pleckstrin homology domain containing, family A member 5       | ENST00000542828 | -0,559554268 |
| A_23_P60387   | NM_017617       | NOTCH1       | notch 1                                                        | ENST00000277541 | -0,559558526 |
| A_23_P123172  | NR_002157       | OR2A9P       | olfactory receptor, family 2, subfamily A, member 9 pseudo     | ENST00000461471 | -0,559686892 |
| A_33_P3214035 | NM_000675       | ADORA2A      | adenosine A2a receptor                                         | ENST00000436735 | -0,559709832 |
| A_23_P252236  | NM_000892       | KLKB1        | kallikrein B, plasma (Fletcher factor) 1                       | ENST00000511406 | -0,559864425 |
| A_21_P0012019 | XR_109876       | LOC100506563 | uncharacterized LOC100506563                                   | ENST00000458252 | -0,560085936 |
| A_23_P118254  | NM_001451       | FOXF1        | forkhead box F1                                                | ENST00000262426 | -0,560125549 |
| A_33_P3227506 | NM_182641       | BPTF         | bromodomain PHD finger transcription factor                    | ENST00000342579 | -0,56024152  |
| A_23_P62881   | NM_032291       | SGIP1        | SH3-domain GRB2-like (endophilin) interacting protein 1        | ENST00000435165 | -0,56025605  |
| A_23_P120931  | NM_014508       | APOBEC3C     | apolipoprotein B mRNA editing enzyme, catalytic polypeptid     | ENST00000361441 | -0,560376406 |
| A_23_P31896   | NM_003033       | ST3GAL1      | ST3 beta-galactoside alpha-2,3-sialyltransferase 1             | ENST00000522652 | -0,560542018 |



|               |                 |              |                                                                |                 |              |
|---------------|-----------------|--------------|----------------------------------------------------------------|-----------------|--------------|
| A_23_P141802  | NM_001040147    | SERPINB7     | serpin peptidase inhibitor, clade B (ovalbumin), member 7      | ENST00000540675 | -0,560627841 |
| A_23_P139722  | NM_001065       | TNFRSF1A     | tumor necrosis factor receptor superfamily, member 1A          | ENST00000504738 | -0,560697354 |
| A_33_P3249746 | NM_001190484    | CYP3A5       | cytochrome P450, family 3, subfamily A, polypeptide 5          | ENST00000343703 | -0,560778577 |
| A_23_P104972  | NM_023945       | MS4A5        | membrane-spanning 4-domains, subfamily A, member 5             | ENST00000300190 | -0,560823409 |
| A_23_P155688  | NM_021114       | SPINK2       | serine peptidase inhibitor, Kazal type 2 (acrosin-trypsin inhi | ENST00000248701 | -0,560858829 |
| A_21_P0006135 | TCONS_00015940  | XLOC_007308  |                                                                |                 | -0,561119042 |
| A_23_P418234  | NM_015020       | PHLPP2       | PH domain and leucine rich repeat protein phosphatase 2        | ENST00000356272 | -0,56142994  |
| A_21_P0014052 | XM_294675       | LOC338667    | uncharacterized LOC338667                                      |                 | -0,561568047 |
| A_33_P3404489 | NM_001177465    | MAMLD1       | mastermind-like domain containing 1                            | ENST00000358892 | -0,561623887 |
| A_21_P0014423 | XR_109706       | LOC100506075 | uncharacterized LOC100506075                                   |                 | -0,56172113  |
| A_24_P101629  | NM_001078172    | FAM127B      | family with sequence similarity 127, member B                  | ENST00000522309 | -0,56172498  |
| A_32_P62863   | NM_014575       | SCHIP1       | schwannomin interacting protein 1                              | ENST00000412423 | -0,561880513 |
| A_23_P91104   | NM_002246       | KCNK3        | potassium channel, subfamily K, member 3                       | ENST00000538762 | -0,561924308 |
| A_33_P3221034 | NM_001193628    | LOC147670    | uncharacterized LOC147670                                      |                 | -0,562015287 |
| A_23_P102117  | NM_025216       | WNT10A       | wingless-type MMTV integration site family, member 10A         | ENST00000258411 | -0,562068243 |
| A_23_P104073  | NM_002960       | S100A3       | S100 calcium binding protein A3                                | ENST00000368712 | -0,562073321 |
| A_21_P0006988 | TCONS_00018492  | XLOC_008792  |                                                                |                 | -0,562102967 |
| A_23_P37484   | NM_014918       | CHSY1        | chondroitin sulfate synthase 1                                 | ENST00000254190 | -0,56217799  |
| A_23_P122976  | NM_002069       | GNAI1        | guanine nucleotide binding protein (G protein), alpha inhibi   | ENST00000351004 | -0,562312759 |
| A_24_P8220    | NM_004807       | HS6ST1       | heparan sulfate 6-O-sulfotransferase 1                         | ENST00000259241 | -0,562517469 |
| A_33_P3368049 | NM_001242659    | LOC643988    | uncharacterized LOC643988                                      |                 | -0,562555579 |
| A_23_P101319  | NM_152354       | ZNF285       | zinc finger protein 285                                        | ENST00000544719 | -0,562687262 |
| A_24_P373844  | NM_024076       | KCTD15       | potassium channel tetramerisation domain containing 15         | ENST00000284006 | -0,562754151 |
| A_23_P42931   | NM_001080511    | CLEC2L       | C-type lectin domain family 2, member L                        | ENST00000520413 | -0,562933854 |
| A_24_P96961   | NM_025106       | SPSB1        | splA/ryanodine receptor domain and SOCS box containing 1       | ENST00000328089 | -0,563150412 |
| A_23_P106602  | NM_031476       | CRISPLD2     | cysteine-rich secretory protein LCCL domain containing 2       | ENST00000262424 | -0,563174853 |
| A_24_P721699  | NR_015380       | A1BG-AS1     | A1BG antisense RNA 1 (non-protein coding)                      |                 | -0,563260903 |
| A_23_P168339  | NM_002377       | MAS1         | MAS1 oncogene                                                  | ENST00000252660 | -0,563270668 |
| A_21_P0001832 | ENST00000442387 | XLOC_001365  |                                                                | ENST00000442387 | -0,563630998 |



|               |                                 |                |                                                        |                 |              |
|---------------|---------------------------------|----------------|--------------------------------------------------------|-----------------|--------------|
| A_33_P3279949 | AK124170                        | LOC100128170   | uncharacterized LOC100128170                           |                 | -0,563744878 |
| A_24_P261259  | NM_004566                       | PFKFB3         | 6-phosphofructo-2-kinase/fructose-2,6-biphosphatase 3  | ENST00000379784 | -0,563814799 |
| A_33_P3267330 | NR_003245                       | HAR1B          | highly accelerated region 1B (non-protein coding)      |                 | -0,564038882 |
| A_23_P210886  | NM_138578                       | BCL2L1         | BCL2-like 1                                            | ENST00000420653 | -0,564052789 |
| A_33_P3340264 | ENST00000399397                 | OTOG           | otogelin                                               | ENST00000399397 | -0,564086706 |
| A_24_P350576  | NM_015028                       | TNIK           | TRAF2 and NCK interacting kinase                       | ENST00000369326 | -0,564233281 |
| A_23_P161218  | NM_014391                       | ANKRD1         | ankyrin repeat domain 1 (cardiac muscle)               | ENST00000371697 | -0,564240161 |
| A_23_P146551  | NM_024761                       | MOB3B          | MOB kinase activator 3B                                | ENST00000262244 | -0,564265351 |
| A_33_P3402817 | NM_001145148                    | CRHR1          | corticotropin releasing hormone receptor 1             | ENST00000339069 | -0,56438893  |
| A_33_P3367647 | NM_001077706                    | ECT2L          | epithelial cell transforming sequence 2 oncogene-like  | ENST00000401414 | -0,564417175 |
| A_21_P0010528 | TCONS_I2_0000027;XLOC_I2_000196 |                |                                                        |                 | -0,564515817 |
| A_23_P89431   | NM_002982                       | CCL2           | chemokine (C-C motif) ligand 2                         | ENST00000225831 | -0,564600958 |
| A_33_P3327479 | NM_016598                       | ZDHHC3         | zinc finger, DHHC-type containing 3                    | ENST00000339420 | -0,564604404 |
| A_23_P26583   | NM_032206                       | NLRC5          | NLR family, CARD domain containing 5                   | ENST00000545081 | -0,564665202 |
| A_23_P335848  | NM_057169                       | GIT2           | G protein-coupled receptor kinase interacting ArfGAP 2 | ENST00000361006 | -0,564696042 |
| A_23_P151209  | NM_030809                       | CSRNP2         | cysteine-serine-rich nuclear protein 2                 | ENST00000228515 | -0,564736612 |
| A_33_P3315223 | NM_006805                       | HNRNPA0        | heterogeneous nuclear ribonucleoprotein A0             | ENST00000314940 | -0,564800445 |
| A_23_P201731  | NM_004619                       | TRAF5          | TNF receptor-associated factor 5                       | ENST00000336184 | -0,564832954 |
| A_33_P3221438 | NM_152531                       | XXYLT1         | xyloside xylosyltransferase 1                          | ENST00000310380 | -0,564899204 |
| A_23_P117582  | NM_130469                       | JDP2           | Jun dimerization protein 2                             | ENST00000435893 | -0,564980422 |
| A_23_P89431   | NM_002982                       | CCL2           | chemokine (C-C motif) ligand 2                         | ENST00000225831 | -0,565041034 |
| A_33_P3420204 | NM_001098482                    | CRTC1          | CREB regulated transcription coactivator 1             | ENST00000338797 | -0,565042626 |
| A_23_P435521  | NM_145041                       | TMEM106A       | transmembrane protein 106A                             | ENST00000331615 | -0,565056179 |
| A_23_P72737   | NM_003641                       | IFITM1         | interferon induced transmembrane protein 1 (9-27)      | ENST00000452428 | -0,565126001 |
| A_23_P390726  | NM_144725                       | TTC23L         | tetratricopeptide repeat domain 23-like                | ENST00000514080 | -0,565297767 |
| A_21_P0011542 | TCONS_I2_0001077(XLOC_I2_005781 |                |                                                        |                 | -0,56550454  |
| A_21_P0013258 | THC2565454                      | XLOC_I2_013532 |                                                        |                 | -0,565820887 |
| A_23_P411296  | NM_005194                       | CEBPB          | CCAAT/enhancer binding protein (C/EBP), beta           | ENST00000303004 | -0,566122883 |
| A_23_P102117  | NM_025216                       | WNT10A         | wingless-type MMTV integration site family, member 10A | ENST00000258411 | -0,566293571 |

|                |                 |                |                                                               |                 |              |
|----------------|-----------------|----------------|---------------------------------------------------------------|-----------------|--------------|
| A_19_P00315524 | NR_003491       | MIAT           |                                                               |                 | -0,566310036 |
| A_23_P16166    | NM_006702       | PNPLA6         | patatin-like phospholipase domain containing 6                | ENST00000414982 | -0,566410977 |
| A_23_P142974   | NM_001007231    | ARHGAP25       | Rho GTPase activating protein 25                              | ENST00000295381 | -0,566701178 |
| A_33_P3328772  | NM_001190860    | PLEKHA5        | pleckstrin homology domain containing, family A member 5      | ENST00000540972 | -0,567010156 |
| A_33_P3344282  | BC038847        | HS1BP3         | HCLS1 binding protein 3                                       | ENST00000406618 | -0,567040844 |
| A_24_P941441   | NM_006572       | GNA13          | guanine nucleotide binding protein (G protein), alpha 13      | ENST00000439174 | -0,5670785   |
| A_23_P3014     | NM_005615       | RNASE6         | ribonuclease, RNase A family, k6                              | ENST00000304677 | -0,567268816 |
| A_21_P0003309  | TCONS_00007321  | XLOC_003354    |                                                               |                 | -0,567269851 |
| A_23_P112531   | NM_001035254    | FAM102A        | family with sequence similarity 102, member A                 | ENST00000300434 | -0,567554914 |
| A_33_P3226420  | ENST00000474872 | RSAD2          | radical S-adenosyl methionine domain containing 2             | ENST00000474872 | -0,567669276 |
| A_23_P89431    | NM_002982       | CCL2           | chemokine (C-C motif) ligand 2                                | ENST00000225831 | -0,567909788 |
| A_33_P3298425  | NM_006769       | LMO4           | LIM domain only 4                                             | ENST00000489303 | -0,568252398 |
| A_24_P125881   | NM_005137       | DGCR2          | DiGeorge syndrome critical region gene 2                      | ENST00000545799 | -0,568355989 |
| A_23_P66050    | NM_033309       | B3GNT9         | UDP-GlcNAc:betaGal beta-1,3-N-acetylglucosaminyltransferase 9 |                 | -0,568412767 |
| A_33_P3618429  | AK095793        | PRKXP1         | protein kinase, X-linked, pseudogene 1                        |                 | -0,568419899 |
| A_23_P89431    | NM_002982       | CCL2           | chemokine (C-C motif) ligand 2                                | ENST00000225831 | -0,568573303 |
| A_21_P0003448  | ENST00000507932 | XLOC_003890    |                                                               | ENST00000507932 | -0,569045146 |
| A_24_P226008   | NM_007283       | MGLL           | monoglyceride lipase                                          | ENST00000536024 | -0,569273184 |
| A_21_P0011220  | ENST00000413501 | XLOC_l2_003911 |                                                               | ENST00000413501 | -0,569287537 |
| A_23_P30666    | NM_014452       | TNFRSF21       | tumor necrosis factor receptor superfamily, member 21         | ENST00000419206 | -0,569356644 |
| A_23_P117782   | NM_018357       | LARP6          | La ribonucleoprotein domain family, member 6                  | ENST00000299213 | -0,56951119  |
| A_33_P3243069  | NM_001162893    | KIAA0040       | KIAA0040                                                      |                 | -0,569565059 |
| A_23_P21057    | NM_052838       | Sep-01         | septin 1                                                      | ENST00000321367 | -0,569578213 |
| A_23_P250122   | NM_020223       | FAM20C         | family with sequence similarity 20, member C                  | ENST00000313766 | -0,569658101 |
| A_21_P0001172  | ENST00000450546 | XLOC_000991    |                                                               | ENST00000450546 | -0,569687719 |
| A_23_P100292   | AK024487        | ZNF598         | zinc finger protein 598                                       |                 | -0,569738878 |
| A_23_P368195   | NM_173491       | LSM11          | LSM11, U7 small nuclear RNA associated                        | ENST00000286307 | -0,569792501 |
| A_23_P44244    | NM_003069       | SMARCA1        | SWI/SNF related, matrix associated, actin dependent regula    | ENST00000371122 | -0,569901904 |
| A_24_P37264    | NM_014746       | RNF144A        | ring finger protein 144A                                      | ENST00000320892 | -0,569918389 |

|                |                 |                |                                                              |                 |              |
|----------------|-----------------|----------------|--------------------------------------------------------------|-----------------|--------------|
| A_23_P89431    | NM_002982       | CCL2           | chemokine (C-C motif) ligand 2                               | ENST00000225831 | -0,570039295 |
| A_23_P44505    | NM_003597       | KLF11          | Kruppel-like factor 11                                       | ENST00000535335 | -0,570049861 |
| A_21_P0010606  | DB520278        | XLOC_I2_000864 |                                                              |                 | -0,57012904  |
| A_23_P128868   | NM_001013354    | OR11H12        | olfactory receptor, family 11, subfamily H, member 12        | ENST00000550708 | -0,570192474 |
| A_23_P112531   | NM_001035254    | FAM102A        | family with sequence similarity 102, member A                | ENST00000300434 | -0,570231638 |
| A_23_P122976   | NM_002069       | GNAI1          | guanine nucleotide binding protein (G protein), alpha inhibi | ENST00000351004 | -0,57023606  |
| A_33_P3285992  | AK125618        | VKORC1         | vitamin K epoxide reductase complex, subunit 1               | ENST00000498155 | -0,570343406 |
| A_21_P0007473  | TCONS_00020154  | XLOC_009604    |                                                              |                 | -0,570405523 |
| A_19_P00321692 | ENST00000447453 | XLOC_002142    |                                                              | ENST00000447453 | -0,570419489 |
| A_33_P3361891  | NM_001042575    | TMPRSS7        | transmembrane protease, serine 7                             | ENST00000419127 | -0,570460141 |
| A_23_P117582   | NM_130469       | JDP2           | Jun dimerization protein 2                                   | ENST00000435893 | -0,570610292 |
| A_23_P91414    | NM_080625       | C20orf160      | chromosome 20 open reading frame 160                         | ENST00000262659 | -0,570642616 |
| A_32_P4262     | NM_015585       | C20orf26       | chromosome 20 open reading frame 26                          | ENST00000389655 | -0,570703282 |
| A_23_P111311   | NM_144497       | AKAP12         | A kinase (PRKA) anchor protein 12                            | ENST00000253332 | -0,570759933 |
| A_23_P344194   | NM_001013635    | C12orf68       | chromosome 12 open reading frame 68                          | ENST00000316554 | -0,570852517 |
| A_23_P201747   | NM_007365       | PADI2          | peptidyl arginine deiminase, type II                         | ENST00000375486 | -0,570939318 |
| A_23_P90419    | NM_025245       | PBX4           | pre-B-cell leukemia homeobox 4                               | ENST00000251203 | -0,570978817 |
| A_23_P110430   | NM_002448       | MSX1           | msh homeobox 1                                               | ENST00000382723 | -0,571090235 |
| A_23_P411296   | NM_005194       | CEBPB          | CCAAT/enhancer binding protein (C/EBP), beta                 | ENST00000303004 | -0,571121534 |
| A_33_P3286724  | NM_002663       | PLD2           | phospholipase D2                                             | ENST00000263088 | -0,571151552 |
| A_24_P201171   | NM_003165       | STXBP1         | syntaxin binding protein 1                                   | ENST00000373299 | -0,57116909  |
| A_23_P57760    | NM_152282       | ACPL2          | acid phosphatase-like 2                                      | ENST00000393007 | -0,571391692 |
| A_21_P0005032  | THC2666473      | XLOC_005763    |                                                              |                 | -0,57169639  |
| A_32_P197489   | NM_015995       | KLF13          | Kruppel-like factor 13                                       | ENST00000307145 | -0,572015628 |
| A_21_P0000764  | NR_038324       | LOC100505768   | uncharacterized LOC100505768                                 | ENST00000452509 | -0,572134635 |
| A_24_P284523   | NM_002446       | MAP3K10        | mitogen-activated protein kinase kinase kinase 10            | ENST00000253055 | -0,572332795 |
| A_23_P120931   | NM_014508       | APOBEC3C       | apolipoprotein B mRNA editing enzyme, catalytic polypepti    | ENST00000361441 | -0,57272633  |
| A_23_P415395   | NM_145208       | MBD3L1         | methyl-CpG binding domain protein 3-like 1                   | ENST00000305625 | -0,5727281   |
| A_24_P63136    | NM_176894       | P2RY13         | purinergic receptor P2Y, G-protein coupled, 13               | ENST00000325602 | -0,57273156  |

|                |                 |                |                                                              |                 |              |
|----------------|-----------------|----------------|--------------------------------------------------------------|-----------------|--------------|
| A_23_P121596   | NM_002704       | PPBP           | pro-platelet basic protein (chemokine (C-X-C motif) ligand 7 | ENST00000296028 | -0,572900045 |
| A_33_P3423585  | NM_001080534    | UNC13C         | unc-13 homolog C (C. elegans)                                | ENST00000260323 | -0,572919009 |
| A_23_P120931   | NM_014508       | APOBEC3C       | apolipoprotein B mRNA editing enzyme, catalytic polypeptide  | ENST00000361441 | -0,572970222 |
| A_23_P89431    | NM_002982       | CCL2           | chemokine (C-C motif) ligand 2                               | ENST00000225831 | -0,572979705 |
| A_21_P0009690  | TCONS_00026930  | XLOC_012991    |                                                              |                 | -0,57303561  |
| A_23_P11070    | NM_032553       | GPR174         | G protein-coupled receptor 174                               | ENST00000276077 | -0,573070575 |
| A_23_P92499    | NM_003264       | TLR2           | toll-like receptor 2                                         | ENST00000260010 | -0,573073352 |
| A_23_P139722   | NM_001065       | TNFRSF1A       | tumor necrosis factor receptor superfamily, member 1A        | ENST00000504738 | -0,5733591   |
| A_23_P112531   | NM_001035254    | FAM102A        | family with sequence similarity 102, member A                | ENST00000300434 | -0,57356722  |
| A_19_P00805339 | AK022898        | Q6UWM8         |                                                              |                 | -0,573617933 |
| A_21_P0012775  | ENST00000509098 | XLOC_l2_011114 |                                                              | ENST00000509098 | -0,573647702 |
| A_23_P501538   | NM_153631       | HOXA3          | homeobox A3                                                  | ENST00000317201 | -0,57368403  |
| A_33_P3383236  | NM_198559       | C2orf62        | chromosome 2 open reading frame 62                           | ENST00000494447 | -0,573882624 |
| A_24_P278126   | NM_002485       | NBN            | nibrin                                                       | ENST00000396252 | -0,573990594 |
| A_23_P143016   | NM_212481       | ARID5A         | AT rich interactive domain 5A (MRF1-like)                    | ENST00000412735 | -0,574044898 |
| A_24_P48587    | NM_172341       | PSENE1         | presenilin enhancer 2 homolog (C. elegans)                   | ENST00000222266 | -0,574118108 |
| A_23_P90626    | NM_004288       | CYTIP          | cytohesin 1 interacting protein                              | ENST00000540637 | -0,574291285 |
| A_24_P32085    | NM_024761       | MOB3B          | MOB kinase activator 3B                                      | ENST00000262244 | -0,574307362 |
| A_21_P0014622  | XR_113294       | FAM85A         | family with sequence similarity 85, member A                 |                 | -0,574364159 |
| A_23_P130182   | NM_004217       | AURKB          | aurora kinase B                                              | ENST00000534871 | -0,574375735 |
| A_23_P103511   | NM_001085375    | C1orf226       | chromosome 1 open reading frame 226                          | ENST00000458626 | -0,574598942 |
| A_19_P00804072 | NM_020914       | RNF213         |                                                              | ENST00000456466 | -0,574823056 |
| A_23_P28434    | NM_003761       | VAMP8          | vesicle-associated membrane protein 8 (endobrevin)           | ENST00000263864 | -0,574983948 |
| A_33_P3232557  | NM_001080418    | DLGAP3         | discs, large (Drosophila) homolog-associated protein 3       | ENST00000373347 | -0,575187423 |
| A_33_P3540143  | NM_014339       | IL17RA         | interleukin 17 receptor A                                    | ENST00000319363 | -0,575511706 |
| A_21_P0014553  | XR_110283       | LOC100506303   | uncharacterized LOC100506303                                 |                 | -0,575598229 |
| A_19_P00805548 | NM_004329       | BMPRI1A        | bone morphogenetic protein receptor, type IA                 | ENST00000224764 | -0,575623985 |
| A_23_P102017   | NM_020711       | ERMN           | ermin, ERM-like protein                                      | ENST00000397283 | -0,575866217 |
| A_23_P112531   | NM_001035254    | FAM102A        | family with sequence similarity 102, member A                | ENST00000300434 | -0,576290377 |

|               |                  |                |                                                                     |                 |              |
|---------------|------------------|----------------|---------------------------------------------------------------------|-----------------|--------------|
| A_23_P42116   | NM_005155        | PPT2           | palmitoyl-protein thioesterase 2                                    | ENST00000547508 | -0,576585186 |
| A_33_P3344618 | NM_007162        | TFEB           | transcription factor EB                                             | ENST00000373033 | -0,576909895 |
| A_33_P3283552 | NR_038890        | LOC100132781   | cyclin Y-like 1 pseudogene                                          |                 | -0,576977998 |
| A_23_P108437  | NM_003468        | FZD5           | frizzled family receptor 5                                          | ENST00000295417 | -0,576981561 |
| A_23_P103511  | NM_001085375     | C1orf226       | chromosome 1 open reading frame 226                                 | ENST00000458626 | -0,577209547 |
| A_23_P344408  | NM_022579        | CSHL1          | chorionic somatomammotropin hormone-like 1                          | ENST00000450719 | -0,577352271 |
| A_32_P172848  | NM_000167        | GK             | glycerol kinase                                                     | ENST00000471362 | -0,577352514 |
| A_33_P3285734 | NM_001004310     | FCRL6          | Fc receptor-like 6                                                  | ENST00000392235 | -0,577488566 |
| A_23_P369815  | NM_000639        | FASLG          | Fas ligand (TNF superfamily, member 6)                              | ENST00000367721 | -0,577489198 |
| A_21_P0011035 | ENST00000537616  | XLOC_I2_002886 |                                                                     | ENST00000537616 | -0,577599337 |
| A_33_P3267467 | ENST00000381985  | RFX3           | regulatory factor X, 3 (influences HLA class II expression)         | ENST00000381985 | -0,577631686 |
| A_23_P82651   | NM_002523        | NPTX2          | neuronal pentraxin II                                               | ENST00000265634 | -0,577745525 |
| A_23_P319792  | NM_019001        | XRN1           | 5'-3' exoribonuclease 1                                             | ENST00000264951 | -0,577943296 |
| A_24_P117029  | NM_000527        | LDLR           | low density lipoprotein receptor                                    | ENST00000252444 | -0,578021292 |
| A_23_P139722  | NM_001065        | TNFRSF1A       | tumor necrosis factor receptor superfamily, member 1A               | ENST00000504738 | -0,578269198 |
| A_21_P0000556 | NR_028301        | LOC344595      | uncharacterized LOC344595                                           |                 | -0,57837382  |
| A_21_P0012892 | TCONS_I2_0002280 | XLOC_I2_011954 |                                                                     |                 | -0,57852577  |
| A_23_P66881   | NM_003835        | RGS9           | regulator of G-protein signaling 9                                  | ENST00000262406 | -0,57864824  |
| A_21_P0013176 | BQ441651         | XLOC_I2_013293 |                                                                     |                 | -0,57865274  |
| A_24_P396375  | NM_001113347     | ECE1           | endothelin converting enzyme 1                                      | ENST00000415912 | -0,578814189 |
| A_23_P108501  | NM_004438        | EPHA4          | EPH receptor A4                                                     | ENST00000392071 | -0,578991367 |
| A_23_P410110  | NM_001039380     | C10orf25       | chromosome 10 open reading frame 25                                 | ENST00000298298 | -0,578995658 |
| A_24_P751074  | NM_005238        | ETS1           | v-ets erythroblastosis virus E26 oncogene homolog 1 (avian          | ENST00000392668 | -0,579071172 |
| A_23_P68487   | NM_001719        | BMP7           | bone morphogenetic protein 7                                        | ENST00000395863 | -0,579074281 |
| A_33_P3404706 | NM_001030288     | SPN            | sialophorin                                                         | ENST00000360121 | -0,579176085 |
| A_23_P54636   | NM_004691        | ATP6V0D1       | ATPase, H <sup>+</sup> transporting, lysosomal 38kDa, V0 subunit d1 | ENST00000290949 | -0,579305048 |
| A_23_P60387   | NM_017617        | NOTCH1         | notch 1                                                             | ENST00000277541 | -0,579470948 |
| A_23_P151294  | NM_000619        | IFNG           | interferon, gamma                                                   | ENST00000229135 | -0,579612971 |
| A_33_P3271594 | NM_032546        | TRIM54         | tripartite motif containing 54                                      | ENST00000380075 | -0,579656182 |



|                |                |              |                                                              |                 |              |
|----------------|----------------|--------------|--------------------------------------------------------------|-----------------|--------------|
| A_33_P3383233  | NM_201535      | NDRG2        | NDRG family member 2                                         | ENST00000397847 | -0,579665275 |
| A_33_P3222937  | NM_017727      | TMEM214      | transmembrane protein 214                                    | ENST00000404032 | -0,579691177 |
| A_23_P37910    | NM_002746      | MAPK3        | mitogen-activated protein kinase 3                           | ENST00000395202 | -0,579979154 |
| A_23_P103877   | NM_001010847   | LRRC38       | leucine rich repeat containing 38                            | ENST00000376085 | -0,580131137 |
| A_21_P0002582  | TCONS_00003614 | XLOC_001406  |                                                              |                 | -0,580133862 |
| A_21_P0009844  | XR_109613      | LOC100130157 | uncharacterized LOC100130157                                 | ENST00000424705 | -0,580326775 |
| A_23_P108437   | NM_003468      | FZD5         | frizzled family receptor 5                                   | ENST00000295417 | -0,580349087 |
| A_23_P217737   | NM_000052      | ATP7A        | ATPase, Cu <sup>++</sup> transporting, alpha polypeptide     | ENST00000341514 | -0,580358681 |
| A_23_P118254   | NM_001451      | FOXF1        | forkhead box F1                                              | ENST00000262426 | -0,580640958 |
| A_23_P26325    | NM_002987      | CCL17        | chemokine (C-C motif) ligand 17                              | ENST00000219244 | -0,580669965 |
| A_33_P3270009  | NM_147223      | NCOA1        | nuclear receptor coactivator 1                               | ENST00000405141 | -0,58072853  |
| A_21_P0000607  | NR_033839      | FLJ39051     | uncharacterized LOC399972                                    |                 | -0,580736576 |
| A_24_P417162   | NM_005647      | TBL1X        | transducin (beta)-like 1X-linked                             | ENST00000217964 | -0,580774698 |
| A_19_P00320570 | TCONS_00010154 | XLOC_004620  |                                                              |                 | -0,580798206 |
| A_21_P0000558  | NR_028308      | LOC100302650 | uncharacterized LOC100302650                                 |                 | -0,580803967 |
| A_24_P294703   | NM_130809      | PRRC1        | proline-rich coiled-coil 1                                   | ENST00000512635 | -0,581139258 |
| A_23_P130919   | NM_130807      | MOB3A        | MOB kinase activator 3A                                      | ENST00000357066 | -0,581157859 |
| A_23_P207879   | NM_024110      | CARD14       | caspase recruitment domain family, member 14                 | ENST00000344227 | -0,58125051  |
| A_21_P0002569  | TCONS_00004684 | XLOC_001329  |                                                              |                 | -0,58149314  |
| A_23_P12082    | NM_001025199   | CHI3L2       | chitinase 3-like 2                                           | ENST00000369748 | -0,581895862 |
| A_23_P8055     | NM_007243      | NRM          | nurim (nuclear envelope membrane protein)                    | ENST00000376421 | -0,581899881 |
| A_33_P3209866  | NM_153186      | KANK1        | KN motif and ankyrin repeat domains 1                        | ENST00000382289 | -0,581918093 |
| A_23_P140256   | NM_000270      | PNP          | purine nucleoside phosphorylase                              | ENST00000554056 | -0,582012298 |
| A_23_P92499    | NM_003264      | TLR2         | toll-like receptor 2                                         | ENST00000260010 | -0,582081839 |
| A_23_P112531   | NM_001035254   | FAM102A      | family with sequence similarity 102, member A                | ENST00000300434 | -0,582151689 |
| A_33_P3409159  | NM_015482      | SLC22A23     | solute carrier family 22, member 23                          | ENST00000406686 | -0,582435753 |
| A_23_P54488    | NM_015162      | ACSBG1       | acyl-CoA synthetase bubblegum family member 1                | ENST00000541759 | -0,582558361 |
| A_23_P11397    | NR_001537      | TTY13        | testis-specific transcript, Y-linked 13 (non-protein coding) | ENST00000330337 | -0,582683994 |
| A_23_P131846   | NM_005985      | SNAI1        | snail homolog 1 (Drosophila)                                 | ENST00000244050 | -0,582693597 |



|                |                 |              |                                                                   |                 |              |
|----------------|-----------------|--------------|-------------------------------------------------------------------|-----------------|--------------|
| A_23_P92499    | NM_003264       | TLR2         | toll-like receptor 2                                              | ENST00000260010 | -0,58292135  |
| A_23_P314070   | NM_004308       | ARHGAP1      | Rho GTPase activating protein 1                                   | ENST00000311956 | -0,583053156 |
| A_32_P89352    | NM_080676       | MACROD2      | MACRO domain containing 2                                         | ENST00000217246 | -0,583084092 |
| A_21_P0003983  | ENST00000511054 | XLOC_004331  |                                                                   | ENST00000511054 | -0,583121117 |
| A_32_P219116   | NM_018451       | CENPJ        | centromere protein J                                              | ENST00000445729 | -0,5832161   |
| A_23_P70213    | NM_000038       | APC          | adenomatous polyposis coli                                        | ENST00000508376 | -0,583411695 |
| A_33_P3224745  | NM_012320       | PLA2G15      | phospholipase A2, group XV                                        | ENST00000219345 | -0,583479915 |
| A_21_P0002423  | TCONS_00004212  | XLOC_002054  |                                                                   |                 | -0,583514773 |
| A_21_P0014400  | XR_109612       | LOC100128997 | uncharacterized LOC100128997                                      |                 | -0,583527264 |
| A_33_P3235611  | NM_080669       | SLC46A1      | solute carrier family 46 (folate transporter), member 1           | ENST00000440501 | -0,583720791 |
| A_23_P122508   | NM_080870       | DPCR1        | diffuse panbronchiolitis critical region 1                        | ENST00000414703 | -0,583727201 |
| A_33_P3248265  | NM_002341       | LTB          | lymphotoxin beta (TNF superfamily, member 3)                      | ENST00000376117 | -0,583832606 |
| A_19_P00811460 | NM_001031746    | VSTM4        |                                                                   |                 | -0,583871562 |
| A_24_P243741   | NM_021721       | ADAM22       | ADAM metallopeptidase domain 22                                   | ENST00000398201 | -0,583925836 |
| A_21_P0010863  | NR_026795       | LINC00202    | long intergenic non-protein coding RNA 202                        | ENST00000431296 | -0,58394612  |
| A_23_P207766   | NM_004309       | ARHGDI1      | Rho GDP dissociation inhibitor (GDI) alpha                        | ENST00000400721 | -0,583978912 |
| A_23_P157404   | NM_001283       | AP1S1        | adaptor-related protein complex 1, sigma 1 subunit                | ENST00000337619 | -0,584010813 |
| A_33_P3344477  | NM_001134999    | FERMT2       | fermitin family member 2                                          | ENST00000343279 | -0,584019677 |
| A_23_P46539    | NM_032636       | PSRC1        | proline/serine-rich coiled-coil 1                                 | ENST00000369903 | -0,584111291 |
| A_33_P3286859  | NM_016529       | ATP8A2       | ATPase, aminophospholipid transporter, class I, type 8A, membrane | ENST00000255283 | -0,584157169 |
| A_23_P92499    | NM_003264       | TLR2         | toll-like receptor 2                                              | ENST00000260010 | -0,584209463 |
| A_23_P118536   | NM_018042       | SLFN12       | schlafen family member 12                                         | ENST00000479326 | -0,584461849 |
| A_33_P3279629  | NM_033199       | UCN2         | urocortin 2                                                       | ENST00000273610 | -0,584720705 |
| A_24_P276490   | NM_007260       | LYPLA2       | lysophospholipase II                                              | ENST00000420982 | -0,58479058  |
| A_24_P62505    | NM_015101       | GLT25D2      | glycosyltransferase 25 domain containing 2                        | ENST00000361927 | -0,584874561 |
| A_23_P118536   | NM_018042       | SLFN12       | schlafen family member 12                                         | ENST00000479326 | -0,585034079 |
| A_23_P117582   | NM_130469       | JDP2         | Jun dimerization protein 2                                        | ENST00000435893 | -0,585156011 |
| A_21_P0004755  | ENST00000420819 | XLOC_005747  |                                                                   | ENST00000420819 | -0,58526079  |
| A_33_P3397763  | NM_003811       | TNFSF9       | tumor necrosis factor (ligand) superfamily, member 9              | ENST00000245817 | -0,585631693 |

|                |                 |             |                                                              |                 |              |
|----------------|-----------------|-------------|--------------------------------------------------------------|-----------------|--------------|
| A_23_P503182   | NM_021962       | ABR         | active BCR-related gene                                      | ENST00000291107 | -0,585680546 |
| A_23_P203540   | NM_012153       | EHF         | ets homologous factor                                        | ENST00000257831 | -0,585778937 |
| A_32_P112279   | NM_001039690    | CTHF8       | CTF8, chromosome transmission fidelity factor 8 homolog (    | ENST00000306585 | -0,585802966 |
| A_33_P3369034  | NM_001170714    | BCAR1       | breast cancer anti-estrogen resistance 1                     | ENST00000546196 | -0,585993099 |
| A_33_P3413987  | NM_000062       | SERPING1    | serpin peptidase inhibitor, clade G (C1 inhibitor), member 1 | ENST00000278407 | -0,586414582 |
| A_23_P254271   | NM_032525       | TUBB6       | tubulin, beta 6 class V                                      | ENST00000417736 | -0,586571876 |
| A_23_P10025    | NM_006159       | NELL2       | NEL-like 2 (chicken)                                         | ENST00000437801 | -0,586699477 |
| A_23_P54649    | NM_003789       | TRADD       | TNFRSF1A-associated via death domain                         | ENST00000486556 | -0,586807209 |
| A_23_P362183   | NM_173551       | ANKS6       | ankyrin repeat and sterile alpha motif domain containing 6   | ENST00000540940 | -0,587193971 |
| A_23_P303423   | NM_020846       | SLAIN2      | SLAIN motif family, member 2                                 | ENST00000264313 | -0,58749278  |
| A_19_P00801585 | THC2612479      | Q982T4      |                                                              |                 | -0,58750487  |
| A_23_P101246   | NM_001163922    | VSIG10L     | V-set and immunoglobulin domain containing 10 like           | ENST00000335624 | -0,587618891 |
| A_23_P116557   | NM_009587       | LGALS9      | lectin, galactoside-binding, soluble, 9                      | ENST00000467111 | -0,587723898 |
| A_33_P3409139  | NR_015409       | LOC143188   | uncharacterized LOC143188                                    |                 | -0,587748241 |
| A_23_P111724   | NM_138290       | RUNDC3B     | RUN domain containing 3B                                     | ENST00000493037 | -0,587846326 |
| A_23_P117782   | NM_018357       | LARP6       | La ribonucleoprotein domain family, member 6                 | ENST00000299213 | -0,588027005 |
| A_21_P0006726  | ENST00000418372 | XLOC_008700 |                                                              | ENST00000418372 | -0,588247164 |
| A_33_P3269803  | NM_014718       | CLSTN3      | calsyntenin 3                                                | ENST00000331148 | -0,588263894 |
| A_23_P62634    | NM_020485       | RHCE        | Rh blood group, CcEe antigens                                | ENST00000349438 | -0,588270752 |
| A_33_P3399150  | ENST00000542515 | ORAOV1      | oral cancer overexpressed 1                                  | ENST00000542515 | -0,588448448 |
| A_21_P0004779  | ENST00000417932 | XLOC_005851 |                                                              | ENST00000417932 | -0,588553499 |
| A_23_P16189    | NM_002739       | PRKCG       | protein kinase C, gamma                                      | ENST00000540413 | -0,588757954 |
| A_23_P37702    | NM_003294       | TPSAB1      | tryptase alpha/beta 1                                        | ENST00000445910 | -0,58882683  |
| A_24_P376129   | ENST00000374057 | DFNB31      | deafness, autosomal recessive 31                             | ENST00000374057 | -0,588872365 |
| A_23_P337800   | NM_172140       | IL29        | interleukin 29 (interferon, lambda 1)                        | ENST00000333625 | -0,589138551 |
| A_23_P166248   | NM_004414       | RCAN1       | regulator of calcineurin 1                                   | ENST00000443408 | -0,589223622 |
| A_24_P98161    | NM_194455       | KRIT1       | KRIT1, ankyrin repeat containing                             | ENST00000394507 | -0,58929018  |
| A_23_P103486   | NM_000775       | CYP2J2      | cytochrome P450, family 2, subfamily J, polypeptide 2        | ENST00000469406 | -0,589304026 |
| A_23_P100704   | NM_139033       | MAPK7       | mitogen-activated protein kinase 7                           | ENST00000308406 | -0,589479978 |

|                |                 |             |                                                             |                 |              |
|----------------|-----------------|-------------|-------------------------------------------------------------|-----------------|--------------|
| A_23_P139722   | NM_001065       | TNFRSF1A    | tumor necrosis factor receptor superfamily, member 1A       | ENST00000504738 | -0,589484305 |
| A_23_P36624    | NM_023919       | TAS2R7      | taste receptor, type 2, member 7                            | ENST00000240687 | -0,58958769  |
| A_19_P00316602 | NR_015364       | LOC441204   | uncharacterized LOC441204                                   |                 | -0,589618262 |
| A_23_P112531   | NM_001035254    | FAM102A     | family with sequence similarity 102, member A               | ENST00000300434 | -0,589632995 |
| A_23_P14302    | NR_026779       | LINC00341   | long intergenic non-protein coding RNA 341                  |                 | -0,589704154 |
| A_23_P46356    | NM_024575       | TNFAIP8L2   | tumor necrosis factor, alpha-induced protein 8-like 2       | ENST00000368910 | -0,589770164 |
| A_23_P117582   | NM_130469       | JDP2        | Jun dimerization protein 2                                  | ENST00000435893 | -0,589953325 |
| A_24_P921366   | NM_033138       | CALD1       | caldesmon 1                                                 | ENST00000443197 | -0,590007064 |
| A_21_P0014220  | ENST00000518392 | CA13        | carbonic anhydrase XIII                                     | ENST00000518392 | -0,590262378 |
| A_21_P0005421  | TCONS_00013572  | XLOC_006223 |                                                             |                 | -0,590312321 |
| A_24_P144784   | NR_024193       | HILS1       | histone linker H1 domain, spermatid-specific 1              | ENST00000504307 | -0,590345703 |
| A_23_P501822   | NM_002230       | JUP         | junction plakoglobin                                        | ENST00000393931 | -0,590764695 |
| A_33_P3217465  | NM_021242       | MID1IP1     | MID1 interacting protein 1 (gastrulation specific G12 homol | ENST00000378474 | -0,590836645 |
| A_23_P139722   | NM_001065       | TNFRSF1A    | tumor necrosis factor receptor superfamily, member 1A       | ENST00000504738 | -0,590908644 |
| A_23_P360302   | NM_001522       | GUCY2F      | guanylate cyclase 2F, retinal                               | ENST00000218006 | -0,590948671 |
| A_23_P100189   | NM_002761       | PRM1        | protamine 1                                                 | ENST00000312511 | -0,590961968 |
| A_23_P92499    | NM_003264       | TLR2        | toll-like receptor 2                                        | ENST00000260010 | -0,591099919 |
| A_24_P388433   | NM_002718       | PPP2R3A     | protein phosphatase 2, regulatory subunit B'', alpha        | ENST00000264977 | -0,591538204 |
| A_23_P129246   | NM_025201       | PLEKHO2     | pleckstrin homology domain containing, family O member 2    | ENST00000546008 | -0,591866199 |
| A_33_P3363560  | NM_001136216    | TMEM51      | transmembrane protein 51                                    | ENST00000376014 | -0,591939902 |
| A_23_P215634   | NM_001013398    | IGFBP3      | insulin-like growth factor binding protein 3                | ENST00000438491 | -0,591952602 |
| A_23_P309973   | NM_172365       | PPP1R36     | protein phosphatase 1, regulatory subunit 36                | ENST00000467261 | -0,59195604  |
| A_23_P117582   | NM_130469       | JDP2        | Jun dimerization protein 2                                  | ENST00000435893 | -0,59197493  |
| A_23_P331895   | NM_025250       | TTYH3       | tweety homolog 3 (Drosophila)                               | ENST00000407643 | -0,591982411 |
| A_23_P54055    | NM_032876       | AJUBA       | ajuba LIM protein                                           | ENST00000361265 | -0,592067036 |
| A_33_P3809497  | NR_033987       | FLJ37505    | uncharacterized LOC400087                                   |                 | -0,592153192 |
| A_23_P52373    | NM_003635       | NDST2       | N-deacetylase/N-sulfotransferase (heparan glucosaminyl) 2   | ENST00000299641 | -0,592213938 |
| A_33_P3783812  | AK022255        | C8orf60     | chromosome 8 open reading frame 60                          |                 | -0,592289727 |
| A_23_P118741   | NM_201566       | SLC16A13    | solute carrier family 16, member 13 (monocarboxylic acid tr | ENST00000308027 | -0,592298833 |

|               |                 |             |                                                              |                 |              |
|---------------|-----------------|-------------|--------------------------------------------------------------|-----------------|--------------|
| A_23_P254888  | NM_003461       | ZYX         | zyxin                                                        | ENST00000449423 | -0,592369363 |
| A_21_P0004268 | TCONS_00010003  | XLOC_004439 |                                                              |                 | -0,592507235 |
| A_24_P253827  | NM_001030006    | AP2B1       | adaptor-related protein complex 2, beta 1 subunit            | ENST00000312678 | -0,592529326 |
| A_21_P0011342 | AK127420        | LOC400464   | uncharacterized LOC400464                                    |                 | -0,592582016 |
| A_23_P121596  | NM_002704       | PPBP        | pro-platelet basic protein (chemokine (C-X-C motif) ligand 7 | ENST00000296028 | -0,592748515 |
| A_23_P122116  | NM_016222       | DDX41       | DEAD (Asp-Glu-Ala-Asp) box polypeptide 41                    | ENST00000507900 | -0,592832842 |
| A_23_P42882   | NM_172082       | CAMK2B      | calcium/calmodulin-dependent protein kinase II beta          | ENST00000395747 | -0,592874205 |
| A_24_P16124   | NR_001590       | IFITM4P     | interferon induced transmembrane protein 4 pseudogene        |                 | -0,593095613 |
| A_23_P24332   | NM_145650       | MUC15       | mucin 15, cell surface associated                            | ENST00000527569 | -0,593200003 |
| A_21_P0002730 | ENST00000425195 | XLOC_002603 |                                                              | ENST00000425195 | -0,593212964 |
| A_23_P142750  | NM_002759       | EIF2AK2     | eukaryotic translation initiation factor 2-alpha kinase 2    | ENST00000395127 | -0,593416588 |
| A_23_P369815  | NM_000639       | FASLG       | Fas ligand (TNF superfamily, member 6)                       | ENST00000367721 | -0,593492176 |
| A_23_P113471  | NM_174912       | FAAH2       | fatty acid amide hydrolase 2                                 | ENST00000491179 | -0,593534525 |
| A_23_P389102  | NM_015194       | MYO1D       | myosin ID                                                    | ENST00000318217 | -0,593606699 |
| A_21_P0006994 | TCONS_00018506  | XLOC_008814 |                                                              |                 | -0,593644584 |
| A_23_P151294  | NM_000619       | IFNG        | interferon, gamma                                            | ENST00000229135 | -0,593799439 |
| A_23_P100189  | NM_002761       | PRM1        | protamine 1                                                  | ENST00000312511 | -0,593837796 |
| A_23_P105066  | NM_001014795    | ILK         | integrin-linked kinase                                       | ENST00000527394 | -0,593920608 |
| A_33_P3709173 | NM_001127360    | PHTF2       | putative homeodomain transcription factor 2                  | ENST00000415251 | -0,593951424 |
| A_33_P3360917 | NM_018085       | IPO9        | importin 9                                                   | ENST00000361565 | -0,594037642 |
| A_23_P331479  | NM_133471       | PPP1R18     | protein phosphatase 1, regulatory subunit 18                 | ENST00000274853 | -0,59425901  |
| A_23_P70213   | NM_000038       | APC         | adenomatous polyposis coli                                   | ENST00000508376 | -0,59440528  |
| A_23_P139722  | NM_001065       | TNFRSF1A    | tumor necrosis factor receptor superfamily, member 1A        | ENST00000504738 | -0,594447024 |
| A_23_P120931  | NM_014508       | APOBEC3C    | apolipoprotein B mRNA editing enzyme, catalytic polypeptide  | ENST00000361441 | -0,594538588 |
| A_23_P133956  | NM_002263       | KIFC1       | kinesin family member C1                                     | ENST00000480346 | -0,594576571 |
| A_23_P121480  | NM_001004196    | CD200       | CD200 molecule                                               | ENST00000478595 | -0,594784011 |
| A_23_P112531  | NM_001035254    | FAM102A     | family with sequence similarity 102, member A                | ENST00000300434 | -0,594861801 |
| A_21_P0003190 | TCONS_00006708  | XLOC_003327 |                                                              |                 | -0,594965736 |
| A_23_P28263   | NM_021198       | CTDSP1      | CTD (carboxy-terminal domain, RNA polymerase II, polypeptide | ENST00000273062 | -0,595184976 |

|               |                                 |              |                                                            |                 |              |
|---------------|---------------------------------|--------------|------------------------------------------------------------|-----------------|--------------|
| A_23_P145724  | NM_006658                       | PPP1R17      | protein phosphatase 1, regulatory subunit 17               | ENST00000342032 | -0,595202019 |
| A_33_P3293403 | NM_001099279                    | FOXD4L2      | forkhead box D4-like 2                                     | ENST00000377413 | -0,595521967 |
| A_21_P0012192 | TCONS_I2_0001717;XLOC_I2_009172 |              |                                                            |                 | -0,595523829 |
| A_23_P207106  | NM_000747                       | CHRNB1       | cholinergic receptor, nicotinic, beta 1 (muscle)           | ENST00000306071 | -0,595932148 |
| A_23_P147665  | NM_198474                       | OLFML1       | olfactomedin-like 1                                        | ENST00000329293 | -0,595972792 |
| A_21_P0014426 | NR_040535                       | LOC100506472 | uncharacterized LOC100506472                               |                 | -0,596199714 |
| A_23_P112531  | NM_001035254                    | FAM102A      | family with sequence similarity 102, member A              | ENST00000300434 | -0,596433025 |
| A_23_P122077  | NM_016591                       | GCNT4        | glucosaminyl (N-acetyl) transferase 4, core 2              | ENST00000322348 | -0,596615891 |
| A_23_P117582  | NM_130469                       | JDP2         | Jun dimerization protein 2                                 | ENST00000435893 | -0,596814424 |
| A_23_P210538  | NM_182764                       | ELMO2        | engulfment and cell motility 2                             | ENST00000352077 | -0,596886726 |
| A_23_P421401  | NM_002609                       | PDGFRB       | platelet-derived growth factor receptor, beta polypeptide  | ENST00000544453 | -0,596943655 |
| A_23_P37910   | NM_002746                       | MAPK3        | mitogen-activated protein kinase 3                         | ENST00000395202 | -0,596990367 |
| A_23_P37988   | NM_152727                       | CPNE2        | copine II                                                  | ENST00000535318 | -0,597192918 |
| A_24_P759477  | NM_002214                       | ITGB8        | integrin, beta 8                                           |                 | -0,597389391 |
| A_24_P784765  | NM_203330                       | CD59         | CD59 molecule, complement regulatory protein               |                 | -0,597416452 |
| A_33_P3378212 | NM_030973                       | MED25        | mediator complex subunit 25                                | ENST00000312881 | -0,597461888 |
| A_24_P245838  | NM_002409                       | MGAT3        | mannosyl (beta-1,4-)-glycoprotein beta-1,4-N-acetylglucosa | ENST00000341184 | -0,597511493 |
| A_23_P122052  | NM_001008397                    | GPX8         | glutathione peroxidase 8 (putative)                        | ENST00000503787 | -0,597692101 |
| A_23_P12082   | NM_001025199                    | CHI3L2       | chitinase 3-like 2                                         | ENST00000369748 | -0,597757671 |
| A_23_P12554   | NM_016112                       | PKD2L1       | polycystic kidney disease 2-like 1                         | ENST00000318222 | -0,597980902 |
| A_32_P526255  | NM_001145717                    | PNPLA1       | patatin-like phospholipase domain containing 1             | ENST00000457797 | -0,598036616 |
| A_33_P3413741 | NM_000916                       | OXTR         | oxytocin receptor                                          | ENST00000316793 | -0,598074679 |
| A_23_P126167  | NM_002249                       | KCNN3        | potassium intermediate/small conductance calcium-activated | ENST00000358505 | -0,598076099 |
| A_21_P0007228 | TCONS_00019367                  | XLOC_009190  |                                                            |                 | -0,598090009 |
| A_23_P92499   | NM_003264                       | TLR2         | toll-like receptor 2                                       | ENST00000260010 | -0,598140536 |
| A_23_P215461  | NM_002314                       | LIMK1        | LIM domain kinase 1                                        | ENST00000336180 | -0,59817566  |
| A_23_P422193  | NM_003173                       | SUV39H1      | suppressor of variegation 3-9 homolog 1 (Drosophila)       | ENST00000448548 | -0,598205217 |
| A_24_P14464   | NM_006103                       | WFDC2        | WAP four-disulfide core domain 2                           | ENST00000372676 | -0,598254647 |
| A_21_P0012205 | TCONS_I2_0001723;XLOC_I2_009219 |              |                                                            |                 | -0,598322388 |



|               |                |              |                                                            |                 |              |
|---------------|----------------|--------------|------------------------------------------------------------|-----------------|--------------|
| A_23_P210886  | NM_138578      | BCL2L1       | BCL2-like 1                                                | ENST00000420653 | -0,598328139 |
| A_23_P150394  | NM_022003      | FXYP6        | FXYP domain containing ion transport regulator 6           | ENST00000526014 | -0,598341263 |
| A_23_P35343   | NM_021045      | ZNF248       | zinc finger protein 248                                    | ENST00000494133 | -0,598553953 |
| A_24_P404245  | NM_002861      | PCYT2        | phosphate cytidyltransferase 2, ethanolamine               | ENST00000331285 | -0,598595328 |
| A_33_P3253304 | NR_026754      | LOC100270710 | uncharacterized LOC100270710                               |                 | -0,59864784  |
| A_23_P123172  | NR_002157      | OR2A9P       | olfactory receptor, family 2, subfamily A, member 9 pseudo | ENST00000461471 | -0,59864823  |
| A_23_P122863  | NM_001001555   | GRB10        | growth factor receptor-bound protein 10                    | ENST00000402497 | -0,598780089 |
| A_23_P103877  | NM_001010847   | LRRC38       | leucine rich repeat containing 38                          | ENST00000376085 | -0,599105178 |
| A_23_P89310   | NM_014964      | EPN2         | epsin 2                                                    | ENST00000314728 | -0,599207212 |
| A_23_P139722  | NM_001065      | TNFRSF1A     | tumor necrosis factor receptor superfamily, member 1A      | ENST00000504738 | -0,599477411 |
| A_33_P3304678 | NR_015406      | LOC149837    | uncharacterized LOC149837                                  |                 | -0,599563143 |
| A_21_P0005210 | XR_110640      | LOC100505904 | uncharacterized LOC100505904                               | ENST00000447039 | -0,599614036 |
| A_23_P65386   | NM_023112      | OTUB2        | OTU domain, ubiquitin aldehyde binding 2                   | ENST00000203664 | -0,599716488 |
| A_23_P114883  | NM_002023      | FMOD         | fibromodulin                                               | ENST00000354955 | -0,599761881 |
| A_23_P387630  | NM_014725      | STARD8       | StAR-related lipid transfer (START) domain containing 8    | ENST00000374597 | -0,599916492 |
| A_23_P7582    | NM_003202      | TCF7         | transcription factor 7 (T-cell specific, HMG-box)          | ENST00000522653 | -0,600126023 |
| A_33_P3246763 | NM_001166579   | AANAT        | aralkylamine N-acetyltransferase                           | ENST00000250615 | -0,600355567 |
| A_33_P3408152 | NM_021076      | NEFH         | neurofilament, heavy polypeptide                           | ENST00000328842 | -0,600410956 |
| A_33_P3333554 | BX640643       | ACTR3C       | ARP3 actin-related protein 3 homolog C (yeast)             | ENST00000478393 | -0,600470448 |
| A_21_P0004547 | TCONS_00010856 | XLOC_004673  |                                                            |                 | -0,600496533 |
| A_23_P105691  | NM_018654      | GPRC5D       | G protein-coupled receptor, family C, group 5, member D    | ENST00000396333 | -0,600638663 |
| A_23_P57667   | NM_032242      | PLXNA1       | plexin A1                                                  | ENST00000251772 | -0,600683518 |
| A_23_P7582    | NM_003202      | TCF7         | transcription factor 7 (T-cell specific, HMG-box)          | ENST00000522653 | -0,600942507 |
| A_23_P92499   | NM_003264      | TLR2         | toll-like receptor 2                                       | ENST00000260010 | -0,601077045 |
| A_23_P73429   | NM_005335      | HCLS1        | hematopoietic cell-specific Lyn substrate 1                | ENST00000473883 | -0,601079819 |
| A_23_P34788   | NM_006845      | KIF2C        | kinesin family member 2C                                   | ENST00000372218 | -0,601250476 |
| A_23_P154208  | NM_017567      | NAGK         | N-acetylglucosamine kinase                                 | ENST00000455197 | -0,601383932 |
| A_32_P902957  | NM_138450      | ARL11        | ADP-ribosylation factor-like 11                            | ENST00000282026 | -0,601387418 |
| A_24_P410797  | AK125979       | KALRN        | kalirin, RhoGEF kinase                                     | ENST00000393496 | -0,601540852 |



|               |                |                |                                                                 |                 |              |
|---------------|----------------|----------------|-----------------------------------------------------------------|-----------------|--------------|
| A_33_P3295458 | NR_024355      | BK250D10.8     | uncharacterized LOC339674                                       |                 | -0,601748701 |
| A_23_P92499   | NM_003264      | TLR2           | toll-like receptor 2                                            | ENST00000260010 | -0,601878817 |
| A_23_P98571   | NM_145017      | PPP1R32        | protein phosphatase 1, regulatory subunit 32                    | ENST00000432063 | -0,602031181 |
| A_23_P203475  | NM_145040      | PRKCDBP        | protein kinase C, delta binding protein                         | ENST00000303927 | -0,602076493 |
| A_21_P0000005 | NM_001105565   | SMTNL1         | smoothelin-like 1                                               | ENST00000457912 | -0,602154956 |
| A_21_P0001776 | BC036617       | XLOC_001558    |                                                                 |                 | -0,602337807 |
| A_24_P346855  | NM_002417      | MKI67          | antigen identified by monoclonal antibody Ki-67                 | ENST00000537609 | -0,60257809  |
| A_23_P216766  | NM_030940      | ISCA1          | iron-sulfur cluster assembly 1 homolog ( <i>S. cerevisiae</i> ) | ENST00000375991 | -0,602734992 |
| A_23_P120845  | NM_005080      | XBP1           | X-box binding protein 1                                         | ENST00000415306 | -0,602750298 |
| A_33_P3236177 | NM_001145      | ANG            | angiogenin, ribonuclease, RNase A family, 5                     | ENST00000336811 | -0,602803369 |
| A_24_P376309  | NM_032595      | PPP1R9B        | protein phosphatase 1, regulatory subunit 9B                    | ENST00000501501 | -0,60295801  |
| A_23_P369815  | NM_000639      | FASLG          | Fas ligand (TNF superfamily, member 6)                          | ENST00000367721 | -0,602961928 |
| A_24_P295963  | NM_018976      | SLC38A2        | solute carrier family 38, member 2                              | ENST00000549258 | -0,602992274 |
| A_23_P125265  | NM_002266      | KPNA2          | karyopherin alpha 2 (RAG cohort 1, importin alpha 1)            | ENST00000537025 | -0,603061154 |
| A_24_P408457  | NM_000262      | NAGA           | N-acetylgalactosaminidase, alpha-                               | ENST00000396398 | -0,603328472 |
| A_23_P411612  | NM_207344      | SPRYD4         | SPRY domain containing 4                                        | ENST00000338146 | -0,603373124 |
| A_33_P3242234 | NM_001007523   | F8A2           | coagulation factor VIII-associated 2                            | ENST00000369445 | -0,603402779 |
| A_23_P331049  | NM_006426      | DPYSL4         | dihydropyrimidinase-like 4                                      | ENST00000338492 | -0,603467914 |
| A_23_P92499   | NM_003264      | TLR2           | toll-like receptor 2                                            | ENST00000260010 | -0,603485952 |
| A_23_P75220   | NM_031212      | SLC25A28       | solute carrier family 25, member 28                             | ENST00000491157 | -0,60377132  |
| A_24_P42693   | NM_021187      | CYP4F11        | cytochrome P450, family 4, subfamily F, polypeptide 11          | ENST00000326742 | -0,603976308 |
| A_33_P3283780 | NM_015898      | ZBTB7A         | zinc finger and BTB domain containing 7A                        | ENST00000322357 | -0,604132536 |
| A_32_P54503   | NR_024451      | LOC100134229   | uncharacterized LOC100134229                                    |                 | -0,604177492 |
| A_24_P349965  | NM_007109      | TCF19          | transcription factor 19                                         | ENST00000400401 | -0,604181114 |
| A_21_P0012945 | BG214557       | XLOC_l2_011627 |                                                                 |                 | -0,604220479 |
| A_24_P23995   | NM_001010858   | RNF187         | ring finger protein 187                                         | ENST00000463833 | -0,604364757 |
| A_23_P121596  | NM_002704      | PPBP           | pro-platelet basic protein (chemokine (C-X-C motif) ligand 7    | ENST00000296028 | -0,604797469 |
| A_23_P108437  | NM_003468      | FZD5           | frizzled family receptor 5                                      | ENST00000295417 | -0,604869079 |
| A_21_P0010465 | TCONS_00029809 | XLOC_014244    |                                                                 |                 | -0,604892443 |

|                |                                  |              |                                                                     |                 |              |
|----------------|----------------------------------|--------------|---------------------------------------------------------------------|-----------------|--------------|
| A_23_P60387    | NM_017617                        | NOTCH1       | notch 1                                                             | ENST00000277541 | -0,604894941 |
| A_23_P212475   | NM_016479                        | SHISA5       | shisa homolog 5 ( <i>Xenopus laevis</i> )                           | ENST00000417962 | -0,605096892 |
| A_23_P117582   | NM_130469                        | JDP2         | Jun dimerization protein 2                                          | ENST00000435893 | -0,60596426  |
| A_23_P134454   | NM_001753                        | CAV1         | caveolin 1, caveolae protein, 22kDa                                 | ENST00000341049 | -0,60604615  |
| A_24_P203000   | NM_000878                        | IL2RB        | interleukin 2 receptor, beta                                        | ENST00000216223 | -0,606187518 |
| A_33_P3420235  | ENST00000367534                  | ARPC5        | actin related protein 2/3 complex, subunit 5, 16kDa                 | ENST00000367534 | -0,606356708 |
| A_23_P151294   | NM_000619                        | IFNG         | interferon, gamma                                                   | ENST00000229135 | -0,606571771 |
| A_23_P117782   | NM_018357                        | LARP6        | La ribonucleoprotein domain family, member 6                        | ENST00000299213 | -0,606642089 |
| A_24_P938614   | NM_001263                        | CDS1         | CDP-diacylglycerol synthase (phosphatidate cytidyltransferase)      | ENST00000295887 | -0,606715421 |
| A_23_P257971   | NM_001353                        | AKR1C1       | aldo-keto reductase family 1, member C1 (dihydrodiol dehydrogenase) | ENST00000460124 | -0,606853279 |
| A_23_P425752   | NM_033219                        | TRIM14       | tripartite motif containing 14                                      | ENST00000342043 | -0,606950379 |
| A_33_P3331767  | NM_024034                        | GDAP1L1      | ganglioside-induced differentiation-associated protein 1-like 1     | ENST00000372952 | -0,606996449 |
| A_33_P3366019  | NR_024481                        | FAM205B      | transmembrane protein C9orf144B pseudogene                          | ENST00000399773 | -0,607071319 |
| A_23_P75741    | NM_198183                        | UBE2L6       | ubiquitin-conjugating enzyme E2L 6                                  | ENST00000528275 | -0,607079652 |
| A_21_P0013602  | TCONS_I2_0002908; XLOC_I2_015038 |              |                                                                     |                 | -0,607117134 |
| A_23_P117582   | NM_130469                        | JDP2         | Jun dimerization protein 2                                          | ENST00000435893 | -0,607138466 |
| A_23_P120694   | NM_172201                        | KCNE2        | potassium voltage-gated channel, Isk-related family, member 2       | ENST00000290310 | -0,607190751 |
| A_23_P344884   | NM_001166222                     | CARNS1       | carnosine synthase 1                                                | ENST00000531958 | -0,607251538 |
| A_33_P3479449  | AK055877                         | LOC100506328 | uncharacterized LOC100506328                                        |                 | -0,607257511 |
| A_23_P118536   | NM_018042                        | SLFN12       | schlafen family member 12                                           | ENST00000479326 | -0,607263263 |
| A_23_P152782   | NM_005533                        | IFI35        | interferon-induced protein 35                                       | ENST00000538473 | -0,607364412 |
| A_33_P3269539  | NM_058174                        | COL6A2       | collagen, type VI, alpha 2                                          | ENST00000357838 | -0,607378788 |
| A_19_P00326179 | NR_033354                        | ZNF519       |                                                                     |                 | -0,607469323 |
| A_23_P217109   | NM_001860                        | SLC31A2      | solute carrier family 31 (copper transporters), member 2            | ENST00000259392 | -0,607779948 |
| A_33_P3254801  | NM_007346                        | OGFR         | opioid growth factor receptor                                       | ENST00000370461 | -0,607844676 |
| A_23_P99661    | NM_018071                        | ARHGEF40     | Rho guanine nucleotide exchange factor (GEF) 40                     | ENST00000553709 | -0,60787538  |
| A_33_P3300217  | NM_182493                        | MYLK3        | myosin light chain kinase 3                                         |                 | -0,607915783 |
| A_23_P250274   | NM_019594                        | LRRRC8A      | leucine rich repeat containing 8 family, member A                   | ENST00000259324 | -0,608117377 |
| A_21_P0009782  | BX118437                         | XLOC_012984  |                                                                     |                 | -0,608152826 |

|                |                  |                |                                                                 |                 |              |
|----------------|------------------|----------------|-----------------------------------------------------------------|-----------------|--------------|
| A_19_P00321206 | ENST00000440326  | XLOC_001826    |                                                                 | ENST00000440326 | -0,608594217 |
| A_23_P55319    | NM_004475        | FLOT2          | flotillin 2                                                     | ENST00000394906 | -0,608594275 |
| A_23_P108437   | NM_003468        | FZD5           | frizzled family receptor 5                                      | ENST00000295417 | -0,608844125 |
| A_33_P3735158  | AK093004         | LOC286272      | uncharacterized LOC286272                                       |                 | -0,6088773   |
| A_24_P216253   | NM_014902        | DLGAP4         | discs, large (Drosophila) homolog-associated protein 4          | ENST00000373907 | -0,609104521 |
| A_24_P233488   | NM_002309        | LIF            | leukemia inhibitory factor (cholinergic differentiation factor) | ENST00000249075 | -0,60918529  |
| A_23_P147918   | NM_080388        | S100A16        | S100 calcium binding protein A16                                | ENST00000368703 | -0,60957222  |
| A_23_P370625   | NM_020451        | SEPN1          | selenoprotein N, 1                                              | ENST00000374315 | -0,609577682 |
| A_19_P00320759 | XR_108575        | FLJ32255       | uncharacterized LOC643977                                       |                 | -0,609642747 |
| A_19_P00320101 | NR_024344        | LOC283174      | uncharacterized LOC283174                                       |                 | -0,609651985 |
| A_23_P54918    | NM_153486        | LDHD           | lactate dehydrogenase D                                         | ENST00000300051 | -0,609703192 |
| A_21_P0013513  | TCONS_I2_0002818 | XLOC_I2_014505 |                                                                 |                 | -0,609747554 |
| A_23_P376488   | NM_000594        | TNF            | tumor necrosis factor                                           | ENST00000376122 | -0,610107053 |
| A_23_P103070   | NM_003405        | YWHAH          | tyrosine 3-monooxygenase/tryptophan 5-monooxygenase 2           | ENST00000248975 | -0,610137205 |
| A_23_P92499    | NM_003264        | TLR2           | toll-like receptor 2                                            | ENST00000260010 | -0,610230179 |
| A_21_P0006661  | ENST00000450270  | XLOC_008416    |                                                                 | ENST00000450270 | -0,610295255 |
| A_21_P0000190  | NM_002285        | AFF3           | AF4/FMR2 family, member 3                                       | ENST00000317233 | -0,610363631 |
| A_23_P20876    | NM_177995        | PTPDC1         | protein tyrosine phosphatase domain containing 1                | ENST00000375360 | -0,610422813 |
| A_23_P109913   | NM_006564        | CXCR6          | chemokine (C-X-C motif) receptor 6                              | ENST00000438735 | -0,610477623 |
| A_23_P123086   | NR_027329        | KIAA1908       | uncharacterized LOC114796                                       |                 | -0,610591888 |
| A_23_P35871    | NM_024680        | E2F8           | E2F transcription factor 8                                      | ENST00000396159 | -0,610651893 |
| A_23_P118536   | NM_018042        | SLFN12         | schlafen family member 12                                       | ENST00000479326 | -0,610683568 |
| A_24_P49447    | NM_020829        | KIAA1432       | KIAA1432                                                        | ENST00000418622 | -0,610756765 |
| A_33_P3245163  | M13930           | MYC            | v-myc myelocytomatosis viral oncogene homolog (avian)           | ENST00000259523 | -0,610800781 |
| A_33_P3392525  | NM_001661        | ARL4D          | ADP-ribosylation factor-like 4D                                 | ENST00000320033 | -0,611429992 |
| A_23_P102017   | NM_020711        | ERMN           | ermin, ERM-like protein                                         | ENST00000397283 | -0,611463977 |
| A_21_P0013353  | TCONS_I2_0002695 | XLOC_I2_014048 |                                                                 |                 | -0,611767079 |
| A_21_P0010914  | ENST00000420049  | XLOC_I2_001462 |                                                                 | ENST00000420049 | -0,611866805 |
| A_23_P374082   | NM_033274        | ADAM19         | ADAM metallopeptidase domain 19                                 | ENST00000257527 | -0,61206989  |

|                |                 |                |                                                                       |                 |              |
|----------------|-----------------|----------------|-----------------------------------------------------------------------|-----------------|--------------|
| A_23_P122077   | NM_016591       | GCNT4          | glucosaminyl (N-acetyl) transferase 4, core 2                         | ENST00000322348 | -0,612098936 |
| A_21_P0000869  | NR_039975       | LOC100506229   | uncharacterized LOC100506229                                          |                 | -0,612224267 |
| A_23_P215634   | NM_001013398    | IGFBP3         | insulin-like growth factor binding protein 3                          | ENST00000438491 | -0,612466099 |
| A_33_P3225066  | NM_201262       | DNAJC12        | DnaJ (Hsp40) homolog, subfamily C, member 12                          | ENST00000480180 | -0,612481017 |
| A_23_P120467   | NM_199427       | ZFP64          | zinc finger protein 64 homolog (mouse)                                | ENST00000361387 | -0,61270581  |
| A_33_P3321711  | NM_006809       | TOMM34         | translocase of outer mitochondrial membrane 34                        | ENST00000372813 | -0,613089403 |
| A_19_P00317052 | NM_020914       | RNF213         |                                                                       | ENST00000456466 | -0,613091773 |
| A_21_P0010156  | ENST00000436529 | XLOC_013905    |                                                                       | ENST00000436529 | -0,613418808 |
| A_23_P391443   | NM_020700       | PPM1H          | protein phosphatase, Mg <sup>2+</sup> /Mn <sup>2+</sup> dependent, 1H | ENST00000228705 | -0,613487107 |
| A_23_P48056    | NM_006825       | CKAP4          | cytoskeleton-associated protein 4                                     | ENST00000378026 | -0,613520628 |
| A_21_P0007573  | ENST00000539116 | XLOC_009788    |                                                                       | ENST00000539116 | -0,613546872 |
| A_21_P0013743  | ENST00000426204 | XLOC_I2_015342 |                                                                       | ENST00000426204 | -0,61372647  |
| A_21_P0000130  | NM_001195541    | LOC100289187   | transmembrane protein 225-like                                        |                 | -0,613731957 |
| A_23_P371215   | NM_012092       | ICOS           | inducible T-cell co-stimulator                                        | ENST00000316386 | -0,613750902 |
| A_32_P22401    | NM_018067       | MAP7D1         | MAP7 domain containing 1                                              | ENST00000373148 | -0,613787871 |
| A_23_P109913   | NM_006564       | CXCR6          | chemokine (C-X-C motif) receptor 6                                    | ENST00000438735 | -0,614092538 |
| A_23_P330262   | NM_012398       | PIP5K1C        | phosphatidylinositol-4-phosphate 5-kinase, type I, gamma              | ENST00000335312 | -0,614230958 |
| A_23_P104318   | NM_019058       | DDIT4          | DNA-damage-inducible transcript 4                                     | ENST00000307365 | -0,614571886 |
| A_33_P3311083  | AK097512        | PHLDB3         | pleckstrin homology-like domain, family B, member 3                   |                 | -0,614691119 |
| A_33_P3411427  | NM_001129730    | ZNF837         | zinc finger protein 837                                               | ENST00000427624 | -0,614931669 |
| A_33_P3231613  | NM_001129828    | CSAG3          | CSAG family, member 3                                                 | ENST00000356911 | -0,615288841 |
| A_23_P60627    | NM_001141       | ALOX15B        | arachidonate 15-lipoxygenase, type B                                  | ENST00000380173 | -0,615434515 |
| A_23_P50146    | NM_213602       | SIGLEC15       | sialic acid binding Ig-like lectin 15                                 | ENST00000389474 | -0,615457217 |
| A_23_P19333    | NM_018643       | TREM1          | triggering receptor expressed on myeloid cells 1                      | ENST00000244709 | -0,615863202 |
| A_23_P116264   | NM_006176       | NRGN           | neurogranin (protein kinase C substrate, RC3)                         | ENST00000284292 | -0,616030574 |
| A_33_P3356731  | NM_015332       | NUDCD3         | NudC domain containing 3                                              | ENST00000355451 | -0,616130432 |
| A_23_P366366   | NM_014766       | SCRN1          | secernin 1                                                            | ENST00000426154 | -0,616529362 |
| A_33_P3327847  | NM_003901       | SGPL1          | sphingosine-1-phosphate lyase 1                                       | ENST00000373202 | -0,616633096 |
| A_19_P00321743 | XR_110148       | LOC100130938   | uncharacterized LOC100130938                                          |                 | -0,61667061  |

|               |                |                |                                                                |                 |              |
|---------------|----------------|----------------|----------------------------------------------------------------|-----------------|--------------|
| A_23_P35456   | NM_014631      | SH3PXD2A       | SH3 and PX domains 2A                                          | ENST00000355946 | -0,616715445 |
| A_23_P417974  | NM_173039      | AQP11          | aquaporin 11                                                   | ENST00000528638 | -0,616787771 |
| A_33_P3322654 | NM_018226      | RNPEPL1        | arginyl aminopeptidase (aminopeptidase B)-like 1               | ENST00000481757 | -0,616792624 |
| A_33_P3398251 | NM_014009      | FOXP3          | forkhead box P3                                                | ENST00000376199 | -0,616802238 |
| A_32_P126375  | NM_198270      | NHS            | Nance-Horan syndrome (congenital cataracts and dental an       | ENST00000398097 | -0,617002036 |
| A_21_P0011514 | NM_001190790   | CDRT15L2       | CMT1A duplicated region transcript 15-like 2                   | ENST00000399044 | -0,617300395 |
| A_23_P151294  | NM_000619      | IFNG           | interferon, gamma                                              | ENST00000229135 | -0,617858944 |
| A_24_P76675   | NM_021647      | MFAP3L         | microfibrillar-associated protein 3-like                       | ENST00000510306 | -0,617861461 |
| A_33_P3240532 | NM_015149      | RGL1           | ral guanine nucleotide dissociation stimulator-like 1          | ENST00000367531 | -0,618065939 |
| A_32_P66881   | NM_138554      | TLR4           | toll-like receptor 4                                           |                 | -0,618389232 |
| A_21_P0007620 | TCONS_00020550 | XLOC_009863    |                                                                |                 | -0,618607063 |
| A_24_P295590  | NM_032023      | RASSF4         | Ras association (RalGDS/AF-6) domain family member 4           | ENST00000489171 | -0,618633735 |
| A_21_P0007880 | XR_110374      | LOC100507195   | uncharacterized LOC100507195                                   |                 | -0,619063861 |
| A_24_P276888  | NM_001199803   | CENPO          | centromere protein O                                           | ENST00000380834 | -0,619111993 |
| A_33_P3369567 | NM_001242932   | LSP1           | lymphocyte-specific protein 1                                  | ENST00000484895 | -0,619152851 |
| A_33_P3358213 | NM_207421      | PADI6          | peptidyl arginine deiminase, type VI                           | ENST00000434762 | -0,619177019 |
| A_33_P3275350 | NM_014286      | NCS1           | neuronal calcium sensor 1                                      | ENST00000372398 | -0,619349867 |
| A_21_P0012477 | THC2685486     | XLOC_I2_010493 |                                                                |                 | -0,619594005 |
| A_23_P409386  | NM_024698      | SLC25A22       | solute carrier family 25 (mitochondrial carrier: glutamate), r | ENST00000320230 | -0,619660183 |
| A_23_P104318  | NM_019058      | DDIT4          | DNA-damage-inducible transcript 4                              | ENST00000307365 | -0,619698255 |
| A_24_P115511  | NM_016322      | RAB14          | RAB14, member RAS oncogene family                              | ENST00000373840 | -0,619736338 |
| A_33_P3219256 | NM_004329      | BMPRI1A        | bone morphogenetic protein receptor, type IA                   | ENST00000224764 | -0,619751536 |
| A_23_P120845  | NM_005080      | XBP1           | X-box binding protein 1                                        | ENST00000415306 | -0,620043742 |
| A_33_P3390950 | AK125852       | LOC100128338   | uncharacterized LOC100128338                                   |                 | -0,620091502 |
| A_23_P120931  | NM_014508      | APOBEC3C       | apolipoprotein B mRNA editing enzyme, catalytic polypeptid     | ENST00000361441 | -0,620542025 |
| A_23_P103877  | NM_001010847   | LRRC38         | leucine rich repeat containing 38                              | ENST00000376085 | -0,620653967 |
| A_23_P204847  | NM_002298      | LCP1           | lymphocyte cytosolic protein 1 (L-plastin)                     | ENST00000398576 | -0,620742174 |
| A_23_P2492    | NM_001734      | C1S            | complement component 1, s subcomponent                         | ENST00000360817 | -0,620753892 |
| A_33_P3306024 | NR_002825      | SIGLEC16       | sialic acid binding Ig-like lectin 16 (gene/pseudogene)        |                 | -0,620803499 |



|                |                 |              |                                                             |                 |              |
|----------------|-----------------|--------------|-------------------------------------------------------------|-----------------|--------------|
| A_33_P3225091  | NM_004756       | NUMBL        | numb homolog (Drosophila)-like                              | ENST00000252891 | -0,620805472 |
| A_23_P113393   | NM_017413       | APLN         | apelin                                                      | ENST00000307484 | -0,62093101  |
| A_23_P120845   | NM_005080       | XBP1         | X-box binding protein 1                                     | ENST00000415306 | -0,62100386  |
| A_23_P202720   | NM_018389       | SLC35C1      | solute carrier family 35, member C1                         | ENST00000456334 | -0,621055097 |
| A_33_P3350056  | NM_005952       | MT1X         | metallothionein 1X                                          | ENST00000394485 | -0,621059782 |
| A_32_P104000   | NM_173475       | DCUN1D3      | DCN1, defective in cullin neddylation 1, domain containing  | ENST00000324344 | -0,621072966 |
| A_33_P3223759  | NM_005121       | MED13        | mediator complex subunit 13                                 | ENST00000397786 | -0,621130653 |
| A_23_P134454   | NM_001753       | CAV1         | caveolin 1, caveolae protein, 22kDa                         | ENST00000341049 | -0,621132183 |
| A_24_P405205   | NM_001001396    | ATP2B4       | ATPase, Ca <sup>++</sup> transporting, plasma membrane 4    | ENST00000367218 | -0,621456596 |
| A_23_P104318   | NM_019058       | DDIT4        | DNA-damage-inducible transcript 4                           | ENST00000307365 | -0,621560087 |
| A_21_P0004248  | TCONS_00009956  | XLOC_004375  |                                                             |                 | -0,621612845 |
| A_23_P100386   | NM_152456       | IL34         | interleukin 34                                              | ENST00000429149 | -0,621721232 |
| A_23_P52727    | NM_182964       | NAV2         | neuron navigator 2                                          | ENST00000396085 | -0,621839953 |
| A_33_P3244578  | AK125061        | LOC100129675 | uncharacterized LOC100129675                                |                 | -0,622097841 |
| A_33_P3227899  | NR_015361       | LOC440896    | uncharacterized LOC440896                                   | ENST00000423390 | -0,622175226 |
| A_23_P106602   | NM_031476       | CRISPLD2     | cysteine-rich secretory protein LCCL domain containing 2    | ENST00000262424 | -0,62228492  |
| A_23_P120845   | NM_005080       | XBP1         | X-box binding protein 1                                     | ENST00000415306 | -0,622437045 |
| A_24_P10233    | NM_014326       | DAPK2        | death-associated protein kinase 2                           | ENST00000457488 | -0,622454083 |
| A_23_P21838    | NM_033133       | CNP          | 2',3'-cyclic nucleotide 3' phosphodiesterase                | ENST00000393892 | -0,622574137 |
| A_23_P120931   | NM_014508       | APOBEC3C     | apolipoprotein B mRNA editing enzyme, catalytic polypeptide | ENST00000361441 | -0,622646477 |
| A_24_P941167   | NM_030641       | APOL6        | apolipoprotein L, 6                                         | ENST00000409652 | -0,622966869 |
| A_23_P300033   | NM_006206       | PDGFRA       | platelet-derived growth factor receptor, alpha polypeptide  | ENST00000257290 | -0,623017902 |
| A_23_P42909    | NM_153345       | TMEM139      | transmembrane protein 139                                   | ENST00000409244 | -0,623068486 |
| A_23_P104318   | NM_019058       | DDIT4        | DNA-damage-inducible transcript 4                           | ENST00000307365 | -0,623189487 |
| A_21_P0014573  | XR_110349       | LOC100293962 | uncharacterized LOC100293962                                |                 | -0,623201257 |
| A_19_P00811048 | NR_024284       | ZEB1-AS1     |                                                             |                 | -0,623554207 |
| A_33_P3367341  | ENST00000369319 | CASP7        | caspase 7, apoptosis-related cysteine peptidase             | ENST00000369319 | -0,623779371 |
| A_33_P3308055  | AB209519        | EIF4E2       | eukaryotic translation initiation factor 4E family member 2 | ENST00000409514 | -0,623986991 |
| A_33_P3307960  | NM_001103170    | AADACL3      | arylacetamide deacetylase-like 3                            | ENST00000359318 | -0,624026687 |



|               |                 |                |                                                              |                 |              |
|---------------|-----------------|----------------|--------------------------------------------------------------|-----------------|--------------|
| A_21_P0014385 | XR_109552       | LOC100506848   | uncharacterized LOC100506848                                 |                 | -0,624215169 |
| A_33_P3266396 | NM_001029885    | GLTPD1         | glycolipid transfer protein domain containing 1              | ENST00000343938 | -0,624258896 |
| A_23_P202860  | NM_024514       | CYP2R1         | cytochrome P450, family 2, subfamily R, polypeptide 1        | ENST00000334636 | -0,624345762 |
| A_33_P3314500 | NM_005961       | MUC6           | mucin 6, oligomeric mucus/gel-forming                        | ENST00000421673 | -0,624405781 |
| A_23_P120845  | NM_005080       | XBP1           | X-box binding protein 1                                      | ENST00000415306 | -0,624578003 |
| A_33_P3291484 | NM_005668       | ST8SIA4        | ST8 alpha-N-acetyl-neuraminide alpha-2,8-sialyltransferase 4 |                 | -0,624694536 |
| A_23_P398449  | NR_028291       | VNN3           | vanin 3                                                      | ENST00000392394 | -0,624844985 |
| A_32_P72110   | NM_006505       | PVR            | poliovirus receptor                                          | ENST00000344956 | -0,624889247 |
| A_33_P3277447 | NM_000112       | SLC26A2        | solute carrier family 26 (sulfate transporter), member 2     | ENST00000286298 | -0,62502015  |
| A_24_P104119  | NM_019034       | RHOF           | ras homolog gene family, member F (in filopodia)             | ENST00000267205 | -0,62521019  |
| A_24_P377124  | NM_000460       | THPO           | thrombopoietin                                               | ENST00000353488 | -0,625356207 |
| A_33_P3309556 | NM_006504       | PTPRE          | protein tyrosine phosphatase, receptor type, E               |                 | -0,625420632 |
| A_23_P161076  | NM_001767       | CD2            | CD2 molecule                                                 | ENST00000369478 | -0,625512236 |
| A_24_P322444  | NM_153719       | NUP62          | nucleoporin 62kDa                                            | ENST00000352066 | -0,62556239  |
| A_21_P0013684 | ENST00000426204 | XLOC_l2_015342 |                                                              | ENST00000426204 | -0,625622594 |
| A_33_P3637909 | NM_015983       | UBE2D4         | ubiquitin-conjugating enzyme E2D 4 (putative)                |                 | -0,625785331 |
| A_23_P104318  | NM_019058       | DDIT4          | DNA-damage-inducible transcript 4                            | ENST00000307365 | -0,625803458 |
| A_23_P1331    | NM_080801       | COL13A1        | collagen, type XIII, alpha 1                                 | ENST00000478219 | -0,625902061 |
| A_23_P419624  | NM_006698       | BLCAP          | bladder cancer associated protein                            | ENST00000414542 | -0,626003767 |
| A_23_P398372  | NM_152833       | C9orf69        | chromosome 9 open reading frame 69                           |                 | -0,626113702 |
| A_23_P102017  | NM_020711       | ERMN           | ermin, ERM-like protein                                      | ENST00000397283 | -0,626122086 |
| A_32_P214925  | NM_173678       | FAM115C        | family with sequence similarity 115, member C                | ENST00000357344 | -0,626262925 |
| A_23_P117782  | NM_018357       | LARP6          | La ribonucleoprotein domain family, member 6                 | ENST00000299213 | -0,626359782 |
| A_23_P8095    | NM_006913       | RNF5           | ring finger protein 5                                        | ENST00000375094 | -0,626403856 |
| A_23_P101319  | NM_152354       | ZNF285         | zinc finger protein 285                                      | ENST00000544719 | -0,626630982 |
| A_23_P25155   | NM_020370       | GPR84          | G protein-coupled receptor 84                                | ENST00000551809 | -0,626710858 |
| A_23_P104318  | NM_019058       | DDIT4          | DNA-damage-inducible transcript 4                            | ENST00000307365 | -0,626878455 |
| A_23_P58132   | NM_004310       | RHOH           | ras homolog gene family, member H                            | ENST00000381799 | -0,627139768 |
| A_23_P117298  | NM_000131       | F7             | coagulation factor VII (serum prothrombin conversion accel   | ENST00000346342 | -0,627286542 |

|               |                   |                |                                                                  |                 |              |
|---------------|-------------------|----------------|------------------------------------------------------------------|-----------------|--------------|
| A_33_P3463355 | BC039302          | LOC286121      | uncharacterized LOC286121                                        |                 | -0,62745508  |
| A_23_P371729  | NM_005266         | GJA5           | gap junction protein, alpha 5, 40kDa                             | ENST00000369237 | -0,627598871 |
| A_21_P0011878 | TCONS_I2_0001427! | XLOC_I2_007788 |                                                                  |                 | -0,62781277  |
| A_24_P219552  | NM_003204         | NFE2L1         | nuclear factor (erythroid-derived 2)-like 1                      | ENST00000361665 | -0,627871045 |
| A_24_P225961  | NM_004393         | DAG1           | dystroglycan 1 (dystrophin-associated glycoprotein 1)            | ENST00000308775 | -0,62807764  |
| A_23_P25835   | NM_002028         | FNTB           | farnesyltransferase, CAAX box, beta                              | ENST00000246166 | -0,628152874 |
| A_23_P49009   | NM_153613         | LPCAT4         | lysophosphatidylcholine acyltransferase 4                        | ENST00000314891 | -0,628186101 |
| A_21_P0010535 | THC2520127        | XLOC_I2_000297 |                                                                  |                 | -0,628280442 |
| A_33_P3413905 | NM_024866         | ADM2           | adrenomedullin 2                                                 | ENST00000362068 | -0,628393075 |
| A_23_P141992  | NM_198706         | HSD11B1L       | hydroxysteroid (11-beta) dehydrogenase 1-like                    | ENST00000339423 | -0,628517429 |
| A_23_P156218  | NM_002104         | GZMK           | granzyme K (granzyme 3; tryptase II)                             | ENST00000231009 | -0,628602731 |
| A_23_P99360   | NM_213590         | TRIM13         | tripartite motif containing 13                                   | ENST00000378182 | -0,628733591 |
| A_23_P117582  | NM_130469         | JDP2           | Jun dimerization protein 2                                       | ENST00000435893 | -0,628757104 |
| A_23_P120845  | NM_005080         | XBP1           | X-box binding protein 1                                          | ENST00000415306 | -0,628886564 |
| A_23_P110052  | NM_023067         | FOXL2          | forkhead box L2                                                  | ENST00000542203 | -0,629119676 |
| A_21_P0002313 | THC2711871        | XLOC_001748    |                                                                  |                 | -0,629341128 |
| A_23_P71926   | NM_002732         | PRKACG         | protein kinase, cAMP-dependent, catalytic, gamma                 | ENST00000377276 | -0,629355108 |
| A_23_P118536  | NM_018042         | SLFN12         | schlafen family member 12                                        | ENST00000479326 | -0,629420844 |
| A_23_P120931  | NM_014508         | APOBEC3C       | apolipoprotein B mRNA editing enzyme, catalytic polypeptide      | ENST00000361441 | -0,629423857 |
| A_24_P942604  | NM_006306         | SMC1A          | structural maintenance of chromosomes 1A                         | ENST00000322213 | -0,629436521 |
| A_33_P3313810 | NM_001971         | CELA1          | chymotrypsin-like elastase family, member 1                      | ENST00000293636 | -0,62956103  |
| A_23_P67932   | NM_000634         | CXCR1          | chemokine (C-X-C motif) receptor 1                               | ENST00000295683 | -0,629598873 |
| A_21_P0013999 | XM_003403404      | LOC100653051   | leukocyte immunoglobulin-like receptor subfamily B member 3-like |                 | -0,629644771 |
| A_23_P308603  | NM_005417         | SRC            | v-src sarcoma (Schmidt-Ruppin A-2) viral oncogene homolog        | ENST00000445403 | -0,62965954  |
| A_24_P145066  | NM_183416         | KIF1B          | kinesin family member 1B                                         | ENST00000377083 | -0,629926767 |
| A_24_P203103  | NM_002351         | SH2D1A         | SH2 domain containing 1A                                         | ENST00000371139 | -0,629950989 |
| A_23_P122976  | NM_002069         | GNAI1          | guanine nucleotide binding protein (G protein), alpha inhibitory | ENST00000351004 | -0,629995417 |
| A_33_P3240512 | NM_138444         | KCTD12         | potassium channel tetramerisation domain containing 12           | ENST00000377474 | -0,630020652 |
| A_24_P184555  | NM_002859         | PXN            | paxillin                                                         | ENST00000323871 | -0,630133241 |

|               |                 |                |                                                              |                 |              |
|---------------|-----------------|----------------|--------------------------------------------------------------|-----------------|--------------|
| A_24_P192262  | NM_005402       | RALA           | v-ral simian leukemia viral oncogene homolog A (ras related) | ENST00000005257 | -0,630748725 |
| A_23_P88865   | NM_144601       | CMTM3          | CKLF-like MARVEL transmembrane domain containing 3           | ENST00000361909 | -0,630891297 |
| A_23_P70213   | NM_000038       | APC            | adenomatous polyposis coli                                   | ENST00000508376 | -0,631201399 |
| A_33_P3259393 | NM_178232       | HAPLN3         | hyaluronan and proteoglycan link protein 3                   | ENST00000359595 | -0,632054965 |
| A_23_P208698  | NM_002103       | GYS1           | glycogen synthase 1 (muscle)                                 | ENST00000323798 | -0,632392675 |
| A_23_P396666  | NM_015079       | TBC1D2B        | TBC1 domain family, member 2B                                | ENST00000300584 | -0,632396893 |
| A_23_P120845  | NM_005080       | XBP1           | X-box binding protein 1                                      | ENST00000415306 | -0,632608815 |
| A_33_P3250671 | NM_003202       | TCF7           | transcription factor 7 (T-cell specific, HMG-box)            | ENST00000522561 | -0,632695114 |
| A_33_P3232552 | NM_000857       | GUCY1B3        | guanylate cyclase 1, soluble, beta 3                         | ENST00000264424 | -0,632813832 |
| A_24_P649624  | NM_183416       | KIF1B          | kinesin family member 1B                                     | ENST00000377093 | -0,632816125 |
| A_33_P3780505 | NR_003658       | MT1DP          | metallothionein 1D, pseudogene                               |                 | -0,632906581 |
| A_21_P0010772 | ENST00000427309 | XLOC_I2_001089 |                                                              | ENST00000427309 | -0,633009107 |
| A_23_P208516  | NM_024298       | MBOAT7         | membrane bound O-acyltransferase domain containing 7         | ENST00000494142 | -0,633057405 |
| A_23_P34597   | NM_001785       | CDA            | cytidine deaminase                                           | ENST00000461985 | -0,633099253 |
| A_23_P104318  | NM_019058       | DDIT4          | DNA-damage-inducible transcript 4                            | ENST00000307365 | -0,633325937 |
| A_33_P3233995 | ENST00000330955 | BAALC          | brain and acute leukemia, cytoplasmic                        | ENST00000330955 | -0,63340644  |
| A_33_P3386242 | NM_006314       | CNKSRI         | connector enhancer of kinase suppressor of Ras 1             | ENST00000374253 | -0,633539083 |
| A_23_P42718   | NM_004289       | NFE2L3         | nuclear factor (erythroid-derived 2)-like 3                  | ENST00000398175 | -0,63360744  |
| A_24_P118938  | NM_080616       | C20orf112      | chromosome 20 open reading frame 112                         | ENST00000359676 | -0,633633902 |
| A_33_P3290089 | XR_109536       | LOC100505585   | uncharacterized LOC100505585                                 |                 | -0,633795628 |
| A_32_P91042   | NR_027406       | LOC100129034   | uncharacterized LOC100129034                                 |                 | -0,633905694 |
| A_33_P3405168 | NM_172250       | MMAA           | methylmalonic aciduria (cobalamin deficiency) cblA type      | ENST00000281317 | -0,633968491 |
| A_23_P60387   | NM_017617       | NOTCH1         | notch 1                                                      | ENST00000277541 | -0,634069401 |
| A_23_P169092  | NM_004820       | CYP7B1         | cytochrome P450, family 7, subfamily B, polypeptide 1        | ENST00000523954 | -0,634256017 |
| A_23_P202117  | ENST00000490164 | PCGF5          | polycomb group ring finger 5                                 | ENST00000490164 | -0,634434134 |
| A_23_P108501  | NM_004438       | EPHA4          | EPH receptor A4                                              | ENST00000392071 | -0,63463487  |
| A_21_P0000485 | NR_003943       | SNORD77        | small nucleolar RNA, C/D box 77                              |                 | -0,634642919 |
| A_23_P319583  | NM_014747       | RIMS3          | regulating synaptic membrane exocytosis 3                    | ENST00000372684 | -0,634663243 |
| A_23_P120845  | NM_005080       | XBP1           | X-box binding protein 1                                      | ENST00000415306 | -0,63477765  |

|                |              |           |                                                               |                 |              |
|----------------|--------------|-----------|---------------------------------------------------------------|-----------------|--------------|
| A_24_P253003   | NM_004626    | WNT11     | wingless-type MMTV integration site family, member 11         | ENST00000447195 | -0,634786373 |
| A_24_P156113   | NM_014601    | EHD2      | EH-domain containing 2                                        | ENST00000263277 | -0,634891766 |
| A_23_P120931   | NM_014508    | APOBEC3C  | apolipoprotein B mRNA editing enzyme, catalytic polypeptide 3 | ENST00000361441 | -0,635029801 |
| A_33_P3294277  | NM_000896    | CYP4F3    | cytochrome P450, family 4, subfamily F, polypeptide 3         | ENST00000221307 | -0,635146621 |
| A_33_P3363188  | NR_033856    | FLJ43315  | asparagine synthetase pseudogene                              |                 | -0,635287523 |
| A_23_P88435    | NM_005197    | FOXN3     | forkhead box N3                                               | ENST00000261302 | -0,635370556 |
| A_33_P3343210  | NM_016612    | SLC25A37  | solute carrier family 25, member 37                           | ENST00000519973 | -0,6355839   |
| A_23_P35399    | NM_145869    | ANXA11    | annexin A11                                                   | ENST00000537102 | -0,635769517 |
| A_23_P104318   | NM_019058    | DDIT4     | DNA-damage-inducible transcript 4                             | ENST00000307365 | -0,635801234 |
| A_33_P3306413  | NM_001167986 | INCA1     | inhibitor of CDK, cyclin A1 interacting protein 1             | ENST00000396829 | -0,635941882 |
| A_33_P3235053  | NM_033452    | TRIM47    | tripartite motif containing 47                                | ENST00000254816 | -0,636054556 |
| A_23_P122077   | NM_016591    | GCNT4     | glucosaminyl (N-acetyl) transferase 4, core 2                 | ENST00000322348 | -0,636256275 |
| A_33_P3222867  | CR933610     | THBS3     | thrombospondin 3                                              |                 | -0,636260626 |
| A_24_P588897   | NM_013272    | SLCO3A1   | solute carrier organic anion transporter family, member 3A    | ENST00000318445 | -0,636284764 |
| A_23_P207387   | NM_032484    | GHDC      | GH3 domain containing                                         | ENST00000301671 | -0,636401751 |
| A_23_P104318   | NM_019058    | DDIT4     | DNA-damage-inducible transcript 4                             | ENST00000307365 | -0,63696101  |
| A_23_P38427    | NM_032932    | RAB11FIP4 | RAB11 family interacting protein 4 (class II)                 | ENST00000325874 | -0,637028553 |
| A_19_P00320155 | NR_023915    | IPW       | imprinted in Prader-Willi syndrome (non-protein coding)       | ENST00000549804 | -0,637130652 |
| A_23_P156907   | NM_018013    | SOBP      | sine oculis binding protein homolog (Drosophila)              | ENST00000230065 | -0,637220079 |
| A_24_P33895    | NM_001040619 | ATF3      | activating transcription factor 3                             | ENST00000366983 | -0,637412364 |
| A_23_P425304   | NM_016169    | SUFU      | suppressor of fused homolog (Drosophila)                      | ENST00000369902 | -0,637512657 |
| A_23_P23074    | NM_006417    | IFI44     | interferon-induced protein 44                                 | ENST00000485662 | -0,637582654 |
| A_33_P3531979  | AK097496     | LOC283352 | uncharacterized LOC283352                                     |                 | -0,637881008 |
| A_23_P109913   | NM_006564    | CXCR6     | chemokine (C-X-C motif) receptor 6                            | ENST00000438735 | -0,638246446 |
| A_24_P246293   | NM_138378    | FDXACB1   | ferredoxin-fold anticodon binding domain containing 1         | ENST00000260257 | -0,638642769 |
| A_21_P0012084  | CF126671     | LOC572558 | uncharacterized LOC572558                                     |                 | -0,638775139 |
| A_23_P117582   | NM_130469    | JDP2      | Jun dimerization protein 2                                    | ENST00000435893 | -0,638779791 |
| A_23_P365614   | NM_004557    | NOTCH4    | notch 4                                                       | ENST00000437843 | -0,639212897 |
| A_33_P3404959  | NM_001013649 | C2orf68   | chromosome 2 open reading frame 68                            | ENST00000306336 | -0,639266532 |

|               |                 |                |                                                            |                 |              |
|---------------|-----------------|----------------|------------------------------------------------------------|-----------------|--------------|
| A_21_P0001626 | ENST00000420762 | XLOC_001209    |                                                            | ENST00000420762 | -0,639473645 |
| A_23_P212655  | NM_130446       | KLHL6          | kelch-like 6 (Drosophila)                                  | ENST00000468734 | -0,639587039 |
| A_23_P52207   | NM_012342       | BAMBI          | BMP and activin membrane-bound inhibitor homolog (Xenc     | ENST00000542444 | -0,639873929 |
| A_21_P0007136 | AK307308        | XLOC_009562    |                                                            |                 | -0,640165858 |
| A_23_P120845  | NM_005080       | XBP1           | X-box binding protein 1                                    | ENST00000415306 | -0,640329501 |
| A_23_P28948   | NM_014012       | REM1           | RAS (RAD and GEM)-like GTP-binding 1                       | ENST00000201979 | -0,640519425 |
| A_23_P123172  | NR_002157       | OR2A9P         | olfactory receptor, family 2, subfamily A, member 9 pseudo | ENST00000461471 | -0,640602637 |
| A_23_P134454  | NM_001753       | CAV1           | caveolin 1, caveolae protein, 22kDa                        | ENST00000341049 | -0,640703082 |
| A_21_P0001225 | ENST00000433576 | XLOC_001214    |                                                            | ENST00000433576 | -0,640744431 |
| A_23_P120845  | NM_005080       | XBP1           | X-box binding protein 1                                    | ENST00000415306 | -0,640750515 |
| A_23_P122077  | NM_016591       | GCNT4          | glucosaminyl (N-acetyl) transferase 4, core 2              | ENST00000322348 | -0,640782361 |
| A_23_P49643   | NM_006613       | GRAP           | GRB2-related adaptor protein                               | ENST00000284154 | -0,640795705 |
| A_21_P0013701 | AK095210        | XLOC_l2_014850 |                                                            |                 | -0,640970213 |
| A_23_P77593   | NM_018052       | VAC14          | Vac14 homolog (S. cerevisiae)                              | ENST00000536184 | -0,640976676 |
| A_21_P0012459 | AL049161        | XLOC_l2_010338 |                                                            |                 | -0,641009467 |
| A_33_P3384045 | XR_110862       | NSAP11         | nervous system abundant protein 11                         |                 | -0,641014575 |
| A_24_P97342   | NM_021935       | PROK2          | prokineticin 2                                             | ENST00000353065 | -0,641207529 |
| A_21_P0014180 | ENST00000474396 | GPR146         | G protein-coupled receptor 146                             | ENST00000474396 | -0,641256682 |
| A_23_P108437  | NM_003468       | FZD5           | frizzled family receptor 5                                 | ENST00000295417 | -0,641289471 |
| A_32_P8925    | NM_001012970    | C1orf100       | chromosome 1 open reading frame 100                        | ENST00000308105 | -0,641518124 |
| A_23_P60517   | NM_181425       | FXN            | frataxin                                                   | ENST00000396366 | -0,641748795 |
| A_33_P3354935 | NM_172212       | CSF1           | colony stimulating factor 1 (macrophage)                   | ENST00000369802 | -0,642019286 |
| A_23_P308603  | NM_005417       | SRC            | v-src sarcoma (Schmidt-Ruppin A-2) viral oncogene homolo   | ENST00000445403 | -0,642182507 |
| A_23_P104318  | NM_019058       | DDIT4          | DNA-damage-inducible transcript 4                          | ENST00000307365 | -0,642477874 |
| A_21_P0012110 | THC2684837      | XLOC_l2_008546 |                                                            |                 | -0,6426219   |
| A_24_P183664  | NM_014817       | TRIL           | TLR4 interactor with leucine-rich repeats                  | ENST00000322982 | -0,642784022 |
| A_24_P126425  | NM_032222       | FAM188B        | family with sequence similarity 188, member B              | ENST00000458257 | -0,643171617 |
| A_23_P113393  | NM_017413       | APLN           | apelin                                                     | ENST00000307484 | -0,643242224 |
| A_23_P101246  | NM_001163922    | VSIG10L        | V-set and immunoglobulin domain containing 10 like         | ENST00000335624 | -0,643268954 |



|               |                   |                |                                                            |                 |              |
|---------------|-------------------|----------------|------------------------------------------------------------|-----------------|--------------|
| A_24_P211797  | NM_178231         | ICA1L          | islet cell autoantigen 1,69kDa-like                        | ENST00000411681 | -0,643531822 |
| A_23_P122052  | NM_001008397      | GPX8           | glutathione peroxidase 8 (putative)                        | ENST00000503787 | -0,643901803 |
| A_33_P3392580 | NM_013411         | AK2            | adenylate kinase 2                                         | ENST00000373449 | -0,643917925 |
| A_23_P103070  | NM_003405         | YWHAH          | tyrosine 3-monooxygenase/tryptophan 5-monooxygenase 2      | ENST00000248975 | -0,643933721 |
| A_32_P456318  | NM_080743         | SRSF12         | serine/arginine-rich splicing factor 12                    | ENST00000452027 | -0,644472442 |
| A_21_P0012241 | TCONS_I2_00017559 | XLOC_I2_009281 |                                                            |                 | -0,644657116 |
| A_23_P7582    | NM_003202         | TCF7           | transcription factor 7 (T-cell specific, HMG-box)          | ENST00000522653 | -0,645188192 |
| A_24_P172990  | NM_001605         | AARS           | alanyl-tRNA synthetase                                     | ENST00000261772 | -0,645227946 |
| A_23_P101871  | NM_024907         | FBXO17         | F-box protein 17                                           | ENST00000292852 | -0,646046789 |
| A_23_P101319  | NM_152354         | ZNF285         | zinc finger protein 285                                    | ENST00000544719 | -0,646387343 |
| A_23_P104762  | NM_006106         | YAP1           | Yes-associated protein 1                                   | ENST00000531439 | -0,646397573 |
| A_23_P69383   | NM_031458         | PARP9          | poly (ADP-ribose) polymerase family, member 9              | ENST00000452457 | -0,647140902 |
| A_23_P121480  | NM_001004196      | CD200          | CD200 molecule                                             | ENST00000478595 | -0,647383428 |
| A_24_P48495   | NM_014400         | LYPD3          | LY6/PLAUR domain containing 3                              | ENST00000244333 | -0,647385217 |
| A_21_P0002671 | ENST00000448595   | XLOC_002221    |                                                            | ENST00000448595 | -0,647410675 |
| A_23_P70566   | NM_022110         | FKBPL          | FK506 binding protein like                                 | ENST00000375156 | -0,64747424  |
| A_33_P3342056 | NM_173799         | TIGIT          | T cell immunoreceptor with Ig and ITIM domains             | ENST00000383671 | -0,647683282 |
| A_23_P406385  | NM_153350         | FBXL16         | F-box and leucine-rich repeat protein 16                   | ENST00000324361 | -0,647782796 |
| A_33_P3269636 | NM_001166034      | SBSN           | suprabasin                                                 | ENST00000518157 | -0,647883837 |
| A_21_P0005910 | ENST00000524079   | TMEM71         | transmembrane protein 71                                   | ENST00000524079 | -0,648010976 |
| A_33_P3302586 | NM_207370         | GPR153         | G protein-coupled receptor 153                             | ENST00000377893 | -0,648137178 |
| A_33_P3359160 | NM_006589         | FAM189B        | family with sequence similarity 189, member B              | ENST00000333966 | -0,649433391 |
| A_33_P3239282 | NM_004974         | KCNA2          | potassium voltage-gated channel, shaker-related subfamily, | ENST00000316361 | -0,649590342 |
| A_23_P411851  | NM_152592         | C14orf49       | chromosome 14 open reading frame 49                        | ENST00000557275 | -0,649941924 |
| A_23_P432573  | NM_145015         | MRGPRF         | MAS-related GPR, member F                                  | ENST00000309099 | -0,649971378 |
| A_33_P3344504 | ENST00000382938   | APBA2          | amyloid beta (A4) precursor protein-binding, family A, mem | ENST00000382938 | -0,650001191 |
| A_23_P308603  | NM_005417         | SRC            | v-src sarcoma (Schmidt-Ruppin A-2) viral oncogene homolog  | ENST00000445403 | -0,650143723 |
| A_23_P108437  | NM_003468         | FZD5           | frizzled family receptor 5                                 | ENST00000295417 | -0,650144812 |
| A_23_P100056  | NM_194272         | RBPMS2         | RNA binding protein with multiple splicing 2               | ENST00000300069 | -0,650147621 |



|               |                 |              |                                                              |                 |              |
|---------------|-----------------|--------------|--------------------------------------------------------------|-----------------|--------------|
| A_23_P207850  | NM_032865       | TNS4         | tensin 4                                                     | ENST00000254051 | -0,65016393  |
| A_24_P176493  | NM_015251       | ATMIN        | ATM interactor                                               | ENST00000299575 | -0,650255056 |
| A_23_P308603  | NM_005417       | SRC          | v-src sarcoma (Schmidt-Ruppin A-2) viral oncogene homolog    | ENST00000445403 | -0,650296664 |
| A_23_P104762  | NM_006106       | YAP1         | Yes-associated protein 1                                     | ENST00000531439 | -0,650404022 |
| A_23_P103070  | NM_003405       | YWHAH        | tyrosine 3-monooxygenase/tryptophan 5-monooxygenase $\alpha$ | ENST00000248975 | -0,650935045 |
| A_23_P123172  | NR_002157       | OR2A9P       | olfactory receptor, family 2, subfamily A, member 9 pseudo   | ENST00000461471 | -0,651176162 |
| A_23_P169003  | NM_022071       | SH2D4A       | SH2 domain containing 4A                                     | ENST00000519207 | -0,651211627 |
| A_21_P0014006 | XM_003403443    | LOC100509263 | uncharacterized LOC100509263                                 |                 | -0,651229882 |
| A_33_P3376821 | NM_006144       | GZMA         | granzyme A (granzyme 1, cytotoxic T-lymphocyte-associated    | ENST00000274306 | -0,651287459 |
| A_23_P333498  | NM_030636       | EEPD1        | endonuclease/exonuclease/phosphatase family domain con       | ENST00000242108 | -0,651524893 |
| A_33_P3389634 | NM_001747       | CAPG         | capping protein (actin filament), gelsolin-like              | ENST00000409724 | -0,651568906 |
| A_23_P126623  | NM_002631       | PGD          | phosphogluconate dehydrogenase                               | ENST00000541529 | -0,65177754  |
| A_23_P134454  | NM_001753       | CAV1         | caveolin 1, caveolae protein, 22kDa                          | ENST00000341049 | -0,651825679 |
| A_21_P0007126 | AK091996        | XLOC_009181  |                                                              |                 | -0,651973693 |
| A_24_P80204   | NM_005434       | MALL         | mal, T-cell differentiation protein-like                     | ENST00000272462 | -0,65203254  |
| A_33_P3350583 | NM_138819       | FAM122C      | family with sequence similarity 122C                         | ENST00000370784 | -0,652378177 |
| A_33_P3272938 | NM_021209       | NLRC4        | NLR family, CARD domain containing 4                         | ENST00000342905 | -0,65242207  |
| A_33_P3387691 | NM_198081       | SCML4        | sex comb on midleg-like 4 (Drosophila)                       | ENST00000369022 | -0,652470481 |
| A_23_P103070  | NM_003405       | YWHAH        | tyrosine 3-monooxygenase/tryptophan 5-monooxygenase $\alpha$ | ENST00000248975 | -0,652493918 |
| A_24_P199655  | NM_138959       | VANGL1       | vang-like 1 (van gogh, Drosophila)                           | ENST00000310260 | -0,653055279 |
| A_23_P150316  | NM_002426       | MMP12        | matrix metalloproteinase 12 (macrophage elastase)            |                 | -0,653113414 |
| A_21_P0006015 | ENST00000419576 | XLOC_007389  |                                                              | ENST00000419576 | -0,653119657 |
| A_23_P103070  | NM_003405       | YWHAH        | tyrosine 3-monooxygenase/tryptophan 5-monooxygenase $\alpha$ | ENST00000248975 | -0,6531742   |
| A_33_P3407314 | BC050402        | LOC100132707 | uncharacterized LOC100132707                                 | ENST00000397551 | -0,653330862 |
| A_23_P1331    | NM_080801       | COL13A1      | collagen, type XIII, alpha 1                                 | ENST00000478219 | -0,653361338 |
| A_23_P66117   | NM_032039       | ITFG3        | integrin alpha FG-GAP repeat containing 3                    | ENST00000301678 | -0,65343755  |
| A_33_P3357087 | NM_002437       | MPV17        | MpV17 mitochondrial inner membrane protein                   | ENST00000380044 | -0,653954337 |
| A_32_P452655  | NM_001040078    | LGALS9C      | lectin, galactoside-binding, soluble, 9C                     | ENST00000423676 | -0,654199585 |
| A_23_P108437  | NM_003468       | FZD5         | frizzled family receptor 5                                   | ENST00000295417 | -0,654236454 |

|               |                |                |                                                                  |                 |              |
|---------------|----------------|----------------|------------------------------------------------------------------|-----------------|--------------|
| A_24_P186342  | NM_020917      | ZFP14          | zinc finger protein 14 homolog (mouse)                           | ENST00000270001 | -0,65423865  |
| A_23_P138271  | NM_138795      | ARL8A          | ADP-ribosylation factor-like 8A                                  | ENST00000272217 | -0,65457313  |
| A_23_P308603  | NM_005417      | SRC            | v-src sarcoma (Schmidt-Ruppin A-2) viral oncogene homolog        | ENST00000445403 | -0,654637439 |
| A_33_P3385376 | NM_001040709   | SYPL2          | synaptophysin-like 2                                             |                 | -0,654705975 |
| A_23_P212400  | NM_012191      | NAT6           | N-acetyltransferase 6 (GCN5-related)                             | ENST00000443842 | -0,65494226  |
| A_24_P122403  | NM_003198      | TCEB3          | transcription elongation factor B (SIII), polypeptide 3 (110kDa) | ENST00000418390 | -0,654982863 |
| A_24_P626981  | NR_002949      | NUDT16P1       | nudix (nucleoside diphosphate linked moiety X)-type motif 16     | ENST00000498923 | -0,655017803 |
| A_23_P124190  | NM_130390      | TRIM34         | tripartite motif containing 34                                   | ENST00000491385 | -0,655335018 |
| A_23_P383031  | NM_032449      | CC2D1B         | coiled-coil and C2 domain containing 1B                          | ENST00000371586 | -0,65590733  |
| A_23_P60387   | NM_017617      | NOTCH1         | notch 1                                                          | ENST00000277541 | -0,656078716 |
| A_21_P0013662 | NM_001540      | HSPB1          | heat shock 27kDa protein 1                                       | ENST00000447574 | -0,656137409 |
| A_21_P0008133 | TCONS_00021948 | XLOC_010545    |                                                                  |                 | -0,656466048 |
| A_23_P14035   | NM_006422      | AKAP3          | A kinase (PRKA) anchor protein 3                                 | ENST00000545990 | -0,656664758 |
| A_23_P332960  | NM_001042463   | TMEM80         | transmembrane protein 80                                         | ENST00000492023 | -0,656752278 |
| A_23_P101246  | NM_001163922   | VSIG10L        | V-set and immunoglobulin domain containing 10 like               | ENST00000335624 | -0,65694284  |
| A_23_P218597  | NM_002518      | NPAS2          | neuronal PAS domain protein 2                                    | ENST00000474550 | -0,657099816 |
| A_21_P0002453 | TCONS_00004286 | XLOC_002131    |                                                                  |                 | -0,657116782 |
| A_23_P390518  | NM_003839      | TNFRSF11A      | tumor necrosis factor receptor superfamily, member 11a, N        | ENST00000382790 | -0,657308814 |
| A_23_P34093   | NM_000402      | G6PD           | glucose-6-phosphate dehydrogenase                                | ENST00000369620 | -0,657512973 |
| A_33_P3407289 | NR_027436      | LOC283788      | FSHD region gene 1 pseudogene                                    | ENST00000418749 | -0,65856657  |
| A_32_P206479  | NM_178457      | ZNF831         | zinc finger protein 831                                          | ENST00000371030 | -0,65856939  |
| A_33_P3411632 | NM_025268      | TMEM121        | transmembrane protein 121                                        | ENST00000392519 | -0,658830579 |
| A_21_P0014586 | XR_110396      | LOC100128262   | uncharacterized LOC100128262                                     |                 | -0,659024594 |
| A_33_P3281333 | NM_006750      | SNTB2          | syntrophin, beta 2 (dystrophin-associated protein A1, 59kDa)     | ENST00000336278 | -0,659088067 |
| A_21_P0013848 | NM_005197      | FOXN3          | forkhead box N3                                                  | ENST00000431331 | -0,659596094 |
| A_23_P120467  | NM_199427      | ZFP64          | zinc finger protein 64 homolog (mouse)                           | ENST00000361387 | -0,659708268 |
| A_21_P0013056 | THC2730466     | XLOC_I2_012847 |                                                                  |                 | -0,659736164 |
| A_33_P3421728 | NM_001346      | DGKG           | diacylglycerol kinase, gamma 90kDa                               | ENST00000265022 | -0,659771284 |
| A_33_P3416286 | NM_006047      | RBM12          | RNA binding motif protein 12                                     | ENST00000359646 | -0,660327548 |

|               |                                 |              |                                                                                       |                 |              |
|---------------|---------------------------------|--------------|---------------------------------------------------------------------------------------|-----------------|--------------|
| A_23_P318420  | NM_018704                       | CTTNBP2NL    | CTTNBP2 N-terminal like                                                               | ENST00000271277 | -0,66037371  |
| A_23_P125977  | NM_172369                       | C1QC         | complement component 1, q subcomponent, C chain                                       | ENST00000374637 | -0,66042179  |
| A_23_P74088   | NM_006983                       | MMP23B       | matrix metalloproteinase 23B                                                          | ENST00000512731 | -0,66066119  |
| A_23_P308603  | NM_005417                       | SRC          | v-src sarcoma (Schmidt-Ruppin A-2) viral oncogene homolog                             | ENST00000445403 | -0,661372079 |
| A_23_P118254  | NM_001451                       | FOXF1        | forkhead box F1                                                                       | ENST00000262426 | -0,661668132 |
| A_24_P941912  | NM_138287                       | DTX3L        | deltex 3-like (Drosophila)                                                            | ENST00000296161 | -0,661787012 |
| A_24_P80181   | NM_017849                       | TMEM127      | transmembrane protein 127                                                             | ENST00000258439 | -0,662282253 |
| A_23_P419714  | NM_001018072                    | BTBD11       | BTB (POZ) domain containing 11                                                        | ENST00000280758 | -0,662338189 |
| A_23_P212423  | NM_005108                       | XYLB         | xylulokinase homolog (H. influenzae)                                                  | ENST00000207870 | -0,662474215 |
| A_21_P0000292 | NR_002829                       | P2RX6P       | purinergic receptor P2X, ligand-gated ion channel, 6 pseudoreceptor                   | ENST00000439119 | -0,66252602  |
| A_23_P207632  | NM_174953                       | ATP2A3       | ATPase, Ca <sup>++</sup> transporting, ubiquitous                                     | ENST00000359983 | -0,663393307 |
| A_23_P101246  | NM_001163922                    | VSIG10L      | V-set and immunoglobulin domain containing 10 like                                    | ENST00000335624 | -0,663436144 |
| A_23_P135248  | NM_006664                       | CCL27        | chemokine (C-C motif) ligand 27                                                       | ENST00000556719 | -0,663451877 |
| A_23_P155539  | NM_000306                       | POU1F1       | POU class 1 homeobox 1                                                                | ENST00000344265 | -0,663560159 |
| A_24_P329487  | NM_174911                       | FAM84B       | family with sequence similarity 84, member B                                          | ENST00000304916 | -0,663643401 |
| A_24_P277657  | NM_006877                       | GMPR         | guanosine monophosphate reductase                                                     | ENST00000540478 | -0,663645437 |
| A_32_P86763   | NM_004613                       | TGM2         | transglutaminase 2 (C polypeptide, protein-glutamine-gamma-glutamyl transglutaminase) | ENST00000361475 | -0,663859022 |
| A_24_P555066  | NM_198501                       | SMTNL2       | smoothelin-like 2                                                                     | ENST00000338859 | -0,664381984 |
| A_33_P3231140 | NM_001167882                    | ANKRD50      | ankyrin repeat domain 50                                                              | ENST00000504087 | -0,664707569 |
| A_24_P97405   | NM_003965                       | CCRL2        | chemokine (C-C motif) receptor-like 2                                                 | ENST00000400880 | -0,664765957 |
| A_23_P74112   | NM_170743                       | IL28RA       | interleukin 28 receptor, alpha (interferon, lambda receptor)                          | ENST00000327535 | -0,664825142 |
| A_23_P103070  | NM_003405                       | YWHAH        | tyrosine 3-monooxygenase/tryptophan 5-monooxygenase activator domain                  | ENST00000248975 | -0,664933294 |
| A_21_P0011907 | TCONS_I2_0001447(XLOC_I2_007931 |              |                                                                                       |                 | -0,664973264 |
| A_21_P0014816 | XR_132649                       | LOC100506694 | uncharacterized LOC100506694                                                          |                 | -0,665322143 |
| A_23_P138835  | NM_005186                       | CAPN1        | calpain 1, (mu/l) large subunit                                                       | ENST00000259755 | -0,666613899 |
| A_23_P85903   | NM_003268                       | TLR5         | toll-like receptor 5                                                                  | ENST00000342210 | -0,666833762 |
| A_33_P3606465 | NR_033754                       | CBX3P2       | chromobox homolog 3 pseudogene 2                                                      |                 | -0,666893685 |
| A_33_P3380101 | NM_018067                       | MAP7D1       | MAP7 domain containing 1                                                              | ENST00000373153 | -0,666961601 |
| A_23_P10025   | NM_006159                       | NELL2        | NEL-like 2 (chicken)                                                                  | ENST00000437801 | -0,667114008 |

|               |                 |             |                                                             |                 |              |
|---------------|-----------------|-------------|-------------------------------------------------------------|-----------------|--------------|
| A_32_P174572  | NR_002774       | HTR7P1      | 5-hydroxytryptamine (serotonin) receptor 7 pseudogene 1     | ENST00000535469 | -0,667154676 |
| A_33_P3263890 | NM_006902       | PRRX1       | paired related homeobox 1                                   | ENST00000239461 | -0,667203887 |
| A_21_P0006026 | ENST00000421297 | XLOC_007450 |                                                             | ENST00000421297 | -0,667235345 |
| A_23_P217917  | NM_147148       | GSTM4       | glutathione S-transferase mu 4                              | ENST00000493171 | -0,667468724 |
| A_23_P58009   | NM_024616       | C3orf52     | chromosome 3 open reading frame 52                          | ENST00000264848 | -0,667520163 |
| A_24_P167642  | NM_000161       | GCH1        | GTP cyclohydrolase 1                                        | ENST00000254299 | -0,667891257 |
| A_33_P3239839 | NM_024963       | FBXL18      | F-box and leucine-rich repeat protein 18                    | ENST00000538679 | -0,667995605 |
| A_24_P396167  | NM_001335       | CTSW        | cathepsin W                                                 | ENST00000307886 | -0,668168216 |
| A_24_P399230  | NM_175575       | WFIKKN2     | WAP, follistatin/kazal, immunoglobulin, kunitz and netrin d | ENST00000311378 | -0,668521287 |
| A_21_P0002866 | ENST00000484675 | XLOC_003190 |                                                             | ENST00000484675 | -0,668765123 |
| A_21_P0001573 | GD150158        | XLOC_000978 |                                                             |                 | -0,668857524 |
| A_32_P84369   | NM_001079529    | FAM153B     | family with sequence similarity 153, member B               | ENST00000502475 | -0,668864265 |
| A_23_P66432   | NM_032646       | TTYH2       | tweety homolog 2 (Drosophila)                               | ENST00000441391 | -0,668883126 |
| A_23_P114164  | NM_013444       | UBQLN2      | ubiquilin 2                                                 | ENST00000338222 | -0,669297176 |
| A_23_P369815  | NM_000639       | FASLG       | Fas ligand (TNF superfamily, member 6)                      | ENST00000367721 | -0,669371204 |
| A_23_P117782  | NM_018357       | LARP6       | La ribonucleoprotein domain family, member 6                | ENST00000299213 | -0,669389886 |
| A_33_P3407042 | NM_080605       | B3GALT6     | UDP-Gal:betaGal beta 1,3-galactosyltransferase polypeptide  | ENST00000379198 | -0,669544288 |
| A_23_P219060  | NM_022107       | GPSM3       | G-protein signaling modulator 3                             | ENST00000375040 | -0,669609823 |
| A_21_P0011933 | NR_037597       | LOC442028   | uncharacterized LOC442028                                   |                 | -0,669714682 |
| A_24_P263910  | ENST00000529902 | C14orf182   | chromosome 14 open reading frame 182                        | ENST00000529902 | -0,669984962 |
| A_23_P399501  | NM_182470       | PKM2        | pyruvate kinase, muscle                                     | ENST00000449901 | -0,669989439 |
| A_23_P415706  | NM_198827       | GPR133      | G protein-coupled receptor 133                              | ENST00000261654 | -0,6702428   |
| A_33_P3399267 | NM_172200       | IL15RA      | interleukin 15 receptor, alpha                              | ENST00000379972 | -0,670263577 |
| A_23_P308603  | NM_005417       | SRC         | v-src sarcoma (Schmidt-Ruppin A-2) viral oncogene homolog   | ENST00000445403 | -0,670821345 |
| A_33_P3415216 | NM_002437       | MPV17       | MpV17 mitochondrial inner membrane protein                  | ENST00000426513 | -0,670873856 |
| A_23_P113393  | NM_017413       | APLN        | apelin                                                      | ENST00000307484 | -0,670973179 |
| A_33_P3344482 | NM_001135000    | FERMT2      | fermitin family member 2                                    | ENST00000399304 | -0,67102854  |
| A_23_P103070  | NM_003405       | YWHAH       | tyrosine 3-monooxygenase/tryptophan 5-monooxygenase alpha   | ENST00000248975 | -0,671109881 |
| A_33_P3382324 | NM_012217       | TPSD1       | tryptase delta 1                                            | ENST00000211076 | -0,671163007 |

|               |                 |              |                                                              |                 |              |
|---------------|-----------------|--------------|--------------------------------------------------------------|-----------------|--------------|
| A_23_P158096  | ENST00000468565 | COL27A1      | collagen, type XXVII, alpha 1                                | ENST00000468565 | -0,671556824 |
| A_21_P0003318 | BC027846        | XLOC_003603  |                                                              |                 | -0,671828738 |
| A_23_P121596  | NM_002704       | PPBP         | pro-platelet basic protein (chemokine (C-X-C motif) ligand 7 | ENST00000296028 | -0,672041178 |
| A_24_P48627   | ENST00000262971 | PIAS4        | protein inhibitor of activated STAT, 4                       | ENST00000262971 | -0,672230226 |
| A_23_P101246  | NM_001163922    | VSIG10L      | V-set and immunoglobulin domain containing 10 like           | ENST00000335624 | -0,672234959 |
| A_23_P308603  | NM_005417       | SRC          | v-src sarcoma (Schmidt-Ruppin A-2) viral oncogene homolo     | ENST00000445403 | -0,672359326 |
| A_23_P122077  | NM_016591       | GCNT4        | glucosaminyl (N-acetyl) transferase 4, core 2                | ENST00000322348 | -0,672550301 |
| A_33_P3281795 | NM_007283       | MGLL         | monoglyceride lipase                                         | ENST00000265052 | -0,673109637 |
| A_23_P103070  | NM_003405       | YWHAH        | tyrosine 3-monooxygenase/tryptophan 5-monooxygenase $\alpha$ | ENST00000248975 | -0,673204445 |
| A_33_P3268304 | NM_001161404    | LIMS2        | LIM and senescent cell antigen-like domains 2                | ENST00000537572 | -0,673619057 |
| A_23_P11262   | NM_012151       | F8A1         | coagulation factor VIII-associated 1                         | ENST00000369445 | -0,673690714 |
| A_33_P3216694 | NM_024503       | HIVEP3       | human immunodeficiency virus type I enhancer binding pro     | ENST00000247584 | -0,673713459 |
| A_23_P300600  | NM_021076       | NEFH         | neurofilament, heavy polypeptide                             | ENST00000310624 | -0,674354897 |
| A_23_P168916  | NM_001738       | CA1          | carbonic anhydrase I                                         | ENST00000523022 | -0,674408973 |
| A_23_P114164  | NM_013444       | UBQLN2       | ubiquilin 2                                                  | ENST00000338222 | -0,674518763 |
| A_33_P3310274 | ENST00000420582 | LGR6         | leucine-rich repeat containing G protein-coupled receptor 6  | ENST00000420582 | -0,67458098  |
| A_23_P114164  | NM_013444       | UBQLN2       | ubiquilin 2                                                  | ENST00000338222 | -0,674607013 |
| A_23_P215634  | NM_001013398    | IGFBP3       | insulin-like growth factor binding protein 3                 | ENST00000438491 | -0,67478205  |
| A_21_P0014404 | ENST00000422459 | LOC100506115 |                                                              | ENST00000422459 | -0,674800811 |
| A_23_P432610  | NM_153029       | N4BP1        | NEDD4 binding protein 1                                      | ENST00000262384 | -0,674818379 |
| A_23_P103070  | NM_003405       | YWHAH        | tyrosine 3-monooxygenase/tryptophan 5-monooxygenase $\alpha$ | ENST00000248975 | -0,674939695 |
| A_21_P0006078 | CR627148        | XLOC_007710  |                                                              |                 | -0,674997207 |
| A_33_P3805090 | NM_020840       | FNIP2        | folliculin interacting protein 2                             | ENST00000379346 | -0,675097539 |
| A_23_P114164  | NM_013444       | UBQLN2       | ubiquilin 2                                                  | ENST00000338222 | -0,675464763 |
| A_33_P3407880 | NM_144590       | ANKRD22      | ankyrin repeat domain 22                                     |                 | -0,675513549 |
| A_24_P125469  | NM_006033       | LIPG         | lipase, endothelial                                          | ENST00000261292 | -0,675691146 |
| A_33_P3317376 | NM_001665       | RHOG         | ras homolog gene family, member G (rho G)                    | ENST00000396978 | -0,67595116  |
| A_23_P308603  | NM_005417       | SRC          | v-src sarcoma (Schmidt-Ruppin A-2) viral oncogene homolo     | ENST00000445403 | -0,676502374 |
| A_23_P101246  | NM_001163922    | VSIG10L      | V-set and immunoglobulin domain containing 10 like           | ENST00000335624 | -0,676675691 |



|               |                 |              |                                                              |                 |              |
|---------------|-----------------|--------------|--------------------------------------------------------------|-----------------|--------------|
| A_23_P255126  | NM_080612       | GAB3         | GRB2-associated binding protein 3                            | ENST00000369575 | -0,676956635 |
| A_23_P108501  | NM_004438       | EPHA4        | EPH receptor A4                                              | ENST00000392071 | -0,677035663 |
| A_33_P3338928 | NM_001343       | DAB2         | disabled homolog 2, mitogen-responsive phosphoprotein (I     | ENST00000320816 | -0,677087711 |
| A_33_P3348001 | XM_001716901    | LOC100130458 | uncharacterized LOC100130458                                 |                 | -0,677374778 |
| A_23_P90311   | NM_182919       | TICAM1       | toll-like receptor adaptor molecule 1                        | ENST00000248244 | -0,677560055 |
| A_23_P204246  | NM_004426       | PHC1         | polyhomeotic homolog 1 (Drosophila)                          | ENST00000251757 | -0,677635263 |
| A_23_P14083   | NM_181847       | AMIGO2       | adhesion molecule with Ig-like domain 2                      | ENST00000429635 | -0,677854587 |
| A_23_P152406  | NM_032330       | CAPNS2       | calpain, small subunit 2                                     | ENST00000457326 | -0,677915285 |
| A_23_P77653   | NM_000339       | SLC12A3      | solute carrier family 12 (sodium/chloride transporters), me  | ENST00000262502 | -0,678250418 |
| A_23_P122077  | NM_016591       | GCNT4        | glucosaminyl (N-acetyl) transferase 4, core 2                | ENST00000322348 | -0,678383971 |
| A_23_P118536  | NM_018042       | SLFN12       | schlafen family member 12                                    | ENST00000479326 | -0,678457298 |
| A_33_P3251552 | NM_001029871    | RSPO4        | R-spondin 4                                                  | ENST00000217260 | -0,678737003 |
| A_23_P74359   | NM_004078       | CSRP1        | cysteine and glycine-rich protein 1                          | ENST00000340006 | -0,678946268 |
| A_24_P132383  | NM_175571       | GIMAP8       | GTPase, IMAP family member 8                                 | ENST00000307271 | -0,678983156 |
| A_23_P121480  | NM_001004196    | CD200        | CD200 molecule                                               | ENST00000478595 | -0,679092547 |
| A_24_P19544   | NM_013233       | STK39        | serine threonine kinase 39                                   | ENST00000355999 | -0,679317113 |
| A_33_P3879789 | BC043286        | LOC339316    | uncharacterized LOC339316                                    |                 | -0,679319641 |
| A_23_P55251   | NM_002204       | ITGA3        | integrin, alpha 3 (antigen CD49C, alpha 3 subunit of VLA-3 r | ENST00000505306 | -0,679359005 |
| A_23_P115444  | NM_005092       | TNFSF18      | tumor necrosis factor (ligand) superfamily, member 18        | ENST00000404377 | -0,67949372  |
| A_33_P3287108 | NM_207313       | TMEM132E     | transmembrane protein 132E                                   | ENST00000321639 | -0,67953677  |
| A_23_P119835  | NM_021209       | NLRC4        | NLR family, CARD domain containing 4                         | ENST00000404025 | -0,679725855 |
| A_33_P3390042 | NR_015409       | LOC143188    | uncharacterized LOC143188                                    |                 | -0,679983115 |
| A_21_P0000768 | NR_038331       | LOC100505545 | uncharacterized LOC100505545                                 | ENST00000507726 | -0,679983226 |
| A_23_P122508  | NM_080870       | DPCR1        | diffuse panbronchiolitis critical region 1                   | ENST00000414703 | -0,680109665 |
| A_33_P3544856 | AK090616        | LOC100292680 | uncharacterized LOC100292680                                 |                 | -0,68017671  |
| A_23_P152807  | NM_018346       | RSAD1        | radical S-adenosyl methionine domain containing 1            | ENST00000258955 | -0,680320136 |
| A_23_P11262   | NM_012151       | F8A1         | coagulation factor VIII-associated 1                         | ENST00000369445 | -0,680566493 |
| A_33_P3309206 | ENST00000556166 | GABRB3       | gamma-aminobutyric acid (GABA) A receptor, beta 3            | ENST00000556166 | -0,681262511 |
| A_23_P114164  | NM_013444       | UBQLN2       | ubiquilin 2                                                  | ENST00000338222 | -0,681480199 |



|               |              |              |                                                                |                 |              |
|---------------|--------------|--------------|----------------------------------------------------------------|-----------------|--------------|
| A_33_P3353662 | NM_152569    | C9orf66      | chromosome 9 open reading frame 66                             | ENST00000382387 | -0,681525623 |
| A_32_P87013   | NM_000584    | IL8          | interleukin 8                                                  | ENST00000307407 | -0,68159783  |
| A_24_P60441   | NM_153717    | EVC          | Ellis van Creveld syndrome                                     | ENST00000264956 | -0,682163216 |
| A_23_P100001  | NM_207446    | FAM174B      | family with sequence similarity 174, member B                  | ENST00000557398 | -0,682401128 |
| A_23_P107454  | NM_031958    | KRTAP3-1     | keratin associated protein 3-1                                 | ENST00000391588 | -0,682494365 |
| A_24_P835500  | NM_001034841 | ITPRIPL2     | inositol 1,4,5-trisphosphate receptor interacting protein-like | ENST00000381440 | -0,682609558 |
| A_23_P76386   | NM_003044    | SLC6A12      | solute carrier family 6 (neurotransmitter transporter, betair  | ENST00000424061 | -0,682625318 |
| A_21_P0003499 | THC2786806   | XLOC_004063  |                                                                |                 | -0,682734006 |
| A_33_P3318530 | NR_015364    | LOC441204    | uncharacterized LOC441204                                      |                 | -0,683033255 |
| A_23_P122052  | NM_001008397 | GPX8         | glutathione peroxidase 8 (putative)                            | ENST00000503787 | -0,683229671 |
| A_24_P411899  | NM_183419    | RNF19A       | ring finger protein 19A                                        | ENST00000341084 | -0,683274061 |
| A_23_P101246  | NM_001163922 | VSIG10L      | V-set and immunoglobulin domain containing 10 like             | ENST00000335624 | -0,683693677 |
| A_33_P3265189 | NM_001942    | DSG1         | desmoglein 1                                                   |                 | -0,683753729 |
| A_23_P17134   | NM_002371    | MAL          | mal, T-cell differentiation protein                            | ENST00000309988 | -0,683828446 |
| A_23_P90333   | NM_001033719 | ZNF404       | zinc finger protein 404                                        | ENST00000324394 | -0,683918706 |
| A_24_P920646  | BC035714     | CYP19A1      | cytochrome P450, family 19, subfamily A, polypeptide 1         | ENST00000405913 | -0,684028927 |
| A_33_P3382498 | NM_001098612 | SIGLEC14     | sialic acid binding Ig-like lectin 14                          | ENST00000360844 | -0,684060677 |
| A_23_P113471  | NM_174912    | FAAH2        | fatty acid amide hydrolase 2                                   | ENST00000491179 | -0,684178144 |
| A_33_P3495234 | AJ276510     | ORF1         | uncharacterized protein, clone pT-Adv JuaX22                   |                 | -0,684262963 |
| A_24_P102821  | NM_000952    | PTAFR        | platelet-activating factor receptor                            | ENST00000305392 | -0,684561204 |
| A_33_P3214939 | NR_003246    | GOLGA6L5     | golgin A6 family-like 5 (pseudogene)                           |                 | -0,684584889 |
| A_21_P0014437 | XR_109797    | LOC100505930 | uncharacterized LOC100505930                                   |                 | -0,684601173 |
| A_23_P114164  | NM_013444    | UBQLN2       | ubiquilin 2                                                    | ENST00000338222 | -0,684758439 |
| A_23_P332713  | NM_015174    | ZFR2         | zinc finger RNA binding protein 2                              | ENST00000262961 | -0,684875966 |
| A_33_P3219197 | NM_015527    | TBC1D10B     | TBC1 domain family, member 10B                                 | ENST00000490703 | -0,68493219  |
| A_23_P118254  | NM_001451    | FOXF1        | forkhead box F1                                                | ENST00000262426 | -0,684978978 |
| A_24_P168994  | NM_178571    | TBC1D26      | TBC1 domain family, member 26                                  | ENST00000491819 | -0,685049385 |
| A_23_P11262   | NM_012151    | F8A1         | coagulation factor VIII-associated 1                           | ENST00000369445 | -0,685051688 |
| A_24_P567298  | NM_004909    | CSAG2        | CSAG family, member 2                                          | ENST00000356911 | -0,685423221 |

|                |              |                |                                                              |                 |              |
|----------------|--------------|----------------|--------------------------------------------------------------|-----------------|--------------|
| A_23_P106602   | NM_031476    | CRISPLD2       | cysteine-rich secretory protein LCCL domain containing 2     | ENST00000262424 | -0,685505324 |
| A_24_P346431   | NM_022748    | TNS3           | tensin 3                                                     | ENST00000398879 | -0,685522259 |
| A_19_P00321067 | NR_003491    | MIAT           |                                                              |                 | -0,685535769 |
| A_33_P3252221  | NM_080723    | NRSN1          | neurensin 1                                                  | ENST00000378477 | -0,685831294 |
| A_23_P13907    | NM_000618    | IGF1           | insulin-like growth factor 1 (somatomedin C)                 | ENST00000481539 | -0,685886724 |
| A_23_P120467   | NM_199427    | ZFP64          | zinc finger protein 64 homolog (mouse)                       | ENST00000361387 | -0,685969355 |
| A_23_P1331     | NM_080801    | COL13A1        | collagen, type XIII, alpha 1                                 | ENST00000478219 | -0,686031599 |
| A_21_P0012626  | BC032464     | XLOC_l2_010897 |                                                              |                 | -0,686067169 |
| A_23_P310483   | NM_001013842 | C8orf58        | chromosome 8 open reading frame 58                           | ENST00000381191 | -0,686102954 |
| A_33_P3257609  | NM_002481    | PPP1R12B       | protein phosphatase 1, regulatory subunit 12B                | ENST00000367269 | -0,686239137 |
| A_23_P117782   | NM_018357    | LARP6          | La ribonucleoprotein domain family, member 6                 | ENST00000299213 | -0,68633191  |
| A_24_P941268   | NM_007220    | CA5B           | carbonic anhydrase VB, mitochondrial                         | ENST00000318636 | -0,686362252 |
| A_33_P3316273  | NM_002983    | CCL3           | chemokine (C-C motif) ligand 3                               | ENST00000470334 | -0,686495455 |
| A_24_P388528   | NM_173216    | ST6GAL1        | ST6 beta-galactosamide alpha-2,6-sialyltransferase 1         | ENST00000470633 | -0,686719299 |
| A_24_P175187   | NM_017654    | SAMD9          | sterile alpha motif domain containing 9                      | ENST00000379958 | -0,686783825 |
| A_24_P203106   | NM_002625    | PFKFB1         | 6-phosphofructo-2-kinase/fructose-2,6-biphosphatase 1        | ENST00000374992 | -0,686991747 |
| A_24_P6305     | NM_006013    | RPL10          | ribosomal protein L10                                        | ENST00000424325 | -0,687279578 |
| A_21_P0000893  | NR_040051    | LOC100506686   | uncharacterized LOC100506686                                 |                 | -0,687282265 |
| A_23_P122508   | NM_080870    | DPCR1          | diffuse panbronchiolitis critical region 1                   | ENST00000414703 | -0,687409609 |
| A_23_P64860    | NM_003006    | SELPLG         | selectin P ligand                                            | ENST00000550948 | -0,687600017 |
| A_23_P10458    | NM_018280    | C22orf26       | chromosome 22 open reading frame 26                          | ENST00000333761 | -0,687643481 |
| A_23_P119478   | NM_005755    | EBI3           | Epstein-Barr virus induced 3                                 | ENST00000221847 | -0,687774642 |
| A_23_P74229    | NM_032017    | STK40          | serine/threonine kinase 40                                   | ENST00000359297 | -0,687925248 |
| A_23_P46871    | NM_018344    | SLC29A3        | solute carrier family 29 (nucleoside transporters), member 3 | ENST00000373189 | -0,688436558 |
| A_24_P20630    | NM_016269    | LEF1           | lymphoid enhancer-binding factor 1                           | ENST00000503879 | -0,688444216 |
| A_24_P133162   | NM_178122    | C1orf201       | chromosome 1 open reading frame 201                          | ENST00000337248 | -0,688551842 |
| A_23_P334955   | NM_053279    | FAM167A        | family with sequence similarity 167, member A                | ENST00000284486 | -0,688567848 |
| A_23_P48747    | NM_138452    | DHRS1          | dehydrogenase/reductase (SDR family) member 1                | ENST00000396813 | -0,688579117 |
| A_23_P338952   | NM_022753    | S100BP         | S100P binding protein                                        | ENST00000373475 | -0,688668312 |

|               |                  |                |                                                               |                 |              |
|---------------|------------------|----------------|---------------------------------------------------------------|-----------------|--------------|
| A_23_P118254  | NM_001451        | FOXF1          | forkhead box F1                                               | ENST00000262426 | -0,688760514 |
| A_23_P308603  | NM_005417        | SRC            | v-src sarcoma (Schmidt-Ruppin A-2) viral oncogene homolo      | ENST00000445403 | -0,688955274 |
| A_24_P237270  | NM_000675        | ADORA2A        | adenosine A2a receptor                                        | ENST00000417596 | -0,688993365 |
| A_23_P357546  | NM_015488        | PNKD           | paroxysmal nonkinesigenic dyskinesia                          | ENST00000258362 | -0,689142544 |
| A_24_P272313  | NM_207362        | C2orf55        | chromosome 2 open reading frame 55                            | ENST00000397899 | -0,689391688 |
| A_24_P208909  | NM_015271        | TRIM2          | tripartite motif containing 2                                 | ENST00000338700 | -0,689510811 |
| A_23_P118254  | NM_001451        | FOXF1          | forkhead box F1                                               | ENST00000262426 | -0,689584094 |
| A_21_P0011125 | TCONS_I2_0000672 | XLOC_I2_003627 |                                                               |                 | -0,689694684 |
| A_23_P4036    | NM_018469        | TEX2           | testis expressed 2                                            | ENST00000258991 | -0,68996617  |
| A_23_P171095  | NM_001145073     | USP27X         | ubiquitin specific peptidase 27, X-linked                     |                 | -0,690244337 |
| A_21_P0009001 | TCONS_00024547   | XLOC_011858    |                                                               |                 | -0,690448461 |
| A_23_P55749   | NM_015719        | COL5A3         | collagen, type V, alpha 3                                     | ENST00000264828 | -0,690858591 |
| A_23_P103070  | NM_003405        | YWHAH          | tyrosine 3-monooxygenase/tryptophan 5-monooxygenase $\alpha$  | ENST00000248975 | -0,690982688 |
| A_23_P114164  | NM_013444        | UBQLN2         | ubiquilin 2                                                   | ENST00000338222 | -0,691229552 |
| A_21_P0006521 | AF085905         | XLOC_008100    |                                                               |                 | -0,691635917 |
| A_23_P7582    | NM_003202        | TCF7           | transcription factor 7 (T-cell specific, HMG-box)             | ENST00000522653 | -0,691969667 |
| A_24_P941759  | NM_017769        | G2E3           | G2/M-phase specific E3 ubiquitin protein ligase               | ENST00000206595 | -0,692180199 |
| A_23_P69310   | NM_003965        | CCRL2          | chemokine (C-C motif) receptor-like 2                         | ENST00000400882 | -0,692225703 |
| A_32_P347617  | NM_181773        | APOBEC3H       | apolipoprotein B mRNA editing enzyme, catalytic polypeptid    | ENST00000348946 | -0,692414762 |
| A_21_P0014356 | XR_109436        | LOC100507425   | uncharacterized LOC100507425                                  |                 | -0,692472219 |
| A_23_P11262   | NM_012151        | F8A1           | coagulation factor VIII-associated 1                          | ENST00000369445 | -0,692524032 |
| A_23_P7250    | NM_001263        | CDS1           | CDP-diacylglycerol synthase (phosphatidate cytidyltransfe     | ENST00000295887 | -0,692683546 |
| A_33_P3223467 | NM_025054        | VCPIP1         | valosin containing protein (p97)/p47 complex interacting pr   | ENST00000310421 | -0,692958201 |
| A_23_P150903  | NM_018099        | FAR2           | fatty acyl CoA reductase 2                                    | ENST00000182377 | -0,693202113 |
| A_33_P3266674 | NM_025224        | ZBTB46         | zinc finger and BTB domain containing 46                      | ENST00000302995 | -0,693218577 |
| A_33_P3221748 | NM_001031680     | RUNX3          | runt-related transcription factor 3                           | ENST00000338888 | -0,693673692 |
| A_33_P3229552 | NM_020862        | LRFN1          | leucine rich repeat and fibronectin type III domain containir | ENST00000248668 | -0,693785982 |
| A_33_P3413989 | NM_000062        | SERPING1       | serpin peptidase inhibitor, clade G (C1 inhibitor), member 1  | ENST00000405496 | -0,693950729 |
| A_23_P116942  | NM_002286        | LAG3           | lymphocyte-activation gene 3                                  | ENST00000203629 | -0,694166049 |

|               |                 |                |                                                               |                 |              |
|---------------|-----------------|----------------|---------------------------------------------------------------|-----------------|--------------|
| A_32_P480177  | NM_022093       | TNN            | tenascin N                                                    | ENST00000239462 | -0,694321065 |
| A_23_P98900   | NM_025140       | CCDC92         | coiled-coil domain containing 92                              | ENST00000238156 | -0,694412975 |
| A_23_P30435   | NM_006058       | TNIP1          | TNFAIP3 interacting protein 1                                 | ENST00000417127 | -0,694419516 |
| A_23_P36562   | NM_002205       | ITGA5          | integrin, alpha 5 (fibronectin receptor, alpha polypeptide)   | ENST00000552564 | -0,694502873 |
| A_23_P10025   | NM_006159       | NELL2          | NEL-like 2 (chicken)                                          | ENST00000437801 | -0,694766    |
| A_21_P0006597 | ENST00000417585 | XLOC_008311    |                                                               | ENST00000417585 | -0,694843365 |
| A_33_P3415211 | NM_002437       | MPV17          | MpV17 mitochondrial inner membrane protein                    | ENST00000426513 | -0,694894688 |
| A_21_P0000882 | NR_040017       | LOC100507218   | uncharacterized LOC100507218                                  |                 | -0,69506557  |
| A_33_P3240328 | NM_002653       | PITX1          | paired-like homeodomain 1                                     | ENST00000265340 | -0,695417309 |
| A_23_P121480  | NM_001004196    | CD200          | CD200 molecule                                                | ENST00000478595 | -0,695455382 |
| A_33_P3306264 | NM_014400       | LYPD3          | LY6/PLAUR domain containing 3                                 | ENST00000377995 | -0,695466487 |
| A_21_P0012158 | CR627388        | XLOC_I2_008696 |                                                               |                 | -0,695475977 |
| A_23_P348281  | NM_153035       | TCEANC2        | transcription elongation factor A (SII) N-terminal and centra | ENST00000234827 | -0,695506585 |
| A_24_P301454  | NR_003108       | NBR2           | neighbor of BRCA1 gene 2 (non-protein coding)                 | ENST00000464237 | -0,695631779 |
| A_23_P200138  | NM_020125       | SLAMF8         | SLAM family member 8                                          | ENST00000289707 | -0,695973843 |
| A_23_P91640   | NM_020437       | ASPHD2         | aspartate beta-hydroxylase domain containing 2                | ENST00000215906 | -0,696168909 |
| A_24_P193435  | NM_003257       | TJP1           | tight junction protein 1 (zona occludens 1)                   | ENST00000545208 | -0,696227618 |
| A_24_P362540  | NM_003887       | ASAP2          | ArfGAP with SH3 domain, ankyrin repeat and PH domain 2        | ENST00000484590 | -0,696264985 |
| A_23_P332584  | NM_015237       | KIAA1107       | KIAA1107                                                      | ENST00000370378 | -0,696391273 |
| A_23_P11262   | NM_012151       | F8A1           | coagulation factor VIII-associated 1                          | ENST00000369445 | -0,69644853  |
| A_23_P11262   | NM_012151       | F8A1           | coagulation factor VIII-associated 1                          | ENST00000369445 | -0,69659583  |
| A_23_P114164  | NM_013444       | UBQLN2         | ubiquilin 2                                                   | ENST00000338222 | -0,696668315 |
| A_23_P201248  | NM_052934       | SLC26A9        | solute carrier family 26, member 9                            | ENST00000367134 | -0,696710936 |
| A_33_P3269109 | NM_001130686    | GUCY1A3        | guanylate cyclase 1, soluble, alpha 3                         | ENST00000512983 | -0,696896304 |
| A_23_P500130  | NM_153186       | KANK1          | KN motif and ankyrin repeat domains 1                         | ENST00000382289 | -0,696903411 |
| A_23_P12082   | NM_001025199    | CHI3L2         | chitinase 3-like 2                                            | ENST00000369748 | -0,696907533 |
| A_23_P47704   | NM_003355       | UCP2           | uncoupling protein 2 (mitochondrial, proton carrier)          | ENST00000310473 | -0,69693129  |
| A_23_P321846  | NM_002251       | KCNS1          | potassium voltage-gated channel, delayed-rectifier, subfam    | ENST00000306117 | -0,696933709 |
| A_24_P237486  | NM_004992       | MECP2          | methyl CpG binding protein 2 (Rett syndrome)                  | ENST00000545451 | -0,697138214 |

|               |                |              |                                                       |                 |              |
|---------------|----------------|--------------|-------------------------------------------------------|-----------------|--------------|
| A_24_P98249   | NM_006283      | TACC1        | transforming, acidic coiled-coil containing protein 1 | ENST00000443388 | -0,697361957 |
| A_23_P118254  | NM_001451      | FOXF1        | forkhead box F1                                       | ENST00000262426 | -0,697781285 |
| A_23_P110212  | NM_001995      | ACSL1        | acyl-CoA synthetase long-chain family member 1        | ENST00000281455 | -0,697999348 |
| A_21_P0005189 | XR_108720      | LOC100507642 | uncharacterized LOC100507642                          |                 | -0,698002589 |
| A_23_P401472  | NM_000740      | CHRM3        | cholinergic receptor, muscarinic 3                    | ENST00000255380 | -0,698219567 |
| A_21_P0008383 | TCONS_00022622 | XLOC_010922  |                                                       |                 | -0,698414544 |
| A_23_P119478  | NM_005755      | EBI3         | Epstein-Barr virus induced 3                          | ENST00000221847 | -0,698418514 |
| A_32_P94722   | NM_052893      | BTBD9        | BTB (POZ) domain containing 9                         | ENST00000481247 | -0,698739568 |
| A_21_P0014444 | XR_109837      | LOC100507639 | uncharacterized LOC100507639                          |                 | -0,698776724 |
| A_23_P119478  | NM_005755      | EBI3         | Epstein-Barr virus induced 3                          | ENST00000221847 | -0,699029321 |
| A_23_P357881  | NM_172102      | CD8B         | CD8b molecule                                         | ENST00000416057 | -0,699285654 |
| A_33_P3254320 | NM_005490      | SH2D3A       | SH2 domain containing 3A                              | ENST00000245908 | -0,69983825  |
| A_23_P119478  | NM_005755      | EBI3         | Epstein-Barr virus induced 3                          | ENST00000221847 | -0,699976437 |
| A_33_P3247022 | NM_057749      | CCNE2        | cyclin E2                                             | ENST00000308108 | -0,700014636 |
| A_24_P96403   | NM_001001890   | RUNX1        | runt-related transcription factor 1                   | ENST00000344691 | -0,700247785 |
| A_23_P110212  | NM_001995      | ACSL1        | acyl-CoA synthetase long-chain family member 1        | ENST00000281455 | -0,700914746 |
| A_23_P113393  | NM_017413      | APLN         | apelin                                                | ENST00000307484 | -0,701126988 |
| A_24_P168760  | NM_004286      | GTPBP1       | GTP binding protein 1                                 | ENST00000216044 | -0,701312226 |
| A_23_P354151  | NM_005546      | ITK          | IL2-inducible T-cell kinase                           | ENST00000519402 | -0,701660328 |
| A_23_P113393  | NM_017413      | APLN         | apelin                                                | ENST00000307484 | -0,701814857 |
| A_23_P120467  | NM_199427      | ZFP64        | zinc finger protein 64 homolog (mouse)                | ENST00000361387 | -0,701951034 |
| A_24_P287043  | NM_006435      | IFITM2       | interferon induced transmembrane protein 2 (1-8D)     | ENST00000527146 | -0,702035586 |
| A_23_P94412   | NM_025239      | PDCD1LG2     | programmed cell death 1 ligand 2                      | ENST00000397747 | -0,702068245 |
| A_23_P114164  | NM_013444      | UBQLN2       | ubiquilin 2                                           | ENST00000338222 | -0,702155613 |
| A_23_P163455  | NM_002373      | MAP1A        | microtubule-associated protein 1A                     | ENST00000399453 | -0,702294024 |
| A_23_P44724   | NM_001321      | CSRP2        | cysteine and glycine-rich protein 2                   | ENST00000548783 | -0,702345139 |
| A_23_P11262   | NM_012151      | F8A1         | coagulation factor VIII-associated 1                  | ENST00000369445 | -0,702465245 |
| A_23_P110212  | NM_001995      | ACSL1        | acyl-CoA synthetase long-chain family member 1        | ENST00000281455 | -0,702922833 |
| A_23_P3681    | NM_018092      | NETO2        | neuropilin (NRP) and tolloid (TLL)-like 2             | ENST00000303155 | -0,702990747 |



|               |                 |                |                                                                  |                 |              |
|---------------|-----------------|----------------|------------------------------------------------------------------|-----------------|--------------|
| A_23_P11262   | NM_012151       | F8A1           | coagulation factor VIII-associated 1                             | ENST00000369445 | -0,703172876 |
| A_23_P118254  | NM_001451       | FOXF1          | forkhead box F1                                                  | ENST00000262426 | -0,703365311 |
| A_33_P3210059 | NM_005877       | SF3A1          | splicing factor 3a, subunit 1, 120kDa                            | ENST00000439242 | -0,703458757 |
| A_23_P105465  | NM_004072       | CMKLR1         | chemokine-like receptor 1                                        | ENST00000550402 | -0,703909342 |
| A_23_P63281   | NM_001029885    | GLTPD1         | glycolipid transfer protein domain containing 1                  | ENST00000343938 | -0,704062066 |
| A_21_P0014847 | XR_132718       | LOC100506802   | uncharacterized LOC100506802                                     |                 | -0,704064996 |
| A_23_P119337  | NM_012068       | ATF5           | activating transcription factor 5                                | ENST00000423777 | -0,704087736 |
| A_24_P344711  | NM_020132       | AGPAT3         | 1-acylglycerol-3-phosphate O-acyltransferase 3                   | ENST00000398058 | -0,70426168  |
| A_33_P3262012 | ENST00000373891 | CHPF           | chondroitin polymerizing factor                                  | ENST00000373891 | -0,704292115 |
| A_23_P337934  | NM_017556       | FBLIM1         | filamin binding LIM protein 1                                    | ENST00000400773 | -0,704415804 |
| A_23_P110212  | NM_001995       | ACSL1          | acyl-CoA synthetase long-chain family member 1                   | ENST00000281455 | -0,704655055 |
| A_33_P3227857 | NM_173827       | COX18          | COX18 cytochrome c oxidase assembly homolog (S. cerevisiae)      |                 | -0,704901448 |
| A_23_P369815  | NM_000639       | FASLG          | Fas ligand (TNF superfamily, member 6)                           | ENST00000367721 | -0,705019071 |
| A_33_P3211432 | NM_000265       | NCF1           | neutrophil cytosolic factor 1                                    | ENST00000289473 | -0,705123808 |
| A_24_P385313  | NM_002840       | PTPRF          | protein tyrosine phosphatase, receptor type, F                   | ENST00000359947 | -0,705304479 |
| A_23_P110212  | NM_001995       | ACSL1          | acyl-CoA synthetase long-chain family member 1                   | ENST00000281455 | -0,70557754  |
| A_33_P3736195 | BX647230        | DKFZp686M1130  | uncharacterized LOC399832                                        |                 | -0,705727203 |
| A_23_P17065   | NM_004591       | CCL20          | chemokine (C-C motif) ligand 20                                  | ENST00000473642 | -0,70584538  |
| A_21_P0010882 | ENST00000443523 | XLOC_l2_001986 |                                                                  | ENST00000443523 | -0,706172254 |
| A_24_P82466   | NM_201433       | GAS7           | growth arrest-specific 7                                         | ENST00000323816 | -0,706292184 |
| A_24_P85775   | NM_001039477    | C1orf38        | chromosome 1 open reading frame 38                               | ENST00000373927 | -0,706498805 |
| A_33_P3222892 | NM_019848       | SLC10A3        | solute carrier family 10 (sodium/bile acid cotransporter family) | ENST00000393587 | -0,706584388 |
| A_33_P3284939 | NM_199129       | TMEM189        | transmembrane protein 189                                        | ENST00000371652 | -0,706642971 |
| A_33_P3489646 | NM_001080547    | SPI1           | spleen focus forming virus (SFFV) proviral integration oncogene  | ENST00000227163 | -0,706666586 |
| A_32_P88262   | NM_020949       | SLC7A14        | solute carrier family 7 (orphan transporter), member 14          |                 | -0,706692792 |
| A_33_P3264895 | NM_144593       | RHEBL1         | Ras homolog enriched in brain like 1                             | ENST00000420065 | -0,706936692 |
| A_23_P118254  | NM_001451       | FOXF1          | forkhead box F1                                                  | ENST00000262426 | -0,706975728 |
| A_23_P151294  | NM_000619       | IFNG           | interferon, gamma                                                | ENST00000229135 | -0,707064866 |
| A_21_P0000620 | NR_033997       | LOC386597      | uncharacterized LOC386597                                        |                 | -0,707095226 |

|               |                 |              |                                                               |                 |              |
|---------------|-----------------|--------------|---------------------------------------------------------------|-----------------|--------------|
| A_23_P133408  | NM_000758       | CSF2         | colony stimulating factor 2 (granulocyte-macrophage)          | ENST00000296871 | -0,707223158 |
| A_23_P382240  | NM_178505       | TMEM26       | transmembrane protein 26                                      | ENST00000399293 | -0,707459372 |
| A_24_P945181  | NM_013286       | RBM15B       | RNA binding motif protein 15B                                 | ENST00000323686 | -0,707758092 |
| A_23_P110212  | NM_001995       | ACSL1        | acyl-CoA synthetase long-chain family member 1                | ENST00000281455 | -0,708033147 |
| A_23_P19673   | NM_005627       | SGK1         | serum/glucocorticoid regulated kinase 1                       | ENST00000367857 | -0,708442245 |
| A_23_P110212  | NM_001995       | ACSL1        | acyl-CoA synthetase long-chain family member 1                | ENST00000281455 | -0,708732663 |
| A_23_P107454  | NM_031958       | KRTAP3-1     | keratin associated protein 3-1                                | ENST00000391588 | -0,709146819 |
| A_21_P0006517 | THC2671943      | XLOC_008072  |                                                               |                 | -0,709223481 |
| A_23_P416434  | NM_015288       | PHF15        | PHD finger protein 15                                         | ENST00000395003 | -0,709386299 |
| A_23_P122508  | NM_080870       | DPCR1        | diffuse panbronchiolitis critical region 1                    | ENST00000414703 | -0,709515738 |
| A_23_P101246  | NM_001163922    | VSIG10L      | V-set and immunoglobulin domain containing 10 like            | ENST00000335624 | -0,709813673 |
| A_33_P3398331 | NM_006690       | MMP24        | matrix metalloproteinase 24 (membrane-inserted)               | ENST00000246186 | -0,709958647 |
| A_23_P119337  | NM_012068       | ATF5         | activating transcription factor 5                             | ENST00000423777 | -0,710123228 |
| A_23_P147431  | NM_002350       | LYN          | v-src-1 Yamaguchi sarcoma viral related oncogene homolog      | ENST00000519728 | -0,710132368 |
| A_23_P110212  | NM_001995       | ACSL1        | acyl-CoA synthetase long-chain family member 1                | ENST00000281455 | -0,710135608 |
| A_24_P193592  | NM_001761       | CCNF         | cyclin F                                                      | ENST00000293968 | -0,710212351 |
| A_23_P119478  | NM_005755       | EBI3         | Epstein-Barr virus induced 3                                  | ENST00000221847 | -0,71032775  |
| A_23_P10025   | NM_006159       | NELL2        | NEL-like 2 (chicken)                                          | ENST00000437801 | -0,710426716 |
| A_33_P3316068 | ENST00000380313 | CA5B         | carbonic anhydrase VB, mitochondrial                          | ENST00000380313 | -0,710452558 |
| A_23_P423237  | NM_000231       | SGCG         | sarcoglycan, gamma (35kDa dystrophin-associated glycoprotein) | ENST00000537476 | -0,710538801 |
| A_23_P11262   | NM_012151       | F8A1         | coagulation factor VIII-associated 1                          | ENST00000369445 | -0,71070493  |
| A_23_P110212  | NM_001995       | ACSL1        | acyl-CoA synthetase long-chain family member 1                | ENST00000281455 | -0,710718606 |
| A_23_P421011  | NM_030929       | KAZALD1      | Kazal-type serine peptidase inhibitor domain 1                | ENST00000370200 | -0,711129263 |
| A_23_P121480  | NM_001004196    | CD200        | CD200 molecule                                                | ENST00000478595 | -0,711332054 |
| A_23_P36825   | NM_003979       | GPRC5A       | G protein-coupled receptor, family C, group 5, member A       | ENST00000542056 | -0,711359036 |
| A_23_P160214  | NM_001080494    | TTC39A       | tetratricopeptide repeat domain 39A                           | ENST00000451380 | -0,711431928 |
| A_33_P3343220 | NM_001029885    | GLTPD1       | glycolipid transfer protein domain containing 1               | ENST00000343938 | -0,71147047  |
| A_32_P56249   | NR_038996       | LOC100131733 | uncharacterized LOC100131733                                  | ENST00000478808 | -0,711581081 |
| A_23_P131990  | NM_014588       | VSX1         | visual system homeobox 1                                      | ENST00000557285 | -0,711660713 |

|                |                 |             |                                                                       |                 |              |
|----------------|-----------------|-------------|-----------------------------------------------------------------------|-----------------|--------------|
| A_23_P215214   | NM_022458       | LMBR1       | limb region 1 homolog (mouse)                                         | ENST00000353442 | -0,711700455 |
| A_23_P114164   | NM_013444       | UBQLN2      | ubiquilin 2                                                           | ENST00000338222 | -0,711975303 |
| A_33_P3224803  | NM_000265       | NCF1        | neutrophil cytosolic factor 1                                         | ENST00000438106 | -0,712050525 |
| A_21_P0001688  | TCONS_00002073  | XLOC_000264 |                                                                       |                 | -0,712568421 |
| A_24_P150486   | NM_004863       | SPTLC2      | serine palmitoyltransferase, long chain base subunit 2                | ENST00000216484 | -0,712572955 |
| A_23_P101246   | NM_001163922    | VSIG10L     | V-set and immunoglobulin domain containing 10 like                    | ENST00000335624 | -0,712597108 |
| A_33_P3419865  | XR_112726       | LOC646719   | uncharacterized LOC646719                                             |                 | -0,712648544 |
| A_23_P111311   | NM_144497       | AKAP12      | A kinase (PRKA) anchor protein 12                                     | ENST00000253332 | -0,712653942 |
| A_23_P117782   | NM_018357       | LARP6       | La ribonucleoprotein domain family, member 6                          | ENST00000299213 | -0,712679324 |
| A_33_P3236030  | ENST00000509709 | ARHGAP24    | Rho GTPase activating protein 24                                      | ENST00000509709 | -0,712689074 |
| A_23_P11262    | NM_012151       | F8A1        | coagulation factor VIII-associated 1                                  | ENST00000369445 | -0,712850646 |
| A_33_P3236813  | NM_006143       | GPR19       | G protein-coupled receptor 19                                         | ENST00000332427 | -0,713591541 |
| A_23_P37910    | NM_002746       | MAPK3       | mitogen-activated protein kinase 3                                    | ENST00000395202 | -0,71370817  |
| A_33_P3376636  | NM_001017989    | OPA3        | optic atrophy 3 (autosomal recessive, with chorea and spas            | ENST00000323060 | -0,713792517 |
| A_23_P26954    | NM_006373       | VAT1        | vesicle amine transport protein 1 homolog (T. californica)            | ENST00000542468 | -0,71381108  |
| A_33_P3734378  | NR_027118       | LOC285954   | uncharacterized LOC285954                                             | ENST00000415848 | -0,713903455 |
| A_33_P3360072  | NM_001161429    | RANBP3L     | RAN binding protein 3-like                                            | ENST00000296604 | -0,71393655  |
| A_23_P102017   | NM_020711       | ERMN        | ermin, ERM-like protein                                               | ENST00000397283 | -0,713991899 |
| A_19_P00322939 | NR_003367       | PVT1        |                                                                       |                 | -0,714803777 |
| A_23_P113111   | NM_000044       | AR          | androgen receptor                                                     | ENST00000544984 | -0,714892257 |
| A_33_P3314356  | ENST00000315194 | PPM1K       | protein phosphatase, Mg <sup>2+</sup> /Mn <sup>2+</sup> dependent, 1K | ENST00000315194 | -0,714939793 |
| A_33_P3378051  | NM_178123       | SESTD1      | SEC14 and spectrin domains 1                                          |                 | -0,715410177 |
| A_32_P231568   | NM_152573       | RASEF       | RAS and EF-hand domain containing                                     | ENST00000376447 | -0,715629794 |
| A_24_P64653    | NM_152637       | METTL7B     | methyltransferase like 7B                                             | ENST00000394252 | -0,715854212 |
| A_23_P120467   | NM_199427       | ZFP64       | zinc finger protein 64 homolog (mouse)                                | ENST00000361387 | -0,716039692 |
| A_23_P209978   | NM_003385       | VSNL1       | visinin-like 1                                                        | ENST00000404666 | -0,716219176 |
| A_23_P103511   | NM_001085375    | C1orf226    | chromosome 1 open reading frame 226                                   | ENST00000458626 | -0,71653444  |
| A_23_P147431   | NM_002350       | LYN         | v-yes-1 Yamaguchi sarcoma viral related oncogene homolog              | ENST00000519728 | -0,716815368 |
| A_23_P345799   | NM_173544       | FAM129C     | family with sequence similarity 129, member C                         | ENST00000332386 | -0,717163769 |

|               |                 |           |                                                              |                 |              |
|---------------|-----------------|-----------|--------------------------------------------------------------|-----------------|--------------|
| A_33_P3223990 | NM_152263       | TPM3      | tropomyosin 3                                                |                 | -0,717520374 |
| A_23_P256470  | NM_000905       | NPY       | neuropeptide Y                                               | ENST00000407573 | -0,717533005 |
| A_33_P3348782 | NM_030622       | CYP2S1    | cytochrome P450, family 2, subfamily S, polypeptide 1        | ENST00000301173 | -0,717788673 |
| A_23_P109913  | NM_006564       | CXCR6     | chemokine (C-X-C motif) receptor 6                           | ENST00000438735 | -0,717859164 |
| A_23_P147431  | NM_002350       | LYN       | v-yes-1 Yamaguchi sarcoma viral related oncogene homolog     | ENST00000519728 | -0,717872015 |
| A_23_P21560   | NM_030797       | FAM49A    | family with sequence similarity 49, member A                 | ENST00000406434 | -0,717943367 |
| A_23_P56559   | NM_005771       | DHRS9     | dehydrogenase/reductase (SDR family) member 9                | ENST00000432060 | -0,718107066 |
| A_33_P3267208 | NM_022048       | CSNK1G1   | casein kinase 1, gamma 1                                     | ENST00000303052 | -0,71833152  |
| A_23_P119478  | NM_005755       | EBI3      | Epstein-Barr virus induced 3                                 | ENST00000221847 | -0,718621749 |
| A_24_P144303  | NR_024608       | LOC442459 | X-ray repair complementing defective repair pseudogene       |                 | -0,718734681 |
| A_33_P3303810 | NM_005558       | LAD1      | ladinin 1                                                    | ENST00000367313 | -0,718871784 |
| A_23_P208674  | NM_175063       | C19orf63  | chromosome 19 open reading frame 63                          | ENST00000376918 | -0,718923253 |
| A_33_P3390778 | NM_025058       | TRIM46    | tripartite motif containing 46                               | ENST00000392451 | -0,719016283 |
| A_23_P147431  | NM_002350       | LYN       | v-yes-1 Yamaguchi sarcoma viral related oncogene homolog     | ENST00000519728 | -0,719193068 |
| A_23_P369815  | NM_000639       | FASLG     | Fas ligand (TNF superfamily, member 6)                       | ENST00000367721 | -0,719281325 |
| A_24_P7594    | NM_030641       | APOL6     | apolipoprotein L, 6                                          |                 | -0,720535264 |
| A_33_P3362296 | ENST00000396017 | KCNG1     | potassium voltage-gated channel, subfamily G, member 1       | ENST00000396017 | -0,720874928 |
| A_23_P119337  | NM_012068       | ATF5      | activating transcription factor 5                            | ENST00000423777 | -0,720923285 |
| A_23_P256413  | NM_138410       | CMTM7     | CKLF-like MARVEL transmembrane domain containing 7           | ENST00000464689 | -0,72092724  |
| A_23_P161686  | NM_014715       | ARHGAP32  | Rho GTPase activating protein 32                             | ENST00000526162 | -0,720945402 |
| A_23_P140373  | NM_017791       | FLVCR2    | feline leukemia virus subgroup C cellular receptor family, m | ENST00000238667 | -0,721526705 |
| A_21_P0013163 | NR_024045       | RAET1K    | retinoic acid early transcript 1K pseudogene                 | ENST00000533735 | -0,722007698 |
| A_23_P147431  | NM_002350       | LYN       | v-yes-1 Yamaguchi sarcoma viral related oncogene homolog     | ENST00000519728 | -0,722564434 |
| A_33_P3212804 | NM_001010859    | C22orf42  | chromosome 22 open reading frame 42                          | ENST00000467813 | -0,722608727 |
| A_33_P3585268 | NM_002070       | GNAI2     | guanine nucleotide binding protein (G protein), alpha inhibi | ENST00000490122 | -0,722777756 |
| A_33_P3256317 | NR_024468       | LOC730811 | uncharacterized LOC730811                                    | ENST00000448106 | -0,722781513 |
| A_23_P147431  | NM_002350       | LYN       | v-yes-1 Yamaguchi sarcoma viral related oncogene homolog     | ENST00000519728 | -0,723064482 |
| A_23_P147431  | NM_002350       | LYN       | v-yes-1 Yamaguchi sarcoma viral related oncogene homolog     | ENST00000519728 | -0,723352554 |
| A_23_P74290   | NM_052942       | GBP5      | guanylate binding protein 5                                  | ENST00000490568 | -0,723835263 |

|                |                 |              |                                                           |                 |              |
|----------------|-----------------|--------------|-----------------------------------------------------------|-----------------|--------------|
| A_23_P59654    | NM_022150       | NPVF         | neuropeptide VF precursor                                 | ENST00000222674 | -0,724212629 |
| A_23_P109913   | NM_006564       | CXCR6        | chemokine (C-X-C motif) receptor 6                        | ENST00000438735 | -0,724341417 |
| A_23_P119478   | NM_005755       | EBI3         | Epstein-Barr virus induced 3                              | ENST00000221847 | -0,724412649 |
| A_21_P0009504  | TCONS_00026374  | XLOC_012725  |                                                           |                 | -0,724791334 |
| A_23_P133474   | NM_002084       | GPX3         | glutathione peroxidase 3 (plasma)                         | ENST00000458211 | -0,72509307  |
| A_23_P105465   | NM_004072       | CMKLR1       | chemokine-like receptor 1                                 | ENST00000550402 | -0,725141053 |
| A_23_P113471   | NM_174912       | FAAH2        | fatty acid amide hydrolase 2                              | ENST00000491179 | -0,7251511   |
| A_23_P110212   | NM_001995       | ACSL1        | acyl-CoA synthetase long-chain family member 1            | ENST00000281455 | -0,725740091 |
| A_23_P48414    | NM_003914       | CCNA1        | cyclin A1                                                 | ENST00000418263 | -0,726452666 |
| A_33_P3309621  | NR_002804       | SIGLECP3     | sialic acid binding Ig-like lectin, pseudogene 3          | ENST00000341811 | -0,726501211 |
| A_23_P119478   | NM_005755       | EBI3         | Epstein-Barr virus induced 3                              | ENST00000221847 | -0,726632637 |
| A_21_P0003301  | TCONS_00007281  | XLOC_003284  |                                                           |                 | -0,726706292 |
| A_23_P102017   | NM_020711       | ERMN         | ermin, ERM-like protein                                   | ENST00000397283 | -0,726945089 |
| A_24_P941359   | NM_014722       | FAM65B       | family with sequence similarity 65, member B              | ENST00000259698 | -0,727150426 |
| A_33_P3289621  | AK090602        | LOC283143    | uncharacterized LOC283143                                 |                 | -0,727570205 |
| A_24_P204043   | NM_014345       | ZNF318       | zinc finger protein 318                                   | ENST00000318149 | -0,727674358 |
| A_21_P0009825  | ENST00000449270 | XLOC_013457  |                                                           | ENST00000449270 | -0,728509057 |
| A_23_P147431   | NM_002350       | LYN          | v-yes-1 Yamaguchi sarcoma viral related oncogene homolog  | ENST00000519728 | -0,728802204 |
| A_21_P0002907  | ENST00000441185 | XLOC_003327  |                                                           | ENST00000441185 | -0,728886484 |
| A_23_P208493   | NM_005874       | LILRB2       | leukocyte immunoglobulin-like receptor, subfamily B (with | ENST00000434421 | -0,72897779  |
| A_33_P3241021  | ENST00000416624 | CD69         | CD69 molecule                                             | ENST00000416624 | -0,729022383 |
| A_23_P147431   | NM_002350       | LYN          | v-yes-1 Yamaguchi sarcoma viral related oncogene homolog  | ENST00000519728 | -0,729198145 |
| A_19_P00317759 | EU250746        | XLOC_000515  |                                                           |                 | -0,729710628 |
| A_23_P427703   | NR_001447       | MT1L         | metallothionein 1L (gene/pseudogene)                      |                 | -0,729746202 |
| A_23_P209700   | NM_006056       | NMUR1        | neuromedin U receptor 1                                   | ENST00000305141 | -0,729788375 |
| A_23_P117782   | NM_018357       | LARP6        | La ribonucleoprotein domain family, member 6              | ENST00000299213 | -0,729862788 |
| A_21_P0011409  | AK125393        | LOC100505648 | uncharacterized LOC100505648                              |                 | -0,729960039 |
| A_24_P117410   | NM_138433       | KLHDC7B      | kelch domain containing 7B                                | ENST00000395676 | -0,73016868  |
| A_23_P85240    | NM_016562       | TLR7         | toll-like receptor 7                                      | ENST00000380659 | -0,730262725 |



|                |                  |                |                                                              |                 |              |
|----------------|------------------|----------------|--------------------------------------------------------------|-----------------|--------------|
| A_33_P3307163  | NM_001134363     | RBM20          | RNA binding motif protein 20                                 | ENST00000369519 | -0,730652424 |
| A_33_P3400374  | NM_001037335     | PRIC285        | peroxisomal proliferator-activated receptor A interacting co | ENST00000427522 | -0,73156479  |
| A_23_P319572   | NM_001077482     | NR1I3          | nuclear receptor subfamily 1, group I, member 3              | ENST00000367979 | -0,73171448  |
| A_21_P0012418  | TCONS_I2_0001904 | XLOC_I2_010029 |                                                              |                 | -0,73182706  |
| A_21_P0007460  | ENST00000534757  | XLOC_009399    |                                                              | ENST00000534757 | -0,731829229 |
| A_23_P120467   | NM_199427        | ZFP64          | zinc finger protein 64 homolog (mouse)                       | ENST00000361387 | -0,731985868 |
| A_32_P195065   | NM_004263        | SEMA4F         | sema domain, immunoglobulin domain (Ig), transmembran        | ENST00000357877 | -0,732216771 |
| A_23_P354288   | NM_153606        | FAM71A         | family with sequence similarity 71, member A                 | ENST00000545975 | -0,732248495 |
| A_23_P68031    | NM_003151        | STAT4          | signal transducer and activator of transcription 4           | ENST00000392320 | -0,732445864 |
| A_23_P10025    | NM_006159        | NELL2          | NEL-like 2 (chicken)                                         | ENST00000437801 | -0,732455421 |
| A_33_P3237393  | NM_003440        | ZNF140         | zinc finger protein 140                                      |                 | -0,732514052 |
| A_19_P00315506 | NM_001162893     | KIAA0040       |                                                              |                 | -0,732801502 |
| A_19_P00806771 | XR_132670        | LOC100652730   | uncharacterized LOC100652730                                 | ENST00000412500 | -0,732886591 |
| A_23_P147431   | NM_002350        | LYN            | v-yes-1 Yamaguchi sarcoma viral related oncogene homolog     | ENST00000519728 | -0,733022793 |
| A_23_P23639    | NM_153259        | MCOLN2         | mucolipin 2                                                  | ENST00000530971 | -0,733844877 |
| A_21_P0014212  | XR_108878        | LOC100506910   | uncharacterized LOC100506910                                 |                 | -0,734011902 |
| A_24_P829183   | XR_108575        | FLJ32255       | uncharacterized LOC643977                                    |                 | -0,734030855 |
| A_23_P31721    | NM_001951        | E2F5           | E2F transcription factor 5, p130-binding                     | ENST00000517476 | -0,73420952  |
| A_23_P119478   | NM_005755        | EBI3           | Epstein-Barr virus induced 3                                 | ENST00000221847 | -0,734273304 |
| A_23_P119478   | NM_005755        | EBI3           | Epstein-Barr virus induced 3                                 | ENST00000221847 | -0,734369062 |
| A_23_P50928    | NM_182528        | C1QL2          | complement component 1, q subcomponent-like 2                | ENST00000272520 | -0,734488225 |
| A_33_P3262977  | NM_001079858     | GPR64          | G protein-coupled receptor 64                                | ENST00000397917 | -0,73453828  |
| A_33_P3384871  | NM_001142522     | FBXO5          | F-box protein 5                                              | ENST00000477822 | -0,734574047 |
| A_23_P151294   | NM_000619        | IFNG           | interferon, gamma                                            | ENST00000229135 | -0,734791182 |
| A_33_P3375934  | NM_005746        | NAMPT          | nicotinamide phosphoribosyltransferase                       | ENST00000222553 | -0,734808037 |
| A_33_P3253687  | NR_003945        | GVINP1         | GTPase, very large interferon inducible pseudogene 1         |                 | -0,734824706 |
| A_24_P941866   | AK096941         | C5orf56        | chromosome 5 open reading frame 56                           | ENST00000337752 | -0,735207701 |
| A_24_P237443   | NM_018990        | SASH3          | SAM and SH3 domain containing 3                              | ENST00000356892 | -0,735380867 |
| A_21_P0001304  | TCONS_00000954   | XLOC_000213    |                                                              |                 | -0,735460604 |

|               |                 |                |                                                        |                 |              |
|---------------|-----------------|----------------|--------------------------------------------------------|-----------------|--------------|
| A_33_P3266928 | NM_001080434    | LMTK3          | lemur tyrosine kinase 3                                | ENST00000270238 | -0,735709053 |
| A_33_P3323188 | NR_027237       | LOC728743      | zinc finger protein pseudogene                         | ENST00000476489 | -0,735750056 |
| A_23_P21495   | NM_003890       | FCGBP          | Fc fragment of IgG binding protein                     | ENST00000221347 | -0,735955233 |
| A_33_P3245631 | NM_001080494    | TTC39A         | tetratricopeptide repeat domain 39A                    | ENST00000524442 | -0,736210474 |
| A_33_P3242453 | NR_003948       | HCG22          | HLA complex group 22 (non-protein coding)              | ENST00000412408 | -0,737454116 |
| A_33_P3307049 | AK128478        | LOC100129363   | uncharacterized LOC100129363                           |                 | -0,737531433 |
| A_23_P151598  | NM_006032       | CPNE6          | copine VI (neuronal)                                   | ENST00000537691 | -0,737592526 |
| A_23_P101246  | NM_001163922    | VSIG10L        | V-set and immunoglobulin domain containing 10 like     | ENST00000335624 | -0,737973704 |
| A_33_P3290562 | NM_000168       | GLI3           | GLI family zinc finger 3                               | ENST00000395925 | -0,737983758 |
| A_23_P302568  | NM_003459       | SLC30A3        | solute carrier family 30 (zinc transporter), member 3  | ENST00000233535 | -0,73811687  |
| A_24_P319374  | NM_005814       | GPA33          | glycoprotein A33 (transmembrane)                       | ENST00000367868 | -0,738276306 |
| A_32_P133840  | NM_014858       | TMCC2          | transmembrane and coiled-coil domain family 2          | ENST00000358024 | -0,738292581 |
| A_23_P352266  | NM_000633       | BCL2           | B-cell CLL/lymphoma 2                                  | ENST00000398117 | -0,73913162  |
| A_23_P10025   | NM_006159       | NELL2          | NEL-like 2 (chicken)                                   | ENST00000437801 | -0,740006405 |
| A_23_P119337  | NM_012068       | ATF5           | activating transcription factor 5                      | ENST00000423777 | -0,740553592 |
| A_32_P902988  | NM_002379       | MATN1          | matrilin 1, cartilage matrix protein                   | ENST00000373765 | -0,74077672  |
| A_21_P0011495 | NR_034090       | DDX11L9        | DEAD/H (Asp-Glu-Ala-Asp/His) box polypeptide 11 like 9 | ENST00000456328 | -0,741200715 |
| A_23_P119337  | NM_012068       | ATF5           | activating transcription factor 5                      | ENST00000423777 | -0,74184983  |
| A_33_P3400943 | NM_001199054    | C16orf5        | chromosome 16 open reading frame 5                     | ENST00000399599 | -0,741856048 |
| A_23_P436284  | NM_178859       | OSTBETA        | organic solute transporter beta                        | ENST00000334287 | -0,742395246 |
| A_23_P106661  | NM_052999       | CMTM1          | CKLF-like MARVEL transmembrane domain containing 1     | ENST00000379490 | -0,742396958 |
| A_21_P0004325 | TCONS_00010162  | XLOC_004625    |                                                        |                 | -0,742455028 |
| A_23_P113111  | NM_000044       | AR             | androgen receptor                                      | ENST00000544984 | -0,742682632 |
| A_33_P3359084 | ENST00000339381 | TAS1R3         | taste receptor, type 1, member 3                       | ENST00000339381 | -0,742866311 |
| A_21_P0013512 | THC2568453      | XLOC_I2_014504 |                                                        |                 | -0,743128099 |
| A_21_P0007793 | THC2684861      | XLOC_010251    |                                                        |                 | -0,743423595 |
| A_23_P24903   | NM_176072       | P2RY2          | purinergic receptor P2Y, G-protein coupled, 2          | ENST00000393597 | -0,744081755 |
| A_23_P335452  | NM_153367       | ZCCHC24        | zinc finger, CCHC domain containing 24                 | ENST00000372336 | -0,744132931 |
| A_23_P104762  | NM_006106       | YAP1           | Yes-associated protein 1                               | ENST00000531439 | -0,744256453 |

|               |                  |                |                                                                |                 |              |
|---------------|------------------|----------------|----------------------------------------------------------------|-----------------|--------------|
| A_33_P3211213 | NM_024075        | TSEN34         | tRNA splicing endonuclease 34 homolog ( <i>S. cerevisiae</i> ) | ENST00000496583 | -0,744884654 |
| A_33_P3253394 | NM_002287        | LAIR1          | leukocyte-associated immunoglobulin-like receptor 1            |                 | -0,745166971 |
| A_33_P3251776 | NM_001142777     | HSD3B7         | hydroxy-delta-5-steroid dehydrogenase, 3 beta- and steroid     | ENST00000262520 | -0,745313679 |
| A_23_P105465  | NM_004072        | CMKLR1         | chemokine-like receptor 1                                      | ENST00000550402 | -0,746504276 |
| A_23_P49546   | NM_000835        | GRIN2C         | glutamate receptor, ionotropic, N-methyl D-aspartate 2C        | ENST00000293190 | -0,746791506 |
| A_23_P137366  | NM_000491        | C1QB           | complement component 1, q subcomponent, B chain                | ENST00000314933 | -0,747400151 |
| A_23_P121480  | NM_001004196     | CD200          | CD200 molecule                                                 | ENST00000478595 | -0,748147036 |
| A_24_P384029  | XR_132490        | LOC100130171   | hematological and neurological expressed 1 pseudogene          |                 | -0,74855111  |
| A_21_P0010536 | NM_018284        | GBP3           | guanylate binding protein 3                                    | ENST00000461384 | -0,748609537 |
| A_23_P45087   | NM_016220        | ZNF107         | zinc finger protein 107                                        | ENST00000423627 | -0,749319515 |
| A_23_P500381  | NM_019859        | HTR7           | 5-hydroxytryptamine (serotonin) receptor 7 (adenylate cycl     | ENST00000336152 | -0,749420137 |
| A_33_P3236881 | NM_001204088     | C1orf151-NBL1  | C1orf151-NBL1 readthrough                                      | ENST00000375136 | -0,749709612 |
| A_23_P304171  | NM_001145642     | KIAA0226       | KIAA0226                                                       | ENST00000273582 | -0,74983247  |
| A_21_P0013514 | TCONS_I2_0002818 | XLOC_I2_014504 |                                                                |                 | -0,750501428 |
| A_23_P120002  | NM_004510        | SP110          | SP110 nuclear body protein                                     | ENST00000338556 | -0,750902539 |
| A_23_P100711  | NM_000304        | PMP22          | peripheral myelin protein 22                                   | ENST00000312280 | -0,751004066 |
| A_33_P3334443 | NM_001252271     | FAM69A         | family with sequence similarity 69, member A                   | ENST00000370310 | -0,751087797 |
| A_23_P394064  | NM_012232        | PTRF           | polymerase I and transcript release factor                     | ENST00000357037 | -0,75127338  |
| A_23_P200096  | NM_025106        | SPSB1          | splA/ryanodine receptor domain and SOCS box containing 1       | ENST00000377399 | -0,751529041 |
| A_33_P3274930 | ENST00000395936  | PMP22          | peripheral myelin protein 22                                   | ENST00000395936 | -0,751700185 |
| A_23_P149529  | NM_002353        | TACSTD2        | tumor-associated calcium signal transducer 2                   | ENST00000371225 | -0,752309236 |
| A_23_P47691   | NM_003141        | TRIM21         | tripartite motif containing 21                                 | ENST00000543625 | -0,752367717 |
| A_23_P145175  | NM_014345        | ZNF318         | zinc finger protein 318                                        | ENST00000361428 | -0,752428879 |
| A_23_P149221  | NM_024602        | HECTD3         | HECT domain containing 3                                       | ENST00000372172 | -0,752429144 |
| A_23_P68922   | NM_033386        | MICALL1        | MICAL-like 1                                                   | ENST00000215957 | -0,752572297 |
| A_33_P3298861 | NM_024628        | SLC12A8        | solute carrier family 12 (potassium/chloride transporters), r  | ENST00000314584 | -0,753036717 |
| A_24_P172481  | NM_006074        | TRIM22         | tripartite motif containing 22                                 | ENST00000455293 | -0,753050396 |
| A_24_P104407  | NM_145728        | SYNM           | synemin, intermediate filament protein                         | ENST00000336292 | -0,753178648 |
| A_23_P153372  | NM_032855        | HSH2D          | hematopoietic SH2 domain containing                            | ENST00000253680 | -0,753719305 |

|               |                 |             |                                                        |                 |              |
|---------------|-----------------|-------------|--------------------------------------------------------|-----------------|--------------|
| A_21_P0001233 | ENST00000433058 | XLOC_001230 |                                                        | ENST00000433058 | -0,754382439 |
| A_33_P3336780 | NM_007188       | ABCB8       | ATP-binding cassette, sub-family B (MDR/TAP), member 8 | ENST00000358849 | -0,754449091 |
| A_33_P3242503 | NM_199451       | ZNF365      | zinc finger protein 365                                | ENST00000410046 | -0,754591594 |
| A_23_P111995  | NM_002318       | LOXL2       | lysyl oxidase-like 2                                   | ENST00000389131 | -0,754941214 |
| A_24_P215765  | NM_024490       | ATP10A      | ATPase, class V, type 10A                              | ENST00000555815 | -0,755321028 |
| A_24_P154948  | NM_002047       | GARS        | glycyl-tRNA synthetase                                 | ENST00000470392 | -0,75545417  |
| A_33_P3846177 | NM_001478       | B4GALNT1    | beta-1,4-N-acetyl-galactosaminyl transferase 1         | ENST00000552468 | -0,755614823 |
| A_33_P3329023 | NM_001252273    | FAM69A      | family with sequence similarity 69, member A           | ENST00000401027 | -0,755812851 |
| A_23_P34915   | NM_001040619    | ATF3        | activating transcription factor 3                      | ENST00000366987 | -0,755827531 |
| A_33_P3284394 | AK311219        | CBR1        | carbonyl reductase 1                                   | ENST00000399191 | -0,756118829 |
| A_33_P3284129 | NM_144586       | LYPD1       | LY6/PLAUR domain containing 1                          | ENST00000397463 | -0,756159434 |
| A_33_P3341474 | NM_001080412    | ZBTB38      | zinc finger and BTB domain containing 38               | ENST00000514251 | -0,756267166 |
| A_23_P379475  | NM_014762       | DHCR24      | 24-dehydrocholesterol reductase                        | ENST00000371269 | -0,756586213 |
| A_33_P3222424 | NM_000759       | CSF3        | colony stimulating factor 3 (granulocyte)              | ENST00000394148 | -0,75668394  |
| A_33_P3240353 | NM_017767       | SLC39A4     | solute carrier family 39 (zinc transporter), member 4  | ENST00000276833 | -0,757147619 |
| A_21_P0007856 | TCONS_00021241  | XLOC_009926 |                                                        |                 | -0,757490476 |
| A_23_P251316  | NM_001331       | CTNND1      | catenin (cadherin-associated protein), delta 1         | ENST00000399050 | -0,757727913 |
| A_23_P151075  | NM_001175       | ARHGDI1     | Rho GDP dissociation inhibitor (GDI) beta              | ENST00000228945 | -0,757734493 |
| A_33_P3376264 | ENST00000378938 | GK          | glycerol kinase                                        | ENST00000378938 | -0,758373993 |
| A_24_P378019  | NM_004031       | IRF7        | interferon regulatory factor 7                         | ENST00000534109 | -0,760148635 |
| A_23_P209678  | NM_002664       | PLEK        | pleckstrin                                             | ENST00000234313 | -0,76023359  |
| A_23_P113471  | NM_174912       | FAAH2       | fatty acid amide hydrolase 2                           | ENST00000491179 | -0,760233894 |
| A_23_P312920  | NM_006235       | POU2AF1     | POU class 2 associating factor 1                       | ENST00000393067 | -0,760356384 |
| A_23_P32165   | NM_004789       | LHX2        | LIM homeobox 2                                         | ENST00000373615 | -0,760500261 |
| A_33_P3298990 | NM_014207       | CD5         | CD5 molecule                                           | ENST00000347785 | -0,760603307 |
| A_23_P167468  | NM_000949       | PRLR        | prolactin receptor                                     | ENST00000508107 | -0,760630729 |
| A_23_P502224  | NM_007326       | CYB5R3      | cytochrome b5 reductase 3                              | ENST00000407332 | -0,760749617 |
| A_23_P111132  | NM_005345       | HSPA1A      | heat shock 70kDa protein 1A                            | ENST00000375651 | -0,76080714  |
| A_33_P3371154 | NM_199451       | ZNF365      | zinc finger protein 365                                | ENST00000373784 | -0,760860437 |

|               |                  |                |                                                                |                 |              |
|---------------|------------------|----------------|----------------------------------------------------------------|-----------------|--------------|
| A_23_P153320  | NM_000201        | ICAM1          | intercellular adhesion molecule 1                              | ENST00000264832 | -0,761207849 |
| A_33_P3296181 | NM_001001437     | CCL3L3         | chemokine (C-C motif) ligand 3-like 3                          | ENST00000394484 | -0,761390224 |
| A_23_P404494  | NM_002185        | IL7R           | interleukin 7 receptor                                         | ENST00000343305 | -0,762008683 |
| A_23_P50000   | NM_024792        | FAM57A         | family with sequence similarity 57, member A                   | ENST00000451373 | -0,76220951  |
| A_23_P105465  | NM_004072        | CMKLR1         | chemokine-like receptor 1                                      | ENST00000550402 | -0,762288265 |
| A_23_P106661  | NM_052999        | CMTM1          | CKLF-like MARVEL transmembrane domain containing 1             | ENST00000379490 | -0,76244907  |
| A_23_P87545   | NM_021034        | IFITM3         | interferon induced transmembrane protein 3                     | ENST00000531688 | -0,762539255 |
| A_33_P3412016 | NM_020210        | SEMA4B         | sema domain, immunoglobulin domain (Ig), transmembran          | ENST00000379122 | -0,762888607 |
| A_23_P119337  | NM_012068        | ATF5           | activating transcription factor 5                              | ENST00000423777 | -0,763605325 |
| A_23_P254842  | NM_012080        | HDHD1          | haloacid dehalogenase-like hydrolase domain containing 1       | ENST00000544385 | -0,763703193 |
| A_23_P42746   | NM_000265        | NCF1           | neutrophil cytosolic factor 1                                  | ENST00000289473 | -0,764062735 |
| A_33_P3309561 | NM_001098503     | PTPRJ          | protein tyrosine phosphatase, receptor type, J                 | ENST00000440289 | -0,764180798 |
| A_21_P0005444 | NR_034033        | LOC285972      | uncharacterized LOC285972                                      |                 | -0,764510293 |
| A_23_P352266  | NM_000633        | BCL2           | B-cell CLL/lymphoma 2                                          | ENST00000398117 | -0,765939476 |
| A_33_P3370404 | NM_015368        | PANX1          | pannexin 1                                                     | ENST00000436171 | -0,766327307 |
| A_23_P153320  | NM_000201        | ICAM1          | intercellular adhesion molecule 1                              | ENST00000264832 | -0,766501437 |
| A_23_P14165   | NM_005292        | GPR18          | G protein-coupled receptor 18                                  | ENST00000340807 | -0,766541112 |
| A_23_P72096   | NM_000575        | IL1A           | interleukin 1, alpha                                           | ENST00000263339 | -0,766747922 |
| A_21_P0010978 | AF001893         | NEAT1          | nuclear paraspeckle assembly transcript 1 (non-protein coding) |                 | -0,767403355 |
| A_23_P352266  | NM_000633        | BCL2           | B-cell CLL/lymphoma 2                                          | ENST00000398117 | -0,767428198 |
| A_23_P77918   | NM_006041        | HS3ST3B1       | heparan sulfate (glucosamine) 3-O-sulfotransferase 3B1         | ENST00000360954 | -0,767583098 |
| A_23_P137423  | NM_052868        | IGSF8          | immunoglobulin superfamily, member 8                           | ENST00000358475 | -0,767957812 |
| A_33_P3260430 | NM_005988        | SPRR2A         | small proline-rich protein 2A                                  | ENST00000392653 | -0,768087949 |
| A_23_P100912  | NM_014030        | GIT1           | G protein-coupled receptor kinase interacting ArfGAP 1         | ENST00000394869 | -0,768247992 |
| A_23_P32404   | NM_002201        | ISG20          | interferon stimulated exonuclease gene 20kDa                   | ENST00000546338 | -0,76859581  |
| A_23_P137931  | NM_000677        | ADORA3         | adenosine A3 receptor                                          | ENST00000241356 | -0,768804506 |
| A_23_P122077  | NM_016591        | GCNT4          | glucosaminyl (N-acetyl) transferase 4, core 2                  | ENST00000322348 | -0,768954182 |
| A_24_P297539  | NM_181803        | UBE2C          | ubiquitin-conjugating enzyme E2C                               | ENST00000405520 | -0,769026461 |
| A_21_P0013071 | TCONS_I2_0002467 | XLOC_I2_012925 |                                                                |                 | -0,769639147 |



|                |                 |              |                                                               |                 |              |
|----------------|-----------------|--------------|---------------------------------------------------------------|-----------------|--------------|
| A_23_P24997    | NM_000075       | CDK4         | cyclin-dependent kinase 4                                     | ENST00000552713 | -0,769676152 |
| A_19_P00321761 | ENST00000412979 | XLOC_002310  |                                                               | ENST00000412979 | -0,769724679 |
| A_23_P119337   | NM_012068       | ATF5         | activating transcription factor 5                             | ENST00000423777 | -0,769924831 |
| A_33_P3270485  | NM_014292       | CBX6         | chromobox homolog 6                                           | ENST00000407418 | -0,769926878 |
| A_23_P206901   | NM_017668       | NDE1         | nudE nuclear distribution gene E homolog 1 (A. nidulans)      | ENST00000396355 | -0,770549319 |
| A_23_P361049   | NM_012223       | MYO1B        | myosin IB                                                     | ENST00000439065 | -0,770626635 |
| A_23_P100711   | NM_000304       | PMP22        | peripheral myelin protein 22                                  | ENST00000312280 | -0,770678964 |
| A_24_P122921   | NM_138621       | BCL2L11      | BCL2-like 11 (apoptosis facilitator)                          |                 | -0,771120691 |
| A_23_P38346    | NM_024119       | DHX58        | DEXH (Asp-Glu-X-His) box polypeptide 58                       | ENST00000423748 | -0,771510983 |
| A_24_P128308   | ENST00000469435 | KLF6         | Kruppel-like factor 6                                         | ENST00000469435 | -0,771630539 |
| A_23_P153320   | NM_000201       | ICAM1        | intercellular adhesion molecule 1                             | ENST00000264832 | -0,771677054 |
| A_23_P100711   | NM_000304       | PMP22        | peripheral myelin protein 22                                  | ENST00000312280 | -0,771887626 |
| A_21_P0003320  | BC040914        | XLOC_003738  |                                                               |                 | -0,771984215 |
| A_33_P3242623  | NM_014331       | SLC7A11      | solute carrier family 7 (anionic amino acid transporter light | ENST00000280612 | -0,772428742 |
| A_21_P0014110  | ENST00000478301 | LOC100506673 |                                                               | ENST00000478301 | -0,772542741 |
| A_32_P74955    | NM_152641       | ARID2        | AT rich interactive domain 2 (ARID, RFX-like)                 | ENST00000338636 | -0,772609504 |
| A_23_P27400    | NM_001523       | HAS1         | hyaluronan synthase 1                                         | ENST00000540069 | -0,772887188 |
| A_33_P3313055  | NM_000435       | NOTCH3       | notch 3                                                       | ENST00000263388 | -0,772956949 |
| A_23_P340333   | NM_033397       | ITPRIP       | inositol 1,4,5-trisphosphate receptor interacting protein     | ENST00000358187 | -0,772962798 |
| A_23_P153320   | NM_000201       | ICAM1        | intercellular adhesion molecule 1                             | ENST00000264832 | -0,773078527 |
| A_23_P111132   | NM_005345       | HSPA1A       | heat shock 70kDa protein 1A                                   | ENST00000375651 | -0,773631123 |
| A_19_P00317953 | XR_111691       | LOC100508196 | uncharacterized LOC100508196                                  |                 | -0,773646826 |
| A_33_P3260575  | NM_016174       | CERCAM       | cerebral endothelial cell adhesion molecule                   | ENST00000372842 | -0,775083033 |
| A_21_P0014154  | XR_108621       | LOC100507367 | uncharacterized LOC100507367                                  |                 | -0,775826535 |
| A_23_P72096    | NM_000575       | IL1A         | interleukin 1, alpha                                          | ENST00000263339 | -0,776440294 |
| A_32_P56001    | NM_012072       | CD93         | CD93 molecule                                                 | ENST00000246006 | -0,776497702 |
| A_23_P166686   | NM_016201       | AMOTL2       | angiomin like 2                                               | ENST00000422605 | -0,776643743 |
| A_23_P116653   | NM_138722       | BCL2L14      | BCL2-like 14 (apoptosis facilitator)                          | ENST00000396369 | -0,776929207 |
| A_23_P111132   | NM_005345       | HSPA1A       | heat shock 70kDa protein 1A                                   | ENST00000375651 | -0,778436071 |

|               |                  |                |                                                        |                 |              |
|---------------|------------------|----------------|--------------------------------------------------------|-----------------|--------------|
| A_23_P401084  | NM_174945        | ZNF575         | zinc finger protein 575                                | ENST00000458714 | -0,778619432 |
| A_24_P12435   | NM_181782        | NCOA7          | nuclear receptor coactivator 7                         | ENST00000368357 | -0,778821768 |
| A_23_P113471  | NM_174912        | FAAH2          | fatty acid amide hydrolase 2                           | ENST00000491179 | -0,779360646 |
| A_23_P71530   | NM_002546        | TNFRSF11B      | tumor necrosis factor receptor superfamily, member 11b | ENST00000521597 | -0,779998676 |
| A_33_P3258041 | NM_001037277     | GGPS1          | geranylgeranyl diphosphate synthase 1                  | ENST00000358966 | -0,78025708  |
| A_21_P0013873 | ENST00000427671  | XLOC_I2_015842 |                                                        | ENST00000427671 | -0,780601119 |
| A_32_P30649   | NM_004454        | ETV5           | ets variant 5                                          | ENST00000306376 | -0,780646688 |
| A_21_P0013278 | NR_027237        | LOC728743      | zinc finger protein pseudogene                         | ENST00000476489 | -0,78070673  |
| A_23_P10025   | NM_006159        | NELL2          | NEL-like 2 (chicken)                                   | ENST00000437801 | -0,780910636 |
| A_23_P436526  | NM_178526        | SLC25A42       | solute carrier family 25, member 42                    | ENST00000318596 | -0,781414068 |
| A_21_P0009420 | TCONS_00026175   | XLOC_012586    |                                                        |                 | -0,781801983 |
| A_23_P64611   | NM_176798        | P2RY6          | pyrimidinergic receptor P2Y, G-protein coupled, 6      | ENST00000538328 | -0,781819787 |
| A_24_P161018  | NM_017554        | PARP14         | poly (ADP-ribose) polymerase family, member 14         | ENST00000310290 | -0,782340802 |
| A_23_P153320  | NM_000201        | ICAM1          | intercellular adhesion molecule 1                      | ENST00000264832 | -0,782553888 |
| A_23_P105465  | NM_004072        | CMKLR1         | chemokine-like receptor 1                              | ENST00000550402 | -0,7826884   |
| A_21_P0013475 | TCONS_I2_0002773 | XLOC_I2_014191 |                                                        |                 | -0,782862594 |
| A_33_P3409154 | NM_015482        | SLC22A23       | solute carrier family 22, member 23                    | ENST00000406686 | -0,782982511 |
| A_23_P100711  | NM_000304        | PMP22          | peripheral myelin protein 22                           | ENST00000312280 | -0,782997244 |
| A_33_P3369153 | NM_002254        | KIF3C          | kinesin family member 3C                               |                 | -0,783638132 |
| A_23_P145694  | NM_001673        | ASNS           | asparagine synthetase (glutamine-hydrolyzing)          | ENST00000394308 | -0,78444913  |
| A_23_P257815  | NM_005582        | CD180          | CD180 molecule                                         | ENST00000256447 | -0,784464678 |
| A_23_P9883    | NM_001079821     | NLRP3          | NLR family, pyrin domain containing 3                  | ENST00000336119 | -0,785217531 |
| A_21_P0005649 | TCONS_00014594   | XLOC_006699    |                                                        |                 | -0,78560238  |
| A_33_P3738458 | NM_022648        | TNS1           | tensin 1                                               | ENST00000171887 | -0,786209918 |
| A_23_P19624   | NM_001718        | BMP6           | bone morphogenetic protein 6                           | ENST00000283147 | -0,786362394 |
| A_23_P381017  | NM_152559        | WBSCR27        | Williams Beuren syndrome chromosome region 27          | ENST00000297873 | -0,786373946 |
| A_23_P100711  | NM_000304        | PMP22          | peripheral myelin protein 22                           | ENST00000312280 | -0,786845957 |
| A_23_P64828   | NM_002534        | OAS1           | 2'-5'-oligoadenylate synthetase 1, 40/46kDa            | ENST00000377508 | -0,787869425 |
| A_23_P113471  | NM_174912        | FAAH2          | fatty acid amide hydrolase 2                           | ENST00000491179 | -0,78856111  |

|                |              |          |                                                             |                 |              |
|----------------|--------------|----------|-------------------------------------------------------------|-----------------|--------------|
| A_24_P712562   | NM_001085430 | C17orf67 | chromosome 17 open reading frame 67                         | ENST00000397862 | -0,789152841 |
| A_32_P21246    | NR_026791    | HCG27    | HLA complex group 27 (non-protein coding)                   | ENST00000416551 | -0,789192048 |
| A_23_P119337   | NM_012068    | ATF5     | activating transcription factor 5                           | ENST00000423777 | -0,789288386 |
| A_23_P139704   | NM_001946    | DUSP6    | dual specificity phosphatase 6                              | ENST00000279488 | -0,789387483 |
| A_23_P153320   | NM_000201    | ICAM1    | intercellular adhesion molecule 1                           | ENST00000264832 | -0,789845954 |
| A_33_P3383866  | NM_016381    | TREX1    | three prime repair exonuclease 1                            | ENST00000422277 | -0,79029064  |
| A_33_P3385785  | NM_005621    | S100A12  | S100 calcium binding protein A12                            | ENST00000368736 | -0,790411451 |
| A_23_P72096    | NM_000575    | IL1A     | interleukin 1, alpha                                        | ENST00000263339 | -0,790488784 |
| A_23_P153320   | NM_000201    | ICAM1    | intercellular adhesion molecule 1                           | ENST00000264832 | -0,790890379 |
| A_23_P72096    | NM_000575    | IL1A     | interleukin 1, alpha                                        | ENST00000263339 | -0,791081532 |
| A_23_P72096    | NM_000575    | IL1A     | interleukin 1, alpha                                        | ENST00000263339 | -0,791156798 |
| A_21_P0000629  | NR_034072    | SARS     | seryl-tRNA synthetase                                       |                 | -0,791177933 |
| A_23_P111132   | NM_005345    | HSPA1A   | heat shock 70kDa protein 1A                                 | ENST00000375651 | -0,791224337 |
| A_24_P30194    | NM_012420    | IFIT5    | interferon-induced protein with tetratricopeptide repeats 5 | ENST00000371795 | -0,79175805  |
| A_23_P100711   | NM_000304    | PMP22    | peripheral myelin protein 22                                | ENST00000312280 | -0,791925025 |
| A_23_P111132   | NM_005345    | HSPA1A   | heat shock 70kDa protein 1A                                 | ENST00000375651 | -0,792334202 |
| A_24_P192301   | NM_006080    | SEMA3A   | sema domain, immunoglobulin domain (Ig), short basic don    | ENST00000265362 | -0,792692558 |
| A_23_P8571     | NM_080744    | SRCRB4D  | scavenger receptor cysteine rich domain containing, group   | ENST00000275560 | -0,792745414 |
| A_23_P328621   | NM_145053    | UBQLNL   | ubiquilin-like                                              | ENST00000380184 | -0,793194659 |
| A_23_P99785    | NM_024643    | FAM164C  | family with sequence similarity 164, member C               | ENST00000439583 | -0,793209733 |
| A_19_P00315804 | NR_015375    | FLJ35024 | uncharacterized LOC401491                                   |                 | -0,793293037 |
| A_23_P429478   | NM_153038    | CCDC140  | coiled-coil domain containing 140                           | ENST00000295226 | -0,793371135 |
| A_23_P72096    | NM_000575    | IL1A     | interleukin 1, alpha                                        | ENST00000263339 | -0,79363188  |
| A_33_P3284508  | NM_001174104 | CD14     | CD14 molecule                                               | ENST00000302014 | -0,7941881   |
| A_33_P3305758  | NM_001747    | CAPG     | capping protein (actin filament), gelsolin-like             | ENST00000415012 | -0,79419147  |
| A_23_P111132   | NM_005345    | HSPA1A   | heat shock 70kDa protein 1A                                 | ENST00000375651 | -0,794254238 |
| A_33_P3333820  | NM_017811    | UBE2R2   | ubiquitin-conjugating enzyme E2R 2                          | ENST00000263228 | -0,794348402 |
| A_21_P0000740  | NR_038260    | HIVEP3   | human immunodeficiency virus type I enhancer binding pro    | ENST00000491442 | -0,794434929 |
| A_23_P100711   | NM_000304    | PMP22    | peripheral myelin protein 22                                | ENST00000312280 | -0,794709079 |

|               |                 |              |                                                       |                 |              |
|---------------|-----------------|--------------|-------------------------------------------------------|-----------------|--------------|
| A_23_P111995  | NM_002318       | LOXL2        | lysyl oxidase-like 2                                  | ENST00000389131 | -0,794777093 |
| A_23_P72096   | NM_000575       | IL1A         | interleukin 1, alpha                                  | ENST00000263339 | -0,794983611 |
| A_23_P120883  | NM_002133       | HMOX1        | heme oxygenase (decycling) 1                          | ENST00000216117 | -0,796064864 |
| A_23_P119337  | NM_012068       | ATF5         | activating transcription factor 5                     | ENST00000423777 | -0,796124301 |
| A_21_P0003549 | NR_039975       | LOC100506229 | uncharacterized LOC100506229                          | ENST00000515864 | -0,796582474 |
| A_21_P0007219 | TCONS_00019322  | XLOC_009167  |                                                       |                 | -0,796725913 |
| A_23_P10025   | NM_006159       | NELL2        | NEL-like 2 (chicken)                                  | ENST00000437801 | -0,796751909 |
| A_33_P3411145 | NM_001145191    | FAM200B      | family with sequence similarity 200, member B         | ENST00000504137 | -0,796901434 |
| A_23_P72096   | NM_000575       | IL1A         | interleukin 1, alpha                                  | ENST00000263339 | -0,796909714 |
| A_23_P153320  | NM_000201       | ICAM1        | intercellular adhesion molecule 1                     | ENST00000264832 | -0,796927653 |
| A_23_P100711  | NM_000304       | PMP22        | peripheral myelin protein 22                          | ENST00000312280 | -0,797275831 |
| A_23_P100711  | NM_000304       | PMP22        | peripheral myelin protein 22                          | ENST00000312280 | -0,797572291 |
| A_23_P72096   | NM_000575       | IL1A         | interleukin 1, alpha                                  | ENST00000263339 | -0,797759774 |
| A_23_P153320  | NM_000201       | ICAM1        | intercellular adhesion molecule 1                     | ENST00000264832 | -0,79818183  |
| A_24_P527404  | NM_004329       | BMPR1A       | bone morphogenetic protein receptor, type IA          | ENST00000224764 | -0,798840388 |
| A_23_P81898   | NM_006398       | UBD          | ubiquitin D                                           | ENST00000355973 | -0,798844956 |
| A_23_P327140  | NM_020914       | RNF213       | ring finger protein 213                               | ENST00000411702 | -0,799681346 |
| A_23_P251075  | NM_005491       | MAMLD1       | mastermind-like domain containing 1                   | ENST00000464149 | -0,799783762 |
| A_23_P111132  | NM_005345       | HSPA1A       | heat shock 70kDa protein 1A                           | ENST00000375651 | -0,799836006 |
| A_33_P3318117 | NM_000765       | CYP3A7       | cytochrome P450, family 3, subfamily A, polypeptide 7 | ENST00000292414 | -0,799864089 |
| A_33_P3390057 | NM_014220       | TM4SF1       | transmembrane 4 L six family member 1                 | ENST00000383054 | -0,800011822 |
| A_23_P120467  | NM_199427       | ZFP64        | zinc finger protein 64 homolog (mouse)                | ENST00000361387 | -0,800187853 |
| A_23_P48596   | NM_198232       | RNASE1       | ribonuclease, RNase A family, 1 (pancreatic)          | ENST00000412779 | -0,800430173 |
| A_23_P371076  | ENST00000472022 | KLF12        | Kruppel-like factor 12                                | ENST00000472022 | -0,800607887 |
| A_23_P430842  | NM_023002       | HAPLN4       | hyaluronan and proteoglycan link protein 4            | ENST00000291481 | -0,800612412 |
| A_23_P348383  | NM_001080522    | CC2D2A       | coiled-coil and C2 domain containing 2A               | ENST00000510333 | -0,800813396 |
| A_23_P105465  | NM_004072       | CMKLR1       | chemokine-like receptor 1                             | ENST00000550402 | -0,800888546 |
| A_21_P0000778 | NR_038357       | LOC100507331 | uncharacterized LOC100507331                          | ENST00000456638 | -0,800899507 |
| A_33_P3346663 | NM_004069       | AP2S1        | adaptor-related protein complex 2, sigma 1 subunit    | ENST00000263270 | -0,801441015 |

|               |                 |             |                                                                |                 |              |
|---------------|-----------------|-------------|----------------------------------------------------------------|-----------------|--------------|
| A_23_P408376  | NM_025015       | HSPA12A     | heat shock 70kDa protein 12A                                   | ENST00000369209 | -0,802203673 |
| A_23_P23616   | NM_032129       | PLEKHN1     | pleckstrin homology domain containing, family N member 1       | ENST00000379409 | -0,802300171 |
| A_23_P100711  | NM_000304       | PMP22       | peripheral myelin protein 22                                   | ENST00000312280 | -0,802606033 |
| A_24_P402588  | NM_018014       | BCL11A      | B-cell CLL/lymphoma 11A (zinc finger protein)                  | ENST00000489516 | -0,802906332 |
| A_23_P77590   | NM_018052       | VAC14       | Vac14 homolog ( <i>S. cerevisiae</i> )                         | ENST00000536184 | -0,802986357 |
| A_23_P153320  | NM_000201       | ICAM1       | intercellular adhesion molecule 1                              | ENST00000264832 | -0,8033703   |
| A_33_P3286536 | NM_002033       | FUT4        | fucosyltransferase 4 (alpha (1,3) fucosyltransferase, myeloid) | ENST00000358752 | -0,804061327 |
| A_23_P1374    | NM_006257       | PRKCQ       | protein kinase C, theta                                        | ENST00000539722 | -0,8040977   |
| A_33_P3379396 | NM_006121       | KRT1        | keratin 1                                                      | ENST00000252244 | -0,804298144 |
| A_23_P72096   | NM_000575       | IL1A        | interleukin 1, alpha                                           | ENST00000263339 | -0,804299553 |
| A_23_P329870  | NM_024599       | RHBDF2      | rhomoid 5 homolog 2 ( <i>Drosophila</i> )                      | ENST00000313080 | -0,804391363 |
| A_24_P915196  | NM_153045       | C9orf91     | chromosome 9 open reading frame 91                             | ENST00000374049 | -0,804552965 |
| A_23_P37983   | NM_005947       | MT1B        | metallothionein 1B                                             | ENST00000334346 | -0,804861636 |
| A_23_P120883  | NM_002133       | HMOX1       | heme oxygenase (decycling) 1                                   | ENST00000216117 | -0,80501673  |
| A_32_P53524   | NM_004822       | NTN1        | netrin 1                                                       | ENST00000173229 | -0,805417907 |
| A_23_P255104  | NM_005779       | LHFPL2      | lipoma HMGIC fusion partner-like 2                             | ENST00000515007 | -0,805466379 |
| A_21_P0005987 | NR_015361       | LOC440896   | uncharacterized LOC440896                                      | ENST00000424682 | -0,805622601 |
| A_24_P270460  | NM_005532       | IFI27       | interferon, alpha-inducible protein 27                         | ENST00000555121 | -0,806976704 |
| A_21_P0002075 | ENST00000448595 | XLOC_002221 |                                                                | ENST00000448595 | -0,807706298 |
| A_24_P11315   | NM_020190       | OLFML3      | olfactomedin-like 3                                            | ENST00000393300 | -0,807919334 |
| A_23_P104438  | NM_032578       | MYPN        | myopalladin                                                    | ENST00000354393 | -0,808177434 |
| A_23_P253317  | NM_013308       | GPR171      | G protein-coupled receptor 171                                 | ENST00000309180 | -0,808317748 |
| A_24_P206343  | NM_033054       | MYO1G       | myosin IG                                                      | ENST00000488554 | -0,80876703  |
| A_23_P122077  | NM_016591       | GCNT4       | glucosaminyl (N-acetyl) transferase 4, core 2                  | ENST00000322348 | -0,808804692 |
| A_23_P111132  | NM_005345       | HSPA1A      | heat shock 70kDa protein 1A                                    | ENST00000375651 | -0,808918333 |
| A_23_P120883  | NM_002133       | HMOX1       | heme oxygenase (decycling) 1                                   | ENST00000216117 | -0,80924246  |
| A_33_P3301851 | NM_002419       | MAP3K11     | mitogen-activated protein kinase kinase kinase 11              | ENST00000309100 | -0,809512162 |
| A_23_P352266  | NM_000633       | BCL2        | B-cell CLL/lymphoma 2                                          | ENST00000398117 | -0,809544566 |
| A_32_P300427  | NM_153360       | APCDD1L     | adenomatosis polyposis coli down-regulated 1-like              | ENST00000371149 | -0,809875913 |



|               |                 |             |                                                            |                 |              |
|---------------|-----------------|-------------|------------------------------------------------------------|-----------------|--------------|
| A_24_P207139  | NM_033238       | PML         | promyelocytic leukemia                                     | ENST00000268058 | -0,810542399 |
| A_33_P3281695 | NM_001243133    | NLRP3       | NLR family, pyrin domain containing 3                      | ENST00000391827 | -0,810573049 |
| A_23_P120883  | NM_002133       | HMOX1       | heme oxygenase (decycling) 1                               | ENST00000216117 | -0,81062951  |
| A_33_P3237977 | NM_197958       | LARP6       | La ribonucleoprotein domain family, member 6               | ENST00000344870 | -0,811286469 |
| A_23_P120883  | NM_002133       | HMOX1       | heme oxygenase (decycling) 1                               | ENST00000216117 | -0,811980624 |
| A_32_P58425   | NM_153812       | PHF13       | PHD finger protein 13                                      | ENST00000377648 | -0,813486816 |
| A_21_P0006588 | ENST00000444263 | XLOC_008276 |                                                            | ENST00000444263 | -0,814756037 |
| A_33_P3415430 | NM_005346       | HSPA1B      | heat shock 70kDa protein 1B                                | ENST00000391548 | -0,814993763 |
| A_24_P320033  | NM_005191       | CD80        | CD80 molecule                                              | ENST00000264246 | -0,815555757 |
| A_23_P119337  | NM_012068       | ATF5        | activating transcription factor 5                          | ENST00000423777 | -0,815865759 |
| A_23_P352266  | NM_000633       | BCL2        | B-cell CLL/lymphoma 2                                      | ENST00000398117 | -0,816025367 |
| A_23_P122052  | NM_001008397    | GPX8        | glutathione peroxidase 8 (putative)                        | ENST00000503787 | -0,816251213 |
| A_23_P120883  | NM_002133       | HMOX1       | heme oxygenase (decycling) 1                               | ENST00000216117 | -0,81635399  |
| A_23_P111132  | NM_005345       | HSPA1A      | heat shock 70kDa protein 1A                                | ENST00000375651 | -0,81652046  |
| A_23_P111132  | NM_005345       | HSPA1A      | heat shock 70kDa protein 1A                                | ENST00000375651 | -0,816691846 |
| A_23_P358917  | NM_000765       | CYP3A7      | cytochrome P450, family 3, subfamily A, polypeptide 7      | ENST00000336374 | -0,817047947 |
| A_23_P62890   | NM_002053       | GBP1        | guanylate binding protein 1, interferon-inducible          | ENST00000370473 | -0,817086147 |
| A_23_P52761   | NM_002423       | MMP7        | matrix metalloproteinase 7 (matrilysin, uterine)           | ENST00000260227 | -0,817844078 |
| A_33_P3272921 | NM_005224       | ARID3A      | AT rich interactive domain 3A (BRIGHT-like)                | ENST00000263620 | -0,818001842 |
| A_23_P126735  | NM_000572       | IL10        | interleukin 10                                             | ENST00000423557 | -0,818060348 |
| A_23_P71530   | NM_002546       | TNFRSF11B   | tumor necrosis factor receptor superfamily, member 11b     | ENST00000521597 | -0,819667664 |
| A_23_P352266  | NM_000633       | BCL2        | B-cell CLL/lymphoma 2                                      | ENST00000398117 | -0,820536603 |
| A_24_P380061  | NM_001025616    | ARHGAP24    | Rho GTPase activating protein 24                           | ENST00000264343 | -0,820586081 |
| A_24_P349039  | NM_020754       | ARHGAP31    | Rho GTPase activating protein 31                           | ENST00000264245 | -0,820619173 |
| A_33_P3216933 | NM_015191       | SIK2        | salt-inducible kinase 2                                    | ENST00000304987 | -0,820873955 |
| A_23_P120883  | NM_002133       | HMOX1       | heme oxygenase (decycling) 1                               | ENST00000216117 | -0,820992495 |
| A_33_P3299416 | NM_181711       | GRASP       | GRP1 (general receptor for phosphoinositides 1)-associated | ENST00000293662 | -0,821317648 |
| A_32_P128258  | NR_002804       | SIGLECP3    | sialic acid binding Ig-like lectin, pseudogene 3           |                 | -0,821454772 |
| A_23_P33364   | NM_001009555    | SH3D19      | SH3 domain containing 19                                   | ENST00000514152 | -0,822438075 |

|               |                |              |                                                      |                 |  |              |
|---------------|----------------|--------------|------------------------------------------------------|-----------------|--|--------------|
| A_21_P0007850 | AK092411       | XLOC_009869  |                                                      |                 |  | -0,823441272 |
| A_23_P120883  | NM_002133      | HMOX1        | heme oxygenase (decycling) 1                         | ENST00000216117 |  | -0,823846094 |
| A_23_P120467  | NM_199427      | ZFP64        | zinc finger protein 64 homolog (mouse)               | ENST00000361387 |  | -0,824478515 |
| A_23_P200829  | NM_015326      | SRGAP2       | SLIT-ROBO Rho GTPase activating protein 2            | ENST00000295713 |  | -0,825185919 |
| A_23_P46482   | NM_018724      | IL20         | interleukin 20                                       | ENST00000367096 |  | -0,82536438  |
| A_33_P3264846 | NM_152703      | SAMD9L       | sterile alpha motif domain containing 9-like         | ENST00000394472 |  | -0,825560597 |
| A_23_P121657  | NM_005114      | HS3ST1       | heparan sulfate (glucosamine) 3-O-sulfotransferase 1 | ENST00000002596 |  | -0,826750653 |
| A_33_P3217704 | NM_025182      | KIAA1539     | KIAA1539                                             | ENST00000378566 |  | -0,827001246 |
| A_23_P65442   | NM_006084      | IRF9         | interferon regulatory factor 9                       | ENST00000396864 |  | -0,828949674 |
| A_23_P352266  | NM_000633      | BCL2         | B-cell CLL/lymphoma 2                                | ENST00000398117 |  | -0,829436991 |
| A_23_P120883  | NM_002133      | HMOX1        | heme oxygenase (decycling) 1                         | ENST00000216117 |  | -0,830671062 |
| A_24_P320665  | NM_032581      | FAM126A      | family with sequence similarity 126, member A        | ENST00000432176 |  | -0,831610152 |
| A_21_P0002261 | TCONS_00003800 | XLOC_001595  |                                                      |                 |  | -0,83183681  |
| A_21_P0014373 | XR_109500      | LOC100506419 | uncharacterized LOC100506419                         |                 |  | -0,832012119 |
| A_24_P324405  | NM_013275      | ANKRD11      | ankyrin repeat domain 11                             | ENST00000330736 |  | -0,832154001 |
| A_23_P105465  | NM_004072      | CMKLR1       | chemokine-like receptor 1                            | ENST00000550402 |  | -0,832263966 |
| A_23_P120883  | NM_002133      | HMOX1        | heme oxygenase (decycling) 1                         | ENST00000216117 |  | -0,832302126 |
| A_23_P105465  | NM_004072      | CMKLR1       | chemokine-like receptor 1                            | ENST00000550402 |  | -0,832382763 |
| A_23_P354591  | NM_033446      | FAM125B      | family with sequence similarity 125, member B        | ENST00000361171 |  | -0,83254013  |
| A_33_P3372910 | NM_014314      | DDX58        | DEAD (Asp-Glu-Ala-Asp) box polypeptide 58            | ENST00000379882 |  | -0,832549493 |
| A_23_P126735  | NM_000572      | IL10         | interleukin 10                                       | ENST00000423557 |  | -0,832741679 |
| A_23_P334664  | NM_033247      | PML          | promyelocytic leukemia                               | ENST00000395132 |  | -0,832768346 |
| A_23_P117782  | NM_018357      | LARP6        | La ribonucleoprotein domain family, member 6         | ENST00000299213 |  | -0,833068871 |
| A_23_P126735  | NM_000572      | IL10         | interleukin 10                                       | ENST00000423557 |  | -0,833402994 |
| A_33_P3287959 | NM_006989      | RASA4        | RAS p21 protein activator 4                          | ENST00000262940 |  | -0,833886973 |
| A_23_P153562  | NM_001736      | C5AR1        | complement component 5a receptor 1                   | ENST00000355085 |  | -0,834082434 |
| A_24_P287189  | NM_019009      | TOLLIP       | toll interacting protein                             | ENST00000317204 |  | -0,834447896 |
| A_24_P208567  | NM_003855      | IL18R1       | interleukin 18 receptor 1                            | ENST00000409599 |  | -0,834890069 |
| A_23_P154849  | NM_138983      | OLIG1        | oligodendrocyte transcription factor 1               | ENST00000426947 |  | -0,836527206 |

|               |                 |             |                                                                |                 |              |
|---------------|-----------------|-------------|----------------------------------------------------------------|-----------------|--------------|
| A_23_P105794  | NM_033255       | EPSTI1      | epithelial stromal interaction 1 (breast)                      | ENST00000476830 | -0,837647257 |
| A_24_P353638  | NM_021181       | SLAMF7      | SLAM family member 7                                           | ENST00000466792 | -0,837740812 |
| A_33_P3273173 | NM_004651       | USP11       | ubiquitin specific peptidase 11                                | ENST00000489030 | -0,837874658 |
| A_23_P360754  | NM_005099       | ADAMTS4     | ADAM metallopeptidase with thrombospondin type 1 motif         | ENST00000367996 | -0,83837191  |
| A_23_P1691    | NM_002421       | MMP1        | matrix metallopeptidase 1 (interstitial collagenase)           | ENST00000315274 | -0,838698176 |
| A_33_P3638471 | BC027954        | TRGV7       | T cell receptor gamma variable 7 (pseudogene)                  |                 | -0,839329123 |
| A_23_P126735  | NM_000572       | IL10        | interleukin 10                                                 | ENST00000423557 | -0,840183333 |
| A_33_P3213707 | NM_025239       | PDCD1LG2    | programmed cell death 1 ligand 2                               | ENST00000397745 | -0,841504177 |
| A_23_P304682  | NM_001424       | EMP2        | epithelial membrane protein 2                                  | ENST00000359543 | -0,841666428 |
| A_33_P3341239 | NM_006201       | CDK16       | cyclin-dependent kinase 16                                     | ENST00000276052 | -0,841697176 |
| A_23_P138725  | NM_031484       | MARVELD1    | MARVEL domain containing 1                                     | ENST00000285605 | -0,842377055 |
| A_24_P59667   | NM_000215       | JAK3        | Janus kinase 3                                                 | ENST00000458235 | -0,84318245  |
| A_24_P382187  | NM_001552       | IGFBP4      | insulin-like growth factor binding protein 4                   | ENST00000269593 | -0,84381262  |
| A_33_P3377151 | NM_006274       | CCL19       | chemokine (C-C motif) ligand 19                                | ENST00000378800 | -0,844182983 |
| A_33_P3263538 | AF001893        | NEAT1       | nuclear paraspeckle assembly transcript 1 (non-protein coding) |                 | -0,847701214 |
| A_23_P422071  | NM_003782       | B3GALT4     | UDP-Gal:betaGlcNAc beta 1,3-galactosyltransferase, polype      | ENST00000383209 | -0,84802547  |
| A_24_P379104  | NM_006875       | PIM2        | pim-2 oncogene                                                 | ENST00000376509 | -0,848375166 |
| A_24_P269062  | NM_030964       | SPRY4       | sprouty homolog 4 (Drosophila)                                 | ENST00000344120 | -0,848640097 |
| A_23_P120467  | NM_199427       | ZFP64       | zinc finger protein 64 homolog (mouse)                         | ENST00000361387 | -0,849131589 |
| A_32_P231617  | NM_014220       | TM4SF1      | transmembrane 4 L six family member 1                          | ENST00000383054 | -0,85161815  |
| A_23_P38446   | NM_021137       | TNFAIP1     | tumor necrosis factor, alpha-induced protein 1 (endothelial    | ENST00000226225 | -0,85167486  |
| A_23_P71530   | NM_002546       | TNFRSF11B   | tumor necrosis factor receptor superfamily, member 11b         | ENST00000521597 | -0,851828776 |
| A_23_P213562  | NM_001992       | F2R         | coagulation factor II (thrombin) receptor                      | ENST00000319211 | -0,852226617 |
| A_33_P3375859 | NR_002712       | CXCR2P1     | chemokine (C-X-C motif) receptor 2 pseudogene 1                | ENST00000439871 | -0,852605641 |
| A_23_P1691    | NM_002421       | MMP1        | matrix metallopeptidase 1 (interstitial collagenase)           | ENST00000315274 | -0,852633752 |
| A_24_P98613   | NM_030927       | TSPAN14     | tetraspanin 14                                                 | ENST00000265450 | -0,852700454 |
| A_21_P0006016 | ENST00000424682 | XLOC_007390 |                                                                | ENST00000424682 | -0,85325716  |
| A_23_P126735  | NM_000572       | IL10        | interleukin 10                                                 | ENST00000423557 | -0,853314261 |
| A_23_P352266  | NM_000633       | BCL2        | B-cell CLL/lymphoma 2                                          | ENST00000398117 | -0,85381875  |

|               |                 |             |                                                            |                 |              |
|---------------|-----------------|-------------|------------------------------------------------------------|-----------------|--------------|
| A_23_P121657  | NM_005114       | HS3ST1      | heparan sulfate (glucosamine) 3-O-sulfotransferase 1       | ENST00000002596 | -0,853842197 |
| A_23_P113161  | NM_030806       | C1orf21     | chromosome 1 open reading frame 21                         | ENST00000235307 | -0,854048507 |
| A_24_P275073  | NM_139155       | ADAMTS14    | ADAM metallopeptidase with thrombospondin type 1 motif     | ENST00000373208 | -0,854318456 |
| A_23_P167096  | NM_005429       | VEGFC       | vascular endothelial growth factor C                       | ENST00000280193 | -0,854424779 |
| A_23_P8834    | NM_001979       | EPHX2       | epoxide hydrolase 2, cytoplasmic                           | ENST00000415449 | -0,854816432 |
| A_23_P87879   | NM_001781       | CD69        | CD69 molecule                                              | ENST00000228434 | -0,8584595   |
| A_23_P126735  | NM_000572       | IL10        | interleukin 10                                             | ENST00000423557 | -0,858925451 |
| A_32_P76720   | NM_001031701    | NT5DC3      | 5'-nucleotidase domain containing 3                        | ENST00000392876 | -0,859342394 |
| A_23_P163639  | NM_013275       | ANKRD11     | ankyrin repeat domain 11                                   | ENST00000378330 | -0,860345506 |
| A_24_P160466  | NM_052899       | GPRIN1      | G protein regulated inducer of neurite outgrowth 1         | ENST00000303991 | -0,861513479 |
| A_23_P337155  | NM_001082968    | TOM1L2      | target of myb1-like 2 (chicken)                            | ENST00000395739 | -0,862798111 |
| A_33_P3352827 | NM_003037       | SLAMF1      | signaling lymphocytic activation molecule family member 1  | ENST00000355199 | -0,863221313 |
| A_23_P126735  | NM_000572       | IL10        | interleukin 10                                             | ENST00000423557 | -0,863515712 |
| A_23_P215634  | NM_001013398    | IGFBP3      | insulin-like growth factor binding protein 3               | ENST00000438491 | -0,864965055 |
| A_23_P1691    | NM_002421       | MMP1        | matrix metallopeptidase 1 (interstitial collagenase)       | ENST00000315274 | -0,865223289 |
| A_23_P6381    | NM_002430       | MN1         | meningioma (disrupted in balanced translocation) 1         | ENST00000302326 | -0,865783793 |
| A_33_P3332362 | NM_001207026    | POU2F2      | POU class 2 homeobox 2                                     | ENST00000342301 | -0,866448628 |
| A_32_P54553   | ENST00000454608 | USP41       | ubiquitin specific peptidase 41                            | ENST00000454608 | -0,867225211 |
| A_23_P344568  | NM_145019       | FAM124A     | family with sequence similarity 124A                       | ENST00000280057 | -0,867527729 |
| A_23_P125680  | NM_017938       | FAM70A      | family with sequence similarity 70, member A               | ENST00000440464 | -0,868211136 |
| A_33_P3213064 | NM_005419       | STAT2       | signal transducer and activator of transcription 2, 113kDa | ENST00000556539 | -0,868238531 |
| A_24_P398323  | NM_001003827    | TRIM34      | tripartite motif containing 34                             | ENST00000495668 | -0,869187935 |
| A_23_P73609   | NM_000266       | NDP         | Norrie disease (pseudoglioma)                              | ENST00000378062 | -0,870780214 |
| A_23_P1691    | NM_002421       | MMP1        | matrix metallopeptidase 1 (interstitial collagenase)       | ENST00000315274 | -0,871425302 |
| A_21_P0010039 | THC2657240      | XLOC_013743 |                                                            |                 | -0,872481993 |
| A_33_P3280044 | NM_013275       | ANKRD11     | ankyrin repeat domain 11                                   | ENST00000378332 | -0,873232537 |
| A_33_P3403942 | NM_080721       | C20orf123   | chromosome 20 open reading frame 123                       | ENST00000279028 | -0,876432842 |
| A_33_P3296707 | NM_001078173    | FAM127C     | family with sequence similarity 127, member C              | ENST00000391440 | -0,876440142 |
| A_33_P3258392 | NM_001955       | EDN1        | endothelin 1                                               | ENST00000379375 | -0,87690199  |

|               |                 |              |                                                        |                 |              |
|---------------|-----------------|--------------|--------------------------------------------------------|-----------------|--------------|
| A_33_P3215113 | NM_012317       | LDOC1        | leucine zipper, down-regulated in cancer 1             | ENST00000370526 | -0,877645    |
| A_33_P3276615 | NM_030643       | APOL4        | apolipoprotein L, 4                                    | ENST00000352371 | -0,878504502 |
| A_33_P3319870 | NM_001191323    | GREM1        | gremlin 1                                              | ENST00000322805 | -0,878690513 |
| A_23_P27584   | NM_001020818    | MYADM        | myeloid-associated differentiation marker              | ENST00000391771 | -0,87890974  |
| A_33_P3376965 | NM_024111       | CHAC1        | ChaC, cation transport regulator homolog 1 (E. coli)   | ENST00000487220 | -0,879096788 |
| A_23_P121657  | NM_005114       | HS3ST1       | heparan sulfate (glucosamine) 3-O-sulfotransferase 1   | ENST00000002596 | -0,879127156 |
| A_33_P3319401 | ENST00000535396 | ARHGAP21     | Rho GTPase activating protein 21                       | ENST00000535396 | -0,879358629 |
| A_23_P21376   | NM_012301       | MAGI2        | membrane associated guanylate kinase, WW and PDZ dom:  | ENST00000354212 | -0,87964603  |
| A_24_P935103  | NM_001116       | ADCY9        | adenylate cyclase 9                                    | ENST00000294016 | -0,880196171 |
| A_23_P87879   | NM_001781       | CD69         | CD69 molecule                                          | ENST00000228434 | -0,881539916 |
| A_23_P358597  | NM_022361       | POPDC3       | popeye domain containing 3                             | ENST00000474760 | -0,882102292 |
| A_24_P313418  | NM_002990       | CCL22        | chemokine (C-C motif) ligand 22                        | ENST00000219235 | -0,882985855 |
| A_23_P126735  | NM_000572       | IL10         | interleukin 10                                         | ENST00000423557 | -0,883079458 |
| A_32_P91902   | NM_030927       | TSPAN14      | tetraspanin 14                                         | ENST00000429989 | -0,883183851 |
| A_23_P113161  | NM_030806       | C1orf21      | chromosome 1 open reading frame 21                     | ENST00000235307 | -0,883284794 |
| A_21_P0014461 | XR_109940       | LOC100506934 | uncharacterized LOC100506934                           |                 | -0,886043576 |
| A_33_P3367301 | NM_152219       | GJD3         | gap junction protein, delta 3, 31.9kDa                 |                 | -0,886081987 |
| A_24_P360529  | ENST00000396642 | PDE7A        | phosphodiesterase 7A                                   | ENST00000396642 | -0,886094457 |
| A_23_P259344  | NM_031890       | CECR6        | cat eye syndrome chromosome region, candidate 6        | ENST00000331437 | -0,8867812   |
| A_33_P3357535 | NM_030579       | CYB5B        | cytochrome b5 type B (outer mitochondrial membrane)    | ENST00000307892 | -0,887074598 |
| A_23_P105794  | NM_033255       | EPSTI1       | epithelial stromal interaction 1 (breast)              | ENST00000476830 | -0,887587224 |
| A_33_P3289128 | NM_001137601    | ZBTB42       | zinc finger and BTB domain containing 42               | ENST00000342537 | -0,887807651 |
| A_23_P126735  | NM_000572       | IL10         | interleukin 10                                         | ENST00000423557 | -0,887811702 |
| A_23_P126735  | NM_000572       | IL10         | interleukin 10                                         | ENST00000423557 | -0,888475274 |
| A_23_P71530   | NM_002546       | TNFRSF11B    | tumor necrosis factor receptor superfamily, member 11b | ENST00000521597 | -0,888730725 |
| A_23_P361448  | NM_144665       | SESN3        | sestrin 3                                              | ENST00000393234 | -0,889328258 |
| A_23_P7361    | NM_024090       | ELOVL6       | ELOVL fatty acid elongase 6                            | ENST00000394607 | -0,889469566 |
| A_24_P396753  | NM_021643       | TRIB2        | tribbles homolog 2 (Drosophila)                        | ENST00000155926 | -0,889718725 |
| A_21_P0002334 | THC2686815      | XLOC_001788  |                                                        |                 | -0,890677085 |



|                |              |             |                                                             |                 |              |
|----------------|--------------|-------------|-------------------------------------------------------------|-----------------|--------------|
| A_23_P94216    | NM_152271    | LONRF1      | LON peptidase N-terminal domain and ring finger 1           | ENST00000526680 | -0,891211731 |
| A_23_P1691     | NM_002421    | MMP1        | matrix metalloproteinase 1 (interstitial collagenase)       | ENST00000315274 | -0,89154225  |
| A_23_P308722   | NM_145038    | CCDC164     | coiled-coil domain containing 164                           | ENST00000288710 | -0,891946345 |
| A_19_P00805812 | THC2535688   | Q5A5F0      |                                                             |                 | -0,892012741 |
| A_23_P134454   | NM_001753    | CAV1        | caveolin 1, caveolae protein, 22kDa                         | ENST00000341049 | -0,893706898 |
| A_23_P113471   | NM_174912    | FAAH2       | fatty acid amide hydrolase 2                                | ENST00000491179 | -0,893846958 |
| A_23_P340848   | NM_000960    | PTGIR       | prostaglandin I2 (prostacyclin) receptor (IP)               | ENST00000291294 | -0,89386808  |
| A_33_P3354607  | NM_002984    | CCL4        | chemokine (C-C motif) ligand 4                              | ENST00000250151 | -0,894186859 |
| A_33_P3416473  | NR_024390    | LOC646999   | akirin 1 pseudogene                                         |                 | -0,895148465 |
| A_24_P356916   | NM_001011554 | SLC13A3     | solute carrier family 13 (sodium-dependent dicarboxylate tr | ENST00000279027 | -0,895470841 |
| A_23_P105794   | NM_033255    | EPSTI1      | epithelial stromal interaction 1 (breast)                   | ENST00000476830 | -0,895662462 |
| A_24_P148717   | NM_001295    | CCR1        | chemokine (C-C motif) receptor 1                            | ENST00000296140 | -0,895822941 |
| A_23_P144916   | NM_005110    | GFPT2       | glutamine-fructose-6-phosphate transaminase 2               | ENST00000253778 | -0,895977876 |
| A_23_P1691     | NM_002421    | MMP1        | matrix metalloproteinase 1 (interstitial collagenase)       | ENST00000315274 | -0,896492153 |
| A_23_P1691     | NM_002421    | MMP1        | matrix metalloproteinase 1 (interstitial collagenase)       | ENST00000315274 | -0,896649394 |
| A_23_P112554   | NM_001855    | COL15A1     | collagen, type XV, alpha 1                                  | ENST00000375001 | -0,897409438 |
| A_23_P51231    | NM_001031680 | RUNX3       | runt-related transcription factor 3                         | ENST00000308873 | -0,897973235 |
| A_33_P3403107  | NM_199285    | PRR19       | proline rich 19                                             | ENST00000341747 | -0,898470543 |
| A_23_P105794   | NM_033255    | EPSTI1      | epithelial stromal interaction 1 (breast)                   | ENST00000476830 | -0,898651561 |
| A_21_P0010405  | THC2613584   | XLOC_014192 |                                                             |                 | -0,898908778 |
| A_23_P104438   | NM_032578    | MYPN        | myopalladin                                                 | ENST00000354393 | -0,898988397 |
| A_33_P3281191  | NM_002508    | NID1        | nidogen 1                                                   | ENST00000366595 | -0,899477431 |
| A_33_P3246833  | NM_173843    | IL1RN       | interleukin 1 receptor antagonist                           | ENST00000259206 | -0,900842463 |
| A_23_P49539    | NM_001080519 | BAHCC1      | BAH domain and coiled-coil containing 1                     | ENST00000307745 | -0,901540327 |
| A_32_P96000    | NM_001004341 | ETV3L       | ets variant 3-like                                          | ENST00000454449 | -0,901780237 |
| A_23_P303455   | NM_153832    | GPR161      | G protein-coupled receptor 161                              | ENST00000367835 | -0,901881885 |
| A_23_P105465   | NM_004072    | CMKLR1      | chemokine-like receptor 1                                   | ENST00000550402 | -0,902415679 |
| A_33_P3275846  | NM_023035    | CACNA1A     | calcium channel, voltage-dependent, P/Q type, alpha 1A sub  | ENST00000357018 | -0,90291166  |
| A_23_P1691     | NM_002421    | MMP1        | matrix metalloproteinase 1 (interstitial collagenase)       | ENST00000315274 | -0,903670579 |

|               |              |              |                                                            |                 |              |
|---------------|--------------|--------------|------------------------------------------------------------|-----------------|--------------|
| A_23_P120103  | NM_002252    | KCNS3        | potassium voltage-gated channel, delayed-rectifier, subfam | ENST00000403915 | -0,904025448 |
| A_33_P3372979 | NR_015451    | LINC00294    | long intergenic non-protein coding RNA 294                 |                 | -0,90409854  |
| A_21_P0000818 | NR_038847    | LOC100505576 | uncharacterized LOC100505576                               |                 | -0,904140186 |
| A_33_P3610406 | NR_028501    | ECEL1P2      | endothelin converting enzyme-like 1, pseudogene 2          | ENST00000461596 | -0,904424859 |
| A_23_P127584  | NM_006169    | NNMT         | nicotinamide N-methyltransferase                           | ENST00000299964 | -0,904967688 |
| A_33_P3322999 | NM_001164375 | C10orf105    | chromosome 10 open reading frame 105                       | ENST00000398786 | -0,905472369 |
| A_23_P105794  | NM_033255    | EPSTI1       | epithelial stromal interaction 1 (breast)                  | ENST00000476830 | -0,906236129 |
| A_23_P105794  | NM_033255    | EPSTI1       | epithelial stromal interaction 1 (breast)                  | ENST00000476830 | -0,907130964 |
| A_33_P3225522 | NM_001032731 | OAS2         | 2'-5'-oligoadenylate synthetase 2, 69/71kDa                | ENST00000449768 | -0,907176205 |
| A_23_P113161  | NM_030806    | C1orf21      | chromosome 1 open reading frame 21                         | ENST00000235307 | -0,90814724  |
| A_23_P104438  | NM_032578    | MYPN         | myopalladin                                                | ENST00000354393 | -0,909076177 |
| A_23_P105794  | NM_033255    | EPSTI1       | epithelial stromal interaction 1 (breast)                  | ENST00000476830 | -0,9092561   |
| A_23_P71530   | NM_002546    | TNFRSF11B    | tumor necrosis factor receptor superfamily, member 11b     | ENST00000521597 | -0,909561967 |
| A_24_P329795  | NM_007021    | C10orf10     | chromosome 10 open reading frame 10                        | ENST00000298295 | -0,910317406 |
| A_33_P3299525 | NM_001029859 | KCTD21       | potassium channel tetramerisation domain containing 21     | ENST00000340067 | -0,910948111 |
| A_23_P1691    | NM_002421    | MMP1         | matrix metalloproteinase 1 (interstitial collagenase)      | ENST00000315274 | -0,91113317  |
| A_23_P819     | NM_005101    | ISG15        | ISG15 ubiquitin-like modifier                              | ENST00000379389 | -0,911777493 |
| A_23_P71530   | NM_002546    | TNFRSF11B    | tumor necrosis factor receptor superfamily, member 11b     | ENST00000521597 | -0,912096071 |
| A_33_P3423949 | NM_005189    | CBX2         | chromobox homolog 2                                        | ENST00000310942 | -0,912582487 |
| A_23_P1691    | NM_002421    | MMP1         | matrix metalloproteinase 1 (interstitial collagenase)      | ENST00000315274 | -0,913053112 |
| A_23_P87879   | NM_001781    | CD69         | CD69 molecule                                              | ENST00000228434 | -0,913409153 |
| A_23_P352266  | NM_000633    | BCL2         | B-cell CLL/lymphoma 2                                      | ENST00000398117 | -0,913700986 |
| A_23_P105465  | NM_004072    | CMKLR1       | chemokine-like receptor 1                                  | ENST00000550402 | -0,913711159 |
| A_23_P105794  | NM_033255    | EPSTI1       | epithelial stromal interaction 1 (breast)                  | ENST00000476830 | -0,914253325 |
| A_23_P501754  | NM_000759    | CSF3         | colony stimulating factor 3 (granulocyte)                  | ENST00000394149 | -0,914797362 |
| A_23_P87879   | NM_001781    | CD69         | CD69 molecule                                              | ENST00000228434 | -0,914884579 |
| A_23_P145874  | NM_152703    | SAMD9L       | sterile alpha motif domain containing 9-like               | ENST00000411955 | -0,914898651 |
| A_32_P162374  | NM_173529    | C18orf54     | chromosome 18 open reading frame 54                        | ENST00000300091 | -0,914940118 |
| A_33_P3393766 | NM_001130677 | C17orf96     | chromosome 17 open reading frame 96                        | ENST00000325814 | -0,915301698 |

|               |              |           |                                                             |                 |              |
|---------------|--------------|-----------|-------------------------------------------------------------|-----------------|--------------|
| A_24_P115199  | NM_001037165 | FO XK1    | forkhead box K1                                             | ENST00000328914 | -0,916276847 |
| A_23_P71530   | NM_002546    | TNFRSF11B | tumor necrosis factor receptor superfamily, member 11b      | ENST00000521597 | -0,916672785 |
| A_23_P364613  | NM_138413    | HOGA1     | 4-hydroxy-2-oxoglutarate aldolase 1                         | ENST00000370646 | -0,917020284 |
| A_33_P3321697 | NM_022140    | EPB41L4A  | erythrocyte membrane protein band 4.1 like 4A               | ENST00000261486 | -0,917029769 |
| A_33_P3315906 | NM_032611    | PTP4A3    | protein tyrosine phosphatase type IVA, member 3             | ENST00000521578 | -0,91759957  |
| A_23_P94030   | NM_002291    | LAMB1     | laminin, beta 1                                             | ENST00000222399 | -0,918669906 |
| A_23_P82868   | NM_000930    | PLAT      | plasminogen activator, tissue                               | ENST00000352041 | -0,918957656 |
| A_23_P121106  | NM_003865    | HESX1     | HESX homeobox 1                                             | ENST00000295934 | -0,919902027 |
| A_33_P3692979 | AK093862     | LOC283485 | uncharacterized LOC283485                                   |                 | -0,920336347 |
| A_23_P108501  | NM_004438    | EPHA4     | EPH receptor A4                                             | ENST00000392071 | -0,920422195 |
| A_33_P3360341 | NM_001002295 | GATA3     | GATA binding protein 3                                      | ENST00000379328 | -0,920682422 |
| A_33_P3687198 | AK094730     | LOC283454 | uncharacterized LOC283454                                   |                 | -0,920812167 |
| A_24_P335305  | NM_006187    | OAS3      | 2'-5'-oligoadenylate synthetase 3, 100kDa                   | ENST00000323881 | -0,921783826 |
| A_23_P410965  | NM_020888    | KIAA1522  | KIAA1522                                                    | ENST00000401073 | -0,922198148 |
| A_23_P120467  | NM_199427    | ZFP64     | zinc finger protein 64 homolog (mouse)                      | ENST00000361387 | -0,922457101 |
| A_32_P9543    | NM_145699    | APOBEC3A  | apolipoprotein B mRNA editing enzyme, catalytic polypeptide | ENST00000402255 | -0,922774554 |
| A_23_P87879   | NM_001781    | CD69      | CD69 molecule                                               | ENST00000228434 | -0,923041298 |
| A_33_P3672756 | XR_112106    | LOC284561 | uncharacterized LOC284561                                   |                 | -0,923083343 |
| A_23_P60146   | NM_006207    | PDGFRL    | platelet-derived growth factor receptor-like                | ENST00000251630 | -0,924024686 |
| A_23_P6293    | NM_018961    | UBASH3A   | ubiquitin associated and SH3 domain containing A            | ENST00000473381 | -0,925852917 |
| A_23_P71530   | NM_002546    | TNFRSF11B | tumor necrosis factor receptor superfamily, member 11b      | ENST00000521597 | -0,927237768 |
| A_23_P82868   | NM_000930    | PLAT      | plasminogen activator, tissue                               | ENST00000352041 | -0,932090412 |
| A_23_P105794  | NM_033255    | EPSTI1    | epithelial stromal interaction 1 (breast)                   | ENST00000476830 | -0,934898523 |
| A_24_P295010  | NM_004155    | SERPINB9  | serpin peptidase inhibitor, clade B (ovalbumin), member 9   | ENST00000380698 | -0,935317352 |
| A_23_P105794  | NM_033255    | EPSTI1    | epithelial stromal interaction 1 (breast)                   | ENST00000476830 | -0,935862732 |
| A_21_P0000015 | NM_001146106 | PARP9     | poly (ADP-ribose) polymerase family, member 9               | ENST00000462315 | -0,936587911 |
| A_23_P129717  | NM_080663    | ERI2      | ERI1 exoribonuclease family member 2                        | ENST00000300005 | -0,936866797 |
| A_24_P766716  | NM_001142343 | CMKLR1    | chemokine-like receptor 1                                   | ENST00000312143 | -0,937156    |
| A_23_P338479  | NM_014143    | CD274     | CD274 molecule                                              | ENST00000381577 | -0,938293143 |

|               |                 |              |                                                                |                 |              |
|---------------|-----------------|--------------|----------------------------------------------------------------|-----------------|--------------|
| A_33_P3376971 | NM_024111       | CHAC1        | ChaC, cation transport regulator homolog 1 (E. coli)           | ENST00000446533 | -0,938721118 |
| A_23_P337262  | NM_153000       | APCDD1       | adenomatosis polyposis coli down-regulated 1                   | ENST00000423585 | -0,939038735 |
| A_21_P0014427 | ENST00000441316 | LOC100506544 |                                                                | ENST00000441316 | -0,939413665 |
| A_23_P407096  | NM_152625       | ZNF366       | zinc finger protein 366                                        | ENST00000318442 | -0,93977016  |
| A_23_P20122   | NM_024625       | ZC3HAV1      | zinc finger CCCH-type, antiviral 1                             | ENST00000471652 | -0,941232316 |
| A_23_P126593  | NM_005620       | S100A11      | S100 calcium binding protein A11                               | ENST00000271638 | -0,941237406 |
| A_24_P336718  | NM_002871       | RABIF        | RAB interacting factor                                         | ENST00000367262 | -0,941498497 |
| A_21_P0003409 | ENST00000515860 | XLOC_003709  |                                                                | ENST00000515860 | -0,941671786 |
| A_33_P3225625 | NM_001003799    | TARP         | TCR gamma alternate reading frame protein                      | ENST00000443402 | -0,942116394 |
| A_23_P13382   | NM_001013254    | LSP1         | lymphocyte-specific protein 1                                  | ENST00000406638 | -0,942380708 |
| A_21_P0004271 | ENST00000508366 | ATP6AP1L     | ATPase, H+ transporting, lysosomal accessory protein 1-like    | ENST00000508366 | -0,943635253 |
| A_23_P113161  | NM_030806       | C1orf21      | chromosome 1 open reading frame 21                             | ENST00000235307 | -0,943650336 |
| A_23_P352266  | NM_000633       | BCL2         | B-cell CLL/lymphoma 2                                          | ENST00000398117 | -0,9437909   |
| A_23_P87879   | NM_001781       | CD69         | CD69 molecule                                                  | ENST00000228434 | -0,947244305 |
| A_24_P753476  | NR_002942       | LOC340508    | growth arrest-specific 2 like 1 pseudogene                     |                 | -0,949845373 |
| A_24_P305570  | NM_018993       | RIN2         | Ras and Rab interactor 2                                       | ENST00000255006 | -0,950396613 |
| A_23_P300150  | NM_172387       | NFATC1       | nuclear factor of activated T-cells, cytoplasmic, calcineurin- | ENST00000318065 | -0,950540501 |
| A_33_P3381513 | NM_014143       | CD274        | CD274 molecule                                                 | ENST00000492923 | -0,951085008 |
| A_23_P215634  | NM_001013398    | IGFBP3       | insulin-like growth factor binding protein 3                   | ENST00000438491 | -0,951413161 |
| A_23_P121106  | NM_003865       | HESX1        | HESX homeobox 1                                                | ENST00000295934 | -0,951794888 |
| A_33_P3283824 | NM_001135147    | SLC39A8      | solute carrier family 39 (zinc transporter), member 8          | ENST00000424970 | -0,951993427 |
| A_23_P106973  | NM_006640       | Sep-09       | septin 9                                                       | ENST00000329047 | -0,952362992 |
| A_33_P3248439 | NM_033446       | FAM125B      | family with sequence similarity 125, member B                  | ENST00000361171 | -0,953211438 |
| A_23_P1602    | NM_006779       | CDC42EP2     | CDC42 effector protein (Rho GTPase binding) 2                  | ENST00000544348 | -0,953632724 |
| A_23_P83200   | NM_152572       | AK8          | adenylate kinase 8                                             | ENST00000467161 | -0,953732164 |
| A_21_P0014570 | ENST00000547027 | LOC100505814 |                                                                | ENST00000547027 | -0,953798538 |
| A_23_P218770  | NM_002872       | RAC2         | ras-related C3 botulinum toxin substrate 2 (rho family, small  | ENST00000249071 | -0,953931199 |
| A_23_P106973  | NM_006640       | Sep-09       | septin 9                                                       | ENST00000329047 | -0,953933081 |
| A_23_P106973  | NM_006640       | Sep-09       | septin 9                                                       | ENST00000329047 | -0,955552169 |

|               |              |              |                                                                |                 |              |
|---------------|--------------|--------------|----------------------------------------------------------------|-----------------|--------------|
| A_23_P106973  | NM_006640    | Sep-09       | septin 9                                                       | ENST00000329047 | -0,956299224 |
| A_33_P3215198 | BC141802     | CMPK2        | cytidine monophosphate (UMP-CMP) kinase 2, mitochondri         | ENST00000404168 | -0,956909695 |
| A_24_P414376  | NM_016531    | KLF3         | Kruppel-like factor 3 (basic)                                  | ENST00000261438 | -0,956975377 |
| A_24_P54131   | NM_022836    | DCLRE1B      | DNA cross-link repair 1B                                       | ENST00000369563 | -0,957877317 |
| A_23_P106973  | NM_006640    | Sep-09       | septin 9                                                       | ENST00000329047 | -0,958694487 |
| A_33_P3697530 | NM_001142287 | SEMA4D       | sema domain, immunoglobulin domain (Ig), transmembran          | ENST00000469653 | -0,959468141 |
| A_23_P113161  | NM_030806    | C1orf21      | chromosome 1 open reading frame 21                             | ENST00000235307 | -0,959565752 |
| A_23_P259141  | NM_030776    | ZBP1         | Z-DNA binding protein 1                                        | ENST00000461547 | -0,959903372 |
| A_23_P10025   | NM_006159    | NELL2        | NEL-like 2 (chicken)                                           | ENST00000437801 | -0,960494171 |
| A_33_P3263232 | NM_030891    | LRR3         | leucine rich repeat containing 3                               | ENST00000291592 | -0,960809151 |
| A_23_P82868   | NM_000930    | PLAT         | plasminogen activator, tissue                                  | ENST00000352041 | -0,96123679  |
| A_24_P335620  | NM_003486    | SLC7A5       | solute carrier family 7 (amino acid transporter light chain, L | ENST00000261622 | -0,96148235  |
| A_23_P106973  | NM_006640    | Sep-09       | septin 9                                                       | ENST00000329047 | -0,962012528 |
| A_33_P3282566 | NM_017728    | TMEM104      | transmembrane protein 104                                      | ENST00000335464 | -0,962203944 |
| A_23_P82868   | NM_000930    | PLAT         | plasminogen activator, tissue                                  | ENST00000352041 | -0,962312486 |
| A_23_P106973  | NM_006640    | Sep-09       | septin 9                                                       | ENST00000329047 | -0,962730049 |
| A_33_P3230254 | NM_022346    | NCAPG        | non-SMC condensin I complex, subunit G                         | ENST00000251496 | -0,963413673 |
| A_23_P66891   | NM_012121    | CDC42EP4     | CDC42 effector protein (Rho GTPase binding) 4                  | ENST00000335793 | -0,964207432 |
| A_23_P106973  | NM_006640    | Sep-09       | septin 9                                                       | ENST00000329047 | -0,964320358 |
| A_23_P106973  | NM_006640    | Sep-09       | septin 9                                                       | ENST00000329047 | -0,965818994 |
| A_23_P216655  | NM_014788    | TRIM14       | tripartite motif containing 14                                 | ENST00000341469 | -0,96739705  |
| A_23_P106973  | NM_006640    | Sep-09       | septin 9                                                       | ENST00000329047 | -0,968686327 |
| A_33_P3328360 | NR_027033    | MIRLET7BHG   | MIRLET7B host gene (non-protein coding)                        | ENST00000360737 | -0,969083276 |
| A_24_P416997  | NM_145641    | APOL3        | apolipoprotein L, 3                                            | ENST00000397287 | -0,971840845 |
| A_32_P4626    | XR_108654    | LOC100505880 | uncharacterized LOC100505880                                   |                 | -0,973573445 |
| A_23_P104438  | NM_032578    | MYPN         | myopalladin                                                    | ENST00000354393 | -0,973703791 |
| A_23_P104438  | NM_032578    | MYPN         | myopalladin                                                    | ENST00000354393 | -0,973769932 |
| A_23_P307761  | NM_031215    | CABLES2      | Cdk5 and Abl enzyme substrate 2                                | ENST00000279101 | -0,980743687 |
| A_32_P525524  | NM_178495    | ITPRIPL1     | inositol 1,4,5-trisphosphate receptor interacting protein-like | ENST00000439118 | -0,981625665 |



|               |                   |                |                                                               |                 |              |
|---------------|-------------------|----------------|---------------------------------------------------------------|-----------------|--------------|
| A_23_P82868   | NM_000930         | PLAT           | plasminogen activator, tissue                                 | ENST00000352041 | -0,981634889 |
| A_23_P29773   | NM_014398         | LAMP3          | lysosomal-associated membrane protein 3                       | ENST00000265598 | -0,982135173 |
| A_23_P386478  | NM_024873         | TNIP3          | TNFAIP3 interacting protein 3                                 | ENST00000511909 | -0,982168816 |
| A_23_P104438  | NM_032578         | MYPN           | myopalladin                                                   | ENST00000354393 | -0,983249687 |
| A_21_P0013808 | THC2666070        | XLOC_I2_015673 |                                                               |                 | -0,984106233 |
| A_23_P82868   | NM_000930         | PLAT           | plasminogen activator, tissue                                 | ENST00000352041 | -0,9845836   |
| A_23_P94754   | NM_005118         | TNFSF15        | tumor necrosis factor (ligand) superfamily, member 15         | ENST00000374044 | -0,984595971 |
| A_23_P139786  | NM_003733         | OASL           | 2'-5'-oligoadenylate synthetase-like                          | ENST00000257570 | -0,987977963 |
| A_32_P44394   | NM_004833         | AIM2           | absent in melanoma 2                                          | ENST00000368130 | -0,989719978 |
| A_33_P3269388 | NM_001146082      | MBOAT7         | membrane bound O-acyltransferase domain containing 7          | ENST00000391754 | -0,99004021  |
| A_32_P152195  | NM_198993         | STAC2          | SH3 and cysteine rich domain 2                                | ENST00000333461 | -0,991297908 |
| A_23_P82868   | NM_000930         | PLAT           | plasminogen activator, tissue                                 | ENST00000352041 | -0,991834325 |
| A_23_P207564  | NM_002984         | CCL4           | chemokine (C-C motif) ligand 4                                | ENST00000250151 | -0,994164004 |
| A_33_P3258046 | NM_170685         | TAC4           | tachykinin 4 (hemokinin)                                      | ENST00000334568 | -0,99449841  |
| A_23_P75299   | NM_022126         | LHPP           | phospholysine phosphohistidine inorganic pyrophosphate p      | ENST00000368842 | -0,994923598 |
| A_23_P422831  | NM_004816         | FAM189A2       | family with sequence similarity 189, member A2                | ENST00000257515 | -0,995634413 |
| A_23_P33326   | NM_000679         | ADRA1B         | adrenergic, alpha-1B-, receptor                               |                 | -0,996503213 |
| A_23_P134854  | NM_194284         | CLDN23         | claudin 23                                                    | ENST00000519106 | -0,997072491 |
| A_21_P0005154 | TCONS_00012648    | XLOC_005589    |                                                               |                 | -0,997476545 |
| A_23_P121106  | NM_003865         | HESX1          | HESX homeobox 1                                               | ENST00000295934 | -0,998304841 |
| A_33_P3705884 | AK094188          | LOC148189      | uncharacterized LOC148189                                     |                 | -0,998343361 |
| A_23_P123172  | NR_002157         | OR2A9P         | olfactory receptor, family 2, subfamily A, member 9 pseudo    | ENST00000461471 | -0,999473329 |
| A_32_P71571   | NM_182522         | FAM19A4        | family with sequence similarity 19 (chemokine (C-C motif)-li  | ENST00000295569 | -1,000527815 |
| A_23_P82868   | NM_000930         | PLAT           | plasminogen activator, tissue                                 | ENST00000352041 | -1,000541036 |
| A_23_P160902  | NM_001170631      | FCAMR          | Fc receptor, IgA, IgM, high affinity                          | ENST00000367087 | -1,00123479  |
| A_23_P17354   | NM_024034         | GDAP1L1        | ganglioside-induced differentiation-associated protein 1-like | ENST00000438466 | -1,002308119 |
| A_23_P210708  | NM_001040022      | SIRPA          | signal-regulatory protein alpha                               | ENST00000358771 | -1,002687884 |
| A_21_P0010669 | TCONS_I2_0000176: | XLOC_I2_001302 |                                                               |                 | -1,002719057 |
| A_23_P121106  | NM_003865         | HESX1          | HESX homeobox 1                                               | ENST00000295934 | -1,004358614 |

|               |                |             |                                                            |                 |              |
|---------------|----------------|-------------|------------------------------------------------------------|-----------------|--------------|
| A_23_P121657  | NM_005114      | HS3ST1      | heparan sulfate (glucosamine) 3-O-sulfotransferase 1       | ENST00000002596 | -1,006308969 |
| A_33_P3373459 | NM_018641      | CHST12      | carbohydrate (chondroitin 4) sulfotransferase 12           | ENST00000258711 | -1,008595484 |
| A_23_P121106  | NM_003865      | HESX1       | HESX homeobox 1                                            | ENST00000295934 | -1,008744165 |
| A_21_P0007606 | TCONS_00020518 | XLOC_009836 |                                                            |                 | -1,009711594 |
| A_33_P3236661 | BC150296       | PCDH9       | protocadherin 9                                            |                 | -1,012574659 |
| A_23_P120103  | NM_002252      | KCNS3       | potassium voltage-gated channel, delayed-rectifier, subfam | ENST00000403915 | -1,012593007 |
| A_23_P103775  | NM_032270      | LRRC8C      | leucine rich repeat containing 8 family, member C          | ENST00000370454 | -1,013440717 |
| A_23_P106844  | NM_005953      | MT2A        | metallothionein 2A                                         | ENST00000245185 | -1,013457754 |
| A_23_P50368   | NM_206818      | OSCAR       | osteoclast associated, immunoglobulin-like receptor        | ENST00000358375 | -1,013471902 |
| A_33_P3295200 | NM_001523      | HAS1        | hyaluronan synthase 1                                      | ENST00000376738 | -1,013659078 |
| A_23_P217845  | NM_002928      | RGS16       | regulator of G-protein signaling 16                        | ENST00000367558 | -1,01663808  |
| A_23_P82868   | NM_000930      | PLAT        | plasminogen activator, tissue                              | ENST00000352041 | -1,016977389 |
| A_24_P250922  | NM_000963      | PTGS2       | prostaglandin-endoperoxide synthase 2 (prostaglandin G/H   | ENST00000490885 | -1,018043105 |
| A_23_P121657  | NM_005114      | HS3ST1      | heparan sulfate (glucosamine) 3-O-sulfotransferase 1       | ENST00000002596 | -1,018521139 |
| A_24_P250922  | NM_000963      | PTGS2       | prostaglandin-endoperoxide synthase 2 (prostaglandin G/H   | ENST00000490885 | -1,019177156 |
| A_23_P121106  | NM_003865      | HESX1       | HESX homeobox 1                                            | ENST00000295934 | -1,019677928 |
| A_23_P121106  | NM_003865      | HESX1       | HESX homeobox 1                                            | ENST00000295934 | -1,019792032 |
| A_33_P3399263 | NM_001243539   | IL15RA      | interleukin 15 receptor, alpha                             | ENST00000379972 | -1,020052085 |
| A_23_P104438  | NM_032578      | MYPN        | myopalladin                                                | ENST00000354393 | -1,021176119 |
| A_24_P250922  | NM_000963      | PTGS2       | prostaglandin-endoperoxide synthase 2 (prostaglandin G/H   | ENST00000490885 | -1,023348489 |
| A_33_P3250383 | NM_033133      | CNP         | 2',3'-cyclic nucleotide 3' phosphodiesterase               |                 | -1,024471    |
| A_23_P138680  | NM_172200      | IL15RA      | interleukin 15 receptor, alpha                             | ENST00000379972 | -1,024478934 |
| A_23_P423331  | NM_032536      | NTNG2       | netrin G2                                                  | ENST00000360670 | -1,024941216 |
| A_23_P362659  | NM_002468      | MYD88       | myeloid differentiation primary response gene (88)         | ENST00000484513 | -1,025433848 |
| A_23_P121657  | NM_005114      | HS3ST1      | heparan sulfate (glucosamine) 3-O-sulfotransferase 1       | ENST00000002596 | -1,025650075 |
| A_24_P45446   | NM_052941      | GBP4        | guanylate binding protein 4                                | ENST00000471938 | -1,025913629 |
| A_23_P121106  | NM_003865      | HESX1       | HESX homeobox 1                                            | ENST00000295934 | -1,027507337 |
| A_24_P245379  | NM_002575      | SERPINB2    | serpin peptidase inhibitor, clade B (ovalbumin), member 2  | ENST00000457692 | -1,027576512 |
| A_23_P87879   | NM_001781      | CD69        | CD69 molecule                                              | ENST00000228434 | -1,028314374 |

|                |                 |             |                                                               |                 |              |
|----------------|-----------------|-------------|---------------------------------------------------------------|-----------------|--------------|
| A_23_P87879    | NM_001781       | CD69        | CD69 molecule                                                 | ENST00000228434 | -1,028926263 |
| A_23_P36397    | NM_000785       | CYP27B1     | cytochrome P450, family 27, subfamily B, polypeptide 1        | ENST00000228606 | -1,028935848 |
| A_23_P145863   | NM_005620       | S100A11     | S100 calcium binding protein A11                              | ENST00000271638 | -1,02898084  |
| A_19_P00805272 | NM_001145206    | KIAA1671    |                                                               | ENST00000358431 | -1,029836847 |
| A_21_P0001003  | ENST00000420156 | XLOC_000352 |                                                               | ENST00000420156 | -1,030003876 |
| A_24_P68783    | NM_012275       | IL36RN      | interleukin 36 receptor antagonist                            | ENST00000393200 | -1,030202554 |
| A_33_P3235213  | NM_173799       | TIGIT       | T cell immunoreceptor with Ig and ITIM domains                | ENST00000485814 | -1,031033018 |
| A_24_P238499   | NM_001012716    | C18orf56    | chromosome 18 open reading frame 56                           | ENST00000323813 | -1,031595353 |
| A_32_P101031   | NM_144586       | LYPD1       | LY6/PLAUR domain containing 1                                 | ENST00000397463 | -1,032098603 |
| A_23_P369815   | NM_000639       | FASLG       | Fas ligand (TNF superfamily, member 6)                        | ENST00000367721 | -1,032152091 |
| A_23_P104438   | NM_032578       | MYPN        | myopalladin                                                   | ENST00000354393 | -1,032605431 |
| A_23_P104438   | NM_032578       | MYPN        | myopalladin                                                   | ENST00000354393 | -1,03314214  |
| A_23_P82868    | NM_000930       | PLAT        | plasminogen activator, tissue                                 | ENST00000352041 | -1,033556624 |
| A_24_P303091   | NM_001565       | CXCL10      | chemokine (C-X-C motif) ligand 10                             | ENST00000306602 | -1,033577586 |
| A_24_P133488   | NM_017955       | CDCA4       | cell division cycle associated 4                              | ENST00000392590 | -1,034315725 |
| A_23_P358944   | NM_033244       | PML         | promyelocytic leukemia                                        | ENST00000435786 | -1,035474725 |
| A_23_P6535     | NM_138433       | KLHDC7B     | kelch domain containing 7B                                    | ENST00000395676 | -1,037611986 |
| A_24_P250922   | NM_000963       | PTGS2       | prostaglandin-endoperoxide synthase 2 (prostaglandin G/H      | ENST00000490885 | -1,038281404 |
| A_24_P788878   | NM_001007595    | C2CD4B      | C2 calcium-dependent domain containing 4B                     | ENST00000380392 | -1,038487399 |
| A_24_P235266   | NM_001001555    | GRB10       | growth factor receptor-bound protein 10                       | ENST00000403097 | -1,038885695 |
| A_24_P250922   | NM_000963       | PTGS2       | prostaglandin-endoperoxide synthase 2 (prostaglandin G/H      | ENST00000490885 | -1,03980393  |
| A_23_P127288   | NM_000417       | IL2RA       | interleukin 2 receptor, alpha                                 | ENST00000379954 | -1,040354362 |
| A_23_P120103   | NM_002252       | KCNS3       | potassium voltage-gated channel, delayed-rectifier, subfam    | ENST00000403915 | -1,040651681 |
| A_24_P114249   | NM_004482       | GALNT3      | UDP-N-acetyl-alpha-D-galactosamine:polypeptide N-acetylgl     | ENST00000392701 | -1,040746251 |
| A_24_P250922   | NM_000963       | PTGS2       | prostaglandin-endoperoxide synthase 2 (prostaglandin G/H      | ENST00000490885 | -1,040890487 |
| A_23_P13094    | NM_002425       | MMP10       | matrix metalloproteinase 10 (stromelysin 2)                   | ENST00000279441 | -1,040963464 |
| A_32_P166693   | NM_020733       | HEG1        | HEG homolog 1 (zebrafish)                                     | ENST00000311127 | -1,0410224   |
| A_24_P158718   | NM_015177       | DTX4        | deltex homolog 4 (Drosophila)                                 | ENST00000227451 | -1,041074569 |
| A_32_P224522   | NM_024103       | SLC25A23    | solute carrier family 25 (mitochondrial carrier; phosphate c: | ENST00000301454 | -1,041845248 |

|               |                 |             |                                                            |                 |              |
|---------------|-----------------|-------------|------------------------------------------------------------|-----------------|--------------|
| A_33_P3214745 | NM_001024680    | FBXO48      | F-box protein 48                                           | ENST00000377957 | -1,041998108 |
| A_24_P250922  | NM_000963       | PTGS2       | prostaglandin-endoperoxide synthase 2 (prostaglandin G/H   | ENST00000490885 | -1,0423739   |
| A_23_P351148  | NM_053282       | SH2D1B      | SH2 domain containing 1B                                   | ENST00000359567 | -1,042706002 |
| A_24_P250922  | NM_000963       | PTGS2       | prostaglandin-endoperoxide synthase 2 (prostaglandin G/H   | ENST00000490885 | -1,043497874 |
| A_32_P169406  | NR_026656       | LOC400043   | uncharacterized LOC400043                                  |                 | -1,044104888 |
| A_23_P49759   | NM_002981       | CCL1        | chemokine (C-C motif) ligand 1                             | ENST00000225842 | -1,045647533 |
| A_23_P71530   | NM_002546       | TNFRSF11B   | tumor necrosis factor receptor superfamily, member 11b     | ENST00000521597 | -1,048122635 |
| A_23_P216225  | NM_004430       | EGR3        | early growth response 3                                    | ENST00000317216 | -1,048296974 |
| A_33_P3262575 | NM_018842       | BAIAP2L1    | BAI1-associated protein 2-like 1                           | ENST00000005260 | -1,048323837 |
| A_24_P299685  | NM_198389       | PDPN        | podoplanin                                                 | ENST00000487038 | -1,04959201  |
| A_33_P3340154 | NM_022719       | DGCR14      | DiGeorge syndrome critical region gene 14                  | ENST00000252137 | -1,052221592 |
| A_21_P0002052 | TCONS_00003286  | XLOC_002099 |                                                            |                 | -1,052355152 |
| A_24_P250922  | NM_000963       | PTGS2       | prostaglandin-endoperoxide synthase 2 (prostaglandin G/H   | ENST00000490885 | -1,053694485 |
| A_24_P322635  | NM_182764       | ELMO2       | engulfment and cell motility 2                             | ENST00000396391 | -1,054029608 |
| A_33_P3407013 | ENST00000420258 | IL6         | interleukin 6 (interferon, beta 2)                         | ENST00000420258 | -1,05452923  |
| A_23_P87879   | NM_001781       | CD69        | CD69 molecule                                              | ENST00000228434 | -1,055480686 |
| A_33_P3308332 | NM_021200       | PLEKHB1     | pleckstrin homology domain containing, family B (evectins) | ENST00000426191 | -1,055763162 |
| A_23_P55649   | NM_001462       | FPR2        | formyl peptide receptor 2                                  | ENST00000340023 | -1,05616703  |
| A_23_P25674   | NM_001823       | CKB         | creatine kinase, brain                                     | ENST00000553652 | -1,057628667 |
| A_33_P3249589 | NM_022893       | BCL11A      | B-cell CLL/lymphoma 11A (zinc finger protein)              | ENST00000358510 | -1,059694822 |
| A_33_P3295203 | NM_001523       | HAS1        | hyaluronan synthase 1                                      | ENST00000376737 | -1,063551605 |
| A_23_P370682  | NM_138456       | BATF2       | basic leucine zipper transcription factor, ATF-like 2      | ENST00000527454 | -1,06366493  |
| A_23_P127186  | NM_206862       | TACC2       | transforming, acidic coiled-coil containing protein 2      | ENST00000368997 | -1,064170635 |
| A_33_P3380383 | NM_001099221    | TIFAB       | TRAF-interacting protein with forkhead-associated domain,  | ENST00000537858 | -1,065314058 |
| A_23_P121657  | NM_005114       | HS3ST1      | heparan sulfate (glucosamine) 3-O-sulfotransferase 1       | ENST00000002596 | -1,067331218 |
| A_33_P3362291 | AK001351        | FLJ10489    | uncharacterized protein FLJ10489                           | ENST00000503718 | -1,067672954 |
| A_24_P250922  | NM_000963       | PTGS2       | prostaglandin-endoperoxide synthase 2 (prostaglandin G/H   | ENST00000490885 | -1,068969497 |
| A_23_P120103  | NM_002252       | KCNS3       | potassium voltage-gated channel, delayed-rectifier, subfam | ENST00000403915 | -1,069760791 |
| A_23_P302672  | BC013592        | DDIT4L      | DNA-damage-inducible transcript 4-like                     |                 | -1,070724191 |

|                |                                  |              |                                                            |                 |              |
|----------------|----------------------------------|--------------|------------------------------------------------------------|-----------------|--------------|
| A_19_P00801649 | XR_132670                        | LOC100652730 | uncharacterized LOC100652730                               | ENST00000412500 | -1,070858961 |
| A_33_P3219591  | NM_020954                        | RNF213       | ring finger protein 213                                    | ENST00000319921 | -1,071504618 |
| A_32_P222961   | NM_001012968                     | SPIN4        | spindlin family, member 4                                  | ENST00000374884 | -1,07239992  |
| A_21_P0014094  | XR_108415                        | LOC100288092 | uncharacterized LOC100288092                               |                 | -1,073693823 |
| A_23_P214821   | NM_001955                        | EDN1         | endothelin 1                                               | ENST00000379375 | -1,075778136 |
| A_23_P214821   | NM_001955                        | EDN1         | endothelin 1                                               | ENST00000379375 | -1,078006914 |
| A_23_P120103   | NM_002252                        | KCNS3        | potassium voltage-gated channel, delayed-rectifier, subfam | ENST00000403915 | -1,079782032 |
| A_23_P132159   | NM_017414                        | USP18        | ubiquitin specific peptidase 18                            | ENST00000215794 | -1,080286789 |
| A_24_P348806   | NM_175058                        | PLEKHA7      | pleckstrin homology domain containing, family A member 7   | ENST00000448080 | -1,082123195 |
| A_24_P230563   | NM_000417                        | IL2RA        | interleukin 2 receptor, alpha                              | ENST00000447847 | -1,08354214  |
| A_23_P393620   | NM_006528                        | TFPI2        | tissue factor pathway inhibitor 2                          | ENST00000222543 | -1,085923816 |
| A_32_P24585    | NM_001017995                     | SH3PXD2B     | SH3 and PX domains 2B                                      | ENST00000311601 | -1,094397239 |
| A_33_P3228460  | NM_001136007                     | FXD3         | FXD domain containing ion transport regulator 3            | ENST00000535103 | -1,095691952 |
| A_24_P7121     | NM_024677                        | NSUN7        | NOP2/Sun domain family, member 7                           | ENST00000381782 | -1,098320729 |
| A_32_P74409    | NM_001145033                     | C11orf96     | chromosome 11 open reading frame 96                        | ENST00000528572 | -1,098543879 |
| A_33_P3225512  | NM_002535                        | OAS2         | 2'-5'-oligoadenylate synthetase 2, 69/71kDa                | ENST00000392583 | -1,105226349 |
| A_33_P3423941  | NM_003641                        | IFITM1       | interferon induced transmembrane protein 1 (9-27)          | ENST00000408968 | -1,105285985 |
| A_33_P3358342  | NM_005067                        | SIAH2        | seven in absentia homolog 2 (Drosophila)                   | ENST00000312960 | -1,105323193 |
| A_33_P3222917  | NM_001024736                     | CD276        | CD276 molecule                                             | ENST00000318443 | -1,106156287 |
| A_21_P0013613  | TCONS_I2_0002916: XLOC_I2_015090 |              |                                                            |                 | -1,106519315 |
| A_23_P42353    | NM_016135                        | ETV7         | ets variant 7                                              | ENST00000339796 | -1,108313322 |
| A_23_P214821   | NM_001955                        | EDN1         | endothelin 1                                               | ENST00000379375 | -1,111881068 |
| A_32_P83845    | NM_001040708                     | HEY1         | hairy/enhancer-of-split related with YRPW motif 1          | ENST00000337919 | -1,11435057  |
| A_24_P472007   | NM_001080421                     | UNC13A       | unc-13 homolog A (C. elegans)                              | ENST00000252773 | -1,11461141  |
| A_23_P121657   | NM_005114                        | HS3ST1       | heparan sulfate (glucosamine) 3-O-sulfotransferase 1       | ENST00000002596 | -1,116779202 |
| A_23_P126649   | NM_024554                        | PGBD5        | piggyBac transposable element derived 5                    | ENST00000321327 | -1,117448584 |
| A_23_P110196   | NM_016323                        | HERC5        | hect domain and RLD 5                                      | ENST00000502913 | -1,118470451 |
| A_24_P261169   | NM_006378                        | SEMA4D       | sema domain, immunoglobulin domain (Ig), transmembran      | ENST00000422704 | -1,120267524 |
| A_23_P166797   | NM_022147                        | RTP4         | receptor (chemosensory) transporter protein 4              | ENST00000259030 | -1,123049291 |



|               |              |        |                                                                 |                 |              |
|---------------|--------------|--------|-----------------------------------------------------------------|-----------------|--------------|
| A_23_P17663   | NM_002462    | MX1    | myxovirus (influenza virus) resistance 1, interferon-inducibl   | ENST00000455164 | -1,124061039 |
| A_24_P70183   | NM_001040113 | MYH11  | myosin, heavy chain 11, smooth muscle                           | ENST00000452625 | -1,124111227 |
| A_23_P121657  | NM_005114    | HS3ST1 | heparan sulfate (glucosamine) 3-O-sulfotransferase 1            | ENST00000002596 | -1,124245237 |
| A_23_P121657  | NM_005114    | HS3ST1 | heparan sulfate (glucosamine) 3-O-sulfotransferase 1            | ENST00000002596 | -1,124372027 |
| A_24_P350759  | NM_004171    | SLC1A2 | solute carrier family 1 (glial high affinity glutamate transpor | ENST00000278379 | -1,12479017  |
| A_23_P110196  | NM_016323    | HERC5  | hect domain and RLD 5                                           | ENST00000502913 | -1,125078666 |
| A_23_P87879   | NM_001781    | CD69   | CD69 molecule                                                   | ENST00000228434 | -1,125160371 |
| A_23_P17053   | NM_019618    | IL36G  | interleukin 36, gamma                                           | ENST00000259205 | -1,127893701 |
| A_23_P343398  | NM_001838    | CCR7   | chemokine (C-C motif) receptor 7                                | ENST00000246657 | -1,128820883 |
| A_23_P110196  | NM_016323    | HERC5  | hect domain and RLD 5                                           | ENST00000502913 | -1,13279125  |
| A_32_P60065   | NM_004101    | F2RL2  | coagulation factor II (thrombin) receptor-like 2                | ENST00000296641 | -1,133117836 |
| A_23_P110196  | NM_016323    | HERC5  | hect domain and RLD 5                                           | ENST00000502913 | -1,134246016 |
| A_23_P320113  | NM_080725    | SRXN1  | sulfiredoxin 1                                                  | ENST00000427916 | -1,134601149 |
| A_33_P3298810 | NM_005304    | FFAR3  | free fatty acid receptor 3                                      | ENST00000454971 | -1,13616231  |
| A_24_P112941  | NM_032808    | LINGO1 | leucine rich repeat and Ig domain containing 1                  | ENST00000355300 | -1,137671625 |
| A_23_P214821  | NM_001955    | EDN1   | endothelin 1                                                    | ENST00000379375 | -1,137752377 |
| A_23_P214821  | NM_001955    | EDN1   | endothelin 1                                                    | ENST00000379375 | -1,13854514  |
| A_23_P110196  | NM_016323    | HERC5  | hect domain and RLD 5                                           | ENST00000502913 | -1,139165817 |
| A_24_P363548  | NM_005338    | HIP1   | huntingtin interacting protein 1                                | ENST00000336926 | -1,14237631  |
| A_23_P110196  | NM_016323    | HERC5  | hect domain and RLD 5                                           | ENST00000502913 | -1,143641368 |
| A_23_P64617   | NM_012193    | FZD4   | frizzled family receptor 4                                      | ENST00000531380 | -1,145058649 |
| A_32_P75264   | NM_178505    | TMEM26 | transmembrane protein 26                                        | ENST00000399298 | -1,145199675 |
| A_23_P123853  | NM_006274    | CCL19  | chemokine (C-C motif) ligand 19                                 | ENST00000485502 | -1,151778589 |
| A_23_P110196  | NM_016323    | HERC5  | hect domain and RLD 5                                           | ENST00000502913 | -1,151869437 |
| A_33_P3210099 | NM_020778    | ALPK3  | alpha-kinase 3                                                  | ENST00000258888 | -1,156422948 |
| A_23_P214821  | NM_001955    | EDN1   | endothelin 1                                                    | ENST00000379375 | -1,156953877 |
| A_24_P107317  | NM_004205    | USP2   | ubiquitin specific peptidase 2                                  | ENST00000260187 | -1,157506861 |
| A_24_P330303  | NM_001042481 | FRMD6  | FERM domain containing 6                                        | ENST00000557522 | -1,157729478 |
| A_23_P122924  | NM_002192    | INHBA  | inhibin, beta A                                                 | ENST00000442711 | -1,161732649 |

|               |                 |             |                                                              |                 |              |
|---------------|-----------------|-------------|--------------------------------------------------------------|-----------------|--------------|
| A_23_P110196  | NM_016323       | HERC5       | hect domain and RLD 5                                        | ENST00000502913 | -1,164681027 |
| A_23_P110196  | NM_016323       | HERC5       | hect domain and RLD 5                                        | ENST00000502913 | -1,165853394 |
| A_23_P110196  | NM_016323       | HERC5       | hect domain and RLD 5                                        | ENST00000502913 | -1,168050305 |
| A_23_P214821  | NM_001955       | EDN1        | endothelin 1                                                 | ENST00000379375 | -1,168188507 |
| A_33_P3304668 | NM_000088       | COL1A1      | collagen, type I, alpha 1                                    | ENST00000225964 | -1,168864461 |
| A_23_P208293  | NM_001042724    | PVRL2       | poliovirus receptor-related 2 (herpesvirus entry mediator B) | ENST00000252483 | -1,169664925 |
| A_23_P122924  | NM_002192       | INHBA       | inhibin, beta A                                              | ENST00000442711 | -1,17104582  |
| A_23_P6263    | NM_002463       | MX2         | myxovirus (influenza virus) resistance 2 (mouse)             | ENST00000330714 | -1,173263966 |
| A_33_P3734384 | AK097526        | LOC285957   | uncharacterized LOC285957                                    |                 | -1,17376768  |
| A_24_P197964  | NM_014788       | TRIM14      | tripartite motif containing 14                               | ENST00000341469 | -1,174257208 |
| A_23_P214821  | NM_001955       | EDN1        | endothelin 1                                                 | ENST00000379375 | -1,175744694 |
| A_23_P122924  | NM_002192       | INHBA       | inhibin, beta A                                              | ENST00000442711 | -1,17630305  |
| A_21_P0001988 | ENST00000433724 | XLOC_001932 |                                                              | ENST00000433724 | -1,178017711 |
| A_23_P361014  | NM_020856       | TSHZ3       | teashirt zinc finger homeobox 3                              | ENST00000240587 | -1,181403637 |
| A_23_P122924  | NM_002192       | INHBA       | inhibin, beta A                                              | ENST00000442711 | -1,182514015 |
| A_23_P122924  | NM_002192       | INHBA       | inhibin, beta A                                              | ENST00000442711 | -1,182800567 |
| A_23_P122924  | NM_002192       | INHBA       | inhibin, beta A                                              | ENST00000442711 | -1,183667259 |
| A_23_P432947  | NM_013372       | GREM1       | gremlin 1                                                    | ENST00000300177 | -1,184609502 |
| A_23_P142872  | NM_031283       | TCF7L1      | transcription factor 7-like 1 (T-cell specific, HMG-box)     | ENST00000282111 | -1,185223234 |
| A_23_P401547  | NM_015480       | PVRL3       | poliovirus receptor-related 3                                | ENST00000319792 | -1,185893335 |
| A_23_P122924  | NM_002192       | INHBA       | inhibin, beta A                                              | ENST00000442711 | -1,186034074 |
| A_23_P122924  | NM_002192       | INHBA       | inhibin, beta A                                              | ENST00000442711 | -1,187214917 |
| A_23_P320578  | NM_002928       | RGS16       | regulator of G-protein signaling 16                          | ENST00000367558 | -1,187381627 |
| A_23_P214821  | NM_001955       | EDN1        | endothelin 1                                                 | ENST00000379375 | -1,190093618 |
| A_33_P3357609 | NM_001160419    | ZBP1        | Z-DNA binding protein 1                                      | ENST00000343535 | -1,190188059 |
| A_23_P120103  | NM_002252       | KCNS3       | potassium voltage-gated channel, delayed-rectifier, subfam   | ENST00000403915 | -1,190547252 |
| A_21_P0005162 | AK055022        | XLOC_005681 |                                                              |                 | -1,192009795 |
| A_23_P120103  | NM_002252       | KCNS3       | potassium voltage-gated channel, delayed-rectifier, subfam   | ENST00000403915 | -1,193630847 |
| A_23_P122924  | NM_002192       | INHBA       | inhibin, beta A                                              | ENST00000442711 | -1,19732808  |

|               |              |           |                                                             |                 |              |
|---------------|--------------|-----------|-------------------------------------------------------------|-----------------|--------------|
| A_23_P161698  | NM_002422    | MMP3      | matrix metalloproteinase 3 (stromelysin 1, progelatinase)   | ENST00000299855 | -1,198545829 |
| A_23_P59261   | NM_006670    | TPBG      | trophoblast glycoprotein                                    | ENST00000535040 | -1,19962433  |
| A_24_P304071  | NM_001547    | IFIT2     | interferon-induced protein with tetratricopeptide repeats 2 | ENST00000371826 | -1,201682569 |
| A_33_P3381671 | BC016366     | LOC731424 | uncharacterized LOC731424                                   |                 | -1,202455169 |
| A_24_P79617   | NM_014656    | KIAA0040  | KIAA0040                                                    |                 | -1,203737039 |
| A_23_P120103  | NM_002252    | KCNS3     | potassium voltage-gated channel, delayed-rectifier, subfam  | ENST00000403915 | -1,207224683 |
| A_23_P214821  | NM_001955    | EDN1      | endothelin 1                                                | ENST00000379375 | -1,209065141 |
| A_23_P122924  | NM_002192    | INHBA     | inhibin, beta A                                             | ENST00000442711 | -1,216136007 |
| A_23_P156687  | NM_001710    | CFB       | complement factor B                                         | ENST00000546515 | -1,223767569 |
| A_23_P336612  | NM_173528    | C15orf26  | chromosome 15 open reading frame 26                         | ENST00000286732 | -1,225479336 |
| A_33_P3352467 | NM_001050    | SSTR2     | somatostatin receptor 2                                     | ENST00000357585 | -1,228105582 |
| A_23_P152838  | NM_002985    | CCL5      | chemokine (C-C motif) ligand 5                              | ENST00000463941 | -1,233701494 |
| A_23_P120103  | NM_002252    | KCNS3     | potassium voltage-gated channel, delayed-rectifier, subfam  | ENST00000403915 | -1,234362229 |
| A_33_P3220470 | NM_005585    | SMAD6     | SMAD family member 6                                        | ENST00000338426 | -1,238075751 |
| A_33_P3415032 | NM_002232    | KCNA3     | potassium voltage-gated channel, shaker-related subfamily,  | ENST00000369769 | -1,246003638 |
| A_23_P79518   | NM_000576    | IL1B      | interleukin 1, beta                                         | ENST00000263341 | -1,246642703 |
| A_23_P112026  | NM_002164    | IDO1      | indoleamine 2,3-dioxygenase 1                               | ENST00000523779 | -1,248008826 |
| A_23_P79518   | NM_000576    | IL1B      | interleukin 1, beta                                         | ENST00000263341 | -1,249856934 |
| A_23_P79518   | NM_000576    | IL1B      | interleukin 1, beta                                         | ENST00000263341 | -1,249965907 |
| A_23_P79518   | NM_000576    | IL1B      | interleukin 1, beta                                         | ENST00000263341 | -1,251444311 |
| A_23_P79518   | NM_000576    | IL1B      | interleukin 1, beta                                         | ENST00000263341 | -1,253403315 |
| A_33_P3415052 | NM_001172292 | NIPAL4    | NIPA-like domain containing 4                               |                 | -1,257255426 |
| A_23_P79518   | NM_000576    | IL1B      | interleukin 1, beta                                         | ENST00000263341 | -1,259320157 |
| A_23_P121106  | NM_003865    | HESX1     | HESX homeobox 1                                             | ENST00000295934 | -1,2608873   |
| A_23_P112026  | NM_002164    | IDO1      | indoleamine 2,3-dioxygenase 1                               | ENST00000523779 | -1,262183843 |
| A_23_P121106  | NM_003865    | HESX1     | HESX homeobox 1                                             | ENST00000295934 | -1,26374565  |
| A_33_P3313617 | NR_003133    | GBP1P1    | guanylate binding protein 1, interferon-inducible pseudogen | ENST00000513638 | -1,264066388 |
| A_23_P112026  | NM_002164    | IDO1      | indoleamine 2,3-dioxygenase 1                               | ENST00000523779 | -1,264556257 |
| A_24_P411186  | NM_022893    | BCL11A    | B-cell CLL/lymphoma 11A (zinc finger protein)               | ENST00000335712 | -1,271000121 |

|               |                                 |              |                                                             |                 |              |
|---------------|---------------------------------|--------------|-------------------------------------------------------------|-----------------|--------------|
| A_23_P112026  | NM_002164                       | IDO1         | indoleamine 2,3-dioxygenase 1                               | ENST00000523779 | -1,273077734 |
| A_23_P77043   | NM_024764                       | CATSPERB     | cation channel, sperm-associated, beta                      | ENST00000256343 | -1,273516266 |
| A_23_P99891   | NM_022566                       | MESDC1       | mesoderm development candidate 1                            | ENST00000267984 | -1,274212253 |
| A_23_P79518   | NM_000576                       | IL1B         | interleukin 1, beta                                         | ENST00000263341 | -1,280292524 |
| A_33_P3324004 | NM_032965                       | CCL15        | chemokine (C-C motif) ligand 15                             | ENST00000354059 | -1,281263131 |
| A_23_P112026  | NM_002164                       | IDO1         | indoleamine 2,3-dioxygenase 1                               | ENST00000523779 | -1,282732114 |
| A_23_P112026  | NM_002164                       | IDO1         | indoleamine 2,3-dioxygenase 1                               | ENST00000523779 | -1,283619165 |
| A_23_P79518   | NM_000576                       | IL1B         | interleukin 1, beta                                         | ENST00000263341 | -1,287458709 |
| A_23_P301521  | NM_020848                       | KIAA1462     | KIAA1462                                                    | ENST00000375377 | -1,288094923 |
| A_23_P79518   | NM_000576                       | IL1B         | interleukin 1, beta                                         | ENST00000263341 | -1,291755184 |
| A_23_P112026  | NM_002164                       | IDO1         | indoleamine 2,3-dioxygenase 1                               | ENST00000523779 | -1,291895147 |
| A_33_P3258346 | NM_017523                       | XAF1         | XIAP associated factor 1                                    | ENST00000361842 | -1,29525726  |
| A_23_P112026  | NM_002164                       | IDO1         | indoleamine 2,3-dioxygenase 1                               | ENST00000523779 | -1,29915505  |
| A_23_P210690  | NM_021158                       | TRIB3        | tribbles homolog 3 (Drosophila)                             | ENST00000217233 | -1,299629119 |
| A_23_P112026  | NM_002164                       | IDO1         | indoleamine 2,3-dioxygenase 1                               | ENST00000523779 | -1,300207916 |
| A_23_P79518   | NM_000576                       | IL1B         | interleukin 1, beta                                         | ENST00000263341 | -1,30232167  |
| A_33_P3281283 | NM_005226                       | S1PR3        | sphingosine-1-phosphate receptor 3                          | ENST00000375846 | -1,303406518 |
| A_23_P52266   | NM_001548                       | IFIT1        | interferon-induced protein with tetratricopeptide repeats 1 | ENST00000546318 | -1,305033486 |
| A_23_P112026  | NM_002164                       | IDO1         | indoleamine 2,3-dioxygenase 1                               | ENST00000523779 | -1,324460703 |
| A_33_P3329013 | NM_001050                       | SSTR2        | somatostatin receptor 2                                     | ENST00000315332 | -1,326011898 |
| A_23_P206920  | NM_001040114                    | MYH11        | myosin, heavy chain 11, smooth muscle                       | ENST00000396324 | -1,329852029 |
| A_33_P3293446 | NM_020848                       | KIAA1462     | KIAA1462                                                    | ENST00000375377 | -1,331145691 |
| A_33_P3260445 | ENST00000367088                 | DYNLT1       | dynein, light chain, Tctex-type 1                           | ENST00000367088 | -1,334916346 |
| A_23_P121253  | NM_003810                       | TNFSF10      | tumor necrosis factor (ligand) superfamily, member 10       | ENST00000241261 | -1,369286904 |
| A_21_P0010537 | TCONS_I2_0000039(XLOC_I2_000297 |              |                                                             |                 | -1,373131543 |
| A_23_P167328  | NM_001775                       | CD38         | CD38 molecule                                               | ENST00000540195 | -1,373625907 |
| A_23_P8801    | NM_000777                       | CYP3A5       | cytochrome P450, family 3, subfamily A, polypeptide 5       | ENST00000339843 | -1,375716764 |
| A_24_P592012  | NM_025224                       | ZBTB46       | zinc finger and BTB domain containing 46                    | ENST00000245663 | -1,382070886 |
| A_21_P0014592 | XR_110434                       | LOC100507575 | uncharacterized LOC100507575                                |                 | -1,384657032 |

|                |            |           |                                                             |                 |              |
|----------------|------------|-----------|-------------------------------------------------------------|-----------------|--------------|
| A_23_P121253   | NM_003810  | TNFSF10   | tumor necrosis factor (ligand) superfamily, member 10       | ENST00000241261 | -1,38771662  |
| A_33_P3241541  | CR936789   | FSD1L     | fibronectin type III and SPRY domain containing 1-like      | ENST00000374707 | -1,389220302 |
| A_33_P3283611  | NM_001549  | IFIT3     | interferon-induced protein with tetratricopeptide repeats 3 | ENST00000543062 | -1,399599472 |
| A_23_P121253   | NM_003810  | TNFSF10   | tumor necrosis factor (ligand) superfamily, member 10       | ENST00000241261 | -1,401166897 |
| A_23_P121253   | NM_003810  | TNFSF10   | tumor necrosis factor (ligand) superfamily, member 10       | ENST00000241261 | -1,409414185 |
| A_23_P71037    | NM_000600  | IL6       | interleukin 6 (interferon, beta 2)                          | ENST00000485300 | -1,410919972 |
| A_21_P0000695  | NR_037867  | LOC731424 | uncharacterized LOC731424                                   |                 | -1,414239968 |
| A_23_P24004    | NM_001547  | IFIT2     | interferon-induced protein with tetratricopeptide repeats 2 | ENST00000371826 | -1,414534542 |
| A_23_P121253   | NM_003810  | TNFSF10   | tumor necrosis factor (ligand) superfamily, member 10       | ENST00000241261 | -1,427093726 |
| A_24_P557479   | NM_017523  | XAF1      | XIAP associated factor 1                                    | ENST00000361842 | -1,428412805 |
| A_23_P121253   | NM_003810  | TNFSF10   | tumor necrosis factor (ligand) superfamily, member 10       | ENST00000241261 | -1,431569755 |
| A_23_P17481    | NM_023068  | SIGLEC1   | sialic acid binding Ig-like lectin 1, sialoadhesin          | ENST00000202578 | -1,4318905   |
| A_23_P121253   | NM_003810  | TNFSF10   | tumor necrosis factor (ligand) superfamily, member 10       | ENST00000241261 | -1,437297416 |
| A_33_P3226810  | NM_003810  | TNFSF10   | tumor necrosis factor (ligand) superfamily, member 10       | ENST00000241261 | -1,441423773 |
| A_23_P121253   | NM_003810  | TNFSF10   | tumor necrosis factor (ligand) superfamily, member 10       | ENST00000241261 | -1,445869253 |
| A_24_P245815   | NM_020437  | ASPHD2    | aspartate beta-hydroxylase domain containing 2              | ENST00000215906 | -1,447832349 |
| A_23_P121253   | NM_003810  | TNFSF10   | tumor necrosis factor (ligand) superfamily, member 10       | ENST00000241261 | -1,451464566 |
| A_23_P121253   | NM_003810  | TNFSF10   | tumor necrosis factor (ligand) superfamily, member 10       | ENST00000241261 | -1,46247353  |
| A_23_P62647    | NM_003037  | SLAMF1    | signaling lymphocytic activation molecule family member 1   | ENST00000392208 | -1,463630707 |
| A_33_P3418170  | NM_014314  | DDX58     | DEAD (Asp-Glu-Ala-Asp) box polypeptide 58                   | ENST00000379882 | -1,475757276 |
| A_23_P120103   | NM_002252  | KCNS3     | potassium voltage-gated channel, delayed-rectifier, subfam  | ENST00000403915 | -1,479593829 |
| A_33_P3284933  | NM_145659  | IL27      | interleukin 27                                              | ENST00000356897 | -1,490069922 |
| A_19_P00812190 | THC2520127 | Q5D1D6    |                                                             |                 | -1,500508422 |
| A_33_P3343175  | NM_001565  | CXCL10    | chemokine (C-X-C motif) ligand 10                           | ENST00000306602 | -1,54921907  |
| A_23_P207456   | NM_005623  | CCL8      | chemokine (C-C motif) ligand 8                              | ENST00000225840 | -1,552562274 |
| A_23_P49448    | NM_024306  | FA2H      | fatty acid 2-hydroxylase                                    | ENST00000219368 | -1,565192311 |
| A_23_P204087   | NM_016817  | OAS2      | 2'-5'-oligoadenylate synthetase 2, 69/71kDa                 | ENST00000392583 | -1,574459677 |
| A_19_P00808588 | NR_003133  | GBP1P1    |                                                             | ENST00000513638 | -1,58190395  |
| A_33_P3401826  | NM_207315  | CMPK2     | cytidine monophosphate (UMP-CMP) kinase 2, mitochondri      | ENST00000478738 | -1,587770938 |



|               |                 |        |                                                                  |                 |              |
|---------------|-----------------|--------|------------------------------------------------------------------|-----------------|--------------|
| A_23_P76078   | NM_016584       | IL23A  | interleukin 23, alpha subunit p19                                | ENST00000228534 | -1,631824214 |
| A_24_P28722   | NM_080657       | RSAD2  | radical S-adenosyl methionine domain containing 2                | ENST00000382040 | -1,675513347 |
| A_33_P3319925 | ENST00000449753 | IRG1   | immunoresponsive 1 homolog (mouse)                               | ENST00000449753 | -1,682931636 |
| A_33_P3364488 | NM_001170631    | FCAMR  | Fc receptor, IgA, IgM, high affinity                             | ENST00000450945 | -1,742611015 |
| A_23_P125278  | NM_005409       | CXCL11 | chemokine (C-X-C motif) ligand 11                                | ENST00000306621 | -1,84664975  |
| A_23_P35092   | NM_153758       | IL19   | interleukin 19                                                   | ENST00000270218 | -1,854236036 |
| A_23_P45871   | NM_006820       | IFI44L | interferon-induced protein 44-like                               | ENST00000476521 | -1,886202836 |
| A_23_P7560    | NM_002187       | IL12B  | interleukin 12B (natural killer cell stimulatory factor 2, cytot | ENST00000231228 | -2,02095303  |
| A_33_P3341499 | NM_003392       | WNT5A  | wingless-type MMTV integration site family, member 5A            | ENST00000264634 | -2,046366726 |

Comparison of gene expression profiling between MVA-infected macrophages

| ProbeName      | SystematicName | GeneSymbol     | GeneName                                                  | EnsemblID       | MVA vs MØ_logFC |
|----------------|----------------|----------------|-----------------------------------------------------------|-----------------|-----------------|
| A_21_P0000504  | NR_023344      | RNU6ATAC       | RNA, U6atac small nuclear (U12-dependent splicing)        |                 | 2,713233281     |
| A_23_P71774    | NM_002176      | IFNB1          | interferon, beta 1, fibroblast                            | ENST00000380232 | 2,605464723     |
| A_21_P0000513  | NR_026703      | VTRNA1-1       | vault RNA 1-1                                             |                 | 2,313397502     |
| A_21_P0000514  | NR_026704      | VTRNA1-2       | vault RNA 1-2                                             |                 | 2,10530556      |
| A_33_P3242453  | NR_003948      | HCG22          | HLA complex group 22 (non-protein coding)                 | ENST00000412408 | 2,08830707      |
| A_33_P3360072  | NM_001161429   | RANBP3L        | RAN binding protein 3-like                                | ENST00000296604 | 2,066086062     |
| A_23_P388871   | NM_175054      | HIST4H4        | histone cluster 4, H4                                     | ENST00000539745 | 2,059139723     |
| A_33_P3273584  | NR_003023      | SCARNA2        | small Cajal body-specific RNA 2                           |                 | 2,048013363     |
| A_33_P3390107  | NR_003286      | RN18S1         | RNA, 18S ribosomal 1                                      |                 | 2,043382904     |
| A_19_P00322984 | THC2573057     | XLOC_006037    |                                                           |                 | 1,993055186     |
| A_33_P3351851  | NM_003546      | HIST1H4L       | histone cluster 1, H4l                                    | ENST00000355981 | 1,976335555     |
| A_33_P3279708  | NR_002761      | RNU2-2         | RNA, U2 small nuclear 2                                   | ENST00000538098 | 1,927975797     |
| A_33_P3238455  | NR_034009      | SRSF6          | serine/arginine-rich splicing factor 6                    | ENST00000483871 | 1,884752533     |
| A_23_P2283     | NM_013251      | TAC3           | tachykinin 3                                              | ENST00000393867 | 1,882944295     |
| A_19_P00322983 | THC2573057     | XLOC_006037    |                                                           |                 | 1,869379653     |
| A_21_P0005632  | AK130001       | XLOC_006857    |                                                           |                 | 1,819707222     |
| A_33_P3239654  | AK056727       | HCG4B          | HLA complex group 4B (non-protein coding)                 |                 | 1,800595159     |
| A_33_P3410836  | NM_003539      | HIST1H4D       | histone cluster 1, H4d                                    | ENST00000340756 | 1,800543972     |
| A_33_P3506553  | NR_038871      | C21orf91-OT1   | C21orf91 overlapping transcript 1 (non-protein coding)    | ENST00000439392 | 1,799919908     |
| A_24_P408047   | NM_020904      | PLEKHA4        | pleckstrin homology domain containing, family A (phosphoi | ENST00000263265 | 1,784360494     |
| A_24_P918175   | BC009864       | LOC653581      | uncharacterized LOC653581                                 |                 | 1,776950844     |
| A_23_P27013    | NM_024017      | HOXB9          | homeobox B9                                               | ENST00000442657 | 1,759741315     |
| A_33_P3267263  | NR_004400      | RNU1-5         | RNA, U1 small nuclear 5                                   |                 | 1,756835625     |
| A_21_P0011606  | THC2511873     | XLOC_l2_006166 |                                                           |                 | 1,745442705     |
| A_21_P0000584  | NR_030583      | VTRNA2-1       | vault RNA 2-1                                             |                 | 1,73569644      |
| A_33_P3325723  | NM_001822      | CHN1           | chimerin (chimaerin) 1                                    | ENST00000492964 | 1,733913533     |

|                |                 |              |                                                             |                 |             |
|----------------|-----------------|--------------|-------------------------------------------------------------|-----------------|-------------|
| A_21_P0000515  | NR_026705       | VTRNA1-3     | vault RNA 1-3                                               |                 | 1,722159108 |
| A_33_P3297020  | NR_026816       | PSORS1C3     | psoriasis susceptibility 1 candidate 3 (non-protein coding) | ENST00000376242 | 1,718317907 |
| A_23_P28598    | NM_004405       | DLX2         | distal-less homeobox 2                                      | ENST00000234198 | 1,714661837 |
| A_33_P3269924  | ENST00000535831 | HIP1R        | huntingtin interacting protein 1 related                    | ENST00000535831 | 1,699724585 |
| A_21_P0002300  | TCONS_00003905  | XLOC_001710  |                                                             |                 | 1,683646873 |
| A_32_P29118    | NM_152754       | SEMA3D       | sema domain, immunoglobulin domain (Ig), short basic don    | ENST00000284136 | 1,678812738 |
| A_19_P00317016 | THC2573057      | XLOC_006037  |                                                             |                 | 1,677460431 |
| A_23_P359540   | NM_003540       | HIST1H4F     | histone cluster 1, H4f                                      | ENST00000377745 | 1,667448507 |
| A_24_P393958   | NM_007034       | DNAJB4       | DnaJ (Hsp40) homolog, subfamily B, member 4                 | ENST00000370763 | 1,655364408 |
| A_19_P00315502 | ENST00000417112 | P01115       |                                                             | ENST00000417112 | 1,651175321 |
| A_21_P0002602  | TCONS_00004841  | XLOC_001564  |                                                             |                 | 1,646868885 |
| A_23_P337800   | NM_172140       | IL29         | interleukin 29 (interferon, lambda 1)                       | ENST00000333625 | 1,642002126 |
| A_23_P431179   | NM_003538       | HIST1H4A     | histone cluster 1, H4a                                      | ENST00000359907 | 1,634583644 |
| A_21_P0000711  | NR_037969       | LOC100506462 | uncharacterized LOC100506462                                | ENST00000510637 | 1,628591546 |
| A_21_P0001185  | ENST00000431097 | XLOC_001070  |                                                             | ENST00000431097 | 1,628414818 |
| A_33_P3420259  | NR_003287       | RN28S1       | RNA, 28S ribosomal 1                                        |                 | 1,624970049 |
| A_23_P363936   | NM_014278       | HSPA4L       | heat shock 70kDa protein 4-like                             | ENST00000296464 | 1,622341619 |
| A_23_P69179    | NM_018192       | LEPREL1      | leprecan-like 1                                             | ENST00000319332 | 1,616843977 |
| A_21_P0001086  | ENST00000458555 | XLOC_000671  |                                                             | ENST00000458555 | 1,615064164 |
| A_21_P0000384  | NR_003066       | SNORD85      | small nucleolar RNA, C/D box 85                             |                 | 1,598767213 |
| A_23_P369815   | NM_000639       | FASLG        | Fas ligand (TNF superfamily, member 6)                      | ENST00000367721 | 1,595414462 |
| A_33_P3336632  | NR_003287       | RN28S1       | RNA, 28S ribosomal 1                                        |                 | 1,584217634 |
| A_23_P133739   | NM_148959       | HUS1B        | HUS1 checkpoint homolog b (S. pombe)                        | ENST00000380907 | 1,57624785  |
| A_23_P436281   | NM_001034077    | HIST2H4B     | histone cluster 2, H4b                                      | ENST00000392933 | 1,573672411 |
| A_23_P380318   | NM_001965       | EGR4         | early growth response 4                                     | ENST00000436467 | 1,564490593 |
| A_21_P0000372  | NR_003042       | SNORD45C     | small nucleolar RNA, C/D box 45C                            | ENST00000471759 | 1,559690452 |
| A_23_P369815   | NM_000639       | FASLG        | Fas ligand (TNF superfamily, member 6)                      | ENST00000367721 | 1,55746953  |
| A_33_P3359763  | ENST00000466317 | FLCN         | folliculin                                                  | ENST00000466317 | 1,55530952  |
| A_21_P0000655  | NR_036511       | LOC100129917 | uncharacterized LOC100129917                                | ENST00000503185 | 1,545677787 |

|               |                  |                |                                                      |                 |             |
|---------------|------------------|----------------|------------------------------------------------------|-----------------|-------------|
| A_33_P3323463 | ENST00000532091  | HSPA8          | heat shock 70kDa protein 8                           | ENST00000532091 | 1,538861548 |
| A_21_P0000487 | NR_004378        | SNORD94        | small nucleolar RNA, C/D box 94                      |                 | 1,538102082 |
| A_21_P0001096 | ENST00000442889  | XLOC_000691    |                                                      | ENST00000442889 | 1,532993348 |
| A_33_P3239087 | XR_112085        | FAM87B         | family with sequence similarity 87, member B         |                 | 1,523858111 |
| A_21_P0000247 | NR_002443        | SNORD18C       | small nucleolar RNA, C/D box 18C                     |                 | 1,516128128 |
| A_33_P3404989 | NM_003536        | HIST1H3H       | histone cluster 1, H3h                               | ENST00000369163 | 1,516094983 |
| A_33_P3668839 | NR_036539        | LOC644656      | uncharacterized LOC644656                            |                 | 1,511128836 |
| A_23_P323685  | NM_003543        | HIST1H4H       | histone cluster 1, H4h                               | ENST00000377727 | 1,501525472 |
| A_23_P214080  | NM_001964        | EGR1           | early growth response 1                              | ENST00000239938 | 1,494350768 |
| A_23_P407080  | NM_173489        | HEATR7B2       | HEAT repeat family member 7B2                        | ENST00000399564 | 1,490253679 |
| A_33_P3359791 | ENST00000484389  | TDRD3          | tudor domain containing 3                            | ENST00000484389 | 1,473488168 |
| A_21_P0005609 | NR_024586        | LOC100216545   | uncharacterized LOC100216545                         |                 | 1,471600867 |
| A_33_P3362652 | NM_001005514     | OR5H14         | olfactory receptor, family 5, subfamily H, member 14 | ENST00000437310 | 1,469165338 |
| A_21_P0000283 | NR_002741        | SNORD53        | small nucleolar RNA, C/D box 53                      |                 | 1,467390418 |
| A_21_P0011258 | TCONS_I2_0000792 | XLOC_I2_004315 |                                                      |                 | 1,467278465 |
| A_21_P0013351 | TCONS_I2_0002692 | XLOC_I2_014024 |                                                      |                 | 1,466602654 |
| A_33_P3344229 | NM_003538        | HIST1H4A       | histone cluster 1, H4a                               | ENST00000359907 | 1,465062409 |
| A_33_P3383065 | NM_001195150     | LOC100130705   | uncharacterized LOC100130705                         |                 | 1,463886609 |
| A_33_P3406778 | ENST00000405431  | PGF            | placental growth factor                              | ENST00000405431 | 1,458047606 |
| A_21_P0007374 | AK054718         | XLOC_009507    |                                                      |                 | 1,454442733 |
| A_24_P20873   | NM_003495        | HIST1H4I       | histone cluster 1, H4i                               | ENST00000354348 | 1,45048089  |
| A_21_P0001283 | TCONS_00000890   | XLOC_000141    |                                                      |                 | 1,446082304 |
| A_21_P0014744 | ENST00000442130  | LOC100287049   |                                                      | ENST00000442130 | 1,438102307 |
| A_33_P3870906 | NR_038320        | LOC100507634   | uncharacterized LOC100507634                         |                 | 1,436621596 |
| A_24_P125839  | NM_017447        | C21orf91       | chromosome 21 open reading frame 91                  | ENST00000400559 | 1,436124231 |
| A_33_P3271530 | NM_024989        | PGAP1          | post-GPI attachment to proteins 1                    | ENST00000485830 | 1,430242723 |
| A_21_P0008109 | AF339799         | XLOC_010477    |                                                      | ENST00000434547 | 1,428591068 |
| A_21_P0007092 | THC2655298       | XLOC_008691    |                                                      |                 | 1,419742808 |
| A_23_P346327  | NR_026674        | FLJ30679       | uncharacterized protein FLJ30679                     |                 | 1,41592174  |

|               |                 |                |                                          |                 |             |
|---------------|-----------------|----------------|------------------------------------------|-----------------|-------------|
| A_23_P429478  | NM_153038       | CCDC140        | coiled-coil domain containing 140        | ENST00000295226 | 1,415392625 |
| A_33_P3292043 | NM_001005214    | LRRCS2         | leucine rich repeat containing 52        | ENST00000294818 | 1,414997863 |
| A_21_P0004299 | TCONS_00010096  | XLOC_004556    |                                          |                 | 1,412473171 |
| A_21_P0007959 | AF339799        | XLOC_010477    |                                          | ENST00000434547 | 1,406518516 |
| A_23_P89327   | NM_020652       | ZNF286A        | zinc finger protein 286A                 | ENST00000421016 | 1,404743166 |
| A_21_P0000259 | NR_002565       | SNORD25        | small nucleolar RNA, C/D box 25          |                 | 1,401660916 |
| A_24_P93736   | NR_024341       | FLJ40292       | uncharacterized LOC643210                |                 | 1,401307473 |
| A_24_P608302  | BC012894        | LOC388796      | uncharacterized LOC388796                |                 | 1,395837821 |
| A_33_P3227217 | NR_002989       | SNORA81        | small nucleolar RNA, H/ACA box 81        | ENST00000475409 | 1,395621476 |
| A_23_P97096   | NM_014359       | OPTC           | opticin                                  | ENST00000448911 | 1,393917053 |
| A_21_P0014898 | XR_132888       | LOC100652951   | uncharacterized LOC100652951             |                 | 1,390345002 |
| A_21_P0010928 | ENST00000429110 | XLOC_I2_001731 |                                          | ENST00000429110 | 1,388659939 |
| A_23_P108743  | NM_152381       | XIRP2          | xin actin-binding repeat containing 2    | ENST00000295237 | 1,387975856 |
| A_23_P167585  | NM_005260       | GDF9           | growth differentiation factor 9          | ENST00000296875 | 1,386943886 |
| A_23_P369815  | NM_000639       | FASLG          | Fas ligand (TNF superfamily, member 6)   | ENST00000367721 | 1,383139168 |
| A_21_P0000023 | NM_001159749    | RIOK2          | RIO kinase 2 (yeast)                     | ENST00000508447 | 1,383086206 |
| A_33_P3229246 | NM_003528       | HIST2H2BE      | histone cluster 2, H2be                  | ENST00000369155 | 1,382430444 |
| A_24_P355944  | NM_004093       | EFNB2          | ephrin-B2                                | ENST00000245323 | 1,382182523 |
| A_33_P3424566 | XR_108650       | FLJ38717       | FLJ38717 protein                         |                 | 1,377056674 |
| A_32_P430695  | NM_178339       | C3orf35        | chromosome 3 open reading frame 35       | ENST00000452017 | 1,374593931 |
| A_33_P3209254 | AK097937        | RPS16P5        | ribosomal protein S16 pseudogene 5       |                 | 1,374366093 |
| A_33_P3294583 | NR_002799       | LOC256880      | uncharacterized LOC256880                |                 | 1,371950379 |
| A_33_P3351686 | NM_001114938    | CCDC17         | coiled-coil domain containing 17         | ENST00000479529 | 1,370938608 |
| A_23_P151294  | NM_000619       | IFNG           | interferon, gamma                        | ENST00000229135 | 1,370267543 |
| A_32_P205944  | NM_005054       | RGPD5          | RANBP2-like and GRIP domain containing 5 | ENST00000302558 | 1,370243936 |
| A_23_P406071  | ENST00000408913 | ZFP36L1        | zinc finger protein 36, C3H type-like 1  | ENST00000408913 | 1,367409866 |
| A_33_P3305521 | AB029007        | ZNF507         | zinc finger protein 507                  |                 | 1,366835673 |
| A_23_P32233   | NM_004235       | KLF4           | Kruppel-like factor 4 (gut)              | ENST00000374672 | 1,364989925 |
| A_33_P3382291 | NR_028119       | LOC100133957   | uncharacterized LOC100133957             |                 | 1,363798237 |



|               |                 |              |                                                               |                 |             |
|---------------|-----------------|--------------|---------------------------------------------------------------|-----------------|-------------|
| A_21_P0006410 | ENST00000420865 | XLOC_007911  |                                                               | ENST00000420865 | 1,356628457 |
| A_21_P0006551 | AK098726        | XLOC_008244  |                                                               |                 | 1,356214226 |
| A_33_P3413667 | NM_001136001    | ABL2         | v-abl Abelson murine leukemia viral oncogene homolog 2        | ENST00000392043 | 1,353693405 |
| A_23_P500501  | NM_000142       | FGFR3        | fibroblast growth factor receptor 3                           | ENST00000260795 | 1,351122902 |
| A_33_P3327519 | NR_002915       | SNORA74A     | small nucleolar RNA, H/ACA box 74A                            |                 | 1,350820528 |
| A_21_P0000708 | NR_037933       | C14orf55     | metalloproteinase-disintegrin 1-2 pseudogene                  | ENST00000556964 | 1,350599909 |
| A_23_P30805   | NM_021968       | HIST1H4J     | histone cluster 1, H4j                                        | ENST00000355057 | 1,346397454 |
| A_21_P0000243 | NR_002439       | SNORD43      | small nucleolar RNA, C/D box 43                               | ENST00000453303 | 1,346322276 |
| A_21_P0004556 | THC2660784      | XLOC_004848  |                                                               |                 | 1,345617566 |
| A_21_P0010509 | NR_024455       | LOC100133612 | uncharacterized LOC100133612                                  |                 | 1,34375926  |
| A_33_P3593774 | NM_003629       | PIK3R3       | phosphoinositide-3-kinase, regulatory subunit 3 (gamma)       | ENST00000423209 | 1,342742112 |
| A_24_P85942   | NM_181453       | GCC2         | GRIP and coiled-coil domain containing 2                      | ENST00000309863 | 1,336281377 |
| A_33_P3389394 | NR_002312       | RPPH1        | ribonuclease P RNA component H1                               | ENST00000554988 | 1,335982095 |
| A_33_P3274622 | NR_029401       | LOC731275    | uncharacterized LOC731275                                     | ENST00000417964 | 1,335617969 |
| A_23_P30813   | NM_003541       | HIST1H4K     | histone cluster 1, H4k                                        | ENST00000357549 | 1,334408662 |
| A_33_P3220976 | BC043212        | EFHB         | EF-hand domain family, member B                               | ENST00000474780 | 1,33047458  |
| A_33_P3384775 | ENST00000398497 | ZNF295       | zinc finger protein 295                                       | ENST00000398497 | 1,328865742 |
| A_21_P0005705 | TCONS_00014729  | XLOC_006817  |                                                               |                 | 1,32536891  |
| A_21_P0006879 | TCONS_00018225  | XLOC_008503  |                                                               |                 | 1,324529037 |
| A_21_P0007824 | TCONS_00021074  | XLOC_009668  |                                                               |                 | 1,322331281 |
| A_33_P3274034 | ENST00000316024 | WRAP53       | WD repeat containing, antisense to TP53                       | ENST00000316024 | 1,319738639 |
| A_21_P0007077 | TCONS_00018816  | XLOC_008613  |                                                               |                 | 1,316716572 |
| A_23_P151294  | NM_000619       | IFNG         | interferon, gamma                                             | ENST00000229135 | 1,313672923 |
| A_21_P0005521 | NR_024586       | LOC100216545 | uncharacterized LOC100216545                                  |                 | 1,312217106 |
| A_33_P3299865 | NM_003541       | HIST1H4K     | histone cluster 1, H4k                                        | ENST00000355057 | 1,311942902 |
| A_21_P0000303 | NR_002921       | SNORA75      | small nucleolar RNA, H/ACA box 75                             |                 | 1,311033453 |
| A_23_P47199   | NM_018484       | SLC22A11     | solute carrier family 22 (organic anion/urate transporter), n | ENST00000301891 | 1,30795888  |
| A_33_P3619171 | NM_021127       | PMAIP1       | phorbol-12-myristate-13-acetate-induced protein 1             | ENST00000269518 | 1,307635725 |
| A_21_P0000390 | NR_003074       | SNORD92      | small nucleolar RNA, C/D box 92                               |                 | 1,306450284 |

|               |                 |                |                                                                   |                 |             |
|---------------|-----------------|----------------|-------------------------------------------------------------------|-----------------|-------------|
| A_33_P3332348 | NR_002715       | RN7SL1         | RNA, 7SL, cytoplasmic 1                                           | ENST00000553637 | 1,305152303 |
| A_23_P211056  | NM_013329       | GCFC1          | GC-rich sequence DNA-binding factor 1                             | ENST00000497873 | 1,305102412 |
| A_23_P110430  | NM_002448       | MSX1           | msh homeobox 1                                                    | ENST00000382723 | 1,303470538 |
| A_33_P3317387 | BC033823        | DNAJC3         | DnaJ (Hsp40) homolog, subfamily C, member 3                       |                 | 1,30298858  |
| A_23_P57658   | NM_020386       | HRASLS         | HRAS-like suppressor                                              | ENST00000264735 | 1,294321683 |
| A_24_P333697  | NM_015596       | KLK13          | kallikrein-related peptidase 13                                   | ENST00000376799 | 1,293408545 |
| A_21_P0013772 | ENST00000453317 | XLOC_I2_015561 |                                                                   | ENST00000453317 | 1,291149542 |
| A_33_P3211513 | NM_001162407    | CLK1           | CDC-like kinase 1                                                 | ENST00000357369 | 1,281636365 |
| A_23_P369815  | NM_000639       | FASLG          | Fas ligand (TNF superfamily, member 6)                            | ENST00000367721 | 1,280960953 |
| A_33_P3398074 | AF132201        | LOC100133319   | PRO1804                                                           |                 | 1,276277209 |
| A_21_P0009189 | AL049275        | DKFZp564H213   | uncharacterized LOC440432                                         |                 | 1,275907357 |
| A_33_P3270271 | BC029817        | LOC440386      | uncharacterized LOC440386                                         |                 | 1,270692504 |
| A_23_P108932  | NR_002229       | RPL23AP32      | ribosomal protein L23a pseudogene 32                              |                 | 1,270068332 |
| A_23_P56746   | NM_004460       | FAP            | fibroblast activation protein, alpha                              | ENST00000188790 | 1,268144169 |
| A_23_P83149   | NM_016014       | FAM108B1       | family with sequence similarity 108, member B1                    | ENST00000377041 | 1,26527255  |
| A_23_P151294  | NM_000619       | IFNG           | interferon, gamma                                                 | ENST00000229135 | 1,264522579 |
| A_33_P3630780 | AL833160        | LOC286058      | uncharacterized LOC286058                                         |                 | 1,262719898 |
| A_21_P0001504 | TCONS_00001494  | XLOC_000833    |                                                                   |                 | 1,262202388 |
| A_21_P0014591 | XR_110418       | LOC100507280   | uncharacterized LOC100507280                                      |                 | 1,258786461 |
| A_21_P0008892 | TCONS_00024294  | XLOC_011772    |                                                                   |                 | 1,256969389 |
| A_23_P151294  | NM_000619       | IFNG           | interferon, gamma                                                 | ENST00000229135 | 1,252374541 |
| A_21_P0000096 | NM_019609       | CPXM1          | carboxypeptidase X (M14 family), member 1                         |                 | 1,250521737 |
| A_32_P886589  | NM_175895       | C12orf61       | chromosome 12 open reading frame 61                               | ENST00000408887 | 1,250129782 |
| A_23_P208210  | NM_014650       | ZNF432         | zinc finger protein 432                                           | ENST00000221315 | 1,250117206 |
| A_21_P0010592 | NR_033908       | LOC100288069   | general transcription factor Ili pseudogene                       | ENST00000447412 | 1,247003794 |
| A_33_P3294031 | NR_002728       | KCNQ1OT1       | KCNQ1 opposite strand/antisense transcript 1 (non-protein coding) |                 | 1,245614857 |
| A_32_P195647  | NM_030624       | KLHL15         | kelch-like 15 (Drosophila)                                        | ENST00000328046 | 1,24541807  |
| A_33_P3378935 | AB209007        | RBM14          | RNA binding motif protein 14                                      | ENST00000409372 | 1,245181698 |
| A_23_P430792  | NM_152781       | C17orf66       | chromosome 17 open reading frame 66                               | ENST00000462028 | 1,241625538 |

|               |                 |             |                                                             |                 |             |
|---------------|-----------------|-------------|-------------------------------------------------------------|-----------------|-------------|
| A_33_P3266719 | NM_017628       | TET2        | tet methylcytosine dioxygenase 2                            | ENST00000535110 | 1,239640921 |
| A_23_P120170  | NM_145702       | TIGD1       | tigger transposable element derived 1                       | ENST00000408957 | 1,239028815 |
| A_33_P3346032 | AK124942        | LOC727808   | uncharacterized LOC727808                                   |                 | 1,238995207 |
| A_33_P3236272 | NM_001173539    | BANP        | BTG3 associated nuclear protein                             | ENST00000286122 | 1,237716388 |
| A_21_P0002937 | TCONS_00005965  | XLOC_002597 |                                                             |                 | 1,23626549  |
| A_21_P0004024 | TCONS_00009444  | XLOC_004456 |                                                             |                 | 1,235192933 |
| A_23_P414308  | NM_144606       | FLCN        | folliculin                                                  | ENST00000389169 | 1,233486632 |
| A_23_P381368  | NM_002148       | HOXD10      | homeobox D10                                                | ENST00000249501 | 1,228960878 |
| A_33_P3264667 | NM_183374       | CYP26C1     | cytochrome P450, family 26, subfamily C, polypeptide 1      | ENST00000285949 | 1,228542736 |
| A_23_P30254   | NM_006622       | PLK2        | polo-like kinase 2                                          | ENST00000502671 | 1,227533923 |
| A_21_P0006658 | THC2503064      | XLOC_008405 |                                                             |                 | 1,227263242 |
| A_33_P3271105 | NM_001135654    | PABPC4      | poly(A) binding protein, cytoplasmic 4 (inducible form)     | ENST00000531243 | 1,226865357 |
| A_23_P364324  | NM_152701       | ABCA13      | ATP-binding cassette, sub-family A (ABC1), member 13        | ENST00000435803 | 1,226171007 |
| A_33_P3856949 | AK096098        | LOC284513   | uncharacterized LOC284513                                   |                 | 1,226150174 |
| A_21_P0004456 | AK054753        | XLOC_005049 |                                                             |                 | 1,224311819 |
| A_23_P149050  | NR_024321       | LINC00115   | long intergenic non-protein coding RNA 115                  |                 | 1,223956338 |
| A_23_P144476  | NM_199327       | SPRY1       | sprouty homolog 1, antagonist of FGF signaling (Drosophila) | ENST00000339241 | 1,223294073 |
| A_21_P0009763 | TCONS_00027300  | XLOC_013300 |                                                             |                 | 1,222390055 |
| A_21_P0001030 | ENST00000424181 | XLOC_000468 |                                                             | ENST00000424181 | 1,222040603 |
| A_23_P93602   | NM_001010905    | C6orf58     | chromosome 6 open reading frame 58                          | ENST00000329722 | 1,221311799 |
| A_23_P369815  | NM_000639       | FASLG       | Fas ligand (TNF superfamily, member 6)                      | ENST00000367721 | 1,22130572  |
| A_23_P108932  | NR_002229       | RPL23AP32   | ribosomal protein L23a pseudogene 32                        |                 | 1,213987011 |
| A_33_P3285764 | ENST00000467013 | EPHB1       | EPH receptor B1                                             | ENST00000467013 | 1,211251525 |
| A_23_P214079  | NM_003122       | SPINK1      | serine peptidase inhibitor, Kazal type 1                    | ENST00000505722 | 1,210715891 |
| A_33_P3271121 | ENST00000484097 | SH3BP4      | SH3-domain binding protein 4                                | ENST00000484097 | 1,209731062 |
| A_24_P925635  | NR_024271       | SEPT7P2     | septin 7 pseudogene 2                                       | ENST00000338231 | 1,209651672 |
| A_23_P67278   | NM_005815       | ZNF443      | zinc finger protein 443                                     | ENST00000411622 | 1,209014264 |
| A_23_P118392  | NM_016084       | RASD1       | RAS, dexamethasone-induced 1                                | ENST00000225688 | 1,208633109 |
| A_33_P3254306 | ENST00000389168 | FLCN        | folliculin                                                  | ENST00000389168 | 1,206776522 |

|               |                 |              |                                                                                 |                 |             |
|---------------|-----------------|--------------|---------------------------------------------------------------------------------|-----------------|-------------|
| A_23_P108501  | NM_004438       | EPHA4        | EPH receptor A4                                                                 | ENST00000392071 | 1,205406087 |
| A_33_P3394517 | NM_015092       | SMG1         | smg-1 homolog, phosphatidylinositol 3-kinase-related kinase                     | ENST00000454049 | 1,204861786 |
| A_21_P0006262 | THC2746760      | XLOC_007676  |                                                                                 |                 | 1,203843665 |
| A_23_P118392  | NM_016084       | RASD1        | RAS, dexamethasone-induced 1                                                    | ENST00000225688 | 1,201260045 |
| A_33_P3692756 | NR_027374       | LOC723809    | uncharacterized LOC723809                                                       |                 | 1,200646345 |
| A_21_P0008557 | BC034325        | XLOC_011278  |                                                                                 |                 | 1,20033448  |
| A_23_P203829  | NM_015394       | ZNF10        | zinc finger protein 10                                                          | ENST00000426665 | 1,199917766 |
| A_23_P144337  | NM_012118       | CCRN4L       | CCR4 carbon catabolite repression 4-like ( <i>S. cerevisiae</i> )               | ENST00000515616 | 1,199327093 |
| A_24_P389285  | NR_027330       | C7orf54      | chromosome 7 open reading frame 54                                              | ENST00000467238 | 1,198712953 |
| A_23_P118392  | NM_016084       | RASD1        | RAS, dexamethasone-induced 1                                                    | ENST00000225688 | 1,198245846 |
| A_33_P3396831 | ENST00000368256 | CCT3         | chaperonin containing TCP1, subunit 3 (gamma)                                   | ENST00000368256 | 1,197246417 |
| A_33_P3210119 | NR_027822       | HLA-L        | major histocompatibility complex, class I, L, pseudogene                        | ENST00000491405 | 1,195612787 |
| A_33_P3330906 | XR_110087       | FAM87A       | family with sequence similarity 87, member A                                    |                 | 1,19494032  |
| A_33_P3243524 | NM_001164389    | RAPGEF6      | Rap guanine nucleotide exchange factor (GEF) 6                                  | ENST00000308008 | 1,193790609 |
| A_33_P3270793 | NM_145175       | FAM84A       | family with sequence similarity 84, member A                                    | ENST00000359969 | 1,193404861 |
| A_23_P216935  | NR_026677       | MIR600HG     | MIR600 host gene (non-protein coding)                                           | ENST00000545631 | 1,192296142 |
| A_23_P151294  | NM_000619       | IFNG         | interferon, gamma                                                               | ENST00000229135 | 1,191996899 |
| A_21_P0003088 | TCONS_00006375  | XLOC_002995  |                                                                                 |                 | 1,191748557 |
| A_21_P0009632 | TCONS_00026722  | XLOC_012857  |                                                                                 |                 | 1,189156668 |
| A_33_P3346688 | ENST00000527983 | HSPA8        | heat shock 70kDa protein 8                                                      | ENST00000527983 | 1,188025567 |
| A_21_P0005793 | BC024246        | XLOC_006985  |                                                                                 |                 | 1,18690868  |
| A_24_P409126  | ENST00000378383 | FNDC3A       | fibronectin type III domain containing 3A                                       | ENST00000378383 | 1,186440065 |
| A_33_P3377239 | NR_026885       | LOC100270804 | uncharacterized LOC100270804                                                    |                 | 1,185777464 |
| A_23_P55388   | NM_018143       | KLHL11       | kelch-like 11 ( <i>Drosophila</i> )                                             | ENST00000540254 | 1,185414569 |
| A_23_P45955   | NM_014466       | TEKT2        | tektin 2 (testicular)                                                           | ENST00000469024 | 1,185374497 |
| A_33_P3520835 | AK123449        | FLJ41455     | uncharacterized LOC441441                                                       |                 | 1,185332644 |
| A_33_P3407636 | AK296555        | YWHAE        | tyrosine 3-monooxygenase/tryptophan 5-monooxygenase activation protein, epsilon |                 | 1,184745387 |
| A_21_P0005491 | THC2719594      | XLOC_006415  |                                                                                 |                 | 1,184378154 |
| A_23_P108932  | NR_002229       | RPL23AP32    | ribosomal protein L23a pseudogene 32                                            |                 | 1,179857497 |

|                |                 |              |                                                               |                 |             |
|----------------|-----------------|--------------|---------------------------------------------------------------|-----------------|-------------|
| A_21_P0006202  | TCONS_00016119  | XLOC_007506  |                                                               |                 | 1,177709798 |
| A_23_P108932   | NR_002229       | RPL23AP32    | ribosomal protein L23a pseudogene 32                          |                 | 1,170717694 |
| A_23_P108501   | NM_004438       | EPHA4        | EPH receptor A4                                               | ENST00000392071 | 1,170464706 |
| A_32_P34920    | NM_004472       | FOXD1        | forkhead box D1                                               |                 | 1,169462529 |
| A_33_P3352632  | AK096262        | LOC728147    | uncharacterized LOC728147                                     |                 | 1,169014035 |
| A_21_P0007635  | TCONS_00020579  | XLOC_009895  |                                                               |                 | 1,168148629 |
| A_23_P218626   | NM_080741       | NEU4         | sialidase 4                                                   | ENST00000472793 | 1,168060822 |
| A_23_P45424    | NM_012278       | ITGB1BP2     | integrin beta 1 binding protein (melusin) 2                   | ENST00000373829 | 1,167894708 |
| A_21_P0007693  | TCONS_00020732  | XLOC_010031  |                                                               |                 | 1,167824622 |
| A_33_P3400244  | NM_032752       | ZNF496       | zinc finger protein 496                                       | ENST00000477903 | 1,167667821 |
| A_24_P23445    | NR_029422       | RNU12        | RNA, U12 small nuclear                                        |                 | 1,166817604 |
| A_23_P429998   | NM_006732       | FOSB         | FBJ murine osteosarcoma viral oncogene homolog B              | ENST00000353609 | 1,164812787 |
| A_23_P151294   | NM_000619       | IFNG         | interferon, gamma                                             | ENST00000229135 | 1,163454349 |
| A_21_P0000040  | NM_001164313    | ZBTB24       | zinc finger and BTB domain containing 24                      |                 | 1,162091673 |
| A_21_P0005397  | TCONS_00013523  | XLOC_006163  |                                                               |                 | 1,15797529  |
| A_19_P00317318 | NM_001145664    | RFX8         |                                                               | ENST00000540519 | 1,156736671 |
| A_21_P0002348  | TCONS_00004017  | XLOC_001856  |                                                               |                 | 1,156176143 |
| A_21_P0013834  | NM_001017417    | CT45A1       | cancer/testis antigen family 45, member A1                    | ENST00000495729 | 1,156165388 |
| A_21_P0003908  | TCONS_00009166  | XLOC_004165  |                                                               |                 | 1,154079779 |
| A_23_P130764   | NM_170720       | KCNJ14       | potassium inwardly-rectifying channel, subfamily J, member 14 | ENST00000391884 | 1,153967532 |
| A_23_P38206    | NM_032356       | LSMD1        | LSM domain containing 1                                       | ENST00000333775 | 1,153504911 |
| A_33_P3273767  | ENST00000442973 | GJB7         | gap junction protein, beta 7, 25kDa                           | ENST00000442973 | 1,152968144 |
| A_33_P3230269  | NM_198182       | GRHL1        | grainyhead-like 1 (Drosophila)                                | ENST00000324907 | 1,150254829 |
| A_33_P3290949  | ENST00000487043 | PTCD3        | Pentatricopeptide repeat domain 3                             | ENST00000487043 | 1,147462531 |
| A_24_P290927   | NM_014847       | UBAP2L       | ubiquitin associated protein 2-like                           | ENST00000441890 | 1,147213942 |
| A_32_P226205   | NM_033400       | ZFHX2        | zinc finger homeobox 2                                        |                 | 1,146856978 |
| A_33_P3330079  | XR_110532       | LOC100128242 | uncharacterized LOC100128242                                  | ENST00000533341 | 1,145373092 |
| A_24_P390909   | NM_181882       | PRX          | periaxin                                                      | ENST00000341562 | 1,143363267 |
| A_21_P0002430  | THC2614847      | XLOC_002066  |                                                               |                 | 1,142075117 |



|               |                 |             |                                                              |                 |             |
|---------------|-----------------|-------------|--------------------------------------------------------------|-----------------|-------------|
| A_23_P118392  | NM_016084       | RASD1       | RAS, dexamethasone-induced 1                                 | ENST00000225688 | 1,141422343 |
| A_33_P3420020 | NM_001130858    | PIIP5K1     | diphosphoinositol pentakisphosphate kinase 1                 | ENST00000335092 | 1,140060202 |
| A_23_P108501  | NM_004438       | EPHA4       | EPH receptor A4                                              | ENST00000392071 | 1,139997293 |
| A_33_P3648417 | BE972465        | SNORA55     | small nucleolar RNA, H/ACA box 55                            |                 | 1,13927047  |
| A_23_P108501  | NM_004438       | EPHA4       | EPH receptor A4                                              | ENST00000392071 | 1,136481519 |
| A_33_P3247838 | NM_001136501    | ZNF844      | zinc finger protein 844                                      | ENST00000439326 | 1,135905323 |
| A_33_P3358163 | NM_018958       | C15orf2     | chromosome 15 open reading frame 2                           | ENST00000329468 | 1,135521445 |
| A_33_P3403254 | NM_001080404    | ZNF878      | zinc finger protein 878                                      | ENST00000440730 | 1,135046856 |
| A_24_P398810  | NM_001969       | EIF5        | eukaryotic translation initiation factor 5                   | ENST00000216554 | 1,13446238  |
| A_23_P118392  | NM_016084       | RASD1       | RAS, dexamethasone-induced 1                                 | ENST00000225688 | 1,134445398 |
| A_33_P3399988 | BC035659        | HCP5B       | HLA complex P5B (non-protein coding)                         |                 | 1,134437509 |
| A_23_P90062   | NM_006145       | DNAJB1      | DnaJ (Hsp40) homolog, subfamily B, member 1                  | ENST00000254322 | 1,133207751 |
| A_23_P369815  | NM_000639       | FASLG       | Fas ligand (TNF superfamily, member 6)                       | ENST00000367721 | 1,132032833 |
| A_23_P369815  | NM_000639       | FASLG       | Fas ligand (TNF superfamily, member 6)                       | ENST00000367721 | 1,131779789 |
| A_21_P0002502 | TCONS_00004440  | XLOC_002313 |                                                              |                 | 1,131388812 |
| A_23_P92672   | NM_002538       | OCLN        | occludin                                                     | ENST00000514370 | 1,131086219 |
| A_32_P64475   | NM_152608       | C1orf55     | chromosome 1 open reading frame 55                           | ENST00000366817 | 1,129536292 |
| A_23_P162288  | NM_005379       | MYO1A       | myosin IA                                                    | ENST00000544473 | 1,128952257 |
| A_33_P3409849 | ENST00000342887 | C12orf63    | chromosome 12 open reading frame 63                          | ENST00000342887 | 1,128129604 |
| A_21_P0001756 | TCONS_00002581  | XLOC_001195 |                                                              |                 | 1,127451046 |
| A_23_P108501  | NM_004438       | EPHA4       | EPH receptor A4                                              | ENST00000392071 | 1,126651445 |
| A_24_P55148   | NM_021058       | HIST1H2BJ   | histone cluster 1, H2bj                                      | ENST00000339812 | 1,126023256 |
| A_21_P0007089 | ENST00000455566 | PPP2R2D     | protein phosphatase 2, regulatory subunit B, delta           | ENST00000455566 | 1,12504054  |
| A_24_P67898   | ENST00000370094 | MGEA5       | meningioma expressed antigen 5 (hyaluronidase)               | ENST00000370094 | 1,123349816 |
| A_33_P3281532 | NM_022780       | RMND5A      | required for meiotic nuclear division 5 homolog A (S. cerevi | ENST00000283632 | 1,12164641  |
| A_21_P0004619 | ENST00000414364 | XLOC_005927 |                                                              | ENST00000414364 | 1,121303976 |
| A_33_P3237210 | AF445025        | SLC35A4     | solute carrier family 35, member A4                          | ENST00000514199 | 1,119783583 |
| A_33_P3375451 | NM_025081       | NYNRIN      | NYN domain and retroviral integrase containing               | ENST00000206466 | 1,117898193 |
| A_23_P43337   | NM_144966       | FREM1       | FRAS1 related extracellular matrix 1                         | ENST00000380880 | 1,11663736  |

|               |                 |              |                                                                 |                 |             |
|---------------|-----------------|--------------|-----------------------------------------------------------------|-----------------|-------------|
| A_33_P3363120 | NR_004387       | SCARNA10     | small Cajal body-specific RNA 10                                |                 | 1,116375125 |
| A_23_P118392  | NM_016084       | RASD1        | RAS, dexamethasone-induced 1                                    | ENST00000225688 | 1,11385444  |
| A_23_P405110  | NM_033313       | CDC14A       | CDC14 cell division cycle 14 homolog A ( <i>S. cerevisiae</i> ) | ENST00000370124 | 1,113423515 |
| A_33_P3229335 | NM_175055       | HIST3H2BB    | histone cluster 3, H2bb                                         | ENST00000369160 | 1,113062879 |
| A_23_P83347   | NM_145051       | RNF183       | ring finger protein 183                                         | ENST00000478815 | 1,113027446 |
| A_23_P118392  | NM_016084       | RASD1        | RAS, dexamethasone-induced 1                                    | ENST00000225688 | 1,112523312 |
| A_21_P0002617 | TCONS_00004935  | XLOC_001732  |                                                                 |                 | 1,112488812 |
| A_23_P118392  | NM_016084       | RASD1        | RAS, dexamethasone-induced 1                                    | ENST00000225688 | 1,112396107 |
| A_21_P0007530 | TCONS_00020350  | XLOC_009681  |                                                                 |                 | 1,11204169  |
| A_24_P380679  | NM_182597       | C7orf53      | chromosome 7 open reading frame 53                              | ENST00000312849 | 1,111031295 |
| A_21_P0000502 | NR_004407       | RNU11        | RNA, U11 small nuclear                                          |                 | 1,11060369  |
| A_23_P48698   | NM_003814       | ADAM20       | ADAM metallopeptidase domain 20                                 | ENST00000256389 | 1,108723583 |
| A_24_P217365  | NM_015199       | ANKRD28      | ankyrin repeat domain 28                                        | ENST00000383777 | 1,107759609 |
| A_33_P3216277 | XM_001719406    | LOC100131354 | uncharacterized LOC100131354                                    |                 | 1,106947663 |
| A_21_P0007320 | THC2496717      | XLOC_009378  |                                                                 |                 | 1,106651299 |
| A_33_P3417404 | XR_108280       | FAM87B       | family with sequence similarity 87, member B                    |                 | 1,105992835 |
| A_33_P3375077 | NM_015695       | BRPF3        | bromodomain and PHD finger containing, 3                        | ENST00000394572 | 1,105809842 |
| A_21_P0000371 | NR_003037       | SNORD7       | small nucleolar RNA, C/D box 7                                  |                 | 1,105740106 |
| A_33_P3234197 | NM_025188       | TRIM45       | tripartite motif containing 45                                  | ENST00000256649 | 1,105301308 |
| A_24_P15325   | AJ301560        | XKR6         | XK, Kell blood group complex subunit-related family, memb       | ENST00000297303 | 1,104160908 |
| A_21_P0003061 | ENST00000481679 | NAALADL2     | N-acetylated alpha-linked acidic dipeptidase-like 2             | ENST00000481679 | 1,10395556  |
| A_21_P0000392 | NR_003076       | SNORD98      | small nucleolar RNA, C/D box 98                                 | ENST00000483264 | 1,103715652 |
| A_23_P108501  | NM_004438       | EPHA4        | EPH receptor A4                                                 | ENST00000392071 | 1,103201602 |
| A_24_P304071  | NM_001547       | IFIT2        | interferon-induced protein with tetratricopeptide repeats 2     | ENST00000371826 | 1,102634722 |
| A_33_P3365134 | NM_015316       | PPP1R13B     | protein phosphatase 1, regulatory subunit 13B                   | ENST00000423488 | 1,102182291 |
| A_33_P3390758 | NM_153201       | HSPA8        | heat shock 70kDa protein 8                                      | ENST00000453788 | 1,101806408 |
| A_24_P92558   | NM_001039891    | ZNF674       | zinc finger protein 674                                         | ENST00000414387 | 1,101125122 |
| A_24_P350744  | NM_014949       | KIAA0907     | KIAA0907                                                        | ENST00000466713 | 1,100922964 |
| A_21_P0012380 | NR_040005       | LOC401074    | uncharacterized LOC401074                                       |                 | 1,100623046 |

|                |                  |                |                                                                     |                 |             |
|----------------|------------------|----------------|---------------------------------------------------------------------|-----------------|-------------|
| A_23_P341700   | NM_001007101     | ZNF484         | zinc finger protein 484                                             | ENST00000375495 | 1,100405877 |
| A_33_P3212769  | BC020894         | LOC100132686   | uncharacterized LOC100132686                                        |                 | 1,099818918 |
| A_21_P0004617  | ENST00000430078  | XLOC_005900    |                                                                     | ENST00000430078 | 1,099522136 |
| A_21_P0009088  | TCONS_00024776   | XLOC_012051    |                                                                     |                 | 1,097576098 |
| A_21_P0000338  | NR_002984        | SNORA56        | small nucleolar RNA, H/ACA box 56                                   | ENST00000481062 | 1,097481947 |
| A_23_P108932   | NR_002229        | RPL23AP32      | ribosomal protein L23a pseudogene 32                                |                 | 1,096925403 |
| A_23_P78018    | NM_018672        | ABCA5          | ATP-binding cassette, sub-family A (ABC1), member 5                 | ENST00000392676 | 1,095057236 |
| A_33_P3273272  | NM_001172655     | ZNF701         | zinc finger protein 701                                             | ENST00000301093 | 1,094937594 |
| A_23_P108404   | NM_001037131     | AGAP1          | ArfGAP with GTPase domain, ankyrin repeat and PH domain             | ENST00000304032 | 1,094749389 |
| A_21_P0013401  | ENST00000440208  | XLOC_I2_013554 |                                                                     | ENST00000440208 | 1,094435183 |
| A_23_P151294   | NM_000619        | IFNG           | interferon, gamma                                                   | ENST00000229135 | 1,093784418 |
| A_21_P0013766  | TCONS_I2_0003022 | XLOC_I2_015536 |                                                                     |                 | 1,093559153 |
| A_33_P3219601  | NM_007314        | ABL2           | v-abl Abelson murine leukemia viral oncogene homolog 2              | ENST00000504405 | 1,092160952 |
| A_33_P3349252  | AL512723         | DKFZP547L112   | uncharacterized protein DKFZp547L112                                |                 | 1,091155301 |
| A_33_P3379391  | NM_177925        | H2AFJ          | H2A histone family, member J                                        | ENST00000228929 | 1,090774647 |
| A_23_P118392   | NM_016084        | RASD1          | RAS, dexamethasone-induced 1                                        | ENST00000225688 | 1,090612203 |
| A_19_P00318213 | NR_024052        | HCG18          | HLA complex group 18 (non-protein coding)                           | ENST00000422389 | 1,090381828 |
| A_33_P3211260  | AB209486         | DBNL           | drebrin-like                                                        |                 | 1,089626248 |
| A_33_P3328621  | BC036435         | LOC100132147   | uncharacterized LOC100132147                                        | ENST00000453554 | 1,088829018 |
| A_21_P0009488  | TCONS_00026344   | XLOC_012694    |                                                                     |                 | 1,088555767 |
| A_33_P3242603  | NR_027023        | LOC645676      | uncharacterized LOC645676                                           | ENST00000479076 | 1,088348193 |
| A_19_P00323103 | ENST00000485597  | XLOC_001775    |                                                                     | ENST00000485597 | 1,085841127 |
| A_33_P3365710  | AK125522         | ATP6V0D1       | ATPase, H <sup>+</sup> transporting, lysosomal 38kDa, V0 subunit d1 |                 | 1,084449688 |
| A_23_P92860    | NM_021147        | CCNO           | cyclin O                                                            | ENST00000501463 | 1,084073483 |
| A_33_P3377459  | NM_001040284     | PAPD5          | PAP associated domain containing 5                                  | ENST00000436909 | 1,083829339 |
| A_23_P118392   | NM_016084        | RASD1          | RAS, dexamethasone-induced 1                                        | ENST00000225688 | 1,08209262  |
| A_33_P3222307  | AK125520         | LOC100129380   | uncharacterized LOC100129380                                        |                 | 1,081957344 |
| A_23_P42784    | NM_032944        | STK31          | serine/threonine kinase 31                                          | ENST00000354639 | 1,080706384 |
| A_33_P3299319  | NM_001136137     | RPL28          | ribosomal protein L28                                               | ENST00000428193 | 1,080604343 |

|               |                 |                |                                                   |                 |             |
|---------------|-----------------|----------------|---------------------------------------------------|-----------------|-------------|
| A_23_P108501  | NM_004438       | EPHA4          | EPH receptor A4                                   | ENST00000392071 | 1,07984587  |
| A_23_P337270  | ENST00000383770 | NEK10          | NIMA (never in mitosis gene a)- related kinase 10 | ENST00000383770 | 1,079377844 |
| A_21_P0007078 | TCONS_00018817  | XLOC_008614    |                                                   |                 | 1,077904709 |
| A_33_P3421748 | ENST00000381679 | SON            | SON DNA binding protein                           | ENST00000381679 | 1,077410161 |
| A_23_P410717  | NM_144697       | C1orf51        | chromosome 1 open reading frame 51                | ENST00000290363 | 1,077312459 |
| A_23_P46690   | NM_203376       | TMEM81         | transmembrane protein 81                          | ENST00000367167 | 1,077303588 |
| A_23_P120170  | NM_145702       | TIGD1          | tigger transposable element derived 1             | ENST00000408957 | 1,076709595 |
| A_32_P38283   | NM_174910       | TCTE3          | t-complex-associated-testis-expressed 3           | ENST00000366774 | 1,07663317  |
| A_21_P0014046 | XM_003403783    | LOC100653120   | uncharacterized LOC100653120                      |                 | 1,075850799 |
| A_21_P0005731 | TCONS_00014788  | XLOC_006862    |                                                   |                 | 1,074493171 |
| A_21_P0004846 | TCONS_00011706  | XLOC_005185    |                                                   |                 | 1,07427718  |
| A_33_P3348752 | NM_006644       | HSPH1          | heat shock 105kDa/110kDa protein 1                | ENST00000380363 | 1,07314736  |
| A_23_P108501  | NM_004438       | EPHA4          | EPH receptor A4                                   | ENST00000392071 | 1,071636565 |
| A_23_P415411  | NM_003545       | HIST1H4E       | histone cluster 1, H4e                            | ENST00000360441 | 1,07044776  |
| A_32_P315395  | NR_026914       | MGC16275       | uncharacterized protein MGC16275                  |                 | 1,07025821  |
| A_24_P924836  | BC022827        | CRYZL1         | crystallin, zeta (quinone reductase)-like 1       | ENST00000399442 | 1,069469984 |
| A_21_P0013255 | BG168839        | XLOC_I2_013513 |                                                   |                 | 1,068925208 |
| A_33_P3254727 | XM_001723862    | LOC100130921   | uncharacterized LOC100130921                      |                 | 1,06832859  |
| A_21_P0007015 | TCONS_00018595  | XLOC_008935    |                                                   |                 | 1,068260261 |
| A_21_P0000395 | NR_003079       | SNORD111       | small nucleolar RNA, C/D box 111                  |                 | 1,067022272 |
| A_23_P151294  | NM_000619       | IFNG           | interferon, gamma                                 | ENST00000229135 | 1,065819162 |
| A_21_P0000658 | NR_036530       | LOC100289230   | uncharacterized LOC100289230                      |                 | 1,065775399 |
| A_23_P151294  | NM_000619       | IFNG           | interferon, gamma                                 | ENST00000229135 | 1,06483093  |
| A_33_P3388636 | AK097925        | FLJ40606       | uncharacterized LOC643549                         |                 | 1,064447212 |
| A_33_P3390723 | ENST00000377055 | TMEM2          | transmembrane protein 2                           | ENST00000377055 | 1,063477335 |
| A_23_P108501  | NM_004438       | EPHA4          | EPH receptor A4                                   | ENST00000392071 | 1,063275937 |
| A_32_P228268  | NM_207437       | DNAH10         | dynein, axonemal, heavy chain 10                  | ENST00000492261 | 1,062819346 |
| A_21_P0013394 | ENST00000438538 | XLOC_I2_013513 |                                                   | ENST00000438538 | 1,061484125 |
| A_23_P369815  | NM_000639       | FASLG          | Fas ligand (TNF superfamily, member 6)            | ENST00000367721 | 1,061313619 |

|                |                   |                |                                                             |                 |             |
|----------------|-------------------|----------------|-------------------------------------------------------------|-----------------|-------------|
| A_24_P196499   | ENST00000471257   | ARID4B         | AT rich interactive domain 4B (RBP1-like)                   | ENST00000471257 | 1,061121128 |
| A_21_P0000246  | NR_002442         | SNORD18B       | small nucleolar RNA, C/D box 18B                            |                 | 1,060124273 |
| A_21_P0014650  | XR_110899         | LOC100506282   | uncharacterized LOC100506282                                |                 | 1,059997257 |
| A_23_P204208   | NM_002262         | KLRD1          | killer cell lectin-like receptor subfamily D, member 1      | ENST00000539374 | 1,058485816 |
| A_23_P40805    | NM_014079         | KLF15          | Kruppel-like factor 15                                      | ENST00000296233 | 1,058170347 |
| A_23_P120170   | NM_145702         | TIGD1          | tigger transposable element derived 1                       | ENST00000408957 | 1,057483572 |
| A_19_P00810899 | NR_027058         | LINC00338      | long intergenic non-protein coding RNA 338                  | ENST00000434411 | 1,057126388 |
| A_23_P28012    | NM_033196         | ZNF682         | zinc finger protein 682                                     | ENST00000358523 | 1,056269725 |
| A_32_P221799   | NM_003514         | HIST1H2AM      | histone cluster 1, H2am                                     | ENST00000359611 | 1,05486983  |
| A_21_P0005708  | ENST00000523728   | XLOC_006817    |                                                             | ENST00000523728 | 1,054718981 |
| A_23_P113462   | NM_017641         | KIF21A         | kinesin family member 21A                                   | ENST00000395670 | 1,054167216 |
| A_33_P3305770  | ENST00000389311   | NBR1           | neighbor of BRCA1 gene 1                                    | ENST00000389311 | 1,053740789 |
| A_21_P0013298  | NR_024271         | SEPT7P2        | septin 7 pseudogene 2                                       | ENST00000338231 | 1,053593442 |
| A_23_P301138   | NM_001005910      | IP6K2          | inositol hexakisphosphate kinase 2                          | ENST00000416707 | 1,053473453 |
| A_24_P9321     | NM_003533         | HIST1H3I       | histone cluster 1, H3i                                      | ENST00000328488 | 1,051739535 |
| A_24_P500422   | NR_024403         | LOC730101      | uncharacterized LOC730101                                   |                 | 1,051313426 |
| A_21_P0006371  | AK126245          | XLOC_007556    |                                                             |                 | 1,050478514 |
| A_21_P0014606  | ENST00000415255   | LOC100506950   |                                                             | ENST00000415255 | 1,050082892 |
| A_23_P426305   | NM_003734         | AOC3           | amine oxidase, copper containing 3 (vascular adhesion prot  | ENST00000308423 | 1,049880354 |
| A_21_P0010220  | BC029473          | XLOC_013853    |                                                             |                 | 1,049072272 |
| A_21_P0013393  | ENST00000415536   | XLOC_I2_013513 |                                                             | ENST00000415536 | 1,048645663 |
| A_23_P166400   | NM_001007279      | RASL10A        | RAS-like, family 10, member A                               | ENST00000401450 | 1,048401117 |
| A_33_P3233834  | NM_001190981      | IL6ST          | interleukin 6 signal transducer (gp130, oncostatin M recept | ENST00000542298 | 1,047724944 |
| A_33_P3322450  | ENST00000378815   | RAB3IP         | RAB3A interacting protein (rabin3)                          | ENST00000378815 | 1,043850057 |
| A_21_P0013439  | ENST00000412091   | XLOC_I2_013873 |                                                             | ENST00000412091 | 1,043689173 |
| A_21_P0012709  | AK098398          | HMP19          | HMP19 protein                                               |                 | 1,043316789 |
| A_21_P0009720  | ENST00000446262   | XLOC_013056    |                                                             | ENST00000446262 | 1,042811938 |
| A_21_P0013877  | TCONS_I2_0003089: | XLOC_I2_015885 |                                                             |                 | 1,042483538 |
| A_21_P0008352  | ENST00000553944   | XLOC_010859    |                                                             | ENST00000553944 | 1,041387016 |



|               |                 |              |                                                                                     |                 |             |
|---------------|-----------------|--------------|-------------------------------------------------------------------------------------|-----------------|-------------|
| A_21_P0004469 | TCONS_00010555  | XLOC_005082  |                                                                                     |                 | 1,040481353 |
| A_33_P3366336 | NM_001024401    | SBK1         | SH3-binding domain kinase 1                                                         | ENST00000341901 | 1,040054244 |
| A_33_P3367606 | NR_026806       | FLJ13224     | uncharacterized LOC79857                                                            | ENST00000313737 | 1,036872673 |
| A_23_P212089  | NM_031419       | NFKBIZ       | nuclear factor of kappa light polypeptide gene enhancer in I                        | ENST00000326172 | 1,034005552 |
| A_23_P371824  | NM_020127       | TUFT1        | tuftelin 1                                                                          | ENST00000507671 | 1,033941525 |
| A_23_P363174  | NM_003511       | HIST1H2AL    | histone cluster 1, H2al                                                             | ENST00000357320 | 1,033051925 |
| A_24_P475864  | NR_003369       | RRN3P2       | RNA polymerase I transcription factor homolog ( <i>S. cerevisiae</i> ) pseudogene 2 |                 | 1,032364568 |
| A_33_P3255914 | NM_013262       | MYLIP        | myosin regulatory light chain interacting protein                                   | ENST00000349606 | 1,030899936 |
| A_33_P3276455 | NM_006618       | KDM5B        | lysine (K)-specific demethylase 5B                                                  | ENST00000543924 | 1,030460305 |
| A_23_P120170  | NM_145702       | TIGD1        | tigger transposable element derived 1                                               | ENST00000408957 | 1,03035357  |
| A_23_P74737   | NM_001990       | EYA3         | eyes absent homolog 3 ( <i>Drosophila</i> )                                         | ENST00000495923 | 1,029469986 |
| A_23_P117261  | NM_130806       | RXFP2        | relaxin/insulin-like family peptide receptor 2                                      | ENST00000298386 | 1,029120908 |
| A_21_P0002438 | TCONS_00004245  | XLOC_002085  |                                                                                     |                 | 1,028728036 |
| A_21_P0006817 | TCONS_00018091  | XLOC_008358  |                                                                                     |                 | 1,02784897  |
| A_21_P0014758 | XR_132514       | LOC100652921 | uncharacterized LOC100652921                                                        |                 | 1,027283773 |
| A_32_P176550  | NM_152405       | JMY          | junction mediating and regulatory protein, p53 cofactor                             | ENST00000282259 | 1,02725414  |
| A_23_P16817   | NM_004071       | CLK1         | CDC-like kinase 1                                                                   | ENST00000496205 | 1,026676195 |
| A_24_P198629  | NM_001040616    | LINS         | lines homolog ( <i>Drosophila</i> )                                                 | ENST00000314742 | 1,025326306 |
| A_21_P0003963 | ENST00000504494 | XLOC_004279  |                                                                                     | ENST00000504494 | 1,025309023 |
| A_32_P36235   | NM_004907       | IER2         | immediate early response 2                                                          | ENST00000292433 | 1,023316131 |
| A_23_P108404  | NM_001037131    | AGAP1        | ArfGAP with GTPase domain, ankyrin repeat and PH domain                             | ENST00000304032 | 1,023120345 |
| A_24_P942017  | NR_034127       | LOC100132356 | uncharacterized LOC100132356                                                        |                 | 1,022211329 |
| A_21_P0000624 | NM_001243392    | SLC6A13      | solute carrier family 6 (neurotransmitter transporter, GABA                         | ENST00000436453 | 1,021919682 |
| A_21_P0013979 | XM_003119000    | LOC100506073 |                                                                                     |                 | 1,021821187 |
| A_33_P3224505 | AK126083        | LOC100131099 | uncharacterized LOC100131099                                                        |                 | 1,020466918 |
| A_23_P129695  | NM_138440       | VASN         | vasorin                                                                             | ENST00000304735 | 1,020081316 |
| A_21_P0009329 | TCONS_00025688  | XLOC_012503  |                                                                                     |                 | 1,019804388 |
| A_21_P0002437 | TCONS_00005144  | XLOC_002085  |                                                                                     |                 | 1,019676193 |
| A_33_P3351566 | NM_001039481    | ETNK1        | ethanolamine kinase 1                                                               | ENST00000335148 | 1,019485525 |

|               |                  |                |                                                             |                 |             |
|---------------|------------------|----------------|-------------------------------------------------------------|-----------------|-------------|
| A_33_P3345608 | NM_001202438     | C10orf137      | chromosome 10 open reading frame 137                        | ENST00000392732 | 1,018938438 |
| A_21_P0006299 | TCONS_00016434   | XLOC_007800    |                                                             |                 | 1,016079002 |
| A_33_P3316078 | NM_001039938     | INTS6          | integrator complex subunit 6                                | ENST00000442263 | 1,015948408 |
| A_33_P3768196 | NR_027085        | LOC284551      | uncharacterized LOC284551                                   | ENST00000412068 | 1,014963606 |
| A_21_P0008312 | TCONS_00022455   | XLOC_010783    |                                                             |                 | 1,01452149  |
| A_33_P3287338 | NM_001190981     | IL6ST          | interleukin 6 signal transducer (gp130, oncostatin M recept | ENST00000542298 | 1,014349364 |
| A_23_P369815  | NM_000639        | FASLG          | Fas ligand (TNF superfamily, member 6)                      | ENST00000367721 | 1,013879148 |
| A_33_P3703637 | AK095655         | LOC285300      | uncharacterized LOC285300                                   |                 | 1,011536848 |
| A_23_P393099  | NM_003226        | TFF3           | trefoil factor 3 (intestinal)                               | ENST00000518498 | 1,010733637 |
| A_21_P0005449 | TCONS_00013649   | XLOC_006303    |                                                             |                 | 1,010541872 |
| A_24_P567298  | NM_004909        | CSAG2          | CSAG family, member 2                                       | ENST00000356911 | 1,010053251 |
| A_24_P168574  | ENST00000481768  | GNAS           | GNAS complex locus                                          | ENST00000481768 | 1,009842216 |
| A_33_P3315149 | NR_027262        | C15orf34       | chromosome 15 open reading frame 34                         |                 | 1,008748176 |
| A_23_P108404  | NM_001037131     | AGAP1          | ArfGAP with GTPase domain, ankyrin repeat and PH domair     | ENST00000304032 | 1,008317215 |
| A_21_P0001297 | TCONS_00000942   | XLOC_000194    |                                                             |                 | 1,008218894 |
| A_33_P3400699 | NM_206883        | SLC26A5        | solute carrier family 26, member 5 (prestin)                | ENST00000339444 | 1,008172303 |
| A_21_P0014592 | XR_110434        | LOC100507575   | uncharacterized LOC100507575                                |                 | 1,008098067 |
| A_21_P0001652 | TCONS_00001898   | XLOC_001286    |                                                             |                 | 1,007512387 |
| A_21_P0006123 | TCONS_00015915   | XLOC_007277    |                                                             |                 | 1,004552733 |
| A_33_P3324383 | NM_001013690     | FIGNL2         | fidgetin-like 2                                             |                 | 1,003981401 |
| A_21_P0012153 | BC007940         | XLOC_I2_008689 |                                                             |                 | 1,003868472 |
| A_23_P79247   | NM_024989        | PGAP1          | post-GPI attachment to proteins 1                           | ENST00000482051 | 1,003699213 |
| A_21_P0002920 | ENST00000418353  | XLOC_003383    |                                                             | ENST00000418353 | 1,002430508 |
| A_23_P54357   | NM_033195        | LDHAL6B        | lactate dehydrogenase A-like 6B                             | ENST00000307144 | 1,002245043 |
| A_21_P0008164 | TCONS_00022023   | XLOC_010617    |                                                             |                 | 1,001958676 |
| A_23_P148484  | NM_016120        | RLIM           | ring finger protein, LIM domain interacting                 | ENST00000349225 | 1,00188109  |
| A_21_P0005145 | TCONS_00012631   | XLOC_005559    |                                                             |                 | 1,001650108 |
| A_23_P151046  | NM_002259        | KLRC1          | killer cell lectin-like receptor subfamily C, member 1      | ENST00000544822 | 1,001391496 |
| A_21_P0013308 | TCONS_I2_0002659 | XLOC_I2_013846 |                                                             |                 | 1,001316493 |

|                |                 |              |                                                                      |                 |             |
|----------------|-----------------|--------------|----------------------------------------------------------------------|-----------------|-------------|
| A_23_P120170   | NM_145702       | TIGD1        | tigger transposable element derived 1                                | ENST00000408957 | 1,000579085 |
| A_24_P143171   | NM_031442       | TMEM47       | transmembrane protein 47                                             | ENST00000275954 | 1,000094661 |
| A_23_P20122    | NM_024625       | ZC3HAV1      | zinc finger CCCH-type, antiviral 1                                   | ENST00000471652 | 0,99976676  |
| A_21_P0005590  | TCONS_00014242  | XLOC_006319  |                                                                      |                 | 0,99917207  |
| A_23_P36018    | NM_014312       | VSIG2        | V-set and immunoglobulin domain containing 2                         | ENST00000326621 | 0,999101331 |
| A_21_P0002670  | BU194987        | XLOC_002198  |                                                                      |                 | 0,99905464  |
| A_24_P277673   | NM_003547       | HIST1H4G     | histone cluster 1, H4g                                               | ENST00000244537 | 0,998446532 |
| A_33_P3265159  | BC110990        | GAPVD1       | GTPase activating protein and VPS9 domains 1                         | ENST00000394084 | 0,997415152 |
| A_33_P3237891  | ENST00000409922 | CHN2         | chimerin (chimaerin) 2                                               | ENST00000409922 | 0,99638578  |
| A_21_P0003965  | ENST00000511758 | XLOC_004282  |                                                                      | ENST00000511758 | 0,995956186 |
| A_32_P197825   | NM_001032392    | PLGLB1       | plasminogen-like B1                                                  | ENST00000482249 | 0,995648451 |
| A_24_P272225   | NR_027023       | LOC645676    | uncharacterized LOC645676                                            | ENST00000452809 | 0,9950325   |
| A_23_P34877    | NM_022768       | RBM15        | RNA binding motif protein 15                                         | ENST00000487146 | 0,99495506  |
| A_23_P24275    | NR_027709       | IDI2-AS1     | IDI2 antisense RNA 1 (non-protein coding)                            | ENST00000536039 | 0,994516631 |
| A_24_P833256   | XR_132625       | LOC100506898 | mago-nashi homolog, proliferation-associated (Drosophila) pseudogene |                 | 0,994301421 |
| A_33_P3334590  | NM_017762       | MTMR10       | myotubularin related protein 10                                      | ENST00000340566 | 0,993674505 |
| A_33_P3325384  | NR_038921       | LOC100130992 | uncharacterized LOC100130992                                         |                 | 0,99326565  |
| A_21_P0004401  | TCONS_00010352  | XLOC_004841  |                                                                      |                 | 0,99325591  |
| A_33_P3777165  | BC022164        | FLJ31715     | uncharacterized FLJ31715                                             |                 | 0,993014581 |
| A_24_P11061    | NM_153478       | CSAG1        | chondrosarcoma associated gene 1                                     | ENST00000452779 | 0,992532111 |
| A_21_P0000498  | NR_004397       | SNORD1C      | small nucleolar RNA, C/D box 1C                                      | ENST00000448136 | 0,990823435 |
| A_21_P0011910  | NM_012124       | CHORDC1      | cysteine and histidine-rich domain (CHORD) containing 1              | ENST00000525317 | 0,989761809 |
| A_33_P3253501  | NM_001161334    | HIST2H2BF    | histone cluster 2, H2bf                                              | ENST00000369167 | 0,989536116 |
| A_33_P3337272  | NM_001004354    | NRARP        | NOTCH-regulated ankyrin repeat protein                               | ENST00000356628 | 0,989517272 |
| A_23_P398294   | NM_003959       | HIP1R        | huntingtin interacting protein 1 related                             | ENST00000253083 | 0,989228263 |
| A_19_P00320090 | NR_027058       | LINC00338    | long intergenic non-protein coding RNA 338                           | ENST00000434411 | 0,989023544 |
| A_23_P96590    | NM_014710       | GPRASP1      | G protein-coupled receptor associated sorting protein 1              | ENST00000361600 | 0,987992821 |
| A_33_P3346327  | NR_003674       | KGFLP1       | fibroblast growth factor 7 pseudogene                                | ENST00000377614 | 0,987564675 |
| A_23_P10025    | NM_006159       | NELL2        | NEL-like 2 (chicken)                                                 | ENST00000437801 | 0,987283087 |

|                |                 |              |                                                                  |                 |             |
|----------------|-----------------|--------------|------------------------------------------------------------------|-----------------|-------------|
| A_33_P3373046  | NM_001024596    | ZNF772       | zinc finger protein 772                                          | ENST00000291809 | 0,987258619 |
| A_33_P3422479  | NM_001031717    | CRELD1       | cysteine-rich with EGF-like domains 1                            | ENST00000326434 | 0,987251487 |
| A_33_P3289005  | NM_001039569    | AP1S3        | adaptor-related protein complex 1, sigma 3 subunit               | ENST00000446015 | 0,985554577 |
| A_21_P0007960  | AF339799        | XLOC_010477  |                                                                  | ENST00000434547 | 0,982873999 |
| A_23_P117261   | NM_130806       | RXFP2        | relaxin/insulin-like family peptide receptor 2                   | ENST00000298386 | 0,982599511 |
| A_23_P416212   | NM_033194       | HSPB9        | heat shock protein, alpha-crystallin-related, B9                 | ENST00000355067 | 0,982262256 |
| A_23_P108932   | NR_002229       | RPL23AP32    | ribosomal protein L23a pseudogene 32                             |                 | 0,981757003 |
| A_23_P108404   | NM_001037131    | AGAP1        | ArfGAP with GTPase domain, ankyrin repeat and PH domain          | ENST00000304032 | 0,981588605 |
| A_19_P00330549 | NR_034127       | LOC100132356 | uncharacterized LOC100132356                                     |                 | 0,981528187 |
| A_33_P3226995  | NM_006137       | CD7          | CD7 molecule                                                     | ENST00000312648 | 0,981411766 |
| A_23_P122439   | NM_181531       | BTN2A2       | butyrophilin, subfamily 2, member A2                             | ENST00000416795 | 0,981335317 |
| A_21_P0000657  | NR_036530       | LOC100289230 | uncharacterized LOC100289230                                     |                 | 0,980828162 |
| A_33_P3288357  | ENST00000373293 | C9orf117     | chromosome 9 open reading frame 117                              | ENST00000373293 | 0,980524465 |
| A_24_P166407   | NM_003544       | HIST1H4B     | histone cluster 1, H4b                                           | ENST00000377364 | 0,980292744 |
| A_23_P102242   | NM_022826       | Mar-07       | membrane-associated ring finger (C3HC4) 7                        | ENST00000409175 | 0,980001519 |
| A_33_P3218138  | NM_000937       | POLR2A       | polymerase (RNA) II (DNA directed) polypeptide A, 220kDa         | ENST00000322644 | 0,979892024 |
| A_33_P3288074  | BC019017        | LOC730202    | uncharacterized LOC730202                                        |                 | 0,978759231 |
| A_23_P110196   | NM_016323       | HERC5        | hect domain and RLD 5                                            | ENST00000502913 | 0,977915109 |
| A_33_P3373214  | NM_001204180    | ZHX1-C8ORF76 | ZHX1-C8ORF76 readthrough                                         | ENST00000357082 | 0,97753488  |
| A_23_P151294   | NM_000619       | IFNG         | interferon, gamma                                                | ENST00000229135 | 0,975684642 |
| A_33_P3235177  | NM_144993       | TET3         | tet methylcytosine dioxygenase 3                                 | ENST00000409262 | 0,975088301 |
| A_33_P3246997  | ENST00000311571 | LUC7L3       | LUC7-like 3 (S. cerevisiae)                                      | ENST00000311571 | 0,974914332 |
| A_33_P3312735  | NM_024989       | PGAP1        | post-GPI attachment to proteins 1                                | ENST00000422382 | 0,974421613 |
| A_32_P181297   | NR_002330       | ST7-AS1      | ST7 antisense RNA 1 (non-protein coding)                         | ENST00000456775 | 0,973660989 |
| A_21_P0001371  | NM_001128223    | ZNF717       | zinc finger protein 717                                          | ENST00000422325 | 0,973502705 |
| A_23_P110196   | NM_016323       | HERC5        | hect domain and RLD 5                                            | ENST00000502913 | 0,973111877 |
| A_24_P854492   | NR_003491       | MIAT         | myocardial infarction associated transcript (non-protein coding) |                 | 0,973083371 |
| A_33_P3502037  | NM_012124       | CHORDC1      | cysteine and histidine-rich domain (CHORD) containing 1          | ENST00000525317 | 0,972515626 |
| A_23_P102242   | NM_022826       | Mar-07       | membrane-associated ring finger (C3HC4) 7                        | ENST00000409175 | 0,972505832 |

|               |                 |                |                                                               |                 |             |
|---------------|-----------------|----------------|---------------------------------------------------------------|-----------------|-------------|
| A_21_P0007531 | DW422112        | XLOC_009682    |                                                               |                 | 0,97146751  |
| A_33_P3423791 | NM_198182       | GRHL1          | grainyhead-like 1 (Drosophila)                                | ENST00000464418 | 0,971302382 |
| A_24_P307580  | NM_001098523    | HTATIP2        | HIV-1 Tat interactive protein 2, 30kDa                        | ENST00000532505 | 0,970667403 |
| A_33_P3267814 | NM_001136004    | MICAL3         | microtubule associated monooxygenase, calponin and LIM domain | ENST00000461307 | 0,970472525 |
| A_33_P3214209 | NR_027027       | GUSBP1         | glucuronidase, beta pseudogene 1                              | ENST00000508973 | 0,970317574 |
| A_21_P0005636 | ENST00000511929 | XLOC_007026    |                                                               | ENST00000511929 | 0,96999544  |
| A_23_P88119   | NM_006644       | HSPH1          | heat shock 105kDa/110kDa protein 1                            | ENST00000320027 | 0,969903971 |
| A_33_P3289251 | AK095971        | LOC644727      | uncharacterized LOC644727                                     |                 | 0,969885536 |
| A_32_P99019   | NM_152578       | FMR1NB         | fragile X mental retardation 1 neighbor                       | ENST00000489034 | 0,968647161 |
| A_23_P110196  | NM_016323       | HERC5          | hect domain and RLD 5                                         | ENST00000502913 | 0,965595125 |
| A_33_P3235561 | ENST00000264203 | CAPZB          | capping protein (actin filament) muscle Z-line, beta          | ENST00000264203 | 0,965407    |
| A_23_P110196  | NM_016323       | HERC5          | hect domain and RLD 5                                         | ENST00000502913 | 0,965311722 |
| A_21_P0014049 | NR_027420       | LOC389834      | ankyrin repeat domain 57 pseudogene                           |                 | 0,965106328 |
| A_23_P102242  | NM_022826       | Mar-07         | membrane-associated ring finger (C3HC4) 7                     | ENST00000409175 | 0,964722726 |
| A_21_P0012876 | THC2512052      | XLOC_l2_011885 |                                                               |                 | 0,962975346 |
| A_23_P119634  | NM_007000       | UPK1A          | uroplakin 1A                                                  | ENST00000379013 | 0,962953061 |
| A_33_P3319542 | NM_015063       | SLC8A2         | solute carrier family 8 (sodium/calcium exchanger), member    | ENST00000391903 | 0,96269546  |
| A_21_P0006370 | THC2506250      | XLOC_007556    |                                                               |                 | 0,962681443 |
| A_23_P26457   | NM_000517       | HBA2           | hemoglobin, alpha 2                                           | ENST00000482565 | 0,962425599 |
| A_23_P110196  | NM_016323       | HERC5          | hect domain and RLD 5                                         | ENST00000502913 | 0,96161395  |
| A_32_P228167  | NM_152589       | C12orf50       | chromosome 12 open reading frame 50                           | ENST00000298699 | 0,961233882 |
| A_21_P0012834 | ENST00000513310 | THBS4          | thrombospondin 4                                              | ENST00000513310 | 0,960736745 |
| A_23_P415015  | NM_022374       | ATL2           | atlastin GTPase 2                                             | ENST00000546051 | 0,960562825 |
| A_21_P0009368 | XR_109440       | LOC100507520   | uncharacterized LOC100507520                                  |                 | 0,96050448  |
| A_21_P0001747 | BC038430        | XLOC_001097    |                                                               |                 | 0,960337651 |
| A_33_P3336282 | NM_005640       | TAF4B          | TAF4b RNA polymerase II, TATA box binding protein (TBP)-alpha | ENST00000400466 | 0,960114338 |
| A_33_P3374997 | NR_027035       | LOC144486      | uncharacterized LOC144486                                     |                 | 0,96000104  |
| A_23_P110196  | NM_016323       | HERC5          | hect domain and RLD 5                                         | ENST00000502913 | 0,959860517 |
| A_33_P3346936 | ENST00000549378 | MON2           | MON2 homolog (S. cerevisiae)                                  | ENST00000549378 | 0,959475002 |



|                |                 |              |                                                                         |                 |             |
|----------------|-----------------|--------------|-------------------------------------------------------------------------|-----------------|-------------|
| A_23_P102242   | NM_022826       | Mar-07       | membrane-associated ring finger (C3HC4) 7                               | ENST00000409175 | 0,958298798 |
| A_23_P110196   | NM_016323       | HERC5        | hect domain and RLD 5                                                   | ENST00000502913 | 0,957631666 |
| A_23_P110196   | NM_016323       | HERC5        | hect domain and RLD 5                                                   | ENST00000502913 | 0,957468583 |
| A_24_P48403    | NM_005433       | YES1         | v-yes-1 Yamaguchi sarcoma viral oncogene homolog 1                      | ENST00000314574 | 0,956941721 |
| A_21_P0011463  | NM_015092       | SMG1         | smg-1 homolog, phosphatidylinositol 3-kinase-related kinas              | ENST00000447140 | 0,956888776 |
| A_33_P3291614  | XR_110031       | LOC100133039 | uncharacterized LOC100133039                                            |                 | 0,956503288 |
| A_33_P3287690  | ENST00000551483 | CNOT2        | CCR4-NOT transcription complex, subunit 2                               | ENST00000551483 | 0,956474256 |
| A_33_P3228450  | NM_001136007    | FXYD3        | FXYD domain containing ion transport regulator 3                        | ENST00000435734 | 0,956456106 |
| A_33_P3318624  | ENST00000530930 | CTBP2        | C-terminal binding protein 2                                            | ENST00000530930 | 0,956212199 |
| A_23_P428129   | NM_000076       | CDKN1C       | cyclin-dependent kinase inhibitor 1C (p57, Kip2)                        | ENST00000313407 | 0,955742912 |
| A_21_P0007687  | ENST00000546259 | XLOC_010012  |                                                                         | ENST00000546259 | 0,955595432 |
| A_32_P358115   | NR_036490       | LOC284648    | uncharacterized LOC284648                                               |                 | 0,955574236 |
| A_33_P3396050  | BC029817        | LOC440386    | uncharacterized LOC440386                                               |                 | 0,955564831 |
| A_33_P3229239  | NM_001024599    | HIST2H2BF    | histone cluster 2, H2bf                                                 | ENST00000369167 | 0,955222171 |
| A_33_P3278911  | NM_032205       | PHF20L1      | PHD finger protein 20-like 1                                            | ENST00000395382 | 0,955121193 |
| A_23_P64617    | NM_012193       | FZD4         | frizzled family receptor 4                                              | ENST00000531380 | 0,955105504 |
| A_21_P0001416  | TCONS_00001266  | XLOC_000555  |                                                                         |                 | 0,954576773 |
| A_19_P00810043 | XR_108650       | FLJ38717     | FLJ38717 protein                                                        |                 | 0,954259261 |
| A_33_P3352767  | NM_002386       | MC1R         | melanocortin 1 receptor (alpha melanocyte stimulating hormone receptor) |                 | 0,954034031 |
| A_23_P395595   | NM_015308       | FNBP4        | formin binding protein 4                                                | ENST00000263773 | 0,953911101 |
| A_23_P90079    | NM_001080821    | ZNF799       | zinc finger protein 799                                                 | ENST00000430385 | 0,953498351 |
| A_32_P703      | NR_045484       | LOC646626    | uncharacterized LOC646626                                               |                 | 0,953360117 |
| A_24_P941188   | NM_015207       | OTUD3        | OTU domain containing 3                                                 | ENST00000375120 | 0,953161204 |
| A_33_P3303748  | NM_017990       | PDPR         | pyruvate dehydrogenase phosphatase regulatory subunit                   | ENST00000429810 | 0,953149779 |
| A_21_P0010340  | ENST00000442403 | XLOC_014139  |                                                                         | ENST00000442403 | 0,953120766 |
| A_33_P3331080  | NM_001252231    | SEC24A       | SEC24 family, member A (S. cerevisiae)                                  | ENST00000322887 | 0,952797032 |
| A_32_P169179   | NR_002307       | MSX2P1       | msh homeobox 2 pseudogene 1                                             |                 | 0,952650801 |
| A_23_P110196   | NM_016323       | HERC5        | hect domain and RLD 5                                                   | ENST00000502913 | 0,951126021 |
| A_33_P3424384  | ENST00000403537 | THUMPD2      | THUMP domain containing 2                                               | ENST00000403537 | 0,950469833 |

|                |                 |              |                                                             |                 |             |
|----------------|-----------------|--------------|-------------------------------------------------------------|-----------------|-------------|
| A_23_P35414    | NM_005398       | PPP1R3C      | protein phosphatase 1, regulatory subunit 3C                | ENST00000238994 | 0,950183031 |
| A_33_P3257252  | NM_138347       | ZNF551       | zinc finger protein 551                                     | ENST00000359821 | 0,949986245 |
| A_21_P0014250  | XR_109018       | LOC100289455 | uncharacterized LOC100289455                                |                 | 0,94964863  |
| A_23_P53530    | NM_001033050    | MTERFD3      | MTERF domain containing 3                                   | ENST00000552029 | 0,949617438 |
| A_32_P178945   | NM_018566       | YOD1         | YOD1 OTU deubiquinating enzyme 1 homolog (S. cerevisiae)    | ENST00000367084 | 0,949396726 |
| A_23_P342053   | NM_032626       | RBBP6        | retinoblastoma binding protein 6                            | ENST00000452655 | 0,94775489  |
| A_33_P3510335  | NM_213655       | WNK1         | WNK lysine deficient protein kinase 1                       | ENST00000530271 | 0,94761097  |
| A_21_P0000254  | NR_002560       | SNORD31      | small nucleolar RNA, C/D box 31                             |                 | 0,946458168 |
| A_33_P3695899  | XR_108600       | FLJ31104     | uncharacterized LOC441072                                   | ENST00000500093 | 0,945899378 |
| A_23_P153524   | NM_018111       | C19orf73     | chromosome 19 open reading frame 73                         | ENST00000408991 | 0,945513562 |
| A_23_P254025   | NM_003408       | ZFP37        | zinc finger protein 37 homolog (mouse)                      | ENST00000555206 | 0,945413353 |
| A_23_P102242   | NM_022826       | Mar-07       | membrane-associated ring finger (C3HC4) 7                   | ENST00000409175 | 0,944866796 |
| A_23_P102242   | NM_022826       | Mar-07       | membrane-associated ring finger (C3HC4) 7                   | ENST00000409175 | 0,944311897 |
| A_23_P110699   | NM_052860       | ZNF300       | zinc finger protein 300                                     | ENST00000394226 | 0,943722131 |
| A_23_P208240   | ENST00000355147 | ZNF160       | zinc finger protein 160                                     | ENST00000355147 | 0,943333328 |
| A_23_P102242   | NM_022826       | Mar-07       | membrane-associated ring finger (C3HC4) 7                   | ENST00000409175 | 0,942967398 |
| A_23_P110196   | NM_016323       | HERC5        | hect domain and RLD 5                                       | ENST00000502913 | 0,941532358 |
| A_19_P00804859 | NR_029635       | MIR221       |                                                             |                 | 0,941468486 |
| A_24_P555473   | NM_178450       | Mar-03       | membrane-associated ring finger (C3HC4) 3                   | ENST00000308660 | 0,941280697 |
| A_33_P3275381  | NM_001039580    | MAP9         | microtubule-associated protein 9                            | ENST00000393836 | 0,940958358 |
| A_33_P3233843  | NM_001190981    | IL6ST        | interleukin 6 signal transducer (gp130, oncostatin M recept | ENST00000542298 | 0,939455146 |
| A_33_P3251821  | NR_003545       | C5orf44      | chromosome 5 open reading frame 44                          | ENST00000510585 | 0,938314221 |
| A_33_P3671291  | AA378382        | SNORA12      | small nucleolar RNA, H/ACA box 12                           |                 | 0,937719642 |
| A_21_P0008041  | TCONS_00021740  | XLOC_010330  |                                                             |                 | 0,937002816 |
| A_21_P0003050  | TCONS_00006285  | XLOC_002890  |                                                             |                 | 0,936858303 |
| A_23_P102242   | NM_022826       | Mar-07       | membrane-associated ring finger (C3HC4) 7                   | ENST00000409175 | 0,936238906 |
| A_23_P111724   | NM_138290       | RUNDC3B      | RUN domain containing 3B                                    | ENST00000493037 | 0,936232172 |
| A_21_P0000730  | NR_038235       | LOC100507651 | uncharacterized LOC100507651                                |                 | 0,936110172 |
| A_33_P3269453  | ENST00000342579 | BPTF         | bromodomain PHD finger transcription factor                 | ENST00000342579 | 0,936062044 |

|                |                 |              |                                                            |                 |             |
|----------------|-----------------|--------------|------------------------------------------------------------|-----------------|-------------|
| A_33_P3359518  | NM_001085487    | MYSM1        | Myb-like, SWIRM and MPN domains 1                          | ENST00000401044 | 0,935842358 |
| A_33_P3290800  | NM_182540       | DDX26B       | DEAD/H (Asp-Glu-Ala-Asp/His) box polypeptide 26B           | ENST00000494957 | 0,935487826 |
| A_21_P0000288  | NR_002748       | SNORD45B     | small nucleolar RNA, C/D box 45B                           | ENST00000461653 | 0,934752235 |
| A_23_P102242   | NM_022826       | Mar-07       | membrane-associated ring finger (C3HC4) 7                  | ENST00000409175 | 0,934191651 |
| A_32_P226009   | NM_023073       | C5orf42      | chromosome 5 open reading frame 42                         | ENST00000505431 | 0,934141669 |
| A_33_P3245484  | AK124361        | LOC100131000 | uncharacterized LOC100131000                               |                 | 0,933776185 |
| A_23_P120170   | NM_145702       | TIGD1        | tigger transposable element derived 1                      | ENST00000408957 | 0,933290638 |
| A_21_P0002514  | BI765130        | XLOC_002360  |                                                            |                 | 0,933154467 |
| A_23_P211064   | NM_013329       | GCFC1        | GC-rich sequence DNA-binding factor 1                      | ENST00000472588 | 0,931887235 |
| A_33_P3710442  | AK021772        | FLJ11710     | uncharacterized protein FLJ11710                           |                 | 0,931863266 |
| A_33_P3264331  | NM_012183       | FOXD3        | forkhead box D3                                            | ENST00000371116 | 0,931417989 |
| A_33_P3360912  | ENST00000320610 | ZNF236       | zinc finger protein 236                                    | ENST00000320610 | 0,931393158 |
| A_21_P0002168  | THC2561405      | XLOC_001342  |                                                            |                 | 0,931209181 |
| A_23_P27649    | NM_001080411    | ZNF433       | zinc finger protein 433                                    | ENST00000344980 | 0,93092383  |
| A_23_P369815   | NM_000639       | FASLG        | Fas ligand (TNF superfamily, member 6)                     | ENST00000367721 | 0,93047348  |
| A_33_P3368358  | NM_182966       | NEDD9        | neural precursor cell expressed, developmentally down-reg  | ENST00000379433 | 0,930403636 |
| A_23_P211252   | NM_001001438    | LSS          | lanosterol synthase (2,3-oxidosqualene-lanosterol cyclase) | ENST00000356396 | 0,93011586  |
| A_23_P408094   | NM_002357       | MXD1         | MAX dimerization protein 1                                 | ENST00000410000 | 0,929831902 |
| A_21_P0006532  | TCONS_00017313  | XLOC_008149  |                                                            |                 | 0,929154912 |
| A_33_P3507384  | AK056398        | LOC152274    | uncharacterized LOC152274                                  |                 | 0,928493517 |
| A_19_P00316533 | AK093009        | XLOC_013732  |                                                            |                 | 0,928066633 |
| A_21_P0008695  | TCONS_00023549  | XLOC_011383  |                                                            |                 | 0,927840646 |
| A_19_P00809417 | XR_109254       | LOC100287628 | uncharacterized LOC100287628                               |                 | 0,927559282 |
| A_21_P0000469  | NR_003694       | SNORD11B     | small nucleolar RNA, C/D box 11B                           |                 | 0,92689385  |
| A_21_P0000197  | NM_021064       | HIST1H2AG    | histone cluster 1, H2ag                                    | ENST00000359193 | 0,926444224 |
| A_33_P3245449  | NR_027420       | LOC389834    | ankyrin repeat domain 57 pseudogene                        |                 | 0,926256793 |
| A_32_P170547   | NM_001007551    | CT45A5       | cancer/testis antigen family 45, member A5                 | ENST00000491480 | 0,926254115 |
| A_23_P63870    | NM_144660       | SAMD8        | sterile alpha motif domain containing 8                    | ENST00000372690 | 0,925937176 |
| A_23_P358564   | NM_153216       | POU5F2       | POU domain class 5, transcription factor 2                 | ENST00000511874 | 0,92516711  |

|               |                 |              |                                                         |                 |             |
|---------------|-----------------|--------------|---------------------------------------------------------|-----------------|-------------|
| A_23_P216476  | NM_014872       | ZBTB5        | zinc finger and BTB domain containing 5                 | ENST00000307750 | 0,924923623 |
| A_23_P108932  | NR_002229       | RPL23AP32    | ribosomal protein L23a pseudogene 32                    |                 | 0,924717094 |
| A_23_P74981   | NM_033213       | ZNF670       | zinc finger protein 670                                 | ENST00000366503 | 0,924185911 |
| A_24_P290354  | NM_006007       | ZFAND5       | zinc finger, AN1-type domain 5                          | ENST00000471197 | 0,924142395 |
| A_23_P423427  | NM_177454       | FAM171B      | family with sequence similarity 171, member B           | ENST00000304698 | 0,923986849 |
| A_33_P3302632 | NM_003523       | HIST1H2BE    | histone cluster 1, H2be                                 |                 | 0,923393199 |
| A_21_P0014137 | XR_108555       | LOC100506048 | uncharacterized LOC100506048                            |                 | 0,923274469 |
| A_33_P3225096 | NM_017762       | MTMR10       | myotubularin related protein 10                         | ENST00000435680 | 0,923094428 |
| A_23_P102242  | NM_022826       | Mar-07       | membrane-associated ring finger (C3HC4) 7               | ENST00000409175 | 0,922469838 |
| A_33_P3295625 | ENST00000474263 | MED27        | mediator complex subunit 27                             | ENST00000474263 | 0,922368184 |
| A_33_P3284858 | AK093299        | LOC729867    | uncharacterized LOC729867                               |                 | 0,922305911 |
| A_23_P53329   | NR_026806       | FLJ13224     | uncharacterized LOC79857                                | ENST00000313737 | 0,921170909 |
| A_21_P0003733 | ENST00000472346 | XLOC_003912  |                                                         | ENST00000472346 | 0,920387573 |
| A_24_P583040  | ENST00000397861 | C17orf67     | chromosome 17 open reading frame 67                     | ENST00000397861 | 0,919244833 |
| A_21_P0000289 | NR_002749       | SNORD45A     | small nucleolar RNA, C/D box 45A                        | ENST00000497648 | 0,919133275 |
| A_24_P376129  | ENST00000374057 | DFNB31       | deafness, autosomal recessive 31                        | ENST00000374057 | 0,919004275 |
| A_33_P3336287 | NM_001142627    | SEC61A2      | Sec61 alpha 2 subunit ( <i>S. cerevisiae</i> )          | ENST00000379017 | 0,918842532 |
| A_23_P359376  | NR_001317       | HCG4B        | HLA complex group 4B (non-protein coding)               |                 | 0,918327005 |
| A_33_P3382031 | NM_001098844    | TMEM236      | transmembrane protein 236                               | ENST00000480516 | 0,916518624 |
| A_33_P3234530 | NM_001039664    | TNFRSF25     | tumor necrosis factor receptor superfamily, member 25   | ENST00000453341 | 0,916042571 |
| A_23_P108404  | NM_001037131    | AGAP1        | ArfGAP with GTPase domain, ankyrin repeat and PH domain | ENST00000304032 | 0,915947831 |
| A_23_P65208   | NM_001039650    | ZMYM5        | zinc finger, MYM-type 5                                 | ENST00000467542 | 0,915897105 |
| A_33_P3397323 | NM_152355       | ZNF441       | zinc finger protein 441                                 | ENST00000357901 | 0,915521287 |
| A_33_P3404671 | NR_024567       | LOC100130557 | uncharacterized LOC100130557                            |                 | 0,913775332 |
| A_33_P3549874 | BC031230        | LOC255177    | uncharacterized LOC255177                               |                 | 0,912320606 |
| A_23_P120170  | NM_145702       | TIGD1        | tigger transposable element derived 1                   | ENST00000408957 | 0,912082277 |
| A_23_P170608  | NM_022117       | TSPYL2       | TSPY-like 2                                             | ENST00000553557 | 0,911300997 |
| A_21_P0005707 | ENST00000520862 | XLOC_006817  |                                                         | ENST00000520862 | 0,911247174 |
| A_23_P28334   | NM_003853       | IL18RAP      | interleukin 18 receptor accessory protein               | ENST00000264260 | 0,9109616   |

|                |                 |              |                                                              |                 |             |
|----------------|-----------------|--------------|--------------------------------------------------------------|-----------------|-------------|
| A_21_P0008854  | TCONS_00024155  | XLOC_011523  |                                                              |                 | 0,91069142  |
| A_21_P0011857  | XR_109900       | LOC100131316 | uncharacterized LOC100131316                                 |                 | 0,910434447 |
| A_33_P3269203  | NM_001207014    | SERPINH1     | serpin peptidase inhibitor, clade H (heat shock protein 47), | ENST00000524558 | 0,910052515 |
| A_33_P3399064  | NR_003285       | RN5-8S1      | RNA, 5.8S ribosomal 1                                        |                 | 0,910011643 |
| A_21_P0000391  | NR_003075       | SNORD93      | small nucleolar RNA, C/D box 93                              |                 | 0,909924978 |
| A_33_P3405946  | NM_184234       | RBM39        | RNA binding motif protein 39                                 | ENST00000465158 | 0,909682548 |
| A_23_P64980    | NM_016615       | SLC6A13      | solute carrier family 6 (neurotransmitter transporter, GABA  | ENST00000343164 | 0,909633217 |
| A_19_P00805833 | XR_109254       | LOC100287628 | uncharacterized LOC100287628                                 |                 | 0,909572518 |
| A_23_P385126   | NM_139160       | DEPDC7       | DEP domain containing 7                                      | ENST00000311388 | 0,909409785 |
| A_21_P0003789  | TCONS_00008635  | XLOC_004139  |                                                              |                 | 0,909392315 |
| A_33_P3376379  | NM_001139459    | CNST         | consortin, connexin sorting protein                          | ENST00000366511 | 0,909087009 |
| A_32_P8529     | NR_027058       | LINC00338    | long intergenic non-protein coding RNA 338                   | ENST00000434411 | 0,908879843 |
| A_21_P0006506  | THC2647795      | XLOC_008020  |                                                              |                 | 0,908756444 |
| A_33_P3287879  | NM_003536       | HIST1H3H     | histone cluster 1, H3h                                       | ENST00000369163 | 0,908715445 |
| A_33_P3292694  | XR_110489       | LOC643355    | uncharacterized LOC643355                                    |                 | 0,908709468 |
| A_21_P0000208  | NR_000008       | SNORD22      | small nucleolar RNA, C/D box 22                              |                 | 0,908666765 |
| A_23_P108404   | NM_001037131    | AGAP1        | ArfGAP with GTPase domain, ankyrin repeat and PH domair      | ENST00000304032 | 0,908486393 |
| A_23_P255618   | NM_080723       | NRSN1        | neurensin 1                                                  | ENST00000378491 | 0,908392124 |
| A_23_P43273    | NM_000127       | EXT1         | exostosin 1                                                  | ENST00000437196 | 0,908279004 |
| A_23_P214139   | NM_002912       | REV3L        | REV3-like, catalytic subunit of DNA polymerase zeta (yeast)  | ENST00000435970 | 0,90799268  |
| A_21_P0004640  | ENST00000415195 | XLOC_005239  |                                                              | ENST00000415195 | 0,906514784 |
| A_23_P164737   | NM_004831       | MED26        | mediator complex subunit 26                                  | ENST00000263390 | 0,906496797 |
| A_32_P2392     | NM_181077       | GOLGA8A      | golgin A8 family, member A                                   | ENST00000509311 | 0,906493302 |
| A_32_P6172     | NR_027387       | LOC100128822 | uncharacterized LOC100128822                                 |                 | 0,905762649 |
| A_32_P48244    | ENST00000358296 | ZNF100       | zinc finger protein 100                                      | ENST00000358296 | 0,905355913 |
| A_21_P0000068  | NM_001167676    | LOC100128071 | uncharacterized LOC100128071                                 |                 | 0,905093175 |
| A_33_P3239123  | ENST00000372550 | PPIH         | peptidylprolyl isomerase H (cyclophilin H)                   | ENST00000372550 | 0,904296343 |
| A_33_P3271684  | NM_001098844    | TMEM236      | transmembrane protein 236                                    | ENST00000480516 | 0,903996475 |
| A_21_P0014934  | NR_045375       | LOC100506124 | uncharacterized LOC100506124                                 | ENST00000536175 | 0,903751819 |



|                |                   |                |                                                                 |                 |  |             |
|----------------|-------------------|----------------|-----------------------------------------------------------------|-----------------|--|-------------|
| A_21_P0011097  | TCONS_I2_0000629: | XLOC_I2_003400 |                                                                 |                 |  | 0,903550387 |
| A_33_P3626709  | AK126613          | LOC100129280   | uncharacterized LOC100129280                                    |                 |  | 0,903461499 |
| A_23_P109254   | NM_184234         | RBM39          | RNA binding motif protein 39                                    | ENST00000465158 |  | 0,9028024   |
| A_33_P3326672  | NM_001001662      | ZNF782         | zinc finger protein 782                                         | ENST00000481138 |  | 0,901811214 |
| A_33_P3319113  | NM_017990         | PDPR           | pyruvate dehydrogenase phosphatase regulatory subunit           | ENST00000398122 |  | 0,901745501 |
| A_33_P3230837  | NR_003006         | SCARNA6        | small Cajal body-specific RNA 6                                 |                 |  | 0,90167626  |
| A_33_P3422213  | NM_199347         | NEK10          | NIMA (never in mitosis gene a)- related kinase 10               | ENST00000341435 |  | 0,90153696  |
| A_33_P3407434  | XM_003403686      | LOC100653224   | uncharacterized LOC100653224                                    | ENST00000412403 |  | 0,901534531 |
| A_21_P0013664  | ENST00000423171   | XLOC_I2_015239 |                                                                 | ENST00000423171 |  | 0,90075302  |
| A_23_P93269    | NM_003447         | ZNF165         | zinc finger protein 165                                         | ENST00000377325 |  | 0,900673952 |
| A_21_P0011935  | ENST00000431244   | XLOC_I2_008140 |                                                                 | ENST00000431244 |  | 0,900660836 |
| A_23_P328740   | NR_026875         | NEURL3         | neuralized homolog 3 (Drosophila) pseudogene                    | ENST00000310865 |  | 0,90038527  |
| A_23_P109254   | NM_184234         | RBM39          | RNA binding motif protein 39                                    | ENST00000465158 |  | 0,900095384 |
| A_21_P0009820  | ENST00000422519   | XLOC_013737    |                                                                 | ENST00000422519 |  | 0,900084186 |
| A_21_P0012526  | ENST00000415451   | XLOC_I2_010061 |                                                                 | ENST00000415451 |  | 0,899432286 |
| A_21_P0000249  | NR_002447         | SNORD24        | small nucleolar RNA, C/D box 24                                 | ENST00000489392 |  | 0,899229951 |
| A_33_P3358943  | NM_000839         | GRM2           | glutamate receptor, metabotropic 2                              | ENST00000464585 |  | 0,899137085 |
| A_19_P00804049 | NR_038889         | LOC401320      | uncharacterized LOC401320                                       | ENST00000426529 |  | 0,898762006 |
| A_23_P344655   | AK094167          | FLJ36848       | uncharacterized LOC647115                                       |                 |  | 0,898708304 |
| A_23_P215534   | NM_053043         | RBM33          | RNA binding motif protein 33                                    | ENST00000307403 |  | 0,898569585 |
| A_33_P3424462  | NM_001139459      | CNST           | consortin, connexin sorting protein                             | ENST00000483271 |  | 0,898565516 |
| A_23_P109254   | NM_184234         | RBM39          | RNA binding motif protein 39                                    | ENST00000465158 |  | 0,898558554 |
| A_21_P0007695  | TCONS_00020749    | XLOC_010037    |                                                                 |                 |  | 0,897342648 |
| A_33_P3267395  | NM_152512         | ENTHD1         | ENTH domain containing 1                                        | ENST00000325157 |  | 0,89729857  |
| A_33_P3222769  | NM_001013638      | PRR25          | proline rich 25                                                 | ENST00000301698 |  | 0,897144222 |
| A_33_P3240063  | NR_024182         | C14orf48       | chromosome 14 open reading frame 48                             |                 |  | 0,896578138 |
| A_23_P126037   | NM_012421         | RLF            | rearranged L-myc fusion                                         | ENST00000535839 |  | 0,896526291 |
| A_33_P3212269  | ENST00000534743   | MAP2K3         | mitogen-activated protein kinase kinase 3                       | ENST00000534743 |  | 0,896362137 |
| A_21_P0000065  | NM_001166696      | SLC1A3         | solute carrier family 1 (glial high affinity glutamate transpor | ENST00000512374 |  | 0,896158447 |

|                |                  |                |                                                               |                 |             |
|----------------|------------------|----------------|---------------------------------------------------------------|-----------------|-------------|
| A_21_P0000486  | NR_004054        | SNORD103A      | small nucleolar RNA, C/D box 103A                             |                 | 0,896049804 |
| A_23_P160004   | NM_182660        | UTY            | ubiquitously transcribed tetratricopeptide repeat gene, Y-lir | ENST00000545955 | 0,895648514 |
| A_33_P3414107  | XR_108595        | LOC729040      | uncharacterized LOC729040                                     | ENST00000440769 | 0,895611654 |
| A_23_P372860   | NM_003512        | HIST1H2AC      | histone cluster 1, H2ac                                       | ENST00000377791 | 0,895380185 |
| A_23_P109254   | NM_184234        | RBM39          | RNA binding motif protein 39                                  | ENST00000465158 | 0,895262852 |
| A_23_P48495    | NM_004918        | TCL1B          | T-cell leukemia/lymphoma 1B                                   | ENST00000461160 | 0,894607052 |
| A_33_P3366859  | NM_001187        | BAGE           | B melanoma antigen                                            | ENST00000470054 | 0,894245228 |
| A_33_P3298057  | NM_001023587     | ABCC5          | ATP-binding cassette, sub-family C (CFTR/MRP), member 5       | ENST00000438979 | 0,894202392 |
| A_23_P16022    | NM_005773        | ZNF256         | zinc finger protein 256                                       | ENST00000282308 | 0,894005585 |
| A_21_P0010476  | THC2660954       | XLOC_014336    |                                                               |                 | 0,893900529 |
| A_33_P3365815  | AK057458         | LOC729866      | hCG1994895                                                    |                 | 0,893433802 |
| A_23_P323898   | NR_028077        | ZSCAN12        | zinc finger and SCAN domain containing 12                     | ENST00000396827 | 0,892841934 |
| A_33_P3279515  | AK096898         | LOC729451      | uncharacterized LOC729451                                     |                 | 0,892291127 |
| A_21_P0013280  | TCONS_I2_0002638 | XLOC_I2_013728 |                                                               |                 | 0,892161117 |
| A_33_P3405888  | AF130105         | LOC100133130   | PRO1102                                                       |                 | 0,89193484  |
| A_23_P24004    | NM_001547        | IFIT2          | interferon-induced protein with tetratricopeptide repeats 2   | ENST00000371826 | 0,891892598 |
| A_33_P3321602  | ENST00000373838  | PHACTR4        | phosphatase and actin regulator 4                             | ENST00000373838 | 0,891826923 |
| A_21_P0000216  | NR_000016        | SNORD36C       | small nucleolar RNA, C/D box 36C                              | ENST00000492798 | 0,891773765 |
| A_21_P0000256  | NR_002562        | SNORD28        | small nucleolar RNA, C/D box 28                               |                 | 0,891707791 |
| A_23_P109254   | NM_184234        | RBM39          | RNA binding motif protein 39                                  | ENST00000465158 | 0,891695287 |
| A_21_P0006193  | TCONS_00016098   | XLOC_007489    |                                                               |                 | 0,891375682 |
| A_21_P0008072  | TCONS_00021811   | XLOC_010411    |                                                               |                 | 0,891129592 |
| A_23_P109254   | NM_184234        | RBM39          | RNA binding motif protein 39                                  | ENST00000465158 | 0,89034499  |
| A_33_P3356371  | AK127766         | LOC100133089   | uncharacterized LOC100133089                                  |                 | 0,890198394 |
| A_21_P0011869  | TCONS_I2_0001421 | XLOC_I2_007731 |                                                               |                 | 0,88879827  |
| A_19_P00319030 | NR_038948        | LOC100506136   | uncharacterized LOC100506136                                  |                 | 0,888649794 |
| A_21_P0000297  | NR_002914        | SNORD62A       | small nucleolar RNA, C/D box 62A                              | ENST00000426867 | 0,887987303 |
| A_24_P413437   | NM_007363        | NONO           | non-POU domain containing, octamer-binding                    | ENST00000373856 | 0,887853976 |
| A_23_P50646    | NM_001193621     | LOC390940      | uncharacterized protein ENSP00000244321                       |                 | 0,887811255 |

|               |                  |                |                                                               |                 |             |
|---------------|------------------|----------------|---------------------------------------------------------------|-----------------|-------------|
| A_21_P0000037 | NM_001163391     | ZSCAN12        | zinc finger and SCAN domain containing 12                     |                 | 0,887737176 |
| A_33_P3228642 | ENST00000322834  | ZNF584         | zinc finger protein 584                                       | ENST00000322834 | 0,887653279 |
| A_33_P3363720 | NR_033691        | C1orf213       | chromosome 1 open reading frame 213                           | ENST00000335648 | 0,887348805 |
| A_21_P0000484 | NR_003942        | SNORD76        | small nucleolar RNA, C/D box 76                               |                 | 0,887301001 |
| A_21_P0005567 | BM686786         | XLOC_006144    |                                                               |                 | 0,887270765 |
| A_33_P3247848 | NM_001144989     | ZNF814         | zinc finger protein 814                                       | ENST00000435989 | 0,886975795 |
| A_24_P8318    | NM_014423        | AFF4           | AF4/FMR2 family, member 4                                     | ENST00000491831 | 0,886490222 |
| A_23_P427217  | NM_032776        | JMJD1C         | jumonji domain containing 1C                                  | ENST00000542921 | 0,886047541 |
| A_23_P342668  | NM_005088        | AKAP17A        | A kinase (PRKA) anchor protein 17A                            | ENST00000474361 | 0,885595053 |
| A_23_P101683  | NM_001828        | CLC            | Charcot-Leyden crystal protein                                | ENST00000221804 | 0,884995124 |
| A_23_P109254  | NM_184234        | RBM39          | RNA binding motif protein 39                                  | ENST00000465158 | 0,884987341 |
| A_21_P0000497 | NR_004396        | SNORD1B        | small nucleolar RNA, C/D box 1B                               |                 | 0,884619767 |
| A_24_P22981   | NM_021047        | ZNF253         | zinc finger protein 253                                       | ENST00000355650 | 0,884403493 |
| A_33_P3416301 | NM_198256        | E2F6           | E2F transcription factor 6                                    | ENST00000362009 | 0,884078994 |
| A_23_P114084  | NM_000444        | PHEX           | phosphate regulating endopeptidase homolog, X-linked          | ENST00000537599 | 0,883833186 |
| A_23_P108221  | NM_032037        | TSSK6          | testis-specific serine kinase 6                               | ENST00000360913 | 0,883236968 |
| A_23_P205177  | NM_000504        | F10            | coagulation factor X                                          | ENST00000375559 | 0,88304856  |
| A_23_P11664   | NM_004768        | SRSF11         | serine/arginine-rich splicing factor 11                       | ENST00000489188 | 0,882874819 |
| A_23_P71727   | NM_001827        | CKS2           | CDC28 protein kinase regulatory subunit 2                     | ENST00000314355 | 0,882807101 |
| A_23_P39263   | NM_173480        | ZNF57          | zinc finger protein 57                                        | ENST00000395204 | 0,882430718 |
| A_23_P120170  | NM_145702        | TIGD1          | tigger transposable element derived 1                         | ENST00000408957 | 0,882305917 |
| A_33_P3313855 | AY358233         | LOC100127951   | ISPF6484                                                      |                 | 0,881925357 |
| A_33_P3422010 | NM_178504        | DNAH12         | dynein, axonemal, heavy chain 12                              | ENST00000351747 | 0,881833609 |
| A_33_P3267532 | NM_170736        | KCNJ15         | potassium inwardly-rectifying channel, subfamily J, member 15 | ENST00000398925 | 0,881624416 |
| A_33_P3214119 | ENST00000528751  | NPEPPS         | aminopeptidase puromycin sensitive                            | ENST00000528751 | 0,88125088  |
| A_33_P3278774 | ENST00000483826  | ZNF44          | zinc finger protein 44                                        | ENST00000483826 | 0,880315631 |
| A_23_P78152   | NM_024039        | MIS12          | MIS12, MIND kinetochore complex component, homolog (S)        | ENST00000381165 | 0,880293887 |
| A_21_P0012585 | TCONS_I2_0002053 | XLOC_I2_010679 |                                                               |                 | 0,880269122 |
| A_23_P379692  | NM_174943        | C14orf178      | chromosome 14 open reading frame 178                          | ENST00000556047 | 0,880208019 |

|                |                |                |                                                               |                 |             |
|----------------|----------------|----------------|---------------------------------------------------------------|-----------------|-------------|
| A_21_P0000380  | NR_003057      | SNORD69        | small nucleolar RNA, C/D box 69                               |                 | 0,879737619 |
| A_32_P7823     | NM_144578      | MAPK1IP1L      | mitogen-activated protein kinase 1 interacting protein 1-like | ENST00000395468 | 0,878887779 |
| A_33_P3397418  | NM_020119      | ZC3HAV1        | zinc finger CCCH-type, antiviral 1                            | ENST00000242351 | 0,878665576 |
| A_33_P3543133  | NR_038970      | LOC283624      | uncharacterized LOC283624                                     | ENST00000555379 | 0,87800215  |
| A_21_P0006331  | TCONS_00016498 | XLOC_007879    |                                                               |                 | 0,877371496 |
| A_33_P3243307  | AK128353       | LOC100128281   | uncharacterized LOC100128281                                  |                 | 0,877126347 |
| A_23_P13359    | NM_006362      | NXF1           | nuclear RNA export factor 1                                   | ENST00000533048 | 0,876722172 |
| A_21_P0005800  | TCONS_00014933 | XLOC_007004    |                                                               |                 | 0,876678923 |
| A_24_P929441   | AY358167       | ARID5A         | AT rich interactive domain 5A (MRF1-like)                     | ENST00000454558 | 0,876667562 |
| A_21_P0012166  | BC039367       | XLOC_I2_008910 |                                                               |                 | 0,876268262 |
| A_32_P224234   | AK123450       | LOC645195      | uncharacterized LOC645195                                     |                 | 0,876136232 |
| A_23_P99996    | NM_019066      | MAGEL2         | MAGE-like 2                                                   | ENST00000532292 | 0,876034737 |
| A_23_P109254   | NM_184234      | RBM39          | RNA binding motif protein 39                                  | ENST00000465158 | 0,87530266  |
| A_32_P197621   | NR_002830      | GEMIN8P4       | gem (nuclear organelle) associated protein 8 pseudogene 4     |                 | 0,875087676 |
| A_21_P0000386  | NR_003070      | SNORD89        | small nucleolar RNA, C/D box 89                               |                 | 0,875050473 |
| A_33_P3284448  | NR_038857      | LOC441009      | uncharacterized LOC441009                                     |                 | 0,875041229 |
| A_21_P0002250  | THC2498339     | XLOC_001550    |                                                               |                 | 0,874967891 |
| A_33_P3396120  | NM_032530      | ZNF594         | zinc finger protein 594                                       | ENST00000389222 | 0,874799163 |
| A_23_P82108    | NM_020861      | ZBTB2          | zinc finger and BTB domain containing 2                       | ENST00000325144 | 0,874227126 |
| A_33_P3326812  | AK127768       | LOC100130152   | uncharacterized LOC100130152                                  |                 | 0,874140047 |
| A_21_P0004866  | NR_026775      | LINC00240      | long intergenic non-protein coding RNA 240                    | ENST00000503488 | 0,874082946 |
| A_21_P0009386  | TCONS_00025888 | XLOC_012162    |                                                               |                 | 0,873554374 |
| A_33_P3347928  | NM_020307      | CCNL1          | cyclin L1                                                     | ENST00000295925 | 0,873424147 |
| A_23_P109254   | NM_184234      | RBM39          | RNA binding motif protein 39                                  | ENST00000465158 | 0,873302655 |
| A_33_P3323347  | NM_152475      | ZNF417         | zinc finger protein 417                                       | ENST00000312026 | 0,873284629 |
| A_19_P00321166 | NR_034127      | LOC100132356   | uncharacterized LOC100132356                                  |                 | 0,87264461  |
| A_23_P432034   | NM_173510      | CCDC117        | coiled-coil domain containing 117                             | ENST00000249064 | 0,872274264 |
| A_33_P3424057  | NM_006210      | PEG3           | paternally expressed 3                                        | ENST00000326441 | 0,871576026 |
| A_33_P3364268  | NM_030915      | LBH            | limb bud and heart development homolog (mouse)                | ENST00000467242 | 0,871556911 |

|               |                 |              |                                                          |                 |             |
|---------------|-----------------|--------------|----------------------------------------------------------|-----------------|-------------|
| A_24_P145911  | ENST00000342294 | TRA2B        | transformer 2 beta homolog (Drosophila)                  | ENST00000342294 | 0,871508486 |
| A_23_P371076  | ENST00000472022 | KLF12        | Kruppel-like factor 12                                   | ENST00000472022 | 0,871367974 |
| A_33_P3243519 | NM_001164387    | RAPGEF6      | Rap guanine nucleotide exchange factor (GEF) 6           | ENST00000358714 | 0,870958384 |
| A_24_P349196  | NM_001080850    | CCDC30       | coiled-coil domain containing 30                         | ENST00000340612 | 0,870557245 |
| A_23_P326931  | NM_145170       | TTC18        | tetratricopeptide repeat domain 18                       | ENST00000394865 | 0,870209482 |
| A_23_P108932  | NR_002229       | RPL23AP32    | ribosomal protein L23a pseudogene 32                     |                 | 0,869806799 |
| A_33_P3245454 | NR_027420       | LOC389834    | ankyrin repeat domain 57 pseudogene                      |                 | 0,869469969 |
| A_24_P13285   | NM_006741       | PPP1R1A      | protein phosphatase 1, regulatory (inhibitor) subunit 1A | ENST00000257905 | 0,869058284 |
| A_32_P12994   | NR_034128       | LOC440900    | uncharacterized LOC440900                                | ENST00000412690 | 0,868848494 |
| A_23_P108404  | NM_001037131    | AGAP1        | ArfGAP with GTPase domain, ankyrin repeat and PH domain  | ENST00000304032 | 0,86880935  |
| A_21_P0005128 | TCONS_00012569  | XLOC_005426  |                                                          |                 | 0,868364873 |
| A_33_P3254013 | ENST00000515868 | GAK          | cyclin G associated kinase                               | ENST00000515868 | 0,868023051 |
| A_33_P3230017 | NR_001587       | AURKAPS1     | aurora kinase A pseudogene 1                             | ENST00000462353 | 0,867923816 |
| A_21_P0009383 | TCONS_00025865  | XLOC_012142  |                                                          |                 | 0,867771375 |
| A_33_P3227904 | NM_207348       | SLC25A34     | solute carrier family 25, member 34                      | ENST00000294454 | 0,867300983 |
| A_33_P3235642 | NM_001193272    | RBBP5        | retinoblastoma binding protein 5                         | ENST00000367164 | 0,867031049 |
| A_21_P0004898 | TCONS_00011856  | XLOC_005347  |                                                          |                 | 0,866830348 |
| A_24_P254705  | NM_020394       | ZNF695       | zinc finger protein 695                                  | ENST00000391780 | 0,866694276 |
| A_23_P109254  | NM_184234       | RBM39        | RNA binding motif protein 39                             | ENST00000465158 | 0,866585049 |
| A_23_P120170  | NM_145702       | TIGD1        | tigger transposable element derived 1                    | ENST00000408957 | 0,866380952 |
| A_21_P0010393 | TCONS_00029518  | XLOC_014159  |                                                          |                 | 0,866124643 |
| A_21_P0014503 | XR_110124       | LOC100507398 | uncharacterized LOC100507398                             |                 | 0,866040657 |
| A_21_P0011342 | AK127420        | LOC400464    | uncharacterized LOC400464                                |                 | 0,865813834 |
| A_23_P377411  | AF130105        | LOC100133130 | PRO1102                                                  |                 | 0,865739036 |
| A_33_P3285629 | NM_023036       | DNAI2        | dynein, axonemal, intermediate chain 2                   | ENST00000307504 | 0,865330596 |
| A_24_P921327  | ENST00000505317 | TAPT1        | transmembrane anterior posterior transformation 1        | ENST00000505317 | 0,865222325 |
| A_21_P0014224 | XR_108920       | LOC100505760 | uncharacterized LOC100505760                             |                 | 0,863303137 |
| A_33_P3415340 | ENST00000410052 | ALS2         | amyotrophic lateral sclerosis 2 (juvenile)               | ENST00000410052 | 0,863290995 |
| A_23_P64280   | XR_110533       | LOC100130428 | IGYY565                                                  |                 | 0,863251199 |



|                |                  |                |                                                               |                 |  |             |
|----------------|------------------|----------------|---------------------------------------------------------------|-----------------|--|-------------|
| A_21_P0010959  | TCONS_I2_0000433 | XLOC_I2_002194 |                                                               |                 |  | 0,862829597 |
| A_23_P26124    | NM_134260        | RORA           | RAR-related orphan receptor A                                 | ENST00000261523 |  | 0,861552005 |
| A_24_P706314   | NM_194247        | HNRNPA3        | heterogeneous nuclear ribonucleoprotein A3                    |                 |  | 0,861373616 |
| A_33_P3246248  | AK093187         | LOC729879      | uncharacterized LOC729879                                     |                 |  | 0,861197234 |
| A_21_P0001350  | ENST00000412513  | XLOC_000312    |                                                               | ENST00000412513 |  | 0,860993132 |
| A_24_P15621    | NR_003083        | SLC6A10P       | solute carrier family 6 (neurotransmitter transporter, creati | ENST00000359871 |  | 0,860868354 |
| A_23_P201951   | NM_016374        | ARID4B         | AT rich interactive domain 4B (RBP1-like)                     | ENST00000264183 |  | 0,860748072 |
| A_24_P274615   | NM_020801        | ARRDC3         | arrestin domain containing 3                                  | ENST00000265138 |  | 0,86044299  |
| A_33_P3305058  | ENST00000451399  | CUL9           | cullin 9                                                      | ENST00000451399 |  | 0,860336956 |
| A_24_P785293   | NR_003098        | SNHG1          | small nucleolar RNA host gene 1 (non-protein coding)          |                 |  | 0,859744903 |
| A_24_P396167   | NM_001335        | CTSW           | cathepsin W                                                   | ENST00000307886 |  | 0,85926801  |
| A_33_P3324137  | BC015320         | PRO0628        | uncharacterized LOC29053                                      |                 |  | 0,858682096 |
| A_33_P3732466  | AL359570         | DKFZp547G183   | uncharacterized LOC55525                                      |                 |  | 0,858139621 |
| A_23_P120170   | NM_145702        | TIGD1          | tigger transposable element derived 1                         | ENST00000408957 |  | 0,857946058 |
| A_21_P0000142  | NM_001198952     | RNF103         | ring finger protein 103                                       | ENST00000465629 |  | 0,857334368 |
| A_21_P0014278  | NR_045382        | LOC100507066   | uncharacterized LOC100507066                                  |                 |  | 0,857141247 |
| A_23_P13548    | NM_015424        | CHRD12         | chordin-like 2                                                | ENST00000376332 |  | 0,856756027 |
| A_21_P0000268  | NR_002584        | SNORA69        | small nucleolar RNA, H/ACA box 69                             | ENST00000477403 |  | 0,856743034 |
| A_21_P0010779  | ENST00000441085  | XLOC_I2_001138 |                                                               | ENST00000441085 |  | 0,856496348 |
| A_33_P3264780  | NM_001260        | CDK8           | cyclin-dependent kinase 8                                     | ENST00000477290 |  | 0,856287501 |
| A_21_P0002967  | ENST00000481004  | XLOC_002688    |                                                               | ENST00000481004 |  | 0,856209831 |
| A_33_P3212394  | NM_001124759     | FRG2C          | FSDH region gene 2 family, member C                           | ENST00000403385 |  | 0,855910571 |
| A_32_P516067   | NM_153244        | C10orf111      | chromosome 10 open reading frame 111                          | ENST00000378207 |  | 0,855727949 |
| A_21_P0011998  | TCONS_I2_0001523 | XLOC_I2_007186 |                                                               |                 |  | 0,855507148 |
| A_24_P261750   | NM_007035        | KERA           | keratocan                                                     | ENST00000266719 |  | 0,855426396 |
| A_21_P0013650  | TCONS_I2_0002934 | XLOC_I2_015212 |                                                               |                 |  | 0,854845574 |
| A_33_P3252196  | NM_004456        | EZH2           | enhancer of zeste homolog 2 (Drosophila)                      | ENST00000320356 |  | 0,854677498 |
| A_24_P764690   | ENST00000544044  | ZNF720         | zinc finger protein 720                                       | ENST00000544044 |  | 0,85450203  |
| A_19_P00317272 | NR_034128        | LOC440900      | uncharacterized LOC440900                                     | ENST00000412690 |  | 0,854018791 |

|                |                  |                |                                                             |                 |             |
|----------------|------------------|----------------|-------------------------------------------------------------|-----------------|-------------|
| A_33_P3387691  | NM_198081        | SCML4          | sex comb on midleg-like 4 (Drosophila)                      | ENST00000369022 | 0,853384388 |
| A_33_P3262485  | NM_145276        | ZNF563         | zinc finger protein 563                                     | ENST00000293725 | 0,853198986 |
| A_32_P36143    | XR_112950        | LOC729088      | uncharacterized LOC729088                                   |                 | 0,852676459 |
| A_33_P3327076  | NM_001001824     | OR2T27         | olfactory receptor, family 2, subfamily T, member 27        | ENST00000344889 | 0,852013318 |
| A_23_P254768   | NR_002139        | HCG4           | HLA complex group 4 (non-protein coding)                    |                 | 0,851484598 |
| A_33_P3267460  | NM_134428        | RFX3           | regulatory factor X, 3 (influences HLA class II expression) | ENST00000381984 | 0,851377572 |
| A_21_P0009822  | ENST00000418739  | XLOC_013439    |                                                             | ENST00000418739 | 0,850990059 |
| A_19_P00805452 | TCONS_I2_0002039 | XLOC_I2_010558 |                                                             |                 | 0,850518764 |
| A_33_P3344277  | BC057389         | HS1BP3         | HCLS1 binding protein 3                                     | ENST00000402541 | 0,849640272 |
| A_19_P00810009 | ENST00000551631  | LOC100506948   |                                                             | ENST00000551631 | 0,849325018 |
| A_33_P3264895  | NM_144593        | RHEBL1         | Ras homolog enriched in brain like 1                        | ENST00000420065 | 0,849182886 |
| A_21_P0000207  | NR_000007        | SNORD73A       | small nucleolar RNA, C/D box 73A                            | ENST00000322686 | 0,848829031 |
| A_21_P0000557  | NR_028303        | LOC100302640   | uncharacterized LOC100302640                                |                 | 0,848525806 |
| A_33_P3277953  | NR_027333        | LOC100128811   | uncharacterized LOC100128811                                |                 | 0,848230464 |
| A_24_P146211   | NM_021063        | HIST1H2BD      | histone cluster 1, H2bd                                     | ENST00000377777 | 0,848059569 |
| A_21_P0002006  | ENST00000414795  | XLOC_001966    |                                                             | ENST00000414795 | 0,848033545 |
| A_21_P0000155  | NM_001204453     | PSMC2          | proteasome (prosome, macropain) 26S subunit, ATPase, 2      | ENST00000460021 | 0,847544966 |
| A_21_P0004624  | ENST00000440848  | XLOC_005128    |                                                             | ENST00000440848 | 0,847431573 |
| A_23_P108404   | NM_001037131     | AGAP1          | ArfGAP with GTPase domain, ankyrin repeat and PH domain     | ENST00000304032 | 0,847078654 |
| A_24_P415280   | NM_018144        | SEC61A2        | Sec61 alpha 2 subunit (S. cerevisiae)                       | ENST00000426560 | 0,84675189  |
| A_23_P52986    | NM_152718        | VWCE           | von Willebrand factor C and EGF domains                     | ENST00000335613 | 0,846360392 |
| A_24_P378402   | NM_152457        | ZNF597         | zinc finger protein 597                                     | ENST00000301744 | 0,84619019  |
| A_21_P0000470  | NR_003695        | SNORD12B       | small nucleolar RNA, C/D box 12B                            |                 | 0,845491226 |
| A_33_P3290443  | NR_002569        | SCARNA9        | small Cajal body-specific RNA 9                             | ENST00000530422 | 0,845484066 |
| A_21_P0000388  | NR_003072        | SNORD91A       | small nucleolar RNA, C/D box 91A                            |                 | 0,845033137 |
| A_33_P3421520  | NM_022466        | IKZF5          | IKAROS family zinc finger 5 (Pegasus)                       | ENST00000368886 | 0,843647539 |
| A_21_P0006182  | TCONS_00016075   | XLOC_007464    |                                                             |                 | 0,843275705 |
| A_33_P3345796  | ENST00000368982  | SNX3           | sorting nexin 3                                             | ENST00000368982 | 0,842756586 |
| A_33_P3304865  | BC031633         | LTN1           | listerin E3 ubiquitin protein ligase 1                      | ENST00000389195 | 0,842658229 |

|                |                 |                |                                                        |                 |             |
|----------------|-----------------|----------------|--------------------------------------------------------|-----------------|-------------|
| A_21_P0012894  | ENST00000515123 | XLOC_I2_011959 |                                                        | ENST00000515123 | 0,842619812 |
| A_33_P3346937  | NM_015026       | MON2           | MON2 homolog (S. cerevisiae)                           | ENST00000393630 | 0,842266945 |
| A_21_P0007364  | TCONS_00019671  | XLOC_009475    |                                                        |                 | 0,842166528 |
| A_23_P411723   | NM_002655       | PLAG1          | pleiomorphic adenoma gene 1                            | ENST00000316981 | 0,8420665   |
| A_24_P387321   | NM_016264       | ZNF44          | zinc finger protein 44                                 | ENST00000355684 | 0,841993902 |
| A_21_P0008899  | TCONS_00024308  | XLOC_011618    |                                                        |                 | 0,840877975 |
| A_24_P213715   | NR_026993       | LOC90834       | uncharacterized protein BC001742                       |                 | 0,840670254 |
| A_32_P104518   | NR_023389       | LINC00476      | long intergenic non-protein coding RNA 476             |                 | 0,840537278 |
| A_24_P677642   | NR_038275       | FLJ31813       | FAM21B pseudogene                                      | ENST00000456967 | 0,84037919  |
| A_21_P0013261  | ENST00000440208 | XLOC_I2_013554 |                                                        | ENST00000440208 | 0,840057065 |
| A_19_P00802872 | NR_001564       | XIST           | X (inactive)-specific transcript (non-protein coding)  |                 | 0,839741744 |
| A_32_P930685   | NR_027481       | ZNF876P        | zinc finger protein 876, pseudogene                    | ENST00000356347 | 0,839710824 |
| A_23_P99853    | NM_019600       | KIAA1370       | KIAA1370                                               | ENST00000546305 | 0,839486349 |
| A_21_P0000239  | NR_002434       | SNORD101       | small nucleolar RNA, C/D box 101                       |                 | 0,83926724  |
| A_23_P108501   | NM_004438       | EPHA4          | EPH receptor A4                                        | ENST00000392071 | 0,839151279 |
| A_19_P00322687 | NM_001242690    | ERVMER34-1     |                                                        |                 | 0,838482365 |
| A_19_P00809548 | NR_026999       | LINC00265      | long intergenic non-protein coding RNA 265             |                 | 0,83789583  |
| A_21_P0000400  | NR_003195       | SNORD114-3     | small nucleolar RNA, C/D box 114-3                     |                 | 0,8378454   |
| A_21_P0007465  | TCONS_00020094  | XLOC_009485    |                                                        |                 | 0,837272248 |
| A_21_P0000847  | NR_038942       | LOC100630918   | uncharacterized LOC100630918                           |                 | 0,837004673 |
| A_23_P150609   | NM_000612       | IGF2           | insulin-like growth factor 2 (somatomedin A)           | ENST00000381319 | 0,835342133 |
| A_21_P0014030  | NM_001193466    | KIAA1267       | KIAA1267                                               | ENST00000552923 | 0,835094932 |
| A_23_P99275    | NM_002258       | KLRB1          | killer cell lectin-like receptor subfamily B, member 1 | ENST00000229402 | 0,835055718 |
| A_21_P0014861  | ENST00000556578 | LOC100652952   |                                                        | ENST00000556578 | 0,835001825 |
| A_33_P3276142  | NR_003260       | DNM1P46        | DNM1 pseudogene 46                                     | ENST00000448059 | 0,834846104 |
| A_21_P0008028  | TCONS_00021716  | XLOC_010301    |                                                        |                 | 0,834650872 |
| A_23_P255331   | NM_032623       | C4orf49        | chromosome 4 open reading frame 49                     | ENST00000398955 | 0,834547871 |
| A_33_P3320052  | XM_001714987    | ARMCX3-AS1     | ARMCX3 antisense RNA 1 (non-protein coding)            |                 | 0,833674675 |
| A_33_P3300147  | NM_001001709    | C9orf170       | chromosome 9 open reading frame 170                    |                 | 0,832571116 |

|               |                 |                |                                                            |                 |             |
|---------------|-----------------|----------------|------------------------------------------------------------|-----------------|-------------|
| A_21_P0000321 | NR_002967       | SNORA31        | small nucleolar RNA, H/ACA box 31                          | ENST00000534033 | 0,832143878 |
| A_24_P348203  | NM_025061       | LRR8E          | leucine rich repeat containing 8 family, member E          | ENST00000306708 | 0,832134289 |
| A_23_P165201  | NM_021232       | PRODH2         | proline dehydrogenase (oxidase) 2                          | ENST00000301175 | 0,832116037 |
| A_23_P116942  | NM_002286       | LAG3           | lymphocyte-activation gene 3                               | ENST00000203629 | 0,831911675 |
| A_33_P3220390 | BC028180        | WTAP           | Wilms tumor 1 associated protein                           |                 | 0,831821141 |
| A_33_P3224795 | NM_022466       | IKZF5          | IKAROS family zinc finger 5 (Pegasus)                      | ENST00000368886 | 0,831499664 |
| A_21_P0000492 | NR_004384       | SNAR-F         | small ILF3/NF90-associated RNA F                           |                 | 0,830976593 |
| A_23_P65797   | NM_022480       | KLHL25         | kelch-like 25 (Drosophila)                                 | ENST00000337975 | 0,830417003 |
| A_21_P0006122 | TCONS_00015913  | XLOC_007276    |                                                            |                 | 0,828863328 |
| A_33_P3392807 | ENST00000490432 | TAF1B          | TATA box binding protein (TBP)-associated factor, RNA poly | ENST00000490432 | 0,828832236 |
| A_21_P0000248 | NR_002444       | SNORA66        | small nucleolar RNA, H/ACA box 66                          |                 | 0,828263204 |
| A_23_P326142  | NR_027330       | C7orf54        | chromosome 7 open reading frame 54                         |                 | 0,828054139 |
| A_33_P3363091 | U25801          | VAC14          | Vac14 homolog (S. cerevisiae)                              |                 | 0,827663982 |
| A_33_P3410859 | NR_003288       | LOC729603      | calcium binding protein P22 pseudogene                     |                 | 0,827223151 |
| A_21_P0005578 | TCONS_00014218  | XLOC_006259    |                                                            |                 | 0,827172155 |
| A_32_P120791  | BC040303        | LOC727916      | uncharacterized LOC727916                                  |                 | 0,826879953 |
| A_23_P500998  | NM_152739       | HOXA9          | homeobox A9                                                | ENST00000242050 | 0,826548684 |
| A_21_P0008893 | BC033994        | XLOC_011800    |                                                            |                 | 0,825904462 |
| A_23_P106194  | NM_005252       | FOS            | FBJ murine osteosarcoma viral oncogene homolog             | ENST00000303562 | 0,825532495 |
| A_33_P3400424 | NM_001199324    | ZNF615         | zinc finger protein 615                                    | ENST00000391793 | 0,824305427 |
| A_23_P156445  | NM_018665       | DDX43          | DEAD (Asp-Glu-Ala-Asp) box polypeptide 43                  | ENST00000370336 | 0,824207352 |
| A_32_P60459   | NM_001145373    | OTUD1          | OTU domain containing 1                                    | ENST00000376495 | 0,824047379 |
| A_33_P3284009 | NR_027249       | GNN            | Grp94 neighboring nucleotidase pseudogene                  | ENST00000388789 | 0,823853568 |
| A_21_P0000394 | NR_003078       | SNORD110       | small nucleolar RNA, C/D box 110                           | ENST00000494697 | 0,823821216 |
| A_24_P251661  | NM_171828       | KCNMB3         | potassium large conductance calcium-activated channel, su  | ENST00000485523 | 0,823601568 |
| A_23_P164042  | NM_001433       | ERN1           | endoplasmic reticulum to nucleus signaling 1               | ENST00000433197 | 0,823600286 |
| A_33_P3268793 | NM_138422       | ADAT3          | adenosine deaminase, tRNA-specific 3                       | ENST00000329478 | 0,823242157 |
| A_21_P0012102 | ENST00000417006 | XLOC_I2_008405 |                                                            | ENST00000417006 | 0,823235111 |
| A_23_P258944  | NM_012328       | DNAJB9         | DnaJ (Hsp40) homolog, subfamily B, member 9                | ENST00000249356 | 0,822983323 |

|                |                  |                |                                                                                  |                 |             |
|----------------|------------------|----------------|----------------------------------------------------------------------------------|-----------------|-------------|
| A_21_P0000264  | NR_002579        | SNORD74        | small nucleolar RNA, C/D box 74                                                  |                 | 0,822867805 |
| A_23_P108404   | NM_001037131     | AGAP1          | ArfGAP with GTPase domain, ankyrin repeat and PH domain                          | ENST00000304032 | 0,821933379 |
| A_21_P0011931  | NM_170606        | MLL3           | myeloid/lymphoid or mixed-lineage leukemia 3                                     | ENST00000436174 | 0,821394531 |
| A_33_P3372600  | XR_109159        | LOC100129119   | uncharacterized LOC100129119                                                     |                 | 0,821353414 |
| A_33_P3312222  | XM_001131091     | LOC729706      | putative TAF11-like protein ENSP00000332601-like                                 |                 | 0,82097287  |
| A_23_P400945   | NM_005240        | ETV3           | ets variant 3                                                                    | ENST00000326786 | 0,820696353 |
| A_21_P0000267  | NR_002583        | SNORD72        | small nucleolar RNA, C/D box 72                                                  |                 | 0,820552489 |
| A_21_P0004689  | ENST00000434255  | XLOC_005471    |                                                                                  | ENST00000434255 | 0,820390168 |
| A_23_P206077   | NM_022767        | AEN            | apoptosis enhancing nuclease                                                     | ENST00000332810 | 0,820214577 |
| A_23_P59069    | NM_003527        | HIST1H2BO      | histone cluster 1, H2bo                                                          | ENST00000303806 | 0,820174676 |
| A_33_P3651282  | ENST00000546204  | TCP1           | t-complex 1                                                                      | ENST00000546204 | 0,820133811 |
| A_21_P0013262  | TCONS_I2_0002615 | XLOC_I2_013554 |                                                                                  |                 | 0,820014012 |
| A_24_P321634   | NM_001039650     | ZMYM5          | zinc finger, MYM-type 5                                                          | ENST00000467542 | 0,819969674 |
| A_33_P3390955  | NR_004422        | HPVC1          | human papillomavirus (type 18) E5 central sequence-like 1                        |                 | 0,819962614 |
| A_24_P126262   | NM_181704        | BAGE4          | B melanoma antigen family, member 4                                              | ENST00000470054 | 0,819366985 |
| A_33_P3357759  | XM_291007        | HEATR7B1       | HEAT repeat containing 7B1                                                       | ENST00000389758 | 0,818935361 |
| A_24_P110291   | NR_036511        | LOC100129917   | uncharacterized LOC100129917                                                     |                 | 0,818350246 |
| A_33_P3266923  | NM_014916        | LMTK2          | lemur tyrosine kinase 2                                                          | ENST00000297293 | 0,817842147 |
| A_33_P3558740  | AK057616         | LOC254100      | uncharacterized LOC254100                                                        |                 | 0,817777152 |
| A_21_P0013752  | THC2774467       | XLOC_I2_015441 |                                                                                  |                 | 0,817502955 |
| A_21_P0011412  | BC101081         | DNM1P46        | DNM1 pseudogene 46                                                               |                 | 0,817251934 |
| A_19_P00316919 | NR_027058        | LINC00338      | long intergenic non-protein coding RNA 338                                       | ENST00000434411 | 0,817179951 |
| A_21_P0000751  | NR_038286        | LOC100507062   | uncharacterized LOC100507062                                                     | ENST00000472046 | 0,817040129 |
| A_21_P0004563  | BX109598         | XLOC_004901    |                                                                                  |                 | 0,816652947 |
| A_24_P340941   | NR_036507        | LOC100306975   | NADH dehydrogenase (ubiquinone) 1 alpha subcomplex, assembly factor 4 pseudogene |                 | 0,816621795 |
| A_33_P3389779  | ENST00000408998  | WDR33          | WD repeat domain 33                                                              | ENST00000408998 | 0,816098632 |
| A_23_P119042   | NM_005601        | NKG7           | natural killer cell group 7 sequence                                             | ENST00000221978 | 0,815819434 |
| A_33_P3326588  | NM_003840        | TNFRSF10D      | tumor necrosis factor receptor superfamily, member 10d, d                        | ENST00000312584 | 0,815684802 |
| A_24_P71439    | NM_015317        | PUM2           | pumilio homolog 2 (Drosophila)                                                   | ENST00000403432 | 0,815674899 |



|               |                 |              |                                                            |                 |             |
|---------------|-----------------|--------------|------------------------------------------------------------|-----------------|-------------|
| A_23_P308632  | NM_152769       | C19orf26     | chromosome 19 open reading frame 26                        | ENST00000215376 | 0,815497774 |
| A_24_P32139   | NM_182589       | HTR3E        | 5-hydroxytryptamine (serotonin) receptor 3, family membe   | ENST00000415389 | 0,815301413 |
| A_21_P0000459 | NR_003684       | SNORD119     | small nucleolar RNA, C/D box 119                           |                 | 0,815277624 |
| A_21_P0001119 | ENST00000453837 | XLOC_000772  |                                                            | ENST00000453837 | 0,814926729 |
| A_32_P37592   | NR_003003       | SCARNA17     | small Cajal body-specific RNA 17                           |                 | 0,81477945  |
| A_21_P0004720 | ENST00000415144 | XLOC_005587  |                                                            | ENST00000415144 | 0,813663601 |
| A_33_P3284045 | NM_199347       | NEK10        | NIMA (never in mitosis gene a)- related kinase 10          | ENST00000341435 | 0,813580572 |
| A_33_P3258581 | NR_024425       | LOC389791    | uncharacterized LOC389791                                  |                 | 0,813506972 |
| A_33_P3289000 | ENST00000409375 | AP1S3        | adaptor-related protein complex 1, sigma 3 subunit         | ENST00000409375 | 0,812812262 |
| A_33_P3305855 | AB593152        | LOC645967    | uncharacterized LOC645967                                  |                 | 0,81260885  |
| A_33_P3362770 | NM_018427       | RRN3         | RRN3 RNA polymerase I transcription factor homolog (S. ce  | ENST00000327307 | 0,812567736 |
| A_21_P0014534 | XR_110228       | LOC100506659 | uncharacterized LOC100506659                               |                 | 0,812517996 |
| A_33_P3293169 | NM_017749       | AMBRA1       | autophagy/beclin-1 regulator 1                             | ENST00000314823 | 0,811764661 |
| A_33_P3272429 | ENST00000472407 | CCDC126      | coiled-coil domain containing 126                          | ENST00000472407 | 0,811108221 |
| A_21_P0006318 | TCONS_00016476  | XLOC_007848  |                                                            |                 | 0,810783243 |
| A_33_P3374035 | AK094630        | PDXK         | pyridoxal (pyridoxine, vitamin B6) kinase                  |                 | 0,810600147 |
| A_33_P3227842 | NM_001166006    | EPB41        | erythrocyte membrane protein band 4.1 (elliptocytosis 1, R | ENST00000373797 | 0,81055272  |
| A_24_P68222   | NR_033381       | CD99P1       | CD99 molecule pseudogene 1                                 | ENST00000430562 | 0,810530326 |
| A_24_P122732  | NM_173854       | SLC41A1      | solute carrier family 41, member 1                         | ENST00000468057 | 0,810524201 |
| A_33_P3328445 | AK074580        | LOC100506713 | uncharacterized LOC100506713                               | ENST00000399540 | 0,810237061 |
| A_33_P3382856 | NM_133507       | DCN          | decorin                                                    | ENST00000456569 | 0,810211688 |
| A_21_P0014279 | XR_109102       | LOC100293704 | uncharacterized LOC100293704                               |                 | 0,810071819 |
| A_23_P41359   | NM_014487       | ZNF330       | zinc finger protein 330                                    | ENST00000507532 | 0,809955175 |
| A_33_P3267118 | ENST00000374933 | EIF4G3       | eukaryotic translation initiation factor 4 gamma, 3        | ENST00000374933 | 0,809485133 |
| A_33_P3256778 | NM_000614       | CNTF         | ciliary neurotrophic factor                                |                 | 0,809325013 |
| A_21_P0002938 | TCONS_00005966  | XLOC_002597  |                                                            |                 | 0,808886311 |
| A_21_P0014806 | XR_132626       | LOC100507131 | uncharacterized LOC100507131                               |                 | 0,808371041 |
| A_24_P135427  | NR_036508       | LOC100128398 | uncharacterized LOC100128398                               | ENST00000313957 | 0,808194943 |
| A_21_P0005772 | TCONS_00014874  | XLOC_006941  |                                                            |                 | 0,808189116 |

|                |                  |                |                                                               |                 |             |
|----------------|------------------|----------------|---------------------------------------------------------------|-----------------|-------------|
| A_21_P0009582  | TCONS_00026568   | XLOC_012886    |                                                               |                 | 0,807805352 |
| A_21_P0003369  | ENST00000508135  | XLOC_003549    |                                                               | ENST00000508135 | 0,807622768 |
| A_21_P0000511  | NR_024342        | SNAR-H         | small ILF3/NF90-associated RNA H                              |                 | 0,807279618 |
| A_21_P0012473  | NM_007146        | VEZF1          | vascular endothelial zinc finger 1                            | ENST00000258963 | 0,807270598 |
| A_21_P0013510  | ENST00000519902  | XLOC_I2_014459 |                                                               | ENST00000519902 | 0,8070925   |
| A_21_P0014390  | ENST00000476474  | LOC100507111   |                                                               | ENST00000476474 | 0,807067758 |
| A_21_P0013346  | ENST00000451962  | XLOC_I2_013963 |                                                               | ENST00000451962 | 0,806198381 |
| A_23_P125042   | NM_013360        | ZNF222         | zinc finger protein 222                                       | ENST00000251272 | 0,80609317  |
| A_21_P0014070  | ENST00000444037  | LOC100506855   |                                                               | ENST00000444037 | 0,806040686 |
| A_21_P0014018  | XM_003403487     | LOC100652736   | uncharacterized protein LOC100652736                          |                 | 0,805644127 |
| A_23_P130482   | NM_198855        | ZNF211         | zinc finger protein 211                                       | ENST00000254182 | 0,805420265 |
| A_23_P8013     | NM_003519        | HIST1H2BL      | histone cluster 1, H2bl                                       | ENST00000377401 | 0,80505917  |
| A_33_P3257678  | NM_001005464     | HIST2H3A       | histone cluster 2, H3a                                        | ENST00000369158 | 0,804788875 |
| A_21_P0008383  | TCONS_00022622   | XLOC_010922    |                                                               |                 | 0,804512012 |
| A_23_P307310   | NM_013227        | ACAN           | aggrecan                                                      | ENST00000439576 | 0,80450529  |
| A_19_P00806753 | NR_038889        | LOC401320      | uncharacterized LOC401320                                     | ENST00000426529 | 0,804486488 |
| A_21_P0011941  | TCONS_I2_0001474 | XLOC_I2_008163 |                                                               |                 | 0,803934591 |
| A_32_P113566   | NM_152733        | BTBD9          | BTB (POZ) domain containing 9                                 | ENST00000403056 | 0,803891471 |
| A_33_P3322050  | NM_130438        | DYRK1A         | dual-specificity tyrosine-(Y)-phosphorylation regulated kina: | ENST00000321219 | 0,803541766 |
| A_23_P256244   | ENST00000497705  | OXR1           | oxidation resistance 1                                        | ENST00000497705 | 0,803422411 |
| A_33_P3228300  | NM_005772        | RCL1           | RNA terminal phosphate cyclase-like 1                         | ENST00000381730 | 0,803171585 |
| A_23_P108932   | NR_002229        | RPL23AP32      | ribosomal protein L23a pseudogene 32                          |                 | 0,803086336 |
| A_21_P0006782  | ENST00000444965  | XLOC_008907    |                                                               | ENST00000444965 | 0,803008757 |
| A_33_P3398862  | NM_004040        | RHOB           | ras homolog gene family, member B                             | ENST00000272233 | 0,802307774 |
| A_23_P369343   | NM_144505        | KLK8           | kallikrein-related peptidase 8                                | ENST00000391806 | 0,801941731 |
| A_21_P0002265  | TCONS_00004866   | XLOC_001608    |                                                               |                 | 0,801742206 |
| A_23_P87013    | NM_001001522     | TAGLN          | transgelin                                                    | ENST00000392951 | 0,80079703  |
| A_23_P301247   | NM_003517        | HIST2H2AC      | histone cluster 2, H2ac                                       | ENST00000331380 | 0,800271117 |
| A_21_P0000381  | NR_003058        | SNORD70        | small nucleolar RNA, C/D box 70                               |                 | 0,800229998 |

|                |                 |                |                                                               |                 |             |
|----------------|-----------------|----------------|---------------------------------------------------------------|-----------------|-------------|
| A_23_P301328   | ENST00000476313 | PDXK           | pyridoxal (pyridoxine, vitamin B6) kinase                     | ENST00000476313 | 0,799939122 |
| A_23_P164468   | NM_014913       | ADNP2          | ADNP homeobox 2                                               | ENST00000262198 | 0,799674655 |
| A_23_P16652    | NM_152791       | ZNF555         | zinc finger protein 555                                       | ENST00000334241 | 0,799543654 |
| A_21_P0000257  | NR_002563       | SNORD27        | small nucleolar RNA, C/D box 27                               |                 | 0,799389532 |
| A_33_P3246858  | ENST00000393149 | TBX15          | T-box 15                                                      | ENST00000393149 | 0,799362404 |
| A_33_P3299386  | NM_001039654    | ZNF550         | zinc finger protein 550                                       | ENST00000506609 | 0,799311636 |
| A_23_P45913    | NM_004814       | SNRNP40        | small nuclear ribonucleoprotein 40kDa (U5)                    | ENST00000474025 | 0,799143817 |
| A_21_P0011130  | THC2506137      | XLOC_I2_003647 |                                                               |                 | 0,798794057 |
| A_23_P372988   | NM_001134316    | PRR22          | proline rich 22                                               | ENST00000390672 | 0,798481387 |
| A_33_P3310070  | NM_004514       | FOXK2          | forkhead box K2                                               | ENST00000335241 | 0,797766831 |
| A_19_P00324399 | XR_110378       | LOC100507317   | uncharacterized LOC100507317                                  | ENST00000553135 | 0,797656977 |
| A_23_P366216   | NM_003524       | HIST1H2BH      | histone cluster 1, H2bh                                       | ENST00000356350 | 0,797651311 |
| A_23_P95594    | NM_000662       | NAT1           | N-acetyltransferase 1 (arylamine N-acetyltransferase)         | ENST00000520546 | 0,797608691 |
| A_24_P345209   | NM_001004023    | DYRK3          | dual-specificity tyrosine-(Y)-phosphorylation regulated kina: | ENST00000367106 | 0,7972747   |
| A_23_P145024   | NM_000024       | ADRB2          | adrenergic, beta-2-, receptor, surface                        | ENST00000305988 | 0,796861618 |
| A_33_P3552465  | ENST00000463067 | ZNF852         | zinc finger protein 852                                       | ENST00000463067 | 0,796848473 |
| A_23_P209954   | NM_006433       | GNLY           | granulysin                                                    | ENST00000489980 | 0,796401603 |
| A_21_P0007854  | TCONS_00021223  | XLOC_009911    |                                                               |                 | 0,796209827 |
| A_21_P0000279  | NR_002735       | SNORD61        | small nucleolar RNA, C/D box 61                               |                 | 0,796069397 |
| A_21_P0003792  | TCONS_00008639  | XLOC_004144    |                                                               |                 | 0,79575534  |
| A_33_P3379486  | AK127427        | LOC100130581   | uncharacterized LOC100130581                                  |                 | 0,795241347 |
| A_23_P346376   | NM_014499       | P2RY10         | purinergic receptor P2Y, G-protein coupled, 10                | ENST00000475374 | 0,794880996 |
| A_33_P3340718  | NM_021140       | KDM6A          | lysine (K)-specific demethylase 6A                            | ENST00000334516 | 0,794098054 |
| A_21_P0000062  | NM_001166242    | C22orf39       | chromosome 22 open reading frame 39                           | ENST00000542103 | 0,792898405 |
| A_21_P0013267  | NR_026999       | LINC00265      | long intergenic non-protein coding RNA 265                    | ENST00000427210 | 0,792438743 |
| A_23_P9289     | NM_134428       | RFX3           | regulatory factor X, 3 (influences HLA class II expression)   | ENST00000458034 | 0,792355624 |
| A_21_P0010027  | TCONS_00028351  | XLOC_013702    |                                                               |                 | 0,791379005 |
| A_33_P3265714  | NM_173649       | C2orf61        | chromosome 2 open reading frame 61                            |                 | 0,791209403 |
| A_32_P319858   | NM_198478       | NKPD1          | NTPase, KAP family P-loop domain containing 1                 | ENST00000429338 | 0,790821594 |

|                |                 |              |                                                                            |                 |             |
|----------------|-----------------|--------------|----------------------------------------------------------------------------|-----------------|-------------|
| A_19_P00322440 | NR_036444       | LOC400550    | uncharacterized LOC400550                                                  |                 | 0,7904486   |
| A_21_P0008484  | ENST00000502187 | XLOC_011117  |                                                                            | ENST00000502187 | 0,790244377 |
| A_21_P0003279  | TCONS_00007119  | XLOC_003052  |                                                                            |                 | 0,790166312 |
| A_21_P0000483  | NR_003941       | SNORD75      | small nucleolar RNA, C/D box 75                                            |                 | 0,789833893 |
| A_21_P0014748  | XR_133234       | LOC100653178 | uncharacterized LOC100653178                                               |                 | 0,789661117 |
| A_21_P0000366  | NR_003031       | SNORD11      | small nucleolar RNA, C/D box 11                                            |                 | 0,789556191 |
| A_21_P0007895  | ENST00000539956 | VSIG10       | V-set and immunoglobulin domain containing 10                              | ENST00000539956 | 0,789402219 |
| A_21_P0000461  | NR_003686       | SNORD125     | small nucleolar RNA, C/D box 125                                           |                 | 0,788025047 |
| A_24_P91405    | NM_152601       | ZNF709       | zinc finger protein 709                                                    | ENST00000397732 | 0,787915908 |
| A_21_P0006102  | ENST00000440009 | XLOC_007830  |                                                                            | ENST00000440009 | 0,787717828 |
| A_24_P184844   | AF006514        | CHD2         | chromodomain helicase DNA binding protein 2                                | ENST00000557381 | 0,787543204 |
| A_23_P70733    | NM_001033080    | TAAR2        | trace amine associated receptor 2                                          | ENST00000367931 | 0,787526037 |
| A_23_P67367    | NM_014475       | DHDH         | dihydrodiol dehydrogenase (dimeric)                                        | ENST00000520557 | 0,787492351 |
| A_33_P3330546  | NM_152557       | ZNF746       | zinc finger protein 746                                                    | ENST00000486492 | 0,787483017 |
| A_21_P0014876  | XR_132783       | LOC100652948 | uncharacterized LOC100652948                                               |                 | 0,787370193 |
| A_33_P3415430  | NM_005346       | HSPA1B       | heat shock 70kDa protein 1B                                                | ENST00000391548 | 0,786857595 |
| A_21_P0002944  | THC2668179      | XLOC_002616  |                                                                            |                 | 0,786833145 |
| A_33_P3226542  | NR_003271       | SNORD3B-1    | small nucleolar RNA, C/D box 3B-1                                          |                 | 0,786777567 |
| A_33_P3350343  | AK021845        | MLL          | myeloid/lymphoid or mixed-lineage leukemia (trithorax homolog, Drosophila) |                 | 0,786737922 |
| A_21_P0000245  | NR_002441       | SNORD18A     | small nucleolar RNA, C/D box 18A                                           |                 | 0,786547871 |
| A_21_P0001010  | TCONS_00000293  | XLOC_000377  |                                                                            |                 | 0,786404887 |
| A_33_P3248424  | NM_138348       | FAM105B      | family with sequence similarity 105, member B                              |                 | 0,785916406 |
| A_21_P0008274  | BC038722        | XLOC_011011  |                                                                            |                 | 0,785741259 |
| A_19_P00322900 | NR_003491       | MIAT         |                                                                            |                 | 0,785358511 |
| A_21_P0000509  | NR_024244       | SNAR-G2      | small ILF3/NF90-associated RNA G2                                          |                 | 0,784937777 |
| A_21_P0000294  | NR_002910       | SNORA71B     | small nucleolar RNA, H/ACA box 71B                                         |                 | 0,7843937   |
| A_21_P0012438  | NM_014831       | TRANK1       | tetratricopeptide repeat and ankyrin repeat containing 1                   | ENST00000505962 | 0,784303213 |
| A_21_P0000092  | NM_001174108    | ZBED6        | zinc finger, BED-type containing 6                                         | ENST00000550078 | 0,784288675 |
| A_21_P0001771  | AK022396        | FLJ12334     | uncharacterized LOC400946                                                  |                 | 0,784168555 |

|               |                 |              |                                                             |                 |             |
|---------------|-----------------|--------------|-------------------------------------------------------------|-----------------|-------------|
| A_21_P0006439 | ENST00000430235 | XLOC_008099  |                                                             | ENST00000430235 | 0,784085616 |
| A_24_P80532   | NM_004354       | CCNG2        | cyclin G2                                                   | ENST00000354403 | 0,784047924 |
| A_23_P145584  | NM_003344       | UBE2H        | ubiquitin-conjugating enzyme E2H                            | ENST00000355621 | 0,783977794 |
| A_32_P82475   | NR_003138       | SNHG10       | small nucleolar RNA host gene 10 (non-protein coding)       |                 | 0,783811336 |
| A_33_P3229452 | AK126441        | FLJ44477     | FLJ44477 protein                                            |                 | 0,783324699 |
| A_23_P401014  | NM_005744       | ARIH1        | ariadne homolog, ubiquitin-conjugating enzyme E2 binding    | ENST00000299305 | 0,783313085 |
| A_21_P0001840 | AL117577        | XLOC_001377  |                                                             | ENST00000450628 | 0,783191607 |
| A_24_P291658  | NM_000667       | ADH1A        | alcohol dehydrogenase 1A (class I), alpha polypeptide       | ENST00000412614 | 0,782996428 |
| A_33_P3297517 | NM_001243879    | TRA2B        | transformer 2 beta homolog (Drosophila)                     | ENST00000342294 | 0,782451621 |
| A_23_P117261  | NM_130806       | RXFP2        | relaxin/insulin-like family peptide receptor 2              | ENST00000298386 | 0,782138339 |
| A_21_P0014864 | XR_132756       | LOC100652761 | uncharacterized LOC100652761                                |                 | 0,782025633 |
| A_24_P48318   | NM_017748       | CWC25        | CWC25 spliceosome-associated protein homolog (S. cerevis)   | ENST00000536127 | 0,781785499 |
| A_21_P0010755 | NM_022064       | RNF123       | ring finger protein 123                                     | ENST00000443204 | 0,78141614  |
| A_21_P0014075 | XR_108352       | LOC339400    | uncharacterized LOC339400                                   |                 | 0,781376446 |
| A_33_P3400758 | NM_152791       | ZNF555       | zinc finger protein 555                                     | ENST00000382127 | 0,781270934 |
| A_21_P0000374 | NR_003046       | SNORD59B     | small nucleolar RNA, C/D box 59B                            |                 | 0,781220279 |
| A_33_P3368193 | NM_001011709    | PNLIPRP3     | pancreatic lipase-related protein 3                         | ENST00000369230 | 0,781099343 |
| A_24_P944588  | NM_033196       | ZNF682       | zinc finger protein 682                                     | ENST00000341262 | 0,7810001   |
| A_32_P45168   | NM_002184       | IL6ST        | interleukin 6 signal transducer (gp130, oncostatin M recept | ENST00000336909 | 0,780770618 |
| A_33_P3216319 | NM_015144       | ZCCHC14      | zinc finger, CCHC domain containing 14                      | ENST00000268616 | 0,780765284 |
| A_21_P0000370 | NR_003036       | SNORD6       | small nucleolar RNA, C/D box 6                              |                 | 0,78063944  |
| A_21_P0002435 | THC2682661      | XLOC_002080  |                                                             |                 | 0,780600922 |
| A_23_P92107   | NM_021082       | SLC15A2      | solute carrier family 15 (H+/peptide transporter), member 2 | ENST00000489711 | 0,78059675  |
| A_21_P0014261 | XR_109038       | LOC100507128 | uncharacterized LOC100507128                                |                 | 0,780551826 |
| A_21_P0000501 | NR_004403       | SNORD97      | small nucleolar RNA, C/D box 97                             | ENST00000530564 | 0,780332013 |
| A_33_P3274618 | NR_029401       | LOC731275    | uncharacterized LOC731275                                   | ENST00000427210 | 0,78025838  |
| A_23_P123108  | ENST00000493453 | AKAP9        | A kinase (PRKA) anchor protein (yotiao) 9                   | ENST00000493453 | 0,780200625 |
| A_21_P0002981 | BX109067        | XLOC_002713  |                                                             |                 | 0,780188409 |
| A_21_P0002958 | ENST00000435419 | XLOC_002643  |                                                             | ENST00000435419 | 0,779863363 |



|                |                 |              |                                                          |                 |             |
|----------------|-----------------|--------------|----------------------------------------------------------|-----------------|-------------|
| A_19_P00321765 | NR_038988       | LOC100287765 |                                                          |                 | 0,77941695  |
| A_21_P0006940  | TCONS_00018395  | XLOC_008678  |                                                          |                 | 0,779378838 |
| A_23_P12343    | NM_000849       | GSTM3        | glutathione S-transferase mu 3 (brain)                   | ENST00000488824 | 0,778900137 |
| A_21_P0013163  | NR_024045       | RAET1K       | retinoic acid early transcript 1K pseudogene             | ENST00000533735 | 0,778754637 |
| A_21_P0014195  | XR_108794       | LOC100506312 | uncharacterized LOC100506312                             |                 | 0,778020869 |
| A_23_P12343    | NM_000849       | GSTM3        | glutathione S-transferase mu 3 (brain)                   | ENST00000488824 | 0,777896292 |
| A_33_P3375762  | NR_040117       | LOC392364    | chromosome 15 open reading frame 2 pseudogene            | ENST00000399186 | 0,777765009 |
| A_23_P46725    | NM_025209       | EPC1         | enhancer of polycomb homolog 1 (Drosophila)              | ENST00000263062 | 0,777740558 |
| A_24_P120109   | NM_198963       | DHX57        | DEAH (Asp-Glu-Ala-Asp/His) box polypeptide 57            | ENST00000355320 | 0,777482018 |
| A_23_P143173   | NM_032214       | SLA2         | Src-like-adaptor 2                                       | ENST00000360672 | 0,777309474 |
| A_33_P3258362  | NM_000517       | HBA2         | hemoglobin, alpha 2                                      | ENST00000482565 | 0,776903215 |
| A_33_P3221343  | NM_173497       | HECTD2       | HECT domain containing 2                                 | ENST00000371681 | 0,776806926 |
| A_33_P3245006  | NM_015533       | DAK          | dihydroxyacetone kinase 2 homolog (S. cerevisiae)        | ENST00000394900 | 0,776291924 |
| A_21_P0000265  | NR_002580       | SNORA3       | small nucleolar RNA, H/ACA box 3                         | ENST00000530585 | 0,776230388 |
| A_21_P0000138  | NM_001197238    | BTN2A2       | butyrophilin, subfamily 2, member A2                     | ENST00000469230 | 0,775821    |
| A_33_P3256532  | NM_032120       | C7orf64      | chromosome 7 open reading frame 64                       | ENST00000450580 | 0,775812745 |
| A_23_P300124   | NM_144775       | SMCR8        | Smith-Magenis syndrome chromosome region, candidate 8    | ENST00000406438 | 0,775639059 |
| A_24_P50818    | NM_001206774    | GTF3C3       | general transcription factor IIIC, polypeptide 3, 102kDa | ENST00000409364 | 0,775595732 |
| A_21_P0000222  | NR_000024       | SNORD46      | small nucleolar RNA, C/D box 46                          |                 | 0,775027906 |
| A_23_P411157   | NM_005430       | WNT1         | wingless-type MMTV integration site family, member 1     |                 | 0,774832078 |
| A_21_P0000577  | NR_029378       | LOC100289511 | uncharacterized LOC100289511                             |                 | 0,774452501 |
| A_33_P3233764  | NM_004690       | LATS1        | LATS, large tumor suppressor, homolog 1 (Drosophila)     | ENST00000392273 | 0,77424625  |
| A_23_P200780   | NM_003243       | TGFBR3       | transforming growth factor, beta receptor III            | ENST00000532540 | 0,77420059  |
| A_23_P395374   | NM_003539       | HIST1H4D     | histone cluster 1, H4d                                   | ENST00000340756 | 0,774155739 |
| A_21_P0000508  | NR_024243       | SNAR-D       | small ILF3/NF90-associated RNA D                         |                 | 0,774085291 |
| A_23_P54447    | NR_026813       | C15orf5      | chromosome 15 open reading frame 5                       |                 | 0,773729368 |
| A_23_P416751   | NM_173530       | ZNF610       | zinc finger protein 610                                  | ENST00000403906 | 0,7736512   |
| A_33_P3843358  | BG944179        | SNORD8       | small nucleolar RNA, C/D box 8                           |                 | 0,773619086 |
| A_21_P0005322  | ENST00000485282 | XLOC_006555  |                                                          | ENST00000485282 | 0,773424777 |

|                |                  |                |                                                           |                 |             |
|----------------|------------------|----------------|-----------------------------------------------------------|-----------------|-------------|
| A_23_P12343    | NM_000849        | GSTM3          | glutathione S-transferase mu 3 (brain)                    | ENST00000488824 | 0,773223356 |
| A_23_P108932   | NR_002229        | RPL23AP32      | ribosomal protein L23a pseudogene 32                      |                 | 0,772803782 |
| A_23_P12343    | NM_000849        | GSTM3          | glutathione S-transferase mu 3 (brain)                    | ENST00000488824 | 0,772741358 |
| A_23_P10025    | NM_006159        | NELL2          | NEL-like 2 (chicken)                                      | ENST00000437801 | 0,772654617 |
| A_23_P160466   | NM_006996        | SLC19A2        | solute carrier family 19 (thiamine transporter), member 2 | ENST00000236137 | 0,772616914 |
| A_33_P3353030  | NM_003353        | UCN            | urocortin                                                 | ENST00000296099 | 0,77256425  |
| A_23_P12343    | NM_000849        | GSTM3          | glutathione S-transferase mu 3 (brain)                    | ENST00000488824 | 0,772448326 |
| A_23_P145024   | NM_000024        | ADRB2          | adrenergic, beta-2-, receptor, surface                    | ENST00000305988 | 0,772272004 |
| A_21_P0002860  | ENST00000465795  | XLOC_003166    |                                                           | ENST00000465795 | 0,771988815 |
| A_24_P194748   | NM_001080485     | ZNF275         | zinc finger protein 275                                   | ENST00000421401 | 0,771764793 |
| A_23_P380724   | NM_021826        | FASTKD5        | FAST kinase domains 5                                     | ENST00000380266 | 0,771564491 |
| A_33_P3397768  | AK024148         | PPP6R2         | protein phosphatase 6, regulatory subunit 2               |                 | 0,771447242 |
| A_33_P3406196  | NM_002262        | KLRD1          | killer cell lectin-like receptor subfamily D, member 1    | ENST00000344825 | 0,771438538 |
| A_24_P264166   | NR_033351        | GOLGA8F        | golgin A8 family, member F                                | ENST00000524859 | 0,771371062 |
| A_23_P10025    | NM_006159        | NELL2          | NEL-like 2 (chicken)                                      | ENST00000437801 | 0,7711826   |
| A_21_P0011441  | TCONS_I2_0000977 | XLOC_I2_005244 |                                                           |                 | 0,770379448 |
| A_33_P3368339  | NM_001045477     | FAM22G         | family with sequence similarity 22, member G              | ENST00000354649 | 0,770350436 |
| A_33_P3329834  | NM_018061        | PRPF38B        | PRP38 pre-mRNA processing factor 38 (yeast) domain cont   | ENST00000370022 | 0,770274648 |
| A_21_P0001493  | TCONS_00001468   | XLOC_000794    |                                                           |                 | 0,770155474 |
| A_23_P212568   | NM_016388        | TRAT1          | T cell receptor associated transmembrane adaptor 1        | ENST00000295756 | 0,769937192 |
| A_21_P0009089  | TCONS_00024777   | XLOC_012052    |                                                           |                 | 0,769432439 |
| A_23_P103361   | NM_005356        | LCK            | lymphocyte-specific protein tyrosine kinase               | ENST00000469765 | 0,769225443 |
| A_23_P12343    | NM_000849        | GSTM3          | glutathione S-transferase mu 3 (brain)                    | ENST00000488824 | 0,769118161 |
| A_33_P3861706  | NM_017762        | MTMR10         | myotubularin related protein 10                           | ENST00000435680 | 0,768584781 |
| A_23_P113462   | NM_017641        | KIF21A         | kinesin family member 21A                                 | ENST00000395670 | 0,767871198 |
| A_23_P12343    | NM_000849        | GSTM3          | glutathione S-transferase mu 3 (brain)                    | ENST00000488824 | 0,767755072 |
| A_24_P12065    | NM_004354        | CCNG2          | cyclin G2                                                 | ENST00000316355 | 0,767639566 |
| A_19_P00322645 | XR_110237        | LOC283588      | uncharacterized LOC283588                                 |                 | 0,76762625  |
| A_23_P111054   | NM_021062        | HIST1H2BB      | histone cluster 1, H2bb                                   | ENST00000357905 | 0,767505426 |

|                |                  |                |                                                             |                 |             |
|----------------|------------------|----------------|-------------------------------------------------------------|-----------------|-------------|
| A_19_P00316000 | NR_015431        | FLJ43663       | uncharacterized LOC378805                                   |                 | 0,767461964 |
| A_21_P0014589  | XR_110415        | LOC100507212   | uncharacterized LOC100507212                                |                 | 0,767383687 |
| A_21_P0010654  | NM_001161334     | HIST2H2BF      | histone cluster 2, H2bf                                     | ENST00000369167 | 0,767246    |
| A_33_P3762918  | NR_039981        | LOC100216546   | uncharacterized LOC100216546                                |                 | 0,767082705 |
| A_33_P3364263  | NM_030915        | LBH            | limb bud and heart development homolog (mouse)              | ENST00000484150 | 0,766935297 |
| A_33_P3326545  | NM_182492        | LRP5L          | low density lipoprotein receptor-related protein 5-like     | ENST00000402785 | 0,766291189 |
| A_23_P105545   | NM_016830        | VAMP1          | vesicle-associated membrane protein 1 (synaptobrevin 1)     | ENST00000535927 | 0,766094978 |
| A_23_P12343    | NM_000849        | GSTM3          | glutathione S-transferase mu 3 (brain)                      | ENST00000488824 | 0,76598406  |
| A_21_P0001717  | CR617576         | XLOC_000647    |                                                             |                 | 0,765952071 |
| A_33_P3366754  | AK126945         | LOC100128670   | uncharacterized LOC100128670                                |                 | 0,765641782 |
| A_23_P12343    | NM_000849        | GSTM3          | glutathione S-transferase mu 3 (brain)                      | ENST00000488824 | 0,765605565 |
| A_33_P3313622  | NR_027350        | MIR17HG        | miR-17-92 cluster host gene (non-protein coding)            |                 | 0,765576032 |
| A_33_P3213374  | NM_006079        | CITED2         | Cbp/p300-interacting transactivator, with Glu/Asp-rich carb | ENST00000392312 | 0,765357809 |
| A_33_P3317103  | NM_001017437     | CCDC157        | coiled-coil domain containing 157                           | ENST00000338306 | 0,765186219 |
| A_23_P332908   | NM_144982        | ZFC3H1         | zinc finger, C3H1-type containing                           | ENST00000548100 | 0,765142269 |
| A_21_P0005394  | BX117012         | XLOC_006144    |                                                             |                 | 0,765083904 |
| A_33_P3378383  | NR_003260        | DNM1P46        | DNM1 pseudogene 46                                          | ENST00000341853 | 0,765044876 |
| A_23_P18993    | NM_152622        | MIER3          | mesoderm induction early response 1, family member 3        | ENST00000452157 | 0,765042207 |
| A_23_P111041   | NM_003525        | HIST1H2BI      | histone cluster 1, H2bi                                     | ENST00000377733 | 0,764940159 |
| A_32_P70724    | NM_006618        | KDM5B          | lysine (K)-specific demethylase 5B                          | ENST00000538292 | 0,76483772  |
| A_33_P3800496  | BX470739         | SNORA46        | small nucleolar RNA, H/ACA box 46                           |                 | 0,764359074 |
| A_24_P187859   | AK095964         | MRPS27         | mitochondrial ribosomal protein S27                         |                 | 0,764317222 |
| A_21_P0012409  | TCONS_I2_0001896 | XLOC_I2_009968 |                                                             |                 | 0,764291541 |
| A_33_P3278764  | BC031959         | LOC100132078   | uncharacterized LOC100132078                                |                 | 0,764223276 |
| A_19_P00321361 | NR_015431        | FLJ43663       | uncharacterized LOC378805                                   |                 | 0,76410541  |
| A_33_P3276250  | AK308704         | TMEM191C       | transmembrane protein 191C                                  |                 | 0,764079293 |
| A_23_P302018   | NM_003328        | TXK            | TXK tyrosine kinase                                         | ENST00000514937 | 0,763809965 |
| A_19_P00318561 | XR_108763        | LOC100506516   | uncharacterized LOC100506516                                | ENST00000414621 | 0,763609388 |
| A_21_P0008206  | TCONS_00022098   | XLOC_010707    |                                                             |                 | 0,763530158 |

|                |                 |                |                                                                |                 |             |
|----------------|-----------------|----------------|----------------------------------------------------------------|-----------------|-------------|
| A_21_P0014601  | ENST00000466213 | SFPQ           | splicing factor proline/glutamine-rich                         | ENST00000466213 | 0,763406041 |
| A_21_P0000579  | NR_029383       | PAN3-AS1       | PAN3 antisense RNA 1 (non-protein coding)                      |                 | 0,763266173 |
| A_21_P0001482  | ENST00000473314 | C1orf63        | chromosome 1 open reading frame 63                             | ENST00000473314 | 0,763245119 |
| A_33_P3401284  | NR_003051       | RMRP           | RNA component of mitochondrial RNA processing endoribonuclease |                 | 0,762518817 |
| A_33_P3376454  | XR_108564       | LOC100133299   | GALI1870                                                       |                 | 0,762138628 |
| A_23_P74467    | NM_014949       | KIAA0907       | KIAA0907                                                       | ENST00000368320 | 0,761395133 |
| A_21_P0014522  | XR_110202       | LOC100506090   | uncharacterized LOC100506090                                   |                 | 0,761324911 |
| A_33_P3223660  | NR_023389       | LINC00476      | long intergenic non-protein coding RNA 476                     |                 | 0,76129079  |
| A_23_P79818    | NM_016470       | C20orf111      | chromosome 20 open reading frame 111                           | ENST00000372970 | 0,760946142 |
| A_23_P125639   | NM_003410       | ZFX            | zinc finger protein, X-linked                                  | ENST00000540034 | 0,760934902 |
| A_33_P3237590  | AK123396        | LOC728178      | uncharacterized LOC728178                                      |                 | 0,760793395 |
| A_23_P12343    | NM_000849       | GSTM3          | glutathione S-transferase mu 3 (brain)                         | ENST00000488824 | 0,760689844 |
| A_33_P3385762  | NM_001005178    | OR52W1         | olfactory receptor, family 52, subfamily W, member 1           | ENST00000311352 | 0,760536091 |
| A_23_P82324    | NM_032415       | CARD11         | caspase recruitment domain family, member 11                   | ENST00000396946 | 0,760256552 |
| A_23_P340019   | NM_178844       | NLRC3          | NLR family, CARD domain containing 3                           | ENST00000419350 | 0,759952994 |
| A_23_P20752    | NM_001039803    | CDK20          | cyclin-dependent kinase 20                                     | ENST00000325303 | 0,759937311 |
| A_23_P74042    | NM_012302       | LPHN2          | latrophilin 2                                                  | ENST00000370725 | 0,759528926 |
| A_19_P00316911 | ENST00000453636 | XLOC_001688    |                                                                | ENST00000453636 | 0,759352307 |
| A_19_P00813192 | ENST00000534659 | XLOC_l2_002761 |                                                                | ENST00000534659 | 0,759314364 |
| A_23_P161076   | NM_001767       | CD2            | CD2 molecule                                                   | ENST00000369478 | 0,759251456 |
| A_21_P0011465  | NM_015092       | SMG1           | smg-1 homolog, phosphatidylinositol 3-kinase-related kinas     | ENST00000447140 | 0,758913751 |
| A_23_P102286   | NM_000233       | LHCGR          | luteinizing hormone/choriogonadotropin receptor                | ENST00000401907 | 0,758714583 |
| A_23_P327156   | NR_024334       | LOC645431      | uncharacterized LOC645431                                      |                 | 0,758569338 |
| A_24_P384569   | NM_001163287    | EWSR1          | Ewing sarcoma breakpoint region 1                              | ENST00000483415 | 0,758426074 |
| A_19_P00321885 | NR_015431       | FLJ43663       | uncharacterized LOC378805                                      |                 | 0,758244348 |
| A_21_P0014093  | XR_108413       | LOC100507039   | uncharacterized LOC100507039                                   |                 | 0,758169747 |
| A_24_P737939   | NM_001012974    | C6orf154       | chromosome 6 open reading frame 154                            | ENST00000468319 | 0,757883778 |
| A_23_P153767   | NM_014371       | AKAP8L         | A kinase (PRKA) anchor protein 8-like                          | ENST00000397410 | 0,756982353 |
| A_21_P0011721  | XR_109580       | LOC100505555   | uncharacterized LOC100505555                                   |                 | 0,756559501 |

|               |                 |              |                                                                 |                 |             |
|---------------|-----------------|--------------|-----------------------------------------------------------------|-----------------|-------------|
| A_33_P3299122 | ENST00000402929 | HNF1A        | HNF1 homeobox A                                                 | ENST00000402929 | 0,756364397 |
| A_21_P0005460 | ENST00000469418 | XLOC_006324  |                                                                 | ENST00000469418 | 0,756127439 |
| A_23_P10025   | NM_006159       | NELL2        | NEL-like 2 (chicken)                                            | ENST00000437801 | 0,755902351 |
| A_21_P0008450 | TCONS_00022773  | XLOC_011057  |                                                                 |                 | 0,755878642 |
| A_23_P167997  | NM_003518       | HIST1H2BG    | histone cluster 1, H2bg                                         | ENST00000244601 | 0,755749885 |
| A_21_P0000630 | NR_034079       | LOC643733    | caspase 4, apoptosis-related cysteine peptidase pseudogen       | ENST00000527637 | 0,755637299 |
| A_23_P22682   | NM_016608       | ARMCX1       | armadillo repeat containing, X-linked 1                         | ENST00000538894 | 0,755203719 |
| A_33_P3304527 | NM_021035       | ZNFX1        | zinc finger, NFX1-type containing 1                             | ENST00000396106 | 0,754908641 |
| A_33_P3353425 | NM_020935       | USP37        | ubiquitin specific peptidase 37                                 | ENST00000478329 | 0,754876615 |
| A_33_P3280875 | NM_006469       | IVNS1ABP     | influenza virus NS1A binding protein                            | ENST00000392007 | 0,754695187 |
| A_23_P325631  | NM_003036       | SKI          | v-ski sarcoma viral oncogene homolog (avian)                    | ENST00000378536 | 0,754636719 |
| A_21_P0000270 | NR_002586       | SNORA63      | small nucleolar RNA, H/ACA box 63                               | ENST00000494445 | 0,75443841  |
| A_21_P0010400 | TCONS_00029538  | XLOC_014188  |                                                                 |                 | 0,754408756 |
| A_33_P3381361 | ENST00000312632 | SPG7         | spastic paraplegia 7 (pure and complicated autosomal recessive) | ENST00000312632 | 0,754194862 |
| A_24_P375205  | ENST00000389126 | MKL2         | MKL/myocardin-like 2                                            | ENST00000389126 | 0,753649243 |
| A_23_P101623  | NM_022103       | ZNF667       | zinc finger protein 667                                         | ENST00000360227 | 0,753330388 |
| A_23_P86386   | NM_024804       | ZNF669       | zinc finger protein 669                                         | ENST00000535105 | 0,753165704 |
| A_33_P3316928 | NM_020651       | PELI1        | pellino homolog 1 (Drosophila)                                  | ENST00000358912 | 0,753006937 |
| A_32_P115050  | NR_037595       | LOC646576    | uncharacterized LOC646576                                       |                 | 0,752861658 |
| A_21_P0014219 | XR_108902       | LOC100507204 | uncharacterized LOC100507204                                    |                 | 0,752839687 |
| A_21_P0000507 | NR_024230       | SNAR-B2      | small ILF3/NF90-associated RNA B2                               |                 | 0,75283617  |
| A_21_P0010495 | NR_038958       | LOC100507412 | uncharacterized LOC100507412                                    |                 | 0,752414929 |
| A_23_P109913  | NM_006564       | CXCR6        | chemokine (C-X-C motif) receptor 6                              | ENST00000438735 | 0,75216651  |
| A_33_P3355926 | NR_034083       | LOC100130894 | uncharacterized LOC100130894                                    | ENST00000398177 | 0,752149221 |
| A_23_P139558  | NM_022771       | TBC1D15      | TBC1 domain family, member 15                                   | ENST00000546450 | 0,752061226 |
| A_33_P3288431 | NM_152589       | C12orf50     | chromosome 12 open reading frame 50                             | ENST00000551163 | 0,751606015 |
| A_23_P46396   | NM_021190       | PTBP2        | polypyrimidine tract binding protein 2                          | ENST00000394176 | 0,751437928 |
| A_23_P167882  | NM_052872       | IL17F        | interleukin 17F                                                 | ENST00000478427 | 0,750634495 |
| A_32_P206479  | NM_178457       | ZNF831       | zinc finger protein 831                                         | ENST00000371030 | 0,750568991 |



|                |                 |              |                                                       |                 |             |
|----------------|-----------------|--------------|-------------------------------------------------------|-----------------|-------------|
| A_23_P250874   | NM_003602       | FKBP6        | FK506 binding protein 6, 36kDa                        | ENST00000431982 | 0,750498231 |
| A_33_P3320010  | NM_006089       | SCML2        | sex comb on midleg-like 2 (Drosophila)                | ENST00000491988 | 0,750354135 |
| A_23_P103361   | NM_005356       | LCK          | lymphocyte-specific protein tyrosine kinase           | ENST00000469765 | 0,750329677 |
| A_23_P126844   | NM_148965       | TNFRSF25     | tumor necrosis factor receptor superfamily, member 25 | ENST00000513135 | 0,749901837 |
| A_23_P59045    | NM_021052       | HIST1H2AE    | histone cluster 1, H2ae                               | ENST00000303910 | 0,749756233 |
| A_23_P85188    | NM_022838       | ARMCX5       | armadillo repeat containing, X-linked 5               | ENST00000372742 | 0,749583979 |
| A_33_P3353979  | NM_181519       | SYT15        | synaptotagmin XV                                      | ENST00000374330 | 0,749578394 |
| A_21_P0008921  | TCONS_00024367  | XLOC_011691  |                                                       |                 | 0,748908867 |
| A_33_P3404676  | ENST00000371958 | AMOT         | angiomin                                              | ENST00000371958 | 0,748655696 |
| A_21_P0002132  | ENST00000443261 | XLOC_002449  |                                                       | ENST00000443261 | 0,748387499 |
| A_23_P110699   | NM_052860       | ZNF300       | zinc finger protein 300                               | ENST00000394226 | 0,748285259 |
| A_23_P117261   | NM_130806       | RXFP2        | relaxin/insulin-like family peptide receptor 2        | ENST00000298386 | 0,747718197 |
| A_24_P7790     | NM_172006       | WFDC10B      | WAP four-disulfide core domain 10B                    | ENST00000330523 | 0,747283353 |
| A_23_P53193    | NM_206927       | SYTL2        | synaptotagmin-like 2                                  | ENST00000525692 | 0,746916305 |
| A_33_P3405459  | NM_024059       | C20orf195    | chromosome 20 open reading frame 195                  | ENST00000370098 | 0,746631019 |
| A_33_P3219010  | ENST00000505713 | PPA2         | pyrophosphatase (inorganic) 2                         | ENST00000505713 | 0,746542617 |
| A_21_P0014071  | XR_108345       | LOC100132909 | uncharacterized LOC100132909                          |                 | 0,746514411 |
| A_23_P417891   | NM_145735       | ARHGEF7      | Rho guanine nucleotide exchange factor (GEF) 7        | ENST00000375741 | 0,746317183 |
| A_21_P0001655  | TCONS_00001909  | XLOC_000008  |                                                       |                 | 0,746175982 |
| A_21_P0000244  | NR_002440       | SNORD16      | small nucleolar RNA, C/D box 16                       |                 | 0,74598449  |
| A_23_P142407   | NM_033204       | ZNF101       | zinc finger protein 101                               | ENST00000444249 | 0,745889017 |
| A_23_P110699   | NM_052860       | ZNF300       | zinc finger protein 300                               | ENST00000394226 | 0,745623944 |
| A_33_P3318611  | AK128825        | LOC100131907 | uncharacterized LOC100131907                          |                 | 0,744975553 |
| A_21_P0014102  | XR_108434       | LOC643072    | uncharacterized LOC643072                             |                 | 0,744755543 |
| A_23_P350689   | NM_173570       | ZDHHC23      | zinc finger, DHHC-type containing 23                  | ENST00000478793 | 0,744729959 |
| A_23_P110699   | NM_052860       | ZNF300       | zinc finger protein 300                               | ENST00000394226 | 0,74432738  |
| A_19_P00322743 | XR_110481       | LOC100506029 | uncharacterized LOC100506029                          |                 | 0,744112924 |
| A_33_P3416009  | AK001274        | DONSON       | downstream neighbor of SON                            | ENST00000303113 | 0,744080449 |
| A_21_P0000337  | NR_002983       | SNORA55      | small nucleolar RNA, H/ACA box 55                     |                 | 0,743931768 |

|                |                 |                |                                                      |                 |             |
|----------------|-----------------|----------------|------------------------------------------------------|-----------------|-------------|
| A_21_P0013793  | NM_014675       | CROCC          | ciliary rootlet coiled-coil, rootletin               | ENST00000467715 | 0,74388049  |
| A_19_P00315791 | NR_034007       | LOC339894      | uncharacterized LOC339894                            | ENST00000471357 | 0,743488782 |
| A_33_P3304754  | ENST00000490010 | TPP2           | tripeptidyl peptidase II                             | ENST00000490010 | 0,743369089 |
| A_21_P0000227  | NR_001285       | SNORD35B       | small nucleolar RNA, C/D box 35B                     |                 | 0,743266766 |
| A_33_P3285145  | XR_109830       | LOC100131826   | TSSP3028                                             |                 | 0,743070368 |
| A_23_P207774   | NM_014238       | KSR1           | kinase suppressor of ras 1                           | ENST00000398982 | 0,741794421 |
| A_23_P29257    | NM_005318       | H1F0           | H1 histone family, member 0                          | ENST00000340857 | 0,741561719 |
| A_23_P216038   | NM_032205       | PHF20L1        | PHD finger protein 20-like 1                         | ENST00000315808 | 0,741186452 |
| A_21_P0004514  | TCONS_00010726  | XLOC_004448    |                                                      |                 | 0,741151194 |
| A_23_P162171   | NM_006500       | MCAM           | melanoma cell adhesion molecule                      | ENST00000527913 | 0,741015464 |
| A_21_P0001617  | TCONS_00001800  | XLOC_001189    |                                                      |                 | 0,74099768  |
| A_23_P134204   | NM_032599       | FAM71F1        | family with sequence similarity 71, member F1        | ENST00000484425 | 0,740809301 |
| A_21_P0014563  | XR_110312       | LOC100505675   | uncharacterized LOC100505675                         |                 | 0,740792613 |
| A_21_P0011282  | AY338954        | XLOC_I2_004342 |                                                      |                 | 0,740595469 |
| A_21_P0006386  | TCONS_00016844  | XLOC_007801    |                                                      |                 | 0,740511389 |
| A_23_P127394   | NM_021117       | CRY2           | cryptochrome 2 (photolyase-like)                     | ENST00000443527 | 0,740408959 |
| A_19_P00812151 | NR_024448       | GUSBP11        |                                                      | ENST00000451919 | 0,740127312 |
| A_33_P3222501  | NM_001145248    | FAM157A        | family with sequence similarity 157, member A        | ENST00000480075 | 0,740090771 |
| A_33_P3250148  | NM_198956       | SP8            | Sp8 transcription factor                             | ENST00000297210 | 0,739685199 |
| A_23_P106371   | NM_001038640    | GOLGA6A        | golgin A6 family, member A                           | ENST00000290438 | 0,739481527 |
| A_33_P3390713  | ENST00000377043 | TMEM2          | transmembrane protein 2                              | ENST00000377043 | 0,739453017 |
| A_21_P0010437  | TCONS_00029688  | XLOC_014356    |                                                      |                 | 0,739185799 |
| A_24_P237175   | NM_001322       | CST2           | cystatin SA                                          | ENST00000304725 | 0,738780679 |
| A_21_P0014846  | ENST00000546112 | LOC100288831   |                                                      | ENST00000546112 | 0,738574956 |
| A_23_P131348   | NM_025264       | THUMPD2        | THUMP domain containing 2                            | ENST00000530095 | 0,737949957 |
| A_33_P3251347  | ENST00000378928 | TAB3           | TGF-beta activated kinase 1/MAP3K7 binding protein 3 | ENST00000378928 | 0,73789641  |
| A_19_P00802417 | THC2648133      | P39195         |                                                      |                 | 0,737782672 |
| A_33_P3243332  | NM_152432       | ARHGAP42       | Rho GTPase activating protein 42                     | ENST00000529535 | 0,737710283 |
| A_33_P3229067  | NM_003520       | HIST1H2BN      | histone cluster 1, H2bn                              | ENST00000396980 | 0,737533142 |

|                |                 |              |                                                                 |                 |             |
|----------------|-----------------|--------------|-----------------------------------------------------------------|-----------------|-------------|
| A_19_P00321886 | NR_015431       | FLJ43663     | uncharacterized LOC378805                                       |                 | 0,737440668 |
| A_33_P3307820  | NM_001013623    | C6orf94      | chromosome 6 open reading frame 94                              | ENST00000539295 | 0,73720827  |
| A_19_P00318261 | NR_003016       | SNORA26      |                                                                 |                 | 0,737167217 |
| A_21_P0002570  | TCONS_00004689  | XLOC_001331  |                                                                 |                 | 0,737161656 |
| A_23_P72737    | NM_003641       | IFITM1       | interferon induced transmembrane protein 1 (9-27)               | ENST00000452428 | 0,736854344 |
| A_21_P0002307  | TCONS_00003921  | XLOC_001726  |                                                                 |                 | 0,736539566 |
| A_21_P0009400  | THC2706904      | XLOC_012359  |                                                                 |                 | 0,736369338 |
| A_23_P324989   | ENST00000420326 | RECQL5       | RecQ protein-like 5                                             | ENST00000420326 | 0,736196151 |
| A_23_P359636   | NM_144695       | BROX         | BRO1 domain and CAAX motif containing                           | ENST00000539697 | 0,735961848 |
| A_23_P107693   | NM_017652       | ZNF586       | zinc finger protein 586                                         | ENST00000449441 | 0,735805274 |
| A_24_P278172   | NM_006007       | ZFAND5       | zinc finger, AN1-type domain 5                                  | ENST00000487330 | 0,735765951 |
| A_24_P359030   | NR_024233       | LINC00167    | long intergenic non-protein coding RNA 167                      |                 | 0,735343332 |
| A_33_P3335984  | BC132927        | FLJ39653     | uncharacterized FLJ39653                                        |                 | 0,735235378 |
| A_21_P0004832  | TCONS_00011686  | XLOC_005163  |                                                                 |                 | 0,734956054 |
| A_33_P3244478  | NR_028389       | LOC100128640 | uncharacterized LOC100128640                                    |                 | 0,734934345 |
| A_23_P91943    | NM_000882       | IL12A        | interleukin 12A (natural killer cell stimulatory factor 1, cyto | ENST00000496308 | 0,734729962 |
| A_33_P3305243  | ENST00000373903 | PSMD5        | proteasome (prosome, macropain) 26S subunit, non-ATPase         | ENST00000373903 | 0,734638647 |
| A_33_P3649472  | NR_027078       | LOC283856    | uncharacterized LOC283856                                       |                 | 0,734525517 |
| A_33_P3385870  | NM_004354       | CCNG2        | cyclin G2                                                       | ENST00000316355 | 0,734400155 |
| A_24_P169896   | NM_001243541    | LOC100653515 | differential display clone 8                                    | ENST00000475198 | 0,734123743 |
| A_23_P126727   | NM_024654       | NOL9         | nucleolar protein 9                                             | ENST00000377705 | 0,734112878 |
| A_23_P145024   | NM_000024       | ADRB2        | adrenergic, beta-2-, receptor, surface                          | ENST00000305988 | 0,734053762 |
| A_23_P40657    | NM_014291       | GCAT         | glycine C-acetyltransferase                                     | ENST00000394944 | 0,733942442 |
| A_23_P145024   | NM_000024       | ADRB2        | adrenergic, beta-2-, receptor, surface                          | ENST00000305988 | 0,733523328 |
| A_24_P277934   | NM_000089       | COL1A2       | collagen, type I, alpha 2                                       | ENST00000464916 | 0,733520846 |
| A_21_P0001374  | ENST00000464336 | NBPF15       | neuroblastoma breakpoint family, member 15                      | ENST00000464336 | 0,733506264 |
| A_21_P0000285  | NR_002744       | SNORD49A     | small nucleolar RNA, C/D box 49A                                |                 | 0,733222133 |
| A_21_P0011288  | NM_012102       | RERE         | arginine-glutamic acid dipeptide (RE) repeats                   | ENST00000480342 | 0,733069028 |
| A_33_P3403937  | AK124011        | LOC100129399 | uncharacterized LOC100129399                                    |                 | 0,732897469 |

|               |                  |                |                                                               |                 |             |
|---------------|------------------|----------------|---------------------------------------------------------------|-----------------|-------------|
| A_33_P3263392 | AK126149         | LOC729696      | uncharacterized LOC729696                                     |                 | 0,732803049 |
| A_33_P3228977 | ENST00000382893  | UTY            | ubiquitously transcribed tetratricopeptide repeat gene, Y-lir | ENST00000382893 | 0,732679042 |
| A_33_P3423590 | AK126260         | LOC100129275   | uncharacterized LOC100129275                                  |                 | 0,732671567 |
| A_33_P3345623 | NM_001003700     | RREB1          | ras responsive element binding protein 1                      | ENST00000334984 | 0,732533743 |
| A_23_P110699  | NM_052860        | ZNF300         | zinc finger protein 300                                       | ENST00000394226 | 0,732097757 |
| A_33_P3250680 | NM_000074        | CD40LG         | CD40 ligand                                                   | ENST00000370629 | 0,731890778 |
| A_21_P0001945 | ENST00000424655  | XLOC_001776    |                                                               | ENST00000424655 | 0,731668325 |
| A_23_P6066    | NM_019609        | CPXM1          | carboxypeptidase X (M14 family), member 1                     | ENST00000421947 | 0,731639686 |
| A_23_P13033   | NM_002896        | RBM4           | RNA binding motif protein 4                                   | ENST00000408993 | 0,731494693 |
| A_33_P3363082 | NR_003008        | SCARNA5        | small Cajal body-specific RNA 5                               |                 | 0,731194079 |
| A_23_P34676   | NM_198053        | CD247          | CD247 molecule                                                | ENST00000483825 | 0,731062862 |
| A_21_P0000358 | NR_003017        | SNORA71C       | small nucleolar RNA, H/ACA box 71C                            |                 | 0,730678388 |
| A_24_P923757  | NM_018179        | ATF7IP         | activating transcription factor 7 interacting protein         | ENST00000396279 | 0,730667687 |
| A_24_P170774  | NM_015116        | LRCH1          | leucine-rich repeats and calponin homology (CH) domain cc     | ENST00000389798 | 0,730427393 |
| A_21_P0012255 | TCONS_I2_0001763 | XLOC_I2_009316 |                                                               |                 | 0,730299702 |
| A_33_P3423941 | NM_003641        | IFITM1         | interferon induced transmembrane protein 1 (9-27)             | ENST00000408968 | 0,730113628 |
| A_21_P0008992 | TCONS_00024502   | XLOC_011821    |                                                               |                 | 0,729784269 |
| A_32_P88719   | NM_001031834     | RAB40AL        | RAB40A, member RAS oncogene family-like                       | ENST00000218249 | 0,729667056 |
| A_21_P0000322 | NR_002968        | SNORA34        | small nucleolar RNA, H/ACA box 34                             |                 | 0,729583503 |
| A_23_P336198  | NM_138426        | GLCCI1         | glucocorticoid induced transcript 1                           | ENST00000482540 | 0,729221543 |
| A_33_P3233995 | ENST00000330955  | BAALC          | brain and acute leukemia, cytoplasmic                         | ENST00000330955 | 0,729123253 |
| A_32_P182473  | NM_145233        | ZNF625         | zinc finger protein 625                                       | ENST00000439556 | 0,728674697 |
| A_23_P107693  | NM_017652        | ZNF586         | zinc finger protein 586                                       | ENST00000449441 | 0,728557053 |
| A_33_P3369550 | NM_004768        | SRSF11         | serine/arginine-rich splicing factor 11                       | ENST00000405432 | 0,728487714 |
| A_23_P30972   | NM_022091        | ASCC3          | activating signal cointegrator 1 complex subunit 3            | ENST00000324723 | 0,728460429 |
| A_23_P408167  | NM_001004051     | GPRASP2        | G protein-coupled receptor associated sorting protein 2       | ENST00000332262 | 0,728206634 |
| A_33_P3217534 | NM_053043        | RBM33          | RNA binding motif protein 33                                  | ENST00000401878 | 0,728006232 |
| A_21_P0013865 | ENST00000422194  | XLOC_I2_015752 |                                                               | ENST00000422194 | 0,727654294 |
| A_23_P10025   | NM_006159        | NELL2          | NEL-like 2 (chicken)                                          | ENST00000437801 | 0,727359286 |

|                |                   |                |                                                             |                 |             |
|----------------|-------------------|----------------|-------------------------------------------------------------|-----------------|-------------|
| A_33_P3297651  | AK125068          | LOC100130540   | uncharacterized LOC100130540                                |                 | 0,727223112 |
| A_23_P78802    | NM_016457         | PRKD2          | protein kinase D2                                           | ENST00000291281 | 0,727022043 |
| A_33_P3659678  | ENST00000487099   | NR6A1          | nuclear receptor subfamily 6, group A, member 1             | ENST00000487099 | 0,726932499 |
| A_19_P00322573 | ENST00000430244   | Q9UJ41         |                                                             | ENST00000430244 | 0,726551828 |
| A_23_P31798    | NM_000015         | NAT2           | N-acetyltransferase 2 (arylamine N-acetyltransferase)       | ENST00000286479 | 0,726491773 |
| A_21_P0002797  | ENST00000494887   | XLOC_002909    |                                                             | ENST00000494887 | 0,726448296 |
| A_23_P4850     | NM_145233         | ZNF625         | zinc finger protein 625                                     | ENST00000439556 | 0,726323744 |
| A_33_P3212909  | NM_033400         | ZFHX2          | zinc finger homeobox 2                                      | ENST00000382785 | 0,72630212  |
| A_23_P148600   | NR_024616         | INE1           | inactivation escape 1 (non-protein coding)                  | ENST00000456273 | 0,725615032 |
| A_21_P0004598  | BX647715          | XLOC_005299    |                                                             |                 | 0,725237054 |
| A_21_P0004978  | TCONS_00012029    | XLOC_005561    |                                                             |                 | 0,72518073  |
| A_23_P128246   | NM_007076         | FICD           | FIC domain containing                                       | ENST00000552695 | 0,725078278 |
| A_23_P10025    | NM_006159         | NELL2          | NEL-like 2 (chicken)                                        | ENST00000437801 | 0,725068763 |
| A_33_P3665553  | AK126241          | LOC100233156   | tektin 4 pseudogene                                         |                 | 0,725043325 |
| A_23_P109913   | NM_006564         | CXCR6          | chemokine (C-X-C motif) receptor 6                          | ENST00000438735 | 0,724491874 |
| A_33_P3210904  | AK095629          | SEC13          | SEC13 homolog (S. cerevisiae)                               | ENST00000397101 | 0,723589856 |
| A_23_P373927   | NM_015051         | ERP44          | endoplasmic reticulum protein 44                            | ENST00000262455 | 0,723473281 |
| A_23_P502470   | NM_002184         | IL6ST          | interleukin 6 signal transducer (gp130, oncostatin M recept | ENST00000336909 | 0,723064837 |
| A_23_P104109   | NM_012424         | RPS6KC1        | ribosomal protein S6 kinase, 52kDa, polypeptide 1           | ENST00000366960 | 0,722916053 |
| A_33_P3587376  | NR_024214         | SNAR-A3        | small ILF3/NF90-associated RNA A3                           |                 | 0,722677067 |
| A_24_P247902   | NM_014510         | PCLO           | piccolo (presynaptic cytomatrix protein)                    | ENST00000380195 | 0,722629869 |
| A_21_P0000333  | NR_002978         | SNORA46        | small nucleolar RNA, H/ACA box 46                           |                 | 0,722444641 |
| A_23_P344281   | NM_001010879      | ZIK1           | zinc finger protein interacting with K protein 1 homolog (m | ENST00000307468 | 0,722216121 |
| A_23_P103361   | NM_005356         | LCK            | lymphocyte-specific protein tyrosine kinase                 | ENST00000469765 | 0,721967641 |
| A_33_P3538279  | AF130079          | PRO2852        | uncharacterized protein PRO2852                             |                 | 0,72176133  |
| A_21_P0013746  | TCONS_I2_00030111 | XLOC_I2_015438 |                                                             |                 | 0,721685662 |
| A_23_P346421   | NM_018181         | ZNF532         | zinc finger protein 532                                     | ENST00000336078 | 0,721544755 |
| A_24_P68019    | NM_138347         | ZNF551         | zinc finger protein 551                                     | ENST00000282296 | 0,721058531 |
| A_21_P0005566  | TCONS_00014160    | XLOC_006138    |                                                             |                 | 0,720811305 |



|               |                   |                |                                                            |                  |             |
|---------------|-------------------|----------------|------------------------------------------------------------|------------------|-------------|
| A_21_P0004355 | NR_033898         | LOC285577      | uncharacterized LOC285577                                  | ENST00000505443  | 0,720740602 |
| A_23_P255076  | NM_033411         | RWDD2A         | RWD domain containing 2A                                   | ENST00000369724  | 0,720730084 |
| A_23_P404667  | NM_001197         | BIK            | BCL2-interacting killer (apoptosis-inducing)               | ENST00000216115  | 0,720492391 |
| A_33_P3420841 | ENST00000402116   | EIF3D          | eukaryotic translation initiation factor 3, subunit D      | ENST00000402116  | 0,720208038 |
| A_21_P0004174 | ENST00000515364   | XLOC_004966    |                                                            | ENST00000515364  | 0,719969034 |
| A_23_P435477  | NM_001077263      | TMPRSS13       | transmembrane protease, serine 13                          | ENST00000336500  | 0,719950542 |
| A_33_P3293353 | NM_016121         | KCTD3          | potassium channel tetramerisation domain containing 3      | ENST000003366945 | 0,719910572 |
| A_21_P0010943 | ENST00000440803   | XLOC_I2_001952 |                                                            | ENST00000440803  | 0,719513951 |
| A_33_P3355743 | NM_018040         | GPATCH2        | G patch domain containing 2                                | ENST000003366934 | 0,719455466 |
| A_33_P3358893 | NM_002762         | PRM2           | protamine 2                                                | ENST00000241808  | 0,719294147 |
| A_23_P133536  | NM_144647         | CAPSL          | calcyphosine-like                                          | ENST00000513623  | 0,71882316  |
| A_23_P101811  | NM_021030         | ZNF14          | zinc finger protein 14                                     | ENST00000344099  | 0,718610753 |
| A_23_P117602  | NM_004131         | GZMB           | granzyme B (granzyme 2, cytotoxic T-lymphocyte-associated  | ENST00000554242  | 0,71843701  |
| A_32_P505133  | NM_178830         | C19orf47       | chromosome 19 open reading frame 47                        | ENST00000392035  | 0,718383785 |
| A_24_P247732  | NM_021095         | SLC5A6         | solute carrier family 5 (sodium-dependent vitamin transpor | ENST00000442731  | 0,718213277 |
| A_21_P0014445 | ENST00000500800   | SMARCA5-AS1    |                                                            | ENST00000500800  | 0,718193577 |
| A_21_P0003480 | ENST00000510744   | XLOC_003988    |                                                            | ENST00000510744  | 0,717742343 |
| A_23_P114307  | NM_002565         | P2RY4          | pyrimidinergic receptor P2Y, G-protein coupled, 4          | ENST00000374519  | 0,717707027 |
| A_23_P50517   | NM_001101419      | ZNF541         | zinc finger protein 541                                    | ENST00000314121  | 0,71763763  |
| A_23_P145024  | NM_000024         | ADRB2          | adrenergic, beta-2-, receptor, surface                     | ENST00000305988  | 0,717532273 |
| A_33_P3376806 | NM_153714         | C10orf67       | chromosome 10 open reading frame 67                        | ENST00000323327  | 0,717514194 |
| A_21_P0008476 | BU568198          | XLOC_011103    |                                                            |                  | 0,717443751 |
| A_23_P91850   | NM_144717         | IL20RB         | interleukin 20 receptor beta                               | ENST00000475972  | 0,717201777 |
| A_23_P104109  | NM_012424         | RPS6KC1        | ribosomal protein S6 kinase, 52kDa, polypeptide 1          | ENST000003366960 | 0,717167787 |
| A_21_P0011143 | TCONS_I2_0000685: | XLOC_I2_003732 |                                                            |                  | 0,717101944 |
| A_24_P627984  | NM_014805         | EPM2AIP1       | EPM2A (laforin) interacting protein 1                      | ENST00000322716  | 0,716873776 |
| A_33_P3264379 | NR_027049         | ZNF788         | zinc finger family member 788                              | ENST00000397759  | 0,716718452 |
| A_23_P107693  | NM_017652         | ZNF586         | zinc finger protein 586                                    | ENST00000449441  | 0,716548231 |
| A_23_P160689  | NM_018372         | LRIF1          | ligand dependent nuclear receptor interacting factor 1     | ENST00000485275  | 0,716466047 |

|               |                 |                |                                                               |                 |             |
|---------------|-----------------|----------------|---------------------------------------------------------------|-----------------|-------------|
| A_23_P365738  | NM_015193       | ARC            | activity-regulated cytoskeleton-associated protein            | ENST00000356613 | 0,716425625 |
| A_23_P109913  | NM_006564       | CXCR6          | chemokine (C-X-C motif) receptor 6                            | ENST00000438735 | 0,71640637  |
| A_21_P0009345 | AK094767        | FLJ37448       | uncharacterized LOC400612                                     |                 | 0,716183525 |
| A_23_P126584  | NM_005894       | CD5L           | CD5 molecule-like                                             | ENST00000368174 | 0,716178542 |
| A_33_P3259878 | ENST00000545894 | DDB1           | damage-specific DNA binding protein 1, 127kDa                 | ENST00000545894 | 0,71603353  |
| A_33_P3251771 | NM_015247       | CYLD           | cylindromatosis (turban tumor syndrome)                       | ENST00000311559 | 0,715904427 |
| A_33_P3325262 | NM_005629       | SLC6A8         | solute carrier family 6 (neurotransmitter transporter, creati | ENST00000359871 | 0,715903748 |
| A_21_P0008494 | TCONS_00022884  | XLOC_011138    |                                                               |                 | 0,715733456 |
| A_23_P215549  | NM_000940       | PON3           | paraoxonase 3                                                 | ENST00000460248 | 0,715537216 |
| A_24_P935782  | NM_001008727    | ZNF121         | zinc finger protein 121                                       | ENST00000538300 | 0,715503689 |
| A_23_P128956  | NM_021260       | ZFYVE1         | zinc finger, FYVE domain containing 1                         | ENST00000556143 | 0,715294983 |
| A_24_P202329  | NR_026899       | LOC146880      | Rho GTPase activating protein 27 pseudogene                   | ENST00000400873 | 0,715010494 |
| A_21_P0013400 | ENST00000440208 | XLOC_l2_013554 |                                                               | ENST00000440208 | 0,714848456 |
| A_24_P37887   | NM_199243       | GPR150         | G protein-coupled receptor 150                                | ENST00000380007 | 0,714571186 |
| A_23_P376686  | NM_019602       | BTNL2          | butyrophilin-like 2 (MHC class II associated)                 | ENST00000374993 | 0,714532657 |
| A_23_P104109  | NM_012424       | RPS6KC1        | ribosomal protein S6 kinase, 52kDa, polypeptide 1             | ENST00000366960 | 0,714440365 |
| A_33_P3228757 | NM_001144989    | ZNF814         | zinc finger protein 814                                       | ENST00000376205 | 0,714204667 |
| A_21_P0005309 | ENST00000412800 | XLOC_006446    |                                                               | ENST00000412800 | 0,713978508 |
| A_24_P223384  | NM_003513       | HIST1H2AB      | histone cluster 1, H2ab                                       | ENST00000259791 | 0,713926475 |
| A_23_P110699  | NM_052860       | ZNF300         | zinc finger protein 300                                       | ENST00000394226 | 0,713272254 |
| A_33_P3219870 | NM_020376       | PNPLA2         | patatin-like phospholipase domain containing 2                | ENST00000529255 | 0,713056851 |
| A_33_P3243399 | ENST00000467901 | SLMAP          | sarcolemma associated protein                                 | ENST00000467901 | 0,7129298   |
| A_21_P0001139 | AK128720        | PKP4           | plakophilin 4                                                 | ENST00000448344 | 0,712479228 |
| A_33_P3248325 | NM_001184938    | EPB41L5        | erythrocyte membrane protein band 4.1 like 5                  | ENST00000331393 | 0,712469677 |
| A_23_P107693  | NM_017652       | ZNF586         | zinc finger protein 586                                       | ENST00000449441 | 0,712219501 |
| A_23_P117851  | NM_001030005    | CPLX3          | complexin 3                                                   | ENST00000488000 | 0,712134751 |
| A_24_P307135  | NM_019105       | TNXB           | tenascin XB                                                   | ENST00000383159 | 0,712099306 |
| A_23_P138805  | NM_012124       | CHORDC1        | cysteine and histidine-rich domain (CHORD) containing 1       | ENST00000533724 | 0,712051006 |
| A_33_P3263417 | NR_015431       | FLJ43663       | uncharacterized LOC378805                                     |                 | 0,711948504 |

|                |                 |                |                                                           |                 |             |
|----------------|-----------------|----------------|-----------------------------------------------------------|-----------------|-------------|
| A_21_P0000621  | NR_034008       | LOC100498859   | uncharacterized LOC100498859                              | ENST00000471719 | 0,711818788 |
| A_33_P3416882  | NM_206919       | ARL9           | ADP-ribosylation factor-like 9                            | ENST00000360096 | 0,711782931 |
| A_33_P3265479  | ENST00000522974 | ZFAT           | zinc finger and AT hook domain containing                 | ENST00000522974 | 0,711702241 |
| A_23_P24044    | NM_017649       | CNNM2          | cyclin M2                                                 | ENST00000433628 | 0,711640918 |
| A_32_P109522   | NM_145062       | ZUFSP          | zinc finger with UFM1-specific peptidase domain           | ENST00000368576 | 0,711434699 |
| A_33_P3427239  | BC035129        | LOC100134937   | uncharacterized LOC100134937                              |                 | 0,711164577 |
| A_21_P0013963  | XM_003118619    | LOC100507445   | uncharacterized protein LOC100507445                      |                 | 0,711118827 |
| A_33_P3259662  | NM_003435       | ZNF134         | zinc finger protein 134                                   | ENST00000396161 | 0,709832282 |
| A_23_P107693   | NM_017652       | ZNF586         | zinc finger protein 586                                   | ENST00000449441 | 0,709751777 |
| A_21_P0010950  | THC2554014      | XLOC_I2_002033 |                                                           |                 | 0,709440246 |
| A_21_P0010252  | TCONS_00029029  | XLOC_013950    |                                                           |                 | 0,709409551 |
| A_21_P0012903  | NM_012141       | INTS6          | integrator complex subunit 6                              | ENST00000463928 | 0,709139912 |
| A_24_P282416   | NM_007313       | ABL1           | c-abl oncogene 1, non-receptor tyrosine kinase            | ENST00000393293 | 0,709045375 |
| A_23_P10206    | NM_005328       | HAS2           | hyaluronan synthase 2                                     | ENST00000303924 | 0,708987457 |
| A_21_P0008925  | TCONS_00024377  | XLOC_011701    |                                                           |                 | 0,708901818 |
| A_21_P0000281  | NR_002737       | SNORD59A       | small nucleolar RNA, C/D box 59A                          |                 | 0,708716463 |
| A_23_P145024   | NM_000024       | ADRB2          | adrenergic, beta-2-, receptor, surface                    | ENST00000305988 | 0,708673245 |
| A_33_P3308497  | NR_026592       | BMS1P4         | BMS1 pseudogene 4                                         | ENST00000399449 | 0,708308778 |
| A_21_P0000512  | NR_024343       | SNAR-I         | small ILF3/NF90-associated RNA I                          |                 | 0,708106339 |
| A_21_P0014323  | XR_109285       | LOC100507092   | uncharacterized LOC100507092                              |                 | 0,707969028 |
| A_33_P3288995  | ENST00000396653 | AP1S3          | adaptor-related protein complex 1, sigma 3 subunit        | ENST00000396653 | 0,707832719 |
| A_33_P3865368  | BC021569        | LOC254896      | uncharacterized LOC254896                                 | ENST00000397703 | 0,707817087 |
| A_21_P0006998  | TCONS_00018521  | XLOC_008828    |                                                           |                 | 0,707677344 |
| A_23_P81248    | NM_005642       | TAF7           | TAF7 RNA polymerase II, TATA box binding protein (TBP)-as | ENST00000313368 | 0,707623968 |
| A_21_P0010675  | NR_029401       | LOC731275      | uncharacterized LOC731275                                 | ENST00000427210 | 0,707277922 |
| A_33_P3369419  | NM_032292       | GON4L          | gon-4-like (C. elegans)                                   | ENST00000368327 | 0,706993296 |
| A_19_P00812257 | NR_034128       | LOC440900      | uncharacterized LOC440900                                 | ENST00000412690 | 0,70697454  |
| A_33_P3354404  | NM_181684       | KRTAP12-2      | keratin associated protein 12-2                           | ENST00000539483 | 0,706926351 |
| A_23_P10025    | NM_006159       | NELL2          | NEL-like 2 (chicken)                                      | ENST00000437801 | 0,706564129 |

|                |                  |                |                                                             |                 |             |
|----------------|------------------|----------------|-------------------------------------------------------------|-----------------|-------------|
| A_24_P134319   | ENST00000349014  | ADNP           | activity-dependent neuroprotector homeobox                  | ENST00000349014 | 0,706492776 |
| A_33_P3394040  | NM_022374        | ATL2           | atlastin GTPase 2                                           | ENST00000405384 | 0,706326488 |
| A_32_P424761   | ENST00000299350  | C12orf28       | chromosome 12 open reading frame 28                         | ENST00000299350 | 0,706319471 |
| A_33_P3221960  | NM_003853        | IL18RAP        | interleukin 18 receptor accessory protein                   | ENST00000264260 | 0,706081546 |
| A_21_P0006030  | ENST00000366188  | XLOC_007464    |                                                             | ENST00000366188 | 0,705783738 |
| A_23_P111929   | NM_016023        | OTUD6B         | OTU domain containing 6B                                    | ENST00000524027 | 0,705696384 |
| A_24_P139604   | NM_198930        | PYHIN1         | pyrin and HIN domain family, member 1                       | ENST00000392254 | 0,705470518 |
| A_23_P107693   | NM_017652        | ZNF586         | zinc finger protein 586                                     | ENST00000449441 | 0,705171773 |
| A_33_P3576853  | NR_037857        | LOC254128      | uncharacterized LOC254128                                   |                 | 0,704660297 |
| A_33_P3503937  | AK094426         | LOC284581      | uncharacterized LOC284581                                   |                 | 0,704622832 |
| A_33_P3420496  | NR_003015        | SNORA53        | small nucleolar RNA, H/ACA box 53                           |                 | 0,704142322 |
| A_33_P3214432  | NM_080660        | ZC3HAV1L       | zinc finger CCCH-type, antiviral 1-like                     | ENST00000358573 | 0,704136094 |
| A_21_P0004765  | ENST00000429137  | XLOC_005780    |                                                             | ENST00000429137 | 0,703865122 |
| A_21_P0011986  | TCONS_I2_0001506 | XLOC_I2_008405 |                                                             |                 | 0,703767547 |
| A_33_P3229083  | NM_080593        | HIST1H2BK      | histone cluster 1, H2bk                                     | ENST00000356950 | 0,703709938 |
| A_21_P0012775  | ENST00000509098  | XLOC_I2_011114 |                                                             | ENST00000509098 | 0,703678242 |
| A_19_P00321911 | NR_023915        | IPW            | imprinted in Prader-Willi syndrome (non-protein coding)     | ENST00000553149 | 0,703585101 |
| A_23_P104109   | NM_012424        | RPS6KC1        | ribosomal protein S6 kinase, 52kDa, polypeptide 1           | ENST00000366960 | 0,70355694  |
| A_23_P323243   | NM_173516        | PNLDC1         | poly(A)-specific ribonuclease (PARN)-like domain containing | ENST00000275275 | 0,703248052 |
| A_21_P0012392  | TCONS_I2_0001885 | XLOC_I2_009884 |                                                             |                 | 0,70232751  |
| A_23_P360626   | NM_178836        | PLD6           | phospholipase D family, member 6                            | ENST00000321560 | 0,702271188 |
| A_33_P3347099  | NR_027084        | FLJ36000       | uncharacterized FLJ36000                                    |                 | 0,702254468 |
| A_23_P68868    | NR_002323        | TUG1           | taurine upregulated 1 (non-protein coding)                  |                 | 0,702218633 |
| A_24_P149713   | NM_014007        | ZBTB43         | zinc finger and BTB domain containing 43                    | ENST00000373464 | 0,702148775 |
| A_23_P104109   | NM_012424        | RPS6KC1        | ribosomal protein S6 kinase, 52kDa, polypeptide 1           | ENST00000366960 | 0,702092273 |
| A_21_P0000087  | NM_001172574     | MCPH1          | microcephalin 1                                             |                 | 0,701825531 |
| A_23_P104109   | NM_012424        | RPS6KC1        | ribosomal protein S6 kinase, 52kDa, polypeptide 1           | ENST00000366960 | 0,701582934 |
| A_23_P38723    | NM_015295        | SMCHD1         | structural maintenance of chromosomes flexible hinge dom    | ENST00000320876 | 0,701550609 |
| A_33_P3346669  | NM_016341        | PLCE1          | phospholipase C, epsilon 1                                  | ENST00000371375 | 0,701535246 |

|               |                  |                |                                                           |                 |             |
|---------------|------------------|----------------|-----------------------------------------------------------|-----------------|-------------|
| A_23_P67312   | NM_003437        | ZNF136         | zinc finger protein 136                                   | ENST00000464860 | 0,701385683 |
| A_23_P145024  | NM_000024        | ADRB2          | adrenergic, beta-2-, receptor, surface                    | ENST00000305988 | 0,70101154  |
| A_23_P123424  | NM_000749        | CHRNB3         | cholinergic receptor, nicotinic, beta 3                   | ENST00000289957 | 0,700892761 |
| A_21_P0007249 | THC2674548       | XLOC_009233    |                                                           |                 | 0,700820977 |
| A_23_P150255  | NM_006328        | RBM14          | RNA binding motif protein 14                              | ENST00000310137 | 0,700802778 |
| A_23_P11390   | NM_004679        | VCY            | variable charge, Y-linked                                 | ENST00000250823 | 0,700720573 |
| A_33_P3304304 | ENST00000394478  | STAG2          | stromal antigen 2                                         | ENST00000394478 | 0,700562775 |
| A_23_P57007   | AF090938         | LOC100127886   | uncharacterized LOC100127886                              |                 | 0,700477485 |
| A_21_P0003067 | TCONS_00006328   | XLOC_002945    |                                                           |                 | 0,700425007 |
| A_21_P0006620 | BC036396         | XLOC_008667    |                                                           |                 | 0,700359447 |
| A_24_P39211   | NM_198219        | ING1           | inhibitor of growth family, member 1                      | ENST00000338450 | 0,700324805 |
| A_21_P0005981 | TCONS_00015543   | XLOC_007253    |                                                           |                 | 0,700163607 |
| A_21_P0013194 | NR_039983        | LOC729737      | uncharacterized LOC729737                                 | ENST00000423728 | 0,700040819 |
| A_23_P107693  | NM_017652        | ZNF586         | zinc finger protein 586                                   | ENST00000449441 | 0,699834418 |
| A_23_P107693  | NM_017652        | ZNF586         | zinc finger protein 586                                   | ENST00000449441 | 0,699828276 |
| A_33_P3405897 | NM_014798        | PLEKHM1        | pleckstrin homology domain containing, family M (with RUI | ENST00000397718 | 0,699568381 |
| A_24_P203000  | NM_000878        | IL2RB          | interleukin 2 receptor, beta                              | ENST00000216223 | 0,699495809 |
| A_21_P0010690 | TCONS_I2_0000196 | XLOC_I2_000037 |                                                           |                 | 0,699308088 |
| A_33_P3321275 | NM_170606        | MLL3           | myeloid/lymphoid or mixed-lineage leukemia 3              | ENST00000436174 | 0,699206447 |
| A_33_P3216357 | NM_001146702     | KDM5C          | lysine (K)-specific demethylase 5C                        | ENST00000349663 | 0,699176487 |
| A_24_P262127  | NM_004165        | RRAD           | Ras-related associated with diabetes                      | ENST00000299759 | 0,699095117 |
| A_21_P0000375 | NR_003047        | SNORD19        | small nucleolar RNA, C/D box 19                           |                 | 0,699040836 |
| A_33_P3330323 | NM_001080541     | MGA            | MAX gene associated                                       | ENST00000219905 | 0,69895182  |
| A_23_P104109  | NM_012424        | RPS6KC1        | ribosomal protein S6 kinase, 52kDa, polypeptide 1         | ENST00000366960 | 0,698675733 |
| A_33_P3386995 | NM_015914        | TXNDC11        | thioredoxin domain containing 11                          | ENST00000436567 | 0,698600065 |
| A_33_P3212575 | NM_005386        | NNAT           | neuronatin                                                | ENST00000062104 | 0,698522295 |
| A_21_P0012942 | ENST00000504609  | XLOC_I2_011584 |                                                           | ENST00000504609 | 0,698459553 |
| A_33_P3382595 | NR_001445        | RN7SK          | RNA, 7SK small nuclear                                    | ENST00000421043 | 0,698420709 |
| A_21_P0003454 | ENST00000467484  | XLOC_003912    |                                                           | ENST00000467484 | 0,698314548 |



|               |                 |              |                                                                   |                 |             |
|---------------|-----------------|--------------|-------------------------------------------------------------------|-----------------|-------------|
| A_33_P3261173 | NM_005479       | FRAT1        | frequently rearranged in advanced T-cell lymphomas                | ENST00000490980 | 0,697745026 |
| A_24_P403459  | NM_021068       | IFNA4        | interferon, alpha 4                                               | ENST00000421715 | 0,697527078 |
| A_33_P3336053 | NM_178510       | ANKK1        | ankyrin repeat and kinase domain containing 1                     | ENST00000303941 | 0,697382708 |
| A_33_P3210880 | ENST00000355691 | ATP7A        | ATPase, Cu <sup>++</sup> transporting, alpha polypeptide          | ENST00000355691 | 0,697036615 |
| A_33_P3416420 | NM_145062       | ZUFSP        | zinc finger with UFM1-specific peptidase domain                   | ENST00000368573 | 0,696939056 |
| A_24_P14731   | NM_013271       | PCSK1N       | proprotein convertase subtilisin/kexin type 1 inhibitor           | ENST00000218230 | 0,696895711 |
| A_23_P107693  | NM_017652       | ZNF586       | zinc finger protein 586                                           | ENST00000449441 | 0,696844916 |
| A_23_P103361  | NM_005356       | LCK          | lymphocyte-specific protein tyrosine kinase                       | ENST00000469765 | 0,696725604 |
| A_23_P146783  | NM_004543       | NEB          | nebulin                                                           | ENST00000509223 | 0,696529855 |
| A_21_P0004871 | THC2553854      | XLOC_005244  |                                                                   |                 | 0,696518838 |
| A_21_P0014006 | XM_003403443    | LOC100509263 | uncharacterized LOC100509263                                      |                 | 0,696402936 |
| A_32_P140706  | NM_000535       | PMS2         | PMS2 postmeiotic segregation increased 2 ( <i>S. cerevisiae</i> ) | ENST00000338780 | 0,69622528  |
| A_24_P7202    | NM_020738       | KIDINS220    | kinase D-interacting substrate, 220kDa                            | ENST00000319688 | 0,696175941 |
| A_21_P0001656 | TCONS_00001909  | XLOC_000008  |                                                                   |                 | 0,696138908 |
| A_23_P143016  | NM_212481       | ARID5A       | AT rich interactive domain 5A (MRF1-like)                         | ENST00000412735 | 0,696091162 |
| A_21_P0007370 | TCONS_00019700  | XLOC_009498  |                                                                   |                 | 0,696039324 |
| A_33_P3217490 | NR_038388       | LOC729444    | uncharacterized LOC729444                                         | ENST00000415704 | 0,695773931 |
| A_23_P111929  | NM_016023       | OTUD6B       | OTU domain containing 6B                                          | ENST00000524027 | 0,695304616 |
| A_23_P319423  | NM_003740       | KCNK5        | potassium channel, subfamily K, member 5                          | ENST00000359534 | 0,695095771 |
| A_33_P3322230 | AK056507        | FLJ31945     | uncharacterized LOC440137                                         |                 | 0,694944827 |
| A_33_P3283828 | NM_001143980    | CCDC154      | coiled-coil domain containing 154                                 | ENST00000389176 | 0,69487185  |
| A_21_P0005917 | XR_133508       | LOC100507316 | uncharacterized LOC100507316                                      | ENST00000517411 | 0,694777829 |
| A_23_P104109  | NM_012424       | RPS6KC1      | ribosomal protein S6 kinase, 52kDa, polypeptide 1                 | ENST00000366960 | 0,694765771 |
| A_33_P3391455 | NM_001160161    | SCN5A        | sodium channel, voltage-gated, type V, alpha subunit              | ENST00000399254 | 0,694503057 |
| A_23_P145024  | NM_000024       | ADRB2        | adrenergic, beta-2-, receptor, surface                            | ENST00000305988 | 0,694082419 |
| A_21_P0003018 | BC035247        | XLOC_002779  |                                                                   |                 | 0,693860279 |
| A_23_P58009   | NM_024616       | C3orf52      | chromosome 3 open reading frame 52                                | ENST00000264848 | 0,693849191 |
| A_23_P104109  | NM_012424       | RPS6KC1      | ribosomal protein S6 kinase, 52kDa, polypeptide 1                 | ENST00000366960 | 0,693810704 |
| A_24_P264664  | NM_001271       | CHD2         | chromodomain helicase DNA binding protein 2                       | ENST00000394196 | 0,693694385 |

|               |                  |                |                                                            |                 |             |
|---------------|------------------|----------------|------------------------------------------------------------|-----------------|-------------|
| A_23_P145024  | NM_000024        | ADRB2          | adrenergic, beta-2-, receptor, surface                     | ENST00000305988 | 0,693672084 |
| A_24_P177568  | NM_133473        | ZNF431         | zinc finger protein 431                                    | ENST00000311048 | 0,693614728 |
| A_21_P0000364 | NR_003029        | SNORD9         | small nucleolar RNA, C/D box 9                             |                 | 0,693580096 |
| A_32_P427222  | ENST00000487979  | HEATR7B1       | HEAT repeat containing 7B1                                 | ENST00000487979 | 0,693458136 |
| A_23_P32404   | NM_002201        | ISG20          | interferon stimulated exonuclease gene 20kDa               | ENST00000546338 | 0,692802176 |
| A_33_P3270509 | NM_003031        | SIAH1          | seven in absentia homolog 1 (Drosophila)                   | ENST00000356721 | 0,692670967 |
| A_33_P3283626 | AK289844         | RNPC3          | RNA-binding region (RNP1, RRM) containing 3                | ENST00000524631 | 0,692588055 |
| A_21_P0004875 | TCONS_00011790   | XLOC_005264    |                                                            |                 | 0,692397613 |
| A_21_P0005280 | TCONS_00013117   | XLOC_006335    |                                                            |                 | 0,691799256 |
| A_21_P0014532 | XR_110225        | LOC100287415   |                                                            |                 | 0,691775031 |
| A_23_P217899  | NM_030937        | CCNL2          | cyclin L2                                                  | ENST00000480479 | 0,691434922 |
| A_23_P103361  | NM_005356        | LCK            | lymphocyte-specific protein tyrosine kinase                | ENST00000469765 | 0,691129313 |
| A_33_P3342345 | XR_109229        | LOC400464      | uncharacterized LOC400464                                  |                 | 0,690958358 |
| A_33_P3414267 | NM_001052        | SSTR4          | somatostatin receptor 4                                    | ENST00000255008 | 0,690824776 |
| A_33_P3347040 | NM_001242901     | LOC100131094   | uncharacterized LOC100131094                               | ENST00000381796 | 0,690783984 |
| A_23_P19134   | NM_032119        | GPR98          | G protein-coupled receptor 98                              | ENST00000296619 | 0,690699495 |
| A_23_P30634   | NM_021813        | BACH2          | BTB and CNC homology 1, basic leucine zipper transcription | ENST00000257749 | 0,690311655 |
| A_33_P3378384 | NR_003260        | DNM1P46        | DNM1 pseudogene 46                                         | ENST00000341853 | 0,690272241 |
| A_33_P3407742 | NM_001033556     | PPM1B          | protein phosphatase, Mg2+/Mn2+ dependent, 1B               | ENST00000409895 | 0,689608832 |
| A_32_P69849   | NM_001012978     | BEX5           | brain expressed, X-linked 5                                | ENST00000333643 | 0,68903075  |
| A_23_P111929  | NM_016023        | OTUD6B         | OTU domain containing 6B                                   | ENST00000524027 | 0,688971427 |
| A_32_P112623  | XM_001720463     | FAM27E3        | family with sequence similarity 27, member E3              |                 | 0,688746854 |
| A_21_P0007597 | TCONS_00020499   | XLOC_009820    |                                                            |                 | 0,68840672  |
| A_21_P0011737 | TCONS_I2_0001300 | XLOC_I2_006996 |                                                            |                 | 0,688353797 |
| A_21_P0005389 | THC2730801       | XLOC_006123    |                                                            |                 | 0,688310176 |
| A_23_P104109  | NM_012424        | RPS6KC1        | ribosomal protein S6 kinase, 52kDa, polypeptide 1          | ENST00000366960 | 0,688270044 |
| A_21_P0010936 | ENST00000414939  | XLOC_I2_001875 |                                                            | ENST00000414939 | 0,68816156  |
| A_23_P18276   | NM_005778        | RBM5           | RNA binding motif protein 5                                | ENST00000536082 | 0,687705844 |
| A_33_P3338634 | NM_001146261     | SYT14          | synaptotagmin XIV                                          | ENST00000367019 | 0,687609502 |

|                |                 |                |                                                     |                 |             |
|----------------|-----------------|----------------|-----------------------------------------------------|-----------------|-------------|
| A_33_P3409245  | XR_110199       | LOC401286      | uncharacterized LOC401286                           |                 | 0,687413874 |
| A_32_P180210   | NM_019054       | FAM35A         | family with sequence similarity 35, member A        | ENST00000497389 | 0,687217511 |
| A_21_P0011742  | AK090827        | LOC100506930   | uncharacterized LOC100506930                        |                 | 0,686867296 |
| A_33_P3331726  | NR_027451       | LOC647979      | uncharacterized LOC647979                           |                 | 0,686848824 |
| A_33_P3666346  | NM_015446       | AHCTF1         | AT hook containing transcription factor 1           | ENST00000435109 | 0,686682748 |
| A_21_P0000379  | NR_003056       | SNORD67        | small nucleolar RNA, C/D box 67                     |                 | 0,686624382 |
| A_32_P214284   | XM_003119920    | LOC100129516   | uncharacterized LOC100129516                        |                 | 0,686555695 |
| A_21_P0011037  | THC2553586      | XLOC_I2_002886 |                                                     |                 | 0,686479849 |
| A_19_P00323028 | ENST00000553134 | XLOC_011183    |                                                     | ENST00000553134 | 0,686478362 |
| A_32_P99100    | NM_002844       | PTPRK          | protein tyrosine phosphatase, receptor type, K      | ENST00000368227 | 0,686340745 |
| A_23_P85218    | NM_005634       | SOX3           | SRY (sex determining region Y)-box 3                | ENST00000370536 | 0,686253576 |
| A_21_P0011695  | NR_038279       | LOC100506930   | uncharacterized LOC100506930                        | ENST00000412740 | 0,686005097 |
| A_33_P3221341  | NM_173497       | HECTD2         | HECT domain containing 2                            | ENST00000371681 | 0,685931741 |
| A_19_P00320708 | NR_038889       | LOC401320      | uncharacterized LOC401320                           | ENST00000434399 | 0,685791569 |
| A_21_P0012007  | ENST00000455541 | XLOC_I2_007371 |                                                     | ENST00000455541 | 0,685758746 |
| A_21_P0011259  | CR620068        | XLOC_I2_004317 |                                                     |                 | 0,685522852 |
| A_21_P0000383  | NR_003065       | SNORD84        | small nucleolar RNA, C/D box 84                     | ENST00000467175 | 0,685371378 |
| A_19_P00807748 | THC2564014      | Q8RQM5         |                                                     |                 | 0,685160647 |
| A_23_P106737   | NM_201412       | LUC7L          | LUC7-like ( <i>S. cerevisiae</i> )                  | ENST00000418978 | 0,685114872 |
| A_23_P68155    | NM_022168       | IFIH1          | interferon induced with helicase C domain 1         | ENST00000543192 | 0,684733564 |
| A_33_P3348011  | NR_002936       | TOB2P1         | transducer of ERBB2, 2 pseudogene 1                 |                 | 0,684149357 |
| A_21_P0000599  | NM_013446       | MKRN1          | makorin ring finger protein 1                       | ENST00000437223 | 0,683986786 |
| A_24_P203103   | NM_002351       | SH2D1A         | SH2 domain containing 1A                            | ENST00000371139 | 0,683879884 |
| A_21_P0004642  | NR_026791       | HCG27          | HLA complex group 27 (non-protein coding)           | ENST00000416551 | 0,683816128 |
| A_21_P0010723  | ENST00000417260 | XLOC_I2_000401 |                                                     | ENST00000417260 | 0,683719231 |
| A_24_P941787   | NM_003913       | PRPF4B         | PRP4 pre-mRNA processing factor 4 homolog B (yeast) | ENST00000480058 | 0,683682712 |
| A_21_P0000839  | NR_038923       | LOC254100      | uncharacterized LOC254100                           |                 | 0,683573569 |
| A_21_P0001267  | ENST00000475078 | C1orf144       | chromosome 1 open reading frame 144                 | ENST00000475078 | 0,683409194 |
| A_21_P0011393  | ENST00000507787 | XLOC_I2_004594 |                                                     | ENST00000507787 | 0,68333679  |

|                |                 |                |                                                               |                 |             |
|----------------|-----------------|----------------|---------------------------------------------------------------|-----------------|-------------|
| A_23_P157117   | NM_182898       | CREB5          | cAMP responsive element binding protein 5                     | ENST00000409603 | 0,68325495  |
| A_23_P32217    | NM_005802       | TOPORS         | topoisomerase I binding, arginine/serine-rich, E3 ubiquitin p | ENST00000379858 | 0,683195278 |
| A_24_P923945   | ENST00000375218 | UBR4           | ubiquitin protein ligase E3 component n-recognin 4            | ENST00000375218 | 0,682972123 |
| A_21_P0011770  | BC041478        | XLOC_I2_006718 |                                                               |                 | 0,682830135 |
| A_33_P3390743  | ENST00000494913 | COL20A1        | collagen, type XX, alpha 1                                    | ENST00000494913 | 0,682742528 |
| A_23_P117851   | NM_001030005    | CPLX3          | complexin 3                                                   | ENST00000488000 | 0,682738259 |
| A_23_P107693   | NM_017652       | ZNF586         | zinc finger protein 586                                       | ENST00000449441 | 0,68235695  |
| A_33_P3242829  | ENST00000316005 | PKN2           | protein kinase N2                                             | ENST00000316005 | 0,682295995 |
| A_33_P3275412  | AK127688        | C1orf138       | chromosome 1 open reading frame 138                           |                 | 0,682291369 |
| A_33_P3238032  | NM_001042784    | CCDC158        | coiled-coil domain containing 158                             | ENST00000318586 | 0,681685558 |
| A_23_P346900   | NM_001005505    | CACNA2D2       | calcium channel, voltage-dependent, alpha 2/delta subunit     | ENST00000424201 | 0,681508524 |
| A_33_P3382538  | NM_003772       | JRKL           | jerky homolog-like (mouse)                                    | ENST00000332349 | 0,681430289 |
| A_33_P3304688  | AF463496        | TNAP           | TRAFs and NIK-associated protein                              |                 | 0,681319732 |
| A_23_P145024   | NM_000024       | ADRB2          | adrenergic, beta-2-, receptor, surface                        | ENST00000305988 | 0,680857541 |
| A_19_P00322002 | NR_015431       | FLJ43663       | uncharacterized LOC378805                                     |                 | 0,680660368 |
| A_23_P20732    | NM_012204       | GTF3C4         | general transcription factor IIIC, polypeptide 4, 90kDa       | ENST00000372146 | 0,680578321 |
| A_33_P3291891  | XM_003403452    | LOC100292905   | uncharacterized LOC100292905                                  |                 | 0,680497346 |
| A_21_P0004525  | AK055381        | XLOC_004517    |                                                               |                 | 0,680474394 |
| A_21_P0000274  | NR_002591       | SNORD95        | small nucleolar RNA, C/D box 95                               | ENST00000503170 | 0,680464898 |
| A_24_P182122   | ENST00000361390 | ND1            | NADH dehydrogenase, subunit 1 (complex I)                     | ENST00000361390 | 0,680360925 |
| A_21_P0000030  | NM_001161533    | RBM34          | RNA binding motif protein 34                                  | ENST00000476261 | 0,680299034 |
| A_23_P119196   | NM_016270       | KLF2           | Kruppel-like factor 2 (lung)                                  | ENST00000248071 | 0,679831452 |
| A_33_P3224307  | NR_003010       | SCARNA12       | small Cajal body-specific RNA 12                              | ENST00000537646 | 0,679816424 |
| A_24_P364838   | NM_004785       | SLC9A3R2       | solute carrier family 9 (sodium/hydrogen exchanger), mem1     | ENST00000424542 | 0,679762146 |
| A_21_P0014791  | XR_132586       | LOC100652804   | uncharacterized LOC100652804                                  |                 | 0,679600134 |
| A_23_P11070    | NM_032553       | GPR174         | G protein-coupled receptor 174                                | ENST00000276077 | 0,67915319  |
| A_32_P155826   | NR_026742       | LOC158572      | uncharacterized LOC158572                                     |                 | 0,679121642 |
| A_33_P3253069  | ENST00000368053 | MED23          | mediator complex subunit 23                                   | ENST00000368053 | 0,678675569 |
| A_24_P324814   | NM_138363       | CEP95          | centrosomal protein 95kDa                                     | ENST00000556440 | 0,678640622 |

|                |                 |              |                                                            |                 |             |
|----------------|-----------------|--------------|------------------------------------------------------------|-----------------|-------------|
| A_33_P3318861  | NM_001093730    | DYTN         | dystrotelin                                                | ENST00000452335 | 0,678638374 |
| A_33_P3236748  | XR_111551       | UNQ9370      | IFMQ9370                                                   | ENST00000556630 | 0,678542758 |
| A_23_P47077    | NM_004281       | BAG3         | BCL2-associated athanogene 3                               | ENST00000369085 | 0,678481975 |
| A_23_P147439   | NM_148416       | ATXN2L       | ataxin 2-like                                              | ENST00000359153 | 0,678231736 |
| A_19_P00315693 | NR_002323       | TUG1         |                                                            |                 | 0,677997861 |
| A_33_P3342628  | NM_021170       | HES4         | hairy and enhancer of split 4 (Drosophila)                 | ENST00000304952 | 0,677932786 |
| A_33_P3304533  | ENST00000466994 | RNF207       | ring finger protein 207                                    | ENST00000466994 | 0,677867652 |
| A_24_P193093   | NM_007360       | KLRK1        | killer cell lectin-like receptor subfamily K, member 1     | ENST00000396451 | 0,677824994 |
| A_23_P137238   | NM_004653       | KDM5D        | lysine (K)-specific demethylase 5D                         | ENST00000492117 | 0,677678336 |
| A_33_P3411307  | AK128269        | LOC100130276 | uncharacterized LOC100130276                               |                 | 0,677485522 |
| A_33_P3368800  | NM_017940       | NBPF1        | neuroblastoma breakpoint family, member 1                  | ENST00000429672 | 0,677419831 |
| A_33_P3233135  | NM_001199866    | KIF16B       | kinesin family member 16B                                  | ENST00000408042 | 0,677265457 |
| A_21_P0006393  | TCONS_00016868  | XLOC_007850  |                                                            |                 | 0,677234511 |
| A_21_P0006942  | TCONS_00018397  | XLOC_008679  |                                                            |                 | 0,676989181 |
| A_23_P42935    | NM_004333       | BRAF         | v-raf murine sarcoma viral oncogene homolog B1             | ENST00000497784 | 0,676891519 |
| A_21_P0004308  | TCONS_00010118  | XLOC_004584  |                                                            |                 | 0,676423301 |
| A_23_P101811   | NM_021030       | ZNF14        | zinc finger protein 14                                     | ENST00000344099 | 0,676383233 |
| A_23_P1102     | NM_001100       | ACTA1        | actin, alpha 1, skeletal muscle                            | ENST00000366682 | 0,676202786 |
| A_23_P307400   | NM_138363       | CEP95        | centrosomal protein 95kDa                                  | ENST00000556440 | 0,676155297 |
| A_24_P337058   | NM_020307       | CCNL1        | cyclin L1                                                  | ENST00000468977 | 0,675977015 |
| A_33_P3375541  | NM_000732       | CD3D         | CD3d molecule, delta (CD3-TCR complex)                     | ENST00000300692 | 0,675957474 |
| A_23_P115161   | NM_002036       | DARC         | Duffy blood group, chemokine receptor                      | ENST00000435307 | 0,675871764 |
| A_33_P3349883  | ENST00000366583 | LGALS8       | lectin, galactoside-binding, soluble, 8                    | ENST00000366583 | 0,675522574 |
| A_21_P0003691  | TCONS_00008360  | XLOC_003810  |                                                            |                 | 0,675442006 |
| A_23_P110699   | NM_052860       | ZNF300       | zinc finger protein 300                                    | ENST00000394226 | 0,675419647 |
| A_23_P63432    | NM_017821       | RHBDL2       | rhomboid, veinlet-like 2 (Drosophila)                      | ENST00000372985 | 0,675289139 |
| A_23_P325661   | NM_003435       | ZNF134       | zinc finger protein 134                                    | ENST00000396161 | 0,67494771  |
| A_24_P341923   | NM_020964       | EPG5         | ectopic P-granules autophagy protein 5 homolog (C. elegan. | ENST00000308403 | 0,674887299 |
| A_23_P103361   | NM_005356       | LCK          | lymphocyte-specific protein tyrosine kinase                | ENST00000469765 | 0,674537539 |



|               |                  |                |                                                           |                 |             |
|---------------|------------------|----------------|-----------------------------------------------------------|-----------------|-------------|
| A_21_P0014778 | XR_132555        | LOC100507516   | uncharacterized LOC100507516                              |                 | 0,674506344 |
| A_33_P3357049 | NR_026768        | RPS15AP10      | ribosomal protein S15a pseudogene 10                      |                 | 0,674339085 |
| A_21_P0011625 | NR_027418        | LOC100499466   | uncharacterized LOC100499466                              |                 | 0,674316705 |
| A_33_P3310189 | NM_000684        | ADRB1          | adrenergic, beta-1-, receptor                             | ENST00000369295 | 0,674215978 |
| A_23_P30554   | NM_001034837     | KCNIP1         | Kv channel interacting protein 1                          | ENST00000520740 | 0,673808455 |
| A_24_P3783    | NM_003521        | HIST1H2BM      | histone cluster 1, H2bm                                   | ENST00000359465 | 0,673707802 |
| A_21_P0004527 | TCONS_00010790   | XLOC_004554    |                                                           |                 | 0,67364687  |
| A_33_P3376821 | NM_006144        | GZMA           | granzyme A (granzyme 1, cytotoxic T-lymphocyte-associated | ENST00000274306 | 0,673558139 |
| A_33_P3340294 | NM_053043        | RBM33          | RNA binding motif protein 33                              | ENST00000401878 | 0,673551891 |
| A_23_P325625  | NM_173690        | SCAI           | suppressor of cancer cell invasion                        | ENST00000467917 | 0,673382147 |
| A_21_P0000387 | NR_003071        | SNORD90        | small nucleolar RNA, C/D box 90                           |                 | 0,673355488 |
| A_33_P3459365 | NR_034007        | LOC339894      | uncharacterized LOC339894                                 | ENST00000471357 | 0,673238398 |
| A_23_P42935   | NM_004333        | BRAF           | v-raf murine sarcoma viral oncogene homolog B1            | ENST00000497784 | 0,673063791 |
| A_23_P30799   | NM_021018        | HIST1H3F       | histone cluster 1, H3f                                    | ENST00000446824 | 0,672796569 |
| A_23_P42935   | NM_004333        | BRAF           | v-raf murine sarcoma viral oncogene homolog B1            | ENST00000497784 | 0,672783327 |
| A_21_P0013235 | TCONS_I2_0002597 | XLOC_I2_013462 |                                                           |                 | 0,67274874  |
| A_23_P256391  | NM_002078        | GOLGA4         | golgin A4                                                 | ENST00000361924 | 0,672572604 |
| A_23_P26386   | NM_016140        | TPPP3          | tubulin polymerization-promoting protein family member 3  | ENST00000290942 | 0,672542652 |
| A_23_P106737  | NM_201412        | LUC7L          | LUC7-like ( <i>S. cerevisiae</i> )                        | ENST00000418978 | 0,672461149 |
| A_23_P117261  | NM_130806        | RXFP2          | relaxin/insulin-like family peptide receptor 2            | ENST00000298386 | 0,672371584 |
| A_21_P0005979 | ENST00000521804  | SLC45A4        | solute carrier family 45, member 4                        | ENST00000521804 | 0,672090058 |
| A_23_P316085  | NR_045180        | SPG20OS        | SPG20 opposite strand                                     | ENST00000493739 | 0,671925838 |
| A_23_P10025   | NM_006159        | NELL2          | NEL-like 2 (chicken)                                      | ENST00000437801 | 0,671854263 |
| A_33_P3292337 | NM_004521        | KIF5B          | kinesin family member 5B                                  | ENST00000302418 | 0,671670813 |
| A_23_P110699  | NM_052860        | ZNF300         | zinc finger protein 300                                   | ENST00000394226 | 0,671656595 |
| A_23_P55376   | NM_015443        | KIAA1267       | KIAA1267                                                  | ENST00000262419 | 0,671496999 |
| A_21_P0014277 | ENST00000553105  | LOC100506606   |                                                           | ENST00000553105 | 0,671471226 |
| A_24_P928473  | AK092832         | LOC728543      | uncharacterized LOC728543                                 |                 | 0,671231375 |
| A_21_P0000314 | NR_002958        | SNORA17        | small nucleolar RNA, H/ACA box 17                         | ENST00000447221 | 0,671212053 |

|               |                 |                |                                                          |                 |             |
|---------------|-----------------|----------------|----------------------------------------------------------|-----------------|-------------|
| A_21_P0013856 | THC2516011      | XLOC_I2_015641 |                                                          |                 | 0,671101507 |
| A_33_P3247540 | NR_027420       | LOC389834      | ankyrin repeat domain 57 pseudogene                      |                 | 0,670969952 |
| A_23_P106737  | NM_201412       | LUC7L          | LUC7-like ( <i>S. cerevisiae</i> )                       | ENST00000418978 | 0,670915729 |
| A_21_P0011811 | NR_015424       | ANKRD36BP2     | ankyrin repeat domain 36B pseudogene 2                   |                 | 0,67085315  |
| A_21_P0013397 | ENST00000425880 | XLOC_I2_013529 |                                                          | ENST00000425880 | 0,670528088 |
| A_23_P109913  | NM_006564       | CXCR6          | chemokine (C-X-C motif) receptor 6                       | ENST00000438735 | 0,670498572 |
| A_33_P3383184 | ENST00000394967 | SP9            | Sp9 transcription factor homolog (mouse)                 | ENST00000394967 | 0,670455497 |
| A_23_P42935   | NM_004333       | BRAF           | v-raf murine sarcoma viral oncogene homolog B1           | ENST00000497784 | 0,670364402 |
| A_33_P3343976 | NR_026751       | ZNRD1-AS1      | ZNRD1 antisense RNA 1 (non-protein coding)               | ENST00000427107 | 0,670353799 |
| A_23_P99604   | NM_017769       | G2E3           | G2/M-phase specific E3 ubiquitin protein ligase          | ENST00000549159 | 0,670312971 |
| A_23_P132915  | NM_138389       | FAM114A1       | family with sequence similarity 114, member A1           | ENST00000508737 | 0,669749831 |
| A_23_P119196  | NM_016270       | KLF2           | Kruppel-like factor 2 (lung)                             | ENST00000248071 | 0,669367149 |
| A_23_P45999   | NM_012168       | FBXO2          | F-box protein 2                                          | ENST00000354287 | 0,669295029 |
| A_24_P413669  | NM_001018053    | PFKFB2         | 6-phosphofructo-2-kinase/fructose-2,6-biphosphatase 2    | ENST00000367079 | 0,669170194 |
| A_23_P254573  | NM_014377       | DNAJC2         | DnaJ (Hsp40) homolog, subfamily C, member 2              | ENST00000464253 | 0,669027507 |
| A_21_P0004500 | TCONS_00010663  | XLOC_004339    |                                                          |                 | 0,668755563 |
| A_23_P339053  | BC027604        | C16orf52       | chromosome 16 open reading frame 52                      |                 | 0,66870645  |
| A_21_P0014925 | DA569430        | LOC100505857   |                                                          |                 | 0,668685319 |
| A_24_P307827  | NM_001080435    | WHAMM          | WAS protein homolog associated with actin, golgi membrar | ENST00000286760 | 0,668591617 |
| A_21_P0014061 | ENST00000445098 | NCRNA00083     |                                                          | ENST00000445098 | 0,668479258 |
| A_21_P0014358 | XR_109439       | LOC100507520   | uncharacterized LOC100507520                             |                 | 0,66844412  |
| A_23_P103503  | NM_002393       | MDM4           | Mdm4 p53 binding protein homolog (mouse)                 | ENST00000391947 | 0,668211757 |
| A_24_P324368  | NM_032364       | DNAJC14        | DnaJ (Hsp40) homolog, subfamily C, member 14             | ENST00000317287 | 0,667899568 |
| A_21_P0004680 | ENST00000415883 | XLOC_005437    |                                                          | ENST00000415883 | 0,667761792 |
| A_33_P3400152 | NR_038444       | LOC728558      | uncharacterized LOC728558                                | ENST00000414006 | 0,667755757 |
| A_24_P315500  | NR_024567       | LOC100130557   | uncharacterized LOC100130557                             |                 | 0,667662265 |
| A_33_P3287685 | NM_014516       | CNOT3          | CCR4-NOT transcription complex, subunit 3                | ENST00000482247 | 0,667549492 |
| A_33_P3318237 | NM_006244       | PPP2R5B        | protein phosphatase 2, regulatory subunit B', beta       | ENST00000359279 | 0,667438376 |
| A_23_P42935   | NM_004333       | BRAF           | v-raf murine sarcoma viral oncogene homolog B1           | ENST00000497784 | 0,667257796 |

|                |                  |                |                                                           |                 |             |
|----------------|------------------|----------------|-----------------------------------------------------------|-----------------|-------------|
| A_21_P0004902  | ENST00000452402  | XLOC_005365    |                                                           | ENST00000452402 | 0,667232562 |
| A_32_P173298   | NM_012426        | SF3B3          | splicing factor 3b, subunit 3, 130kDa                     | ENST00000310750 | 0,666929079 |
| A_21_P0012219  | TCONS_I2_0001742 | XLOC_I2_009136 |                                                           |                 | 0,66665888  |
| A_33_P3209511  | ENST00000402268  | HAAO           | 3-hydroxyanthranilate 3,4-dioxygenase                     | ENST00000402268 | 0,666489003 |
| A_33_P3391796  | NM_005450        | NOG            | noggin                                                    | ENST00000332822 | 0,666467682 |
| A_21_P0002398  | TCONS_00004131   | XLOC_001974    |                                                           |                 | 0,666454205 |
| A_21_P0000157  | NM_001204818     | LOC100293516   | zinc finger protein                                       |                 | 0,66635695  |
| A_21_P0000344  | NM_001007074     | RPL32          | ribosomal protein L32                                     | ENST00000396953 | 0,666332023 |
| A_23_P103503   | NM_002393        | MDM4           | Mdm4 p53 binding protein homolog (mouse)                  | ENST00000391947 | 0,665960994 |
| A_33_P3346292  | ENST00000379225  | UBAP2          | ubiquitin associated protein 2                            | ENST00000379225 | 0,665907066 |
| A_23_P103503   | NM_002393        | MDM4           | Mdm4 p53 binding protein homolog (mouse)                  | ENST00000391947 | 0,665861486 |
| A_23_P111929   | NM_016023        | OTUD6B         | OTU domain containing 6B                                  | ENST00000524027 | 0,665615458 |
| A_21_P0012115  | TCONS_I2_0001622 | XLOC_I2_008599 |                                                           |                 | 0,665471329 |
| A_21_P0003630  | THC2706940       | XLOC_003613    |                                                           |                 | 0,665404116 |
| A_33_P3216994  | NM_015601        | HERC4          | hect domain and RLD 4                                     | ENST00000395185 | 0,665347538 |
| A_19_P00322938 | NR_038889        | LOC401320      | uncharacterized LOC401320                                 | ENST00000434399 | 0,665207312 |
| A_23_P157416   | NM_032164        | ZNF394         | zinc finger protein 394                                   | ENST00000337673 | 0,665200431 |
| A_21_P0011582  | BE079260         | XLOC_I2_006033 |                                                           |                 | 0,664959162 |
| A_33_P3234457  | ENST00000542061  | FBRSL1         | fibrosin-like 1                                           | ENST00000542061 | 0,664351056 |
| A_23_P108404   | NM_001037131     | AGAP1          | ArfGAP with GTPase domain, ankyrin repeat and PH domain   | ENST00000304032 | 0,664087975 |
| A_21_P0012149  | ENST00000417630  | XLOC_I2_008639 |                                                           | ENST00000417630 | 0,663967549 |
| A_23_P428298   | NM_173561        | UNC5CL         | unc-5 homolog C (C. elegans)-like                         | ENST00000244565 | 0,663717414 |
| A_21_P0000086  | NM_001172557     | GOLGA3         | golgin A3                                                 | ENST00000545875 | 0,66366936  |
| A_23_P106737   | NM_201412        | LUC7L          | LUC7-like (S. cerevisiae)                                 | ENST00000418978 | 0,663642377 |
| A_23_P106737   | NM_201412        | LUC7L          | LUC7-like (S. cerevisiae)                                 | ENST00000418978 | 0,663064439 |
| A_23_P79978    | NM_020689        | SLC24A3        | solute carrier family 24 (sodium/potassium/calcium exchan | ENST00000328041 | 0,662802922 |
| A_24_P16214    | AK090827         | LOC100506930   | uncharacterized LOC100506930                              |                 | 0,662696127 |
| A_21_P0009964  | XR_109619        | LOC100506053   | uncharacterized LOC100506053                              |                 | 0,662403486 |
| A_23_P113462   | NM_017641        | KIF21A         | kinesin family member 21A                                 | ENST00000395670 | 0,662282587 |

|                |                 |                |                                                                       |                 |             |
|----------------|-----------------|----------------|-----------------------------------------------------------------------|-----------------|-------------|
| A_21_P0010876  | ENST00000532854 | XLOC_I2_001971 |                                                                       | ENST00000532854 | 0,662257126 |
| A_33_P3293114  | NM_001190987    | SRSF11         | serine/arginine-rich splicing factor 11                               | ENST00000395136 | 0,662186113 |
| A_33_P3320079  | NM_005596       | NFIB           | nuclear factor I/B                                                    | ENST00000380924 | 0,661903618 |
| A_21_P0005289  | ENST00000412197 | XLOC_006380    |                                                                       | ENST00000412197 | 0,66189224  |
| A_23_P117261   | NM_130806       | RXFP2          | relaxin/insulin-like family peptide receptor 2                        | ENST00000298386 | 0,661827166 |
| A_23_P42935    | NM_004333       | BRAF           | v-raf murine sarcoma viral oncogene homolog B1                        | ENST00000497784 | 0,661794375 |
| A_23_P87011    | NM_001001522    | TAGLN          | transgelin                                                            | ENST00000392951 | 0,661780195 |
| A_21_P0014243  | ENST00000438380 | LOC100505607   |                                                                       | ENST00000438380 | 0,661778224 |
| A_19_P00322109 | NR_038889       | LOC401320      | uncharacterized LOC401320                                             | ENST00000426529 | 0,661721501 |
| A_23_P106737   | NM_201412       | LUC7L          | LUC7-like ( <i>S. cerevisiae</i> )                                    | ENST00000418978 | 0,661699691 |
| A_23_P250813   | NM_000553       | WRN            | Werner syndrome, RecQ helicase-like                                   | ENST00000521620 | 0,661587214 |
| A_23_P40078    | NM_003400       | XPO1           | exportin 1 (CRM1 homolog, yeast)                                      | ENST00000406957 | 0,661573326 |
| A_33_P3296289  | XR_132508       | LOC100128508   | PP12100                                                               |                 | 0,661516156 |
| A_23_P164927   | NM_012451       | SYNGR4         | synaptogyrin 4                                                        | ENST00000344846 | 0,661502062 |
| A_21_P0011020  | AK126420        | XLOC_I2_002790 |                                                                       |                 | 0,661403272 |
| A_21_P0004993  | THC2497134      | XLOC_005587    |                                                                       |                 | 0,661334553 |
| A_23_P333138   | NM_015026       | MON2           | MON2 homolog ( <i>S. cerevisiae</i> )                                 | ENST00000393630 | 0,661064306 |
| A_21_P0014889  | ENST00000533434 | LOC100507431   |                                                                       | ENST00000533434 | 0,661047626 |
| A_24_P189739   | NM_030640       | DUSP16         | dual specificity phosphatase 16                                       | ENST00000228862 | 0,6608979   |
| A_23_P322      | NM_182690       | EFNA4          | ephrin-A4                                                             | ENST00000359751 | 0,66055018  |
| A_21_P0009519  | TCONS_00026399  | XLOC_012750    |                                                                       |                 | 0,66051331  |
| A_21_P0000074  | NM_001168394    | C5orf41        | chromosome 5 open reading frame 41                                    | ENST00000522692 | 0,660269354 |
| A_21_P0005767  | TCONS_00014866  | XLOC_006935    |                                                                       |                 | 0,660201617 |
| A_33_P3332997  | ENST00000557418 | FOXA1          | forkhead box A1                                                       | ENST00000557418 | 0,659642925 |
| A_33_P3307008  | NM_001146197    | CCDC168        | coiled-coil domain containing 168                                     | ENST00000322527 | 0,659492382 |
| A_33_P3314356  | ENST00000315194 | PPM1K          | protein phosphatase, Mg <sup>2+</sup> /Mn <sup>2+</sup> dependent, 1K | ENST00000315194 | 0,659446459 |
| A_24_P694820   | XR_132741       | LOC100652917   | uncharacterized LOC100652917                                          |                 | 0,65920223  |
| A_23_P89062    | NR_024034       | KIAA0664L3     | KIAA0664-like 3                                                       |                 | 0,659194417 |
| A_23_P60472    | NM_018449       | UBAP2          | ubiquitin associated protein 2                                        | ENST00000379235 | 0,659014186 |

|               |                                 |              |                                                   |                 |             |
|---------------|---------------------------------|--------------|---------------------------------------------------|-----------------|-------------|
| A_23_P140029  | NM_007106                       | UBL3         | ubiquitin-like 3                                  | ENST00000380680 | 0,658847613 |
| A_24_P106839  | NM_023034                       | WHSC1L1      | Wolf-Hirschhorn syndrome candidate 1-like 1       | ENST00000528828 | 0,658823306 |
| A_21_P0011826 | TCONS_I2_0001384;XLOC_I2_007449 |              |                                                   |                 | 0,658695363 |
| A_23_P106737  | NM_201412                       | LUC7L        | LUC7-like ( <i>S. cerevisiae</i> )                | ENST00000418978 | 0,658443874 |
| A_23_P90743   | NM_002909                       | REG1A        | regenerating islet-derived 1 alpha                | ENST00000233735 | 0,658422913 |
| A_33_P3243394 | ENST00000383718                 | SLMAP        | sarcolemma associated protein                     | ENST00000383718 | 0,658325672 |
| A_21_P0001050 | ENST00000417262                 | XLOC_000527  |                                                   | ENST00000417262 | 0,658290623 |
| A_23_P103361  | NM_005356                       | LCK          | lymphocyte-specific protein tyrosine kinase       | ENST00000469765 | 0,658145526 |
| A_21_P0000496 | NR_004395                       | SNORD1A      | small nucleolar RNA, C/D box 1A                   |                 | 0,658121196 |
| A_23_P113462  | NM_017641                       | KIF21A       | kinesin family member 21A                         | ENST00000395670 | 0,658121003 |
| A_23_P103837  | NM_001127320                    | UBAP2L       | ubiquitin associated protein 2-like               | ENST00000475373 | 0,658109483 |
| A_21_P0001906 | THC2677671                      | XLOC_001632  |                                                   |                 | 0,658058831 |
| A_23_P42935   | NM_004333                       | BRAF         | v-raf murine sarcoma viral oncogene homolog B1    | ENST00000497784 | 0,658054659 |
| A_23_P59714   | NR_026902                       | MGC16142     | uncharacterized protein MGC16142                  |                 | 0,657819974 |
| A_21_P0003604 | TCONS_00008057                  | XLOC_003522  |                                                   |                 | 0,657368732 |
| A_23_P250813  | NM_000553                       | WRN          | Werner syndrome, RecQ helicase-like               | ENST00000521620 | 0,657166517 |
| A_21_P0000122 | NM_001195081                    | LOC100288814 | uncharacterized protein LOC100288814              |                 | 0,656956413 |
| A_33_P3294951 | NM_001097643                    | TAS2R30      | taste receptor, type 2, member 30                 | ENST00000539585 | 0,656905333 |
| A_33_P3276693 | NM_002632                       | PGF          | placental growth factor                           | ENST00000555567 | 0,656828414 |
| A_23_P46470   | NM_018948                       | ERRF1        | ERBB receptor feedback inhibitor 1                | ENST00000377482 | 0,656755264 |
| A_24_P113221  | NM_006965                       | ZNF24        | zinc finger protein 24                            | ENST00000399061 | 0,656477782 |
| A_23_P103503  | NM_002393                       | MDM4         | Mdm4 p53 binding protein homolog (mouse)          | ENST00000391947 | 0,656242113 |
| A_33_P3332937 | BX648740                        | MIPEPP3      | mitochondrial intermediate peptidase pseudogene 3 |                 | 0,656215445 |
| A_23_P434347  | NM_147152                       | ITSN2        | intersectin 2                                     | ENST00000445614 | 0,656062193 |
| A_21_P0005047 | TCONS_00012236                  | XLOC_005793  |                                                   |                 | 0,656046899 |
| A_23_P65089   | NM_016355                       | DDX47        | DEAD (Asp-Glu-Ala-Asp) box polypeptide 47         | ENST00000534843 | 0,656023764 |
| A_23_P371215  | NM_012092                       | ICOS         | inducible T-cell co-stimulator                    | ENST00000316386 | 0,655846566 |
| A_33_P3324454 | NM_000391                       | TPP1         | tripeptidyl peptidase I                           | ENST00000453338 | 0,655581123 |
| A_23_P250813  | NM_000553                       | WRN          | Werner syndrome, RecQ helicase-like               | ENST00000521620 | 0,655489407 |



|                |                  |                |                                                                               |                 |             |
|----------------|------------------|----------------|-------------------------------------------------------------------------------|-----------------|-------------|
| A_33_P3214925  | ENST00000477990  | MIB2           | mindbomb homolog 2 (Drosophila)                                               | ENST00000477990 | 0,65542765  |
| A_33_P3397150  | NM_001190467     | FLJ22184       | putative uncharacterized protein FLJ22184                                     | ENST00000327607 | 0,65532394  |
| A_32_P22622    | NM_003703        | NOP14          | NOP14 nucleolar protein homolog (yeast)                                       | ENST00000546137 | 0,655254829 |
| A_33_P3229241  | NM_001024599     | HIST2H2BF      | histone cluster 2, H2bf                                                       |                 | 0,655222738 |
| A_23_P255896   | NM_001080824     | C2orf89        | chromosome 2 open reading frame 89                                            | ENST00000335459 | 0,655170006 |
| A_23_P103503   | NM_002393        | MDM4           | Mdm4 p53 binding protein homolog (mouse)                                      | ENST00000391947 | 0,654883748 |
| A_24_P230948   | NM_016831        | PER3           | period homolog 3 (Drosophila)                                                 | ENST00000377541 | 0,65475932  |
| A_21_P0000221  | NR_000021        | SNORD32A       | small nucleolar RNA, C/D box 32A                                              | ENST00000486930 | 0,654557919 |
| A_21_P0013893  | TCONS_I2_0003092 | XLOC_I2_015938 |                                                                               |                 | 0,654542348 |
| A_23_P85269    | NM_133378        | TTN            | titin                                                                         | ENST00000356127 | 0,654368271 |
| A_33_P3302423  | NM_001142640     | TNRC6C         | trinucleotide repeat containing 6C                                            | ENST00000335749 | 0,654329136 |
| A_23_P103837   | NM_001127320     | UBAP2L         | ubiquitin associated protein 2-like                                           | ENST00000475373 | 0,654317655 |
| A_21_P0011611  | NM_173628        | DNAH17         | dynein, axonemal, heavy chain 17                                              | ENST00000389840 | 0,654038891 |
| A_33_P3242383  | ENST00000504956  | AFF1           | AF4/FMR2 family, member 1                                                     | ENST00000504956 | 0,653677736 |
| A_23_P106737   | NM_201412        | LUC7L          | LUC7-like ( <i>S. cerevisiae</i> )                                            | ENST00000418978 | 0,653599394 |
| A_33_P3271445  | NM_001130105     | COL4A3BP       | collagen, type IV, alpha 3 (Goodpasture antigen) binding pr                   | ENST00000357457 | 0,653525488 |
| A_21_P0008482  | NR_015430        | C14orf64       | chromosome 14 open reading frame 64                                           | ENST00000499006 | 0,653386306 |
| A_21_P0010774  | THC2542300       | XLOC_I2_001091 |                                                                               |                 | 0,653372618 |
| A_21_P0010859  | ENST00000414939  | XLOC_I2_001875 |                                                                               | ENST00000414939 | 0,653228141 |
| A_21_P0011407  | NR_003521        | WHAMMP3        | WAS protein homolog associated with actin, golgi membranes and microtubules p |                 | 0,652993216 |
| A_33_P3270218  | ENST00000404008  | USP42          | ubiquitin specific peptidase 42                                               | ENST00000404008 | 0,652650914 |
| A_33_P3290296  | AK125829         | LOC100130175   | uncharacterized LOC100130175                                                  |                 | 0,652498995 |
| A_33_P3318946  | NM_021817        | HAPLN2         | hyaluronan and proteoglycan link protein 2                                    | ENST00000255039 | 0,652183162 |
| A_21_P0007203  | TCONS_00019285   | XLOC_009118    |                                                                               |                 | 0,65186496  |
| A_33_P3405429  | ENST00000473325  | VWA5B1         | von Willebrand factor A domain containing 5B1                                 | ENST00000473325 | 0,651850636 |
| A_24_P922631   | NM_001102609     | C5orf58        | chromosome 5 open reading frame 58                                            | ENST00000521850 | 0,651790358 |
| A_19_P00317449 | NM_178549        | ZNF678         |                                                                               |                 | 0,651669687 |
| A_24_P136551   | ENST00000374747  | NPLOC4         | nuclear protein localization 4 homolog ( <i>S. cerevisiae</i> )               | ENST00000374747 | 0,651639291 |
| A_33_P3847514  | NM_001145652     | C6orf141       | chromosome 6 open reading frame 141                                           | ENST00000415078 | 0,651519674 |

|               |                 |             |                                                            |                 |             |
|---------------|-----------------|-------------|------------------------------------------------------------|-----------------|-------------|
| A_33_P3290085 | NM_032164       | ZNF394      | zinc finger protein 394                                    | ENST00000337673 | 0,651408191 |
| A_23_P112412  | NM_017746       | TEX10       | testis expressed 10                                        | ENST00000444730 | 0,651164769 |
| A_23_P408232  | NR_024396       | MGC23270    | uncharacterized LOC196872                                  | ENST00000555578 | 0,651022935 |
| A_21_P0010322 | TCONS_00029300  | XLOC_014097 |                                                            |                 | 0,651016825 |
| A_23_P316582  | NM_152355       | ZNF441      | zinc finger protein 441                                    | ENST00000454339 | 0,65044139  |
| A_33_P3805085 | NM_133372       | FNIP1       | folliculin interacting protein 1                           | ENST00000544351 | 0,650387373 |
| A_33_P3391521 | ENST00000366589 | ERO1LB      | ERO1-like beta ( <i>S. cerevisiae</i> )                    | ENST00000366589 | 0,650150637 |
| A_33_P3272808 | NM_017952       | PTCD3       | Pentatricopeptide repeat domain 3                          | ENST00000254630 | 0,65013255  |
| A_21_P0005891 | TCONS_00015146  | XLOC_007189 |                                                            |                 | 0,650129585 |
| A_23_P106737  | NM_201412       | LUC7L       | LUC7-like ( <i>S. cerevisiae</i> )                         | ENST00000418978 | 0,649884962 |
| A_24_P144881  | NM_005977       | RNF6        | ring finger protein (C3H2C3 type) 6                        | ENST00000476347 | 0,649754229 |
| A_24_P7157    | NM_020734       | RIMKLB      | ribosomal modification protein rimK-like family member B   | ENST00000299673 | 0,649445585 |
| A_21_P0006767 | ENST00000451946 | XLOC_008838 |                                                            | ENST00000451946 | 0,649438288 |
| A_24_P45476   | NM_002995       | XCL1        | chemokine (C motif) ligand 1                               | ENST00000367818 | 0,649409734 |
| A_21_P0000260 | NR_002571       | SNORD58A    | small nucleolar RNA, C/D box 58A                           |                 | 0,649374452 |
| A_23_P110882  | NM_021648       | TSPYL4      | TSPY-like 4                                                | ENST00000420283 | 0,649085184 |
| A_23_P119196  | NM_016270       | KLF2        | Kruppel-like factor 2 (lung)                               | ENST00000248071 | 0,649020752 |
| A_23_P113462  | NM_017641       | KIF21A      | kinesin family member 21A                                  | ENST00000395670 | 0,648666998 |
| A_23_P301896  | NM_015866       | PRDM2       | PR domain containing 2, with ZNF domain                    | ENST00000343137 | 0,648591982 |
| A_23_P354894  | NM_152603       | ZNF567      | zinc finger protein 567                                    | ENST00000360729 | 0,648004252 |
| A_33_P3234593 | ENST00000401491 | BRD7        | bromodomain containing 7                                   | ENST00000401491 | 0,647986497 |
| A_33_P3372069 | NM_182971       | COX8C       | cytochrome c oxidase subunit VIIIc                         | ENST00000342144 | 0,647868568 |
| A_23_P379789  | NM_013305       | ST8SIA5     | ST8 alpha-N-acetyl-neuraminide alpha-2,8-sialyltransferase | ENST00000315087 | 0,647627557 |
| A_23_P103837  | NM_001127320    | UBAP2L      | ubiquitin associated protein 2-like                        | ENST00000475373 | 0,647401327 |
| A_33_P3377304 | NM_001198531    | TCF7L2      | transcription factor 7-like 2 (T-cell specific, HMG-box)   | ENST00000346198 | 0,647366546 |
| A_23_P103503  | NM_002393       | MDM4        | Mdm4 p53 binding protein homolog (mouse)                   | ENST00000391947 | 0,647118541 |
| A_23_P129659  | NM_138447       | ZNF689      | zinc finger protein 689                                    | ENST00000443190 | 0,646925944 |
| A_23_P101811  | NM_021030       | ZNF14       | zinc finger protein 14                                     | ENST00000344099 | 0,646726411 |
| A_23_P407565  | NM_001337       | CX3CR1      | chemokine (C-X3-C motif) receptor 1                        | ENST00000541347 | 0,646724621 |

|               |                 |                |                                                                 |                 |             |
|---------------|-----------------|----------------|-----------------------------------------------------------------|-----------------|-------------|
| A_33_P3242508 | NM_199450       | ZNF365         | zinc finger protein 365                                         | ENST00000395255 | 0,646644931 |
| A_21_P0013047 | NR_040022       | LOC100289495   | uncharacterized LOC100289495                                    |                 | 0,646583728 |
| A_33_P3842770 | BC022881        | LOC644450      | uncharacterized LOC644450                                       |                 | 0,646583717 |
| A_23_P501080  | NM_007139       | ZNF92          | zinc finger protein 92                                          | ENST00000450302 | 0,646547592 |
| A_21_P0006484 | TCONS_00017146  | XLOC_007938    |                                                                 |                 | 0,646518393 |
| A_23_P167789  | NM_016605       | FAM53C         | family with sequence similarity 53, member C                    | ENST00000239906 | 0,646509664 |
| A_21_P0013734 | ENST00000428958 | XLOC_I2_015288 |                                                                 | ENST00000428958 | 0,646417416 |
| A_23_P101811  | NM_021030       | ZNF14          | zinc finger protein 14                                          | ENST00000344099 | 0,646342863 |
| A_33_P3215906 | NM_001039703    | NBPF10         | neuroblastoma breakpoint family, member 10                      | ENST00000414710 | 0,646269127 |
| A_23_P420334  | NM_152595       | PGBD4          | piggyBac transposable element derived 4                         | ENST00000397766 | 0,646139246 |
| A_23_P206612  | NM_020718       | USP31          | ubiquitin specific peptidase 31                                 | ENST00000381162 | 0,646130141 |
| A_21_P0014420 | XR_109701       | LOC100506503   | uncharacterized LOC100506503                                    |                 | 0,645828265 |
| A_23_P250813  | NM_000553       | WRN            | Werner syndrome, RecQ helicase-like                             | ENST00000521620 | 0,64577162  |
| A_33_P3308626 | NM_014940       | MON1B          | MON1 homolog B (yeast)                                          | ENST00000320859 | 0,645759336 |
| A_21_P0009674 | ENST00000426213 | XLOC_013405    |                                                                 | ENST00000426213 | 0,645642864 |
| A_21_P0002315 | TCONS_00003936  | XLOC_001749    |                                                                 |                 | 0,64538625  |
| A_21_P0008290 | NR_038970       | LOC283624      | uncharacterized LOC283624                                       | ENST00000555688 | 0,645136814 |
| A_23_P10025   | NM_006159       | NELL2          | NEL-like 2 (chicken)                                            | ENST00000437801 | 0,645086876 |
| A_33_P3230350 | NM_001098507    | ZNF207         | zinc finger protein 207                                         | ENST00000394673 | 0,644981798 |
| A_33_P3308481 | NR_002768       | HYMAI          | hydatidiform mole associated and imprinted (non-protein coding) |                 | 0,644968283 |
| A_23_P152583  | NM_001042573    | ENGASE         | endo-beta-N-acetylglucosaminidase                               | ENST00000300682 | 0,6448545   |
| A_23_P42935   | NM_004333       | BRAF           | v-raf murine sarcoma viral oncogene homolog B1                  | ENST00000497784 | 0,644706973 |
| A_23_P205789  | NM_002041       | GABPB1         | GA binding protein transcription factor, beta subunit 1         | ENST00000429662 | 0,644620539 |
| A_33_P3241021 | ENST00000416624 | CD69           | CD69 molecule                                                   | ENST00000416624 | 0,644273839 |
| A_23_P335495  | NM_001001891    | ANO7           | anoctamin 7                                                     | ENST00000487192 | 0,643839698 |
| A_23_P111657  | NM_000193       | SHH            | sonic hedgehog                                                  | ENST00000297261 | 0,643675797 |
| A_24_P303420  | NR_026938       | LOC221442      | adenylate cyclase 10 (soluble) pseudogene                       |                 | 0,643557093 |
| A_33_P3211268 | ENST00000334588 | GPATCH4        | G patch domain containing 4                                     | ENST00000334588 | 0,64333316  |
| A_23_P335239  | NM_207123       | GAB1           | GRB2-associated binding protein 1                               | ENST00000262994 | 0,643317616 |

|               |                                 |              |                                                       |                 |             |
|---------------|---------------------------------|--------------|-------------------------------------------------------|-----------------|-------------|
| A_33_P3311145 | NM_014956                       | CEP164       | centrosomal protein 164kDa                            | ENST00000375253 | 0,643199886 |
| A_33_P3408137 | AK124216                        | LOC100130248 | uncharacterized LOC100130248                          |                 | 0,643063207 |
| A_33_P3388453 | NM_001029861                    | NANOS2       | nanos homolog 2 (Drosophila)                          | ENST00000341294 | 0,643029261 |
| A_33_P3407990 | AK096102                        | LOC100130193 | uncharacterized LOC100130193                          |                 | 0,642871675 |
| A_21_P0011671 | TCONS_I2_0001227:XLOC_I2_006578 |              |                                                       |                 | 0,642692219 |
| A_33_P3258923 | NM_005664                       | MKRN3        | makorin ring finger protein 3                         | ENST00000314520 | 0,642691581 |
| A_21_P0006468 | ENST00000456072                 | XLOC_008252  |                                                       | ENST00000456072 | 0,642645286 |
| A_24_P128312  | NM_007135                       | ZNF79        | zinc finger protein 79                                | ENST00000543471 | 0,642604177 |
| A_21_P0014204 | ENST00000419211                 | LOC100506957 |                                                       | ENST00000419211 | 0,642567467 |
| A_23_P128940  | NM_024558                       | METTL21D     | methyltransferase like 21D                            | ENST00000484763 | 0,642340803 |
| A_21_P0003698 | TCONS_00008376                  | XLOC_003829  |                                                       |                 | 0,642147327 |
| A_23_P42935   | NM_004333                       | BRAF         | v-raf murine sarcoma viral oncogene homolog B1        | ENST00000497784 | 0,641852606 |
| A_33_P3485760 | ENST00000462527                 | EIF3A        | eukaryotic translation initiation factor 3, subunit A | ENST00000462527 | 0,64168055  |
| A_33_P3289476 | AK124043                        | LOC100128697 | uncharacterized LOC100128697                          |                 | 0,641629372 |
| A_21_P0008097 | TCONS_00021863                  | XLOC_010457  |                                                       |                 | 0,641592579 |
| A_23_P103837  | NM_001127320                    | UBAP2L       | ubiquitin associated protein 2-like                   | ENST00000475373 | 0,641489075 |
| A_23_P114405  | NM_012286                       | MORF4L2      | mortality factor 4 like 2                             | ENST00000423833 | 0,641453047 |
| A_23_P101811  | NM_021030                       | ZNF14        | zinc finger protein 14                                | ENST00000344099 | 0,641278632 |
| A_23_P250813  | NM_000553                       | WRN          | Werner syndrome, RecQ helicase-like                   | ENST00000521620 | 0,641214207 |
| A_24_P481783  | NM_001163692                    | UBAP1L       | ubiquitin associated protein 1-like                   | ENST00000502113 | 0,641144037 |
| A_23_P53267   | NM_023012                       | RSRC2        | arginine/serine-rich coiled-coil 2                    | ENST00000532695 | 0,641081646 |
| A_23_P101811  | NM_021030                       | ZNF14        | zinc finger protein 14                                | ENST00000344099 | 0,64091473  |
| A_33_P3263569 | NM_152763                       | AKNAD1       | AKNA domain containing 1                              | ENST00000474186 | 0,640878918 |
| A_23_P250813  | NM_000553                       | WRN          | Werner syndrome, RecQ helicase-like                   | ENST00000521620 | 0,64087133  |
| A_23_P146134  | NM_024025                       | DUSP26       | dual specificity phosphatase 26 (putative)            | ENST00000256261 | 0,640649006 |
| A_21_P0000369 | NR_003035                       | SNORA16A     | small nucleolar RNA, H/ACA box 16A                    |                 | 0,64064478  |
| A_24_P258955  | NM_020933                       | ZNF317       | zinc finger protein 317                               | ENST00000247956 | 0,640626868 |
| A_33_P3277753 | NM_144994                       | ANKRD23      | ankyrin repeat domain 23                              | ENST00000331001 | 0,640580464 |
| A_21_P0005172 | THC2631844                      | XLOC_005764  |                                                       |                 | 0,640565199 |

|                |                 |             |                                                               |                 |             |
|----------------|-----------------|-------------|---------------------------------------------------------------|-----------------|-------------|
| A_32_P80245    | NM_001109809    | ZFP57       | zinc finger protein 57 homolog (mouse)                        | ENST00000376881 | 0,640559247 |
| A_23_P114405   | NM_012286       | MORF4L2     | mortality factor 4 like 2                                     | ENST00000423833 | 0,640206854 |
| A_21_P0009721  | TCONS_00027012  | XLOC_013057 |                                                               |                 | 0,640176264 |
| A_19_P00320796 | NR_002323       | TUG1        |                                                               |                 | 0,640105687 |
| A_23_P5611     | NM_018151       | RIF1        | RAP1 interacting factor homolog (yeast)                       | ENST00000430328 | 0,640057939 |
| A_23_P77756    | NM_003857       | GALR2       | galanin receptor 2                                            | ENST00000329003 | 0,64005278  |
| A_21_P0000298  | NR_002916       | SNORD8      | small nucleolar RNA, C/D box 8                                |                 | 0,639925385 |
| A_19_P00319177 | NR_038889       | LOC401320   | uncharacterized LOC401320                                     | ENST00000426529 | 0,639912952 |
| A_21_P0005130  | TCONS_00012595  | XLOC_005458 |                                                               |                 | 0,6398683   |
| A_21_P0007331  | TCONS_00019599  | XLOC_009402 |                                                               |                 | 0,639867954 |
| A_23_P106737   | NM_201412       | LUC7L       | LUC7-like ( <i>S. cerevisiae</i> )                            | ENST00000418978 | 0,639753502 |
| A_23_P1473     | NM_005041       | PRF1        | perforin 1 (pore forming protein)                             | ENST00000441259 | 0,639602962 |
| A_21_P0000581  | NR_029388       | LOC728407   | poly (ADP-ribose) glycohydrolase pseudogene                   | ENST00000415340 | 0,63938919  |
| A_23_P206140   | NM_018602       | DNAJA4      | DnaJ (Hsp40) homolog, subfamily A, member 4                   | ENST00000394852 | 0,63904008  |
| A_23_P103661   | NM_139118       | YY1AP1      | YY1 associated protein 1                                      | ENST00000535662 | 0,638766753 |
| A_33_P3395823  | NM_172109       | KCNQ2       | potassium voltage-gated channel, KQT-like subfamily, mem      | ENST00000344425 | 0,638715276 |
| A_33_P3413523  | NM_006716       | DBF4        | DBF4 homolog ( <i>S. cerevisiae</i> )                         | ENST00000430279 | 0,638689768 |
| A_32_P179138   | NM_001130683    | GUCY1A3     | guanylate cyclase 1, soluble, alpha 3                         |                 | 0,637965382 |
| A_33_P3337026  | ENST00000328897 | SLC6A8      | solute carrier family 6 (neurotransmitter transporter, creati | ENST00000328897 | 0,637670482 |
| A_21_P0002587  | TCONS_00004747  | XLOC_001426 |                                                               |                 | 0,637584976 |
| A_23_P112412   | NM_017746       | TEX10       | testis expressed 10                                           | ENST00000444730 | 0,637566575 |
| A_33_P3542599  | CV322587        | SNORA2A     | small nucleolar RNA, H/ACA box 2A                             |                 | 0,637472385 |
| A_21_P0001817  | ENST00000417930 | XLOC_001331 |                                                               | ENST00000417930 | 0,637367628 |
| A_24_P128145   | NM_001880       | ATF2        | activating transcription factor 2                             | ENST00000435231 | 0,637313653 |
| A_24_P93896    | NM_199077       | CNNM2       | cyclin M2                                                     | ENST00000369875 | 0,637137358 |
| A_21_P0012222  | BC036580        | C21orf81    | ankyrin repeat domain 20 family, member A3 pseudogene         |                 | 0,637002553 |
| A_33_P3301752  | XR_108277       | FLJ21369    | uncharacterized protein FLJ21369                              |                 | 0,636831912 |
| A_21_P0014007  | ENST00000451672 | C9orf133    | chromosome 9 open reading frame 133                           | ENST00000451672 | 0,636516167 |
| A_33_P3223208  | NM_016122       | CCDC41      | coiled-coil domain containing 41                              | ENST00000397807 | 0,636466512 |



|                |                  |                |                                                             |                 |             |
|----------------|------------------|----------------|-------------------------------------------------------------|-----------------|-------------|
| A_23_P103837   | NM_001127320     | UBAP2L         | ubiquitin associated protein 2-like                         | ENST00000475373 | 0,636427597 |
| A_23_P44155    | NM_198196        | CD96           | CD96 molecule                                               | ENST00000283285 | 0,636317029 |
| A_21_P0008623  | THC2626981       | XLOC_011223    |                                                             |                 | 0,636295396 |
| A_33_P3346866  | NM_017822        | KANSL2         | KAT8 regulatory NSL complex subunit 2                       | ENST00000420613 | 0,636119587 |
| A_33_P3357337  | BC026272         | CCNC           | cyclin C                                                    | ENST00000482541 | 0,636108413 |
| A_33_P3335740  | NR_026891        | FLJ10038       | uncharacterized protein FLJ10038                            |                 | 0,636036096 |
| A_19_P00317360 | NM_001199182     | ATP2C1         |                                                             | ENST00000533801 | 0,635877608 |
| A_23_P132845   | NM_004366        | CLCN2          | chloride channel 2                                          | ENST00000430397 | 0,635820393 |
| A_24_P357536   | NM_001190274     | FBXO11         | F-box protein 11                                            | ENST00000378314 | 0,635764297 |
| A_33_P3305620  | NM_001184717     | TIPARP         | TCDD-inducible poly(ADP-ribose) polymerase                  | ENST00000461166 | 0,635755379 |
| A_21_P0008911  | TCONS_00024348   | XLOC_011670    |                                                             |                 | 0,63562035  |
| A_33_P3267463  | ENST00000381984  | RFX3           | regulatory factor X, 3 (influences HLA class II expression) | ENST00000381984 | 0,635606038 |
| A_23_P334870   | NM_145316        | TMEM217        | transmembrane protein 217                                   | ENST00000336655 | 0,635541201 |
| A_23_P355993   | NM_025040        | ZNF614         | zinc finger protein 614                                     | ENST00000356322 | 0,63528369  |
| A_24_P404487   | AL136548         | ZNF506         | zinc finger protein 506                                     |                 | 0,63487563  |
| A_24_P192627   | NM_004529        | MLLT3          | myeloid/lymphoid or mixed-lineage leukemia (trithorax hor   | ENST00000380323 | 0,634497436 |
| A_33_P3420442  | NM_001039803     | CDK20          | cyclin-dependent kinase 20                                  | ENST00000375871 | 0,634307858 |
| A_23_P114405   | NM_012286        | MORF4L2        | mortality factor 4 like 2                                   | ENST00000423833 | 0,634052441 |
| A_23_P103503   | NM_002393        | MDM4           | Mdm4 p53 binding protein homolog (mouse)                    | ENST00000391947 | 0,633989131 |
| A_33_P3278951  | NM_033512        | TSPYL5         | TSPY-like 5                                                 | ENST00000322128 | 0,633879989 |
| A_21_P0000340  | NR_002986        | SNORA60        | small nucleolar RNA, H/ACA box 60                           |                 | 0,633845521 |
| A_33_P3410981  | NM_032101        | PCDHGB7        | protocadherin gamma subfamily B, 7                          | ENST00000398594 | 0,633795727 |
| A_21_P0013826  | TCONS_I2_0003055 | XLOC_I2_015773 |                                                             |                 | 0,63375464  |
| A_23_P338495   | NM_001002265     | Mar-08         | membrane-associated ring finger (C3HC4) 8                   | ENST00000476962 | 0,633658174 |
| A_21_P0012756  | THC2779149       | XLOC_I2_010926 |                                                             |                 | 0,633472045 |
| A_33_P3462960  | NM_006260        | DNAJC3         | DnaJ (Hsp40) homolog, subfamily C, member 3                 | ENST00000376795 | 0,633471777 |
| A_23_P250813   | NM_000553        | WRN            | Werner syndrome, RecQ helicase-like                         | ENST00000521620 | 0,633272761 |
| A_23_P119196   | NM_016270        | KLF2           | Kruppel-like factor 2 (lung)                                | ENST00000248071 | 0,633189614 |
| A_23_P26570    | NM_144676        | TMED6          | transmembrane emp24 protein transport domain containin      | ENST00000288025 | 0,633174454 |

|               |                  |                |                                                              |                 |             |
|---------------|------------------|----------------|--------------------------------------------------------------|-----------------|-------------|
| A_23_P112950  | NM_018179        | ATF7IP         | activating transcription factor 7 interacting protein        | ENST00000540793 | 0,633116238 |
| A_33_P3266410 | NM_002383        | MAZ            | MYC-associated zinc finger protein (purine-binding transcrip | ENST00000545521 | 0,632749448 |
| A_32_P92281   | NR_028058        | LOC100132832   | PMS2 postmeiotic segregation increased 2 (S. cerevisiae) ps  | ENST00000447643 | 0,632691058 |
| A_23_P114405  | NM_012286        | MORF4L2        | mortality factor 4 like 2                                    | ENST00000423833 | 0,632580868 |
| A_23_P250813  | NM_000553        | WRN            | Werner syndrome, RecQ helicase-like                          | ENST00000521620 | 0,632415429 |
| A_21_P0014798 | XR_132599        | LOC100128108   | uncharacterized LOC100128108                                 |                 | 0,632284171 |
| A_21_P0001593 | BC041976         | XLOC_001072    |                                                              |                 | 0,632276943 |
| A_33_P3417920 | NM_003886        | AKAP4          | A kinase (PRKA) anchor protein 4                             | ENST00000376064 | 0,632138865 |
| A_24_P101047  | NM_020931        | KIAA1586       | KIAA1586                                                     | ENST00000545356 | 0,631848868 |
| A_24_P366122  | NM_024722        | ACBD4          | acyl-CoA binding domain containing 4                         | ENST00000376955 | 0,631649168 |
| A_21_P0005453 | TCONS_00013655   | XLOC_006312    |                                                              |                 | 0,631560622 |
| A_23_P502957  | NM_021810        | CDH26          | cadherin 26                                                  | ENST00000348616 | 0,631549434 |
| A_23_P82975   | NM_181661        | VPS13B         | vacuolar protein sorting 13 homolog B (yeast)                | ENST00000441350 | 0,631535033 |
| A_23_P128166  | NM_014999        | RAB21          | RAB21, member RAS oncogene family                            | ENST00000261263 | 0,631521815 |
| A_21_P0012281 | ENST00000425895  | XLOC_I2_009456 |                                                              | ENST00000425895 | 0,63141763  |
| A_33_P3419785 | NM_004052        | BNIP3          | BCL2/adenovirus E1B 19kDa interacting protein 3              | ENST00000368636 | 0,631388947 |
| A_23_P125204  | NM_001004464     | OR10G8         | olfactory receptor, family 10, subfamily G, member 8         | ENST00000431524 | 0,631231149 |
| A_33_P3252809 | ENST00000405673  | FAM118A        | family with sequence similarity 118, member A                | ENST00000405673 | 0,631150944 |
| A_21_P0000389 | NR_003073        | SNORD91B       | small nucleolar RNA, C/D box 91B                             |                 | 0,631139257 |
| A_33_P3331085 | NM_021982        | SEC24A         | SEC24 family, member A (S. cerevisiae)                       | ENST00000398844 | 0,631126616 |
| A_23_P88303   | NM_021979        | HSPA2          | heat shock 70kDa protein 2                                   | ENST00000247207 | 0,631113519 |
| A_21_P0002637 | BX116142         | XLOC_001933    |                                                              |                 | 0,631064018 |
| A_33_P3390570 | NM_005933        | MLL            | myeloid/lymphoid or mixed-lineage leukemia (trithorax hor    | ENST00000389507 | 0,631015184 |
| A_21_P0009748 | TCONS_00027240   | XLOC_013274    |                                                              |                 | 0,631007685 |
| A_32_P361185  | NM_001024593     | ZMYND17        | zinc finger, MYND-type containing 17                         | ENST00000372912 | 0,631007403 |
| A_23_P119196  | NM_016270        | KLF2           | Kruppel-like factor 2 (lung)                                 | ENST00000248071 | 0,630799189 |
| A_33_P3308446 | NM_004040        | RHOB           | ras homolog gene family, member B                            | ENST00000272233 | 0,630714796 |
| A_21_P0012269 | TCONS_I2_0001773 | XLOC_I2_009358 |                                                              |                 | 0,630562758 |
| A_23_P112950  | NM_018179        | ATF7IP         | activating transcription factor 7 interacting protein        | ENST00000540793 | 0,630501189 |

|               |                 |                |                                                          |                 |             |
|---------------|-----------------|----------------|----------------------------------------------------------|-----------------|-------------|
| A_33_P3265394 | ENST00000538098 | WDR74          | WD repeat domain 74                                      | ENST00000538098 | 0,630378474 |
| A_21_P0000382 | NR_003059       | SNORD71        | small nucleolar RNA, C/D box 71                          |                 | 0,630359628 |
| A_33_P3238230 | ENST00000506396 | CDH6           | cadherin 6, type 2, K-cadherin (fetal kidney)            | ENST00000506396 | 0,63034437  |
| A_21_P0005187 | TCONS_00012836  | XLOC_005944    |                                                          |                 | 0,63022131  |
| A_21_P0012437 | NM_014831       | TRANK1         | tetratricopeptide repeat and ankyrin repeat containing 1 | ENST00000513141 | 0,629985183 |
| A_23_P250813  | NM_000553       | WRN            | Werner syndrome, RecQ helicase-like                      | ENST00000521620 | 0,629811996 |
| A_23_P103503  | NM_002393       | MDM4           | Mdm4 p53 binding protein homolog (mouse)                 | ENST00000391947 | 0,629787292 |
| A_23_P250813  | NM_000553       | WRN            | Werner syndrome, RecQ helicase-like                      | ENST00000521620 | 0,629784366 |
| A_33_P3677061 | XR_132607       | LOC283887      | uncharacterized LOC283887                                |                 | 0,62975164  |
| A_24_P303874  | XR_109856       | C9orf62        | chromosome 9 open reading frame 62                       | ENST00000320778 | 0,629619532 |
| A_33_P3318292 | NM_005066       | SFPQ           | splicing factor proline/glutamine-rich                   | ENST00000357214 | 0,629437323 |
| A_21_P0012569 | THC2568011      | XLOC_I2_010568 |                                                          |                 | 0,628938745 |
| A_23_P105545  | NM_016830       | VAMP1          | vesicle-associated membrane protein 1 (synaptobrevin 1)  | ENST00000535927 | 0,628815648 |
| A_21_P0010415 | TCONS_00029589  | XLOC_014226    |                                                          |                 | 0,628430657 |
| A_33_P3291349 | ENST00000319040 | RPRD1A         | regulation of nuclear pre-mRNA domain containing 1A      | ENST00000319040 | 0,62838316  |
| A_23_P114405  | NM_012286       | MORF4L2        | mortality factor 4 like 2                                | ENST00000423833 | 0,628253635 |
| A_33_P3349414 | NM_014007       | ZBTB43         | zinc finger and BTB domain containing 43                 | ENST00000373464 | 0,628248084 |
| A_23_P103837  | NM_001127320    | UBAP2L         | ubiquitin associated protein 2-like                      | ENST00000475373 | 0,628072344 |
| A_23_P171074  | NM_004867       | ITM2A          | integral membrane protein 2A                             | ENST00000469541 | 0,628000395 |
| A_21_P0004305 | TCONS_00010106  | XLOC_004574    |                                                          |                 | 0,627911768 |
| A_21_P0000224 | NR_000027       | SNORD83A       | small nucleolar RNA, C/D box 83A                         |                 | 0,62777911  |
| A_33_P3358712 | NR_027390       | POLR2M         | polymerase (RNA) II (DNA directed) polypeptide M         | ENST00000464277 | 0,627512541 |
| A_33_P3365652 | ENST00000480955 | UBA5           | ubiquitin-like modifier activating enzyme 5              | ENST00000480955 | 0,627480603 |
| A_33_P3376434 | NM_001080517    | SETD5          | SET domain containing 5                                  | ENST00000492939 | 0,627189641 |
| A_23_P114405  | NM_012286       | MORF4L2        | mortality factor 4 like 2                                | ENST00000423833 | 0,627146728 |
| A_23_P116890  | NM_006249       | PRB3           | proline-rich protein BstNI subfamily 3                   | ENST00000538488 | 0,627034629 |
| A_21_P0000258 | NR_002564       | SNORD26        | small nucleolar RNA, C/D box 26                          |                 | 0,626894708 |
| A_23_P111724  | NM_138290       | RUNDC3B        | RUN domain containing 3B                                 | ENST00000493037 | 0,626856883 |
| A_23_P154065  | NM_006000       | TUBA4A         | tubulin, alpha 4a                                        | ENST00000248437 | 0,626778216 |

|               |                  |                |                                                             |  |                 |             |
|---------------|------------------|----------------|-------------------------------------------------------------|--|-----------------|-------------|
| A_21_P0008821 | TCONS_00023909   | XLOC_011201    |                                                             |  |                 | 0,62675999  |
| A_23_P331049  | NM_006426        | DPYSL4         | dihydropyrimidinase-like 4                                  |  | ENST00000338492 | 0,626732871 |
| A_23_P103361  | NM_005356        | LCK            | lymphocyte-specific protein tyrosine kinase                 |  | ENST00000469765 | 0,62659879  |
| A_33_P3411328 | NR_034151        | LOC730227      | uncharacterized LOC730227                                   |  |                 | 0,626541098 |
| A_21_P0000348 | NR_002996        | SNORA80        | small nucleolar RNA, H/ACA box 80                           |  |                 | 0,626511645 |
| A_23_P415558  | NM_012256        | ZNF212         | zinc finger protein 212                                     |  | ENST00000335870 | 0,62644964  |
| A_21_P0002232 | TCONS_00003718   | XLOC_001506    |                                                             |  |                 | 0,626346336 |
| A_21_P0004703 | ENST00000446476  | XLOC_005530    |                                                             |  | ENST00000446476 | 0,626337332 |
| A_23_P10025   | NM_006159        | NELL2          | NEL-like 2 (chicken)                                        |  | ENST00000437801 | 0,626016978 |
| A_24_P48248   | NM_024032        | C17orf53       | chromosome 17 open reading frame 53                         |  | ENST00000245382 | 0,625911912 |
| A_24_P295330  | NM_139246        | TSTD2          | thiosulfate sulfurtransferase (rhodanese)-like domain conta |  | ENST00000354801 | 0,625896179 |
| A_24_P298495  | AF289590         | LOC100130744   | uncharacterized LOC100130744                                |  |                 | 0,625777407 |
| A_23_P502627  | NM_007156        | ZXDA           | zinc finger, X-linked, duplicated A                         |  | ENST00000358697 | 0,625728426 |
| A_33_P3415087 | NM_001127899     | CLCN5          | chloride channel 5                                          |  | ENST00000376088 | 0,625724338 |
| A_33_P3402474 | NM_001031722     | ATAT1          | alpha tubulin acetyltransferase 1                           |  | ENST00000376478 | 0,625639717 |
| A_23_P112412  | NM_017746        | TEX10          | testis expressed 10                                         |  | ENST00000444730 | 0,62563851  |
| A_33_P3470781 | NM_020343        | RALGAPA2       | Ral GTPase activating protein, alpha subunit 2 (catalytic)  |  | ENST00000202677 | 0,625533346 |
| A_21_P0013894 | TCONS_I2_0003092 | XLOC_I2_015938 |                                                             |  |                 | 0,62553202  |
| A_23_P128372  | NM_002014        | FKBP4          | FK506 binding protein 4, 59kDa                              |  | ENST00000001008 | 0,6254249   |
| A_21_P0003097 | AL832729         | XLOC_003021    |                                                             |  | ENST00000412804 | 0,625359139 |
| A_33_P3256695 | NM_017892        | PRPF40A        | PRP40 pre-mRNA processing factor 40 homolog A (S. cerevi    |  | ENST00000410080 | 0,625339668 |
| A_24_P98762   | NM_002716        | PPP2R1B        | protein phosphatase 2, regulatory subunit A, beta           |  | ENST00000527614 | 0,625169715 |
| A_33_P3326447 | XM_003119544     | LOC100508384   | uncharacterized LOC100508384                                |  |                 | 0,625127914 |
| A_21_P0013042 | TCONS_I2_0002445 | XLOC_I2_012748 |                                                             |  |                 | 0,624951561 |
| A_21_P0011888 | AA299779         | XLOC_I2_007832 |                                                             |  |                 | 0,624825065 |
| A_23_P103837  | NM_001127320     | UBAP2L         | ubiquitin associated protein 2-like                         |  | ENST00000475373 | 0,624823778 |
| A_21_P0001031 | ENST00000456125  | XLOC_000471    |                                                             |  | ENST00000456125 | 0,624799876 |
| A_23_P34396   | NM_020317        | C1orf63        | chromosome 1 open reading frame 63                          |  | ENST00000431849 | 0,624797293 |
| A_24_P88266   | NM_002763        | PROX1          | prospero homeobox 1                                         |  | ENST00000498508 | 0,624777801 |

|               |                  |                |                                                          |                 |             |
|---------------|------------------|----------------|----------------------------------------------------------|-----------------|-------------|
| A_33_P3255131 | NM_001100915     | KCTD19         | potassium channel tetramerisation domain containing 19   | ENST00000304372 | 0,624730334 |
| A_33_P3375528 | NM_152622        | MIER3          | mesoderm induction early response 1, family member 3     | ENST00000451637 | 0,624641538 |
| A_23_P103837  | NM_001127320     | UBAP2L         | ubiquitin associated protein 2-like                      | ENST00000475373 | 0,624631248 |
| A_33_P3351207 | NR_015363        | MGC21881       | uncharacterized locus MGC21881                           | ENST00000467494 | 0,624348102 |
| A_23_P429535  | NM_012086        | GTF3C3         | general transcription factor IIIC, polypeptide 3, 102kDa | ENST00000263956 | 0,62427863  |
| A_21_P0009393 | TCONS_00025963   | XLOC_012281    |                                                          |                 | 0,624275858 |
| A_21_P0012385 | TCONS_I2_0001871 | XLOC_I2_009804 |                                                          |                 | 0,624047194 |
| A_33_P3324651 | NM_001242600     | RBM39          | RNA binding motif protein 39                             | ENST00000433027 | 0,624038813 |
| A_23_P114405  | NM_012286        | MORF4L2        | mortality factor 4 like 2                                | ENST00000423833 | 0,623737155 |
| A_23_P42935   | NM_004333        | BRAF           | v-raf murine sarcoma viral oncogene homolog B1           | ENST00000497784 | 0,623672466 |
| A_21_P0003748 | THC2633082       | XLOC_003993    |                                                          |                 | 0,623579289 |
| A_33_P3269728 | NM_017664        | ANKRD10        | ankyrin repeat domain 10                                 | ENST00000460846 | 0,623229717 |
| A_21_P0011304 | TCONS_I2_0000849 | XLOC_I2_004596 |                                                          |                 | 0,623162457 |
| A_23_P424126  | NM_014594        | ZNF354C        | zinc finger protein 354C                                 | ENST00000315475 | 0,623062802 |
| A_21_P0014189 | XR_108778        | LOC100507042   | uncharacterized LOC100507042                             |                 | 0,62282046  |
| A_23_P103503  | NM_002393        | MDM4           | Mdm4 p53 binding protein homolog (mouse)                 | ENST00000391947 | 0,622811316 |
| A_21_P0002156 | TCONS_00003535   | XLOC_001309    |                                                          |                 | 0,622433584 |
| A_33_P3270623 | NM_175885        | FAM181B        | family with sequence similarity 181, member B            | ENST00000329203 | 0,622414782 |
| A_23_P305033  | NM_152787        | TAB3           | TGF-beta activated kinase 1/MAP3K7 binding protein 3     | ENST00000288422 | 0,622391464 |
| A_23_P215132  | NM_014149        | WDR91          | WD repeat domain 91                                      | ENST00000466182 | 0,62235923  |
| A_23_P112412  | NM_017746        | TEX10          | testis expressed 10                                      | ENST00000444730 | 0,622316838 |
| A_21_P0013373 | ENST00000446399  | XLOC_I2_013302 |                                                          | ENST00000446399 | 0,622091448 |
| A_33_P3277943 | NM_144571        | CNOT6L         | CCR4-NOT transcription complex, subunit 6-like           | ENST00000504123 | 0,622084813 |
| A_24_P51588   | NM_030937        | CCNL2          | cyclin L2                                                | ENST00000488340 | 0,622038118 |
| A_21_P0006553 | TCONS_00017386   | XLOC_008256    |                                                          |                 | 0,621965195 |
| A_23_P118042  | NM_018296        | LRRC36         | leucine rich repeat containing 36                        | ENST00000290940 | 0,621766619 |
| A_33_P3258127 | AY203946         | LOC100132188   | LP7097                                                   |                 | 0,621683079 |
| A_33_P3300635 | NM_006212        | PFKFB2         | 6-phosphofructo-2-kinase/fructose-2,6-biphosphatase 2    | ENST00000367080 | 0,62159205  |
| A_23_P88489   | NM_172095        | CATSPER2       | cation channel, sperm associated 2                       | ENST00000433380 | 0,621567928 |



|               |                  |                |                                                          |                 |             |
|---------------|------------------|----------------|----------------------------------------------------------|-----------------|-------------|
| A_24_P93754   | NM_001146694     | KDM4C          | lysine (K)-specific demethylase 4C                       | ENST00000381306 | 0,621511832 |
| A_23_P8640    | NM_001039966     | GPER           | G protein-coupled estrogen receptor 1                    | ENST00000508834 | 0,621213095 |
| A_23_P140614  | NR_038843        | LOC653061      | golgin A8 family, member B pseudogene                    | ENST00000448387 | 0,621154894 |
| A_33_P3307490 | ENST00000378189  | SYNRG          | synergin, gamma                                          | ENST00000378189 | 0,62113128  |
| A_32_P468341  | NM_001170754     | C1orf127       | chromosome 1 open reading frame 127                      | ENST00000518410 | 0,620777918 |
| A_23_P347029  | NM_176890        | TAS2R50        | taste receptor, type 2, member 50                        | ENST00000506868 | 0,620542303 |
| A_23_P105545  | NM_016830        | VAMP1          | vesicle-associated membrane protein 1 (synaptobrevin 1)  | ENST00000535927 | 0,620530787 |
| A_33_P3315475 | NM_001080435     | WHAMM          | WAS protein homolog associated with actin, golgi membrar | ENST00000234505 | 0,620506435 |
| A_23_P38346   | NM_024119        | DHX58          | DEXH (Asp-Glu-X-His) box polypeptide 58                  | ENST00000423748 | 0,620148468 |
| A_23_P311713  | NM_173572        | C10orf93       | chromosome 10 open reading frame 93                      | ENST00000368585 | 0,620129643 |
| A_33_P3601202 | NR_036676        | IFNA22P        | interferon, alpha 22, pseudogene                         |                 | 0,620022857 |
| A_21_P0007325 | THC2788642       | XLOC_009389    |                                                          |                 | 0,619873262 |
| A_23_P91095   | NM_006139        | CD28           | CD28 molecule                                            | ENST00000374481 | 0,619835784 |
| A_33_P3368950 | NM_001161546     | C5orf65        | chromosome 5 open reading frame 65                       | ENST00000434752 | 0,619823881 |
| A_21_P0012441 | ENST00000463764  | TRANK1         | tetratricopeptide repeat and ankyrin repeat containing 1 | ENST00000463764 | 0,619696567 |
| A_33_P3368771 | NR_026991        | H1FX-AS1       | H1FX antisense RNA 1 (non-protein coding)                | ENST00000511998 | 0,619606624 |
| A_23_P111303  | NM_014892        | SCAF8          | SR-related CTD-associated factor 8                       | ENST00000417268 | 0,619575714 |
| A_21_P0008202 | XR_109147        | DNAJC3-AS1     | DNAJC3 antisense RNA 1 (non-protein coding)              |                 | 0,619551025 |
| A_21_P0006692 | ENST00000428940  | XLOC_008542    |                                                          | ENST00000428940 | 0,619479655 |
| A_33_P3307144 | NM_021956        | GRIK2          | glutamate receptor, ionotropic, kainate 2                | ENST00000487161 | 0,619428886 |
| A_23_P347508  | NM_023077        | SELRC1         | Sel1 repeat containing 1                                 | ENST00000371538 | 0,619422001 |
| A_21_P0007235 | TCONS_00019383   | XLOC_009207    |                                                          |                 | 0,619416164 |
| A_32_P38637   | NM_032534        | KRBA1          | KRAB-A domain containing 1                               | ENST00000466546 | 0,61933323  |
| A_23_P103661  | NM_139118        | YY1AP1         | YY1 associated protein 1                                 | ENST00000535662 | 0,619296692 |
| A_21_P0011621 | TCONS_I2_0001155 | XLOC_I2_005759 |                                                          |                 | 0,619289764 |
| A_21_P0013166 | ENST00000510017  | XLOC_I2_013242 |                                                          | ENST00000510017 | 0,619145302 |
| A_24_P9671    | NM_001539        | DNAJA1         | DnaJ (Hsp40) homolog, subfamily A, member 1              | ENST00000495015 | 0,619081478 |
| A_33_P3214785 | AK094801         | LEPROT         | leptin receptor overlapping transcript                   |                 | 0,619056716 |
| A_23_P112950  | NM_018179        | ATF7IP         | activating transcription factor 7 interacting protein    | ENST00000540793 | 0,618886227 |

|                |                |               |                                                       |                 |             |
|----------------|----------------|---------------|-------------------------------------------------------|-----------------|-------------|
| A_24_P239076   | NM_020070      | IGLL1         | immunoglobulin lambda-like polypeptide 1              | ENST00000330377 | 0,618786211 |
| A_23_P16242    | NM_021143      | ZNF20         | zinc finger protein 20                                | ENST00000430024 | 0,61873971  |
| A_23_P8754     | NM_005763      | AASS          | aminoadipate-semialdehyde synthase                    | ENST00000358954 | 0,618652928 |
| A_23_P111929   | NM_016023      | OTUD6B        | OTU domain containing 6B                              | ENST00000524027 | 0,618630273 |
| A_33_P3265679  | XR_112616      | LOC389199     | uncharacterized LOC389199                             | ENST00000429019 | 0,61847316  |
| A_23_P303803   | NM_152474      | C19orf18      | chromosome 19 open reading frame 18                   | ENST00000314391 | 0,618319539 |
| A_23_P103837   | NM_001127320   | UBAP2L        | ubiquitin associated protein 2-like                   | ENST00000475373 | 0,618306803 |
| A_23_P112412   | NM_017746      | TEX10         | testis expressed 10                                   | ENST00000444730 | 0,618261397 |
| A_23_P112950   | NM_018179      | ATF7IP        | activating transcription factor 7 interacting protein | ENST00000540793 | 0,617794202 |
| A_23_P114405   | NM_012286      | MORF4L2       | mortality factor 4 like 2                             | ENST00000423833 | 0,617771558 |
| A_23_P30464    | NM_030567      | PRR7          | proline rich 7 (synaptic)                             | ENST00000502922 | 0,617738535 |
| A_21_P0007888  | DB511330       | XLOC_010172   |                                                       |                 | 0,617663907 |
| A_21_P0000503  | NR_023343      | RNU4ATAC      | RNA, U4atac small nuclear (U12-dependent splicing)    |                 | 0,617319953 |
| A_33_P3284108  | NM_006178      | NSF           | N-ethylmaleimide-sensitive factor                     | ENST00000225282 | 0,617284638 |
| A_23_P72840    | NM_018973      | DPM3          | dolichyl-phosphate mannosyltransferase polypeptide 3  | ENST00000368399 | 0,617220831 |
| A_19_P00318272 | NR_038988      | LOC100287765  |                                                       |                 | 0,616838796 |
| A_33_P3266265  | NM_001025780   | FAM108B1      | family with sequence similarity 108, member B1        | ENST00000333421 | 0,616753372 |
| A_33_P3252630  | NM_203282      | ZNF254        | zinc finger protein 254                               | ENST00000392281 | 0,616748538 |
| A_21_P0002931  | TCONS_00005948 | XLOC_002578   |                                                       |                 | 0,616679662 |
| A_33_P3219459  | NM_001114748   | C1orf70       | chromosome 1 open reading frame 70                    | ENST00000378733 | 0,616584821 |
| A_33_P3336527  | NM_015027      | PDXDC1        | pyridoxal-dependent decarboxylase domain containing 1 | ENST00000325845 | 0,616523435 |
| A_23_P373619   | NM_172139      | IL28B         | interleukin 28B (interferon, lambda 3)                | ENST00000413851 | 0,616182524 |
| A_23_P253317   | NM_013308      | GPR171        | G protein-coupled receptor 171                        | ENST00000309180 | 0,616135578 |
| A_23_P12784    | NM_012083      | FRAT2         | frequently rearranged in advanced T-cell lymphomas 2  | ENST00000371019 | 0,6160429   |
| A_21_P0009462  | TCONS_00026292 | XLOC_012636   |                                                       |                 | 0,616030305 |
| A_33_P3386671  | NM_005060      | RORC          | RAR-related orphan receptor C                         | ENST00000356728 | 0,615961935 |
| A_33_P3464855  | AL050097       | DKFZP586B0319 | DKFZP586B0319 protein                                 |                 | 0,615895601 |
| A_23_P101811   | NM_021030      | ZNF14         | zinc finger protein 14                                | ENST00000344099 | 0,615823881 |
| A_23_P119196   | NM_016270      | KLF2          | Kruppel-like factor 2 (lung)                          | ENST00000248071 | 0,615794545 |

|                |                 |                |                                                              |                 |             |
|----------------|-----------------|----------------|--------------------------------------------------------------|-----------------|-------------|
| A_33_P3303215  | NM_001191009    | SRSF10         | serine/arginine-rich splicing factor 10                      | ENST00000467887 | 0,615659897 |
| A_21_P0010300  | TCONS_00029178  | XLOC_014118    |                                                              |                 | 0,615485816 |
| A_33_P3229370  | NM_001546       | ID4            | inhibitor of DNA binding 4, dominant negative helix-loop-he  | ENST00000378700 | 0,615245186 |
| A_21_P0011546  | EB385853        | XLOC_I2_005804 |                                                              |                 | 0,61509339  |
| A_23_P103361   | NM_005356       | LCK            | lymphocyte-specific protein tyrosine kinase                  | ENST00000469765 | 0,615066974 |
| A_32_P84369    | NM_001079529    | FAM153B        | family with sequence similarity 153, member B                | ENST00000502475 | 0,614814013 |
| A_21_P0000278  | NR_002604       | SNORD10        | small nucleolar RNA, C/D box 10                              |                 | 0,61448372  |
| A_33_P3273324  | ENST00000344085 | ZNF880         | zinc finger protein 880                                      | ENST00000344085 | 0,614409941 |
| A_33_P3299170  | NM_201412       | LUC7L          | LUC7-like ( <i>S. cerevisiae</i> )                           | ENST00000490762 | 0,614369715 |
| A_23_P103276   | NM_138417       | KTI12          | KTI12 homolog, chromatin associated ( <i>S. cerevisiae</i> ) | ENST00000371614 | 0,614084412 |
| A_19_P00320119 | NR_002323       | TUG1           |                                                              |                 | 0,614030538 |
| A_23_P109913   | NM_006564       | CXCR6          | chemokine (C-X-C motif) receptor 6                           | ENST00000438735 | 0,613893672 |
| A_33_P3304516  | NM_021035       | ZNFX1          | zinc finger, NFX1-type containing 1                          | ENST00000371744 | 0,613889349 |
| A_33_P3280157  | NR_001290       | SNORD116-19    | small nucleolar RNA, C/D box 116-19                          | ENST00000549804 | 0,613818309 |
| A_23_P109913   | NM_006564       | CXCR6          | chemokine (C-X-C motif) receptor 6                           | ENST00000438735 | 0,613773869 |
| A_33_P3339066  | NM_017619       | RNPC3          | RNA-binding region (RNP1, RRM) containing 3                  | ENST00000531883 | 0,613766062 |
| A_23_P423074   | NM_015566       | FAM169A        | family with sequence similarity 169, member A                | ENST00000510609 | 0,613723999 |
| A_33_P3415345  | NM_001135745    | ALS2           | amyotrophic lateral sclerosis 2 (juvenile)                   | ENST00000496244 | 0,613704618 |
| A_33_P3527931  | NM_001130514    | C19orf69       | chromosome 19 open reading frame 69                          | ENST00000378187 | 0,613685111 |
| A_19_P00321809 | NR_038889       | LOC401320      | uncharacterized LOC401320                                    | ENST00000434399 | 0,613599036 |
| A_23_P429092   | NM_001145207    | HBS1L          | HBS1-like ( <i>S. cerevisiae</i> )                           | ENST00000367822 | 0,613530232 |
| A_23_P112412   | NM_017746       | TEX10          | testis expressed 10                                          | ENST00000444730 | 0,613494822 |
| A_21_P0002650  | TCONS_00004167  | XLOC_002010    |                                                              |                 | 0,613302223 |
| A_23_P103661   | NM_139118       | YY1AP1         | YY1 associated protein 1                                     | ENST00000535662 | 0,613289868 |
| A_33_P3653330  | NM_003010       | MAP2K4         | mitogen-activated protein kinase kinase 4                    | ENST00000415385 | 0,613136017 |
| A_23_P110699   | NM_052860       | ZNF300         | zinc finger protein 300                                      | ENST00000394226 | 0,613119947 |
| A_33_P3211864  | NR_028407       | ARMCX4         | armadillo repeat containing, X-linked 4                      | ENST00000354842 | 0,613047899 |
| A_33_P3378925  | NM_006328       | RBM14          | RNA binding motif protein 14                                 | ENST00000310137 | 0,613007965 |
| A_32_P22501    | NR_034170       | LOC645212      | uncharacterized LOC645212                                    | ENST00000313807 | 0,612866914 |

|                |                 |              |                                                              |                 |             |
|----------------|-----------------|--------------|--------------------------------------------------------------|-----------------|-------------|
| A_33_P3228872  | NM_014472       | C10orf28     | chromosome 10 open reading frame 28                          | ENST00000314594 | 0,612851411 |
| A_33_P3209581  | NM_001170738    | IQSEC3       | IQ motif and Sec7 domain 3                                   | ENST00000326261 | 0,612825359 |
| A_23_P152970   | NM_016339       | RAPGEFL1     | Rap guanine nucleotide exchange factor (GEF)-like 1          | ENST00000264644 | 0,612816293 |
| A_21_P0011390  | Y10483          | PRKXP1       | protein kinase, X-linked, pseudogene 1                       |                 | 0,61277016  |
| A_32_P146659   | NR_027040       | LOC401431    | uncharacterized LOC401431                                    |                 | 0,612755098 |
| A_33_P3526315  | BC005372        | MGC12488     | uncharacterized protein MGC12488                             |                 | 0,612722928 |
| A_19_P00317447 | ENST00000473756 | XLOC_002736  | 0                                                            | ENST00000473756 | 0,612708669 |
| A_23_P37127    | NM_004496       | FOXA1        | forkhead box A1                                              | ENST00000250448 | 0,612638576 |
| A_23_P76914    | NM_005982       | SIX1         | SIX homeobox 1                                               | ENST00000247182 | 0,612494638 |
| A_21_P0004244  | TCONS_00009933  | XLOC_004361  |                                                              |                 | 0,612398948 |
| A_33_P3356631  | NM_006298       | ZNF192       | zinc finger protein 192                                      |                 | 0,612314784 |
| A_23_P18452    | NM_002416       | CXCL9        | chemokine (C-X-C motif) ligand 9                             | ENST00000264888 | 0,612163134 |
| A_33_P3411388  | NM_001080461    | UNCX         | UNC homeobox                                                 | ENST00000316333 | 0,611987733 |
| A_21_P0011133  | NM_199254       | TPTE2        | transmembrane phosphoinositide 3-phosphatase and tensin      | ENST00000440905 | 0,611964207 |
| A_32_P182388   | NM_021217       | ZNF77        | zinc finger protein 77                                       | ENST00000314531 | 0,61194269  |
| A_33_P3253804  | NM_005195       | CEBPD        | CCAAT/enhancer binding protein (C/EBP), delta                | ENST00000542385 | 0,611886935 |
| A_23_P103503   | NM_002393       | MDM4         | Mdm4 p53 binding protein homolog (mouse)                     | ENST00000391947 | 0,611787278 |
| A_21_P0011706  | NR_024330       | LINC00085    | long intergenic non-protein coding RNA 85                    |                 | 0,611603467 |
| A_24_P130936   | NM_004660       | DDX3Y        | DEAD (Asp-Glu-Ala-Asp) box polypeptide 3, Y-linked           | ENST00000537441 | 0,611541955 |
| A_33_P3249654  | NR_038865       | C19orf29-AS1 | C19orf29 antisense RNA 1 (non-protein coding)                | ENST00000447295 | 0,611343124 |
| A_23_P103276   | NM_138417       | KTI12        | KTI12 homolog, chromatin associated ( <i>S. cerevisiae</i> ) | ENST00000371614 | 0,611336905 |
| A_23_P114405   | NM_012286       | MORF4L2      | mortality factor 4 like 2                                    | ENST00000423833 | 0,611180497 |
| A_23_P114405   | NM_012286       | MORF4L2      | mortality factor 4 like 2                                    | ENST00000423833 | 0,611154064 |
| A_23_P389141   | NM_144990       | SLFNL1       | schlafen-like 1                                              | ENST00000359345 | 0,610977393 |
| A_23_P103661   | NM_139118       | YY1AP1       | YY1 associated protein 1                                     | ENST00000535662 | 0,610960072 |
| A_33_P3383524  | NR_024172       | LOC91948     | uncharacterized LOC91948                                     |                 | 0,610704089 |
| A_23_P101476   | NM_030824       | ZNF442       | zinc finger protein 442                                      | ENST00000242804 | 0,610624946 |
| A_23_P101476   | NM_030824       | ZNF442       | zinc finger protein 442                                      | ENST00000242804 | 0,610514124 |
| A_33_P3363460  | AK128204        | LOC100129186 | uncharacterized LOC100129186                                 |                 | 0,610437057 |

|                |                  |                |                                                                               |                 |             |
|----------------|------------------|----------------|-------------------------------------------------------------------------------|-----------------|-------------|
| A_23_P12526    | NM_005426        | TP53BP2        | tumor protein p53 binding protein, 2                                          | ENST00000391878 | 0,61041134  |
| A_21_P0013850  | NR_028407        | ARMCX4         | armadillo repeat containing, X-linked 4                                       | ENST00000455331 | 0,610396344 |
| A_23_P88703    | NM_005657        | TP53BP1        | tumor protein p53 binding protein 1                                           | ENST00000382044 | 0,610395398 |
| A_23_P23102    | NM_145238        | ZSCAN20        | zinc finger and SCAN domain containing 20                                     | ENST00000326544 | 0,609993594 |
| A_23_P106798   | NM_003031        | SIAH1          | seven in absentia homolog 1 (Drosophila)                                      | ENST00000356721 | 0,609905388 |
| A_23_P119196   | NM_016270        | KLF2           | Kruppel-like factor 2 (lung)                                                  | ENST00000248071 | 0,609767166 |
| A_21_P0014312  | XR_109242        | LOC100507303   | uncharacterized LOC100507303                                                  |                 | 0,609629713 |
| A_33_P3220818  | NM_001201338     | SAFB           | scaffold attachment factor B                                                  | ENST00000433404 | 0,609552688 |
| A_23_P103661   | NM_139118        | YY1AP1         | YY1 associated protein 1                                                      | ENST00000535662 | 0,60952115  |
| A_32_P38645    | NM_182970        | RIMS4          | regulating synaptic membrane exocytosis 4                                     | ENST00000541604 | 0,609475626 |
| A_23_P97283    | NM_024897        | PAQR6          | progesterone and adipoQ receptor family member VI                             | ENST00000468632 | 0,609446169 |
| A_23_P40936    | NM_003298        | NR2C2          | nuclear receptor subfamily 2, group C, member 2                               | ENST00000478572 | 0,609366562 |
| A_24_P29686    | NM_031449        | ZMIZ2          | zinc finger, MIZ-type containing 2                                            | ENST00000309315 | 0,609199075 |
| A_23_P372144   | NM_021231        | C19orf29       | chromosome 19 open reading frame 29                                           | ENST00000221899 | 0,609119229 |
| A_24_P366859   | NM_031941        | USHBP1         | Usher syndrome 1C binding protein 1                                           | ENST00000431146 | 0,608714673 |
| A_23_P111929   | NM_016023        | OTUD6B         | OTU domain containing 6B                                                      | ENST00000524027 | 0,608705006 |
| A_23_P93295    | NM_013936        | OR12D2         | olfactory receptor, family 12, subfamily D, member 2                          | ENST00000443442 | 0,608613224 |
| A_21_P0013355  | TCONS_I2_0002696 | XLOC_I2_014050 |                                                                               |                 | 0,608343673 |
| A_21_P0000253  | NR_002559        | SNORD29        | small nucleolar RNA, C/D box 29                                               |                 | 0,607962145 |
| A_23_P438      | NM_017773        | LAX1           | lymphocyte transmembrane adaptor 1                                            | ENST00000442561 | 0,607896605 |
| A_19_P00321872 | NR_038904        | LOC100506305   | uncharacterized LOC100506305                                                  |                 | 0,607894578 |
| A_21_P0008689  | TCONS_00023542   | XLOC_011375    |                                                                               |                 | 0,607836265 |
| A_21_P0012089  | NR_026758        | LOC440905      | uncharacterized LOC440905                                                     | ENST00000449170 | 0,607826152 |
| A_23_P93180    | NM_003526        | HIST1H2BC      | histone cluster 1, H2bc                                                       | ENST00000396984 | 0,607704054 |
| A_23_P66260    | NM_003414        | ZNF267         | zinc finger protein 267                                                       | ENST00000300870 | 0,607682725 |
| A_24_P286079   | NM_014423        | AFF4           | AF4/FMR2 family, member 4                                                     | ENST00000265343 | 0,607520208 |
| A_21_P0000506  | NR_024187        | SUZ12P         | suppressor of zeste 12 homolog pseudogene                                     |                 | 0,607453917 |
| A_33_P3317558  | NR_003521        | WHAMMP3        | WAS protein homolog associated with actin, golgi membranes and microtubules p |                 | 0,607176868 |
| A_21_P0011501  | ENST00000446912  | XLOC_I2_005350 |                                                                               | ENST00000446912 | 0,607173722 |



|                |                 |                |                                                              |                 |             |
|----------------|-----------------|----------------|--------------------------------------------------------------|-----------------|-------------|
| A_33_P3311653  | ENST00000507766 | PDS5A          | PDS5, regulator of cohesion maintenance, homolog A (S. ce    | ENST00000507766 | 0,607088852 |
| A_33_P3268174  | NM_152903       | KBTBD6         | kelch repeat and BTB (POZ) domain containing 6               | ENST00000379485 | 0,606940121 |
| A_33_P3246293  | NM_001145207    | HBS1L          | HBS1-like (S. cerevisiae)                                    | ENST00000367822 | 0,606876374 |
| A_23_P103661   | NM_139118       | YY1AP1         | YY1 associated protein 1                                     | ENST00000535662 | 0,60684992  |
| A_23_P4400     | NM_033059       | KRTAP4-11      | keratin associated protein 4-11                              | ENST00000391413 | 0,606814127 |
| A_21_P0012170  | DA100741        | XLOC_I2_008981 |                                                              |                 | 0,606584372 |
| A_23_P103661   | NM_139118       | YY1AP1         | YY1 associated protein 1                                     | ENST00000535662 | 0,606583304 |
| A_21_P0000225  | NR_000028       | SNORD83B       | small nucleolar RNA, C/D box 83B                             | ENST00000467105 | 0,606437396 |
| A_19_P00316325 | NR_015353       | LOC92249       | uncharacterized LOC92249                                     | ENST00000433061 | 0,606285375 |
| A_33_P3252989  | NM_015037       | KIAA0913       | KIAA0913                                                     | ENST00000398706 | 0,606244348 |
| A_33_P3289416  | NM_152458       | ZNF785         | zinc finger protein 785                                      | ENST00000395216 | 0,606184975 |
| A_33_P3291459  | NR_037169       | LOC100507547   | uncharacterized LOC100507547                                 | ENST00000487140 | 0,606178839 |
| A_21_P0001804  | ENST00000437798 | XLOC_001300    |                                                              | ENST00000437798 | 0,606038409 |
| A_21_P0013135  | ENST00000417650 | XLOC_I2_012748 |                                                              | ENST00000417650 | 0,605975957 |
| A_33_P3410251  | ENST00000281753 | UNC80          | unc-80 homolog (C. elegans)                                  | ENST00000281753 | 0,605846105 |
| A_33_P3307990  | NM_006610       | MASP2          | mannan-binding lectin serine peptidase 2                     | ENST00000400897 | 0,605821236 |
| A_23_P106002   | NM_020529       | NFKBIA         | nuclear factor of kappa light polypeptide gene enhancer in I | ENST00000554001 | 0,60580265  |
| A_33_P3339103  | NM_203290       | POLR1C         | polymerase (RNA) I polypeptide C, 30kDa                      | ENST00000372373 | 0,605671153 |
| A_23_P103661   | NM_139118       | YY1AP1         | YY1 associated protein 1                                     | ENST00000535662 | 0,605260385 |
| A_33_P3279730  | ENST00000444947 | DDT            | D-dopachrome tautomerase                                     | ENST00000444947 | 0,605256745 |
| A_23_P141345   | NM_001932       | MPP3           | membrane protein, palmitoylated 3 (MAGUK p55 subfamily       | ENST00000398389 | 0,604815589 |
| A_21_P0012333  | NM_171828       | KCNMB3         | potassium large conductance calcium-activated channel, su    | ENST00000485523 | 0,604579877 |
| A_23_P112412   | NM_017746       | TEX10          | testis expressed 10                                          | ENST00000444730 | 0,604572218 |
| A_21_P0010156  | ENST00000436529 | XLOC_013905    |                                                              | ENST00000436529 | 0,604512982 |
| A_33_P3228023  | NM_021626       | SCPEP1         | serine carboxypeptidase 1                                    | ENST00000262288 | 0,604456524 |
| A_21_P0014432  | XR_109753       | LOC100507599   | uncharacterized LOC100507599                                 |                 | 0,604308454 |
| A_23_P212639   | NM_004593       | TRA2B          | transformer 2 beta homolog (Drosophila)                      | ENST00000456380 | 0,604084557 |
| A_33_P3417459  | NR_023358       | SCARNA9L       | small Cajal body-specific RNA 9-like (retrotransposed)       |                 | 0,604044428 |
| A_23_P156809   | NM_001127395    | METTL21A       | methyltransferase like 21A                                   | ENST00000412930 | 0,60399347  |

|               |                  |                |                                                                                         |                 |             |
|---------------|------------------|----------------|-----------------------------------------------------------------------------------------|-----------------|-------------|
| A_21_P0006325 | TCONS_00016488   | XLOC_007866    |                                                                                         |                 | 0,603929477 |
| A_23_P133585  | NM_001799        | CDK7           | cyclin-dependent kinase 7                                                               | ENST00000256443 | 0,603759098 |
| A_33_P3473108 | Z39353           | SNORA66        | small nucleolar RNA, H/ACA box 66                                                       |                 | 0,603487834 |
| A_23_P302038  | NM_004575        | POU4F2         | POU class 4 homeobox 2                                                                  | ENST00000281321 | 0,603232078 |
| A_24_P97374   | NM_005442        | EOMES          | eomesodermin                                                                            | ENST00000535713 | 0,603196808 |
| A_23_P16415   | NM_002333        | LRP3           | low density lipoprotein receptor-related protein 3                                      | ENST00000431491 | 0,603194345 |
| A_21_P0005447 | NR_028090        | LOC202781      | uncharacterized LOC202781                                                               |                 | 0,603181832 |
| A_33_P3369979 | NM_001004686     | OR2L2          | olfactory receptor, family 2, subfamily L, member 2                                     | ENST00000366479 | 0,603171044 |
| A_23_P256603  | NM_001207008     | MLLT4          | myeloid/lymphoid or mixed-lineage leukemia (trithorax homologue 4)                      | ENST00000366809 | 0,603164279 |
| A_21_P0009465 | TCONS_00026297   | XLOC_012641    |                                                                                         |                 | 0,603127053 |
| A_23_P110699  | NM_052860        | ZNF300         | zinc finger protein 300                                                                 | ENST00000394226 | 0,60306041  |
| A_23_P111929  | NM_016023        | OTUD6B         | OTU domain containing 6B                                                                | ENST00000524027 | 0,6030162   |
| A_33_P3262665 | NM_024597        | MAP7D3         | MAP7 domain containing 3                                                                | ENST00000370663 | 0,602986976 |
| A_33_P3327454 | NM_133368        | RSPRY1         | ring finger and SPRY domain containing 1                                                | ENST00000537866 | 0,602787008 |
| A_33_P3275959 | BC001407         | SLC25A16       | solute carrier family 25 (mitochondrial carrier; Graves disease autoantigen), member 16 |                 | 0,602695216 |
| A_21_P0000490 | NR_004381        | SNORD105       | small nucleolar RNA, C/D box 105                                                        |                 | 0,60266787  |
| A_21_P0000220 | NR_000020        | SNORD33        | small nucleolar RNA, C/D box 33                                                         | ENST00000476268 | 0,602430231 |
| A_33_P3403082 | NR_027686        | LINC00176      | long intergenic non-protein coding RNA 176                                              |                 | 0,602410551 |
| A_32_P192692  | NM_001014797     | KCNMA1         | potassium large conductance calcium-activated channel, subfamily M, alpha member 1      |                 | 0,602410039 |
| A_21_P0013723 | NR_015363        | MGC21881       | uncharacterized locus MGC21881                                                          | ENST00000467494 | 0,602269898 |
| A_21_P0011604 | NR_026903        | AMZ2P1         | archaelysin family metallopeptidase 2 pseudogene 1                                      |                 | 0,6021981   |
| A_21_P0013330 | TCONS_I2_0002666 | XLOC_I2_013877 |                                                                                         |                 | 0,602177559 |
| A_33_P3406066 | NM_173632        | ZNF776         | zinc finger protein 776                                                                 | ENST00000317178 | 0,602106636 |
| A_23_P113471  | NM_174912        | FAAH2          | fatty acid amide hydrolase 2                                                            | ENST00000491179 | 0,602089092 |
| A_21_P0012042 | ENST00000429730  | XLOC_I2_007731 |                                                                                         | ENST00000429730 | 0,602074869 |
| A_33_P3409854 | NM_005568        | LHX1           | LIM homeobox 1                                                                          | ENST00000254457 | 0,601974313 |
| A_33_P3383351 | ENST00000464187  | COL5A1         | collagen, type V, alpha 1                                                               | ENST00000464187 | 0,601845154 |
| A_24_P419177  | NM_014497        | ZNF638         | zinc finger protein 638                                                                 | ENST00000377802 | 0,601761642 |
| A_33_P3233125 | NM_002779        | PSD            | pleckstrin and Sec7 domain containing                                                   | ENST0000020673  | 0,601745121 |

|               |                 |                |                                                         |                 |             |
|---------------|-----------------|----------------|---------------------------------------------------------|-----------------|-------------|
| A_33_P3304538 | NM_207396       | RNF207         | ring finger protein 207                                 | ENST00000496676 | 0,601727458 |
| A_23_P431923  | NR_027250       | SSX8           | synovial sarcoma, X breakpoint 8                        |                 | 0,601682031 |
| A_21_P0000291 | NR_002751       | SNORD41        | small nucleolar RNA, C/D box 41                         |                 | 0,601599114 |
| A_33_P3384667 | BC022967        | DCAF5          | DDB1 and CUL4 associated factor 5                       | ENST00000389997 | 0,601586983 |
| A_23_P27133   | NM_002275       | KRT15          | keratin 15                                              | ENST00000474031 | 0,6014857   |
| A_23_P13244   | NM_001005205    | OR8J1          | olfactory receptor, family 8, subfamily J, member 1     | ENST00000303039 | 0,601482344 |
| A_21_P0010267 | HQ013231        | XLOC_013994    |                                                         |                 | 0,601355306 |
| A_33_P3808996 | NM_023071       | SPATS2         | spermatogenesis associated, serine-rich 2               | ENST00000552918 | 0,601291835 |
| A_33_P3254634 | NM_006810       | PDIA5          | protein disulfide isomerase family A, member 5          | ENST00000495004 | 0,601228541 |
| A_33_P3242923 | NR_038358       | LOC283553      | uncharacterized LOC283553                               | ENST00000554409 | 0,601138549 |
| A_21_P0009357 | TCONS_00025747  | XLOC_012564    |                                                         |                 | 0,600977155 |
| A_23_P119196  | NM_016270       | KLF2           | Kruppel-like factor 2 (lung)                            | ENST00000248071 | 0,600919989 |
| A_23_P103661  | NM_139118       | YY1AP1         | YY1 associated protein 1                                | ENST00000535662 | 0,600895382 |
| A_33_P3209816 | NM_207325       | DPY19L3        | dpy-19-like 3 (C. elegans)                              | ENST00000392248 | 0,600758069 |
| A_23_P161624  | NM_005438       | FOSL1          | FOS-like antigen 1                                      | ENST00000312562 | 0,600633918 |
| A_24_P382119  | NM_004687       | MTMR4          | myotubularin related protein 4                          | ENST00000323456 | 0,600618903 |
| A_33_P3311618 | NM_004582       | RABGGTB        | Rab geranylgeranyltransferase, beta subunit             | ENST00000370824 | 0,600606443 |
| A_21_P0013289 | THC2668011      | XLOC_I2_013751 |                                                         |                 | 0,600486948 |
| A_21_P0013324 | ENST00000412091 | XLOC_I2_013873 |                                                         | ENST00000412091 | 0,600475551 |
| A_23_P215435  | ENST00000395270 | POM121         | POM121 membrane glycoprotein                            | ENST00000395270 | 0,600356042 |
| A_23_P112950  | NM_018179       | ATF7IP         | activating transcription factor 7 interacting protein   | ENST00000540793 | 0,600330873 |
| A_23_P103661  | NM_139118       | YY1AP1         | YY1 associated protein 1                                | ENST00000535662 | 0,600172559 |
| A_23_P151662  | NM_197957       | MAX            | MYC associated factor X                                 | ENST00000554709 | 0,600165047 |
| A_21_P0013953 | ENST00000435655 | LOC653720      |                                                         | ENST00000435655 | 0,600159553 |
| A_33_P3397073 | NR_037169       | LOC100507547   | uncharacterized LOC100507547                            | ENST00000480799 | 0,600002236 |
| A_24_P379750  | NM_002357       | MXD1           | MAX dimerization protein 1                              | ENST00000264444 | 0,599994596 |
| A_23_P105545  | NM_016830       | VAMP1          | vesicle-associated membrane protein 1 (synaptobrevin 1) | ENST00000535927 | 0,599986622 |
| A_21_P0000020 | NM_001146699    | RBM19          | RNA binding motif protein 19                            | ENST00000545145 | 0,599873283 |
| A_21_P0003286 | TCONS_00007181  | XLOC_003149    |                                                         |                 | 0,599840329 |

|               |                 |                |                                                           |                 |             |
|---------------|-----------------|----------------|-----------------------------------------------------------|-----------------|-------------|
| A_23_P91001   | NM_019048       | ASNSD1         | asparagine synthetase domain containing 1                 | ENST00000420250 | 0,59980176  |
| A_33_P3346552 | NR_003287       | RN28S1         | RNA, 28S ribosomal 1                                      |                 | 0,5997888   |
| A_21_P0000365 | NR_003030       | SNORD12        | small nucleolar RNA, C/D box 12                           |                 | 0,599259652 |
| A_21_P0000275 | NR_002592       | SNORD96A       | small nucleolar RNA, C/D box 96A                          | ENST00000502890 | 0,59915705  |
| A_21_P0006606 | TCONS_00017647  | XLOC_008323    |                                                           |                 | 0,599119128 |
| A_23_P106798  | NM_003031       | SIAH1          | seven in absentia homolog 1 (Drosophila)                  | ENST00000356721 | 0,599055998 |
| A_21_P0009997 | CD679150        | XLOC_013631    |                                                           |                 | 0,599039793 |
| A_23_P112950  | NM_018179       | ATF7IP         | activating transcription factor 7 interacting protein     | ENST00000540793 | 0,59861468  |
| A_33_P3233649 | NM_001085411    | NADKD1         | NAD kinase domain containing 1                            | ENST00000397338 | 0,598584912 |
| A_24_P926684  | ENST00000503418 | UBE2D3         | ubiquitin-conjugating enzyme E2D 3                        | ENST00000503418 | 0,598575683 |
| A_21_P0012753 | ENST00000513425 | XLOC_I2_010888 |                                                           | ENST00000513425 | 0,598550071 |
| A_21_P0010590 | THC2520724      | XLOC_I2_000727 |                                                           |                 | 0,598446052 |
| A_33_P3358626 | NM_005640       | TAF4B          | TAF4b RNA polymerase II, TATA box binding protein (TBP)-a | ENST00000418698 | 0,598403017 |
| A_33_P3394198 | NM_004957       | FPGS           | folylpolyglutamate synthase                               | ENST00000373228 | 0,59833219  |
| A_21_P0004121 | ENST00000511579 | XLOC_004774    |                                                           | ENST00000511579 | 0,598260983 |
| A_24_P570583  | NR_003127       | ZNF542         | zinc finger protein 542                                   | ENST00000488113 | 0,598233097 |
| A_23_P112412  | NM_017746       | TEX10          | testis expressed 10                                       | ENST00000444730 | 0,598154478 |
| A_24_P659122  | XR_132464       | LOC401357      | uncharacterized LOC401357                                 |                 | 0,598141802 |
| A_33_P3384260 | ENST00000546500 | HNRNPA1        | heterogeneous nuclear ribonucleoprotein A1                | ENST00000546500 | 0,598107858 |
| A_33_P3210900 | ENST00000397099 | SEC13          | SEC13 homolog (S. cerevisiae)                             | ENST00000397099 | 0,598089762 |
| A_21_P0014480 | XR_110024       | LOC401068      | uncharacterized LOC401068                                 |                 | 0,598064182 |
| A_32_P173662  | NM_003296       | CRISP2         | cysteine-rich secretory protein 2                         | ENST00000339139 | 0,597876824 |
| A_21_P0012665 | ENST00000509098 | XLOC_I2_011114 |                                                           | ENST00000509098 | 0,597857623 |
| A_23_P103276  | NM_138417       | KTI12          | KTI12 homolog, chromatin associated (S. cerevisiae)       | ENST00000371614 | 0,597854372 |
| A_33_P3239143 | NM_198458       | ZNF497         | zinc finger protein 497                                   | ENST00000391697 | 0,597434996 |
| A_21_P0001725 | ENST00000424948 | XLOC_000808    |                                                           | ENST00000424948 | 0,597193968 |
| A_23_P142574  | NM_058165       | MOGAT1         | monoacylglycerol O-acyltransferase 1                      | ENST00000446656 | 0,597122692 |
| A_24_P233078  | NR_003064       | PYY2           | peptide YY, 2 (seminalplasmin)                            | ENST00000441253 | 0,59702194  |
| A_23_P301336  | NM_014472       | C10orf28       | chromosome 10 open reading frame 28                       | ENST00000370584 | 0,597007202 |

|                |                 |                |                                                             |                 |             |
|----------------|-----------------|----------------|-------------------------------------------------------------|-----------------|-------------|
| A_23_P101476   | NM_030824       | ZNF442         | zinc finger protein 442                                     | ENST00000242804 | 0,596987411 |
| A_21_P0013069  | NR_003504       | GUSBP2         | glucuronidase, beta pseudogene 2                            | ENST00000466668 | 0,596833431 |
| A_24_P20630    | NM_016269       | LEF1           | lymphoid enhancer-binding factor 1                          | ENST00000503879 | 0,596790599 |
| A_21_P0013989  | XM_003119970    | LOC100509824   | uncharacterized LOC100509824                                |                 | 0,596743874 |
| A_33_P3302662  | ENST00000461758 | TLE4           | transducin-like enhancer of split 4 (E(sp1) homolog, Drosop | ENST00000461758 | 0,596731649 |
| A_23_P207680   | NM_001039083    | ARL17B         | ADP-ribosylation factor-like 17B                            | ENST00000329240 | 0,596595731 |
| A_23_P47125    | NM_153444       | OR5P2          | olfactory receptor, family 5, subfamily P, member 2         | ENST00000329434 | 0,596072219 |
| A_33_P3735771  | BC003645        | LOC642776      | uncharacterized LOC642776                                   |                 | 0,596017687 |
| A_21_P0000083  | NM_004366       | CLCN2          | chloride channel 2                                          | ENST00000430397 | 0,595977712 |
| A_23_P345830   | NM_014929       | FASTKD2        | FAST kinase domains 2                                       | ENST00000403094 | 0,595888646 |
| A_23_P112412   | NM_017746       | TEX10          | testis expressed 10                                         | ENST00000444730 | 0,595883509 |
| A_23_P374689   | NM_000817       | GAD1           | glutamate decarboxylase 1 (brain, 67kDa)                    | ENST00000478562 | 0,595694438 |
| A_19_P00318666 | ENST00000430244 | Q9UJ41         |                                                             | ENST00000430244 | 0,595675556 |
| A_21_P0001658  | THC2736935      | XLOC_000026    |                                                             |                 | 0,595477454 |
| A_19_P00321782 | NR_015431       | FLJ43663       | uncharacterized LOC378805                                   |                 | 0,595344485 |
| A_21_P0013966  | ENST00000423269 | CLTC-IT1       |                                                             | ENST00000423269 | 0,595271749 |
| A_23_P128993   | NM_033423       | GZMH           | granzyme H (cathepsin G-like 2, protein h-CCPX)             | ENST00000382547 | 0,595177992 |
| A_23_P120153   | NM_173647       | RNF149         | ring finger protein 149                                     | ENST00000295317 | 0,595109998 |
| A_33_P3328716  | NM_144719       | CCDC13         | coiled-coil domain containing 13                            | ENST00000310232 | 0,59510147  |
| A_23_P84910    | NM_003446       | ZNF157         | zinc finger protein 157                                     | ENST00000377073 | 0,59507666  |
| A_23_P91512    | NM_144492       | CLDN14         | claudin 14                                                  | ENST00000399137 | 0,59506426  |
| A_21_P0002374  | TCONS_00004060  | XLOC_001908    |                                                             |                 | 0,595059395 |
| A_23_P254254   | NM_000199       | SGSH           | N-sulfoglucosamine sulfohydrolase                           | ENST00000534910 | 0,59489312  |
| A_24_P409346   | NM_006310       | NPEPPS         | aminopeptidase puromycin sensitive                          | ENST00000527824 | 0,59466172  |
| A_23_P129466   | NM_024997       | ATF7IP2        | activating transcription factor 7 interacting protein 2     | ENST00000356427 | 0,594647101 |
| A_21_P0012887  | ENST00000343123 | XLOC_I2_011911 |                                                             | ENST00000343123 | 0,594471222 |
| A_23_P385911   | NM_001145314    | CEP44          | centrosomal protein 44kDa                                   | ENST00000396791 | 0,594444653 |
| A_33_P3232277  | NM_004060       | CCNG1          | cyclin G1                                                   | ENST00000511490 | 0,594365471 |
| A_23_P83798    | NM_006982       | ALX1           | ALX homeobox 1                                              | ENST00000316824 | 0,594254514 |



|               |                 |                |                                                                  |                 |             |
|---------------|-----------------|----------------|------------------------------------------------------------------|-----------------|-------------|
| A_23_P218784  | NM_006386       | DDX17          | DEAD (Asp-Glu-Ala-Asp) box polypeptide 17                        | ENST00000432525 | 0,594088345 |
| A_21_P0000332 | NR_002977       | SNORA45        | small nucleolar RNA, H/ACA box 45                                |                 | 0,594064136 |
| A_23_P111929  | NM_016023       | OTUD6B         | OTU domain containing 6B                                         | ENST00000524027 | 0,594043435 |
| A_33_P3418194 | NM_023946       | LYNX1          | Ly6/neurotoxin 1                                                 | ENST00000335822 | 0,593967248 |
| A_23_P112950  | NM_018179       | ATF7IP         | activating transcription factor 7 interacting protein            | ENST00000540793 | 0,593772503 |
| A_21_P0007224 | ENST00000527519 | XLOC_009183    |                                                                  | ENST00000527519 | 0,593688468 |
| A_33_P3381796 | XR_108716       | LOC393078      | uncharacterized LOC393078                                        |                 | 0,593595542 |
| A_33_P3407266 | NM_012204       | GTF3C4         | general transcription factor IIIC, polypeptide 4, 90kDa          | ENST00000483873 | 0,593589947 |
| A_24_P29277   | NM_001130105    | COL4A3BP       | collagen, type IV, alpha 3 (Goodpasture antigen) binding protein |                 | 0,593546527 |
| A_21_P0008252 | TCONS_00022267  | XLOC_010588    |                                                                  |                 | 0,593443827 |
| A_33_P3393927 | NM_181873       | MTMR11         | myotubularin related protein 11                                  | ENST00000369140 | 0,593408053 |
| A_21_P0000650 | NM_021047       | ZNF253         | zinc finger protein 253                                          | ENST00000502675 | 0,593239529 |
| A_21_P0011228 | ENST00000435617 | XLOC_l2_003974 |                                                                  | ENST00000435617 | 0,593116128 |
| A_21_P0006339 | TCONS_00016530  | XLOC_007264    |                                                                  |                 | 0,592809348 |
| A_23_P87879   | NM_001781       | CD69           | CD69 molecule                                                    | ENST00000228434 | 0,592796171 |
| A_24_P25530   | NM_000835       | GRIN2C         | glutamate receptor, ionotropic, N-methyl D-aspartate 2C          | ENST00000347612 | 0,592733221 |
| A_21_P0009660 | ENST00000420038 | XLOC_012971    |                                                                  | ENST00000420038 | 0,592661487 |
| A_32_P360193  | NM_144666       | DNHD1          | dynein heavy chain domain 1                                      | ENST00000532027 | 0,592635955 |
| A_33_P3362727 | ENST00000376256 | HNRNPK         | heterogeneous nuclear ribonucleoprotein K                        | ENST00000376256 | 0,592572173 |
| A_33_P3316505 | NR_002907       | SNORA73A       | small nucleolar RNA, H/ACA box 73A                               | ENST00000437681 | 0,592567782 |
| A_33_P3281363 | BC037956        | TRIP12         | thyroid hormone receptor interactor 12                           | ENST00000409677 | 0,592558586 |
| A_23_P106002  | NM_020529       | NFKBIA         | nuclear factor of kappa light polypeptide gene enhancer in I     | ENST00000554001 | 0,592335915 |
| A_33_P3271301 | NM_181492       | TCF20          | transcription factor 20 (AR1)                                    | ENST00000335626 | 0,592142367 |
| A_21_P0013956 | ENST00000414050 | PPFIA4         | protein tyrosine phosphatase, receptor type, f polypeptide       | ENST00000414050 | 0,592003419 |
| A_23_P155765  | NM_002129       | HMGB2          | high mobility group box 2                                        | ENST00000511316 | 0,591986484 |
| A_23_P111929  | NM_016023       | OTUD6B         | OTU domain containing 6B                                         | ENST00000524027 | 0,591960237 |
| A_23_P218058  | NM_013431       | KLRC4          | killer cell lectin-like receptor subfamily C, member 4           | ENST00000309384 | 0,591782053 |
| A_21_P0000760 | NR_038318       | LOC100526771   | uncharacterized LOC100526771                                     | ENST00000527329 | 0,591778993 |
| A_23_P106798  | NM_003031       | SIAH1          | seven in absentia homolog 1 (Drosophila)                         | ENST00000356721 | 0,59170284  |

|                |                 |              |                                                                |                 |             |
|----------------|-----------------|--------------|----------------------------------------------------------------|-----------------|-------------|
| A_33_P3230926  | AK127488        | LOC100130429 | uncharacterized LOC100130429                                   |                 | 0,591600714 |
| A_33_P3235706  | BC048301        | ZCCHC11      | zinc finger, CCHC domain containing 11                         | ENST00000355809 | 0,591558138 |
| A_23_P35316    | NM_020394       | ZNF695       | zinc finger protein 695                                        | ENST00000339986 | 0,591486852 |
| A_21_P0005943  | TCONS_00015327  | XLOC_006878  |                                                                |                 | 0,591375195 |
| A_23_P111797   | AL136837        | DKFZP434F142 | uncharacterized DKFZp434F142                                   |                 | 0,591368004 |
| A_21_P0005216  | ENST00000448898 | XLOC_005999  |                                                                | ENST00000448898 | 0,591363775 |
| A_33_P3233841  | NM_002184       | IL6ST        | interleukin 6 signal transducer (gp130, oncostatin M recept    | ENST00000523039 | 0,591257507 |
| A_23_P112950   | NM_018179       | ATF7IP       | activating transcription factor 7 interacting protein          | ENST00000540793 | 0,5911466   |
| A_33_P3812027  | BC032033        | LOC414300    | uncharacterized LOC414300                                      |                 | 0,591035502 |
| A_32_P126229   | NM_001190766    | FLJ23152     | uncharacterized LOC401236                                      |                 | 0,59102241  |
| A_21_P0000631  | NR_034079       | LOC643733    | caspase 4, apoptosis-related cysteine peptidase pseudogen      | ENST00000531091 | 0,59095978  |
| A_33_P3377719  | AK123839        | LOC100129112 | uncharacterized LOC100129112                                   |                 | 0,590557902 |
| A_23_P127079   | NM_015062       | PPRC1        | peroxisome proliferator-activated receptor gamma, coactiv      | ENST00000413464 | 0,590276522 |
| A_21_P0000378  | NR_003055       | SNORD66      | small nucleolar RNA, C/D box 66                                |                 | 0,590272005 |
| A_33_P3218797  | ENST00000370177 | PPDPF        | pancreatic progenitor cell differentiation and proliferation f | ENST00000370177 | 0,590217951 |
| A_32_P202759   | NM_177454       | FAM171B      | family with sequence similarity 171, member B                  | ENST00000272804 | 0,589869181 |
| A_19_P00325336 | XR_109771       | LOC100506774 | uncharacterized LOC100506774                                   |                 | 0,589797373 |
| A_23_P389897   | NM_002507       | NGFR         | nerve growth factor receptor                                   | ENST00000172229 | 0,589697299 |
| A_21_P0013562  | NR_036592       | LOC100506710 | endogenous Bornavirus-like nucleoprotein 2 pseudogene          | ENST00000429493 | 0,589577609 |
| A_21_P0011694  | NR_038279       | LOC100506930 | uncharacterized LOC100506930                                   | ENST00000412740 | 0,589549137 |
| A_23_P106002   | NM_020529       | NFKBIA       | nuclear factor of kappa light polypeptide gene enhancer in I   | ENST00000554001 | 0,589537522 |
| A_23_P155376   | NM_015513       | CRELD1       | cysteine-rich with EGF-like domains 1                          | ENST00000397170 | 0,589514697 |
| A_23_P116249   | NM_014619       | GRIK4        | glutamate receptor, ionotropic, kainate 4                      | ENST00000527524 | 0,589452225 |
| A_21_P0005349  | ENST00000421380 | XLOC_005965  |                                                                | ENST00000421380 | 0,589426503 |
| A_21_P0001616  | TCONS_00001799  | XLOC_001188  |                                                                |                 | 0,589196896 |
| A_23_P8497     | NM_000823       | GHRHR        | growth hormone releasing hormone receptor                      | ENST00000461424 | 0,589196198 |
| A_24_P51855    | NM_001947       | DUSP7        | dual specificity phosphatase 7                                 | ENST00000296483 | 0,589053605 |
| A_23_P120153   | NM_173647       | RNF149       | ring finger protein 149                                        | ENST00000295317 | 0,589050346 |
| A_21_P0004259  | ENST00000520762 | XLOC_004412  |                                                                | ENST00000520762 | 0,589009781 |

|                |                 |                |                                                              |                 |             |
|----------------|-----------------|----------------|--------------------------------------------------------------|-----------------|-------------|
| A_33_P3262555  | NM_001174118    | MEX3D          | mex-3 homolog D (C. elegans)                                 | ENST00000388824 | 0,58895638  |
| A_33_P3319860  | NR_036467       | IFFO1          | intermediate filament family orphan 1                        | ENST00000487279 | 0,588924931 |
| A_33_P3278033  | NM_001004125    | TUSC1          | tumor suppressor candidate 1                                 | ENST00000358022 | 0,588869152 |
| A_23_P112950   | NM_018179       | ATF7IP         | activating transcription factor 7 interacting protein        | ENST00000540793 | 0,588851087 |
| A_23_P119857   | NM_001008237    | TTC32          | tetratricopeptide repeat domain 32                           | ENST00000495698 | 0,588719267 |
| A_23_P307392   | AK024141        | DPF3           | D4, zinc and double PHD fingers, family 3                    | ENST00000540281 | 0,588661545 |
| A_23_P316472   | NM_144666       | DNHD1          | dynein heavy chain domain 1                                  | ENST00000254579 | 0,588578857 |
| A_21_P0000252  | NR_002450       | SNORD68        | small nucleolar RNA, C/D box 68                              | ENST00000487034 | 0,588516526 |
| A_21_P0013621  | THC2620084      | XLOC_I2_015121 |                                                              |                 | 0,588433236 |
| A_23_P119857   | NM_001008237    | TTC32          | tetratricopeptide repeat domain 32                           | ENST00000495698 | 0,588431911 |
| A_33_P3357490  | NM_001009565    | CDKL4          | cyclin-dependent kinase-like 4                               | ENST00000378803 | 0,588378448 |
| A_21_P0006990  | TCONS_00018496  | XLOC_008802    |                                                              |                 | 0,588321324 |
| A_23_P94494    | NM_007005       | TLE4           | transducin-like enhancer of split 4 (E(sp1) homolog, Drosop  | ENST00000376534 | 0,588200365 |
| A_23_P327483   | NM_019073       | SPATA6         | spermatogenesis associated 6                                 | ENST00000396199 | 0,588066126 |
| A_33_P3210228  | ENST00000375947 | ZCCHC6         | zinc finger, CCHC domain containing 6                        | ENST00000375947 | 0,587949909 |
| A_33_P3410895  | ENST00000421059 | POR            | P450 (cytochrome) oxidoreductase                             | ENST00000421059 | 0,587860783 |
| A_33_P3365747  | NR_026999       | LINC00265      | long intergenic non-protein coding RNA 265                   |                 | 0,587831554 |
| A_23_P101811   | NM_021030       | ZNF14          | zinc finger protein 14                                       | ENST00000344099 | 0,587809866 |
| A_24_P117942   | NM_207377       | TOMM20L        | translocase of outer mitochondrial membrane 20 homolog       | ENST00000557754 | 0,587596266 |
| A_23_P31376    | NM_018334       | LRRN3          | leucine rich repeat neuronal 3                               | ENST00000308478 | 0,587583911 |
| A_33_P3214948  | NM_014767       | SPOCK2         | sparc/osteonectin, cwcv and kazal-like domains proteoglyca   | ENST00000373109 | 0,587567351 |
| A_23_P106002   | NM_020529       | NFKBIA         | nuclear factor of kappa light polypeptide gene enhancer in I | ENST00000554001 | 0,58752934  |
| A_33_P3807268  | NR_033424       | DNAJA1P5       | DnaJ (Hsp40) homolog, subfamily A, member 1 pseudogene 5     |                 | 0,587467838 |
| A_32_P71788    | NM_002014       | FKBP4          | FK506 binding protein 4, 59kDa                               | ENST00000543037 | 0,587442293 |
| A_23_P50217    | NM_024833       | ZNF671         | zinc finger protein 671                                      | ENST00000317398 | 0,587439466 |
| A_33_P3809606  | AK127576        | FLJ45671       | uncharacterized LOC400212                                    |                 | 0,587398442 |
| A_33_P3299421  | NM_020880       | ZNF530         | zinc finger protein 530                                      | ENST00000332854 | 0,587370931 |
| A_19_P00806473 | ENST00000443965 | Q49AT5         |                                                              | ENST00000443965 | 0,587252369 |
| A_24_P65060    | NM_032246       | MEX3B          | mex-3 homolog B (C. elegans)                                 | ENST00000329713 | 0,587216353 |

|               |                  |                |                                                            |                 |             |
|---------------|------------------|----------------|------------------------------------------------------------|-----------------|-------------|
| A_23_P383132  | NM_015094        | HIC2           | hypermethylated in cancer 2                                | ENST00000443632 | 0,587018559 |
| A_21_P0002744 | BC044922         | XLOC_002672    |                                                            |                 | 0,58700509  |
| A_33_P3223678 | NM_014564        | LHX3           | LIM homeobox 3                                             | ENST00000325195 | 0,586971971 |
| A_23_P39116   | NM_000234        | LIG1           | ligase I, DNA, ATP-dependent                               | ENST00000544761 | 0,586946491 |
| A_24_P37712   | NM_003215        | TEC            | tec protein tyrosine kinase                                | ENST00000381501 | 0,58687979  |
| A_23_P106042  | NM_001037288     | CMTM5          | CKLF-like MARVEL transmembrane domain containing 5         | ENST00000553750 | 0,586839529 |
| A_21_P0011343 | TCONS_I2_0000887 | XLOC_I2_004817 |                                                            |                 | 0,586816116 |
| A_23_P103361  | NM_005356        | LCK            | lymphocyte-specific protein tyrosine kinase                | ENST00000469765 | 0,586615373 |
| A_23_P101131  | NM_002091        | GRP            | gastrin-releasing peptide                                  | ENST00000256857 | 0,586570682 |
| A_21_P0010262 | ENST00000417820  | XLOC_013973    |                                                            | ENST00000417820 | 0,586564876 |
| A_33_P3251932 | NM_207002        | BCL2L11        | BCL2-like 11 (apoptosis facilitator)                       | ENST00000337565 | 0,586408041 |
| A_23_P156683  | NM_000595        | LTA            | lymphotoxin alpha (TNF superfamily, member 1)              | ENST00000383303 | 0,586326721 |
| A_23_P119196  | NM_016270        | KLF2           | Kruppel-like factor 2 (lung)                               | ENST00000248071 | 0,586249739 |
| A_21_P0001154 | ENST00000414039  | XLOC_000920    |                                                            | ENST00000414039 | 0,586238312 |
| A_23_P111303  | NM_014892        | SCAF8          | SR-related CTD-associated factor 8                         | ENST00000417268 | 0,586221174 |
| A_23_P111724  | NM_138290        | RUNDC3B        | RUN domain containing 3B                                   | ENST00000493037 | 0,586195127 |
| A_33_P3251430 | NM_003489        | NRIP1          | nuclear receptor interacting protein 1                     | ENST00000318948 | 0,586074897 |
| A_23_P112950  | NM_018179        | ATF7IP         | activating transcription factor 7 interacting protein      | ENST00000540793 | 0,58597788  |
| A_23_P89780   | NM_198129        | LAMA3          | laminin, alpha 3                                           | ENST00000416669 | 0,585923416 |
| A_33_P3361701 | NM_001127320     | UBAP2L         | ubiquitin associated protein 2-like                        | ENST00000465855 | 0,585922816 |
| A_21_P0005640 | TCONS_00014570   | XLOC_006680    |                                                            |                 | 0,585914459 |
| A_23_P111865  | NM_145914        | ZSCAN21        | zinc finger and SCAN domain containing 21                  | ENST00000292450 | 0,585889261 |
| A_23_P115161  | NM_002036        | DARC           | Duffy blood group, chemokine receptor                      | ENST00000435307 | 0,585886643 |
| A_23_P151851  | NM_014080        | DUOX2          | dual oxidase 2                                             | ENST00000389039 | 0,585798151 |
| A_33_P3709317 | NR_002964        | SNORA28        | small nucleolar RNA, H/ACA box 28                          |                 | 0,585721861 |
| A_33_P3300346 | NM_001014283     | DCUN1D2        | DCN1, defective in cullin neddylation 1, domain containing | ENST00000375399 | 0,585640349 |
| A_23_P119857  | NM_001008237     | TTC32          | tetratricopeptide repeat domain 32                         | ENST00000495698 | 0,585529611 |
| A_21_P0000035 | NM_001162900     | TMEM217        | transmembrane protein 217                                  | ENST00000482580 | 0,585431647 |
| A_21_P0011874 | EL584821         | XLOC_I2_007767 |                                                            |                 | 0,585225704 |

|               |                 |              |                                                                       |                 |             |
|---------------|-----------------|--------------|-----------------------------------------------------------------------|-----------------|-------------|
| A_23_P100420  | NM_015144       | ZCCHC14      | zinc finger, CCHC domain containing 14                                | ENST00000268616 | 0,585216906 |
| A_33_P3374463 | NM_001242336    | MFAP3        | microfibrillar-associated protein 3                                   | ENST00000322602 | 0,585156339 |
| A_23_P119857  | NM_001008237    | TTC32        | tetratricopeptide repeat domain 32                                    | ENST00000495698 | 0,585142893 |
| A_23_P103837  | NM_001127320    | UBAP2L       | ubiquitin associated protein 2-like                                   | ENST00000475373 | 0,584983967 |
| A_33_P3424328 | ENST00000229824 | RAB44        | RAB44, member RAS oncogene family                                     | ENST00000229824 | 0,584981635 |
| A_23_P92642   | NM_024668       | ANKHD1       | ankyrin repeat and KH domain containing 1                             | ENST00000394723 | 0,584967584 |
| A_24_P214598  | NM_152542       | PPM1K        | protein phosphatase, Mg <sup>2+</sup> /Mn <sup>2+</sup> dependent, 1K | ENST00000506423 | 0,584922457 |
| A_23_P106002  | NM_020529       | NFKBIA       | nuclear factor of kappa light polypeptide gene enhancer in I          | ENST00000554001 | 0,584913294 |
| A_23_P214587  | NM_003449       | TRIM26       | tripartite motif containing 26                                        | ENST00000327357 | 0,584902608 |
| A_23_P120153  | NM_173647       | RNF149       | ring finger protein 149                                               | ENST00000295317 | 0,584850625 |
| A_21_P0003228 | AI796562        | XLOC_002647  |                                                                       |                 | 0,584849454 |
| A_21_P0014437 | XR_109797       | LOC100505930 | uncharacterized LOC100505930                                          |                 | 0,584675797 |
| A_24_P268993  | NM_052971       | LEAP2        | liver expressed antimicrobial peptide 2                               | ENST00000485457 | 0,584636938 |
| A_33_P3321611 | NM_001048183    | PHACTR4      | phosphatase and actin regulator 4                                     | ENST00000463428 | 0,584524403 |
| A_24_P57898   | NM_080606       | BHLHE23      | basic helix-loop-helix family, member e23                             | ENST00000370346 | 0,584152186 |
| A_23_P37127   | NM_004496       | FOXA1        | forkhead box A1                                                       | ENST00000250448 | 0,583992012 |
| A_33_P3226407 | XR_132886       | LOC729732    | uncharacterized LOC729732                                             |                 | 0,58387048  |
| A_21_P0000263 | NR_002576       | SNORA21      | small nucleolar RNA, H/ACA box 21                                     |                 | 0,58355603  |
| A_33_P3220152 | NM_014963       | SBNO2        | strawberry notch homolog 2 (Drosophila)                               | ENST00000250872 | 0,583488975 |
| A_21_P0013244 | NM_001102594    | DTX2         | deltex homolog 2 (Drosophila)                                         | ENST00000456590 | 0,583478421 |
| A_23_P162589  | NM_001017535    | VDR          | vitamin D (1,25- dihydroxyvitamin D3) receptor                        | ENST00000229022 | 0,58323879  |
| A_33_P3388147 | NM_001166694    | CHRNA3       | cholinergic receptor, nicotinic, alpha 3                              | ENST00000348639 | 0,583157941 |
| A_33_P3293403 | NM_001099279    | FOXD4L2      | forkhead box D4-like 2                                                | ENST00000377413 | 0,583117145 |
| A_33_P3342802 | AK091259        | LOC649294    | uncharacterized LOC649294                                             |                 | 0,583066972 |
| A_23_P106002  | NM_020529       | NFKBIA       | nuclear factor of kappa light polypeptide gene enhancer in I          | ENST00000554001 | 0,582756562 |
| A_23_P200772  | NM_201269       | ZNF644       | zinc finger protein 644                                               | ENST00000337393 | 0,582682093 |
| A_33_P3278877 | NM_002942       | ROBO2        | roundabout, axon guidance receptor, homolog 2 (Drosophil              | ENST00000398467 | 0,582624728 |
| A_33_P3421325 | NM_001001662    | ZNF782       | zinc finger protein 782                                               | ENST00000478850 | 0,582308467 |
| A_21_P0014494 | XR_110082       | LOC100507619 | uncharacterized LOC100507619                                          | ENST00000505151 | 0,582136355 |



|               |                   |                |                                                              |                 |             |
|---------------|-------------------|----------------|--------------------------------------------------------------|-----------------|-------------|
| A_23_P353316  | NM_020429         | SMURF1         | SMAD specific E3 ubiquitin protein ligase 1                  | ENST00000361125 | 0,58212724  |
| A_23_P208325  | NM_004234         | ZNF235         | zinc finger protein 235                                      | ENST00000291182 | 0,58206246  |
| A_23_P120153  | NM_173647         | RNF149         | ring finger protein 149                                      | ENST00000295317 | 0,582016783 |
| A_33_P3219840 | NR_026751         | ZNRD1-AS1      | ZNRD1 antisense RNA 1 (non-protein coding)                   | ENST00000413935 | 0,581881699 |
| A_21_P0002169 | TCONS_00003571    | XLOC_001342    |                                                              |                 | 0,581728113 |
| A_21_P0003211 | ENST00000512335   | XLOC_003406    |                                                              | ENST00000512335 | 0,581630194 |
| A_21_P0011487 | THC2630320        | XLOC_I2_005517 |                                                              |                 | 0,581583919 |
| A_23_P106002  | NM_020529         | NFKBIA         | nuclear factor of kappa light polypeptide gene enhancer in I | ENST00000554001 | 0,581541954 |
| A_23_P106798  | NM_003031         | SIAH1          | seven in absentia homolog 1 (Drosophila)                     | ENST00000356721 | 0,581526949 |
| A_32_P46191   | NM_001159522      | ZNF727         | zinc finger protein 727                                      | ENST00000550760 | 0,581478582 |
| A_21_P0004714 | BX088681          | XLOC_005564    |                                                              |                 | 0,581405723 |
| A_24_P401830  | NR_034182         | LOC100129196   | uncharacterized LOC100129196                                 | ENST00000414532 | 0,581033363 |
| A_23_P393401  | NR_003610         | PDXDC2P        | pyridoxal-dependent decarboxylase domain containing 2, p     | ENST00000531894 | 0,580965667 |
| A_23_P127352  | NM_198923         | MRGPRD         | MAS-related GPR, member D                                    | ENST00000309106 | 0,580963132 |
| A_21_P0010636 | TCONS_I2_00001394 | XLOC_I2_001011 |                                                              |                 | 0,580961296 |
| A_21_P0000135 | NM_024668         | ANKHD1         | ankyrin repeat and KH domain containing 1                    | ENST00000394723 | 0,580756634 |
| A_21_P0009781 | GU357550          | XLOC_012981    |                                                              |                 | 0,580749044 |
| A_33_P3209005 | AK097159          | ZNF673         | zinc finger family member 673                                |                 | 0,580683542 |
| A_21_P0007252 | TCONS_00019425    | XLOC_009243    |                                                              |                 | 0,580587226 |
| A_24_P691775  | NR_037596         | FLJ14186       | uncharacterized LOC401149                                    |                 | 0,580354357 |
| A_33_P3305625 | AK124509          | LOC100131015   | uncharacterized LOC100131015                                 |                 | 0,580236987 |
| A_23_P2294    | NM_033647         | HELB           | helicase (DNA) B                                             | ENST00000440906 | 0,58016496  |
| A_23_P149419  | NM_022078         | GPATCH3        | G patch domain containing 3                                  | ENST00000536641 | 0,580152788 |
| A_23_P106002  | NM_020529         | NFKBIA         | nuclear factor of kappa light polypeptide gene enhancer in I | ENST00000554001 | 0,580073757 |
| A_33_P3407339 | NM_206921         | C6orf204       | chromosome 6 open reading frame 204                          | ENST00000392500 | 0,580022295 |
| A_21_P0008926 | THC2772690        | XLOC_011704    |                                                              |                 | 0,579936714 |
| A_23_P322845  | NM_001102559      | PPAPDC1B       | phosphatidic acid phosphatase type 2 domain containing 1E    | ENST00000424479 | 0,57986788  |
| A_33_P3216458 | NM_003812         | ADAM23         | ADAM metallopeptidase domain 23                              | ENST00000374416 | 0,579857763 |
| A_24_P384397  | NM_133452         | RAVER1         | ribonucleoprotein, PTB-binding 1                             | ENST00000331131 | 0,57975145  |

|                |                |              |                                                              |                 |             |
|----------------|----------------|--------------|--------------------------------------------------------------|-----------------|-------------|
| A_23_P50508    | NM_003706      | PLA2G4C      | phospholipase A2, group IVC (cytosolic, calcium-independent) | ENST00000354276 | 0,579742935 |
| A_33_P3387756  | NM_001007125   | C20orf201    | chromosome 20 open reading frame 201                         | ENST00000308906 | 0,579628269 |
| A_23_P63153    | NM_007204      | DDX20        | DEAD (Asp-Glu-Ala-Asp) box polypeptide 20                    | ENST00000369702 | 0,579465677 |
| A_23_P106798   | NM_003031      | SIAH1        | seven in absentia homolog 1 (Drosophila)                     | ENST00000356721 | 0,579462755 |
| A_33_P3244083  | NM_015254      | KIF13B       | kinesin family member 13B                                    | ENST00000523968 | 0,579319862 |
| A_23_P200801   | NM_001002811   | PDE4DIP      | phosphodiesterase 4D interacting protein                     | ENST00000313431 | 0,57916602  |
| A_21_P0011373  | NR_040058      | LOC100505648 | uncharacterized LOC100505648                                 |                 | 0,579076433 |
| A_21_P0014271  | XR_109062      | LOC100506258 | uncharacterized LOC100506258                                 |                 | 0,578972078 |
| A_23_P100420   | NM_015144      | ZCCHC14      | zinc finger, CCHC domain containing 14                       | ENST00000268616 | 0,578921751 |
| A_23_P130836   | NM_005317      | GZMM         | granzyme M (lymphocyte met-ase 1)                            | ENST00000264553 | 0,578871541 |
| A_21_P0007412  | TCONS_00019784 | XLOC_009582  |                                                              |                 | 0,578755097 |
| A_23_P405216   | NM_001145083   | ZNF619       | zinc finger protein 619                                      | ENST00000314686 | 0,578702913 |
| A_21_P0000161  | NM_001204911   | C16orf57     | chromosome 16 open reading frame 57                          |                 | 0,578651144 |
| A_33_P3287078  | NM_022482      | GZF1         | GDNF-inducible zinc finger protein 1                         | ENST00000544236 | 0,57858543  |
| A_21_P0004025  | TCONS_00009445 | XLOC_004456  |                                                              |                 | 0,578476052 |
| A_21_P0003212  | AK126102       | XLOC_003406  |                                                              |                 | 0,578427766 |
| A_33_P3382944  | NM_198537      | YJEFN3       | YjeF N-terminal domain containing 3                          | ENST00000397179 | 0,578194854 |
| A_24_P356601   | NM_006460      | HEXIM1       | hexamethylene bis-acetamide inducible 1                      | ENST00000332499 | 0,578027216 |
| A_23_P100420   | NM_015144      | ZCCHC14      | zinc finger, CCHC domain containing 14                       | ENST00000268616 | 0,57784024  |
| A_23_P114349   | NM_130776      | XAGE3        | X antigen family, member 3                                   | ENST00000346279 | 0,57754926  |
| A_33_P3365870  | NM_001143888   | BSDC1        | BSD domain containing 1                                      | ENST00000325745 | 0,577377907 |
| A_23_P106798   | NM_003031      | SIAH1        | seven in absentia homolog 1 (Drosophila)                     | ENST00000356721 | 0,57735661  |
| A_23_P101476   | NM_030824      | ZNF442       | zinc finger protein 442                                      | ENST00000242804 | 0,577322331 |
| A_21_P0000807  | NR_038447      | LOC100130231 | uncharacterized LOC100130231                                 |                 | 0,577290324 |
| A_23_P94762    | NM_058230      | ZNF354B      | zinc finger protein 354B                                     | ENST00000322434 | 0,577241146 |
| A_21_P0000143  | NM_001199011   | DCTN5        | dynactin 5 (p25)                                             |                 | 0,577221921 |
| A_19_P00322291 | NR_036444      | LOC400550    | uncharacterized LOC400550                                    |                 | 0,577196635 |
| A_23_P70409    | NM_203290      | POLR1C       | polymerase (RNA) I polypeptide C, 30kDa                      | ENST00000488601 | 0,577186642 |
| A_23_P52885    | NM_024631      | C11orf61     | chromosome 11 open reading frame 61                          | ENST00000526629 | 0,577146446 |

|                |                 |                |                                                              |                 |             |
|----------------|-----------------|----------------|--------------------------------------------------------------|-----------------|-------------|
| A_19_P00318883 | NR_038361       | LOC100505854   | uncharacterized LOC100505854                                 |                 | 0,577081594 |
| A_23_P400603   | NR_015363       | MGC21881       | uncharacterized locus MGC21881                               | ENST00000450704 | 0,577068012 |
| A_21_P0005565  | DB461521        | XLOC_006132    |                                                              |                 | 0,577031003 |
| A_23_P34757    | NM_018040       | GPATCH2        | G patch domain containing 2                                  | ENST00000366935 | 0,576958332 |
| A_23_P106002   | NM_020529       | NFKBIA         | nuclear factor of kappa light polypeptide gene enhancer in I | ENST00000554001 | 0,576818495 |
| A_21_P0013961  | ENST00000456890 | LOC100506447   | uncharacterized protein LOC100506447                         | ENST00000456890 | 0,576655257 |
| A_21_P0000206  | NR_000006       | SNORD21        | small nucleolar RNA, C/D box 21                              | ENST00000497519 | 0,576455035 |
| A_33_P3232624  | NR_033908       | LOC100288069   | general transcription factor Ili pseudogene                  | ENST00000446912 | 0,576345091 |
| A_23_P111303   | NM_014892       | SCAF8          | SR-related CTD-associated factor 8                           | ENST00000417268 | 0,576244371 |
| A_21_P0000472  | NR_003701       | SNORD58C       | small nucleolar RNA, C/D box 58C                             |                 | 0,576211101 |
| A_24_P19268    | NM_182515       | ZNF714         | zinc finger protein 714                                      | ENST00000343332 | 0,576112838 |
| A_19_P00318280 | XR_108813       | LOC100506860   |                                                              |                 | 0,576089051 |
| A_23_P95736    | NM_001001415    | ZNF429         | zinc finger protein 429                                      | ENST00000358491 | 0,576088141 |
| A_19_P00319007 | NR_038889       | LOC401320      | uncharacterized LOC401320                                    | ENST00000426529 | 0,576083041 |
| A_33_P3382267  | NM_014866       | SEC16A         | SEC16 homolog A ( <i>S. cerevisiae</i> )                     | ENST00000404925 | 0,576081143 |
| A_23_P6223     | NM_020706       | SCAF4          | SR-related CTD-associated factor 4                           | ENST00000286835 | 0,575991184 |
| A_33_P3288649  | NM_018951       | HOXA10         | homeobox A10                                                 | ENST00000381834 | 0,575987866 |
| A_23_P166421   | NM_031937       | TBC1D10A       | TBC1 domain family, member 10A                               | ENST00000433426 | 0,57598539  |
| A_23_P5460     | NM_017521       | FEV            | FEV (ETS oncogene family)                                    | ENST00000295727 | 0,575966418 |
| A_21_P0010483  | BC037213        | LOC100271722   | uncharacterized LOC100271722                                 |                 | 0,57591462  |
| A_21_P0001931  | AK027541        | XLOC_001728    |                                                              |                 | 0,575667765 |
| A_21_P0012103  | ENST00000417006 | XLOC_I2_008405 |                                                              | ENST00000417006 | 0,57565157  |
| A_23_P106798   | NM_003031       | SIAH1          | seven in absentia homolog 1 ( <i>Drosophila</i> )            | ENST00000356721 | 0,57563436  |
| A_33_P3413404  | AK309987        | PARVB          | parvin, beta                                                 | ENST00000402876 | 0,575330989 |
| A_33_P3407105  | NM_017798       | YTHDF1         | YTH domain family, member 1                                  | ENST00000342761 | 0,575320724 |
| A_33_P3367899  | NM_005479       | FRAT1          | frequently rearranged in advanced T-cell lymphomas           | ENST00000371021 | 0,575233038 |
| A_19_P00318191 | NR_038889       | LOC401320      | uncharacterized LOC401320                                    | ENST00000434399 | 0,575129976 |
| A_24_P289273   | ENST00000372092 | RGR            | retinal G protein coupled receptor                           | ENST00000372092 | 0,575107152 |
| A_33_P3344492  | NR_002997       | SCARNA1        | small Cajal body-specific RNA 1                              |                 | 0,574812925 |

|               |                 |                |                                                                       |                 |             |
|---------------|-----------------|----------------|-----------------------------------------------------------------------|-----------------|-------------|
| A_23_P103276  | NM_138417       | KTI12          | KTI12 homolog, chromatin associated ( <i>S. cerevisiae</i> )          | ENST00000371614 | 0,574447347 |
| A_33_P3724157 | NM_198440       | DERL3          | Der1-like domain family, member 3                                     | ENST00000290730 | 0,574261831 |
| A_23_P120153  | NM_173647       | RNF149         | ring finger protein 149                                               | ENST00000295317 | 0,574231529 |
| A_23_P25121   | NM_016594       | FKBP11         | FK506 binding protein 11, 19 kDa                                      | ENST00000256680 | 0,574041522 |
| A_33_P3245674 | ENST00000500161 | ZNF329         | zinc finger protein 329                                               | ENST00000500161 | 0,573954563 |
| A_23_P100420  | NM_015144       | ZCCHC14        | zinc finger, CCHC domain containing 14                                | ENST00000268616 | 0,573735953 |
| A_23_P108699  | NM_000145       | FSHR           | follicle stimulating hormone receptor                                 | ENST00000541117 | 0,573615984 |
| A_33_P3316310 | NM_182501       | MTERFD2        | MTERF domain containing 2                                             | ENST00000475860 | 0,573544507 |
| A_23_P218317  | NM_001038618    | NARF           | nuclear prelamin A recognition factor                                 | ENST00000457415 | 0,573521845 |
| A_23_P103276  | NM_138417       | KTI12          | KTI12 homolog, chromatin associated ( <i>S. cerevisiae</i> )          | ENST00000371614 | 0,573335467 |
| A_23_P373799  | NM_020943       | CWC22          | CWC22 spliceosome-associated protein homolog ( <i>S. cerevisiae</i> ) | ENST00000295749 | 0,573267726 |
| A_21_P0012910 | ENST00000463434 | XLOC_I2_012081 |                                                                       | ENST00000463434 | 0,57319813  |
| A_33_P3238777 | NR_028324       | FLJ45445       | uncharacterized LOC399844                                             | ENST00000425496 | 0,572987126 |
| A_33_P3803667 | AK095441        | FLJ38122       | uncharacterized LOC401289                                             |                 | 0,572932824 |
| A_21_P0008747 | TCONS_00023697  | XLOC_011502    |                                                                       |                 | 0,572915572 |
| A_24_P218006  | NM_032317       | DNAJC30        | DnaJ (Hsp40) homolog, subfamily C, member 30                          |                 | 0,57282728  |
| A_21_P0009371 | TCONS_00025785  | XLOC_012594    |                                                                       |                 | 0,572754255 |
| A_33_P3244882 | NM_024852       | EIF2C3         | eukaryotic translation initiation factor 2C, 3                        | ENST00000324350 | 0,57274725  |
| A_24_P391991  | NR_028347       | FAM183B        | acyloxyacyl hydrolase (neutrophil)                                    | ENST00000409072 | 0,572610273 |
| A_23_P119196  | NM_016270       | KLF2           | Kruppel-like factor 2 (lung)                                          | ENST00000248071 | 0,572529683 |
| A_23_P64243   | NM_006760       | UPK2           | uroplakin 2                                                           | ENST00000264031 | 0,572458013 |
| A_21_P0000385 | NR_003069       | SNORD88C       | small nucleolar RNA, C/D box 88C                                      |                 | 0,572432647 |
| A_33_P3389917 | NM_000254       | MTR            | 5-methyltetrahydrofolate-homocysteine methyltransferase               | ENST00000366577 | 0,572413751 |
| A_33_P3270172 | NR_027022       | LOC127841      | uncharacterized LOC127841                                             |                 | 0,572342194 |
| A_33_P3264444 | ENST00000482292 | PFDN6          | prefoldin subunit 6                                                   | ENST00000482292 | 0,572297541 |
| A_24_P127075  | NM_022918       | TMEM135        | transmembrane protein 135                                             | ENST00000529023 | 0,572297523 |
| A_23_P111303  | NM_014892       | SCAF8          | SR-related CTD-associated factor 8                                    | ENST00000417268 | 0,572295214 |
| A_32_P144908  | NM_203282       | ZNF254         | zinc finger protein 254                                               | ENST00000357002 | 0,572205358 |
| A_32_P71447   | NM_015261       | NCAPD3         | non-SMC condensin II complex, subunit D3                              | ENST00000534548 | 0,57210759  |

|                |                |              |                                                             |                 |             |
|----------------|----------------|--------------|-------------------------------------------------------------|-----------------|-------------|
| A_21_P0009023  | BI055436       | XLOC_011924  |                                                             |                 | 0,571883034 |
| A_23_P102391   | NM_014585      | SLC40A1      | solute carrier family 40 (iron-regulated transporter), memb | ENST00000544056 | 0,571766631 |
| A_21_P0000312  | NR_002956      | SNORA14B     | small nucleolar RNA, H/ACA box 14B                          |                 | 0,571671441 |
| A_23_P120153   | NM_173647      | RNF149       | ring finger protein 149                                     | ENST00000295317 | 0,571468184 |
| A_21_P0008996  | THC2669746     | XLOC_011827  |                                                             |                 | 0,57130504  |
| A_23_P424561   | NM_133639      | RHOV         | ras homolog gene family, member V                           | ENST00000220507 | 0,571205538 |
| A_33_P3303176  | NM_001164377   | MRGPRG       | MAS-related GPR, member G                                   | ENST00000332314 | 0,57118645  |
| A_33_P3692979  | AK093862       | LOC283485    | uncharacterized LOC283485                                   |                 | 0,571064981 |
| A_33_P3329098  | NM_004906      | WTAP         | Wilms tumor 1 associated protein                            | ENST00000358372 | 0,571034416 |
| A_21_P0002165  | TCONS_00003563 | XLOC_001338  |                                                             |                 | 0,571010115 |
| A_23_P419239   | NM_018638      | ETNK1        | ethanolamine kinase 1                                       | ENST00000544191 | 0,570981632 |
| A_33_P3350202  | NM_014484      | MOCS3        | molybdenum cofactor synthesis 3                             | ENST00000244051 | 0,570860552 |
| A_33_P3274009  | AK124556       | LOC100132966 | uncharacterized LOC100132966                                |                 | 0,570803369 |
| A_21_P0014894  | XR_132878      | LOC100652757 | uncharacterized LOC100652757                                |                 | 0,570782177 |
| A_33_P3321369  | XR_109231      | LOC145757    | uncharacterized LOC145757                                   |                 | 0,570747513 |
| A_24_P203953   | BC037281       | LOC439951    | uncharacterized LOC439951                                   |                 | 0,570689994 |
| A_21_P0014042  | NM_001135844   | SIRPB1       | signal-regulatory protein beta 1                            | ENST00000381596 | 0,570665403 |
| A_23_P324718   | NM_203446      | SYNJ1        | synaptojanin 1                                              | ENST00000382499 | 0,570528251 |
| A_21_P0000398  | NR_003140      | SNORD117     | small nucleolar RNA, C/D box 117                            |                 | 0,57047596  |
| A_23_P109913   | NM_006564      | CXCR6        | chemokine (C-X-C motif) receptor 6                          | ENST00000438735 | 0,570384471 |
| A_23_P56833    | NM_016115      | ASB3         | ankyrin repeat and SOCS box containing 3                    | ENST00000470707 | 0,570374582 |
| A_21_P0001601  | TCONS_00001757 | XLOC_001125  |                                                             |                 | 0,570372601 |
| A_33_P3323902  | NM_001037804   | DEFB130      | defensin, beta 130                                          | ENST00000528518 | 0,570327203 |
| A_32_P163247   | NM_001768      | CD8A         | CD8a molecule                                               | ENST00000409511 | 0,570323012 |
| A_23_P120153   | NM_173647      | RNF149       | ring finger protein 149                                     | ENST00000295317 | 0,570230842 |
| A_33_P3346302  | NM_018449      | UBAP2        | ubiquitin associated protein 2                              | ENST00000351580 | 0,570169216 |
| A_19_P00317242 | XM_001716361   | LOC388210    | apolipoporphorins-like                                      |                 | 0,570144972 |
| A_33_P3306287  | NM_024086      | METTL16      | methyltransferase like 16                                   | ENST00000399834 | 0,570122282 |
| A_24_P408603   | NM_171998      | RAB39B       | RAB39B, member RAS oncogene family                          | ENST00000369454 | 0,569947724 |



|               |                  |                |                                                                 |                 |             |
|---------------|------------------|----------------|-----------------------------------------------------------------|-----------------|-------------|
| A_21_P0007318 | NR_033972        | LOC440028      | uncharacterized LOC440028                                       |                 | 0,569916052 |
| A_23_P162918  | NM_001085        | SERPINA3       | serpin peptidase inhibitor, clade A (alpha-1 antiproteinase,    | ENST00000555820 | 0,569843929 |
| A_21_P0000707 | NM_152644        | FAM24B         | family with sequence similarity 24, member B                    | ENST00000368896 | 0,569800495 |
| A_33_P3212500 | AK127934         | LOC100129060   | uncharacterized LOC100129060                                    |                 | 0,569666604 |
| A_21_P0014848 | ENST00000515591  | TMEM165        | transmembrane protein 165                                       | ENST00000515591 | 0,569598059 |
| A_32_P472875  | XR_132735        | LOC100132234   | uncharacterized LOC100132234                                    |                 | 0,569528497 |
| A_24_P355720  | NM_002007        | FGF4           | fibroblast growth factor 4                                      | ENST00000168712 | 0,569476304 |
| A_23_P120153  | NM_173647        | RNF149         | ring finger protein 149                                         | ENST00000295317 | 0,569440499 |
| A_23_P339687  | NM_138330        | ZNF675         | zinc finger protein 675                                         | ENST00000359788 | 0,569372341 |
| A_23_P167920  | NM_005618        | DLL1           | delta-like 1 (Drosophila)                                       | ENST00000366756 | 0,569345264 |
| A_33_P3357600 | NM_006458        | TRIM3          | tripartite motif containing 3                                   | ENST00000336043 | 0,569155858 |
| A_21_P0000109 | ENST00000544932  | MTRNR2L9       |                                                                 | ENST00000544932 | 0,569082368 |
| A_33_P3812815 | NM_000296        | PKD1           | polycystic kidney disease 1 (autosomal dominant)                | ENST00000537889 | 0,568916066 |
| A_24_P132813  | NM_001040103     | OPALIN         | oligodendrocytic myelin paranodal and inner loop protein        | ENST00000419479 | 0,568765065 |
| A_21_P0000558 | NR_028308        | LOC100302650   | uncharacterized LOC100302650                                    |                 | 0,568747702 |
| A_23_P45851   | NM_033055        | HIAT1          | hippocampus abundant transcript 1                               | ENST00000370152 | 0,568739933 |
| A_32_P122402  | NR_026792        | LOC441455      | makorin ring finger protein 1 pseudogene                        |                 | 0,568635279 |
| A_23_P100420  | NM_015144        | ZCCHC14        | zinc finger, CCHC domain containing 14                          | ENST00000268616 | 0,568581028 |
| A_32_P142881  | NM_015092        | SMG1           | smg-1 homolog, phosphatidylinositol 3-kinase-related kinase     | ENST00000378955 | 0,568565163 |
| A_21_P0000329 | NR_002974        | SNORA42        | small nucleolar RNA, H/ACA box 42                               |                 | 0,568552525 |
| A_23_P168629  | NM_018077        | RBM28          | RNA binding motif protein 28                                    | ENST00000481788 | 0,56844945  |
| A_23_P111919  | NM_013357        | PURG           | purine-rich element binding protein G                           | ENST00000475541 | 0,568126985 |
| A_23_P112412  | NM_017746        | TEX10          | testis expressed 10                                             | ENST00000444730 | 0,56792032  |
| A_33_P3350493 | NM_207409        | C6orf126       | chromosome 6 open reading frame 126                             | ENST00000481904 | 0,567754144 |
| A_21_P0001227 | ENST00000438158  | XLOC_001215    |                                                                 | ENST00000438158 | 0,567751345 |
| A_33_P3283616 | NM_002351        | SH2D1A         | SH2 domain containing 1A                                        | ENST00000360027 | 0,567659495 |
| A_23_P102391  | NM_014585        | SLC40A1        | solute carrier family 40 (iron-regulated transporter), member 1 | ENST00000544056 | 0,567649209 |
| A_21_P0010674 | TCONS_I2_0000180 | XLOC_I2_001332 |                                                                 |                 | 0,567607821 |
| A_23_P90172   | NM_014330        | PPP1R15A       | protein phosphatase 1, regulatory subunit 15A                   | ENST00000544084 | 0,567498947 |

|                |                 |                |                                                      |                 |             |
|----------------|-----------------|----------------|------------------------------------------------------|-----------------|-------------|
| A_33_P3235213  | NM_173799       | TIGIT          | T cell immunoreceptor with Ig and ITIM domains       | ENST00000485814 | 0,56747753  |
| A_21_P0013187  | ENST00000457000 | XLOC_I2_013315 |                                                      | ENST00000457000 | 0,567477111 |
| A_21_P0010318  | TCONS_00029256  | XLOC_014002    |                                                      |                 | 0,567420327 |
| A_23_P87879    | NM_001781       | CD69           | CD69 molecule                                        | ENST00000228434 | 0,567250187 |
| A_33_P3355266  | NM_022164       | TINAGL1        | tubulointerstitial nephritis antigen-like 1          | ENST00000481165 | 0,567230923 |
| A_23_P32785    | NM_173824       | C3orf38        | chromosome 3 open reading frame 38                   | ENST00000318887 | 0,567226879 |
| A_33_P3266489  | NM_001004486    | OR13H1         | olfactory receptor, family 13, subfamily H, member 1 | ENST00000338616 | 0,567177379 |
| A_23_P34142    | NM_016303       | WBP5           | WW domain binding protein 5                          | ENST00000372656 | 0,567123344 |
| A_33_P3406962  | ENST00000532977 | GATA4          | GATA binding protein 4                               | ENST00000532977 | 0,56710402  |
| A_23_P111303   | NM_014892       | SCAF8          | SR-related CTD-associated factor 8                   | ENST00000417268 | 0,567100969 |
| A_19_P00806962 | XR_109771       | LOC100506774   | uncharacterized LOC100506774                         |                 | 0,566991437 |
| A_33_P3240727  | NM_001080470    | ZNF697         | zinc finger protein 697                              | ENST00000421812 | 0,566958702 |
| A_21_P0002056  | ENST00000423539 | XLOC_002122    |                                                      | ENST00000423539 | 0,566951632 |
| A_24_P368943   | NM_001989       | EVX1           | even-skipped homeobox 1                              | ENST00000496902 | 0,566897045 |
| A_24_P29594    | NM_006620       | HBS1L          | HBS1-like ( <i>S. cerevisiae</i> )                   | ENST00000367837 | 0,566873689 |
| A_21_P0014375  | XR_109504       | LOC100506523   | uncharacterized LOC100506523                         |                 | 0,566791233 |
| A_21_P0003114  | XR_110050       | LOC100506301   | uncharacterized LOC100506301                         | ENST00000416124 | 0,566654964 |
| A_23_P436138   | NM_145114       | MAX            | MYC associated factor X                              | ENST00000246163 | 0,566605767 |
| A_33_P3323392  | XM_001716667    | LOC731932      | uncharacterized LOC731932                            |                 | 0,56659722  |
| A_21_P0013791  | ENST00000361381 | ND4            | NADH dehydrogenase, subunit 4 (complex I)            | ENST00000361381 | 0,566504781 |
| A_21_P0000359  | NR_003018       | SNORA71D       | small nucleolar RNA, H/ACA box 71D                   |                 | 0,566490642 |
| A_21_P0014747  | ENST00000437898 | LOC100652915   |                                                      | ENST00000437898 | 0,566401622 |
| A_23_P111303   | NM_014892       | SCAF8          | SR-related CTD-associated factor 8                   | ENST00000417268 | 0,566344069 |
| A_24_P185186   | NM_174920       | SAMD14         | sterile alpha motif domain containing 14             | ENST00000503131 | 0,566337673 |
| A_33_P3308706  | ENST00000525257 | USP47          | ubiquitin specific peptidase 47                      | ENST00000525257 | 0,56605575  |
| A_33_P3315375  | NM_001104587    | SLFN11         | schlafen family member 11                            | ENST00000394566 | 0,566027939 |
| A_21_P0000942  | ENST00000420406 | XLOC_000021    |                                                      | ENST00000420406 | 0,565796368 |
| A_24_P218814   | NM_002905       | RDH5           | retinol dehydrogenase 5 (11-cis/9-cis)               | ENST00000548123 | 0,565734936 |
| A_23_P37415    | NM_014701       | SECISBP2L      | SECIS binding protein 2-like                         | ENST00000380927 | 0,565654252 |

|                |                 |             |                                                              |                 |             |
|----------------|-----------------|-------------|--------------------------------------------------------------|-----------------|-------------|
| A_33_P3210916  | ENST00000479868 | SEC13       | SEC13 homolog (S. cerevisiae)                                | ENST00000479868 | 0,565580502 |
| A_21_P0000669  | NM_024580       | EFTUD1      | elongation factor Tu GTP binding domain containing 1         | ENST00000268206 | 0,565502493 |
| A_23_P106002   | NM_020529       | NFKBIA      | nuclear factor of kappa light polypeptide gene enhancer in I | ENST00000554001 | 0,565411793 |
| A_33_P3404508  | NM_001144027    | NDOR1       | NADPH dependent diflavin oxidoreductase 1                    | ENST00000344894 | 0,565384631 |
| A_19_P00315716 | NR_002911       | SNORA71A    |                                                              | ENST00000439912 | 0,565223031 |
| A_33_P3281552  | NM_001034853    | RPGR        | retinitis pigmentosa GTPase regulator                        | ENST00000378505 | 0,565159424 |
| A_33_P3371650  | BC052561        | STK17B      | serine/threonine kinase 17b                                  |                 | 0,565064223 |
| A_23_P355439   | NM_170745       | HIST1H2AA   | histone cluster 1, H2aa                                      | ENST00000297012 | 0,565050643 |
| A_21_P0008759  | NM_024776       | PEAK1       | NKF3 kinase family member                                    |                 | 0,564863714 |
| A_33_P3349045  | NM_001008699    | IL4R        | interleukin 4 receptor                                       | ENST00000380925 | 0,564573312 |
| A_23_P111303   | NM_014892       | SCAF8       | SR-related CTD-associated factor 8                           | ENST00000417268 | 0,564423136 |
| A_23_P40956    | NM_016362       | GHRL        | ghrelin/obestatin prepropeptide                              | ENST00000287656 | 0,564406196 |
| A_33_P3313559  | AK126336        | ORMDL1      | ORM1-like 1 (S. cerevisiae)                                  | ENST00000409519 | 0,564398758 |
| A_21_P0000608  | NR_033865       | CDRT15P2    | CMT1A duplicated region transcript 15 pseudogene 2           |                 | 0,56431611  |
| A_21_P0003882  | TCONS_00009003  | XLOC_003849 |                                                              |                 | 0,564235631 |
| A_23_P156218   | NM_002104       | GZMK        | granzyme K (granzyme 3; tryptase II)                         | ENST00000231009 | 0,564185438 |
| A_21_P0004097  | BC030121        | XLOC_004726 |                                                              | ENST00000514869 | 0,564068167 |
| A_33_P3372526  | ENST00000392214 | MDH1B       | malate dehydrogenase 1B, NAD (soluble)                       | ENST00000392214 | 0,563753993 |
| A_32_P68148    | NR_027130       | ZNF738      | zinc finger protein 738                                      |                 | 0,563672955 |
| A_33_P3260747  | ENST00000373677 | NHSL2       | NHS-like 2                                                   | ENST00000373677 | 0,563610219 |
| A_24_P267997   | NM_015602       | TOR1AIP1    | torsin A interacting protein 1                               | ENST00000325993 | 0,563524643 |
| A_23_P402331   | NM_145652       | WFDC5       | WAP four-disulfide core domain 5                             | ENST00000372789 | 0,563351967 |
| A_33_P3338152  | ENST00000457865 | HIF3A       | hypoxia inducible factor 3, alpha subunit                    | ENST00000457865 | 0,563295754 |
| A_23_P160226   | NM_001039464    | HEATR8      | HEAT repeat containing 8                                     | ENST00000421030 | 0,563204806 |
| A_33_P3286739  | ENST00000343281 | N4BP2L1     | NEDD4 binding protein 2-like 1                               | ENST00000343281 | 0,563187078 |
| A_19_P00319226 | NR_026867       | ZNF300P1    |                                                              | ENST00000520773 | 0,563080144 |
| A_23_P93082    | NM_138459       | NUS1        | nuclear undecaprenyl pyrophosphate synthase 1 homolog (      | ENST00000368494 | 0,563003975 |
| A_33_P3332215  | NM_001044392    | MUC1        | mucin 1, cell surface associated                             | ENST00000342482 | 0,562953999 |
| A_23_P317056   | ENST00000361681 | ND6         | NADH dehydrogenase, subunit 6 (complex I)                    | ENST00000361681 | 0,562924264 |

|               |                                 |              |                                                             |                 |             |
|---------------|---------------------------------|--------------|-------------------------------------------------------------|-----------------|-------------|
| A_23_P128375  | NM_032829                       | C12orf34     | chromosome 12 open reading frame 34                         | ENST00000358906 | 0,562858378 |
| A_23_P407992  | NM_020825                       | CRAMP1L      | Crm, cramped-like (Drosophila)                              | ENST00000436138 | 0,562787466 |
| A_33_P3269134 | ENST00000409725                 | IWS1         | IWS1 homolog (S. cerevisiae)                                | ENST00000409725 | 0,562627047 |
| A_23_P135857  | NM_004836                       | EIF2AK3      | eukaryotic translation initiation factor 2-alpha kinase 3   | ENST00000303236 | 0,562605451 |
| A_32_P405973  | NM_020546                       | ADCY2        | adenylate cyclase 2 (brain)                                 | ENST00000338316 | 0,562585056 |
| A_24_P942743  | NM_003411                       | ZFY          | zinc finger protein, Y-linked                               | ENST00000155093 | 0,562491954 |
| A_23_P111395  | NM_003058                       | SLC22A2      | solute carrier family 22 (organic cation transporter), memb | ENST00000498556 | 0,562469586 |
| A_21_P0001693 | TCONS_00002090                  | XLOC_000294  |                                                             |                 | 0,562451089 |
| A_21_P0011979 | TCONS_I2_0001499(XLOC_I2_008352 |              |                                                             |                 | 0,562447384 |
| A_23_P162589  | NM_001017535                    | VDR          | vitamin D (1,25- dihydroxyvitamin D3) receptor              | ENST00000229022 | 0,562371889 |
| A_23_P53663   | NM_002583                       | PAWR         | PRKC, apoptosis, WT1, regulator                             | ENST00000548075 | 0,562236978 |
| A_33_P3287661 | AK126997                        | LOC100130430 | uncharacterized LOC100130430                                |                 | 0,562225186 |
| A_23_P162589  | NM_001017535                    | VDR          | vitamin D (1,25- dihydroxyvitamin D3) receptor              | ENST00000229022 | 0,562160718 |
| A_23_P160336  | NM_020997                       | LEFTY1       | left-right determination factor 1                           | ENST00000272134 | 0,562158352 |
| A_23_P120153  | NM_173647                       | RNF149       | ring finger protein 149                                     | ENST00000295317 | 0,562063217 |
| A_21_P0006478 | TCONS_00017125                  | XLOC_007918  |                                                             |                 | 0,562018634 |
| A_33_P3354955 | NM_016649                       | ESF1         | ESF1, nucleolar pre-rRNA processing protein, homolog (S. c  | ENST00000202816 | 0,562014444 |
| A_33_P3301221 | AK128431                        | LOC100129110 | uncharacterized LOC100129110                                |                 | 0,561990157 |
| A_23_P337875  | NM_001040202                    | PAQR3        | progesterin and adipoQ receptor family member III           | ENST00000508599 | 0,56187259  |
| A_33_P3339231 | NM_173569                       | UBN2         | ubiquitin 2                                                 | ENST00000288561 | 0,561837592 |
| A_23_P162589  | NM_001017535                    | VDR          | vitamin D (1,25- dihydroxyvitamin D3) receptor              | ENST00000229022 | 0,561694184 |
| A_23_P67702   | NM_003429                       | ZNF85        | zinc finger protein 85                                      | ENST00000345030 | 0,561519884 |
| A_23_P100420  | NM_015144                       | ZCCHC14      | zinc finger, CCHC domain containing 14                      | ENST00000268616 | 0,561463786 |
| A_33_P3404824 | NM_001172831                    | ZNF300       | zinc finger protein 300                                     | ENST00000394226 | 0,561391412 |
| A_23_P132515  | NM_017699                       | SIDT1        | SID1 transmembrane family, member 1                         | ENST00000393830 | 0,561277136 |
| A_23_P351342  | NM_015164                       | PLEKHM2      | pleckstrin homology domain containing, family M (with RUF   | ENST00000477849 | 0,561256304 |
| A_33_P3570974 | BC043205                        | C8orf50      | chromosome 8 open reading frame 50                          |                 | 0,561236675 |
| A_23_P398770  | NM_001130864                    | PWWP2A       | PWWP domain containing 2A                                   | ENST00000307063 | 0,561236516 |
| A_24_P118489  | NM_001080435                    | WHAMM        | WAS protein homolog associated with actin, golgi membrar    | ENST00000234505 | 0,561176665 |

|               |                  |                |                                                                |                 |             |
|---------------|------------------|----------------|----------------------------------------------------------------|-----------------|-------------|
| A_21_P0003588 | ENST00000478425  | STIM2          | stromal interaction molecule 2                                 | ENST00000478425 | 0,561125539 |
| A_32_P116323  | NM_015092        | SMG1           | smg-1 homolog, phosphatidylinositol 3-kinase-related kinase    | ENST00000378955 | 0,561070718 |
| A_33_P3732854 | AY358215         | OR9H1P         | olfactory receptor, family 9, subfamily H, member 1 pseudogene |                 | 0,560955623 |
| A_33_P3243449 | NM_001252        | CD70           | CD70 molecule                                                  | ENST00000245903 | 0,560784822 |
| A_23_P119857  | NM_001008237     | TTC32          | tetratricopeptide repeat domain 32                             | ENST00000495698 | 0,560736731 |
| A_33_P3283992 | NM_024833        | ZNF671         | zinc finger protein 671                                        | ENST00000335820 | 0,560735631 |
| A_24_P229164  | NM_003959        | HIP1R          | huntingtin interacting protein 1 related                       | ENST00000536617 | 0,560723786 |
| A_21_P0010250 | NR_024028        | LINC00112      | long intergenic non-protein coding RNA 112                     | ENST00000432830 | 0,560627611 |
| A_21_P0009153 | BC084573         | XLOC_012452    |                                                                |                 | 0,56062745  |
| A_21_P0005262 | ENST00000420268  | XLOC_006260    |                                                                | ENST00000420268 | 0,560625082 |
| A_23_P162589  | NM_001017535     | VDR            | vitamin D (1,25- dihydroxyvitamin D3) receptor                 | ENST00000229022 | 0,560572379 |
| A_23_P162589  | NM_001017535     | VDR            | vitamin D (1,25- dihydroxyvitamin D3) receptor                 | ENST00000229022 | 0,560482311 |
| A_33_P3302676 | ENST00000485159  | TLE4           | transducin-like enhancer of split 4 (E(sp1) homolog, Drosop    | ENST00000485159 | 0,560347537 |
| A_33_P3772937 | AL133645         | KRT8P12        | keratin 8 pseudogene 12                                        |                 | 0,560121306 |
| A_21_P0011215 | ENST00000423575  | XLOC_I2_003897 |                                                                | ENST00000423575 | 0,560082692 |
| A_33_P3379001 | NM_133369        | UNC5A          | unc-5 homolog A (C. elegans)                                   | ENST00000329542 | 0,560049958 |
| A_23_P301340  | NM_144679        | C17orf56       | chromosome 17 open reading frame 56                            | ENST00000374769 | 0,560040446 |
| A_23_P120153  | NM_173647        | RNF149         | ring finger protein 149                                        | ENST00000295317 | 0,559852593 |
| A_23_P11070   | NM_032553        | GPR174         | G protein-coupled receptor 174                                 | ENST00000276077 | 0,559804844 |
| A_23_P335039  | NM_133474        | ZNF721         | zinc finger protein 721                                        | ENST00000338977 | 0,5597781   |
| A_24_P228579  | NM_024120        | C20orf7        | chromosome 20 open reading frame 7                             | ENST00000463598 | 0,559773717 |
| A_33_P3318444 | NM_001146684     | RNF222         | ring finger protein 222                                        | ENST00000399398 | 0,559710491 |
| A_21_P0011573 | TCONS_I2_0001112 | XLOC_I2_006013 |                                                                |                 | 0,559704758 |
| A_32_P489130  | NM_153252        | BRWD3          | bromodomain and WD repeat domain containing 3                  | ENST00000373275 | 0,559583802 |
| A_32_P139738  | NR_002827        | HERC2P4        | hect domain and RLD 2 pseudogene 4                             |                 | 0,559457061 |
| A_21_P0010926 | ENST00000438082  | XLOC_I2_001667 |                                                                | ENST00000438082 | 0,559452199 |
| A_23_P111303  | NM_014892        | SCAF8          | SR-related CTD-associated factor 8                             | ENST00000417268 | 0,559237276 |
| A_33_P3255755 | AK123337         | CROCCP2        | ciliary rootlet coiled-coil, rootletin pseudogene 2            |                 | 0,559213733 |
| A_23_P170820  | NM_001020658     | PUM1           | pumilio homolog 1 (Drosophila)                                 | ENST00000440538 | 0,559109376 |



|               |                 |                |                                                                 |                 |             |
|---------------|-----------------|----------------|-----------------------------------------------------------------|-----------------|-------------|
| A_23_P114353  | NM_032946       | NXF5           | nuclear RNA export factor 5                                     | ENST00000263032 | 0,558888744 |
| A_24_P292470  | NM_022803       | UCP3           | uncoupling protein 3 (mitochondrial, proton carrier)            | ENST00000426995 | 0,558853811 |
| A_23_P80162   | NM_032405       | TMPRSS3        | transmembrane protease, serine 3                                | ENST00000478680 | 0,558786265 |
| A_23_P162589  | NM_001017535    | VDR            | vitamin D (1,25- dihydroxyvitamin D3) receptor                  | ENST00000229022 | 0,55871586  |
| A_33_P3237567 | ENST00000464610 | HLA-A          | major histocompatibility complex, class I, A                    | ENST00000464610 | 0,558628687 |
| A_21_P0010794 | ENST00000411733 | XLOC_I2_001399 |                                                                 | ENST00000411733 | 0,558621714 |
| A_24_P400473  | NM_014655       | SLC25A44       | solute carrier family 25, member 44                             | ENST00000469537 | 0,558615611 |
| A_21_P0010507 | ENST00000424215 | XLOC_I2_000033 |                                                                 | ENST00000424215 | 0,558490866 |
| A_33_P3312182 | NM_153256       | C10orf47       | chromosome 10 open reading frame 47                             | ENST00000379208 | 0,558469187 |
| A_33_P3358243 | NM_020702       | KIAA1161       | KIAA1161                                                        | ENST00000297625 | 0,55844992  |
| A_23_P162589  | NM_001017535    | VDR            | vitamin D (1,25- dihydroxyvitamin D3) receptor                  | ENST00000229022 | 0,558445116 |
| A_33_P3299781 | ENST00000380201 | DDRGK1         | DDRGK domain containing 1                                       | ENST00000380201 | 0,558425386 |
| A_33_P3708413 | NM_003480       | MFAP5          | microfibrillar associated protein 5                             | ENST00000540087 | 0,558324253 |
| A_33_P3401317 | NM_001145442    | POTEM          | POTE ankyrin domain family, member M                            | ENST00000409832 | 0,558043488 |
| A_21_P0001949 | ENST00000447194 | XLOC_001795    |                                                                 | ENST00000447194 | 0,557927601 |
| A_33_P3270429 | ENST00000383773 | NR1D2          | nuclear receptor subfamily 1, group D, member 2                 | ENST00000383773 | 0,557870005 |
| A_33_P3347437 | NR_033830       | FLJ39080       | uncharacterized LOC441355                                       | ENST00000523118 | 0,557843389 |
| A_21_P0001893 | ENST00000452037 | XLOC_001609    |                                                                 | ENST00000452037 | 0,557840447 |
| A_21_P0003243 | THC2496390      | XLOC_002730    |                                                                 |                 | 0,557739645 |
| A_21_P0014000 | NM_006737       | KIR3DL2        | killer cell immunoglobulin-like receptor, three domains, low    | ENST00000402254 | 0,557635776 |
| A_33_P3418130 | NM_145052       | UPRT           | uracil phosphoribosyltransferase (FUR1) homolog (S. cerevisiae) | ENST00000373373 | 0,557588695 |
| A_23_P113462  | NM_017641       | KIF21A         | kinesin family member 21A                                       | ENST00000395670 | 0,557520483 |
| A_33_P3382143 | NM_001243466    | STARD13        | StAR-related lipid transfer (START) domain containing 13        | ENST00000399364 | 0,557519446 |
| A_33_P3361584 | AK126579        | LOC100130930   | uncharacterized LOC100130930                                    |                 | 0,557387811 |
| A_33_P3261695 | NM_001195082    | TEX22          | testis expressed 22                                             | ENST00000548638 | 0,557330334 |
| A_23_P122615  | NM_032870       | PNISR          | PNN-interacting serine/arginine-rich protein                    | ENST00000438806 | 0,557257887 |
| A_23_P100420  | NM_015144       | ZCCHC14        | zinc finger, CCHC domain containing 14                          | ENST00000268616 | 0,557194656 |
| A_33_P3385765 | NM_001012753    | ZNF763         | zinc finger protein 763                                         |                 | 0,557088559 |
| A_23_P425116  | NM_016512       | SPAG11B        | sperm associated antigen 11B                                    | ENST00000528168 | 0,556872877 |

|               |                 |                |                                                                               |                 |             |
|---------------|-----------------|----------------|-------------------------------------------------------------------------------|-----------------|-------------|
| A_23_P100420  | NM_015144       | ZCCHC14        | zinc finger, CCHC domain containing 14                                        | ENST00000268616 | 0,556840827 |
| A_33_P3329592 | NM_212550       | BLOC1S3        | biogenesis of lysosomal organelles complex-1, subunit 3                       | ENST00000433642 | 0,556785408 |
| A_23_P78438   | NM_018255       | ELP2           | elongation protein 2 homolog (S. cerevisiae)                                  | ENST00000544274 | 0,556767052 |
| A_23_P431853  | ENST00000361453 | ND2            | MTND2                                                                         | ENST00000361453 | 0,556448958 |
| A_23_P119857  | NM_001008237    | TTC32          | tetratricopeptide repeat domain 32                                            | ENST00000495698 | 0,556374509 |
| A_21_P0004245 | ENST00000508795 | ZNF131         | zinc finger protein 131                                                       | ENST00000508795 | 0,556272266 |
| A_21_P0010239 | ENST00000422473 | XLOC_013931    |                                                                               | ENST00000422473 | 0,556242711 |
| A_23_P52531   | NM_152644       | FAM24B         | family with sequence similarity 24, member B                                  | ENST00000368896 | 0,556207751 |
| A_21_P0005219 | ENST00000442800 | XLOC_006035    |                                                                               | ENST00000442800 | 0,556182312 |
| A_33_P3262118 | ENST00000314174 | LUZP1          | leucine zipper protein 1                                                      | ENST00000314174 | 0,556115293 |
| A_32_P219148  | BC030211        | LOC497257      | uncharacterized LOC497257                                                     |                 | 0,556107012 |
| A_21_P0010284 | TCONS_00029142  | XLOC_014082    |                                                                               |                 | 0,556074145 |
| A_33_P3371752 | ENST00000371727 | EPS15          | epidermal growth factor receptor pathway substrate 15                         | ENST00000371727 | 0,556006974 |
| A_23_P217098  | NM_033305       | VPS13A         | vacuolar protein sorting 13 homolog A (S. cerevisiae)                         | ENST00000376636 | 0,55599214  |
| A_23_P102391  | NM_014585       | SLC40A1        | solute carrier family 40 (iron-regulated transporter), memb                   | ENST00000544056 | 0,555952397 |
| A_21_P0014704 | XR_112198       | LOC100509671   | uncharacterized LOC100509671                                                  |                 | 0,555951866 |
| A_33_P3424267 | NM_001083601    | NAA60          | N(alpha)-acetyltransferase 60, NatF catalytic subunit                         | ENST00000360862 | 0,555921657 |
| A_33_P3559138 | AK124194        | FLJ42200       | FLJ42200 protein                                                              |                 | 0,555772039 |
| A_23_P87879   | NM_001781       | CD69           | CD69 molecule                                                                 | ENST00000228434 | 0,555698337 |
| A_33_P3877728 | BX647090        | SMCR6          | Smith-Magenis syndrome chromosome region, candidate 6                         |                 | 0,555647563 |
| A_33_P3409467 | NM_000160       | GCGR           | glucagon receptor                                                             | ENST00000400723 | 0,555646649 |
| A_23_P102391  | NM_014585       | SLC40A1        | solute carrier family 40 (iron-regulated transporter), memb                   | ENST00000544056 | 0,55564603  |
| A_23_P105545  | NM_016830       | VAMP1          | vesicle-associated membrane protein 1 (synaptobrevin 1)                       | ENST00000535927 | 0,555616712 |
| A_21_P0006320 | ENST00000414976 | XLOC_007857    |                                                                               | ENST00000414976 | 0,555604247 |
| A_23_P31739   | NM_030795       | STMN4          | stathmin-like 4                                                               | ENST00000265770 | 0,555174161 |
| A_21_P0013266 | BQ926105        | XLOC_I2_013594 |                                                                               |                 | 0,555107499 |
| A_33_P3256894 | NM_001169107    | FAM21C         | family with sequence similarity 21, member C                                  | ENST00000434114 | 0,555052435 |
| A_21_P0009474 | TCONS_00026326  | XLOC_012666    |                                                                               |                 | 0,555041522 |
| A_33_P3317553 | NR_036650       | LOC100288615   | WAS protein homolog associated with actin, golgi membranes and microtubules p |                 | 0,554929488 |

|                |                 |                |                                                                 |                 |             |
|----------------|-----------------|----------------|-----------------------------------------------------------------|-----------------|-------------|
| A_33_P3293645  | XR_133104       | HYDIN2         | hydrocephalus inducing homolog 2 (mouse)                        |                 | 0,554890272 |
| A_23_P111811   | NM_019071       | ING3           | inhibitor of growth family, member 3                            | ENST00000427726 | 0,554791361 |
| A_21_P0009216  | TCONS_00025294  | XLOC_012099    |                                                                 |                 | 0,554725392 |
| A_23_P109913   | NM_006564       | CXCR6          | chemokine (C-X-C motif) receptor 6                              | ENST00000438735 | 0,554644104 |
| A_19_P00320434 | AK027541        | XLOC_001728    | 0                                                               |                 | 0,554536214 |
| A_21_P0001279  | TCONS_00000879  | XLOC_000118    |                                                                 |                 | 0,554385459 |
| A_21_P0001454  | TCONS_00001367  | XLOC_000667    |                                                                 |                 | 0,554312015 |
| A_23_P102391   | NM_014585       | SLC40A1        | solute carrier family 40 (iron-regulated transporter), member 1 | ENST00000544056 | 0,554083418 |
| A_32_P93852    | NM_138369       | BOD1           | biorientation of chromosomes in cell division 1                 | ENST00000285908 | 0,554079482 |
| A_33_P3236441  | NM_144972       | LDHAL6A        | lactate dehydrogenase A-like 6A                                 | ENST00000396213 | 0,55397556  |
| A_23_P205738   | NM_138576       | BCL11B         | B-cell CLL/lymphoma 11B (zinc finger protein)                   | ENST00000345514 | 0,553947113 |
| A_21_P0011558  | ENST00000434427 | XLOC_I2_005916 |                                                                 | ENST00000434427 | 0,553938981 |
| A_21_P0001041  | THC2664620      | XLOC_000505    |                                                                 |                 | 0,55392629  |
| A_23_P92424    | NM_020368       | UTP3           | UTP3, small subunit (SSU) processome component, homolog 1       | ENST00000254803 | 0,553754993 |
| A_21_P0009382  | AB593144        | XLOC_012142    |                                                                 |                 | 0,553744577 |
| A_33_P3282963  | ENST00000377259 | TJP2           | tight junction protein 2 (zona occludens 2)                     | ENST00000377259 | 0,553616642 |
| A_23_P217637   | NM_004085       | TIMM8A         | translocase of inner mitochondrial membrane 8 homolog A         | ENST00000372902 | 0,553549085 |
| A_23_P215048   | NM_014702       | KIAA0408       | KIAA0408                                                        | ENST00000368281 | 0,553497459 |
| A_33_P3317282  | NM_138459       | NUS1           | nuclear undecaprenyl pyrophosphate synthase 1 homolog (         | ENST00000368494 | 0,553409366 |
| A_19_P00320120 | NR_002323       | TUG1           |                                                                 |                 | 0,553260858 |
| A_23_P6293     | NM_018961       | UBASH3A        | ubiquitin associated and SH3 domain containing A                | ENST00000473381 | 0,55324745  |
| A_23_P102391   | NM_014585       | SLC40A1        | solute carrier family 40 (iron-regulated transporter), member 1 | ENST00000544056 | 0,553173228 |
| A_21_P0001457  | ENST00000449154 | XLOC_000676    |                                                                 | ENST00000449154 | 0,553173217 |
| A_23_P106798   | NM_003031       | SIAH1          | seven in absentia homolog 1 (Drosophila)                        | ENST00000356721 | 0,55313107  |
| A_33_P3271261  | NM_006181       | NTN3           | netrin 3                                                        | ENST00000293973 | 0,553097861 |
| A_21_P0011296  | THC2569926      | XLOC_I2_004594 |                                                                 |                 | 0,553059124 |
| A_21_P0000215  | NR_000015       | SNORD55        | small nucleolar RNA, C/D box 55                                 | ENST00000485390 | 0,552973086 |
| A_21_P0005703  | TCONS_00014724  | XLOC_006814    |                                                                 |                 | 0,552549223 |
| A_23_P93258    | NM_003537       | HIST1H3B       | histone cluster 1, H3b                                          | ENST00000244661 | 0,552517099 |

|                |                 |              |                                                            |                 |             |
|----------------|-----------------|--------------|------------------------------------------------------------|-----------------|-------------|
| A_33_P3390708  | NM_013390       | TMEM2        | transmembrane protein 2                                    | ENST00000474495 | 0,552441362 |
| A_19_P00803441 | NR_034130       | LOC100499194 | uncharacterized LOC100499194                               |                 | 0,552432089 |
| A_23_P117851   | NM_001030005    | CPLX3        | complexin 3                                                | ENST00000488000 | 0,55236457  |
| A_23_P111303   | NM_014892       | SCAF8        | SR-related CTD-associated factor 8                         | ENST00000417268 | 0,552274833 |
| A_21_P0007662  | TCONS_00020641  | XLOC_009943  |                                                            |                 | 0,552273835 |
| A_23_P111303   | NM_014892       | SCAF8        | SR-related CTD-associated factor 8                         | ENST00000417268 | 0,552268163 |
| A_32_P486620   | NM_173588       | IGSF22       | immunoglobulin superfamily, member 22                      | ENST00000319338 | 0,552256837 |
| A_23_P30547    | NM_005565       | LCP2         | lymphocyte cytosolic protein 2 (SH2 domain containing leuk | ENST00000520322 | 0,552227695 |
| A_23_P101623   | NM_022103       | ZNF667       | zinc finger protein 667                                    | ENST00000360227 | 0,552193606 |
| A_23_P101476   | NM_030824       | ZNF442       | zinc finger protein 442                                    | ENST00000242804 | 0,552154993 |
| A_33_P3359308  | NM_052920       | KLHL29       | kelch-like 29 (Drosophila)                                 | ENST00000486442 | 0,552138268 |
| A_23_P129577   | NM_033208       | TIGD7        | tigger transposable element derived 7                      | ENST00000426381 | 0,552069018 |
| A_33_P3391791  | NM_206809       | MOG          | myelin oligodendrocyte glycoprotein                        | ENST00000485211 | 0,551954375 |
| A_21_P0000230  | NR_001293       | SNORD107     | small nucleolar RNA, C/D box 107                           | ENST00000551361 | 0,551779603 |
| A_23_P100420   | NM_015144       | ZCCHC14      | zinc finger, CCHC domain containing 14                     | ENST00000268616 | 0,551669646 |
| A_32_P182394   | NM_021217       | ZNF77        | zinc finger protein 77                                     | ENST00000314531 | 0,551668054 |
| A_23_P10815    | NM_001020658    | PUM1         | pumilio homolog 1 (Drosophila)                             | ENST00000257075 | 0,551570245 |
| A_23_P107283   | NM_002145       | HOXB2        | homeobox B2                                                | ENST00000330070 | 0,551557017 |
| A_21_P0010302  | BM671314        | XLOC_014119  |                                                            |                 | 0,551303845 |
| A_23_P103276   | NM_138417       | KTI12        | KTI12 homolog, chromatin associated (S. cerevisiae)        | ENST00000371614 | 0,551296989 |
| A_33_P3299796  | ENST00000536349 | MAN1B1       | mannosidase, alpha, class 1B, member 1                     | ENST00000536349 | 0,551258111 |
| A_19_P00808213 | NM_178549       | ZNF678       |                                                            |                 | 0,551255829 |
| A_19_P00316286 | NR_038889       | LOC401320    | uncharacterized LOC401320                                  | ENST00000426529 | 0,551230337 |
| A_19_P00321781 | ENST00000554129 | LOC100506499 |                                                            | ENST00000554129 | 0,55111764  |
| A_33_P3334292  | AK123006        | PPIAL4G      | peptidylprolyl isomerase A (cyclophilin A)-like 4G         |                 | 0,550996387 |
| A_33_P3276153  | NR_027024       | LOC645752    | golgi autoantigen, golgin subfamily a, 6 pseudogene        |                 | 0,550910688 |
| A_23_P101476   | NM_030824       | ZNF442       | zinc finger protein 442                                    | ENST00000242804 | 0,550656391 |
| A_23_P428184   | NM_021065       | HIST1H2AD    | histone cluster 1, H2ad                                    | ENST00000341023 | 0,550578175 |
| A_33_P3228739  | NM_001195545    | LRR3C        | leucine rich repeat containing 3C                          | ENST00000377924 | 0,550541634 |

|                |                  |                |                                                                 |                 |             |
|----------------|------------------|----------------|-----------------------------------------------------------------|-----------------|-------------|
| A_33_P3254695  | NR_004404        | RNU105A        | RNA, U105A small nucleolar                                      | ENST00000437681 | 0,550450697 |
| A_21_P0014624  | XR_110599        | LOC100505661   | uncharacterized LOC100505661                                    |                 | 0,550432863 |
| A_23_P367043   | NR_003595        | CDC14C         | CDC14 cell division cycle 14 homolog C ( <i>S. cerevisiae</i> ) |                 | 0,550304053 |
| A_21_P0000223  | NR_000025        | SNORD15B       | small nucleolar RNA, C/D box 15B                                |                 | 0,550296429 |
| A_21_P0014409  | XR_109636        | LOC100506553   | uncharacterized LOC100506553                                    | ENST00000456721 | 0,550238465 |
| A_23_P103276   | NM_138417        | KTI12          | KTI12 homolog, chromatin associated ( <i>S. cerevisiae</i> )    | ENST00000371614 | 0,550147951 |
| A_19_P00319108 | NR_038889        | LOC401320      | uncharacterized LOC401320                                       | ENST00000434399 | 0,550096443 |
| A_21_P0006533  | THC2774401       | XLOC_008163    |                                                                 |                 | 0,550093446 |
| A_23_P106798   | NM_003031        | SIAH1          | seven in absentia homolog 1 ( <i>Drosophila</i> )               | ENST00000356721 | 0,550045218 |
| A_21_P0013220  | BI830525         | XLOC_I2_013456 |                                                                 |                 | 0,54999462  |
| A_23_P101811   | NM_021030        | ZNF14          | zinc finger protein 14                                          | ENST00000344099 | 0,549949589 |
| A_21_P0000304  | NR_002922        | SNORA13        | small nucleolar RNA, H/ACA box 13                               |                 | 0,549936163 |
| A_33_P3413759  | NM_001010887     | ACER2          | alkaline ceramidase 2                                           | ENST00000380376 | 0,549915974 |
| A_23_P111865   | NM_145914        | ZSCAN21        | zinc finger and SCAN domain containing 21                       | ENST00000292450 | 0,549840612 |
| A_21_P0012964  | ENST00000504512  | XLOC_I2_011854 |                                                                 | ENST00000504512 | 0,54982754  |
| A_23_P119857   | NM_001008237     | TTC32          | tetratricopeptide repeat domain 32                              | ENST00000495698 | 0,549821995 |
| A_33_P3276364  | ENST00000367913  | HSD17B7        | hydroxysteroid (17-beta) dehydrogenase 7                        | ENST00000367913 | 0,549768543 |
| A_23_P102391   | NM_014585        | SLC40A1        | solute carrier family 40 (iron-regulated transporter), memb     | ENST00000544056 | 0,549726115 |
| A_21_P0004063  | ENST00000503470  | XLOC_004557    |                                                                 | ENST00000503470 | 0,549710693 |
| A_33_P3312504  | NM_012455        | PSD4           | pleckstrin and Sec7 domain containing 4                         | ENST00000409656 | 0,549693067 |
| A_33_P3846653  | NR_036685        | KRT19P2        | keratin 19 pseudogene 2                                         | ENST00000405395 | 0,549660967 |
| A_21_P0000494  | NR_004389        | SNORA16B       | small nucleolar RNA, H/ACA box 16B                              |                 | 0,54951165  |
| A_33_P3419835  | NR_024348        | FBXL19-AS1     | FBXL19 antisense RNA 1 (non-protein coding)                     |                 | 0,549454178 |
| A_23_P119857   | NM_001008237     | TTC32          | tetratricopeptide repeat domain 32                              | ENST00000495698 | 0,549381379 |
| A_23_P38830    | NM_024762        | ZNF552         | zinc finger protein 552                                         | ENST00000391701 | 0,549349975 |
| A_21_P0010591  | TCONS_I2_0000096 | XLOC_I2_000727 |                                                                 |                 | 0,549328238 |
| A_33_P3375527  | NM_152622        | MIER3          | mesoderm induction early response 1, family member 3            | ENST00000381213 | 0,549299698 |
| A_33_P3217147  | NM_022078        | GPATCH3        | G patch domain containing 3                                     | ENST00000374122 | 0,549260045 |
| A_23_P122615   | NM_032870        | PNISR          | PNN-interacting serine/arginine-rich protein                    | ENST00000438806 | 0,549248041 |



|               |                |              |                                                                 |                 |             |
|---------------|----------------|--------------|-----------------------------------------------------------------|-----------------|-------------|
| A_23_P119857  | NM_001008237   | TTC32        | tetratricopeptide repeat domain 32                              | ENST00000495698 | 0,549219766 |
| A_33_P3294881 | NM_016474      | C3orf19      | chromosome 3 open reading frame 19                              | ENST00000285042 | 0,549203641 |
| A_23_P111811  | NM_019071      | ING3         | inhibitor of growth family, member 3                            | ENST00000427726 | 0,549177349 |
| A_23_P216225  | NM_004430      | EGR3         | early growth response 3                                         | ENST00000317216 | 0,549154503 |
| A_33_P3841819 | NR_027007      | LOC440944    | uncharacterized LOC440944                                       | ENST00000522221 | 0,549094464 |
| A_21_P0006243 | TCONS_00016231 | XLOC_007614  |                                                                 |                 | 0,549090963 |
| A_21_P0014311 | XR_109241      | LOC100507235 | uncharacterized LOC100507235                                    |                 | 0,548998696 |
| A_33_P3325355 | NM_006809      | TOMM34       | translocase of outer mitochondrial membrane 34                  | ENST00000372813 | 0,548980709 |
| A_21_P0014904 | XR_132901      | LOC100652738 | uncharacterized LOC100652738                                    |                 | 0,548884762 |
| A_23_P6836    | NM_016291      | IP6K2        | inositol hexakisphosphate kinase 2                              | ENST00000491686 | 0,548793399 |
| A_23_P87879   | NM_001781      | CD69         | CD69 molecule                                                   | ENST00000228434 | 0,548764865 |
| A_24_P331675  | NM_006781      | C6orf10      | chromosome 6 open reading frame 10                              | ENST00000305725 | 0,548685612 |
| A_21_P0000013 | NM_001145951   | TIMM8A       | translocase of inner mitochondrial membrane 8 homolog A (yeast) |                 | 0,548671593 |
| A_33_P3283611 | NM_001549      | IFIT3        | interferon-induced protein with tetratricopeptide repeats 3     | ENST00000543062 | 0,548529936 |
| A_23_P376799  | NM_015262      | FAM21C       | family with sequence similarity 21, member C                    | ENST00000471102 | 0,548353265 |
| A_23_P40956   | NM_016362      | GHRL         | ghrelin/obestatin prepropeptide                                 | ENST00000287656 | 0,548342462 |
| A_23_P302134  | NR_024279      | FLJ37453     | uncharacterized LOC729614                                       |                 | 0,548302401 |
| A_21_P0005271 | AI198554       | XLOC_006314  |                                                                 |                 | 0,548218686 |
| A_33_P3248863 | NM_213597      | KRBA2        | KRAB-A domain containing 2                                      | ENST00000331336 | 0,548119709 |
| A_33_P3248900 | NR_028324      | FLJ45445     | uncharacterized LOC399844                                       | ENST00000425496 | 0,548111158 |
| A_33_P3345816 | NM_001039966   | GPER         | G protein-coupled estrogen receptor 1                           | ENST00000342452 | 0,548090544 |
| A_21_P0000491 | NR_004383      | SNAR-G1      | small ILF3/NF90-associated RNA G1                               |                 | 0,547775157 |
| A_21_P0000316 | NR_002960      | SNORA20      | small nucleolar RNA, H/ACA box 20                               |                 | 0,547773917 |
| A_23_P154972  | NM_080740      | ZNF280A      | zinc finger protein 280A                                        | ENST00000302097 | 0,547772443 |
| A_23_P111811  | NM_019071      | ING3         | inhibitor of growth family, member 3                            | ENST00000427726 | 0,547638967 |
| A_21_P0004824 | TCONS_00011651 | XLOC_005133  |                                                                 |                 | 0,547636201 |
| A_23_P87879   | NM_001781      | CD69         | CD69 molecule                                                   | ENST00000228434 | 0,547598717 |
| A_33_P3230176 | NM_033505      | EPT1         | ethanolaminephosphotransferase 1 (CDP-ethanolamine-sp           | ENST00000260585 | 0,547535851 |
| A_33_P3411315 | NM_033185      | KRTAP3-3     | keratin associated protein 3-3                                  | ENST00000391586 | 0,547472151 |

|               |                 |              |                                                                    |                 |             |
|---------------|-----------------|--------------|--------------------------------------------------------------------|-----------------|-------------|
| A_23_P10815   | NM_001020658    | PUM1         | pumilio homolog 1 (Drosophila)                                     | ENST00000257075 | 0,54745378  |
| A_33_P3296499 | NM_002844       | PTPRK        | protein tyrosine phosphatase, receptor type, K                     | ENST00000368202 | 0,547290886 |
| A_24_P917178  | ENST00000472240 | MB           | myoglobin                                                          | ENST00000472240 | 0,547214226 |
| A_23_P98022   | NM_012238       | SIRT1        | sirtuin 1                                                          | ENST00000432464 | 0,547043616 |
| A_24_P152468  | XM_001718823    | LOC100134663 | uncharacterized LOC100134663                                       |                 | 0,547007148 |
| A_33_P3211078 | NM_003484       | HMGA2        | high mobility group AT-hook 2                                      | ENST00000537275 | 0,546935004 |
| A_23_P34930   | NM_005872       | BCAS2        | breast carcinoma amplified sequence 2                              | ENST00000485021 | 0,546913379 |
| A_23_P106798  | NM_003031       | SIAH1        | seven in absentia homolog 1 (Drosophila)                           | ENST00000356721 | 0,54655225  |
| A_33_P3267296 | NM_016594       | FKBP11       | FK506 binding protein 11, 19 kDa                                   | ENST00000547789 | 0,546533967 |
| A_21_P0001152 | ENST00000436200 | XLOC_000918  |                                                                    | ENST00000436200 | 0,546519745 |
| A_33_P3646051 | AK094324        | LOC284408    | uncharacterized LOC284408                                          |                 | 0,546458778 |
| A_21_P0011372 | NR_040058       | LOC100505648 | uncharacterized LOC100505648                                       |                 | 0,546441647 |
| A_33_P3213419 | AK054946        | LOC100129447 | uncharacterized LOC100129447                                       |                 | 0,546358379 |
| A_23_P308673  | NM_004783       | TAOK2        | TAO kinase 2                                                       | ENST00000279394 | 0,546329076 |
| A_33_P3412143 | NM_001080521    | RASSF10      | Ras association (RalGDS/AF-6) domain family (N-terminal) member 10 |                 | 0,546316721 |
| A_33_P3421219 | AK001442        | LOC647070    | uncharacterized LOC647070                                          |                 | 0,54628934  |
| A_23_P251785  | NM_024561       | NAA16        | N(alpha)-acetyltransferase 16, NatA auxiliary subunit              | ENST00000379406 | 0,546272013 |
| A_23_P48610   | NM_144568       | TMEM55B      | transmembrane protein 55B                                          | ENST00000557041 | 0,546199914 |
| A_23_P27894   | NM_014649       | SAFB2        | scaffold attachment factor B2                                      | ENST00000252542 | 0,546046395 |
| A_23_P101811  | NM_021030       | ZNF14        | zinc finger protein 14                                             | ENST00000344099 | 0,546031551 |
| A_21_P0002212 | XR_109987       | LOC100506235 | uncharacterized LOC100506235                                       |                 | 0,545962122 |
| A_23_P319565  | NM_170753       | PGBD3        | piggyBac transposable element derived 3                            | ENST00000508005 | 0,545950133 |
| A_33_P3365985 | XR_132811       | LOC401357    | uncharacterized LOC401357                                          |                 | 0,545944532 |
| A_21_P0002388 | ENST00000450397 | XLOC_001960  |                                                                    | ENST00000450397 | 0,545874393 |
| A_32_P19716   | NM_001080470    | ZNF697       | zinc finger protein 697                                            | ENST00000421812 | 0,545838702 |
| A_23_P162589  | NM_001017535    | VDR          | vitamin D (1,25- dihydroxyvitamin D3) receptor                     | ENST00000229022 | 0,545818506 |
| A_23_P29079   | NM_002626       | PFKL         | phosphofructokinase, liver                                         | ENST00000495274 | 0,545790548 |
| A_23_P173     | NM_001231       | CASQ1        | calsequestrin 1 (fast-twitch, skeletal muscle)                     | ENST00000368079 | 0,545711632 |
| A_23_P254212  | NM_013347       | RPA4         | replication protein A4, 30kDa                                      | ENST00000373040 | 0,545694966 |

|                |                  |                |                                                                      |                 |             |
|----------------|------------------|----------------|----------------------------------------------------------------------|-----------------|-------------|
| A_21_P0006560  | ENST00000447570  | XLOC_007960    |                                                                      | ENST00000447570 | 0,545518977 |
| A_33_P3390027  | ENST00000405068  | EXOC7          | exocyst complex component 7                                          | ENST00000405068 | 0,54545402  |
| A_23_P116168   | NM_032424        | KIAA1826       | KIAA1826                                                             | ENST00000301919 | 0,545143114 |
| A_24_P8109     | NM_001012302     | ANO9           | anoctamin 9                                                          | ENST00000524802 | 0,545062904 |
| A_32_P309662   | NM_176881        | TAS2R39        | taste receptor, type 2, member 39                                    | ENST00000446620 | 0,545007644 |
| A_33_P3417650  | NM_002776        | KLK10          | kallikrein-related peptidase 10                                      | ENST00000309958 | 0,54499072  |
| A_23_P403745   | NM_138383        | MTSS1L         | metastasis suppressor 1-like                                         | ENST00000254951 | 0,544516934 |
| A_21_P0011308  | NR_038253        | LOC100288637   | OTU domain containing 7A pseudogene                                  |                 | 0,544492828 |
| A_23_P10815    | NM_001020658     | PUM1           | pumilio homolog 1 (Drosophila)                                       | ENST00000257075 | 0,54435995  |
| A_33_P3393734  | ENST00000392558  | RPS27          | ribosomal protein S27                                                | ENST00000392558 | 0,544334245 |
| A_21_P0009808  | TCONS_00027830   | XLOC_013429    |                                                                      |                 | 0,544316822 |
| A_23_P119857   | NM_001008237     | TTC32          | tetratricopeptide repeat domain 32                                   | ENST00000495698 | 0,544245159 |
| A_21_P0011937  | TCONS_I2_0001471 | XLOC_I2_008140 |                                                                      |                 | 0,544230814 |
| A_24_P169073   | NM_182623        | FAM131C        | family with sequence similarity 131, member C                        | ENST00000375662 | 0,54421517  |
| A_33_P3441583  | BM453041         | SRGAP2P1       | SLIT-ROBO Rho GTPase activating protein 2 pseudogene 1               |                 | 0,544154097 |
| A_21_P0013535  | AL390183         | FAM66D         | family with sequence similarity 66, member D                         |                 | 0,544134793 |
| A_19_P00325015 | NR_002323        | TUG1           |                                                                      |                 | 0,54404814  |
| A_33_P3360785  | XR_109287        | LOC100128371   | uncharacterized LOC100128371                                         |                 | 0,543995608 |
| A_21_P0000562  | NR_028371        | FAS-AS1        | FAS antisense RNA 1 (non-protein coding)                             |                 | 0,543914727 |
| A_21_P0002306  | TCONS_00003916   | XLOC_001720    |                                                                      |                 | 0,543888199 |
| A_33_P3231613  | NM_001129828     | CSAG3          | CSAG family, member 3                                                | ENST00000356911 | 0,543834645 |
| A_23_P114185   | NM_004615        | TSPAN7         | tetraspanin 7                                                        | ENST00000422612 | 0,543792305 |
| A_23_P123848   | NM_032552        | DAB2IP         | DAB2 interacting protein                                             | ENST00000259371 | 0,543755059 |
| A_24_P71938    | NM_005900        | SMAD1          | SMAD family member 1                                                 |                 | 0,543708357 |
| A_33_P3244165  | NR_003287        | RN28S1         | RNA, 28S ribosomal 1                                                 |                 | 0,543605969 |
| A_23_P72462    | NM_173201        | ATP2A1         | ATPase, Ca <sup>++</sup> transporting, cardiac muscle, fast twitch 1 | ENST00000357084 | 0,543501458 |
| A_32_P57728    | NR_003613        | PMS2P1         | postmeiotic segregation increased 2 pseudogene 1                     |                 | 0,543479663 |
| A_21_P0011791  | ENST00000435062  | XLOC_I2_007184 |                                                                      | ENST00000435062 | 0,543448704 |
| A_21_P0012014  | ENST00000458149  | XLOC_I2_007449 |                                                                      | ENST00000458149 | 0,543364401 |

|                |                 |              |                                                               |  |                 |             |
|----------------|-----------------|--------------|---------------------------------------------------------------|--|-----------------|-------------|
| A_21_P0009486  | TCONS_00026340  | XLOC_012690  |                                                               |  |                 | 0,543110361 |
| A_33_P3315779  | NM_001165136    | HERC6        | hect domain and RLD 6                                         |  | ENST00000273960 | 0,543086807 |
| A_21_P0004924  | TCONS_00011925  | XLOC_005435  |                                                               |  |                 | 0,542905475 |
| A_21_P0000694  | NR_037858       | LOC254128    | uncharacterized LOC254128                                     |  |                 | 0,542895665 |
| A_32_P123088   | NM_001164468    | TMED7-TICAM2 | TMED7-TICAM2 readthrough                                      |  | ENST00000514548 | 0,542832427 |
| A_21_P0000882  | NR_040017       | LOC100507218 | uncharacterized LOC100507218                                  |  |                 | 0,542733602 |
| A_23_P105118   | NM_001005237    | OR51G1       | olfactory receptor, family 51, subfamily G, member 1          |  | ENST00000321961 | 0,542730916 |
| A_23_P134684   | NM_024567       | HMBOX1       | homeobox containing 1                                         |  | ENST00000521516 | 0,542634798 |
| A_23_P123424   | NM_000749       | CHRN3        | cholinergic receptor, nicotinic, beta 3                       |  | ENST00000289957 | 0,542594068 |
| A_21_P0007206  | TCONS_00019294  | XLOC_009122  |                                                               |  |                 | 0,542561503 |
| A_23_P159937   | NM_005629       | SLC6A8       | solute carrier family 6 (neurotransmitter transporter, creati |  | ENST00000253122 | 0,542554162 |
| A_23_P102109   | NM_006000       | TUBA4A       | tubulin, alpha 4a                                             |  | ENST00000490341 | 0,542499584 |
| A_33_P3314813  | NM_001080446    | C11orf94     | chromosome 11 open reading frame 94                           |  | ENST00000449465 | 0,54249796  |
| A_33_P3328937  | NM_001112707    | TLK2         | tousled-like kinase 2                                         |  | ENST00000542523 | 0,542478755 |
| A_33_P3318439  | NM_001131034    | RNF212       | ring finger protein 212                                       |  | ENST00000382968 | 0,54225977  |
| A_33_P3351934  | NR_024117       | MSTO2P       | misato homolog 2 pseudogene                                   |  |                 | 0,542158527 |
| A_33_P3276376  | ENST00000367915 | HSD17B7      | hydroxysteroid (17-beta) dehydrogenase 7                      |  | ENST00000367915 | 0,541848777 |
| A_23_P22364    | NM_000844       | GRM7         | glutamate receptor, metabotropic 7                            |  | ENST00000403881 | 0,541673123 |
| A_33_P3415321  | NR_002329       | ST7-OT4      | ST7 overlapping transcript 4 (non-protein coding)             |  | ENST00000397750 | 0,54162967  |
| A_21_P0002510  | TCONS_00004464  | XLOC_002342  |                                                               |  |                 | 0,541595656 |
| A_33_P3341722  | ENST00000407622 | COL23A1      | collagen, type XXIII, alpha 1                                 |  | ENST00000407622 | 0,541530032 |
| A_21_P0009166  | ENST00000447729 | XLOC_012176  |                                                               |  | ENST00000447729 | 0,541442115 |
| A_23_P10815    | NM_001020658    | PUM1         | pumilio homolog 1 (Drosophila)                                |  | ENST00000257075 | 0,541376589 |
| A_21_P0002167  | BC111372        | XLOC_001342  |                                                               |  |                 | 0,54135627  |
| A_21_P0000019  | NM_001146695    | KDM4C        | lysine (K)-specific demethylase 4C                            |  |                 | 0,54131507  |
| A_23_P29985    | AK022953        | METTL19      | methyltransferase like 19                                     |  |                 | 0,541161524 |
| A_21_P0009434  | TCONS_00026225  | XLOC_012600  |                                                               |  |                 | 0,541019969 |
| A_19_P00319633 | NR_037178       | LOC100294145 | uncharacterized LOC100294145                                  |  |                 | 0,540897269 |
| A_23_P147495   | NM_021946       | BCORL1       | BCL6 corepressor-like 1                                       |  | ENST00000303743 | 0,540758613 |

|                |                   |                |                                              |                 |  |             |
|----------------|-------------------|----------------|----------------------------------------------|-----------------|--|-------------|
| A_21_P0013304  | TCONS_I2_0002655: | XLOC_I2_013808 |                                              |                 |  | 0,540730267 |
| A_23_P418431   | NR_026784         | C6orf164       | chromosome 6 open reading frame 164          | ENST00000369572 |  | 0,540656095 |
| A_24_P217834   | NM_003530         | HIST1H3D       | histone cluster 1, H3d                       | ENST00000377831 |  | 0,540537762 |
| A_19_P00315452 | XR_110148         | LOC100130938   | uncharacterized LOC100130938                 |                 |  | 0,540323117 |
| A_23_P100420   | NM_015144         | ZCCHC14        | zinc finger, CCHC domain containing 14       | ENST00000268616 |  | 0,540311136 |
| A_23_P6413     | NM_080430         | SELM           | selenoprotein M                              | ENST00000490967 |  | 0,540280728 |
| A_32_P207428   | NM_138374         | ZNF845         | zinc finger protein 845                      | ENST00000427984 |  | 0,540241865 |
| A_33_P3409077  | NM_152730         | C6orf170       | chromosome 6 open reading frame 170          | ENST00000509492 |  | 0,540240495 |
| A_21_P0000212  | NR_000012         | SNORA68        | small nucleolar RNA, H/ACA box 68            |                 |  | 0,540049912 |
| A_23_P139786   | NM_003733         | OASL           | 2'-5'-oligoadenylate synthetase-like         | ENST00000257570 |  | 0,539963837 |
| A_21_P0011562  | TCONS_I2_0001102: | XLOC_I2_005933 |                                              |                 |  | 0,53995135  |
| A_23_P83714    | NM_173831         | ZNF707         | zinc finger protein 707                      | ENST00000533031 |  | 0,539880264 |
| A_33_P3350778  | NM_198535         | ZNF699         | zinc finger protein 699                      | ENST00000308650 |  | 0,539878627 |
| A_33_P3269278  | NM_153257         | ZNF461         | zinc finger protein 461                      | ENST00000396896 |  | 0,539801319 |
| A_21_P0000682  | NR_037642         | LOC100527964   | uncharacterized LOC100527964                 | ENST00000415414 |  | 0,539791305 |
| A_24_P134653   | NM_003611         | OFD1           | oral-facial-digital syndrome 1               | ENST00000464463 |  | 0,539695287 |
| A_33_P3284715  | NR_003001         | SCARNA7        | small Cajal body-specific RNA 7              |                 |  | 0,539592103 |
| A_33_P3395369  | NM_001634         | AMD1           | adenosylmethionine decarboxylase 1           | ENST00000368877 |  | 0,539472289 |
| A_21_P0002458  | TCONS_00004303    | XLOC_002153    |                                              |                 |  | 0,539461028 |
| A_23_P116168   | NM_032424         | KIAA1826       | KIAA1826                                     | ENST00000301919 |  | 0,539292185 |
| A_33_P3268629  | NR_026999         | LINC00265      | long intergenic non-protein coding RNA 265   |                 |  | 0,539231182 |
| A_24_P108863   | NM_001037540      | SCML1          | sex comb on midleg-like 1 (Drosophila)       | ENST00000398080 |  | 0,539131001 |
| A_23_P93302    | NM_001470         | GABBR1         | gamma-aminobutyric acid (GABA) B receptor, 1 | ENST00000377034 |  | 0,539123625 |
| A_23_P10815    | NM_001020658      | PUM1           | pumilio homolog 1 (Drosophila)               | ENST00000257075 |  | 0,539008266 |
| A_23_P108699   | NM_000145         | FSHR           | follicle stimulating hormone receptor        | ENST00000541117 |  | 0,538885785 |
| A_21_P0012991  | ENST00000503268   | XLOC_I2_012074 |                                              | ENST00000503268 |  | 0,53887772  |
| A_21_P0014316  | XR_109252         | LOC100287598   | uncharacterized LOC100287598                 |                 |  | 0,538862148 |
| A_21_P0007273  | THC2732835        | XLOC_009272    |                                              |                 |  | 0,538821523 |
| A_21_P0000181  | NM_001242701      | CAMTA1         | calmodulin binding transcription activator 1 | ENST00000461580 |  | 0,538752764 |



|               |                  |                |                                                                |                 |             |
|---------------|------------------|----------------|----------------------------------------------------------------|-----------------|-------------|
| A_21_P0000242 | NR_002437        | SNORD54        | small nucleolar RNA, C/D box 54                                | ENST00000521289 | 0,538746195 |
| A_33_P3255459 | NR_034136        | LOC100133461   | uncharacterized LOC100133461                                   | ENST00000508619 | 0,53860688  |
| A_23_P87879   | NM_001781        | CD69           | CD69 molecule                                                  | ENST00000228434 | 0,538565368 |
| A_33_P3357445 | NM_003211        | TDG            | thymine-DNA glycosylase                                        | ENST00000392872 | 0,538524563 |
| A_23_P101905  | NM_005883        | APC2           | adenomatosis polyposis coli 2                                  | ENST00000233607 | 0,538494424 |
| A_21_P0013520 | TCONS_I2_0002826 | XLOC_I2_014566 |                                                                |                 | 0,538427578 |
| A_24_P178602  | NM_198457        | ZNF600         | zinc finger protein 600                                        | ENST00000338230 | 0,538398702 |
| A_21_P0002850 | XR_110050        | LOC100506301   | uncharacterized LOC100506301                                   | ENST00000416124 | 0,538190322 |
| A_33_P3275630 | AK125613         | LOC100131820   | uncharacterized LOC100131820                                   |                 | 0,538136922 |
| A_21_P0013759 | THC2487640       | XLOC_I2_015491 |                                                                |                 | 0,538028239 |
| A_23_P92035   | NM_001080517     | SETD5          | SET domain containing 5                                        | ENST00000466826 | 0,537977762 |
| A_23_P117261  | NM_130806        | RXFP2          | relaxin/insulin-like family peptide receptor 2                 | ENST00000298386 | 0,537895976 |
| A_33_P3390024 | BC029432         | EXOC7          | exocyst complex component 7                                    | ENST00000406660 | 0,537882118 |
| A_23_P74162   | NM_018134        | IQCC           | IQ motif containing C                                          | ENST00000537469 | 0,537875578 |
| A_21_P0004937 | TCONS_00011946   | XLOC_005458    |                                                                |                 | 0,537861091 |
| A_21_P0009972 | ENST00000427333  | XLOC_013559    |                                                                | ENST00000427333 | 0,537814675 |
| A_24_P237757  | AL136621         | ZMYM2          | zinc finger, MYM-type 2                                        | ENST00000382881 | 0,537786704 |
| A_33_P3214501 | NM_022767        | AEN            | apoptosis enhancing nuclease                                   | ENST00000379231 | 0,537777193 |
| A_23_P353742  | NM_017749        | AMBRA1         | autophagy/beclin-1 regulator 1                                 | ENST00000458649 | 0,537755984 |
| A_32_P108474  | NM_002940        | ABCE1          | ATP-binding cassette, sub-family E (OABP), member 1            | ENST00000296577 | 0,537726421 |
| A_33_P3314436 | NM_001163315     | FBXL17         | F-box and leucine-rich repeat protein 17                       | ENST00000481160 | 0,537605241 |
| A_23_P34628   | NM_001514        | GTF2B          | general transcription factor IIB                               | ENST00000448623 | 0,537382784 |
| A_33_P3335682 | NM_033256        | PPP1R14A       | protein phosphatase 1, regulatory (inhibitor) subunit 14A      | ENST00000347262 | 0,537356588 |
| A_23_P163353  | NM_016166        | PIAS1          | protein inhibitor of activated STAT, 1                         | ENST00000545237 | 0,537266454 |
| A_33_P3418611 | NM_001242680     | ZNF729         | zinc finger protein 729                                        | ENST00000357491 | 0,537063814 |
| A_21_P0011028 | THC2603794       | XLOC_I2_002502 |                                                                |                 | 0,537019739 |
| A_33_P3311170 | NR_002593        | SLC7A5P1       | solute carrier family 7 (amino acid transporter light chain, L | ENST00000435197 | 0,536996032 |
| A_21_P0000460 | NR_003685        | SNORD121A      | small nucleolar RNA, C/D box 121A                              |                 | 0,536893324 |
| A_23_P10815   | NM_001020658     | PUM1           | pumilio homolog 1 (Drosophila)                                 | ENST00000257075 | 0,536884484 |

|                |                  |                |                                                              |                 |             |
|----------------|------------------|----------------|--------------------------------------------------------------|-----------------|-------------|
| A_23_P70201    | NM_001270        | CHD1           | chromodomain helicase DNA binding protein 1                  | ENST00000284049 | 0,536853759 |
| A_21_P0013800  | TCONS_I2_0003039 | XLOC_I2_015641 |                                                              |                 | 0,536745788 |
| A_21_P0005232  | ENST00000440455  | XLOC_006093    |                                                              | ENST00000440455 | 0,536720283 |
| A_23_P111724   | NM_138290        | RUNDC3B        | RUN domain containing 3B                                     | ENST00000493037 | 0,536672849 |
| A_24_P842172   | NR_027000        | LOC349196      | uncharacterized LOC349196                                    |                 | 0,536605284 |
| A_33_P3327290  | NM_001029955     | DCAF4L1        | DDB1 and CUL4 associated factor 4-like 1                     | ENST00000333141 | 0,536516981 |
| A_23_P79794    | NM_021809        | TGIF2          | TGFB-induced factor homeobox 2                               | ENST00000373874 | 0,536475605 |
| A_33_P3264855  | NM_001145129     | ZNF192P1       | zinc finger protein 192 pseudogene 1                         |                 | 0,536445528 |
| A_33_P3279851  | NR_037931        | LOC100286979   | anaphase-promoting complex subunit 1-like                    |                 | 0,536381347 |
| A_33_P3234347  | NM_001171689     | AMMECR1        | Alport syndrome, mental retardation, midface hypoplasia a    | ENST00000372057 | 0,536325168 |
| A_33_P3397795  | AK095489         | C14orf135      | chromosome 14 open reading frame 135                         | ENST00000406949 | 0,536250806 |
| A_19_P00811196 | NR_038361        | LOC100505854   | uncharacterized LOC100505854                                 |                 | 0,536250597 |
| A_24_P36868    | NM_025160        | WDR26          | WD repeat domain 26                                          | ENST00000295024 | 0,536212399 |
| A_23_P121596   | NM_002704        | PPBP           | pro-platelet basic protein (chemokine (C-X-C motif) ligand 7 | ENST00000296028 | 0,5361741   |
| A_33_P3305446  | NM_001011878     | DEFB121        | defensin, beta 121                                           | ENST00000376314 | 0,536095638 |
| A_23_P252748   | NM_007152        | ZNF195         | zinc finger protein 195                                      | ENST00000526601 | 0,53602509  |
| A_33_P3725324  | NM_004654        | USP9Y          | ubiquitin specific peptidase 9, Y-linked                     | ENST00000338981 | 0,535949098 |
| A_21_P0011563  | TCONS_I2_0001102 | XLOC_I2_005933 |                                                              |                 | 0,535883942 |
| A_21_P0000306  | NR_002950        | SNORA2A        | small nucleolar RNA, H/ACA box 2A                            |                 | 0,535827602 |
| A_21_P0000445  | NR_003321        | SNORD116-6     | small nucleolar RNA, C/D box 116-6                           | ENST00000549804 | 0,535812824 |
| A_23_P114349   | NM_130776        | XAGE3          | X antigen family, member 3                                   | ENST00000346279 | 0,535764568 |
| A_23_P406928   | ENST00000361567  | ND5            | NADH dehydrogenase, subunit 5 (complex I)                    | ENST00000361567 | 0,535763769 |
| A_33_P3276638  | NM_024567        | HMBOX1         | homeobox containing 1                                        | ENST00000355231 | 0,535747796 |
| A_33_P3381328  | NR_027294        | FAM201A        | family with sequence similarity 201, member A                | ENST00000484285 | 0,535501164 |
| A_21_P0000336  | NR_002982        | SNORA54        | small nucleolar RNA, H/ACA box 54                            |                 | 0,535377244 |
| A_21_P0003081  | TCONS_00006354   | XLOC_002975    |                                                              |                 | 0,535326132 |
| A_21_P0012875  | CR745775         | XLOC_I2_011885 |                                                              |                 | 0,535311889 |
| A_19_P00320242 | ENST00000551938  | LOC100506948   |                                                              | ENST00000551938 | 0,535289373 |
| A_21_P0006046  | ENST00000421509  | XLOC_007538    |                                                              | ENST00000421509 | 0,535256197 |

|                |                 |              |                                                            |                 |             |
|----------------|-----------------|--------------|------------------------------------------------------------|-----------------|-------------|
| A_23_P402287   | NM_153371       | LNX2         | ligand of numb-protein X 2                                 | ENST00000316334 | 0,535231754 |
| A_23_P13822    | NM_018423       | STYK1        | serine/threonine/tyrosine kinase 1                         | ENST00000075503 | 0,535058009 |
| A_23_P146004   | NM_024814       | CBLL1        | Cas-Br-M (murine) ecotropic retroviral transforming sequer | ENST00000440859 | 0,534768463 |
| A_21_P0009390  | TCONS_00025420  | XLOC_012229  |                                                            |                 | 0,534704992 |
| A_23_P9869     | NM_032649       | CNDP1        | carnosine dipeptidase 1 (metallopeptidase M20 family)      | ENST00000358821 | 0,534641444 |
| A_33_P3736691  | NM_025189       | ZNF430       | zinc finger protein 430                                    | ENST00000418100 | 0,534597037 |
| A_23_P168610   | NM_014399       | TSPAN13      | tetraspanin 13                                             | ENST00000262067 | 0,534589072 |
| A_33_P3308903  | NM_080875       | MIB2         | mindbomb homolog 2 (Drosophila)                            | ENST00000506488 | 0,534463671 |
| A_23_P87879    | NM_001781       | CD69         | CD69 molecule                                              | ENST00000228434 | 0,534455697 |
| A_23_P111865   | NM_145914       | ZSCAN21      | zinc finger and SCAN domain containing 21                  | ENST00000292450 | 0,53443687  |
| A_24_P115990   | NM_020547       | AMHR2        | anti-Mullerian hormone receptor, type II                   | ENST00000550839 | 0,5342844   |
| A_33_P3371514  | NM_022755       | IPPK         | inositol 1,3,4,5,6-pentakisphosphate 2-kinase              | ENST00000375522 | 0,534279839 |
| A_24_P178396   | NM_001031618    | SPDYE2       | speedy homolog E2 (Xenopus laevis)                         | ENST00000432940 | 0,534258668 |
| A_33_P3405916  | NR_038368       | LINC00273    | long intergenic non-protein coding RNA 273                 | ENST00000539813 | 0,534215472 |
| A_23_P10815    | NM_001020658    | PUM1         | pumilio homolog 1 (Drosophila)                             | ENST00000257075 | 0,53412257  |
| A_33_P3252730  | NR_027049       | ZNF788       | zinc finger family member 788                              | ENST00000339302 | 0,534100599 |
| A_21_P0000326  | NR_002971       | SNORA38      | small nucleolar RNA, H/ACA box 38                          |                 | 0,534086008 |
| A_21_P0003092  | XR_110395       | LOC440993    | uncharacterized LOC440993                                  | ENST00000445707 | 0,534083939 |
| A_23_P162589   | NM_001017535    | VDR          | vitamin D (1,25- dihydroxyvitamin D3) receptor             | ENST00000229022 | 0,534030461 |
| A_21_P0002107  | ENST00000415918 | XLOC_002339  |                                                            | ENST00000415918 | 0,533863351 |
| A_21_P0005376  | ENST00000416708 | XLOC_006080  |                                                            | ENST00000416708 | 0,533754946 |
| A_21_P0009296  | TCONS_00025558  | XLOC_012387  |                                                            |                 | 0,533703668 |
| A_33_P3298942  | ENST00000326831 | ATP10B       | ATPase, class V, type 10B                                  | ENST00000326831 | 0,533671839 |
| A_19_P00315524 | NR_003491       | MIAT         |                                                            |                 | 0,53357182  |
| A_21_P0005557  | TCONS_00014118  | XLOC_006069  |                                                            |                 | 0,533543416 |
| A_33_P3290089  | XR_109536       | LOC100505585 | uncharacterized LOC100505585                               |                 | 0,53353044  |
| A_23_P111724   | NM_138290       | RUNDC3B      | RUN domain containing 3B                                   | ENST00000493037 | 0,533396491 |
| A_21_P0005573  | TCONS_00014191  | XLOC_006200  |                                                            |                 | 0,533327413 |
| A_23_P101281   | NM_032828       | ZNF587       | zinc finger protein 587                                    | ENST00000339656 | 0,533310234 |

|                |                  |                |                                                                 |                 |             |
|----------------|------------------|----------------|-----------------------------------------------------------------|-----------------|-------------|
| A_23_P102117   | NM_025216        | WNT10A         | wingless-type MMTV integration site family, member 10A          | ENST00000258411 | 0,533292288 |
| A_21_P0013193  | NR_026873        | LINC00174      | long intergenic non-protein coding RNA 174                      | ENST00000416572 | 0,533234888 |
| A_32_P181020   | NM_005510        | DOM3Z          | dom-3 homolog Z (C. elegans)                                    | ENST00000474587 | 0,533207146 |
| A_23_P374281   | NM_152623        | CDC20B         | cell division cycle 20 homolog B (S. cerevisiae)                | ENST00000296733 | 0,533132147 |
| A_21_P0011299  | THC2554687       | XLOC_I2_004595 |                                                                 |                 | 0,533089959 |
| A_24_P340853   | NM_032789        | PARP10         | poly (ADP-ribose) polymerase family, member 10                  | ENST00000527262 | 0,533000197 |
| A_24_P159837   | AB209226         | ZNF302         | zinc finger protein 302                                         | ENST00000502743 | 0,532907227 |
| A_33_P3422429  | ENST00000459752  | INADL          | InaD-like (Drosophila)                                          | ENST00000459752 | 0,532865308 |
| A_21_P0007151  | ENST00000441638  | XLOC_009339    |                                                                 | ENST00000441638 | 0,532726536 |
| A_33_P3421794  | NM_014681        | DHX34          | DEAH (Asp-Glu-Ala-His) box polypeptide 34                       | ENST00000460681 | 0,532643246 |
| A_21_P0012471  | TCONS_I2_0001963 | XLOC_I2_010451 |                                                                 |                 | 0,532631755 |
| A_23_P87491    | NM_001638        | APOF           | apolipoprotein F                                                | ENST00000541105 | 0,532624027 |
| A_23_P37654    | NM_001164273     | MGA            | MAX gene associated                                             | ENST00000389936 | 0,532563762 |
| A_33_P3284552  | AK023303         | COPE           | coatomer protein complex, subunit epsilon                       |                 | 0,532536051 |
| A_19_P00320226 | NR_027456        | LOC100272228   | uncharacterized LOC100272228                                    |                 | 0,532462208 |
| A_23_P164341   | NM_014232        | VAMP2          | vesicle-associated membrane protein 2 (synaptobrevin 2)         | ENST00000316509 | 0,53228959  |
| A_19_P00321953 | NR_034099        | LOC388948      | uncharacterized LOC388948                                       | ENST00000479311 | 0,53216052  |
| A_33_P3330716  | NM_017759        | INO80D         | INO80 complex subunit D                                         | ENST00000403263 | 0,531983546 |
| A_24_P419028   | AB014771         | MOP-1          | MOP-1                                                           |                 | 0,531807603 |
| A_24_P338187   | NM_012207        | HNRNPH3        | heterogeneous nuclear ribonucleoprotein H3 (2H9)                | ENST00000441000 | 0,531682809 |
| A_24_P804667   | NM_001043229     | METTL12        | methyltransferase like 12                                       | ENST00000398922 | 0,531654347 |
| A_21_P0000488  | NR_004379        | SNORD96B       | small nucleolar RNA, C/D box 96B                                |                 | 0,531631505 |
| A_33_P3311717  | ENST00000551557  | TGIF1          | TGFB-induced factor homeobox 1                                  | ENST00000551557 | 0,531530285 |
| A_21_P0000463  | NR_003688        | SNORD105B      | small nucleolar RNA, C/D box 105B                               |                 | 0,531433923 |
| A_19_P00812924 | ENST00000530955  | LOC100507165   |                                                                 | ENST00000530955 | 0,531201174 |
| A_21_P0007352  | TCONS_00019635   | XLOC_009437    |                                                                 |                 | 0,53109981  |
| A_33_P3315060  | ENST00000495527  | ZC3H11A        | zinc finger CCCH-type containing 11A                            | ENST00000495527 | 0,530791907 |
| A_23_P102391   | NM_014585        | SLC40A1        | solute carrier family 40 (iron-regulated transporter), member 1 | ENST00000544056 | 0,530692258 |
| A_23_P402733   | NM_032195        | SON            | SON DNA binding protein                                         | ENST00000300278 | 0,530680161 |

|                |                 |                |                                                             |                 |             |
|----------------|-----------------|----------------|-------------------------------------------------------------|-----------------|-------------|
| A_33_P3546363  | BQ950045        | LOC400128      | uncharacterized LOC400128                                   |                 | 0,530509874 |
| A_33_P3311770  | NM_213603       | ZNF789         | zinc finger protein 789                                     | ENST00000331410 | 0,530443746 |
| A_33_P3274935  | NM_030630       | C17orf28       | chromosome 17 open reading frame 28                         | ENST00000318565 | 0,530419096 |
| A_23_P78209    | NM_002359       | MAFG           | v-maf musculoaponeurotic fibrosarcoma oncogene homolo       | ENST00000357736 | 0,530396488 |
| A_23_P116168   | NM_032424       | KIAA1826       | KIAA1826                                                    | ENST00000301919 | 0,530155931 |
| A_23_P323943   | NM_178498       | SLC5A12        | solute carrier family 5 (sodium/glucose cotransporter), mer | ENST00000280467 | 0,530089398 |
| A_21_P0007522  | TCONS_00020316  | XLOC_009649    |                                                             |                 | 0,530051837 |
| A_33_P3377194  | NM_033304       | ADRA1A         | adrenergic, alpha-1A-, receptor                             | ENST00000358857 | 0,529980244 |
| A_23_P87879    | NM_001781       | CD69           | CD69 molecule                                               | ENST00000228434 | 0,529918934 |
| A_21_P0001619  | THC2630478      | XLOC_001195    |                                                             |                 | 0,529847334 |
| A_21_P0007039  | TCONS_00018649  | XLOC_009000    |                                                             |                 | 0,529830688 |
| A_23_P44760    | NM_014159       | SETD2          | SET domain containing 2                                     | ENST00000409792 | 0,529794524 |
| A_23_P397455   | NM_145259       | ACVR1C         | activin A receptor, type IC                                 | ENST00000243349 | 0,529760438 |
| A_33_P3325306  | ENST00000463841 | HSPE1          | heat shock 10kDa protein 1 (chaperonin 10)                  | ENST00000463841 | 0,529634326 |
| A_33_P3387566  | NR_026770       | C17orf88       | chromosome 17 open reading frame 88                         | ENST00000458392 | 0,529630143 |
| A_33_P3291569  | NM_016424       | LUC7L3         | LUC7-like 3 (S. cerevisiae)                                 | ENST00000240304 | 0,529611704 |
| A_21_P0011292  | NR_036470       | HERC2P7        | hect domain and RLD 2 pseudogene 7                          |                 | 0,529599047 |
| A_19_P00318728 | NR_034007       | LOC339894      | uncharacterized LOC339894                                   | ENST00000471357 | 0,529541602 |
| A_21_P0000563  | NR_028374       | SNORA80B       | small nucleolar RNA, H/ACA box 80B                          |                 | 0,529342469 |
| A_21_P0010508  | ENST00000424215 | XLOC_I2_000033 |                                                             | ENST00000424215 | 0,529173807 |
| A_33_P3219720  | ENST00000485560 | ZNF248         | zinc finger protein 248                                     | ENST00000485560 | 0,529041432 |
| A_21_P0005577  | TCONS_00014217  | XLOC_006258    |                                                             |                 | 0,529022511 |
| A_21_P0014782  | XR_132564       | LOC100652913   | uncharacterized LOC100652913                                |                 | 0,528996509 |
| A_21_P0002596  | TCONS_00004804  | XLOC_001496    |                                                             |                 | 0,528902388 |
| A_23_P416142   | NM_004087       | DLG1           | discs, large homolog 1 (Drosophila)                         | ENST00000392382 | 0,528618208 |
| A_33_P3403179  | BC048193        | GUSBP1         | glucuronidase, beta pseudogene 1                            |                 | 0,528316981 |
| A_23_P142671   | NM_144631       | ZNF513         | zinc finger protein 513                                     | ENST00000491924 | 0,528255798 |
| A_33_P3228564  | NM_001144875    | DOK3           | docking protein 3                                           | ENST00000312943 | 0,528235633 |
| A_23_P146539   | NM_002170       | IFNA8          | interferon, alpha 8                                         | ENST00000380205 | 0,528220738 |



|                |                 |                |                                                           |                 |             |
|----------------|-----------------|----------------|-----------------------------------------------------------|-----------------|-------------|
| A_33_P3385983  | NM_021143       | ZNF20          | zinc finger protein 20                                    | ENST00000292241 | 0,528182944 |
| A_33_P3299066  | NM_006186       | NR4A2          | nuclear receptor subfamily 4, group A, member 2           | ENST00000539077 | 0,528169639 |
| A_24_P136402   | NM_005933       | MLL            | myeloid/lymphoid or mixed-lineage leukemia (trithorax hor | ENST00000389506 | 0,528161396 |
| A_21_P0011413  | NM_005332       | HBZ            | hemoglobin, zeta                                          | ENST00000252951 | 0,528142589 |
| A_21_P0000218  | NR_000018       | SNORD35A       | small nucleolar RNA, C/D box 35A                          | ENST00000476268 | 0,528116377 |
| A_23_P213166   | NM_018392       | C4orf21        | chromosome 4 open reading frame 21                        | ENST00000506675 | 0,527872962 |
| A_19_P00803333 | NM_020928       | ZSWIM6         |                                                           | ENST00000252744 | 0,527821269 |
| A_33_P3262020  | NM_000606       | C8G            | complement component 8, gamma polypeptide                 | ENST00000224181 | 0,527752259 |
| A_33_P3490794  | NR_027132       | LOC145820      | uncharacterized LOC145820                                 | ENST00000556053 | 0,527691483 |
| A_21_P0000373  | NR_003044       | SNORD50B       | small nucleolar RNA, C/D box 50B                          |                 | 0,527604468 |
| A_21_P0000108  | NM_001190702    | MTRNR2L8       | MT-RNR2-like 8                                            | ENST00000536684 | 0,527555425 |
| A_23_P52121    | NM_002614       | PDZK1          | PDZ domain containing 1                                   | ENST00000451928 | 0,527538501 |
| A_33_P3300800  | NR_024042       | GUCY2E         | guanylate cyclase 2E                                      | ENST00000526984 | 0,527508226 |
| A_21_P0009117  | XR_109344       | LOC100506268   | uncharacterized LOC100506268                              |                 | 0,527418457 |
| A_33_P3371663  | NM_002344       | LTK            | leukocyte receptor tyrosine kinase                        | ENST00000263800 | 0,527252503 |
| A_23_P111811   | NM_019071       | ING3           | inhibitor of growth family, member 3                      | ENST00000427726 | 0,527206515 |
| A_33_P3276585  | NM_001099224    | IFT74          | intraflagellar transport 74 homolog (Chlamydomonas)       | ENST00000429045 | 0,527095802 |
| A_21_P0009829  | XR_109648       | LOC100505515   | uncharacterized LOC100505515                              | ENST00000432244 | 0,52687237  |
| A_33_P3416350  | NM_147152       | ITSN2          | intersectin 2                                             | ENST00000407704 | 0,526798019 |
| A_21_P0000266  | NR_002581       | SNORA72        | small nucleolar RNA, H/ACA box 72                         |                 | 0,526778796 |
| A_19_P00803342 | NM_178549       | ZNF678         |                                                           |                 | 0,526774586 |
| A_21_P0003154  | NR_028303       | LOC100302640   | uncharacterized LOC100302640                              |                 | 0,526750642 |
| A_21_P0011354  | THC2500351      | XLOC_l2_004844 |                                                           |                 | 0,52673689  |
| A_23_P41380    | NM_002940       | ABCE1          | ATP-binding cassette, sub-family E (OABP), member 1       | ENST00000296577 | 0,526328394 |
| A_33_P3396459  | ENST00000412877 | POLR2H         | polymerase (RNA) II (DNA directed) polypeptide H          | ENST00000412877 | 0,526286706 |
| A_23_P101281   | NM_032828       | ZNF587         | zinc finger protein 587                                   | ENST00000339656 | 0,526259715 |
| A_33_P3355717  | ENST00000408913 | ZFP36L1        | zinc finger protein 36, C3H type-like 1                   | ENST00000408913 | 0,526247874 |
| A_23_P250164   | NM_000187       | HGD            | homogentisate 1,2-dioxygenase                             | ENST00000283871 | 0,526198143 |
| A_33_P3284854  | AK127969        | FLJ25694       | uncharacterized protein FLJ25694                          |                 | 0,526106774 |

|                |                 |              |                                                                 |                 |             |
|----------------|-----------------|--------------|-----------------------------------------------------------------|-----------------|-------------|
| A_33_P3269976  | ENST00000538401 | GAL          | galanin prepropeptide                                           | ENST00000538401 | 0,526067617 |
| A_21_P0000824  | NR_038880       | GCFC1-AS1    | GCFC1 antisense RNA 1 (non-protein coding)                      |                 | 0,526049847 |
| A_23_P365418   | NM_001195220    | ZNF783       | zinc finger family member 783                                   | ENST00000434415 | 0,526037421 |
| A_21_P0003269  | XR_108523       | LOC100505710 | uncharacterized LOC100505710                                    |                 | 0,526029948 |
| A_33_P3351735  | NM_018219       | CCDC87       | coiled-coil domain containing 87                                | ENST00000333861 | 0,525977864 |
| A_21_P0002364  | TCONS_00004041  | XLOC_001880  |                                                                 |                 | 0,525783543 |
| A_33_P3362636  | NM_001136498    | CISD3        | CDGSH iron sulfur domain 3                                      | ENST00000439660 | 0,525771804 |
| A_24_P99838    | NM_013361       | ZNF223       | zinc finger protein 223                                         | ENST00000434772 | 0,525701506 |
| A_33_P3258602  | NM_001005566    | OR5B2        | olfactory receptor, family 5, subfamily B, member 2             | ENST00000302581 | 0,525561665 |
| A_33_P3288569  | NM_001144891    | MBIP         | MAP3K12 binding inhibitory protein 1                            | ENST00000554855 | 0,525542813 |
| A_33_P3283897  | AK095511        | LOC100130761 | uncharacterized LOC100130761                                    |                 | 0,525529645 |
| A_33_P3323742  | NM_017761       | PNRC2        | proline-rich nuclear receptor coactivator 2                     | ENST00000374468 | 0,525529176 |
| A_33_P3241428  | NM_015311       | OBSL1        | obscurin-like 1                                                 | ENST00000404537 | 0,525334249 |
| A_33_P3514859  | XR_108862       | LOC100506342 | uncharacterized LOC100506342                                    |                 | 0,525306739 |
| A_23_P111811   | NM_019071       | ING3         | inhibitor of growth family, member 3                            | ENST00000427726 | 0,525095948 |
| A_23_P139965   | NM_001010897    | SERP2        | stress-associated endoplasmic reticulum protein family member 2 | ENST00000493476 | 0,525087886 |
| A_21_P0000022  | NM_001159491    | BRI3         | brain protein I3                                                | ENST00000539286 | 0,52504102  |
| A_21_P0005756  | TCONS_00014840  | XLOC_006908  |                                                                 |                 | 0,524995803 |
| A_21_P0000489  | NR_004380       | SNORD104     | small nucleolar RNA, C/D box 104                                |                 | 0,524861239 |
| A_33_P3256920  | NM_058238       | WNT7B        | wingless-type MMTV integration site family, member 7B           | ENST00000339464 | 0,524833166 |
| A_32_P12610    | NM_198256       | E2F6         | E2F transcription factor 6                                      | ENST00000362009 | 0,524817824 |
| A_33_P3289236  | NM_020995       | HPR          | haptoglobin-related protein                                     | ENST00000356967 | 0,524728579 |
| A_19_P00320184 | NR_038988       | LOC100287765 |                                                                 |                 | 0,524643552 |
| A_23_P428640   | NR_026862       | PPP1R3E      | protein phosphatase 1, regulatory subunit 3E                    | ENST00000452015 | 0,524561927 |
| A_24_P101786   | NM_001083953    | THADA        | thyroid adenoma associated                                      | ENST00000474159 | 0,524538498 |
| A_33_P3406998  | NM_130438       | DYRK1A       | dual-specificity tyrosine-(Y)-phosphorylation regulated kinase  | ENST00000462274 | 0,524435421 |
| A_21_P0010939  | NM_139173       | SLC9B1       | solute carrier family 9, subfamily B (cation proton antiporter) | ENST00000296422 | 0,524412954 |
| A_23_P156807   | NM_001202519    | CFLAR        | CASP8 and FADD-like apoptosis regulator                         | ENST00000412930 | 0,524361721 |
| A_33_P3239287  | NM_001005271    | CHD3         | chromodomain helicase DNA binding protein 3                     | ENST00000330494 | 0,524356726 |

|                |                 |              |                                                          |                 |             |
|----------------|-----------------|--------------|----------------------------------------------------------|-----------------|-------------|
| A_33_P3281358  | ENST00000472621 | ARF3         | ADP-ribosylation factor 3                                | ENST00000472621 | 0,524156972 |
| A_23_P5301     | NM_014553       | TFCP2L1      | transcription factor CP2-like 1                          | ENST00000263707 | 0,524151255 |
| A_21_P0001367  | TCONS_00001117  | XLOC_000367  |                                                          |                 | 0,523662785 |
| A_33_P3711933  | NM_152432       | ARHGAP42     | Rho GTPase activating protein 42                         | ENST00000529535 | 0,523631656 |
| A_23_P36345    | NM_006645       | STARD10      | StAR-related lipid transfer (START) domain containing 10 | ENST00000537947 | 0,523613089 |
| A_21_P0000830  | NR_038903       | LOC100506233 | uncharacterized LOC100506233                             |                 | 0,523516397 |
| A_32_P230196   | NM_001077685    | AGAP7        | ArfGAP with GTPase domain, ankyrin repeat and PH domain  | ENST00000413193 | 0,523503193 |
| A_23_P136325   | NM_133264       | WIPF2        | WAS/WASL interacting protein family, member 2            | ENST00000494757 | 0,523477688 |
| A_23_P9018     | NM_001040702    | DEFB104B     | defensin, beta 104B                                      | ENST00000314265 | 0,523393496 |
| A_23_P116168   | NM_032424       | KIAA1826     | KIAA1826                                                 | ENST00000301919 | 0,523370627 |
| A_21_P0003848  | ENST00000506057 | XLOC_003650  |                                                          | ENST00000506057 | 0,523353436 |
| A_33_P3254431  | AK054818        | C1orf86      | chromosome 1 open reading frame 86                       |                 | 0,523345171 |
| A_33_P3303104  | NM_001185119    | MYNN         | myoneurin                                                | ENST00000392733 | 0,523243374 |
| A_23_P111811   | NM_019071       | ING3         | inhibitor of growth family, member 3                     | ENST00000427726 | 0,523225554 |
| A_23_P105545   | NM_016830       | VAMP1        | vesicle-associated membrane protein 1 (synaptobrevin 1)  | ENST00000535927 | 0,523178262 |
| A_21_P0005934  | BX648950        | XLOC_006753  |                                                          |                 | 0,523169929 |
| A_21_P0009377  | TCONS_00025825  | XLOC_012097  |                                                          |                 | 0,523144101 |
| A_33_P3772150  | NM_018702       | ADARB2       | adenosine deaminase, RNA-specific, B2                    |                 | 0,523142668 |
| A_24_P68311    | NM_015180       | SYNE2        | spectrin repeat containing, nuclear envelope 2           | ENST00000356081 | 0,523138975 |
| A_23_P113471   | NM_174912       | FAAH2        | fatty acid amide hydrolase 2                             | ENST00000491179 | 0,523087232 |
| A_32_P15958    | NR_027273       | ZNF295-AS1   | ZNF295 antisense RNA 1 (non-protein coding)              | ENST00000412906 | 0,522983004 |
| A_24_P381224   | NM_172230       | SYVN1        | synovial apoptosis inhibitor 1, synoviolin               | ENST00000526060 | 0,522981193 |
| A_33_P3416767  | NM_032711       | MAFG         | v-maf musculoaponeurotic fibrosarcoma oncogene homolog   | ENST00000357736 | 0,522925285 |
| A_21_P0001773  | NR_024452       | LOC100134259 | uncharacterized LOC100134259                             | ENST00000468141 | 0,522755541 |
| A_19_P00808086 | NM_018328       | MBD5         |                                                          | ENST00000478804 | 0,522713229 |
| A_21_P0012240  | NR_001591       | psiTPTE22    | TPTE pseudogene                                          | ENST00000443658 | 0,52268774  |
| A_24_P116669   | NM_138793       | CANT1        | calcium activated nucleotidase 1                         | ENST00000537282 | 0,522674251 |
| A_23_P129413   | NM_022357       | DPEP3        | dipeptidase 3                                            | ENST00000268793 | 0,522603832 |
| A_23_P117261   | NM_130806       | RXFP2        | relaxin/insulin-like family peptide receptor 2           | ENST00000298386 | 0,522231707 |

|               |                  |                |                                                            |                 |             |
|---------------|------------------|----------------|------------------------------------------------------------|-----------------|-------------|
| A_21_P0005139 | TCONS_00012614   | XLOC_005492    |                                                            |                 | 0,522136921 |
| A_23_P217054  | NM_024345        | DCAF10         | DDB1 and CUL4 associated factor 10                         | ENST00000478453 | 0,522023219 |
| A_21_P0014949 | NM_006310        | NPEPPS         | aminopeptidase puromycin sensitive                         | ENST00000525037 | 0,52180949  |
| A_24_P400355  | NM_015949        | GET4           | golgi to ER traffic protein 4 homolog (S. cerevisiae)      | ENST00000265857 | 0,5218006   |
| A_23_P124988  | NM_012285        | KCNH4          | potassium voltage-gated channel, subfamily H (eag-related) | ENST00000264661 | 0,521774455 |
| A_33_P3321507 | NM_001080495     | TNRC18         | trinucleotide repeat containing 18                         | ENST00000430969 | 0,521754707 |
| A_24_P382319  | NM_001712        | CEACAM1        | carcinoembryonic antigen-related cell adhesion molecule 1  | ENST00000352591 | 0,521710297 |
| A_23_P45699   | NM_003902        | FUBP1          | far upstream element (FUSE) binding protein 1              | ENST00000394922 | 0,521705461 |
| A_23_P364107  | NM_018353        | MIS18BP1       | MIS18 binding protein 1                                    | ENST00000470424 | 0,521691121 |
| A_23_P122615  | NM_032870        | PNISR          | PNN-interacting serine/arginine-rich protein               | ENST00000438806 | 0,521614372 |
| A_23_P54100   | NM_001437        | ESR2           | estrogen receptor 2 (ER beta)                              | ENST00000357782 | 0,521608287 |
| A_32_P150030  | NM_003620        | PPM1D          | protein phosphatase, Mg2+/Mn2+ dependent, 1D               | ENST00000392995 | 0,521486315 |
| A_33_P3256914 | ENST00000442458  | ITFG3          | integrin alpha FG-GAP repeat containing 3                  | ENST00000442458 | 0,52145438  |
| A_24_P332862  | NM_001076678     | ZNF493         | zinc finger protein 493                                    | ENST00000418100 | 0,521412466 |
| A_24_P15292   | NM_032018        | C1orf124       | chromosome 1 open reading frame 124                        | ENST00000469904 | 0,5213657   |
| A_23_P60962   | NM_139021        | MAPK15         | mitogen-activated protein kinase 15                        | ENST00000533830 | 0,521289726 |
| A_21_P0011185 | TCONS_I2_0000720 | XLOC_I2_003992 |                                                            |                 | 0,521245461 |
| A_21_P0002598 | TCONS_00004809   | XLOC_001515    |                                                            |                 | 0,521067458 |
| A_23_P10815   | NM_001020658     | PUM1           | pumilio homolog 1 (Drosophila)                             | ENST00000257075 | 0,520889453 |
| A_21_P0013340 | ENST00000478672  | XLOC_I2_013931 |                                                            | ENST00000478672 | 0,520821951 |
| A_33_P3401428 | NM_018112        | TMEM38B        | transmembrane protein 38B                                  | ENST00000451560 | 0,520750541 |
| A_33_P3224483 | BC020495         | RABL2B         | RAB, member of RAS oncogene family-like 2B                 | ENST00000395590 | 0,520441538 |
| A_33_P3294961 | ENST00000398475  | LAT2           | linker for activation of T cells family, member 2          | ENST00000398475 | 0,52041985  |
| A_23_P56298   | NM_025189        | ZNF430         | zinc finger protein 430                                    | ENST00000261560 | 0,520380515 |
| A_21_P0002192 | TCONS_00003621   | XLOC_001412    |                                                            |                 | 0,520293137 |
| A_23_P2922    | NM_016586        | MBIP           | MAP3K12 binding inhibitory protein 1                       | ENST00000318473 | 0,5202692   |
| A_23_P126486  | NR_026752        | CROCCP2        | ciliary rootlet coiled-coil, rootletin pseudogene 2        |                 | 0,520238363 |
| A_23_P109636  | NM_015541        | LRIG1          | leucine-rich repeats and immunoglobulin-like domains 1     | ENST00000383702 | 0,520130665 |
| A_23_P7582    | NM_003202        | TCF7           | transcription factor 7 (T-cell specific, HMG-box)          | ENST00000522653 | 0,520083254 |

|                |                 |              |                                                               |                 |             |
|----------------|-----------------|--------------|---------------------------------------------------------------|-----------------|-------------|
| A_33_P3209915  | NM_001099666    | PTAR1        | protein prenyltransferase alpha subunit repeat containing 1   | ENST00000340434 | 0,520050153 |
| A_19_P00322299 | NM_020928       | ZSWIM6       |                                                               | ENST00000252744 | 0,520024514 |
| A_21_P0003655  | TCONS_00008261  | XLOC_003704  |                                                               |                 | 0,519957423 |
| A_33_P3316978  | NM_207396       | RNF207       | ring finger protein 207                                       | ENST00000377948 | 0,519939495 |
| A_24_P86389    | NM_003514       | HIST1H2AM    | histone cluster 1, H2am                                       | ENST00000359611 | 0,519860412 |
| A_23_P113462   | NM_017641       | KIF21A       | kinesin family member 21A                                     | ENST00000395670 | 0,519854735 |
| A_21_P0001911  | NR_037858       | LOC254128    | uncharacterized LOC254128                                     |                 | 0,519801445 |
| A_21_P0001432  | TCONS_00001315  | XLOC_000595  |                                                               |                 | 0,519741146 |
| A_21_P0000880  | NR_040012       | SPAG5-AS1    | SPAG5 antisense RNA 1 (non-protein coding)                    | ENST00000414744 | 0,519734463 |
| A_21_P0014466  | XR_109952       | LOC100507307 | uncharacterized LOC100507307                                  |                 | 0,519712378 |
| A_19_P00320295 | NR_023915       | IPW          | imprinted in Prader-Willi syndrome (non-protein coding)       | ENST00000553149 | 0,519673947 |
| A_21_P0014386  | XR_109556       | LOC100507004 | uncharacterized LOC100507004                                  |                 | 0,519655345 |
| A_23_P98686    | NM_025092       | ATHL1        | ATH1, acid trehalase-like 1 (yeast)                           | ENST00000474221 | 0,519552025 |
| A_23_P6943     | NM_005290       | GPR15        | G protein-coupled receptor 15                                 | ENST00000284311 | 0,519525688 |
| A_33_P3287113  | ENST00000296312 | KIAA1530     | KIAA1530                                                      | ENST00000296312 | 0,519428184 |
| A_21_P0002876  | ENST00000503572 | XLOC_003245  |                                                               | ENST00000503572 | 0,519233879 |
| A_21_P0001196  | ENST00000421851 | XLOC_001095  |                                                               | ENST00000421851 | 0,519221424 |
| A_33_P3227264  | NM_024011       | CDK11A       | cyclin-dependent kinase 11A                                   | ENST00000463652 | 0,519182936 |
| A_23_P201996   | NM_016628       | WAC          | WW domain containing adaptor with coiled-coil                 | ENST00000338396 | 0,519148222 |
| A_21_P0000213  | NR_000013       | SNORD42B     | small nucleolar RNA, C/D box 42B                              |                 | 0,519083945 |
| A_32_P163147   | NM_182607       | VSIG1        | V-set and immunoglobulin domain containing 1                  | ENST00000217957 | 0,519056447 |
| A_23_P1102     | NM_001100       | ACTA1        | actin, alpha 1, skeletal muscle                               | ENST00000366682 | 0,518946983 |
| A_33_P3235400  | NM_004494       | HDGF         | hepatoma-derived growth factor                                | ENST00000406805 | 0,518827891 |
| A_33_P3358621  | XR_109916       | LOC100506036 | uncharacterized LOC100506036                                  |                 | 0,518804153 |
| A_33_P3261197  | NM_002486       | NCBP1        | nuclear cap binding protein subunit 1, 80kDa                  | ENST00000478100 | 0,518769192 |
| A_33_P3265956  | ENST00000397798 | CBFA2T2      | core-binding factor, runt domain, alpha subunit 2; translocat | ENST00000397798 | 0,518758289 |
| A_24_P256654   | NR_015378       | LOC401588    | uncharacterized LOC401588                                     |                 | 0,518740615 |
| A_33_P3236316  | NR_037596       | FLJ14186     | uncharacterized LOC401149                                     |                 | 0,518659844 |
| A_33_P3389478  | ENST00000380799 | SNAPC3       | small nuclear RNA activating complex, polypeptide 3, 50kDa    | ENST00000380799 | 0,518645365 |



|                |                 |                |                                                                      |                 |             |
|----------------|-----------------|----------------|----------------------------------------------------------------------|-----------------|-------------|
| A_24_P383850   | NM_003760       | EIF4G3         | eukaryotic translation initiation factor 4 gamma, 3                  | ENST00000374927 | 0,518572941 |
| A_23_P252748   | NM_007152       | ZNF195         | zinc finger protein 195                                              | ENST00000526601 | 0,51851494  |
| A_23_P76823    | NM_199165       | ADSSL1         | adenylosuccinate synthase like 1                                     | ENST00000557582 | 0,518235625 |
| A_23_P108699   | NM_000145       | FSHR           | follicle stimulating hormone receptor                                | ENST00000541117 | 0,51822799  |
| A_23_P63219    | NM_015100       | POGZ           | pogo transposable element with ZNF domain                            | ENST00000368863 | 0,518227478 |
| A_21_P0013006  | ENST00000514282 | XLOC_I2_012238 |                                                                      | ENST00000514282 | 0,518187118 |
| A_19_P00322977 | NR_015431       | FLJ43663       | uncharacterized LOC378805                                            |                 | 0,518185483 |
| A_24_P374382   | NR_001283       | TOP1P2         | topoisomerase (DNA) I pseudogene 2                                   |                 | 0,518157965 |
| A_21_P0000784  | NR_038396       | LOC100506469   | uncharacterized LOC100506469                                         |                 | 0,518157964 |
| A_24_P67929    | NM_017822       | KANSL2         | KAT8 regulatory NSL complex subunit 2                                | ENST00000357861 | 0,518113069 |
| A_23_P108673   | NM_032181       | FAM176A        | family with sequence similarity 176, member A                        | ENST00000410113 | 0,518006109 |
| A_32_P4403     | NM_014117       | C16orf72       | chromosome 16 open reading frame 72                                  | ENST00000327827 | 0,517969125 |
| A_23_P86411    | NM_017433       | MYO3A          | myosin IIIA                                                          | ENST00000265944 | 0,517963102 |
| A_33_P3397486  | NM_004901       | ENTPD4         | ectonucleoside triphosphate diphosphohydrolase 4                     | ENST00000522255 | 0,517881857 |
| A_23_P111811   | NM_019071       | ING3           | inhibitor of growth family, member 3                                 | ENST00000427726 | 0,517854898 |
| A_23_P109913   | NM_006564       | CXCR6          | chemokine (C-X-C motif) receptor 6                                   | ENST00000438735 | 0,51785454  |
| A_33_P3239112  | ENST00000375290 | PTCH1          | patched 1                                                            | ENST00000375290 | 0,517837842 |
| A_33_P3350643  | NM_001174146    | LMX1B          | LIM homeobox transcription factor 1, beta                            | ENST00000355497 | 0,517824149 |
| A_21_P0003938  | AK128486        | XLOC_004860    |                                                                      |                 | 0,517791992 |
| A_19_P00322349 | ENST00000511431 | Q20ZE8         |                                                                      | ENST00000511431 | 0,517764701 |
| A_24_P173124   | NM_144997       | FLCN           | folliculin                                                           | ENST00000285071 | 0,517724665 |
| A_23_P53891    | NM_001730       | KLF5           | Kruppel-like factor 5 (intestinal)                                   | ENST00000377687 | 0,51771463  |
| A_23_P10815    | NM_001020658    | PUM1           | pumilio homolog 1 (Drosophila)                                       | ENST00000257075 | 0,517624498 |
| A_21_P0009642  | AK002023        | XLOC_012905    |                                                                      |                 | 0,517574594 |
| A_19_P00802390 | TCONS_00015178  | XLOC_007231    |                                                                      |                 | 0,517521005 |
| A_33_P3415596  | XM_003118689    | LOC400499      | uncharacterized LOC400499                                            |                 | 0,517491345 |
| A_23_P20101    | NM_016944       | TAS2R4         | taste receptor, type 2, member 4                                     | ENST00000247881 | 0,517409079 |
| A_23_P430728   | NM_000704       | ATP4A          | ATPase, H <sup>+</sup> /K <sup>+</sup> exchanging, alpha polypeptide | ENST00000262623 | 0,517317628 |
| A_23_P257365   | NM_005263       | GFI1           | growth factor independent 1 transcription repressor                  | ENST00000294702 | 0,517126978 |

|               |                 |                |                                                      |                 |             |
|---------------|-----------------|----------------|------------------------------------------------------|-----------------|-------------|
| A_21_P0011656 | ENST00000534258 | XLOC_I2_006404 |                                                      | ENST00000534258 | 0,517080166 |
| A_24_P256155  | NM_001146340    | NKX1-2         | NK1 homeobox 2                                       | ENST00000440536 | 0,516950384 |
| A_23_P101476  | NM_030824       | ZNF442         | zinc finger protein 442                              | ENST00000242804 | 0,516849466 |
| A_24_P363100  | NM_001012761    | RGMB           | RGM domain family, member B                          | ENST00000508978 | 0,516846124 |
| A_33_P3358158 | NR_033733       | CRYBB2P1       | crystallin, beta B2 pseudogene 1                     | ENST00000382734 | 0,516652434 |
| A_33_P3410232 | NR_024541       | LY6G6E         | lymphocyte antigen 6 complex, locus G6E (pseudogene) | ENST00000461287 | 0,516570072 |
| A_23_P204550  | NM_017988       | SCYL2          | SCY1-like 2 (S. cerevisiae)                          | ENST00000360820 | 0,516514372 |
| A_21_P0011346 | BG107090        | XLOC_I2_004840 |                                                      |                 | 0,516431663 |
| A_33_P3269869 | AK093990        | LOC284009      | uncharacterized LOC284009                            |                 | 0,516421312 |
| A_33_P3323862 | XM_370934       | LOC388210      | apolipoporphorins-like                               |                 | 0,51632256  |
| A_33_P3613000 | NM_001105539    | ZBTB10         | zinc finger and BTB domain containing 10             | ENST00000379091 | 0,516189358 |
| A_32_P496893  | NM_001014830    | C14orf183      | chromosome 14 open reading frame 183                 | ENST00000305273 | 0,51589299  |
| A_21_P0005109 | TCONS_00012428  | XLOC_005180    |                                                      |                 | 0,515872943 |
| A_23_P104054  | NM_016227       | C1orf9         | chromosome 1 open reading frame 9                    | ENST00000367723 | 0,515688645 |
| A_23_P46131   | NM_024869       | GRRP1          | glycine/arginine rich protein 1                      | ENST00000374268 | 0,515606619 |
| A_23_P111865  | NM_145914       | ZSCAN21        | zinc finger and SCAN domain containing 21            | ENST00000292450 | 0,515559023 |
| A_32_P159400  | NM_015902       | UBR5           | ubiquitin protein ligase E3 component n-recognin 5   | ENST00000517465 | 0,515541755 |
| A_23_P205768  | NM_006628       | ARPP19         | cAMP-regulated phosphoprotein, 19kDa                 | ENST00000249822 | 0,5154882   |
| A_21_P0005354 | TCONS_00013328  | XLOC_005976    |                                                      |                 | 0,515467042 |
| A_32_P177040  | NM_001099435    | SPDYE5         | speedy homolog E5 (Xenopus laevis)                   | ENST00000426970 | 0,515438806 |
| A_21_P0013164 | NR_028093       | LPAL2          | lipoprotein, Lp(a)-like 2, pseudogene                | ENST00000435757 | 0,515406932 |
| A_21_P0013927 | ENST00000484786 | TRAK1          | trafficking protein, kinesin binding 1               | ENST00000484786 | 0,515390778 |
| A_23_P402751  | ENST00000361739 | COX2           | cytochrome c oxidase subunit II                      | ENST00000361739 | 0,515297772 |
| A_21_P0012971 | ENST00000507290 | XLOC_I2_011911 |                                                      | ENST00000507290 | 0,515257523 |
| A_23_P33465   | NM_024324       | CRELD2         | cysteine-rich with EGF-like domains 2                | ENST00000487969 | 0,515254479 |
| A_23_P37359   | NM_014430       | CIDEB          | cell death-inducing DFFA-like effector b             | ENST00000541830 | 0,515215481 |
| A_33_P3373185 | NR_024497       | LOC399744      | uncharacterized LOC399744                            | ENST00000438516 | 0,515192898 |
| A_24_P831309  | NM_207401       | C1orf229       | chromosome 1 open reading frame 229                  | ENST00000408893 | 0,51512371  |
| A_24_P307289  | NM_198154       | TMEM95         | transmembrane protein 95                             | ENST00000389982 | 0,515020805 |

|                |                 |              |                                                                      |                 |             |
|----------------|-----------------|--------------|----------------------------------------------------------------------|-----------------|-------------|
| A_21_P0005931  | TCONS_00015252  | XLOC_006738  |                                                                      |                 | 0,515015602 |
| A_24_P411863   | NM_182931       | MLL5         | myeloid/lymphoid or mixed-lineage leukemia 5 (trithorax h            | ENST00000393656 | 0,514986386 |
| A_23_P67952    | NR_026766       | MYCNOS       | MYCN opposite strand/antisense RNA (non-protein coding)              |                 | 0,514982326 |
| A_23_P87279    | NM_014555       | TRPM5        | transient receptor potential cation channel, subfamily M, m          | ENST00000452833 | 0,514930803 |
| A_19_P00319990 | ENST00000551938 | LOC100506948 |                                                                      | ENST00000551938 | 0,514925006 |
| A_24_P220771   | NM_032217       | ANKRD17      | ankyrin repeat domain 17                                             | ENST00000411811 | 0,514784618 |
| A_21_P0008462  | TCONS_00022796  | XLOC_011074  |                                                                      |                 | 0,514751824 |
| A_33_P3313476  | NM_001136571    | ZAR1L        | zygote arrest 1-like                                                 | ENST00000345108 | 0,514740933 |
| A_33_P3382588  | NM_005430       | WNT1         | wingless-type MMTV integration site family, member 1                 | ENST00000380414 | 0,514727816 |
| A_23_P59677    | NM_021930       | RINT1        | RAD50 interactor 1                                                   | ENST00000497979 | 0,514613698 |
| A_33_P3209283  | ENST00000367469 | SASH1        | SAM and SH3 domain containing 1                                      | ENST00000367469 | 0,514566783 |
| A_21_P0000296  | NR_002913       | SNORD63      | small nucleolar RNA, C/D box 63                                      |                 | 0,514501462 |
| A_23_P109913   | NM_006564       | CXCR6        | chemokine (C-X-C motif) receptor 6                                   | ENST00000438735 | 0,514445602 |
| A_21_P0005572  | TCONS_00014189  | XLOC_006198  |                                                                      |                 | 0,514388339 |
| A_23_P162037   | NM_001030273    | ARNTL        | aryl hydrocarbon receptor nuclear translocator-like                  | ENST00000389708 | 0,514346288 |
| A_19_P00321230 | NR_026921       | LOC202181    | chromosome 5 open reading frame 25 pseudogene                        |                 | 0,514327616 |
| A_21_P0006980  | TCONS_00018462  | XLOC_008760  |                                                                      |                 | 0,514322684 |
| A_33_P3368560  | BC050395        | AHSA2        | AHA1, activator of heat shock 90kDa protein ATPase homolog 2 (yeast) |                 | 0,514320983 |
| A_24_P941922   | ENST00000315544 | CNOT4        | CCR4-NOT transcription complex, subunit 4                            | ENST00000315544 | 0,514196926 |
| A_33_P3392366  | XR_132755       | LOC100128366 | uncharacterized LOC100128366                                         |                 | 0,514037349 |
| A_33_P3278560  | NM_001010879    | ZIK1         | zinc finger protein interacting with K protein 1 homolog (mc         | ENST00000356724 | 0,513824594 |
| A_23_P122615   | NM_032870       | PNISR        | PNN-interacting serine/arginine-rich protein                         | ENST00000438806 | 0,51378675  |
| A_23_P363831   | NM_033406       | FBXO3        | F-box protein 3                                                      | ENST00000532927 | 0,513484475 |
| A_32_P189204   | NM_174942       | GAS2L3       | growth arrest-specific 2 like 3                                      | ENST00000266754 | 0,513473748 |
| A_24_P223163   | NM_138386       | NAF1         | nuclear assembly factor 1 homolog (S. cerevisiae)                    | ENST00000422287 | 0,513166477 |
| A_24_P237613   | NM_182488       | USP12        | ubiquitin specific peptidase 12                                      | ENST00000282344 | 0,513035664 |
| A_23_P25150    | NM_006897       | HOXC9        | homeobox C9                                                          | ENST00000508190 | 0,513001277 |
| A_21_P0007578  | TCONS_00020465  | XLOC_009798  |                                                                      |                 | 0,512994838 |
| A_21_P0002841  | ENST00000424242 | XLOC_003057  |                                                                      | ENST00000424242 | 0,512957615 |

|                |                 |              |                                                                     |                 |             |
|----------------|-----------------|--------------|---------------------------------------------------------------------|-----------------|-------------|
| A_23_P109636   | NM_015541       | LRIG1        | leucine-rich repeats and immunoglobulin-like domains 1              | ENST00000383702 | 0,512935115 |
| A_33_P3300867  | AK124637        | LOC100506514 | uncharacterized LOC100506514                                        |                 | 0,512654588 |
| A_23_P116168   | NM_032424       | KIAA1826     | KIAA1826                                                            | ENST00000301919 | 0,512592532 |
| A_33_P3285877  | NR_038194       | C9orf146     | chromosome 9 open reading frame 146                                 | ENST00000381010 | 0,512384438 |
| A_33_P3292851  | ENST00000402301 | UBE2I        | ubiquitin-conjugating enzyme E2I                                    | ENST00000402301 | 0,512298097 |
| A_23_P387071   | NM_052857       | ZNF830       | zinc finger protein 830                                             | ENST00000361952 | 0,512226313 |
| A_33_P3273266  | NR_024380       | LOC441666    | zinc finger protein 91 pseudogene                                   |                 | 0,512174889 |
| A_23_P116168   | NM_032424       | KIAA1826     | KIAA1826                                                            | ENST00000301919 | 0,512095982 |
| A_33_P3299921  | XM_001719518    | LOC100128869 | uncharacterized LOC100128869                                        |                 | 0,511969856 |
| A_21_P0009248  | TCONS_00025394  | XLOC_012209  |                                                                     |                 | 0,511937894 |
| A_21_P0007870  | NR_028045       | KLRAP1       | killer cell lectin-like receptor subfamily A pseudogene 1           | ENST00000510134 | 0,511868326 |
| A_23_P101281   | NM_032828       | ZNF587       | zinc finger protein 587                                             | ENST00000339656 | 0,51183327  |
| A_23_P305616   | NR_015441       | LOC652276    | potassium channel tetramerisation domain containing 5 pseudogene    | ENST00000399702 | 0,511809054 |
| A_33_P3359683  | NM_001172128    | IL16         | interleukin 16                                                      | ENST00000394655 | 0,511708563 |
| A_23_P103276   | NM_138417       | KTI12        | KTI12 homolog, chromatin associated ( <i>S. cerevisiae</i> )        | ENST00000371614 | 0,511652755 |
| A_23_P79145    | NM_144694       | ZNF570       | zinc finger protein 570                                             | ENST00000330173 | 0,511591012 |
| A_33_P3571824  | NM_004829       | NCR1         | natural cytotoxicity triggering receptor 1                          | ENST00000291890 | 0,51157613  |
| A_33_P3306659  | AB002446        | LOC728254    | uncharacterized LOC728254                                           |                 | 0,51156564  |
| A_33_P3387971  | AK124342        | FLJ42351     | uncharacterized LOC400999                                           |                 | 0,511562297 |
| A_33_P3262292  | NM_015562       | UBXN7        | UBX domain protein 7                                                | ENST00000535858 | 0,511423102 |
| A_33_P3253747  | NM_000761       | CYP1A2       | cytochrome P450, family 1, subfamily A, polypeptide 2               | ENST00000343932 | 0,511414986 |
| A_33_P3379341  | NM_001144931    | LOC391322    | D-dopachrome tautomerase-like                                       |                 | 0,511410427 |
| A_23_P168276   | NM_004865       | TBPL1        | TBP-like 1                                                          | ENST00000237264 | 0,511357394 |
| A_24_P261383   | NM_024116       | TAF1D        | TATA box binding protein (TBP)-associated factor, RNA polymerase II | ENST00000527068 | 0,511306671 |
| A_33_P3387320  | ENST00000409000 | RPL31        | ribosomal protein L31                                               | ENST00000409000 | 0,51127502  |
| A_24_P132008   | NM_002449       | MSX2         | msh homeobox 2                                                      | ENST00000239243 | 0,511150698 |
| A_33_P3258003  | NM_152788       | ANKS1B       | ankyrin repeat and sterile alpha motif domain containing 1E         | ENST00000329257 | 0,511091632 |
| A_19_P00319404 | NR_026807       | LINC00472    | long intergenic non-protein coding RNA 472                          |                 | 0,511071729 |
| A_24_P729905   | NM_001077685    | AGAP7        | ArfGAP with GTPase domain, ankyrin repeat and PH domain             | ENST00000490752 | 0,511061201 |

|                |                   |                |                                                                |                 |             |
|----------------|-------------------|----------------|----------------------------------------------------------------|-----------------|-------------|
| A_24_P583225   | NR_026999         | LINC00265      | long intergenic non-protein coding RNA 265                     | ENST00000423687 | 0,511060124 |
| A_21_P0003711  | ENST00000411638   | WHSC2          | Wolf-Hirschhorn syndrome candidate 2                           | ENST00000411638 | 0,510923611 |
| A_23_P219084   | NM_032924         | ZNF3           | zinc finger protein 3                                          | ENST00000487620 | 0,510914236 |
| A_24_P217234   | NM_000341         | SLC3A1         | solute carrier family 3 (cystine, dibasic and neutral amino ac | ENST00000540334 | 0,510901955 |
| A_33_P3223338  | NR_024426         | PARVG          | parvin, gamma                                                  | ENST00000475485 | 0,510831272 |
| A_23_P116168   | NM_032424         | KIAA1826       | KIAA1826                                                       | ENST00000301919 | 0,510778954 |
| A_24_P56689    | NM_003456         | ZNF205         | zinc finger protein 205                                        | ENST00000219091 | 0,510575174 |
| A_23_P326204   | NM_152621         | SGMS2          | sphingomyelin synthase 2                                       | ENST00000394686 | 0,510406165 |
| A_33_P3364308  | BC040551          | OTOA           | otoancorin                                                     |                 | 0,510404494 |
| A_21_P0008982  | TCONS_00024487    | XLOC_011806    |                                                                |                 | 0,510361155 |
| A_19_P00319625 | BC035182          | LOC729178      | uncharacterized LOC729178                                      |                 | 0,510262096 |
| A_19_P00318189 | NR_038889         | LOC401320      | uncharacterized LOC401320                                      | ENST00000434399 | 0,510233738 |
| A_21_P0010839  | TCONS_I2_00003163 | XLOC_I2_001683 |                                                                |                 | 0,510146775 |
| A_33_P3236642  | NM_198551         | MIA3           | melanoma inhibitory activity family, member 3                  | ENST00000344507 | 0,510132747 |
| A_23_P14649    | NR_026808         | ANP32A-IT1     | ANP32A intronic transcript 1 (non-protein coding)              |                 | 0,510128729 |
| A_21_P0005900  | TCONS_00015162    | XLOC_007207    |                                                                |                 | 0,510110804 |
| A_23_P307536   | ENST00000480549   | SH3D21         | SH3 domain containing 21                                       | ENST00000480549 | 0,510066006 |
| A_23_P93629    | NM_015905         | TRIM24         | tripartite motif containing 24                                 | ENST00000415680 | 0,509973103 |
| A_23_P372467   | NM_152392         | AHSA2          | AHA1, activator of heat shock 90kDa protein ATPase homol       | ENST00000484217 | 0,509895856 |
| A_21_P0010642  | ENST00000430316   | XLOC_I2_001064 |                                                                | ENST00000430316 | 0,509830504 |
| A_23_P167194   | NM_001812         | CENPC1         | centromere protein C 1                                         | ENST00000506882 | 0,509726118 |
| A_23_P17382    | NM_022095         | ZNF335         | zinc finger protein 335                                        | ENST00000426788 | 0,509650571 |
| A_23_P132784   | NM_001013439      | FXR1           | fragile X mental retardation, autosomal homolog 1              | ENST00000472339 | 0,509565546 |
| A_23_P10815    | NM_001020658      | PUM1           | pumilio homolog 1 (Drosophila)                                 | ENST00000257075 | 0,509562607 |
| A_33_P3316562  | NM_182398         | RPS6KA5        | ribosomal protein S6 kinase, 90kDa, polypeptide 5              | ENST00000418736 | 0,509535121 |
| A_23_P420196   | NM_003745         | SOCS1          | suppressor of cytokine signaling 1                             | ENST00000332029 | 0,509505765 |
| A_21_P0009928  | DA407032          | XLOC_013437    |                                                                |                 | 0,509476463 |
| A_33_P3355407  | NR_004404         | RNU105A        | RNA, U105A small nucleolar                                     | ENST00000437681 | 0,509368689 |
| A_33_P3273969  | NM_014827         | ZC3H11A        | zinc finger CCCH-type containing 11A                           | ENST00000367214 | 0,509249432 |



|               |                 |              |                                                                        |                 |             |
|---------------|-----------------|--------------|------------------------------------------------------------------------|-----------------|-------------|
| A_21_P0008919 | TCONS_00024360  | XLOC_011682  |                                                                        |                 | 0,509196596 |
| A_21_P0014314 | XR_109247       | LOC100507458 | uncharacterized LOC100507458                                           |                 | 0,509195785 |
| A_33_P3332970 | NM_005127       | CLEC2B       | C-type lectin domain family 2, member B                                |                 | 0,509043823 |
| A_33_P3329793 | NR_003228       | AFG3L1P      | AFG3 ATPase family gene 3-like 1 ( <i>S. cerevisiae</i> ), pseudogener | ENST00000355531 | 0,508951619 |
| A_33_P3331882 | NM_001098482    | CRTC1        | CREB regulated transcription coactivator 1                             | ENST00000262813 | 0,508899238 |
| A_24_P399083  | NM_017853       | TXNL4B       | thioredoxin-like 4B                                                    | ENST00000423037 | 0,50885782  |
| A_33_P3361398 | ENST00000382477 | C19orf26     | chromosome 19 open reading frame 26                                    | ENST00000382477 | 0,508812393 |
| A_33_P3376444 | AK127260        | ZDHC23       | zinc finger, DHHC-type containing 23                                   | ENST00000488129 | 0,508807374 |
| A_21_P0007640 | TCONS_00020590  | XLOC_009907  |                                                                        |                 | 0,508740157 |
| A_21_P0001545 | XR_110473       | LOC100505821 | uncharacterized LOC100505821                                           |                 | 0,508701946 |
| A_21_P0007429 | AK123657        | XLOC_009079  |                                                                        |                 | 0,508665024 |
| A_33_P3356210 | NM_001202439    | B7H6         | B7 homolog 6                                                           | ENST00000338965 | 0,508595594 |
| A_24_P21715   | NM_004584       | RAD9A        | RAD9 homolog A ( <i>S. pombe</i> )                                     | ENST00000307980 | 0,508588428 |
| A_21_P0001900 | ENST00000419650 | XLOC_001620  |                                                                        | ENST00000419650 | 0,508562672 |
| A_23_P105545  | NM_016830       | VAMP1        | vesicle-associated membrane protein 1 (synaptobrevin 1)                | ENST00000535927 | 0,50849636  |
| A_33_P3275199 | NM_003724       | JRK          | jerky homolog (mouse)                                                  | ENST00000422119 | 0,508158303 |
| A_33_P3386532 | ENST00000464758 | MRPL38       | mitochondrial ribosomal protein L38                                    | ENST00000464758 | 0,5081344   |
| A_23_P97021   | NM_024852       | EIF2C3       | eukaryotic translation initiation factor 2C, 3                         | ENST00000373191 | 0,508080637 |
| A_23_P111865  | NM_145914       | ZSCAN21      | zinc finger and SCAN domain containing 21                              | ENST00000292450 | 0,507908723 |
| A_23_P120227  | NM_030915       | LBH          | limb bud and heart development homolog (mouse)                         | ENST00000395323 | 0,507831962 |
| A_21_P0010197 | ENST00000430001 | XLOC_014047  |                                                                        | ENST00000430001 | 0,507645024 |
| A_32_P191503  | NR_026999       | LINC00265    | long intergenic non-protein coding RNA 265                             |                 | 0,507626583 |
| A_33_P3343493 | NM_001470       | GABBR1       | gamma-aminobutyric acid (GABA) B receptor, 1                           | ENST00000466282 | 0,50756385  |
| A_21_P0006852 | TCONS_00018153  | XLOC_008440  |                                                                        |                 | 0,507539683 |
| A_33_P3292179 | NM_080283       | ABCA9        | ATP-binding cassette, sub-family A (ABC1), member 9                    | ENST00000370732 | 0,507395856 |
| A_23_P252748  | NM_007152       | ZNF195       | zinc finger protein 195                                                | ENST00000526601 | 0,507365082 |
| A_21_P0001469 | TCONS_00001393  | XLOC_000711  |                                                                        |                 | 0,507317075 |
| A_23_P101281  | NM_032828       | ZNF587       | zinc finger protein 587                                                | ENST00000339656 | 0,507298244 |
| A_23_P103276  | NM_138417       | KTI12        | KTI12 homolog, chromatin associated ( <i>S. cerevisiae</i> )           | ENST00000371614 | 0,507283857 |

|                |                  |                |                                                                           |                 |             |
|----------------|------------------|----------------|---------------------------------------------------------------------------|-----------------|-------------|
| A_23_P252748   | NM_007152        | ZNF195         | zinc finger protein 195                                                   | ENST00000526601 | 0,507254968 |
| A_21_P0000414  | NR_003210        | SNORD114-17    | small nucleolar RNA, C/D box 114-17                                       |                 | 0,507139395 |
| A_23_P101476   | NM_030824        | ZNF442         | zinc finger protein 442                                                   | ENST00000242804 | 0,507129272 |
| A_23_P252748   | NM_007152        | ZNF195         | zinc finger protein 195                                                   | ENST00000526601 | 0,507023843 |
| A_23_P56736    | NM_080386        | TUBA3D         | tubulin, alpha 3d                                                         | ENST00000321253 | 0,506973149 |
| A_23_P103414   | NM_016258        | YTHDF2         | YTH domain family, member 2                                               | ENST00000542507 | 0,506715806 |
| A_33_P3259148  | NM_001145045     | ZNF286B        | zinc finger protein 286B                                                  | ENST00000421016 | 0,506677904 |
| A_33_P3278392  | BX538347         | NFU1           | NFU1 iron-sulfur cluster scaffold homolog (S. cerevisiae)                 |                 | 0,506636279 |
| A_23_P111929   | NM_016023        | OTUD6B         | OTU domain containing 6B                                                  | ENST00000524027 | 0,506470185 |
| A_19_P00320579 | NR_015431        | FLJ43663       | uncharacterized LOC378805                                                 |                 | 0,506419139 |
| A_23_P116168   | NM_032424        | KIAA1826       | KIAA1826                                                                  | ENST00000301919 | 0,506370369 |
| A_23_P127676   | NM_014633        | CTR9           | Ctr9, Paf1/RNA polymerase II complex component, homolog                   | ENST00000361367 | 0,506319802 |
| A_23_P40956    | NM_016362        | GHRL           | ghrelin/obestatin prepropeptide                                           | ENST00000287656 | 0,506251099 |
| A_23_P255827   | AF300871         | FKSG2          | tumor protein, translationally-controlled 1 pseudogene                    |                 | 0,5062122   |
| A_33_P3212037  | ENST00000369475  | RNGTT          | RNA guanylyltransferase and 5'-phosphatase                                | ENST00000369475 | 0,506092556 |
| A_23_P104054   | NM_016227        | C1orf9         | chromosome 1 open reading frame 9                                         | ENST00000367723 | 0,506022787 |
| A_33_P3259403  | NM_175854        | PAN3           | PAN3 poly(A) specific ribonuclease subunit homolog (S. cerevisiae)        | ENST00000380958 | 0,505893082 |
| A_23_P360316   | NM_000149        | FUT3           | fucosyltransferase 3 (galactoside 3(4)-L-fucosyltransferase, alpha 3)     | ENST00000303225 | 0,505780604 |
| A_23_P36226    | NM_032315        | SLC25A33       | solute carrier family 25, member 33                                       | ENST00000302692 | 0,505753449 |
| A_23_P101281   | NM_032828        | ZNF587         | zinc finger protein 587                                                   | ENST00000339656 | 0,505708812 |
| A_32_P221958   | NM_001077685     | AGAP7          | ArfGAP with GTPase domain, ankyrin repeat and PH domain                   | ENST00000413193 | 0,505642037 |
| A_33_P3328921  | NR_024081        | C14orf165      | chromosome 14 open reading frame 165                                      |                 | 0,505520406 |
| A_21_P0006340  | ENST00000412339  | XLOC_007275    |                                                                           | ENST00000412339 | 0,505367103 |
| A_24_P340800   | NM_198484        | ZNF621         | zinc finger protein 621                                                   | ENST00000453351 | 0,505350536 |
| A_23_P122615   | NM_032870        | PNISR          | PNN-interacting serine/arginine-rich protein                              | ENST00000438806 | 0,505334728 |
| A_33_P3419545  | NM_001193478     | CDADC1         | cytidine and dCMP deaminase domain containing 1                           | ENST00000538056 | 0,50527291  |
| A_33_P3283669  | NM_152296        | ATP1A3         | ATPase, Na <sup>+</sup> /K <sup>+</sup> transporting, alpha 3 polypeptide | ENST00000545399 | 0,505266043 |
| A_33_P3414903  | ENST00000367550  | NPL            | N-acetylneuraminic acid pyruvate lyase (dihydrodipicolinate synthase)     | ENST00000367550 | 0,505142234 |
| A_21_P0011594  | TCONS_I2_0001081 | XLOC_I2_006101 |                                                                           |                 | 0,505110382 |

|                |                  |                |                                                              |                 |             |
|----------------|------------------|----------------|--------------------------------------------------------------|-----------------|-------------|
| A_21_P0000233  | NR_001456        | SNORD38A       | small nucleolar RNA, C/D box 38A                             |                 | 0,505059706 |
| A_23_P101281   | NM_032828        | ZNF587         | zinc finger protein 587                                      | ENST00000339656 | 0,505035031 |
| A_23_P7402     | NM_178140        | PDZD2          | PDZ domain containing 2                                      | ENST00000513490 | 0,505019299 |
| A_23_P101281   | NM_032828        | ZNF587         | zinc finger protein 587                                      | ENST00000339656 | 0,504843328 |
| A_23_P104054   | NM_016227        | C1orf9         | chromosome 1 open reading frame 9                            | ENST00000367723 | 0,504789439 |
| A_21_P0012830  | TCONS_I2_0002233 | XLOC_I2_011604 |                                                              |                 | 0,504729946 |
| A_23_P5586     | NM_005791        | MPHOSPH10      | M-phase phosphoprotein 10 (U3 small nucleolar ribonucleo     | ENST00000476969 | 0,504706412 |
| A_21_P0011093  | TCONS_I2_0000619 | XLOC_I2_003335 |                                                              |                 | 0,504668603 |
| A_33_P3228862  | NM_001129890     | LRR69          | leucine rich repeat containing 69                            | ENST00000343709 | 0,504655965 |
| A_33_P3319331  | AK123605         | PRDM2          | PR domain containing 2, with ZNF domain                      |                 | 0,504582962 |
| A_21_P0012598  | TCONS_I2_0002059 | XLOC_I2_010724 |                                                              |                 | 0,504389566 |
| A_23_P358662   | NM_001040157     | CEP44          | centrosomal protein 44kDa                                    | ENST00000503780 | 0,504378271 |
| A_23_P114084   | NM_000444        | PHEX           | phosphate regulating endopeptidase homolog, X-linked         | ENST00000537599 | 0,504152513 |
| A_33_P3344127  | NM_003512        | HIST1H2AC      | histone cluster 1, H2ac                                      | ENST00000377791 | 0,504018041 |
| A_21_P0001088  | ENST00000442483  | XLOC_000677    |                                                              | ENST00000442483 | 0,503956295 |
| A_23_P152995   | NM_001045        | SLC6A4         | solute carrier family 6 (neurotransmitter transporter, serot | ENST00000261707 | 0,503934009 |
| A_21_P0003885  | NM_002337        | LRPAP1         | low density lipoprotein receptor-related protein associated  | ENST00000500728 | 0,503866564 |
| A_33_P3324181  | AK096599         | LOC283112      | uncharacterized LOC283112                                    |                 | 0,503860308 |
| A_19_P00318715 | NR_015431        | FLJ43663       | uncharacterized LOC378805                                    |                 | 0,503836094 |
| A_33_P3397147  | NM_001009993     | FAM168B        | family with sequence similarity 168, member B                | ENST00000354183 | 0,503825563 |
| A_24_P36285    | NM_013398        | ZNF224         | zinc finger protein 224                                      | ENST00000336976 | 0,503806996 |
| A_33_P3328659  | NM_014246        | CELSR1         | cadherin, EGF LAG seven-pass G-type receptor 1 (flamingo l   | ENST00000262738 | 0,503798099 |
| A_21_P0000898  | NR_040073        | LOC100131234   | familial acute myelogenous leukemia related factor           |                 | 0,503769526 |
| A_33_P3279715  | NM_152896        | UHRF2          | ubiquitin-like with PHD and ring finger domains 2            | ENST00000381373 | 0,5037558   |
| A_23_P105012   | NM_017878        | HRASLS2        | HRAS-like suppressor 2                                       | ENST00000255695 | 0,503741892 |
| A_21_P0011580  | TCONS_I2_0001114 | XLOC_I2_006025 |                                                              |                 | 0,503656309 |
| A_23_P104054   | NM_016227        | C1orf9         | chromosome 1 open reading frame 9                            | ENST00000367723 | 0,503655653 |
| A_23_P116168   | NM_032424        | KIAA1826       | KIAA1826                                                     | ENST00000301919 | 0,503555811 |
| A_23_P202881   | NM_005103        | FEZ1           | fasciculation and elongation protein zeta 1 (zygin I)        | ENST00000528863 | 0,503538856 |

|               |                 |              |                                                                        |                 |             |
|---------------|-----------------|--------------|------------------------------------------------------------------------|-----------------|-------------|
| A_33_P3382147 | ENST00000487412 | STARD13      | StAR-related lipid transfer (START) domain containing 13               | ENST00000487412 | 0,50346389  |
| A_21_P0005759 | TCONS_00014849  | XLOC_006915  |                                                                        |                 | 0,503401825 |
| A_23_P111811  | NM_019071       | ING3         | inhibitor of growth family, member 3                                   | ENST00000427726 | 0,503339678 |
| A_33_P3376239 | NM_182931       | MLL5         | myeloid/lymphoid or mixed-lineage leukemia 5 (trithorax homologue 5)   | ENST00000257745 | 0,503299352 |
| A_23_P105545  | NM_016830       | VAMP1        | vesicle-associated membrane protein 1 (synaptobrevin 1)                | ENST00000535927 | 0,503033445 |
| A_33_P3394789 | XR_132982       | LOC100653296 | uncharacterized LOC100653296                                           |                 | 0,503015192 |
| A_21_P0005893 | TCONS_00015148  | XLOC_007191  |                                                                        |                 | 0,502841648 |
| A_33_P3218760 | NM_080599       | UPF2         | UPF2 regulator of nonsense transcripts homolog (yeast)                 | ENST00000397053 | 0,502825708 |
| A_21_P0002976 | TCONS_00006093  | XLOC_002702  |                                                                        |                 | 0,502771748 |
| A_24_P253780  | NM_145663       | DBF4B        | DBF4 homolog B ( <i>S. cerevisiae</i> )                                | ENST00000393547 | 0,502744566 |
| A_21_P0014355 | XR_109425       | LOC100134391 | uncharacterized LOC100134391                                           |                 | 0,502684678 |
| A_32_P101352  | NM_001025265    | CXorf65      | chromosome X open reading frame 65                                     | ENST00000438526 | 0,502646861 |
| A_23_P109636  | NM_015541       | LRIG1        | leucine-rich repeats and immunoglobulin-like domains 1                 | ENST00000383702 | 0,502466974 |
| A_23_P411922  | NM_001031698    | PRPF40B      | PRP40 pre-mRNA processing factor 40 homolog B ( <i>S. cerevisiae</i> ) | ENST00000261897 | 0,502348297 |
| A_33_P3285430 | ENST00000547640 | DNM1L        | dynamamin 1-like                                                       | ENST00000547640 | 0,502285136 |
| A_21_P0007004 | THC2671510      | XLOC_008855  |                                                                        |                 | 0,50220164  |
| A_23_P109072  | NM_020436       | SALL4        | sal-like 4 ( <i>Drosophila</i> )                                       | ENST00000371539 | 0,502166156 |
| A_23_P300090  | NM_032128       | SLC10A7      | solute carrier family 10 (sodium/bile acid cotransporter family)       | ENST00000394059 | 0,502128264 |
| A_33_P3342076 | NM_015866       | PRDM2        | PR domain containing 2, with ZNF domain                                | ENST00000400800 | 0,50209685  |
| A_33_P3378665 | NM_152332       | TC2N         | tandem C2 domains, nuclear                                             | ENST00000340892 | 0,501960599 |
| A_33_P3386506 | NM_001144961    | NFKBIL1      | nuclear factor of kappa light polypeptide gene enhancer in I           | ENST00000460131 | 0,501952672 |
| A_21_P0009514 | TCONS_00026394  | XLOC_012743  |                                                                        |                 | 0,501920346 |
| A_23_P101476  | NM_030824       | ZNF442       | zinc finger protein 442                                                | ENST00000242804 | 0,501889152 |
| A_23_P111860  | NM_018059       | RADIL        | Ras association and DIL domains                                        | ENST00000316919 | 0,501830121 |
| A_21_P0009114 | THC2669701      | XLOC_011819  |                                                                        |                 | 0,501820875 |
| A_21_P0000271 | NR_002588       | SNORA4       | small nucleolar RNA, H/ACA box 4                                       | ENST00000468362 | 0,501819483 |
| A_33_P3390177 | NR_033929       | FLJ34208     | uncharacterized LOC401106                                              |                 | 0,501790669 |
| A_33_P3225046 | NM_001025109    | CD34         | CD34 molecule                                                          | ENST00000367037 | 0,501775418 |
| A_21_P0004468 | TCONS_00010554  | XLOC_005081  |                                                                        |                 | 0,501655296 |

|                |                 |                |                                                                |                 |              |
|----------------|-----------------|----------------|----------------------------------------------------------------|-----------------|--------------|
| A_21_P0013577  | AL117574        | XLOC_I2_014830 |                                                                |                 | 0,5016029    |
| A_21_P0009677  | TCONS_00026870  | XLOC_012922    |                                                                |                 | 0,501588643  |
| A_23_P411833   | NM_145294       | WDR90          | WD repeat domain 90                                            | ENST00000547407 | 0,501550195  |
| A_23_P386364   | NM_144657       | HDX            | highly divergent homeobox                                      | ENST00000373177 | 0,5015248    |
| A_23_P356554   | NM_004282       | BAG2           | BCL2-associated athanogene 2                                   | ENST00000545080 | 0,501520171  |
| A_33_P3461039  | AK055712        | LOC728705      | uncharacterized LOC728705                                      |                 | 0,501395696  |
| A_19_P00809382 | NM_015048       | SETD1B         | SET domain containing 1B                                       | ENST00000267197 | 0,50116706   |
| A_23_P18055    | NR_024615       | C3orf51        | chromosome 3 open reading frame 51                             |                 | 0,501158764  |
| A_23_P54230    | NM_207660       | ZC3H14         | zinc finger CCCH-type containing 14                            | ENST00000557605 | 0,501103538  |
| A_23_P252748   | NM_007152       | ZNF195         | zinc finger protein 195                                        | ENST00000526601 | 0,501030811  |
| A_33_P3364038  | NM_001145805    | IRGM           | immunity-related GTPase family, M                              | ENST00000522154 | 0,501016857  |
| A_23_P139143   | NM_004177       | STX3           | syntaxin 3                                                     | ENST00000300150 | 0,500969881  |
| A_21_P0002543  | TCONS_00004592  | XLOC_002497    |                                                                |                 | 0,500893003  |
| A_21_P0014357  | ENST00000521847 | ENDOV          | endonuclease V                                                 | ENST00000521847 | 0,500751853  |
| A_23_P211785   | NM_003420       | ZNF35          | zinc finger protein 35                                         | ENST00000396056 | 0,500748706  |
| A_21_P0014412  | XR_109659       | LOC100289065   | uncharacterized LOC100289065                                   | ENST00000455275 | 0,500744115  |
| A_33_P3356245  | NM_017879       | ZNF416         | zinc finger protein 416                                        | ENST00000359489 | 0,500588449  |
| A_24_P269432   | NM_005868       | BET1           | blocked early in transport 1 homolog (S. cerevisiae)           | ENST00000222547 | 0,500583943  |
| A_33_P3839897  | DW419002        | RNU4ATAC       | RNA, U4atac small nuclear (U12-dependent splicing)             |                 | 0,500333557  |
| A_32_P30831    | NR_040058       | LOC100505648   | uncharacterized LOC100505648                                   |                 | 0,500297901  |
| A_23_P142590   | NM_030768       | ILKAP          | integrin-linked kinase-associated serine/threonine phosphatase | ENST00000479400 | 0,500238001  |
| A_21_P0002537  | TCONS_00004570  | XLOC_002477    |                                                                |                 | 0,500230843  |
| A_21_P0005679  | TCONS_00014664  | XLOC_006763    |                                                                |                 | 0,500212013  |
| A_33_P3327663  | ENST00000366877 | SUSD4          | sushi domain containing 4                                      | ENST00000366877 | 0,500181984  |
| A_23_P96688    | NM_016028       | SUV420H1       | suppressor of variegation 4-20 homolog 1 (Drosophila)          | ENST00000323599 | 0,500144288  |
| A_24_P340696   | NM_014509       | SERHL2         | serine hydrolase-like 2                                        | ENST00000455578 | 0,500077902  |
| A_24_P186342   | NM_020917       | ZFP14          | zinc finger protein 14 homolog (mouse)                         | ENST00000270001 | -0,500262571 |
| A_23_P122724   | NM_004665       | VNN2           | vanin 2                                                        | ENST00000392389 | -0,500362176 |
| A_21_P0009165  | ENST00000444464 | XLOC_012170    |                                                                | ENST00000444464 | -0,500392581 |



|                |                |              |                                                              |                 |              |
|----------------|----------------|--------------|--------------------------------------------------------------|-----------------|--------------|
| A_23_P102122   | NM_152862      | ARPC2        | actin related protein 2/3 complex, subunit 2, 34kDa          | ENST00000470146 | -0,500454888 |
| A_23_P10911    | NM_173542      | PLBD2        | phospholipase B domain containing 2                          | ENST00000280800 | -0,50049324  |
| A_23_P101319   | NM_152354      | ZNF285       | zinc finger protein 285                                      | ENST00000544719 | -0,500498271 |
| A_23_P7853     | NM_007058      | CAPN11       | calpain 11                                                   | ENST00000533604 | -0,500517674 |
| A_23_P148475   | NM_012310      | KIF4A        | kinesin family member 4A                                     | ENST00000544650 | -0,500589915 |
| A_23_P120594   | NM_032501      | ACSS1        | acyl-CoA synthetase short-chain family member 1              | ENST00000537502 | -0,500618704 |
| A_21_P0008950  | TCONS_00024424 | XLOC_011740  |                                                              |                 | -0,500633991 |
| A_23_P101093   | NM_016429      | COPZ2        | coatamer protein complex, subunit zeta 2                     | ENST00000006101 | -0,500669665 |
| A_33_P3423230  | NM_001184880   | PCDH19       | protocadherin 19                                             | ENST00000255531 | -0,500729127 |
| A_23_P402319   | NM_152687      | GAPT         | GRB2-binding adaptor protein, transmembrane                  | ENST00000318469 | -0,50073785  |
| A_21_P0000721  | NR_038206      | LOC100616530 | tospeak                                                      |                 | -0,50078471  |
| A_33_P3357843  | NM_000232      | SGCB         | sarcoglycan, beta (43kDa dystrophin-associated glycoprotein) | ENST00000381431 | -0,500804277 |
| A_33_P3392787  | NM_001008723   | CCDC147      | coiled-coil domain containing 147                            | ENST00000312902 | -0,500908737 |
| A_23_P121825   | NM_024941      | C5orf44      | chromosome 5 open reading frame 44                           | ENST00000545191 | -0,500910581 |
| A_23_P115824   | NM_012207      | HNRNPH3      | heterogeneous nuclear ribonucleoprotein H3 (2H9)             | ENST00000265866 | -0,501078031 |
| A_23_P150009   | NM_198046      | ZDHHC16      | zinc finger, DHHC-type containing 16                         | ENST00000487315 | -0,501102911 |
| A_24_P169386   | NM_001040710   | C2orf84      | chromosome 2 open reading frame 84                           | ENST00000456591 | -0,501229221 |
| A_23_P214459   | NM_000322      | PRPH2        | peripherin 2 (retinal degeneration, slow)                    | ENST00000230381 | -0,501330674 |
| A_23_P70355    | NM_004568      | SERPINB6     | serpin peptidase inhibitor, clade B (ovalbumin), member 6    | ENST00000380520 | -0,501341744 |
| A_23_P104762   | NM_006106      | YAP1         | Yes-associated protein 1                                     | ENST00000531439 | -0,501348598 |
| A_21_P0002221  | BI827896       | XLOC_001484  |                                                              |                 | -0,50138816  |
| A_23_P122863   | NM_001001555   | GRB10        | growth factor receptor-bound protein 10                      | ENST00000402497 | -0,501389604 |
| A_19_P00320622 | THC2519238     | XLOC_014192  |                                                              |                 | -0,501413735 |
| A_23_P114983   | NM_032588      | TRIM63       | tripartite motif containing 63                               | ENST00000374272 | -0,501425667 |
| A_24_P230514   | AK094424       | LOC100130924 | uncharacterized LOC100130924                                 |                 | -0,501429415 |
| A_19_P00320716 | BG211210       | XLOC_003204  |                                                              |                 | -0,501439746 |
| A_23_P122863   | NM_001001555   | GRB10        | growth factor receptor-bound protein 10                      | ENST00000402497 | -0,501481718 |
| A_23_P103511   | NM_001085375   | C1orf226     | chromosome 1 open reading frame 226                          | ENST00000458626 | -0,501490508 |
| A_33_P3269678  | NR_015395      | LOC541471    | uncharacterized LOC541471                                    |                 | -0,501503023 |

|               |                 |                |                                                             |                 |              |
|---------------|-----------------|----------------|-------------------------------------------------------------|-----------------|--------------|
| A_23_P127088  | NM_024040       | CUEDC2         | CUE domain containing 2                                     | ENST00000369937 | -0,501610702 |
| A_21_P0010430 | TCONS_00029633  | XLOC_014288    |                                                             |                 | -0,501662125 |
| A_23_P24751   | NM_173810       | TTC9C          | tetratricopeptide repeat domain 9C                          | ENST00000532583 | -0,501668311 |
| A_24_P382765  | NM_005008       | NHP2L1         | NHP2 non-histone chromosome protein 2-like 1 (S. cerevisi   | ENST00000401959 | -0,501731378 |
| A_23_P35349   | NM_021738       | SVIL           | supervillin                                                 | ENST00000355867 | -0,501780723 |
| A_24_P193600  | NM_003450       | ZNF174         | zinc finger protein 174                                     | ENST00000268655 | -0,50180331  |
| A_23_P129801  | NM_006822       | RAB40B         | RAB40B, member RAS oncogene family                          | ENST00000269347 | -0,50187997  |
| A_33_P3221253 | NM_005578       | LPP            | LIM domain containing preferred translocation partner in li | ENST00000312675 | -0,501891423 |
| A_23_P169003  | NM_022071       | SH2D4A         | SH2 domain containing 4A                                    | ENST00000519207 | -0,501893721 |
| A_33_P3306163 | NM_001177388    | LGALS3         | lectin, galactoside-binding, soluble, 3                     | ENST00000556322 | -0,501990426 |
| A_23_P310582  | NM_138729       | ST7L           | suppression of tumorigenicity 7 like                        | ENST00000418497 | -0,501994382 |
| A_21_P0014166 | XR_108672       | LOC100506379   | uncharacterized LOC100506379                                |                 | -0,502038207 |
| A_21_P0011221 | ENST00000413501 | XLOC_l2_003911 |                                                             | ENST00000413501 | -0,502127364 |
| A_21_P0004380 | BX098598        | XLOC_004799    |                                                             |                 | -0,502232503 |
| A_23_P258483  | NM_024669       | ANKRD55        | ankyrin repeat domain 55                                    | ENST00000434982 | -0,502258151 |
| A_33_P3352103 | NM_138794       | LYPLAL1        | lysophospholipase-like 1                                    | ENST00000366927 | -0,502292058 |
| A_23_P203900  | NM_005505       | SCARB1         | scavenger receptor class B, member 1                        | ENST00000376788 | -0,502302305 |
| A_33_P3383866 | NM_016381       | TREX1          | three prime repair exonuclease 1                            | ENST00000422277 | -0,502336105 |
| A_23_P169629  | NM_005412       | SHMT2          | serine hydroxymethyltransferase 2 (mitochondrial)           | ENST00000554467 | -0,502379597 |
| A_33_P3417532 | NM_001199799    | ILDR1          | immunoglobulin-like domain containing receptor 1            | ENST00000344209 | -0,50241236  |
| A_23_P124837  | NM_002332       | LRP1           | low density lipoprotein receptor-related protein 1          | ENST00000556356 | -0,502495109 |
| A_23_P122796  | NM_016063       | HDDC2          | HD domain containing 2                                      | ENST00000398153 | -0,502521008 |
| A_23_P117782  | NM_018357       | LARP6          | La ribonucleoprotein domain family, member 6                | ENST00000299213 | -0,502816872 |
| A_23_P120931  | NM_014508       | APOBEC3C       | apolipoprotein B mRNA editing enzyme, catalytic polypepti   | ENST00000361441 | -0,503009193 |
| A_33_P3400763 | NM_001080400    | PLIN4          | perilipin 4                                                 | ENST00000301286 | -0,503014494 |
| A_23_P124837  | NM_002332       | LRP1           | low density lipoprotein receptor-related protein 1          | ENST00000556356 | -0,503019519 |
| A_23_P120931  | NM_014508       | APOBEC3C       | apolipoprotein B mRNA editing enzyme, catalytic polypepti   | ENST00000361441 | -0,503026813 |
| A_23_P24922   | NM_001144869    | LIPT2          | lipoyl(octanoyl) transferase 2 (putative)                   | ENST00000310109 | -0,503075479 |
| A_23_P61531   | NM_000404       | GLB1           | galactosidase, beta 1                                       | ENST00000445488 | -0,503096319 |

|               |                  |                |                                                             |                 |              |
|---------------|------------------|----------------|-------------------------------------------------------------|-----------------|--------------|
| A_23_P102122  | NM_152862        | ARPC2          | actin related protein 2/3 complex, subunit 2, 34kDa         | ENST00000470146 | -0,503193111 |
| A_32_P152195  | NM_198993        | STAC2          | SH3 and cysteine rich domain 2                              | ENST00000333461 | -0,503239639 |
| A_24_P269619  | NM_001359        | DECR1          | 2,4-dienoyl CoA reductase 1, mitochondrial                  | ENST00000518725 | -0,503322078 |
| A_23_P99891   | NM_022566        | MESDC1         | mesoderm development candidate 1                            | ENST00000267984 | -0,50351     |
| A_23_P387552  | NM_000966        | RARG           | retinoic acid receptor, gamma                               | ENST00000425354 | -0,503512035 |
| A_24_P6428    | NM_022106        | C20orf177      | chromosome 20 open reading frame 177                        | ENST00000358293 | -0,503515724 |
| A_33_P3297050 | NM_033087        | ALG2           | asparagine-linked glycosylation 2, alpha-1,3-mannosyltransf | ENST00000238477 | -0,503525934 |
| A_33_P3353732 | AK092544         | LOC100131581   | uncharacterized LOC100131581                                |                 | -0,503543827 |
| A_21_P0010473 | BC040576         | XLOC_014323    |                                                             | ENST00000422876 | -0,50366378  |
| A_23_P164826  | NM_006397        | RNASEH2A       | ribonuclease H2, subunit A                                  | ENST00000221486 | -0,503707359 |
| A_23_P103398  | NM_000447        | PSEN2          | presenilin 2 (Alzheimer disease 4)                          | ENST00000366783 | -0,503740433 |
| A_23_P41390   | NM_018986        | SH3TC1         | SH3 domain and tetratricopeptide repeats 1                  | ENST00000502669 | -0,503805223 |
| A_24_P23995   | NM_001010858     | RNF187         | ring finger protein 187                                     | ENST00000463833 | -0,50381702  |
| A_24_P911094  | ENST00000376439  | RABL2A         | RAB, member of RAS oncogene family-like 2A                  | ENST00000376439 | -0,50397626  |
| A_23_P115356  | NM_003689        | AKR7A2         | aldo-keto reductase family 7, member A2 (aflatoxin aldehyc  | ENST00000235835 | -0,504058497 |
| A_33_P3237669 | NM_144688        | CCDC155        | coiled-coil domain containing 155                           | ENST00000447857 | -0,504109338 |
| A_21_P0010528 | TCONS_I2_0000027 | XLOC_I2_000196 |                                                             |                 | -0,504119202 |
| A_23_P106405  | NM_002487        | NDN            | necdin homolog (mouse)                                      | ENST00000331837 | -0,504129079 |
| A_33_P3381870 | NM_001978        | EPB49          | erythrocyte membrane protein band 4.9 (dematin)             | ENST00000358242 | -0,504130567 |
| A_24_P202581  | NM_199002        | ARHGEF1        | Rho guanine nucleotide exchange factor (GEF) 1              | ENST00000378152 | -0,50424923  |
| A_33_P3234899 | NM_002795        | PSMB3          | proteasome (prosome, macropain) subunit, beta type, 3       | ENST00000225426 | -0,504373128 |
| A_23_P9255    | NM_003177        | SYK            | spleen tyrosine kinase                                      | ENST00000375754 | -0,504393055 |
| A_23_P9255    | NM_003177        | SYK            | spleen tyrosine kinase                                      | ENST00000375754 | -0,504495356 |
| A_33_P3394213 | NM_138690        | GRIN3B         | glutamate receptor, ionotropic, N-methyl-D-aspartate 3B     | ENST00000234389 | -0,504505492 |
| A_23_P115356  | NM_003689        | AKR7A2         | aldo-keto reductase family 7, member A2 (aflatoxin aldehyc  | ENST00000235835 | -0,504601074 |
| A_23_P212617  | NM_003234        | TFRC           | transferrin receptor (p90, CD71)                            | ENST00000392396 | -0,504611092 |
| A_23_P122724  | NM_004665        | VNN2           | vanin 2                                                     | ENST00000392389 | -0,504644551 |
| A_23_P100441  | NM_024946        | FAM192A        | family with sequence similarity 192, member A               | ENST00000309137 | -0,50465978  |
| A_23_P334608  | NM_000181        | GUSB           | glucuronidase, beta                                         | ENST00000345660 | -0,504768704 |

|               |                 |                |                                                                      |                 |              |
|---------------|-----------------|----------------|----------------------------------------------------------------------|-----------------|--------------|
| A_32_P183918  | NR_033851       | MGC39372       | serpin peptidase inhibitor, clade B (ovalbumin), member 9 pseudogene |                 | -0,504786502 |
| A_23_P104438  | NM_032578       | MYPN           | myopalladin                                                          | ENST00000354393 | -0,504816138 |
| A_21_P0008539 | TCONS_00023122  | XLOC_011056    |                                                                      |                 | -0,504904911 |
| A_21_P0004657 | ENST00000456887 | XLOC_005331    |                                                                      | ENST00000456887 | -0,505006089 |
| A_23_P500400  | NM_080284       | ABCA6          | ATP-binding cassette, sub-family A (ABC1), member 6                  | ENST00000284425 | -0,505146092 |
| A_21_P0010512 | NR_040065       | LOC728716      | uncharacterized LOC728716                                            | ENST00000456897 | -0,505273302 |
| A_24_P416131  | NM_021149       | COTL1          | coactosin-like 1 (Dictyostelium)                                     | ENST00000262428 | -0,505330999 |
| A_21_P0014346 | XR_109386       | LOC100505899   | uncharacterized LOC100505899                                         |                 | -0,505386962 |
| A_32_P52153   | NR_038453       | LOC728978      | uncharacterized LOC728978                                            | ENST00000447119 | -0,505448621 |
| A_24_P391260  | NM_004339       | PTTG1IP        | pituitary tumor-transforming 1 interacting protein                   | ENST00000494690 | -0,505462409 |
| A_33_P3393360 | AK124783        | LOC100130927   | uncharacterized LOC100130927                                         |                 | -0,505595717 |
| A_33_P3267799 | NM_006847       | LILRB4         | leukocyte immunoglobulin-like receptor, subfamily B (with            | ENST00000270452 | -0,505599274 |
| A_33_P3277198 | NM_004854       | CHST10         | carbohydrate sulfotransferase 10                                     | ENST00000409701 | -0,505625268 |
| A_21_P0011922 | THC2684423      | XLOC_I2_008043 |                                                                      |                 | -0,505709849 |
| A_33_P3310475 | NM_018243       | Sep-11         | septin 11                                                            | ENST00000264893 | -0,505771725 |
| A_23_P55504   | NM_002551       | OR3A2          | olfactory receptor, family 3, subfamily A, member 2                  | ENST00000408891 | -0,505910416 |
| A_24_P75072   | NM_014311       | SMUG1          | single-strand-selective monofunctional uracil-DNA glycosylase        | ENST00000503306 | -0,505966372 |
| A_23_P23783   | NM_000261       | MYOC           | myocilin, trabecular meshwork inducible glucocorticoid response      | ENST00000536591 | -0,50612927  |
| A_23_P153360  | NM_024104       | C19orf42       | chromosome 19 open reading frame 42                                  | ENST00000487803 | -0,506198784 |
| A_23_P217946  | NM_022124       | CDH23          | cadherin-related 23                                                  | ENST00000299366 | -0,506265476 |
| A_23_P122863  | NM_001001555    | GRB10          | growth factor receptor-bound protein 10                              | ENST00000402497 | -0,506315098 |
| A_24_P54485   | NM_032357       | CCDC115        | coiled-coil domain containing 115                                    | ENST00000437688 | -0,506347933 |
| A_24_P12904   | NM_032012       | C9orf5         | chromosome 9 open reading frame 5                                    | ENST00000482868 | -0,506380189 |
| A_23_P104972  | NM_023945       | MS4A5          | membrane-spanning 4-domains, subfamily A, member 5                   | ENST00000300190 | -0,506402983 |
| A_33_P3253440 | NM_152391       | PQLC3          | PQ loop repeat containing 3                                          | ENST00000487471 | -0,506461154 |
| A_24_P298013  | NM_019096       | GTPBP2         | GTP binding protein 2                                                | ENST00000434548 | -0,506474318 |
| A_23_P212617  | NM_003234       | TFRC           | transferrin receptor (p90, CD71)                                     | ENST00000392396 | -0,506529129 |
| A_23_P203743  | NM_012296       | GAB2           | GRB2-associated binding protein 2                                    | ENST00000361507 | -0,506549208 |
| A_23_P102864  | NM_002772       | TMPRSS15       | transmembrane protease, serine 15                                    | ENST00000284885 | -0,506670944 |

|                |                 |                |                                                             |                 |              |
|----------------|-----------------|----------------|-------------------------------------------------------------|-----------------|--------------|
| A_19_P00806765 | NR_034096       | FONG           | uncharacterized LOC348751                                   | ENST00000416668 | -0,506929161 |
| A_23_P120931   | NM_014508       | APOBEC3C       | apolipoprotein B mRNA editing enzyme, catalytic polypeptide | ENST00000361441 | -0,506929602 |
| A_33_P3367106  | NR_003242       | PFN1P2         | profilin 1 pseudogene 2                                     |                 | -0,506967919 |
| A_21_P0002379  | TCONS_00004094  | XLOC_001929    |                                                             |                 | -0,506968377 |
| A_23_P414519   | NM_016588       | NRN1           | neuritin 1                                                  | ENST00000495850 | -0,507025432 |
| A_23_P208674   | NM_175063       | C19orf63       | chromosome 19 open reading frame 63                         | ENST00000376918 | -0,507065064 |
| A_23_P147431   | NM_002350       | LYN            | v-yes-1 Yamaguchi sarcoma viral related oncogene homolog    | ENST00000519728 | -0,507080716 |
| A_33_P3245434  | ENST00000519496 | TBC1D3         | TBC1 domain family, member 3                                | ENST00000519496 | -0,507093387 |
| A_21_P0010703  | ENST00000443284 | XLOC_I2_000217 |                                                             | ENST00000443284 | -0,507300558 |
| A_24_P319364   | NM_016946       | F11R           | F11 receptor                                                | ENST00000368026 | -0,507373577 |
| A_21_P0013591  | XR_108989       | LOC100507540   | uncharacterized LOC100507540                                |                 | -0,507504245 |
| A_23_P122863   | NM_001001555    | GRB10          | growth factor receptor-bound protein 10                     | ENST00000402497 | -0,507541684 |
| A_24_P404033   | NM_182616       | C15orf38       | chromosome 15 open reading frame 38                         | ENST00000460685 | -0,507561533 |
| A_21_P0012324  | ENST00000444848 | XLOC_I2_009363 |                                                             | ENST00000444848 | -0,507591681 |
| A_23_P103398   | NM_000447       | PSEN2          | presenilin 2 (Alzheimer disease 4)                          | ENST00000366783 | -0,507655441 |
| A_33_P3333317  | NM_001008211    | OPTN           | optineurin                                                  | ENST00000263036 | -0,507799175 |
| A_23_P380998   | NM_015361       | R3HDM1         | R3H domain containing 1                                     | ENST00000329971 | -0,507804634 |
| A_23_P126623   | NM_002631       | PGD            | phosphogluconate dehydrogenase                              | ENST00000541529 | -0,507846191 |
| A_19_P00319800 | NR_040074       | LOC100287225   | uncharacterized LOC100287225                                | ENST00000435144 | -0,507881479 |
| A_33_P3413098  | NR_024618       | LOC100129550   | uncharacterized LOC100129550                                |                 | -0,507909095 |
| A_23_P251421   | NM_031942       | CDCA7          | cell division cycle associated 7                            | ENST00000467411 | -0,508005717 |
| A_23_P118105   | NM_004548       | NDUFB10        | NADH dehydrogenase (ubiquinone) 1 beta subcomplex, 10,      | ENST00000268668 | -0,508012911 |
| A_23_P100022   | NM_014848       | SV2B           | synaptic vesicle glycoprotein 2B                            | ENST00000557410 | -0,508135288 |
| A_23_P124044   | NM_021008       | DEAF1          | deformed epidermal autoregulatory factor 1 (Drosophila)     | ENST00000527658 | -0,508150131 |
| A_33_P3741835  | AK127166        | ZCCHC23        | zinc finger, CCHC domain containing 23                      |                 | -0,508169773 |
| A_23_P115356   | NM_003689       | AKR7A2         | aldo-keto reductase family 7, member A2 (aflatoxin aldehyde | ENST00000235835 | -0,508254987 |
| A_23_P61960    | NM_145230       | ATP6V0E2       | ATPase, H <sup>+</sup> transporting V0 subunit e2           | ENST00000307445 | -0,508268537 |
| A_23_P45087    | NM_016220       | ZNF107         | zinc finger protein 107                                     | ENST00000423627 | -0,508302582 |
| A_23_P50990    | NM_024322       | CENPO          | centromere protein O                                        | ENST00000260662 | -0,508365286 |



|                |                 |                |                                                            |                 |              |
|----------------|-----------------|----------------|------------------------------------------------------------|-----------------|--------------|
| A_33_P3368830  | NM_001033667    | LY9            | lymphocyte antigen 9                                       | ENST00000368039 | -0,508487949 |
| A_33_P3266010  | NM_004292       | RIN1           | Ras and Rab interactor 1                                   | ENST00000424433 | -0,508545911 |
| A_23_P115645   | NM_001025076    | CELF2          | CUGBP, Elav-like family member 2                           | ENST00000537122 | -0,50855127  |
| A_23_P115645   | NM_001025076    | CELF2          | CUGBP, Elav-like family member 2                           | ENST00000537122 | -0,508573522 |
| A_21_P0010934  | ENST00000446200 | XLOC_I2_001851 |                                                            | ENST00000446200 | -0,508742998 |
| A_23_P122724   | NM_004665       | VNN2           | vanin 2                                                    | ENST00000392389 | -0,508767646 |
| A_21_P0007810  | TCONS_00021007  | XLOC_010268    |                                                            |                 | -0,50879112  |
| A_21_P0014587  | XR_110409       | LOC100507058   | uncharacterized LOC100507058                               | ENST00000417931 | -0,508867067 |
| A_33_P3330872  | NM_078629       | MSL3           | male-specific lethal 3 homolog (Drosophila)                | ENST00000380692 | -0,508903976 |
| A_21_P0012810  | ENST00000510975 | XLOC_I2_011309 |                                                            | ENST00000510975 | -0,50890942  |
| A_23_P11032    | NM_032591       | SLC9A7         | solute carrier family 9 (sodium/hydrogen exchanger), mem   | ENST00000491894 | -0,508951266 |
| A_21_P0011591  | NR_027412       | LOC100130581   | uncharacterized LOC100130581                               | ENST00000341011 | -0,508962231 |
| A_24_P295379   | NM_020960       | GPR107         | G protein-coupled receptor 107                             | ENST00000372406 | -0,508968701 |
| A_23_P117782   | NM_018357       | LARP6          | La ribonucleoprotein domain family, member 6               | ENST00000299213 | -0,5090578   |
| A_33_P3294509  | NM_000610       | CD44           | CD44 molecule (Indian blood group)                         | ENST00000263398 | -0,509086983 |
| A_21_P0010386  | NR_027036       | LOC100271722   | uncharacterized LOC100271722                               |                 | -0,509107006 |
| A_19_P00322856 | NM_001145191    | FAM200B        |                                                            | ENST00000502502 | -0,509113044 |
| A_23_P122724   | NM_004665       | VNN2           | vanin 2                                                    | ENST00000392389 | -0,509150074 |
| A_23_P44836    | NM_022908       | NT5DC2         | 5'-nucleotidase domain containing 2                        | ENST00000478091 | -0,509174623 |
| A_24_P130363   | NM_181482       | C18orf1        | chromosome 18 open reading frame 1                         | ENST00000359446 | -0,509237816 |
| A_21_P0014254  | XR_109026       | LOC645954      | supervillin pseudogene                                     |                 | -0,509309158 |
| A_33_P3234809  | NM_003466       | PAX8           | paired box 8                                               | ENST00000429538 | -0,509317154 |
| A_23_P115356   | NM_003689       | AKR7A2         | aldo-keto reductase family 7, member A2 (aflatoxin aldehyc | ENST00000235835 | -0,509395923 |
| A_23_P345674   | NM_021216       | ZNF71          | zinc finger protein 71                                     | ENST00000328070 | -0,509409703 |
| A_19_P00317141 | NR_034143       | LOC729177      | uncharacterized LOC729177                                  |                 | -0,509478813 |
| A_23_P64954    | NM_003481       | USP5           | ubiquitin specific peptidase 5 (isopeptidase T)            | ENST00000542371 | -0,509565907 |
| A_33_P3421338  | NM_001080443    | KIF18B         | kinesin family member 18B                                  | ENST00000376982 | -0,509663701 |
| A_23_P102122   | NM_152862       | ARPC2          | actin related protein 2/3 complex, subunit 2, 34kDa        | ENST00000470146 | -0,50971944  |
| A_24_P280113   | NM_001560       | IL13RA1        | interleukin 13 receptor, alpha 1                           | ENST00000371666 | -0,509724714 |

|                |                 |              |                                                            |                 |              |
|----------------|-----------------|--------------|------------------------------------------------------------|-----------------|--------------|
| A_21_P0011284  | NR_027293       | LOC96610     | BMS1 homolog, ribosome assembly protein (yeast) pseudo     | ENST00000426066 | -0,509732087 |
| A_24_P409230   | NM_001004460    | OR10A2       | olfactory receptor, family 10, subfamily A, member 2       | ENST00000307322 | -0,509747282 |
| A_24_P294982   | NM_016485       | VTA1         | Vps20-associated 1 homolog ( <i>S. cerevisiae</i> )        | ENST00000427932 | -0,509784866 |
| A_23_P88559    | NM_000236       | LIPC         | lipase, hepatic                                            | ENST00000356113 | -0,509875004 |
| A_23_P200096   | NM_025106       | SPSB1        | splA/ryanodine receptor domain and SOCS box containing 1   | ENST00000377399 | -0,50989601  |
| A_32_P40596    | NM_001204269    | KCNA2        | potassium voltage-gated channel, shaker-related subfamily, | ENST00000369770 | -0,50991337  |
| A_23_P109593   | NM_014346       | TBC1D22A     | TBC1 domain family, member 22A                             | ENST00000355704 | -0,509955325 |
| A_33_P3371219  | NM_002998       | SDC2         | syndecan 2                                                 |                 | -0,510067569 |
| A_33_P3402817  | NM_001145148    | CRHR1        | corticotropin releasing hormone receptor 1                 | ENST00000339069 | -0,510097837 |
| A_23_P140384   | NM_001911       | CTSG         | cathepsin G                                                | ENST00000216336 | -0,510179208 |
| A_19_P00322409 | NR_034115       | LOC729178    | uncharacterized LOC729178                                  |                 | -0,510294341 |
| A_24_P225961   | NM_004393       | DAG1         | dystroglycan 1 (dystrophin-associated glycoprotein 1)      | ENST00000308775 | -0,510305329 |
| A_21_P0005352  | AK024457        | LOC100288594 | uncharacterized LOC100288594                               |                 | -0,510310976 |
| A_23_P334608   | NM_000181       | GUSB         | glucuronidase, beta                                        | ENST00000345660 | -0,510322146 |
| A_23_P423331   | NM_032536       | NTNG2        | netrin G2                                                  | ENST00000360670 | -0,510372312 |
| A_23_P106874   | NM_031293       | PMFBP1       | polyamine modulated factor 1 binding protein 1             | ENST00000379073 | -0,510402348 |
| A_23_P86917    | NM_003824       | FADD         | Fas (TNFRSF6)-associated via death domain                  | ENST00000301838 | -0,510404111 |
| A_23_P357101   | NM_145298       | APOBEC3F     | apolipoprotein B mRNA editing enzyme, catalytic polypepti  | ENST00000308521 | -0,510432905 |
| A_19_P00321761 | ENST00000412979 | XLOC_002310  |                                                            | ENST00000412979 | -0,510477116 |
| A_33_P3251148  | NM_000714       | TSPO         | translocator protein (18kDa)                               | ENST00000329563 | -0,510511118 |
| A_24_P69691    | NM_145011       | ZNF25        | zinc finger protein 25                                     | ENST00000374633 | -0,510559195 |
| A_21_P0006455  | ENST00000416989 | XLOC_008184  |                                                            | ENST00000416989 | -0,510616504 |
| A_23_P112004   | NM_012472       | LRR6         | leucine rich repeat containing 6                           | ENST00000395414 | -0,510678477 |
| A_23_P362191   | NR_026951       | LINC00324    | long intergenic non-protein coding RNA 324                 | ENST00000315707 | -0,510745775 |
| A_23_P40821    | NM_032383       | HPS3         | Hermansky-Pudlak syndrome 3                                | ENST00000460822 | -0,510996958 |
| A_21_P0003693  | TCONS_00008368  | XLOC_003823  |                                                            |                 | -0,511008804 |
| A_21_P0008260  | DA144211        | XLOC_010670  |                                                            |                 | -0,5110243   |
| A_23_P118289   | NM_004765       | BCL7C        | B-cell CLL/lymphoma 7C                                     | ENST00000215115 | -0,511112733 |
| A_33_P3892608  | NM_198503       | KCNT2        | potassium channel, subfamily T, member 2                   | ENST00000294725 | -0,511125046 |

|               |                  |                |                                                           |                 |              |
|---------------|------------------|----------------|-----------------------------------------------------------|-----------------|--------------|
| A_24_P413988  | NM_006464        | TGOLN2         | trans-golgi network protein 2                             | ENST00000377386 | -0,511190584 |
| A_23_P12082   | NM_001025199     | CHI3L2         | chitinase 3-like 2                                        | ENST00000369748 | -0,511210958 |
| A_21_P0004231 | TCONS_00009878   | XLOC_004300    |                                                           |                 | -0,511218104 |
| A_23_P10385   | NM_016448        | DTL            | denticleless homolog (Drosophila)                         | ENST00000475419 | -0,511246037 |
| A_33_P3355703 | NM_001012706     | C14orf182      | chromosome 14 open reading frame 182                      | ENST00000399206 | -0,511263905 |
| A_23_P106874  | NM_031293        | PMFBP1         | polyamine modulated factor 1 binding protein 1            | ENST00000379073 | -0,51127502  |
| A_23_P206359  | NM_004360        | CDH1           | cadherin 1, type 1, E-cadherin (epithelial)               | ENST00000261769 | -0,511318646 |
| A_33_P3215363 | ENST00000407815  | TCF23          | transcription factor 23                                   | ENST00000407815 | -0,51134871  |
| A_32_P46214   | NM_173653        | SLC9A9         | solute carrier family 9 (sodium/hydrogen exchanger), mem1 | ENST00000316549 | -0,511358718 |
| A_23_P70249   | NM_001790        | CDC25C         | cell division cycle 25 homolog C (S. pombe)               | ENST00000356505 | -0,511363115 |
| A_33_P3236412 | NR_040115        | ANKRD62P1-PAF  | ANKRD62P1-PARP4P3 readthrough (non-protein coding)        | ENST00000338526 | -0,511395752 |
| A_32_P313405  | NM_005559        | LAMA1          | laminin, alpha 1                                          | ENST00000488064 | -0,51140534  |
| A_23_P309739  | NM_000125        | ESR1           | estrogen receptor 1                                       | ENST00000206249 | -0,511478453 |
| A_23_P103398  | NM_000447        | PSEN2          | presenilin 2 (Alzheimer disease 4)                        | ENST00000366783 | -0,51152313  |
| A_23_P162142  | NM_015516        | TSKU           | tsukushi small leucine rich proteoglycan homolog (Xenopus | ENST00000439807 | -0,511592564 |
| A_21_P0013651 | TCONS_I2_0002934 | XLOC_I2_015213 |                                                           |                 | -0,511609497 |
| A_33_P3409159 | NM_015482        | SLC22A23       | solute carrier family 22, member 23                       | ENST00000406686 | -0,511622508 |
| A_33_P3297930 | NM_005202        | COL8A2         | collagen, type VIII, alpha 2                              | ENST00000373172 | -0,511686201 |
| A_33_P3239332 | BC040725         | LOC284260      | uncharacterized LOC284260                                 |                 | -0,511695623 |
| A_23_P90804   | NM_145686        | MAP4K4         | mitogen-activated protein kinase kinase kinase kinase 4   | ENST00000414004 | -0,51169762  |
| A_23_P109593  | NM_014346        | TBC1D22A       | TBC1 domain family, member 22A                            | ENST00000355704 | -0,511698805 |
| A_24_P99046   | NM_015000        | STK38L         | serine/threonine kinase 38 like                           | ENST00000389032 | -0,511708961 |
| A_21_P0001102 | ENST00000447908  | XLOC_000710    |                                                           | ENST00000447908 | -0,511721547 |
| A_23_P124044  | NM_021008        | DEAF1          | deformed epidermal autoregulatory factor 1 (Drosophila)   | ENST00000527658 | -0,511725301 |
| A_21_P0009215 | TCONS_00025293   | XLOC_012095    |                                                           |                 | -0,511739039 |
| A_23_P114983  | NM_032588        | TRIM63         | tripartite motif containing 63                            | ENST00000374272 | -0,511777818 |
| A_23_P381102  | NM_207310        | CCDC74B        | coiled-coil domain containing 74B                         | ENST00000392984 | -0,511812873 |
| A_21_P0008873 | NM_001243722     | LOC729264      | TP53-target gene 3 protein-like                           | ENST00000360260 | -0,511939824 |
| A_23_P218369  | NM_032963        | CCL14          | chemokine (C-C motif) ligand 14                           | ENST00000536149 | -0,511971029 |

|               |                 |                |                                                                        |                 |              |
|---------------|-----------------|----------------|------------------------------------------------------------------------|-----------------|--------------|
| A_23_P119778  | NM_020342       | SLC39A10       | solute carrier family 39 (zinc transporter), member 10                 | ENST00000409086 | -0,512028456 |
| A_23_P255884  | NM_198252       | GSN            | gelsolin                                                               | ENST00000545652 | -0,512029726 |
| A_32_P99432   | NM_174894       | TRAPPC5        | trafficking protein particle complex 5                                 | ENST00000317378 | -0,512089407 |
| A_21_P0001447 | ENST00000442712 | XLOC_000642    |                                                                        | ENST00000442712 | -0,512227922 |
| A_33_P3738458 | NM_022648       | TNS1           | tensin 1                                                               | ENST00000171887 | -0,512242883 |
| A_23_P76015   | NM_014786       | ARHGEF17       | Rho guanine nucleotide exchange factor (GEF) 17                        | ENST00000263674 | -0,512303439 |
| A_33_P3318530 | NR_015364       | LOC441204      | uncharacterized LOC441204                                              |                 | -0,512333866 |
| A_23_P215832  | NM_004889       | ATP5J2         | ATP synthase, H <sup>+</sup> transporting, mitochondrial Fo complex, s | ENST00000394186 | -0,512349999 |
| A_23_P429560  | NM_018984       | SSH1           | slingshot homolog 1 (Drosophila)                                       | ENST00000546433 | -0,512370092 |
| A_23_P378690  | NM_001008495    | TMEM64         | transmembrane protein 64                                               | ENST00000458549 | -0,512401352 |
| A_23_P109171  | NM_001195       | BFSP1          | beaded filament structural protein 1, filensin                         | ENST00000536626 | -0,512455702 |
| A_23_P122077  | NM_016591       | GCNT4          | glucosaminyl (N-acetyl) transferase 4, core 2                          | ENST00000322348 | -0,512481589 |
| A_21_P0010277 | TCONS_00029116  | XLOC_014066    |                                                                        |                 | -0,512548691 |
| A_21_P0009711 | NR_026887       | LOC80054       | uncharacterized LOC80054                                               |                 | -0,512621514 |
| A_23_P115356  | NM_003689       | AKR7A2         | aldo-keto reductase family 7, member A2 (aflatoxin aldehyc             | ENST00000235835 | -0,512799159 |
| A_21_P0002203 | TCONS_00003655  | XLOC_001443    |                                                                        |                 | -0,51281285  |
| A_33_P3389634 | NM_001747       | CAPG           | capping protein (actin filament), gelsolin-like                        | ENST00000409724 | -0,512872517 |
| A_23_P104972  | NM_023945       | MS4A5          | membrane-spanning 4-domains, subfamily A, member 5                     | ENST00000300190 | -0,512962113 |
| A_21_P0014016 | XM_003403473    | LOC100652727   | uncharacterized LOC100652727                                           |                 | -0,513041864 |
| A_23_P113553  | NM_001011544    | MAGEA11        | melanoma antigen family A, 11                                          | ENST00000355220 | -0,513060183 |
| A_23_P212284  | NM_015426       | POC1A          | POC1 centriolar protein homolog A (Chlamydomonas)                      | ENST00000394970 | -0,513088393 |
| A_23_P114952  | NM_016456       | TMEM9          | transmembrane protein 9                                                | ENST00000472411 | -0,513199137 |
| A_24_P233850  | NM_003001       | SDHC           | succinate dehydrogenase complex, subunit C, integral mem               | ENST00000392169 | -0,513223968 |
| A_23_P108751  | NM_001039492    | FHL2           | four and a half LIM domains 2                                          | ENST00000358129 | -0,513230311 |
| A_24_P270829  | NM_000173       | GP1BA          | glycoprotein Ib (platelet), alpha polypeptide                          | ENST00000438881 | -0,513249397 |
| A_21_P0007565 | ENST00000548617 | XLOC_009769    |                                                                        | ENST00000548617 | -0,51336112  |
| A_23_P5131    | NM_016368       | ISYNA1         | inositol-3-phosphate synthase 1                                        | ENST00000317018 | -0,513471767 |
| A_23_P10305   | NM_175859       | CTPS2          | CTP synthase II                                                        | ENST00000380207 | -0,513476846 |
| A_21_P0012527 | ENST00000411596 | XLOC_I2_010083 |                                                                        | ENST00000411596 | -0,513487987 |

|               |                 |                |                                                              |                 |              |
|---------------|-----------------|----------------|--------------------------------------------------------------|-----------------|--------------|
| A_33_P3303577 | NM_198563       | TMEM110        | transmembrane protein 110                                    | ENST00000355083 | -0,513505246 |
| A_24_P346101  | NM_138492       | PRELID2        | PRELI domain containing 2                                    | ENST00000334744 | -0,513527671 |
| A_23_P147431  | NM_002350       | LYN            | v-yes-1 Yamaguchi sarcoma viral related oncogene homolog     | ENST00000519728 | -0,513528061 |
| A_23_P114952  | NM_016456       | TMEM9          | transmembrane protein 9                                      | ENST00000472411 | -0,513588222 |
| A_23_P210886  | NM_138578       | BCL2L1         | BCL2-like 1                                                  | ENST00000420653 | -0,513630778 |
| A_23_P120931  | NM_014508       | APOBEC3C       | apolipoprotein B mRNA editing enzyme, catalytic polypeptide  | ENST00000361441 | -0,513646287 |
| A_23_P103877  | NM_001010847    | LRRC38         | leucine rich repeat containing 38                            | ENST00000376085 | -0,513657894 |
| A_23_P19624   | NM_001718       | BMP6           | bone morphogenetic protein 6                                 | ENST00000283147 | -0,513702294 |
| A_23_P103398  | NM_000447       | PSEN2          | presenilin 2 (Alzheimer disease 4)                           | ENST00000366783 | -0,513787167 |
| A_33_P3247624 | NM_001029874    | REP15          | RAB15 effector protein                                       | ENST00000310791 | -0,513814568 |
| A_23_P406330  | NM_022733       | SMAP2          | small ArfGAP2                                                | ENST00000372718 | -0,513915145 |
| A_23_P102122  | NM_152862       | ARPC2          | actin related protein 2/3 complex, subunit 2, 34kDa          | ENST00000470146 | -0,513918988 |
| A_23_P212617  | NM_003234       | TFRC           | transferrin receptor (p90, CD71)                             | ENST00000392396 | -0,514142551 |
| A_23_P212617  | NM_003234       | TFRC           | transferrin receptor (p90, CD71)                             | ENST00000392396 | -0,514148391 |
| A_21_P0013363 | ENST00000443103 | XLOC_l2_013256 |                                                              | ENST00000443103 | -0,51415697  |
| A_23_P218675  | NM_006103       | WFDC2          | WAP four-disulfide core domain 2                             | ENST00000447118 | -0,514160356 |
| A_23_P361569  | NM_025181       | SLC35F5        | solute carrier family 35, member F5                          | ENST00000245680 | -0,514167579 |
| A_23_P121527  | NM_015990       | KLHL5          | kelch-like 5 (Drosophila)                                    | ENST00000544221 | -0,514216794 |
| A_23_P102122  | NM_152862       | ARPC2          | actin related protein 2/3 complex, subunit 2, 34kDa          | ENST00000470146 | -0,514233996 |
| A_23_P334608  | NM_000181       | GUSB           | glucuronidase, beta                                          | ENST00000345660 | -0,514243432 |
| A_24_P143189  | NM_021109       | TMSB4X         | thymosin beta 4, X-linked                                    | ENST00000380633 | -0,514347552 |
| A_21_P0011897 | NM_207366       | Sep-14         | septin 14                                                    | ENST00000388975 | -0,514358708 |
| A_23_P168551  | NM_001040661    | SLC29A4        | solute carrier family 29 (nucleoside transporters), member 4 | ENST00000439491 | -0,514500044 |
| A_23_P73589   | NM_002444       | MSN            | moesin                                                       | ENST00000360270 | -0,51451437  |
| A_23_P136978  | NM_014467       | SRPX2          | sushi-repeat containing protein, X-linked 2                  | ENST00000373004 | -0,514528215 |
| A_23_P106874  | NM_031293       | PMFBP1         | polyamine modulated factor 1 binding protein 1               | ENST00000379073 | -0,514540054 |
| A_23_P125829  | NM_000291       | PGK1           | phosphoglycerate kinase 1                                    | ENST00000537456 | -0,514571734 |
| A_23_P10518   | NM_016521       | TFDP3          | transcription factor Dp family, member 3                     | ENST00000310125 | -0,514577549 |
| A_21_P0009182 | ENST00000439041 | XLOC_012323    |                                                              | ENST00000439041 | -0,514582473 |



|                |                 |              |                                                                          |                 |              |
|----------------|-----------------|--------------|--------------------------------------------------------------------------|-----------------|--------------|
| A_23_P100127   | NM_170589       | CASC5        | cancer susceptibility candidate 5                                        | ENST00000260369 | -0,514589376 |
| A_23_P18490    | NM_001017405    | MAEA         | macrophage erythroblast attacher                                         | ENST00000382947 | -0,514640693 |
| A_23_P48561    | NM_005864       | EFS          | embryonal Fyn-associated substrate                                       | ENST00000216733 | -0,514673315 |
| A_19_P00801088 | ENST00000421640 | LOC100289026 |                                                                          | ENST00000421640 | -0,514777552 |
| A_33_P3231367  | NM_013236       | ATXN10       | ataxin 10                                                                | ENST00000381061 | -0,514799402 |
| A_24_P225635   | ENST00000449105 | HNRPLL       | heterogeneous nuclear ribonucleoprotein L-like                           | ENST00000449105 | -0,514800767 |
| A_23_P20107    | NM_015917       | GSTK1        | glutathione S-transferase kappa 1                                        | ENST00000494735 | -0,514832204 |
| A_23_P122863   | NM_001001555    | GRB10        | growth factor receptor-bound protein 10                                  | ENST00000402497 | -0,514839167 |
| A_23_P124837   | NM_002332       | LRP1         | low density lipoprotein receptor-related protein 1                       | ENST00000556356 | -0,514867605 |
| A_19_P00315718 | NM_001145191    | FAM200B      |                                                                          | ENST00000502502 | -0,514877082 |
| A_23_P125829   | NM_000291       | PGK1         | phosphoglycerate kinase 1                                                | ENST00000537456 | -0,514918441 |
| A_23_P113553   | NM_001011544    | MAGEA11      | melanoma antigen family A, 11                                            | ENST00000355220 | -0,514938243 |
| A_33_P3356696  | XM_001718943    | LOC100134409 | double homeobox protein 4-like                                           |                 | -0,51494603  |
| A_33_P3212112  | NM_001042496    | SLC12A6      | solute carrier family 12 (potassium/chloride transporters), r            | ENST00000354181 | -0,514966478 |
| A_23_P212617   | NM_003234       | TFRC         | transferrin receptor (p90, CD71)                                         | ENST00000392396 | -0,514970869 |
| A_23_P114952   | NM_016456       | TMEM9        | transmembrane protein 9                                                  | ENST00000472411 | -0,515050488 |
| A_33_P3353816  | NM_000885       | ITGA4        | integrin, alpha 4 (antigen CD49D, alpha 4 subunit of VLA-4 receptor)     |                 | -0,515120793 |
| A_24_P62860    | NM_005843       | STAM2        | signal transducing adaptor molecule (SH3 domain and ITAM                 | ENST00000263904 | -0,515140285 |
| A_21_P0014594  | XR_110451       | LOC100505820 | uncharacterized LOC100505820                                             | ENST00000411906 | -0,515148664 |
| A_21_P0004283  | TCONS_00010056  | XLOC_004504  |                                                                          |                 | -0,515185254 |
| A_21_P0004736  | XR_108683       | LOC100506885 | uncharacterized LOC100506885                                             |                 | -0,515193417 |
| A_23_P10497    | NM_198531       | ATP9B        | ATPase, class II, type 9B                                                | ENST00000543761 | -0,515257772 |
| A_19_P00320930 | ENST00000462931 | Q89B38       |                                                                          | ENST00000462931 | -0,51527545  |
| A_23_P257423   | NM_144988       | ALG14        | asparagine-linked glycosylation 14 homolog ( <i>S. cerevisiae</i> )      | ENST00000370205 | -0,515287232 |
| A_33_P3234984  | NM_031473       | IFT81        | intraflagellar transport 81 homolog ( <i>Chlamydomonas</i> )             | ENST00000361948 | -0,515330011 |
| A_33_P3215422  | NM_005583       | LYL1         | lymphoblastic leukemia derived sequence 1                                | ENST00000264824 | -0,515340244 |
| A_33_P3422035  | ENST00000392217 | FXYD5        | FXYD domain containing ion transport regulator 5                         | ENST00000392217 | -0,515362395 |
| A_21_P0002982  | THC2690346      | XLOC_002716  |                                                                          |                 | -0,515441102 |
| A_24_P91832    | NM_012069       | ATP1B4       | ATPase, Na <sup>+</sup> /K <sup>+</sup> transporting, beta 4 polypeptide | ENST00000218008 | -0,515495896 |

|                |                  |                |                                                                      |                 |  |              |
|----------------|------------------|----------------|----------------------------------------------------------------------|-----------------|--|--------------|
| A_21_P0012253  | TCONS_I2_0001762 | XLOC_I2_009312 |                                                                      |                 |  | -0,515539146 |
| A_23_P114095   | NM_015884        | MBTPS2         | membrane-bound transcription factor peptidase, site 2                | ENST00000379484 |  | -0,515553658 |
| A_23_P125829   | NM_000291        | PGK1           | phosphoglycerate kinase 1                                            | ENST00000537456 |  | -0,51556482  |
| A_33_P3281785  | NM_006167        | NKX3-1         | NK3 homeobox 1                                                       | ENST00000300332 |  | -0,51560918  |
| A_23_P118289   | NM_004765        | BCL7C          | B-cell CLL/lymphoma 7C                                               | ENST00000215115 |  | -0,515658909 |
| A_23_P9255     | NM_003177        | SYK            | spleen tyrosine kinase                                               | ENST00000375754 |  | -0,515683656 |
| A_23_P125829   | NM_000291        | PGK1           | phosphoglycerate kinase 1                                            | ENST00000537456 |  | -0,515696193 |
| A_24_P287043   | NM_006435        | IFITM2         | interferon induced transmembrane protein 2 (1-8D)                    | ENST00000527146 |  | -0,515702768 |
| A_24_P201739   | NM_005475        | SH2B3          | SH2B adaptor protein 3                                               | ENST00000341259 |  | -0,51579478  |
| A_24_P382253   | NM_018170        | RPRD1A         | regulation of nuclear pre-mRNA domain containing 1A                  | ENST00000357384 |  | -0,51580337  |
| A_19_P00320749 | NR_003367        | PVT1           |                                                                      |                 |  | -0,515840619 |
| A_23_P254079   | NM_003943        | STBD1          | starch binding domain 1                                              | ENST00000514365 |  | -0,51585874  |
| A_21_P0012094  | TCONS_I2_0001598 | XLOC_I2_008288 |                                                                      |                 |  | -0,515881266 |
| A_23_P49009    | NM_153613        | LPCAT4         | lysophosphatidylcholine acyltransferase 4                            | ENST00000314891 |  | -0,515931082 |
| A_23_P146512   | NM_016548        | GOLM1          | golgi membrane protein 1                                             | ENST00000388711 |  | -0,516037036 |
| A_33_P3239839  | NM_024963        | FBXL18         | F-box and leucine-rich repeat protein 18                             | ENST00000538679 |  | -0,516037064 |
| A_24_P275073   | NM_139155        | ADAMTS14       | ADAM metallopeptidase with thrombospondin type 1 motif               | ENST00000373208 |  | -0,516073812 |
| A_23_P117782   | NM_018357        | LARP6          | La ribonucleoprotein domain family, member 6                         | ENST00000299213 |  | -0,516083547 |
| A_23_P106103   | NM_004857        | AKAP5          | A kinase (PRKA) anchor protein 5                                     | ENST00000394718 |  | -0,516129474 |
| A_24_P100830   | NM_001113402     | AMN1           | antagonist of mitotic exit network 1 homolog (S. cerevisiae)         | ENST00000281471 |  | -0,516132079 |
| A_23_P392076   | NM_014574        | STRN3          | striatin, calmodulin binding protein 3                               | ENST00000555358 |  | -0,516228264 |
| A_23_P4754     | NM_006012        | CLPP           | ClpP caseinolytic peptidase, ATP-dependent, proteolytic subunit      | ENST00000245816 |  | -0,51636207  |
| A_21_P0001789  | ENST00000416111  | XLOC_002117    |                                                                      | ENST00000416111 |  | -0,516392665 |
| A_23_P202837   | NM_053056        | CCND1          | cyclin D1                                                            | ENST00000227507 |  | -0,516401534 |
| A_23_P106299   | NM_001018108     | SERF2          | small EDRK-rich factor 2                                             | ENST00000486144 |  | -0,516457371 |
| A_23_P104438   | NM_032578        | MYPN           | myopalladin                                                          | ENST00000354393 |  | -0,516505775 |
| A_23_P160849   | NM_004106        | FCER1G         | Fc fragment of IgE, high affinity I, receptor for; gamma polypeptide | ENST00000289902 |  | -0,516559717 |
| A_33_P3380493  | NM_031286        | SH3BGL3        | SH3 domain binding glutamic acid-rich protein like 3                 | ENST00000374243 |  | -0,516564254 |
| A_23_P216434   | ENST00000375540  | ECM2           | extracellular matrix protein 2, female organ and adipocyte specific  | ENST00000375540 |  | -0,516763323 |

|               |                |             |                                                            |                 |              |
|---------------|----------------|-------------|------------------------------------------------------------|-----------------|--------------|
| A_24_P106591  | NM_201280      | MUTED       | muted homolog (mouse)                                      | ENST00000244777 | -0,516857048 |
| A_33_P3389008 | NM_014394      | GHITM       | growth hormone inducible transmembrane protein             | ENST00000436406 | -0,516913996 |
| A_23_P110184  | NM_006745      | MSMO1       | methylsterol monooxygenase 1                               | ENST00000393766 | -0,516931936 |
| A_32_P135091  | NM_018301      | RBM41       | RNA binding motif protein 41                               | ENST00000372479 | -0,516933951 |
| A_23_P215735  | NM_018412      | ST7         | suppression of tumorigenicity 7                            | ENST00000443979 | -0,517003325 |
| A_23_P15375   | NM_024585      | ARMC7       | armadillo repeat containing 7                              | ENST00000245543 | -0,51705189  |
| A_23_P202939  | NM_001642      | APLP2       | amyloid beta (A4) precursor-like protein 2                 | ENST00000263574 | -0,517131732 |
| A_23_P163455  | NM_002373      | MAP1A       | microtubule-associated protein 1A                          | ENST00000399453 | -0,517134722 |
| A_33_P3319870 | NM_001191323   | GREM1       | gremlin 1                                                  | ENST00000322805 | -0,51721136  |
| A_33_P3618429 | AK095793       | PRKXP1      | protein kinase, X-linked, pseudogene 1                     |                 | -0,517249798 |
| A_23_P138507  | NM_001786      | CDK1        | cyclin-dependent kinase 1                                  | ENST00000448257 | -0,51731155  |
| A_23_P368067  | NM_018833      | TAP2        | transporter 2, ATP-binding cassette, sub-family B (MDR/TAF | ENST00000374899 | -0,517496809 |
| A_33_P3366053 | NM_001125      | ADPRH       | ADP-ribosylarginine hydrolase                              | ENST00000478399 | -0,517526973 |
| A_21_P0004773 | NR_038863      | LOC285758   | uncharacterized LOC285758                                  |                 | -0,517584874 |
| A_33_P3415211 | NM_002437      | MPV17       | MpV17 mitochondrial inner membrane protein                 | ENST00000426513 | -0,517599305 |
| A_23_P51548   | NM_004528      | MGST3       | microsomal glutathione S-transferase 3                     | ENST00000367886 | -0,517604731 |
| A_23_P29638   | NM_184231      | NCKIPSD     | NCK interacting protein with SH3 domain                    | ENST00000294129 | -0,517612036 |
| A_33_P3397693 | NM_003659      | AGPS        | alkylglycerone phosphate synthase                          | ENST00000264167 | -0,517634126 |
| A_23_P115824  | NM_012207      | HNRNPH3     | heterogeneous nuclear ribonucleoprotein H3 (2H9)           | ENST00000265866 | -0,517710141 |
| A_23_P100441  | NM_024946      | FAM192A     | family with sequence similarity 192, member A              | ENST00000309137 | -0,51773113  |
| A_23_P202837  | NM_053056      | CCND1       | cyclin D1                                                  | ENST00000227507 | -0,517754741 |
| A_23_P212617  | NM_003234      | TFRC        | transferrin receptor (p90, CD71)                           | ENST00000392396 | -0,517755611 |
| A_33_P3412900 | NM_001039771   | CBLN3       | cerebellin 3 precursor                                     | ENST00000267406 | -0,517764785 |
| A_23_P106389  | NM_003612      | SEMA7A      | semaphorin 7A, GPI membrane anchor (John Milton Hagen      | ENST00000543145 | -0,517809284 |
| A_33_P3333282 | NM_004112      | FGF11       | fibroblast growth factor 11                                | ENST00000293829 | -0,517875496 |
| A_23_P125829  | NM_000291      | PGK1        | phosphoglycerate kinase 1                                  | ENST00000537456 | -0,517916872 |
| A_33_P3252093 | NM_006827      | TMED10      | transmembrane emp24-like trafficking protein 10 (yeast)    | ENST00000303575 | -0,517922141 |
| A_23_P207400  | NM_007300      | BRCA1       | breast cancer 1, early onset                               | ENST00000412061 | -0,518123922 |
| A_21_P0009352 | TCONS_00025743 | XLOC_012560 |                                                            |                 | -0,51819607  |

|                |                 |                |                                                                |                 |              |
|----------------|-----------------|----------------|----------------------------------------------------------------|-----------------|--------------|
| A_23_P201596   | NM_004037       | AMPD2          | adenosine monophosphate deaminase 2                            | ENST00000528958 | -0,518208113 |
| A_23_P71300    | NM_018246       | CCDC25         | coiled-coil domain containing 25                               | ENST00000356537 | -0,518215082 |
| A_19_P00804215 | NM_001145710    | LOC375190      | UPF0638 protein B                                              | ENST00000420135 | -0,518227977 |
| A_23_P212617   | NM_003234       | TFRC           | transferrin receptor (p90, CD71)                               | ENST00000392396 | -0,518265163 |
| A_24_P322847   | NM_138338       | POLR3H         | polymerase (RNA) III (DNA directed) polypeptide H (22.9kD)     | ENST00000355209 | -0,518292654 |
| A_23_P1615     | NM_004214       | FIBP           | fibroblast growth factor (acidic) intracellular binding protei | ENST00000426652 | -0,518306956 |
| A_23_P147431   | NM_002350       | LYN            | v-yes-1 Yamaguchi sarcoma viral related oncogene homolog       | ENST00000519728 | -0,518358569 |
| A_32_P130788   | NM_001010971    | SAMD13         | sterile alpha motif domain containing 13                       | ENST00000370673 | -0,518398905 |
| A_23_P360797   | NM_002527       | NTF3           | neurotrophin 3                                                 | ENST00000331010 | -0,518413676 |
| A_23_P147431   | NM_002350       | LYN            | v-yes-1 Yamaguchi sarcoma viral related oncogene homolog       | ENST00000519728 | -0,518494255 |
| A_21_P0014530  | ENST00000554614 | LOC100287558   |                                                                | ENST00000554614 | -0,518520087 |
| A_23_P334608   | NM_000181       | GUSB           | glucuronidase, beta                                            | ENST00000345660 | -0,518578101 |
| A_23_P115356   | NM_003689       | AKR7A2         | aldo-keto reductase family 7, member A2 (aflatoxin aldehyc     | ENST00000235835 | -0,518626942 |
| A_23_P21363    | NM_024060       | AHNAK          | AHNAK nucleoprotein                                            | ENST00000257247 | -0,518713824 |
| A_23_P120931   | NM_014508       | APOBEC3C       | apolipoprotein B mRNA editing enzyme, catalytic polypepti      | ENST00000361441 | -0,518718921 |
| A_23_P305245   | NM_001168214    | C3orf80        | chromosome 3 open reading frame 80                             | ENST00000326474 | -0,518730205 |
| A_33_P3489646  | NM_001080547    | SPI1           | spleen focus forming virus (SFFV) proviral integration oncog   | ENST00000227163 | -0,518760372 |
| A_24_P144784   | NR_024193       | HILS1          | histone linker H1 domain, spermatid-specific 1                 | ENST00000504307 | -0,51877702  |
| A_23_P106874   | NM_031293       | PMFBP1         | polyamine modulated factor 1 binding protein 1                 | ENST00000379073 | -0,518877146 |
| A_33_P3405606  | NR_024393       | LOC727677      | uncharacterized LOC727677                                      |                 | -0,518878249 |
| A_21_P0009904  | ENST00000428999 | XLOC_013772    |                                                                | ENST00000428999 | -0,519024162 |
| A_23_P147431   | NM_002350       | LYN            | v-yes-1 Yamaguchi sarcoma viral related oncogene homolog       | ENST00000519728 | -0,519172387 |
| A_23_P256205   | NM_014945       | ABLIM3         | actin binding LIM protein family, member 3                     | ENST00000536903 | -0,519202606 |
| A_23_P204736   | NM_005276       | GPD1           | glycerol-3-phosphate dehydrogenase 1 (soluble)                 | ENST00000301149 | -0,519212948 |
| A_23_P334608   | NM_000181       | GUSB           | glucuronidase, beta                                            | ENST00000345660 | -0,519241019 |
| A_21_P0012812  | AK125257        | XLOC_I2_011361 |                                                                |                 | -0,519333198 |
| A_23_P106389   | NM_003612       | SEMA7A         | semaphorin 7A, GPI membrane anchor (John Milton Hagen          | ENST00000543145 | -0,519457895 |
| A_23_P58407    | NM_001076       | UGT2B15        | UDP glucuronosyltransferase 2 family, polypeptide B15          | ENST00000338206 | -0,519472598 |
| A_23_P59718    | NM_003130       | SRI            | sorcin                                                         | ENST00000265729 | -0,519518961 |

|               |                 |                |                                                         |                 |              |
|---------------|-----------------|----------------|---------------------------------------------------------|-----------------|--------------|
| A_33_P3441576 | BC036880        | SRGAP2P1       | SLIT-ROBO Rho GTPase activating protein 2 pseudogene 1  | ENST00000467419 | -0,519573183 |
| A_23_P55107   | NM_014683       | ULK2           | unc-51-like kinase 2 (C. elegans)                       | ENST00000395544 | -0,519575621 |
| A_23_P40821   | NM_032383       | HPS3           | Hermansky-Pudlak syndrome 3                             | ENST00000460822 | -0,51966664  |
| A_23_P138507  | NM_001786       | CDK1           | cyclin-dependent kinase 1                               | ENST00000448257 | -0,519686053 |
| A_32_P7015    | NM_012339       | TSPAN15        | tetraspanin 15                                          | ENST00000373290 | -0,519848669 |
| A_23_P163955  | NM_007169       | PEMT           | phosphatidylethanolamine N-methyltransferase            | ENST00000472446 | -0,519849548 |
| A_23_P102122  | NM_152862       | ARPC2          | actin related protein 2/3 complex, subunit 2, 34kDa     | ENST00000470146 | -0,519854558 |
| A_23_P126388  | NM_031286       | SH3BGRL3       | SH3 domain binding glutamic acid-rich protein like 3    | ENST00000319041 | -0,519893781 |
| A_33_P3324692 | NM_001136152    | ALG1L2         | asparagine-linked glycosylation 1-like 2                | ENST00000503500 | -0,519898788 |
| A_33_P3352782 | NM_024562       | TMCO7          | transmembrane and coiled-coil domains 7                 | ENST00000261778 | -0,519928764 |
| A_23_P118289  | NM_004765       | BCL7C          | B-cell CLL/lymphoma 7C                                  | ENST00000215115 | -0,52000133  |
| A_33_P3377151 | NM_006274       | CCL19          | chemokine (C-C motif) ligand 19                         | ENST00000378800 | -0,520018592 |
| A_23_P100441  | NM_024946       | FAM192A        | family with sequence similarity 192, member A           | ENST00000309137 | -0,520058178 |
| A_21_P0011635 | ENST00000414432 | XLOC_I2_006010 |                                                         | ENST00000414432 | -0,520060896 |
| A_23_P29655   | NM_020685       | C3orf14        | chromosome 3 open reading frame 14                      | ENST00000542214 | -0,520142596 |
| A_24_P940921  | NM_015046       | SETX           | senataxin                                               | ENST00000372169 | -0,520147937 |
| A_24_P226210  | NM_153223       | CEP120         | centrosomal protein 120kDa                              | ENST00000508138 | -0,520155265 |
| A_23_P102122  | NM_152862       | ARPC2          | actin related protein 2/3 complex, subunit 2, 34kDa     | ENST00000470146 | -0,520164124 |
| A_33_P3286046 | NM_015448       | DPCD           | deleted in primary ciliary dyskinesia homolog (mouse)   | ENST00000370149 | -0,520259627 |
| A_23_P115519  | NM_032563       | LCE3D          | late cornified envelope 3D                              | ENST00000368787 | -0,520308377 |
| A_23_P124044  | NM_021008       | DEAF1          | deformed epidermal autoregulatory factor 1 (Drosophila) | ENST00000527658 | -0,520345133 |
| A_23_P110941  | NM_001512       | GSTA4          | glutathione S-transferase alpha 4                       | ENST00000370960 | -0,520366527 |
| A_21_P0003772 | TCONS_00008581  | XLOC_004091    |                                                         |                 | -0,520380283 |
| A_33_P3438072 | NR_040039       | LOC157273      | uncharacterized LOC157273                               | ENST00000520390 | -0,520410052 |
| A_23_P80974   | NM_005651       | TDO2           | tryptophan 2,3-dioxygenase                              | ENST00000510293 | -0,52042431  |
| A_23_P212617  | NM_003234       | TFRC           | transferrin receptor (p90, CD71)                        | ENST00000392396 | -0,520659109 |
| A_23_P203558  | NM_000518       | HBB            | hemoglobin, beta                                        | ENST00000335295 | -0,52071102  |
| A_24_P134834  | NM_032276       | RHBDD1         | rhomboid domain containing 1                            | ENST00000392062 | -0,520742267 |
| A_23_P134454  | NM_001753       | CAV1           | caveolin 1, caveolae protein, 22kDa                     | ENST00000341049 | -0,520767423 |



|               |                |                |                                                             |                 |              |
|---------------|----------------|----------------|-------------------------------------------------------------|-----------------|--------------|
| A_21_P0010618 | BX113442       | XLOC_I2_000941 |                                                             |                 | -0,520773855 |
| A_23_P317683  | NM_003274      | TRAPPC10       | trafficking protein particle complex 10                     | ENST00000291574 | -0,520791084 |
| A_23_P115356  | NM_003689      | AKR7A2         | aldo-keto reductase family 7, member A2 (aflatoxin aldehyde | ENST00000235835 | -0,520825543 |
| A_23_P392942  | NM_002445      | MSR1           | macrophage scavenger receptor 1                             | ENST00000381998 | -0,520868375 |
| A_24_P279797  | NM_001031727   | MRI1           | methylthioribose-1-phosphate isomerase homolog (S. cerev    | ENST00000040663 | -0,520900746 |
| A_33_P3394933 | NM_001017973   | P4HA2          | prolyl 4-hydroxylase, alpha polypeptide II                  | ENST00000395164 | -0,520939748 |
| A_24_P97405   | NM_003965      | CCRL2          | chemokine (C-C motif) receptor-like 2                       | ENST00000400880 | -0,521013171 |
| A_24_P75157   | NM_004610      | TCP10          | t-complex 10 homolog (mouse)                                | ENST00000464222 | -0,521070749 |
| A_24_P287941  | NM_013290      | PSMC3IP        | PSMC3 interacting protein                                   | ENST00000393795 | -0,521133811 |
| A_23_P105535  | NM_172240      | POC1B          | POC1 centriolar protein homolog B (Chlamydomonas)           | ENST00000378528 | -0,52124536  |
| A_33_P3313110 | NM_024690      | MUC16          | mucin 16, cell surface associated                           | ENST00000397910 | -0,521297323 |
| A_23_P147431  | NM_002350      | LYN            | v-yes-1 Yamaguchi sarcoma viral related oncogene homolog    | ENST00000519728 | -0,52137539  |
| A_33_P3267208 | NM_022048      | CSNK1G1        | casein kinase 1, gamma 1                                    | ENST00000303052 | -0,521385916 |
| A_23_P103070  | NM_003405      | YWHAH          | tyrosine 3-monooxygenase/tryptophan 5-monooxygenase a       | ENST00000248975 | -0,521388777 |
| A_21_P0007697 | TCONS_00020752 | XLOC_010040    |                                                             |                 | -0,52159829  |
| A_21_P0001444 | TCONS_00001347 | XLOC_000638    |                                                             |                 | -0,521625836 |
| A_33_P3331346 | NM_173547      | TRIM65         | tripartite motif containing 65                              | ENST00000269383 | -0,521637641 |
| A_23_P125829  | NM_000291      | PGK1           | phosphoglycerate kinase 1                                   | ENST00000537456 | -0,521666081 |
| A_33_P3312642 | NM_001122716   | CXorf64        | chromosome X open reading frame 64                          | ENST00000371125 | -0,521696384 |
| A_23_P101084  | NM_032598      | SPATA22        | spermatogenesis associated 22                               | ENST00000541913 | -0,521726995 |
| A_24_P74371   | NM_000308      | CTSA           | cathepsin A                                                 | ENST00000354880 | -0,52175676  |
| A_23_P102471  | NM_000251      | MSH2           | mutS homolog 2, colon cancer, nonpolyposis type 1 (E. coli) | ENST00000543555 | -0,521782896 |
| A_23_P124837  | NM_002332      | LRP1           | low density lipoprotein receptor-related protein 1          | ENST00000556356 | -0,521810972 |
| A_23_P132910  | NM_019027      | RBM47          | RNA binding motif protein 47                                | ENST00000510871 | -0,521844917 |
| A_23_P166408  | NM_020530      | OSM            | oncostatin M                                                | ENST00000215781 | -0,521862677 |
| A_23_P88904   | NM_002528      | NTHL1          | nth endonuclease III-like 1 (E. coli)                       | ENST00000219066 | -0,521916093 |
| A_23_P217269  | NM_007268      | VSIG4          | V-set and immunoglobulin domain containing 4                | ENST00000412866 | -0,521946573 |
| A_23_P210886  | NM_138578      | BCL2L1         | BCL2-like 1                                                 | ENST00000420653 | -0,522022371 |
| A_21_P0005203 | XR_108720      | LOC100507642   | uncharacterized LOC100507642                                |                 | -0,522063216 |

|                |                 |              |                                                              |                 |              |
|----------------|-----------------|--------------|--------------------------------------------------------------|-----------------|--------------|
| A_23_P114095   | NM_015884       | MBTPS2       | membrane-bound transcription factor peptidase, site 2        | ENST00000379484 | -0,522171655 |
| A_32_P206839   | NR_037631       | LOC100288911 | uncharacterized LOC100288911                                 |                 | -0,522185686 |
| A_33_P3383189  | NM_001145250    | SP9          | Sp9 transcription factor homolog (mouse)                     | ENST00000394967 | -0,52220767  |
| A_21_P0012106  | NR_037195       | LOC646324    | uncharacterized LOC646324                                    | ENST00000413563 | -0,522217657 |
| A_23_P124837   | NM_002332       | LRP1         | low density lipoprotein receptor-related protein 1           | ENST00000556356 | -0,52227186  |
| A_33_P3225685  | NM_012200       | B3GAT3       | beta-1,3-glucuronyltransferase 3 (glucuronosyltransferase I  | ENST00000265471 | -0,522282957 |
| A_19_P00800681 | XR_110300       | LOC100506965 | uncharacterized LOC100506965                                 |                 | -0,522328204 |
| A_23_P3371     | NM_002891       | RASGRF1      | Ras protein-specific guanine nucleotide-releasing factor 1   | ENST00000394741 | -0,522466726 |
| A_23_P40821    | NM_032383       | HPS3         | Hermansky-Pudlak syndrome 3                                  | ENST00000460822 | -0,522564965 |
| A_33_P3397399  | ENST00000394822 | PPP3CB       | protein phosphatase 3, catalytic subunit, beta isozyme       | ENST00000394822 | -0,522597831 |
| A_32_P226078   | NM_016178       | OAZ3         | ornithine decarboxylase antizyme 3                           | ENST00000400999 | -0,522636876 |
| A_23_P55174    | NM_138387       | G6PC3        | glucose 6 phosphatase, catalytic, 3                          | ENST00000269097 | -0,522758743 |
| A_23_P147431   | NM_002350       | LYN          | v-yes-1 Yamaguchi sarcoma viral related oncogene homolog     | ENST00000519728 | -0,522781677 |
| A_33_P3223592  | NM_000041       | APOE         | apolipoprotein E                                             | ENST00000252486 | -0,522788553 |
| A_33_P3230881  | NM_032834       | ALG10        | asparagine-linked glycosylation 10, alpha-1,2-glucosyltransf | ENST00000308742 | -0,522849825 |
| A_23_P138507   | NM_001786       | CDK1         | cyclin-dependent kinase 1                                    | ENST00000448257 | -0,522915036 |
| A_23_P113351   | NM_004684       | SPARCL1      | SPARC-like 1 (hevin)                                         | ENST00000418378 | -0,522940236 |
| A_32_P473302   | NR_015375       | FLJ35024     | uncharacterized LOC401491                                    |                 | -0,522986716 |
| A_21_P0000861  | NR_038983       | LOC100506134 | uncharacterized LOC100506134                                 | ENST00000440322 | -0,523077801 |
| A_23_P104651   | NM_080668       | CDCA5        | cell division cycle associated 5                             | ENST00000275517 | -0,523127825 |
| A_23_P17481    | NM_023068       | SIGLEC1      | sialic acid binding Ig-like lectin 1, sialoadhesin           | ENST00000202578 | -0,523168682 |
| A_33_P3409062  | NM_003332       | TYROBP       | TYRO protein tyrosine kinase binding protein                 | ENST00000262629 | -0,52341481  |
| A_23_P102122   | NM_152862       | ARPC2        | actin related protein 2/3 complex, subunit 2, 34kDa          | ENST00000470146 | -0,523507432 |
| A_23_P10497    | NM_198531       | ATP9B        | ATPase, class II, type 9B                                    | ENST00000543761 | -0,523581031 |
| A_23_P146233   | NM_000237       | LPL          | lipoprotein lipase                                           | ENST00000311322 | -0,523599855 |
| A_23_P201655   | NM_012333       | MYCBP        | c-myc binding protein                                        | ENST00000465771 | -0,523610342 |
| A_23_P10497    | NM_198531       | ATP9B        | ATPase, class II, type 9B                                    | ENST00000543761 | -0,523662446 |
| A_24_P309415   | NM_052932       | TMEM123      | transmembrane protein 123                                    | ENST00000398136 | -0,523730819 |
| A_23_P207106   | NM_000747       | CHRNB1       | cholinergic receptor, nicotinic, beta 1 (muscle)             | ENST00000306071 | -0,523731159 |

|               |                  |                |                                                            |                 |              |
|---------------|------------------|----------------|------------------------------------------------------------|-----------------|--------------|
| A_33_P3233550 | NM_020532        | RTN4           | reticulon 4                                                | ENST00000354474 | -0,523779481 |
| A_23_P154605  | NM_018837        | SULF2          | sulfatase 2                                                | ENST00000467815 | -0,524022091 |
| A_23_P102122  | NM_152862        | ARPC2          | actin related protein 2/3 complex, subunit 2, 34kDa        | ENST00000470146 | -0,52403758  |
| A_24_P240065  | NM_016079        | CHMP3          | charged multivesicular body protein 3                      | ENST00000409810 | -0,524046558 |
| A_33_P3363560 | NM_001136216     | TMEM51         | transmembrane protein 51                                   | ENST00000376014 | -0,524104779 |
| A_33_P3306068 | NM_001033081     | MYCL1          | v-myc myelocytomatosis viral oncogene homolog 1, lung ca   | ENST00000397332 | -0,524113957 |
| A_23_P115872  | NM_018131        | CEP55          | centrosomal protein 55kDa                                  | ENST00000371485 | -0,524157013 |
| A_23_P115356  | NM_003689        | AKR7A2         | aldo-keto reductase family 7, member A2 (aflatoxin aldehyc | ENST00000235835 | -0,52426273  |
| A_21_P0001878 | ENST00000449073  | XLOC_001525    |                                                            | ENST00000449073 | -0,524288145 |
| A_21_P0013583 | TCONS_I2_0002881 | XLOC_I2_014830 |                                                            |                 | -0,524575423 |
| A_23_P415652  | NM_024642        | GALNT12        | UDP-N-acetyl-alpha-D-galactosamine:polypeptide N-acetylgl  | ENST00000375011 | -0,524797896 |
| A_24_P296254  | NM_014783        | ARHGAP11A      | Rho GTPase activating protein 11A                          | ENST00000361627 | -0,524868546 |
| A_23_P44942   | NM_025004        | CCDC15         | coiled-coil domain containing 15                           | ENST00000531167 | -0,524884712 |
| A_33_P3262789 | NM_138393        | REEP6          | receptor accessory protein 6                               | ENST00000233596 | -0,52489419  |
| A_23_P157784  | NM_032593        | HINT2          | histidine triad nucleotide binding protein 2               | ENST00000474848 | -0,524895759 |
| A_23_P102122  | NM_152862        | ARPC2          | actin related protein 2/3 complex, subunit 2, 34kDa        | ENST00000470146 | -0,524940856 |
| A_33_P3276019 | ENST00000399143  | DCDC2C         | doublecortin domain containing 2C                          | ENST00000399143 | -0,525058603 |
| A_23_P60387   | NM_017617        | NOTCH1         | notch 1                                                    | ENST00000277541 | -0,525090613 |
| A_23_P120860  | NM_003634        | NIPSNAP1       | nipsnap homolog 1 (C. elegans)                             | ENST00000216121 | -0,525092116 |
| A_23_P108751  | NM_001039492     | FHL2           | four and a half LIM domains 2                              | ENST00000358129 | -0,525107091 |
| A_33_P3215913 | ENST00000403210  | TMEM184B       | transmembrane protein 184B                                 | ENST00000403210 | -0,52510737  |
| A_33_P3374210 | NM_002417        | MKI67          | antigen identified by monoclonal antibody Ki-67            | ENST00000368652 | -0,52511907  |
| A_21_P0001844 | ENST00000419013  | XLOC_001392    |                                                            | ENST00000419013 | -0,525189616 |
| A_23_P112004  | NM_012472        | LRRC6          | leucine rich repeat containing 6                           | ENST00000395414 | -0,525299506 |
| A_21_P0003581 | TCONS_00008003   | XLOC_003469    |                                                            |                 | -0,52529954  |
| A_24_P176714  | NM_015681        | B9D1           | B9 protein domain 1                                        | ENST00000477478 | -0,525588705 |
| A_23_P122796  | NM_016063        | HDDC2          | HD domain containing 2                                     | ENST00000398153 | -0,525613661 |
| A_23_P138507  | NM_001786        | CDK1           | cyclin-dependent kinase 1                                  | ENST00000448257 | -0,525693441 |
| A_23_P66948   | NM_022751        | FAM59A         | family with sequence similarity 59, member A               | ENST00000269209 | -0,525751601 |

|               |                 |             |                                                                            |                 |              |
|---------------|-----------------|-------------|----------------------------------------------------------------------------|-----------------|--------------|
| A_23_P95029   | NM_021021       | SNTB1       | syntrophin, beta 1 (dystrophin-associated protein A1, 59kD:ENST00000395601 | ENST00000395601 | -0,525772487 |
| A_24_P259276  | NM_207340       | ZDHC24      | zinc finger, DHHC-type containing 24                                       | ENST00000310442 | -0,525900064 |
| A_23_P95790   | NM_017625       | ITLN1       | intelectin 1 (galactofuranose binding)                                     | ENST00000326245 | -0,525966167 |
| A_33_P3284463 | NM_177924       | ASAH1       | N-acylsphingosine amidohydrolase (acid ceramidase) 1                       | ENST00000417108 | -0,525993204 |
| A_23_P147431  | NM_002350       | LYN         | v-yes-1 Yamaguchi sarcoma viral related oncogene homolog                   | ENST00000519728 | -0,526026173 |
| A_23_P116829  | NM_003348       | UBE2N       | ubiquitin-conjugating enzyme E2N                                           | ENST00000318066 | -0,526054159 |
| A_23_P37144   | NM_080664       | C14orf126   | chromosome 14 open reading frame 126                                       | ENST00000310850 | -0,526087553 |
| A_33_P3388331 | NM_005766       | FARP1       | FERM, RhoGEF (ARHGEF) and pleckstrin domain protein 1 (c                   | ENST00000376584 | -0,526214831 |
| A_33_P3263497 | ENST00000401884 | SNED1       | sushi, nidogen and EGF-like domains 1                                      | ENST00000401884 | -0,526245048 |
| A_23_P63789   | NM_032997       | ZWINT       | ZW10 interactor                                                            | ENST00000318387 | -0,526380443 |
| A_21_P0004136 | ENST00000515199 | XLOC_004859 |                                                                            | ENST00000515199 | -0,526420856 |
| A_33_P3318288 | NM_001014975    | CFH         | complement factor H                                                        | ENST00000391986 | -0,526515428 |
| A_23_P75283   | NM_006744       | RBP4        | retinol binding protein 4, plasma                                          | ENST00000471469 | -0,52659454  |
| A_33_P3253528 | NM_004275       | MED20       | mediator complex subunit 20                                                | ENST00000409312 | -0,526639845 |
| A_33_P3418766 | NM_018181       | ZNF532      | zinc finger protein 532                                                    | ENST00000336078 | -0,526655399 |
| A_21_P0006575 | TCONS_00017488  | XLOC_008116 |                                                                            |                 | -0,526775484 |
| A_32_P55860   | NM_182620       | SKA2        | spindle and kinetochore associated complex subunit 2                       | ENST00000330137 | -0,526787252 |
| A_23_P168211  | NM_030796       | VOPP1       | vesicular, overexpressed in cancer, prosurvival protein 1                  | ENST00000545390 | -0,526799174 |
| A_23_P417014  | NM_001010877    | ZNF311      | zinc finger protein 311                                                    | ENST00000452316 | -0,526890474 |
| A_24_P46093   | NM_003043       | SLC6A6      | solute carrier family 6 (neurotransmitter transporter, taurin              | ENST00000360861 | -0,526899284 |
| A_33_P3295253 | NM_198271       | LMOD3       | leiomodlin 3 (fetal)                                                       | ENST00000475434 | -0,526968139 |
| A_21_P0008436 | ENST00000556130 | XLOC_011017 |                                                                            | ENST00000556130 | -0,526985478 |
| A_23_P37514   | NM_015492       | C15orf39    | chromosome 15 open reading frame 39                                        | ENST00000360639 | -0,527043259 |
| A_33_P3392867 | NM_006239       | PPEF2       | protein phosphatase, EF-hand calcium binding domain 2                      | ENST00000337500 | -0,527067683 |
| A_23_P10497   | NM_198531       | ATP9B       | ATPase, class II, type 9B                                                  | ENST00000543761 | -0,527255913 |
| A_23_P60387   | NM_017617       | NOTCH1      | notch 1                                                                    | ENST00000277541 | -0,527294296 |
| A_23_P132057  | NR_024027       | LINC00158   | long intergenic non-protein coding RNA 158                                 |                 | -0,527311204 |
| A_23_P256855  | NM_020750       | XPO5        | exportin 5                                                                 | ENST00000455854 | -0,527325287 |
| A_24_P228875  | NM_004840       | ARHGEF6     | Rac/Cdc42 guanine nucleotide exchange factor (GEF) 6                       | ENST00000535736 | -0,527336178 |

|               |                  |                |                                                             |                 |              |
|---------------|------------------|----------------|-------------------------------------------------------------|-----------------|--------------|
| A_24_P17722   | NM_198868        | TBC1D9B        | TBC1 domain family, member 9B (with GRAM domain)            | ENST00000520794 | -0,527378807 |
| A_33_P3260430 | NM_005988        | SPRR2A         | small proline-rich protein 2A                               | ENST00000392653 | -0,527389093 |
| A_23_P70213   | NM_000038        | APC            | adenomatous polyposis coli                                  | ENST00000508376 | -0,527435625 |
| A_23_P123071  | NM_001233        | CAV2           | caveolin 2                                                  | ENST00000498493 | -0,52747225  |
| A_21_P0006412 | ENST00000454113  | XLOC_007928    |                                                             | ENST00000454113 | -0,527571477 |
| A_23_P213102  | NM_016081        | PALLD          | palladin, cytoskeletal associated protein                   | ENST00000507699 | -0,52757243  |
| A_23_P45011   | NM_030949        | PPP1R14C       | protein phosphatase 1, regulatory (inhibitor) subunit 14C   | ENST00000361131 | -0,527577418 |
| A_32_P98683   | NM_005937        | MLLT6          | myeloid/lymphoid or mixed-lineage leukemia (trithorax hor   | ENST00000325718 | -0,527599542 |
| A_24_P203226  | NM_178230        | PPIAL4A        | peptidylprolyl isomerase A (cyclophilin A)-like 4A          | ENST00000369222 | -0,527608597 |
| A_32_P131640  | NM_173078        | SLITRK4        | SLIT and NTRK-like family, member 4                         | ENST00000338017 | -0,527723355 |
| A_23_P124486  | NM_002833        | PTPN9          | protein tyrosine phosphatase, non-receptor type 9           | ENST00000544966 | -0,527776308 |
| A_23_P71148   | NM_000712        | BLVRA          | biliverdin reductase A                                      | ENST00000265523 | -0,527845555 |
| A_23_P212617  | NM_003234        | TFRC           | transferrin receptor (p90, CD71)                            | ENST00000392396 | -0,527881521 |
| A_21_P0011194 | TCONS_I2_0000734 | XLOC_I2_004115 |                                                             |                 | -0,527884459 |
| A_32_P118586  | NM_152678        | FAM116A        | family with sequence similarity 116, member A               | ENST00000311128 | -0,527932864 |
| A_33_P3406636 | NM_152283        | ZFP62          | zinc finger protein 62 homolog (mouse)                      | ENST00000359141 | -0,528021569 |
| A_23_P125829  | NM_000291        | PGK1           | phosphoglycerate kinase 1                                   | ENST00000537456 | -0,528092976 |
| A_23_P363406  | NM_015305        | ANGEL1         | angel homolog 1 (Drosophila)                                | ENST00000251089 | -0,528218947 |
| A_33_P3287502 | NM_000251        | MSH2           | mutS homolog 2, colon cancer, nonpolyposis type 1 (E. coli) | ENST00000419559 | -0,528264662 |
| A_33_P3264875 | NM_001004105     | GRK6           | G protein-coupled receptor kinase 6                         | ENST00000355958 | -0,528273314 |
| A_21_P0000641 | NR_034125        | LOC387723      | uncharacterized LOC387723                                   |                 | -0,52830444  |
| A_23_P12082   | NM_001025199     | CHI3L2         | chitinase 3-like 2                                          | ENST00000369748 | -0,528310755 |
| A_33_P3303449 | NM_001198688     | LEPR           | leptin receptor                                             | ENST00000344610 | -0,528437403 |
| A_23_P103877  | NM_001010847     | LRRC38         | leucine rich repeat containing 38                           | ENST00000376085 | -0,528484101 |
| A_24_P558365  | NM_001105281     | FABP12         | fatty acid binding protein 12                               | ENST00000360464 | -0,528512856 |
| A_21_P0014090 | XR_108406        | LOC100506892   | uncharacterized LOC100506892                                |                 | -0,528625449 |
| A_23_P502312  | NM_078481        | CD97           | CD97 molecule                                               | ENST00000242786 | -0,528644941 |
| A_21_P0012213 | NR_027072        | LINC00189      | long intergenic non-protein coding RNA 189                  | ENST00000545936 | -0,528694854 |
| A_33_P3334108 | NM_001004304     | ZNF740         | zinc finger protein 740                                     |                 | -0,528704204 |



|               |              |             |                                                             |                 |              |
|---------------|--------------|-------------|-------------------------------------------------------------|-----------------|--------------|
| A_21_P0007430 | BC013074     | XLOC_009080 |                                                             | ENST00000527059 | -0,528749265 |
| A_21_P0006549 | THC2697511   | XLOC_008233 |                                                             |                 | -0,528762074 |
| A_23_P209055  | NM_001771    | CD22        | CD22 molecule                                               | ENST00000419549 | -0,528836569 |
| A_24_P19752   | NM_002857    | PEX19       | peroxisomal biogenesis factor 19                            | ENST00000472750 | -0,528905997 |
| A_33_P3344451 | NM_032366    | C16orf13    | chromosome 16 open reading frame 13                         | ENST00000301686 | -0,528930667 |
| A_23_P158725  | NM_001042422 | SLC16A3     | solute carrier family 16, member 3 (monocarboxylic acid tra | ENST00000392341 | -0,529011189 |
| A_23_P425516  | NM_012171    | TSPAN17     | tetraspanin 17                                              | ENST00000310032 | -0,529153596 |
| A_24_P132383  | NM_175571    | GIMAP8      | GTPase, IMAP family member 8                                | ENST00000307271 | -0,529174856 |
| A_23_P67785   | NM_001025436 | SPAG16      | sperm associated antigen 16                                 | ENST00000420497 | -0,529239979 |
| A_23_P106874  | NM_031293    | PMFBP1      | polyamine modulated factor 1 binding protein 1              | ENST00000379073 | -0,529243698 |
| A_23_P67414   | NM_030785    | RSPH6A      | radial spoke head 6 homolog A (Chlamydomonas)               | ENST00000221538 | -0,529252218 |
| A_24_P166311  | NM_022090    | C5orf54     | chromosome 5 open reading frame 54                          | ENST00000523213 | -0,529363853 |
| A_23_P115645  | NM_001025076 | CELF2       | CUGBP, Elav-like family member 2                            | ENST00000537122 | -0,529487418 |
| A_24_P74571   | NM_001002880 | CBY1        | chibby homolog 1 (Drosophila)                               | ENST00000489847 | -0,529509835 |
| A_23_P115872  | NM_018131    | CEP55       | centrosomal protein 55kDa                                   | ENST00000371485 | -0,529572991 |
| A_23_P122863  | NM_001001555 | GRB10       | growth factor receptor-bound protein 10                     | ENST00000402497 | -0,529590447 |
| A_24_P254551  | NM_015185    | ARHGEF9     | Cdc42 guanine nucleotide exchange factor (GEF) 9            | ENST00000374870 | -0,529645153 |
| A_23_P143817  | NM_053025    | MYLK        | myosin light chain kinase                                   | ENST00000475616 | -0,529670408 |
| A_23_P162746  | NM_015974    | CRYL1       | crystallin, lambda 1                                        | ENST00000298248 | -0,529693165 |
| A_33_P3211956 | NM_005873    | RGS19       | regulator of G-protein signaling 19                         | ENST00000395042 | -0,529775686 |
| A_33_P3209866 | NM_153186    | KANK1       | KN motif and ankyrin repeat domains 1                       | ENST00000382289 | -0,529786945 |
| A_33_P3307157 | NM_001134363 | RBM20       | RNA binding motif protein 20                                | ENST00000369519 | -0,529845103 |
| A_23_P124837  | NM_002332    | LRP1        | low density lipoprotein receptor-related protein 1          | ENST00000556356 | -0,529846618 |
| A_23_P10506   | NM_014485    | HPGDS       | hematopoietic prostaglandin D synthase                      | ENST00000295256 | -0,529984046 |
| A_23_P88381   | NM_001005743 | NUMB        | numb homolog (Drosophila)                                   | ENST00000555394 | -0,530006552 |
| A_24_P89457   | NM_078467    | CDKN1A      | cyclin-dependent kinase inhibitor 1A (p21, Cip1)            | ENST00000478800 | -0,53001897  |
| A_24_P36944   | NM_014812    | CEP170      | centrosomal protein 170kDa                                  | ENST00000439296 | -0,530032036 |
| A_23_P212617  | NM_003234    | TFRC        | transferrin receptor (p90, CD71)                            | ENST00000392396 | -0,530079832 |
| A_23_P77328   | NM_005258    | GCHFR       | GTP cyclohydrolase I feedback regulator                     | ENST00000260447 | -0,530109157 |

|               |                 |                |                                                              |  |                 |              |
|---------------|-----------------|----------------|--------------------------------------------------------------|--|-----------------|--------------|
| A_21_P0009558 | TCONS_00026523  | XLOC_012847    |                                                              |  |                 | -0,530272603 |
| A_33_P3362321 | NM_201555       | FHL2           | four and a half LIM domains 2                                |  | ENST00000452732 | -0,530297861 |
| A_23_P131375  | NM_152391       | PQLC3          | PQ loop repeat containing 3                                  |  | ENST00000295083 | -0,530383091 |
| A_23_P113393  | NM_017413       | APLN           | apelin                                                       |  | ENST00000307484 | -0,530502873 |
| A_23_P120860  | NM_003634       | NIPSNAP1       | nipsnap homolog 1 (C. elegans)                               |  | ENST00000216121 | -0,53050288  |
| A_23_P122077  | NM_016591       | GCNT4          | glucosaminyl (N-acetyl) transferase 4, core 2                |  | ENST00000322348 | -0,530544496 |
| A_23_P103070  | NM_003405       | YWHAH          | tyrosine 3-monooxygenase/tryptophan 5-monooxygenase $\alpha$ |  | ENST00000248975 | -0,530742478 |
| A_21_P0005426 | TCONS_00013583  | XLOC_006235    |                                                              |  |                 | -0,530759094 |
| A_23_P256172  | NM_199069       | NDUFAF3        | NADH dehydrogenase (ubiquinone) 1 alpha subcomplex, as       |  | ENST00000496152 | -0,530779646 |
| A_21_P0013932 | XM_002342722    | LOC100289196   | chromosome 7 open reading frame 73 pseudogene                |  |                 | -0,530804517 |
| A_23_P33723   | NM_004244       | CD163          | CD163 molecule                                               |  | ENST00000396620 | -0,530825227 |
| A_23_P103398  | NM_000447       | PSEN2          | presenilin 2 (Alzheimer disease 4)                           |  | ENST00000366783 | -0,530825454 |
| A_24_P324314  | NM_001008529    | MXRA7          | matrix-remodelling associated 7                              |  | ENST00000375036 | -0,530851631 |
| A_21_P0010772 | ENST00000427309 | XLOC_I2_001089 |                                                              |  | ENST00000427309 | -0,530869553 |
| A_23_P151870  | NM_015554       | GLCE           | glucuronic acid epimerase                                    |  | ENST00000261858 | -0,530899988 |
| A_23_P254733  | NM_024629       | MLF1IP         | MLF1 interacting protein                                     |  | ENST00000502461 | -0,530994032 |
| A_33_P3402454 | NM_138612       | HAS3           | hyaluronan synthase 3                                        |  | ENST00000219322 | -0,53100038  |
| A_23_P147431  | NM_002350       | LYN            | v-yes-1 Yamaguchi sarcoma viral related oncogene homolog     |  | ENST00000519728 | -0,531016351 |
| A_23_P43425   | NM_017998       | C9orf40        | chromosome 9 open reading frame 40                           |  | ENST00000376854 | -0,531053879 |
| A_23_P102471  | NM_000251       | MSH2           | mutS homolog 2, colon cancer, nonpolyposis type 1 (E. coli)  |  | ENST00000543555 | -0,531092715 |
| A_24_P162979  | NM_024933       | ANKRD53        | ankyrin repeat domain 53                                     |  | ENST00000272421 | -0,531092741 |
| A_23_P115726  | NM_194298       | SLC16A9        | solute carrier family 16, member 9 (monocarboxylic acid tra  |  | ENST00000395348 | -0,531096335 |
| A_21_P0002261 | TCONS_00003800  | XLOC_001595    |                                                              |  |                 | -0,531193281 |
| A_24_P321626  | NM_018082       | POLR3B         | polymerase (RNA) III (DNA directed) polypeptide B            |  | ENST00000228347 | -0,531207111 |
| A_33_P3259440 | NM_001038640    | GOLGA6A        | golgin A6 family, member A                                   |  | ENST00000290438 | -0,531264224 |
| A_24_P10657   | NM_020428       | SLC44A2        | solute carrier family 44, member 2                           |  | ENST00000335757 | -0,531270307 |
| A_23_P104996  | NM_004183       | BEST1          | bestrophin 1                                                 |  | ENST00000524877 | -0,531346739 |
| A_23_P101623  | NM_022103       | ZNF667         | zinc finger protein 667                                      |  | ENST00000360227 | -0,531367795 |
| A_23_P113748  | NM_024697       | ZNF385D        | zinc finger protein 385D                                     |  | ENST00000494118 | -0,531384447 |

|                |                  |                |                                                             |                 |              |
|----------------|------------------|----------------|-------------------------------------------------------------|-----------------|--------------|
| A_33_P3330608  | NM_032152        | PRAM1          | PML-RARA regulated adaptor molecule 1                       | ENST00000255612 | -0,531453986 |
| A_21_P0004980  | ENST00000453935  | XLOC_005566    |                                                             | ENST00000453935 | -0,531525504 |
| A_21_P0009581  | THC2697570       | XLOC_012884    |                                                             |                 | -0,531569759 |
| A_33_P3341586  | NM_001037633     | SIL1           | SIL1 homolog, endoplasmic reticulum chaperone (S. cerevis)  | ENST00000394817 | -0,531629339 |
| A_24_P72394    | NM_021163        | RBAK           | RB-associated KRAB zinc finger                              | ENST00000353796 | -0,531867284 |
| A_24_P305764   | NM_004595        | SMS            | spermine synthase                                           | ENST00000379404 | -0,531903077 |
| A_24_P286054   | NM_001105251     | ZFYVE16        | zinc finger, FYVE domain containing 16                      | ENST00000512907 | -0,53192955  |
| A_23_P109171   | NM_001195        | BFSP1          | beaded filament structural protein 1, filensin              | ENST00000536626 | -0,532168476 |
| A_21_P0004130  | ENST00000431789  | XLOC_004832    |                                                             | ENST00000431789 | -0,532183477 |
| A_24_P125561   | NM_014441        | SIGLEC9        | sialic acid binding Ig-like lectin 9                        | ENST00000440804 | -0,532265468 |
| A_23_P124044   | NM_021008        | DEAF1          | deformed epidermal autoregulatory factor 1 (Drosophila)     | ENST00000527658 | -0,532282644 |
| A_23_P334709   | NM_007270        | FKBP9          | FK506 binding protein 9, 63 kDa                             | ENST00000455909 | -0,53230021  |
| A_23_P82738    | NM_012415        | RAD54B         | RAD54 homolog B (S. cerevisiae)                             | ENST00000546218 | -0,532306913 |
| A_23_P83094    | NM_007005        | TLE4           | transducin-like enhancer of split 4 (E(sp1) homolog, Drosop | ENST00000376520 | -0,532308845 |
| A_33_P3240507  | NM_138444        | KCTD12         | potassium channel tetramerisation domain containing 12      | ENST00000317765 | -0,532346401 |
| A_23_P115824   | NM_012207        | HNRNPH3        | heterogeneous nuclear ribonucleoprotein H3 (2H9)            | ENST00000265866 | -0,532424669 |
| A_33_P3278659  | AB128832         | ERVH-3         | endogenous retrovirus group H, member 3                     |                 | -0,532439688 |
| A_32_P157945   | NM_004415        | DSP            | desmoplakin                                                 | ENST00000418664 | -0,532487188 |
| A_23_P218068   | NM_019012        | PLEKHA5        | pleckstrin homology domain containing, family A member 5    | ENST00000542828 | -0,532493449 |
| A_23_P104741   | NM_032531        | KIRREL3        | kin of IRRE like 3 (Drosophila)                             | ENST00000525144 | -0,532511227 |
| A_19_P00804093 | NM_173463        | CCDC149        | coiled-coil domain containing 149                           | ENST00000507096 | -0,532550191 |
| A_23_P344392   | NM_002542        | OGG1           | 8-oxoguanine DNA glycosylase                                | ENST00000432857 | -0,532612735 |
| A_23_P318284   | NM_015141        | GPD1L          | glycerol-3-phosphate dehydrogenase 1-like                   | ENST00000474846 | -0,532619575 |
| A_23_P24966    | NM_171997        | USP2           | ubiquitin specific peptidase 2                              | ENST00000525735 | -0,53271078  |
| A_23_P104025   | NM_052965        | TSEN15         | tRNA splicing endonuclease 15 homolog (S. cerevisiae)       | ENST00000462677 | -0,532787616 |
| A_23_P39955    | NM_001615        | ACTG2          | actin, gamma 2, smooth muscle, enteric                      | ENST00000438902 | -0,532876762 |
| A_21_P0013202  | TCONS_I2_0002590 | XLOC_I2_013425 |                                                             |                 | -0,532959053 |
| A_23_P10497    | NM_198531        | ATP9B          | ATPase, class II, type 9B                                   | ENST00000543761 | -0,533187249 |
| A_23_P121480   | NM_001004196     | CD200          | CD200 molecule                                              | ENST00000478595 | -0,533218174 |

|               |                 |              |                                                               |                 |              |
|---------------|-----------------|--------------|---------------------------------------------------------------|-----------------|--------------|
| A_23_P8571    | NM_080744       | SRCRB4D      | scavenger receptor cysteine rich domain containing, group     | ENST00000275560 | -0,533221633 |
| A_23_P207400  | NM_007300       | BRCA1        | breast cancer 1, early onset                                  | ENST00000412061 | -0,533229007 |
| A_33_P3400192 | NM_001135044    | MAPK9        | mitogen-activated protein kinase 9                            | ENST00000425491 | -0,533234244 |
| A_33_P3251332 | NM_015473       | HEATR5A      | HEAT repeat containing 5A                                     | ENST00000389961 | -0,533252723 |
| A_23_P122976  | NM_002069       | GNAI1        | guanine nucleotide binding protein (G protein), alpha inhibi  | ENST00000351004 | -0,533266117 |
| A_23_P132956  | NM_004181       | UCHL1        | ubiquitin carboxyl-terminal esterase L1 (ubiquitin thiolester | ENST00000472501 | -0,533304745 |
| A_23_P396777  | NM_006315       | PCGF3        | polycomb group ring finger 3                                  | ENST00000362003 | -0,533419118 |
| A_23_P204246  | NM_004426       | PHC1         | polyhomeotic homolog 1 (Drosophila)                           | ENST00000251757 | -0,533442115 |
| A_33_P3303259 | NM_006437       | PARP4        | poly (ADP-ribose) polymerase family, member 4                 | ENST00000381989 | -0,533461739 |
| A_21_P0005154 | TCONS_00012648  | XLOC_005589  |                                                               |                 | -0,533537695 |
| A_33_P3331376 | NM_004442       | EPHB2        | EPH receptor B2                                               | ENST00000374632 | -0,533570237 |
| A_23_P115492  | NM_024749       | VASH2        | vasohibin 2                                                   | ENST00000366965 | -0,533581471 |
| A_33_P3252043 | NM_000918       | P4HB         | prolyl 4-hydroxylase, beta polypeptide                        | ENST00000331483 | -0,533613947 |
| A_33_P3277373 | NM_020530       | OSM          | oncostatin M                                                  | ENST00000215781 | -0,533668678 |
| A_33_P3355659 | NM_001031807    | SKOR1        | SKI family transcriptional corepressor 1                      | ENST00000389002 | -0,533694632 |
| A_23_P162010  | NM_176875       | CCKBR        | cholecystokinin B receptor                                    | ENST00000525462 | -0,533745741 |
| A_33_P3363355 | NM_022377       | ICAM4        | intercellular adhesion molecule 4 (Landsteiner-Wiener bloo    | ENST00000393717 | -0,533785308 |
| A_33_P3335535 | NR_040046       | LOC100128682 | uncharacterized LOC100128682                                  | ENST00000536898 | -0,53390741  |
| A_33_P3304511 | NM_006588       | SULT1C4      | sulfotransferase family, cytosolic, 1C, member 4              | ENST00000272452 | -0,533945409 |
| A_23_P34597   | NM_001785       | CDA          | cytidine deaminase                                            | ENST00000461985 | -0,533954537 |
| A_23_P74229   | NM_032017       | STK40        | serine/threonine kinase 40                                    | ENST00000359297 | -0,533992923 |
| A_24_P183128  | NM_016619       | PLAC8        | placenta-specific 8                                           | ENST00000505406 | -0,534023527 |
| A_23_P345887  | NM_001244710    | GFPT1        | glutamine--fructose-6-phosphate transaminase 1                | ENST00000357308 | -0,534034595 |
| A_33_P3219785 | NM_023016       | ANKRD57      | ankyrin repeat domain 57                                      | ENST00000356454 | -0,534070159 |
| A_24_P319374  | NM_005814       | GPA33        | glycoprotein A33 (transmembrane)                              | ENST00000367868 | -0,534112405 |
| A_23_P125829  | NM_000291       | PGK1         | phosphoglycerate kinase 1                                     | ENST00000537456 | -0,534143865 |
| A_21_P0001336 | ENST00000479252 | LRRC8C       | leucine rich repeat containing 8 family, member C             | ENST00000479252 | -0,534174092 |
| A_33_P3215929 | NM_015366       | PRR5         | proline rich 5 (renal)                                        | ENST00000495017 | -0,53423224  |
| A_33_P3343479 | ENST00000484153 | LOC100506310 | uncharacterized protein C1orf167-like                         | ENST00000484153 | -0,534272998 |

|               |                |              |                                                               |                 |                 |              |
|---------------|----------------|--------------|---------------------------------------------------------------|-----------------|-----------------|--------------|
| A_21_P0010423 | TCONS_00029837 | XLOC_014272  |                                                               |                 |                 | -0,53433301  |
| A_23_P503127  | NM_145733      | Sep-03       | septin 3                                                      |                 | ENST00000396417 | -0,534425602 |
| A_23_P206724  | NM_175617      | MT1E         | metallothionein 1E                                            |                 | ENST00000330439 | -0,534475668 |
| A_33_P3225091 | NM_004756      | NUMBL        | numb homolog (Drosophila)-like                                |                 | ENST00000252891 | -0,534475964 |
| A_32_P141682  | NM_001145127   | EVPLL        | envoplakin-like                                               |                 | ENST00000399134 | -0,534509565 |
| A_23_P10497   | NM_198531      | ATP9B        | ATPase, class II, type 9B                                     |                 | ENST00000543761 | -0,53451387  |
| A_23_P109171  | NM_001195      | BFSP1        | beaded filament structural protein 1, filensin                |                 | ENST00000536626 | -0,534623087 |
| A_33_P3267186 | NM_001682      | ATP2B1       | ATPase, Ca <sup>++</sup> transporting, plasma membrane 1      |                 | ENST00000428670 | -0,534671464 |
| A_23_P63343   | NM_021995      | UTS2         | urotensin 2                                                   |                 | ENST00000054668 | -0,534681181 |
| A_23_P134295  | NM_198949      | NUDT1        | nudix (nucleoside diphosphate linked moiety X)-type motif     | ENST00000397049 |                 | -0,534707856 |
| A_23_P380951  | NM_144689      | ZNF420       | zinc finger protein 420                                       |                 | ENST00000337995 | -0,534776249 |
| A_23_P77066   | NM_022807      | SNRPN        | small nuclear ribonucleoprotein polypeptide N                 |                 | ENST00000444203 | -0,534837324 |
| A_23_P114952  | NM_016456      | TMEM9        | transmembrane protein 9                                       |                 | ENST00000472411 | -0,534842531 |
| A_23_P17663   | NM_002462      | MX1          | myxovirus (influenza virus) resistance 1, interferon-inducibl | ENST00000455164 |                 | -0,534846254 |
| A_23_P407614  | NM_152901      | PYDC1        | PYD (pyrin domain) containing 1                               |                 | ENST00000302964 | -0,534879659 |
| A_24_P256415  | NR_024447      | LOC100128288 | uncharacterized LOC100128288                                  |                 | ENST00000535173 | -0,534938554 |
| A_23_P76386   | NM_003044      | SLC6A12      | solute carrier family 6 (neurotransmitter transporter, betair | ENST00000424061 |                 | -0,534989576 |
| A_24_P148811  | NM_003707      | RUVBL1       | RuvB-like 1 (E. coli)                                         |                 | ENST00000417360 | -0,534993702 |
| A_23_P202837  | NM_053056      | CCND1        | cyclin D1                                                     |                 | ENST00000227507 | -0,535042949 |
| A_23_P118289  | NM_004765      | BCL7C        | B-cell CLL/lymphoma 7C                                        |                 | ENST00000215115 | -0,535043292 |
| A_23_P258340  | NM_021130      | PPIA         | peptidylprolyl isomerase A (cyclophilin A)                    |                 | ENST00000419275 | -0,535059445 |
| A_24_P160380  | NM_176871      | PDLIM2       | PDZ and LIM domain 2 (mystique)                               |                 | ENST00000265810 | -0,535186743 |
| A_23_P7250    | NM_001263      | CDS1         | CDP-diacylglycerol synthase (phosphatidate cytidyltransferase | ENST00000295887 |                 | -0,535241025 |
| A_33_P3413840 | NM_001205019   | GK           | glycerol kinase                                               |                 | ENST00000378945 | -0,535299069 |
| A_23_P103398  | NM_000447      | PSEN2        | presenilin 2 (Alzheimer disease 4)                            |                 | ENST00000366783 | -0,535312769 |
| A_23_P91414   | NM_080625      | C20orf160    | chromosome 20 open reading frame 160                          |                 | ENST00000262659 | -0,53532389  |
| A_23_P115824  | NM_012207      | HNRNPH3      | heterogeneous nuclear ribonucleoprotein H3 (2H9)              |                 | ENST00000265866 | -0,535333255 |
| A_23_P152678  | NM_015681      | B9D1         | B9 protein domain 1                                           |                 | ENST00000477683 | -0,53537461  |
| A_23_P86283   | NM_006762      | LAPTM5       | lysosomal protein transmembrane 5                             |                 | ENST00000294507 | -0,535386879 |



|               |                 |              |                                                             |                 |              |
|---------------|-----------------|--------------|-------------------------------------------------------------|-----------------|--------------|
| A_24_P171873  | NM_012176       | FBXO4        | F-box protein 4                                             | ENST00000513496 | -0,535435587 |
| A_23_P122863  | NM_001001555    | GRB10        | growth factor receptor-bound protein 10                     | ENST00000402497 | -0,535442986 |
| A_23_P115356  | NM_003689       | AKR7A2       | aldo-keto reductase family 7, member A2 (aflatoxin aldehyc  | ENST00000235835 | -0,53552537  |
| A_33_P3223467 | NM_025054       | VCPIP1       | valosin containing protein (p97)/p47 complex interacting pr | ENST00000310421 | -0,535576841 |
| A_33_P3306504 | NM_016368       | ISYNA1       | inositol-3-phosphate synthase 1                             | ENST00000338128 | -0,535628219 |
| A_23_P342000  | NM_144770       | RBM11        | RNA binding motif protein 11                                | ENST00000468643 | -0,535670093 |
| A_23_P147431  | NM_002350       | LYN          | v-yes-1 Yamaguchi sarcoma viral related oncogene homolog    | ENST00000519728 | -0,535683783 |
| A_21_P0007934 | ENST00000426509 | XLOC_010372  |                                                             | ENST00000426509 | -0,535702622 |
| A_24_P222997  | NM_032143       | ZRANB3       | zinc finger, RAN-binding domain containing 3                | ENST00000283060 | -0,535734955 |
| A_24_P321068  | NM_001859       | SLC31A1      | solute carrier family 31 (copper transporters), member 1    | ENST00000374210 | -0,535761483 |
| A_23_P115064  | NM_001878       | CRABP2       | cellular retinoic acid binding protein 2                    | ENST00000368221 | -0,535769068 |
| A_23_P414958  | NM_005761       | PLXNC1       | plexin C1                                                   | ENST00000549217 | -0,53577206  |
| A_23_P60387   | NM_017617       | NOTCH1       | notch 1                                                     | ENST00000277541 | -0,535889683 |
| A_23_P96285   | NM_022912       | REEP1        | receptor accessory protein 1                                | ENST00000535845 | -0,535936521 |
| A_32_P83049   | NM_014971       | EFR3B        | EFR3 homolog B (S. cerevisiae)                              |                 | -0,535968373 |
| A_21_P0010298 | TCONS_00029173  | XLOC_014112  |                                                             |                 | -0,536088692 |
| A_24_P323104  | NM_005219       | DIAPH1       | diaphanous homolog 1 (Drosophila)                           | ENST00000253811 | -0,53610563  |
| A_21_P0005021 | NR_038989       | LOC100507584 | uncharacterized LOC100507584                                | ENST00000506222 | -0,536168745 |
| A_33_P3367102 | NR_003242       | PFN1P2       | profilin 1 pseudogene 2                                     |                 | -0,536253318 |
| A_23_P377434  | NM_001080495    | TNRC18       | trinucleotide repeat containing 18                          | ENST00000430969 | -0,536265433 |
| A_33_P3247609 | NM_001005850    | ZNF835       | zinc finger protein 835                                     | ENST00000537055 | -0,536351974 |
| A_23_P124044  | NM_021008       | DEAF1        | deformed epidermal autoregulatory factor 1 (Drosophila)     | ENST00000527658 | -0,536399817 |
| A_23_P202988  | NM_015423       | AASDHPPT     | aminoadipate-semialdehyde dehydrogenase-phosphopante        | ENST00000534152 | -0,536453455 |
| A_23_P1083    | NM_002060       | GJA4         | gap junction protein, alpha 4, 37kDa                        | ENST00000342280 | -0,536560668 |
| A_33_P3217819 | NM_057749       | CCNE2        | cyclin E2                                                   | ENST00000542725 | -0,536652231 |
| A_24_P169092  | NM_032427       | MAML2        | mastermind-like 2 (Drosophila)                              | ENST00000440572 | -0,536693852 |
| A_23_P115645  | NM_001025076    | CELF2        | CUGBP, Elav-like family member 2                            | ENST00000537122 | -0,536714485 |
| A_23_P334263  | NM_145204       | SENP8        | SUMO/sentrin specific peptidase family member 8             | ENST00000340912 | -0,536727467 |
| A_33_P3272165 | NM_152416       | C8orf38      | chromosome 8 open reading frame 38                          | ENST00000454358 | -0,536761589 |

|               |                  |                |                                                           |                 |              |
|---------------|------------------|----------------|-----------------------------------------------------------|-----------------|--------------|
| A_23_P100141  | NM_023076        | UNKL           | unkempt homolog (Drosophila)-like                         | ENST00000397464 | -0,536777221 |
| A_23_P69383   | NM_031458        | PARP9          | poly (ADP-ribose) polymerase family, member 9             | ENST00000452457 | -0,536934234 |
| A_21_P0012383 | TCONS_I2_0001869 | XLOC_I2_009790 |                                                           |                 | -0,536981376 |
| A_21_P0010865 | ENST00000457848  | XLOC_I2_001911 |                                                           | ENST00000457848 | -0,537066552 |
| A_23_P122052  | NM_001008397     | GPX8           | glutathione peroxidase 8 (putative)                       | ENST00000503787 | -0,537089489 |
| A_23_P10497   | NM_198531        | ATP9B          | ATPase, class II, type 9B                                 | ENST00000543761 | -0,537107258 |
| A_23_P122863  | NM_001001555     | GRB10          | growth factor receptor-bound protein 10                   | ENST00000402497 | -0,537152908 |
| A_32_P4364    | NM_005745        | BCAP31         | B-cell receptor-associated protein 31                     | ENST00000458587 | -0,537304055 |
| A_23_P53152   | NM_020642        | AKIP1          | A kinase (PRKA) interacting protein 1                     | ENST00000534147 | -0,53730613  |
| A_23_P210886  | NM_138578        | BCL2L1         | BCL2-like 1                                               | ENST00000420653 | -0,53732889  |
| A_24_P830690  | NM_002613        | PDPK1          | 3-phosphoinositide dependent protein kinase-1             | ENST00000441549 | -0,537329166 |
| A_23_P105535  | NM_172240        | POC1B          | POC1 centriolar protein homolog B (Chlamydomonas)         | ENST00000378528 | -0,537370057 |
| A_33_P3327200 | NM_001001396     | ATP2B4         | ATPase, Ca <sup>++</sup> transporting, plasma membrane 4  | ENST00000341360 | -0,537466149 |
| A_23_P106362  | NM_020980        | AQP9           | aquaporin 9                                               | ENST00000219919 | -0,537483798 |
| A_23_P214222  | NM_002356        | MARCKS         | myristoylated alanine-rich protein kinase C substrate     | ENST00000368635 | -0,537722936 |
| A_24_P402080  | NM_001025100     | MBP            | myelin basic protein                                      | ENST00000397860 | -0,537808474 |
| A_23_P211814  | NM_002375        | MAP4           | microtubule-associated protein 4                          | ENST00000360240 | -0,538198809 |
| A_23_P106389  | NM_003612        | SEMA7A         | semaphorin 7A, GPI membrane anchor (John Milton Hagen     | ENST00000543145 | -0,538266111 |
| A_23_P10506   | NM_014485        | HPGDS          | hematopoietic prostaglandin D synthase                    | ENST00000295256 | -0,538266829 |
| A_23_P384044  | NM_152495        | CNIH3          | cornichon homolog 3 (Drosophila)                          | ENST00000272133 | -0,53827544  |
| A_23_P209232  | NM_024692        | CLIP4          | CAP-GLY domain containing linker protein family, member 4 | ENST00000379543 | -0,538332502 |
| A_23_P214603  | NM_005803        | FLOT1          | flotillin 1                                               | ENST00000456573 | -0,538340652 |
| A_33_P3398597 | NM_133180        | EPS8L1         | EPS8-like 1                                               | ENST00000310075 | -0,538412929 |
| A_33_P3300985 | XM_001716667     | LOC731932      | uncharacterized LOC731932                                 |                 | -0,538437337 |
| A_33_P3403615 | NM_000801        | FKBP1A         | FK506 binding protein 1A, 12kDa                           | ENST00000400137 | -0,538491511 |
| A_24_P143440  | NM_014183        | DYNLRB1        | dynein, light chain, roadblock-type 1                     | ENST00000357156 | -0,538501536 |
| A_23_P259621  | NM_032464        | LAT2           | linker for activation of T cells family, member 2         | ENST00000460943 | -0,538514509 |
| A_24_P229884  | NR_029454        | LOC440335      | uncharacterized LOC440335                                 |                 | -0,538681315 |
| A_23_P113613  | NM_022842        | CDCP1          | CUB domain containing protein 1                           | ENST00000296129 | -0,538736908 |

|               |                  |                |                                                                                    |  |                 |              |
|---------------|------------------|----------------|------------------------------------------------------------------------------------|--|-----------------|--------------|
| A_21_P0012486 | THC2644633       | XLOC_I2_010511 |                                                                                    |  |                 | -0,538762731 |
| A_23_P125829  | NM_000291        | PGK1           | phosphoglycerate kinase 1                                                          |  | ENST00000537456 | -0,53876876  |
| A_33_P3264404 | AK098270         | LOC100132593   | uncharacterized LOC100132593                                                       |  |                 | -0,538849025 |
| A_33_P3241782 | NM_001617        | ADD2           | adducin 2 (beta)                                                                   |  | ENST00000403045 | -0,538895023 |
| A_21_P0005615 | BC031939         | XLOC_006775    |                                                                                    |  | ENST00000523507 | -0,538897701 |
| A_23_P142560  | NM_014795        | ZEB2           | zinc finger E-box binding homeobox 2                                               |  | ENST00000409487 | -0,53891938  |
| A_23_P140668  | NM_005530        | IDH3A          | isocitrate dehydrogenase 3 (NAD+) alpha                                            |  | ENST00000299518 | -0,539158432 |
| A_24_P359246  | NR_033923        | C10orf136      | chromosome 10 open reading frame 136                                               |  | ENST00000374432 | -0,539194746 |
| A_32_P465742  | NM_003558        | PIP5K1B        | phosphatidylinositol-4-phosphate 5-kinase, type I, beta                            |  | ENST00000265382 | -0,539224891 |
| A_21_P0013545 | DA808148         | XLOC_I2_014686 |                                                                                    |  |                 | -0,539246106 |
| A_23_P206359  | NM_004360        | CDH1           | cadherin 1, type 1, E-cadherin (epithelial)                                        |  | ENST00000261769 | -0,5392749   |
| A_23_P31414   | NM_002553        | ORC5           | origin recognition complex, subunit 5                                              |  | ENST00000422497 | -0,539385919 |
| A_23_P210886  | NM_138578        | BCL2L1         | BCL2-like 1                                                                        |  | ENST00000420653 | -0,539459897 |
| A_23_P106362  | NM_020980        | AQP9           | aquaporin 9                                                                        |  | ENST00000219919 | -0,539481735 |
| A_21_P0006744 | ENST00000414308  | XLOC_008774    |                                                                                    |  | ENST00000414308 | -0,539502039 |
| A_21_P0011508 | TCONS_I2_0001050 | XLOC_I2_005622 |                                                                                    |  |                 | -0,539557461 |
| A_32_P41026   | NM_001024956     | SC5DL          | sterol-C5-desaturase (ERG3 delta-5-desaturase homolog, <i>S. cerevisiae</i> )-like |  |                 | -0,539585945 |
| A_33_P3346573 | NM_001134364     | MAP4           | microtubule-associated protein 4                                                   |  | ENST00000383736 | -0,539688985 |
| A_23_P80694   | NM_022899        | ACTR8          | ARP8 actin-related protein 8 homolog (yeast)                                       |  | ENST00000335754 | -0,539712527 |
| A_21_P0012129 | TCONS_I2_0001635 | XLOC_I2_008692 |                                                                                    |  |                 | -0,539835636 |
| A_23_P210763  | NM_000214        | JAG1           | jagged 1                                                                           |  | ENST00000254958 | -0,539867704 |
| A_23_P35820   | NM_005507        | CFL1           | cofilin 1 (non-muscle)                                                             |  | ENST00000526975 | -0,539931009 |
| A_23_P203665  | NM_018367        | ACER3          | alkaline ceramidase 3                                                              |  | ENST00000544113 | -0,540009733 |
| A_21_P0013037 | NR_038217        | LOC154092      | uncharacterized LOC154092                                                          |  | ENST00000431422 | -0,540149284 |
| A_23_P110941  | NM_001512        | GSTA4          | glutathione S-transferase alpha 4                                                  |  | ENST00000370960 | -0,540233349 |
| A_24_P284324  | NM_017728        | TMEM104        | transmembrane protein 104                                                          |  | ENST00000417024 | -0,540245867 |
| A_23_P202837  | NM_053056        | CCND1          | cyclin D1                                                                          |  | ENST00000227507 | -0,540301571 |
| A_23_P106405  | NM_002487        | NDN            | necdin homolog (mouse)                                                             |  | ENST00000331837 | -0,540369469 |
| A_23_P118289  | NM_004765        | BCL7C          | B-cell CLL/lymphoma 7C                                                             |  | ENST00000215115 | -0,540520579 |

|                |                |             |                                                              |                 |              |
|----------------|----------------|-------------|--------------------------------------------------------------|-----------------|--------------|
| A_23_P169197   | NM_032303      | HSDL2       | hydroxysteroid dehydrogenase like 2                          | ENST00000398803 | -0,540548553 |
| A_33_P3745146  | NM_001098517   | CADM1       | cell adhesion molecule 1                                     | ENST00000541434 | -0,540575123 |
| A_23_P106874   | NM_031293      | PMFBP1      | polyamine modulated factor 1 binding protein 1               | ENST00000379073 | -0,54060027  |
| A_23_P121545   | NM_201591      | GPM6A       | glycoprotein M6A                                             | ENST00000280187 | -0,540614954 |
| A_19_P00320056 | NR_024052      | HCG18       | HLA complex group 18 (non-protein coding)                    | ENST00000426671 | -0,54061994  |
| A_21_P0001008  | BC038299       | XLOC_000375 |                                                              |                 | -0,54062311  |
| A_23_P10385    | NM_016448      | DTL         | denticleless homolog (Drosophila)                            | ENST00000475419 | -0,540656774 |
| A_32_P527371   | NM_001039948   | SGSM1       | small G protein signaling modulator 1                        | ENST00000480523 | -0,540672522 |
| A_23_P204947   | NM_004004      | GJB2        | gap junction protein, beta 2, 26kDa                          | ENST00000382844 | -0,540673567 |
| A_33_P3311165  | XR_111802      | FLJ44313    | FLJ44313 protein                                             | ENST00000532511 | -0,54090873  |
| A_24_P397435   | NM_001044      | SLC6A3      | solute carrier family 6 (neurotransmitter transporter, dopar | ENST00000270349 | -0,540941332 |
| A_23_P309739   | NM_000125      | ESR1        | estrogen receptor 1                                          | ENST00000206249 | -0,541000998 |
| A_33_P3410459  | NM_001204255   | SCARB2      | scavenger receptor class B, member 2                         | ENST00000264896 | -0,541098    |
| A_23_P11697    | NM_145205      | HMGB4       | high mobility group box 4                                    | ENST00000522796 | -0,541200993 |
| A_23_P12911    | NM_022338      | C11orf24    | chromosome 11 open reading frame 24                          | ENST00000304271 | -0,541221607 |
| A_23_P102471   | NM_000251      | MSH2        | mutS homolog 2, colon cancer, nonpolyposis type 1 (E. coli)  | ENST00000543555 | -0,541234515 |
| A_23_P202004   | NM_020200      | PRTFDC1     | phosphoribosyl transferase domain containing 1               | ENST00000320152 | -0,541254116 |
| A_23_P160214   | NM_001080494   | TTC39A      | tetratricopeptide repeat domain 39A                          | ENST00000451380 | -0,541288009 |
| A_23_P114095   | NM_015884      | MBTPS2      | membrane-bound transcription factor peptidase, site 2        | ENST00000379484 | -0,541315124 |
| A_19_P00318232 | NM_001145205   | SHISA9      |                                                              | ENST00000482916 | -0,541315648 |
| A_24_P80776    | NM_001135575   | C6orf228    | chromosome 6 open reading frame 228                          | ENST00000416247 | -0,541334116 |
| A_23_P25735    | NM_002791      | PSMA6       | proteasome (prosome, macropain) subunit, alpha type, 6       | ENST00000554541 | -0,541348142 |
| A_23_P105535   | NM_172240      | POC1B       | POC1 centriolar protein homolog B (Chlamydomonas)            | ENST00000378528 | -0,541404539 |
| A_21_P0003030  | TCONS_00006208 | XLOC_002808 |                                                              |                 | -0,541434032 |
| A_33_P3214550  | NM_001557      | CXCR2       | chemokine (C-X-C motif) receptor 2                           | ENST00000318507 | -0,541444475 |
| A_19_P00801885 | XR_132736      | LOC440132   | hCG1815504                                                   | ENST00000440633 | -0,541495519 |
| A_33_P3221293  | NM_004403      | DFNA5       | deafness, autosomal dominant 5                               | ENST00000409775 | -0,541623227 |
| A_24_P227927   | NM_181078      | IL21R       | interleukin 21 receptor                                      | ENST00000337929 | -0,54162757  |
| A_33_P3388938  | NR_024402      | MGC23284    | uncharacterized LOC197187                                    |                 | -0,541652706 |

|                |                 |             |                                                            |                 |              |
|----------------|-----------------|-------------|------------------------------------------------------------|-----------------|--------------|
| A_23_P144877   | NM_004045       | ATOX1       | ATX1 antioxidant protein 1 homolog (yeast)                 | ENST00000313115 | -0,541669188 |
| A_19_P00318310 | TCONS_00012453  | XLOC_005238 |                                                            |                 | -0,541960194 |
| A_23_P105923   | NM_001362       | DIO3        | deiodinase, iodothyronine, type III                        | ENST00000359323 | -0,542017957 |
| A_23_P106389   | NM_003612       | SEMA7A      | semaphorin 7A, GPI membrane anchor (John Milton Hagen      | ENST00000543145 | -0,542085056 |
| A_33_P3354935  | NM_172212       | CSF1        | colony stimulating factor 1 (macrophage)                   | ENST00000369802 | -0,542087187 |
| A_23_P125829   | NM_000291       | PGK1        | phosphoglycerate kinase 1                                  | ENST00000537456 | -0,54209831  |
| A_24_P245246   | NM_003559       | PIP4K2B     | phosphatidylinositol-5-phosphate 4-kinase, type II, beta   | ENST00000269554 | -0,542194188 |
| A_23_P103070   | NM_003405       | YWHAH       | tyrosine 3-monooxygenase/tryptophan 5-monooxygenase        | ENST00000248975 | -0,542196446 |
| A_24_P826348   | NM_198581       | ZC3H6       | zinc finger CCCH-type containing 6                         | ENST00000409871 | -0,542278489 |
| A_23_P40821    | NM_032383       | HPS3        | Hermansky-Pudlak syndrome 3                                | ENST00000460822 | -0,542425051 |
| A_33_P3301469  | NR_027019       | ANKRD30BL   | ankyrin repeat domain 30B-like                             | ENST00000470729 | -0,542498363 |
| A_23_P319572   | NM_001077482    | NR1I3       | nuclear receptor subfamily 1, group I, member 3            | ENST00000367979 | -0,542499681 |
| A_21_P0002277  | THC2755124      | XLOC_001640 |                                                            |                 | -0,542499989 |
| A_23_P401700   | NM_019043       | APBB1IP     | amyloid beta (A4) precursor protein-binding, family B, mem | ENST00000376236 | -0,542697924 |
| A_23_P122052   | NM_001008397    | GPX8        | glutathione peroxidase 8 (putative)                        | ENST00000503787 | -0,542744387 |
| A_33_P3287108  | NM_207313       | TMEM132E    | transmembrane protein 132E                                 | ENST00000321639 | -0,542837627 |
| A_24_P577694   | NM_021116       | ADCY1       | adenylate cyclase 1 (brain)                                | ENST00000297323 | -0,542981883 |
| A_23_P106362   | NM_020980       | AQP9        | aquaporin 9                                                | ENST00000219919 | -0,543035629 |
| A_23_P113111   | NM_000044       | AR          | androgen receptor                                          | ENST00000544984 | -0,543055132 |
| A_21_P0008500  | TCONS_00022897  | XLOC_011151 |                                                            |                 | -0,543078349 |
| A_24_P270460   | NM_005532       | IFI27       | interferon, alpha-inducible protein 27                     | ENST00000555121 | -0,543085174 |
| A_23_P250644   | NM_080656       | CDKN2AIPNL  | CDKN2A interacting protein N-terminal like                 | ENST00000458198 | -0,543165037 |
| A_23_P106362   | NM_020980       | AQP9        | aquaporin 9                                                | ENST00000219919 | -0,54318297  |
| A_24_P393372   | NM_001100913    | PACS2       | phosphofurin acidic cluster sorting protein 2              | ENST00000447393 | -0,543262462 |
| A_24_P191417   | NM_005966       | NAB1        | NGFI-A binding protein 1 (EGR1 binding protein 1)          | ENST00000337386 | -0,543322198 |
| A_23_P63158    | NM_003126       | SPTA1       | spectrin, alpha, erythrocytic 1 (elliptocytosis 2)         | ENST00000368147 | -0,543331544 |
| A_23_P371266   | NM_015569       | DNM3        | dynamamin 3                                                | ENST00000359070 | -0,543382916 |
| A_21_P0001005  | ENST00000426515 | XLOC_000362 |                                                            | ENST00000426515 | -0,543492148 |
| A_23_P123086   | NR_027329       | KIAA1908    | uncharacterized LOC114796                                  |                 | -0,543510007 |



|               |                 |             |                                                               |                 |              |
|---------------|-----------------|-------------|---------------------------------------------------------------|-----------------|--------------|
| A_23_P115824  | NM_012207       | HNRNPH3     | heterogeneous nuclear ribonucleoprotein H3 (2H9)              | ENST00000265866 | -0,543696006 |
| A_24_P81947   | NM_014325       | CORO1C      | coronin, actin binding protein, 1C                            | ENST00000261401 | -0,543727632 |
| A_32_P176018  | NM_030812       | ACTL8       | actin-like 8                                                  | ENST00000375406 | -0,543766574 |
| A_24_P71153   | NM_000437       | PAFAH2      | platelet-activating factor acetylhydrolase 2, 40kDa           | ENST00000374282 | -0,543812532 |
| A_23_P117782  | NM_018357       | LARP6       | La ribonucleoprotein domain family, member 6                  | ENST00000299213 | -0,543822256 |
| A_24_P382489  | NM_198580       | SLC27A1     | solute carrier family 27 (fatty acid transporter), member 1   | ENST00000252595 | -0,543834614 |
| A_23_P141802  | NM_001040147    | SERPINB7    | serpin peptidase inhibitor, clade B (ovalbumin), member 7     | ENST00000540675 | -0,543838238 |
| A_23_P422193  | NM_003173       | SUV39H1     | suppressor of variegation 3-9 homolog 1 (Drosophila)          | ENST00000448548 | -0,543898938 |
| A_23_P146637  | NM_005866       | SIGMAR1     | sigma non-opioid intracellular receptor 1                     | ENST00000360710 | -0,544001526 |
| A_33_P3223503 | NM_023037       | FRY         | furry homolog (Drosophila)                                    | ENST00000380217 | -0,544001689 |
| A_23_P106874  | NM_031293       | PMFBP1      | polyamine modulated factor 1 binding protein 1                | ENST00000379073 | -0,544037278 |
| A_23_P102471  | NM_000251       | MSH2        | mutS homolog 2, colon cancer, nonpolyposis type 1 (E. coli)   | ENST00000543555 | -0,54406937  |
| A_21_P0008271 | ENST00000557689 | XLOC_010908 |                                                               | ENST00000557689 | -0,544195724 |
| A_23_P66050   | NM_033309       | B3GNT9      | UDP-GlcNAc:betaGal beta-1,3-N-acetylglucosaminyltransferase 9 |                 | -0,544225141 |
| A_33_P3394972 | NM_020896       | OSBPL5      | oxysterol binding protein-like 5                              | ENST00000357352 | -0,544252989 |
| A_23_P137173  | NM_021992       | TMSB15A     | thymosin beta 15a                                             | ENST00000289373 | -0,544264574 |
| A_33_P3272698 | NM_017823       | DUSP23      | dual specificity phosphatase 23                               | ENST00000368107 | -0,544311469 |
| A_33_P3342410 | NM_013302       | EEF2K       | eukaryotic elongation factor-2 kinase                         |                 | -0,544313465 |
| A_23_P316812  | NR_002796       | AKR7A2P1    | aldo-keto reductase family 7, member A2 pseudogene 1          |                 | -0,544364435 |
| A_23_P104972  | NM_023945       | MS4A5       | membrane-spanning 4-domains, subfamily A, member 5            | ENST00000300190 | -0,544391073 |
| A_33_P3347413 | NM_020524       | PBXIP1      | pre-B-cell leukemia homeobox interacting protein 1            | ENST00000542459 | -0,544407504 |
| A_33_P3404470 | NM_030930       | UNC93B1     | unc-93 homolog B1 (C. elegans)                                | ENST00000525262 | -0,544449632 |
| A_21_P0004156 | ENST00000507491 | XLOC_004928 |                                                               | ENST00000507491 | -0,544500005 |
| A_23_P24345   | NM_152264       | SLC39A13    | solute carrier family 39 (zinc transporter), member 13        | ENST00000362021 | -0,544528504 |
| A_33_P3296366 | NM_015720       | PODXL2      | podocalyxin-like 2                                            | ENST00000302192 | -0,544568073 |
| A_21_P0003345 | ENST00000511520 | XLOC_003488 |                                                               | ENST00000511520 | -0,544588927 |
| A_32_P32254   | NM_001848       | COL6A1      | collagen, type VI, alpha 1                                    | ENST00000538397 | -0,54460713  |
| A_23_P122724  | NM_004665       | VNN2        | vanin 2                                                       | ENST00000392389 | -0,544627376 |
| A_23_P60376   | NM_153200       | EDF1        | endothelial differentiation-related factor 1                  | ENST00000224073 | -0,544653478 |

|               |                |              |                                                              |                 |              |
|---------------|----------------|--------------|--------------------------------------------------------------|-----------------|--------------|
| A_23_P115824  | NM_012207      | HNRNPH3      | heterogeneous nuclear ribonucleoprotein H3 (2H9)             | ENST00000265866 | -0,544743188 |
| A_33_P3806965 | AK023806       | FLJ13744     | uncharacterized FLJ13744                                     |                 | -0,544751487 |
| A_23_P202837  | NM_053056      | CCND1        | cyclin D1                                                    | ENST00000227507 | -0,544829192 |
| A_21_P0014567 | XR_110327      | LOC100507594 | uncharacterized LOC100507594                                 |                 | -0,54488988  |
| A_23_P105535  | NM_172240      | POC1B        | POC1 centriolar protein homolog B (Chlamydomonas)            | ENST00000378528 | -0,544987285 |
| A_23_P27005   | NM_024308      | DHRS11       | dehydrogenase/reductase (SDR family) member 11               | ENST00000251312 | -0,54515904  |
| A_21_P0006292 | TCONS_00016402 | XLOC_007773  |                                                              |                 | -0,5452845   |
| A_23_P202837  | NM_053056      | CCND1        | cyclin D1                                                    | ENST00000227507 | -0,545339951 |
| A_23_P118289  | NM_004765      | BCL7C        | B-cell CLL/lymphoma 7C                                       | ENST00000215115 | -0,545363741 |
| A_21_P0002363 | TCONS_00004039 | XLOC_001878  |                                                              |                 | -0,545410184 |
| A_21_P0013846 | NR_015367      | LOC550643    | uncharacterized LOC550643                                    |                 | -0,54546578  |
| A_24_P943113  | NM_173359      | EIF4E3       | eukaryotic translation initiation factor 4E family member 3  | ENST00000295612 | -0,545519185 |
| A_21_P0005696 | TCONS_00014700 | XLOC_006798  |                                                              |                 | -0,54554331  |
| A_24_P154080  | NM_001397      | ECE1         | endothelin converting enzyme 1                               | ENST00000470394 | -0,545777367 |
| A_33_P3352253 | NM_001001925   | MTUS1        | microtubule associated tumor suppressor 1                    | ENST00000381862 | -0,545789719 |
| A_33_P3288359 | NM_002801      | PSMB10       | proteasome (prosome, macropain) subunit, beta type, 10       | ENST00000358514 | -0,545840086 |
| A_23_P115932  | NM_181840      | KCNK18       | potassium channel, subfamily K, member 18                    | ENST00000334549 | -0,545925786 |
| A_23_P103070  | NM_003405      | YWHAH        | tyrosine 3-monooxygenase/tryptophan 5-monooxygenase $\alpha$ | ENST00000248975 | -0,545926809 |
| A_23_P106362  | NM_020980      | AQP9         | aquaporin 9                                                  | ENST00000219919 | -0,545989682 |
| A_23_P204947  | NM_004004      | GJB2         | gap junction protein, beta 2, 26kDa                          | ENST00000382844 | -0,546173142 |
| A_33_P3414907 | NM_001200050   | NPL          | N-acetylneuraminatase pyruvate lyase (dihydrodipicolinate sy | ENST00000367555 | -0,546255494 |
| A_24_P319647  | NM_030764      | FCRL2        | Fc receptor-like 2                                           | ENST00000392274 | -0,546348545 |
| A_23_P115824  | NM_012207      | HNRNPH3      | heterogeneous nuclear ribonucleoprotein H3 (2H9)             | ENST00000265866 | -0,546510552 |
| A_33_P3236517 | NM_152401      | PDCL2        | phosducin-like 2                                             | ENST00000295645 | -0,546685953 |
| A_24_P335305  | NM_006187      | OAS3         | 2'-5'-oligoadenylate synthetase 3, 100kDa                    | ENST00000323881 | -0,546723349 |
| A_23_P10497   | NM_198531      | ATP9B        | ATPase, class II, type 9B                                    | ENST00000543761 | -0,54672406  |
| A_23_P40718   | NM_001003828   | PARVB        | parvin, beta                                                 | ENST00000406477 | -0,54682866  |
| A_23_P60517   | NM_181425      | FXN          | frataxin                                                     | ENST00000396366 | -0,546828913 |
| A_23_P106362  | NM_020980      | AQP9         | aquaporin 9                                                  | ENST00000219919 | -0,546930039 |

|               |                  |                |                                                           |                 |              |
|---------------|------------------|----------------|-----------------------------------------------------------|-----------------|--------------|
| A_33_P3384932 | NM_001243750     | NUDT8          | nudix (nucleoside diphosphate linked moiety X)-type motif | ENST00000376693 | -0,546971565 |
| A_33_P3405424 | NM_172374        | IL4I1          | interleukin 4 induced 1                                   | ENST00000341114 | -0,547025968 |
| A_23_P105535  | NM_172240        | POC1B          | POC1 centriolar protein homolog B (Chlamydomonas)         | ENST00000378528 | -0,547114997 |
| A_21_P0001598 | TCONS_00001741   | XLOC_001117    |                                                           |                 | -0,547141322 |
| A_21_P0004178 | ENST00000503145  | XLOC_004981    |                                                           | ENST00000503145 | -0,547206102 |
| A_23_P76488   | NM_001423        | EMP1           | epithelial membrane protein 1                             | ENST00000256951 | -0,547206692 |
| A_23_P372255  | NM_002221        | ITPKB          | inositol-trisphosphate 3-kinase B                         | ENST00000429204 | -0,54728191  |
| A_32_P122226  | NM_152435        | AMDHD1         | amidohydrolase domain containing 1                        | ENST00000548310 | -0,54735247  |
| A_33_P3389298 | NM_001099438     | ZNF30          | zinc finger protein 30                                    | ENST00000342559 | -0,547534647 |
| A_33_P3418025 | NM_001334        | CTSO           | cathepsin O                                               | ENST00000433477 | -0,547544137 |
| A_23_P112004  | NM_012472        | LRRC6          | leucine rich repeat containing 6                          | ENST00000395414 | -0,547744199 |
| A_23_P30603   | NM_003649        | DDO            | D-aspartate oxidase                                       | ENST00000368924 | -0,5477637   |
| A_24_P28657   | NM_015446        | AHCTF1         | AT hook containing transcription factor 1                 | ENST00000391829 | -0,54776593  |
| A_23_P108823  | NM_032523        | OSBPL6         | oxysterol binding protein-like 6                          | ENST00000315022 | -0,547828342 |
| A_23_P112846  | NM_001144978     | MTHFD2L        | methylenetetrahydrofolate dehydrogenase (NADP+ depend     | ENST00000492183 | -0,547993838 |
| A_24_P914513  | NM_183050        | BCKDHB         | branched chain keto acid dehydrogenase E1, beta polypept  | ENST00000320393 | -0,548118951 |
| A_23_P80342   | NM_006116        | TAB1           | TGF-beta activated kinase 1/MAP3K7 binding protein 1      | ENST00000216160 | -0,54814885  |
| A_33_P3391005 | NM_001144967     | NEDD4L         | neural precursor cell expressed, developmentally down-reg | ENST00000382850 | -0,548177169 |
| A_23_P42241   | NM_030876        | OR5V1          | olfactory receptor, family 5, subfamily V, member 1       | ENST00000377154 | -0,548280522 |
| A_21_P0001634 | TCONS_00001843   | XLOC_001228    |                                                           |                 | -0,548587997 |
| A_21_P0000534 | NM_001159287     | TPI1           | triosephosphate isomerase 1                               | ENST00000535434 | -0,548605337 |
| A_23_P26184   | NM_017996        | DET1           | de-etiolated homolog 1 (Arabidopsis)                      | ENST00000268148 | -0,548690291 |
| A_23_P110184  | NM_006745        | MSMO1          | methylsterol monooxygenase 1                              | ENST00000393766 | -0,548822019 |
| A_23_P138776  | NM_001610        | ACP2           | acid phosphatase 2, lysosomal                             | ENST00000525230 | -0,548877446 |
| A_21_P0011617 | ENST00000454535  | XLOC_I2_005693 |                                                           | ENST00000454535 | -0,548883438 |
| A_33_P3212804 | NM_001010859     | C22orf42       | chromosome 22 open reading frame 42                       | ENST00000467813 | -0,548996866 |
| A_21_P0011698 | TCONS_I2_0001252 | XLOC_I2_006718 |                                                           |                 | -0,549089276 |
| A_24_P46130   | NM_001099        | ACPP           | acid phosphatase, prostate                                | ENST00000336375 | -0,549131449 |
| A_32_P78816   | NM_004577        | PSPH           | phosphoserine phosphatase                                 | ENST00000395471 | -0,549331875 |

|                |                 |                |                                                            |                 |              |
|----------------|-----------------|----------------|------------------------------------------------------------|-----------------|--------------|
| A_23_P207037   | NM_007261       | CD300A         | CD300a molecule                                            | ENST00000310828 | -0,549403084 |
| A_23_P106405   | NM_002487       | NDN            | necdin homolog (mouse)                                     | ENST00000331837 | -0,54947919  |
| A_21_P0001958  | ENST00000440326 | XLOC_001826    |                                                            | ENST00000440326 | -0,549482345 |
| A_23_P258340   | NM_021130       | PPIA           | peptidylprolyl isomerase A (cyclophilin A)                 | ENST00000419275 | -0,549495515 |
| A_23_P106405   | NM_002487       | NDN            | necdin homolog (mouse)                                     | ENST00000331837 | -0,549514928 |
| A_33_P3363425  | NM_174938       | FRMD3          | FERM domain containing 3                                   | ENST00000304195 | -0,549649308 |
| A_23_P433798   | NM_024825       | PODNL1         | podocan-like 1                                             | ENST00000254320 | -0,549857828 |
| A_21_P0014041  | A_21_P0014041   | IPO13          |                                                            |                 | -0,549862362 |
| A_33_P3244347  | NM_001040716    | PC             | pyruvate carboxylase                                       | ENST00000393960 | -0,549904013 |
| A_23_P258340   | NM_021130       | PPIA           | peptidylprolyl isomerase A (cyclophilin A)                 | ENST00000419275 | -0,54998466  |
| A_21_P0012945  | BG214557        | XLOC_l2_011627 |                                                            |                 | -0,550054529 |
| A_23_P122508   | NM_080870       | DPCR1          | diffuse panbronchiolitis critical region 1                 | ENST00000414703 | -0,550143208 |
| A_33_P3367550  | NR_033379       | LOC401242      | uncharacterized LOC401242                                  | ENST00000411600 | -0,550177878 |
| A_21_P0003883  | TCONS_00009007  | XLOC_003853    |                                                            |                 | -0,5504522   |
| A_23_P120566   | NM_001042576    | RRBP1          | ribosome binding protein 1 homolog 180kDa (dog)            | ENST00000455029 | -0,550491453 |
| A_23_P26810    | NM_000546       | TP53           | tumor protein p53                                          | ENST00000396473 | -0,550546607 |
| A_23_P111361   | NM_173672       | PPIL6          | peptidylprolyl isomerase (cyclophilin)-like 6              | ENST00000521072 | -0,550563173 |
| A_33_P3270599  | NM_213674       | TPM2           | tropomyosin 2 (beta)                                       | ENST00000329305 | -0,550641547 |
| A_24_P65121    | NM_001040655    | TTC23          | tetratricopeptide repeat domain 23                         | ENST00000394130 | -0,550677036 |
| A_33_P3347528  | NR_003928       | RP11-165H20.1  | CHIA-like pseudogene                                       | ENST00000369743 | -0,550835102 |
| A_23_P258340   | NM_021130       | PPIA           | peptidylprolyl isomerase A (cyclophilin A)                 | ENST00000419275 | -0,550894447 |
| A_24_P28295    | NM_001243765    | RABGAP1L       | RAB GTPase activating protein 1-like                       | ENST00000367686 | -0,550987409 |
| A_33_P3343295  | NM_024535       | CORO7          | coronin 7                                                  | ENST00000539968 | -0,551010911 |
| A_23_P426663   | NM_198159       | MITF           | microphthalmia-associated transcription factor             | ENST00000394355 | -0,551167603 |
| A_23_P393758   | NM_138401       | FAM125A        | family with sequence similarity 125, member A              | ENST00000543795 | -0,551183197 |
| A_21_P0003189  | TCONS_00006707  | XLOC_003322    |                                                            |                 | -0,551306925 |
| A_23_P59528    | NM_020186       | ACN9           | ACN9 homolog ( <i>S. cerevisiae</i> )                      | ENST00000479853 | -0,551480282 |
| A_24_P83586    | NM_015506       | MMACHC         | methylmalonic aciduria (cobalamin deficiency) cblC type, w | ENST00000401061 | -0,551512297 |
| A_19_P00320469 | NR_015375       | FLJ35024       | uncharacterized LOC401491                                  |                 | -0,551523284 |

|                |                                  |             |                                                              |                 |              |
|----------------|----------------------------------|-------------|--------------------------------------------------------------|-----------------|--------------|
| A_23_P122796   | NM_016063                        | HDDC2       | HD domain containing 2                                       | ENST00000398153 | -0,551552596 |
| A_23_P256735   | NM_016134                        | PGCP        | plasma glutamate carboxypeptidase                            | ENST00000220763 | -0,551558962 |
| A_33_P3210343  | NM_001987                        | ETV6        | ets variant 6                                                |                 | -0,551609517 |
| A_32_P494620   | NM_182548                        | LHFPL5      | lipoma HMGIC fusion partner-like 5                           | ENST00000373853 | -0,551643049 |
| A_23_P120931   | NM_014508                        | APOBEC3C    | apolipoprotein B mRNA editing enzyme, catalytic polypeptide  | ENST00000361441 | -0,551704435 |
| A_23_P122077   | NM_016591                        | GCNT4       | glucosaminyl (N-acetyl) transferase 4, core 2                | ENST00000322348 | -0,551707203 |
| A_23_P331928   | NM_133493                        | CD109       | CD109 molecule                                               | ENST00000437994 | -0,551877679 |
| A_23_P102864   | NM_002772                        | TMPRSS15    | transmembrane protease, serine 15                            | ENST00000284885 | -0,551907661 |
| A_24_P49427    | NM_020864                        | KIAA1486    | KIAA1486                                                     | ENST00000272907 | -0,551914163 |
| A_23_P130488   | NM_000400                        | ERCC2       | excision repair cross-complementing rodent repair deficiency | ENST00000391944 | -0,551944286 |
| A_21_P0011444  | TCONS_I2_0000981: XLOC_I2_005276 |             |                                                              |                 | -0,55196788  |
| A_23_P96833    | NM_033438                        | SLAMF9      | SLAM family member 9                                         | ENST00000368093 | -0,551981798 |
| A_19_P00321264 | NR_015439                        | LOC550112   | uncharacterized LOC550112                                    |                 | -0,552004308 |
| A_33_P3313830  | NR_015360                        | FLJ33630    | uncharacterized LOC644873                                    |                 | -0,552144632 |
| A_23_P122863   | NM_001001555                     | GRB10       | growth factor receptor-bound protein 10                      | ENST00000402497 | -0,552259962 |
| A_33_P3224946  | XR_108603                        | FLJ46010    | FLJ46010 protein                                             |                 | -0,552420154 |
| A_21_P0010465  | TCONS_00029809                   | XLOC_014244 |                                                              |                 | -0,552444851 |
| A_23_P154849   | NM_138983                        | OLIG1       | oligodendrocyte transcription factor 1                       | ENST00000426947 | -0,552494631 |
| A_21_P0003301  | TCONS_00007281                   | XLOC_003284 |                                                              |                 | -0,552527475 |
| A_23_P114314   | NM_005193                        | CDX4        | caudal type homeobox 4                                       | ENST00000373514 | -0,552557822 |
| A_23_P348383   | NM_001080522                     | CC2D2A      | coiled-coil and C2 domain containing 2A                      | ENST00000510333 | -0,552641266 |
| A_23_P106362   | NM_020980                        | AQP9        | aquaporin 9                                                  | ENST00000219919 | -0,552646166 |
| A_23_P56213    | NM_020895                        | GRAMD1A     | GRAM domain containing 1A                                    | ENST00000411896 | -0,552652341 |
| A_23_P105535   | NM_172240                        | POC1B       | POC1 centriolar protein homolog B (Chlamydomonas)            | ENST00000378528 | -0,552754661 |
| A_21_P0010137  | NR_033840                        | LINC00163   | long intergenic non-protein coding RNA 163                   | ENST00000434081 | -0,552799296 |
| A_24_P69538    | NM_138554                        | TLR4        | toll-like receptor 4                                         | ENST00000472304 | -0,552951018 |
| A_24_P709377   | NR_015377                        | LOC654433   | uncharacterized LOC654433                                    |                 | -0,553129611 |
| A_33_P3411145  | NM_001145191                     | FAM200B     | family with sequence similarity 200, member B                | ENST00000504137 | -0,55318617  |
| A_23_P364766   | NM_001009608                     | C20orf94    | chromosome 20 open reading frame 94                          | ENST00000334534 | -0,553202203 |



|               |                  |                |                                                                                    |  |                 |              |
|---------------|------------------|----------------|------------------------------------------------------------------------------------|--|-----------------|--------------|
| A_21_P0008749 | TCONS_00023701   | XLOC_011506    |                                                                                    |  |                 | -0,553267466 |
| A_33_P3290914 | NM_006306        | SMC1A          | structural maintenance of chromosomes 1A                                           |  | ENST00000340213 | -0,553323048 |
| A_33_P3314525 | NR_026675        | CRYM-AS1       | CRYM antisense RNA 1 (non-protein coding)                                          |  |                 | -0,553414309 |
| A_21_P0010649 | TCONS_I2_0000149 | XLOC_I2_001086 |                                                                                    |  |                 | -0,553465913 |
| A_21_P0011887 | ENST00000430980  | LOC728763      | rootletin-like                                                                     |  | ENST00000430980 | -0,553477498 |
| A_23_P19691   | NM_014320        | HEBP2          | heme binding protein 2                                                             |  | ENST00000058691 | -0,55348704  |
| A_21_P0007102 | TCONS_00018936   | XLOC_008826    |                                                                                    |  |                 | -0,553501333 |
| A_21_P0008613 | THC2662357       | XLOC_011213    |                                                                                    |  |                 | -0,553528277 |
| A_33_P3405334 | NM_000405        | GM2A           | GM2 ganglioside activator                                                          |  | ENST00000357164 | -0,553541039 |
| A_33_P3386965 | NM_145167        | PIGM           | phosphatidylinositol glycan anchor biosynthesis, class M                           |  | ENST00000368090 | -0,553554978 |
| A_24_P298716  | NR_001553        | FAM197Y2P      | family with sequence similarity 197, Y-linked, member 2, ps                        |  | ENST00000420524 | -0,553588263 |
| A_23_P84189   | NM_181671        | PITPNC1        | phosphatidylinositol transfer protein, cytoplasmic 1                               |  | ENST00000299954 | -0,55359394  |
| A_23_P422732  | NM_145172        | WDR63          | WD repeat domain 63                                                                |  | ENST00000294664 | -0,553596025 |
| A_24_P228717  | NM_002872        | RAC2           | ras-related C3 botulinum toxin substrate 2 (rho family, small GTP-binding protein) |  | ENST00000441619 | -0,553608535 |
| A_23_P56759   | NM_016618        | KRCC1          | lysine-rich coiled-coil 1                                                          |  | ENST00000347055 | -0,553617318 |
| A_24_P13715   | NM_147188        | FBXO22         | F-box protein 22                                                                   |  | ENST00000308275 | -0,553680417 |
| A_23_P398637  | NM_152292        | RG9MTD2        | RNA (guanine-9-) methyltransferase domain containing 2                             |  | ENST00000273962 | -0,553815695 |
| A_23_P112846  | NM_001144978     | MTHFD2L        | methylenetetrahydrofolate dehydrogenase (NADP+ dependent)                          |  | ENST00000492183 | -0,55382843  |
| A_21_P0004441 | TCONS_00010468   | XLOC_004988    |                                                                                    |  |                 | -0,553865412 |
| A_33_P3273436 | NM_138801        | GALM           | galactose mutarotase (aldose 1-epimerase)                                          |  | ENST00000272252 | -0,553967897 |
| A_23_P17844   | NM_002854        | PVALB          | parvalbumin                                                                        |  | ENST00000404171 | -0,554059037 |
| A_23_P37910   | NM_002746        | MAPK3          | mitogen-activated protein kinase 3                                                 |  | ENST00000395202 | -0,554072748 |
| A_23_P374389  | NM_138499        | PWWP2B         | PWWP domain containing 2B                                                          |  | ENST00000368609 | -0,55422811  |
| A_23_P19852   | NM_152558        | IQCE           | IQ motif containing E                                                              |  | ENST00000404984 | -0,554296164 |
| A_21_P0001943 | ENST00000424170  | XLOC_001776    |                                                                                    |  | ENST00000424170 | -0,554440164 |
| A_33_P3416937 | ENST00000374624  | FAM206A        | family with sequence similarity 206, member A                                      |  | ENST00000374624 | -0,554442819 |
| A_24_P355876  | NM_003217        | TMBIM6         | transmembrane BAX inhibitor motif containing 6                                     |  | ENST00000542631 | -0,55448325  |
| A_21_P0006996 | TCONS_00018516   | XLOC_008825    |                                                                                    |  |                 | -0,554506207 |
| A_21_P0006733 | ENST00000457632  | XLOC_008721    |                                                                                    |  | ENST00000457632 | -0,55451346  |

|               |                 |                |                                                           |                 |              |
|---------------|-----------------|----------------|-----------------------------------------------------------|-----------------|--------------|
| A_21_P0006675 | ENST00000442526 | XLOC_008467    |                                                           | ENST00000442526 | -0,554565256 |
| A_21_P0003917 | CR936814        | XLOC_004207    |                                                           |                 | -0,55465719  |
| A_33_P3335725 | NM_000208       | INSR           | insulin receptor                                          | ENST00000302850 | -0,554750926 |
| A_21_P0010409 | ENST00000413244 | XLOC_014198    |                                                           | ENST00000413244 | -0,554989425 |
| A_21_P0007030 | TCONS_00018636  | XLOC_008984    |                                                           |                 | -0,555026859 |
| A_23_P252462  | NM_021808       | GALNT9         | UDP-N-acetyl-alpha-D-galactosamine:polypeptide N-acetylgl | ENST00000541995 | -0,555106598 |
| A_21_P0012751 | ENST00000514475 | XLOC_I2_010863 |                                                           | ENST00000514475 | -0,555221719 |
| A_21_P0000876 | NR_039993       | LOC100505894   | uncharacterized LOC100505894                              |                 | -0,555233873 |
| A_23_P11025   | NM_001178106    | ZNF185         | zinc finger protein 185 (LIM domain)                      | ENST00000370268 | -0,555254612 |
| A_23_P418485  | NM_152587       | C11orf65       | chromosome 11 open reading frame 65                       | ENST00000393084 | -0,555341048 |
| A_23_P57401   | NM_006767       | LZTR1          | leucine-zipper-like transcription regulator 1             | ENST00000463909 | -0,555455897 |
| A_33_P3256303 | NM_001206609    | SELPLG         | selectin P ligand                                         | ENST00000388962 | -0,555478775 |
| A_32_P44534   | NM_182559       | TMPRSS12       | transmembrane (C-terminal) protease, serine 12            | ENST00000398458 | -0,555514528 |
| A_23_P141974  | NM_003290       | TPM4           | tropomyosin 4                                             | ENST00000538887 | -0,555660943 |
| A_21_P0011208 | ENST00000440735 | XLOC_I2_003859 |                                                           | ENST00000440735 | -0,555882803 |
| A_24_P125881  | NM_005137       | DGCR2          | DiGeorge syndrome critical region gene 2                  | ENST00000545799 | -0,555909983 |
| A_21_P0000141 | NM_001198844    | RBM4           | RNA binding motif protein 4                               | ENST00000550837 | -0,555917066 |
| A_24_P82106   | NM_004995       | MMP14          | matrix metalloproteinase 14 (membrane-inserted)           | ENST00000311852 | -0,555934821 |
| A_24_P272761  | NM_020946       | DENND1A        | DENN/MADD domain containing 1A                            | ENST00000373624 | -0,556043286 |
| A_33_P3280213 | NM_001127695    | CTSA           | cathepsin A                                               | ENST00000372459 | -0,556074024 |
| A_23_P66732   | NM_031965       | GSG2           | germ cell associated 2 (haspin)                           | ENST00000325418 | -0,556076593 |
| A_23_P398566  | NM_173200       | NR4A3          | nuclear receptor subfamily 4, group A, member 3           | ENST00000330847 | -0,55610644  |
| A_23_P361584  | NM_152680       | TMEM154        | transmembrane protein 154                                 | ENST00000304385 | -0,556137753 |
| A_23_P103070  | NM_003405       | YWHAH          | tyrosine 3-monooxygenase/tryptophan 5-monooxygenase a     | ENST00000248975 | -0,556151165 |
| A_24_P244410  | NM_014042       | C11orf51       | chromosome 11 open reading frame 51                       | ENST00000538919 | -0,556278906 |
| A_33_P3381621 | ENST00000329020 | PLB1           | phospholipase B1                                          | ENST00000329020 | -0,556315826 |
| A_23_P142708  | NM_030805       | LMAN2L         | lectin, mannose-binding 2-like                            | ENST00000434524 | -0,55633267  |
| A_23_P28652   | NM_016085       | C2orf28        | chromosome 2 open reading frame 28                        | ENST00000380171 | -0,556505069 |
| A_24_P295877  | NM_014704       | CEP104         | centrosomal protein 104kDa                                | ENST00000438539 | -0,556752943 |

|                |                 |              |                                                            |                 |              |
|----------------|-----------------|--------------|------------------------------------------------------------|-----------------|--------------|
| A_23_P18598    | NM_018323       | PI4K2B       | phosphatidylinositol 4-kinase type 2 beta                  | ENST00000537420 | -0,556836111 |
| A_33_P3248439  | NM_033446       | FAM125B      | family with sequence similarity 125, member B              | ENST00000361171 | -0,556928574 |
| A_23_P13364    | NM_005013       | NUCB2        | nucleobindin 2                                             | ENST00000458064 | -0,556959648 |
| A_21_P0013848  | NM_005197       | FOXN3        | forkhead box N3                                            | ENST00000431331 | -0,557037628 |
| A_33_P3305373  | NM_001002907    | OR8K1        | olfactory receptor, family 8, subfamily K, member 1        | ENST00000279783 | -0,557038935 |
| A_23_P151805   | NM_006329       | FBLN5        | fibulin 5                                                  | ENST00000267620 | -0,557113058 |
| A_33_P3288159  | NM_018136       | ASPM         | asp (abnormal spindle) homolog, microcephaly associated (  | ENST00000294732 | -0,557125463 |
| A_23_P121215   | NM_003656       | CAMK1        | calcium/calmodulin-dependent protein kinase I              | ENST00000397277 | -0,557137842 |
| A_21_P0000950  | ENST00000416696 | XLOC_000055  |                                                            | ENST00000416696 | -0,557140394 |
| A_33_P3483634  | NR_027108       | LOC285593    | uncharacterized LOC285593                                  | ENST00000517299 | -0,557198587 |
| A_32_P86578    | NR_036580       | LOC389023    | uncharacterized LOC389023                                  | ENST00000432658 | -0,557207979 |
| A_23_P47806    | NM_012064       | MIP          | major intrinsic protein of lens fiber                      | ENST00000557333 | -0,557230955 |
| A_23_P153390   | NM_198492       | CLEC4G       | C-type lectin domain family 4, member G                    | ENST00000328853 | -0,557240059 |
| A_23_P35467    | NM_018464       | CISD1        | CDGSH iron sulfur domain 1                                 | ENST00000464703 | -0,557252597 |
| A_23_P106362   | NM_020980       | AQP9         | aquaporin 9                                                | ENST00000219919 | -0,557318721 |
| A_33_P3217834  | NM_014140       | SMARCAL1     | SWI/SNF related, matrix associated, actin dependent regula | ENST00000358207 | -0,557345493 |
| A_33_P3256680  | NM_004225       | MFHAS1       | malignant fibrous histiocytoma amplified sequence 1        | ENST00000276282 | -0,557351393 |
| A_33_P3292769  | NM_145912       | NFAM1        | NFAT activating protein with ITAM motif 1                  | ENST00000329021 | -0,557386501 |
| A_23_P114952   | NM_016456       | TMEM9        | transmembrane protein 9                                    | ENST00000472411 | -0,557641444 |
| A_23_P120860   | NM_003634       | NIPSNAP1     | nipsnap homolog 1 (C. elegans)                             | ENST00000216121 | -0,557696321 |
| A_21_P0000800  | NR_038431       | LOC100506054 | uncharacterized LOC100506054                               |                 | -0,557711008 |
| A_23_P104025   | NM_052965       | TSEN15       | tRNA splicing endonuclease 15 homolog (S. cerevisiae)      | ENST00000462677 | -0,557729996 |
| A_33_P3319760  | NM_003564       | TAGLN2       | transgelin 2                                               | ENST00000397334 | -0,557740004 |
| A_23_P11543    | NM_000147       | FUCA1        | fucosidase, alpha-L- 1, tissue                             | ENST00000374479 | -0,557911035 |
| A_19_P00809429 | NM_032689       | ZNF607       |                                                            | ENST00000355202 | -0,557914512 |
| A_23_P16834    | NM_022823       | FNDC4        | fibronectin type III domain containing 4                   | ENST00000491414 | -0,557947431 |
| A_33_P3228375  | NM_020750       | XPO5         | exportin 5                                                 | ENST00000372252 | -0,55803897  |
| A_32_P168442   | NR_003716       | HOTAIR       | HOX transcript antisense RNA (non-protein coding)          |                 | -0,558053642 |
| A_32_P209094   | NM_018291       | FGGY         | FGGY carbohydrate kinase domain containing                 | ENST00000480847 | -0,558140378 |

|               |                 |                |                                                             |                 |              |
|---------------|-----------------|----------------|-------------------------------------------------------------|-----------------|--------------|
| A_33_P3798989 | AK127847        | FLJ45950       | FLJ45950 protein                                            |                 | -0,558160103 |
| A_33_P3315134 | NR_026597       | DIRC3          | disrupted in renal carcinoma 3                              | ENST00000474063 | -0,558303632 |
| A_33_P3862375 | NM_001080481    | USP45          | ubiquitin specific peptidase 45                             | ENST00000539675 | -0,558308601 |
| A_21_P0013873 | ENST00000427671 | XLOC_I2_015842 |                                                             | ENST00000427671 | -0,558347637 |
| A_23_P78595   | NM_033543       | CEACAM21       | carcinoembryonic antigen-related cell adhesion molecule 2   | ENST00000401445 | -0,55843875  |
| A_33_P3362900 | NM_001145710    | LOC375190      | UPF0638 protein B                                           | ENST00000420135 | -0,558543661 |
| A_24_P126139  | NM_016370       | RAB9B          | RAB9B, member RAS oncogene family                           | ENST00000243298 | -0,558638132 |
| A_24_P56130   | NM_079423       | MYL6           | myosin, light chain 6, alkali, smooth muscle and non-muscle | ENST00000550639 | -0,558831416 |
| A_23_P129903  | NM_001037330    | TRIM16L        | tripartite motif containing 16-like                         | ENST00000395902 | -0,559027107 |
| A_23_P351913  | NM_152611       | LRRN4          | leucine rich repeat neuronal 4                              | ENST00000378858 | -0,559033822 |
| A_21_P0011069 | XR_109143       | LOC100506691   | uncharacterized LOC100506691                                |                 | -0,559209824 |
| A_23_P201376  | NM_014021       | SSX2IP         | synovial sarcoma, X breakpoint 2 interacting protein        | ENST00000437941 | -0,559236646 |
| A_21_P0014746 | ENST00000436772 | LOC100652965   |                                                             | ENST00000436772 | -0,559273693 |
| A_24_P179816  | NM_024330       | SLC27A3        | solute carrier family 27 (fatty acid transporter), member 3 | ENST00000468044 | -0,559294088 |
| A_23_P4036    | NM_018469       | TEX2           | testis expressed 2                                          | ENST00000258991 | -0,559327748 |
| A_33_P3257297 | NM_001008723    | CCDC147        | coiled-coil domain containing 147                           | ENST00000369704 | -0,5594382   |
| A_33_P3392952 | NM_004514       | FOXK2          | forkhead box K2                                             | ENST00000335255 | -0,559488348 |
| A_23_P104025  | NM_052965       | TSEN15         | tRNA splicing endonuclease 15 homolog (S. cerevisiae)       | ENST00000462677 | -0,559501483 |
| A_32_P72394   | NM_002735       | PRKAR1B        | protein kinase, cAMP-dependent, regulatory, type I, beta    | ENST00000417852 | -0,559541697 |
| A_23_P52806   | NM_012104       | BACE1          | beta-site APP-cleaving enzyme 1                             | ENST00000313005 | -0,559573667 |
| A_33_P3387951 | NM_020340       | KIAA1244       | KIAA1244                                                    | ENST00000251691 | -0,55960774  |
| A_24_P261760  | NM_005810       | KLRG1          | killer cell lectin-like receptor subfamily G, member 1      | ENST00000356986 | -0,559683819 |
| A_23_P7873    | NM_002388       | MCM3           | minichromosome maintenance complex component 3              | ENST00000340349 | -0,559693335 |
| A_23_P351467  | NR_002174       | CMAHP          | cytidine monophospho-N-acetylneuraminic acid hydroxylase    | ENST00000471416 | -0,559781993 |
| A_21_P0006988 | TCONS_00018492  | XLOC_008792    |                                                             |                 | -0,55982677  |
| A_24_P95038   | NM_021130       | PPIA           | peptidylprolyl isomerase A (cyclophilin A)                  | ENST00000415933 | -0,559850297 |
| A_24_P350576  | NM_015028       | TNIK           | TRAF2 and NCK interacting kinase                            | ENST00000369326 | -0,559910415 |
| A_32_P223140  | NM_145313       | RASGEF1A       | RasGEF domain family, member 1A                             | ENST00000395809 | -0,559956386 |
| A_21_P0007219 | TCONS_00019322  | XLOC_009167    |                                                             |                 | -0,560031478 |

|               |                 |                |                                                              |                 |  |              |
|---------------|-----------------|----------------|--------------------------------------------------------------|-----------------|--|--------------|
| A_21_P0003182 | TCONS_00006678  | XLOC_003273    |                                                              |                 |  | -0,560169403 |
| A_23_P98350   | NM_001165       | BIRC3          | baculoviral IAP repeat containing 3                          | ENST00000263464 |  | -0,560174157 |
| A_21_P0011690 | ENST00000453968 | XLOC_I2_006704 |                                                              | ENST00000453968 |  | -0,560236228 |
| A_33_P3398331 | NM_006690       | MMP24          | matrix metalloproteinase 24 (membrane-inserted)              | ENST00000246186 |  | -0,560302725 |
| A_23_P124837  | NM_002332       | LRP1           | low density lipoprotein receptor-related protein 1           | ENST00000556356 |  | -0,560304214 |
| A_23_P203957  | NM_175861       | TMTC1          | transmembrane and tetratricopeptide repeat containing 1      | ENST00000319685 |  | -0,560344481 |
| A_23_P169257  | NM_001244       | TNFSF8         | tumor necrosis factor (ligand) superfamily, member 8         | ENST00000223795 |  | -0,560482501 |
| A_33_P3211432 | NM_000265       | NCF1           | neutrophil cytosolic factor 1                                | ENST00000289473 |  | -0,560553719 |
| A_24_P339869  | NM_020727       | ZNF295         | zinc finger protein 295                                      | ENST00000310826 |  | -0,560592338 |
| A_21_P0003684 | BU655974        | XLOC_003790    |                                                              |                 |  | -0,560688052 |
| A_24_P319923  | NM_053025       | MYLK           | myosin light chain kinase                                    | ENST00000418370 |  | -0,560705692 |
| A_23_P117782  | NM_018357       | LARP6          | La ribonucleoprotein domain family, member 6                 | ENST00000299213 |  | -0,56072078  |
| A_33_P3358213 | NM_207421       | PADI6          | peptidyl arginine deiminase, type VI                         | ENST00000434762 |  | -0,560732855 |
| A_21_P0014119 | ENST00000474250 | LOC100507239   |                                                              | ENST00000474250 |  | -0,560808537 |
| A_23_P10647   | NM_018659       | CYTL1          | cytokine-like 1                                              | ENST00000307746 |  | -0,560810139 |
| A_23_P114952  | NM_016456       | TMEM9          | transmembrane protein 9                                      | ENST00000472411 |  | -0,560831191 |
| A_23_P136355  | NM_018194       | HHAT           | hedgehog acyltransferase                                     | ENST00000367010 |  | -0,560929288 |
| A_23_P258340  | NM_021130       | PPIA           | peptidylprolyl isomerase A (cyclophilin A)                   | ENST00000419275 |  | -0,560999498 |
| A_23_P112554  | NM_001855       | COL15A1        | collagen, type XV, alpha 1                                   | ENST00000375001 |  | -0,561022404 |
| A_21_P0011966 | NR_026758       | LOC440905      | uncharacterized LOC440905                                    | ENST00000428123 |  | -0,561133231 |
| A_23_P108751  | NM_001039492    | FHL2           | four and a half LIM domains 2                                | ENST00000358129 |  | -0,561237527 |
| A_23_P131435  | NM_014880       | CD302          | CD302 molecule                                               | ENST00000554112 |  | -0,56142742  |
| A_23_P63281   | NM_001029885    | GLTPD1         | glycolipid transfer protein domain containing 1              | ENST00000343938 |  | -0,561438944 |
| A_33_P3413989 | NM_000062       | SERPING1       | serpin peptidase inhibitor, clade G (C1 inhibitor), member 1 | ENST00000405496 |  | -0,561527371 |
| A_23_P208493  | NM_005874       | LILRB2         | leukocyte immunoglobulin-like receptor, subfamily B (with    | ENST00000434421 |  | -0,561590964 |
| A_21_P0003444 | NR_045414       | HTT-AS1        | HTT antisense RNA 1 (non-protein coding)                     | ENST00000503893 |  | -0,561622477 |
| A_33_P3712008 | AL512720        | DKFZp547J222   | uncharacterized LOC84237                                     |                 |  | -0,561688817 |
| A_24_P132276  | NM_018292       | QRSL1          | glutaminyl-tRNA synthase (glutamine-hydrolyzing)-like 1      | ENST00000369046 |  | -0,561697484 |
| A_23_P114095  | NM_015884       | MBTPS2         | membrane-bound transcription factor peptidase, site 2        | ENST00000379484 |  | -0,56172395  |



|               |                 |                |                                                             |                 |              |
|---------------|-----------------|----------------|-------------------------------------------------------------|-----------------|--------------|
| A_33_P3251796 | NM_014317       | PDSS1          | prenyl (decaprenyl) diphosphate synthase, subunit 1         | ENST00000396343 | -0,561740268 |
| A_24_P494454  | NM_001010862    | SPIN3          | spindlin family, member 3                                   |                 | -0,561789911 |
| A_21_P0006401 | NR_027131       | NKAPP1         | NFKB activating protein pseudogene 1                        |                 | -0,561796595 |
| A_21_P0011950 | ENST00000451884 | XLOC_I2_008203 |                                                             | ENST00000451884 | -0,562012333 |
| A_23_P132226  | NM_001008566    | TPST2          | tyrosylprotein sulfotransferase 2                           | ENST00000528868 | -0,562014874 |
| A_23_P117387  | NM_054024       | MIA2           | melanoma inhibitory activity 2                              | ENST00000556784 | -0,562090616 |
| A_23_P307761  | NM_031215       | CABLES2        | Cdk5 and Abl enzyme substrate 2                             | ENST00000279101 | -0,562113708 |
| A_23_P120103  | NM_002252       | KCNS3          | potassium voltage-gated channel, delayed-rectifier, subfam  | ENST00000403915 | -0,562169671 |
| A_24_P163237  | NM_020225       | STOX2          | storkhead box 2                                             | ENST00000506529 | -0,562175581 |
| A_33_P3228892 | XM_001714096    | LOC100130370   | uncharacterized LOC100130370                                |                 | -0,56219326  |
| A_33_P3327479 | NM_016598       | ZDHHC3         | zinc finger, DHHC-type containing 3                         | ENST00000339420 | -0,562264808 |
| A_23_P10305   | NM_175859       | CTPS2          | CTP synthase II                                             | ENST00000380207 | -0,562310778 |
| A_23_P150768  | NM_007256       | SLCO2B1        | solute carrier organic anion transporter family, member 2B: | ENST00000524599 | -0,562401    |
| A_23_P122724  | NM_004665       | VNN2           | vanin 2                                                     | ENST00000392389 | -0,562578449 |
| A_21_P0010661 | THC2776855      | XLOC_I2_001196 |                                                             |                 | -0,562614621 |
| A_23_P20427   | NM_015178       | RHOBTB2        | Rho-related BTB domain containing 2                         | ENST00000251822 | -0,562631192 |
| A_23_P353014  | NM_172364       | CACNA2D4       | calcium channel, voltage-dependent, alpha 2/delta subunit   | ENST00000382722 | -0,562703803 |
| A_21_P0013574 | NM_001242767    | MTHFD1L        | methylenetetrahydrofolate dehydrogenase (NADP+ depenc       | ENST00000432011 | -0,562803748 |
| A_23_P22352   | ENST00000342409 | FRMD4A         | FERM domain containing 4A                                   | ENST00000342409 | -0,562850687 |
| A_24_P330633  | NM_000353       | TAT            | tyrosine aminotransferase                                   | ENST00000355962 | -0,562896539 |
| A_21_P0007133 | AK056982        | XLOC_009372    |                                                             |                 | -0,562936108 |
| A_21_P0007865 | TCONS_00021257  | XLOC_009955    |                                                             |                 | -0,562946444 |
| A_33_P3241786 | NM_017482       | ADD2           | adducin 2 (beta)                                            | ENST00000413157 | -0,563085174 |
| A_23_P89902   | NM_005619       | RTN2           | reticulon 2                                                 | ENST00000245923 | -0,563195071 |
| A_23_P204269  | NM_006313       | USP15          | ubiquitin specific peptidase 15                             | ENST00000393654 | -0,5632085   |
| A_32_P18440   | NM_032199       | ARID5B         | AT rich interactive domain 5B (MRF1-like)                   | ENST00000279873 | -0,563215155 |
| A_21_P0006239 | XR_109854       | LOC100506532   | uncharacterized LOC100506532                                |                 | -0,563264222 |
| A_33_P3394252 | NM_152519       | C2orf67        | chromosome 2 open reading frame 67                          | ENST00000281772 | -0,563264523 |
| A_23_P3221    | NM_021199       | SQRDL          | sulfide quinone reductase-like (yeast)                      | ENST00000260324 | -0,563323819 |

|                |                |              |                                                                      |                 |              |
|----------------|----------------|--------------|----------------------------------------------------------------------|-----------------|--------------|
| A_23_P36689    | NM_006992      | LRRC23       | leucine rich repeat containing 23                                    | ENST00000486401 | -0,563352645 |
| A_23_P151506   | NM_016445      | PLEK2        | pleckstrin 2                                                         | ENST00000216446 | -0,563358944 |
| A_23_P113701   | NM_002607      | PDGFA        | platelet-derived growth factor alpha polypeptide                     | ENST00000402802 | -0,563502625 |
| A_23_P204947   | NM_004004      | GJB2         | gap junction protein, beta 2, 26kDa                                  | ENST00000382844 | -0,563820207 |
| A_33_P3821313  | NR_033898      | LOC285577    | uncharacterized LOC285577                                            | ENST00000505443 | -0,563916051 |
| A_23_P149529   | NM_002353      | TACSTD2      | tumor-associated calcium signal transducer 2                         | ENST00000371225 | -0,563926612 |
| A_23_P119778   | NM_020342      | SLC39A10     | solute carrier family 39 (zinc transporter), member 10               | ENST00000409086 | -0,56398301  |
| A_23_P116829   | NM_003348      | UBE2N        | ubiquitin-conjugating enzyme E2N                                     | ENST00000318066 | -0,563991804 |
| A_33_P3411357  | NR_024157      | DGCR11       | DiGeorge syndrome critical region gene 11                            |                 | -0,56407529  |
| A_21_P0006915  | TCONS_00018339 | XLOC_008619  |                                                                      |                 | -0,564123691 |
| A_33_P3284939  | NM_199129      | TMEM189      | transmembrane protein 189                                            | ENST00000371652 | -0,564140117 |
| A_23_P95823    | NM_145080      | NSMCE1       | non-SMC element 1 homolog ( <i>S. cerevisiae</i> )                   | ENST00000361439 | -0,564193684 |
| A_23_P122116   | NM_016222      | DDX41        | DEAD (Asp-Glu-Ala-Asp) box polypeptide 41                            | ENST00000507900 | -0,564242762 |
| A_23_P258340   | NM_021130      | PPIA         | peptidylprolyl isomerase A (cyclophilin A)                           | ENST00000419275 | -0,564250293 |
| A_23_P102864   | NM_002772      | TMPRSS15     | transmembrane protease, serine 15                                    | ENST00000284885 | -0,564317492 |
| A_23_P257668   | NM_024926      | TTC26        | tetratricopeptide repeat domain 26                                   | ENST00000430935 | -0,564351435 |
| A_23_P205531   | NM_002937      | RNASE4       | ribonuclease, RNase A family, 4                                      | ENST00000397995 | -0,564399058 |
| A_23_P100499   | NM_024589      | ROGDI        | rogdi homolog ( <i>Drosophila</i> )                                  | ENST00000322048 | -0,564401483 |
| A_24_P15043    | NM_025010      | KLHL18       | kelch-like 18 ( <i>Drosophila</i> )                                  | ENST00000232766 | -0,564420009 |
| A_23_P102471   | NM_000251      | MSH2         | mutS homolog 2, colon cancer, nonpolyposis type 1 ( <i>E. coli</i> ) | ENST00000543555 | -0,564538758 |
| A_23_P108751   | NM_001039492   | FHL2         | four and a half LIM domains 2                                        | ENST00000358129 | -0,564547025 |
| A_23_P10497    | NM_198531      | ATP9B        | ATPase, class II, type 9B                                            | ENST00000543761 | -0,564585326 |
| A_33_P3279276  | NM_001080423   | GRIP2        | glutamate receptor interacting protein 2                             | ENST00000507975 | -0,56460688  |
| A_19_P00805625 | BC038559       | LOC100506190 | uncharacterized LOC100506190                                         |                 | -0,564672759 |
| A_23_P52647    | NM_006795      | EHD1         | EH-domain containing 1                                               | ENST00000359393 | -0,564716616 |
| A_23_P156180   | NM_003059      | SLC22A4      | solute carrier family 22 (organic cation/ergothioneine trans         | ENST00000200652 | -0,564747388 |
| A_23_P258340   | NM_021130      | PPIA         | peptidylprolyl isomerase A (cyclophilin A)                           | ENST00000419275 | -0,564835409 |
| A_23_P121825   | NM_024941      | C5orf44      | chromosome 5 open reading frame 44                                   | ENST00000545191 | -0,564841913 |
| A_23_P106362   | NM_020980      | AQP9         | aquaporin 9                                                          | ENST00000219919 | -0,564882198 |

|                |                 |              |                                                               |                 |              |
|----------------|-----------------|--------------|---------------------------------------------------------------|-----------------|--------------|
| A_23_P321354   | NM_144649       | TMEM71       | transmembrane protein 71                                      | ENST00000356838 | -0,564893048 |
| A_23_P40821    | NM_032383       | HPS3         | Hermansky-Pudlak syndrome 3                                   | ENST00000460822 | -0,564893552 |
| A_33_P3362178  | NM_001243007    | PROX2        | prospero homeobox 2                                           | ENST00000445876 | -0,56494061  |
| A_33_P3362696  | NM_018157       | RIC8B        | resistance to inhibitors of cholinesterase 8 homolog B (C. el | ENST00000392837 | -0,564941376 |
| A_23_P106362   | NM_020980       | AQP9         | aquaporin 9                                                   | ENST00000219919 | -0,565064009 |
| A_23_P92261    | NM_032331       | ECE2         | endothelin converting enzyme 2                                | ENST00000324557 | -0,565088142 |
| A_23_P103070   | NM_003405       | YWHAH        | tyrosine 3-monooxygenase/tryptophan 5-monooxygenase $\alpha$  | ENST00000248975 | -0,565159596 |
| A_33_P3226832  | NM_001993       | F3           | coagulation factor III (thromboplastin, tissue factor)        | ENST00000370207 | -0,565230298 |
| A_23_P104025   | NM_052965       | TSEN15       | tRNA splicing endonuclease 15 homolog (S. cerevisiae)         | ENST00000462677 | -0,565310589 |
| A_33_P3234020  | NM_004884       | IGDCC3       | immunoglobulin superfamily, DCC subclass, member 3            | ENST00000327987 | -0,565326666 |
| A_23_P116512   | NM_024841       | PRR5L        | proline rich 5 like                                           | ENST00000389693 | -0,565332778 |
| A_33_P3232120  | ENST00000371468 | NELF         | nasal embryonic LHRH factor                                   | ENST00000371468 | -0,565366234 |
| A_21_P0007548  | TCONS_00020396  | XLOC_009725  |                                                               |                 | -0,565372687 |
| A_23_P138507   | NM_001786       | CDK1         | cyclin-dependent kinase 1                                     | ENST00000448257 | -0,565504686 |
| A_23_P357860   | NM_003262       | SEC62        | SEC62 homolog (S. cerevisiae)                                 | ENST00000337002 | -0,5655683   |
| A_23_P113701   | NM_002607       | PDGFA        | platelet-derived growth factor alpha polypeptide              | ENST00000402802 | -0,56565894  |
| A_24_P64329    | NM_173575       | STK32C       | serine/threonine kinase 32C                                   | ENST00000368625 | -0,565669589 |
| A_24_P234856   | NM_001745       | CAMLG        | calcium modulating ligand                                     | ENST00000297156 | -0,565672788 |
| A_23_P255376   | NM_017918       | CCDC109B     | coiled-coil domain containing 109B                            | ENST00000394650 | -0,565705688 |
| A_23_P104996   | NM_004183       | BEST1        | bestrophin 1                                                  | ENST00000524877 | -0,565729074 |
| A_23_P26810    | NM_000546       | TP53         | tumor protein p53                                             | ENST00000396473 | -0,565878615 |
| A_33_P3570208  | NR_036497       | LPP-AS2      | LPP antisense RNA 2 (non-protein coding)                      |                 | -0,565950428 |
| A_33_P3399267  | NM_172200       | IL15RA       | interleukin 15 receptor, alpha                                | ENST00000379972 | -0,566104707 |
| A_23_P128817   | NM_004563       | PCK2         | phosphoenolpyruvate carboxykinase 2 (mitochondrial)           | ENST00000545054 | -0,566137078 |
| A_33_P3435493  | XR_110483       | LOC400768    | uncharacterized LOC400768                                     |                 | -0,566154181 |
| A_23_P40821    | NM_032383       | HPS3         | Hermansky-Pudlak syndrome 3                                   | ENST00000460822 | -0,566157489 |
| A_32_P515431   | XR_110830       | LOC100132057 | phosphodiesterase 4D interacting protein pseudogene           |                 | -0,566183754 |
| A_21_P0002225  | TCONS_00003709  | XLOC_001496  |                                                               |                 | -0,566236527 |
| A_19_P00812308 | NR_036444       | LOC400550    | uncharacterized LOC400550                                     |                 | -0,56624456  |

|               |                 |                |                                                            |                 |              |
|---------------|-----------------|----------------|------------------------------------------------------------|-----------------|--------------|
| A_33_P3268783 | NM_133463       | AMZ1           | archaelysin family metallopeptidase 1                      | ENST00000312371 | -0,566292798 |
| A_33_P3220277 | ENST00000398782 | RRBP1          | ribosome binding protein 1 homolog 180kDa (dog)            | ENST00000398782 | -0,566325366 |
| A_21_P0013258 | THC2565454      | XLOC_I2_013532 |                                                            |                 | -0,566343579 |
| A_23_P427180  | NM_178828       | C9orf79        | chromosome 9 open reading frame 79                         | ENST00000325643 | -0,566367439 |
| A_23_P106874  | NM_031293       | PMFBP1         | polyamine modulated factor 1 binding protein 1             | ENST00000379073 | -0,566372346 |
| A_23_P123071  | NM_001233       | CAV2           | caveolin 2                                                 | ENST00000498493 | -0,566411561 |
| A_23_P31453   | NM_012449       | STEAP1         | six transmembrane epithelial antigen of the prostate 1     | ENST00000297205 | -0,56641674  |
| A_23_P210886  | NM_138578       | BCL2L1         | BCL2-like 1                                                | ENST00000420653 | -0,566418172 |
| A_33_P3268343 | NM_001029891    | PGAM4          | phosphoglycerate mutase family member 4                    | ENST00000458128 | -0,566419023 |
| A_23_P119886  | NM_001486       | GCKR           | glucokinase (hexokinase 4) regulator                       | ENST00000264717 | -0,566498459 |
| A_23_P151820  | NM_024832       | RIN3           | Ras and Rab interactor 3                                   | ENST00000428147 | -0,56659415  |
| A_23_P28878   | NM_001039140    | C20orf27       | chromosome 20 open reading frame 27                        | ENST00000379772 | -0,566655856 |
| A_21_P0007329 | ENST00000531363 | XLOC_009398    |                                                            | ENST00000531363 | -0,566762407 |
| A_33_P3227275 | ENST00000369053 | TARS2          | threonyl-tRNA synthetase 2, mitochondrial (putative)       | ENST00000369053 | -0,566768937 |
| A_33_P3327921 | NM_012249       | RHOQ           | ras homolog gene family, member Q                          |                 | -0,56677149  |
| A_33_P3579391 | DB361496        | SNORA77        | small nucleolar RNA, H/ACA box 77                          |                 | -0,566837741 |
| A_32_P132860  | NR_024280       | UNQ6494        | uncharacterized LOC100129066                               |                 | -0,566990739 |
| A_23_P254978  | NM_032026       | TATDN1         | TatD DNase domain containing 1                             | ENST00000523888 | -0,566994957 |
| A_24_P945113  | NM_000020       | ACVRL1         | activin A receptor type II-like 1                          | ENST00000550683 | -0,567067104 |
| A_23_P94879   | NM_000506       | F2             | coagulation factor II (thrombin)                           | ENST00000311907 | -0,567120305 |
| A_23_P217621  | NM_024885       | TAF7L          | TAF7-like RNA polymerase II, TATA box binding protein (TBF | ENST00000356784 | -0,567237391 |
| A_33_P3352349 | NM_001190460    | KRTAP9-1       | keratin associated protein 9-1                             | ENST00000377723 | -0,56725262  |
| A_23_P48596   | NM_198232       | RNASE1         | ribonuclease, RNase A family, 1 (pancreatic)               | ENST00000412779 | -0,567337355 |
| A_23_P258340  | NM_021130       | PPIA           | peptidylprolyl isomerase A (cyclophilin A)                 | ENST00000419275 | -0,567379658 |
| A_24_P368735  | NM_173664       | ARL10          | ADP-ribosylation factor-like 10                            | ENST00000310389 | -0,567385974 |
| A_23_P151159  | NM_032300       | TCHP           | trichoplein, keratin filament binding                      | ENST00000312777 | -0,567446053 |
| A_23_P113748  | NM_024697       | ZNF385D        | zinc finger protein 385D                                   | ENST00000494118 | -0,567497225 |
| A_21_P0007349 | TCONS_00019631  | XLOC_009432    |                                                            |                 | -0,56759352  |
| A_24_P67534   | NM_001163438    | CXorf69        | chromosome X open reading frame 69                         | ENST00000330288 | -0,567624069 |

|               |                 |                |                                                            |                 |              |
|---------------|-----------------|----------------|------------------------------------------------------------|-----------------|--------------|
| A_21_P0000901 | NR_040100       | ENTPD3-AS1     | ENTPD3 antisense RNA 1 (non-protein coding)                |                 | -0,567815839 |
| A_33_P3308347 | NM_007037       | ADAMTS8        | ADAM metallopeptidase with thrombospondin type 1 motif     | ENST00000257359 | -0,568101348 |
| A_33_P3346083 | NM_181807       | DCDC1          | doublecortin domain containing 1                           | ENST00000452803 | -0,56817319  |
| A_24_P63799   | NM_018292       | QRSL1          | glutaminyl-tRNA synthase (glutamine-hydrolyzing)-like 1    | ENST00000369046 | -0,568190861 |
| A_23_P71946   | NM_017688       | BSPRY          | B-box and SPRY domain containing                           | ENST00000374183 | -0,568287915 |
| A_23_P101084  | NM_032598       | SPATA22        | spermatogenesis associated 22                              | ENST00000541913 | -0,568430691 |
| A_23_P151307  | NM_006105       | RAPGEF3        | Rap guanine nucleotide exchange factor (GEF) 3             | ENST00000490387 | -0,568439865 |
| A_21_P0014380 | XR_109525       | LOC100507486   | uncharacterized LOC100507486                               |                 | -0,568467978 |
| A_23_P356139  | NM_018121       | FAM178A        | family with sequence similarity 178, member A              | ENST00000238961 | -0,568492993 |
| A_23_P101319  | NM_152354       | ZNF285         | zinc finger protein 285                                    | ENST00000544719 | -0,568581431 |
| A_23_P306346  | NM_152420       | C9orf41        | chromosome 9 open reading frame 41                         | ENST00000376834 | -0,568648241 |
| A_33_P3379947 | NM_005514       | HLA-B          | major histocompatibility complex, class I, B               | ENST00000546599 | -0,568669628 |
| A_24_P297078  | NM_020531       | C20orf3        | chromosome 20 open reading frame 3                         | ENST00000217456 | -0,568690862 |
| A_23_P14774   | NM_004390       | CTSH           | cathepsin H                                                | ENST00000533777 | -0,56878639  |
| A_23_P120594  | NM_032501       | ACSS1          | acyl-CoA synthetase short-chain family member 1            | ENST00000537502 | -0,568806119 |
| A_21_P0008672 | TCONS_00023504  | XLOC_011348    |                                                            |                 | -0,56896269  |
| A_23_P258340  | NM_021130       | PPIA           | peptidylprolyl isomerase A (cyclophilin A)                 | ENST00000419275 | -0,569007831 |
| A_23_P161698  | NM_002422       | MMP3           | matrix metallopeptidase 3 (stromelysin 1, progelatinase)   | ENST00000299855 | -0,569066975 |
| A_23_P258340  | NM_021130       | PPIA           | peptidylprolyl isomerase A (cyclophilin A)                 | ENST00000419275 | -0,569265837 |
| A_23_P97990   | NM_002775       | HTRA1          | HtrA serine peptidase 1                                    | ENST00000435263 | -0,569381285 |
| A_23_P107132  | NM_002903       | RCVRN          | recoverin                                                  | ENST00000226193 | -0,569385926 |
| A_21_P0001874 | ENST00000450944 | XLOC_001513    |                                                            | ENST00000450944 | -0,569465381 |
| A_23_P121545  | NM_201591       | GPM6A          | glycoprotein M6A                                           | ENST00000280187 | -0,569579629 |
| A_23_P123596  | NM_000170       | GLDC           | glycine dehydrogenase (decarboxylating)                    | ENST00000321612 | -0,569632097 |
| A_24_P181055  | NM_006278       | ST3GAL4        | ST3 beta-galactoside alpha-2,3-sialyltransferase 4         | ENST00000530591 | -0,569662052 |
| A_23_P67529   | NM_002250       | KCNN4          | potassium intermediate/small conductance calcium-activated | ENST00000407385 | -0,569816765 |
| A_21_P0012131 | AK309218        | XLOC_I2_008692 |                                                            |                 | -0,569966835 |
| A_33_P3329013 | NM_001050       | SSTR2          | somatostatin receptor 2                                    | ENST00000315332 | -0,570139478 |
| A_21_P0006148 | TCONS_00015989  | XLOC_007368    |                                                            |                 | -0,570158844 |



|               |                 |              |                                                                |                 |              |
|---------------|-----------------|--------------|----------------------------------------------------------------|-----------------|--------------|
| A_24_P71661   | NM_006371       | CRTAP        | cartilage associated protein                                   |                 | -0,57017132  |
| A_23_P127186  | NM_206862       | TACC2        | transforming, acidic coiled-coil containing protein 2          | ENST00000368997 | -0,570240227 |
| A_23_P103864  | NM_024525       | TTC13        | tetratricopeptide repeat domain 13                             | ENST00000414259 | -0,570404545 |
| A_24_P358054  | NR_003268       | CTAGE10P     | CTAGE family, member 10, pseudogene                            |                 | -0,570534067 |
| A_33_P3305851 | NM_016275       | SELT         | selenoprotein T                                                | ENST00000471696 | -0,570554068 |
| A_23_P103864  | NM_024525       | TTC13        | tetratricopeptide repeat domain 13                             | ENST00000414259 | -0,570590591 |
| A_23_P341567  | NM_178833       | SLC9B2       | solute carrier family 9, subfamily B (cation proton antiporte  | ENST00000339611 | -0,57081688  |
| A_33_P3420078 | ENST00000367368 | LRP11        | low density lipoprotein receptor-related protein 11            | ENST00000367368 | -0,570841907 |
| A_33_P3263538 | AF001893        | NEAT1        | nuclear paraspeckle assembly transcript 1 (non-protein coding) |                 | -0,570935624 |
| A_23_P170352  | NM_002949       | MRPL12       | mitochondrial ribosomal protein L12                            | ENST00000333676 | -0,571150951 |
| A_23_P92543   | NM_152540       | SCFD2        | sec1 family domain containing 2                                | ENST00000388940 | -0,571171705 |
| A_24_P388940  | NM_001042493    | C6orf162     | chromosome 6 open reading frame 162                            | ENST00000229570 | -0,571205676 |
| A_21_P0003552 | BC033535        | XLOC_004227  |                                                                | ENST00000514297 | -0,571246305 |
| A_21_P0010469 | BQ706985        | LOC100144603 | uncharacterized transcript                                     |                 | -0,571321261 |
| A_23_P11543   | NM_000147       | FUCA1        | fucosidase, alpha-L- 1, tissue                                 | ENST00000374479 | -0,571329961 |
| A_24_P36299   | NM_004491       | ARHGAP35     | Rho GTPase activating protein 35                               | ENST00000317082 | -0,571470817 |
| A_24_P31235   | NM_001970       | EIF5A        | eukaryotic translation initiation factor 5A                    | ENST00000355068 | -0,571494616 |
| A_33_P3418125 | NM_006851       | GLIPR1       | GLI pathogenesis-related 1                                     | ENST00000266659 | -0,571506218 |
| A_23_P116829  | NM_003348       | UBE2N        | ubiquitin-conjugating enzyme E2N                               | ENST00000318066 | -0,571591668 |
| A_23_P68031   | NM_003151       | STAT4        | signal transducer and activator of transcription 4             | ENST00000392320 | -0,571669393 |
| A_23_P143374  | NM_025176       | NINL         | ninein-like                                                    | ENST00000464285 | -0,571779137 |
| A_23_P503233  | NM_080738       | EDARADD      | EDAR-associated death domain                                   | ENST00000359362 | -0,571872578 |
| A_33_P3347168 | NM_005647       | TBL1X        | transducin (beta)-like 1X-linked                               | ENST00000407597 | -0,57193732  |
| A_33_P3424800 | NM_005514       | HLA-B        | major histocompatibility complex, class I, B                   | ENST00000481588 | -0,57196834  |
| A_23_P104741  | NM_032531       | KIRREL3      | kin of IRRE like 3 (Drosophila)                                | ENST00000525144 | -0,571993404 |
| A_23_P162211  | NM_018050       | MANSC1       | MANSC domain containing 1                                      | ENST00000535902 | -0,572106631 |
| A_23_P108492  | NM_138395       | MARS2        | methionyl-tRNA synthetase 2, mitochondrial                     | ENST00000499940 | -0,572580767 |
| A_32_P175739  | NM_000189       | HK2          | hexokinase 2                                                   | ENST00000290573 | -0,572590662 |
| A_23_P120860  | NM_003634       | NIPSNAP1     | nipsnap homolog 1 (C. elegans)                                 | ENST00000216121 | -0,572650025 |

|                |                 |                |                                                              |                 |              |
|----------------|-----------------|----------------|--------------------------------------------------------------|-----------------|--------------|
| A_23_P332789   | NM_000750       | CHRNB4         | cholinergic receptor, nicotinic, beta 4                      | ENST00000412074 | -0,572688372 |
| A_33_P3219090  | NM_005542       | INSIG1         | insulin induced gene 1                                       | ENST00000344756 | -0,572866737 |
| A_23_P346006   | NM_020739       | CCPG1          | cell cycle progression 1                                     | ENST00000425574 | -0,572891828 |
| A_32_P87013    | NM_000584       | IL8            | interleukin 8                                                | ENST00000307407 | -0,572994222 |
| A_33_P3215059  | NM_145080       | NSMCE1         | non-SMC element 1 homolog (S. cerevisiae)                    | ENST00000361439 | -0,573013075 |
| A_23_P109345   | NM_004339       | PTTG1IP        | pituitary tumor-transforming 1 interacting protein           | ENST00000330938 | -0,573019542 |
| A_21_P0004018  | ENST00000512650 | XLOC_004435    |                                                              | ENST00000512650 | -0,573033985 |
| A_23_P10518    | NM_016521       | TFDP3          | transcription factor Dp family, member 3                     | ENST00000310125 | -0,573052877 |
| A_33_P3355230  | NM_002287       | LAIR1          | leukocyte-associated immunoglobulin-like receptor 1          | ENST00000313038 | -0,57309071  |
| A_23_P113701   | NM_002607       | PDGFA          | platelet-derived growth factor alpha polypeptide             | ENST00000402802 | -0,57313739  |
| A_33_P3337599  | NM_006904       | PRKDC          | protein kinase, DNA-activated, catalytic polypeptide         | ENST00000518216 | -0,573238668 |
| A_23_P370786   | NM_175911       | OR2L13         | olfactory receptor, family 2, subfamily L, member 13         | ENST00000366478 | -0,573248614 |
| A_23_P145357   | NM_001188       | BAK1           | BCL2-antagonist/killer 1                                     | ENST00000442998 | -0,573347731 |
| A_24_P237936   | NM_175769       | TCF23          | transcription factor 23                                      | ENST00000296096 | -0,573379231 |
| A_23_P401547   | NM_015480       | PVRL3          | poliovirus receptor-related 3                                | ENST00000319792 | -0,573381139 |
| A_23_P379614   | NM_007280       | OIP5           | Opa interacting protein 5                                    | ENST00000220514 | -0,573477784 |
| A_24_P56837    | NM_080863       | ASB16          | ankyrin repeat and SOCS box containing 16                    | ENST00000293414 | -0,573488557 |
| A_21_P0011493  | BC160930        | XLOC_I2_005606 |                                                              |                 | -0,573532912 |
| A_33_P3440636  | AK091759        | LOC286071      | uncharacterized LOC286071                                    |                 | -0,573626871 |
| A_24_P386746   | NM_031491       | RBP5           | retinol binding protein 5, cellular                          | ENST00000543045 | -0,573638883 |
| A_33_P3387991  | NM_001805       | CEBPE          | CCAAT/enhancer binding protein (C/EBP), epsilon              | ENST00000206513 | -0,57385763  |
| A_24_P203106   | NM_002625       | PFKFB1         | 6-phosphofructo-2-kinase/fructose-2,6-biphosphatase 1        | ENST00000374992 | -0,57386374  |
| A_23_P201711   | NM_014624       | S100A6         | S100 calcium binding protein A6                              | ENST00000462776 | -0,573905808 |
| A_24_P941831   | NM_001044385    | TMEM237        | transmembrane protein 237                                    | ENST00000495329 | -0,573911511 |
| A_24_P322709   | NM_003098       | SNTA1          | syntrophin, alpha 1 (dystrophin-associated protein A1, 59kD) | ENST00000217381 | -0,573959186 |
| A_19_P00320288 | NM_018002       | OXR1           |                                                              | ENST00000531443 | -0,574055827 |
| A_21_P0003901  | ENST00000505454 | XLOC_004091    |                                                              | ENST00000505454 | -0,574182167 |
| A_21_P0002706  | ENST00000467198 | XLOC_002859    |                                                              | ENST00000467198 | -0,574247332 |
| A_23_P121253   | NM_003810       | TNFSF10        | tumor necrosis factor (ligand) superfamily, member 10        | ENST00000241261 | -0,574477492 |

|               |                  |                |                                                             |                 |              |
|---------------|------------------|----------------|-------------------------------------------------------------|-----------------|--------------|
| A_23_P127565  | NM_178834        | LAYN           | layilin                                                     | ENST00000375615 | -0,574604598 |
| A_23_P70213   | NM_000038        | APC            | adenomatous polyposis coli                                  | ENST00000508376 | -0,574722724 |
| A_21_P0003276 | TCONS_00007086   | XLOC_003007    |                                                             |                 | -0,574796463 |
| A_33_P3342663 | NM_153202        | ADAM33         | ADAM metallopeptidase domain 33                             | ENST00000322570 | -0,574806482 |
| A_23_P104996  | NM_004183        | BEST1          | bestrophin 1                                                | ENST00000524877 | -0,57486129  |
| A_23_P122724  | NM_004665        | VNN2           | vanin 2                                                     | ENST00000392389 | -0,574890986 |
| A_23_P416434  | NM_015288        | PHF15          | PHD finger protein 15                                       | ENST00000395003 | -0,574946187 |
| A_33_P3375368 | NM_001195381     | GPR35          | G protein-coupled receptor 35                               | ENST00000407714 | -0,574998204 |
| A_21_P0012685 | ENST00000511213  | XLOC_I2_011291 |                                                             | ENST00000511213 | -0,575004156 |
| A_21_P0014579 | XR_110373        | LOC100507175   | uncharacterized LOC100507175                                |                 | -0,575156526 |
| A_21_P0014872 | XR_132769        | LOC100505923   | uncharacterized LOC100505923                                |                 | -0,575179532 |
| A_23_P101093  | NM_016429        | COPZ2          | coatomer protein complex, subunit zeta 2                    | ENST00000006101 | -0,575212915 |
| A_23_P104996  | NM_004183        | BEST1          | bestrophin 1                                                | ENST00000524877 | -0,575330622 |
| A_23_P103511  | NM_001085375     | C1orf226       | chromosome 1 open reading frame 226                         | ENST00000458626 | -0,575365103 |
| A_23_P113553  | NM_001011544     | MAGEA11        | melanoma antigen family A, 11                               | ENST00000355220 | -0,575492601 |
| A_33_P3250068 | NM_014748        | SNX17          | sorting nexin 17                                            | ENST00000427123 | -0,575538692 |
| A_23_P47565   | NM_005566        | LDHA           | lactate dehydrogenase A                                     | ENST00000445376 | -0,575542981 |
| A_24_P100517  | NM_178448        | C9orf140       | chromosome 9 open reading frame 140                         | ENST00000409687 | -0,575598663 |
| A_23_P147605  | NM_001003676     | C11orf49       | chromosome 11 open reading frame 49                         | ENST00000278460 | -0,575623665 |
| A_23_P164405  | NM_033184        | KRTAP2-4       | keratin associated protein 2-4                              | ENST00000394015 | -0,575641159 |
| A_21_P0006009 | ENST00000422554  | XLOC_007350    |                                                             | ENST00000422554 | -0,575650806 |
| A_23_P115726  | NM_194298        | SLC16A9        | solute carrier family 16, member 9 (monocarboxylic acid tra | ENST00000395348 | -0,575714156 |
| A_33_P3286157 | NM_003327        | TNFRSF4        | tumor necrosis factor receptor superfamily, member 4        | ENST00000497869 | -0,576014052 |
| A_33_P3302586 | NM_207370        | GPR153         | G protein-coupled receptor 153                              | ENST00000377893 | -0,576024336 |
| A_23_P218597  | NM_002518        | NPAS2          | neuronal PAS domain protein 2                               | ENST00000474550 | -0,576097056 |
| A_33_P3260575 | NM_016174        | CERCAM         | cerebral endothelial cell adhesion molecule                 | ENST00000372842 | -0,576098007 |
| A_21_P0011915 | TCONS_I2_0001456 | XLOC_I2_008013 |                                                             |                 | -0,576229379 |
| A_33_P3328559 | NM_198517        | TBC1D10C       | TBC1 domain family, member 10C                              | ENST00000312390 | -0,576309171 |
| A_23_P255701  | NM_031294        | LRRC48         | leucine rich repeat containing 48                           | ENST00000411504 | -0,576309902 |

|                |                 |             |                                                             |                 |              |
|----------------|-----------------|-------------|-------------------------------------------------------------|-----------------|--------------|
| A_19_P00801945 | NR_015364       | LOC441204   | uncharacterized LOC441204                                   |                 | -0,576497867 |
| A_23_P104741   | NM_032531       | KIRREL3     | kin of IRRE like 3 (Drosophila)                             | ENST00000525144 | -0,576504646 |
| A_33_P3299285  | NM_001002901    | FCRLB       | Fc receptor-like B                                          | ENST00000336830 | -0,576701223 |
| A_23_P116557   | NM_009587       | LGALS9      | lectin, galactoside-binding, soluble, 9                     | ENST00000467111 | -0,576804451 |
| A_33_P3387856  | NM_001100625    | CENPN       | centromere protein N                                        | ENST00000393335 | -0,57680676  |
| A_24_P637982   | NM_198446       | C1orf122    | chromosome 1 open reading frame 122                         | ENST00000468084 | -0,576852228 |
| A_23_P66432    | NM_032646       | TTYH2       | tweety homolog 2 (Drosophila)                               | ENST00000441391 | -0,576900262 |
| A_21_P0013825  | NM_001164380    | STAU2       | staufen, RNA binding protein, homolog 2 (Drosophila)        | ENST00000518981 | -0,576913114 |
| A_23_P10506    | NM_014485       | HPGDS       | hematopoietic prostaglandin D synthase                      | ENST00000295256 | -0,577132301 |
| A_24_P149124   | NM_004772       | C5orf13     | chromosome 5 open reading frame 13                          | ENST00000446294 | -0,577152445 |
| A_32_P452655   | NM_001040078    | LGALS9C     | lectin, galactoside-binding, soluble, 9C                    | ENST00000423676 | -0,577274956 |
| A_23_P399501   | NM_182470       | PKM2        | pyruvate kinase, muscle                                     | ENST00000449901 | -0,57730923  |
| A_23_P152791   | NM_004694       | SLC16A6     | solute carrier family 16, member 6 (monocarboxylic acid tra | ENST00000327268 | -0,577399386 |
| A_23_P94754    | NM_005118       | TNFSF15     | tumor necrosis factor (ligand) superfamily, member 15       | ENST00000374044 | -0,577445996 |
| A_21_P0009908  | ENST00000431460 | XLOC_013787 |                                                             | ENST00000431460 | -0,57746719  |
| A_23_P47704    | NM_003355       | UCP2        | uncoupling protein 2 (mitochondrial, proton carrier)        | ENST00000310473 | -0,577577534 |
| A_23_P210886   | NM_138578       | BCL2L1      | BCL2-like 1                                                 | ENST00000420653 | -0,577606065 |
| A_23_P20196    | NM_005720       | ARPC1B      | actin related protein 2/3 complex, subunit 1B, 41kDa        | ENST00000484375 | -0,57764824  |
| A_23_P146444   | NM_003389       | CORO2A      | coronin, actin binding protein, 2A                          | ENST00000375077 | -0,577664619 |
| A_33_P3344399  | NM_001199017    | LRRC49      | leucine rich repeat containing 49                           | ENST00000436542 | -0,577717252 |
| A_21_P0010261  | THC2775863      | XLOC_013968 |                                                             |                 | -0,577740425 |
| A_23_P60627    | NM_001141       | ALOX15B     | arachidonate 15-lipoxygenase, type B                        | ENST00000380173 | -0,57775494  |
| A_23_P206359   | NM_004360       | CDH1        | cadherin 1, type 1, E-cadherin (epithelial)                 | ENST00000261769 | -0,577786423 |
| A_33_P3284933  | NM_145659       | IL27        | interleukin 27                                              | ENST00000356897 | -0,577884923 |
| A_23_P204947   | NM_004004       | GJB2        | gap junction protein, beta 2, 26kDa                         | ENST00000382844 | -0,577946379 |
| A_24_P45367    | NM_020448       | NIPAL3      | NIPA-like domain containing 3                               | ENST00000003912 | -0,578058006 |
| A_21_P0005568  | TCONS_00014163  | XLOC_006150 |                                                             |                 | -0,578076645 |
| A_23_P138507   | NM_001786       | CDK1        | cyclin-dependent kinase 1                                   | ENST00000448257 | -0,578176878 |
| A_21_P0010151  | ENST00000426609 | XLOC_013889 |                                                             | ENST00000426609 | -0,57818645  |

|               |              |              |                                                              |                 |              |
|---------------|--------------|--------------|--------------------------------------------------------------|-----------------|--------------|
| A_23_P344568  | NM_145019    | FAM124A      | family with sequence similarity 124A                         | ENST00000280057 | -0,578187507 |
| A_23_P10518   | NM_016521    | TFDP3        | transcription factor Dp family, member 3                     | ENST00000310125 | -0,578307879 |
| A_23_P138507  | NM_001786    | CDK1         | cyclin-dependent kinase 1                                    | ENST00000448257 | -0,578330046 |
| A_23_P428373  | NM_172239    | REXO1L1      | REX1, RNA exonuclease 1 homolog (S. cerevisiae)-like 1       | ENST00000379010 | -0,578407168 |
| A_21_P0013114 | AK125910     | LPAL2        | lipoprotein, Lp(a)-like 2, pseudogene                        |                 | -0,578502096 |
| A_33_P3247599 | NM_001023563 | ZNF805       | zinc finger protein 805                                      | ENST00000414468 | -0,57853618  |
| A_23_P11543   | NM_000147    | FUCA1        | fucosidase, alpha-L- 1, tissue                               | ENST00000374479 | -0,578579739 |
| A_24_P403417  | NM_004878    | PTGES        | prostaglandin E synthase                                     | ENST00000481476 | -0,5786955   |
| A_23_P138507  | NM_001786    | CDK1         | cyclin-dependent kinase 1                                    | ENST00000448257 | -0,578721686 |
| A_23_P35066   | NM_015976    | SNX7         | sorting nexin 7                                              | ENST00000370189 | -0,578752038 |
| A_24_P384029  | XR_132490    | LOC100130171 | hematological and neurological expressed 1 pseudogene        |                 | -0,578757867 |
| A_23_P49499   | NM_006456    | ST6GALNAC2   | ST6 (alpha-N-acetyl-neuraminyl-2,3-beta-galactosyl-1,3)-N-:  | ENST00000225276 | -0,578798823 |
| A_33_P3422471 | XM_003403636 | LOC100506255 | uncharacterized protein LOC100506255                         |                 | -0,578851958 |
| A_33_P3411628 | NM_000077    | CDKN2A       | cyclin-dependent kinase inhibitor 2A (melanoma, p16, inhib   | ENST00000380150 | -0,578961693 |
| A_33_P3296372 | NM_020365    | EIF2B3       | eukaryotic translation initiation factor 2B, subunit 3 gamma | ENST00000360403 | -0,579016757 |
| A_33_P3259053 | NM_001135750 | PSMG4        | proteasome (prosome, macropain) assembly chaperone 4         | ENST00000473000 | -0,579034481 |
| A_24_P353794  | NM_004481    | GALNT2       | UDP-N-acetyl-alpha-D-galactosamine:polypeptide N-acetylgl    | ENST00000485438 | -0,579035977 |
| A_23_P114952  | NM_016456    | TMEM9        | transmembrane protein 9                                      | ENST00000472411 | -0,579133074 |
| A_23_P108751  | NM_001039492 | FHL2         | four and a half LIM domains 2                                | ENST00000358129 | -0,579281705 |
| A_33_P3328772 | NM_001190860 | PLEKHA5      | pleckstrin homology domain containing, family A member 5     | ENST00000540972 | -0,579610904 |
| A_23_P210886  | NM_138578    | BCL2L1       | BCL2-like 1                                                  | ENST00000420653 | -0,579613261 |
| A_21_P0008559 | BC104435     | LOC145837    | uncharacterized LOC145837                                    |                 | -0,579647137 |
| A_23_P110941  | NM_001512    | GSTA4        | glutathione S-transferase alpha 4                            | ENST00000370960 | -0,579720222 |
| A_33_P3289865 | NM_006226    | PLCL1        | phospholipase C-like 1                                       | ENST00000437704 | -0,579776136 |
| A_33_P3396527 | NM_006467    | POLR3G       | polymerase (RNA) III (DNA directed) polypeptide G (32kD)     | ENST00000399107 | -0,579919829 |
| A_23_P90933   | NM_080876    | DUSP19       | dual specificity phosphatase 19                              | ENST00000342619 | -0,579998446 |
| A_21_P0014356 | XR_109436    | LOC100507425 | uncharacterized LOC100507425                                 |                 | -0,580204473 |
| A_23_P116829  | NM_003348    | UBE2N        | ubiquitin-conjugating enzyme E2N                             | ENST00000318066 | -0,580217539 |
| A_23_P204947  | NM_004004    | GJB2         | gap junction protein, beta 2, 26kDa                          | ENST00000382844 | -0,580245835 |



|                |                  |                |                                                                    |                 |              |
|----------------|------------------|----------------|--------------------------------------------------------------------|-----------------|--------------|
| A_19_P00322264 | ENST00000514050  | XLOC_I2_011173 |                                                                    | ENST00000514050 | -0,580315616 |
| A_33_P3389942  | NM_017838        | NHP2           | NHP2 ribonucleoprotein homolog (yeast)                             | ENST00000274606 | -0,580317525 |
| A_19_P00808794 | TCONS_I2_0001484 | XLOC_I2_008221 |                                                                    |                 | -0,580364111 |
| A_21_P0008772  | BX116292         | XLOC_011565    |                                                                    |                 | -0,58038207  |
| A_23_P10305    | NM_175859        | CTPS2          | CTP synthase II                                                    | ENST00000380207 | -0,580400832 |
| A_23_P4536     | NM_012307        | EPB41L3        | erythrocyte membrane protein band 4.1-like 3                       | ENST00000542146 | -0,580413774 |
| A_23_P62227    | NM_025159        | CXorf21        | chromosome X open reading frame 21                                 | ENST00000378962 | -0,580495012 |
| A_24_P309521   | NM_000890        | KCNJ5          | potassium inwardly-rectifying channel, subfamily J, member         | ENST00000529694 | -0,580630998 |
| A_33_P3230951  | NR_024059        | MIMT1          | MER1 repeat containing imprinted transcript 1 (non-protein coding) |                 | -0,580715204 |
| A_23_P135769   | NM_001101        | ACTB           | actin, beta                                                        | ENST00000445914 | -0,580726675 |
| A_23_P104996   | NM_004183        | BEST1          | bestrophin 1                                                       | ENST00000524877 | -0,580868819 |
| A_23_P411296   | NM_005194        | CEBPB          | CCAAT/enhancer binding protein (C/EBP), beta                       | ENST00000303004 | -0,58088534  |
| A_23_P120931   | NM_014508        | APOBEC3C       | apolipoprotein B mRNA editing enzyme, catalytic polypeptide        | ENST00000361441 | -0,580958815 |
| A_23_P168288   | NM_052962        | IL22RA2        | interleukin 22 receptor, alpha 2                                   | ENST00000296980 | -0,580993711 |
| A_23_P419213   | NM_020817        | KIAA1407       | KIAA1407                                                           | ENST00000295878 | -0,581046272 |
| A_23_P206806   | NM_002209        | ITGAL          | integrin, alpha L (antigen CD11A (p180), lymphocyte function       | ENST00000356798 | -0,581055014 |
| A_21_P0004454  | TCONS_00010521   | XLOC_005041    |                                                                    |                 | -0,581218512 |
| A_23_P122077   | NM_016591        | GCNT4          | glucosaminyl (N-acetyl) transferase 4, core 2                      | ENST00000322348 | -0,581221102 |
| A_21_P0008943  | TCONS_00024412   | XLOC_011724    |                                                                    |                 | -0,581230403 |
| A_23_P121253   | NM_003810        | TNFSF10        | tumor necrosis factor (ligand) superfamily, member 10              | ENST00000241261 | -0,581240972 |
| A_23_P11543    | NM_000147        | FUCA1          | fucosidase, alpha-L- 1, tissue                                     | ENST00000374479 | -0,581253368 |
| A_33_P3318746  | ENST00000366856  | CNIH4          | cornichon homolog 4 (Drosophila)                                   | ENST00000366856 | -0,58134508  |
| A_21_P0011132  | TCONS_I2_0000675 | XLOC_I2_003647 |                                                                    |                 | -0,581575739 |
| A_23_P138541   | NM_003739        | AKR1C3         | aldo-keto reductase family 1, member C3 (3-alpha hydroxys          | ENST00000439082 | -0,581611362 |
| A_23_P330262   | NM_012398        | PIP5K1C        | phosphatidylinositol-4-phosphate 5-kinase, type I, gamma           | ENST00000335312 | -0,5816747   |
| A_24_P228667   | NM_003776        | MRPL40         | mitochondrial ribosomal protein L40                                | ENST00000443660 | -0,581823502 |
| A_23_P411296   | NM_005194        | CEBPB          | CCAAT/enhancer binding protein (C/EBP), beta                       | ENST00000303004 | -0,581824254 |
| A_23_P109345   | NM_004339        | PTTG1IP        | pituitary tumor-transforming 1 interacting protein                 | ENST00000330938 | -0,58184414  |
| A_33_P3309289  | AK021929         | ST3GAL4        | ST3 beta-galactoside alpha-2,3-sialyltransferase 4                 |                 | -0,581869917 |

|                |                  |                |                                                               |                 |              |
|----------------|------------------|----------------|---------------------------------------------------------------|-----------------|--------------|
| A_23_P109345   | NM_004339        | PTTG1IP        | pituitary tumor-transforming 1 interacting protein            | ENST00000330938 | -0,58192945  |
| A_23_P345118   | NM_002648        | PIM1           | pim-1 oncogene                                                | ENST00000373509 | -0,581935523 |
| A_23_P122068   | NM_181435        | C1QTNF3        | C1q and tumor necrosis factor related protein 3               | ENST00000513471 | -0,581968679 |
| A_33_P3215768  | NM_007210        | GALNT6         | UDP-N-acetyl-alpha-D-galactosamine:polypeptide N-acetylgl     | ENST00000356317 | -0,581986777 |
| A_23_P111311   | NM_144497        | AKAP12         | A kinase (PRKA) anchor protein 12                             | ENST00000253332 | -0,582039789 |
| A_21_P0012568  | NM_030930        | UNC93B1        | unc-93 homolog B1 (C. elegans)                                | ENST00000525262 | -0,582093532 |
| A_32_P134290   | NM_017742        | ZCCHC2         | zinc finger, CCHC domain containing 2                         | ENST00000269499 | -0,58220587  |
| A_23_P145238   | NM_080593        | HIST1H2BK      | histone cluster 1, H2bk                                       | ENST00000396891 | -0,582222913 |
| A_24_P115700   | NM_078470        | COX15          | COX15 homolog, cytochrome c oxidase assembly protein (y       | ENST00000370483 | -0,58239401  |
| A_21_P0012597  | TCONS_I2_0002059 | XLOC_I2_010724 |                                                               |                 | -0,582453465 |
| A_23_P11543    | NM_000147        | FUCA1          | fucosidase, alpha-L- 1, tissue                                | ENST00000374479 | -0,582462162 |
| A_21_P0004692  | ENST00000417800  | XLOC_005480    |                                                               | ENST00000417800 | -0,582546889 |
| A_23_P110184   | NM_006745        | MSMO1          | methylsterol monooxygenase 1                                  | ENST00000393766 | -0,582628637 |
| A_23_P25194    | NM_003806        | HRK            | harakiri, BCL2 interacting protein (contains only BH3 domain) | ENST00000257572 | -0,582638478 |
| A_23_P116264   | NM_006176        | NRGN           | neurogranin (protein kinase C substrate, RC3)                 | ENST00000284292 | -0,582645535 |
| A_23_P78871    | NM_024076        | KCTD15         | potassium channel tetramerisation domain containing 15        | ENST00000413790 | -0,582708927 |
| A_24_P153511   | NM_020841        | OSBPL8         | oxysterol binding protein-like 8                              | ENST00000446075 | -0,582729172 |
| A_33_P3247205  | NM_022746        | Mar-01         | mitochondrial amidoxime reducing component 1                  | ENST00000366910 | -0,582783077 |
| A_24_P133162   | NM_178122        | C1orf201       | chromosome 1 open reading frame 201                           | ENST00000337248 | -0,582815412 |
| A_21_P0001231  | ENST00000437416  | XLOC_001228    |                                                               | ENST00000437416 | -0,582831913 |
| A_23_P114466   | NM_033284        | TBL1Y          | transducin (beta)-like 1, Y-linked                            | ENST00000383032 | -0,582920819 |
| A_23_P124044   | NM_021008        | DEAF1          | deformed epidermal autoregulatory factor 1 (Drosophila)       | ENST00000527658 | -0,582942776 |
| A_33_P3318122  | NM_020314        | C16orf62       | chromosome 16 open reading frame 62                           | ENST00000251143 | -0,582995745 |
| A_23_P110184   | NM_006745        | MSMO1          | methylsterol monooxygenase 1                                  | ENST00000393766 | -0,583041169 |
| A_23_P102471   | NM_000251        | MSH2           | mutS homolog 2, colon cancer, nonpolyposis type 1 (E. coli)   | ENST00000543555 | -0,583161342 |
| A_23_P211522   | NM_145738        | SYNGR1         | synaptogyrin 1                                                | ENST00000318801 | -0,583271494 |
| A_33_P3363260  | NM_173582        | PGM2L1         | phosphoglucomutase 2-like 1                                   | ENST00000298198 | -0,583352574 |
| A_23_P29773    | NM_014398        | LAMP3          | lysosomal-associated membrane protein 3                       | ENST00000265598 | -0,583364912 |
| A_19_P00322904 | NM_173463        | CCDC149        | coiled-coil domain containing 149                             | ENST00000505471 | -0,583574506 |

|               |                  |                |                                                                 |                 |              |
|---------------|------------------|----------------|-----------------------------------------------------------------|-----------------|--------------|
| A_23_P165090  | NM_024407        | NDUFS7         | NADH dehydrogenase (ubiquinone) Fe-S protein 7, 20kDa (†        | ENST00000534853 | -0,583596611 |
| A_21_P0011951 | TCONS_I2_0001479 | XLOC_I2_008203 |                                                                 |                 | -0,583628649 |
| A_33_P3403429 | NM_001129890     | LRRC69         | leucine rich repeat containing 69                               | ENST00000520099 | -0,583705731 |
| A_23_P250122  | NM_020223        | FAM20C         | family with sequence similarity 20, member C                    | ENST00000313766 | -0,583959346 |
| A_23_P319617  | NM_019886        | CHST7          | carbohydrate (N-acetylglucosamine 6-O) sulfotransferase 7       | ENST00000276055 | -0,583973946 |
| A_23_P110184  | NM_006745        | MSMO1          | methylsterol monooxygenase 1                                    | ENST00000393766 | -0,584077756 |
| A_24_P343095  | NM_000791        | DHFR           | dihydrofolate reductase                                         | ENST00000513048 | -0,584139219 |
| A_33_P3364180 | NM_152536        | FGD5           | FYVE, RhoGEF and PH domain containing 5                         | ENST00000285046 | -0,584261786 |
| A_23_P213718  | NM_014402        | UQCRCQ         | ubiquinol-cytochrome c reductase, complex III subunit VII, 9    | ENST00000378665 | -0,584338931 |
| A_21_P0014099 | XR_108428        | LOC100507554   | uncharacterized LOC100507554                                    | ENST00000438978 | -0,584540959 |
| A_23_P155514  | NM_001622        | AHSG           | alpha-2-HS-glycoprotein                                         | ENST00000541510 | -0,584729795 |
| A_23_P90626   | NM_004288        | CYTIP          | cytohesin 1 interacting protein                                 | ENST00000540637 | -0,58473627  |
| A_23_P135271  | NM_001497        | B4GALT1        | UDP-Gal:betaGlcNAc beta 1,4- galactosyltransferase, polypeptide | ENST00000379731 | -0,584891721 |
| A_24_P296808  | NM_018215        | PNMAL1         | PNMA-like 1                                                     | ENST00000313683 | -0,584934166 |
| A_33_P3369760 | NM_022343        | GLIPR2         | GLI pathogenesis-related 2                                      | ENST00000377959 | -0,584963189 |
| A_33_P3269723 | NM_001042697     | ZSWIM7         | zinc finger, SWIM-type containing 7                             | ENST00000399277 | -0,584992129 |
| A_23_P116512  | NM_024841        | PRR5L          | proline rich 5 like                                             | ENST00000389693 | -0,585023565 |
| A_33_P3655775 | AK096384         | LOC284630      | uncharacterized LOC284630                                       |                 | -0,585150028 |
| A_21_P0014379 | XR_109516        | LOC100507372   | uncharacterized LOC100507372                                    |                 | -0,585164629 |
| A_23_P100141  | NM_023076        | UNKL           | unkempt homolog (Drosophila)-like                               | ENST00000397464 | -0,585304824 |
| A_23_P411296  | NM_005194        | CEBPB          | CCAAT/enhancer binding protein (C/EBP), beta                    | ENST00000303004 | -0,58535644  |
| A_23_P209731  | NM_025139        | ARMC9          | armadillo repeat containing 9                                   | ENST00000486787 | -0,585462145 |
| A_21_P0007770 | ENST00000321694  | VSIG10         | V-set and immunoglobulin domain containing 10                   | ENST00000321694 | -0,585510333 |
| A_21_P0005391 | TCONS_00013490   | XLOC_006133    |                                                                 |                 | -0,585571868 |
| A_21_P0006669 | ENST00000434552  | XLOC_008447    |                                                                 | ENST00000434552 | -0,585629932 |
| A_21_P0008045 | TCONS_00021747   | XLOC_010339    |                                                                 |                 | -0,585640855 |
| A_23_P113393  | NM_017413        | APLN           | apelin                                                          | ENST00000307484 | -0,585722122 |
| A_23_P140821  | NM_016948        | PARD6A         | par-6 partitioning defective 6 homolog alpha (C. elegans)       | ENST00000219255 | -0,585781134 |
| A_23_P253123  | NM_016267        | VGLL1          | vestigial like 1 (Drosophila)                                   | ENST00000430688 | -0,585906662 |

|               |                                  |              |                                                          |                 |              |
|---------------|----------------------------------|--------------|----------------------------------------------------------|-----------------|--------------|
| A_33_P3376321 | NM_020477                        | ANK1         | ankyrin 1, erythrocytic                                  | ENST00000358820 | -0,585935196 |
| A_21_P0014210 | XR_108871                        | LOC100506689 | uncharacterized LOC100506689                             |                 | -0,585946095 |
| A_24_P215765  | NM_024490                        | ATP10A       | ATPase, class V, type 10A                                | ENST00000555815 | -0,586305564 |
| A_23_P306987  | NM_031439                        | SOX7         | SRY (sex determining region Y)-box 7                     | ENST00000304501 | -0,586401157 |
| A_33_P3424803 | M26429                           | HLA-C        | major histocompatibility complex, class I, C             |                 | -0,586550741 |
| A_23_P217737  | NM_000052                        | ATP7A        | ATPase, Cu <sup>++</sup> transporting, alpha polypeptide | ENST00000341514 | -0,586555308 |
| A_24_P74064   | NM_003409                        | ZFP161       | zinc finger protein 161 homolog (mouse)                  | ENST00000400143 | -0,586557361 |
| A_33_P3290562 | NM_000168                        | GLI3         | GLI family zinc finger 3                                 | ENST00000395925 | -0,586574832 |
| A_23_P77401   | NM_018340                        | CPPED1       | calcineurin-like phosphoesterase domain containing 1     | ENST00000433677 | -0,586602036 |
| A_23_P62642   | NM_012337                        | CCDC19       | coiled-coil domain containing 19                         | ENST00000475911 | -0,586886975 |
| A_33_P3270800 | NM_001129885                     | CPSF4L       | cleavage and polyadenylation specific factor 4-like      | ENST00000344935 | -0,586890979 |
| A_33_P3321034 | NM_020911                        | PLXNA4       | plexin A4                                                | ENST00000496550 | -0,586896066 |
| A_24_P205589  | NM_007274                        | ACOT7        | acyl-CoA thioesterase 7                                  | ENST00000481175 | -0,586929657 |
| A_33_P3372451 | NM_199184                        | C6orf108     | chromosome 6 open reading frame 108                      | ENST00000230431 | -0,58694362  |
| A_23_P37910   | NM_002746                        | MAPK3        | mitogen-activated protein kinase 3                       | ENST00000395202 | -0,586997086 |
| A_24_P208909  | NM_015271                        | TRIM2        | tripartite motif containing 2                            | ENST00000338700 | -0,587057277 |
| A_32_P41065   | NM_001017395                     | TMCC1        | transmembrane and coiled-coil domain family 1            | ENST00000426664 | -0,587059338 |
| A_21_P0010634 | TCONS_I2_0000139: XLOC_I2_001011 |              |                                                          |                 | -0,587219115 |
| A_21_P0011017 | TCONS_I2_0000518: XLOC_I2_002767 |              |                                                          |                 | -0,587401737 |
| A_23_P411296  | NM_005194                        | CEBPB        | CCAAT/enhancer binding protein (C/EBP), beta             | ENST00000303004 | -0,58741672  |
| A_23_P115872  | NM_018131                        | CEP55        | centrosomal protein 55kDa                                | ENST00000371485 | -0,587423339 |
| A_23_P120002  | NM_004510                        | SP110        | SP110 nuclear body protein                               | ENST00000338556 | -0,587598692 |
| A_33_P3320062 | NM_002662                        | PLD1         | phospholipase D1, phosphatidylcholine-specific           | ENST00000340989 | -0,587603521 |
| A_23_P325155  | NM_138939                        | CD200R1      | CD200 receptor 1                                         | ENST00000440122 | -0,587633359 |
| A_32_P118250  | NR_023921                        | C14orf167    | chromosome 14 open reading frame 167                     | ENST00000556379 | -0,587715424 |
| A_23_P99661   | NM_018071                        | ARHGEF40     | Rho guanine nucleotide exchange factor (GEF) 40          | ENST00000553709 | -0,587757558 |
| A_23_P69154   | NM_001129908                     | FAM198A      | family with sequence similarity 198, member A            | ENST00000430121 | -0,587776679 |
| A_23_P122796  | NM_016063                        | HDDC2        | HD domain containing 2                                   | ENST00000398153 | -0,587929399 |
| A_23_P118     | NM_001439                        | EXTL2        | exostoses (multiple)-like 2                              | ENST00000370114 | -0,588001596 |

|                |                 |              |                                                                               |                 |              |
|----------------|-----------------|--------------|-------------------------------------------------------------------------------|-----------------|--------------|
| A_23_P259442   | NM_001873       | CPE          | carboxypeptidase E                                                            | ENST00000261510 | -0,588065776 |
| A_23_P120931   | NM_014508       | APOBEC3C     | apolipoprotein B mRNA editing enzyme, catalytic polypeptide-like 3C           | ENST00000361441 | -0,588215498 |
| A_23_P110253   | NM_000222       | KIT          | v-kit Hardy-Zuckerman 4 feline sarcoma viral oncogene homolog                 | ENST00000288135 | -0,588267472 |
| A_21_P0008842  | TCONS_00024034  | XLOC_011397  |                                                                               |                 | -0,588286652 |
| A_33_P3249574  | NM_004866       | SCAMP1       | secretory carrier membrane protein 1                                          | ENST00000538629 | -0,588541224 |
| A_21_P0014116  | ENST00000503006 | LOC100507134 |                                                                               | ENST00000503006 | -0,588572248 |
| A_23_P113701   | NM_002607       | PDGFA        | platelet-derived growth factor alpha polypeptide                              | ENST00000402802 | -0,588657211 |
| A_23_P103864   | NM_024525       | TTC13        | tetratricopeptide repeat domain 13                                            | ENST00000414259 | -0,588774929 |
| A_23_P137765   | NM_000437       | PAFAH2       | platelet-activating factor acetylhydrolase 2, 40kDa                           | ENST00000374284 | -0,588782681 |
| A_23_P135769   | NM_001101       | ACTB         | actin, beta                                                                   | ENST00000445914 | -0,588850015 |
| A_33_P3366175  | NR_034003       | LOC100130298 | hCG1816373-like                                                               | ENST00000525556 | -0,588951285 |
| A_23_P114095   | NM_015884       | MBTPS2       | membrane-bound transcription factor peptidase, site 2                         | ENST00000379484 | -0,589025545 |
| A_23_P204947   | NM_004004       | GJB2         | gap junction protein, beta 2, 26kDa                                           | ENST00000382844 | -0,58909208  |
| A_23_P73493    | NM_004344       | CETN2        | centrin, EF-hand protein, 2                                                   | ENST00000370277 | -0,589126657 |
| A_33_P3368188  | NM_006640       | Sep-09       | septin 9                                                                      | ENST00000397613 | -0,589146653 |
| A_23_P321703   | NM_004049       | BCL2A1       | BCL2-related protein A1                                                       | ENST00000485386 | -0,589213538 |
| A_23_P85180    | NM_003492       | TMEM187      | transmembrane protein 187                                                     | ENST00000369982 | -0,589233633 |
| A_33_P3414912  | NM_001200056    | NPL          | N-acetylneuraminatase pyruvate lyase (dihydrodipicolinate synthase)           | ENST00000258317 | -0,589258507 |
| A_21_P0002660  | TCONS_00005139  | XLOC_002079  |                                                                               |                 | -0,589462044 |
| A_33_P3286859  | NM_016529       | ATP8A2       | ATPase, aminophospholipid transporter, class I, type 8A, member 2             | ENST00000255283 | -0,589463646 |
| A_23_P24104    | NM_002658       | PLAU         | plasminogen activator, urokinase                                              | ENST00000496777 | -0,589472789 |
| A_33_P3332150  | NM_203454       | APOBEC4      | apolipoprotein B mRNA editing enzyme, catalytic polypeptide-like 4 (putative) |                 | -0,589545719 |
| A_19_P00320274 | NR_024431       | LOC283050    | uncharacterized LOC283050                                                     |                 | -0,589587176 |
| A_32_P89310    | NM_001080475    | PLEKHM3      | pleckstrin homology domain containing, family M, member 3                     | ENST00000343987 | -0,589723567 |
| A_24_P915806   | NM_001024074    | HNMT         | histamine N-methyltransferase                                                 | ENST00000280096 | -0,589805141 |
| A_23_P411296   | NM_005194       | CEBPB        | CCAAT/enhancer binding protein (C/EBP), beta                                  | ENST00000303004 | -0,589926929 |
| A_23_P392429   | NM_145756       | ZNF396       | zinc finger protein 396                                                       | ENST00000306346 | -0,589935407 |
| A_23_P12082    | NM_001025199    | CHI3L2       | chitinase 3-like 2                                                            | ENST00000369748 | -0,589937284 |
| A_21_P0000662  | NR_036537       | LOC100131320 | uncharacterized LOC100131320                                                  | ENST00000412425 | -0,589995396 |



|               |                 |              |                                                                |                 |              |
|---------------|-----------------|--------------|----------------------------------------------------------------|-----------------|--------------|
| A_23_P369666  | ENST00000468376 | ZMYND8       | zinc finger, MYND-type containing 8                            | ENST00000468376 | -0,590002798 |
| A_23_P113701  | NM_002607       | PDGFA        | platelet-derived growth factor alpha polypeptide               | ENST00000402802 | -0,590022069 |
| A_21_P0000576 | NR_029376       | LOC100294362 | uncharacterized LOC100294362                                   |                 | -0,590052354 |
| A_23_P120860  | NM_003634       | NIPSNAP1     | nipsnap homolog 1 (C. elegans)                                 | ENST00000216121 | -0,590054717 |
| A_23_P138507  | NM_001786       | CDK1         | cyclin-dependent kinase 1                                      | ENST00000448257 | -0,590120853 |
| A_23_P110005  | NM_032316       | NICN1        | nicolin 1                                                      | ENST00000430622 | -0,590188936 |
| A_24_P181672  | NM_001009905    | B3GNTL1      | UDP-GlcNAc:betaGal beta-1,3-N-acetylglucosaminyltransferase    | ENST00000320865 | -0,590267928 |
| A_33_P3350207 | NM_017885       | HCFC1R1      | host cell factor C1 regulator 1 (XPO1 dependent)               | ENST00000248089 | -0,590308241 |
| A_24_P355649  | NM_002017       | FLI1         | Friend leukemia virus integration 1                            | ENST00000528790 | -0,590390503 |
| A_23_P109345  | NM_004339       | PTTG1IP      | pituitary tumor-transforming 1 interacting protein             | ENST00000330938 | -0,59047072  |
| A_24_P396375  | NM_001113347    | ECE1         | endothelin converting enzyme 1                                 | ENST00000415912 | -0,590636932 |
| A_23_P122052  | NM_001008397    | GPX8         | glutathione peroxidase 8 (putative)                            | ENST00000503787 | -0,59063788  |
| A_21_P0006368 | TCONS_00016676  | XLOC_007537  |                                                                |                 | -0,590667548 |
| A_23_P411296  | NM_005194       | CEBPB        | CCAAT/enhancer binding protein (C/EBP), beta                   | ENST00000303004 | -0,590690046 |
| A_23_P216501  | NM_213674       | TPM2         | tropomyosin 2 (beta)                                           | ENST00000329305 | -0,591011407 |
| A_24_P399888  | NM_001002876    | CENPM        | centromere protein M                                           | ENST00000396437 | -0,59103728  |
| A_33_P3410724 | NM_003001       | SDHC         | succinate dehydrogenase complex, subunit C, integral mem       | ENST00000513700 | -0,591108222 |
| A_23_P412321  | NM_000579       | CCR5         | chemokine (C-C motif) receptor 5                               | ENST00000343801 | -0,591216738 |
| A_21_P0010978 | AF001893        | NEAT1        | nuclear paraspeckle assembly transcript 1 (non-protein coding) |                 | -0,591236782 |
| A_21_P0001158 | ENST00000435311 | XLOC_000930  |                                                                | ENST00000435311 | -0,591276851 |
| A_33_P3844650 | NM_012098       | ANGPTL2      | angiopoietin-like 2                                            | ENST00000373417 | -0,591328332 |
| A_23_P320862  | NM_152786       | C9orf43      | chromosome 9 open reading frame 43                             | ENST00000288462 | -0,591442526 |
| A_23_P35205   | NM_013441       | RCAN3        | RCAN family member 3                                           | ENST00000374395 | -0,591643967 |
| A_21_P0004792 | ENST00000417654 | XLOC_005881  |                                                                | ENST00000417654 | -0,591807739 |
| A_24_P219114  | NM_005065       | SEL1L        | sel-1 suppressor of lin-12-like (C. elegans)                   | ENST00000336735 | -0,591921931 |
| A_23_P120316  | NM_006636       | MTHFD2       | methylenetetrahydrofolate dehydrogenase (NADP+ depend          | ENST00000394053 | -0,592056046 |
| A_32_P119197  | NM_001043352    | TPM3         | tropomyosin 3                                                  | ENST00000368533 | -0,59214728  |
| A_32_P133840  | NM_014858       | TMCC2        | transmembrane and coiled-coil domain family 2                  | ENST00000358024 | -0,592179714 |
| A_23_P1331    | NM_080801       | COL13A1      | collagen, type XIII, alpha 1                                   | ENST00000478219 | -0,592182639 |

|               |                 |                |                                                               |                 |              |
|---------------|-----------------|----------------|---------------------------------------------------------------|-----------------|--------------|
| A_33_P3242503 | NM_199451       | ZNF365         | zinc finger protein 365                                       | ENST00000410046 | -0,592189308 |
| A_23_P401084  | NM_174945       | ZNF575         | zinc finger protein 575                                       | ENST00000458714 | -0,592295454 |
| A_23_P91487   | NM_016940       | RWDD2B         | RWD domain containing 2B                                      | ENST00000486719 | -0,592305009 |
| A_23_P103864  | NM_024525       | TTC13          | tetratricopeptide repeat domain 13                            | ENST00000414259 | -0,592331061 |
| A_23_P121253  | NM_003810       | TNFSF10        | tumor necrosis factor (ligand) superfamily, member 10         | ENST00000241261 | -0,59234746  |
| A_24_P142118  | NM_003246       | THBS1          | thrombospondin 1                                              | ENST00000260356 | -0,592421318 |
| A_33_P3256738 | NM_032818       | C9orf100       | chromosome 9 open reading frame 100                           | ENST00000468876 | -0,592658803 |
| A_23_P109345  | NM_004339       | PTTG1IP        | pituitary tumor-transforming 1 interacting protein            | ENST00000330938 | -0,592756577 |
| A_21_P0010542 | ENST00000451023 | XLOC_I2_000342 |                                                               | ENST00000451023 | -0,592827037 |
| A_33_P3323842 | NR_002832       | BDNF-AS1       | BDNF antisense RNA 1 (non-protein coding)                     |                 | -0,592927588 |
| A_23_P109345  | NM_004339       | PTTG1IP        | pituitary tumor-transforming 1 interacting protein            | ENST00000330938 | -0,592972729 |
| A_23_P130856  | NM_032816       | CEP89          | centrosomal protein 89kDa                                     | ENST00000305768 | -0,592998512 |
| A_23_P118025  | NM_022355       | DPEP2          | dipeptidase 2                                                 | ENST00000412757 | -0,593086491 |
| A_33_P3318509 | NM_014358       | CLEC4E         | C-type lectin domain family 4, member E                       | ENST00000299663 | -0,593240662 |
| A_21_P0013122 | BC039678        | XLOC_I2_012378 |                                                               |                 | -0,593287315 |
| A_24_P595717  | NM_199280       | FAM179A        | family with sequence similarity 179, member A                 | ENST00000475900 | -0,593294824 |
| A_24_P295590  | NM_032023       | RASSF4         | Ras association (RalGDS/AF-6) domain family member 4          | ENST00000489171 | -0,593307512 |
| A_24_P296508  | NM_152346       | SLC43A2        | solute carrier family 43, member 2                            | ENST00000382147 | -0,593349368 |
| A_24_P370172  | NM_181879       | LILRA5         | leukocyte immunoglobulin-like receptor, subfamily A (with     | ENST00000432233 | -0,593398378 |
| A_23_P122976  | NM_002069       | GNAI1          | guanine nucleotide binding protein (G protein), alpha inhibi  | ENST00000351004 | -0,593418284 |
| A_23_P83028   | NM_021111       | RECK           | reversion-inducing-cysteine-rich protein with kazal motifs    | ENST00000377966 | -0,593421826 |
| A_21_P0011496 | NM_001025195    | CES1           | carboxylesterase 1                                            | ENST00000360526 | -0,593452875 |
| A_23_P411296  | NM_005194       | CEBPB          | CCAAT/enhancer binding protein (C/EBP), beta                  | ENST00000303004 | -0,593475399 |
| A_23_P132277  | NM_006739       | MCM5           | minichromosome maintenance complex component 5                | ENST00000455261 | -0,593729869 |
| A_21_P0003821 | TCONS_00008716  | XLOC_004229    |                                                               |                 | -0,593843906 |
| A_33_P3326617 | NM_001018104    | FAHD1          | fumarylacetoacetate hydrolase domain containing 1             | ENST00000382666 | -0,593915437 |
| A_23_P407206  | NM_018941       | CLN8           | ceroid-lipofuscinosis, neuronal 8 (epilepsy, progressive with | ENST00000331222 | -0,593923187 |
| A_24_P237270  | NM_000675       | ADORA2A        | adenosine A2a receptor                                        | ENST00000417596 | -0,594087414 |
| A_23_P61551   | NM_006110       | CD2BP2         | CD2 (cytoplasmic tail) binding protein 2                      | ENST00000305596 | -0,594129172 |

|                |                 |             |                                                          |                 |              |
|----------------|-----------------|-------------|----------------------------------------------------------|-----------------|--------------|
| A_19_P00319537 | NR_027105       | LOC285419   | uncharacterized LOC285419                                |                 | -0,594131996 |
| A_21_P0001798  | ENST00000456248 | XLOC_002449 |                                                          | ENST00000456248 | -0,594314109 |
| A_21_P0011821  | NM_207328       | GPAT2       | glycerol-3-phosphate acyltransferase 2, mitochondrial    | ENST00000471661 | -0,59433372  |
| A_23_P204947   | NM_004004       | GJB2        | gap junction protein, beta 2, 26kDa                      | ENST00000382844 | -0,594451617 |
| A_32_P144342   | NM_006437       | PARP4       | poly (ADP-ribose) polymerase family, member 4            | ENST00000381989 | -0,594475325 |
| A_23_P19369    | NM_017640       | LRRRC16A    | leucine rich repeat containing 16A                       | ENST00000399313 | -0,594562269 |
| A_23_P64828    | NM_002534       | OAS1        | 2'-5'-oligoadenylate synthetase 1, 40/46kDa              | ENST00000377508 | -0,594565639 |
| A_23_P109345   | NM_004339       | PTTG1IP     | pituitary tumor-transforming 1 interacting protein       | ENST00000330938 | -0,594591654 |
| A_24_P135748   | NM_024719       | GRTP1       | growth hormone regulated TBC protein 1                   | ENST00000375430 | -0,594613539 |
| A_33_P3250887  | NM_001123225    | SYCE3       | synaptonemal complex central element protein 3           | ENST00000402753 | -0,594675281 |
| A_24_P98613    | NM_030927       | TSPAN14     | tetraspanin 14                                           | ENST00000265450 | -0,594680863 |
| A_33_P3263867  | NM_002562       | P2RX7       | purinergic receptor P2X, ligand-gated ion channel, 7     | ENST00000328963 | -0,594778684 |
| A_33_P3679936  | XR_109153       | LOC283483   | uncharacterized LOC283483                                |                 | -0,594781924 |
| A_21_P0001023  | AK023394        | XLOC_000441 |                                                          | ENST00000437833 | -0,594801519 |
| A_23_P206901   | NM_017668       | NDE1        | nudE nuclear distribution gene E homolog 1 (A. nidulans) | ENST00000396355 | -0,594830042 |
| A_24_P928052   | NM_003873       | NRP1        | neuropilin 1                                             | ENST00000374867 | -0,594930814 |
| A_21_P0006679  | ENST00000425541 | XLOC_008475 |                                                          | ENST00000425541 | -0,594987776 |
| A_33_P3227345  | NM_054014       | FKBP1A      | FK506 binding protein 1A, 12kDa                          | ENST00000356170 | -0,595028334 |
| A_21_P0005418  | TCONS_00013565  | XLOC_006210 |                                                          |                 | -0,595048908 |
| A_24_P333421   | NM_001099220    | ZNF862      | zinc finger protein 862                                  | ENST00000223210 | -0,595157251 |
| A_23_P16469    | NM_001005377    | PLAUR       | plasminogen activator, urokinase receptor                | ENST00000221264 | -0,595379415 |
| A_23_P101084   | NM_032598       | SPATA22     | spermatogenesis associated 22                            | ENST00000541913 | -0,595456442 |
| A_23_P109345   | NM_004339       | PTTG1IP     | pituitary tumor-transforming 1 interacting protein       | ENST00000330938 | -0,595484345 |
| A_23_P388190   | NM_033081       | DIDO1       | death inducer-obliterator 1                              | ENST00000461792 | -0,59562475  |
| A_33_P3356731  | NM_015332       | NUDCD3      | NudC domain containing 3                                 | ENST00000355451 | -0,595737203 |
| A_23_P103511   | NM_001085375    | C1orf226    | chromosome 1 open reading frame 226                      | ENST00000458626 | -0,59581371  |
| A_32_P91902    | NM_030927       | TSPAN14     | tetraspanin 14                                           | ENST00000429989 | -0,595843116 |
| A_23_P116829   | NM_003348       | UBE2N       | ubiquitin-conjugating enzyme E2N                         | ENST00000318066 | -0,595853913 |
| A_23_P24104    | NM_002658       | PLAU        | plasminogen activator, urokinase                         | ENST00000496777 | -0,595857034 |

|               |                  |                |                                                                                       |                 |              |
|---------------|------------------|----------------|---------------------------------------------------------------------------------------|-----------------|--------------|
| A_24_P116017  | NM_002813        | PSMD9          | proteasome (prosome, macropain) 26S subunit, non-ATPase                               | ENST00000541212 | -0,595874943 |
| A_21_P0012984 | ENST00000508945  | XLOC_I2_012023 |                                                                                       | ENST00000508945 | -0,595910591 |
| A_23_P39454   | NM_024967        | ZNF556         | zinc finger protein 556                                                               | ENST00000307635 | -0,595952839 |
| A_23_P109345  | NM_004339        | PTTG1IP        | pituitary tumor-transforming 1 interacting protein                                    | ENST00000330938 | -0,595962566 |
| A_33_P3215193 | NM_022787        | NMNAT1         | nicotinamide nucleotide adenyltransferase 1                                           | ENST00000403197 | -0,59597666  |
| A_23_P121253  | NM_003810        | TNFSF10        | tumor necrosis factor (ligand) superfamily, member 10                                 | ENST00000241261 | -0,596058703 |
| A_33_P3226167 | NM_022833        | FAM129B        | family with sequence similarity 129, member B                                         | ENST00000373312 | -0,596178402 |
| A_23_P308722  | NM_145038        | CCDC164        | coiled-coil domain containing 164                                                     | ENST00000288710 | -0,596258753 |
| A_33_P3356092 | NM_052893        | BTBD9          | BTB (POZ) domain containing 9                                                         | ENST00000403056 | -0,596300577 |
| A_23_P412321  | NM_000579        | CCR5           | chemokine (C-C motif) receptor 5                                                      | ENST00000343801 | -0,596346307 |
| A_24_P276628  | NM_000310        | PPT1           | palmitoyl-protein thioesterase 1                                                      | ENST00000527107 | -0,596394756 |
| A_23_P42353   | NM_016135        | ETV7           | ets variant 7                                                                         | ENST00000339796 | -0,596424388 |
| A_24_P336584  | NM_182664        | RASSF5         | Ras association (RalGDS/AF-6) domain family member 5                                  | ENST00000367118 | -0,59649821  |
| A_24_P102650  | NM_002458        | MUC5B          | mucin 5B, oligomeric mucus/gel-forming                                                | ENST00000349637 | -0,596523215 |
| A_23_P85783   | NM_006623        | PHGDH          | phosphoglycerate dehydrogenase                                                        | ENST00000369407 | -0,596563933 |
| A_23_P110184  | NM_006745        | MSMO1          | methylsterol monooxygenase 1                                                          | ENST00000393766 | -0,596628406 |
| A_23_P163481  | NM_001211        | BUB1B          | budding uninhibited by benzimidazoles 1 homolog beta (ye:)                            | ENST00000412359 | -0,596660479 |
| A_21_P0013272 | TCONS_I2_0002623 | XLOC_I2_013621 |                                                                                       |                 | -0,596841372 |
| A_24_P923251  | NM_198951        | TGM2           | transglutaminase 2 (C polypeptide, protein-glutamine-gamma-glutamyl transglutaminase) | ENST00000468262 | -0,596931407 |
| A_24_P84340   | NM_198828        | MAST4          | microtubule associated serine/threonine kinase family member 4                        | ENST00000478569 | -0,596933332 |
| A_23_P68240   | NM_207328        | GPAT2          | glycerol-3-phosphate acyltransferase 2, mitochondrial                                 | ENST00000377137 | -0,596973354 |
| A_23_P30050   | NM_006345        | SLC30A9        | solute carrier family 30 (zinc transporter), member 9                                 | ENST00000264451 | -0,597099187 |
| A_24_P916496  | NM_002737        | PRKCA          | protein kinase C, alpha                                                               |                 | -0,597140304 |
| A_23_P11841   | NM_001684        | ATP2B4         | ATPase, Ca++ transporting, plasma membrane 4                                          | ENST00000341360 | -0,597166549 |
| A_23_P115872  | NM_018131        | CEP55          | centrosomal protein 55kDa                                                             | ENST00000371485 | -0,597306276 |
| A_23_P122052  | NM_001008397     | GPX8           | glutathione peroxidase 8 (putative)                                                   | ENST00000503787 | -0,597334283 |
| A_23_P108751  | NM_001039492     | FHL2           | four and a half LIM domains 2                                                         | ENST00000358129 | -0,597338594 |
| A_23_P411296  | NM_005194        | CEBPB          | CCAAT/enhancer binding protein (C/EBP), beta                                          | ENST00000303004 | -0,597473021 |
| A_32_P211045  | NM_000791        | DHFR           | dihydrofolate reductase                                                               | ENST00000439211 | -0,597627454 |

|               |                |              |                                                        |                 |              |
|---------------|----------------|--------------|--------------------------------------------------------|-----------------|--------------|
| A_24_P48587   | NM_172341      | PSENE1       | presenilin enhancer 2 homolog (C. elegans)             | ENST00000222266 | -0,597634595 |
| A_33_P3262575 | NM_018842      | BAIAP2L1     | BAI1-associated protein 2-like 1                       | ENST00000005260 | -0,597636365 |
| A_23_P132248  | NM_019103      | ZMAT5        | zinc finger, matrin-type 5                             | ENST00000397781 | -0,597703804 |
| A_23_P116829  | NM_003348      | UBE2N        | ubiquitin-conjugating enzyme E2N                       | ENST00000318066 | -0,597784369 |
| A_23_P213000  | NM_017491      | WDR1         | WD repeat domain 1                                     | ENST00000382452 | -0,59782974  |
| A_23_P167227  | NM_005327      | HADH         | hydroxyacyl-CoA dehydrogenase                          | ENST00000505878 | -0,597858125 |
| A_23_P11543   | NM_000147      | FUCA1        | fucosidase, alpha-L- 1, tissue                         | ENST00000374479 | -0,598031509 |
| A_23_P24104   | NM_002658      | PLAU         | plasminogen activator, urokinase                       | ENST00000496777 | -0,598123126 |
| A_33_P3420224 | NM_001033113   | ENTPD8       | ectonucleoside triphosphate diphosphohydrolase 8       | ENST00000461823 | -0,598274768 |
| A_23_P201264  | NM_022787      | NMNAT1       | nicotinamide nucleotide adenyltransferase 1            | ENST00000377205 | -0,598319093 |
| A_33_P3219591 | NM_020954      | RNF213       | ring finger protein 213                                | ENST00000319921 | -0,598337054 |
| A_23_P202860  | NM_024514      | CYP2R1       | cytochrome P450, family 2, subfamily R, polypeptide 1  | ENST00000334636 | -0,598420508 |
| A_23_P342108  | NM_152612      | CCDC116      | coiled-coil domain containing 116                      | ENST00000292779 | -0,598472021 |
| A_21_P0005359 | NR_038393      | LOC100506178 | uncharacterized LOC100506178                           |                 | -0,598515701 |
| A_23_P97853   | NM_025125      | C10orf57     | chromosome 10 open reading frame 57                    | ENST00000372273 | -0,598613352 |
| A_21_P0003757 | CR740121       | XLOC_004049  |                                                        |                 | -0,598646529 |
| A_23_P157136  | NM_033128      | SCIN         | scinderin                                              | ENST00000341757 | -0,598663655 |
| A_23_P106405  | NM_002487      | NDN          | necdin homolog (mouse)                                 | ENST00000331837 | -0,598769212 |
| A_23_P10518   | NM_016521      | TFDP3        | transcription factor Dp family, member 3               | ENST00000310125 | -0,598800791 |
| A_23_P24104   | NM_002658      | PLAU         | plasminogen activator, urokinase                       | ENST00000496777 | -0,598810698 |
| A_23_P82249   | NM_007188      | ABCB8        | ATP-binding cassette, sub-family B (MDR/TAP), member 8 | ENST00000482309 | -0,598957838 |
| A_33_P3421728 | NM_001346      | DGKG         | diacylglycerol kinase, gamma 90kDa                     | ENST00000265022 | -0,599037886 |
| A_24_P102821  | NM_000952      | PTAFR        | platelet-activating factor receptor                    | ENST00000305392 | -0,599288086 |
| A_33_P3372332 | NM_000101      | CYBA         | cytochrome b-245, alpha polypeptide                    | ENST00000261623 | -0,599350161 |
| A_23_P11543   | NM_000147      | FUCA1        | fucosidase, alpha-L- 1, tissue                         | ENST00000374479 | -0,599374037 |
| A_23_P11543   | NM_000147      | FUCA1        | fucosidase, alpha-L- 1, tissue                         | ENST00000374479 | -0,599633378 |
| A_23_P64044   | NM_178443      | FERMT3       | fermitin family member 3                               | ENST00000540554 | -0,599772846 |
| A_33_P3240538 | NM_016262      | TUBE1        | tubulin, epsilon 1                                     | ENST00000368662 | -0,599844996 |
| A_21_P0001688 | TCONS_00002073 | XLOC_000264  |                                                        |                 | -0,599870065 |



|                |                 |              |                                                           |  |                 |              |
|----------------|-----------------|--------------|-----------------------------------------------------------|--|-----------------|--------------|
| A_21_P0006566  | THC2649084      | XLOC_008033  |                                                           |  |                 | -0,599935153 |
| A_21_P0005225  | ENST00000415356 | XLOC_006049  |                                                           |  | ENST00000415356 | -0,600042961 |
| A_24_P389916   | NM_005512       | LRRC32       | leucine rich repeat containing 32                         |  | ENST00000404995 | -0,600218765 |
| A_33_P3399433  | NM_001039140    | C20orf27     | chromosome 20 open reading frame 27                       |  | ENST00000379765 | -0,600404697 |
| A_23_P202837   | NM_053056       | CCND1        | cyclin D1                                                 |  | ENST00000227507 | -0,600526608 |
| A_23_P412321   | NM_000579       | CCR5         | chemokine (C-C motif) receptor 5                          |  | ENST00000343801 | -0,600550875 |
| A_33_P3239527  | AK126772        | LOC100128517 | uncharacterized LOC100128517                              |  |                 | -0,600687286 |
| A_19_P00803151 | ENST00000436710 | LOC100506119 |                                                           |  | ENST00000436710 | -0,600926743 |
| A_23_P141208   | NM_015510       | DHRS7B       | dehydrogenase/reductase (SDR family) member 7B            |  | ENST00000346603 | -0,600953946 |
| A_23_P211850   | NM_020676       | ABHD6        | abhydrolase domain containing 6                           |  | ENST00000478253 | -0,601002198 |
| A_19_P00321878 | NR_037177       | LOC100294145 | uncharacterized LOC100294145                              |  |                 | -0,601095767 |
| A_23_P68106    | NM_021103       | TMSB10       | thymosin beta 10                                          |  | ENST00000233143 | -0,601104605 |
| A_21_P0004213  | TCONS_00009852  | XLOC_004266  |                                                           |  |                 | -0,601162872 |
| A_23_P113701   | NM_002607       | PDGFA        | platelet-derived growth factor alpha polypeptide          |  | ENST00000402802 | -0,60121555  |
| A_23_P338952   | NM_022753       | S100BPB      | S100P binding protein                                     |  | ENST00000373475 | -0,601237574 |
| A_23_P394064   | NM_012232       | PTRF         | polymerase I and transcript release factor                |  | ENST00000357037 | -0,601250055 |
| A_23_P10647    | NM_018659       | CYTL1        | cytokine-like 1                                           |  | ENST00000307746 | -0,601306984 |
| A_23_P103864   | NM_024525       | TTC13        | tetratricopeptide repeat domain 13                        |  | ENST00000414259 | -0,601417757 |
| A_23_P256835   | NM_016030       | TTC15        | tetratricopeptide repeat domain 15                        |  | ENST00000437733 | -0,601478835 |
| A_23_P24104    | NM_002658       | PLAU         | plasminogen activator, urokinase                          |  | ENST00000496777 | -0,601656394 |
| A_23_P211401   | NM_001039570    | KREMEN1      | kringle containing transmembrane protein 1                |  | ENST00000407188 | -0,601851059 |
| A_23_P412321   | NM_000579       | CCR5         | chemokine (C-C motif) receptor 5                          |  | ENST00000343801 | -0,602073315 |
| A_24_P44462    | NM_000366       | TPM1         | tropomyosin 1 (alpha)                                     |  | ENST00000317516 | -0,602073365 |
| A_23_P214897   | NM_144497       | AKAP12       | A kinase (PRKA) anchor protein 12                         |  | ENST00000490177 | -0,602102143 |
| A_23_P120316   | NM_006636       | MTHFD2       | methylenetetrahydrofolate dehydrogenase (NADP+ depend     |  | ENST00000394053 | -0,602189276 |
| A_32_P5276     | NM_001251962    | ARHGEF26     | Rho guanine nucleotide exchange factor (GEF) 26           |  | ENST00000465817 | -0,602259009 |
| A_24_P344516   | NR_003578       | ZNF702P      | zinc finger protein 702, pseudogene                       |  | ENST00000270443 | -0,602283561 |
| A_24_P102293   | NM_015567       | SLITRK5      | SLIT and NTRK-like family, member 5                       |  | ENST00000325089 | -0,602321928 |
| A_23_P503010   | NM_153646       | SLC24A4      | solute carrier family 24 (sodium/potassium/calcium exchan |  | ENST00000532405 | -0,602331721 |

|               |                  |                |                                                              |                 |              |
|---------------|------------------|----------------|--------------------------------------------------------------|-----------------|--------------|
| A_23_P121564  | NM_000857        | GUCY1B3        | guanylate cyclase 1, soluble, beta 3                         | ENST00000264424 | -0,602398357 |
| A_23_P120931  | NM_014508        | APOBEC3C       | apolipoprotein B mRNA editing enzyme, catalytic polypeptide  | ENST00000361441 | -0,602443103 |
| A_32_P44568   | NM_005566        | LDHA           | lactate dehydrogenase A                                      | ENST00000543695 | -0,602528833 |
| A_23_P115872  | NM_018131        | CEP55          | centrosomal protein 55kDa                                    | ENST00000371485 | -0,602538812 |
| A_33_P3361741 | NM_013238        | DNAJC15        | DnaJ (Hsp40) homolog, subfamily C, member 15                 |                 | -0,602584098 |
| A_33_P3365810 | NM_002949        | MRPL12         | mitochondrial ribosomal protein L12                          | ENST00000332396 | -0,602636194 |
| A_32_P95914   | NM_198468        | MMS22L         | MMS22-like, DNA repair protein                               | ENST00000275053 | -0,60263833  |
| A_24_P149036  | NM_001387        | DPYSL3         | dihydropyrimidinase-like 3                                   | ENST00000398514 | -0,602661846 |
| A_23_P120467  | NM_199427        | ZFP64          | zinc finger protein 64 homolog (mouse)                       | ENST00000361387 | -0,602755706 |
| A_23_P11841   | NM_001684        | ATP2B4         | ATPase, Ca <sup>++</sup> transporting, plasma membrane 4     | ENST00000341360 | -0,603173515 |
| A_24_P19544   | NM_013233        | STK39          | serine threonine kinase 39                                   | ENST00000355999 | -0,603347502 |
| A_23_P104996  | NM_004183        | BEST1          | bestrophin 1                                                 | ENST00000524877 | -0,603430987 |
| A_33_P3392580 | NM_013411        | AK2            | adenylate kinase 2                                           | ENST00000373449 | -0,60350683  |
| A_23_P10647   | NM_018659        | CYTL1          | cytokine-like 1                                              | ENST00000307746 | -0,603603636 |
| A_23_P152782  | NM_005533        | IFI35          | interferon-induced protein 35                                | ENST00000538473 | -0,603611686 |
| A_33_P3287068 | BC027486         | LOC728437      | hCG2020170                                                   |                 | -0,603644296 |
| A_23_P113613  | NM_022842        | CDCP1          | CUB domain containing protein 1                              | ENST00000296129 | -0,60365236  |
| A_23_P1331    | NM_080801        | COL13A1        | collagen, type XIII, alpha 1                                 | ENST00000478219 | -0,603814533 |
| A_23_P113553  | NM_001011544     | MAGEA11        | melanoma antigen family A, 11                                | ENST00000355220 | -0,603984487 |
| A_24_P497186  | NM_182972        | IRF2BP2        | interferon regulatory factor 2 binding protein 2             | ENST00000366609 | -0,604087594 |
| A_23_P104996  | NM_004183        | BEST1          | bestrophin 1                                                 | ENST00000524877 | -0,604100481 |
| A_33_P3233565 | NM_000375        | UROS           | uroporphyrinogen III synthase                                | ENST00000420761 | -0,604151759 |
| A_21_P0006100 | THC2666038       | XLOC_007820    |                                                              |                 | -0,60415746  |
| A_23_P94533   | NM_001912        | CTSL1          | cathepsin L1                                                 | ENST00000375894 | -0,604196998 |
| A_23_P102471  | NM_000251        | MSH2           | mutS homolog 2, colon cancer, nonpolyposis type 1 (E. coli)  | ENST00000543555 | -0,604259663 |
| A_21_P0011709 | TCONS_I2_0001268 | XLOC_I2_006812 |                                                              |                 | -0,604325375 |
| A_23_P207445  | NM_002758        | MAP2K6         | mitogen-activated protein kinase kinase 6                    | ENST00000359094 | -0,60452103  |
| A_23_P58521   | NM_000082        | ERCC8          | excision repair cross-complementing rodent repair deficiency | ENST00000536596 | -0,604565438 |
| A_23_P107994  | NM_017854        | TMEM160        | transmembrane protein 160                                    | ENST00000253047 | -0,604581796 |

|               |                 |              |                                                                        |                 |              |
|---------------|-----------------|--------------|------------------------------------------------------------------------|-----------------|--------------|
| A_33_P3399318 | NM_018841       | GNG12        | guanine nucleotide binding protein (G protein), gamma 12               | ENST00000370982 | -0,60464202  |
| A_23_P150852  | NM_015292       | ESYT1        | extended synaptotagmin-like protein 1                                  | ENST00000541590 | -0,604725325 |
| A_24_P45620   | NM_021995       | UTS2         | urotensin 2                                                            | ENST00000054668 | -0,604975767 |
| A_23_P113701  | NM_002607       | PDGFA        | platelet-derived growth factor alpha polypeptide                       | ENST00000402802 | -0,605145495 |
| A_23_P121545  | NM_201591       | GPM6A        | glycoprotein M6A                                                       | ENST00000280187 | -0,605259456 |
| A_32_P45738   | NM_002629       | PGAM1        | phosphoglycerate mutase 1 (brain)                                      | ENST00000425387 | -0,60535879  |
| A_21_P0000194 | NM_014863       | CHST15       | carbohydrate (N-acetylgalactosamine 4-sulfate 6-O) sulfotransferase 15 |                 | -0,605373568 |
| A_23_P140876  | NM_001089       | ABCA3        | ATP-binding cassette, sub-family A (ABC1), member 3                    | ENST00000382381 | -0,605388974 |
| A_23_P88731   | NM_002875       | RAD51        | RAD51 homolog (S. cerevisiae)                                          | ENST00000525066 | -0,60548913  |
| A_33_P3214422 | ENST00000483551 | ANP32A       | acidic (leucine-rich) nuclear phosphoprotein 32 family, member 1       | ENST00000483551 | -0,605595238 |
| A_32_P137966  | NM_152317       | DEPDC4       | DEP domain containing 4                                                | ENST00000549341 | -0,605607028 |
| A_23_P11841   | NM_001684       | ATP2B4       | ATPase, Ca <sup>++</sup> transporting, plasma membrane 4               | ENST00000341360 | -0,605636442 |
| A_33_P3374478 | ENST00000429162 | CASC4        | cancer susceptibility candidate 4                                      | ENST00000429162 | -0,605668943 |
| A_23_P19322   | NM_018322       | C6orf64      | chromosome 6 open reading frame 64                                     | ENST00000229903 | -0,605828383 |
| A_33_P3237977 | NM_197958       | LARP6        | La ribonucleoprotein domain family, member 6                           | ENST00000344870 | -0,605848723 |
| A_21_P0010671 | NR_038845       | LOC643723    | uncharacterized LOC643723                                              |                 | -0,605915407 |
| A_23_P370625  | NM_020451       | SEPN1        | selenoprotein N, 1                                                     | ENST00000374315 | -0,605929814 |
| A_23_P115872  | NM_018131       | CEP55        | centrosomal protein 55kDa                                              | ENST00000371485 | -0,606055811 |
| A_23_P120316  | NM_006636       | MTHFD2       | methylenetetrahydrofolate dehydrogenase (NADP+ dependent)              | ENST00000394053 | -0,606092523 |
| A_23_P11543   | NM_000147       | FUCA1        | fucosidase, alpha-L- 1, tissue                                         | ENST00000374479 | -0,606110714 |
| A_33_P3258452 | NM_020375       | C12orf5      | chromosome 12 open reading frame 5                                     |                 | -0,606126073 |
| A_33_P3393170 | NM_004055       | CAPN5        | calpain 5                                                              | ENST00000360841 | -0,606249876 |
| A_23_P120316  | NM_006636       | MTHFD2       | methylenetetrahydrofolate dehydrogenase (NADP+ dependent)              | ENST00000394053 | -0,606319839 |
| A_23_P100386  | NM_152456       | IL34         | interleukin 34                                                         | ENST00000429149 | -0,606525748 |
| A_24_P344711  | NM_020132       | AGPAT3       | 1-acylglycerol-3-phosphate O-acyltransferase 3                         | ENST00000398058 | -0,606550866 |
| A_21_P0001111 | ENST00000440492 | XLOC_000755  |                                                                        | ENST00000440492 | -0,606726147 |
| A_23_P104972  | NM_023945       | MS4A5        | membrane-spanning 4-domains, subfamily A, member 5                     | ENST00000300190 | -0,606741672 |
| A_21_P0014659 | XR_110932       | LOC100506678 | uncharacterized LOC100506678                                           |                 | -0,606873413 |
| A_33_P3661329 | NR_027088       | LOC284661    | uncharacterized LOC284661                                              | ENST00000423197 | -0,606877172 |

|                |                 |                |                                                           |                 |              |
|----------------|-----------------|----------------|-----------------------------------------------------------|-----------------|--------------|
| A_23_P121253   | NM_003810       | TNFSF10        | tumor necrosis factor (ligand) superfamily, member 10     | ENST00000241261 | -0,606963883 |
| A_24_P175563   | NM_145698       | ACBD5          | acyl-CoA binding domain containing 5                      | ENST00000396271 | -0,6070086   |
| A_19_P00319917 | NR_038956       | LOC100506714   | uncharacterized LOC100506714                              |                 | -0,607037428 |
| A_21_P0000124  | NM_001195216    | DENND1B        | DENN/MADD domain containing 1B                            | ENST00000468589 | -0,60703779  |
| A_19_P00321220 | NR_038303       | LOC100505702   | uncharacterized LOC100505702                              |                 | -0,607053115 |
| A_21_P0007473  | TCONS_00020154  | XLOC_009604    |                                                           |                 | -0,607063545 |
| A_23_P1331     | NM_080801       | COL13A1        | collagen, type XIII, alpha 1                              | ENST00000478219 | -0,607106136 |
| A_23_P24104    | NM_002658       | PLAU           | plasminogen activator, urokinase                          | ENST00000496777 | -0,607110587 |
| A_21_P0007028  | TCONS_00018624  | XLOC_008978    |                                                           |                 | -0,607135504 |
| A_33_P3867534  | NM_182751       | MCM10          | minichromosome maintenance complex component 10           | ENST00000361282 | -0,60723321  |
| A_23_P77593    | NM_018052       | VAC14          | Vac14 homolog ( <i>S. cerevisiae</i> )                    | ENST00000536184 | -0,607235316 |
| A_21_P0014154  | XR_108621       | LOC100507367   | uncharacterized LOC100507367                              |                 | -0,607458304 |
| A_19_P00328996 | AK057050        | XLOC_I2_015037 |                                                           |                 | -0,607513776 |
| A_33_P3229918  | NM_001243168    | PTCRA          | pre T-cell antigen receptor alpha                         | ENST00000304672 | -0,607532607 |
| A_33_P3252191  | ENST00000394874 | PRKCE          | protein kinase C, epsilon                                 | ENST00000394874 | -0,607581726 |
| A_33_P3290577  | NM_032597       | MS4A14         | membrane-spanning 4-domains, subfamily A, member 14       | ENST00000395001 | -0,607599836 |
| A_21_P0006136  | TCONS_00015943  | XLOC_007314    |                                                           |                 | -0,607702581 |
| A_23_P24104    | NM_002658       | PLAU           | plasminogen activator, urokinase                          | ENST00000496777 | -0,607811241 |
| A_33_P3220570  | NM_024954       | UBTD1          | ubiquitin domain containing 1                             | ENST00000370664 | -0,607823453 |
| A_23_P11543    | NM_000147       | FUCA1          | fucosidase, alpha-L- 1, tissue                            | ENST00000374479 | -0,607845236 |
| A_33_P3321025  | NM_020911       | PLXNA4         | plexin A4                                                 | ENST00000359827 | -0,607938052 |
| A_21_P0012084  | CF126671        | LOC572558      | uncharacterized LOC572558                                 |                 | -0,60807818  |
| A_24_P810290   | NM_001030059    | PPAPDC1A       | phosphatidic acid phosphatase type 2 domain containing 1A | ENST00000369073 | -0,608079809 |
| A_23_P109345   | NM_004339       | PTTG1IP        | pituitary tumor-transforming 1 interacting protein        | ENST00000330938 | -0,608197414 |
| A_23_P361405   | NM_003549       | HYAL3          | hyaluronoglucosaminidase 3                                | ENST00000336307 | -0,60828742  |
| A_23_P114983   | NM_032588       | TRIM63         | tripartite motif containing 63                            | ENST00000374272 | -0,608297563 |
| A_23_P3302     | NM_018365       | MNS1           | meiosis-specific nuclear structural 1                     | ENST00000260453 | -0,608298324 |
| A_24_P190168   | NM_014573       | TMEM97         | transmembrane protein 97                                  | ENST00000336687 | -0,608345114 |
| A_21_P0004777  | BC034632        | XLOC_005844    |                                                           | ENST00000447848 | -0,608405619 |

|                |                 |                |                                                             |                 |              |
|----------------|-----------------|----------------|-------------------------------------------------------------|-----------------|--------------|
| A_23_P415791   | NM_020721       | KIAA1210       | KIAA1210                                                    | ENST00000402510 | -0,608488827 |
| A_23_P146908   | NM_004853       | STX8           | syntaxin 8                                                  | ENST00000306357 | -0,608491359 |
| A_33_P3735158  | AK093004        | LOC286272      | uncharacterized LOC286272                                   |                 | -0,608653127 |
| A_21_P0010697  | NR_023918       | LINC00339      | long intergenic non-protein coding RNA 339                  |                 | -0,608738263 |
| A_33_P3386765  | NM_015407       | ABHD14A        | abhydrolase domain containing 14A                           | ENST00000273596 | -0,608742135 |
| A_23_P16384    | NM_139176       | NLRP7          | NLR family, pyrin domain containing 7                       | ENST00000446217 | -0,608748062 |
| A_23_P399001   | NM_016463       | CXXC5          | CXXC finger protein 5                                       | ENST00000515038 | -0,608772208 |
| A_23_P408285   | NM_153026       | PRICKLE1       | prickle homolog 1 (Drosophila)                              | ENST00000552240 | -0,608896331 |
| A_33_P3226755  | AK125630        | FLNA           | filamin A, alpha                                            |                 | -0,608938491 |
| A_23_P122508   | NM_080870       | DPCR1          | diffuse panbronchiolitis critical region 1                  | ENST00000414703 | -0,608948427 |
| A_23_P29769    | NM_015472       | WWTR1          | WW domain containing transcription regulator 1              | ENST00000494754 | -0,608979941 |
| A_23_P32135    | NM_018956       | C9orf9         | chromosome 9 open reading frame 9                           | ENST00000350499 | -0,609026893 |
| A_21_P0011027  | ENST00000439483 | XLOC_l2_002477 |                                                             | ENST00000439483 | -0,609329851 |
| A_23_P40096    | NM_000312       | PROC           | protein C (inactivator of coagulation factors Va and VIIIa) | ENST00000453608 | -0,609354559 |
| A_32_P141768   | NM_020133       | AGPAT4         | 1-acylglycerol-3-phosphate O-acyltransferase 4 (lysophosph  | ENST00000320285 | -0,60938259  |
| A_23_P120316   | NM_006636       | MTHFD2         | methylenetetrahydrofolate dehydrogenase (NADP+ depend       | ENST00000394053 | -0,609449692 |
| A_23_P412321   | NM_000579       | CCR5           | chemokine (C-C motif) receptor 5                            | ENST00000343801 | -0,609457337 |
| A_23_P10385    | NM_016448       | DTL            | denticleless homolog (Drosophila)                           | ENST00000475419 | -0,609507486 |
| A_23_P113748   | NM_024697       | ZNF385D        | zinc finger protein 385D                                    | ENST00000494118 | -0,609540174 |
| A_23_P10647    | NM_018659       | CYTL1          | cytokine-like 1                                             | ENST00000307746 | -0,609552316 |
| A_32_P130630   | NM_004731       | SLC16A7        | solute carrier family 16, member 7 (monocarboxylic acid tra | ENST00000261187 | -0,609579185 |
| A_23_P120316   | NM_006636       | MTHFD2         | methylenetetrahydrofolate dehydrogenase (NADP+ depend       | ENST00000394053 | -0,609599658 |
| A_21_P0009053  | TCONS_00024718  | XLOC_011999    |                                                             |                 | -0,609616717 |
| A_33_P3403075  | NM_018304       | PRR11          | proline rich 11                                             | ENST00000262293 | -0,609908764 |
| A_19_P00319698 | XR_109474       | LOC100506821   | uncharacterized LOC100506821                                |                 | -0,609920284 |
| A_23_P207632   | NM_174953       | ATP2A3         | ATPase, Ca <sup>++</sup> transporting, ubiquitous           | ENST00000359983 | -0,609921281 |
| A_33_P3263232  | NM_030891       | LRRC3          | leucine rich repeat containing 3                            | ENST00000291592 | -0,61000985  |
| A_21_P0006227  | TCONS_00016159  | XLOC_007570    |                                                             |                 | -0,610300596 |
| A_24_P413884   | NM_001809       | CENPA          | centromere protein A                                        | ENST00000233505 | -0,61045613  |



|               |                  |                |                                                           |                 |              |
|---------------|------------------|----------------|-----------------------------------------------------------|-----------------|--------------|
| A_23_P420293  | NM_145013        | C11orf45       | chromosome 11 open reading frame 45                       | ENST00000310799 | -0,610460879 |
| A_23_P135769  | NM_001101        | ACTB           | actin, beta                                               | ENST00000445914 | -0,610493671 |
| A_24_P230938  | BC022054         | MORN4          | MORN repeat containing 4                                  | ENST00000370635 | -0,610584243 |
| A_33_P3236661 | BC150296         | PCDH9          | protocadherin 9                                           |                 | -0,610612829 |
| A_23_P411296  | NM_005194        | CEBPB          | CCAAT/enhancer binding protein (C/EBP), beta              | ENST00000303004 | -0,610691595 |
| A_23_P350574  | NM_001002901     | FCRLB          | Fc receptor-like B                                        | ENST00000495397 | -0,610715385 |
| A_21_P0009341 | NR_030732        | LOC645638      | WDNM1-like pseudogene                                     |                 | -0,610741074 |
| A_23_P120860  | NM_003634        | NIPSNAP1       | nipsnap homolog 1 ( <i>C. elegans</i> )                   | ENST00000216121 | -0,61093319  |
| A_23_P412321  | NM_000579        | CCR5           | chemokine (C-C motif) receptor 5                          | ENST00000343801 | -0,610943599 |
| A_21_P0002189 | TCONS_00003617   | XLOC_001406    |                                                           |                 | -0,611102468 |
| A_23_P104996  | NM_004183        | BEST1          | bestrophin 1                                              | ENST00000524877 | -0,611163848 |
| A_23_P121253  | NM_003810        | TNFSF10        | tumor necrosis factor (ligand) superfamily, member 10     | ENST00000241261 | -0,611177631 |
| A_24_P378987  | NM_145177        | DHRSX          | dehydrogenase/reductase (SDR family) X-linked             | ENST00000334651 | -0,611281119 |
| A_23_P29282   | NM_014293        | NPTXR          | neuronal pentraxin receptor                               | ENST00000333039 | -0,611403622 |
| A_21_P0002531 | TCONS_00004544   | XLOC_002452    |                                                           |                 | -0,611644853 |
| A_33_P3416946 | NM_018477        | ACTR10         | actin-related protein 10 homolog ( <i>S. cerevisiae</i> ) |                 | -0,61172272  |
| A_23_P135769  | NM_001101        | ACTB           | actin, beta                                               | ENST00000445914 | -0,61178868  |
| A_23_P138881  | NM_001104        | ACTN3          | actinin, alpha 3                                          | ENST00000502692 | -0,611818643 |
| A_33_P3354569 | NM_001083112     | GPD2           | glycerol-3-phosphate dehydrogenase 2 (mitochondrial)      |                 | -0,611881365 |
| A_23_P412321  | NM_000579        | CCR5           | chemokine (C-C motif) receptor 5                          | ENST00000343801 | -0,611920556 |
| A_23_P122508  | NM_080870        | DPCR1          | diffuse panbronchiolitis critical region 1                | ENST00000414703 | -0,611923968 |
| A_33_P3340990 | NM_001012398     | AKTIP          | AKT interacting protein                                   | ENST00000300245 | -0,611944384 |
| A_23_P24104   | NM_002658        | PLAU           | plasminogen activator, urokinase                          | ENST00000496777 | -0,612063926 |
| A_33_P3303121 | NM_002886        | RAP2B          | RAP2B, member of RAS oncogene family                      | ENST00000323534 | -0,612153037 |
| A_21_P0003325 | ENST00000514265  | XLOC_004072    |                                                           | ENST00000514265 | -0,612521056 |
| A_23_P98565   | NM_032597        | MS4A14         | membrane-spanning 4-domains, subfamily A, member 14       | ENST00000525397 | -0,612542263 |
| A_23_P334173  | NM_002349        | LY75           | lymphocyte antigen 75                                     | ENST00000263636 | -0,612643297 |
| A_23_P411296  | NM_005194        | CEBPB          | CCAAT/enhancer binding protein (C/EBP), beta              | ENST00000303004 | -0,612687358 |
| A_21_P0013498 | TCONS_I2_0002789 | XLOC_I2_014289 |                                                           |                 | -0,612746287 |

|               |                                 |                |                                                                |                 |              |
|---------------|---------------------------------|----------------|----------------------------------------------------------------|-----------------|--------------|
| A_21_P0012143 | ENST00000437920                 | XLOC_I2_008888 |                                                                | ENST00000437920 | -0,612848772 |
| A_24_P252996  | NM_000804                       | FOLR3          | folate receptor 3 (gamma)                                      | ENST00000542161 | -0,612952351 |
| A_23_P33613   | NM_024096                       | DCTPP1         | dCTP pyrophosphatase 1                                         | ENST00000319285 | -0,612962868 |
| A_23_P434398  | NM_153235                       | TXLNB          | taxilin beta                                                   | ENST00000358430 | -0,61303019  |
| A_33_P3253807 | NM_001806                       | CEBPG          | CCAAT/enhancer binding protein (C/EBP), gamma                  | ENST00000284000 | -0,613459011 |
| A_33_P3407835 | NM_144641                       | PPM1M          | protein phosphatase, Mg2+/Mn2+ dependent, 1M                   | ENST00000296487 | -0,613560492 |
| A_23_P412321  | NM_000579                       | CCR5           | chemokine (C-C motif) receptor 5                               | ENST00000343801 | -0,61359908  |
| A_23_P141126  | NM_000154                       | GALK1          | galactokinase 1                                                | ENST00000437911 | -0,613788684 |
| A_24_P383609  | NM_199461                       | NANOS1         | nanos homolog 1 (Drosophila)                                   | ENST00000340087 | -0,613801583 |
| A_33_P3352467 | NM_001050                       | SSTR2          | somatostatin receptor 2                                        | ENST00000357585 | -0,61381217  |
| A_23_P13094   | NM_002425                       | MMP10          | matrix metalloproteinase 10 (stromelysin 2)                    | ENST00000279441 | -0,613904094 |
| A_33_P3403942 | NM_080721                       | C20orf123      | chromosome 20 open reading frame 123                           | ENST00000279028 | -0,614083508 |
| A_21_P0010614 | TCONS_I2_0000123;XLOC_I2_000910 |                |                                                                |                 | -0,614135624 |
| A_21_P0010914 | ENST00000420049                 | XLOC_I2_001462 |                                                                | ENST00000420049 | -0,614291451 |
| A_33_P3279470 | NM_001138                       | AGRP           | agouti related protein homolog (mouse)                         | ENST00000290953 | -0,614305354 |
| A_21_P0000437 | NR_003294                       | SNORD115-2     | small nucleolar RNA, C/D box 115-2                             |                 | -0,614353965 |
| A_32_P175715  | NM_001080836                    | MEIG1          | meiosis expressed gene 1 homolog (mouse)                       | ENST00000378240 | -0,61441775  |
| A_23_P135769  | NM_001101                       | ACTB           | actin, beta                                                    | ENST00000445914 | -0,614573536 |
| A_32_P29784   | NM_001043352                    | TPM3           | tropomyosin 3                                                  | ENST00000330188 | -0,614591426 |
| A_33_P3246283 | AK128439                        | VAC14          | Vac14 homolog (S. cerevisiae)                                  |                 | -0,614603462 |
| A_33_P3382303 | NM_005892                       | FMNL1          | formin-like 1                                                  | ENST00000328118 | -0,614716563 |
| A_24_P335620  | NM_003486                       | SLC7A5         | solute carrier family 7 (amino acid transporter light chain, L | ENST00000261622 | -0,6149719   |
| A_23_P79622   | NM_181342                       | FKBP7          | FK506 binding protein 7                                        | ENST00000434643 | -0,61519217  |
| A_23_P334218  | NM_145647                       | WDR67          | WD repeat domain 67                                            | ENST00000287380 | -0,615193365 |
| A_23_P121253  | NM_003810                       | TNFSF10        | tumor necrosis factor (ligand) superfamily, member 10          | ENST00000241261 | -0,615204973 |
| A_23_P121564  | NM_000857                       | GUCY1B3        | guanylate cyclase 1, soluble, beta 3                           | ENST00000264424 | -0,615255301 |
| A_33_P3225843 | NM_173463                       | CCDC149        | coiled-coil domain containing 149                              | ENST00000382116 | -0,615267476 |
| A_23_P11256   | NM_138703                       | MAGEE2         | melanoma antigen family E, 2                                   | ENST00000373359 | -0,615447    |
| A_33_P3223488 | NM_023037                       | FRY            | furry homolog (Drosophila)                                     | ENST00000436046 | -0,615453129 |

|                |                 |             |                                                                         |                 |              |
|----------------|-----------------|-------------|-------------------------------------------------------------------------|-----------------|--------------|
| A_24_P104119   | NM_019034       | RHOF        | ras homolog gene family, member F (in filopodia)                        | ENST00000267205 | -0,615503588 |
| A_21_P0001059  | ENST00000423842 | XLOC_000554 |                                                                         | ENST00000423842 | -0,615543741 |
| A_23_P10647    | NM_018659       | CYTL1       | cytokine-like 1                                                         | ENST00000307746 | -0,615606982 |
| A_19_P00810227 | TCONS_00022559  | XLOC_010879 |                                                                         |                 | -0,615626431 |
| A_23_P60499    | NM_021224       | ZNF462      | zinc finger protein 462                                                 | ENST00000457913 | -0,615679459 |
| A_21_P0014629  | ENST00000400710 | FLJ44838    |                                                                         | ENST00000400710 | -0,615767093 |
| A_23_P135769   | NM_001101       | ACTB        | actin, beta                                                             | ENST00000445914 | -0,615842772 |
| A_23_P120316   | NM_006636       | MTHFD2      | methylenetetrahydrofolate dehydrogenase (NADP+ dependant)               | ENST00000394053 | -0,616025822 |
| A_33_P3272390  | NM_006267       | RANBP2      | RAN binding protein 2                                                   | ENST00000283195 | -0,61605527  |
| A_23_P22119    | NM_201380       | PLEC        | plectin                                                                 | ENST00000322810 | -0,616214105 |
| A_33_P3306823  | NM_001077624    | ZNF846      | zinc finger protein 846                                                 | ENST00000397902 | -0,616278145 |
| A_23_P300150   | NM_172387       | NFATC1      | nuclear factor of activated T-cells, cytoplasmic, calcineurin-dependent | ENST00000318065 | -0,616306563 |
| A_23_P70785    | NM_001624       | AIM1        | absent in melanoma 1                                                    | ENST00000369066 | -0,616450051 |
| A_23_P121253   | NM_003810       | TNFSF10     | tumor necrosis factor (ligand) superfamily, member 10                   | ENST00000241261 | -0,616499039 |
| A_23_P395172   | NM_007011       | ABHD2       | abhydrolase domain containing 2                                         | ENST00000352732 | -0,616533346 |
| A_24_P408424   | NM_002473       | MYH9        | myosin, heavy chain 9, non-muscle                                       | ENST00000216181 | -0,616553616 |
| A_23_P112004   | NM_012472       | LRRC6       | leucine rich repeat containing 6                                        | ENST00000395414 | -0,616624732 |
| A_24_P394698   | NM_181747       | ORC5        | origin recognition complex, subunit 5                                   | ENST00000422497 | -0,616683774 |
| A_33_P3359268  | NM_006339       | HMG20B      | high mobility group 20B                                                 | ENST00000402569 | -0,616765403 |
| A_24_P112087   | NM_014034       | ASF1A       | ASF1 anti-silencing function 1 homolog A ( <i>S. cerevisiae</i> )       | ENST00000229595 | -0,616778068 |
| A_23_P135769   | NM_001101       | ACTB        | actin, beta                                                             | ENST00000445914 | -0,616810284 |
| A_24_P472455   | NM_001663       | ARF6        | ADP-ribosylation factor 6                                               |                 | -0,61708794  |
| A_24_P189997   | NM_138322       | PCSK6       | proprotein convertase subtilisin/kexin type 6                           | ENST00000331826 | -0,617176441 |
| A_24_P189533   | NM_015036       | ENDOD1      | endonuclease domain containing 1                                        | ENST00000278505 | -0,617238635 |
| A_32_P171061   | NM_005170       | ASCL2       | achaete-scute complex homolog 2 ( <i>Drosophila</i> )                   | ENST00000331289 | -0,617390372 |
| A_23_P134714   | NM_005836       | HRSP12      | heat-responsive protein 12                                              | ENST00000522791 | -0,617438297 |
| A_23_P100141   | NM_023076       | UNKL        | unkempt homolog ( <i>Drosophila</i> )-like                              | ENST00000397464 | -0,617481916 |
| A_24_P166397   | NM_014809       | KIAA0319    | KIAA0319                                                                | ENST00000378214 | -0,61756738  |
| A_23_P103617   | NM_003568       | ANXA9       | annexin A9                                                              | ENST00000368947 | -0,617657373 |

|                |                  |                |                                                            |                 |              |
|----------------|------------------|----------------|------------------------------------------------------------|-----------------|--------------|
| A_23_P25935    | NM_007176        | C14orf1        | chromosome 14 open reading frame 1                         | ENST00000256319 | -0,617786992 |
| A_24_P98555    | NM_207009        | FAM45A         | family with sequence similarity 45, member A               | ENST00000448258 | -0,617790479 |
| A_23_P113701   | NM_002607        | PDGFA          | platelet-derived growth factor alpha polypeptide           | ENST00000402802 | -0,617815738 |
| A_23_P336565   | NM_001145268     | FAM185A        | family with sequence similarity 185, member A              | ENST00000413034 | -0,617949366 |
| A_24_P245838   | NM_002409        | MGAT3          | mannosyl (beta-1,4-)-glycoprotein beta-1,4-N-acetylglucosa | ENST00000341184 | -0,617959866 |
| A_23_P135769   | NM_001101        | ACTB           | actin, beta                                                | ENST00000445914 | -0,618037349 |
| A_33_P3289121  | NM_032411        | C2orf40        | chromosome 2 open reading frame 40                         | ENST00000479337 | -0,618204922 |
| A_24_P512054   | NM_024045        | DDX50          | DEAD (Asp-Glu-Ala-Asp) box polypeptide 50                  | ENST00000494889 | -0,61827634  |
| A_23_P121253   | NM_003810        | TNFSF10        | tumor necrosis factor (ligand) superfamily, member 10      | ENST00000241261 | -0,618323271 |
| A_33_P3316456  | NM_001200050     | NPL            | N-acetylneuraminase pyruvate lyase (dihydrodipicolinate sy | ENST00000258317 | -0,618354411 |
| A_23_P412321   | NM_000579        | CCR5           | chemokine (C-C motif) receptor 5                           | ENST00000343801 | -0,61840035  |
| A_23_P116829   | NM_003348        | UBE2N          | ubiquitin-conjugating enzyme E2N                           | ENST00000318066 | -0,618515343 |
| A_23_P106016   | NM_002742        | PRKD1          | protein kinase D1                                          | ENST00000331968 | -0,618539584 |
| A_23_P135769   | NM_001101        | ACTB           | actin, beta                                                | ENST00000445914 | -0,618539593 |
| A_23_P388812   | NM_152515        | CKAP2L         | cytoskeleton associated protein 2-like                     | ENST00000435431 | -0,618611069 |
| A_23_P372848   | NM_002558        | P2RX1          | purinergic receptor P2X, ligand-gated ion channel, 1       | ENST00000225538 | -0,618611326 |
| A_24_P81298    | NM_001123355     | PPP6C          | protein phosphatase 6, catalytic subunit                   | ENST00000373547 | -0,618667461 |
| A_23_P71530    | NM_002546        | TNFRSF11B      | tumor necrosis factor receptor superfamily, member 11b     | ENST00000521597 | -0,618692775 |
| A_21_P0002075  | ENST00000448595  | XLOC_002221    |                                                            | ENST00000448595 | -0,618899425 |
| A_32_P62997    | NM_018492        | PBK            | PDZ binding kinase                                         | ENST00000301905 | -0,619087666 |
| A_33_P3321871  | NR_038862        | FLJ42102       | uncharacterized LOC399923                                  | ENST00000331301 | -0,619136855 |
| A_23_P110184   | NM_006745        | MSMO1          | methylsterol monooxygenase 1                               | ENST00000393766 | -0,61916585  |
| A_23_P11841    | NM_001684        | ATP2B4         | ATPase, Ca <sup>++</sup> transporting, plasma membrane 4   | ENST00000341360 | -0,619166469 |
| A_33_P3306146  | NM_001145031     | PLAU           | plasminogen activator, urokinase                           | ENST00000372761 | -0,619234089 |
| A_23_P163458   | NM_139265        | EHD4           | EH-domain containing 4                                     | ENST00000220325 | -0,619244814 |
| A_21_P0013309  | TCONS_I2_0002659 | XLOC_I2_013848 |                                                            |                 | -0,619260114 |
| A_33_P3362296  | ENST00000396017  | KCNG1          | potassium voltage-gated channel, subfamily G, member 1     | ENST00000396017 | -0,619429083 |
| A_19_P00807207 | TCONS_00014970   | XLOC_007052    |                                                            |                 | -0,619433629 |
| A_23_P391228   | NM_001031740     | MANEAL         | mannosidase, endo-alpha-like                               | ENST00000373045 | -0,619483191 |

|                |                 |              |                                                                          |                 |              |
|----------------|-----------------|--------------|--------------------------------------------------------------------------|-----------------|--------------|
| A_21_P0000069  | NM_001167915    | VEPH1        | ventricular zone expressed PH domain homolog 1 (zebrafish)               | ENST00000468233 | -0,61969233  |
| A_23_P413796   | NM_138443       | HAUS1        | HAUS augmin-like complex, subunit 1                                      | ENST00000282058 | -0,619700808 |
| A_23_P115872   | NM_018131       | CEP55        | centrosomal protein 55kDa                                                | ENST00000371485 | -0,619713787 |
| A_23_P103486   | NM_000775       | CYP2J2       | cytochrome P450, family 2, subfamily J, polypeptide 2                    | ENST00000469406 | -0,619829762 |
| A_19_P00322939 | NR_003367       | PVT1         |                                                                          |                 | -0,619852051 |
| A_24_P627503   | ENST00000390613 | LOC100653245 | ig heavy chain V-III region VH26-like                                    | ENST00000390613 | -0,619874483 |
| A_23_P110184   | NM_006745       | MSMO1        | methylsterol monooxygenase 1                                             | ENST00000393766 | -0,619889617 |
| A_23_P435657   | NR_003683       | ALMS1P       | Alstrom syndrome 1 pseudogene                                            | ENST00000450720 | -0,619931372 |
| A_33_P3232498  | NM_001029883    | C2orf71      | chromosome 2 open reading frame 71                                       | ENST00000331664 | -0,619957066 |
| A_33_P3308905  | NM_001083535    | CEP57L1      | centrosomal protein 57kDa-like 1                                         | ENST00000407272 | -0,620094021 |
| A_23_P120860   | NM_003634       | NIPSNAP1     | nipsnap homolog 1 (C. elegans)                                           | ENST00000216121 | -0,620431495 |
| A_23_P166248   | NM_004414       | RCAN1        | regulator of calcineurin 1                                               | ENST00000443408 | -0,620440311 |
| A_23_P62932    | NM_001677       | ATP1B1       | ATPase, Na <sup>+</sup> /K <sup>+</sup> transporting, beta 1 polypeptide | ENST00000367816 | -0,620510551 |
| A_23_P427703   | NR_001447       | MT1L         | metallothionein 1L (gene/pseudogene)                                     |                 | -0,620515826 |
| A_32_P165116   | NM_138458       | WDR92        | WD repeat domain 92                                                      | ENST00000406334 | -0,620534028 |
| A_33_P3344801  | ENST00000372500 | SLC2A1       | solute carrier family 2 (facilitated glucose transporter), member 1      | ENST00000372500 | -0,62060053  |
| A_23_P152002   | NM_004049       | BCL2A1       | BCL2-related protein A1                                                  | ENST00000267953 | -0,620653287 |
| A_21_P0010405  | THC2613584      | XLOC_014192  |                                                                          |                 | -0,620774411 |
| A_23_P18078    | NM_002888       | RARRES1      | retinoic acid receptor responder (tazarotene induced) 1                  | ENST00000498640 | -0,620794376 |
| A_23_P35045    | NM_001025598    | ARHGAP30     | Rho GTPase activating protein 30                                         | ENST00000368013 | -0,620813165 |
| A_32_P300427   | NM_153360       | APCDD1L      | adenomatosis polyposis coli down-regulated 1-like                        | ENST00000371149 | -0,620975407 |
| A_33_P3257708  | NM_144772       | APOA1BP      | apolipoprotein A-I binding protein                                       | ENST00000368233 | -0,621074013 |
| A_19_P00331853 | NR_034089       | LOC100131564 | uncharacterized LOC100131564                                             |                 | -0,621087182 |
| A_21_P0006391  | TCONS_00016862  | XLOC_007835  |                                                                          |                 | -0,62110047  |
| A_23_P35343    | NM_021045       | ZNF248       | zinc finger protein 248                                                  | ENST00000494133 | -0,621243278 |
| A_32_P4018     | ENST00000371079 | ROR1         | receptor tyrosine kinase-like orphan receptor 1                          | ENST00000371079 | -0,621316231 |
| A_23_P24104    | NM_002658       | PLAU         | plasminogen activator, urokinase                                         | ENST00000496777 | -0,621433998 |
| A_23_P121253   | NM_003810       | TNFSF10      | tumor necrosis factor (ligand) superfamily, member 10                    | ENST00000241261 | -0,62148067  |
| A_24_P944049   | NM_015147       | CEP68        | centrosomal protein 68kDa                                                | ENST00000377990 | -0,62152938  |



|               |                  |                |                                                             |                 |              |
|---------------|------------------|----------------|-------------------------------------------------------------|-----------------|--------------|
| A_23_P3602    | NM_001243657     | NUDT7          | nudix (nucleoside diphosphate linked moiety X)-type motif   | ENST00000268533 | -0,62156804  |
| A_23_P28434   | NM_003761        | VAMP8          | vesicle-associated membrane protein 8 (endobrevin)          | ENST00000263864 | -0,621636921 |
| A_23_P202837  | NM_053056        | CCND1          | cyclin D1                                                   | ENST00000227507 | -0,621649888 |
| A_33_P3415032 | NM_002232        | KCNA3          | potassium voltage-gated channel, shaker-related subfamily,  | ENST00000369769 | -0,621743428 |
| A_23_P502170  | NM_015522        | DYNC2LI1       | dynein, cytoplasmic 2, light intermediate chain 1           | ENST00000479242 | -0,621766365 |
| A_23_P19352   | NM_006586        | CNPY3          | canopy 3 homolog (zebrafish)                                | ENST00000394142 | -0,621897571 |
| A_23_P3212    | NM_020234        | DTWD1          | DTW domain containing 1                                     | ENST00000403028 | -0,622001102 |
| A_23_P13907   | NM_000618        | IGF1           | insulin-like growth factor 1 (somatomedin C)                | ENST00000481539 | -0,622016967 |
| A_33_P3380356 | AK126705         | LOC100127991   | uncharacterized LOC100127991                                |                 | -0,622019034 |
| A_23_P76983   | NM_025057        | C14orf45       | chromosome 14 open reading frame 45                         | ENST00000394009 | -0,622075542 |
| A_33_P3644503 | NR_027124        | LOC339568      | uncharacterized LOC339568                                   | ENST00000412672 | -0,622128234 |
| A_24_P120115  | NM_003879        | CFLAR          | CASP8 and FADD-like apoptosis regulator                     | ENST00000340870 | -0,622152347 |
| A_33_P3234989 | NM_014055        | IFT81          | intraflagellar transport 81 homolog (Chlamydomonas)         | ENST00000552912 | -0,622352214 |
| A_23_P102471  | NM_000251        | MSH2           | mutS homolog 2, colon cancer, nonpolyposis type 1 (E. coli) | ENST00000543555 | -0,622380814 |
| A_23_P502224  | NM_007326        | CYB5R3         | cytochrome b5 reductase 3                                   | ENST00000407332 | -0,622436731 |
| A_21_P0002761 | ENST00000471993  | XLOC_002737    |                                                             | ENST00000471993 | -0,622575258 |
| A_24_P64039   | NM_006803        | AP3M2          | adaptor-related protein complex 3, mu 2 subunit             | ENST00000518421 | -0,622664374 |
| A_23_P408376  | NM_025015        | HSPA12A        | heat shock 70kDa protein 12A                                | ENST00000369209 | -0,622701903 |
| A_23_P34424   | NM_004700        | KCNQ4          | potassium voltage-gated channel, KQT-like subfamily, mem    | ENST00000506017 | -0,622741163 |
| A_23_P112846  | NM_001144978     | MTHFD2L        | methylenetetrahydrofolate dehydrogenase (NADP+ depend       | ENST00000492183 | -0,622879575 |
| A_23_P120316  | NM_006636        | MTHFD2         | methylenetetrahydrofolate dehydrogenase (NADP+ depend       | ENST00000394053 | -0,622889223 |
| A_23_P45304   | NM_021083        | XK             | X-linked Kx blood group (McLeod syndrome)                   | ENST00000378616 | -0,622911457 |
| A_21_P0010894 | TCONS_I2_0000369 | XLOC_I2_002049 |                                                             |                 | -0,622921345 |
| A_23_P153745  | NM_006332        | IFI30          | interferon, gamma-inducible protein 30                      | ENST00000407280 | -0,622996574 |
| A_24_P53282   | NM_001304        | CPD            | carboxypeptidase D                                          | ENST00000225719 | -0,623036249 |
| A_23_P121480  | NM_001004196     | CD200          | CD200 molecule                                              | ENST00000478595 | -0,623217703 |
| A_23_P117662  | NM_002112        | HDC            | histidine decarboxylase                                     | ENST00000267845 | -0,623220552 |
| A_21_P0012436 | TCONS_I2_0001920 | XLOC_I2_010139 |                                                             |                 | -0,623280486 |
| A_23_P100141  | NM_023076        | UNKL           | unkempt homolog (Drosophila)-like                           | ENST00000397464 | -0,623284758 |

|               |                 |              |                                                               |                 |              |
|---------------|-----------------|--------------|---------------------------------------------------------------|-----------------|--------------|
| A_24_P352952  | NM_017565       | FAM20A       | family with sequence similarity 20, member A                  | ENST00000375556 | -0,623301038 |
| A_23_P417415  | NM_147161       | ACOT11       | acyl-CoA thioesterase 11                                      | ENST00000451902 | -0,623377357 |
| A_33_P3270668 | NM_001031690    | FAM131B      | family with sequence similarity 131, member B                 | ENST00000409222 | -0,623553019 |
| A_23_P12082   | NM_001025199    | CHI3L2       | chitinase 3-like 2                                            | ENST00000369748 | -0,623622446 |
| A_23_P6596    | NM_005524       | HES1         | hairy and enhancer of split 1, (Drosophila)                   | ENST00000476918 | -0,623680304 |
| A_23_P75741   | NM_198183       | UBE2L6       | ubiquitin-conjugating enzyme E2L 6                            | ENST00000528275 | -0,623753742 |
| A_33_P3351120 | NM_003330       | TXNRD1       | thioredoxin reductase 1                                       | ENST00000378070 | -0,623761821 |
| A_21_P0008235 | TCONS_00022170  | XLOC_010374  |                                                               |                 | -0,623866123 |
| A_24_P297539  | NM_181803       | UBE2C        | ubiquitin-conjugating enzyme E2C                              | ENST00000405520 | -0,623913501 |
| A_33_P3285156 | NR_026857       | FLJ90757     | uncharacterized LOC440465                                     |                 | -0,624045753 |
| A_23_P75310   | NM_021226       | ARHGAP22     | Rho GTPase activating protein 22                              | ENST00000417247 | -0,624231695 |
| A_23_P415401  | NM_001206       | KLF9         | Kruppel-like factor 9                                         | ENST00000377126 | -0,624412922 |
| A_23_P204304  | NM_030667       | PTPRO        | protein tyrosine phosphatase, receptor type, O                | ENST00000281171 | -0,624485762 |
| A_21_P0010225 | TCONS_00028980  | XLOC_013894  |                                                               |                 | -0,62468843  |
| A_23_P45560   | NM_000273       | GPR143       | G protein-coupled receptor 143                                | ENST00000380929 | -0,624733919 |
| A_32_P352743  | NM_001004440    | FAM19A3      | family with sequence similarity 19 (chemokine (C-C motif)-li  | ENST00000369630 | -0,625018255 |
| A_24_P82493   | NM_024819       | DCAKD        | dephospho-CoA kinase domain containing                        | ENST00000342350 | -0,625056396 |
| A_24_P56270   | NM_006482       | DYRK2        | dual-specificity tyrosine-(Y)-phosphorylation regulated kina: | ENST00000344096 | -0,625074579 |
| A_33_P3242543 | NM_000240       | MAOA         | monoamine oxidase A                                           | ENST00000338702 | -0,625101672 |
| A_21_P0014387 | XR_109558       | LOC100507094 | uncharacterized LOC100507094                                  |                 | -0,625263891 |
| A_21_P0010854 | NR_027916       | AKR1CL1      | aldo-keto reductase family 1, member C-like 1                 | ENST00000432689 | -0,62530053  |
| A_32_P105549  | NM_001630       | ANXA8L2      | annexin A8-like 2                                             | ENST00000344416 | -0,625320105 |
| A_33_P3335571 | NR_029192       | LOC100133315 | transient receptor potential cation channel, subfamily C, me  | ENST00000532852 | -0,625450615 |
| A_23_P42746   | NM_000265       | NCF1         | neutrophil cytosolic factor 1                                 | ENST00000289473 | -0,625988872 |
| A_23_P60579   | NM_002435       | MPI          | mannose phosphate isomerase                                   | ENST00000535694 | -0,626042387 |
| A_23_P57709   | NM_013363       | PCOLCE2      | procollagen C-endopeptidase enhancer 2                        | ENST00000470795 | -0,626049506 |
| A_23_P80032   | NM_005225       | E2F1         | E2F transcription factor 1                                    | ENST00000343380 | -0,626070658 |
| A_21_P0003384 | ENST00000514327 | XLOC_003631  |                                                               | ENST00000514327 | -0,626154301 |
| A_23_P120316  | NM_006636       | MTHFD2       | methylenetetrahydrofolate dehydrogenase (NADP+ depend         | ENST00000394053 | -0,626186174 |

|                |                  |                |                                                        |                 |              |
|----------------|------------------|----------------|--------------------------------------------------------|-----------------|--------------|
| A_33_P3376264  | ENST00000378938  | GK             | glycerol kinase                                        | ENST00000378938 | -0,626350717 |
| A_21_P0009109  | THC2668465       | XLOC_011763    |                                                        |                 | -0,626519988 |
| A_32_P143000   | NM_015307        | FAM189A1       | family with sequence similarity 189, member A1         | ENST00000261275 | -0,626601781 |
| A_33_P3240512  | NM_138444        | KCTD12         | potassium channel tetramerisation domain containing 12 | ENST00000377474 | -0,626634694 |
| A_23_P151150   | NM_202002        | FOXM1          | forkhead box M1                                        | ENST00000359843 | -0,62666491  |
| A_23_P321388   | NM_153341        | RNF19B         | ring finger protein 19B                                | ENST00000405457 | -0,626896584 |
| A_21_P0012192  | TCONS_I2_0001717 | XLOC_I2_009172 |                                                        |                 | -0,626951439 |
| A_23_P371039   | NM_002531        | NTSR1          | neurotensin receptor 1 (high affinity)                 | ENST00000370501 | -0,627029209 |
| A_23_P100141   | NM_023076        | UNKL           | unkempt homolog (Drosophila)-like                      | ENST00000397464 | -0,627051865 |
| A_21_P0003446  | TCONS_00007714   | XLOC_003872    |                                                        |                 | -0,627078646 |
| A_23_P7313     | NM_001040058     | SPP1           | secreted phosphoprotein 1                              | ENST00000360804 | -0,627081616 |
| A_33_P3259736  | NM_014324        | AMACR          | alpha-methylacyl-CoA racemase                          | ENST00000382079 | -0,627191739 |
| A_33_P3241541  | CR936789         | FSD1L          | fibronectin type III and SPRY domain containing 1-like | ENST00000374707 | -0,627229909 |
| A_23_P5778     | NM_022449        | RAB17          | RAB17, member RAS oncogene family                      | ENST00000414278 | -0,627432529 |
| A_23_P217917   | NM_147148        | GSTM4          | glutathione S-transferase mu 4                         | ENST00000493171 | -0,627547339 |
| A_23_P412321   | NM_000579        | CCR5           | chemokine (C-C motif) receptor 5                       | ENST00000343801 | -0,627667102 |
| A_21_P0011568  | TCONS_00025589   | XLOC_I2_005997 |                                                        |                 | -0,627787413 |
| A_21_P0011730  | TCONS_I2_0001294 | XLOC_I2_006973 |                                                        |                 | -0,627859069 |
| A_23_P109964   | NM_032600        | CCDC54         | coiled-coil domain containing 54                       | ENST00000261058 | -0,627908318 |
| A_21_P0010565  | NM_004595        | SMS            | spermine synthase                                      | ENST00000404933 | -0,627963806 |
| A_33_P3214035  | NM_000675        | ADORA2A        | adenosine A2a receptor                                 | ENST00000436735 | -0,628026    |
| A_23_P128919   | NM_002306        | LGALS3         | lectin, galactoside-binding, soluble, 3                | ENST00000254301 | -0,628099785 |
| A_19_P00806771 | XR_132670        | LOC100652730   | uncharacterized LOC100652730                           | ENST00000412500 | -0,628127458 |
| A_32_P210642   | NM_201446        | EGFL7          | EGF-like-domain, multiple 7                            | ENST00000308874 | -0,628511463 |
| A_19_P00802615 | NR_034089        | LOC100131564   | uncharacterized LOC100131564                           |                 | -0,628766283 |
| A_23_P119778   | NM_020342        | SLC39A10       | solute carrier family 39 (zinc transporter), member 10 | ENST00000409086 | -0,628768913 |
| A_21_P0014705  | XR_112228        | LOC100507807   | uncharacterized LOC100507807                           |                 | -0,628884428 |
| A_21_P0006125  | TCONS_00015917   | XLOC_007279    |                                                        |                 | -0,628927865 |
| A_32_P104478   | NM_018351        | FGD6           | FYVE, RhoGEF and PH domain containing 6                | ENST00000343958 | -0,62903607  |

|                |                 |              |                                                             |                 |              |
|----------------|-----------------|--------------|-------------------------------------------------------------|-----------------|--------------|
| A_24_P277295   | NM_198490       | RAB43        | RAB43, member RAS oncogene family                           | ENST00000315150 | -0,629149511 |
| A_23_P102471   | NM_000251       | MSH2         | mutS homolog 2, colon cancer, nonpolyposis type 1 (E. coli) | ENST00000543555 | -0,62918644  |
| A_21_P0000851  | NR_038953       | LOC100507564 | uncharacterized LOC100507564                                |                 | -0,629336399 |
| A_23_P58321    | NM_001237       | CCNA2        | cyclin A2                                                   | ENST00000274026 | -0,629370846 |
| A_33_P3225625  | NM_001003799    | TARP         | TCR gamma alternate reading frame protein                   | ENST00000443402 | -0,629443391 |
| A_23_P100127   | NM_170589       | CASC5        | cancer susceptibility candidate 5                           | ENST00000260369 | -0,629539451 |
| A_21_P0009555  | TCONS_00026518  | XLOC_012839  |                                                             |                 | -0,629565172 |
| A_33_P3277575  | ENST00000404147 | CDCA5        | cell division cycle associated 5                            | ENST00000404147 | -0,629722733 |
| A_19_P00320723 | NR_040059       | LOC100131089 | uncharacterized LOC100131089                                |                 | -0,62985358  |
| A_23_P100141   | NM_023076       | UNKL         | unkempt homolog (Drosophila)-like                           | ENST00000397464 | -0,629861504 |
| A_33_P3283713  | NM_015407       | ABHD14A      | abhydrolase domain containing 14A                           | ENST00000360889 | -0,629898725 |
| A_33_P3268304  | NM_001161404    | LIMS2        | LIM and senescent cell antigen-like domains 2               | ENST00000537572 | -0,629914639 |
| A_23_P7313     | NM_001040058    | SPP1         | secreted phosphoprotein 1                                   | ENST00000360804 | -0,630004951 |
| A_23_P31921    | NM_000050       | ASS1         | argininosuccinate synthase 1                                | ENST00000422569 | -0,630336587 |
| A_23_P161152   | NM_014317       | PDSS1        | prenyl (decaprenyl) diphosphate synthase, subunit 1         | ENST00000470978 | -0,63045026  |
| A_33_P3350621  | NM_001111101    | CNRIP1       | cannabinoid receptor interacting protein 1                  | ENST00000409559 | -0,63066655  |
| A_23_P204947   | NM_004004       | GJB2         | gap junction protein, beta 2, 26kDa                         | ENST00000382844 | -0,630850649 |
| A_23_P112311   | NM_012210       | TRIM32       | tripartite motif containing 32                              | ENST00000450136 | -0,631020801 |
| A_33_P3390731  | NM_001012398    | AKTIP        | AKT interacting protein                                     | ENST00000300245 | -0,631116795 |
| A_21_P0009342  | NR_030732       | LOC645638    | WDNM1-like pseudogene                                       |                 | -0,631225543 |
| A_23_P87580    | NM_012404       | ANP32D       | acidic (leucine-rich) nuclear phosphoprotein 32 family, men | ENST00000266594 | -0,631227684 |
| A_23_P77545    | NM_001053       | SSTR5        | somatostatin receptor 5                                     | ENST00000539762 | -0,631251865 |
| A_23_P106602   | NM_031476       | CRISPLD2     | cysteine-rich secretory protein LCCL domain containing 2    | ENST00000262424 | -0,631379718 |
| A_23_P7313     | NM_001040058    | SPP1         | secreted phosphoprotein 1                                   | ENST00000360804 | -0,631400089 |
| A_23_P7313     | NM_001040058    | SPP1         | secreted phosphoprotein 1                                   | ENST00000360804 | -0,631680643 |
| A_33_P3481113  | NR_038398       | CECR3        | cat eye syndrome chromosome region, candidate 3 (non-pr     | ENST00000428828 | -0,631800323 |
| A_21_P0010481  | TCONS_00029926  | XLOC_014404  |                                                             |                 | -0,631843664 |
| A_32_P138004   | NM_207009       | FAM45A       | family with sequence similarity 45, member A                | ENST00000546291 | -0,631878181 |
| A_21_P0007174  | TCONS_00019235  | XLOC_009065  |                                                             |                 | -0,632013187 |

|                |                 |              |                                                                       |                 |              |
|----------------|-----------------|--------------|-----------------------------------------------------------------------|-----------------|--------------|
| A_23_P117727   | NM_139242       | MTFMT        | mitochondrial methionyl-tRNA formyltransferase                        | ENST00000220058 | -0,632016236 |
| A_33_P3364854  | NM_018646       | TRPV6        | transient receptor potential cation channel, subfamily V, member 6    | ENST00000311470 | -0,632182888 |
| A_33_P3270311  | NM_020760       | HECW2        | HECT, C2 and WW domain containing E3 ubiquitin protein ligase 2       | ENST00000260983 | -0,632223671 |
| A_21_P0000980  | ENST00000450811 | XLOC_000229  |                                                                       | ENST00000450811 | -0,632294311 |
| A_23_P58228    | NM_017855       | ODAM         | odontogenic, ameloblast associated                                    | ENST00000510847 | -0,63230549  |
| A_23_P24104    | NM_002658       | PLAU         | plasminogen activator, urokinase                                      | ENST00000496777 | -0,63237207  |
| A_23_P114466   | NM_033284       | TBL1Y        | transducin (beta)-like 1, Y-linked                                    | ENST00000383032 | -0,632468349 |
| A_23_P112004   | NM_012472       | LRR6C        | leucine rich repeat containing 6                                      | ENST00000395414 | -0,632583369 |
| A_33_P3311041  | AK096227        | CKAP2        | cytoskeleton associated protein 2                                     |                 | -0,632690717 |
| A_23_P171107   | NM_033031       | CCNB3        | cyclin B3                                                             | ENST00000376042 | -0,632712568 |
| A_23_P7313     | NM_001040058    | SPP1         | secreted phosphoprotein 1                                             | ENST00000360804 | -0,632727587 |
| A_24_P322353   | NM_024430       | PSTPIP2      | proline-serine-threonine phosphatase interacting protein 2            | ENST00000495213 | -0,632801736 |
| A_23_P106602   | NM_031476       | CRISPLD2     | cysteine-rich secretory protein LCCL domain containing 2              | ENST00000262424 | -0,632947047 |
| A_21_P0009773  | TCONS_00027385  | XLOC_013370  |                                                                       |                 | -0,633069435 |
| A_24_P12281    | NM_007077       | AP4S1        | adaptor-related protein complex 4, sigma 1 subunit                    | ENST00000556232 | -0,633132045 |
| A_23_P88626    | NM_001150       | ANPEP        | alanyl (membrane) aminopeptidase                                      | ENST00000300060 | -0,633162905 |
| A_19_P00319201 | NM_173463       | CCDC149      | coiled-coil domain containing 149                                     | ENST00000504487 | -0,633374419 |
| A_33_P3317253  | NM_001001484    | PTER         | phosphotriesterase related                                            | ENST00000378000 | -0,633634491 |
| A_23_P115872   | NM_018131       | CEP55        | centrosomal protein 55kDa                                             | ENST00000371485 | -0,633643474 |
| A_33_P3229196  | NM_004357       | CD151        | CD151 molecule (Raph blood group)                                     | ENST00000397420 | -0,633797782 |
| A_21_P0001105  | ENST00000455966 | XLOC_000732  |                                                                       | ENST00000455966 | -0,633850373 |
| A_21_P0001703  | TCONS_00002153  | XLOC_000385  |                                                                       |                 | -0,633870844 |
| A_33_P3280779  | NM_025125       | C10orf57     | chromosome 10 open reading frame 57                                   | ENST00000372274 | -0,633921029 |
| A_23_P204947   | NM_004004       | GJB2         | gap junction protein, beta 2, 26kDa                                   | ENST00000382844 | -0,633963548 |
| A_23_P100127   | NM_170589       | CASC5        | cancer susceptibility candidate 5                                     | ENST00000260369 | -0,633991131 |
| A_23_P104073   | NM_002960       | S100A3       | S100 calcium binding protein A3                                       | ENST00000368712 | -0,63406316  |
| A_21_P0014404  | ENST00000422459 | LOC100506115 |                                                                       | ENST00000422459 | -0,634067435 |
| A_33_P3392537  | NM_004614       | TK2          | thymidine kinase 2, mitochondrial                                     | ENST00000451102 | -0,634079378 |
| A_32_P73796    | NM_014906       | PPM1E        | protein phosphatase, Mg <sup>2+</sup> /Mn <sup>2+</sup> dependent, 1E | ENST00000308249 | -0,6341116   |



|                |                 |                |                                                             |                 |              |
|----------------|-----------------|----------------|-------------------------------------------------------------|-----------------|--------------|
| A_21_P0000764  | NR_038324       | LOC100505768   | uncharacterized LOC100505768                                | ENST00000452509 | -0,634273362 |
| A_23_P359746   | NM_176817       | TAS2R38        | taste receptor, type 2, member 38                           | ENST00000547270 | -0,634366055 |
| A_21_P0007793  | THC2684861      | XLOC_010251    |                                                             |                 | -0,634450721 |
| A_23_P53763    | NM_025113       | KIAA0226L      | KIAA0226-like                                               | ENST00000534925 | -0,634575215 |
| A_33_P3307903  | NM_005192       | CDKN3          | cyclin-dependent kinase inhibitor 3                         | ENST00000216414 | -0,634610847 |
| A_24_P172990   | NM_001605       | AARS           | alanyl-tRNA synthetase                                      | ENST00000261772 | -0,634648745 |
| A_33_P3236102  | NM_203434       | IER5L          | immediate early response 5-like                             | ENST00000372491 | -0,634653465 |
| A_21_P0000091  | NM_001172780    | LRRC34         | leucine rich repeat containing 34                           | ENST00000524327 | -0,634827496 |
| A_23_P7313     | NM_001040058    | SPP1           | secreted phosphoprotein 1                                   | ENST00000360804 | -0,634882467 |
| A_21_P0010536  | NM_018284       | GBP3           | guanylate binding protein 3                                 | ENST00000461384 | -0,635175994 |
| A_23_P380881   | NM_152345       | ANKRD13B       | ankyrin repeat domain 13B                                   | ENST00000493506 | -0,635266691 |
| A_33_P3381623  | NM_153021       | PLB1           | phospholipase B1                                            | ENST00000329020 | -0,635629737 |
| A_24_P117323   | NM_032775       | KLHL22         | kelch-like 22 (Drosophila)                                  | ENST00000440659 | -0,63572011  |
| A_23_P7313     | NM_001040058    | SPP1           | secreted phosphoprotein 1                                   | ENST00000360804 | -0,635738989 |
| A_33_P3249046  | NM_001171092    | CLDN2          | claudin 2                                                   | ENST00000336803 | -0,63574867  |
| A_21_P0005198  | XR_113026       | LOC100505669   | uncharacterized LOC100505669                                |                 | -0,635799176 |
| A_24_P397489   | NM_001491       | GCNT2          | glucosaminyl (N-acetyl) transferase 2, I-branching enzyme ( | ENST00000379597 | -0,635843079 |
| A_23_P116653   | NM_138722       | BCL2L14        | BCL2-like 14 (apoptosis facilitator)                        | ENST00000396369 | -0,635855336 |
| A_19_P00316624 | ENST00000514050 | XLOC_I2_011173 |                                                             | ENST00000514050 | -0,636031996 |
| A_32_P100109   | NM_004726       | REPS2          | RALBP1 associated Eps domain containing 2                   | ENST00000357277 | -0,636133002 |
| A_23_P114466   | NM_033284       | TBL1Y          | transducin (beta)-like 1, Y-linked                          | ENST00000383032 | -0,636370469 |
| A_33_P3246007  | NM_144772       | APOA1BP        | apolipoprotein A-I binding protein                          | ENST00000368235 | -0,636447957 |
| A_33_P3388501  | NM_003465       | CHIT1          | chitinase 1 (chitotriosidase)                               | ENST00000491855 | -0,636550133 |
| A_33_P3313055  | NM_000435       | NOTCH3         | notch 3                                                     | ENST00000263388 | -0,636560498 |
| A_33_P3405966  | NM_174964       | ST3GAL3        | ST3 beta-galactoside alpha-2,3-sialyltransferase 3          | ENST00000372362 | -0,63673876  |
| A_24_P20383    | NM_005718       | ARPC4          | actin related protein 2/3 complex, subunit 4, 20kDa         | ENST00000485273 | -0,637024512 |
| A_21_P0008636  | TCONS_00023422  | XLOC_011264    |                                                             |                 | -0,637079908 |
| A_21_P0006228  | CF127220        | XLOC_007571    |                                                             |                 | -0,637162404 |
| A_23_P125680   | NM_017938       | FAM70A         | family with sequence similarity 70, member A                | ENST00000440464 | -0,637207202 |

|               |                                 |                |                                                           |                 |              |
|---------------|---------------------------------|----------------|-----------------------------------------------------------|-----------------|--------------|
| A_24_P111996  | NM_000410                       | HFE            | hemochromatosis                                           | ENST00000397022 | -0,637226903 |
| A_21_P0010648 | TCONS_I2_0000149;XLOC_I2_001086 |                |                                                           |                 | -0,637478464 |
| A_24_P62783   | NM_004102                       | FABP3          | fatty acid binding protein 3, muscle and heart (mammary-d | ENST00000482018 | -0,637732457 |
| A_23_P362659  | NM_002468                       | MYD88          | myeloid differentiation primary response gene (88)        | ENST00000484513 | -0,637787664 |
| A_23_P8981    | NM_000349                       | STAR           | steroidogenic acute regulatory protein                    | ENST00000520114 | -0,637899027 |
| A_32_P205053  | ENST00000375099                 | UBXN10         | UBX domain protein 10                                     | ENST00000375099 | -0,638025275 |
| A_33_P3705907 | NM_058190                       | FAM207A        | family with sequence similarity 207, member A             | ENST00000479127 | -0,638188851 |
| A_21_P0013601 | AK024464                        | XLOC_I2_015033 |                                                           |                 | -0,63825866  |
| A_33_P3816688 | NM_133263                       | PPARGC1B       | peroxisome proliferator-activated receptor gamma, coactiv | ENST00000309241 | -0,638275841 |
| A_24_P472007  | NM_001080421                    | UNC13A         | unc-13 homolog A (C. elegans)                             | ENST00000252773 | -0,638351515 |
| A_23_P393955  | NM_175741                       | C15orf55       | chromosome 15 open reading frame 55                       | ENST00000537011 | -0,638391886 |
| A_23_P7313    | NM_001040058                    | SPP1           | secreted phosphoprotein 1                                 | ENST00000360804 | -0,638582422 |
| A_23_P113393  | NM_017413                       | APLN           | apelin                                                    | ENST00000307484 | -0,638642477 |
| A_33_P3792328 | ENST00000306024                 | LSM3           | LSM3 homolog, U6 small nuclear RNA associated (S. cerevis | ENST00000306024 | -0,638674528 |
| A_23_P7313    | NM_001040058                    | SPP1           | secreted phosphoprotein 1                                 | ENST00000360804 | -0,63868218  |
| A_33_P3407256 | NM_001166260                    | TRIP13         | thyroid hormone receptor interactor 13                    | ENST00000512024 | -0,638822111 |
| A_23_P118815  | NM_001012271                    | BIRC5          | baculoviral IAP repeat containing 5                       | ENST00000301633 | -0,638863695 |
| A_33_P3340025 | NM_021067                       | GINS1          | GINS complex subunit 1 (Psf1 homolog)                     | ENST00000262460 | -0,63895363  |
| A_23_P396062  | NM_021168                       | RAB40C         | RAB40C, member RAS oncogene family                        | ENST00000535977 | -0,638957615 |
| A_23_P135769  | NM_001101                       | ACTB           | actin, beta                                               | ENST00000445914 | -0,639067502 |
| A_23_P7896    | NM_020185                       | DUSP22         | dual specificity phosphatase 22                           | ENST00000344450 | -0,639120935 |
| A_23_P120316  | NM_006636                       | MTHFD2         | methylenetetrahydrofolate dehydrogenase (NADP+ depend     | ENST00000394053 | -0,639301169 |
| A_23_P118815  | NM_001012271                    | BIRC5          | baculoviral IAP repeat containing 5                       | ENST00000301633 | -0,639344039 |
| A_23_P109171  | NM_001195                       | BFSP1          | beaded filament structural protein 1, filensin            | ENST00000536626 | -0,639443756 |
| A_33_P3308586 | NM_001012729                    | DUXA           | double homeobox A                                         |                 | -0,63970941  |
| A_21_P0005946 | TCONS_00015340                  | XLOC_006912    |                                                           |                 | -0,639729449 |
| A_21_P0000618 | NR_033965                       | FLJ33065       | uncharacterized LOC440952                                 |                 | -0,639885926 |
| A_23_P41424   | NM_022154                       | SLC39A8        | solute carrier family 39 (zinc transporter), member 8     | ENST00000394833 | -0,639962813 |
| A_23_P7562    | NM_001009185                    | ACSL6          | acyl-CoA synthetase long-chain family member 6            | ENST00000544770 | -0,64000216  |

|                |                 |                |                                                               |                 |              |
|----------------|-----------------|----------------|---------------------------------------------------------------|-----------------|--------------|
| A_21_P0002532  | ENST00000420128 | XLOC_002452    |                                                               | ENST00000420128 | -0,640015939 |
| A_21_P0012487  | AW963197        | XLOC_l2_010511 |                                                               |                 | -0,640043192 |
| A_23_P206359   | NM_004360       | CDH1           | cadherin 1, type 1, E-cadherin (epithelial)                   | ENST00000261769 | -0,640183092 |
| A_23_P50096    | NM_001071       | TYMS           | thymidylate synthetase                                        | ENST00000323274 | -0,640209645 |
| A_23_P113701   | NM_002607       | PDGFA          | platelet-derived growth factor alpha polypeptide              | ENST00000402802 | -0,640244015 |
| A_21_P0010024  | TCONS_00028347  | XLOC_013696    |                                                               |                 | -0,640462238 |
| A_23_P113161   | NM_030806       | C1orf21        | chromosome 1 open reading frame 21                            | ENST00000235307 | -0,640577007 |
| A_23_P7313     | NM_001040058    | SPP1           | secreted phosphoprotein 1                                     | ENST00000360804 | -0,640753643 |
| A_23_P209426   | NM_015049       | TRAK2          | trafficking protein, kinesin binding 2                        | ENST00000332624 | -0,640868037 |
| A_23_P432947   | NM_013372       | GREM1          | gremlin 1                                                     | ENST00000300177 | -0,640894762 |
| A_21_P0005716  | ENST00000520273 | XKR9           | XK, Kell blood group complex subunit-related family, memb     | ENST00000520273 | -0,641019752 |
| A_33_P3273777  | NM_198568       | GJB7           | gap junction protein, beta 7, 25kDa                           | ENST00000296882 | -0,641194541 |
| A_23_P256107   | NM_006665       | HPSE           | heparanase                                                    | ENST00000507150 | -0,64119653  |
| A_33_P3412087  | NM_025059       | C6orf97        | chromosome 6 open reading frame 97                            | ENST00000367290 | -0,641208072 |
| A_23_P108751   | NM_001039492    | FHL2           | four and a half LIM domains 2                                 | ENST00000358129 | -0,641520498 |
| A_23_P394986   | NM_153836       | CREG2          | cellular repressor of E1A-stimulated genes 2                  | ENST00000324768 | -0,641615186 |
| A_33_P3223002  | NM_018485       | GPR77          | G protein-coupled receptor 77                                 | ENST00000257267 | -0,64164036  |
| A_23_P119266   | NM_001375       | DNASE2         | deoxyribonuclease II, lysosomal                               | ENST00000538460 | -0,641779122 |
| A_23_P118815   | NM_001012271    | BIRC5          | baculoviral IAP repeat containing 5                           | ENST00000301633 | -0,641831689 |
| A_23_P35609    | NM_000375       | UROS           | uroporphyrinogen III synthase                                 | ENST00000420761 | -0,641873076 |
| A_19_P00328832 | NR_026961       | LOC284837      | uncharacterized LOC284837                                     | ENST00000400385 | -0,642176095 |
| A_23_P169154   | NM_024896       | ERMP1          | endoplasmic reticulum metallopeptidase 1                      | ENST00000339450 | -0,64218461  |
| A_21_P0006571  | TCONS_00017457  | XLOC_008058    |                                                               |                 | -0,642203766 |
| A_33_P3281816  | NM_006367       | CAP1           | CAP, adenylate cyclase-associated protein 1 (yeast)           | ENST00000449311 | -0,642310212 |
| A_21_P0011514  | NM_001190790    | CDRT15L2       | CMT1A duplicated region transcript 15-like 2                  | ENST00000399044 | -0,642357269 |
| A_23_P425752   | NM_033219       | TRIM14         | tripartite motif containing 14                                | ENST00000342043 | -0,64240396  |
| A_23_P207911   | NM_016113       | TRPV2          | transient receptor potential cation channel, subfamily V, mem | ENST00000338560 | -0,642579198 |
| A_23_P318604   | ENST00000528663 | CYHR1          | cysteine/histidine-rich 1                                     | ENST00000528663 | -0,642703067 |
| A_23_P62115    | NM_003254       | TIMP1          | TIMP metallopeptidase inhibitor 1                             | ENST00000218388 | -0,642740715 |

|                |                 |              |                                                                       |                 |              |
|----------------|-----------------|--------------|-----------------------------------------------------------------------|-----------------|--------------|
| A_23_P115482   | NM_014176       | UBE2T        | ubiquitin-conjugating enzyme E2T (putative)                           | ENST00000367274 | -0,642755855 |
| A_23_P137366   | NM_000491       | C1QB         | complement component 1, q subcomponent, B chain                       | ENST00000314933 | -0,642764362 |
| A_24_P66001    | NM_001003684    | UQCRC10      | ubiquinol-cytochrome c reductase, complex III subunit X               | ENST00000401406 | -0,642906246 |
| A_33_P3239322  | AK125160        | LOC100132474 | uncharacterized LOC100132474                                          |                 | -0,643058876 |
| A_23_P67042    | NM_017947       | MOCOS        | molybdenum cofactor sulfurase                                         | ENST00000261326 | -0,643078221 |
| A_21_P0006796  | ENST00000414774 | XLOC_008970  |                                                                       | ENST00000414774 | -0,643175647 |
| A_23_P27584    | NM_001020818    | MYADM        | myeloid-associated differentiation marker                             | ENST00000391771 | -0,643190781 |
| A_33_P3373985  | XM_001718914    | LOC100130009 | high mobility group protein HMG-I/HMG-Y-like                          |                 | -0,643259867 |
| A_24_P287189   | NM_019009       | TOLLIP       | toll interacting protein                                              | ENST00000317204 | -0,643530145 |
| A_33_P3247644  | NM_152793       | C7orf41      | chromosome 7 open reading frame 41                                    | ENST00000324489 | -0,643573862 |
| A_23_P257111   | NM_000507       | FBP1         | fructose-1,6-bisphosphatase 1                                         | ENST00000415431 | -0,643576796 |
| A_24_P210829   | NM_005009       | NME4         | non-metastatic cells 4, protein expressed in                          | ENST00000460297 | -0,643594681 |
| A_23_P217379   | NM_033641       | COL4A6       | collagen, type IV, alpha 6                                            | ENST00000394872 | -0,643632586 |
| A_19_P00315668 | NM_022740       | HIPK2        | homeodomain interacting protein kinase 2                              | ENST00000406875 | -0,643764513 |
| A_32_P148710   | NM_005507       | CFL1         | cofilin 1 (non-muscle)                                                | ENST00000308162 | -0,643879986 |
| A_23_P41194    | NM_153353       | LRRC34       | leucine rich repeat containing 34                                     | ENST00000522329 | -0,64388092  |
| A_24_P328872   | NM_012073       | CCT5         | chaperonin containing TCP1, subunit 5 (epsilon)                       | ENST00000280326 | -0,644100419 |
| A_23_P79015    | NM_199037       | SCN1B        | sodium channel, voltage-gated, type I, beta                           | ENST00000415950 | -0,644137566 |
| A_24_P589266   | NM_001099289    | SH3RF3       | SH3 domain containing ring finger 3                                   | ENST00000444352 | -0,644307413 |
| A_33_P3344673  | NM_019121       | PPP1R37      | protein phosphatase 1, regulatory subunit 37                          | ENST00000421905 | -0,644324076 |
| A_33_P3420254  | NM_017802       | HEATR2       | HEAT repeat containing 2                                              | ENST00000313147 | -0,644532837 |
| A_23_P57413    | NM_014634       | PPM1F        | protein phosphatase, Mg <sup>2+</sup> /Mn <sup>2+</sup> dependent, 1F | ENST00000484588 | -0,644632096 |
| A_33_P3372004  | NM_005849       | IGSF6        | immunoglobulin superfamily, member 6                                  | ENST00000268389 | -0,644899148 |
| A_21_P0007660  | TCONS_00021252  | XLOC_009941  |                                                                       |                 | -0,645052453 |
| A_32_P172848   | NM_000167       | GK           | glycerol kinase                                                       | ENST00000471362 | -0,645072429 |
| A_23_P319792   | NM_019001       | XRN1         | 5'-3' exoribonuclease 1                                               | ENST00000264951 | -0,645121567 |
| A_24_P133488   | NM_017955       | CDCA4        | cell division cycle associated 4                                      | ENST00000392590 | -0,64513838  |
| A_32_P526255   | NM_001145717    | PNPLA1       | patatin-like phospholipase domain containing 1                        | ENST00000457797 | -0,645182927 |
| A_23_P385861   | NM_152562       | CDCA2        | cell division cycle associated 2                                      | ENST00000435898 | -0,645429775 |

|               |                 |                |                                                                       |                 |              |
|---------------|-----------------|----------------|-----------------------------------------------------------------------|-----------------|--------------|
| A_23_P11841   | NM_001684       | ATP2B4         | ATPase, Ca <sup>++</sup> transporting, plasma membrane 4              | ENST00000341360 | -0,645452427 |
| A_23_P118815  | NM_001012271    | BIRC5          | baculoviral IAP repeat containing 5                                   | ENST00000301633 | -0,645535136 |
| A_23_P26810   | NM_000546       | TP53           | tumor protein p53                                                     | ENST00000396473 | -0,645615807 |
| A_23_P82738   | NM_012415       | RAD54B         | RAD54 homolog B ( <i>S. cerevisiae</i> )                              | ENST00000546218 | -0,645631884 |
| A_23_P75867   | NM_207186       | OR10A4         | olfactory receptor, family 10, subfamily A, member 4                  | ENST00000379829 | -0,645689113 |
| A_23_P1320    | NM_021245       | MYOZ1          | myozenin 1                                                            | ENST00000359322 | -0,645725782 |
| A_24_P96780   | NM_016343       | CENPF          | centromere protein F, 350/400kDa (mitosin)                            | ENST00000391896 | -0,645998827 |
| A_23_P397238  | NM_054014       | FKBP1A         | FK506 binding protein 1A, 12kDa                                       | ENST00000381715 | -0,646022683 |
| A_21_P0007073 | TCONS_00018797  | XLOC_008583    |                                                                       |                 | -0,646043636 |
| A_24_P62615   | NM_006367       | CAP1           | CAP, adenylate cyclase-associated protein 1 (yeast)                   | ENST00000372792 | -0,646112234 |
| A_21_P0005115 | XM_003403441    | RAB44          | RAB44, member RAS oncogene family                                     |                 | -0,646174207 |
| A_33_P3217704 | NM_025182       | KIAA1539       | KIAA1539                                                              | ENST00000378566 | -0,646257247 |
| A_24_P238499  | NM_001012716    | C18orf56       | chromosome 18 open reading frame 56                                   | ENST00000323813 | -0,646473955 |
| A_24_P66027   | NM_004900       | APOBEC3B       | apolipoprotein B mRNA editing enzyme, catalytic polypeptide           | ENST00000335760 | -0,646605246 |
| A_23_P210869  | NM_032609       | COX4I2         | cytochrome c oxidase subunit IV isoform 2 (lung)                      | ENST00000376075 | -0,646773646 |
| A_21_P0011953 | ENST00000429980 | XLOC_I2_008214 |                                                                       | ENST00000429980 | -0,646792238 |
| A_24_P216421  | NM_033148       | DTNB           | dystrobrevin, beta                                                    | ENST00000535791 | -0,646795761 |
| A_23_P110624  | NM_001332       | CTNND2         | catenin (cadherin-associated protein), delta 2 (neural plakophilin 3) | ENST00000538638 | -0,646899107 |
| A_23_P356004  | NM_013434       | KCNIP3         | Kv channel interacting protein 3, calsenilin                          | ENST00000377181 | -0,646997842 |
| A_24_P346762  | NM_025182       | KIAA1539       | KIAA1539                                                              | ENST00000479357 | -0,647128733 |
| A_23_P120860  | NM_003634       | NIPSNAP1       | nipsnap homolog 1 ( <i>C. elegans</i> )                               | ENST00000216121 | -0,647291246 |
| A_33_P3343957 | NM_015252       | EHBP1          | EH domain binding protein 1                                           | ENST00000405015 | -0,647433208 |
| A_23_P114466  | NM_033284       | TBL1Y          | transducin (beta)-like 1, Y-linked                                    | ENST00000383032 | -0,647455424 |
| A_23_P356684  | NM_018685       | ANLN           | anillin, actin binding protein                                        | ENST00000491782 | -0,64755985  |
| A_23_P26810   | NM_000546       | TP53           | tumor protein p53                                                     | ENST00000396473 | -0,647719394 |
| A_23_P387537  | NM_024082       | PRRG3          | proline rich Gla (G-carboxyglutamic acid) 3 (transmembrane protein)   | ENST00000538575 | -0,647934812 |
| A_24_P380061  | NM_001025616    | ARHGAP24       | Rho GTPase activating protein 24                                      | ENST00000264343 | -0,648012196 |
| A_21_P0001976 | ENST00000455128 | XLOC_001897    |                                                                       | ENST00000455128 | -0,648075418 |
| A_21_P0010712 | ENST00000451023 | XLOC_I2_000342 |                                                                       | ENST00000451023 | -0,648214678 |



|               |                 |                |                                                                                     |                 |              |
|---------------|-----------------|----------------|-------------------------------------------------------------------------------------|-----------------|--------------|
| A_23_P72568   | NM_003794       | SNX4           | sorting nexin 4                                                                     | ENST00000251775 | -0,648298056 |
| A_23_P152284  | NM_024571       | SNRNP25        | small nuclear ribonucleoprotein 25kDa (U11/U12)                                     | ENST00000466183 | -0,648319554 |
| A_23_P62335   | NM_018196       | TMLHE          | trimethyllysine hydroxylase, epsilon                                                | ENST00000369439 | -0,648497887 |
| A_33_P3402354 | ENST00000238571 | YLPM1          | YLP motif containing 1                                                              | ENST00000238571 | -0,648499568 |
| A_24_P158089  | NM_000602       | SERPINE1       | serpin peptidase inhibitor, clade E (nexin, plasminogen activator inhibitor type 1) | ENST00000445463 | -0,648609594 |
| A_32_P447001  | NM_001198784    | FLJ27352       | uncharacterized LOC145788                                                           |                 | -0,648700235 |
| A_32_P158355  | NM_001015050    | ALG1L          | asparagine-linked glycosylation 1-like                                              | ENST00000532875 | -0,648832312 |
| A_24_P192262  | NM_005402       | RALA           | v-ral simian leukemia viral oncogene homolog A (ras related)                        | ENST0000005257  | -0,649060918 |
| A_23_P216966  | NM_000962       | PTGS1          | prostaglandin-endoperoxide synthase 1 (prostaglandin G/H and thromboxane synthase)  | ENST00000223423 | -0,649580563 |
| A_23_P122976  | NM_002069       | GNAI1          | guanine nucleotide binding protein (G protein), alpha inhibitory 1                  | ENST00000351004 | -0,649611074 |
| A_23_P119478  | NM_005755       | EBI3           | Epstein-Barr virus induced 3                                                        | ENST00000221847 | -0,649761984 |
| A_24_P117410  | NM_138433       | KLHDC7B        | kelch domain containing 7B                                                          | ENST00000395676 | -0,64977266  |
| A_33_P3659876 | NM_017760       | NCAPG2         | non-SMC condensin II complex, subunit G2                                            | ENST00000467785 | -0,649786141 |
| A_24_P354615  | NM_001040446    | MTMR12         | myotubularin related protein 12                                                     | ENST00000382142 | -0,649874809 |
| A_23_P119478  | NM_005755       | EBI3           | Epstein-Barr virus induced 3                                                        | ENST00000221847 | -0,650026894 |
| A_23_P211080  | NM_207585       | IFNAR2         | interferon (alpha, beta and omega) receptor 2                                       | ENST00000382241 | -0,650056498 |
| A_33_P3540143 | NM_014339       | IL17RA         | interleukin 17 receptor A                                                           | ENST00000319363 | -0,650175046 |
| A_23_P389692  | NM_020776       | KIAA1328       | KIAA1328                                                                            | ENST00000280020 | -0,650312922 |
| A_33_P3354181 | NM_020122       | KCMF1          | potassium channel modulatory factor 1                                               | ENST00000409785 | -0,650348948 |
| A_21_P0012818 | ENST00000502952 | XLOC_I2_011413 |                                                                                     | ENST00000502952 | -0,650382525 |
| A_33_P3232552 | NM_000857       | GUCY1B3        | guanylate cyclase 1, soluble, beta 3                                                | ENST00000264424 | -0,650437169 |
| A_33_P3279629 | NM_033199       | UCN2           | urocortin 2                                                                         | ENST00000273610 | -0,650521099 |
| A_23_P10305   | NM_175859       | CTPS2          | CTP synthase II                                                                     | ENST00000380207 | -0,650656191 |
| A_21_P0003689 | TCONS_00008357  | XLOC_003804    |                                                                                     |                 | -0,650674124 |
| A_33_P3269109 | NM_001130686    | GUCY1A3        | guanylate cyclase 1, soluble, alpha 3                                               | ENST00000512983 | -0,650678787 |
| A_21_P0001626 | ENST00000420762 | XLOC_001209    |                                                                                     | ENST00000420762 | -0,651049622 |
| A_23_P123071  | NM_001233       | CAV2           | caveolin 2                                                                          | ENST00000498493 | -0,651215039 |
| A_24_P115007  | NM_170740       | ALDH5A1        | aldehyde dehydrogenase 5 family, member A1                                          | ENST00000357578 | -0,651393683 |
| A_23_P33759   | NM_004753       | DHRS3          | dehydrogenase/reductase (SDR family) member 3                                       | ENST00000376223 | -0,651516273 |

|                |                 |              |                                                              |                 |              |
|----------------|-----------------|--------------|--------------------------------------------------------------|-----------------|--------------|
| A_24_P68908    | NR_033752       | LOC344887    | NmrA-like family domain containing 1 pseudogene              | ENST00000423298 | -0,651865799 |
| A_21_P0014351  | ENST00000451140 | LOC100506325 |                                                              | ENST00000451140 | -0,65192188  |
| A_23_P26810    | NM_000546       | TP53         | tumor protein p53                                            | ENST00000396473 | -0,652021693 |
| A_23_P115872   | NM_018131       | CEP55        | centrosomal protein 55kDa                                    | ENST00000371485 | -0,652433499 |
| A_21_P0006465  | ENST00000442841 | XLOC_008246  |                                                              | ENST00000442841 | -0,652486781 |
| A_33_P3479449  | AK055877        | LOC100506328 | uncharacterized LOC100506328                                 |                 | -0,652567032 |
| A_19_P00315790 | NR_034007       | LOC339894    | uncharacterized LOC339894                                    | ENST00000471357 | -0,652585872 |
| A_23_P348767   | NM_213631       | C20orf132    | chromosome 20 open reading frame 132                         | ENST00000400440 | -0,652624565 |
| A_24_P64167    | NM_000962       | PTGS1        | prostaglandin-endoperoxide synthase 1 (prostaglandin G/H     | ENST00000362012 | -0,652709752 |
| A_23_P154208   | NM_017567       | NAGK         | N-acetylglucosamine kinase                                   | ENST00000455197 | -0,652810266 |
| A_23_P26994    | NM_031498       | GNGT2        | guanine nucleotide binding protein (G protein), gamma trar   | ENST00000515635 | -0,652893661 |
| A_33_P3359368  | NM_001082488    | DHRS4L1      | dehydrogenase/reductase (SDR family) member 4 like 1         | ENST00000397065 | -0,653206398 |
| A_33_P3585268  | NM_002070       | GNAI2        | guanine nucleotide binding protein (G protein), alpha inhibi | ENST00000490122 | -0,65332744  |
| A_21_P0007187  | TCONS_00019257  | XLOC_009087  |                                                              |                 | -0,653350749 |
| A_23_P24444    | NM_001360       | DHCR7        | 7-dehydrocholesterol reductase                               | ENST00000355527 | -0,653507432 |
| A_23_P102471   | NM_000251       | MSH2         | mutS homolog 2, colon cancer, nonpolyposis type 1 (E. coli)  | ENST00000543555 | -0,653761981 |
| A_23_P104996   | NM_004183       | BEST1        | bestrophin 1                                                 | ENST00000524877 | -0,653896959 |
| A_24_P193943   | NM_176787       | PIGN         | phosphatidylinositol glycan anchor biosynthesis, class N     | ENST00000357637 | -0,653971548 |
| A_21_P0003999  | THC2620722      | XLOC_004382  |                                                              |                 | -0,654137682 |
| A_24_P202139   | NM_016025       | METTL9       | methyltransferase like 9                                     | ENST00000540294 | -0,654223915 |
| A_23_P113005   | NM_004428       | EFNA1        | ephrin-A1                                                    | ENST00000469878 | -0,654239735 |
| A_23_P100141   | NM_023076       | UNKL         | unkempt homolog (Drosophila)-like                            | ENST00000397464 | -0,654279474 |
| A_24_P271830   | NR_034145       | FLJ34690     | uncharacterized protein FLJ34690                             |                 | -0,654460748 |
| A_23_P114466   | NM_033284       | TBL1Y        | transducin (beta)-like 1, Y-linked                           | ENST00000383032 | -0,654512369 |
| A_23_P114466   | NM_033284       | TBL1Y        | transducin (beta)-like 1, Y-linked                           | ENST00000383032 | -0,654523752 |
| A_21_P0006526  | TCONS_00017291  | XLOC_008111  |                                                              |                 | -0,654709377 |
| A_19_P00316333 | NR_038956       | LOC100506714 | uncharacterized LOC100506714                                 |                 | -0,654850902 |
| A_23_P129717   | NM_080663       | ERI2         | ERI1 exoribonuclease family member 2                         | ENST00000300005 | -0,654875644 |
| A_23_P23584    | NM_020248       | CTNNBIP1     | catenin, beta interacting protein 1                          | ENST00000377263 | -0,65494067  |

|               |                 |             |                                                                    |                 |              |
|---------------|-----------------|-------------|--------------------------------------------------------------------|-----------------|--------------|
| A_33_P3313796 | NM_030771       | CCDC34      | coiled-coil domain containing 34                                   | ENST00000328697 | -0,654988329 |
| A_33_P3839760 | NM_017914       | C19orf24    | chromosome 19 open reading frame 24                                | ENST00000416408 | -0,655043484 |
| A_23_P24784   | NM_003282       | TNNI2       | troponin I type 2 (skeletal, fast)                                 | ENST00000381906 | -0,655123551 |
| A_24_P406060  | NM_182757       | RNF144B     | ring finger protein 144B                                           | ENST00000259939 | -0,6551292   |
| A_23_P39386   | NM_014266       | HCST        | hematopoietic cell signal transducer                               | ENST00000246551 | -0,655183186 |
| A_23_P10647   | NM_018659       | CYTL1       | cytokine-like 1                                                    | ENST00000307746 | -0,655311377 |
| A_32_P165113  | NM_138458       | WDR92       | WD repeat domain 92                                                | ENST00000406334 | -0,655319888 |
| A_21_P0013802 | NM_018196       | TMLHE       | trimethyllysine hydroxylase, epsilon                               | ENST00000334398 | -0,655361439 |
| A_23_P26810   | NM_000546       | TP53        | tumor protein p53                                                  | ENST00000396473 | -0,655451932 |
| A_23_P50946   | NM_005855       | RAMP1       | receptor (G protein-coupled) activity modifying protein 1          | ENST00000254661 | -0,655487824 |
| A_32_P95739   | NM_000365       | TPI1        | triosephosphate isomerase 1                                        | ENST00000535434 | -0,655663709 |
| A_24_P191312  | NM_003038       | SLC1A4      | solute carrier family 1 (glutamate/neutral amino acid transporter) | ENST00000480594 | -0,655784774 |
| A_23_P78867   | NM_000540       | RYR1        | ryanodine receptor 1 (skeletal)                                    | ENST00000359596 | -0,655811447 |
| A_23_P100141  | NM_023076       | UNKL        | unkempt homolog (Drosophila)-like                                  | ENST00000397464 | -0,655860172 |
| A_24_P743869  | NM_001195304    | BBIP1       | BBSome interacting protein 1                                       | ENST00000448814 | -0,656014876 |
| A_21_P0004007 | ENST00000515077 | XLOC_004410 |                                                                    | ENST00000515077 | -0,656023878 |
| A_21_P0000607 | NR_033839       | FLJ39051    | uncharacterized LOC399972                                          |                 | -0,656063667 |
| A_21_P0013023 | AK125083        | RAB44       | RAB44, member RAS oncogene family                                  |                 | -0,656107977 |
| A_24_P85775   | NM_001039477    | C1orf38     | chromosome 1 open reading frame 38                                 | ENST00000373927 | -0,656148976 |
| A_23_P116829  | NM_003348       | UBE2N       | ubiquitin-conjugating enzyme E2N                                   | ENST00000318066 | -0,656200085 |
| A_23_P115872  | NM_018131       | CEP55       | centrosomal protein 55kDa                                          | ENST00000371485 | -0,656206374 |
| A_23_P116829  | NM_003348       | UBE2N       | ubiquitin-conjugating enzyme E2N                                   | ENST00000318066 | -0,656614866 |
| A_21_P0008555 | AK056686        | XLOC_011237 |                                                                    |                 | -0,656763757 |
| A_23_P119778  | NM_020342       | SLC39A10    | solute carrier family 39 (zinc transporter), member 10             | ENST00000409086 | -0,656893169 |
| A_23_P258493  | NM_005573       | LMNB1       | lamin B1                                                           | ENST00000460265 | -0,657043037 |
| A_23_P42004   | NM_033125       | SLC22A16    | solute carrier family 22 (organic cation/carnitine transporter)    | ENST00000330550 | -0,657070895 |
| A_23_P301021  | NM_004319       | ASTN1       | astrotactin 1                                                      | ENST00000367654 | -0,657143281 |
| A_21_P0003036 | TCONS_00006248  | XLOC_002841 |                                                                    |                 | -0,657442184 |
| A_33_P3352877 | NM_015087       | SPG20       | spastic paraplegia 20 (Troyer syndrome)                            | ENST00000423217 | -0,657557171 |

|               |                  |                |                                                         |                 |              |
|---------------|------------------|----------------|---------------------------------------------------------|-----------------|--------------|
| A_32_P21255   | NM_013309        | SLC30A4        | solute carrier family 30 (zinc transporter), member 4   | ENST00000261867 | -0,657574412 |
| A_21_P0004919 | TCONS_00011916   | XLOC_005424    |                                                         |                 | -0,657708393 |
| A_23_P120860  | NM_003634        | NIPSNAP1       | nipsnap homolog 1 (C. elegans)                          | ENST00000216121 | -0,657874111 |
| A_33_P3369452 | NM_152906        | C22orf25       | chromosome 22 open reading frame 25                     | ENST00000399807 | -0,657913544 |
| A_24_P393740  | NM_001465        | FYB            | FYN binding protein                                     | ENST00000351578 | -0,65792826  |
| A_23_P109171  | NM_001195        | BFSP1          | beaded filament structural protein 1, filensin          | ENST00000536626 | -0,657932088 |
| A_24_P941217  | ENST00000321276  | SGPP2          | sphingosine-1-phosphate phosphatase 2                   | ENST00000321276 | -0,658141792 |
| A_23_P91640   | NM_020437        | ASPHD2         | aspartate beta-hydroxylase domain containing 2          | ENST00000215906 | -0,658208376 |
| A_21_P0014880 | XR_132792        | LOC100652751   | uncharacterized LOC100652751                            |                 | -0,658292419 |
| A_33_P3217393 | NM_001024736     | CD276          | CD276 molecule                                          | ENST00000379823 | -0,658299485 |
| A_24_P601972  | NM_001143959     | C2orf74        | chromosome 2 open reading frame 74                      | ENST00000398622 | -0,658385686 |
| A_33_P3210671 | NM_207328        | GPAT2          | glycerol-3-phosphate acyltransferase 2, mitochondrial   | ENST00000458519 | -0,658559701 |
| A_23_P120467  | NM_199427        | ZFP64          | zinc finger protein 64 homolog (mouse)                  | ENST00000361387 | -0,658719956 |
| A_23_P329573  | NM_000211        | ITGB2          | integrin, beta 2 (complement component 3 receptor 3 and | ENST00000302347 | -0,658802933 |
| A_33_P3315223 | NM_006805        | HNRNPAO        | heterogeneous nuclear ribonucleoprotein A0              | ENST00000314940 | -0,658828546 |
| A_21_P0009831 | ENST00000432334  | XLOC_013475    |                                                         | ENST00000432334 | -0,658840006 |
| A_23_P119478  | NM_005755        | EBI3           | Epstein-Barr virus induced 3                            | ENST00000221847 | -0,658951288 |
| A_23_P161190  | NM_003380        | VIM            | vimentin                                                | ENST00000544301 | -0,659116024 |
| A_32_P176911  | NR_026774        | LINC00239      | long intergenic non-protein coding RNA 239              | ENST00000556973 | -0,659200358 |
| A_23_P121564  | NM_000857        | GUCY1B3        | guanylate cyclase 1, soluble, beta 3                    | ENST00000264424 | -0,65926067  |
| A_23_P216610  | NM_022486        | SUSD1          | sushi domain containing 1                               | ENST00000374270 | -0,659623434 |
| A_23_P103775  | NM_032270        | LRRRC8C        | leucine rich repeat containing 8 family, member C       | ENST00000370454 | -0,659624241 |
| A_23_P156739  | NM_032340        | C6orf125       | chromosome 6 open reading frame 125                     | ENST00000374231 | -0,659997324 |
| A_21_P0012838 | TCONS_I2_0002244 | XLOC_I2_011692 |                                                         |                 | -0,660030467 |
| A_23_P100127  | NM_170589        | CASC5          | cancer susceptibility candidate 5                       | ENST00000260369 | -0,66003188  |
| A_33_P3329644 | NM_001136152     | ALG1L2         | asparagine-linked glycosylation 1-like 2                | ENST00000425059 | -0,660272341 |
| A_21_P0012575 | TCONS_I2_0002044 | XLOC_I2_010601 |                                                         |                 | -0,660417344 |
| A_33_P3363168 | NM_033389        | SSH2           | slingshot homolog 2 (Drosophila)                        | ENST00000269033 | -0,660559648 |
| A_24_P192727  | ENST00000313664  | KAZALD1        | Kazal-type serine peptidase inhibitor domain 1          | ENST00000313664 | -0,660569931 |

|               |                  |                |                                                        |                 |              |
|---------------|------------------|----------------|--------------------------------------------------------|-----------------|--------------|
| A_33_P3326647 | ENST00000342528  | OTOG           | otogelin                                               | ENST00000342528 | -0,660684189 |
| A_23_P120467  | NM_199427        | ZFP64          | zinc finger protein 64 homolog (mouse)                 | ENST00000361387 | -0,660733796 |
| A_21_P0003078 | THC2635016       | XLOC_002968    |                                                        |                 | -0,660843462 |
| A_23_P118815  | NM_001012271     | BIRC5          | baculoviral IAP repeat containing 5                    | ENST00000301633 | -0,660927    |
| A_23_P119478  | NM_005755        | EBI3           | Epstein-Barr virus induced 3                           | ENST00000221847 | -0,66104755  |
| A_24_P141736  | NM_006838        | METAP2         | methionyl aminopeptidase 2                             | ENST00000323666 | -0,661064611 |
| A_33_P3818787 | NR_027277        | LOC344967      | acyl-CoA thioesterase 7 pseudogene                     | ENST00000381811 | -0,661106209 |
| A_23_P124252  | NM_020397        | CAMK1D         | calcium/calmodulin-dependent protein kinase ID         | ENST00000378845 | -0,661117239 |
| A_23_P88678   | NM_152335        | C15orf27       | chromosome 15 open reading frame 27                    | ENST00000484722 | -0,661453332 |
| A_23_P2616    | NM_130441        | CLEC4C         | C-type lectin domain family 4, member C                | ENST00000360345 | -0,661487565 |
| A_23_P215634  | NM_001013398     | IGFBP3         | insulin-like growth factor binding protein 3           | ENST00000438491 | -0,661663224 |
| A_24_P313418  | NM_002990        | CCL22          | chemokine (C-C motif) ligand 22                        | ENST00000219235 | -0,661702003 |
| A_24_P409330  | NM_181304        | MRPL52         | mitochondrial ribosomal protein L52                    | ENST00000553711 | -0,661724591 |
| A_21_P0013500 | THC2645076       | XLOC_I2_014294 |                                                        |                 | -0,661869993 |
| A_23_P80032   | NM_005225        | E2F1           | E2F transcription factor 1                             | ENST00000343380 | -0,661894021 |
| A_33_P3753757 | AK095652         | LOC158402      | uncharacterized LOC158402                              |                 | -0,662011012 |
| A_23_P217339  | NM_005044        | PRKX           | protein kinase, X-linked                               | ENST00000262848 | -0,662121064 |
| A_21_P0013286 | TCONS_I2_0002641 | XLOC_I2_013737 |                                                        |                 | -0,662231698 |
| A_33_P3336780 | NM_007188        | ABCB8          | ATP-binding cassette, sub-family B (MDR/TAP), member 8 | ENST00000358849 | -0,662238835 |
| A_24_P7121    | NM_024677        | NSUN7          | NOP2/Sun domain family, member 7                       | ENST00000381782 | -0,662240838 |
| A_23_P31143   | NM_001003395     | TPD52L1        | tumor protein D52-like 1                               | ENST00000392482 | -0,662329217 |
| A_23_P118815  | NM_001012271     | BIRC5          | baculoviral IAP repeat containing 5                    | ENST00000301633 | -0,662384436 |
| A_23_P1492    | NM_021732        | AVPI1          | arginine vasopressin-induced 1                         | ENST00000370626 | -0,662571014 |
| A_23_P70231   | NM_001182        | ALDH7A1        | aldehyde dehydrogenase 7 family, member A1             | ENST00000497231 | -0,662754819 |
| A_23_P101521  | NM_152358        | IZUMO2         | IZUMO family member 2                                  | ENST00000486050 | -0,66283037  |
| A_23_P48056   | NM_006825        | CKAP4          | cytoskeleton-associated protein 4                      | ENST00000378026 | -0,66308032  |
| A_23_P348749  | NM_145025        | AKD1           | adenylate kinase domain containing 1                   | ENST00000285397 | -0,663105807 |
| A_23_P108823  | NM_032523        | OSBPL6         | oxysterol binding protein-like 6                       | ENST00000315022 | -0,663129787 |
| A_21_P0002658 | NR_037631        | LOC100288911   | uncharacterized LOC100288911                           |                 | -0,663387365 |



|                |                  |                |                                                               |                 |              |
|----------------|------------------|----------------|---------------------------------------------------------------|-----------------|--------------|
| A_23_P329573   | NM_000211        | ITGB2          | integrin, beta 2 (complement component 3 receptor 3 and       | ENST00000302347 | -0,663507397 |
| A_21_P0000748  | NR_038280        | LOC100506963   | uncharacterized LOC100506963                                  | ENST00000427796 | -0,663726007 |
| A_23_P352266   | NM_000633        | BCL2           | B-cell CLL/lymphoma 2                                         | ENST00000398117 | -0,663819337 |
| A_23_P137423   | NM_052868        | IGSF8          | immunoglobulin superfamily, member 8                          | ENST00000358475 | -0,663869369 |
| A_23_P303455   | NM_153832        | GPR161         | G protein-coupled receptor 161                                | ENST00000367835 | -0,663895362 |
| A_33_P3352827  | NM_003037        | SLAMF1         | signaling lymphocytic activation molecule family member 1     | ENST00000355199 | -0,663972902 |
| A_21_P0013513  | TCONS_I2_0002818 | XLOC_I2_014505 |                                                               |                 | -0,664057447 |
| A_23_P38959    | NM_005428        | VAV1           | vav 1 guanine nucleotide exchange factor                      | ENST00000304076 | -0,664177293 |
| A_23_P119478   | NM_005755        | EBI3           | Epstein-Barr virus induced 3                                  | ENST00000221847 | -0,664181102 |
| A_33_P3281995  | AK129682         | LOC100507236   | uncharacterized protein LOC100507236                          |                 | -0,664212376 |
| A_23_P154457   | NM_024894        | NOL10          | nucleolar protein 10                                          | ENST00000345985 | -0,664241181 |
| A_19_P00327354 | AK057050         | XLOC_I2_015037 |                                                               |                 | -0,664275035 |
| A_24_P293530   | NM_178033        | CYP4X1         | cytochrome P450, family 4, subfamily X, polypeptide 1         | ENST00000538609 | -0,664290049 |
| A_24_P626850   | NM_004285        | H6PD           | hexose-6-phosphate dehydrogenase (glucose 1-dehydroger        | ENST00000377403 | -0,664328637 |
| A_23_P101319   | NM_152354        | ZNF285         | zinc finger protein 285                                       | ENST00000544719 | -0,664373466 |
| A_23_P36641    | NM_020661        | AICDA          | activation-induced cytidine deaminase                         | ENST00000229335 | -0,664420584 |
| A_23_P10647    | NM_018659        | CYTL1          | cytokine-like 1                                               | ENST00000307746 | -0,664557921 |
| A_23_P119478   | NM_005755        | EBI3           | Epstein-Barr virus induced 3                                  | ENST00000221847 | -0,664589036 |
| A_33_P3235321  | NM_032872        | SYTL1          | synaptotagmin-like 1                                          | ENST00000496001 | -0,664635793 |
| A_23_P22224    | NM_004095        | EIF4EBP1       | eukaryotic translation initiation factor 4E binding protein 1 | ENST00000338825 | -0,664768862 |
| A_23_P108751   | NM_001039492     | FHL2           | four and a half LIM domains 2                                 | ENST00000358129 | -0,664965663 |
| A_23_P329573   | NM_000211        | ITGB2          | integrin, beta 2 (complement component 3 receptor 3 and       | ENST00000302347 | -0,664974271 |
| A_23_P156687   | NM_001710        | CFB            | complement factor B                                           | ENST00000546515 | -0,665169709 |
| A_24_P941268   | NM_007220        | CA5B           | carbonic anhydrase VB, mitochondrial                          | ENST00000318636 | -0,665264316 |
| A_24_P38754    | NM_018464        | CISD1          | CDGSH iron sulfur domain 1                                    | ENST00000333926 | -0,665264807 |
| A_33_P3537861  | EF565113         | LOC100126448   | uncharacterized LOC100126448                                  |                 | -0,665273654 |
| A_33_P3391290  | NM_001142483     | C5orf13        | chromosome 5 open reading frame 13                            | ENST00000507742 | -0,665612913 |
| A_24_P382026   | NM_020679        | MIF4GD         | MIF4G domain containing                                       | ENST00000325102 | -0,665703936 |
| A_23_P147711   | NM_000906        | NPR1           | natriuretic peptide receptor A/guanylate cyclase A (atrionat  | ENST00000428723 | -0,665821094 |

|                |                |              |                                                         |                 |              |
|----------------|----------------|--------------|---------------------------------------------------------|-----------------|--------------|
| A_23_P91140    | NM_018441      | PECR         | peroxisomal trans-2-enoyl-CoA reductase                 | ENST00000461330 | -0,665941088 |
| A_24_P346431   | NM_022748      | TNS3         | tensin 3                                                | ENST00000398879 | -0,666034036 |
| A_33_P3339212  | NM_004237      | TRIP13       | thyroid hormone receptor interactor 13                  | ENST00000166345 | -0,666053847 |
| A_33_P3250398  | BC025419       | CTSZ         | cathepsin Z                                             |                 | -0,666127606 |
| A_33_P3305731  | NM_025176      | NINL         | ninein-like                                             | ENST00000278886 | -0,666183795 |
| A_23_P100141   | NM_023076      | UNKL         | unkempt homolog (Drosophila)-like                       | ENST00000397464 | -0,666252887 |
| A_24_P931443   | NM_003485      | GPR68        | G protein-coupled receptor 68                           | ENST00000535815 | -0,666373782 |
| A_21_P0001464  | BI084121       | XLOC_000697  |                                                         |                 | -0,666472578 |
| A_24_P33982    | NM_001085423   | MILR1        | mast cell immunoglobulin-like receptor 1                |                 | -0,666532421 |
| A_23_P104972   | NM_023945      | MS4A5        | membrane-spanning 4-domains, subfamily A, member 5      | ENST00000300190 | -0,666583227 |
| A_19_P00321148 | AK055877       | LOC100506328 | uncharacterized LOC100506328                            |                 | -0,66687859  |
| A_23_P118815   | NM_001012271   | BIRC5        | baculoviral IAP repeat containing 5                     | ENST00000301633 | -0,667064026 |
| A_21_P0003095  | TCONS_00006387 | XLOC_003006  |                                                         |                 | -0,667135019 |
| A_23_P210482   | NM_000022      | ADA          | adenosine deaminase                                     | ENST00000464097 | -0,667647502 |
| A_32_P107493   | NM_153025      | C16orf55     | chromosome 16 open reading frame 55                     | ENST00000301031 | -0,667869195 |
| A_24_P270144   | NM_001040034   | CD63         | CD63 molecule                                           | ENST00000551173 | -0,667950763 |
| A_32_P162374   | NM_173529      | C18orf54     | chromosome 18 open reading frame 54                     | ENST00000300091 | -0,668006484 |
| A_23_P70688    | NM_004271      | LY86         | lymphocyte antigen 86                                   | ENST00000230568 | -0,668094338 |
| A_23_P123596   | NM_000170      | GLDC         | glycine dehydrogenase (decarboxylating)                 | ENST00000321612 | -0,66849557  |
| A_23_P114983   | NM_032588      | TRIM63       | tripartite motif containing 63                          | ENST00000374272 | -0,668681675 |
| A_33_P3334908  | NM_145177      | DHRX         | dehydrogenase/reductase (SDR family) X-linked           | ENST00000334651 | -0,668917347 |
| A_23_P329573   | NM_000211      | ITGB2        | integrin, beta 2 (complement component 3 receptor 3 and | ENST00000302347 | -0,668941476 |
| A_33_P3316147  | NM_001005504   | OR4F21       | olfactory receptor, family 4, subfamily F, member 21    | ENST00000320901 | -0,669353153 |
| A_23_P146551   | NM_024761      | MOB3B        | MOB kinase activator 3B                                 | ENST00000262244 | -0,669684298 |
| A_23_P118      | NM_001439      | EXTL2        | exostoses (multiple)-like 2                             | ENST00000370114 | -0,669720487 |
| A_23_P329573   | NM_000211      | ITGB2        | integrin, beta 2 (complement component 3 receptor 3 and | ENST00000302347 | -0,669907864 |
| A_24_P159434   | NM_007261      | CD300A       | CD300a molecule                                         | ENST00000361933 | -0,669954412 |
| A_23_P46351    | NM_006862      | TDRKH        | tudor and KH domain containing                          | ENST00000440583 | -0,670039642 |
| A_21_P0009346  | TCONS_00025730 | XLOC_012551  |                                                         |                 | -0,670041958 |

|                |                 |                |                                                                                                       |                 |              |
|----------------|-----------------|----------------|-------------------------------------------------------------------------------------------------------|-----------------|--------------|
| A_33_P3353791  | NM_181501       | ITGA1          | integrin, alpha 1                                                                                     | ENST00000506275 | -0,670064989 |
| A_21_P0010326  | TCONS_00029312  | XLOC_014110    |                                                                                                       |                 | -0,670071347 |
| A_23_P65386    | NM_023112       | OTUB2          | OTU domain, ubiquitin aldehyde binding 2                                                              | ENST00000203664 | -0,67014351  |
| A_23_P118815   | NM_001012271    | BIRC5          | baculoviral IAP repeat containing 5                                                                   | ENST00000301633 | -0,670258548 |
| A_23_P137665   | NM_001276       | CHI3L1         | chitinase 3-like 1 (cartilage glycoprotein-39)                                                        | ENST00000404436 | -0,670397598 |
| A_33_P3446495  | NM_015123       | FRMD4B         | FERM domain containing 4B                                                                             | ENST00000542259 | -0,670457802 |
| A_23_P17012    | NM_024583       | SCRN3          | secernin 3                                                                                            | ENST00000272732 | -0,670495563 |
| A_23_P104996   | NM_004183       | BEST1          | bestrophin 1                                                                                          | ENST00000524877 | -0,670584153 |
| A_23_P204947   | NM_004004       | GJB2           | gap junction protein, beta 2, 26kDa                                                                   | ENST00000382844 | -0,670641368 |
| A_33_P3210488  | NM_004369       | COL6A3         | collagen, type VI, alpha 3                                                                            | ENST00000346358 | -0,670672636 |
| A_23_P201628   | NM_002293       | LAMC1          | laminin, gamma 1 (formerly LAMB2)                                                                     | ENST00000258341 | -0,670799167 |
| A_21_P0002950  | TCONS_00005996  | XLOC_002621    |                                                                                                       |                 | -0,670815652 |
| A_23_P370682   | NM_138456       | BATF2          | basic leucine zipper transcription factor, ATF-like 2                                                 | ENST00000527454 | -0,67093416  |
| A_23_P340333   | NM_033397       | ITPRIP         | inositol 1,4,5-trisphosphate receptor interacting protein                                             | ENST00000358187 | -0,671207039 |
| A_23_P58321    | NM_001237       | CCNA2          | cyclin A2                                                                                             | ENST00000274026 | -0,671263916 |
| A_19_P00317053 | TCONS_00012259  | XLOC_005810    |                                                                                                       |                 | -0,671346782 |
| A_23_P100141   | NM_023076       | UNKL           | unkempt homolog (Drosophila)-like                                                                     | ENST00000397464 | -0,671356865 |
| A_23_P200222   | NM_033300       | LRP8           | low density lipoprotein receptor-related protein 8, apolipoprotein E receptor type 2 class B member 1 | ENST00000306052 | -0,671363229 |
| A_21_P0012359  | ENST00000423311 | XLOC_I2_009539 |                                                                                                       | ENST00000423311 | -0,671410772 |
| A_23_P122052   | NM_001008397    | GPX8           | glutathione peroxidase 8 (putative)                                                                   | ENST00000503787 | -0,67146676  |
| A_23_P119778   | NM_020342       | SLC39A10       | solute carrier family 39 (zinc transporter), member 10                                                | ENST00000409086 | -0,671487294 |
| A_19_P00318904 | XR_108784       | LOC100507525   |                                                                                                       |                 | -0,6718008   |
| A_24_P154948   | NM_002047       | GARS           | glycyl-tRNA synthetase                                                                                | ENST00000470392 | -0,671915308 |
| A_23_P57856    | NM_001130845    | BCL6           | B-cell CLL/lymphoma 6                                                                                 | ENST00000419510 | -0,671945922 |
| A_23_P390172   | NM_021133       | RNASEL         | ribonuclease L (2',5'-oligoadenylate synthetase-dependent)                                            | ENST00000444138 | -0,672223211 |
| A_33_P3355090  | NM_080656       | CDKN2AIPNL     | CDKN2A interacting protein N-terminal like                                                            | ENST00000458198 | -0,672371059 |
| A_33_P3454679  | BU190374        | HAB1           | B1 for mucin                                                                                          |                 | -0,672393975 |
| A_23_P359043   | NM_001004065    | AKAP2          | A kinase (PRKA) anchor protein 2                                                                      | ENST00000374530 | -0,672398274 |
| A_23_P139669   | NM_006931       | SLC2A3         | solute carrier family 2 (facilitated glucose transporter), member 3                                   | ENST00000479059 | -0,672443063 |

|               |                 |                |                                                                |                 |              |
|---------------|-----------------|----------------|----------------------------------------------------------------|-----------------|--------------|
| A_24_P60441   | NM_153717       | EVC            | Ellis van Creveld syndrome                                     | ENST00000264956 | -0,672464283 |
| A_23_P70007   | NM_012484       | HMMR           | hyaluronan-mediated motility receptor (RHAMM)                  | ENST00000393915 | -0,672659701 |
| A_23_P120467  | NM_199427       | ZFP64          | zinc finger protein 64 homolog (mouse)                         | ENST00000361387 | -0,672911629 |
| A_33_P3400258 | NM_207321       | C10orf129      | chromosome 10 open reading frame 129                           | ENST00000404473 | -0,673029401 |
| A_23_P124122  | NM_018663       | PXMP2          | peroxisomal membrane protein 2, 22kDa                          | ENST00000317479 | -0,673078244 |
| A_21_P0009619 | AK127565        | FLJ37638       | uncharacterized LOC400660                                      |                 | -0,673112066 |
| A_23_P122976  | NM_002069       | GNAI1          | guanine nucleotide binding protein (G protein), alpha inhibi   | ENST00000351004 | -0,673346365 |
| A_23_P69109   | NM_021105       | PLSCR1         | phospholipid scramblase 1                                      | ENST00000448205 | -0,673405817 |
| A_21_P0010522 | ENST00000451482 | XLOC_l2_000116 |                                                                | ENST00000451482 | -0,673446813 |
| A_23_P137391  | NM_001428       | ENO1           | enolase 1, (alpha)                                             | ENST00000464920 | -0,673461413 |
| A_23_P108751  | NM_001039492    | FHL2           | four and a half LIM domains 2                                  | ENST00000358129 | -0,673540434 |
| A_23_P11841   | NM_001684       | ATP2B4         | ATPase, Ca <sup>++</sup> transporting, plasma membrane 4       | ENST00000341360 | -0,673621975 |
| A_33_P3231653 | NM_016548       | GOLM1          | golgi membrane protein 1                                       | ENST00000388711 | -0,673740665 |
| A_23_P160159  | NM_003039       | SLC2A5         | solute carrier family 2 (facilitated glucose/fructose transpor | ENST00000377424 | -0,673773187 |
| A_21_P0005835 | NR_038236       | LOC100507632   | uncharacterized LOC100507632                                   | ENST00000499425 | -0,674281548 |
| A_21_P0010128 | TCONS_00028722  | XLOC_013827    |                                                                |                 | -0,674318843 |
| A_33_P3346338 | NM_001145088    | WDR67          | WD repeat domain 67                                            | ENST00000378080 | -0,674565805 |
| A_21_P0006859 | TCONS_00018165  | XLOC_008456    |                                                                |                 | -0,674616871 |
| A_32_P133072  | NM_006108       | SPON1          | spondin 1, extracellular matrix protein                        | ENST00000533633 | -0,674742195 |
| A_23_P156826  | NM_032744       | C6orf105       | chromosome 6 open reading frame 105                            | ENST00000514824 | -0,674868196 |
| A_23_P118815  | NM_001012271    | BIRC5          | baculoviral IAP repeat containing 5                            | ENST00000301633 | -0,675034259 |
| A_23_P10647   | NM_018659       | CYTL1          | cytokine-like 1                                                | ENST00000307746 | -0,675113038 |
| A_23_P26629   | NM_013258       | PYCARD         | PYD and CARD domain containing                                 | ENST00000355986 | -0,675321863 |
| A_23_P114466  | NM_033284       | TBL1Y          | transducin (beta)-like 1, Y-linked                             | ENST00000383032 | -0,675350014 |
| A_21_P0001646 | TCONS_00001887  | XLOC_001266    |                                                                |                 | -0,675353338 |
| A_23_P97932   | NM_012228       | MSRB2          | methionine sulfoxide reductase B2                              | ENST00000468633 | -0,675386586 |
| A_21_P0014022 | XM_003403500    | RBSG2          | retinoblastoma-specific gene 2                                 |                 | -0,675609189 |
| A_33_P3414591 | NM_000474       | TWIST1         | twist homolog 1 (Drosophila)                                   | ENST00000354571 | -0,675616796 |
| A_23_P110052  | NM_023067       | FOXL2          | forkhead box L2                                                | ENST00000542203 | -0,675866545 |

|               |                 |                |                                                           |                 |              |
|---------------|-----------------|----------------|-----------------------------------------------------------|-----------------|--------------|
| A_33_P3416286 | NM_006047       | RBM12          | RNA binding motif protein 12                              | ENST00000359646 | -0,675899297 |
| A_23_P59637   | NM_014705       | DOCK4          | dedicator of cytokinesis 4                                | ENST00000352877 | -0,675928444 |
| A_24_P278299  | NM_024701       | ASB13          | ankyrin repeat and SOCS box containing 13                 | ENST00000459912 | -0,675946607 |
| A_23_P119478  | NM_005755       | EBI3           | Epstein-Barr virus induced 3                              | ENST00000221847 | -0,676013988 |
| A_23_P134477  | NM_032350       | C7orf50        | chromosome 7 open reading frame 50                        | ENST00000397098 | -0,676199539 |
| A_21_P0010039 | THC2657240      | XLOC_013743    |                                                           |                 | -0,676227942 |
| A_21_P0013088 | NM_004595       | SMS            | spermine synthase                                         | ENST00000457085 | -0,67639608  |
| A_23_P126416  | NM_005424       | TIE1           | tyrosine kinase with immunoglobulin-like and EGF-like dom | ENST00000433781 | -0,676398039 |
| A_23_P106405  | NM_002487       | NDN            | necdin homolog (mouse)                                    | ENST00000331837 | -0,676545185 |
| A_23_P97632   | NM_004446       | EPRS           | glutamyl-prolyl-tRNA synthetase                           | ENST00000468487 | -0,676666009 |
| A_23_P381577  | NM_145011       | ZNF25          | zinc finger protein 25                                    | ENST00000302609 | -0,676666762 |
| A_21_P0011948 | ENST00000439362 | XLOC_I2_008203 |                                                           | ENST00000439362 | -0,676839787 |
| A_33_P3247331 | ENST00000345015 | KCNQ1          | potassium voltage-gated channel, KQT-like subfamily, mem  | ENST00000345015 | -0,676921091 |
| A_33_P3382177 | NM_003255       | TIMP2          | TIMP metalloproteinase inhibitor 2                        | ENST00000262768 | -0,677002302 |
| A_23_P209678  | NM_002664       | PLEK           | pleckstrin                                                | ENST00000234313 | -0,677010351 |
| A_33_P3400334 | AK127532        | LOC100130372   | uncharacterized LOC100130372                              |                 | -0,677095135 |
| A_33_P3333627 | NM_030948       | PHACTR1        | phosphatase and actin regulator 1                         | ENST00000406205 | -0,677325805 |
| A_23_P80032   | NM_005225       | E2F1           | E2F transcription factor 1                                | ENST00000343380 | -0,677557329 |
| A_23_P50368   | NM_206818       | OSCAR          | osteoclast associated, immunoglobulin-like receptor       | ENST00000358375 | -0,677702563 |
| A_23_P106661  | NM_052999       | CMTM1          | CKLF-like MARVEL transmembrane domain containing 1        | ENST00000379490 | -0,677992566 |
| A_24_P541831  | NR_026793       | LINC00264      | long intergenic non-protein coding RNA 264                | ENST00000412114 | -0,678203644 |
| A_33_P3276678 | NM_199425       | VSX1           | visual system homeobox 1                                  | ENST00000376707 | -0,678237665 |
| A_23_P117852  | NM_014736       | KIAA0101       | KIAA0101                                                  | ENST00000380258 | -0,678350996 |
| A_33_P3280044 | NM_013275       | ANKRD11        | ankyrin repeat domain 11                                  | ENST00000378332 | -0,67835671  |
| A_23_P103486  | NM_000775       | CYP2J2         | cytochrome P450, family 2, subfamily J, polypeptide 2     | ENST00000469406 | -0,678453316 |
| A_33_P3261982 | NM_000947       | PRIM2          | primase, DNA, polypeptide 2 (58kDa)                       | ENST00000389488 | -0,678611228 |
| A_32_P16258   | ENST00000272427 | EXOC6B         | exocyst complex component 6B                              | ENST00000272427 | -0,678639345 |
| A_24_P69053   | NM_001080477    | ODZ3           | odz, odd Oz/ten-m homolog 3 (Drosophila)                  | ENST00000406950 | -0,678674737 |
| A_23_P126278  | NM_003465       | CHIT1          | chitinase 1 (chitotriosidase)                             | ENST00000484834 | -0,678716537 |



|                |                  |                |                                                             |                 |              |
|----------------|------------------|----------------|-------------------------------------------------------------|-----------------|--------------|
| A_32_P23624    | NM_012089        | ABCB10         | ATP-binding cassette, sub-family B (MDR/TAP), member 10     | ENST00000344517 | -0,67876917  |
| A_23_P155989   | NM_022145        | CENPK          | centromere protein K                                        | ENST00000242872 | -0,678777658 |
| A_23_P102864   | NM_002772        | TMPRSS15       | transmembrane protease, serine 15                           | ENST00000284885 | -0,678890708 |
| A_33_P3288110  | NM_001005476     | PKP4           | plakophilin 4                                               | ENST00000389756 | -0,678981772 |
| A_33_P3240353  | NM_017767        | SLC39A4        | solute carrier family 39 (zinc transporter), member 4       | ENST00000276833 | -0,679090323 |
| A_33_P3266132  | NM_198174        | GRHL3          | grainyhead-like 3 (Drosophila)                              | ENST00000350501 | -0,679263539 |
| A_23_P56734    | NM_006895        | HNMT           | histamine N-methyltransferase                               | ENST00000485653 | -0,679412875 |
| A_23_P110941   | NM_001512        | GSTA4          | glutathione S-transferase alpha 4                           | ENST00000370960 | -0,679520383 |
| A_23_P107421   | NM_003258        | TK1            | thymidine kinase 1, soluble                                 | ENST00000405273 | -0,679647036 |
| A_33_P3272209  | NM_017694        | MFSD6          | major facilitator superfamily domain containing 6           | ENST00000392328 | -0,679721407 |
| A_32_P30649    | NM_004454        | ETV5           | ets variant 5                                               | ENST00000306376 | -0,680081148 |
| A_23_P106405   | NM_002487        | NDN            | necdin homolog (mouse)                                      | ENST00000331837 | -0,68022204  |
| A_19_P00327406 | TCONS_00014970   | XLOC_007052    |                                                             |                 | -0,680300191 |
| A_23_P118815   | NM_001012271     | BIRC5          | baculoviral IAP repeat containing 5                         | ENST00000301633 | -0,680439291 |
| A_23_P329573   | NM_000211        | ITGB2          | integrin, beta 2 (complement component 3 receptor 3 and     | ENST00000302347 | -0,680675524 |
| A_23_P164773   | NM_002002        | FCER2          | Fc fragment of IgE, low affinity II, receptor for (CD23)    | ENST00000346664 | -0,681003511 |
| A_33_P3412349  | NM_152943        | ZNF268         | zinc finger protein 268                                     | ENST00000228289 | -0,681607253 |
| A_33_P3226080  | NM_207103        | C17orf87       | chromosome 17 open reading frame 87                         | ENST00000399600 | -0,681610109 |
| A_24_P303199   | NM_019087        | ARL15          | ADP-ribosylation factor-like 15                             | ENST00000504924 | -0,681679145 |
| A_21_P0002240  | TCONS_00003732   | XLOC_001527    |                                                             |                 | -0,682074111 |
| A_21_P0013210  | TCONS_l2_0002592 | XLOC_l2_013436 |                                                             |                 | -0,682151729 |
| A_24_P414269   | NM_005787        | ALG3           | asparagine-linked glycosylation 3, alpha-1,3- mannosyltrans | ENST00000397676 | -0,682151758 |
| A_21_P0014155  | XR_108629        | LOC100129461   | uncharacterized LOC100129461                                |                 | -0,682229285 |
| A_24_P398323   | NM_001003827     | TRIM34         | tripartite motif containing 34                              | ENST00000495668 | -0,682516733 |
| A_23_P111361   | NM_173672        | PPIL6          | peptidylprolyl isomerase (cyclophilin)-like 6               | ENST00000521072 | -0,682647202 |
| A_24_P40529    | NM_018196        | TMLHE          | trimethyllysine hydroxylase, epsilon                        | ENST00000334398 | -0,682672574 |
| A_24_P290751   | NM_004416        | DTX1           | deltex homolog 1 (Drosophila)                               | ENST00000547974 | -0,682819881 |
| A_23_P119478   | NM_005755        | EBI3           | Epstein-Barr virus induced 3                                | ENST00000221847 | -0,682849008 |
| A_23_P329573   | NM_000211        | ITGB2          | integrin, beta 2 (complement component 3 receptor 3 and     | ENST00000302347 | -0,683108424 |

|               |                |              |                                                                |                 |              |
|---------------|----------------|--------------|----------------------------------------------------------------|-----------------|--------------|
| A_23_P120883  | NM_002133      | HMOX1        | heme oxygenase (decycling) 1                                   | ENST00000216117 | -0,683111552 |
| A_23_P340848  | NM_000960      | PTGIR        | prostaglandin I2 (prostacyclin) receptor (IP)                  | ENST00000291294 | -0,683191315 |
| A_23_P148194  | NM_018269      | ADI1         | acireductone dioxygenase 1                                     | ENST00000327435 | -0,683429385 |
| A_23_P329573  | NM_000211      | ITGB2        | integrin, beta 2 (complement component 3 receptor 3 and        | ENST00000302347 | -0,683437073 |
| A_23_P430902  | NM_178832      | MORN4        | MORN repeat containing 4                                       | ENST00000335628 | -0,68347269  |
| A_23_P17855   | NM_001039141   | TRIOBP       | TRIO and F-actin binding protein                               | ENST00000344404 | -0,683780187 |
| A_23_P106405  | NM_002487      | NDN          | necdin homolog (mouse)                                         | ENST00000331837 | -0,684009153 |
| A_23_P45059   | NM_001380      | DOCK1        | dedicator of cytokinesis 1                                     | ENST00000280333 | -0,684045001 |
| A_23_P120883  | NM_002133      | HMOX1        | heme oxygenase (decycling) 1                                   | ENST00000216117 | -0,684064838 |
| A_21_P0006150 | TCONS_00016002 | XLOC_007393  |                                                                |                 | -0,68416462  |
| A_23_P48669   | NM_005192      | CDKN3        | cyclin-dependent kinase inhibitor 3                            | ENST00000555837 | -0,68422439  |
| A_24_P299685  | NM_198389      | PDPN         | podoplanin                                                     | ENST00000487038 | -0,684226234 |
| A_21_P0012276 | NM_014252      | SLC25A15     | solute carrier family 25 (mitochondrial carrier; ornithine tra | ENST00000379523 | -0,684246071 |
| A_23_P10385   | NM_016448      | DTL          | denticleless homolog (Drosophila)                              | ENST00000475419 | -0,684331801 |
| A_33_P3258392 | NM_001955      | EDN1         | endothelin 1                                                   | ENST00000379375 | -0,684533526 |
| A_32_P135243  | NM_015440      | MTHFD1L      | methylenetetrahydrofolate dehydrogenase (NADP+ depend          | ENST00000412301 | -0,684567165 |
| A_23_P120883  | NM_002133      | HMOX1        | heme oxygenase (decycling) 1                                   | ENST00000216117 | -0,684686788 |
| A_33_P3286536 | NM_002033      | FUT4         | fucosyltransferase 4 (alpha (1,3) fucosyltransferase, myeloi   | ENST00000358752 | -0,684708648 |
| A_23_P116829  | NM_003348      | UBE2N        | ubiquitin-conjugating enzyme E2N                               | ENST00000318066 | -0,684779387 |
| A_23_P119478  | NM_005755      | EBI3         | Epstein-Barr virus induced 3                                   | ENST00000221847 | -0,684968468 |
| A_23_P120883  | NM_002133      | HMOX1        | heme oxygenase (decycling) 1                                   | ENST00000216117 | -0,685252334 |
| A_23_P104876  | NM_017425      | SPA17        | sperm autoantigenic protein 17                                 | ENST00000524614 | -0,685834754 |
| A_23_P218086  | NM_001143819   | TPCN1        | two pore segment channel 1                                     | ENST00000541517 | -0,685876254 |
| A_33_P3242623 | NM_014331      | SLC7A11      | solute carrier family 7 (anionic amino acid transporter light  | ENST00000280612 | -0,68603669  |
| A_23_P146946  | NM_001323      | CST6         | cystatin E/M                                                   | ENST00000312134 | -0,686083236 |
| A_33_P3341474 | NM_001080412   | ZBTB38       | zinc finger and BTB domain containing 38                       | ENST00000514251 | -0,686120222 |
| A_21_P0006381 | XR_108963      | LOC100506414 | uncharacterized LOC100506414                                   | ENST00000413352 | -0,686132157 |
| A_21_P0000680 | NR_037605      | LOC100506046 | uncharacterized LOC100506046                                   | ENST00000416578 | -0,686132564 |
| A_23_P206359  | NM_004360      | CDH1         | cadherin 1, type 1, E-cadherin (epithelial)                    | ENST00000261769 | -0,686468573 |

|                |                 |              |                                                             |                 |              |
|----------------|-----------------|--------------|-------------------------------------------------------------|-----------------|--------------|
| A_23_P110941   | NM_001512       | GSTA4        | glutathione S-transferase alpha 4                           | ENST00000370960 | -0,686749023 |
| A_23_P85800    | NM_001803       | CD52         | CD52 molecule                                               | ENST00000374213 | -0,68712442  |
| A_21_P0003312  | TCONS_00007354  | XLOC_003400  |                                                             |                 | -0,687187794 |
| A_24_P417162   | NM_005647       | TBL1X        | transducin (beta)-like 1X-linked                            | ENST00000217964 | -0,687355634 |
| A_23_P121533   | NM_012445       | SPON2        | spondin 2, extracellular matrix protein                     | ENST00000431380 | -0,687385692 |
| A_24_P942112   | AK001678        | POLR1B       | polymerase (RNA) I polypeptide B, 128kDa                    |                 | -0,687537289 |
| A_24_P314786   | NM_022058       | SLC4A10      | solute carrier family 4, sodium bicarbonate transporter, me | ENST00000415711 | -0,687543627 |
| A_23_P119778   | NM_020342       | SLC39A10     | solute carrier family 39 (zinc transporter), member 10      | ENST00000409086 | -0,687634903 |
| A_23_P99785    | NM_024643       | FAM164C      | family with sequence similarity 164, member C               | ENST00000439583 | -0,687636156 |
| A_23_P113748   | NM_024697       | ZNF385D      | zinc finger protein 385D                                    | ENST00000494118 | -0,687727203 |
| A_33_P3400903  | NR_002227       | DISC2        | disrupted in schizopfhrenia 2 (non-protein coding)          |                 | -0,687892449 |
| A_21_P0000893  | NR_040051       | LOC100506686 | uncharacterized LOC100506686                                |                 | -0,687973175 |
| A_23_P118      | NM_001439       | EXTL2        | exostoses (multiple)-like 2                                 | ENST00000370114 | -0,688080392 |
| A_32_P138042   | XR_132684       | LOC100652805 | uncharacterized LOC100652805                                |                 | -0,688086537 |
| A_33_P3284951  | NM_006739       | MCM5         | minichromosome maintenance complex component 5              | ENST00000455261 | -0,688145375 |
| A_23_P120467   | NM_199427       | ZFP64        | zinc finger protein 64 homolog (mouse)                      | ENST00000361387 | -0,688379406 |
| A_23_P202071   | NM_001025077    | CELF2        | CUGBP, Elav-like family member 2                            | ENST00000354440 | -0,688553135 |
| A_24_P109633   | NM_001142594    | ITPK1        | inositol-tetrakisphosphate 1-kinase                         | ENST00000354313 | -0,688741694 |
| A_23_P140725   | NM_014714       | IFT140       | intraflagellar transport 140 homolog (Chlamydomonas)        | ENST00000426508 | -0,689119485 |
| A_33_P3318966  | NM_173802       | METTL20      | methyltransferase like 20                                   | ENST00000395763 | -0,689171836 |
| A_21_P0004854  | TCONS_00011736  | XLOC_005202  |                                                             |                 | -0,689610271 |
| A_19_P00316675 | NR_033359       | MEG3         |                                                             |                 | -0,689660063 |
| A_21_P0006705  | ENST00000428766 | XLOC_008619  |                                                             | ENST00000428766 | -0,689746306 |
| A_23_P329573   | NM_000211       | ITGB2        | integrin, beta 2 (complement component 3 receptor 3 and     | ENST00000302347 | -0,689762656 |
| A_23_P38795    | NM_002029       | FPR1         | formyl peptide receptor 1                                   | ENST00000304748 | -0,689884085 |
| A_23_P101434   | NM_033297       | NLRP12       | NLR family, pyrin domain containing 12                      | ENST00000391773 | -0,689919962 |
| A_23_P80032    | NM_005225       | E2F1         | E2F transcription factor 1                                  | ENST00000343380 | -0,690151159 |
| A_23_P88331    | NM_014750       | DLGAP5       | discs, large (Drosophila) homolog-associated protein 5      | ENST00000247191 | -0,690192778 |
| A_23_P103310   | NM_002963       | S100A7       | S100 calcium binding protein A7                             | ENST00000368723 | -0,690277748 |

|               |                 |                |                                                         |                 |              |
|---------------|-----------------|----------------|---------------------------------------------------------|-----------------|--------------|
| A_23_P215070  | NM_018718       | CEP41          | centrosomal protein 41kDa                               | ENST00000223208 | -0,690280129 |
| A_23_P367816  | NM_032167       | SNX29          | sorting nexin 29                                        | ENST00000306030 | -0,690301349 |
| A_33_P3243683 | NM_005219       | DIAPH1         | diaphanous homolog 1 (Drosophila)                       | ENST00000389057 | -0,690411604 |
| A_21_P0014938 | XR_133412       | LOC100505813   | uncharacterized LOC100505813                            |                 | -0,690634199 |
| A_23_P396666  | NM_015079       | TBC1D2B        | TBC1 domain family, member 2B                           | ENST00000300584 | -0,690770841 |
| A_23_P74609   | NM_015714       | G0S2           | G0/G1switch 2                                           | ENST00000367029 | -0,690867539 |
| A_23_P105562  | NM_000552       | VWF            | von Willebrand factor                                   | ENST00000261405 | -0,691066327 |
| A_23_P143987  | NM_006395       | ATG7           | ATG7 autophagy related 7 homolog (S. cerevisiae)        | ENST00000466605 | -0,691080558 |
| A_23_P413862  | NM_020869       | DCDC5          | doublecortin domain containing 5                        | ENST00000303697 | -0,691153297 |
| A_23_P68851   | NM_001039570    | KREMEN1        | kringle containing transmembrane protein 1              | ENST00000400338 | -0,691172658 |
| A_23_P82047   | NM_001127715    | STXBP5         | syntaxin binding protein 5 (tomosyn)                    | ENST00000367479 | -0,691261772 |
| A_33_P3224803 | NM_000265       | NCF1           | neutrophil cytosolic factor 1                           | ENST00000438106 | -0,691328992 |
| A_21_P0001766 | NR_033831       | UNQ6975        | putative uncharacterized protein UNQ6975/PRO21958       | ENST00000378479 | -0,691450137 |
| A_21_P0003549 | NR_039975       | LOC100506229   | uncharacterized LOC100506229                            | ENST00000515864 | -0,69169507  |
| A_23_P99360   | NM_213590       | TRIM13         | tripartite motif containing 13                          | ENST00000378182 | -0,692014201 |
| A_23_P80032   | NM_005225       | E2F1           | E2F transcription factor 1                              | ENST00000343380 | -0,692402536 |
| A_23_P329870  | NM_024599       | RHBDF2         | rhomboid 5 homolog 2 (Drosophila)                       | ENST00000313080 | -0,692483803 |
| A_23_P104876  | NM_017425       | SPA17          | sperm autoantigenic protein 17                          | ENST00000524614 | -0,69251363  |
| A_33_P3297155 | NM_003616       | GEMIN2         | gem (nuclear organelle) associated protein 2            | ENST00000525153 | -0,692537198 |
| A_23_P329573  | NM_000211       | ITGB2          | integrin, beta 2 (complement component 3 receptor 3 and | ENST00000302347 | -0,692545007 |
| A_23_P119478  | NM_005755       | EBI3           | Epstein-Barr virus induced 3                            | ENST00000221847 | -0,692564398 |
| A_33_P3322999 | NM_001164375    | C10orf105      | chromosome 10 open reading frame 105                    | ENST00000398786 | -0,692574825 |
| A_23_P216766  | NM_030940       | ISCA1          | iron-sulfur cluster assembly 1 homolog (S. cerevisiae)  | ENST00000375991 | -0,692582746 |
| A_33_P3399718 | XM_001716411    | LOC128322      | nuclear transport factor 2-like                         |                 | -0,692688468 |
| A_24_P323148  | NM_182573       | LYPD5          | LY6/PLAUR domain containing 5                           | ENST00000377950 | -0,693053882 |
| A_21_P0010635 | ENST00000418366 | XLOC_I2_001011 |                                                         | ENST00000418366 | -0,693064115 |
| A_21_P0000958 | ENST00000412797 | XLOC_000101    |                                                         | ENST00000412797 | -0,693083573 |
| A_33_P3264846 | NM_152703       | SAMD9L         | sterile alpha motif domain containing 9-like            | ENST00000394472 | -0,693436519 |
| A_23_P147397  | NM_001080463    | DYNC2H1        | dynein, cytoplasmic 2, heavy chain 1                    | ENST00000398093 | -0,693541042 |

|                |                 |                |                                                                                          |                 |              |
|----------------|-----------------|----------------|------------------------------------------------------------------------------------------|-----------------|--------------|
| A_32_P169131   | NM_019109       | ALG1           | asparagine-linked glycosylation 1, beta-1,4-mannosyltransferase homolog ( <i>S. cere</i> |                 | -0,693620228 |
| A_23_P23048    | NM_002965       | S100A9         | S100 calcium binding protein A9                                                          | ENST00000368738 | -0,693709652 |
| A_23_P128351   | NM_032680       | EFCAB4B        | EF-hand calcium binding domain 4B                                                        | ENST00000444507 | -0,693746968 |
| A_24_P217904   | NM_033502       | TRERF1         | transcriptional regulating factor 1                                                      | ENST00000372922 | -0,693763013 |
| A_23_P90732    | NM_001077399    | PNKD           | paroxysmal nonkinesigenic dyskinesia                                                     | ENST00000469689 | -0,694070868 |
| A_21_P0011983  | ENST00000432711 | XLOC_I2_008396 |                                                                                          | ENST00000432711 | -0,69438209  |
| A_23_P120883   | NM_002133       | HMOX1          | heme oxygenase (decycling) 1                                                             | ENST00000216117 | -0,694440647 |
| A_33_P3333272  | NM_001204210    | TMEM235        | transmembrane protein 235                                                                | ENST00000374946 | -0,694580044 |
| A_33_P3260373  | NM_001204890    | ISY1-RAB43     | ISY1-RAB43 readthrough                                                                   | ENST00000315150 | -0,694856669 |
| A_23_P112452   | NR_003191       | GGTA1P         | glycoprotein, alpha-galactosyltransferase 1 pseudogene                                   | ENST00000373793 | -0,695001011 |
| A_19_P00320343 | ENST00000523946 | XLOC_007052    | 0                                                                                        | ENST00000523946 | -0,695113277 |
| A_23_P105562   | NM_000552       | VWF            | von Willebrand factor                                                                    | ENST00000261405 | -0,695191235 |
| A_24_P319113   | NM_002562       | P2RX7          | purinergic receptor P2X, ligand-gated ion channel, 7                                     | ENST00000377162 | -0,69528924  |
| A_23_P105562   | NM_000552       | VWF            | von Willebrand factor                                                                    | ENST00000261405 | -0,695294001 |
| A_33_P3359856  | ENST00000445782 | MZT2A          | mitotic spindle organizing protein 2A                                                    | ENST00000445782 | -0,695418442 |
| A_21_P0009949  | XR_109653       | LOC100505664   | uncharacterized LOC100505664                                                             | ENST00000411595 | -0,695516479 |
| A_23_P80032    | NM_005225       | E2F1           | E2F transcription factor 1                                                               | ENST00000343380 | -0,695529034 |
| A_23_P118246   | NM_016095       | GINS2          | GINS complex subunit 2 (Psf2 homolog)                                                    | ENST00000253462 | -0,695702163 |
| A_23_P74112    | NM_170743       | IL28RA         | interleukin 28 receptor, alpha (interferon, lambda receptor)                             | ENST00000327535 | -0,695760703 |
| A_21_P0006504  | THC2642571      | XLOC_008005    |                                                                                          |                 | -0,695775274 |
| A_23_P80032    | NM_005225       | E2F1           | E2F transcription factor 1                                                               | ENST00000343380 | -0,696093101 |
| A_21_P0002334  | THC2686815      | XLOC_001788    |                                                                                          |                 | -0,696140709 |
| A_24_P295010   | NM_004155       | SERPINB9       | serpin peptidase inhibitor, clade B (ovalbumin), member 9                                | ENST00000380698 | -0,696213977 |
| A_23_P6381     | NM_002430       | MN1            | meningioma (disrupted in balanced translocation) 1                                       | ENST00000302326 | -0,696270557 |
| A_33_P3252834  | NM_012396       | PHLDA3         | pleckstrin homology-like domain, family A, member 3                                      | ENST00000367309 | -0,696331553 |
| A_23_P61778    | NM_022463       | NXN            | nucleoredoxin                                                                            | ENST00000336868 | -0,696363502 |
| A_21_P0011091  | THC2563806      | XLOC_I2_003293 |                                                                                          |                 | -0,696447871 |
| A_33_P3349145  | NM_012263       | TTL1           | tubulin tyrosine ligase-like family, member 1                                            | ENST00000331018 | -0,696791337 |
| A_21_P0001233  | ENST00000433058 | XLOC_001230    |                                                                                          | ENST00000433058 | -0,697161841 |



|                |                 |                |                                                                |                 |              |
|----------------|-----------------|----------------|----------------------------------------------------------------|-----------------|--------------|
| A_23_P99906    | NM_199330       | HOMER2         | homer homolog 2 (Drosophila)                                   | ENST00000304231 | -0,697164943 |
| A_33_P3383236  | NM_198559       | C2orf62        | chromosome 2 open reading frame 62                             | ENST00000494447 | -0,697194781 |
| A_23_P166459   | NM_002305       | LGALS1         | lectin, galactoside-binding, soluble, 1                        | ENST00000425542 | -0,697267257 |
| A_23_P121533   | NM_012445       | SPON2          | spondin 2, extracellular matrix protein                        | ENST00000431380 | -0,697308504 |
| A_24_P95439    | NM_001014437    | CARS           | cysteinyl-tRNA synthetase                                      | ENST00000397114 | -0,697350048 |
| A_23_P117387   | NM_054024       | MIA2           | melanoma inhibitory activity 2                                 | ENST00000556784 | -0,697482297 |
| A_23_P120883   | NM_002133       | HMOX1          | heme oxygenase (decycling) 1                                   | ENST00000216117 | -0,697502408 |
| A_33_P3262694  | XR_132608       | LOC647086      | chromosome 20 open reading frame 27 pseudogene                 |                 | -0,697772968 |
| A_24_P10233    | NM_014326       | DAPK2          | death-associated protein kinase 2                              | ENST00000457488 | -0,697834402 |
| A_23_P104972   | NM_023945       | MS4A5          | membrane-spanning 4-domains, subfamily A, member 5             | ENST00000300190 | -0,698059179 |
| A_23_P118834   | NM_001067       | TOP2A          | topoisomerase (DNA) II alpha 170kDa                            | ENST00000269577 | -0,698095004 |
| A_23_P34093    | NM_000402       | G6PD           | glucose-6-phosphate dehydrogenase                              | ENST00000369620 | -0,698262272 |
| A_23_P216894   | NM_001006617    | MAPKAP1        | mitogen-activated protein kinase associated protein 1          | ENST00000373505 | -0,698300885 |
| A_23_P145895   | NR_015381       | TP53TG1        | TP53 target 1 (non-protein coding)                             |                 | -0,698410187 |
| A_24_P944827   | NM_006395       | ATG7           | ATG7 autophagy related 7 homolog (S. cerevisiae)               | ENST00000354449 | -0,698451154 |
| A_23_P37391    | NM_001144995    | CCDC85C        | coiled-coil domain containing 85C                              | ENST00000380243 | -0,698555381 |
| A_32_P47754    | ENST00000431042 | SLC2A14        | solute carrier family 2 (facilitated glucose transporter), men | ENST00000431042 | -0,699181215 |
| A_33_P3301514  | NM_001193582    | NRCAM          | neuronal cell adhesion molecule                                | ENST00000379022 | -0,699555026 |
| A_24_P362193   | NM_003874       | CD84           | CD84 molecule                                                  | ENST00000368047 | -0,699573875 |
| A_21_P0012729  | THC2524841      | XLOC_I2_010723 |                                                                |                 | -0,699679078 |
| A_23_P110941   | NM_001512       | GSTA4          | glutathione S-transferase alpha 4                              | ENST00000370960 | -0,699700686 |
| A_21_P0000547  | NR_027767       | TNIK           | TRAF2 and NCK interacting kinase                               | ENST00000465393 | -0,699899677 |
| A_23_P304716   | NM_019089       | HES2           | hairy and enhancer of split 2 (Drosophila)                     | ENST00000377834 | -0,700446692 |
| A_19_P00321317 | THC2509656      | Q39472         |                                                                |                 | -0,700481687 |
| A_23_P11201    | NM_001097579    | GPR34          | G protein-coupled receptor 34                                  | ENST00000535368 | -0,700832795 |
| A_23_P52031    | NM_002633       | PGM1           | phosphoglucomutase 1                                           | ENST00000538673 | -0,700867687 |
| A_33_P3268224  | NM_145207       | SPATA5         | spermatogenesis associated 5                                   |                 | -0,70103353  |
| A_24_P390668   | NM_005892       | FMNL1          | formin-like 1                                                  | ENST00000539884 | -0,701200404 |
| A_24_P170726   | AK094407        | LOC645427      | uncharacterized LOC645427                                      |                 | -0,701262629 |

|                |              |              |                                                          |                 |              |
|----------------|--------------|--------------|----------------------------------------------------------|-----------------|--------------|
| A_23_P26810    | NM_000546    | TP53         | tumor protein p53                                        | ENST00000396473 | -0,701304386 |
| A_19_P00322426 | NR_015364    | LOC441204    | uncharacterized LOC441204                                |                 | -0,701431963 |
| A_23_P10647    | NM_018659    | CYTL1        | cytokine-like 1                                          | ENST00000307746 | -0,701455036 |
| A_23_P162355   | NM_018953    | HOXC5        | homeobox C5                                              | ENST00000312492 | -0,701550366 |
| A_24_P334718   | NM_181791    | GPR141       | G protein-coupled receptor 141                           | ENST00000334425 | -0,701604148 |
| A_23_P55319    | NM_004475    | FLOT2        | flotillin 2                                              | ENST00000394906 | -0,701758133 |
| A_23_P29680    | NM_024046    | CAMKV        | CaM kinase-like vesicle-associated                       | ENST00000477224 | -0,701759455 |
| A_24_P14974    | NM_182537    | HTR3D        | 5-hydroxytryptamine (serotonin) receptor 3 family member | ENST00000428798 | -0,701818814 |
| A_23_P105562   | NM_000552    | VWF          | von Willebrand factor                                    | ENST00000261405 | -0,702087883 |
| A_24_P68783    | NM_012275    | IL36RN       | interleukin 36 receptor antagonist                       | ENST00000393200 | -0,702171687 |
| A_33_P3589420  | BC070394     | LOC387810    | uncharacterized LOC387810                                | ENST00000525984 | -0,702406797 |
| A_23_P352266   | NM_000633    | BCL2         | B-cell CLL/lymphoma 2                                    | ENST00000398117 | -0,702528228 |
| A_33_P3423949  | NM_005189    | CBX2         | chromobox homolog 2                                      | ENST00000310942 | -0,702672459 |
| A_23_P12082    | NM_001025199 | CHI3L2       | chitinase 3-like 2                                       | ENST00000369748 | -0,702810527 |
| A_24_P382187   | NM_001552    | IGFBP4       | insulin-like growth factor binding protein 4             | ENST00000269593 | -0,702841614 |
| A_21_P0007658  | THC2663796   | XLOC_009937  |                                                          |                 | -0,702939504 |
| A_23_P307968   | NM_052836    | CDH23        | cadherin-related 23                                      | ENST00000398842 | -0,703129439 |
| A_33_P3222653  | NR_033938    | LOC100131366 | uncharacterized LOC100131366                             |                 | -0,703306935 |
| A_23_P105562   | NM_000552    | VWF          | von Willebrand factor                                    | ENST00000261405 | -0,703418086 |
| A_23_P421306   | NM_177963    | SYT12        | synaptotagmin XII                                        | ENST00000393946 | -0,703516512 |
| A_23_P145984   | NM_012338    | TSPAN12      | tetraspanin 12                                           | ENST00000222747 | -0,703529745 |
| A_23_P6263     | NM_002463    | MX2          | myxovirus (influenza virus) resistance 2 (mouse)         | ENST00000330714 | -0,703690183 |
| A_23_P1014     | NR_026761    | LINC00467    | long intergenic non-protein coding RNA 467               |                 | -0,703725077 |
| A_33_P3416574  | NM_016108    | AIG1         | androgen-induced 1                                       | ENST00000367601 | -0,703791274 |
| A_24_P114255   | NM_138799    | MBOAT2       | membrane bound O-acyltransferase domain containing 2     | ENST00000305997 | -0,703824678 |
| A_23_P61280    | NM_012133    | COPG2        | coatamer protein complex, subunit gamma 2                | ENST00000425248 | -0,703867983 |
| A_23_P503182   | NM_021962    | ABR          | active BCR-related gene                                  | ENST00000291107 | -0,704094813 |
| A_23_P119562   | NM_001928    | CFD          | complement factor D (adipsin)                            | ENST00000327726 | -0,704162641 |
| A_33_P3236177  | NM_001145    | ANG          | angiogenin, ribonuclease, RNase A family, 5              | ENST00000336811 | -0,704330154 |

|                |                  |                |                                                                                     |                 |              |
|----------------|------------------|----------------|-------------------------------------------------------------------------------------|-----------------|--------------|
| A_23_P120883   | NM_002133        | HMOX1          | heme oxygenase (decycling) 1                                                        | ENST00000216117 | -0,704388762 |
| A_33_P3404014  | NM_001013646     | C20orf107      | chromosome 20 open reading frame 107                                                | ENST00000371325 | -0,704552175 |
| A_33_P3253687  | NR_003945        | GVINP1         | GTPase, very large interferon inducible pseudogene 1                                |                 | -0,70460105  |
| A_33_P3219279  | NM_032452        | JPH4           | junctophilin 4                                                                      | ENST00000543864 | -0,704759117 |
| A_23_P120883   | NM_002133        | HMOX1          | heme oxygenase (decycling) 1                                                        | ENST00000216117 | -0,704819774 |
| A_33_P3275350  | NM_014286        | NCS1           | neuronal calcium sensor 1                                                           | ENST00000372398 | -0,704886866 |
| A_33_P3283780  | NM_015898        | ZBTB7A         | zinc finger and BTB domain containing 7A                                            | ENST00000322357 | -0,704944089 |
| A_23_P34835    | NM_005572        | LMNA           | lamin A/C                                                                           | ENST00000368301 | -0,705050559 |
| A_23_P314145   | NM_005715        | UST            | uronyl-2-sulfotransferase                                                           | ENST00000367463 | -0,705212872 |
| A_19_P00319981 | ENST00000436710  | LOC100506119   |                                                                                     | ENST00000436710 | -0,705302743 |
| A_33_P3290780  | NM_001185156     | IL24           | interleukin 24                                                                      | ENST00000491169 | -0,705333902 |
| A_24_P158089   | NM_000602        | SERPINE1       | serpin peptidase inhibitor, clade E (nexin, plasminogen activator inhibitor type 1) | ENST00000445463 | -0,705958177 |
| A_23_P121533   | NM_012445        | SPON2          | spondin 2, extracellular matrix protein                                             | ENST00000431380 | -0,706020111 |
| A_21_P0013134  | ENST00000435946  | XLOC_I2_012605 |                                                                                     | ENST00000435946 | -0,706148453 |
| A_23_P160154   | NM_000403        | GALE           | UDP-galactose-4-epimerase                                                           | ENST00000418277 | -0,706235275 |
| A_33_P3361422  | NM_000784        | CYP27A1        | cytochrome P450, family 27, subfamily A, polypeptide 1                              | ENST00000494263 | -0,706352278 |
| A_23_P83751    | NM_024806        | C11orf63       | chromosome 11 open reading frame 63                                                 | ENST00000227349 | -0,706542587 |
| A_23_P155857   | NM_198041        | NUDT6          | nudix (nucleoside diphosphate linked moiety X)-type motif 6                         | ENST00000502270 | -0,706836781 |
| A_21_P0012671  | TCONS_I2_0002119 | XLOC_I2_011173 |                                                                                     |                 | -0,706915232 |
| A_33_P3338928  | NM_001343        | DAB2           | disabled homolog 2, mitogen-responsive phosphoprotein (1)                           | ENST00000320816 | -0,707110595 |
| A_33_P3254380  | NR_033801        | SLC9A7P1       | solute carrier family 9 (sodium/hydrogen exchanger), member 7                       | ENST00000328306 | -0,707369353 |
| A_23_P344194   | NM_001013635     | C12orf68       | chromosome 12 open reading frame 68                                                 | ENST00000316554 | -0,707449984 |
| A_23_P382045   | NM_020245        | TULP4          | tubby like protein 4                                                                | ENST00000367097 | -0,707472377 |
| A_23_P77590    | NM_018052        | VAC14          | Vac14 homolog ( <i>S. cerevisiae</i> )                                              | ENST00000536184 | -0,707498812 |
| A_23_P434809   | NM_002964        | S100A8         | S100 calcium binding protein A8                                                     | ENST00000368733 | -0,707548786 |
| A_23_P77918    | NM_006041        | HS3ST3B1       | heparan sulfate (glucosamine) 3-O-sulfotransferase 3B1                              | ENST00000360954 | -0,707559746 |
| A_23_P214821   | NM_001955        | EDN1           | endothelin 1                                                                        | ENST00000379375 | -0,707607157 |
| A_24_P372625   | NM_016422        | RNF141         | ring finger protein 141                                                             | ENST00000534281 | -0,707752356 |
| A_23_P205778   | NM_016194        | GNB5           | guanine nucleotide binding protein (G protein), beta 5                              | ENST00000358784 | -0,70786001  |

|                |                  |                |                                                         |                 |              |
|----------------|------------------|----------------|---------------------------------------------------------|-----------------|--------------|
| A_24_P386622   | NM_004041        | ARRB1          | arrestin, beta 1                                        | ENST00000360025 | -0,707970442 |
| A_23_P214821   | NM_001955        | EDN1           | endothelin 1                                            | ENST00000379375 | -0,707985863 |
| A_33_P3343045  | ENST00000393235  | CALHM2         | calcium homeostasis modulator 2                         | ENST00000393235 | -0,708095958 |
| A_21_P0002741  | BC039681         | XLOC_002652    |                                                         |                 | -0,708137876 |
| A_33_P3304668  | NM_000088        | COL1A1         | collagen, type I, alpha 1                               | ENST00000225964 | -0,708275588 |
| A_23_P119778   | NM_020342        | SLC39A10       | solute carrier family 39 (zinc transporter), member 10  | ENST00000409086 | -0,70827614  |
| A_33_P3339961  | NM_178547        | ZBTB80S        | zinc finger and BTB domain containing 8 opposite strand | ENST00000373506 | -0,708282415 |
| A_23_P124190   | NM_130390        | TRIM34         | tripartite motif containing 34                          | ENST00000491385 | -0,708374535 |
| A_23_P211039   | NM_006988        | ADAMTS1        | ADAM metalloproteinase with thrombospondin type 1 motif | ENST00000464589 | -0,70840294  |
| A_23_P152462   | NM_052874        | STX1B          | syntaxin 1B                                             | ENST00000215095 | -0,708817686 |
| A_24_P402588   | NM_018014        | BCL11A         | B-cell CLL/lymphoma 11A (zinc finger protein)           | ENST00000489516 | -0,708901538 |
| A_33_P3372466  | NM_138501        | TECR           | trans-2,3-enoyl-CoA reductase                           | ENST00000444365 | -0,709002345 |
| A_23_P154806   | NM_012156        | EPB41L1        | erythrocyte membrane protein band 4.1-like 1            | ENST00000373951 | -0,709039441 |
| A_23_P121533   | NM_012445        | SPON2          | spondin 2, extracellular matrix protein                 | ENST00000431380 | -0,709098448 |
| A_23_P117852   | NM_014736        | KIAA0101       | KIAA0101                                                | ENST00000380258 | -0,709181712 |
| A_23_P121533   | NM_012445        | SPON2          | spondin 2, extracellular matrix protein                 | ENST00000431380 | -0,709309334 |
| A_23_P412562   | NM_174896        | C1orf162       | chromosome 1 open reading frame 162                     | ENST00000369718 | -0,709666633 |
| A_24_P316257   | NM_176677        | NHLRC4         | NHL repeat containing 4                                 | ENST00000424439 | -0,709782693 |
| A_23_P214821   | NM_001955        | EDN1           | endothelin 1                                            | ENST00000379375 | -0,709831711 |
| A_23_P113613   | NM_022842        | CDCP1          | CUB domain containing protein 1                         | ENST00000296129 | -0,709987382 |
| A_21_P0011968  | TCONS_I2_0001490 | XLOC_I2_008270 |                                                         |                 | -0,710134396 |
| A_23_P53198    | NM_032564        | DGAT2          | diacylglycerol O-acyltransferase 2                      | ENST00000532657 | -0,710156611 |
| A_23_P121533   | NM_012445        | SPON2          | spondin 2, extracellular matrix protein                 | ENST00000431380 | -0,710537204 |
| A_33_P3390042  | NR_015409        | LOC143188      | uncharacterized LOC143188                               |                 | -0,710710889 |
| A_21_P0008584  | TCONS_00023300   | XLOC_011169    |                                                         |                 | -0,710912212 |
| A_19_P00322118 | NR_037875        | LOC728730      | uncharacterized LOC728730                               | ENST00000422128 | -0,710948971 |
| A_32_P170003   | NM_015650        | TRAF3IP1       | TNF receptor-associated factor 3 interacting protein 1  | ENST00000391993 | -0,711190297 |
| A_23_P10647    | NM_018659        | CYTL1          | cytokine-like 1                                         | ENST00000307746 | -0,711258065 |
| A_23_P116765   | NM_002289        | LALBA          | lactalbumin, alpha-                                     | ENST00000301046 | -0,711430224 |

|                |                 |                |                                                                 |                 |              |
|----------------|-----------------|----------------|-----------------------------------------------------------------|-----------------|--------------|
| A_23_P145874   | NM_152703       | SAMD9L         | sterile alpha motif domain containing 9-like                    | ENST00000411955 | -0,71159987  |
| A_24_P497318   | AF007131        | LOC100129973   | uncharacterized LOC100129973                                    |                 | -0,711632696 |
| A_23_P11201    | NM_001097579    | GPR34          | G protein-coupled receptor 34                                   | ENST00000535368 | -0,711638146 |
| A_23_P34788    | NM_006845       | KIF2C          | kinesin family member 2C                                        | ENST00000372218 | -0,711653626 |
| A_21_P0006498  | THC2714876      | XLOC_007992    |                                                                 |                 | -0,711900525 |
| A_23_P113613   | NM_022842       | CDCP1          | CUB domain containing protein 1                                 | ENST00000296129 | -0,711953122 |
| A_33_P3332396  | NM_024587       | TMEM53         | transmembrane protein 53                                        | ENST00000372243 | -0,711954198 |
| A_23_P120883   | NM_002133       | HMOX1          | heme oxygenase (decycling) 1                                    | ENST00000216117 | -0,712142462 |
| A_33_P3304372  | NM_018342       | TMEM144        | transmembrane protein 144                                       | ENST00000511532 | -0,712296913 |
| A_24_P204244   | NR_001562       | ANXA2P1        | annexin A2 pseudogene 1                                         |                 | -0,712326789 |
| A_23_P36397    | NM_000785       | CYP27B1        | cytochrome P450, family 27, subfamily B, polypeptide 1          | ENST00000228606 | -0,712573889 |
| A_23_P45871    | NM_006820       | IFI44L         | interferon-induced protein 44-like                              | ENST00000476521 | -0,712710708 |
| A_23_P98763    | NM_145309       | LRTOMT         | leucine rich transmembrane and O-methyltransferase domain       | ENST00000538413 | -0,713317178 |
| A_33_P3377364  | NM_000213       | ITGB4          | integrin, beta 4                                                | ENST00000200181 | -0,71357185  |
| A_33_P3342081  | NM_001198       | PRDM1          | PR domain containing 1, with ZNF domain                         | ENST00000369096 | -0,713670874 |
| A_23_P117852   | NM_014736       | KIAA0101       | KIAA0101                                                        | ENST00000380258 | -0,713873891 |
| A_33_P3219384  | NR_024385       | LOC151300      | uncharacterized LOC151300                                       |                 | -0,713914778 |
| A_23_P70213    | NM_000038       | APC            | adenomatous polyposis coli                                      | ENST00000508376 | -0,714012527 |
| A_19_P00322184 | ENST00000436710 | LOC100506119   |                                                                 | ENST00000436710 | -0,714134087 |
| A_21_P0011205  | ENST00000444795 | XLOC_I2_003840 |                                                                 | ENST00000444795 | -0,714361644 |
| A_23_P120883   | NM_002133       | HMOX1          | heme oxygenase (decycling) 1                                    | ENST00000216117 | -0,714430257 |
| A_24_P915692   | NM_007350       | PHLDA1         | pleckstrin homology-like domain, family A, member 1             | ENST00000266671 | -0,714491893 |
| A_23_P316974   | NM_003898       | SYNJ2          | synaptojanin 2                                                  | ENST00000367122 | -0,714639335 |
| A_33_P3326387  | NM_173463       | CCDC149        | coiled-coil domain containing 149                               | ENST00000382116 | -0,714687313 |
| A_21_P0003322  | ENST00000509964 | XLOC_003897    |                                                                 | ENST00000509964 | -0,71501219  |
| A_23_P49060    | NM_181642       | SPINT1         | serine peptidase inhibitor, Kunitz type 1                       | ENST00000431806 | -0,715023394 |
| A_23_P357794   | NM_022045       | MTBP           | Mdm2, transformed 3T3 cell double minute 2, p53 binding protein | ENST00000305949 | -0,715127917 |
| A_23_P38468    | NM_014604       | TAX1BP3        | Tax1 (human T-cell leukemia virus type I) binding protein 3     | ENST00000550383 | -0,71513291  |
| A_23_P118      | NM_001439       | EXTL2          | exostoses (multiple)-like 2                                     | ENST00000370114 | -0,715261622 |



|                |                  |                |                                                               |                 |              |
|----------------|------------------|----------------|---------------------------------------------------------------|-----------------|--------------|
| A_23_P121533   | NM_012445        | SPON2          | spondin 2, extracellular matrix protein                       | ENST00000431380 | -0,715438231 |
| A_21_P0005762  | TCONS_00014852   | XLOC_006918    |                                                               |                 | -0,715590402 |
| A_24_P158089   | NM_000602        | SERPINE1       | serpin peptidase inhibitor, clade E (nexin, plasminogen activ | ENST00000445463 | -0,715611425 |
| A_19_P00318495 | NR_026761        | LINC00467      | long intergenic non-protein coding RNA 467                    |                 | -0,715612535 |
| A_33_P3392525  | NM_001661        | ARL4D          | ADP-ribosylation factor-like 4D                               | ENST00000320033 | -0,715679032 |
| A_23_P348524   | NM_001007125     | C20orf201      | chromosome 20 open reading frame 201                          | ENST00000308906 | -0,715681365 |
| A_23_P121564   | NM_000857        | GUCY1B3        | guanylate cyclase 1, soluble, beta 3                          | ENST00000264424 | -0,715689309 |
| A_33_P3350508  | NM_001080432     | FTO            | fat mass and obesity associated                               | ENST00000460382 | -0,715917763 |
| A_24_P171268   | NM_182663        | RASSF5         | Ras association (RalGDS/AF-6) domain family member 5          | ENST00000304534 | -0,715979838 |
| A_23_P56249    | NM_001281        | TBCB           | tubulin folding cofactor B                                    | ENST00000221855 | -0,716049259 |
| A_23_P103617   | NM_003568        | ANXA9          | annexin A9                                                    | ENST00000368947 | -0,716105532 |
| A_21_P0012484  | TCONS_I2_0001971 | XLOC_I2_010511 |                                                               |                 | -0,71616144  |
| A_21_P0007456  | ENST00000526612  | XLOC_009349    |                                                               | ENST00000526612 | -0,716365742 |
| A_21_P0004108  | ENST00000512978  | XLOC_004747    |                                                               | ENST00000512978 | -0,716412352 |
| A_33_P3209476  | NM_031443        | CCM2           | cerebral cavernous malformation 2                             | ENST00000541586 | -0,716479363 |
| A_32_P75284    | NM_032116        | KATNAL1        | katanin p60 subunit A-like 1                                  | ENST00000380615 | -0,716518893 |
| A_19_P00805954 | TCONS_00011660   | XLOC_005143    |                                                               |                 | -0,716665416 |
| A_33_P3382924  | NM_003118        | SPARC          | secreted protein, acidic, cysteine-rich (osteonectin)         | ENST00000231061 | -0,716685501 |
| A_24_P82630    | NM_015295        | SMCHD1         | structural maintenance of chromosomes flexible hinge dom      | ENST00000320876 | -0,716862544 |
| A_21_P0013306  | NM_007270        | FKBP9          | FK506 binding protein 9, 63 kDa                               | ENST00000472007 | -0,717254675 |
| A_33_P3228305  | NM_015071        | ARHGAP26       | Rho GTPase activating protein 26                              | ENST00000378004 | -0,717348316 |
| A_33_P3212232  | NM_001039396     | MPEG1          | macrophage expressed 1                                        | ENST00000361050 | -0,717421961 |
| A_32_P149298   | NM_001129993     | KIAA1841       | KIAA1841                                                      | ENST00000453873 | -0,717439636 |
| A_33_P3390793  | NM_001017397     | TRIM36         | tripartite motif containing 36                                | ENST00000379618 | -0,71745008  |
| A_24_P372217   | NM_007175        | ERLIN2         | ER lipid raft associated 2                                    | ENST00000276461 | -0,717518176 |
| A_33_P3289621  | AK090602         | LOC283143      | uncharacterized LOC283143                                     |                 | -0,717596613 |
| A_24_P941759   | NM_017769        | G2E3           | G2/M-phase specific E3 ubiquitin protein ligase               | ENST00000206595 | -0,717777465 |
| A_23_P21976    | NM_001897        | CSPG4          | chondroitin sulfate proteoglycan 4                            | ENST00000308508 | -0,717808699 |
| A_23_P105562   | NM_000552        | VWF            | von Willebrand factor                                         | ENST00000261405 | -0,717997134 |

|                |                                  |              |                                                                 |                 |              |
|----------------|----------------------------------|--------------|-----------------------------------------------------------------|-----------------|--------------|
| A_23_P200030   | NM_003838                        | FPGT         | fuco-1-phosphate guanylyltransferase                            | ENST00000370898 | -0,718331574 |
| A_33_P3375934  | NM_005746                        | NAMPT        | nicotinamide phosphoribosyltransferase                          | ENST00000222553 | -0,718365325 |
| A_23_P120860   | NM_003634                        | NIPSNAP1     | nipsnap homolog 1 (C. elegans)                                  | ENST00000216121 | -0,718392235 |
| A_33_P3210735  | NM_001005210                     | LRRC55       | leucine rich repeat containing 55                               | ENST00000497933 | -0,718427154 |
| A_24_P586523   | NM_019109                        | ALG1         | asparagine-linked glycosylation 1, beta-1,4-mannosyltransferase | ENST00000533775 | -0,71859134  |
| A_23_P118246   | NM_016095                        | GINS2        | GINS complex subunit 2 (Psf2 homolog)                           | ENST00000253462 | -0,718643532 |
| A_24_P295806   | NM_023947                        | CHID1        | chitinase domain containing 1                                   | ENST00000528426 | -0,71885743  |
| A_24_P32085    | NM_024761                        | MOB3B        | MOB kinase activator 3B                                         | ENST00000262244 | -0,719067294 |
| A_33_P3349651  | NM_015055                        | SWAP70       | SWAP switching B-cell complex 70kDa subunit                     | ENST00000318950 | -0,719094676 |
| A_21_P0013840  | NR_039991                        | LOC100507404 | uncharacterized LOC100507404                                    | ENST00000433624 | -0,719568969 |
| A_24_P153568   | NM_001039396                     | MPEG1        | macrophage expressed 1                                          | ENST00000361050 | -0,719596814 |
| A_23_P17065    | NM_004591                        | CCL20        | chemokine (C-C motif) ligand 20                                 | ENST00000473642 | -0,71991467  |
| A_23_P121533   | NM_012445                        | SPON2        | spondin 2, extracellular matrix protein                         | ENST00000431380 | -0,719944355 |
| A_23_P304991   | NM_000411                        | HLC5         | holocarboxylase synthetase (biotin-(propionyl-CoA-carboxylase)  | ENST00000399120 | -0,720132965 |
| A_24_P185709   | NM_012156                        | EPB41L1      | erythrocyte membrane protein band 4.1-like 1                    | ENST00000344237 | -0,720149449 |
| A_23_P117852   | NM_014736                        | KIAA0101     | KIAA0101                                                        | ENST00000380258 | -0,720277517 |
| A_23_P71530    | NM_002546                        | TNFRSF11B    | tumor necrosis factor receptor superfamily, member 11b          | ENST00000521597 | -0,720512617 |
| A_24_P385313   | NM_002840                        | PTPRF        | protein tyrosine phosphatase, receptor type, F                  | ENST00000359947 | -0,720581225 |
| A_23_P105465   | NM_004072                        | CMKLR1       | chemokine-like receptor 1                                       | ENST00000550402 | -0,72070706  |
| A_33_P3300975  | NM_014620                        | HOXC4        | homeobox C4                                                     | ENST00000430889 | -0,720723302 |
| A_21_P0013479  | TCONS_I2_0002775; XLOC_I2_014197 |              |                                                                 |                 | -0,721193123 |
| A_33_P3229032  | NM_002975                        | CLEC11A      | C-type lectin domain family 11, member A                        | ENST00000445858 | -0,721193967 |
| A_23_P121533   | NM_012445                        | SPON2        | spondin 2, extracellular matrix protein                         | ENST00000431380 | -0,721194766 |
| A_32_P32856    | NM_032407                        | PCDHGC5      | protocadherin gamma subfamily C, 5                              | ENST00000252087 | -0,721221697 |
| A_23_P214821   | NM_001955                        | EDN1         | endothelin 1                                                    | ENST00000379375 | -0,721317891 |
| A_33_P3281283  | NM_005226                        | S1PR3        | sphingosine-1-phosphate receptor 3                              | ENST00000375846 | -0,721375742 |
| A_19_P00318494 | NR_026761                        | LINC00467    | long intergenic non-protein coding RNA 467                      |                 | -0,721406881 |
| A_23_P165598   | NM_001017920                     | DAPL1        | death associated protein-like 1                                 | ENST00000309950 | -0,72151469  |
| A_23_P166087   | NM_014737                        | RASSF2       | Ras association (RalGDS/AF-6) domain family member 2            | ENST00000379376 | -0,721567492 |

|               |                  |                |                                                                                                              |                 |              |
|---------------|------------------|----------------|--------------------------------------------------------------------------------------------------------------|-----------------|--------------|
| A_33_P3687198 | AK094730         | LOC283454      | uncharacterized LOC283454                                                                                    |                 | -0,721822019 |
| A_23_P103864  | NM_024525        | TTC13          | tetratricopeptide repeat domain 13                                                                           | ENST00000414259 | -0,721942718 |
| A_33_P3376636 | NM_001017989     | OPA3           | optic atrophy 3 (autosomal recessive, with chorea and spas                                                   | ENST00000323060 | -0,721953835 |
| A_33_P3347452 | NM_021135        | RPS6KA2        | ribosomal protein S6 kinase, 90kDa, polypeptide 2                                                            | ENST00000510118 | -0,722059344 |
| A_33_P3299915 | NR_040045        | FLJ35424       | uncharacterized FLJ35424                                                                                     | ENST00000404649 | -0,722110215 |
| A_23_P406350  | NM_138431        | MFSD3          | major facilitator superfamily domain containing 3                                                            | ENST00000301327 | -0,722233118 |
| A_33_P3330826 | NR_033937        | LOC100132077   | uncharacterized LOC100132077                                                                                 |                 | -0,722548632 |
| A_24_P158089  | NM_000602        | SERPINE1       | serpin peptidase inhibitor, clade E (nexin, plasminogen activator inhibitor type 1)                          | ENST00000445463 | -0,722628909 |
| A_33_P3229477 | NM_173496        | MPP7           | membrane protein, palmitoylated 7 (MAGUK p55 subfamily)                                                      | ENST00000337532 | -0,722759644 |
| A_21_P0012224 | ENST00000449602  | XLOC_I2_009140 |                                                                                                              | ENST00000449602 | -0,722865678 |
| A_23_P58321   | NM_001237        | CCNA2          | cyclin A2                                                                                                    | ENST00000274026 | -0,722989787 |
| A_21_P0012101 | ENST00000432711  | XLOC_I2_008396 |                                                                                                              | ENST00000432711 | -0,723152265 |
| A_32_P186027  | NM_006305        | ANP32A         | acidic (leucine-rich) nuclear phosphoprotein 32 family, member 1                                             | ENST00000409628 | -0,723156067 |
| A_21_P0000803 | NR_038434        | LOC100506474   | uncharacterized LOC100506474                                                                                 | ENST00000425974 | -0,723168654 |
| A_24_P324405  | NM_013275        | ANKRD11        | ankyrin repeat domain 11                                                                                     | ENST00000330736 | -0,723638825 |
| A_23_P31996   | NM_033051        | SLC46A2        | solute carrier family 46, member 2                                                                           | ENST00000374228 | -0,723669434 |
| A_33_P3271111 | NM_004148        | NINJ1          | ninjurin 1                                                                                                   | ENST00000489274 | -0,723740502 |
| A_32_P117170  | NM_001122838     | NAPEPLD        | N-acyl phosphatidylethanolamine phospholipase D                                                              | ENST00000341533 | -0,723748715 |
| A_33_P3369336 | NM_002054        | GCG            | glucagon                                                                                                     | ENST00000375497 | -0,723764929 |
| A_23_P207387  | NM_032484        | GHDC           | GH3 domain containing                                                                                        | ENST00000301671 | -0,723832293 |
| A_33_P3305758 | NM_001747        | CAPG           | capping protein (actin filament), gelsolin-like                                                              | ENST00000415012 | -0,723836539 |
| A_21_P0013613 | TCONS_I2_0002916 | XLOC_I2_015090 |                                                                                                              |                 | -0,723847012 |
| A_21_P0012521 | NR_033752        | LOC344887      | NmrA-like family domain containing 1 pseudogene                                                              | ENST00000416764 | -0,723853687 |
| A_24_P226008  | NM_007283        | MGLL           | monoglyceride lipase                                                                                         | ENST00000536024 | -0,7238874   |
| A_33_P3411427 | NM_001129730     | ZNF837         | zinc finger protein 837                                                                                      | ENST00000427624 | -0,724031108 |
| A_23_P52761   | NM_002423        | MMP7           | matrix metalloproteinase 7 (matrilysin, uterine)                                                             | ENST00000260227 | -0,724137086 |
| A_24_P348806  | NM_175058        | PLEKHA7        | pleckstrin homology domain containing, family A member 7                                                     | ENST00000448080 | -0,724562736 |
| A_23_P110624  | NM_001332        | CTNND2         | catenin (cadherin-associated protein), delta 2 (neural plakophilin-3 associated domain-containing protein 2) | ENST00000538638 | -0,724913768 |
| A_32_P69802   | NM_134431        | SLCO1A2        | solute carrier organic anion transporter family, member 1A                                                   | ENST00000452078 | -0,725137648 |

|                |                 |              |                                                             |                 |              |
|----------------|-----------------|--------------|-------------------------------------------------------------|-----------------|--------------|
| A_33_P3213707  | NM_025239       | PDCD1LG2     | programmed cell death 1 ligand 2                            | ENST00000397745 | -0,725321232 |
| A_24_P82074    | NM_017437       | CPSF2        | cleavage and polyadenylation specific factor 2, 100kDa      | ENST00000298875 | -0,72541595  |
| A_23_P360302   | NM_001522       | GUCY2F       | guanylate cyclase 2F, retinal                               | ENST00000218006 | -0,725642005 |
| A_24_P59494    | NM_020367       | PARP11       | poly (ADP-ribose) polymerase family, member 11              | ENST00000228820 | -0,725711335 |
| A_23_P121533   | NM_012445       | SPON2        | spondin 2, extracellular matrix protein                     | ENST00000431380 | -0,726007933 |
| A_21_P0003822  | TCONS_00008717  | XLOC_004231  |                                                             |                 | -0,726255096 |
| A_33_P3266863  | NM_024587       | TMEM53       | transmembrane protein 53                                    | ENST00000372237 | -0,726541517 |
| A_21_P0014410  | ENST00000442637 | LOC100507459 |                                                             | ENST00000442637 | -0,726742349 |
| A_21_P0014627  | XR_110765       | LOC100510007 | uncharacterized LOC100510007                                |                 | -0,727355134 |
| A_24_P54131    | NM_022836       | DCLRE1B      | DNA cross-link repair 1B                                    | ENST00000369563 | -0,727879452 |
| A_33_P3410351  | NM_000848       | GSTM2        | glutathione S-transferase mu 2 (muscle)                     | ENST00000476040 | -0,728185238 |
| A_33_P3416787  | XR_132931       | LOC100653080 | zinc finger protein 182-like                                |                 | -0,728317563 |
| A_21_P0000629  | NR_034072       | SARS         | seryl-tRNA synthetase                                       |                 | -0,728581377 |
| A_23_P163639   | NM_013275       | ANKRD11      | ankyrin repeat domain 11                                    | ENST00000378330 | -0,728725483 |
| A_23_P66117    | NM_032039       | ITFG3        | integrin alpha FG-GAP repeat containing 3                   | ENST00000301678 | -0,729258156 |
| A_21_P0009339  | TCONS_00025704  | XLOC_012530  |                                                             |                 | -0,729301292 |
| A_23_P110462   | NM_013340       | PCDHB1       | protocadherin beta 1                                        | ENST00000306549 | -0,729548795 |
| A_23_P79108    | NM_138813       | ATP8B3       | ATPase, aminophospholipid transporter, class I, type 8B, me | ENST00000531925 | -0,729887898 |
| A_23_P97457    | NM_022831       | AIDA         | axin interactor, dorsalization associated                   | ENST00000355727 | -0,729890999 |
| A_23_P1331     | NM_080801       | COL13A1      | collagen, type XIII, alpha 1                                | ENST00000478219 | -0,730042221 |
| A_23_P215634   | NM_001013398    | IGFBP3       | insulin-like growth factor binding protein 3                | ENST00000438491 | -0,730192113 |
| A_23_P55477    | NM_000676       | ADORA2B      | adenosine A2b receptor                                      | ENST00000304222 | -0,731335789 |
| A_23_P117852   | NM_014736       | KIAA0101     | KIAA0101                                                    | ENST00000380258 | -0,731380771 |
| A_23_P389102   | NM_015194       | MYO1D        | myosin ID                                                   | ENST00000318217 | -0,731804732 |
| A_33_P3399228  | NM_032808       | LINGO1       | leucine rich repeat and Ig domain containing 1              | ENST00000355300 | -0,731878104 |
| A_32_P75264    | NM_178505       | TMEM26       | transmembrane protein 26                                    | ENST00000399298 | -0,732201092 |
| A_24_P941148   | NM_017645       | HAUS6        | HAUS augmin-like complex, subunit 6                         | ENST00000380502 | -0,732270421 |
| A_32_P9543     | NM_145699       | APOBEC3A     | apolipoprotein B mRNA editing enzyme, catalytic polypepti   | ENST00000402255 | -0,732306195 |
| A_19_P00322173 | ENST00000454160 | XLOC_007602  |                                                             | ENST00000454160 | -0,732441966 |

|               |                  |                |                                                                  |                 |              |
|---------------|------------------|----------------|------------------------------------------------------------------|-----------------|--------------|
| A_23_P26557   | NM_025108        | C16orf59       | chromosome 16 open reading frame 59                              | ENST00000483320 | -0,732473962 |
| A_23_P118246  | NM_016095        | GIN52          | GIN5 complex subunit 2 (Psf2 homolog)                            | ENST00000253462 | -0,73257652  |
| A_23_P361940  | NM_003874        | CD84           | CD84 molecule                                                    | ENST00000368054 | -0,732604719 |
| A_21_P0005052 | TCONS_00012260   | XLOC_005811    |                                                                  |                 | -0,732778781 |
| A_23_P86900   | NM_006876        | B3GNT1         | UDP-GlcNAc:betaGal beta-1,3-N-acetylglucosaminyltransferase      | ENST00000311181 | -0,732815014 |
| A_23_P153640  | NM_032139        | ANKRD27        | ankyrin repeat domain 27 (VPS9 domain)                           | ENST00000306065 | -0,732913456 |
| A_24_P116606  | NM_130791        | WWOX           | WW domain containing oxidoreductase                              | ENST00000355860 | -0,73323259  |
| A_33_P3243907 | NM_001909        | CTSD           | cathepsin D                                                      | ENST00000433655 | -0,733285689 |
| A_23_P35399   | NM_145869        | ANXA11         | annexin A11                                                      | ENST00000537102 | -0,733889247 |
| A_23_P423197  | NM_002957        | RXRA           | retinoid X receptor, alpha                                       | ENST00000356384 | -0,733906112 |
| A_33_P3235568 | NM_001206540     | CAPZB          | capping protein (actin filament) muscle Z-line, beta             | ENST00000375142 | -0,733944311 |
| A_23_P71530   | NM_002546        | TNFRSF11B      | tumor necrosis factor receptor superfamily, member 11b           | ENST00000521597 | -0,734443623 |
| A_23_P114466  | NM_033284        | TBL1Y          | transducin (beta)-like 1, Y-linked                               | ENST00000383032 | -0,734747999 |
| A_23_P48803   | NM_014548        | TMOD2          | tropomodulin 2 (neuronal)                                        | ENST00000539962 | -0,734770716 |
| A_33_P3318117 | NM_000765        | CYP3A7         | cytochrome P450, family 3, subfamily A, polypeptide 7            | ENST00000292414 | -0,734776505 |
| A_21_P0013881 | TCONS_I2_0003090 | XLOC_I2_015893 |                                                                  |                 | -0,735039753 |
| A_24_P416997  | NM_145641        | APOL3          | apolipoprotein L, 3                                              | ENST00000397287 | -0,735144886 |
| A_21_P0012728 | ENST00000508572  | XLOC_I2_010697 |                                                                  | ENST00000508572 | -0,735240204 |
| A_23_P120467  | NM_199427        | ZFP64          | zinc finger protein 64 homolog (mouse)                           | ENST00000361387 | -0,735859277 |
| A_23_P122976  | NM_002069        | GNAI1          | guanine nucleotide binding protein (G protein), alpha inhibitory | ENST00000351004 | -0,735915393 |
| A_23_P397341  | NM_152341        | PAQR4          | progesterone and adipoQ receptor family member IV                | ENST00000293978 | -0,735957095 |
| A_33_P3336760 | NM_018849        | ABCB4          | ATP-binding cassette, sub-family B (MDR/TAP), member 4           | ENST00000265723 | -0,736747517 |
| A_23_P216655  | NM_014788        | TRIM14         | tripartite motif containing 14                                   | ENST00000341469 | -0,736863099 |
| A_23_P80032   | NM_005225        | E2F1           | E2F transcription factor 1                                       | ENST00000343380 | -0,737089597 |
| A_23_P215634  | NM_001013398     | IGFBP3         | insulin-like growth factor binding protein 3                     | ENST00000438491 | -0,737099242 |
| A_23_P58321   | NM_001237        | CCNA2          | cyclin A2                                                        | ENST00000274026 | -0,737129974 |
| A_33_P3832872 | NR_033995        | LOC389247      | uncharacterized LOC389247                                        |                 | -0,737166174 |
| A_23_P350512  | NM_021641        | ADAM12         | ADAM metalloproteinase domain 12                                 | ENST00000368676 | -0,737258392 |
| A_23_P50250   | NM_001824        | CKM            | creatine kinase, muscle                                          | ENST00000221476 | -0,737368626 |



|               |                 |                |                                                                       |                 |              |
|---------------|-----------------|----------------|-----------------------------------------------------------------------|-----------------|--------------|
| A_23_P393880  | NM_020340       | KIAA1244       | KIAA1244                                                              | ENST00000251691 | -0,737500613 |
| A_23_P214821  | NM_001955       | EDN1           | endothelin 1                                                          | ENST00000379375 | -0,737557033 |
| A_33_P3360728 | NM_000713       | BLVRB          | biliverdin reductase B (flavin reductase (NADPH))                     | ENST00000263368 | -0,737677389 |
| A_23_P334955  | NM_053279       | FAM167A        | family with sequence similarity 167, member A                         | ENST00000284486 | -0,737919762 |
| A_23_P214821  | NM_001955       | EDN1           | endothelin 1                                                          | ENST00000379375 | -0,738190645 |
| A_23_P148446  | NM_003336       | UBE2A          | ubiquitin-conjugating enzyme E2A                                      | ENST00000371569 | -0,738190695 |
| A_23_P121564  | NM_000857       | GUCY1B3        | guanylate cyclase 1, soluble, beta 3                                  | ENST00000264424 | -0,738251622 |
| A_23_P108823  | NM_032523       | OSBPL6         | oxysterol binding protein-like 6                                      | ENST00000315022 | -0,738329269 |
| A_23_P104876  | NM_017425       | SPA17          | sperm autoantigenic protein 17                                        | ENST00000524614 | -0,738504318 |
| A_23_P1014    | NR_026761       | LINC00467      | long intergenic non-protein coding RNA 467                            |                 | -0,738759397 |
| A_23_P62890   | NM_002053       | GBP1           | guanylate binding protein 1, interferon-inducible                     | ENST00000370473 | -0,738858517 |
| A_33_P3287631 | NM_147780       | CTSB           | cathepsin B                                                           | ENST00000434271 | -0,739059801 |
| A_23_P105562  | NM_000552       | VWF            | von Willebrand factor                                                 | ENST00000261405 | -0,739235844 |
| A_23_P258393  | NM_144641       | PPM1M          | protein phosphatase, Mg <sup>2+</sup> /Mn <sup>2+</sup> dependent, 1M | ENST00000323588 | -0,739366183 |
| A_21_P0010882 | ENST00000443523 | XLOC_l2_001986 |                                                                       | ENST00000443523 | -0,7396006   |
| A_23_P104438  | NM_032578       | MYPN           | myopalladin                                                           | ENST00000354393 | -0,739613823 |
| A_24_P150486  | NM_004863       | SPTLC2         | serine palmitoyltransferase, long chain base subunit 2                | ENST00000216484 | -0,739675941 |
| A_33_P3424067 | NM_017635       | SUV420H1       | suppressor of variegation 4-20 homolog 1 (Drosophila)                 | ENST00000304363 | -0,739907074 |
| A_24_P349965  | NM_007109       | TCF19          | transcription factor 19                                               | ENST00000400401 | -0,740100523 |
| A_23_P37983   | NM_005947       | MT1B           | metallothionein 1B                                                    | ENST00000334346 | -0,740108612 |
| A_21_P0004544 | TCONS_00010853  | XLOC_004670    |                                                                       |                 | -0,740470337 |
| A_23_P105562  | NM_000552       | VWF            | von Willebrand factor                                                 | ENST00000261405 | -0,740704305 |
| A_23_P122077  | NM_016591       | GCNT4          | glucosaminyl (N-acetyl) transferase 4, core 2                         | ENST00000322348 | -0,740732505 |
| A_23_P24616   | NM_170601       | SIAE           | sialic acid acetyltransferase                                         | ENST00000545756 | -0,740797432 |
| A_23_P118246  | NM_016095       | GINS2          | GINS complex subunit 2 (Psf2 homolog)                                 | ENST00000253462 | -0,740817674 |
| A_23_P112452  | NR_003191       | GGTA1P         | glycoprotein, alpha-galactosyltransferase 1 pseudogene                | ENST00000373793 | -0,740889815 |
| A_24_P158089  | NM_000602       | SERPINE1       | serpin peptidase inhibitor, clade E (nexin, plasminogen activ         | ENST00000445463 | -0,741331446 |
| A_24_P158089  | NM_000602       | SERPINE1       | serpin peptidase inhibitor, clade E (nexin, plasminogen activ         | ENST00000445463 | -0,741439049 |
| A_24_P753476  | NR_002942       | LOC340508      | growth arrest-specific 2 like 1 pseudogene                            |                 | -0,74146126  |

|               |                                 |             |                                                              |                 |              |
|---------------|---------------------------------|-------------|--------------------------------------------------------------|-----------------|--------------|
| A_23_P118246  | NM_016095                       | GINS2       | GINS complex subunit 2 (Psf2 homolog)                        | ENST00000253462 | -0,741594742 |
| A_23_P38784   | NM_014385                       | SIGLEC7     | sialic acid binding Ig-like lectin 7                         | ENST00000317643 | -0,741598131 |
| A_23_P104438  | NM_032578                       | MYPN        | myopalladin                                                  | ENST00000354393 | -0,741658863 |
| A_33_P3270514 | NR_003679                       | NBLA00301   | Nbla00301                                                    | ENST00000512246 | -0,741666959 |
| A_21_P0004215 | BC035069                        | XLOC_004268 |                                                              |                 | -0,741873905 |
| A_23_P80032   | NM_005225                       | E2F1        | E2F transcription factor 1                                   | ENST00000343380 | -0,742072683 |
| A_23_P112452  | NR_003191                       | GGTA1P      | glycoprotein, alpha-galactosyltransferase 1 pseudogene       | ENST00000373793 | -0,742119865 |
| A_33_P3268532 | NM_001018073                    | PCK2        | phosphoenolpyruvate carboxykinase 2 (mitochondrial)          | ENST00000396973 | -0,742281181 |
| A_23_P60248   | NM_003329                       | TXN         | thioredoxin                                                  | ENST00000487892 | -0,742348259 |
| A_23_P366366  | NM_014766                       | SCRN1       | secernin 1                                                   | ENST00000426154 | -0,74236659  |
| A_24_P247026  | NM_001008226                    | FAM154B     | family with sequence similarity 154, member B                | ENST00000339465 | -0,742607647 |
| A_23_P420256  | NM_021925                       | C2orf43     | chromosome 2 open reading frame 43                           | ENST00000237822 | -0,742616006 |
| A_21_P0011685 | TCONS_I2_0001242(XLOC_I2_006665 |             |                                                              |                 | -0,742749542 |
| A_23_P129014  | NM_145231                       | EFCAB11     | EF-hand calcium binding domain 11                            | ENST00000553871 | -0,742798063 |
| A_23_P61127   | NM_024122                       | APOO        | apolipoprotein O                                             | ENST00000490078 | -0,743166905 |
| A_33_P3305482 | NM_020365                       | EIF2B3      | eukaryotic translation initiation factor 2B, subunit 3 gamma | ENST00000360403 | -0,743176122 |
| A_21_P0000186 | NM_001242812                    | LOC284385   | uncharacterized LOC284385                                    |                 | -0,743318178 |
| A_33_P3315425 | NM_022840                       | METTL4      | methyltransferase like 4                                     | ENST00000319888 | -0,743704959 |
| A_23_P117852  | NM_014736                       | KIAA0101    | KIAA0101                                                     | ENST00000380258 | -0,743713884 |
| A_33_P3242863 | NM_020201                       | NT5M        | 5',3'-nucleotidase, mitochondrial                            | ENST00000389022 | -0,743717302 |
| A_21_P0005938 | TCONS_00015286                  | XLOC_006821 |                                                              |                 | -0,743854033 |
| A_23_P126752  | NM_004930                       | CAPZB       | capping protein (actin filament) muscle Z-line, beta         | ENST00000375145 | -0,744071019 |
| A_23_P79231   | NM_134442                       | CREB1       | cAMP responsive element binding protein 1                    | ENST00000432329 | -0,744780754 |
| A_23_P200489  | NM_014698                       | TMEM63A     | transmembrane protein 63A                                    | ENST00000366835 | -0,744814111 |
| A_23_P112452  | NR_003191                       | GGTA1P      | glycoprotein, alpha-galactosyltransferase 1 pseudogene       | ENST00000373793 | -0,744818871 |
| A_23_P302550  | NM_130782                       | RGS18       | regulator of G-protein signaling 18                          | ENST00000367460 | -0,744917478 |
| A_23_P112061  | NM_152419                       | HGSNAT      | heparan-alpha-glucosaminide N-acetyltransferase              | ENST00000458501 | -0,744962214 |
| A_21_P0002866 | ENST00000484675                 | XLOC_003190 |                                                              | ENST00000484675 | -0,745036672 |
| A_24_P407930  | NM_031216                       | SEH1L       | SEH1-like ( <i>S. cerevisiae</i> )                           | ENST00000262124 | -0,7451036   |

|               |                 |              |                                                                                     |                 |              |
|---------------|-----------------|--------------|-------------------------------------------------------------------------------------|-----------------|--------------|
| A_23_P315571  | NM_015150       | RFTN1        | raftlin, lipid raft linker 1                                                        | ENST00000334133 | -0,745180093 |
| A_24_P158089  | NM_000602       | SERPINE1     | serpin peptidase inhibitor, clade E (nexin, plasminogen activator inhibitor type 1) | ENST00000445463 | -0,745224879 |
| A_23_P67847   | NM_024572       | GALNT14      | UDP-N-acetyl-alpha-D-galactosamine:polypeptide N-acetyltransferase 14               | ENST00000356174 | -0,745274812 |
| A_33_P3638471 | BC027954        | TRGV7        | T cell receptor gamma variable 7 (pseudogene)                                       |                 | -0,745327483 |
| A_21_P0007486 | ENST00000400306 | XLOC_009791  |                                                                                     | ENST00000400306 | -0,745638661 |
| A_24_P318656  | NM_000212       | ITGB3        | integrin, beta 3 (platelet glycoprotein IIIa, antigen CD61)                         | ENST00000262017 | -0,745755689 |
| A_23_P306890  | NM_007195       | POLI         | polymerase (DNA directed) iota                                                      | ENST00000217800 | -0,745854625 |
| A_33_P3249037 | ENST00000370354 | PRRG3        | proline rich Gla (G-carboxyglutamic acid) 3 (transmembrane protein)                 | ENST00000370354 | -0,746162277 |
| A_21_P0009570 | THC2717186      | XLOC_012875  |                                                                                     |                 | -0,746162914 |
| A_21_P0007227 | TCONS_00019361  | XLOC_009187  |                                                                                     |                 | -0,746347734 |
| A_23_P18692   | NM_000671       | ADH5         | alcohol dehydrogenase 5 (class III), chi polypeptide                                | ENST00000296412 | -0,746506868 |
| A_23_P103864  | NM_024525       | TTC13        | tetratricopeptide repeat domain 13                                                  | ENST00000414259 | -0,746554549 |
| A_33_P3286278 | NM_002087       | GRN          | granulin                                                                            | ENST00000053867 | -0,746684122 |
| A_21_P0002377 | AK096937        | LOC285191    | uncharacterized LOC285191                                                           | ENST00000407635 | -0,747034742 |
| A_23_P120467  | NM_199427       | ZFP64        | zinc finger protein 64 homolog (mouse)                                              | ENST00000361387 | -0,747450129 |
| A_21_P0014947 | ENST00000541151 | LOC100507404 |                                                                                     | ENST00000541151 | -0,747457297 |
| A_33_P3226810 | NM_003810       | TNFSF10      | tumor necrosis factor (ligand) superfamily, member 10                               | ENST00000241261 | -0,747503075 |
| A_23_P114983  | NM_032588       | TRIM63       | tripartite motif containing 63                                                      | ENST00000374272 | -0,747839921 |
| A_23_P117852  | NM_014736       | KIAA0101     | KIAA0101                                                                            | ENST00000380258 | -0,748360612 |
| A_23_P358009  | NM_015291       | DNAJC16      | DnaJ (Hsp40) homolog, subfamily C, member 16                                        | ENST00000475133 | -0,748562574 |
| A_21_P0008673 | TCONS_00023505  | XLOC_011350  |                                                                                     |                 | -0,748616003 |
| A_23_P11841   | NM_001684       | ATP2B4       | ATPase, Ca <sup>++</sup> transporting, plasma membrane 4                            | ENST00000341360 | -0,748684504 |
| A_23_P122077  | NM_016591       | GCNT4        | glucosaminyl (N-acetyl) transferase 4, core 2                                       | ENST00000322348 | -0,748966279 |
| A_23_P75769   | NM_024021       | MS4A4A       | membrane-spanning 4-domains, subfamily A, member 4                                  | ENST00000529991 | -0,749104658 |
| A_24_P597190  | NR_027503       | LOC100133050 | glucuronidase, beta pseudogene                                                      |                 | -0,749236223 |
| A_33_P3286146 | NR_033652       | LOC100132891 | uncharacterized LOC100132891                                                        | ENST00000457356 | -0,749249972 |
| A_23_P372946  | NM_138461       | TM4SF19      | transmembrane 4 L six family member 19                                              | ENST00000442633 | -0,749260352 |
| A_33_P3242649 | NM_031217       | KIF18A       | kinesin family member 18A                                                           | ENST00000263181 | -0,749317951 |
| A_23_P218412  | NM_004890       | SPAG7        | sperm associated antigen 7                                                          | ENST00000206020 | -0,749380802 |

|               |                 |              |                                                            |                 |              |
|---------------|-----------------|--------------|------------------------------------------------------------|-----------------|--------------|
| A_21_P0003482 | ENST00000510169 | XLOC_004002  |                                                            | ENST00000510169 | -0,749492267 |
| A_23_P11201   | NM_001097579    | GPR34        | G protein-coupled receptor 34                              | ENST00000535368 | -0,749972628 |
| A_23_P151059  | NM_018088       | FAM90A1      | family with sequence similarity 90, member A1              | ENST00000538603 | -0,750062492 |
| A_32_P52911   | NM_018269       | ADI1         | acireductone dioxygenase 1                                 | ENST00000327435 | -0,75010352  |
| A_23_P500130  | NM_153186       | KANK1        | KN motif and ankyrin repeat domains 1                      | ENST00000382289 | -0,750329032 |
| A_23_P210176  | NM_000210       | ITGA6        | integrin, alpha 6                                          | ENST00000264107 | -0,750559512 |
| A_33_P3418170 | NM_014314       | DDX58        | DEAD (Asp-Glu-Ala-Asp) box polypeptide 58                  | ENST00000379882 | -0,750637645 |
| A_23_P371729  | NM_005266       | GJA5         | gap junction protein, alpha 5, 40kDa                       | ENST00000369237 | -0,750722077 |
| A_23_P29005   | NM_022136       | SAMSN1       | SAM domain, SH3 domain and nuclear localization signals 1  | ENST00000400566 | -0,750827446 |
| A_23_P1331    | NM_080801       | COL13A1      | collagen, type XIII, alpha 1                               | ENST00000478219 | -0,751066813 |
| A_23_P134078  | NM_004824       | CDYL         | chromodomain protein, Y-like                               | ENST00000328908 | -0,751274093 |
| A_33_P3251552 | NM_001029871    | RSPO4        | R-spondin 4                                                | ENST00000217260 | -0,751377037 |
| A_21_P0014077 | NR_040772       | LOC100505666 | uncharacterized LOC100505666                               | ENST00000452962 | -0,751935987 |
| A_23_P145606  | NM_001006630    | CHRM2        | cholinergic receptor, muscarinic 2                         | ENST00000320658 | -0,752026593 |
| A_23_P78543   | NM_005498       | AP1M2        | adaptor-related protein complex 1, mu 2 subunit            | ENST00000250244 | -0,752400963 |
| A_33_P3312686 | NM_198512       | DGAT2L6      | diacylglycerol O-acyltransferase 2-like 6                  |                 | -0,752795221 |
| A_23_P165624  | NM_007115       | TNFAIP6      | tumor necrosis factor, alpha-induced protein 6             | ENST00000460812 | -0,752831704 |
| A_23_P208334  | NM_006202       | PDE4A        | phosphodiesterase 4A, cAMP-specific                        | ENST00000419866 | -0,752910431 |
| A_23_P1014    | NR_026761       | LINC00467    | long intergenic non-protein coding RNA 467                 |                 | -0,752984818 |
| A_23_P31896   | NM_003033       | ST3GAL1      | ST3 beta-galactoside alpha-2,3-sialyltransferase 1         | ENST00000522652 | -0,75307085  |
| A_33_P3234202 | NM_004944       | DNASE1L3     | deoxyribonuclease I-like 3                                 | ENST00000394549 | -0,753138479 |
| A_23_P215634  | NM_001013398    | IGFBP3       | insulin-like growth factor binding protein 3               | ENST00000438491 | -0,753301056 |
| A_23_P112061  | NM_152419       | HGSNAT       | heparan-alpha-glucosaminide N-acetyltransferase            | ENST00000458501 | -0,753307035 |
| A_23_P11201   | NM_001097579    | GPR34        | G protein-coupled receptor 34                              | ENST00000535368 | -0,75332159  |
| A_23_P134854  | NM_194284       | CLDN23       | claudin 23                                                 | ENST00000519106 | -0,753516309 |
| A_24_P618401  | NR_034121       | LOC100131067 | uncharacterized LOC100131067                               | ENST00000501927 | -0,753615914 |
| A_21_P0002506 | TCONS_00004454  | XLOC_002331  |                                                            |                 | -0,753693603 |
| A_33_P3291176 | NM_001017921    | VMAC         | vimentin-type intermediate filament associated coiled-coil | ENST00000339485 | -0,753757956 |
| A_21_P0003020 | TCONS_00006187  | XLOC_002788  |                                                            |                 | -0,753889387 |

|                |                  |                |                                                                                     |                 |              |
|----------------|------------------|----------------|-------------------------------------------------------------------------------------|-----------------|--------------|
| A_23_P79251    | NM_014600        | EHD3           | EH-domain containing 3                                                              | ENST00000541626 | -0,754086464 |
| A_23_P74895    | NM_024674        | LIN28A         | lin-28 homolog A (C. elegans)                                                       | ENST00000254231 | -0,754173053 |
| A_19_P00322314 | ENST00000514050  | XLOC_I2_011173 |                                                                                     | ENST00000514050 | -0,754931462 |
| A_24_P48204    | NM_003004        | SECTM1         | secreted and transmembrane 1                                                        | ENST00000269389 | -0,754949387 |
| A_23_P112061   | NM_152419        | HGSNAT         | heparan-alpha-glucosaminide N-acetyltransferase                                     | ENST00000458501 | -0,75495303  |
| A_23_P105862   | NM_023037        | FRY            | furry homolog (Drosophila)                                                          | ENST00000380257 | -0,754995509 |
| A_23_P359245   | NM_000245        | MET            | met proto-oncogene (hepatocyte growth factor receptor)                              | ENST00000397752 | -0,755127701 |
| A_23_P137931   | NM_000677        | ADORA3         | adenosine A3 receptor                                                               | ENST00000241356 | -0,755212977 |
| A_23_P114983   | NM_032588        | TRIM63         | tripartite motif containing 63                                                      | ENST00000374272 | -0,755234338 |
| A_23_P105862   | NM_023037        | FRY            | furry homolog (Drosophila)                                                          | ENST00000380257 | -0,755300258 |
| A_24_P158089   | NM_000602        | SERPINE1       | serpin peptidase inhibitor, clade E (nexin, plasminogen activator inhibitor type 1) | ENST00000445463 | -0,75550604  |
| A_33_P3348782  | NM_030622        | CYP2S1         | cytochrome P450, family 2, subfamily S, polypeptide 1                               | ENST00000301173 | -0,755585376 |
| A_21_P0010947  | ENST00000443523  | XLOC_I2_001986 |                                                                                     | ENST00000443523 | -0,75576651  |
| A_23_P256956   | NM_005733        | KIF20A         | kinesin family member 20A                                                           | ENST00000502338 | -0,756320124 |
| A_23_P39375    | NM_018316        | KLHL26         | kelch-like 26 (Drosophila)                                                          | ENST00000300976 | -0,756328394 |
| A_21_P0013589  | XR_108989        | LOC100507540   | uncharacterized LOC100507540                                                        |                 | -0,756399743 |
| A_23_P11841    | NM_001684        | ATP2B4         | ATPase, Ca++ transporting, plasma membrane 4                                        | ENST00000341360 | -0,756488352 |
| A_23_P214821   | NM_001955        | EDN1           | endothelin 1                                                                        | ENST00000379375 | -0,756571755 |
| A_33_P3240018  | NM_000922        | PDE3B          | phosphodiesterase 3B, cGMP-inhibited                                                | ENST00000282096 | -0,7571814   |
| A_21_P0013652  | TCONS_I2_0002934 | XLOC_I2_015213 |                                                                                     |                 | -0,757252141 |
| A_23_P112452   | NR_003191        | GGTA1P         | glycoprotein, alpha-galactosyltransferase 1 pseudogene                              | ENST00000373793 | -0,757545396 |
| A_33_P3467126  | NM_033107        | GTPBP10        | GTP-binding protein 10 (putative)                                                   | ENST00000257659 | -0,757690236 |
| A_23_P101084   | NM_032598        | SPATA22        | spermatogenesis associated 22                                                       | ENST00000541913 | -0,757730267 |
| A_21_P0008685  | TCONS_00023533   | XLOC_011368    |                                                                                     |                 | -0,757768065 |
| A_24_P322354   | NM_001039535     | SKA1           | spindle and kinetochore associated complex subunit 1                                | ENST00000398452 | -0,757933238 |
| A_21_P0011831  | TCONS_I2_0001385 | XLOC_I2_007456 |                                                                                     |                 | -0,757966644 |
| A_23_P105562   | NM_000552        | VWF            | von Willebrand factor                                                               | ENST00000261405 | -0,758002491 |
| A_23_P55251    | NM_002204        | ITGA3          | integrin, alpha 3 (antigen CD49C, alpha 3 subunit of VLA-3 receptor)                | ENST00000505306 | -0,758643839 |
| A_21_P0005592  | ENST00000480919  | XLOC_006326    |                                                                                     | ENST00000480919 | -0,758665644 |



|               |                |             |                                                               |                 |              |
|---------------|----------------|-------------|---------------------------------------------------------------|-----------------|--------------|
| A_32_P197489  | NM_015995      | KLF13       | Kruppel-like factor 13                                        | ENST00000307145 | -0,758797335 |
| A_23_P121657  | NM_005114      | HS3ST1      | heparan sulfate (glucosamine) 3-O-sulfotransferase 1          | ENST00000002596 | -0,758808058 |
| A_24_P158089  | NM_000602      | SERPINE1    | serpin peptidase inhibitor, clade E (nexin, plasminogen activ | ENST00000445463 | -0,759211059 |
| A_23_P118246  | NM_016095      | GINS2       | GINS complex subunit 2 (Psf2 homolog)                         | ENST00000253462 | -0,759274899 |
| A_23_P71530   | NM_002546      | TNFRSF11B   | tumor necrosis factor receptor superfamily, member 11b        | ENST00000521597 | -0,759343479 |
| A_23_P1014    | NR_026761      | LINC00467   | long intergenic non-protein coding RNA 467                    |                 | -0,759431192 |
| A_23_P73097   | NM_170587      | RGS20       | regulator of G-protein signaling 20                           | ENST00000276500 | -0,759441347 |
| A_33_P3246763 | NM_001166579   | AANAT       | aralkylamine N-acetyltransferase                              | ENST00000250615 | -0,759772389 |
| A_23_P26810   | NM_000546      | TP53        | tumor protein p53                                             | ENST00000396473 | -0,760604371 |
| A_23_P1014    | NR_026761      | LINC00467   | long intergenic non-protein coding RNA 467                    |                 | -0,760724592 |
| A_23_P256956  | NM_005733      | KIF20A      | kinesin family member 20A                                     | ENST00000502338 | -0,760729668 |
| A_21_P0009568 | TCONS_00026546 | XLOC_012866 |                                                               |                 | -0,760937007 |
| A_33_P3418394 | NM_004707      | ATG12       | ATG12 autophagy related 12 homolog (S. cerevisiae)            | ENST00000509910 | -0,761732055 |
| A_23_P58321   | NM_001237      | CCNA2       | cyclin A2                                                     | ENST00000274026 | -0,762055811 |
| A_23_P58321   | NM_001237      | CCNA2       | cyclin A2                                                     | ENST00000274026 | -0,76220224  |
| A_23_P71530   | NM_002546      | TNFRSF11B   | tumor necrosis factor receptor superfamily, member 11b        | ENST00000521597 | -0,762274899 |
| A_23_P256473  | NM_006379      | SEMA3C      | sema domain, immunoglobulin domain (Ig), short basic don      | ENST00000265361 | -0,762629089 |
| A_24_P83738   | NM_198188      | ASTN2       | astrotactin 2                                                 | ENST00000361477 | -0,762738431 |
| A_21_P0002968 | TCONS_00006076 | XLOC_002690 |                                                               |                 | -0,762795376 |
| A_33_P3369567 | NM_001242932   | LSP1        | lymphocyte-specific protein 1                                 | ENST00000484895 | -0,762984934 |
| A_32_P345659  | NM_194293      | XIRP1       | xin actin-binding repeat containing 1                         | ENST00000421646 | -0,763111349 |
| A_23_P112061  | NM_152419      | HGSNAT      | heparan-alpha-glucosaminide N-acetyltransferase               | ENST00000458501 | -0,763188317 |
| A_23_P118246  | NM_016095      | GINS2       | GINS complex subunit 2 (Psf2 homolog)                         | ENST00000253462 | -0,763189902 |
| A_33_P3369371 | NM_002084      | GPX3        | glutathione peroxidase 3 (plasma)                             | ENST00000388825 | -0,76330655  |
| A_23_P149813  | NM_012425      | RSU1        | Ras suppressor protein 1                                      | ENST00000377921 | -0,763761903 |
| A_23_P104876  | NM_017425      | SPA17       | sperm autoantigenic protein 17                                | ENST00000524614 | -0,763796467 |
| A_23_P406025  | NM_015225      | PRUNE2      | prune homolog 2 (Drosophila)                                  | ENST00000428286 | -0,763849944 |
| A_23_P114466  | NM_033284      | TBL1Y       | transducin (beta)-like 1, Y-linked                            | ENST00000383032 | -0,763871145 |
| A_23_P20392   | NM_015310      | PSD3        | pleckstrin and Sec7 domain containing 3                       | ENST00000440756 | -0,76404446  |

|               |                 |              |                                                                         |                 |              |
|---------------|-----------------|--------------|-------------------------------------------------------------------------|-----------------|--------------|
| A_21_P0013590 | XR_108989       | LOC100507540 | uncharacterized LOC100507540                                            |                 | -0,764101968 |
| A_23_P112452  | NR_003191       | GGTA1P       | glycoprotein, alpha-galactosyltransferase 1 pseudogene                  | ENST00000373793 | -0,764260655 |
| A_23_P112061  | NM_152419       | HGSNAT       | heparan-alpha-glucosaminide N-acetyltransferase                         | ENST00000458501 | -0,764443545 |
| A_24_P122403  | NM_003198       | TCEB3        | transcription elongation factor B (SIII), polypeptide 3 (110kD)         | ENST00000418390 | -0,764460624 |
| A_33_P3253249 | NM_002032       | FTH1         | ferritin, heavy polypeptide 1                                           | ENST00000534180 | -0,764641541 |
| A_23_P422071  | NM_003782       | B3GALT4      | UDP-Gal:betaGlcNAc beta 1,3-galactosyltransferase, polypeptide 4        | ENST00000383209 | -0,764746244 |
| A_23_P110791  | NM_005211       | CSF1R        | colony stimulating factor 1 receptor                                    | ENST00000286301 | -0,764831111 |
| A_33_P3409139 | NR_015409       | LOC143188    | uncharacterized LOC143188                                               |                 | -0,764969216 |
| A_33_P3309621 | NR_002804       | SIGLECP3     | sialic acid binding Ig-like lectin, pseudogene 3                        | ENST00000341811 | -0,765054866 |
| A_21_P0006726 | ENST00000418372 | XLOC_008700  |                                                                         | ENST00000418372 | -0,765113677 |
| A_32_P85539   | NM_013320       | HCFC2        | host cell factor C2                                                     |                 | -0,765462359 |
| A_23_P94412   | NM_025239       | PDCD1LG2     | programmed cell death 1 ligand 2                                        | ENST00000397747 | -0,765705222 |
| A_23_P117852  | NM_014736       | KIAA0101     | KIAA0101                                                                | ENST00000380258 | -0,765706058 |
| A_24_P81900   | NM_006931       | SLC2A3       | solute carrier family 2 (facilitated glucose transporter), member 3     | ENST00000486749 | -0,765873647 |
| A_23_P104318  | NM_019058       | DDIT4        | DNA-damage-inducible transcript 4                                       | ENST00000307365 | -0,766032899 |
| A_23_P104318  | NM_019058       | DDIT4        | DNA-damage-inducible transcript 4                                       | ENST00000307365 | -0,766126067 |
| A_23_P112061  | NM_152419       | HGSNAT       | heparan-alpha-glucosaminide N-acetyltransferase                         | ENST00000458501 | -0,766337819 |
| A_33_P3261710 | NR_015446       | FTLP10       | ferritin, light polypeptide pseudogene 10                               | ENST00000503647 | -0,766724895 |
| A_23_P104318  | NM_019058       | DDIT4        | DNA-damage-inducible transcript 4                                       | ENST00000307365 | -0,766787975 |
| A_23_P887     | NM_014002       | IKBKE        | inhibitor of kappa light polypeptide gene enhancer in B-cells 1 epsilon | ENST00000537984 | -0,76709531  |
| A_32_P70135   | NM_025138       | PROSER1      | proline and serine rich 1                                               | ENST00000350125 | -0,76726248  |
| A_23_P138725  | NM_031484       | MARVELD1     | MARVEL domain containing 1                                              | ENST00000285605 | -0,767389514 |
| A_23_P118     | NM_001439       | EXTL2        | exostoses (multiple)-like 2                                             | ENST00000370114 | -0,767557542 |
| A_33_P3259890 | NR_033932       | FLJ35946     | uncharacterized protein FLJ35946                                        | ENST00000515003 | -0,767685043 |
| A_23_P112554  | NM_001855       | COL15A1      | collagen, type XV, alpha 1                                              | ENST00000375001 | -0,768154137 |
| A_23_P104318  | NM_019058       | DDIT4        | DNA-damage-inducible transcript 4                                       | ENST00000307365 | -0,768223745 |
| A_23_P352266  | NM_000633       | BCL2         | B-cell CLL/lymphoma 2                                                   | ENST00000398117 | -0,768517357 |
| A_33_P3250133 | NM_019086       | VSIG10       | V-set and immunoglobulin domain containing 10                           | ENST00000359236 | -0,768678002 |
| A_23_P300033  | NM_006206       | PDGFRA       | platelet-derived growth factor receptor, alpha polypeptide              | ENST00000257290 | -0,769144998 |

|                |                                 |             |                                                           |                 |              |
|----------------|---------------------------------|-------------|-----------------------------------------------------------|-----------------|--------------|
| A_23_P112452   | NR_003191                       | GGTA1P      | glycoprotein, alpha-galactosyltransferase 1 pseudogene    | ENST00000373793 | -0,769388679 |
| A_33_P3340769  | NM_003816                       | ADAM9       | ADAM metallopeptidase domain 9                            |                 | -0,769401649 |
| A_24_P39101    | NM_031954                       | KCTD10      | potassium channel tetramerisation domain containing 10    | ENST00000228495 | -0,769405205 |
| A_23_P212159   | NM_024923                       | NUP210      | nucleoporin 210kDa                                        | ENST00000254508 | -0,76947565  |
| A_23_P112554   | NM_001855                       | COL15A1     | collagen, type XV, alpha 1                                | ENST00000375001 | -0,769772728 |
| A_21_P0012179  | TCONS_I2_0001713:XLOC_I2_009134 |             |                                                           |                 | -0,769782337 |
| A_21_P0000568  | NR_028471                       | LOC644649   | apolipoprotein O pseudogene                               |                 | -0,769902202 |
| A_23_P117852   | NM_014736                       | KIAA0101    | KIAA0101                                                  | ENST00000380258 | -0,770092504 |
| A_23_P200728   | NM_000569                       | FCGR3A      | Fc fragment of IgG, low affinity IIIa, receptor (CD16a)   | ENST00000426740 | -0,770392776 |
| A_21_P0006902  | AK023036                        | LINC00263   | long intergenic non-protein coding RNA 263                |                 | -0,770485965 |
| A_33_P3389023  | NM_024592                       | SRD5A3      | steroid 5 alpha-reductase 3                               | ENST00000264228 | -0,770807245 |
| A_23_P110791   | NM_005211                       | CSF1R       | colony stimulating factor 1 receptor                      | ENST00000286301 | -0,771314496 |
| A_21_P0003409  | ENST00000515860                 | XLOC_003709 |                                                           | ENST00000515860 | -0,771452965 |
| A_33_P3787635  | NR_036595                       | LOC440600   | uncharacterized LOC440600                                 |                 | -0,771495098 |
| A_21_P0000160  | NM_138461                       | TM4SF19     | transmembrane 4 L six family member 19                    | ENST00000273695 | -0,771628036 |
| A_21_P0001128  | ENST00000420876                 | XLOC_000822 |                                                           | ENST00000420876 | -0,771642398 |
| A_21_P0009712  | BC034565                        | XLOC_013043 |                                                           |                 | -0,771822362 |
| A_23_P58321    | NM_001237                       | CCNA2       | cyclin A2                                                 | ENST00000274026 | -0,772047351 |
| A_21_P0006987  | ENST00000457255                 | XLOC_008777 |                                                           | ENST00000457255 | -0,772299613 |
| A_19_P00320846 | NR_015439                       | LOC550112   | uncharacterized LOC550112                                 |                 | -0,77270172  |
| A_23_P422981   | NM_174899                       | FBXO36      | F-box protein 36                                          | ENST00000283946 | -0,772703703 |
| A_21_P0007740  | BF674433                        | XLOC_010152 |                                                           |                 | -0,772833163 |
| A_23_P214821   | NM_001955                       | EDN1        | endothelin 1                                              | ENST00000379375 | -0,772997015 |
| A_23_P344555   | NM_006403                       | NEDD9       | neural precursor cell expressed, developmentally down-reg | ENST00000448183 | -0,773017638 |
| A_23_P114466   | NM_033284                       | TBL1Y       | transducin (beta)-like 1, Y-linked                        | ENST00000383032 | -0,77307263  |
| A_24_P401645   | NM_001128126                    | AP4S1       | adaptor-related protein complex 4, sigma 1 subunit        | ENST00000542754 | -0,773349845 |
| A_23_P146644   | NM_001002857                    | ANXA2       | annexin A2                                                | ENST00000421017 | -0,773444422 |
| A_23_P104876   | NM_017425                       | SPA17       | sperm autoantigenic protein 17                            | ENST00000524614 | -0,77350714  |
| A_23_P108823   | NM_032523                       | OSBPL6      | oxysterol binding protein-like 6                          | ENST00000315022 | -0,773601411 |

|                |                 |                |                                                              |                 |              |
|----------------|-----------------|----------------|--------------------------------------------------------------|-----------------|--------------|
| A_24_P76649    | NM_198281       | GPRIN3         | GPRIN family member 3                                        | ENST00000333209 | -0,773720742 |
| A_23_P92909    | NM_205841       | SPINK6         | serine peptidase inhibitor, Kazal type 6                     | ENST00000325630 | -0,774201712 |
| A_23_P110791   | NM_005211       | CSF1R          | colony stimulating factor 1 receptor                         | ENST00000286301 | -0,774244486 |
| A_21_P0013470  | NR_027425       | FAM66D         | family with sequence similarity 66, member D                 | ENST00000434078 | -0,774463859 |
| A_24_P294842   | NM_000332       | ATXN1          | ataxin 1                                                     | ENST00000450222 | -0,774522978 |
| A_21_P0012769  | ENST00000506292 | XLOC_I2_011062 |                                                              | ENST00000506292 | -0,774730241 |
| A_19_P00318323 | NR_015410       | LINC00340      | long intergenic non-protein coding RNA 340                   |                 | -0,774767172 |
| A_33_P3236798  | NM_080823       | SRMS           | src-related kinase lacking C-terminal regulatory tyrosine an | ENST00000217188 | -0,774874207 |
| A_23_P122976   | NM_002069       | GNAI1          | guanine nucleotide binding protein (G protein), alpha inhibi | ENST00000351004 | -0,775189966 |
| A_33_P3531979  | AK097496        | LOC283352      | uncharacterized LOC283352                                    |                 | -0,775645836 |
| A_33_P3381313  | NM_001109977    | FAM160A1       | family with sequence similarity 160, member A1               | ENST00000505231 | -0,775683527 |
| A_24_P279489   | NM_001128159    | VPS53          | vacuolar protein sorting 53 homolog (S. cerevisiae)          | ENST00000437048 | -0,776088156 |
| A_23_P258612   | NM_016529       | ATP8A2         | ATPase, aminophospholipid transporter, class I, type 8A, m   | ENST00000544544 | -0,776175005 |
| A_21_P0008595  | TCONS_00023313  | XLOC_011181    |                                                              |                 | -0,776199846 |
| A_23_P117852   | NM_014736       | KIAA0101       | KIAA0101                                                     | ENST00000380258 | -0,776308849 |
| A_33_P3240787  | XR_108893       | LOC100131910   | uncharacterized LOC100131910                                 |                 | -0,776416841 |
| A_23_P256413   | NM_138410       | CMTM7          | CKLF-like MARVEL transmembrane domain containing 7           | ENST00000464689 | -0,776553878 |
| A_19_P00319900 | ENST00000509244 | Q952V6         |                                                              | ENST00000509244 | -0,776688303 |
| A_23_P259611   | NM_016616       | TXNDC3         | thioredoxin domain containing 3 (spermatzoa)                 | ENST00000476435 | -0,77701934  |
| A_23_P71530    | NM_002546       | TNFRSF11B      | tumor necrosis factor receptor superfamily, member 11b       | ENST00000521597 | -0,777733369 |
| A_23_P118834   | NM_001067       | TOP2A          | topoisomerase (DNA) II alpha 170kDa                          | ENST00000269577 | -0,777932676 |
| A_23_P26810    | NM_000546       | TP53           | tumor protein p53                                            | ENST00000396473 | -0,778089533 |
| A_23_P110791   | NM_005211       | CSF1R          | colony stimulating factor 1 receptor                         | ENST00000286301 | -0,778108879 |
| A_23_P50108    | NM_006101       | NDC80          | NDC80 homolog, kinetochore complex component (S. cerev       | ENST00000261597 | -0,778115498 |
| A_19_P00802546 | NM_207318       | FAM199X        |                                                              | ENST00000493442 | -0,778271832 |
| A_23_P104318   | NM_019058       | DDIT4          | DNA-damage-inducible transcript 4                            | ENST00000307365 | -0,77828696  |
| A_23_P351295   | NM_153612       | HS3ST5         | heparan sulfate (glucosamine) 3-O-sulfotransferase 5         | ENST00000312719 | -0,778479163 |
| A_23_P112554   | NM_001855       | COL15A1        | collagen, type XV, alpha 1                                   | ENST00000375001 | -0,778492855 |
| A_21_P0000166  | NM_001205281    | LOC100506012   | serine/threonine-protein phosphatase 5-like                  |                 | -0,778495735 |

|               |                                 |              |                                                             |                 |              |
|---------------|---------------------------------|--------------|-------------------------------------------------------------|-----------------|--------------|
| A_33_P3326767 | XR_110123                       | LOC100129597 | uncharacterized LOC100129597                                |                 | -0,778533371 |
| A_23_P141715  | NM_015476                       | C18orf10     | chromosome 18 open reading frame 10                         | ENST00000334295 | -0,778542289 |
| A_23_P108823  | NM_032523                       | OSBPL6       | oxysterol binding protein-like 6                            | ENST00000315022 | -0,778781599 |
| A_23_P214821  | NM_001955                       | EDN1         | endothelin 1                                                | ENST00000379375 | -0,778838757 |
| A_23_P132644  | NM_020792                       | NCEH1        | neutral cholesterol ester hydrolase 1                       | ENST00000538775 | -0,779119205 |
| A_24_P921321  | NM_002843                       | PTPRJ        | protein tyrosine phosphatase, receptor type, J              | ENST00000278456 | -0,779136466 |
| A_23_P122924  | NM_002192                       | INHBA        | inhibin, beta A                                             | ENST00000442711 | -0,779420382 |
| A_21_P0012398 | TCONS_I2_0001886;XLOC_I2_009888 |              |                                                             |                 | -0,779450161 |
| A_23_P104318  | NM_019058                       | DDIT4        | DNA-damage-inducible transcript 4                           | ENST00000307365 | -0,779527954 |
| A_23_P104438  | NM_032578                       | MYPN         | myopalladin                                                 | ENST00000354393 | -0,779903577 |
| A_23_P122077  | NM_016591                       | GCNT4        | glucosaminyl (N-acetyl) transferase 4, core 2               | ENST00000322348 | -0,780008751 |
| A_23_P48175   | NM_024056                       | TMEM106C     | transmembrane protein 106C                                  | ENST00000449758 | -0,780155805 |
| A_33_P3290343 | NM_000104                       | CYP1B1       | cytochrome P450, family 1, subfamily B, polypeptide 1       | ENST00000407341 | -0,780373842 |
| A_23_P1014    | NR_026761                       | LINC00467    | long intergenic non-protein coding RNA 467                  |                 | -0,780585277 |
| A_23_P361544  | NM_173815                       | CES4A        | carboxylesterase 4A                                         | ENST00000544478 | -0,780717775 |
| A_33_P3230548 | NM_014875                       | KIF14        | kinesin family member 14                                    | ENST00000367350 | -0,780788185 |
| A_23_P138680  | NM_172200                       | IL15RA       | interleukin 15 receptor, alpha                              | ENST00000379972 | -0,780867732 |
| A_23_P110791  | NM_005211                       | CSF1R        | colony stimulating factor 1 receptor                        | ENST00000286301 | -0,781032535 |
| A_23_P133474  | NM_002084                       | GPX3         | glutathione peroxidase 3 (plasma)                           | ENST00000458211 | -0,781186212 |
| A_23_P58321   | NM_001237                       | CCNA2        | cyclin A2                                                   | ENST00000274026 | -0,781277179 |
| A_23_P35219   | NM_002497                       | NEK2         | NIMA (never in mitosis gene a)-related kinase 2             | ENST00000462283 | -0,781347805 |
| A_23_P118246  | NM_016095                       | GINS2        | GINS complex subunit 2 (Psf2 homolog)                       | ENST00000253462 | -0,781384162 |
| A_23_P105465  | NM_004072                       | CMKLR1       | chemokine-like receptor 1                                   | ENST00000550402 | -0,782068292 |
| A_23_P58321   | NM_001237                       | CCNA2        | cyclin A2                                                   | ENST00000274026 | -0,782178538 |
| A_23_P110791  | NM_005211                       | CSF1R        | colony stimulating factor 1 receptor                        | ENST00000286301 | -0,782338868 |
| A_21_P0004271 | ENST00000508366                 | ATP6AP1L     | ATPase, H+ transporting, lysosomal accessory protein 1-like | ENST00000508366 | -0,782889892 |
| A_33_P3361067 | NM_004827                       | ABCG2        | ATP-binding cassette, sub-family G (WHITE), member 2        | ENST00000237612 | -0,783574484 |
| A_23_P1014    | NR_026761                       | LINC00467    | long intergenic non-protein coding RNA 467                  |                 | -0,783668054 |
| A_23_P112452  | NR_003191                       | GGTA1P       | glycoprotein, alpha-galactosyltransferase 1 pseudogene      | ENST00000373793 | -0,78376102  |



|               |                                 |                |                                                    |                 |              |
|---------------|---------------------------------|----------------|----------------------------------------------------|-----------------|--------------|
| A_23_P1331    | NM_080801                       | COL13A1        | collagen, type XIII, alpha 1                       | ENST00000478219 | -0,783904651 |
| A_23_P125082  | NM_002199                       | IRF2           | interferon regulatory factor 2                     | ENST00000393593 | -0,784159758 |
| A_33_P3346663 | NM_004069                       | AP2S1          | adaptor-related protein complex 2, sigma 1 subunit | ENST00000263270 | -0,784895364 |
| A_23_P74359   | NM_004078                       | CSRP1          | cysteine and glycine-rich protein 1                | ENST00000340006 | -0,785413473 |
| A_23_P105862  | NM_023037                       | FRY            | furry homolog (Drosophila)                         | ENST00000380257 | -0,786180394 |
| A_23_P112061  | NM_152419                       | HGSNAT         | heparan-alpha-glucosaminide N-acetyltransferase    | ENST00000458501 | -0,786214508 |
| A_23_P12082   | NM_001025199                    | CHI3L2         | chitinase 3-like 2                                 | ENST00000369748 | -0,78649197  |
| A_23_P110791  | NM_005211                       | CSF1R          | colony stimulating factor 1 receptor               | ENST00000286301 | -0,78663098  |
| A_33_P3409477 | NM_032873                       | UBASH3B        | ubiquitin associated and SH3 domain containing B   | ENST00000284273 | -0,786775868 |
| A_23_P110791  | NM_005211                       | CSF1R          | colony stimulating factor 1 receptor               | ENST00000286301 | -0,787086849 |
| A_24_P111242  | NM_148893                       | SVIP           | small VCP/p97-interacting protein                  | ENST00000354193 | -0,787186186 |
| A_23_P109171  | NM_001195                       | BFSP1          | beaded filament structural protein 1, filensin     | ENST00000536626 | -0,787595931 |
| A_23_P259692  | NM_058179                       | PSAT1          | phosphoserine aminotransferase 1                   | ENST00000376588 | -0,787658417 |
| A_23_P153320  | NM_000201                       | ICAM1          | intercellular adhesion molecule 1                  | ENST00000264832 | -0,787956638 |
| A_23_P112061  | NM_152419                       | HGSNAT         | heparan-alpha-glucosaminide N-acetyltransferase    | ENST00000458501 | -0,788008352 |
| A_23_P58321   | NM_001237                       | CCNA2          | cyclin A2                                          | ENST00000274026 | -0,788315715 |
| A_33_P3614398 | AK096235                        | LOC283516      | uncharacterized LOC283516                          |                 | -0,788362088 |
| A_23_P109171  | NM_001195                       | BFSP1          | beaded filament structural protein 1, filensin     | ENST00000536626 | -0,7885311   |
| A_23_P118834  | NM_001067                       | TOP2A          | topoisomerase (DNA) II alpha 170kDa                | ENST00000269577 | -0,788607052 |
| A_21_P0010853 | TCONS_I2_0000337(XLOC_I2_001841 |                |                                                    |                 | -0,788668634 |
| A_23_P144916  | NM_005110                       | GFPT2          | glutamine-fructose-6-phosphate transaminase 2      | ENST00000253778 | -0,788711933 |
| A_23_P423482  | NM_152450                       | FAM81A         | family with sequence similarity 81, member A       | ENST00000288228 | -0,788740507 |
| A_23_P104876  | NM_017425                       | SPA17          | sperm autoantigenic protein 17                     | ENST00000524614 | -0,788772635 |
| A_23_P123071  | NM_001233                       | CAV2           | caveolin 2                                         | ENST00000498493 | -0,789199444 |
| A_21_P0012056 | ENST00000436187                 | XLOC_I2_007884 |                                                    | ENST00000436187 | -0,78925609  |
| A_21_P0010043 | TCONS_00028408                  | XLOC_013759    |                                                    |                 | -0,78936517  |
| A_24_P489164  | AY358202                        | LOC100131943   | uncharacterized LOC100131943                       |                 | -0,789432168 |
| A_23_P118834  | NM_001067                       | TOP2A          | topoisomerase (DNA) II alpha 170kDa                | ENST00000269577 | -0,789460193 |
| A_24_P304051  | NM_004832                       | GSTO1          | glutathione S-transferase omega 1                  | ENST00000493946 | -0,789634675 |

|               |                  |                |                                                              |                 |              |
|---------------|------------------|----------------|--------------------------------------------------------------|-----------------|--------------|
| A_23_P110791  | NM_005211        | CSF1R          | colony stimulating factor 1 receptor                         | ENST00000286301 | -0,789817976 |
| A_23_P1014    | NR_026761        | LINC00467      | long intergenic non-protein coding RNA 467                   |                 | -0,790259131 |
| A_23_P104318  | NM_019058        | DDIT4          | DNA-damage-inducible transcript 4                            | ENST00000307365 | -0,790402132 |
| A_23_P1014    | NR_026761        | LINC00467      | long intergenic non-protein coding RNA 467                   |                 | -0,79064802  |
| A_23_P1331    | NM_080801        | COL13A1        | collagen, type XIII, alpha 1                                 | ENST00000478219 | -0,790680358 |
| A_23_P105862  | NM_023037        | FRY            | furry homolog (Drosophila)                                   | ENST00000380257 | -0,791027998 |
| A_23_P200396  | NM_019118        | TMEM234        | transmembrane protein 234                                    | ENST00000484490 | -0,791269103 |
| A_21_P0000948 | ENST00000424487  | XLOC_000048    |                                                              | ENST00000424487 | -0,791335657 |
| A_32_P342064  | NM_002032        | FTH1           | ferritin, heavy polypeptide 1                                | ENST00000534180 | -0,791396272 |
| A_24_P940517  | NM_016297        | PCYOX1         | prenylcysteine oxidase 1                                     | ENST00000433351 | -0,791703428 |
| A_23_P33364   | NM_001009555     | SH3D19         | SH3 domain containing 19                                     | ENST00000514152 | -0,791774323 |
| A_23_P12082   | NM_001025199     | CHI3L2         | chitinase 3-like 2                                           | ENST00000369748 | -0,792338132 |
| A_21_P0013038 | TCONS_I2_0002443 | XLOC_I2_012727 |                                                              |                 | -0,792875623 |
| A_33_P3382423 | NM_182498        | ZNF428         | zinc finger protein 428                                      | ENST00000300811 | -0,792906858 |
| A_33_P3345210 | NM_001164407     | TLCD2          | TLC domain containing 2                                      | ENST00000330676 | -0,792998078 |
| A_23_P157865  | NM_002160        | TNC            | tenascin C                                                   | ENST00000350763 | -0,793276905 |
| A_23_P122924  | NM_002192        | INHBA          | inhibin, beta A                                              | ENST00000442711 | -0,793753922 |
| A_21_P0000646 | NR_034148        | LOC283143      | uncharacterized LOC283143                                    |                 | -0,793997458 |
| A_21_P0007956 | ENST00000424165  | XLOC_010466    |                                                              | ENST00000424165 | -0,794064013 |
| A_23_P105562  | NM_000552        | VWF            | von Willebrand factor                                        | ENST00000261405 | -0,79410651  |
| A_23_P140373  | NM_017791        | FLVCR2         | feline leukemia virus subgroup C cellular receptor family, m | ENST00000238667 | -0,794257921 |
| A_21_P0013701 | AK095210         | XLOC_I2_014850 |                                                              |                 | -0,794313297 |
| A_23_P121564  | NM_000857        | GUCY1B3        | guanylate cyclase 1, soluble, beta 3                         | ENST00000264424 | -0,794656538 |
| A_33_P3275510 | NM_152504        | C20orf196      | chromosome 20 open reading frame 196                         | ENST00000303142 | -0,795081301 |
| A_23_P118246  | NM_016095        | GINS2          | GINS complex subunit 2 (Psf2 homolog)                        | ENST00000253462 | -0,795174657 |
| A_23_P254842  | NM_012080        | HDHD1          | haloacid dehalogenase-like hydrolase domain containing 1     | ENST00000544385 | -0,795220058 |
| A_33_P3734384 | AK097526         | LOC285957      | uncharacterized LOC285957                                    |                 | -0,795553018 |
| A_32_P111306  | NR_027072        | LINC00189      | long intergenic non-protein coding RNA 189                   | ENST00000431661 | -0,795700889 |
| A_23_P104318  | NM_019058        | DDIT4          | DNA-damage-inducible transcript 4                            | ENST00000307365 | -0,795799177 |

|               |                 |                |                                                             |                 |              |
|---------------|-----------------|----------------|-------------------------------------------------------------|-----------------|--------------|
| A_24_P323114  | NR_001446       | ANXA2P3        | annexin A2 pseudogene 3                                     |                 | -0,795867377 |
| A_23_P104438  | NM_032578       | MYPN           | myopalladin                                                 | ENST00000354393 | -0,796020258 |
| A_23_P202345  | NM_032804       | ADO            | 2-aminoethanethiol (cysteamine) dioxygenase                 | ENST00000373783 | -0,796497087 |
| A_33_P3278318 | NM_012228       | MSRB2          | methionine sulfoxide reductase B2                           | ENST00000376510 | -0,796535784 |
| A_23_P110941  | NM_001512       | GSTA4          | glutathione S-transferase alpha 4                           | ENST00000370960 | -0,796864053 |
| A_33_P3283430 | NM_025229       | SEL1L2         | sel-1 suppressor of lin-12-like 2 (C. elegans)              | ENST00000423870 | -0,796895917 |
| A_33_P3251776 | NM_001142777    | HSD3B7         | hydroxy-delta-5-steroid dehydrogenase, 3 beta- and steroid  | ENST00000262520 | -0,796916073 |
| A_23_P399078  | NM_000362       | TIMP3          | TIMP metalloproteinase inhibitor 3                          | ENST00000266085 | -0,797149322 |
| A_24_P365526  | NM_002110       | HCK            | hemopoietic cell kinase                                     | ENST00000375862 | -0,797307262 |
| A_21_P0014427 | ENST00000441316 | LOC100506544   |                                                             | ENST00000441316 | -0,797415962 |
| A_24_P206343  | NM_033054       | MYO1G          | myosin IG                                                   | ENST00000488554 | -0,797486891 |
| A_33_P3239405 | NM_016456       | TMEM9          | transmembrane protein 9                                     | ENST00000414605 | -0,797653626 |
| A_24_P82466   | NM_201433       | GAS7           | growth arrest-specific 7                                    | ENST00000323816 | -0,798647996 |
| A_21_P0013796 | NM_002032       | FTH1           | ferritin, heavy polypeptide 1                               | ENST00000534719 | -0,798829453 |
| A_23_P108492  | NM_138395       | MARS2          | methionyl-tRNA synthetase 2, mitochondrial                  | ENST00000499940 | -0,79905311  |
| A_23_P122924  | NM_002192       | INHBA          | inhibin, beta A                                             | ENST00000442711 | -0,799604674 |
| A_24_P365975  | NM_005202       | COL8A2         | collagen, type VIII, alpha 2                                | ENST00000397799 | -0,799642953 |
| A_23_P112452  | NR_003191       | GGTA1P         | glycoprotein, alpha-galactosyltransferase 1 pseudogene      | ENST00000373793 | -0,7997145   |
| A_33_P3331831 | XM_003403663    | DKFZp451A211   | DKFZp451A211 protein                                        |                 | -0,800143334 |
| A_23_P153320  | NM_000201       | ICAM1          | intercellular adhesion molecule 1                           | ENST00000264832 | -0,800365634 |
| A_24_P235429  | NM_005502       | ABCA1          | ATP-binding cassette, sub-family A (ABC1), member 1         | ENST00000374736 | -0,80052514  |
| A_21_P0010998 | THC2636507      | XLOC_I2_002469 |                                                             |                 | -0,80075749  |
| A_23_P110791  | NM_005211       | CSF1R          | colony stimulating factor 1 receptor                        | ENST00000286301 | -0,801184966 |
| A_24_P123119  | NM_001966       | EHHADH         | enoyl-CoA, hydratase/3-hydroxyacyl CoA dehydrogenase        | ENST00000231887 | -0,801265504 |
| A_33_P3217465 | NM_021242       | MID1IP1        | MID1 interacting protein 1 (gastrulation specific G12 homol | ENST00000378474 | -0,801769529 |
| A_23_P105862  | NM_023037       | FRY            | furry homolog (Drosophila)                                  | ENST00000380257 | -0,801834241 |
| A_33_P3360167 | NM_001004731    | OR5AU1         | olfactory receptor, family 5, subfamily AU, member 1        | ENST00000304418 | -0,802211983 |
| A_23_P139704  | NM_001946       | DUSP6          | dual specificity phosphatase 6                              | ENST00000279488 | -0,802221203 |
| A_23_P403991  | NM_024080       | TRPM8          | transient receptor potential cation channel, subfamily M, m | ENST00000324695 | -0,802331787 |

|               |                 |             |                                                                                     |                 |              |
|---------------|-----------------|-------------|-------------------------------------------------------------------------------------|-----------------|--------------|
| A_21_P0004772 | ENST00000452675 | XLOC_005810 |                                                                                     | ENST00000452675 | -0,802657363 |
| A_23_P157404  | NM_001283       | AP1S1       | adaptor-related protein complex 1, sigma 1 subunit                                  | ENST00000337619 | -0,802711533 |
| A_21_P0000647 | NR_034156       | LGALS17A    | Charcot-Leyden crystal protein pseudogene                                           |                 | -0,802734607 |
| A_33_P3289596 | NM_014971       | EFR3B       | EFR3 homolog B ( <i>S. cerevisiae</i> )                                             | ENST00000403714 | -0,802887797 |
| A_23_P412029  | NM_144709       | PUS10       | pseudouridylate synthase 10                                                         |                 | -0,802887874 |
| A_33_P3407985 | NM_001195386    | TMEM99      | transmembrane protein 99                                                            | ENST00000301665 | -0,802993309 |
| A_23_P122924  | NM_002192       | INHBA       | inhibin, beta A                                                                     | ENST00000442711 | -0,803376062 |
| A_23_P319583  | NM_014747       | RIMS3       | regulating synaptic membrane exocytosis 3                                           | ENST00000372684 | -0,803617686 |
| A_24_P158089  | NM_000602       | SERPINE1    | serpin peptidase inhibitor, clade E (nexin, plasminogen activator inhibitor type 1) | ENST00000445463 | -0,803657608 |
| A_23_P153853  | NM_001398       | ECH1        | enoyl CoA hydratase 1, peroxisomal                                                  | ENST00000221418 | -0,803860852 |
| A_33_P3415551 | NM_207328       | GPAT2       | glycerol-3-phosphate acyltransferase 2, mitochondrial                               | ENST00000377137 | -0,80407935  |
| A_32_P204676  | NM_001444       | FABP5       | fatty acid binding protein 5 (psoriasis-associated)                                 | ENST00000486269 | -0,804289303 |
| A_23_P105862  | NM_023037       | FRY         | furry homolog ( <i>Drosophila</i> )                                                 | ENST00000380257 | -0,804327295 |
| A_23_P213375  | NM_018936       | PCDHB2      | protocadherin beta 2                                                                | ENST00000194155 | -0,804426482 |
| A_23_P153320  | NM_000201       | ICAM1       | intercellular adhesion molecule 1                                                   | ENST00000264832 | -0,804788688 |
| A_23_P104318  | NM_019058       | DDIT4       | DNA-damage-inducible transcript 4                                                   | ENST00000307365 | -0,804974989 |
| A_23_P80032   | NM_005225       | E2F1        | E2F transcription factor 1                                                          | ENST00000343380 | -0,805021757 |
| A_33_P3379091 | NM_145731       | SYNGR1      | synaptogyrin 1                                                                      |                 | -0,805401114 |
| A_32_P66881   | NM_138554       | TLR4        | toll-like receptor 4                                                                |                 | -0,805442079 |
| A_23_P113748  | NM_024697       | ZNF385D     | zinc finger protein 385D                                                            | ENST00000494118 | -0,805507789 |
| A_23_P257971  | NM_001353       | AKR1C1      | aldo-keto reductase family 1, member C1 (dihydrodiol dehydrogenase)                 | ENST00000460124 | -0,805602988 |
| A_23_P404091  | NM_152407       | GRPEL2      | GrpE-like 2, mitochondrial ( <i>E. coli</i> )                                       | ENST00000507562 | -0,80562082  |
| A_23_P105862  | NM_023037       | FRY         | furry homolog ( <i>Drosophila</i> )                                                 | ENST00000380257 | -0,805795134 |
| A_23_P118     | NM_001439       | EXTL2       | exostoses (multiple)-like 2                                                         | ENST00000370114 | -0,806039435 |
| A_23_P311144  | NM_144978       | CCDC138     | coiled-coil domain containing 138                                                   | ENST00000409529 | -0,806093301 |
| A_23_P120467  | NM_199427       | ZFP64       | zinc finger protein 64 homolog (mouse)                                              | ENST00000361387 | -0,806159181 |
| A_23_P12363   | NM_005012       | ROR1        | receptor tyrosine kinase-like orphan receptor 1                                     | ENST00000545203 | -0,806358426 |
| A_23_P139600  | NM_004658       | RASAL1      | RAS protein activator like 1 (GAP1 like)                                            | ENST00000446861 | -0,806372784 |
| A_23_P104318  | NM_019058       | DDIT4       | DNA-damage-inducible transcript 4                                                   | ENST00000307365 | -0,80673589  |

|                |                 |                |                                                                |                 |              |
|----------------|-----------------|----------------|----------------------------------------------------------------|-----------------|--------------|
| A_33_P3257903  | NM_001512       | GSTA4          | glutathione S-transferase alpha 4                              | ENST00000370959 | -0,806878941 |
| A_23_P88643    | NM_001005241    | OR4N4          | olfactory receptor, family 4, subfamily N, member 4            | ENST00000328795 | -0,80689689  |
| A_23_P112061   | NM_152419       | HGSNAT         | heparan-alpha-glucosaminide N-acetyltransferase                | ENST00000458501 | -0,807270748 |
| A_23_P139418   | NM_198516       | GALNTL4        | UDP-N-acetyl-alpha-D-galactosamine:polypeptide N-acetylgl      | ENST00000227756 | -0,807431229 |
| A_19_P00317144 | AK096731        | XLOC_005595    | 0                                                              |                 | -0,807646752 |
| A_23_P11201    | NM_001097579    | GPR34          | G protein-coupled receptor 34                                  | ENST00000535368 | -0,807734681 |
| A_23_P40174    | NM_004994       | MMP9           | matrix metalloproteinase 9 (gelatinase B, 92kDa gelatinase, ') | ENST00000545925 | -0,807775272 |
| A_21_P0000688  | NR_037841       | MACROD2-AS1    | MACROD2 antisense RNA 1 (non-protein coding)                   | ENST00000455291 | -0,808102547 |
| A_23_P71530    | NM_002546       | TNFRSF11B      | tumor necrosis factor receptor superfamily, member 11b         | ENST00000521597 | -0,808151318 |
| A_21_P0013767  | BC048131        | LOC550643      | uncharacterized LOC550643                                      |                 | -0,808226182 |
| A_33_P3304382  | NM_152416       | C8orf38        | chromosome 8 open reading frame 38                             | ENST00000396124 | -0,808488393 |
| A_24_P22050    | NM_017817       | RAB20          | RAB20, member RAS oncogene family                              | ENST00000267328 | -0,808708819 |
| A_23_P105862   | NM_023037       | FRY            | furry homolog (Drosophila)                                     | ENST00000380257 | -0,808712722 |
| A_23_P106024   | NM_002226       | JAG2           | jagged 2                                                       | ENST00000546616 | -0,808776704 |
| A_23_P153320   | NM_000201       | ICAM1          | intercellular adhesion molecule 1                              | ENST00000264832 | -0,809278234 |
| A_23_P153320   | NM_000201       | ICAM1          | intercellular adhesion molecule 1                              | ENST00000264832 | -0,809719064 |
| A_21_P0003903  | TCONS_00009149  | XLOC_004134    |                                                                |                 | -0,809726711 |
| A_21_P0011264  | ENST00000554945 | XLOC_I2_004371 |                                                                | ENST00000554945 | -0,809845243 |
| A_33_P3415191  | NM_005603       | ATP8B1         | ATPase, aminophospholipid transporter, class I, type 8B, mε    | ENST00000536015 | -0,809860408 |
| A_23_P302672   | BC013592        | DDIT4L         | DNA-damage-inducible transcript 4-like                         |                 | -0,809998771 |
| A_23_P122924   | NM_002192       | INHBA          | inhibin, beta A                                                | ENST00000442711 | -0,810104701 |
| A_33_P3347281  | NM_001024075    | HNMT           | histamine N-methyltransferase                                  | ENST00000329366 | -0,8101074   |
| A_23_P40174    | NM_004994       | MMP9           | matrix metalloproteinase 9 (gelatinase B, 92kDa gelatinase, ') | ENST00000545925 | -0,810656673 |
| A_33_P3412613  | NM_001032283    | TMPO           | thymopoietin                                                   | ENST00000393053 | -0,810929255 |
| A_23_P26810    | NM_000546       | TP53           | tumor protein p53                                              | ENST00000396473 | -0,811764447 |
| A_23_P122924   | NM_002192       | INHBA          | inhibin, beta A                                                | ENST00000442711 | -0,812029753 |
| A_23_P40174    | NM_004994       | MMP9           | matrix metalloproteinase 9 (gelatinase B, 92kDa gelatinase, ') | ENST00000545925 | -0,812130278 |
| A_24_P152968   | NM_001353       | AKR1C1         | aldo-keto reductase family 1, member C1 (dihydrodiol dehy      | ENST00000434459 | -0,812690371 |
| A_19_P00315518 | ENST00000427157 | XLOC_005810    |                                                                | ENST00000427157 | -0,813358172 |



|                |                                 |              |                                                                              |              |
|----------------|---------------------------------|--------------|------------------------------------------------------------------------------|--------------|
| A_23_P40174    | NM_004994                       | MMP9         | matrix metalloproteinase 9 (gelatinase B, 92kDa gelatinase, 'ENST00000545925 | -0,814031657 |
| A_21_P0012633  | TCONS_I2_0002089(XLOC_I2_010947 |              |                                                                              | -0,814045528 |
| A_23_P44244    | NM_003069                       | SMARCA1      | SWI/SNF related, matrix associated, actin dependent regula                   | -0,814275738 |
| A_23_P122924   | NM_002192                       | INHBA        | inhibin, beta A                                                              | -0,814319731 |
| A_21_P0003118  | TCONS_00006511                  | XLOC_003125  |                                                                              | -0,814369146 |
| A_24_P388433   | NM_002718                       | PPP2R3A      | protein phosphatase 2, regulatory subunit B", alpha                          | -0,814416152 |
| A_33_P3354322  | NM_201397                       | GPX1         | glutathione peroxidase 1                                                     | -0,814589298 |
| A_19_P00316135 | NR_027252                       | CYP1B1-AS1   |                                                                              | -0,815092259 |
| A_23_P153320   | NM_000201                       | ICAM1        | intercellular adhesion molecule 1                                            | -0,815101592 |
| A_23_P34307    | NM_005482                       | PIGK         | phosphatidylinositol glycan anchor biosynthesis, class K                     | -0,815201102 |
| A_23_P11201    | NM_001097579                    | GPR34        | G protein-coupled receptor 34                                                | -0,815623412 |
| A_32_P117354   | NM_014988                       | LIMCH1       | LIM and calponin homology domains 1                                          | -0,815783932 |
| A_23_P11644    | NM_006945                       | SPRR2D       | small proline-rich protein 2D                                                | -0,815841935 |
| A_33_P3617190  | AK124119                        | LOC651337    | uncharacterized LOC651337                                                    | -0,815894031 |
| A_23_P122924   | NM_002192                       | INHBA        | inhibin, beta A                                                              | -0,815903156 |
| A_33_P3272921  | NM_005224                       | ARID3A       | AT rich interactive domain 3A (BRIGHT-like)                                  | -0,815952131 |
| A_23_P40174    | NM_004994                       | MMP9         | matrix metalloproteinase 9 (gelatinase B, 92kDa gelatinase, 'ENST00000545925 | -0,816230145 |
| A_23_P153320   | NM_000201                       | ICAM1        | intercellular adhesion molecule 1                                            | -0,816330724 |
| A_23_P1331     | NM_080801                       | COL13A1      | collagen, type XIII, alpha 1                                                 | -0,816432916 |
| A_23_P148327   | NM_005183                       | CACNA1F      | calcium channel, voltage-dependent, L type, alpha 1F subur                   | -0,817424805 |
| A_33_P3210099  | NM_020778                       | ALPK3        | alpha-kinase 3                                                               | -0,817468533 |
| A_24_P106357   | NM_139281                       | WDR36        | WD repeat domain 36                                                          | -0,817682416 |
| A_33_P3299416  | NM_181711                       | GRASP        | GRP1 (general receptor for phosphoinositides 1)-associated                   | -0,817953757 |
| A_21_P0003571  | TCONS_00007983                  | XLOC_003453  |                                                                              | -0,818252862 |
| A_23_P133123   | NM_032117                       | MND1         | meiotic nuclear divisions 1 homolog (S. cerevisiae)                          | -0,818526641 |
| A_21_P0007489  | XR_110328                       | LOC100507616 | uncharacterized LOC100507616                                                 | -0,819026512 |
| A_21_P0009332  | TCONS_00025695                  | XLOC_012515  |                                                                              | -0,819040368 |
| A_23_P45234    | NM_153380                       | ZNF41        | zinc finger protein 41                                                       | -0,819384462 |
| A_23_P118834   | NM_001067                       | TOP2A        | topoisomerase (DNA) II alpha 170kDa                                          | -0,819526023 |

|               |                 |              |                                                                                  |                 |              |
|---------------|-----------------|--------------|----------------------------------------------------------------------------------|-----------------|--------------|
| A_21_P0000869 | NR_039975       | LOC100506229 | uncharacterized LOC100506229                                                     |                 | -0,820185979 |
| A_21_P0007201 | ENST00000533358 | HSD17B12     | hydroxysteroid (17-beta) dehydrogenase 12                                        | ENST00000533358 | -0,820310531 |
| A_24_P220454  | NM_181552       | CUX1         | cut-like homeobox 1                                                              | ENST00000360264 | -0,820399671 |
| A_23_P435407  | NM_001448       | GPC4         | glypican 4                                                                       | ENST00000536418 | -0,820664133 |
| A_33_P3570218 | NR_038990       | LOC339926    | uncharacterized LOC339926                                                        | ENST00000417720 | -0,820799297 |
| A_24_P314571  | AK075287        | SPC24        | SPC24, NDC80 kinetochore complex component, homolog (S. cerevisiae)              |                 | -0,820947232 |
| A_23_P212423  | NM_005108       | XYLB         | xylulokinase homolog (H. influenzae)                                             | ENST00000207870 | -0,82105282  |
| A_21_P0007666 | TCONS_00020644  | XLOC_009944  |                                                                                  |                 | -0,821117083 |
| A_23_P71530   | NM_002546       | TNFRSF11B    | tumor necrosis factor receptor superfamily, member 11b                           | ENST00000521597 | -0,821142959 |
| A_24_P250922  | NM_000963       | PTGS2        | prostaglandin-endoperoxide synthase 2 (prostaglandin G/H                         | ENST00000490885 | -0,821345227 |
| A_21_P0008704 | TCONS_00023572  | XLOC_011396  |                                                                                  |                 | -0,821348631 |
| A_23_P214821  | NM_001955       | EDN1         | endothelin 1                                                                     | ENST00000379375 | -0,821417557 |
| A_23_P40174   | NM_004994       | MMP9         | matrix metalloproteinase 9 (gelatinase B, 92kDa gelatinase,                      | ENST00000545925 | -0,821594079 |
| A_23_P40174   | NM_004994       | MMP9         | matrix metalloproteinase 9 (gelatinase B, 92kDa gelatinase,                      | ENST00000545925 | -0,822051364 |
| A_24_P257579  | NM_022140       | EPB41L4A     | erythrocyte membrane protein band 4.1 like 4A                                    | ENST00000515047 | -0,822189245 |
| A_23_P153320  | NM_000201       | ICAM1        | intercellular adhesion molecule 1                                                | ENST00000264832 | -0,822200131 |
| A_23_P142075  | NM_001611       | ACP5         | acid phosphatase 5, tartrate resistant                                           | ENST00000218758 | -0,822451942 |
| A_23_P40174   | NM_004994       | MMP9         | matrix metalloproteinase 9 (gelatinase B, 92kDa gelatinase,                      | ENST00000545925 | -0,822569677 |
| A_23_P256956  | NM_005733       | KIF20A       | kinesin family member 20A                                                        | ENST00000502338 | -0,82314386  |
| A_32_P128391  | NR_038842       | LOC728431    | uncharacterized LOC728431                                                        | ENST00000424989 | -0,82323097  |
| A_23_P1014    | NR_026761       | LINC00467    | long intergenic non-protein coding RNA 467                                       |                 | -0,823233548 |
| A_23_P133956  | NM_002263       | KIFC1        | kinesin family member C1                                                         | ENST00000480346 | -0,824582587 |
| A_23_P26954   | NM_006373       | VAT1         | vesicle amine transport protein 1 homolog (T. californica)                       | ENST00000542468 | -0,82464037  |
| A_24_P250922  | NM_000963       | PTGS2        | prostaglandin-endoperoxide synthase 2 (prostaglandin G/H                         | ENST00000490885 | -0,824732244 |
| A_23_P153320  | NM_000201       | ICAM1        | intercellular adhesion molecule 1                                                | ENST00000264832 | -0,824738911 |
| A_24_P565556  | NM_019109       | ALG1         | asparagine-linked glycosylation 1, beta-1,4-mannosyltransferase homolog (S. cere |                 | -0,825218291 |
| A_32_P43812   | NM_001040402    | DCUN1D4      | DCN1, defective in cullin neddylation 1, domain containing                       | ENST00000477560 | -0,825668068 |
| A_33_P3271755 | NM_031244       | SIRT5        | sirtuin 5                                                                        | ENST00000379250 | -0,825909722 |
| A_23_P65230   | NM_032813       | TMTC4        | transmembrane and tetratricopeptide repeat containing 4                          | ENST00000342624 | -0,825999828 |

|               |                |                |                                                                              |              |
|---------------|----------------|----------------|------------------------------------------------------------------------------|--------------|
| A_23_P40174   | NM_004994      | MMP9           | matrix metalloproteinase 9 (gelatinase B, 92kDa gelatinase, 'ENST00000545925 | -0,82622372  |
| A_23_P167599  | NM_001034850   | FAM134B        | family with sequence similarity 134, member B                                | -0,826249462 |
| A_23_P122924  | NM_002192      | INHBA          | inhibin, beta A                                                              | -0,826399035 |
| A_23_P73837   | NM_138636      | TLR8           | toll-like receptor 8                                                         | -0,826495008 |
| A_23_P16523   | NM_004864      | GDF15          | growth differentiation factor 15                                             | -0,826701928 |
| A_33_P3247042 | NM_002030      | FPR3           | formyl peptide receptor 3                                                    | -0,826826609 |
| A_23_P108823  | NM_032523      | OSBPL6         | oxysterol binding protein-like 6                                             | -0,82688409  |
| A_23_P112061  | NM_152419      | HGSNAT         | heparan-alpha-glucosaminide N-acetyltransferase                              | -0,826998598 |
| A_23_P61487   | NM_018205      | LRRC20         | leucine rich repeat containing 20                                            | -0,827026435 |
| A_24_P305570  | NM_018993      | RIN2           | Ras and Rab interactor 2                                                     | -0,827214293 |
| A_24_P253818  | NM_004475      | FLOT2          | flotillin 2                                                                  | -0,827789085 |
| A_33_P3409099 | NM_000332      | ATXN1          | ataxin 1                                                                     | -0,827974337 |
| A_23_P139500  | NM_030762      | BHLHE41        | basic helix-loop-helix family, member e41                                    | -0,828206618 |
| A_23_P118834  | NM_001067      | TOP2A          | topoisomerase (DNA) II alpha 170kDa                                          | -0,828311627 |
| A_23_P40174   | NM_004994      | MMP9           | matrix metalloproteinase 9 (gelatinase B, 92kDa gelatinase, 'ENST00000545925 | -0,828648087 |
| A_24_P58337   | NM_002032      | FTH1           | ferritin, heavy polypeptide 1                                                | -0,828796841 |
| A_24_P250922  | NM_000963      | PTGS2          | prostaglandin-endoperoxide synthase 2 (prostaglandin G/H ENST00000490885     | -0,829033928 |
| A_23_P165136  | NM_145256      | LRRC25         | leucine rich repeat containing 25                                            | -0,82915863  |
| A_23_P101871  | NM_024907      | FBXO17         | F-box protein 17                                                             | -0,82918725  |
| A_23_P8961    | NM_000880      | IL7            | interleukin 7                                                                | -0,829194636 |
| A_23_P112554  | NM_001855      | COL15A1        | collagen, type XV, alpha 1                                                   | -0,82941838  |
| A_33_P3298810 | NM_005304      | FFAR3          | free fatty acid receptor 3                                                   | -0,829955719 |
| A_21_P0004268 | TCONS_00010003 | XLOC_004439    |                                                                              | -0,830238185 |
| A_24_P250922  | NM_000963      | PTGS2          | prostaglandin-endoperoxide synthase 2 (prostaglandin G/H ENST00000490885     | -0,830251259 |
| A_32_P405759  | NM_152888      | COL22A1        | collagen, type XXII, alpha 1                                                 | -0,830437036 |
| A_23_P127288  | NM_000417      | IL2RA          | interleukin 2 receptor, alpha                                                | -0,830620919 |
| A_23_P112452  | NR_003191      | GGTA1P         | glycoprotein, alpha-galactosyltransferase 1 pseudogene                       | -0,831667723 |
| A_21_P0012097 | AK023515       | XLOC_I2_008343 |                                                                              | -0,83194738  |
| A_23_P203540  | NM_012153      | EHF            | ets homologous factor                                                        | -0,831956008 |

|               |                 |             |                                                              |                 |              |
|---------------|-----------------|-------------|--------------------------------------------------------------|-----------------|--------------|
| A_23_P253692  | NM_001079858    | GPR64       | G protein-coupled receptor 64                                | ENST00000356606 | -0,831997984 |
| A_23_P333218  | NM_001031711    | ERGIC1      | endoplasmic reticulum-golgi intermediate compartment (ER     | ENST00000523215 | -0,832432371 |
| A_24_P12397   | NM_018965       | TREM2       | triggering receptor expressed on myeloid cells 2             | ENST00000373122 | -0,83258037  |
| A_23_P200138  | NM_020125       | SLAMF8      | SLAM family member 8                                         | ENST00000289707 | -0,832684743 |
| A_23_P19657   | NM_032832       | LRP11       | low density lipoprotein receptor-related protein 11          | ENST00000239367 | -0,83302776  |
| A_23_P151075  | NM_001175       | ARHGDI3     | Rho GDP dissociation inhibitor (GDI) beta                    | ENST00000228945 | -0,83303186  |
| A_24_P411749  | NM_020455       | GPR126      | G protein-coupled receptor 126                               | ENST00000367609 | -0,833088999 |
| A_24_P250922  | NM_000963       | PTGS2       | prostaglandin-endoperoxide synthase 2 (prostaglandin G/H     | ENST00000490885 | -0,833239281 |
| A_23_P71530   | NM_002546       | TNFRSF11B   | tumor necrosis factor receptor superfamily, member 11b       | ENST00000521597 | -0,833409008 |
| A_23_P109171  | NM_001195       | BFSP1       | beaded filament structural protein 1, filensin               | ENST00000536626 | -0,833509586 |
| A_23_P352266  | NM_000633       | BCL2        | B-cell CLL/lymphoma 2                                        | ENST00000398117 | -0,833514548 |
| A_23_P316150  | NM_020800       | IFT80       | intraflagellar transport 80 homolog (Chlamydomonas)          | ENST00000326448 | -0,833757411 |
| A_21_P0000727 | NR_038216       | LOC154092   | uncharacterized LOC154092                                    | ENST00000456749 | -0,834003604 |
| A_33_P3215883 | NM_002019       | FLT1        | fms-related tyrosine kinase 1 (vascular endothelial growth f | ENST00000282397 | -0,834257115 |
| A_33_P3231447 | NM_000210       | ITGA6       | integrin, alpha 6                                            | ENST00000409532 | -0,834281367 |
| A_32_P180958  | NM_016297       | PCYOX1      | prenylcysteine oxidase 1                                     | ENST00000433351 | -0,834744405 |
| A_23_P379475  | NM_014762       | DHCR24      | 24-dehydrocholesterol reductase                              | ENST00000371269 | -0,835441734 |
| A_23_P153320  | NM_000201       | ICAM1       | intercellular adhesion molecule 1                            | ENST00000264832 | -0,835638868 |
| A_33_P3221313 | NM_006733       | CENPI       | centromere protein I                                         | ENST00000423383 | -0,835725104 |
| A_23_P121564  | NM_000857       | GUCY1B3     | guanylate cyclase 1, soluble, beta 3                         | ENST00000264424 | -0,836380117 |
| A_23_P130182  | NM_004217       | AURKB       | aurora kinase B                                              | ENST00000534871 | -0,836452917 |
| A_33_P3294237 | NM_005955       | MTF1        | metal-regulatory transcription factor 1                      |                 | -0,836467862 |
| A_33_P3238415 | NM_001080554    | GSG1        | germ cell associated 1                                       | ENST00000405543 | -0,836655131 |
| A_33_P3334443 | NM_001252271    | FAM69A      | family with sequence similarity 69, member A                 | ENST00000370310 | -0,836695773 |
| A_24_P57700   | NM_015035       | ZHX3        | zinc fingers and homeoboxes 3                                | ENST00000540170 | -0,836978258 |
| A_33_P3240532 | NM_015149       | RGL1        | ral guanine nucleotide dissociation stimulator-like 1        | ENST00000367531 | -0,837047727 |
| A_24_P105391  | NM_001017922    | ERMAP       | erythroblast membrane-associated protein (Scianna blood §    | ENST00000372517 | -0,837524068 |
| A_33_P3258346 | NM_017523       | XAF1        | XIAP associated factor 1                                     | ENST00000361842 | -0,837719856 |
| A_21_P0005817 | ENST00000523946 | XLOC_007052 |                                                              | ENST00000523946 | -0,837761025 |

|                |                |              |                                                              |                 |              |
|----------------|----------------|--------------|--------------------------------------------------------------|-----------------|--------------|
| A_24_P57730    | NM_181304      | MRPL52       | mitochondrial ribosomal protein L52                          | ENST00000355151 | -0,83840003  |
| A_33_P3253394  | NM_002287      | LAIR1        | leukocyte-associated immunoglobulin-like receptor 1          |                 | -0,838467649 |
| A_33_P3288700  | NM_058190      | FAM207A      | family with sequence similarity 207, member A                | ENST00000291634 | -0,838899827 |
| A_33_P3281795  | NM_007283      | MGLL         | monoglyceride lipase                                         | ENST00000265052 | -0,839104817 |
| A_23_P134454   | NM_001753      | CAV1         | caveolin 1, caveolae protein, 22kDa                          | ENST00000341049 | -0,839511223 |
| A_33_P3366195  | NM_014862      | ARNT2        | aryl-hydrocarbon receptor nuclear translocator 2             | ENST00000360062 | -0,839723447 |
| A_21_P0009262  | TCONS_00025441 | XLOC_012259  |                                                              |                 | -0,840073368 |
| A_23_P46871    | NM_018344      | SLC29A3      | solute carrier family 29 (nucleoside transporters), member 3 | ENST00000373189 | -0,840516607 |
| A_23_P122924   | NM_002192      | INHBA        | inhibin, beta A                                              | ENST00000442711 | -0,840565872 |
| A_33_P3333810  | NM_003350      | UBE2V2       | ubiquitin-conjugating enzyme E2 variant 2                    | ENST00000523111 | -0,840592611 |
| A_33_P3385957  | NM_012263      | TTL1         | tubulin tyrosine ligase-like family, member 1                | ENST00000440761 | -0,840649496 |
| A_23_P105862   | NM_023037      | FRY          | furry homolog (Drosophila)                                   | ENST00000380257 | -0,840756217 |
| A_23_P119102   | NM_003370      | VASP         | vasodilator-stimulated phosphoprotein                        | ENST00000245932 | -0,841615396 |
| A_23_P121657   | NM_005114      | HS3ST1       | heparan sulfate (glucosamine) 3-O-sulfotransferase 1         | ENST00000002596 | -0,841922266 |
| A_23_P300600   | NM_021076      | NEFH         | neurofilament, heavy polypeptide                             | ENST00000310624 | -0,842952244 |
| A_24_P250922   | NM_000963      | PTGS2        | prostaglandin-endoperoxide synthase 2 (prostaglandin G/H     | ENST00000490885 | -0,843057797 |
| A_23_P1331     | NM_080801      | COL13A1      | collagen, type XIII, alpha 1                                 | ENST00000478219 | -0,843441618 |
| A_24_P257971   | NM_005094      | SLC27A4      | solute carrier family 27 (fatty acid transporter), member 4  | ENST00000372870 | -0,844079162 |
| A_23_P155351   | NM_000060      | BTD          | biotinidase                                                  | ENST00000383778 | -0,844092613 |
| A_21_P0000769  | NR_038332      | LOC100505622 | uncharacterized LOC100505622                                 |                 | -0,844181197 |
| A_33_P3383326  | NM_057159      | LPAR1        | lysophosphatidic acid receptor 1                             | ENST00000374430 | -0,844718693 |
| A_23_P329261   | NM_000891      | KCNJ2        | potassium inwardly-rectifying channel, subfamily J, member 2 | ENST00000243457 | -0,844749099 |
| A_23_P210425   | NM_181526      | MYL9         | myosin, light chain 9, regulatory                            | ENST00000279022 | -0,844760694 |
| A_23_P129209   | NM_002168      | IDH2         | isocitrate dehydrogenase 2 (NADP+), mitochondrial            | ENST00000540499 | -0,845766617 |
| A_23_P207742   | NM_003250      | THRA         | thyroid hormone receptor, alpha                              | ENST00000394121 | -0,846302403 |
| A_23_P10458    | NM_018280      | C22orf26     | chromosome 22 open reading frame 26                          | ENST00000333761 | -0,846884753 |
| A_23_P112554   | NM_001855      | COL15A1      | collagen, type XV, alpha 1                                   | ENST00000375001 | -0,846962508 |
| A_21_P0007639  | TCONS_00020585 | XLOC_009899  |                                                              |                 | -0,846980188 |
| A_19_P00315804 | NR_015375      | FLJ35024     | uncharacterized LOC401491                                    |                 | -0,847019974 |



|               |                                 |              |                                                                                       |                 |              |
|---------------|---------------------------------|--------------|---------------------------------------------------------------------------------------|-----------------|--------------|
| A_23_P89431   | NM_002982                       | CCL2         | chemokine (C-C motif) ligand 2                                                        | ENST00000225831 | -0,847465354 |
| A_24_P342807  | NM_017964                       | SLC30A6      | solute carrier family 30 (zinc transporter), member 6                                 | ENST00000435660 | -0,847697248 |
| A_23_P126593  | NM_005620                       | S100A11      | S100 calcium binding protein A11                                                      | ENST00000271638 | -0,847712359 |
| A_33_P3399263 | NM_001243539                    | IL15RA       | interleukin 15 receptor, alpha                                                        | ENST00000379972 | -0,847732814 |
| A_32_P206949  | NM_198276                       | TMEM17       | transmembrane protein 17                                                              | ENST00000494919 | -0,847825741 |
| A_23_P256956  | NM_005733                       | KIF20A       | kinesin family member 20A                                                             | ENST00000502338 | -0,847986382 |
| A_21_P0000731 | NR_038236                       | LOC100507632 | uncharacterized LOC100507632                                                          | ENST00000499425 | -0,848391795 |
| A_24_P379512  | NM_005482                       | PIGK         | phosphatidylinositol glycan anchor biosynthesis, class K                              | ENST00000370812 | -0,848641275 |
| A_21_P0006774 | ENST00000421256                 | XLOC_008867  |                                                                                       | ENST00000421256 | -0,84888554  |
| A_23_P140563  | NM_001040655                    | TTC23        | tetratricopeptide repeat domain 23                                                    | ENST00000494567 | -0,84908528  |
| A_23_P391637  | NM_020705                       | TBC1D24      | TBC1 domain family, member 24                                                         | ENST00000293970 | -0,849444755 |
| A_23_P46936   | NM_000399                       | EGR2         | early growth response 2                                                               | ENST00000411732 | -0,849597342 |
| A_23_P89431   | NM_002982                       | CCL2         | chemokine (C-C motif) ligand 2                                                        | ENST00000225831 | -0,849684862 |
| A_23_P218770  | NM_002872                       | RAC2         | ras-related C3 botulinum toxin substrate 2 (rho family, small GTP-binding protein)    | ENST00000249071 | -0,849740737 |
| A_24_P31929   | NM_000950                       | PRRG1        | proline rich Gla (G-carboxyglutamic acid) 1                                           | ENST00000449135 | -0,850051317 |
| A_23_P145096  | NM_005084                       | PLA2G7       | phospholipase A2, group VII (platelet-activating factor acetylhydrolase IIc)          | ENST00000537365 | -0,850189217 |
| A_21_P0013034 | TCONS_I2_0002437(XLOC_I2_012678 |              |                                                                                       |                 | -0,850266455 |
| A_23_P103617  | NM_003568                       | ANXA9        | annexin A9                                                                            | ENST00000368947 | -0,850396426 |
| A_23_P89431   | NM_002982                       | CCL2         | chemokine (C-C motif) ligand 2                                                        | ENST00000225831 | -0,850540555 |
| A_24_P250922  | NM_000963                       | PTGS2        | prostaglandin-endoperoxide synthase 2 (prostaglandin G/H synthase and cyclooxygenase) | ENST00000490885 | -0,851897732 |
| A_24_P131066  | NM_004258                       | CD101        | CD101 molecule                                                                        | ENST00000369470 | -0,852106768 |
| A_23_P352266  | NM_000633                       | BCL2         | B-cell CLL/lymphoma 2                                                                 | ENST00000398117 | -0,852150461 |
| A_23_P209625  | NM_000104                       | CYP1B1       | cytochrome P450, family 1, subfamily B, polypeptide 1                                 | ENST00000260630 | -0,852631015 |
| A_23_P104876  | NM_017425                       | SPA17        | sperm autoantigenic protein 17                                                        | ENST00000524614 | -0,852981694 |
| A_33_P3233906 | NM_005855                       | RAMP1        | receptor (G protein-coupled) activity modifying protein 1                             | ENST00000254661 | -0,85341431  |
| A_21_P0003110 | THC2659360                      | XLOC_003077  |                                                                                       |                 | -0,853577119 |
| A_33_P3282489 | NM_001097634                    | GCNT1        | glucosaminyl (N-acetyl) transferase 1, core 2                                         | ENST00000442371 | -0,853630548 |
| A_24_P557479  | NM_017523                       | XAF1         | XIAP associated factor 1                                                              | ENST00000361842 | -0,853665508 |
| A_21_P0010773 | NR_033856                       | FLJ43315     | asparagine synthetase pseudogene                                                      | ENST00000416367 | -0,853792341 |

|                |                 |             |                                                          |                 |              |
|----------------|-----------------|-------------|----------------------------------------------------------|-----------------|--------------|
| A_23_P352266   | NM_000633       | BCL2        | B-cell CLL/lymphoma 2                                    | ENST00000398117 | -0,853883609 |
| A_19_P00317169 | NR_024393       | LOC727677   | uncharacterized LOC727677                                |                 | -0,854101502 |
| A_21_P0007223  | ENST00000535746 | XLOC_009181 |                                                          | ENST00000535746 | -0,854151032 |
| A_24_P926960   | NM_001409       | MEGF6       | multiple EGF-like-domains 6                              |                 | -0,854420213 |
| A_24_P405205   | NM_001001396    | ATP2B4      | ATPase, Ca <sup>++</sup> transporting, plasma membrane 4 | ENST00000367218 | -0,854514261 |
| A_24_P250922   | NM_000963       | PTGS2       | prostaglandin-endoperoxide synthase 2 (prostaglandin G/H | ENST00000490885 | -0,854835679 |
| A_23_P89431    | NM_002982       | CCL2        | chemokine (C-C motif) ligand 2                           | ENST00000225831 | -0,854889723 |
| A_23_P119102   | NM_003370       | VASP        | vasodilator-stimulated phosphoprotein                    | ENST00000245932 | -0,854939237 |
| A_23_P121657   | NM_005114       | HS3ST1      | heparan sulfate (glucosamine) 3-O-sulfotransferase 1     | ENST00000002596 | -0,854992269 |
| A_33_P3282566  | NM_017728       | TMEM104     | transmembrane protein 104                                | ENST00000335464 | -0,856177433 |
| A_23_P71598    | NM_003829       | MPDZ        | multiple PDZ domain protein                              | ENST00000319198 | -0,857094671 |
| A_33_P3309984  | NM_000221       | KHK         | ketohexokinase (fructokinase)                            | ENST00000260599 | -0,857253932 |
| A_23_P106844   | NM_005953       | MT2A        | metallothionein 2A                                       | ENST00000245185 | -0,857425411 |
| A_33_P3232692  | NM_001185156    | IL24        | interleukin 24                                           | ENST00000294984 | -0,857699843 |
| A_33_P3421913  | NM_014333       | CADM1       | cell adhesion molecule 1                                 |                 | -0,857957046 |
| A_23_P119102   | NM_003370       | VASP        | vasodilator-stimulated phosphoprotein                    | ENST00000245932 | -0,858313571 |
| A_23_P126735   | NM_000572       | IL10        | interleukin 10                                           | ENST00000423557 | -0,858377306 |
| A_23_P89431    | NM_002982       | CCL2        | chemokine (C-C motif) ligand 2                           | ENST00000225831 | -0,858521835 |
| A_23_P112554   | NM_001855       | COL15A1     | collagen, type XV, alpha 1                               | ENST00000375001 | -0,858646366 |
| A_23_P106973   | NM_006640       | Sep-09      | septin 9                                                 | ENST00000329047 | -0,858839368 |
| A_23_P206920   | NM_001040114    | MYH11       | myosin, heavy chain 11, smooth muscle                    | ENST00000396324 | -0,859351303 |
| A_23_P119102   | NM_003370       | VASP        | vasodilator-stimulated phosphoprotein                    | ENST00000245932 | -0,859354064 |
| A_33_P3610406  | NR_028501       | ECEL1P2     | endothelin converting enzyme-like 1, pseudogene 2        | ENST00000461596 | -0,86000424  |
| A_23_P89431    | NM_002982       | CCL2        | chemokine (C-C motif) ligand 2                           | ENST00000225831 | -0,860134259 |
| A_33_P3376116  | NM_182513       | SPC24       | SPC24, NDC80 kinetochore complex component, homolog (    | ENST00000423327 | -0,860364813 |
| A_33_P3350583  | NM_138819       | FAM122C     | family with sequence similarity 122C                     | ENST00000370784 | -0,861300349 |
| A_23_P121564   | NM_000857       | GUCY1B3     | guanylate cyclase 1, soluble, beta 3                     | ENST00000264424 | -0,861946695 |
| A_23_P89431    | NM_002982       | CCL2        | chemokine (C-C motif) ligand 2                           | ENST00000225831 | -0,862171646 |
| A_33_P3235975  | NM_032343       | CHCHD6      | coiled-coil-helix-coiled-coil-helix domain containing 6  | ENST00000514908 | -0,862196576 |

|               |                  |                |                                                           |                 |              |
|---------------|------------------|----------------|-----------------------------------------------------------|-----------------|--------------|
| A_23_P104438  | NM_032578        | MYPN           | myopalladin                                               | ENST00000354393 | -0,862201305 |
| A_23_P313828  | NM_181716        | CENPV          | centromere protein V                                      | ENST00000299736 | -0,862691239 |
| A_32_P147078  | NM_021097        | SLC8A1         | solute carrier family 8 (sodium/calcium exchanger), membe | ENST00000542640 | -0,862844158 |
| A_23_P106405  | NM_002487        | NDN            | necdin homolog (mouse)                                    | ENST00000331837 | -0,863191863 |
| A_33_P3294836 | NM_024573        | C6orf211       | chromosome 6 open reading frame 211                       | ENST00000494826 | -0,863240749 |
| A_21_P0007403 | NR_034148        | LOC283143      | uncharacterized LOC283143                                 |                 | -0,86330071  |
| A_21_P0013036 | TCONS_I2_0002442 | XLOC_I2_012724 |                                                           |                 | -0,863363661 |
| A_23_P105465  | NM_004072        | CMKLR1         | chemokine-like receptor 1                                 | ENST00000550402 | -0,86341301  |
| A_32_P137939  | NM_001101        | ACTB           | actin, beta                                               | ENST00000462494 | -0,863841209 |
| A_23_P120467  | NM_199427        | ZFP64          | zinc finger protein 64 homolog (mouse)                    | ENST00000361387 | -0,863925092 |
| A_21_P0014706 | XR_112271        | LOC100508751   | uncharacterized LOC100508751                              |                 | -0,863963769 |
| A_23_P111583  | NM_001001547     | CD36           | CD36 molecule (thrombospondin receptor)                   | ENST00000419819 | -0,864202908 |
| A_24_P250922  | NM_000963        | PTGS2          | prostaglandin-endoperoxide synthase 2 (prostaglandin G/H  | ENST00000490885 | -0,864490855 |
| A_23_P151405  | NM_018204        | CKAP2          | cytoskeleton associated protein 2                         | ENST00000258607 | -0,864587246 |
| A_21_P0014186 | XR_108747        | LOC100506130   | uncharacterized LOC100506130                              |                 | -0,864812459 |
| A_33_P3370094 | NM_007289        | MME            | membrane metallo-endopeptidase                            | ENST00000360490 | -0,865126871 |
| A_33_P3672756 | XR_112106        | LOC284561      | uncharacterized LOC284561                                 |                 | -0,865254907 |
| A_24_P250922  | NM_000963        | PTGS2          | prostaglandin-endoperoxide synthase 2 (prostaglandin G/H  | ENST00000490885 | -0,865742901 |
| A_24_P97836   | NM_002873        | RAD17          | RAD17 homolog (S. pombe)                                  | ENST00000380774 | -0,865970896 |
| A_33_P3328360 | NR_027033        | MIRLET7BHG     | MIRLET7B host gene (non-protein coding)                   | ENST00000360737 | -0,866209008 |
| A_23_P89431   | NM_002982        | CCL2           | chemokine (C-C motif) ligand 2                            | ENST00000225831 | -0,866278564 |
| A_23_P352266  | NM_000633        | BCL2           | B-cell CLL/lymphoma 2                                     | ENST00000398117 | -0,866425912 |
| A_24_P64344   | NM_013314        | BLNK           | B-cell linker                                             | ENST00000393898 | -0,866429753 |
| A_23_P59877   | NM_001444        | FABP5          | fatty acid binding protein 5 (psoriasis-associated)       | ENST00000458175 | -0,866538894 |
| A_23_P103864  | NM_024525        | TTC13          | tetratricopeptide repeat domain 13                        | ENST00000414259 | -0,866587452 |
| A_33_P3423445 | ENST00000327867  | ZNF730         | zinc finger protein 730                                   | ENST00000327867 | -0,866963895 |
| A_23_P119102  | NM_003370        | VASP           | vasodilator-stimulated phosphoprotein                     | ENST00000245932 | -0,867022771 |
| A_33_P3222917 | NM_001024736     | CD276          | CD276 molecule                                            | ENST00000318443 | -0,867440828 |
| A_23_P89431   | NM_002982        | CCL2           | chemokine (C-C motif) ligand 2                            | ENST00000225831 | -0,868536395 |

|                |                |              |                                                                             |                 |              |
|----------------|----------------|--------------|-----------------------------------------------------------------------------|-----------------|--------------|
| A_33_P3266674  | NM_025224      | ZBTB46       | zinc finger and BTB domain containing 46                                    | ENST00000302995 | -0,86962598  |
| A_33_P3367301  | NM_152219      | GJD3         | gap junction protein, delta 3, 31.9kDa                                      |                 | -0,869718725 |
| A_33_P3291484  | NM_005668      | ST8SIA4      | ST8 alpha-N-acetyl-neuraminide alpha-2,8-sialyltransferase 4                |                 | -0,869999852 |
| A_33_P3230254  | NM_022346      | NCAPG        | non-SMC condensin I complex, subunit G                                      | ENST00000251496 | -0,870060301 |
| A_24_P673063   | NM_001444      | FABP5        | fatty acid binding protein 5 (psoriasis-associated)                         | ENST00000477993 | -0,870434446 |
| A_23_P123853   | NM_006274      | CCL19        | chemokine (C-C motif) ligand 19                                             | ENST00000485502 | -0,870591142 |
| A_23_P112846   | NM_001144978   | MTHFD2L      | methylenetetrahydrofolate dehydrogenase (NADP+ dependant)                   | ENST00000492183 | -0,871196012 |
| A_33_P3212615  | NM_006287      | TFPI         | tissue factor pathway inhibitor (lipoprotein-associated coagulation factor) | ENST00000233156 | -0,871668148 |
| A_24_P188447   | NM_021952      | ELAVL4       | ELAV (embryonic lethal, abnormal vision, Drosophila)-like 4                 | ENST00000357083 | -0,871946428 |
| A_23_P85903    | NM_003268      | TLR5         | toll-like receptor 5                                                        | ENST00000342210 | -0,872065259 |
| A_23_P106973   | NM_006640      | Sep-09       | septin 9                                                                    | ENST00000329047 | -0,872189998 |
| A_23_P122976   | NM_002069      | GNAI1        | guanine nucleotide binding protein (G protein), alpha inhibitory 1          | ENST00000351004 | -0,872218609 |
| A_23_P111583   | NM_001001547   | CD36         | CD36 molecule (thrombospondin receptor)                                     | ENST00000419819 | -0,872224857 |
| A_23_P11201    | NM_001097579   | GPR34        | G protein-coupled receptor 34                                               | ENST00000535368 | -0,872430235 |
| A_23_P111583   | NM_001001547   | CD36         | CD36 molecule (thrombospondin receptor)                                     | ENST00000419819 | -0,872520203 |
| A_24_P323598   | NM_001017420   | ESCO2        | establishment of cohesion 1 homolog 2 (S. cerevisiae)                       | ENST00000305188 | -0,873105669 |
| A_23_P106973   | NM_006640      | Sep-09       | septin 9                                                                    | ENST00000329047 | -0,873172691 |
| A_19_P00317277 | AK055877       | LOC100506328 | uncharacterized LOC100506328                                                |                 | -0,873190319 |
| A_21_P0001355  | TCONS_00001080 | XLOC_000318  |                                                                             |                 | -0,873432057 |
| A_23_P118834   | NM_001067      | TOP2A        | topoisomerase (DNA) II alpha 170kDa                                         | ENST00000269577 | -0,873857748 |
| A_23_P111583   | NM_001001547   | CD36         | CD36 molecule (thrombospondin receptor)                                     | ENST00000419819 | -0,874010647 |
| A_23_P106973   | NM_006640      | Sep-09       | septin 9                                                                    | ENST00000329047 | -0,874461674 |
| A_23_P89431    | NM_002982      | CCL2         | chemokine (C-C motif) ligand 2                                              | ENST00000225831 | -0,87491084  |
| A_23_P111583   | NM_001001547   | CD36         | CD36 molecule (thrombospondin receptor)                                     | ENST00000419819 | -0,87492344  |
| A_23_P2814     | NM_005905      | SMAD9        | SMAD family member 9                                                        | ENST00000379826 | -0,875002075 |
| A_23_P119102   | NM_003370      | VASP         | vasodilator-stimulated phosphoprotein                                       | ENST00000245932 | -0,87508113  |
| A_23_P58266    | NM_005980      | S100P        | S100 calcium binding protein P                                              | ENST00000296370 | -0,8755026   |
| A_33_P3309556  | NM_006504      | PTPRE        | protein tyrosine phosphatase, receptor type, E                              |                 | -0,875639507 |
| A_23_P119778   | NM_020342      | SLC39A10     | solute carrier family 39 (zinc transporter), member 10                      | ENST00000409086 | -0,875761094 |

|               |                 |              |                                               |                 |              |
|---------------|-----------------|--------------|-----------------------------------------------|-----------------|--------------|
| A_23_P106973  | NM_006640       | Sep-09       | septin 9                                      | ENST00000329047 | -0,875786659 |
| A_24_P926783  | NM_001145434    | ZNF880       | zinc finger protein 880                       | ENST00000422689 | -0,876630369 |
| A_23_P87257   | NM_022061       | MRPL17       | mitochondrial ribosomal protein L17           | ENST00000529958 | -0,87697323  |
| A_21_P0014444 | XR_109837       | LOC100507639 | uncharacterized LOC100507639                  |                 | -0,87711868  |
| A_33_P3307197 | NM_020440       | PTGFRN       | prostaglandin F2 receptor negative regulator  | ENST00000544471 | -0,877178245 |
| A_24_P408457  | NM_000262       | NAGA         | N-acetylgalactosaminidase, alpha-             | ENST00000396398 | -0,877272895 |
| A_23_P111583  | NM_001001547    | CD36         | CD36 molecule (thrombospondin receptor)       | ENST00000419819 | -0,877692318 |
| A_23_P202219  | NM_015916       | CALHM2       | calcium homeostasis modulator 2               | ENST00000260743 | -0,877769077 |
| A_23_P137984  | NM_002966       | S100A10      | S100 calcium binding protein A10              | ENST00000368809 | -0,877789328 |
| A_24_P257478  | NM_198721       | COL25A1      | collagen, type XXV, alpha 1                   | ENST00000443653 | -0,877886014 |
| A_24_P230563  | NM_000417       | IL2RA        | interleukin 2 receptor, alpha                 | ENST00000447847 | -0,878194866 |
| A_23_P347169  | NM_001001924    | MTUS1        | microtubule associated tumor suppressor 1     | ENST00000262102 | -0,878794327 |
| A_21_P0005962 | ENST00000523946 | XLOC_007052  |                                               | ENST00000523946 | -0,878978595 |
| A_23_P106973  | NM_006640       | Sep-09       | septin 9                                      | ENST00000329047 | -0,879088334 |
| A_21_P0008080 | ENST00000428761 | XLOC_010423  |                                               | ENST00000428761 | -0,879282418 |
| A_23_P118246  | NM_016095       | GINS2        | GINS complex subunit 2 (Psf2 homolog)         | ENST00000253462 | -0,879355107 |
| A_23_P106973  | NM_006640       | Sep-09       | septin 9                                      | ENST00000329047 | -0,8798555   |
| A_23_P126735  | NM_000572       | IL10         | interleukin 10                                | ENST00000423557 | -0,880400029 |
| A_21_P0003840 | TCONS_00008860  | XLOC_003629  |                                               |                 | -0,880949827 |
| A_23_P501435  | NM_020536       | CSRP2BP      | CSRP2 binding protein                         | ENST00000278816 | -0,881363967 |
| A_23_P108823  | NM_032523       | OSBPL6       | oxysterol binding protein-like 6              | ENST00000315022 | -0,881373231 |
| A_21_P0000818 | NR_038847       | LOC100505576 | uncharacterized LOC100505576                  |                 | -0,881424976 |
| A_21_P0007799 | TCONS_00020993  | XLOC_010257  |                                               |                 | -0,882121717 |
| A_33_P3212109 | NM_016356       | DCDC2        | doublecortin domain containing 2              | ENST00000378450 | -0,882227948 |
| A_21_P0005162 | AK055022        | XLOC_005681  |                                               |                 | -0,882273835 |
| A_23_P118834  | NM_001067       | TOP2A        | topoisomerase (DNA) II alpha 170kDa           | ENST00000269577 | -0,882833942 |
| A_33_P3277988 | NM_000629       | IFNAR1       | interferon (alpha, beta and omega) receptor 1 | ENST00000270139 | -0,883280225 |
| A_23_P3177    | NM_022054       | KCNK13       | potassium channel, subfamily K, member 13     | ENST00000282146 | -0,883470892 |
| A_23_P106973  | NM_006640       | Sep-09       | septin 9                                      | ENST00000329047 | -0,883828693 |



|                |                 |                |                                                              |                 |              |
|----------------|-----------------|----------------|--------------------------------------------------------------|-----------------|--------------|
| A_33_P3268567  | NM_003581       | NCK2           | NCK adaptor protein 2                                        | ENST00000393349 | -0,883889172 |
| A_19_P00812190 | THC2520127      | Q5D1D6         |                                                              |                 | -0,884731853 |
| A_23_P111583   | NM_001001547    | CD36           | CD36 molecule (thrombospondin receptor)                      | ENST00000419819 | -0,884901974 |
| A_24_P96403    | NM_001001890    | RUNX1          | runt-related transcription factor 1                          | ENST00000344691 | -0,885020242 |
| A_23_P205584   | NM_016475       | JKAMP          | JNK1/MAPK8-associated membrane protein                       |                 | -0,885127767 |
| A_23_P106973   | NM_006640       | Sep-09         | septin 9                                                     | ENST00000329047 | -0,885215231 |
| A_23_P94030    | NM_002291       | LAMB1          | laminin, beta 1                                              | ENST00000222399 | -0,885280705 |
| A_23_P12363    | NM_005012       | ROR1           | receptor tyrosine kinase-like orphan receptor 1              | ENST00000545203 | -0,885336596 |
| A_23_P105862   | NM_023037       | FRY            | furry homolog (Drosophila)                                   | ENST00000380257 | -0,885484165 |
| A_21_P0009754  | TCONS_00027265  | XLOC_013282    |                                                              |                 | -0,885782779 |
| A_23_P106973   | NM_006640       | Sep-09         | septin 9                                                     | ENST00000329047 | -0,885912096 |
| A_23_P155711   | NM_018248       | NEIL3          | nei endonuclease VIII-like 3 (E. coli)                       | ENST00000264596 | -0,88636174  |
| A_23_P41487    | NM_015130       | TBC1D9         | TBC1 domain family, member 9 (with GRAM domain)              | ENST00000442267 | -0,886671241 |
| A_23_P119102   | NM_003370       | VASP           | vasodilator-stimulated phosphoprotein                        | ENST00000245932 | -0,886773709 |
| A_23_P304682   | NM_001424       | EMP2           | epithelial membrane protein 2                                | ENST00000359543 | -0,887011289 |
| A_23_P105465   | NM_004072       | CMKLR1         | chemokine-like receptor 1                                    | ENST00000550402 | -0,887140095 |
| A_21_P0014461  | XR_109940       | LOC100506934   | uncharacterized LOC100506934                                 |                 | -0,887577708 |
| A_33_P3407289  | NR_027436       | LOC283788      | FSHD region gene 1 pseudogene                                | ENST00000418749 | -0,887628064 |
| A_32_P71571    | NM_182522       | FAM19A4        | family with sequence similarity 19 (chemokine (C-C motif)-li | ENST00000295569 | -0,887857045 |
| A_23_P352266   | NM_000633       | BCL2           | B-cell CLL/lymphoma 2                                        | ENST00000398117 | -0,888023462 |
| A_23_P358917   | NM_000765       | CYP3A7         | cytochrome P450, family 3, subfamily A, polypeptide 7        | ENST00000336374 | -0,888126921 |
| A_21_P0005277  | ENST00000465755 | XLOC_006325    |                                                              | ENST00000465755 | -0,888304927 |
| A_21_P0007962  | NR_034119       | LINC00460      | long intergenic non-protein coding RNA 460                   | ENST00000439790 | -0,888558129 |
| A_23_P12082    | NM_001025199    | CHI3L2         | chitinase 3-like 2                                           | ENST00000369748 | -0,888590082 |
| A_23_P126735   | NM_000572       | IL10           | interleukin 10                                               | ENST00000423557 | -0,8886365   |
| A_21_P0013462  | ENST00000418309 | XLOC_l2_014077 |                                                              | ENST00000418309 | -0,88929358  |
| A_23_P250564   | NM_005400       | PRKCE          | protein kinase C, epsilon                                    | ENST00000306156 | -0,889624176 |
| A_21_P0000653  | NR_036485       | LOC283104      | uncharacterized LOC283104                                    |                 | -0,889628106 |
| A_23_P204158   | NM_032814       | RNFT2          | ring finger protein, transmembrane 2                         | ENST00000547718 | -0,889757347 |

|               |                  |                |                                                              |                 |              |
|---------------|------------------|----------------|--------------------------------------------------------------|-----------------|--------------|
| A_23_P111583  | NM_001001547     | CD36           | CD36 molecule (thrombospondin receptor)                      | ENST00000419819 | -0,890390876 |
| A_23_P316410  | NM_007052        | NOX1           | NADPH oxidase 1                                              | ENST00000372961 | -0,891157672 |
| A_21_P0012241 | TCONS_I2_0001755 | XLOC_I2_009281 |                                                              |                 | -0,892064712 |
| A_23_P12554   | NM_016112        | PKD2L1         | polycystic kidney disease 2-like 1                           | ENST00000318222 | -0,892105264 |
| A_24_P245815  | NM_020437        | ASPHD2         | aspartate beta-hydroxylase domain containing 2               | ENST00000215906 | -0,892431924 |
| A_23_P62659   | NM_000310        | PPT1           | palmitoyl-protein thioesterase 1                             | ENST00000433473 | -0,892549223 |
| A_24_P151582  | NM_003216        | TEF            | thyrotrophic embryonic factor                                | ENST00000266304 | -0,89260021  |
| A_24_P80204   | NM_005434        | MALL           | mal, T-cell differentiation protein-like                     | ENST00000272462 | -0,892647659 |
| A_23_P67042   | NM_017947        | MOCOS          | molybdenum cofactor sulfurase                                | ENST00000261326 | -0,892856178 |
| A_23_P119102  | NM_003370        | VASP           | vasodilator-stimulated phosphoprotein                        | ENST00000245932 | -0,893728139 |
| A_33_P3376971 | NM_024111        | CHAC1          | ChaC, cation transport regulator homolog 1 (E. coli)         | ENST00000446533 | -0,893776625 |
| A_23_P404162  | NM_014707        | HDAC9          | histone deacetylase 9                                        | ENST00000405010 | -0,893871025 |
| A_24_P276576  | NM_032738        | FCRLA          | Fc receptor-like A                                           | ENST00000367950 | -0,894408122 |
| A_24_P414376  | NM_016531        | KLF3           | Kruppel-like factor 3 (basic)                                | ENST00000261438 | -0,894585535 |
| A_23_P104876  | NM_017425        | SPA17          | sperm autoantigenic protein 17                               | ENST00000524614 | -0,894796508 |
| A_23_P110212  | NM_001995        | ACSL1          | acyl-CoA synthetase long-chain family member 1               | ENST00000281455 | -0,894892888 |
| A_23_P110212  | NM_001995        | ACSL1          | acyl-CoA synthetase long-chain family member 1               | ENST00000281455 | -0,896382629 |
| A_23_P27400   | NM_001523        | HAS1           | hyaluronan synthase 1                                        | ENST00000540069 | -0,897354132 |
| A_23_P126735  | NM_000572        | IL10           | interleukin 10                                               | ENST00000423557 | -0,897616364 |
| A_23_P110212  | NM_001995        | ACSL1          | acyl-CoA synthetase long-chain family member 1               | ENST00000281455 | -0,898576368 |
| A_23_P256956  | NM_005733        | KIF20A         | kinesin family member 20A                                    | ENST00000502338 | -0,898926777 |
| A_23_P256956  | NM_005733        | KIF20A         | kinesin family member 20A                                    | ENST00000502338 | -0,898940807 |
| A_21_P0004090 | ENST00000509745  | XLOC_004711    |                                                              | ENST00000509745 | -0,898986967 |
| A_23_P55998   | NM_005628        | SLC1A5         | solute carrier family 1 (neutral amino acid transporter), me | ENST00000306894 | -0,899207713 |
| A_23_P126649  | NM_024554        | PGBD5          | piggyBac transposable element derived 5                      | ENST00000321327 | -0,899280526 |
| A_33_P3392892 | NM_017886        | ULK4           | unc-51-like kinase 4 (C. elegans)                            | ENST00000301831 | -0,899556944 |
| A_24_P943815  | NM_004650        | PNPLA4         | patatin-like phospholipase domain containing 4               | ENST00000444736 | -0,899790487 |
| A_33_P3381147 | NM_001012708     | KRTAP5-3       | keratin associated protein 5-3                               | ENST00000399685 | -0,899849554 |
| A_21_P0001164 | ENST00000415166  | XLOC_000955    |                                                              | ENST00000415166 | -0,901459131 |

|               |                 |             |                                                         |                 |              |
|---------------|-----------------|-------------|---------------------------------------------------------|-----------------|--------------|
| A_24_P79617   | NM_014656       | KIAA0040    | KIAA0040                                                |                 | -0,902415787 |
| A_23_P32805   | NM_017551       | GRID1       | glutamate receptor, ionotropic, delta 1                 | ENST00000464741 | -0,902721046 |
| A_23_P111583  | NM_001001547    | CD36        | CD36 molecule (thrombospondin receptor)                 | ENST00000419819 | -0,902871133 |
| A_24_P70183   | NM_001040113    | MYH11       | myosin, heavy chain 11, smooth muscle                   | ENST00000452625 | -0,904172309 |
| A_23_P110212  | NM_001995       | ACSL1       | acyl-CoA synthetase long-chain family member 1          | ENST00000281455 | -0,904887462 |
| A_23_P110212  | NM_001995       | ACSL1       | acyl-CoA synthetase long-chain family member 1          | ENST00000281455 | -0,905588903 |
| A_32_P59010   | NM_207381       | TNFAIP8L3   | tumor necrosis factor, alpha-induced protein 8-like 3   | ENST00000327536 | -0,90582238  |
| A_23_P119102  | NM_003370       | VASP        | vasodilator-stimulated phosphoprotein                   | ENST00000245932 | -0,906074721 |
| A_21_P0007136 | AK307308        | XLOC_009562 |                                                         |                 | -0,906558221 |
| A_23_P111583  | NM_001001547    | CD36        | CD36 molecule (thrombospondin receptor)                 | ENST00000419819 | -0,906832592 |
| A_24_P788878  | NM_001007595    | C2CD4B      | C2 calcium-dependent domain containing 4B               | ENST00000380392 | -0,906992856 |
| A_23_P104438  | NM_032578       | MYPN        | myopalladin                                             | ENST00000354393 | -0,907228588 |
| A_21_P0014257 | ENST00000368619 | STK32C      | serine/threonine kinase 32C                             | ENST00000368619 | -0,907745454 |
| A_24_P115199  | NM_001037165    | FOXK1       | forkhead box K1                                         | ENST00000328914 | -0,907856032 |
| A_23_P404494  | NM_002185       | IL7R        | interleukin 7 receptor                                  | ENST00000343305 | -0,90871665  |
| A_23_P118834  | NM_001067       | TOP2A       | topoisomerase (DNA) II alpha 170kDa                     | ENST00000269577 | -0,909078148 |
| A_23_P119102  | NM_003370       | VASP        | vasodilator-stimulated phosphoprotein                   | ENST00000245932 | -0,909378621 |
| A_24_P277657  | NM_006877       | GMPR        | guanosine monophosphate reductase                       | ENST00000540478 | -0,909400785 |
| A_24_P197964  | NM_014788       | TRIM14      | tripartite motif containing 14                          | ENST00000341469 | -0,909497996 |
| A_33_P3565787 | NR_027329       | KIAA1908    | uncharacterized LOC114796                               |                 | -0,909608459 |
| A_33_P3276918 | NM_001195228    | FAM64A      | family with sequence similarity 64, member A            | ENST00000250056 | -0,909819838 |
| A_24_P176493  | NM_015251       | ATMIN       | ATM interactor                                          | ENST00000299575 | -0,910561118 |
| A_23_P30666   | NM_014452       | TNFRSF21    | tumor necrosis factor receptor superfamily, member 21   | ENST00000419206 | -0,910643942 |
| A_24_P267522  | NM_152655       | ZNF585A     | zinc finger protein 585A                                | ENST00000292841 | -0,910732417 |
| A_24_P920521  | NM_203497       | COMMD6      | COMM domain containing 6                                | ENST00000377615 | -0,910933347 |
| A_33_P3306159 | NM_001080495    | TNRC18      | trinucleotide repeat containing 18                      | ENST00000430969 | -0,911071357 |
| A_23_P105691  | NM_018654       | GPRC5D      | G protein-coupled receptor, family C, group 5, member D | ENST00000396333 | -0,911782587 |
| A_23_P110212  | NM_001995       | ACSL1       | acyl-CoA synthetase long-chain family member 1          | ENST00000281455 | -0,912312734 |
| A_23_P300076  | NM_032263       | IQCG        | IQ motif containing G                                   | ENST00000490748 | -0,912494004 |

|                |                 |              |                                                      |                 |              |
|----------------|-----------------|--------------|------------------------------------------------------|-----------------|--------------|
| A_33_P3390017  | NM_207445       | C15orf54     | chromosome 15 open reading frame 54                  | ENST00000318578 | -0,913024098 |
| A_23_P110212   | NM_001995       | ACSL1        | acyl-CoA synthetase long-chain family member 1       | ENST00000281455 | -0,913423254 |
| A_24_P21266    | NM_001003790    | ERLIN2       | ER lipid raft associated 2                           | ENST00000397228 | -0,914149799 |
| A_23_P345220   | NM_014631       | SH3PXD2A     | SH3 and PX domains 2A                                | ENST00000315994 | -0,91428823  |
| A_23_P110212   | NM_001995       | ACSL1        | acyl-CoA synthetase long-chain family member 1       | ENST00000281455 | -0,914330748 |
| A_23_P46039    | NM_032738       | FCRLA        | Fc receptor-like A                                   | ENST00000236938 | -0,914386897 |
| A_24_P18146    | NM_015310       | PSD3         | pleckstrin and Sec7 domain containing 3              | ENST00000286485 | -0,914847007 |
| A_23_P209735   | NM_025139       | ARMC9        | armadillo repeat containing 9                        | ENST00000349938 | -0,915002006 |
| A_23_P256956   | NM_005733       | KIF20A       | kinesin family member 20A                            | ENST00000502338 | -0,915764077 |
| A_24_P199655   | NM_138959       | VANGL1       | vang-like 1 (van gogh, Drosophila)                   | ENST00000310260 | -0,916084437 |
| A_23_P104876   | NM_017425       | SPA17        | sperm autoantigenic protein 17                       | ENST00000524614 | -0,916948535 |
| A_23_P110212   | NM_001995       | ACSL1        | acyl-CoA synthetase long-chain family member 1       | ENST00000281455 | -0,917313376 |
| A_23_P10182    | NM_003500       | ACOX2        | acyl-CoA oxidase 2, branched chain                   | ENST00000460921 | -0,917533428 |
| A_23_P16953    | NM_000867       | HTR2B        | 5-hydroxytryptamine (serotonin) receptor 2B          | ENST00000540289 | -0,917725362 |
| A_19_P00317412 | NR_038842       | LOC728431    | uncharacterized LOC728431                            | ENST00000424989 | -0,917748759 |
| A_23_P104438   | NM_032578       | MYPN         | myopalladin                                          | ENST00000354393 | -0,917841792 |
| A_33_P3232960  | NM_001010870    | TDRD6        | tudor domain containing 6                            | ENST00000544460 | -0,917898133 |
| A_32_P91042    | NR_027406       | LOC100129034 | uncharacterized LOC100129034                         |                 | -0,918069915 |
| A_19_P00802257 | NR_038842       | LOC728431    | uncharacterized LOC728431                            | ENST00000424989 | -0,918230758 |
| A_33_P3372099  | NM_145244       | DDIT4L       | DNA-damage-inducible transcript 4-like               | ENST00000273990 | -0,918637646 |
| A_23_P406782   | NM_182983       | HPN          | hepsin                                               | ENST00000541345 | -0,919868696 |
| A_33_P3691916  | NM_014883       | FAM13A       | family with sequence similarity 13, member A         | ENST00000264344 | -0,919955001 |
| A_33_P3319925  | ENST00000449753 | IRG1         | immunoresponsive 1 homolog (mouse)                   | ENST00000449753 | -0,920094908 |
| A_33_P3260451  | NM_201402       | USP17L2      | ubiquitin specific peptidase 17-like 2               | ENST00000333796 | -0,922051774 |
| A_21_P0008301  | TCONS_00022436  | XLOC_010773  |                                                      |                 | -0,922394423 |
| A_23_P93431    | NM_016108       | AIG1         | androgen-induced 1                                   | ENST00000357847 | -0,923249162 |
| A_23_P70794    | NM_016277       | RAB23        | RAB23, member RAS oncogene family                    | ENST00000317483 | -0,92408065  |
| A_33_P3623118  | AK054653        | LOC153577    | uncharacterized LOC153577                            |                 | -0,9241091   |
| A_23_P121657   | NM_005114       | HS3ST1       | heparan sulfate (glucosamine) 3-O-sulfotransferase 1 | ENST00000002596 | -0,924122622 |

|                |                 |              |                                                                 |                 |              |
|----------------|-----------------|--------------|-----------------------------------------------------------------|-----------------|--------------|
| A_21_P0009825  | ENST00000449270 | XLOC_013457  |                                                                 | ENST00000449270 | -0,924220391 |
| A_23_P110212   | NM_001995       | ACSL1        | acyl-CoA synthetase long-chain family member 1                  | ENST00000281455 | -0,92511983  |
| A_23_P207879   | NM_024110       | CARD14       | caspase recruitment domain family, member 14                    | ENST00000344227 | -0,925179251 |
| A_23_P151368   | NM_174928       | N6AMT2       | N-6 adenine-specific DNA methyltransferase 2 (putative)         | ENST00000382754 | -0,925356344 |
| A_23_P126735   | NM_000572       | IL10         | interleukin 10                                                  | ENST00000423557 | -0,925869635 |
| A_19_P00813544 | ENST00000556684 | XLOC_010897  | 0                                                               | ENST00000556684 | -0,925952827 |
| A_23_P10182    | NM_003500       | ACOX2        | acyl-CoA oxidase 2, branched chain                              | ENST00000460921 | -0,926430466 |
| A_23_P118834   | NM_001067       | TOP2A        | topoisomerase (DNA) II alpha 170kDa                             | ENST00000269577 | -0,926564945 |
| A_24_P106794   | NM_032869       | NUDCD1       | NudC domain containing 1                                        | ENST00000239690 | -0,927916997 |
| A_32_P60065    | NM_004101       | F2RL2        | coagulation factor II (thrombin) receptor-like 2                | ENST00000296641 | -0,928060976 |
| A_23_P83200    | NM_152572       | AK8          | adenylate kinase 8                                              | ENST00000467161 | -0,928296481 |
| A_23_P112026   | NM_002164       | IDO1         | indoleamine 2,3-dioxygenase 1                                   | ENST00000523779 | -0,928540792 |
| A_33_P3321697  | NM_022140       | EPB41L4A     | erythrocyte membrane protein band 4.1 like 4A                   | ENST00000261486 | -0,928638413 |
| A_23_P35456    | NM_014631       | SH3PXD2A     | SH3 and PX domains 2A                                           | ENST00000355946 | -0,928784767 |
| A_33_P3249589  | NM_022893       | BCL11A       | B-cell CLL/lymphoma 11A (zinc finger protein)                   | ENST00000358510 | -0,928852555 |
| A_23_P113701   | NM_002607       | PDGFA        | platelet-derived growth factor alpha polypeptide                | ENST00000402802 | -0,929117842 |
| A_23_P147918   | NM_080388       | S100A16      | S100 calcium binding protein A16                                | ENST00000368703 | -0,92918939  |
| A_23_P153562   | NM_001736       | C5AR1        | complement component 5a receptor 1                              | ENST00000355085 | -0,929576154 |
| A_24_P350759   | NM_004171       | SLC1A2       | solute carrier family 1 (glial high affinity glutamate transpor | ENST00000278379 | -0,92974848  |
| A_23_P120467   | NM_199427       | ZFP64        | zinc finger protein 64 homolog (mouse)                          | ENST00000361387 | -0,929808211 |
| A_23_P167030   | NM_000316       | PTH1R        | parathyroid hormone 1 receptor                                  | ENST00000427125 | -0,929824665 |
| A_33_P3315263  | NM_175834       | KRT79        | keratin 79                                                      | ENST00000330553 | -0,930605108 |
| A_24_P71904    | NM_000860       | HPGD         | hydroxyprostaglandin dehydrogenase 15-(NAD)                     | ENST00000296522 | -0,931215332 |
| A_21_P0014715  | XR_112556       | LOC100505668 | uncharacterized LOC100505668                                    | ENST00000462559 | -0,931216672 |
| A_23_P163697   | NM_016524       | SYT17        | synaptotagmin XVII                                              | ENST00000355377 | -0,931360959 |
| A_23_P121657   | NM_005114       | HS3ST1       | heparan sulfate (glucosamine) 3-O-sulfotransferase 1            | ENST00000002596 | -0,931597911 |
| A_24_P33156    | NM_001010982    | AFMID        | arylformamidase                                                 | ENST00000473128 | -0,932814379 |
| A_33_P3332362  | NM_001207026    | POU2F2       | POU class 2 homeobox 2                                          | ENST00000342301 | -0,932943206 |
| A_33_P3376965  | NM_024111       | CHAC1        | ChaC, cation transport regulator homolog 1 (E. coli)            | ENST00000487220 | -0,933490821 |



|               |                 |                |                                                            |                 |              |
|---------------|-----------------|----------------|------------------------------------------------------------|-----------------|--------------|
| A_23_P33154   | NM_014393       | STAU2          | stauflen, RNA binding protein, homolog 2 (Drosophila)      | ENST00000355780 | -0,934533986 |
| A_23_P203376  | NM_152852       | MS4A6A         | membrane-spanning 4-domains, subfamily A, member 6A        | ENST00000323961 | -0,934771229 |
| A_23_P256956  | NM_005733       | KIF20A         | kinesin family member 20A                                  | ENST00000502338 | -0,936774019 |
| A_21_P0013600 | ENST00000455981 | XLOC_I2_015033 |                                                            | ENST00000455981 | -0,937800979 |
| A_23_P352266  | NM_000633       | BCL2           | B-cell CLL/lymphoma 2                                      | ENST00000398117 | -0,938278123 |
| A_23_P201747  | NM_007365       | PADI2          | peptidyl arginine deiminase, type II                       | ENST00000375486 | -0,938558016 |
| A_23_P112554  | NM_001855       | COL15A1        | collagen, type XV, alpha 1                                 | ENST00000375001 | -0,939755016 |
| A_23_P121564  | NM_000857       | GUCY1B3        | guanylate cyclase 1, soluble, beta 3                       | ENST00000264424 | -0,939899731 |
| A_23_P103617  | NM_003568       | ANXA9          | annexin A9                                                 | ENST00000368947 | -0,940929876 |
| A_23_P112026  | NM_002164       | IDO1           | indoleamine 2,3-dioxygenase 1                              | ENST00000523779 | -0,941439139 |
| A_23_P10062   | NM_013244       | MGAT4C         | mannosyl (alpha-1,3-)-glycoprotein beta-1,4-N-acetylglucos | ENST00000548651 | -0,941455231 |
| A_23_P105465  | NM_004072       | CMKLR1         | chemokine-like receptor 1                                  | ENST00000550402 | -0,941614852 |
| A_23_P112026  | NM_002164       | IDO1           | indoleamine 2,3-dioxygenase 1                              | ENST00000523779 | -0,942237515 |
| A_23_P121657  | NM_005114       | HS3ST1         | heparan sulfate (glucosamine) 3-O-sulfotransferase 1       | ENST00000002596 | -0,943016302 |
| A_23_P126735  | NM_000572       | IL10           | interleukin 10                                             | ENST00000423557 | -0,943169578 |
| A_23_P60146   | NM_006207       | PDGFRL         | platelet-derived growth factor receptor-like               | ENST00000251630 | -0,944246047 |
| A_23_P12733   | NM_018649       | H2AFY2         | H2A histone family, member Y2                              | ENST00000373255 | -0,945048576 |
| A_23_P112026  | NM_002164       | IDO1           | indoleamine 2,3-dioxygenase 1                              | ENST00000523779 | -0,945086388 |
| A_23_P145694  | NM_001673       | ASNS           | asparagine synthetase (glutamine-hydrolyzing)              | ENST00000394308 | -0,94512406  |
| A_23_P112026  | NM_002164       | IDO1           | indoleamine 2,3-dioxygenase 1                              | ENST00000523779 | -0,94545044  |
| A_33_P3344477 | NM_001134999    | FERMT2         | fermitin family member 2                                   | ENST00000343279 | -0,946050298 |
| A_24_P362540  | NM_003887       | ASAP2          | ArfGAP with SH3 domain, ankyrin repeat and PH domain 2     | ENST00000484590 | -0,946053012 |
| A_23_P114934  | NM_032858       | MAEL           | maelstrom homolog (Drosophila)                             | ENST00000367870 | -0,947084144 |
| A_23_P337262  | NM_153000       | APCDD1         | adenomatosis polyposis coli down-regulated 1               | ENST00000423585 | -0,947118941 |
| A_24_P645765  | NM_020782       | KLHDC5         | kelch domain containing 5                                  | ENST00000381271 | -0,947183123 |
| A_23_P97860   | NM_000235       | LIPA           | lipase A, lysosomal acid, cholesterol esterase             | ENST00000425287 | -0,947259208 |
| A_33_P3240552 | ENST00000509355 | PDE4D          | phosphodiesterase 4D, cAMP-specific                        | ENST00000509355 | -0,947460256 |
| A_23_P136371  | NM_022569       | NDST4          | N-deacetylase/N-sulfotransferase (heparan glucosaminyl) 4  | ENST00000504854 | -0,947964169 |
| A_23_P104438  | NM_032578       | MYPN           | myopalladin                                                | ENST00000354393 | -0,948494211 |

|               |                 |             |                                                             |                 |              |
|---------------|-----------------|-------------|-------------------------------------------------------------|-----------------|--------------|
| A_24_P227091  | NM_004523       | KIF11       | kinesin family member 11                                    | ENST00000260731 | -0,948560625 |
| A_21_P0005375 | THC2666780      | XLOC_006062 |                                                             |                 | -0,948656751 |
| A_23_P432448  | NR_024166       | MGC3771     | uncharacterized LOC81854                                    |                 | -0,949864886 |
| A_23_P56559   | NM_005771       | DHRS9       | dehydrogenase/reductase (SDR family) member 9               | ENST00000432060 | -0,950202917 |
| A_33_P3235546 | NM_014747       | RIMS3       | regulating synaptic membrane exocytosis 3                   | ENST00000372683 | -0,950690743 |
| A_33_P3351371 | NM_031226       | CYP19A1     | cytochrome P450, family 19, subfamily A, polypeptide 1      | ENST00000405011 | -0,952044236 |
| A_33_P3244610 | NM_178460       | SIRPD       | signal-regulatory protein delta                             | ENST00000381623 | -0,95220327  |
| A_23_P140450  | NM_003645       | SLC27A2     | solute carrier family 27 (fatty acid transporter), member 2 | ENST00000544960 | -0,952887356 |
| A_23_P112026  | NM_002164       | IDO1        | indoleamine 2,3-dioxygenase 1                               | ENST00000523779 | -0,953037859 |
| A_24_P64653   | NM_152637       | METTL7B     | methyltransferase like 7B                                   | ENST00000394252 | -0,953177494 |
| A_23_P10182   | NM_003500       | ACOX2       | acyl-CoA oxidase 2, branched chain                          | ENST00000460921 | -0,953517396 |
| A_33_P3363637 | NM_013314       | BLNK        | B-cell linker                                               | ENST00000393898 | -0,953576297 |
| A_23_P352266  | NM_000633       | BCL2        | B-cell CLL/lymphoma 2                                       | ENST00000398117 | -0,954232741 |
| A_23_P259090  | NM_031438       | NUDT12      | nudix (nucleoside diphosphate linked moiety X)-type motif   | ENST00000230792 | -0,954634047 |
| A_24_P349039  | NM_020754       | ARHGAP31    | Rho GTPase activating protein 31                            | ENST00000264245 | -0,955780068 |
| A_23_P257649  | NM_002899       | RBP1        | retinol binding protein 1, cellular                         | ENST00000232219 | -0,956826836 |
| A_23_P91390   | NM_000361       | THBD        | thrombomodulin                                              | ENST00000503590 | -0,956896491 |
| A_23_P125772  | NM_014370       | SRPK3       | SRSF protein kinase 3                                       | ENST00000370101 | -0,957297332 |
| A_23_P10182   | NM_003500       | ACOX2       | acyl-CoA oxidase 2, branched chain                          | ENST00000460921 | -0,957760464 |
| A_21_P0001003 | ENST00000420156 | XLOC_000352 |                                                             | ENST00000420156 | -0,957853439 |
| A_23_P419150  | NM_014468       | VENTX       | VENT homeobox                                               | ENST00000325980 | -0,95805743  |
| A_23_P361049  | NM_012223       | MYO1B       | myosin IB                                                   | ENST00000439065 | -0,958074299 |
| A_23_P432573  | NM_145015       | MRGPRF      | MAS-related GPR, member F                                   | ENST00000309099 | -0,958554881 |
| A_23_P104876  | NM_017425       | SPA17       | sperm autoantigenic protein 17                              | ENST00000524614 | -0,95872375  |
| A_21_P0001260 | TCONS_00000830  | XLOC_000037 |                                                             |                 | -0,958890582 |
| A_23_P145863  | NM_005620       | S100A11     | S100 calcium binding protein A11                            | ENST00000271638 | -0,959334845 |
| A_23_P121657  | NM_005114       | HS3ST1      | heparan sulfate (glucosamine) 3-O-sulfotransferase 1        | ENST00000002596 | -0,959619222 |
| A_23_P126735  | NM_000572       | IL10        | interleukin 10                                              | ENST00000423557 | -0,960018192 |
| A_33_P3252369 | NM_144632       | TMEM182     | transmembrane protein 182                                   | ENST00000412401 | -0,960755492 |

|               |                 |                |                                                              |                 |              |
|---------------|-----------------|----------------|--------------------------------------------------------------|-----------------|--------------|
| A_23_P206359  | NM_004360       | CDH1           | cadherin 1, type 1, E-cadherin (epithelial)                  | ENST00000261769 | -0,961407268 |
| A_33_P3279431 | NM_001007024    | GOSR1          | golgi SNAP receptor complex member 1                         | ENST00000414833 | -0,96173811  |
| A_23_P387184  | NM_020464       | NHSL1          | NHS-like 1                                                   | ENST00000343505 | -0,962666915 |
| A_33_P3313617 | NR_003133       | GBP1P1         | guanylate binding protein 1, interferon-inducible pseudogen  | ENST00000513638 | -0,96286564  |
| A_23_P255104  | NM_005779       | LHFPL2         | lipoma HMGIC fusion partner-like 2                           | ENST00000515007 | -0,964653579 |
| A_23_P164057  | NM_002404       | MFAP4          | microfibrillar-associated protein 4                          | ENST00000395592 | -0,96570349  |
| A_21_P0002556 | ENST00000457178 | XLOC_002542    |                                                              | ENST00000457178 | -0,966785156 |
| A_21_P0009753 | THC2527567      | XLOC_013282    |                                                              |                 | -0,966812721 |
| A_24_P237443  | NM_018990       | SASH3          | SAM and SH3 domain containing 3                              | ENST00000356892 | -0,96728676  |
| A_23_P10182   | NM_003500       | ACOX2          | acyl-CoA oxidase 2, branched chain                           | ENST00000460921 | -0,970798849 |
| A_23_P10182   | NM_003500       | ACOX2          | acyl-CoA oxidase 2, branched chain                           | ENST00000460921 | -0,971181229 |
| A_32_P157481  | NM_005236       | ERCC4          | excision repair cross-complementing rodent repair deficiency | ENST00000311895 | -0,97131035  |
| A_23_P200829  | NM_015326       | SRGAP2         | SLIT-ROBO Rho GTPase activating protein 2                    | ENST00000295713 | -0,971472898 |
| A_23_P143621  | NM_001887       | CRYBB1         | crystallin, beta B1                                          | ENST00000215939 | -0,972085825 |
| A_24_P827     | NM_003599       | SUPT3H         | suppressor of Ty 3 homolog (S. cerevisiae)                   | ENST00000371461 | -0,972197973 |
| A_23_P112026  | NM_002164       | IDO1           | indoleamine 2,3-dioxygenase 1                                | ENST00000523779 | -0,973124824 |
| A_33_P3299719 | ENST00000329335 | RP1L1          | retinitis pigmentosa 1-like 1                                | ENST00000329335 | -0,973128545 |
| A_21_P0013858 | ENST00000449645 | TMLHE          | trimethyllysine hydroxylase, epsilon                         | ENST00000449645 | -0,973171406 |
| A_21_P0013808 | THC2666070      | XLOC_I2_015673 |                                                              |                 | -0,974778576 |
| A_23_P139864  | NM_031289       | GSG1           | germ cell associated 1                                       | ENST00000351606 | -0,974787755 |
| A_23_P126735  | NM_000572       | IL10           | interleukin 10                                               | ENST00000423557 | -0,974798378 |
| A_23_P10182   | NM_003500       | ACOX2          | acyl-CoA oxidase 2, branched chain                           | ENST00000460921 | -0,974929968 |
| A_23_P29723   | NM_001012410    | SGOL1          | shugoshin-like 1 (S. pombe)                                  | ENST00000383774 | -0,9757221   |
| A_21_P0013512 | THC2568453      | XLOC_I2_014504 |                                                              |                 | -0,977259077 |
| A_21_P0014693 | ENST00000451775 | LOC100506847   |                                                              | ENST00000451775 | -0,978158434 |
| A_33_P3385266 | NM_001079528    | ABCC6          | ATP-binding cassette, sub-family C (CFTR/MRP), member 6      |                 | -0,978748236 |
| A_23_P112026  | NM_002164       | IDO1           | indoleamine 2,3-dioxygenase 1                                | ENST00000523779 | -0,97926696  |
| A_24_P374634  | NM_001164380    | STAU2          | staufen, RNA binding protein, homolog 2 (Drosophila)         | ENST00000524300 | -0,980130156 |
| A_23_P112026  | NM_002164       | IDO1           | indoleamine 2,3-dioxygenase 1                                | ENST00000523779 | -0,981412023 |

|               |                 |              |                                                               |                 |              |
|---------------|-----------------|--------------|---------------------------------------------------------------|-----------------|--------------|
| A_23_P205370  | NM_016150       | ASB2         | ankyrin repeat and SOCS box containing 2                      | ENST00000553883 | -0,982364023 |
| A_21_P0009752 | TCONS_00027258  | XLOC_013282  |                                                               |                 | -0,982658386 |
| A_33_P3416563 | NM_016108       | AIG1         | androgen-induced 1                                            | ENST00000344492 | -0,983154267 |
| A_32_P160045  | NM_152665       | TCTEX1D1     | Tctex1 domain containing 1                                    | ENST00000282670 | -0,983300854 |
| A_23_P121657  | NM_005114       | HS3ST1       | heparan sulfate (glucosamine) 3-O-sulfotransferase 1          | ENST00000002596 | -0,985160972 |
| A_33_P3363188 | NR_033856       | FLJ43315     | asparagine synthetase pseudogene                              |                 | -0,985938814 |
| A_21_P0005227 | ENST00000440213 | XLOC_006059  |                                                               | ENST00000440213 | -0,987786046 |
| A_23_P67042   | NM_017947       | MOCOS        | molybdenum cofactor sulfurase                                 | ENST00000261326 | -0,988745805 |
| A_23_P112554  | NM_001855       | COL15A1      | collagen, type XV, alpha 1                                    | ENST00000375001 | -0,988806233 |
| A_32_P128258  | NR_002804       | SIGLECP3     | sialic acid binding Ig-like lectin, pseudogene 3              |                 | -0,989401363 |
| A_23_P126735  | NM_000572       | IL10         | interleukin 10                                                | ENST00000423557 | -0,990760198 |
| A_23_P67042   | NM_017947       | MOCOS        | molybdenum cofactor sulfurase                                 | ENST00000261326 | -0,991658551 |
| A_32_P161762  | NM_004348       | RUNX2        | runt-related transcription factor 2                           | ENST00000478660 | -0,993615648 |
| A_23_P64611   | NM_176798       | P2RY6        | pyrimidinergic receptor P2Y, G-protein coupled, 6             | ENST00000538328 | -0,99442474  |
| A_23_P62647   | NM_003037       | SLAMF1       | signaling lymphocytic activation molecule family member 1     | ENST00000392208 | -0,995566178 |
| A_32_P53524   | NM_004822       | NTN1         | netrin 1                                                      | ENST00000173229 | -0,995945063 |
| A_24_P659836  | NM_001123225    | SYCE3        | synaptonemal complex central element protein 3                | ENST00000406915 | -0,995954055 |
| A_32_P86763   | NM_004613       | TGM2         | transglutaminase 2 (C polypeptide, protein-glutamine-gamr     | ENST00000361475 | -0,995970459 |
| A_23_P17354   | NM_024034       | GDAP1L1      | ganglioside-induced differentiation-associated protein 1-like | ENST00000438466 | -0,996047987 |
| A_23_P10182   | NM_003500       | ACOX2        | acyl-CoA oxidase 2, branched chain                            | ENST00000460921 | -0,996241133 |
| A_23_P256956  | NM_005733       | KIF20A       | kinesin family member 20A                                     | ENST00000502338 | -0,996299529 |
| A_23_P67042   | NM_017947       | MOCOS        | molybdenum cofactor sulfurase                                 | ENST00000261326 | -0,996874844 |
| A_23_P24493   | NM_002424       | MMP8         | matrix metalloproteinase 8 (neutrophil collagenase)           | ENST00000528662 | -0,997455796 |
| A_33_P3630777 | AJ301561        | C8orf8       | chromosome 8 open reading frame 8                             | ENST00000443854 | -0,997997811 |
| A_23_P210708  | NM_001040022    | SIRPA        | signal-regulatory protein alpha                               | ENST00000358771 | -0,998864496 |
| A_23_P112026  | NM_002164       | IDO1         | indoleamine 2,3-dioxygenase 1                                 | ENST00000523779 | -0,999177085 |
| A_21_P0001876 | ENST00000415138 | XLOC_001517  |                                                               | ENST00000415138 | -0,999267814 |
| A_33_P3880302 | NM_004442       | EPHB2        | EPH receptor B2                                               | ENST00000374632 | -0,999447558 |
| A_21_P0014829 | XR_132680       | LOC100652760 | uncharacterized LOC100652760                                  |                 | -1,000150667 |

|                |                  |                |                                                           |                 |              |
|----------------|------------------|----------------|-----------------------------------------------------------|-----------------|--------------|
| A_23_P10182    | NM_003500        | ACOX2          | acyl-CoA oxidase 2, branched chain                        | ENST00000460921 | -1,000360089 |
| A_23_P126735   | NM_000572        | IL10           | interleukin 10                                            | ENST00000423557 | -1,001117621 |
| A_21_P0010296  | THC2740132       | XLOC_014110    |                                                           |                 | -1,001756856 |
| A_21_P0004540  | TCONS_00010837   | XLOC_004644    |                                                           |                 | -1,003864089 |
| A_23_P121657   | NM_005114        | HS3ST1         | heparan sulfate (glucosamine) 3-O-sulfotransferase 1      | ENST00000002596 | -1,003985799 |
| A_23_P12363    | NM_005012        | ROR1           | receptor tyrosine kinase-like orphan receptor 1           | ENST00000545203 | -1,004240078 |
| A_23_P203475   | NM_145040        | PRKCDBP        | protein kinase C, delta binding protein                   | ENST00000303927 | -1,006424795 |
| A_23_P9523     | NM_022128        | RBKS           | ribokinase                                                | ENST00000449378 | -1,00680102  |
| A_23_P10182    | NM_003500        | ACOX2          | acyl-CoA oxidase 2, branched chain                        | ENST00000460921 | -1,007200159 |
| A_23_P74278    | NM_001037341     | PDE4B          | phosphodiesterase 4B, cAMP-specific                       | ENST00000329654 | -1,007943981 |
| A_23_P35871    | NM_024680        | E2F8           | E2F transcription factor 8                                | ENST00000396159 | -1,009279716 |
| A_33_P3272291  | NM_001818        | AKR1C4         | aldo-keto reductase family 1, member C4 (chlordecone redi | ENST00000397357 | -1,012866085 |
| A_33_P3263890  | NM_006902        | PRRX1          | paired related homeobox 1                                 | ENST00000239461 | -1,012923116 |
| A_23_P78037    | NM_006273        | CCL7           | chemokine (C-C motif) ligand 7                            | ENST00000394627 | -1,013853119 |
| A_33_P3228460  | NM_001136007     | FXYD3          | FXYD domain containing ion transport regulator 3          | ENST00000535103 | -1,015866571 |
| A_23_P9883     | NM_001079821     | NLRP3          | NLR family, pyrin domain containing 3                     | ENST00000336119 | -1,015991318 |
| A_21_P0010911  | TCONS_I2_0000384 | XLOC_I2_002171 |                                                           |                 | -1,01606057  |
| A_23_P152406   | NM_032330        | CAPNS2         | calpain, small subunit 2                                  | ENST00000457326 | -1,018611093 |
| A_23_P301521   | NM_020848        | KIAA1462       | KIAA1462                                                  | ENST00000375377 | -1,018743274 |
| A_24_P320033   | NM_005191        | CD80           | CD80 molecule                                             | ENST00000264246 | -1,01913331  |
| A_24_P23625    | ENST00000360954  | HS3ST3B1       | heparan sulfate (glucosamine) 3-O-sulfotransferase 3B1    | ENST00000360954 | -1,020807163 |
| A_33_P3326634  | NM_001164617     | GPC3           | glypican 3                                                | ENST00000394299 | -1,022740154 |
| A_19_P00808588 | NR_003133        | GBP1P1         |                                                           | ENST00000513638 | -1,025043046 |
| A_33_P3293446  | NM_020848        | KIAA1462       | KIAA1462                                                  | ENST00000375377 | -1,025052903 |
| A_21_P0003919  | BC095491         | FRG1B          | FSHD region gene 1 family, member B                       |                 | -1,02601372  |
| A_32_P108254   | NM_017565        | FAM20A         | family with sequence similarity 20, member A              | ENST00000375556 | -1,026642177 |
| A_21_P0006542  | TCONS_00017356   | XLOC_008200    |                                                           |                 | -1,027976157 |
| A_23_P398372   | NM_152833        | C9orf69        | chromosome 9 open reading frame 69                        |                 | -1,028044553 |
| A_21_P0002456  | TCONS_00004299   | XLOC_002148    |                                                           |                 | -1,028223189 |



|               |                  |                |                                                           |                 |              |
|---------------|------------------|----------------|-----------------------------------------------------------|-----------------|--------------|
| A_21_P0014653 | XR_110911        | LOC100507521   | uncharacterized LOC100507521                              | ENST00000524942 | -1,028507076 |
| A_33_P3289917 | NM_001134657     | PRR23C         | proline rich 23C                                          | ENST00000502927 | -1,029628599 |
| A_24_P6305    | NM_006013        | RPL10          | ribosomal protein L10                                     | ENST00000424325 | -1,030405389 |
| A_23_P73114   | NM_000313        | PROS1          | protein S (alpha)                                         | ENST00000394236 | -1,030471753 |
| A_23_P320113  | NM_080725        | SRXN1          | sulfiredoxin 1                                            | ENST00000427916 | -1,030998646 |
| A_23_P105465  | NM_004072        | CMKLR1         | chemokine-like receptor 1                                 | ENST00000550402 | -1,032999366 |
| A_33_P3666817 | NM_001001791     | C10orf55       | chromosome 10 open reading frame 55                       | ENST00000412307 | -1,033706061 |
| A_21_P0002052 | TCONS_00003286   | XLOC_002099    |                                                           |                 | -1,0358711   |
| A_23_P37410   | NM_031226        | CYP19A1        | cytochrome P450, family 19, subfamily A, polypeptide 1    | ENST00000541721 | -1,036031452 |
| A_24_P26897   | NM_005539        | INPP5A         | inositol polyphosphate-5-phosphatase, 40kDa               | ENST00000368594 | -1,036770673 |
| A_23_P204847  | NM_002298        | LCP1           | lymphocyte cytosolic protein 1 (L-plastin)                | ENST00000398576 | -1,036937888 |
| A_21_P0001988 | ENST00000433724  | XLOC_001932    |                                                           | ENST00000433724 | -1,040157023 |
| A_21_P0012909 | TCONS_I2_0002293 | XLOC_I2_012071 |                                                           |                 | -1,041666551 |
| A_21_P0011933 | NR_037597        | LOC442028      | uncharacterized LOC442028                                 |                 | -1,041863389 |
| A_32_P126375  | NM_198270        | NHS            | Nance-Horan syndrome (congenital cataracts and dental an  | ENST00000398097 | -1,042464205 |
| A_23_P103703  | NM_014424        | HSPB7          | heat shock 27kDa protein family, member 7 (cardiovascular | ENST00000375714 | -1,043184665 |
| A_33_P3283824 | NM_001135147     | SLC39A8        | solute carrier family 39 (zinc transporter), member 8     | ENST00000424970 | -1,043217681 |
| A_33_P3729375 | AK093857         | LOC285181      | uncharacterized LOC285181                                 |                 | -1,044131169 |
| A_23_P434919  | NM_152304        | RAB42          | RAB42, member RAS oncogene family                         | ENST00000465518 | -1,04512012  |
| A_33_P3246833 | NM_173843        | IL1RN          | interleukin 1 receptor antagonist                         | ENST00000259206 | -1,046094857 |
| A_23_P253791  | NM_004345        | CAMP           | cathelicidin antimicrobial peptide                        | ENST00000296435 | -1,047130215 |
| A_23_P105465  | NM_004072        | CMKLR1         | chemokine-like receptor 1                                 | ENST00000550402 | -1,047318892 |
| A_33_P3274501 | NM_016523        | KLRF1          | killer cell lectin-like receptor subfamily F, member 1    | ENST00000545196 | -1,048069009 |
| A_33_P3381671 | BC016366         | LOC731424      | uncharacterized LOC731424                                 |                 | -1,048124051 |
| A_23_P110941  | NM_001512        | GSTA4          | glutathione S-transferase alpha 4                         | ENST00000370960 | -1,048134469 |
| A_23_P85240   | NM_016562        | TLR7           | toll-like receptor 7                                      | ENST00000380659 | -1,048330314 |
| A_23_P364414  | NM_032089        | PCDHGA9        | protocadherin gamma subfamily A, 9                        |                 | -1,049545506 |
| A_23_P421401  | NM_002609        | PDGFRB         | platelet-derived growth factor receptor, beta polypeptide | ENST00000544453 | -1,050377866 |
| A_21_P0008360 | TCONS_00022563   | XLOC_010881    |                                                           |                 | -1,051463635 |

|               |                                 |             |                                                                       |                 |              |
|---------------|---------------------------------|-------------|-----------------------------------------------------------------------|-----------------|--------------|
| A_23_P51085   | NM_020675                       | SPC25       | SPC25, NDC80 kinetochore complex component, homolog ( ENST00000282074 | -1,051515701    |              |
| A_24_P16353   | NR_028346                       | TRIM53P     | tripartite motif containing 53, pseudogene                            | -1,051891669    |              |
| A_23_P15832   | NM_014566                       | OR1D5       | olfactory receptor, family 1, subfamily D, member 5                   | ENST00000531680 | -1,053136293 |
| A_33_P3295203 | NM_001523                       | HAS1        | hyaluronan synthase 1                                                 | ENST00000376737 | -1,053657958 |
| A_23_P26771   | NM_006678                       | CD300C      | CD300c molecule                                                       | ENST00000330793 | -1,054672374 |
| A_23_P67042   | NM_017947                       | MOCOS       | molybdenum cofactor sulfurase                                         | ENST00000261326 | -1,057311578 |
| A_23_P75299   | NM_022126                       | LHPP        | phospholysine phosphohistidine inorganic pyrophosphate p              | ENST00000368842 | -1,059519032 |
| A_33_P3258046 | NM_170685                       | TAC4        | tachykinin 4 (hemokinin)                                              | ENST00000334568 | -1,060299904 |
| A_23_P401709  | NM_152504                       | C20orf196   | chromosome 20 open reading frame 196                                  | ENST00000445603 | -1,061629438 |
| A_21_P0010537 | TCONS_I2_0000039(XLOC_I2_000297 |             |                                                                       |                 | -1,063066065 |
| A_24_P387609  | NM_030940                       | ISCA1       | iron-sulfur cluster assembly 1 homolog (S. cerevisiae)                | ENST00000375991 | -1,063512304 |
| A_21_P0001478 | TCONS_00001418                  | XLOC_000737 |                                                                       |                 | -1,067354365 |
| A_23_P12363   | NM_005012                       | ROR1        | receptor tyrosine kinase-like orphan receptor 1                       | ENST00000545203 | -1,067430834 |
| A_23_P67042   | NM_017947                       | MOCOS       | molybdenum cofactor sulfurase                                         | ENST00000261326 | -1,068045789 |
| A_23_P108823  | NM_032523                       | OSBPL6      | oxysterol binding protein-like 6                                      | ENST00000315022 | -1,068107549 |
| A_24_P49199   | NM_181789                       | GLDN        | gliomedin                                                             | ENST00000396399 | -1,068200954 |
| A_24_P260101  | NM_007289                       | MME         | membrane metallo-endorpeptidase                                       | ENST00000460393 | -1,068847043 |
| A_23_P18684   | NM_004362                       | CLGN        | calmegin                                                              | ENST00000545667 | -1,069062784 |
| A_23_P67042   | NM_017947                       | MOCOS       | molybdenum cofactor sulfurase                                         | ENST00000261326 | -1,070663664 |
| A_33_P3284508 | NM_001174104                    | CD14        | CD14 molecule                                                         | ENST00000302014 | -1,07072231  |
| A_24_P148717  | NM_001295                       | CCR1        | chemokine (C-C motif) receptor 1                                      | ENST00000296140 | -1,07273388  |
| A_23_P121657  | NM_005114                       | HS3ST1      | heparan sulfate (glucosamine) 3-O-sulfotransferase 1                  | ENST00000002596 | -1,073274757 |
| A_23_P147641  | NM_003195                       | TCEA2       | transcription elongation factor A (SII), 2                            | ENST00000440819 | -1,073860465 |
| A_23_P67042   | NM_017947                       | MOCOS       | molybdenum cofactor sulfurase                                         | ENST00000261326 | -1,075697343 |
| A_32_P83845   | NM_001040708                    | HEY1        | hairy/enhancer-of-split related with YRPW motif 1                     | ENST00000337919 | -1,075706    |
| A_24_P245379  | NM_002575                       | SERPINB2    | serpin peptidase inhibitor, clade B (ovalbumin), member 2             | ENST00000457692 | -1,076963558 |
| A_21_P0007466 | ENST00000526385                 | XLOC_009530 |                                                                       | ENST00000526385 | -1,076979086 |
| A_33_P3308686 | NM_020785                       | CC2D2A      | coiled-coil and C2 domain containing 2A                               | ENST00000438599 | -1,080094015 |
| A_23_P121106  | NM_003865                       | HESX1       | HESX homeobox 1                                                       | ENST00000295934 | -1,08040995  |

|               |                  |                |                                                                       |                 |              |
|---------------|------------------|----------------|-----------------------------------------------------------------------|-----------------|--------------|
| A_21_P0005189 | XR_108720        | LOC100507642   | uncharacterized LOC100507642                                          |                 | -1,08144953  |
| A_21_P0013514 | TCONS_I2_0002818 | XLOC_I2_014504 |                                                                       |                 | -1,081832174 |
| A_23_P47904   | NM_033124        | CCDC65         | coiled-coil domain containing 65                                      | ENST00000552188 | -1,08274723  |
| A_24_P10444   | NM_173623        | TTL6           | tubulin tyrosine ligase-like family, member 6                         | ENST00000376681 | -1,084571674 |
| A_33_P3344169 | NM_001033560     | DYX1C1         | dyslexia susceptibility 1 candidate 1                                 | ENST00000380679 | -1,084987176 |
| A_24_P67395   | NM_002273        | KRT8           | keratin 8                                                             | ENST00000546826 | -1,086313352 |
| A_33_P3213235 | NM_198492        | CLEC4G         | C-type lectin domain family 4, member G                               | ENST00000381308 | -1,086522371 |
| A_33_P3405848 | NM_175719        | TPO            | thyroid peroxidase                                                    | ENST00000497517 | -1,088412622 |
| A_23_P147025  | NM_004794        | RAB33A         | RAB33A, member RAS oncogene family                                    | ENST00000257017 | -1,088585374 |
| A_21_P0013475 | TCONS_I2_0002773 | XLOC_I2_014191 |                                                                       |                 | -1,090502565 |
| A_23_P49539   | NM_001080519     | BAHCC1         | BAH domain and coiled-coil containing 1                               | ENST00000307745 | -1,093064889 |
| A_24_P666105  | NM_001134745     | LRRTM4         | leucine rich repeat transmembrane neuronal 4                          | ENST00000409911 | -1,093945196 |
| A_21_P0012586 | TCONS_I2_0002054 | XLOC_I2_010687 |                                                                       |                 | -1,094304345 |
| A_23_P67042   | NM_017947        | MOCOS          | molybdenum cofactor sulfurase                                         | ENST00000261326 | -1,094373041 |
| A_23_P337934  | NM_017556        | FBLIM1         | filamin binding LIM protein 1                                         | ENST00000400773 | -1,105152161 |
| A_23_P390518  | NM_003839        | TNFRSF11A      | tumor necrosis factor receptor superfamily, member 11a, N             | ENST00000382790 | -1,105651412 |
| A_24_P272451  | AK057142         | C17orf87       | chromosome 17 open reading frame 87                                   |                 | -1,106060631 |
| A_23_P12363   | NM_005012        | ROR1           | receptor tyrosine kinase-like orphan receptor 1                       | ENST00000545203 | -1,108178924 |
| A_33_P3284883 | NM_024761        | MOB3B          | MOB kinase activator 3B                                               | ENST00000262244 | -1,11163868  |
| A_23_P251075  | NM_005491        | MAMLD1         | mastermind-like domain containing 1                                   | ENST00000464149 | -1,111754381 |
| A_24_P588897  | NM_013272        | SLCO3A1        | solute carrier organic anion transporter family, member 3A            | ENST00000318445 | -1,116313921 |
| A_23_P12363   | NM_005012        | ROR1           | receptor tyrosine kinase-like orphan receptor 1                       | ENST00000545203 | -1,12119195  |
| A_32_P151800  | NM_207418        | FAM72D         | family with sequence similarity 72, member D                          | ENST00000341209 | -1,121411227 |
| A_23_P391443  | NM_020700        | PPM1H          | protein phosphatase, Mg <sup>2+</sup> /Mn <sup>2+</sup> dependent, 1H | ENST00000228705 | -1,122883365 |
| A_21_P0006135 | TCONS_00015940   | XLOC_007308    |                                                                       |                 | -1,123318382 |
| A_33_P3324004 | NM_032965        | CCL15          | chemokine (C-C motif) ligand 15                                       | ENST00000354059 | -1,124047259 |
| A_23_P72096   | NM_000575        | IL1A           | interleukin 1, alpha                                                  | ENST00000263339 | -1,126611401 |
| A_33_P3289406 | NR_026998        | LOC91450       | uncharacterized LOC91450                                              |                 | -1,128319258 |
| A_23_P55649   | NM_001462        | FPR2           | formyl peptide receptor 2                                             | ENST00000340023 | -1,129416409 |

|                |                 |                |                                                            |                 |              |
|----------------|-----------------|----------------|------------------------------------------------------------|-----------------|--------------|
| A_21_P0012659  | ENST00000513843 | XLOC_I2_011095 |                                                            | ENST00000513843 | -1,129576524 |
| A_23_P121564   | NM_000857       | GUCY1B3        | guanylate cyclase 1, soluble, beta 3                       | ENST00000264424 | -1,13323176  |
| A_24_P278126   | NM_002485       | NBN            | nibrin                                                     | ENST00000396252 | -1,133923045 |
| A_33_P3396404  | NM_001025232    | CLLU1OS        | chronic lymphocytic leukemia up-regulated 1 opposite strar | ENST00000378487 | -1,134123015 |
| A_24_P124624   | NM_002543       | OLR1           | oxidized low density lipoprotein (lectin-like) receptor 1  | ENST00000309539 | -1,134951346 |
| A_24_P766716   | NM_001142343    | CMKLR1         | chemokine-like receptor 1                                  | ENST00000312143 | -1,136364555 |
| A_33_P3296707  | NM_001078173    | FAM127C        | family with sequence similarity 127, member C              | ENST00000391440 | -1,140101013 |
| A_21_P0008015  | ENST00000433569 | XLOC_010694    |                                                            | ENST00000433569 | -1,1438554   |
| A_33_P3384045  | XR_110862       | NSAP11         | nervous system abundant protein 11                         |                 | -1,143944123 |
| A_33_P3415097  | NM_001830       | CLCN4          | chloride channel 4                                         | ENST00000380833 | -1,145147264 |
| A_23_P13382    | NM_001013254    | LSP1           | lymphocyte-specific protein 1                              | ENST00000406638 | -1,146848967 |
| A_19_P00321097 | ENST00000415245 | XLOC_001394    |                                                            | ENST00000415245 | -1,146993555 |
| A_19_P00317210 | TCONS_00021644  | XLOC_010593    |                                                            |                 | -1,147064001 |
| A_21_P0005926  | TCONS_00015234  | XLOC_006723    |                                                            |                 | -1,147639903 |
| A_23_P105465   | NM_004072       | CMKLR1         | chemokine-like receptor 1                                  | ENST00000550402 | -1,147926041 |
| A_23_P72096    | NM_000575       | IL1A           | interleukin 1, alpha                                       | ENST00000263339 | -1,148378395 |
| A_21_P0009147  | NR_038847       | LOC100505576   | uncharacterized LOC100505576                               |                 | -1,150191614 |
| A_24_P235266   | NM_001001555    | GRB10          | growth factor receptor-bound protein 10                    | ENST00000403097 | -1,152218414 |
| A_23_P72096    | NM_000575       | IL1A           | interleukin 1, alpha                                       | ENST00000263339 | -1,152920741 |
| A_23_P105465   | NM_004072       | CMKLR1         | chemokine-like receptor 1                                  | ENST00000550402 | -1,153752012 |
| A_23_P170574   | NM_178310       | SNAI3          | snail homolog 3 (Drosophila)                               | ENST00000332281 | -1,159491814 |
| A_23_P72096    | NM_000575       | IL1A           | interleukin 1, alpha                                       | ENST00000263339 | -1,162118905 |
| A_23_P72096    | NM_000575       | IL1A           | interleukin 1, alpha                                       | ENST00000263339 | -1,163737829 |
| A_24_P363548   | NM_005338       | HIP1           | huntingtin interacting protein 1                           | ENST00000336926 | -1,164276424 |
| A_21_P0006605  | TCONS_00017645  | XLOC_008317    |                                                            |                 | -1,164423395 |
| A_23_P72096    | NM_000575       | IL1A           | interleukin 1, alpha                                       | ENST00000263339 | -1,164803223 |
| A_23_P72096    | NM_000575       | IL1A           | interleukin 1, alpha                                       | ENST00000263339 | -1,165220742 |
| A_33_P3269110  | NM_001130686    | GUCY1A3        | guanylate cyclase 1, soluble, alpha 3                      | ENST00000512983 | -1,167314505 |
| A_23_P121106   | NM_003865       | HESX1          | HESX homeobox 1                                            | ENST00000295934 | -1,170809761 |

|               |                                 |          |                                                                |                 |              |
|---------------|---------------------------------|----------|----------------------------------------------------------------|-----------------|--------------|
| A_33_P3410654 | NM_205852                       | CLEC12B  | C-type lectin domain family 12, member B                       | ENST00000396502 | -1,171657062 |
| A_23_P17053   | NM_019618                       | IL36G    | interleukin 36, gamma                                          | ENST00000259205 | -1,174529091 |
| A_23_P139682  | NM_002864                       | PZP      | pregnancy-zone protein                                         | ENST00000535230 | -1,174574274 |
| A_32_P24585   | NM_001017995                    | SH3PXD2B | SH3 and PX domains 2B                                          | ENST00000311601 | -1,177593782 |
| A_33_P3316539 | NM_001008539                    | SLC7A2   | solute carrier family 7 (cationic amino acid transporter, y+ s | ENST00000004531 | -1,182676738 |
| A_24_P236235  | NM_013231                       | FLRT2    | fibronectin leucine rich transmembrane protein 2               | ENST00000330753 | -1,18422578  |
| A_23_P72096   | NM_000575                       | IL1A     | interleukin 1, alpha                                           | ENST00000263339 | -1,185759846 |
| A_23_P69573   | NM_000856                       | GUCY1A3  | guanylate cyclase 1, soluble, alpha 3                          | ENST00000455639 | -1,186810458 |
| A_23_P72096   | NM_000575                       | IL1A     | interleukin 1, alpha                                           | ENST00000263339 | -1,188482668 |
| A_33_P3774867 | BC094703                        | MGC11082 | uncharacterized LOC84777                                       |                 | -1,193299861 |
| A_23_P72096   | NM_000575                       | IL1A     | interleukin 1, alpha                                           | ENST00000263339 | -1,193589469 |
| A_23_P121064  | NM_002852                       | PTX3     | pentraxin 3, long                                              | ENST00000295927 | -1,19523639  |
| A_23_P12363   | NM_005012                       | ROR1     | receptor tyrosine kinase-like orphan receptor 1                | ENST00000545203 | -1,195344512 |
| A_23_P121064  | NM_002852                       | PTX3     | pentraxin 3, long                                              | ENST00000295927 | -1,201059549 |
| A_33_P3220470 | NM_005585                       | SMAD6    | SMAD family member 6                                           | ENST00000338426 | -1,202529804 |
| A_23_P121106  | NM_003865                       | HESX1    | HESX homeobox 1                                                | ENST00000295934 | -1,20393177  |
| A_33_P3367201 | NM_052845                       | MMAB     | methylmalonic aciduria (cobalamin deficiency) cblB type        |                 | -1,205810064 |
| A_23_P121064  | NM_002852                       | PTX3     | pentraxin 3, long                                              | ENST00000295927 | -1,206914019 |
| A_24_P225616  | NM_001034                       | RRM2     | ribonucleotide reductase M2                                    | ENST00000304567 | -1,209013089 |
| A_21_P0012418 | TCONS_I2_0001904(XLOC_I2_010029 |          |                                                                |                 | -1,214589536 |
| A_32_P456318  | NM_080743                       | SRSF12   | serine/arginine-rich splicing factor 12                        | ENST00000452027 | -1,214679249 |
| A_23_P425304  | NM_016169                       | SUFU     | suppressor of fused homolog (Drosophila)                       | ENST00000369902 | -1,216168455 |
| A_23_P121064  | NM_002852                       | PTX3     | pentraxin 3, long                                              | ENST00000295927 | -1,2165002   |
| A_23_P121064  | NM_002852                       | PTX3     | pentraxin 3, long                                              | ENST00000295927 | -1,218341479 |
| A_24_P935103  | NM_001116                       | ADCY9    | adenylate cyclase 9                                            | ENST00000294016 | -1,219293094 |
| A_23_P121106  | NM_003865                       | HESX1    | HESX homeobox 1                                                | ENST00000295934 | -1,226759523 |
| A_23_P121064  | NM_002852                       | PTX3     | pentraxin 3, long                                              | ENST00000295927 | -1,226926735 |
| A_23_P105465  | NM_004072                       | CMKLR1   | chemokine-like receptor 1                                      | ENST00000550402 | -1,228882014 |
| A_23_P210690  | NM_021158                       | TRIB3    | tribbles homolog 3 (Drosophila)                                | ENST00000217233 | -1,229606676 |



|               |                  |                |                                                            |                 |              |
|---------------|------------------|----------------|------------------------------------------------------------|-----------------|--------------|
| A_33_P3313730 | NM_001145855     | SH3BP2         | SH3-domain binding protein 2                               | ENST00000356331 | -1,230730131 |
| A_24_P346855  | NM_002417        | MKI67          | antigen identified by monoclonal antibody Ki-67            | ENST00000537609 | -1,231533719 |
| A_23_P82868   | NM_000930        | PLAT           | plasminogen activator, tissue                              | ENST00000352041 | -1,231567637 |
| A_21_P0010626 | NM_058179        | PSAT1          | phosphoserine aminotransferase 1                           | ENST00000421149 | -1,23183481  |
| A_23_P121064  | NM_002852        | PTX3           | pentraxin 3, long                                          | ENST00000295927 | -1,231996302 |
| A_23_P55749   | NM_015719        | COL5A3         | collagen, type V, alpha 3                                  | ENST00000264828 | -1,233203895 |
| A_23_P12363   | NM_005012        | ROR1           | receptor tyrosine kinase-like orphan receptor 1            | ENST00000545203 | -1,234084153 |
| A_23_P328323  | NM_018211        | RAVER2         | ribonucleoprotein, PTB-binding 2                           | ENST00000294428 | -1,235262076 |
| A_21_P0013592 | TCONS_I2_0002883 | XLOC_I2_014850 |                                                            |                 | -1,235904325 |
| A_23_P121064  | NM_002852        | PTX3           | pentraxin 3, long                                          | ENST00000295927 | -1,237712012 |
| A_33_P3239282 | NM_004974        | KCNA2          | potassium voltage-gated channel, shaker-related subfamily, | ENST00000316361 | -1,243144573 |
| A_33_P3399090 | NM_001037954     | DIXDC1         | DIX domain containing 1                                    | ENST00000440460 | -1,244403068 |
| A_23_P71037   | NM_000600        | IL6            | interleukin 6 (interferon, beta 2)                         | ENST00000485300 | -1,245856215 |
| A_33_P3352098 | NM_021201        | MS4A7          | membrane-spanning 4-domains, subfamily A, member 7         | ENST00000358246 | -1,249855138 |
| A_23_P49448   | NM_024306        | FA2H           | fatty acid 2-hydroxylase                                   | ENST00000219368 | -1,250657304 |
| A_23_P12363   | NM_005012        | ROR1           | receptor tyrosine kinase-like orphan receptor 1            | ENST00000545203 | -1,251050901 |
| A_23_P407096  | NM_152625        | ZNF366         | zinc finger protein 366                                    | ENST00000318442 | -1,252041093 |
| A_23_P121064  | NM_002852        | PTX3           | pentraxin 3, long                                          | ENST00000295927 | -1,252927023 |
| A_23_P121064  | NM_002852        | PTX3           | pentraxin 3, long                                          | ENST00000295927 | -1,254557111 |
| A_23_P150903  | NM_018099        | FAR2           | fatty acyl CoA reductase 2                                 | ENST00000182377 | -1,265496019 |
| A_23_P256956  | NM_005733        | KIF20A         | kinesin family member 20A                                  | ENST00000502338 | -1,268410239 |
| A_24_P942321  | NM_018027        | FRMD4A         | FERM domain containing 4A                                  | ENST00000357447 | -1,283051551 |
| A_33_P3281695 | NM_001243133     | NLRP3          | NLR family, pyrin domain containing 3                      | ENST00000391827 | -1,283091872 |
| A_21_P0007119 | NR_033847        | FLJ37035       | uncharacterized LOC399821                                  | ENST00000527483 | -1,283210895 |
| A_21_P0002805 | ENST00000467896  | XLOC_002921    |                                                            | ENST00000467896 | -1,286322204 |
| A_23_P11201   | NM_001097579     | GPR34          | G protein-coupled receptor 34                              | ENST00000535368 | -1,287627239 |
| A_23_P12363   | NM_005012        | ROR1           | receptor tyrosine kinase-like orphan receptor 1            | ENST00000545203 | -1,29288272  |
| A_33_P3303810 | NM_005558        | LAD1           | ladinin 1                                                  | ENST00000367313 | -1,297153525 |
| A_23_P82868   | NM_000930        | PLAT           | plasminogen activator, tissue                              | ENST00000352041 | -1,302665329 |

|                |                 |              |                                                        |                 |              |
|----------------|-----------------|--------------|--------------------------------------------------------|-----------------|--------------|
| A_23_P121106   | NM_003865       | HESX1        | HESX homeobox 1                                        | ENST00000295934 | -1,303512389 |
| A_33_P3407013  | ENST00000420258 | IL6          | interleukin 6 (interferon, beta 2)                     | ENST00000420258 | -1,305376179 |
| A_23_P82868    | NM_000930       | PLAT         | plasminogen activator, tissue                          | ENST00000352041 | -1,306507725 |
| A_24_P188800   | NM_017923       | Mar-01       | membrane-associated ring finger (C3HC4) 1              | ENST00000339875 | -1,306635639 |
| A_24_P112941   | NM_032808       | LINGO1       | leucine rich repeat and Ig domain containing 1         | ENST00000355300 | -1,308766871 |
| A_19_P00320881 | NR_040025       | LOC100505474 | uncharacterized LOC100505474                           |                 | -1,311332665 |
| A_23_P82868    | NM_000930       | PLAT         | plasminogen activator, tissue                          | ENST00000352041 | -1,317285502 |
| A_32_P96000    | NM_001004341    | ETV3L        | ets variant 3-like                                     | ENST00000454449 | -1,317885432 |
| A_24_P158718   | NM_015177       | DTX4         | deltex homolog 4 (Drosophila)                          | ENST00000227451 | -1,318196054 |
| A_23_P82868    | NM_000930       | PLAT         | plasminogen activator, tissue                          | ENST00000352041 | -1,343484488 |
| A_23_P11201    | NM_001097579    | GPR34        | G protein-coupled receptor 34                          | ENST00000535368 | -1,344090263 |
| A_23_P82868    | NM_000930       | PLAT         | plasminogen activator, tissue                          | ENST00000352041 | -1,344437177 |
| A_24_P592012   | NM_025224       | ZBTB46       | zinc finger and BTB domain containing 46               | ENST00000245663 | -1,345900223 |
| A_33_P3364488  | NM_001170631    | FCAMR        | Fc receptor, IgA, IgM, high affinity                   | ENST00000450945 | -1,349635962 |
| A_23_P11201    | NM_001097579    | GPR34        | G protein-coupled receptor 34                          | ENST00000535368 | -1,355519901 |
| A_23_P119835   | NM_021209       | NLRC4        | NLR family, CARD domain containing 4                   | ENST00000404025 | -1,35662958  |
| A_23_P82868    | NM_000930       | PLAT         | plasminogen activator, tissue                          | ENST00000352041 | -1,357645907 |
| A_33_P3282641  | NR_033752       | LOC344887    | NmrA-like family domain containing 1 pseudogene        | ENST00000416764 | -1,363672851 |
| A_33_P3408152  | NM_021076       | NEFH         | neurofilament, heavy polypeptide                       | ENST00000328842 | -1,375285962 |
| A_23_P257815   | NM_005582       | CD180        | CD180 molecule                                         | ENST00000256447 | -1,376510295 |
| A_23_P82868    | NM_000930       | PLAT         | plasminogen activator, tissue                          | ENST00000352041 | -1,385080694 |
| A_21_P0000695  | NR_037867       | LOC731424    | uncharacterized LOC731424                              |                 | -1,394606456 |
| A_23_P82868    | NM_000930       | PLAT         | plasminogen activator, tissue                          | ENST00000352041 | -1,398237535 |
| A_33_P3705884  | AK094188        | LOC148189    | uncharacterized LOC148189                              |                 | -1,400736902 |
| A_23_P333498   | NM_030636       | EEPD1        | endonuclease/exonuclease/phosphatase family domain cor | ENST00000242108 | -1,409089563 |
| A_21_P0000575  | NR_029193       | LOC100287216 | uncharacterized LOC100287216                           |                 | -1,423751322 |
| A_32_P101031   | NM_144586       | LYPD1        | LY6/PLAUR domain containing 1                          | ENST00000397463 | -1,441351349 |
| A_23_P82868    | NM_000930       | PLAT         | plasminogen activator, tissue                          | ENST00000352041 | -1,461874794 |
| A_23_P46482    | NM_018724       | IL20         | interleukin 20                                         | ENST00000367096 | -1,464116096 |

|               |              |         |                                                           |                 |              |
|---------------|--------------|---------|-----------------------------------------------------------|-----------------|--------------|
| A_24_P787897  | NM_022166    | XYLT1   | xylosyltransferase I                                      |                 | -1,470331736 |
| A_23_P121106  | NM_003865    | HESX1   | HESX homeobox 1                                           | ENST00000295934 | -1,479085425 |
| A_23_P8801    | NM_000777    | CYP3A5  | cytochrome P450, family 3, subfamily A, polypeptide 5     | ENST00000339843 | -1,492064762 |
| A_23_P207456  | NM_005623    | CCL8    | chemokine (C-C motif) ligand 8                            | ENST00000225840 | -1,520366177 |
| A_23_P49759   | NM_002981    | CCL1    | chemokine (C-C motif) ligand 1                            | ENST00000225842 | -1,521423243 |
| A_23_P76078   | NM_016584    | IL23A   | interleukin 23, alpha subunit p19                         | ENST00000228534 | -1,526691888 |
| A_23_P121106  | NM_003865    | HESX1   | HESX homeobox 1                                           | ENST00000295934 | -1,563292492 |
| A_23_P145724  | NM_006658    | PPP1R17 | protein phosphatase 1, regulatory subunit 17              | ENST00000342032 | -1,563360666 |
| A_23_P121106  | NM_003865    | HESX1   | HESX homeobox 1                                           | ENST00000295934 | -1,564350844 |
| A_23_P21485   | NM_017933    | PID1    | phosphotyrosine interaction domain containing 1           | ENST00000392055 | -1,568924733 |
| A_24_P411186  | NM_022893    | BCL11A  | B-cell CLL/lymphoma 11A (zinc finger protein)             | ENST00000335712 | -1,57525829  |
| A_23_P79518   | NM_000576    | IL1B    | interleukin 1, beta                                       | ENST00000263341 | -1,57707841  |
| A_23_P79518   | NM_000576    | IL1B    | interleukin 1, beta                                       | ENST00000263341 | -1,581619224 |
| A_23_P37892   | NM_133443    | GPT2    | glutamic pyruvate transaminase (alanine aminotransferase) | ENST00000440783 | -1,582798299 |
| A_23_P79518   | NM_000576    | IL1B    | interleukin 1, beta                                       | ENST00000263341 | -1,586437647 |
| A_23_P79518   | NM_000576    | IL1B    | interleukin 1, beta                                       | ENST00000263341 | -1,58995395  |
| A_23_P79518   | NM_000576    | IL1B    | interleukin 1, beta                                       | ENST00000263341 | -1,592549415 |
| A_23_P79518   | NM_000576    | IL1B    | interleukin 1, beta                                       | ENST00000263341 | -1,597616649 |
| A_23_P79518   | NM_000576    | IL1B    | interleukin 1, beta                                       | ENST00000263341 | -1,600134803 |
| A_23_P79518   | NM_000576    | IL1B    | interleukin 1, beta                                       | ENST00000263341 | -1,600192209 |
| A_23_P121106  | NM_003865    | HESX1   | HESX homeobox 1                                           | ENST00000295934 | -1,612067562 |
| A_23_P79518   | NM_000576    | IL1B    | interleukin 1, beta                                       | ENST00000263341 | -1,613331817 |
| A_23_P79518   | NM_000576    | IL1B    | interleukin 1, beta                                       | ENST00000263341 | -1,614876346 |
| A_23_P121106  | NM_003865    | HESX1   | HESX homeobox 1                                           | ENST00000295934 | -1,636661092 |
| A_33_P3281191 | NM_002508    | NID1    | nidogen 1                                                 | ENST00000366595 | -1,6732232   |
| A_33_P3380383 | NM_001099221 | TIFAB   | TRAF-interacting protein with forkhead-associated domain, | ENST00000537858 | -1,722197785 |
| A_24_P759477  | NM_002214    | ITGB8   | integrin, beta 8                                          |                 | -1,734584166 |
| A_23_P35092   | NM_153758    | IL19    | interleukin 19                                            | ENST00000270218 | -1,762883404 |
| A_33_P3341499 | NM_003392    | WNT5A   | wingless-type MMTV integration site family, member 5A     | ENST00000264634 | -1,870128938 |

A\_23\_P7560

NM\_002187

IL12B

interleukin 12B (natural killer cell stimulatory factor 2, cytotoxic T lymphocyte-inducing protein beta 2, ENST00000231228)

-2,188051615

Comparison of gene expression profiling between NYBH-infected macrophages

| ProbeName     | SystematicName | GeneSymbol | GeneName                                                    | EnsemblID       | NYBH vs<br>MØ_logFC |
|---------------|----------------|------------|-------------------------------------------------------------|-----------------|---------------------|
| A_23_P388871  | NM_175054      | HIST4H4    | histone cluster 4, H4                                       | ENST00000539745 | 1,903528944         |
| A_23_P431179  | NM_003538      | HIST1H4A   | histone cluster 1, H4a                                      | ENST00000359907 | 1,898420887         |
| A_21_P0000504 | NR_023344      | RNU6ATAC   | RNA, U6atac small nuclear (U12-dependent splicing)          |                 | 1,862203969         |
| A_33_P3279708 | NR_002761      | RNU2-2     | RNA, U2 small nuclear 2                                     | ENST00000538098 | 1,733639656         |
| A_21_P0000513 | NR_026703      | VTRNA1-1   | vault RNA 1-1                                               |                 | 1,69975858          |
| A_23_P359540  | NM_003540      | HIST1H4F   | histone cluster 1, H4f                                      | ENST00000377745 | 1,695756685         |
| A_33_P3390107 | NR_003286      | RN18S1     | RNA, 18S ribosomal 1                                        |                 | 1,681246991         |
| A_33_P3273584 | NR_003023      | SCARNA2    | small Cajal body-specific RNA 2                             |                 | 1,67009562          |
| A_33_P3351851 | NM_003546      | HIST1H4L   | histone cluster 1, H4l                                      | ENST00000355981 | 1,609735844         |
| A_33_P3410836 | NM_003539      | HIST1H4D   | histone cluster 1, H4d                                      | ENST00000340756 | 1,579379594         |
| A_33_P3267263 | NR_004400      | RNU1-5     | RNA, U1 small nuclear 5                                     |                 | 1,54686462          |
| A_23_P363936  | NM_014278      | HSPA4L     | heat shock 70kDa protein 4-like                             | ENST00000296464 | 1,531063945         |
| A_23_P436281  | NM_001034077   | HIST2H4B   | histone cluster 2, H4b                                      | ENST00000392933 | 1,504193551         |
| A_33_P3226995 | NM_006137      | CD7        | CD7 molecule                                                | ENST00000312648 | 1,423925293         |
| A_23_P30805   | NM_021968      | HIST1H4J   | histone cluster 1, H4j                                      | ENST00000355057 | 1,423053321         |
| A_24_P20873   | NM_003495      | HIST1H4I   | histone cluster 1, H4i                                      | ENST00000354348 | 1,409956471         |
| A_23_P323685  | NM_003543      | HIST1H4H   | histone cluster 1, H4h                                      | ENST00000377727 | 1,389626048         |
| A_33_P3344229 | NM_003538      | HIST1H4A   | histone cluster 1, H4a                                      | ENST00000359907 | 1,389598259         |
| A_33_P3257678 | NM_001005464   | HIST2H3A   | histone cluster 2, H3a                                      | ENST00000369158 | 1,385961283         |
| A_23_P364324  | NM_152701      | ABCA13     | ATP-binding cassette, sub-family A (ABC1), member 13        | ENST00000435803 | 1,340129275         |
| A_23_P30813   | NM_003541      | HIST1H4K   | histone cluster 1, H4k                                      | ENST00000357549 | 1,31089744          |
| A_33_P3299865 | NM_003541      | HIST1H4K   | histone cluster 1, H4k                                      | ENST00000355057 | 1,310651851         |
| A_33_P3305521 | AB029007       | ZNF507     | zinc finger protein 507                                     |                 | 1,295461454         |
| A_33_P3336113 | NM_145719      | TIGD3      | tigger transposable element derived 3                       | ENST00000309880 | 1,293088204         |
| A_33_P3297020 | NR_026816      | PSORS1C3   | psoriasis susceptibility 1 candidate 3 (non-protein coding) | ENST00000376242 | 1,291221093         |
| A_33_P3299160 | NR_033889      | LOC440131  | uncharacterized LOC440131                                   | ENST00000400540 | 1,248735323         |



|                |                   |                |                                                  |  |                 |             |
|----------------|-------------------|----------------|--------------------------------------------------|--|-----------------|-------------|
| A_21_P0013490  | TCONS_I2_0002778: | XLOC_I2_014217 |                                                  |  |                 | 1,24617695  |
| A_21_P0006741  | ENST00000446012   | XLOC_008762    |                                                  |  | ENST00000446012 | 1,207505053 |
| A_21_P0000392  | NR_003076         | SNORD98        | small nucleolar RNA, C/D box 98                  |  | ENST00000483264 | 1,207318292 |
| A_32_P221799   | NM_003514         | HIST1H2AM      | histone cluster 1, H2am                          |  | ENST00000359611 | 1,195064362 |
| A_21_P0002602  | TCONS_00004841    | XLOC_001564    |                                                  |  |                 | 1,185691954 |
| A_33_P3507384  | AK056398          | LOC152274      | uncharacterized LOC152274                        |  |                 | 1,181308117 |
| A_23_P407080   | NM_173489         | HEATR7B2       | HEAT repeat family member 7B2                    |  | ENST00000399564 | 1,1760931   |
| A_23_P108743   | NM_152381         | XIRP2          | xin actin-binding repeat containing 2            |  | ENST00000295237 | 1,172834251 |
| A_33_P3420259  | NR_003287         | RN28S1         | RNA, 28S ribosomal 1                             |  |                 | 1,148179723 |
| A_21_P0008136  | ENST00000420210   | XLOC_010556    |                                                  |  | ENST00000420210 | 1,141912986 |
| A_19_P00800316 | NR_033889         | LOC440131      | uncharacterized LOC440131                        |  | ENST00000400540 | 1,139827049 |
| A_33_P3710442  | AK021772          | FLJ11710       | uncharacterized protein FLJ11710                 |  |                 | 1,13869638  |
| A_23_P27649    | NM_001080411      | ZNF433         | zinc finger protein 433                          |  | ENST00000344980 | 1,135483192 |
| A_23_P216935   | NR_026677         | MIR600HG       | MIR600 host gene (non-protein coding)            |  | ENST00000545631 | 1,1273205   |
| A_19_P00322645 | XR_110237         | LOC283588      | uncharacterized LOC283588                        |  |                 | 1,127262508 |
| A_33_P3323463  | ENST00000532091   | HSPA8          | heat shock 70kDa protein 8                       |  | ENST00000532091 | 1,121011244 |
| A_33_P3336632  | NR_003287         | RN28S1         | RNA, 28S ribosomal 1                             |  |                 | 1,102879653 |
| A_21_P0000023  | NM_001159749      | RIOK2          | RIO kinase 2 (yeast)                             |  | ENST00000508447 | 1,086914303 |
| A_23_P74162    | NM_018134         | IQCC           | IQ motif containing C                            |  | ENST00000537469 | 1,08139873  |
| A_21_P0010928  | ENST00000429110   | XLOC_I2_001731 |                                                  |  | ENST00000429110 | 1,074810036 |
| A_21_P0000040  | NM_001164313      | ZBTB24         | zinc finger and BTB domain containing 24         |  |                 | 1,073604645 |
| A_33_P3325723  | NM_001822         | CHN1           | chimerin (chimaerin) 1                           |  | ENST00000492964 | 1,071955152 |
| A_23_P428129   | NM_000076         | CDKN1C         | cyclin-dependent kinase inhibitor 1C (p57, Kip2) |  | ENST00000313407 | 1,071069979 |
| A_24_P277673   | NM_003547         | HIST1H4G       | histone cluster 1, H4g                           |  | ENST00000244537 | 1,065751335 |
| A_23_P117261   | NM_130806         | RXFP2          | relaxin/insulin-like family peptide receptor 2   |  | ENST00000298386 | 1,059000966 |
| A_21_P0013568  | AK311573          | XLOC_I2_014802 |                                                  |  |                 | 1,05790555  |
| A_23_P105002   | NM_000327         | ROM1           | retinal outer segment membrane protein 1         |  | ENST00000278833 | 1,050033549 |
| A_21_P0005389  | THC2730801        | XLOC_006123    |                                                  |  |                 | 1,048387555 |
| A_23_P117261   | NM_130806         | RXFP2          | relaxin/insulin-like family peptide receptor 2   |  | ENST00000298386 | 1,041110431 |

|               |                 |                |                                                   |                 |  |             |
|---------------|-----------------|----------------|---------------------------------------------------|-----------------|--|-------------|
| A_21_P0008992 | TCONS_00024502  | XLOC_011821    |                                                   |                 |  | 1,039774308 |
| A_23_P398854  | NM_173660       | DOK7           | docking protein 7                                 | ENST00000515886 |  | 1,037806687 |
| A_33_P3388061 | NM_181617       | KRTAP21-2      | keratin associated protein 21-2                   | ENST00000333892 |  | 1,030545122 |
| A_24_P274615  | NM_020801       | ARRDC3         | arrestin domain containing 3                      | ENST00000265138 |  | 1,027517515 |
| A_33_P3404989 | NM_003536       | HIST1H3H       | histone cluster 1, H3h                            | ENST00000369163 |  | 1,025176558 |
| A_32_P205944  | NM_005054       | RGPD5          | RANBP2-like and GRIP domain containing 5          | ENST00000302558 |  | 1,024601646 |
| A_21_P0011393 | ENST00000507787 | XLOC_I2_004594 |                                                   | ENST00000507787 |  | 1,02191132  |
| A_21_P0000514 | NR_026704       | VTRNA1-2       | vault RNA 1-2                                     |                 |  | 1,018678146 |
| A_23_P69537   | NM_006681       | NMU            | neuromedin U                                      | ENST00000541393 |  | 1,016985755 |
| A_24_P348203  | NM_025061       | LRRRC8E        | leucine rich repeat containing 8 family, member E | ENST00000306708 |  | 1,015068567 |
| A_21_P0005232 | ENST00000440455 | XLOC_006093    |                                                   | ENST00000440455 |  | 1,012937247 |
| A_33_P3247838 | NM_001136501    | ZNF844         | zinc finger protein 844                           | ENST00000439326 |  | 1,011447619 |
| A_21_P0004259 | ENST00000520762 | XLOC_004412    |                                                   | ENST00000520762 |  | 1,008817416 |
| A_33_P3332348 | NR_002715       | RN7SL1         | RNA, 7SL, cytoplasmic 1                           | ENST00000553637 |  | 1,005842455 |
| A_21_P0000247 | NR_002443       | SNORD18C       | small nucleolar RNA, C/D box 18C                  |                 |  | 1,004967463 |
| A_21_P0005397 | TCONS_00013523  | XLOC_006163    |                                                   |                 |  | 1,000651279 |
| A_33_P3271121 | ENST00000484097 | SH3BP4         | SH3-domain binding protein 4                      | ENST00000484097 |  | 0,99850279  |
| A_33_P3242923 | NR_038358       | LOC283553      | uncharacterized LOC283553                         | ENST00000554409 |  | 0,991213951 |
| A_33_P3275381 | NM_001039580    | MAP9           | microtubule-associated protein 9                  | ENST00000393836 |  | 0,98974608  |
| A_33_P3229335 | NM_175055       | HIST3H2BB      | histone cluster 3, H2bb                           | ENST00000369160 |  | 0,988461102 |
| A_24_P67898   | ENST00000370094 | MGEA5          | meningioma expressed antigen 5 (hyaluronidase)    | ENST00000370094 |  | 0,983479087 |
| A_21_P0000197 | NM_021064       | HIST1H2AG      | histone cluster 1, H2ag                           | ENST00000359193 |  | 0,979301124 |
| A_33_P3270793 | NM_145175       | FAM84A         | family with sequence similarity 84, member A      | ENST00000359969 |  | 0,976907746 |
| A_23_P117261  | NM_130806       | RXFP2          | relaxin/insulin-like family peptide receptor 2    | ENST00000298386 |  | 0,963995383 |
| A_23_P374689  | NM_000817       | GAD1           | glutamate decarboxylase 1 (brain, 67kDa)          | ENST00000478562 |  | 0,963791441 |
| A_23_P48698   | NM_003814       | ADAM20         | ADAM metallopeptidase domain 20                   | ENST00000256389 |  | 0,961010956 |
| A_23_P93602   | NM_001010905    | C6orf58        | chromosome 6 open reading frame 58                | ENST00000329722 |  | 0,957422706 |
| A_33_P3396831 | ENST00000368256 | CCT3           | chaperonin containing TCP1, subunit 3 (gamma)     | ENST00000368256 |  | 0,954154645 |
| A_33_P3305203 | XR_110237       | LOC283588      | uncharacterized LOC283588                         |                 |  | 0,950137843 |

|                |                  |                |                                                         |                 |             |
|----------------|------------------|----------------|---------------------------------------------------------|-----------------|-------------|
| A_24_P85942    | NM_181453        | GCC2           | GRIP and coiled-coil domain containing 2                | ENST00000309863 | 0,949315267 |
| A_24_P921327   | ENST00000505317  | TAPT1          | transmembrane anterior posterior transformation 1       | ENST00000505317 | 0,949010643 |
| A_23_P415411   | NM_003545        | HIST1H4E       | histone cluster 1, H4e                                  | ENST00000360441 | 0,948692995 |
| A_21_P0009088  | TCONS_00024776   | XLOC_012051    |                                                         |                 | 0,948616424 |
| A_33_P3327519  | NR_002915        | SNORA74A       | small nucleolar RNA, H/ACA box 74A                      |                 | 0,934007246 |
| A_33_P3389394  | NR_002312        | RPPH1          | ribonuclease P RNA component H1                         | ENST00000554988 | 0,933908748 |
| A_33_P3363120  | NR_004387        | SCARNA10       | small Cajal body-specific RNA 10                        |                 | 0,933543276 |
| A_21_P0010437  | TCONS_00029688   | XLOC_014356    |                                                         |                 | 0,928909439 |
| A_33_P3291614  | XR_110031        | LOC100133039   | uncharacterized LOC100133039                            |                 | 0,927753235 |
| A_33_P3229246  | NM_003528        | HIST2H2BE      | histone cluster 2, H2be                                 | ENST00000369155 | 0,917957897 |
| A_23_P116249   | NM_014619        | GRIK4          | glutamate receptor, ionotropic, kainate 4               | ENST00000527524 | 0,91789909  |
| A_23_P108404   | NM_001037131     | AGAP1          | ArfGAP with GTPase domain, ankyrin repeat and PH domain | ENST00000304032 | 0,917393392 |
| A_33_P3310189  | NM_000684        | ADRB1          | adrenergic, beta-1-, receptor                           | ENST00000369295 | 0,911506809 |
| A_23_P415643   | NM_152652        | ZNF48          | zinc finger protein 48                                  | ENST00000320159 | 0,910789136 |
| A_23_P207774   | NM_014238        | KSR1           | kinase suppressor of ras 1                              | ENST00000398982 | 0,910139914 |
| A_21_P0000338  | NR_002984        | SNORA56        | small nucleolar RNA, H/ACA box 56                       | ENST00000481062 | 0,909014863 |
| A_21_P0003240  | TCONS_00006120   | XLOC_002725    |                                                         |                 | 0,906708823 |
| A_33_P3221432  | NM_001037813     | ZNF284         | zinc finger protein 284                                 | ENST00000421176 | 0,906192212 |
| A_33_P3386671  | NM_005060        | RORC           | RAR-related orphan receptor C                           | ENST00000356728 | 0,905707285 |
| A_21_P0000487  | NR_004378        | SNORD94        | small nucleolar RNA, C/D box 94                         |                 | 0,905205484 |
| A_23_P90062    | NM_006145        | DNAJB1         | DnaJ (Hsp40) homolog, subfamily B, member 1             | ENST00000254322 | 0,902166894 |
| A_23_P335495   | NM_001001891     | ANO7           | anoctamin 7                                             | ENST00000487192 | 0,902129553 |
| A_33_P3266719  | NM_017628        | TET2           | tet methylcytosine dioxygenase 2                        | ENST00000535110 | 0,899578628 |
| A_24_P608302   | BC012894         | LOC388796      | uncharacterized LOC388796                               |                 | 0,896254367 |
| A_21_P0000584  | NR_030583        | VTRNA2-1       | vault RNA 2-1                                           |                 | 0,893310065 |
| A_19_P00317318 | NM_001145664     | RFX8           |                                                         | ENST00000540519 | 0,890687038 |
| A_21_P0000387  | NR_003071        | SNORD90        | small nucleolar RNA, C/D box 90                         |                 | 0,8893527   |
| A_21_P0000708  | NR_037933        | C14orf55       | metalloproteinase-disintegrin 1-2 pseudogene            | ENST00000556964 | 0,88697123  |
| A_21_P0011290  | TCONS_I2_0000841 | XLOC_I2_004563 |                                                         |                 | 0,884221999 |

|               |                 |              |                                                                    |                 |             |
|---------------|-----------------|--------------|--------------------------------------------------------------------|-----------------|-------------|
| A_33_P3227551 | ENST00000509069 | ZNF331       | zinc finger protein 331                                            | ENST00000509069 | 0,884170658 |
| A_24_P55148   | NM_021058       | HIST1H2BJ    | histone cluster 1, H2bj                                            | ENST00000339812 | 0,882854985 |
| A_21_P0014563 | XR_110312       | LOC100505675 | uncharacterized LOC100505675                                       |                 | 0,879837443 |
| A_33_P3415430 | NM_005346       | HSPA1B       | heat shock 70kDa protein 1B                                        | ENST00000391548 | 0,878383614 |
| A_33_P3641427 | NM_016132       | MYEF2        | myelin expression factor 2                                         | ENST00000324324 | 0,876311629 |
| A_23_P341700  | NM_001007101    | ZNF484       | zinc finger protein 484                                            | ENST00000375495 | 0,875576417 |
| A_23_P92672   | NM_002538       | OCLN         | occludin                                                           | ENST00000514370 | 0,874759383 |
| A_33_P3286953 | NM_197941       | ADAMTS6      | ADAM metallopeptidase with thrombospondin type 1 motif             | ENST00000381052 | 0,873752577 |
| A_33_P3278392 | BX538347        | NFU1         | NFU1 iron-sulfur cluster scaffold homolog ( <i>S. cerevisiae</i> ) |                 | 0,869677471 |
| A_21_P0010340 | ENST00000442403 | XLOC_014139  |                                                                    | ENST00000442403 | 0,869375035 |
| A_23_P49988   | NM_033062       | KRTAP4-2     | keratin associated protein 4-2                                     | ENST00000377726 | 0,859477098 |
| A_21_P0000414 | NR_003210       | SNORD114-17  | small nucleolar RNA, C/D box 114-17                                |                 | 0,859379843 |
| A_21_P0000380 | NR_003057       | SNORD69      | small nucleolar RNA, C/D box 69                                    |                 | 0,858886498 |
| A_33_P3212909 | NM_033400       | ZFHX2        | zinc finger homeobox 2                                             | ENST00000382785 | 0,856180283 |
| A_23_P117261  | NM_130806       | RXFP2        | relaxin/insulin-like family peptide receptor 2                     | ENST00000298386 | 0,855156862 |
| A_21_P0013834 | NM_001017417    | CT45A1       | cancer/testis antigen family 45, member A1                         | ENST00000495729 | 0,85481     |
| A_33_P3283213 | NR_027295       | MGC57346     | uncharacterized LOC401884                                          | ENST00000455565 | 0,853786954 |
| A_24_P365322  | NM_152601       | ZNF709       | zinc finger protein 709                                            | ENST00000397732 | 0,853573005 |
| A_21_P0010235 | TCONS_00029002  | XLOC_013917  |                                                                    |                 | 0,853136879 |
| A_21_P0000515 | NR_026705       | VTRNA1-3     | vault RNA 1-3                                                      |                 | 0,852647769 |
| A_33_P3290949 | ENST00000487043 | PTCD3        | Pentatricopeptide repeat domain 3                                  | ENST00000487043 | 0,851897901 |
| A_32_P90483   | NM_178509       | STXBP4       | syntaxin binding protein 4                                         | ENST00000376352 | 0,848125938 |
| A_33_P3307144 | NM_021956       | GRIK2        | glutamate receptor, ionotropic, kainate 2                          | ENST00000487161 | 0,847965738 |
| A_21_P0004308 | TCONS_00010118  | XLOC_004584  |                                                                    |                 | 0,845996124 |
| A_33_P3392807 | ENST00000490432 | TAF1B        | TATA box binding protein (TBP)-associated factor, RNA poly         | ENST00000490432 | 0,84568971  |
| A_24_P924836  | BC022827        | CRYZL1       | crystallin, zeta (quinone reductase)-like 1                        | ENST00000399442 | 0,845252423 |
| A_32_P197825  | NM_001032392    | PLGLB1       | plasminogen-like B1                                                | ENST00000482249 | 0,845117749 |
| A_23_P423074  | NM_015566       | FAM169A      | family with sequence similarity 169, member A                      | ENST00000510609 | 0,842966985 |
| A_33_P3412468 | NM_004277       | SLC25A27     | solute carrier family 25, member 27                                | ENST00000371347 | 0,83969206  |

|               |                  |                |                                                              |                 |             |
|---------------|------------------|----------------|--------------------------------------------------------------|-----------------|-------------|
| A_24_P298495  | AF289590         | LOC100130744   | uncharacterized LOC100130744                                 |                 | 0,833947729 |
| A_21_P0000246 | NR_002442        | SNORD18B       | small nucleolar RNA, C/D box 18B                             |                 | 0,833561076 |
| A_23_P55388   | NM_018143        | KLHL11         | kelch-like 11 (Drosophila)                                   | ENST00000540254 | 0,832922894 |
| A_21_P0002417 | TCONS_00004194   | XLOC_002041    |                                                              |                 | 0,829813592 |
| A_33_P3281532 | NM_022780        | RMND5A         | required for meiotic nuclear division 5 homolog A (S. cerevi | ENST00000283632 | 0,829622257 |
| A_33_P3232354 | NM_183242        | BTBD8          | BTB (POZ) domain containing 8                                | ENST00000540648 | 0,827521273 |
| A_33_P3252730 | NR_027049        | ZNF788         | zinc finger family member 788                                | ENST00000339302 | 0,827421016 |
| A_23_P126836  | NM_003326        | TNFSF4         | tumor necrosis factor (ligand) superfamily, member 4         | ENST00000281834 | 0,826796691 |
| A_33_P3264667 | NM_183374        | CYP26C1        | cytochrome P450, family 26, subfamily C, polypeptide 1       | ENST00000285949 | 0,825573968 |
| A_33_P3356035 | ENST00000440812  | SMG7           | smg-7 homolog, nonsense mediated mRNA decay factor (C.       | ENST00000440812 | 0,825130274 |
| A_33_P3346688 | ENST00000527983  | HSPA8          | heat shock 70kDa protein 8                                   | ENST00000527983 | 0,82434566  |
| A_21_P0003604 | TCONS_00008057   | XLOC_003522    |                                                              |                 | 0,823856256 |
| A_33_P3269203 | NM_001207014     | SERPINH1       | serpin peptidase inhibitor, clade H (heat shock protein 47), | ENST00000524558 | 0,822704567 |
| A_24_P223384  | NM_003513        | HIST1H2AB      | histone cluster 1, H2ab                                      | ENST00000259791 | 0,822249806 |
| A_21_P0000279 | NR_002735        | SNORD61        | small nucleolar RNA, C/D box 61                              |                 | 0,820063883 |
| A_33_P3219745 | ENST00000368681  | ILF2           | interleukin enhancer binding factor 2, 45kDa                 | ENST00000368681 | 0,816874398 |
| A_33_P3671291 | AA378382         | SNORA12        | small nucleolar RNA, H/ACA box 12                            |                 | 0,81595012  |
| A_21_P0009632 | TCONS_00026722   | XLOC_012857    |                                                              |                 | 0,813031079 |
| A_21_P0001196 | ENST00000421851  | XLOC_001095    |                                                              | ENST00000421851 | 0,812219055 |
| A_23_P500998  | NM_152739        | HOXA9          | homeobox A9                                                  | ENST00000242050 | 0,810870147 |
| A_21_P0010636 | TCONS_l2_0000139 | XLOC_l2_001011 |                                                              |                 | 0,810709712 |
| A_33_P3385983 | NM_021143        | ZNF20          | zinc finger protein 20                                       | ENST00000292241 | 0,810399634 |
| A_23_P211056  | NM_013329        | GCFC1          | GC-rich sequence DNA-binding factor 1                        | ENST00000497873 | 0,809365864 |
| A_33_P3390758 | NM_153201        | HSPA8          | heat shock 70kDa protein 8                                   | ENST00000453788 | 0,808567336 |
| A_33_P3349252 | AL512723         | DKFZP547L112   | uncharacterized protein DKFZp547L112                         |                 | 0,808200229 |
| A_33_P3400699 | NM_206883        | SLC26A5        | solute carrier family 26, member 5 (prestin)                 | ENST00000339444 | 0,807517068 |
| A_23_P167882  | NM_052872        | IL17F          | interleukin 17F                                              | ENST00000478427 | 0,807359081 |
| A_33_P3295749 | ENST00000378689  | GLIPR1L2       | GLI pathogenesis-related 1 like 2                            | ENST00000378689 | 0,807126902 |
| A_23_P36018   | NM_014312        | VSIG2          | V-set and immunoglobulin domain containing 2                 | ENST00000326621 | 0,806638398 |



|               |                 |                |                                                |                 |             |
|---------------|-----------------|----------------|------------------------------------------------|-----------------|-------------|
| A_23_P411723  | NM_002655       | PLAG1          | pleiomorphic adenoma gene 1                    | ENST00000316981 | 0,806591681 |
| A_21_P0002514 | BI765130        | XLOC_002360    |                                                |                 | 0,806325671 |
| A_21_P0000037 | NM_001163391    | ZSCAN12        | zinc finger and SCAN domain containing 12      |                 | 0,806258136 |
| A_33_P3382856 | NM_133507       | DCN            | decorin                                        | ENST00000456569 | 0,801448476 |
| A_24_P177568  | NM_133473       | ZNF431         | zinc finger protein 431                        | ENST00000311048 | 0,799561418 |
| A_23_P114349  | NM_130776       | XAGE3          | X antigen family, member 3                     | ENST00000346279 | 0,799413756 |
| A_23_P92860   | NM_021147       | CCNO           | cyclin O                                       | ENST00000501463 | 0,795465123 |
| A_23_P111919  | NM_013357       | PURG           | purine-rich element binding protein G          | ENST00000475541 | 0,794553711 |
| A_21_P0001004 | ENST00000448680 | XLOC_000357    |                                                | ENST00000448680 | 0,792718043 |
| A_33_P3348752 | NM_006644       | HSPH1          | heat shock 105kDa/110kDa protein 1             | ENST00000380363 | 0,791338029 |
| A_23_P117261  | NM_130806       | RXFP2          | relaxin/insulin-like family peptide receptor 2 | ENST00000298386 | 0,788875245 |
| A_21_P0002860 | ENST00000465795 | XLOC_003166    |                                                | ENST00000465795 | 0,786763273 |
| A_21_P0010779 | ENST00000441085 | XLOC_l2_001138 |                                                | ENST00000441085 | 0,783098683 |
| A_33_P3237110 | NM_001099652    | GPR137C        | G protein-coupled receptor 137C                | ENST00000555369 | 0,782438798 |
| A_33_P3402823 | NM_001010862    | SPIN3          | spindlin family, member 3                      | ENST00000374915 | 0,782204229 |
| A_33_P3397323 | NM_152355       | ZNF441         | zinc finger protein 441                        | ENST00000357901 | 0,781823167 |
| A_33_P3209816 | NM_207325       | DPY19L3        | dpy-19-like 3 (C. elegans)                     | ENST00000392248 | 0,781652777 |
| A_23_P88119   | NM_006644       | HSPH1          | heat shock 105kDa/110kDa protein 1             | ENST00000320027 | 0,781160319 |
| A_21_P0000371 | NR_003037       | SNORD7         | small nucleolar RNA, C/D box 7                 |                 | 0,780709988 |
| A_33_P3277753 | NM_144994       | ANKRD23        | ankyrin repeat domain 23                       | ENST00000331001 | 0,78065306  |
| A_21_P0001556 | THC2764105      | XLOC_000939    |                                                |                 | 0,779122889 |
| A_33_P3403254 | NM_001080404    | ZNF878         | zinc finger protein 878                        | ENST00000440730 | 0,778872048 |
| A_33_P3299421 | NM_020880       | ZNF530         | zinc finger protein 530                        | ENST00000332854 | 0,778013219 |
| A_21_P0003698 | TCONS_00008376  | XLOC_003829    |                                                |                 | 0,777574106 |
| A_23_P101683  | NM_001828       | CLC            | Charcot-Leyden crystal protein                 | ENST00000221804 | 0,777454884 |
| A_21_P0012911 | XM_003403424    | LOC100652810   | beta-glucuronidase-like protein SMA5-like      |                 | 0,776938288 |
| A_32_P886589  | NM_175895       | C12orf61       | chromosome 12 open reading frame 61            | ENST00000408887 | 0,776557128 |
| A_32_P226205  | NM_033400       | ZFHX2          | zinc finger homeobox 2                         |                 | 0,776218281 |
| A_33_P3263392 | AK126149        | LOC729696      | uncharacterized LOC729696                      |                 | 0,775598474 |

|                |                 |                |                                                                   |                 |             |
|----------------|-----------------|----------------|-------------------------------------------------------------------|-----------------|-------------|
| A_33_P3416127  | AK093799        | LOC100132800   | uncharacterized LOC100132800                                      |                 | 0,775067948 |
| A_24_P166407   | NM_003544       | HIST1H4B       | histone cluster 1, H4b                                            | ENST00000377364 | 0,773367107 |
| A_23_P123108   | ENST00000493453 | AKAP9          | A kinase (PRKA) anchor protein (yotiao) 9                         | ENST00000493453 | 0,773021125 |
| A_21_P0008484  | ENST00000502187 | XLOC_011117    |                                                                   | ENST00000502187 | 0,772423641 |
| A_33_P3265714  | NM_173649       | C2orf61        | chromosome 2 open reading frame 61                                |                 | 0,770153323 |
| A_33_P3243307  | AK128353        | LOC100128281   | uncharacterized LOC100128281                                      |                 | 0,769765036 |
| A_33_P3245818  | ENST00000466449 | PQLC1          | PQ loop repeat containing 1                                       | ENST00000466449 | 0,768595231 |
| A_23_P254025   | NM_003408       | ZFP37          | zinc finger protein 37 homolog (mouse)                            | ENST00000555206 | 0,76759266  |
| A_23_P325625   | NM_173690       | SCAI           | suppressor of cancer cell invasion                                | ENST00000467917 | 0,767570809 |
| A_23_P67278    | NM_005815       | ZNF443         | zinc finger protein 443                                           | ENST00000411622 | 0,766311083 |
| A_33_P3389168  | ENST00000370393 | MTM1           | myotubularin 1                                                    | ENST00000370393 | 0,76408017  |
| A_23_P372860   | NM_003512       | HIST1H2AC      | histone cluster 1, H2ac                                           | ENST00000377791 | 0,761895123 |
| A_21_P0000459  | NR_003684       | SNORD119       | small nucleolar RNA, C/D box 119                                  |                 | 0,761132184 |
| A_23_P23102    | NM_145238       | ZSCAN20        | zinc finger and SCAN domain containing 20                         | ENST00000326544 | 0,760547561 |
| A_33_P3294031  | NR_002728       | KCNQ1OT1       | KCNQ1 opposite strand/antisense transcript 1 (non-protein coding) |                 | 0,760219507 |
| A_21_P0013439  | ENST00000412091 | XLOC_I2_013873 |                                                                   | ENST00000412091 | 0,758817093 |
| A_23_P155765   | NM_002129       | HMGB2          | high mobility group box 2                                         | ENST00000511316 | 0,757708142 |
| A_23_P410625   | NM_153695       | ZNF367         | zinc finger protein 367                                           | ENST00000375256 | 0,757466608 |
| A_23_P344281   | NM_001010879    | ZIK1           | zinc finger protein interacting with K protein 1 homolog (mouse)  | ENST00000307468 | 0,757298547 |
| A_21_P0000283  | NR_002741       | SNORD53        | small nucleolar RNA, C/D box 53                                   |                 | 0,756430694 |
| A_33_P3364185  | ENST00000370947 | RBMX2          | RNA binding motif protein, X-linked 2                             | ENST00000370947 | 0,756274747 |
| A_23_P412389   | NM_003862       | FGF18          | fibroblast growth factor 18                                       | ENST00000274625 | 0,755344086 |
| A_21_P0009965  | THC2638461      | XLOC_013549    |                                                                   |                 | 0,754459548 |
| A_21_P0010755  | NM_022064       | RNF123         | ring finger protein 123                                           | ENST00000443204 | 0,753586684 |
| A_21_P0007465  | TCONS_00020094  | XLOC_009485    |                                                                   |                 | 0,753093513 |
| A_33_P3299781  | ENST00000380201 | DDRKG1         | DDRKG domain containing 1                                         | ENST00000380201 | 0,752248383 |
| A_23_P101476   | NM_030824       | ZNF442         | zinc finger protein 442                                           | ENST00000242804 | 0,749840683 |
| A_19_P00323103 | ENST00000485597 | XLOC_001775    |                                                                   | ENST00000485597 | 0,749318765 |
| A_23_P34877    | NM_022768       | RBM15          | RNA binding motif protein 15                                      | ENST00000487146 | 0,74780537  |

|               |                  |                |                                                          |                 |             |
|---------------|------------------|----------------|----------------------------------------------------------|-----------------|-------------|
| A_21_P0000297 | NR_002914        | SNORD62A       | small nucleolar RNA, C/D box 62A                         | ENST00000426867 | 0,746972576 |
| A_23_P16652   | NM_152791        | ZNF555         | zinc finger protein 555                                  | ENST00000334241 | 0,746758822 |
| A_21_P0000206 | NR_000006        | SNORD21        | small nucleolar RNA, C/D box 21                          | ENST00000497519 | 0,746328666 |
| A_24_P93736   | NR_024341        | FLJ40292       | uncharacterized LOC643210                                |                 | 0,74577145  |
| A_24_P243749  | NM_002612        | PDK4           | pyruvate dehydrogenase kinase, isozyme 4                 | ENST00000542888 | 0,745604865 |
| A_23_P16242   | NM_021143        | ZNF20          | zinc finger protein 20                                   | ENST00000430024 | 0,745037501 |
| A_33_P3359763 | ENST00000466317  | FLCN           | folliculin                                               | ENST00000466317 | 0,743982953 |
| A_23_P369328  | NM_145306        | C10orf35       | chromosome 10 open reading frame 35                      | ENST00000373279 | 0,742832635 |
| A_23_P101476  | NM_030824        | ZNF442         | zinc finger protein 442                                  | ENST00000242804 | 0,742084069 |
| A_24_P380679  | NM_182597        | C7orf53        | chromosome 7 open reading frame 53                       | ENST00000312849 | 0,741954933 |
| A_21_P0007018 | DB228736         | XLOC_008955    |                                                          |                 | 0,740771063 |
| A_23_P316582  | NM_152355        | ZNF441         | zinc finger protein 441                                  | ENST00000454339 | 0,740256839 |
| A_33_P3270218 | ENST00000404008  | USP42          | ubiquitin specific peptidase 42                          | ENST00000404008 | 0,739501721 |
| A_21_P0000155 | NM_001204453     | PSMC2          | proteasome (prosome, macropain) 26S subunit, ATPase, 2   | ENST00000460021 | 0,739462013 |
| A_33_P3377459 | NM_001040284     | PAPD5          | PAP associated domain containing 5                       | ENST00000436909 | 0,738125822 |
| A_21_P0013659 | TCONS_I2_0002936 | XLOC_I2_015216 |                                                          |                 | 0,738115544 |
| A_21_P0000484 | NR_003942        | SNORD76        | small nucleolar RNA, C/D box 76                          |                 | 0,736064133 |
| A_33_P3264379 | NR_027049        | ZNF788         | zinc finger family member 788                            | ENST00000397759 | 0,735968796 |
| A_33_P3214665 | NM_002374        | MAP2           | microtubule-associated protein 2                         | ENST00000360351 | 0,735169393 |
| A_24_P50818   | NM_001206774     | GTF3C3         | general transcription factor IIIC, polypeptide 3, 102kDa | ENST00000409364 | 0,734893618 |
| A_21_P0002937 | TCONS_00005965   | XLOC_002597    |                                                          |                 | 0,734830642 |
| A_33_P3378935 | AB209007         | RBM14          | RNA binding motif protein 14                             | ENST00000409372 | 0,734298069 |
| A_21_P0000322 | NR_002968        | SNORA34        | small nucleolar RNA, H/ACA box 34                        |                 | 0,733647919 |
| A_33_P3688869 | NR_030728        | LOC440910      | uncharacterized LOC440910                                |                 | 0,733595152 |
| A_21_P0013877 | TCONS_I2_0003089 | XLOC_I2_015885 |                                                          |                 | 0,73284892  |
| A_23_P101476  | NM_030824        | ZNF442         | zinc finger protein 442                                  | ENST00000242804 | 0,732757483 |
| A_24_P80532   | NM_004354        | CCNG2          | cyclin G2                                                | ENST00000354403 | 0,73207051  |
| A_23_P301247  | NM_003517        | HIST2H2AC      | histone cluster 2, H2ac                                  | ENST00000331380 | 0,729607203 |
| A_23_P117261  | NM_130806        | RXFP2          | relaxin/insulin-like family peptide receptor 2           | ENST00000298386 | 0,729454957 |

|               |                 |                |                                                                   |                 |             |
|---------------|-----------------|----------------|-------------------------------------------------------------------|-----------------|-------------|
| A_21_P0003942 | ENST00000507389 | XLOC_005005    |                                                                   | ENST00000507389 | 0,728470666 |
| A_23_P4850    | NM_145233       | ZNF625         | zinc finger protein 625                                           | ENST00000439556 | 0,727863953 |
| A_23_P11390   | NM_004679       | VCY            | variable charge, Y-linked                                         | ENST00000250823 | 0,727546022 |
| A_24_P228149  | NM_002274       | KRT13          | keratin 13                                                        | ENST00000157775 | 0,727403263 |
| A_33_P3324383 | NM_001013690    | FIGNL2         | fidgetin-like 2                                                   |                 | 0,727185246 |
| A_33_P3474538 | NM_007138       | ZNF90          | zinc finger protein 90                                            |                 | 0,727084594 |
| A_23_P420692  | NM_015053       | PPFIA4         | protein tyrosine phosphatase, receptor type, f polypeptide        | ENST00000295706 | 0,726767935 |
| A_21_P0005255 | ENST00000446053 | XLOC_006220    |                                                                   | ENST00000446053 | 0,724905645 |
| A_33_P3275943 | NM_052927       | PWWP2A         | PWWP domain containing 2A                                         | ENST00000521424 | 0,724676552 |
| A_23_P86532   | ENST00000263103 | BICC1          | bicaudal C homolog 1 (Drosophila)                                 | ENST00000263103 | 0,724428118 |
| A_21_P0013664 | ENST00000423171 | XLOC_I2_015239 |                                                                   | ENST00000423171 | 0,724422806 |
| A_21_P0000381 | NR_003058       | SNORD70        | small nucleolar RNA, C/D box 70                                   |                 | 0,72434357  |
| A_33_P3262485 | NM_145276       | ZNF563         | zinc finger protein 563                                           | ENST00000293725 | 0,723957358 |
| A_33_P3351686 | NM_001114938    | CCDC17         | coiled-coil domain containing 17                                  | ENST00000479529 | 0,723692536 |
| A_24_P217234  | NM_000341       | SLC3A1         | solute carrier family 3 (cystine, dibasic and neutral amino acid) | ENST00000540334 | 0,723241023 |
| A_33_P3228773 | ENST00000400043 | CYYR1          | cysteine/tyrosine-rich 1                                          | ENST00000400043 | 0,720442773 |
| A_23_P8754    | NM_005763       | AASS           | aminoadipate-semialdehyde synthase                                | ENST00000358954 | 0,720015875 |
| A_33_P3394517 | NM_015092       | SMG1           | smg-1 homolog, phosphatidylinositol 3-kinase-related kinase       | ENST00000454049 | 0,719833784 |
| A_21_P0001840 | AL117577        | XLOC_001377    |                                                                   | ENST00000450628 | 0,718838672 |
| A_21_P0007352 | TCONS_00019635  | XLOC_009437    |                                                                   |                 | 0,718650893 |
| A_23_P389897  | NM_002507       | NGFR           | nerve growth factor receptor                                      | ENST00000172229 | 0,71808317  |
| A_21_P0012995 | AL049987        | XLOC_I2_012083 |                                                                   |                 | 0,718009755 |
| A_33_P3626709 | AK126613        | LOC100129280   | uncharacterized LOC100129280                                      |                 | 0,716073633 |
| A_33_P3311083 | AK097512        | PHLDB3         | pleckstrin homology-like domain, family B, member 3               |                 | 0,715867703 |
| A_21_P0003061 | ENST00000481679 | NAALADL2       | N-acetylated alpha-linked acidic dipeptidase-like 2               | ENST00000481679 | 0,715676888 |
| A_33_P3228642 | ENST00000322834 | ZNF584         | zinc finger protein 584                                           | ENST00000322834 | 0,713549861 |
| A_33_P3344277 | BC057389        | HS1BP3         | HCLS1 binding protein 3                                           | ENST00000402541 | 0,712424953 |
| A_24_P387321  | NM_016264       | ZNF44          | zinc finger protein 44                                            | ENST00000355684 | 0,711011179 |
| A_23_P354894  | NM_152603       | ZNF567         | zinc finger protein 567                                           | ENST00000360729 | 0,710587262 |

|               |                  |                |                                                          |                 |             |
|---------------|------------------|----------------|----------------------------------------------------------|-----------------|-------------|
| A_33_P3381022 | ENST00000362035  | ICMT           | isoprenylcysteine carboxyl methyltransferase             | ENST00000362035 | 0,710002377 |
| A_23_P61637   | NM_002108        | HAL            | histidine ammonia-lyase                                  | ENST00000546999 | 0,709313285 |
| A_33_P3211513 | NM_001162407     | CLK1           | CDC-like kinase 1                                        | ENST00000357369 | 0,708992897 |
| A_21_P0000216 | NR_000016        | SNORD36C       | small nucleolar RNA, C/D box 36C                         | ENST00000492798 | 0,708652326 |
| A_33_P3305770 | ENST00000389311  | NBR1           | neighbor of BRCA1 gene 1                                 | ENST00000389311 | 0,707938773 |
| A_33_P3305243 | ENST00000373903  | PSMD5          | proteasome (prosome, macropain) 26S subunit, non-ATPase  | ENST00000373903 | 0,707721613 |
| A_21_P0012993 | ENST00000447012  | XLOC_I2_012081 |                                                          | ENST00000447012 | 0,707691457 |
| A_23_P44648   | NM_030955        | ADAMTS12       | ADAM metallopeptidase with thrombospondin type 1 motif   | ENST00000352040 | 0,705743953 |
| A_23_P39263   | NM_173480        | ZNF57          | zinc finger protein 57                                   | ENST00000395204 | 0,705574449 |
| A_21_P0000264 | NR_002579        | SNORD74        | small nucleolar RNA, C/D box 74                          |                 | 0,70471844  |
| A_21_P0007483 | ENST00000539019  | SSPN           | sarcospan (Kras oncogene-associated gene)                | ENST00000539019 | 0,704530795 |
| A_23_P101476  | NM_030824        | ZNF442         | zinc finger protein 442                                  | ENST00000242804 | 0,703618133 |
| A_33_P3421183 | ENST00000473333  | GTF2I          | general transcription factor Iii                         | ENST00000473333 | 0,703554055 |
| A_21_P0013022 | TCONS_I2_0002419 | XLOC_I2_012518 |                                                          |                 | 0,702531297 |
| A_24_P194748  | NM_001080485     | ZNF275         | zinc finger protein 275                                  | ENST00000421401 | 0,70241908  |
| A_23_P101476  | NM_030824        | ZNF442         | zinc finger protein 442                                  | ENST00000242804 | 0,701940488 |
| A_21_P0013766 | TCONS_I2_0003022 | XLOC_I2_015536 |                                                          |                 | 0,70173985  |
| A_23_P138168  | NM_001839        | CNN3           | calponin 3, acidic                                       | ENST00000545882 | 0,701728115 |
| A_33_P3216357 | NM_001146702     | KDM5C          | lysine (K)-specific demethylase 5C                       | ENST00000349663 | 0,701331084 |
| A_33_P3325404 | NM_206922        | CRIP3          | cysteine-rich protein 3                                  | ENST00000274990 | 0,700931262 |
| A_23_P122068  | NM_181435        | C1QTNF3        | C1q and tumor necrosis factor related protein 3          | ENST00000513471 | 0,700680316 |
| A_33_P3302423 | NM_001142640     | TNRC6C         | trinucleotide repeat containing 6C                       | ENST00000335749 | 0,700410157 |
| A_33_P3549091 | NR_036551        | LOC100131347   | RAD52 motif 1 pseudogene                                 |                 | 0,700004006 |
| A_21_P0000730 | NR_038235        | LOC100507651   | uncharacterized LOC100507651                             |                 | 0,699802534 |
| A_21_P0000461 | NR_003686        | SNORD125       | small nucleolar RNA, C/D box 125                         |                 | 0,695948022 |
| A_33_P3354076 | NR_036433        | FAM172BP       | family with sequence similarity 172, member B pseudogene |                 | 0,695844103 |
| A_23_P101476  | NM_030824        | ZNF442         | zinc finger protein 442                                  | ENST00000242804 | 0,69566007  |
| A_23_P83149   | NM_016014        | FAM108B1       | family with sequence similarity 108, member B1           | ENST00000377041 | 0,695574985 |
| A_21_P0001195 | ENST00000436974  | XLOC_001093    |                                                          | ENST00000436974 | 0,695193862 |



|                |                  |                |                                                         |                 |             |
|----------------|------------------|----------------|---------------------------------------------------------|-----------------|-------------|
| A_33_P3400758  | NM_152791        | ZNF555         | zinc finger protein 555                                 | ENST00000382127 | 0,695120501 |
| A_33_P3356371  | AK127766         | LOC100133089   | uncharacterized LOC100133089                            |                 | 0,694985748 |
| A_19_P00315502 | ENST00000417112  | P01115         |                                                         | ENST00000417112 | 0,694841037 |
| A_21_P0012898  | TCONS_I2_0002283 | XLOC_I2_011987 |                                                         |                 | 0,694603719 |
| A_21_P0002473  | TCONS_00004332   | XLOC_002206    |                                                         |                 | 0,694043915 |
| A_23_P66719    | NM_144683        | DHRS13         | dehydrogenase/reductase (SDR family) member 13          | ENST00000426464 | 0,693771925 |
| A_23_P96590    | NM_014710        | GPRASP1        | G protein-coupled receptor associated sorting protein 1 | ENST00000361600 | 0,693745019 |
| A_33_P3274622  | NR_029401        | LOC731275      | uncharacterized LOC731275                               | ENST00000417964 | 0,692961622 |
| A_33_P3346327  | NR_003674        | KGFLP1         | fibroblast growth factor 7 pseudogene                   | ENST00000377614 | 0,692070054 |
| A_33_P3422010  | NM_178504        | DNAH12         | dynein, axonemal, heavy chain 12                        | ENST00000351747 | 0,692060948 |
| A_33_P3219601  | NM_007314        | ABL2           | v-abl Abelson murine leukemia viral oncogene homolog 2  | ENST00000504405 | 0,691765614 |
| A_21_P0013298  | NR_024271        | SEPT7P2        | septin 7 pseudogene 2                                   | ENST00000338231 | 0,691222416 |
| A_33_P3353622  | NM_021163        | RBAK           | RB-associated KRAB zinc finger                          | ENST00000353796 | 0,690523137 |
| A_23_P397455   | NM_145259        | ACVR1C         | activin A receptor, type IC                             | ENST00000243349 | 0,690447309 |
| A_23_P328766   | NM_145287        | ZNF519         | zinc finger protein 519                                 | ENST00000309305 | 0,689773775 |
| A_23_P218937   | NM_032402        | PCDHGC3        | protocadherin gamma subfamily C, 3                      | ENST00000308177 | 0,689530199 |
| A_21_P0000374  | NR_003046        | SNORD59B       | small nucleolar RNA, C/D box 59B                        |                 | 0,689453833 |
| A_21_P0014066  | XR_108328        | LOC100506636   | uncharacterized LOC100506636                            |                 | 0,689058848 |
| A_19_P00318272 | NR_038988        | LOC100287765   |                                                         |                 | 0,688855071 |
| A_21_P0012944  | NR_024054        | LOC100170939   | glucuronidase, beta pseudogene                          |                 | 0,688738052 |
| A_24_P91405    | NM_152601        | ZNF709         | zinc finger protein 709                                 | ENST00000397732 | 0,688664192 |
| A_33_P3265159  | BC110990         | GAPVD1         | GTPase activating protein and VPS9 domains 1            | ENST00000394084 | 0,68805023  |
| A_33_P3383065  | NM_001195150     | LOC100130705   | uncharacterized LOC100130705                            |                 | 0,686796417 |
| A_23_P164451   | NM_005994        | TBX2           | T-box 2                                                 | ENST00000477081 | 0,686347958 |
| A_33_P3264238  | NM_080764        | ZNF280B        | zinc finger protein 280B                                | ENST00000360412 | 0,686012326 |
| A_23_P157117   | NM_182898        | CREB5          | cAMP responsive element binding protein 5               | ENST00000409603 | 0,685892649 |
| A_23_P101476   | NM_030824        | ZNF442         | zinc finger protein 442                                 | ENST00000242804 | 0,685180843 |
| A_21_P0011487  | THC2630320       | XLOC_I2_005517 |                                                         |                 | 0,685180222 |
| A_21_P0000207  | NR_000007        | SNORD73A       | small nucleolar RNA, C/D box 73A                        | ENST00000322686 | 0,685095979 |

|                |                                 |              |                                                            |                 |             |
|----------------|---------------------------------|--------------|------------------------------------------------------------|-----------------|-------------|
| A_33_P3237517  | ENST00000369578                 | ZNF292       | zinc finger protein 292                                    | ENST00000369578 | 0,685012669 |
| A_33_P3261957  | NM_005795                       | CALCRL       | calcitonin receptor-like                                   | ENST00000410102 | 0,684120228 |
| A_21_P0010673  | TCONS_I2_0000180:XLOC_I2_001332 |              |                                                            |                 | 0,683908206 |
| A_33_P3312807  | NR_023915                       | IPW          | imprinted in Prader-Willi syndrome (non-protein coding)    | ENST00000549804 | 0,681254897 |
| A_21_P0014824  | NR_045370                       | LOC100505815 | uncharacterized LOC100505815                               |                 | 0,681019028 |
| A_33_P3413821  | AK090554                        | KIRREL       | kin of IRRE like (Drosophila)                              | ENST00000368172 | 0,679940611 |
| A_21_P0005322  | ENST00000485282                 | XLOC_006555  |                                                            | ENST00000485282 | 0,679836738 |
| A_33_P3460485  | BF814437                        | SCARNA4      | small Cajal body-specific RNA 4                            |                 | 0,6791375   |
| A_33_P3385870  | NM_004354                       | CCNG2        | cyclin G2                                                  | ENST00000316355 | 0,678488996 |
| A_32_P214665   | NM_001102566                    | PCP4L1       | Purkinje cell protein 4 like 1                             | ENST00000504449 | 0,678258749 |
| A_33_P3226630  | ENST00000467438                 | HS2ST1       | heparan sulfate 2-O-sulfotransferase 1                     | ENST00000467438 | 0,67815426  |
| A_21_P0007676  | TCONS_00020667                  | XLOC_009971  |                                                            |                 | 0,67809935  |
| A_21_P0000492  | NR_004384                       | SNAR-F       | small ILF3/NF90-associated RNA F                           |                 | 0,67797073  |
| A_33_P3253501  | NM_001161334                    | HIST2H2BF    | histone cluster 2, H2bf                                    | ENST00000369167 | 0,677952295 |
| A_24_P941188   | NM_015207                       | OTUD3        | OTU domain containing 3                                    | ENST00000375120 | 0,677570593 |
| A_24_P390909   | NM_181882                       | PRX          | periaxin                                                   | ENST00000341562 | 0,677153432 |
| A_32_P176550   | NM_152405                       | JMY          | junction mediating and regulatory protein, p53 cofactor    | ENST00000282259 | 0,676549499 |
| A_23_P303803   | NM_152474                       | C19orf18     | chromosome 19 open reading frame 18                        | ENST00000314391 | 0,675431695 |
| A_21_P0011910  | NM_012124                       | CHORDC1      | cysteine and histidine-rich domain (CHORD) containing 1    | ENST00000525317 | 0,674349053 |
| A_33_P3305058  | ENST00000451399                 | CUL9         | cullin 9                                                   | ENST00000451399 | 0,673531725 |
| A_32_P94       | NM_198560                       | LHFPL4       | lipoma HMGIC fusion partner-like 4                         |                 | 0,673510601 |
| A_24_P366607   | NM_203451                       | SERTM1       | serine-rich and transmembrane domain containing 1          | ENST00000315190 | 0,673103998 |
| A_23_P312358   | NM_152751                       | BEND7        | BEN domain containing 7                                    | ENST00000469555 | 0,672724463 |
| A_33_P3238455  | NR_034009                       | SRSF6        | serine/arginine-rich splicing factor 6                     | ENST00000483871 | 0,670926367 |
| A_21_P0011097  | TCONS_I2_0000629:XLOC_I2_003400 |              |                                                            |                 | 0,670306669 |
| A_23_P110319   | NM_025087                       | CWH43        | cell wall biogenesis 43 C-terminal homolog (S. cerevisiae) | ENST00000226432 | 0,669249893 |
| A_33_P3216133  | NM_024645                       | ZMAT4        | zinc finger, matrin-type 4                                 | ENST00000315769 | 0,668766738 |
| A_21_P0001050  | ENST00000417262                 | XLOC_000527  |                                                            | ENST00000417262 | 0,66876545  |
| A_19_P00805452 | TCONS_I2_0002039:XLOC_I2_010558 |              |                                                            |                 | 0,668546757 |

|               |                |              |                                                                     |                 |             |
|---------------|----------------|--------------|---------------------------------------------------------------------|-----------------|-------------|
| A_21_P0000751 | NR_038286      | LOC100507062 | uncharacterized LOC100507062                                        | ENST00000472046 | 0,66730381  |
| A_33_P3381328 | NR_027294      | FAM201A      | family with sequence similarity 201, member A                       | ENST00000484285 | 0,666702798 |
| A_21_P0006907 | TCONS_00018328 | XLOC_008608  |                                                                     |                 | 0,666693438 |
| A_21_P0000511 | NR_024342      | SNAR-H       | small ILF3/NF90-associated RNA H                                    |                 | 0,665456903 |
| A_23_P54100   | NM_001437      | ESR2         | estrogen receptor 2 (ER beta)                                       | ENST00000357782 | 0,663656732 |
| A_23_P101476  | NM_030824      | ZNF442       | zinc finger protein 442                                             | ENST00000242804 | 0,663530555 |
| A_23_P31444   | NM_014590      | ERVW-1       | endogenous retrovirus group W, member 1                             | ENST00000493463 | 0,662089494 |
| A_33_P3424462 | NM_001139459   | CNST         | consortin, connexin sorting protein                                 | ENST00000483271 | 0,661922183 |
| A_21_P0000087 | NM_001172574   | MCPH1        | microcephalin 1                                                     |                 | 0,661759315 |
| A_21_P0000761 | NR_038319      | LOC100505716 | uncharacterized LOC100505716                                        | ENST00000418963 | 0,659288527 |
| A_24_P120109  | NM_198963      | DHX57        | DEAH (Asp-Glu-Ala-Asp/His) box polypeptide 57                       | ENST00000355320 | 0,658960572 |
| A_21_P0005590 | TCONS_00014242 | XLOC_006319  |                                                                     |                 | 0,657497149 |
| A_23_P93258   | NM_003537      | HIST1H3B     | histone cluster 1, H3b                                              | ENST00000244661 | 0,656588501 |
| A_21_P0002461 | TCONS_00004313 | XLOC_002168  |                                                                     |                 | 0,655305196 |
| A_23_P320530  | NM_001010880   | ZNF780A      | zinc finger protein 780A                                            | ENST00000455521 | 0,653961521 |
| A_32_P109036  | NM_001076678   | ZNF493       | zinc finger protein 493                                             | ENST00000355504 | 0,653845103 |
| A_33_P3350259 | NM_001098524   | FAM129C      | family with sequence similarity 129, member C                       | ENST00000352727 | 0,653552516 |
| A_24_P101047  | NM_020931      | KIAA1586     | KIAA1586                                                            | ENST00000545356 | 0,652425855 |
| A_23_P167997  | NM_003518      | HIST1H2BG    | histone cluster 1, H2bg                                             | ENST00000244601 | 0,651999173 |
| A_33_P3502037 | NM_012124      | CHORDC1      | cysteine and histidine-rich domain (CHORD) containing 1             | ENST00000525317 | 0,6506906   |
| A_24_P68019   | NM_138347      | ZNF551       | zinc finger protein 551                                             | ENST00000282296 | 0,650687108 |
| A_33_P3233050 | AK124895       | SAMM50       | sorting and assembly machinery component 50 homolog (S. cerevisiae) |                 | 0,650359383 |
| A_21_P0000507 | NR_024230      | SNAR-B2      | small ILF3/NF90-associated RNA B2                                   |                 | 0,649296841 |
| A_33_P3232204 | XR_110259      | LOC100128343 | uncharacterized LOC100128343                                        |                 | 0,649131413 |
| A_33_P3214209 | NR_027027      | GUSBP1       | glucuronidase, beta pseudogene 1                                    | ENST00000508973 | 0,647790176 |
| A_21_P0000509 | NR_024244      | SNAR-G2      | small ILF3/NF90-associated RNA G2                                   |                 | 0,646805505 |
| A_23_P65208   | NM_001039650   | ZMYM5        | zinc finger, MYM-type 5                                             | ENST00000467542 | 0,646787733 |
| A_24_P340853  | NM_032789      | PARP10       | poly (ADP-ribose) polymerase family, member 10                      | ENST00000527262 | 0,646710103 |
| A_23_P109072  | NM_020436      | SALL4        | sal-like 4 (Drosophila)                                             | ENST00000371539 | 0,646305766 |

|                |                 |                |                                                          |                 |             |
|----------------|-----------------|----------------|----------------------------------------------------------|-----------------|-------------|
| A_33_P3287879  | NM_003536       | HIST1H3H       | histone cluster 1, H3h                                   | ENST00000369163 | 0,646217704 |
| A_23_P86386    | NM_024804       | ZNF669         | zinc finger protein 669                                  | ENST00000535105 | 0,645363277 |
| A_32_P64200    | NM_002098       | GUCA1B         | guanylate cyclase activator 1B (retina)                  |                 | 0,644744938 |
| A_32_P183218   | NM_153695       | ZNF367         | zinc finger protein 367                                  | ENST00000375256 | 0,644206859 |
| A_21_P0013128  | ENST00000412771 | XLOC_I2_012467 |                                                          | ENST00000412771 | 0,643877176 |
| A_23_P65797    | NM_022480       | KLHL25         | kelch-like 25 (Drosophila)                               | ENST00000337975 | 0,643832772 |
| A_21_P0014110  | ENST00000478301 | LOC100506673   |                                                          | ENST00000478301 | 0,643001758 |
| A_19_P00322440 | NR_036444       | LOC400550      | uncharacterized LOC400550                                |                 | 0,642873311 |
| A_21_P0007530  | TCONS_00020350  | XLOC_009681    |                                                          |                 | 0,642830873 |
| A_23_P322      | NM_182690       | EFNA4          | ephrin-A4                                                | ENST00000359751 | 0,642355404 |
| A_21_P0000508  | NR_024243       | SNAR-D         | small ILF3/NF90-associated RNA D                         |                 | 0,642161003 |
| A_23_P411922   | NM_001031698    | PRPF40B        | PRP40 pre-mRNA processing factor 40 homolog B (S. cerevi | ENST00000261897 | 0,640967932 |
| A_21_P0008921  | TCONS_00024367  | XLOC_011691    |                                                          |                 | 0,640285256 |
| A_23_P59045    | NM_021052       | HIST1H2AE      | histone cluster 1, H2ae                                  | ENST00000303910 | 0,639465123 |
| A_24_P237757   | AL136621        | ZMYM2          | zinc finger, MYM-type 2                                  | ENST00000382881 | 0,639424769 |
| A_23_P98830    | NM_017481       | UBQLN3         | ubiquilin 3                                              | ENST00000311659 | 0,638385298 |
| A_21_P0004619  | ENST00000414364 | XLOC_005927    |                                                          | ENST00000414364 | 0,637213686 |
| A_23_P102286   | NM_000233       | LHCGR          | luteinizing hormone/choriogonadotropin receptor          | ENST00000401907 | 0,636734907 |
| A_33_P3381393  | NM_001112704    | VAX1           | ventral anterior homeobox 1                              | ENST00000369206 | 0,635498139 |
| A_33_P3549874  | BC031230        | LOC255177      | uncharacterized LOC255177                                |                 | 0,634812725 |
| A_23_P45913    | NM_004814       | SNRNP40        | small nuclear ribonucleoprotein 40kDa (U5)               | ENST00000474025 | 0,634802121 |
| A_33_P3378126  | NM_058229       | FBXO32         | F-box protein 32                                         | ENST00000287396 | 0,6346166   |
| A_33_P3420020  | NM_001130858    | PPIP5K1        | diphosphoinositol pentakisphosphate kinase 1             | ENST00000335092 | 0,634434803 |
| A_23_P335981   | NM_173860       | HOXC12         | homeobox C12                                             | ENST00000243103 | 0,633924607 |
| A_24_P213715   | NR_026993       | LOC90834       | uncharacterized protein BC001742                         |                 | 0,633610182 |
| A_33_P3302632  | NM_003523       | HIST1H2BE      | histone cluster 1, H2be                                  |                 | 0,633008773 |
| A_23_P30799    | NM_021018       | HIST1H3F       | histone cluster 1, H3f                                   | ENST00000446824 | 0,631876965 |
| A_21_P0008876  | BC040927        | XLOC_011801    |                                                          |                 | 0,631710496 |
| A_23_P16817    | NM_004071       | CLK1           | CDC-like kinase 1                                        | ENST00000496205 | 0,631705795 |

|               |                 |              |                                                           |                 |             |
|---------------|-----------------|--------------|-----------------------------------------------------------|-----------------|-------------|
| A_33_P3210085 | NM_001047160    | NET1         | neuroepithelial cell transforming 1                       | ENST00000380337 | 0,631467533 |
| A_21_P0014898 | XR_132888       | LOC100652951 | uncharacterized LOC100652951                              |                 | 0,631151649 |
| A_23_P163209  | NM_020396       | BCL2L10      | BCL2-like 10 (apoptosis facilitator)                      | ENST00000260442 | 0,630317743 |
| A_23_P90320   | NM_013359       | ZNF221       | zinc finger protein 221                                   | ENST00000251269 | 0,630059152 |
| A_23_P108404  | NM_001037131    | AGAP1        | ArfGAP with GTPase domain, ankyrin repeat and PH domain   | ENST00000304032 | 0,629072685 |
| A_21_P0006524 | ENST00000440430 | XLOC_008110  |                                                           | ENST00000440430 | 0,629072518 |
| A_33_P3252068 | NM_030647       | JHDM1D       | jumonji C domain containing histone demethylase 1 homolog | ENST00000006967 | 0,629039942 |
| A_23_P117992  | NM_014861       | ATP2C2       | ATPase, Ca <sup>++</sup> transporting, type 2C, member 2  | ENST00000420010 | 0,628126549 |
| A_33_P3422085 | NM_001009615    | SPANXN2      | SPANX family, member N2                                   | ENST00000370498 | 0,628092721 |
| A_21_P0000377 | NR_003054       | SNORD65      | small nucleolar RNA, C/D box 65                           |                 | 0,627997587 |
| A_33_P3222307 | AK125520        | LOC100129380 | uncharacterized LOC100129380                              |                 | 0,627813507 |
| A_33_P3248424 | NM_138348       | FAM105B      | family with sequence similarity 105, member B             |                 | 0,627689922 |
| A_33_P3415336 | ENST00000462747 | ALS2         | amyotrophic lateral sclerosis 2 (juvenile)                | ENST00000462747 | 0,627350083 |
| A_24_P241057  | NM_016366       | CABP2        | calcium binding protein 2                                 | ENST00000545205 | 0,627182375 |
| A_33_P3416513 | NM_001040032    | C8orf74      | chromosome 8 open reading frame 74                        | ENST00000304519 | 0,627085028 |
| A_32_P218355  | NM_001164446    | C6orf132     | chromosome 6 open reading frame 132                       | ENST00000341865 | 0,626237737 |
| A_24_P113144  | NM_024857       | ATAD5        | ATPase family, AAA domain containing 5                    | ENST00000321990 | 0,625612757 |
| A_23_P302681  | NM_001042762    | FIGNL1       | fidgetin-like 1                                           | ENST00000419119 | 0,625168309 |
| A_33_P3212769 | BC020894        | LOC100132686 | uncharacterized LOC100132686                              |                 | 0,624983216 |
| A_33_P3221084 | ENST00000525443 | LTBP3        | latent transforming growth factor beta binding protein 3  | ENST00000525443 | 0,622977198 |
| A_33_P3424328 | ENST00000229824 | RAB44        | RAB44, member RAS oncogene family                         | ENST00000229824 | 0,622933543 |
| A_33_P3401262 | NM_001097611    | KNCN         | kinocilin                                                 | ENST00000396314 | 0,621764372 |
| A_33_P3587376 | NR_024214       | SNAR-A3      | small ILF3/NF90-associated RNA A3                         |                 | 0,621757653 |
| A_33_P3420496 | NR_003015       | SNORA53      | small nucleolar RNA, H/ACA box 53                         |                 | 0,621589741 |
| A_21_P0013918 | XM_001717195    | LOC731282    | uncharacterized LOC731282                                 |                 | 0,621364436 |
| A_23_P211064  | NM_013329       | GCFC1        | GC-rich sequence DNA-binding factor 1                     | ENST00000472588 | 0,620724872 |
| A_33_P3344599 | ENST00000377153 | UBE4B        | ubiquitination factor E4B                                 | ENST00000377153 | 0,620713962 |
| A_32_P790361  | NM_007138       | ZNF90        | zinc finger protein 90                                    | ENST00000473524 | 0,619315203 |
| A_33_P3380196 | BC015533        | AKAP9        | A kinase (PRKA) anchor protein (yotiao) 9                 | ENST00000394564 | 0,619304476 |



|                |                  |                |                                              |                 |             |
|----------------|------------------|----------------|----------------------------------------------|-----------------|-------------|
| A_33_P3229898  | ENST00000379805  | PDHA1          | pyruvate dehydrogenase (lipoamide) alpha 1   | ENST00000379805 | 0,619021435 |
| A_21_P0000243  | NR_002439        | SNORD43        | small nucleolar RNA, C/D box 43              | ENST00000453303 | 0,618488533 |
| A_23_P74737    | NM_001990        | EYA3           | eyes absent homolog 3 (Drosophila)           | ENST00000495923 | 0,618250454 |
| A_24_P65060    | NM_032246        | MEX3B          | mex-3 homolog B (C. elegans)                 | ENST00000329713 | 0,618032983 |
| A_21_P0014879  | ENST00000449197  | LOC100652735   |                                              | ENST00000449197 | 0,617822735 |
| A_21_P0004888  | TCONS_00011824   | XLOC_005310    |                                              |                 | 0,61753757  |
| A_32_P38637    | NM_032534        | KRBA1          | KRAB-A domain containing 1                   | ENST00000466546 | 0,615928068 |
| A_21_P0000447  | NR_003326        | SNORD116-11    | small nucleolar RNA, C/D box 116-11          |                 | 0,615523848 |
| A_32_P64475    | NM_152608        | C1orf55        | chromosome 1 open reading frame 55           | ENST00000366817 | 0,615301682 |
| A_19_P00807374 | TCONS_I2_0002039 | XLOC_I2_010558 |                                              |                 | 0,614914837 |
| A_23_P101476   | NM_030824        | ZNF442         | zinc finger protein 442                      | ENST00000242804 | 0,61450922  |
| A_23_P115161   | NM_002036        | DARC           | Duffy blood group, chemokine receptor        | ENST00000435307 | 0,61398185  |
| A_21_P0001551  | THC2675475       | XLOC_000922    |                                              |                 | 0,611677701 |
| A_33_P3395008  | NM_001142807     | ACOXL          | acyl-CoA oxidase-like                        | ENST00000439055 | 0,611400717 |
| A_21_P0000384  | NR_003066        | SNORD85        | small nucleolar RNA, C/D box 85              |                 | 0,611161486 |
| A_21_P0002502  | TCONS_00004440   | XLOC_002313    |                                              |                 | 0,611139325 |
| A_23_P63870    | NM_144660        | SAMD8          | sterile alpha motif domain containing 8      | ENST00000372690 | 0,61080671  |
| A_32_P139738   | NR_002827        | HERC2P4        | hect domain and RLD 2 pseudogene 4           |                 | 0,610372915 |
| A_21_P0013677  | NR_026868        | ANKRD19P       | ankyrin repeat domain 19, pseudogene         | ENST00000354752 | 0,610001479 |
| A_33_P3423700  | AK124002         | LOC100131829   | uncharacterized LOC100131829                 |                 | 0,609571228 |
| A_23_P377411   | AF130105         | LOC100133130   | PRO1102                                      |                 | 0,60941207  |
| A_21_P0001322  | TCONS_00000997   | XLOC_000263    |                                              |                 | 0,608154592 |
| A_21_P0011612  | NM_173628        | DNAH17         | dynein, axonemal, heavy chain 17             | ENST00000389840 | 0,608026769 |
| A_23_P102000   | NM_001008540     | CXCR4          | chemokine (C-X-C motif) receptor 4           | ENST00000241393 | 0,607425785 |
| A_21_P0000469  | NR_003694        | SNORD11B       | small nucleolar RNA, C/D box 11B             |                 | 0,607278128 |
| A_33_P3393684  | NM_001013661     | VSIG8          | V-set and immunoglobulin domain containing 8 | ENST00000368100 | 0,606550903 |
| A_33_P3318946  | NM_021817        | HAPLN2         | hyaluronan and proteoglycan link protein 2   | ENST00000255039 | 0,606401164 |
| A_32_P155460   | NR_024089        | LINC00162      | long intergenic non-protein coding RNA 162   | ENST00000422199 | 0,606399477 |
| A_23_P4628     | NM_025027        | ZNF606         | zinc finger protein 606                      | ENST00000341164 | 0,606169391 |

|               |                 |                |                                                            |                 |             |
|---------------|-----------------|----------------|------------------------------------------------------------|-----------------|-------------|
| A_21_P0001218 | ENST00000424696 | XLOC_001186    |                                                            | ENST00000424696 | 0,605838138 |
| A_23_P408167  | NM_001004051    | GPRASP2        | G protein-coupled receptor associated sorting protein 2    | ENST00000332262 | 0,605076867 |
| A_23_P410725  | NM_152356       | ZNF491         | zinc finger protein 491                                    | ENST00000323169 | 0,604795482 |
| A_33_P3217490 | NR_038388       | LOC729444      | uncharacterized LOC729444                                  | ENST00000415704 | 0,604152946 |
| A_23_P122068  | NM_181435       | C1QTNF3        | C1q and tumor necrosis factor related protein 3            | ENST00000513471 | 0,603978322 |
| A_21_P0000257 | NR_002563       | SNORD27        | small nucleolar RNA, C/D box 27                            |                 | 0,603804652 |
| A_23_P74981   | NM_033213       | ZNF670         | zinc finger protein 670                                    | ENST00000366503 | 0,603329589 |
| A_33_P3336240 | NR_024044       | DEFB109P1      | defensin, beta 109, pseudogene 1                           |                 | 0,60314027  |
| A_23_P360626  | NM_178836       | PLD6           | phospholipase D family, member 6                           | ENST00000321560 | 0,602577994 |
| A_21_P0007089 | ENST00000455566 | PPP2R2D        | protein phosphatase 2, regulatory subunit B, delta         | ENST00000455566 | 0,602328016 |
| A_23_P55880   | NM_144976       | ZNF564         | zinc finger protein 564                                    | ENST00000339282 | 0,602194661 |
| A_33_P3358943 | NM_000839       | GRM2           | glutamate receptor, metabotropic 2                         | ENST00000464585 | 0,60144594  |
| A_33_P3358163 | NM_018958       | C15orf2        | chromosome 15 open reading frame 2                         | ENST00000329468 | 0,601014066 |
| A_33_P3677298 | AL117431        | LOC152286      | uncharacterized LOC152286                                  |                 | 0,601002996 |
| A_33_P3255755 | AK123337        | CROCCP2        | ciliary rootlet coiled-coil, rootletin pseudogene 2        |                 | 0,60051773  |
| A_21_P0003179 | TCONS_00006667  | XLOC_003263    |                                                            |                 | 0,60032865  |
| A_21_P0014224 | XR_108920       | LOC100505760   | uncharacterized LOC100505760                               |                 | 0,600044675 |
| A_23_P102571  | NM_020062       | SLC2A4RG       | SLC2A4 regulator                                           | ENST00000266077 | 0,599954459 |
| A_33_P3888485 | NM_031938       | BCO2           | beta-carotene oxygenase 2                                  | ENST00000438022 | 0,599928073 |
| A_23_P405216  | NM_001145083    | ZNF619         | zinc finger protein 619                                    | ENST00000314686 | 0,598641196 |
| A_33_P3843358 | BG944179        | SNORD8         | small nucleolar RNA, C/D box 8                             |                 | 0,598630573 |
| A_21_P0011424 | THC2662045      | XLOC_I2_005179 |                                                            |                 | 0,598565669 |
| A_23_P424126  | NM_014594       | ZNF354C        | zinc finger protein 354C                                   | ENST00000315475 | 0,598403516 |
| A_21_P0007801 | THC2749949      | XLOC_010258    |                                                            |                 | 0,598293122 |
| A_21_P0013637 | CB121594        | XLOC_I2_015178 |                                                            |                 | 0,598174843 |
| A_21_P0008028 | TCONS_00021716  | XLOC_010301    |                                                            |                 | 0,598002232 |
| A_24_P375205  | ENST00000389126 | MKL2           | MKL/myocardin-like 2                                       | ENST00000389126 | 0,597601954 |
| A_33_P3344504 | ENST00000382938 | APBA2          | amyloid beta (A4) precursor protein-binding, family A, mem | ENST00000382938 | 0,597353979 |
| A_21_P0000239 | NR_002434       | SNORD101       | small nucleolar RNA, C/D box 101                           |                 | 0,597221858 |

|               |                                 |              |                                                             |                 |             |
|---------------|---------------------------------|--------------|-------------------------------------------------------------|-----------------|-------------|
| A_33_P3290443 | NR_002569                       | SCARNA9      | small Cajal body-specific RNA 9                             | ENST00000530422 | 0,596495994 |
| A_24_P71439   | NM_015317                       | PUM2         | pumilio homolog 2 (Drosophila)                              | ENST00000403432 | 0,596247991 |
| A_32_P182388  | NM_021217                       | ZNF77        | zinc finger protein 77                                      | ENST00000314531 | 0,595932515 |
| A_23_P106117  | NM_007374                       | SIX6         | SIX homeobox 6                                              | ENST00000327720 | 0,595733468 |
| A_21_P0011289 | TCONS_I2_0000841:XLOC_I2_004562 |              |                                                             |                 | 0,595671767 |
| A_33_P3299319 | NM_001136137                    | RPL28        | ribosomal protein L28                                       | ENST00000428193 | 0,595537416 |
| A_24_P932939  | NM_001008737                    | LOC401052    | uncharacterized LOC401052                                   | ENST00000420091 | 0,594974628 |
| A_23_P148600  | NR_024616                       | INE1         | inactivation escape 1 (non-protein coding)                  | ENST00000456273 | 0,594541518 |
| A_33_P3243028 | NM_014208                       | DSPP         | dentin sialophosphoprotein                                  | ENST00000282478 | 0,594534546 |
| A_32_P113114  | NM_152289                       | ZNF561       | zinc finger protein 561                                     | ENST00000354661 | 0,594073993 |
| A_21_P0007253 | TCONS_00019427                  | XLOC_009243  |                                                             |                 | 0,593916375 |
| A_23_P385126  | NM_139160                       | DEPDC7       | DEP domain containing 7                                     | ENST00000311388 | 0,593780708 |
| A_21_P0000512 | NR_024343                       | SNAR-I       | small ILF3/NF90-associated RNA I                            |                 | 0,593730746 |
| A_21_P0009462 | TCONS_00026292                  | XLOC_012636  |                                                             |                 | 0,59355574  |
| A_23_P102000  | NM_001008540                    | CXCR4        | chemokine (C-X-C motif) receptor 4                          | ENST00000241393 | 0,593266931 |
| A_24_P737939  | NM_001012974                    | C6orf154     | chromosome 6 open reading frame 154                         | ENST00000468319 | 0,592711585 |
| A_33_P3265479 | ENST00000522974                 | ZFAT         | zinc finger and AT hook domain containing                   | ENST00000522974 | 0,592606822 |
| A_23_P166823  | NM_003280                       | TNNC1        | troponin C type 1 (slow)                                    | ENST00000461086 | 0,592540838 |
| A_33_P3296289 | XR_132508                       | LOC100128508 | PP12100                                                     |                 | 0,592045913 |
| A_33_P3372674 | NR_026784                       | C6orf164     | chromosome 6 open reading frame 164                         | ENST00000369572 | 0,59012869  |
| A_33_P3267463 | ENST00000381984                 | RFX3         | regulatory factor X, 3 (influences HLA class II expression) | ENST00000381984 | 0,589915532 |
| A_33_P3382143 | NM_001243466                    | STARD13      | StAR-related lipid transfer (START) domain containing 13    | ENST00000399364 | 0,588911454 |
| A_24_P393958  | NM_007034                       | DNAJB4       | DnaJ (Hsp40) homolog, subfamily B, member 4                 | ENST00000370763 | 0,58819764  |
| A_23_P102000  | NM_001008540                    | CXCR4        | chemokine (C-X-C motif) receptor 4                          | ENST00000241393 | 0,588084617 |
| A_23_P102000  | NM_001008540                    | CXCR4        | chemokine (C-X-C motif) receptor 4                          | ENST00000241393 | 0,587732523 |
| A_23_P59714   | NR_026902                       | MGC16142     | uncharacterized protein MGC16142                            |                 | 0,587703025 |
| A_33_P3273767 | ENST00000442973                 | GJB7         | gap junction protein, beta 7, 25kDa                         | ENST00000442973 | 0,587650507 |
| A_23_P115861  | NM_145312                       | ZNF485       | zinc finger protein 485                                     | ENST00000374437 | 0,587440959 |
| A_33_P3490572 | NM_152491                       | PM20D1       | peptidase M20 domain containing 1                           | ENST00000460624 | 0,587216119 |

|                |                 |               |                                                           |                 |             |
|----------------|-----------------|---------------|-----------------------------------------------------------|-----------------|-------------|
| A_21_P0003369  | ENST00000508135 | XLOC_003549   |                                                           | ENST00000508135 | 0,587191444 |
| A_23_P208240   | ENST00000355147 | ZNF160        | zinc finger protein 160                                   | ENST00000355147 | 0,586038228 |
| A_23_P28953    | NM_175850       | DNMT3B        | DNA (cytosine-5-)-methyltransferase 3 beta                | ENST00000344505 | 0,585763423 |
| A_19_P00318561 | XR_108763       | LOC100506516  | uncharacterized LOC100506516                              | ENST00000414621 | 0,585721208 |
| A_24_P9321     | NM_003533       | HIST1H3I      | histone cluster 1, H3i                                    | ENST00000328488 | 0,585504001 |
| A_21_P0000298  | NR_002916       | SNORD8        | small nucleolar RNA, C/D box 8                            |                 | 0,584061644 |
| A_33_P3326588  | NM_003840       | TNFRSF10D     | tumor necrosis factor receptor superfamily, member 10d, d | ENST00000312584 | 0,583732932 |
| A_21_P0009107  | TCONS_00024861  | XLOC_011753   |                                                           |                 | 0,583573452 |
| A_21_P0009216  | TCONS_00025294  | XLOC_012099   |                                                           |                 | 0,58266763  |
| A_21_P0003098  | TCONS_00006402  | XLOC_003026   |                                                           |                 | 0,582205298 |
| A_33_P3222769  | NM_001013638    | PRR25         | proline rich 25                                           | ENST00000301698 | 0,582153395 |
| A_19_P00806490 | NM_030625       | TET1          | tet methylcytosine dioxygenase 1                          | ENST00000373644 | 0,581102176 |
| A_23_P203829   | NM_015394       | ZNF10         | zinc finger protein 10                                    | ENST00000426665 | 0,581044289 |
| A_23_P102000   | NM_001008540    | CXCR4         | chemokine (C-X-C motif) receptor 4                        | ENST00000241393 | 0,580606543 |
| A_21_P0002348  | TCONS_00004017  | XLOC_001856   |                                                           |                 | 0,58056557  |
| A_23_P90333    | NM_001033719    | ZNF404        | zinc finger protein 404                                   | ENST00000324394 | 0,58034063  |
| A_32_P161994   | NR_029448       | LOC255411     | uncharacterized LOC255411                                 | ENST00000548054 | 0,580183047 |
| A_23_P10206    | NM_005328       | HAS2          | hyaluronan synthase 2                                     | ENST00000303924 | 0,58018117  |
| A_33_P3368339  | NM_001045477    | FAM22G        | family with sequence similarity 22, member G              | ENST00000354649 | 0,580032407 |
| A_33_P3345796  | ENST00000368982 | SNX3          | sorting nexin 3                                           | ENST00000368982 | 0,579988446 |
| A_33_P3464855  | AL050097        | DKFZP586B0319 | DKFZP586B0319 protein                                     |                 | 0,57953409  |
| A_23_P142407   | NM_033204       | ZNF101        | zinc finger protein 101                                   | ENST00000444249 | 0,579509331 |
| A_24_P231829   | NM_017614       | BHMT2         | betaine--homocysteine S-methyltransferase 2               | ENST00000255192 | 0,578987563 |
| A_24_P146211   | NM_021063       | HIST1H2BD     | histone cluster 1, H2bd                                   | ENST00000377777 | 0,578767923 |
| A_23_P253484   | NM_016228       | AADAT         | aminoadipate aminotransferase                             | ENST00000353187 | 0,578763788 |
| A_32_P61480    | NR_026941       | CASC2         | cancer susceptibility candidate 2 (non-protein coding)    |                 | 0,57854023  |
| A_33_P3252588  | NR_024485       | LOC100130093  | uncharacterized LOC100130093                              | ENST00000480897 | 0,578472457 |
| A_21_P0003147  | DB095195        | XLOC_003201   |                                                           |                 | 0,578428098 |
| A_32_P178945   | NM_018566       | YOD1          | YOD1 OTU deubiquinating enzyme 1 homolog (S. cerevisiae)  | ENST00000367084 | 0,577614695 |

|                |                 |             |                                                                                    |                 |             |
|----------------|-----------------|-------------|------------------------------------------------------------------------------------|-----------------|-------------|
| A_23_P102000   | NM_001008540    | CXCR4       | chemokine (C-X-C motif) receptor 4                                                 | ENST00000241393 | 0,57753077  |
| A_23_P102000   | NM_001008540    | CXCR4       | chemokine (C-X-C motif) receptor 4                                                 | ENST00000241393 | 0,577486032 |
| A_33_P3262276  | NM_001005280    | OR10A7      | olfactory receptor, family 10, subfamily A, member 7                               | ENST00000326258 | 0,577455701 |
| A_23_P115805   | NM_001143764    | SYCE1       | synaptonemal complex central element protein 1                                     | ENST00000460441 | 0,577067316 |
| A_33_P3410232  | NR_024541       | LY6G6E      | lymphocyte antigen 6 complex, locus G6E (pseudogene)                               | ENST00000461287 | 0,577038914 |
| A_24_P206317   | NM_058176       | HDAC9       | histone deacetylase 9                                                              | ENST00000461159 | 0,576393759 |
| A_21_P0000444  | NR_003319       | SNORD116-4  | small nucleolar RNA, C/D box 116-4                                                 | ENST00000549804 | 0,576391139 |
| A_33_P3234138  | NR_036433       | FAM172BP    | family with sequence similarity 172, member B pseudogene                           |                 | 0,575553217 |
| A_33_P3299386  | NM_001039654    | ZNF550      | zinc finger protein 550                                                            | ENST00000506609 | 0,575526475 |
| A_33_P3349289  | NR_002222       | ARGFXP2     | arginine-fifty homeobox pseudogene 2                                               |                 | 0,575453237 |
| A_21_P0007998  | ENST00000423739 | XLOC_010633 |                                                                                    | ENST00000423739 | 0,575307014 |
| A_23_P102000   | NM_001008540    | CXCR4       | chemokine (C-X-C motif) receptor 4                                                 | ENST00000241393 | 0,575243303 |
| A_21_P0004645  | ENST00000451317 | XLOC_005263 |                                                                                    | ENST00000451317 | 0,574956901 |
| A_33_P3342830  | NM_173201       | ATP2A1      | ATPase, Ca <sup>++</sup> transporting, cardiac muscle, fast twitch 1               | ENST00000357084 | 0,574237753 |
| A_24_P363583   | NM_006076       | AGFG2       | ArfGAP with FG repeats 2                                                           | ENST00000300176 | 0,574180905 |
| A_24_P922919   | NM_001040649    | ACP1        | acid phosphatase 1, soluble                                                        | ENST00000407983 | 0,574096298 |
| A_21_P0001602  | THC2750242      | XLOC_001126 |                                                                                    |                 | 0,574005817 |
| A_33_P3300147  | NM_001001709    | C9orf170    | chromosome 9 open reading frame 170                                                |                 | 0,573917155 |
| A_33_P3269278  | NM_153257       | ZNF461      | zinc finger protein 461                                                            | ENST00000396896 | 0,573571767 |
| A_23_P102000   | NM_001008540    | CXCR4       | chemokine (C-X-C motif) receptor 4                                                 | ENST00000241393 | 0,573361159 |
| A_23_P16022    | NM_005773       | ZNF256      | zinc finger protein 256                                                            | ENST00000282308 | 0,573166189 |
| A_23_P140009   | NM_000452       | SLC10A2     | solute carrier family 10 (sodium/bile acid cotransporter family 10)                | ENST00000245312 | 0,572166782 |
| A_21_P0004761  | ENST00000430931 | XLOC_005771 |                                                                                    | ENST00000430931 | 0,57206812  |
| A_33_P3257703  | NM_203299       | C9orf131    | chromosome 9 open reading frame 131                                                | ENST00000435140 | 0,571837368 |
| A_33_P3279019  | NM_012397       | SERPINB13   | serpin peptidase inhibitor, clade B (ovalbumin), member 13                         | ENST00000269489 | 0,57180621  |
| A_33_P3227842  | NM_001166006    | EPB41       | erythrocyte membrane protein band 4.1 (elliptocytosis 1, RBC membrane protein 4.1) | ENST00000373797 | 0,571527603 |
| A_19_P00813085 | CN388809        | XLOC_011183 |                                                                                    |                 | 0,571086344 |
| A_23_P203115   | NM_032780       | TMEM25      | transmembrane protein 25                                                           | ENST00000533627 | 0,570389164 |
| A_33_P3676515  | NR_027292       | SSR4P1      | signal sequence receptor, delta pseudogene 1                                       |                 | 0,570155786 |



|                |                 |                |                                                               |                 |             |
|----------------|-----------------|----------------|---------------------------------------------------------------|-----------------|-------------|
| A_24_P393571   | NM_004293       | GDA            | guanine deaminase                                             | ENST00000358399 | 0,569458871 |
| A_23_P144476   | NM_199327       | SPRY1          | sprouty homolog 1, antagonist of FGF signaling (Drosophila)   | ENST00000339241 | 0,569351198 |
| A_21_P0010769  | NR_003366       | ANKRD20A8P     | ankyrin repeat domain 20 family, member A8, pseudogene        | ENST00000412204 | 0,569347077 |
| A_21_P0000281  | NR_002737       | SNORD59A       | small nucleolar RNA, C/D box 59A                              |                 | 0,56934373  |
| A_33_P3260146  | NM_001193329    | C9orf3         | chromosome 9 open reading frame 3                             | ENST00000277198 | 0,56816644  |
| A_21_P0000372  | NR_003042       | SNORD45C       | small nucleolar RNA, C/D box 45C                              | ENST00000471759 | 0,568069756 |
| A_19_P00320242 | ENST00000551938 | LOC100506948   |                                                               | ENST00000551938 | 0,56804666  |
| A_32_P7823     | NM_144578       | MAPK1IP1L      | mitogen-activated protein kinase 1 interacting protein 1-like | ENST00000395468 | 0,567506394 |
| A_32_P24376    | NM_001165252    | LOC730755      | keratin associated protein 2-4-like                           | ENST00000391418 | 0,567406177 |
| A_21_P0005349  | ENST00000421380 | XLOC_005965    |                                                               | ENST00000421380 | 0,567364613 |
| A_23_P105118   | NM_001005237    | OR51G1         | olfactory receptor, family 51, subfamily G, member 1          | ENST00000321961 | 0,567113983 |
| A_33_P3261173  | NM_005479       | FRAT1          | frequently rearranged in advanced T-cell lymphomas            | ENST00000490980 | 0,566841325 |
| A_23_P91850    | NM_144717       | IL20RB         | interleukin 20 receptor beta                                  | ENST00000475972 | 0,566452484 |
| A_21_P0014779  | ENST00000494753 | PLIN2          | perilipin 2                                                   | ENST00000494753 | 0,566111439 |
| A_21_P0004133  | ENST00000510261 | XLOC_004847    |                                                               | ENST00000510261 | 0,566005765 |
| A_33_P3423874  | NM_001018100    | MYZAP          | myocardial zonula adherens protein                            | ENST00000380565 | 0,565585064 |
| A_21_P0001652  | TCONS_00001898  | XLOC_001286    |                                                               |                 | 0,565230494 |
| A_33_P3223062  | XR_110934       | LOC100507199   | uncharacterized LOC100507199                                  | ENST00000445330 | 0,56479765  |
| A_33_P3278774  | ENST00000483826 | ZNF44          | zinc finger protein 44                                        | ENST00000483826 | 0,564086554 |
| A_24_P129632   | NM_004747       | DLG5           | discs, large homolog 5 (Drosophila)                           | ENST00000372388 | 0,563697645 |
| A_33_P3329793  | NR_003228       | AFG3L1P        | AFG3 ATPase family gene 3-like 1 (S. cerevisiae), pseudogene  | ENST00000355531 | 0,563375889 |
| A_23_P90079    | NM_001080821    | ZNF799         | zinc finger protein 799                                       | ENST00000430385 | 0,562966689 |
| A_21_P0000382  | NR_003059       | SNORD71        | small nucleolar RNA, C/D box 71                               |                 | 0,562878202 |
| A_33_P3254306  | ENST00000389168 | FLCN           | folliculin                                                    | ENST00000389168 | 0,562785741 |
| A_21_P0000497  | NR_004396       | SNORD1B        | small nucleolar RNA, C/D box 1B                               |                 | 0,562325091 |
| A_33_P3420266  | NM_001012421    | ANKRD20A2      | ankyrin repeat domain 20 family, member A2                    | ENST00000427650 | 0,562249831 |
| A_21_P0003290  | TCONS_00007198  | XLOC_003181    |                                                               |                 | 0,561988856 |
| A_21_P0011299  | THC2554687      | XLOC_I2_004595 |                                                               |                 | 0,561729769 |
| A_21_P0003137  | NM_001190470    | MTRNR2L2       | MT-RNR2-like 2                                                | ENST00000536684 | 0,56123225  |

|               |                  |                |                                                                 |                 |             |
|---------------|------------------|----------------|-----------------------------------------------------------------|-----------------|-------------|
| A_23_P335039  | NM_133474        | ZNF721         | zinc finger protein 721                                         | ENST00000338977 | 0,560749662 |
| A_33_P3301752 | XR_108277        | FLJ21369       | uncharacterized protein FLJ21369                                |                 | 0,559725657 |
| A_33_P3220090 | NM_001076781     | ZNF391         | zinc finger protein 391                                         | ENST00000244576 | 0,559660063 |
| A_33_P3266923 | NM_014916        | LMTK2          | lemur tyrosine kinase 2                                         | ENST00000297293 | 0,559388119 |
| A_21_P0010959 | TCONS_I2_0000433 | XLOC_I2_002194 |                                                                 |                 | 0,558825348 |
| A_21_P0008781 | ENST00000554440  | XLOC_011583    |                                                                 | ENST00000554440 | 0,558783736 |
| A_32_P37592   | NR_003003        | SCARNA17       | small Cajal body-specific RNA 17                                |                 | 0,558702609 |
| A_23_P60727   | NM_002247        | KCNMA1         | potassium large conductance calcium-activated channel, su       | ENST00000412708 | 0,558408125 |
| A_21_P0004986 | TCONS_00012039   | XLOC_005574    |                                                                 |                 | 0,558371468 |
| A_21_P0009786 | BC034565         | XLOC_013043    |                                                                 |                 | 0,558306549 |
| A_33_P3394065 | ENST00000376565  | PIP4K2A        | phosphatidylinositol-5-phosphate 4-kinase, type II, alpha       | ENST00000376565 | 0,557589532 |
| A_23_P102000  | NM_001008540     | CXCR4          | chemokine (C-X-C motif) receptor 4                              | ENST00000241393 | 0,55752593  |
| A_23_P107963  | NM_000148        | FUT1           | fucosyltransferase 1 (galactoside 2-alpha-L-fucosyltransferase) | ENST00000310160 | 0,557411236 |
| A_21_P0001875 | ENST00000433065  | XLOC_001515    |                                                                 | ENST00000433065 | 0,557325396 |
| A_21_P0005632 | AK130001         | XLOC_006857    |                                                                 |                 | 0,557259482 |
| A_33_P3379017 | NM_015094        | HIC2           | hypermethylated in cancer 2                                     | ENST00000407598 | 0,556612434 |
| A_23_P75063   | NM_032372        | DYDC2          | DPY30 domain containing 2                                       | ENST00000444807 | 0,556577702 |
| A_23_P66967   | NM_004066        | CETN1          | centrin, EF-hand protein, 1                                     | ENST00000327228 | 0,556518292 |
| A_23_P59069   | NM_003527        | HIST1H2BO      | histone cluster 1, H2bo                                         | ENST00000303806 | 0,556287761 |
| A_23_P168556  | NM_004603        | STX1A          | syntaxin 1A (brain)                                             | ENST00000222812 | 0,556068093 |
| A_21_P0013397 | ENST00000425880  | XLOC_I2_013529 |                                                                 | ENST00000425880 | 0,556026102 |
| A_33_P3812815 | NM_000296        | PKD1           | polycystic kidney disease 1 (autosomal dominant)                | ENST00000537889 | 0,555593388 |
| A_23_P167401  | NM_018931        | PCDHB11        | protocadherin beta 11                                           | ENST00000536699 | 0,555365984 |
| A_33_P3375451 | NM_025081        | NYNRIN         | NYN domain and retroviral integrase containing                  | ENST00000206466 | 0,555320719 |
| A_23_P213166  | NM_018392        | C4orf21        | chromosome 4 open reading frame 21                              | ENST00000506675 | 0,555276685 |
| A_23_P164737  | NM_004831        | MED26          | mediator complex subunit 26                                     | ENST00000263390 | 0,554970209 |
| A_23_P405110  | NM_033313        | CDC14A         | CDC14 cell division cycle 14 homolog A (S. cerevisiae)          | ENST00000370124 | 0,554557114 |
| A_21_P0003151 | TCONS_00006586   | XLOC_003203    |                                                                 |                 | 0,554418736 |
| A_33_P3806704 | AF130117         | LOC100129198   | PRO2866                                                         |                 | 0,55418969  |

|                |                 |                |                                             |                 |             |
|----------------|-----------------|----------------|---------------------------------------------|-----------------|-------------|
| A_33_P3405888  | AF130105        | LOC100133130   | PRO1102                                     |                 | 0,553708647 |
| A_23_P79145    | NM_144694       | ZNF570         | zinc finger protein 570                     | ENST00000330173 | 0,553456554 |
| A_19_P00316719 | ENST00000451392 | XLOC_I2_008434 |                                             | ENST00000451392 | 0,553373616 |
| A_33_P3421748  | ENST00000381679 | SON            | SON DNA binding protein                     | ENST00000381679 | 0,553099312 |
| A_21_P0010592  | NR_033908       | LOC100288069   | general transcription factor Ili pseudogene | ENST00000447412 | 0,552375667 |
| A_23_P74042    | NM_012302       | LPHN2          | latrophilin 2                               | ENST00000370725 | 0,552198935 |
| A_33_P3272429  | ENST00000472407 | CCDC126        | coiled-coil domain containing 126           | ENST00000472407 | 0,552132318 |
| A_21_P0001771  | AK022396        | FLJ12334       | uncharacterized LOC400946                   |                 | 0,552096633 |
| A_21_P0001842  | NR_033875       | FLJ12334       | uncharacterized LOC400946                   |                 | 0,551635696 |
| A_21_P0000254  | NR_002560       | SNORD31        | small nucleolar RNA, C/D box 31             |                 | 0,550522608 |
| A_23_P304016   | BC006438        | LOC100132167   | uncharacterized LOC100132167                |                 | 0,550085711 |
| A_23_P256244   | ENST00000497705 | OXR1           | oxidation resistance 1                      | ENST00000497705 | 0,54920284  |
| A_23_P108342   | NM_016536       | ZNF571         | zinc finger protein 571                     | ENST00000358744 | 0,549185511 |
| A_21_P0003480  | ENST00000510744 | XLOC_003988    |                                             | ENST00000510744 | 0,549085314 |
| A_33_P3252333  | NR_003271       | SNORD3B-1      | small nucleolar RNA, C/D box 3B-1           |                 | 0,548954989 |
| A_21_P0007844  | XR_110328       | LOC100507616   | uncharacterized LOC100507616                |                 | 0,548851331 |
| A_23_P428999   | NM_006540       | NCOA2          | nuclear receptor coactivator 2              | ENST00000518287 | 0,548750208 |
| A_23_P108932   | NR_002229       | RPL23AP32      | ribosomal protein L23a pseudogene 32        |                 | 0,548665227 |
| A_24_P226332   | NM_004440       | EPHA7          | EPH receptor A7                             | ENST00000369303 | 0,548544041 |
| A_21_P0012396  | NR_027898       | COL6A4P2       | collagen, type VI, alpha 4 pseudogene 2     |                 | 0,548394009 |
| A_23_P218827   | NM_199420       | POLQ           | polymerase (DNA directed), theta            | ENST00000393672 | 0,548329133 |
| A_21_P0000268  | NR_002584       | SNORA69        | small nucleolar RNA, H/ACA box 69           | ENST00000477403 | 0,54807721  |
| A_21_P0006142  | TCONS_00015970  | XLOC_007342    |                                             |                 | 0,547833639 |
| A_24_P378402   | NM_152457       | ZNF597         | zinc finger protein 597                     | ENST00000301744 | 0,547517074 |
| A_21_P0000209  | NR_000009       | SNORD4B        | small nucleolar RNA, C/D box 4B             |                 | 0,547270031 |
| A_33_P3640690  | NM_001128128    | ZEB1           | zinc finger E-box binding homeobox 1        | ENST00000541037 | 0,547260141 |
| A_33_P3388771  | XR_133170       | LOC100509175   | zinc finger protein 726-like                |                 | 0,546814836 |
| A_33_P3399864  | NM_175872       | ZNF792         | zinc finger protein 792                     | ENST00000379189 | 0,54624119  |
| A_21_P0000224  | NR_000027       | SNORD83A       | small nucleolar RNA, C/D box 83A            |                 | 0,546154172 |

|               |                  |                |                                                                     |                 |             |
|---------------|------------------|----------------|---------------------------------------------------------------------|-----------------|-------------|
| A_33_P3323347 | NM_152475        | ZNF417         | zinc finger protein 417                                             | ENST00000312026 | 0,546057466 |
| A_21_P0006339 | TCONS_00016530   | XLOC_007264    |                                                                     |                 | 0,54544999  |
| A_33_P3366048 | NM_080616        | C20orf112      | chromosome 20 open reading frame 112                                | ENST00000359676 | 0,545007569 |
| A_32_P2392    | NM_181077        | GOLGA8A        | golgin A8 family, member A                                          | ENST00000509311 | 0,544890464 |
| A_33_P3709317 | NR_002964        | SNORA28        | small nucleolar RNA, H/ACA box 28                                   |                 | 0,544656818 |
| A_23_P165676  | ENST00000491265  | MZT2A          | mitotic spindle organizing protein 2A                               | ENST00000491265 | 0,543964877 |
| A_23_P205177  | NM_000504        | F10            | coagulation factor X                                                | ENST00000375559 | 0,543580083 |
| A_23_P8013    | NM_003519        | HIST1H2BL      | histone cluster 1, H2bl                                             | ENST00000377401 | 0,542878634 |
| A_23_P115861  | NM_145312        | ZNF485         | zinc finger protein 485                                             | ENST00000374437 | 0,542812427 |
| A_21_P0011003 | TCONS_I2_0000486 | XLOC_I2_002537 |                                                                     |                 | 0,542749922 |
| A_33_P3314550 | NM_002866        | RAB3A          | RAB3A, member RAS oncogene family                                   | ENST00000222256 | 0,542737816 |
| A_33_P3365710 | AK125522         | ATP6V0D1       | ATPase, H <sup>+</sup> transporting, lysosomal 38kDa, V0 subunit d1 |                 | 0,542602586 |
| A_23_P346421  | NM_018181        | ZNF532         | zinc finger protein 532                                             | ENST00000336078 | 0,542519517 |
| A_33_P3381483 | NM_018555        | ZNF331         | zinc finger protein 331                                             | ENST00000253144 | 0,542393187 |
| A_32_P140706  | NM_000535        | PMS2           | PMS2 postmeiotic segregation increased 2 ( <i>S. cerevisiae</i> )   | ENST00000338780 | 0,542054985 |
| A_32_P169179  | NR_002307        | MSX2P1         | msh homeobox 2 pseudogene 1                                         |                 | 0,542043001 |
| A_21_P0000563 | NR_028374        | SNORA80B       | small nucleolar RNA, H/ACA box 80B                                  |                 | 0,541623151 |
| A_24_P22981   | NM_021047        | ZNF253         | zinc finger protein 253                                             | ENST00000355650 | 0,540992534 |
| A_21_P0004664 | ENST00000443221  | XLOC_005365    |                                                                     | ENST00000443221 | 0,540952377 |
| A_33_P3374035 | AK094630         | PDXK           | pyridoxal (pyridoxine, vitamin B6) kinase                           |                 | 0,540724673 |
| A_33_P3388283 | ENST00000496907  | HMGCL          | 3-hydroxymethyl-3-methylglutaryl-CoA lyase                          | ENST00000496907 | 0,540213756 |
| A_23_P108342  | NM_016536        | ZNF571         | zinc finger protein 571                                             | ENST00000358744 | 0,539964919 |
| A_24_P860797  | NM_020459        | PAIP2B         | poly(A) binding protein interacting protein 2B                      | ENST00000244221 | 0,539763986 |
| A_23_P259555  | NM_030959        | OR12D3         | olfactory receptor, family 12, subfamily D, member 3                | ENST00000377143 | 0,539661448 |
| A_23_P111395  | NM_003058        | SLC22A2        | solute carrier family 22 (organic cation transporter), member 2     | ENST00000498556 | 0,539601323 |
| A_23_P122068  | NM_181435        | C1QTNF3        | C1q and tumor necrosis factor related protein 3                     | ENST00000513471 | 0,539375084 |
| A_33_P3318444 | NM_001146684     | RNF222         | ring finger protein 222                                             | ENST00000399398 | 0,539347298 |
| A_24_P121846  | NM_003433        | ZNF132         | zinc finger protein 132                                             | ENST00000391695 | 0,539227708 |
| A_21_P0013650 | TCONS_I2_0002934 | XLOC_I2_015212 |                                                                     |                 | 0,538614504 |

|               |                  |                |                                                       |                 |             |
|---------------|------------------|----------------|-------------------------------------------------------|-----------------|-------------|
| A_24_P292470  | NM_022803        | UCP3           | uncoupling protein 3 (mitochondrial, proton carrier)  | ENST00000426995 | 0,538312389 |
| A_24_P48248   | NM_024032        | C17orf53       | chromosome 17 open reading frame 53                   | ENST00000245382 | 0,538265436 |
| A_23_P309950  | ENST00000370271  | FAM178A        | family with sequence similarity 178, member A         | ENST00000370271 | 0,538179755 |
| A_23_P27636   | NM_144566        | ZNF700         | zinc finger protein 700                               | ENST00000254321 | 0,538160795 |
| A_33_P3313145 | NM_002217        | ITIH3          | inter-alpha-trypsin inhibitor heavy chain 3           | ENST00000493136 | 0,537881825 |
| A_21_P0013856 | THC2516011       | XLOC_I2_015641 |                                                       |                 | 0,537870491 |
| A_21_P0004225 | TCONS_00009868   | XLOC_004285    |                                                       |                 | 0,53760374  |
| A_23_P115861  | NM_145312        | ZNF485         | zinc finger protein 485                               | ENST00000374437 | 0,537013695 |
| A_21_P0013267 | NR_026999        | LINC00265      | long intergenic non-protein coding RNA 265            | ENST00000427210 | 0,536994967 |
| A_33_P3346552 | NR_003287        | RN28S1         | RNA, 28S ribosomal 1                                  |                 | 0,536559931 |
| A_33_P3229452 | AK126441         | FLJ44477       | FLJ44477 protein                                      |                 | 0,536471651 |
| A_33_P3327076 | NM_001001824     | OR2T27         | olfactory receptor, family 2, subfamily T, member 27  | ENST00000344889 | 0,536467948 |
| A_23_P58729   | NM_003052        | SLC34A1        | solute carrier family 34 (sodium phosphate), member 1 | ENST00000513614 | 0,536466326 |
| A_33_P3252630 | NM_203282        | ZNF254         | zinc finger protein 254                               | ENST00000392281 | 0,536204614 |
| A_33_P3300800 | NR_024042        | GUCY2E         | guanylate cyclase 2E                                  | ENST00000526984 | 0,535641938 |
| A_23_P67424   | NM_153257        | ZNF461         | zinc finger protein 461                               | ENST00000396892 | 0,535305616 |
| A_23_P50217   | NM_024833        | ZNF671         | zinc finger protein 671                               | ENST00000317398 | 0,535237976 |
| A_21_P0000161 | NM_001204911     | C16orf57       | chromosome 16 open reading frame 57                   |                 | 0,535135152 |
| A_21_P0014934 | NR_045375        | LOC100506124   | uncharacterized LOC100506124                          | ENST00000536175 | 0,535027117 |
| A_21_P0011737 | TCONS_I2_0001300 | XLOC_I2_006996 |                                                       |                 | 0,53489794  |
| A_33_P3373437 | XR_108760        | LOC100129463   | uncharacterized LOC100129463                          | ENST00000523608 | 0,53431684  |
| A_21_P0008920 | TCONS_00024362   | XLOC_011686    |                                                       |                 | 0,534259698 |
| A_21_P0014036 | ENST00000547771  | C12orf28       | chromosome 12 open reading frame 28                   | ENST00000547771 | 0,53409093  |
| A_21_P0006023 | ENST00000422010  | XLOC_007422    |                                                       | ENST00000422010 | 0,533444739 |
| A_24_P93754   | NM_001146694     | KDM4C          | lysine (K)-specific demethylase 4C                    | ENST00000381306 | 0,532681633 |
| A_23_P502464  | NM_000625        | NOS2           | nitric oxide synthase 2, inducible                    | ENST00000313735 | 0,532580255 |
| A_33_P3255741 | NM_007137        | ZNF81          | zinc finger protein 81                                | ENST00000376954 | 0,531791938 |
| A_23_P130482  | NM_198855        | ZNF211         | zinc finger protein 211                               | ENST00000254182 | 0,531758618 |
| A_23_P94141   | NM_001205262     | RAD54B         | RAD54 homolog B (S. cerevisiae)                       | ENST00000543299 | 0,531304067 |



|                |                  |                |                                                              |                 |             |
|----------------|------------------|----------------|--------------------------------------------------------------|-----------------|-------------|
| A_21_P0003553  | ENST00000508799  | XLOC_004228    |                                                              | ENST00000508799 | 0,530968362 |
| A_33_P3224795  | NM_022466        | IKZF5          | IKAROS family zinc finger 5 (Pegasus)                        | ENST00000368886 | 0,530942235 |
| A_33_P3438072  | NR_040039        | LOC157273      | uncharacterized LOC157273                                    | ENST00000520390 | 0,530873589 |
| A_33_P3274618  | NR_029401        | LOC731275      | uncharacterized LOC731275                                    | ENST00000427210 | 0,530526727 |
| A_21_P0011133  | NM_199254        | TPTE2          | transmembrane phosphoinositide 3-phosphatase and tensin      | ENST00000440905 | 0,530415392 |
| A_33_P3389852  | NM_017679        | BCAS3          | breast carcinoma amplified sequence 3                        | ENST00000405217 | 0,53026232  |
| A_33_P3313825  | ENST00000383765  | TGFBR2         | transforming growth factor, beta receptor II (70/80kDa)      | ENST00000383765 | 0,530256414 |
| A_21_P0014018  | XM_003403487     | LOC100652736   | uncharacterized protein LOC100652736                         |                 | 0,530254705 |
| A_21_P0012371  | CR624823         | LOC645206      | uncharacterized LOC645206                                    |                 | 0,529381666 |
| A_33_P3338152  | ENST00000457865  | HIF3A          | hypoxia inducible factor 3, alpha subunit                    | ENST00000457865 | 0,52925745  |
| A_33_P3242632  | NR_033930        | LOC646743      | uncharacterized LOC646743                                    | ENST00000419965 | 0,528964261 |
| A_21_P0009368  | XR_109440        | LOC100507520   | uncharacterized LOC100507520                                 |                 | 0,528849753 |
| A_33_P3325643  | NR_038369        | LINC00487      | long intergenic non-protein coding RNA 487                   | ENST00000382045 | 0,528842596 |
| A_32_P182394   | NM_021217        | ZNF77          | zinc finger protein 77                                       | ENST00000314531 | 0,528324215 |
| A_33_P3485760  | ENST00000462527  | EIF3A          | eukaryotic translation initiation factor 3, subunit A        | ENST00000462527 | 0,52810864  |
| A_19_P00318916 | NR_038988        | LOC100287765   |                                                              |                 | 0,528039398 |
| A_33_P3651282  | ENST00000546204  | TCP1           | t-complex 1                                                  | ENST00000546204 | 0,527834438 |
| A_23_P355439   | NM_170745        | HIST1H2AA      | histone cluster 1, H2aa                                      | ENST00000297012 | 0,527003352 |
| A_21_P0013894  | TCONS_I2_0003092 | XLOC_I2_015938 |                                                              |                 | 0,526827727 |
| A_33_P3278298  | AK131362         | NOM1           | nucleolar protein with MIF4G domain 1                        |                 | 0,526755967 |
| A_21_P0004760  | THC2677844       | XLOC_005764    |                                                              |                 | 0,526719693 |
| A_23_P120125   | NM_199235        | COLEC11        | collectin sub-family member 11                               | ENST00000382062 | 0,52657918  |
| A_24_P321634   | NM_001039650     | ZMYM5          | zinc finger, MYM-type 5                                      | ENST00000467542 | 0,526515191 |
| A_24_P350589   | NM_020724        | RNF150         | ring finger protein 150                                      | ENST00000306799 | 0,526497155 |
| A_21_P0007077  | TCONS_00018816   | XLOC_008613    |                                                              |                 | 0,52617504  |
| A_33_P3253628  | ENST00000476487  | AGXT2L2        | alanine-glyoxylate aminotransferase 2-like 2                 | ENST00000476487 | 0,526129912 |
| A_21_P0000847  | NR_038942        | LOC100630918   | uncharacterized LOC100630918                                 |                 | 0,525983686 |
| A_24_P409519   | NM_006906        | PTPN5          | protein tyrosine phosphatase, non-receptor type 5 (striatum) | ENST00000396171 | 0,525958964 |
| A_23_P359636   | NM_144695        | BROX           | BRO1 domain and CAAX motif containing                        | ENST00000539697 | 0,52595465  |

|                |                 |              |                                                             |                 |             |
|----------------|-----------------|--------------|-------------------------------------------------------------|-----------------|-------------|
| A_21_P0000244  | NR_002440       | SNORD16      | small nucleolar RNA, C/D box 16                             |                 | 0,525710948 |
| A_33_P3380625  | NM_005529       | HSPG2        | heparan sulfate proteoglycan 2                              | ENST00000374676 | 0,525557499 |
| A_33_P3303748  | NM_017990       | PDPR         | pyruvate dehydrogenase phosphatase regulatory subunit       | ENST00000429810 | 0,524461765 |
| A_21_P0012222  | BC036580        | C21orf81     | ankyrin repeat domain 20 family, member A3 pseudogene       |                 | 0,524145194 |
| A_23_P127394   | NM_021117       | CRY2         | cryptochrome 2 (photolyase-like)                            | ENST00000443527 | 0,524132272 |
| A_21_P0011390  | Y10483          | PRKXP1       | protein kinase, X-linked, pseudogene 1                      |                 | 0,524132188 |
| A_24_P168574   | ENST00000481768 | GNAS         | GNAS complex locus                                          | ENST00000481768 | 0,524029368 |
| A_33_P3291524  | NM_001143939    | ZNF534       | zinc finger protein 534                                     | ENST00000332323 | 0,523991466 |
| A_33_P3271930  | NM_153824       | PYCR1        | pyrroline-5-carboxylate reductase 1                         | ENST00000402252 | 0,523614116 |
| A_21_P0004121  | ENST00000511579 | XLOC_004774  |                                                             | ENST00000511579 | 0,523589263 |
| A_33_P3390955  | NR_004422       | HPVC1        | human papillomavirus (type 18) E5 central sequence-like 1   |                 | 0,52314109  |
| A_21_P0000560  | NR_028358       | TMEM30C      | transmembrane protein 30C                                   | ENST00000476804 | 0,523038201 |
| A_21_P0007078  | TCONS_00018817  | XLOC_008614  |                                                             |                 | 0,522822324 |
| A_21_P0004549  | TCONS_00010875  | XLOC_004700  |                                                             |                 | 0,521767728 |
| A_19_P00321765 | NR_038988       | LOC100287765 |                                                             |                 | 0,521585578 |
| A_33_P3265956  | ENST00000397798 | CBFA2T2      | core-binding factor, runt domain, alpha subunit 2; transloc | ENST00000397798 | 0,521566494 |
| A_23_P125686   | NR_002226       | INGX         | inhibitor of growth family, X-linked, pseudogene            | ENST00000489074 | 0,521510993 |
| A_33_P3299165  | NR_033889       | LOC440131    | uncharacterized LOC440131                                   | ENST00000380640 | 0,52106666  |
| A_33_P3365134  | NM_015316       | PPP1R13B     | protein phosphatase 1, regulatory subunit 13B               | ENST00000423488 | 0,52102451  |
| A_21_P0005809  | BC043205        | C8orf50      | chromosome 8 open reading frame 50                          |                 | 0,520880831 |
| A_23_P501080   | NM_007139       | ZNF92        | zinc finger protein 92                                      | ENST00000450302 | 0,520442375 |
| A_33_P3324181  | AK096599        | LOC283112    | uncharacterized LOC283112                                   |                 | 0,519677901 |
| A_33_P3671729  | AK126671        | FLJ44715     | FLJ44715 gene product                                       |                 | 0,519348011 |
| A_23_P108673   | NM_032181       | FAM176A      | family with sequence similarity 176, member A               | ENST00000410113 | 0,519202843 |
| A_21_P0000486  | NR_004054       | SNORD103A    | small nucleolar RNA, C/D box 103A                           |                 | 0,519106837 |
| A_23_P364107   | NM_018353       | MIS18BP1     | MIS18 binding protein 1                                     | ENST00000470424 | 0,519054002 |
| A_23_P308954   | NM_030639       | BHLHB9       | basic helix-loop-helix domain containing, class B, 9        | ENST00000457056 | 0,518516153 |
| A_23_P99405    | NM_003453       | ZMYM2        | zinc finger, MYM-type 2                                     | ENST00000382871 | 0,518245116 |
| A_33_P3257042  | NM_001193552    | ZNF850       | zinc finger protein 850                                     |                 | 0,51823021  |

|               |                 |                |                                                  |                 |             |
|---------------|-----------------|----------------|--------------------------------------------------|-----------------|-------------|
| A_32_P151875  | NM_020781       | ZNF398         | zinc finger protein 398                          | ENST00000426851 | 0,518216284 |
| A_33_P3321369 | XR_109231       | LOC145757      | uncharacterized LOC145757                        |                 | 0,517641466 |
| A_33_P3333587 | NM_032875       | FBXL20         | F-box and leucine-rich repeat protein 20         | ENST00000264658 | 0,517515281 |
| A_23_P120170  | NM_145702       | TIGD1          | tigger transposable element derived 1            | ENST00000408957 | 0,517159107 |
| A_33_P3209005 | AK097159        | ZNF673         | zinc finger family member 673                    |                 | 0,517096485 |
| A_33_P3422301 | NM_032406       | PCDHGC4        | protocadherin gamma subfamily C, 4               | ENST00000306593 | 0,517021057 |
| A_33_P3287113 | ENST00000296312 | KIAA1530       | KIAA1530                                         | ENST00000296312 | 0,516918905 |
| A_21_P0011935 | ENST00000431244 | XLOC_I2_008140 |                                                  | ENST00000431244 | 0,516752664 |
| A_23_P131348  | NM_025264       | THUMPD2        | THUMP domain containing 2                        | ENST00000530095 | 0,516581976 |
| A_33_P3229067 | NM_003520       | HIST1H2BN      | histone cluster 1, H2bn                          | ENST00000396980 | 0,516574402 |
| A_24_P85243   | ENST00000360669 | FAM153A        | family with sequence similarity 153, member A    | ENST00000360669 | 0,516472027 |
| A_33_P3321801 | NR_027439       | LOC100272216   | uncharacterized LOC100272216                     |                 | 0,516320654 |
| A_23_P147439  | NM_148416       | ATXN2L         | ataxin 2-like                                    | ENST00000359153 | 0,51614652  |
| A_33_P3317387 | BC033823        | DNAJC3         | DnaJ (Hsp40) homolog, subfamily C, member 3      |                 | 0,515893455 |
| A_23_P383132  | NM_015094       | HIC2           | hypermethylated in cancer 2                      | ENST00000443632 | 0,515738602 |
| A_23_P129005  | NM_025081       | NYNRIN         | NYN domain and retroviral integrase containing   | ENST00000382554 | 0,515635136 |
| A_33_P3363082 | NR_003008       | SCARNA5        | small Cajal body-specific RNA 5                  |                 | 0,515500055 |
| A_23_P217899  | NM_030937       | CCNL2          | cyclin L2                                        | ENST00000480479 | 0,515420304 |
| A_33_P3520835 | AK123449        | FLJ41455       | uncharacterized LOC441441                        |                 | 0,515141207 |
| A_33_P3355266 | NM_022164       | TINAGL1        | tubulointerstitial nephritis antigen-like 1      | ENST00000481165 | 0,514978601 |
| A_33_P3288569 | NM_001144891    | MBIP           | MAP3K12 binding inhibitory protein 1             | ENST00000554855 | 0,514674479 |
| A_21_P0005089 | TCONS_00012365  | XLOC_005930    |                                                  |                 | 0,514671834 |
| A_33_P3361412 | NM_018420       | SLC22A15       | solute carrier family 22, member 15              | ENST00000369502 | 0,514406754 |
| A_21_P0000291 | NR_002751       | SNORD41        | small nucleolar RNA, C/D box 41                  |                 | 0,514389787 |
| A_32_P226009  | NM_023073       | C5orf42        | chromosome 5 open reading frame 42               | ENST00000505431 | 0,514333382 |
| A_23_P59855   | NM_006524       | ZNF138         | zinc finger protein 138                          | ENST00000359735 | 0,514260639 |
| A_21_P0011288 | NM_012102       | RERE           | arginine-glutamic acid dipeptide (RE) repeats    | ENST00000480342 | 0,514247117 |
| A_33_P3232945 | NM_005242       | F2RL1          | coagulation factor II (thrombin) receptor-like 1 | ENST00000296677 | 0,514105265 |
| A_23_P108342  | NM_016536       | ZNF571         | zinc finger protein 571                          | ENST00000358744 | 0,513984834 |

|               |                 |              |                                                        |                 |             |
|---------------|-----------------|--------------|--------------------------------------------------------|-----------------|-------------|
| A_23_P39050   | NM_001080493    | ZNF823       | zinc finger protein 823                                | ENST00000341191 | 0,51394954  |
| A_24_P102053  | NM_002538       | OCN          | occludin                                               | ENST00000396442 | 0,513648549 |
| A_23_P303101  | NM_032406       | PCDHGC4      | protocadherin gamma subfamily C, 4                     |                 | 0,513384989 |
| A_24_P367242  | NM_181607       | KRTAP19-1    | keratin associated protein 19-1                        | ENST00000433652 | 0,513345481 |
| A_33_P3418511 | NR_027756       | HTA          | uncharacterized LOC283902                              |                 | 0,513227174 |
| A_21_P0013977 | ENST00000493650 | PCID2        | PCI domain containing 2                                | ENST00000493650 | 0,513137958 |
| A_23_P84910   | NM_003446       | ZNF157       | zinc finger protein 157                                | ENST00000377073 | 0,513048924 |
| A_33_P3331426 | XR_108343       | FLJ37786     | uncharacterized LOC642691                              |                 | 0,513038087 |
| A_21_P0000222 | NR_000024       | SNORD46      | small nucleolar RNA, C/D box 46                        |                 | 0,512641105 |
| A_23_P366216  | NM_003524       | HIST1H2BH    | histone cluster 1, H2bh                                | ENST00000356350 | 0,512549916 |
| A_33_P3409245 | XR_110199       | LOC401286    | uncharacterized LOC401286                              |                 | 0,512365387 |
| A_23_P101811  | NM_021030       | ZNF14        | zinc finger protein 14                                 | ENST00000344099 | 0,512013719 |
| A_33_P3318861 | NM_001093730    | DYTN         | dystrotelin                                            | ENST00000452335 | 0,511815793 |
| A_33_P3274034 | ENST00000316024 | WRAP53       | WD repeat containing, antisense to TP53                | ENST00000316024 | 0,511775534 |
| A_32_P170547  | NM_001007551    | CT45A5       | cancer/testis antigen family 45, member A5             | ENST00000491480 | 0,511729189 |
| A_33_P3404435 | NM_001160224    | RNF170       | ring finger protein 170                                | ENST00000319104 | 0,51164476  |
| A_33_P3213419 | AK054946        | LOC100129447 | uncharacterized LOC100129447                           |                 | 0,511441811 |
| A_33_P3352632 | AK096262        | LOC728147    | uncharacterized LOC728147                              |                 | 0,51136976  |
| A_24_P50248   | NM_001077710    | FAM110C      | family with sequence similarity 110, member C          | ENST00000327669 | 0,511334403 |
| A_23_P41541   | NM_138364       | PRMT10       | protein arginine methyltransferase 10 (putative)       | ENST00000511687 | 0,511271986 |
| A_23_P108342  | NM_016536       | ZNF571       | zinc finger protein 571                                | ENST00000358744 | 0,510982319 |
| A_23_P107693  | NM_017652       | ZNF586       | zinc finger protein 586                                | ENST00000449441 | 0,51097015  |
| A_23_P160869  | NM_014813       | LRIG2        | leucine-rich repeats and immunoglobulin-like domains 2 | ENST00000466161 | 0,510880988 |
| A_33_P3359791 | ENST00000484389 | TDRD3        | tudor domain containing 3                              | ENST00000484389 | 0,510858863 |
| A_33_P3366754 | AK126945        | LOC100128670 | uncharacterized LOC100128670                           |                 | 0,510641706 |
| A_23_P40078   | NM_003400       | XPO1         | exportin 1 (CRM1 homolog, yeast)                       | ENST00000406957 | 0,510636991 |
| A_33_P3256272 | NM_198694       | KRTAP10-5    | keratin associated protein 10-5                        | ENST00000400372 | 0,510570942 |
| A_23_P110462  | NM_013340       | PCDHB1       | protocadherin beta 1                                   | ENST00000306549 | 0,5105272   |
| A_21_P0000980 | ENST00000450811 | XLOC_000229  |                                                        | ENST00000450811 | 0,510374068 |

|                |                   |                |                                                              |                 |  |              |
|----------------|-------------------|----------------|--------------------------------------------------------------|-----------------|--|--------------|
| A_21_P0009251  | TCONS_00025417    | XLOC_012226    |                                                              |                 |  | 0,510319701  |
| A_21_P0010681  | TCONS_I2_00001916 | XLOC_I2_001414 |                                                              |                 |  | 0,510292209  |
| A_23_P108342   | NM_016536         | ZNF571         | zinc finger protein 571                                      | ENST00000358744 |  | 0,510070859  |
| A_33_P3387155  | NR_002814         | LOC374443      | CLR pseudogene                                               |                 |  | -0,500052592 |
| A_23_P12082    | NM_001025199      | CHI3L2         | chitinase 3-like 2                                           | ENST00000369748 |  | -0,500126425 |
| A_23_P163639   | NM_013275         | ANKRD11        | ankyrin repeat domain 11                                     | ENST00000378330 |  | -0,500258228 |
| A_23_P101246   | NM_001163922      | VSIG10L        | V-set and immunoglobulin domain containing 10 like           | ENST00000335624 |  | -0,500282771 |
| A_21_P0001444  | TCONS_00001347    | XLOC_000638    |                                                              |                 |  | -0,500297171 |
| A_23_P23279    | NM_052862         | RCSD1          | RCSD domain containing 1                                     | ENST00000367854 |  | -0,500324732 |
| A_24_P296698   | NM_145109         | MAP2K3         | mitogen-activated protein kinase kinase 3                    | ENST00000316920 |  | -0,500650283 |
| A_24_P226008   | NM_007283         | MGLL           | monoglyceride lipase                                         | ENST00000536024 |  | -0,500717483 |
| A_23_P114983   | NM_032588         | TRIM63         | tripartite motif containing 63                               | ENST00000374272 |  | -0,500778374 |
| A_23_P3956     | NM_198594         | C1QTNF1        | C1q and tumor necrosis factor related protein 1              | ENST00000339142 |  | -0,500822486 |
| A_24_P286465   | NM_033224         | PURB           | purine-rich element binding protein B                        | ENST00000395699 |  | -0,500843076 |
| A_33_P3385785  | NM_005621         | S100A12        | S100 calcium binding protein A12                             | ENST00000368736 |  | -0,500852935 |
| A_23_P101246   | NM_001163922      | VSIG10L        | V-set and immunoglobulin domain containing 10 like           | ENST00000335624 |  | -0,500957082 |
| A_33_P3223759  | NM_005121         | MED13          | mediator complex subunit 13                                  | ENST00000397786 |  | -0,501006818 |
| A_33_P3334908  | NM_145177         | DHRX           | dehydrogenase/reductase (SDR family) X-linked                | ENST00000334651 |  | -0,501008659 |
| A_23_P65068    | NM_001008394      | EID3           | EP300 interacting inhibitor of differentiation 3             | ENST00000527879 |  | -0,501427192 |
| A_33_P3260430  | NM_005988         | SPRR2A         | small proline-rich protein 2A                                | ENST00000392653 |  | -0,501496924 |
| A_33_P3291484  | NM_005668         | ST8SIA4        | ST8 alpha-N-acetyl-neuraminide alpha-2,8-sialyltransferase 4 |                 |  | -0,501502255 |
| A_24_P286569   | NM_018697         | LANCL2         | LanC lantibiotic synthetase component C-like 2 (bacterial)   | ENST00000254770 |  | -0,501793905 |
| A_23_P121480   | NM_001004196      | CD200          | CD200 molecule                                               | ENST00000478595 |  | -0,502342835 |
| A_33_P3241021  | ENST00000416624   | CD69           | CD69 molecule                                                | ENST00000416624 |  | -0,502471946 |
| A_21_P0011827  | TCONS_I2_00013845 | XLOC_I2_007449 |                                                              |                 |  | -0,502723801 |
| A_24_P253818   | NM_004475         | FLOT2          | flotillin 2                                                  | ENST00000465427 |  | -0,502746314 |
| A_32_P231568   | NM_152573         | RASEF          | RAS and EF-hand domain containing                            | ENST00000376447 |  | -0,502818032 |
| A_33_P3249072  | ENST00000370642   | HOGA1          | 4-hydroxy-2-oxoglutarate aldolase 1                          | ENST00000370642 |  | -0,50284062  |
| A_19_P00805812 | THC2535688        | Q5A5F0         |                                                              |                 |  | -0,502844838 |



|               |                   |                |                                                                      |                 |  |              |
|---------------|-------------------|----------------|----------------------------------------------------------------------|-----------------|--|--------------|
| A_21_P0005154 | TCONS_00012648    | XLOC_005589    |                                                                      |                 |  | -0,503089982 |
| A_24_P238040  | NM_004505         | USP6           | ubiquitin specific peptidase 6 (Tre-2 oncogene)                      | ENST00000332776 |  | -0,503188224 |
| A_23_P142849  | NM_005168         | RND3           | Rho family GTPase 3                                                  | ENST00000375734 |  | -0,503479442 |
| A_23_P67042   | NM_017947         | MOCOS          | molybdenum cofactor sulfurase                                        | ENST00000261326 |  | -0,503732355 |
| A_23_P12082   | NM_001025199      | CHI3L2         | chitinase 3-like 2                                                   | ENST00000369748 |  | -0,503921308 |
| A_33_P3630129 | AK128708          | FLJ46875       | uncharacterized LOC440918                                            |                 |  | -0,503933007 |
| A_32_P98072   | NM_007113         | TCHH           | trichohyalin                                                         | ENST00000368804 |  | -0,503991133 |
| A_21_P0011723 | TCONS_I2_00012888 | XLOC_I2_006937 |                                                                      |                 |  | -0,504373659 |
| A_33_P3738458 | NM_022648         | TNS1           | tensin 1                                                             | ENST00000171887 |  | -0,50438626  |
| A_23_P103765  | NM_002001         | FCER1A         | Fc fragment of IgE, high affinity I, receptor for; alpha polypeptide | ENST00000368115 |  | -0,504473893 |
| A_23_P101246  | NM_001163922      | VSIG10L        | V-set and immunoglobulin domain containing 10 like                   | ENST00000335624 |  | -0,504545879 |
| A_23_P57036   | NM_001250         | CD40           | CD40 molecule, TNF receptor superfamily member 5                     | ENST00000477696 |  | -0,504730559 |
| A_21_P0008500 | TCONS_00022897    | XLOC_011151    |                                                                      |                 |  | -0,504801178 |
| A_33_P3317580 | NM_001495         | GFRA2          | GDNF family receptor alpha 2                                         | ENST00000400782 |  | -0,504865748 |
| A_23_P253068  | NM_013366         | ANAPC2         | anaphase promoting complex subunit 2                                 | ENST00000483432 |  | -0,504873533 |
| A_23_P142849  | NM_005168         | RND3           | Rho family GTPase 3                                                  | ENST00000375734 |  | -0,50503936  |
| A_23_P99891   | NM_022566         | MESDC1         | mesoderm development candidate 1                                     | ENST00000267984 |  | -0,505179535 |
| A_21_P0002558 | TCONS_00004641    | XLOC_002554    |                                                                      |                 |  | -0,505273734 |
| A_23_P57036   | NM_001250         | CD40           | CD40 molecule, TNF receptor superfamily member 5                     | ENST00000477696 |  | -0,50527444  |
| A_23_P13907   | NM_000618         | IGF1           | insulin-like growth factor 1 (somatomedin C)                         | ENST00000481539 |  | -0,50536     |
| A_33_P3263867 | NM_002562         | P2RX7          | purinergic receptor P2X, ligand-gated ion channel, 7                 | ENST00000328963 |  | -0,505615288 |
| A_23_P3379    | NM_002891         | RASGRF1        | Ras protein-specific guanine nucleotide-releasing factor 1           | ENST00000394741 |  | -0,505678018 |
| A_32_P74955   | NM_152641         | ARID2          | AT rich interactive domain 2 (ARID, RFX-like)                        | ENST00000338636 |  | -0,505811558 |
| A_23_P154849  | NM_138983         | OLIG1          | oligodendrocyte transcription factor 1                               | ENST00000426947 |  | -0,506299068 |
| A_23_P147431  | NM_002350         | LYN            | v-yes-1 Yamaguchi sarcoma viral related oncogene homolog             | ENST00000519728 |  | -0,506335028 |
| A_23_P136936  | NM_003179         | SYP            | synaptophysin                                                        | ENST00000263233 |  | -0,506770701 |
| A_21_P0005841 | TCONS_00015020    | XLOC_007094    |                                                                      |                 |  | -0,506897235 |
| A_23_P23502   | NM_001005185      | OR6N1          | olfactory receptor, family 6, subfamily N, member 1                  | ENST00000335094 |  | -0,506928884 |
| A_24_P915196  | NM_153045         | C9orf91        | chromosome 9 open reading frame 91                                   | ENST00000374049 |  | -0,507149433 |

|               |                 |                |                                                                 |                 |              |
|---------------|-----------------|----------------|-----------------------------------------------------------------|-----------------|--------------|
| A_23_P120428  | NM_014477       | TP53TG5        | TP53 target 5                                                   | ENST00000494455 | -0,507595735 |
| A_24_P68908   | NR_033752       | LOC344887      | NmrA-like family domain containing 1 pseudogene                 | ENST00000423298 | -0,507874484 |
| A_23_P300033  | NM_006206       | PDGFRA         | platelet-derived growth factor receptor, alpha polypeptide      | ENST00000257290 | -0,507896325 |
| A_33_P3292402 | ENST00000468759 | LRRIQ3         | leucine-rich repeats and IQ motif containing 3                  | ENST00000468759 | -0,507964045 |
| A_23_P11984   | NM_201649       | SLC6A9         | solute carrier family 6 (neurotransmitter transporter, glycine) | ENST00000537678 | -0,508036773 |
| A_32_P208403  | NM_053064       | GNG2           | guanine nucleotide binding protein (G protein), gamma 2         | ENST00000335281 | -0,50805305  |
| A_21_P0008214 | THC2669116      | XLOC_010719    |                                                                 |                 | -0,508330464 |
| A_33_P3544856 | AK090616        | LOC100292680   | uncharacterized LOC100292680                                    |                 | -0,508464237 |
| A_24_P256692  | NM_198551       | MIA3           | melanoma inhibitory activity family, member 3                   | ENST00000344441 | -0,508570888 |
| A_21_P0013913 | XM_001713923    | LOC728802      | myomegalin-like                                                 |                 | -0,508611624 |
| A_23_P200999  | NM_174963       | ST3GAL3        | ST3 beta-galactoside alpha-2,3-sialyltransferase 3              | ENST00000262915 | -0,508734262 |
| A_21_P0012878 | NM_024786       | ZDHHC11        | zinc finger, DHHC-type containing 11                            | ENST00000507800 | -0,508830835 |
| A_21_P0001178 | AK124918        | XLOC_001023    |                                                                 |                 | -0,508835906 |
| A_24_P77082   | NM_003679       | KMO            | kynurenine 3-monooxygenase (kynurenine 3-hydroxylase)           | ENST00000366555 | -0,508892007 |
| A_23_P171095  | NM_001145073    | USP27X         | ubiquitin specific peptidase 27, X-linked                       |                 | -0,508920788 |
| A_21_P0006599 | TCONS_00017629  | XLOC_008277    |                                                                 |                 | -0,508968018 |
| A_21_P0009430 | AK094957        | FLJ37638       | uncharacterized LOC400660                                       |                 | -0,509331175 |
| A_33_P3237977 | NM_197958       | LARP6          | La ribonucleoprotein domain family, member 6                    | ENST00000344870 | -0,509452877 |
| A_21_P0000173 | NR_045116       | C5orf56        | chromosome 5 open reading frame 56                              | ENST00000464024 | -0,509654033 |
| A_24_P410797  | AK125979        | KALRN          | kalirin, RhoGEF kinase                                          | ENST00000393496 | -0,510053037 |
| A_21_P0010765 | ENST00000417385 | XLOC_l2_001037 |                                                                 | ENST00000417385 | -0,510053759 |
| A_21_P0011496 | NM_001025195    | CES1           | carboxylesterase 1                                              | ENST00000360526 | -0,510098342 |
| A_23_P319792  | NM_019001       | XRN1           | 5'-3' exoribonuclease 1                                         | ENST00000264951 | -0,510139867 |
| A_23_P153853  | NM_001398       | ECH1           | enoyl CoA hydratase 1, peroxisomal                              | ENST00000221418 | -0,510295218 |
| A_23_P42257   | NM_003897       | IER3           | immediate early response 3                                      | ENST00000376382 | -0,510331619 |
| A_21_P0013976 | XM_001723486    | LOC100130476   | uncharacterized LOC100130476                                    |                 | -0,510367882 |
| A_33_P3409238 | XR_110199       | LOC401286      | uncharacterized LOC401286                                       |                 | -0,510588256 |
| A_23_P48596   | NM_198232       | RNASE1         | ribonuclease, RNase A family, 1 (pancreatic)                    | ENST00000412779 | -0,510780848 |
| A_23_P46871   | NM_018344       | SLC29A3        | solute carrier family 29 (nucleoside transporters), member 3    | ENST00000373189 | -0,511072911 |

|                |                  |                |                                                             |                 |              |
|----------------|------------------|----------------|-------------------------------------------------------------|-----------------|--------------|
| A_33_P3313730  | NM_001145855     | SH3BP2         | SH3-domain binding protein 2                                | ENST00000356331 | -0,511372999 |
| A_23_P65442    | NM_006084        | IRF9           | interferon regulatory factor 9                              | ENST00000396864 | -0,511504931 |
| A_23_P34093    | NM_000402        | G6PD           | glucose-6-phosphate dehydrogenase                           | ENST00000369620 | -0,511512078 |
| A_21_P0013577  | AL117574         | XLOC_I2_014830 |                                                             |                 | -0,511538501 |
| A_33_P3253394  | NM_002287        | LAIR1          | leukocyte-associated immunoglobulin-like receptor 1         |                 | -0,511759563 |
| A_23_P150903   | NM_018099        | FAR2           | fatty acyl CoA reductase 2                                  | ENST00000182377 | -0,51190945  |
| A_23_P51487    | NM_018284        | GBP3           | guanylate binding protein 3                                 | ENST00000370481 | -0,512016525 |
| A_33_P3383816  | NR_024484        | LOC400657      | uncharacterized LOC400657                                   |                 | -0,512032068 |
| A_19_P00809624 | NM_001145191     | FAM200B        |                                                             | ENST00000504137 | -0,512214763 |
| A_21_P0008360  | TCONS_00022563   | XLOC_010881    |                                                             |                 | -0,512838846 |
| A_23_P151710   | NM_000956        | PTGER2         | prostaglandin E receptor 2 (subtype EP2), 53kDa             | ENST00000245457 | -0,513424549 |
| A_21_P0013122  | BC039678         | XLOC_I2_012378 |                                                             |                 | -0,513425673 |
| A_23_P117298   | NM_000131        | F7             | coagulation factor VII (serum prothrombin conversion accel  | ENST00000346342 | -0,513464217 |
| A_24_P68783    | NM_012275        | IL36RN         | interleukin 36 receptor antagonist                          | ENST00000393200 | -0,513911699 |
| A_23_P81934    | NM_025260        | C6orf25        | chromosome 6 open reading frame 25                          | ENST00000485548 | -0,513981401 |
| A_23_P57856    | NM_001130845     | BCL6           | B-cell CLL/lymphoma 6                                       | ENST00000419510 | -0,514081987 |
| A_21_P0010632  | TCONS_I2_0000138 | XLOC_I2_001011 |                                                             |                 | -0,514349696 |
| A_23_P68669    | NM_024944        | CHODL          | chondrolectin                                               | ENST00000338326 | -0,514639985 |
| A_33_P3210099  | NM_020778        | ALPK3          | alpha-kinase 3                                              | ENST00000258888 | -0,514783689 |
| A_21_P0007481  | NR_033878        | LOC387895      | uncharacterized LOC387895                                   |                 | -0,515391497 |
| A_33_P3401008  | NM_001085488     | TMEM150B       | transmembrane protein 150B                                  | ENST00000438693 | -0,515450833 |
| A_33_P3212555  | NM_000313        | PROS1          | protein S (alpha)                                           | ENST00000394236 | -0,515992063 |
| A_23_P142849   | NM_005168        | RND3           | Rho family GTPase 3                                         | ENST00000375734 | -0,516101827 |
| A_23_P99063    | NM_002345        | LUM            | lumican                                                     | ENST00000548071 | -0,516126258 |
| A_24_P295330   | NM_139246        | TSTD2          | thiosulfate sulfurtransferase (rhodanese)-like domain conta | ENST00000354801 | -0,516198202 |
| A_23_P147431   | NM_002350        | LYN            | v-yes-1 Yamaguchi sarcoma viral related oncogene homolog    | ENST00000519728 | -0,516382381 |
| A_21_P0013512  | THC2568453       | XLOC_I2_014504 |                                                             |                 | -0,516423859 |
| A_23_P50368    | NM_206818        | OSCAR          | osteoclast associated, immunoglobulin-like receptor         | ENST00000358375 | -0,51646014  |
| A_23_P94412    | NM_025239        | PDCD1LG2       | programmed cell death 1 ligand 2                            | ENST00000397747 | -0,5164642   |

|               |                 |             |                                                          |                 |              |
|---------------|-----------------|-------------|----------------------------------------------------------|-----------------|--------------|
| A_24_P125335  | NM_005408       | CCL13       | chemokine (C-C motif) ligand 13                          | ENST00000225844 | -0,516688494 |
| A_33_P3330209 | NM_001127232    | AUTS2       | autism susceptibility candidate 2                        | ENST00000403018 | -0,516710377 |
| A_23_P34375   | NM_003196       | TCEA3       | transcription elongation factor A (SII), 3               | ENST00000450454 | -0,516792692 |
| A_24_P81298   | NM_001123355    | PPP6C       | protein phosphatase 6, catalytic subunit                 | ENST00000373547 | -0,516794705 |
| A_33_P3255664 | ENST00000474046 | PBX1        | pre-B-cell leukemia homeobox 1                           | ENST00000474046 | -0,516838036 |
| A_23_P215048  | NM_014702       | KIAA0408    | KIAA0408                                                 | ENST00000368281 | -0,516911575 |
| A_23_P147431  | NM_002350       | LYN         | v-yes-1 Yamaguchi sarcoma viral related oncogene homolog | ENST00000519728 | -0,517256015 |
| A_32_P206899  | NM_020877       | DNAH2       | dynein, axonemal, heavy chain 2                          | ENST00000389173 | -0,517329531 |
| A_32_P8925    | NM_001012970    | C1orf100    | chromosome 1 open reading frame 100                      | ENST00000308105 | -0,517438821 |
| A_33_P3401753 | NM_005304       | FFAR3       | free fatty acid receptor 3                               | ENST00000454971 | -0,517625713 |
| A_23_P147431  | NM_002350       | LYN         | v-yes-1 Yamaguchi sarcoma viral related oncogene homolog | ENST00000519728 | -0,517946444 |
| A_33_P3390557 | NM_207510       | LCNL1       | lipocalin-like 1                                         | ENST00000482657 | -0,517994788 |
| A_33_P3351279 | NM_004767       | GPR37L1     | G protein-coupled receptor 37 like 1                     | ENST00000367282 | -0,518045891 |
| A_33_P3315223 | NM_006805       | HNRNPA0     | heterogeneous nuclear ribonucleoprotein A0               | ENST00000314940 | -0,518077802 |
| A_23_P94216   | NM_152271       | LONRF1      | LON peptidase N-terminal domain and ring finger 1        | ENST00000526680 | -0,51810263  |
| A_23_P381714  | NM_198584       | CA13        | carbonic anhydrase XIII                                  | ENST00000321764 | -0,518251189 |
| A_23_P54100   | NM_001437       | ESR2        | estrogen receptor 2 (ER beta)                            | ENST00000357782 | -0,51827814  |
| A_33_P3253687 | NR_003945       | GVINP1      | GTPase, very large interferon inducible pseudogene 1     |                 | -0,518323646 |
| A_21_P0007584 | TCONS_00020476  | XLOC_009810 |                                                          |                 | -0,518847312 |
| A_24_P287043  | NM_006435       | IFITM2      | interferon induced transmembrane protein 2 (1-8D)        | ENST00000527146 | -0,518943876 |
| A_33_P3268783 | NM_133463       | AMZ1        | archaelysin family metallopeptidase 1                    | ENST00000312371 | -0,519005883 |
| A_23_P72737   | NM_003641       | IFITM1      | interferon induced transmembrane protein 1 (9-27)        | ENST00000452428 | -0,519731544 |
| A_21_P0014939 | XR_133425       | BTBD9-AS1   | BTBD9 antisense RNA 1 (non-protein coding)               | ENST00000412822 | -0,519737018 |
| A_33_P3306413 | NM_001167986    | INCA1       | inhibitor of CDK, cyclin A1 interacting protein 1        | ENST00000396829 | -0,519799789 |
| A_21_P0005962 | ENST00000523946 | XLOC_007052 |                                                          | ENST00000523946 | -0,519897165 |
| A_23_P140563  | NM_001040655    | TTC23       | tetratricopeptide repeat domain 23                       | ENST00000494567 | -0,519905483 |
| A_33_P3267208 | NM_022048       | CSNK1G1     | casein kinase 1, gamma 1                                 | ENST00000303052 | -0,51999622  |
| A_33_P3360997 | NM_199292       | TH          | tyrosine hydroxylase                                     | ENST00000333684 | -0,520100789 |
| A_23_P73609   | NM_000266       | NDP         | Norrie disease (pseudoglioma)                            | ENST00000378062 | -0,520694661 |

|                |                 |              |                                                               |                 |              |
|----------------|-----------------|--------------|---------------------------------------------------------------|-----------------|--------------|
| A_23_P120103   | NM_002252       | KCNS3        | potassium voltage-gated channel, delayed-rectifier, subfam    | ENST00000403915 | -0,520696185 |
| A_21_P0006445  | ENST00000366134 | XLOC_008133  |                                                               | ENST00000366134 | -0,520940308 |
| A_23_P359043   | NM_001004065    | AKAP2        | A kinase (PRKA) anchor protein 2                              | ENST00000374530 | -0,520988282 |
| A_19_P00319057 | THC2545150      | P39192       |                                                               |                 | -0,521177283 |
| A_33_P3239282  | NM_004974       | KCNA2        | potassium voltage-gated channel, shaker-related subfamily,    | ENST00000316361 | -0,521253953 |
| A_23_P113111   | NM_000044       | AR           | androgen receptor                                             | ENST00000544984 | -0,521311194 |
| A_23_P154208   | NM_017567       | NAGK         | N-acetylglucosamine kinase                                    | ENST00000455197 | -0,5213689   |
| A_33_P3260445  | ENST00000367088 | DYNLT1       | dynein, light chain, Tctex-type 1                             | ENST00000367088 | -0,521416536 |
| A_24_P924862   | NM_213589       | RAPH1        | Ras association (RalGDS/AF-6) and pleckstrin homology don     | ENST00000319170 | -0,521429604 |
| A_23_P399501   | NM_182470       | PKM2         | pyruvate kinase, muscle                                       | ENST00000449901 | -0,521512213 |
| A_33_P3295358  | NM_139314       | ANGPTL4      | angiopoietin-like 4                                           | ENST00000301455 | -0,521581939 |
| A_23_P109055   | NM_033550       | TP53RK       | TP53 regulating kinase                                        | ENST00000372102 | -0,521630833 |
| A_21_P0001407  | TCONS_00001250  | XLOC_000535  |                                                               |                 | -0,521731664 |
| A_23_P210886   | NM_138578       | BCL2L1       | BCL2-like 1                                                   | ENST00000420653 | -0,52217406  |
| A_21_P0007473  | TCONS_00020154  | XLOC_009604  |                                                               |                 | -0,522429643 |
| A_21_P0000576  | NR_029376       | LOC100294362 | uncharacterized LOC100294362                                  |                 | -0,522522574 |
| A_23_P134454   | NM_001753       | CAV1         | caveolin 1, caveolae protein, 22kDa                           | ENST00000341049 | -0,522611947 |
| A_24_P567298   | NM_004909       | CSAG2        | CSAG family, member 2                                         | ENST00000356911 | -0,522646795 |
| A_33_P3351955  | NM_201282       | EGFR         | epidermal growth factor receptor                              | ENST00000342916 | -0,522771443 |
| A_23_P210708   | NM_001040022    | SIRPA        | signal-regulatory protein alpha                               | ENST00000358771 | -0,523410014 |
| A_23_P105862   | NM_023037       | FRY          | furry homolog (Drosophila)                                    | ENST00000380257 | -0,523651014 |
| A_23_P164253   | NR_002181       | PPY2         | pancreatic polypeptide 2                                      |                 | -0,523750467 |
| A_33_P3297050  | NM_033087       | ALG2         | asparagine-linked glycosylation 2, alpha-1,3-mannosyltransl   | ENST00000238477 | -0,523874428 |
| A_23_P55998    | NM_005628       | SLC1A5       | solute carrier family 1 (neutral amino acid transporter), mei | ENST00000306894 | -0,523954758 |
| A_21_P0005092  | ENST00000439703 | XLOC_005935  |                                                               | ENST00000439703 | -0,523963167 |
| A_21_P0006016  | ENST00000424682 | XLOC_007390  |                                                               | ENST00000424682 | -0,524258311 |
| A_21_P0007639  | TCONS_00020585  | XLOC_009899  |                                                               |                 | -0,524349168 |
| A_33_P3691168  | NM_001242638    | IL31RA       | interleukin 31 receptor A                                     | ENST00000354961 | -0,524494158 |
| A_33_P3324980  | NM_032199       | ARID5B       | AT rich interactive domain 5B (MRF1-like)                     | ENST00000309334 | -0,524548736 |



|                |                 |             |                                                                |                 |  |              |
|----------------|-----------------|-------------|----------------------------------------------------------------|-----------------|--|--------------|
| A_21_P0002156  | TCONS_00003535  | XLOC_001309 |                                                                |                 |  | -0,524603724 |
| A_23_P147431   | NM_002350       | LYN         | v-yes-1 Yamaguchi sarcoma viral related oncogene homolog       | ENST00000519728 |  | -0,524685723 |
| A_23_P113393   | NM_017413       | APLN        | apelin                                                         | ENST00000307484 |  | -0,52482189  |
| A_32_P75264    | NM_178505       | TMEM26      | transmembrane protein 26                                       | ENST00000399298 |  | -0,525060953 |
| A_23_P122077   | NM_016591       | GCNT4       | glucosaminyl (N-acetyl) transferase 4, core 2                  | ENST00000322348 |  | -0,525158533 |
| A_23_P351148   | NM_053282       | SH2D1B      | SH2 domain containing 1B                                       | ENST00000359567 |  | -0,52531226  |
| A_19_P00317023 | AK129745        | Q6IHG2      |                                                                |                 |  | -0,525410504 |
| A_33_P3259917  | NM_052890       | PGLYRP2     | peptidoglycan recognition protein 2                            | ENST00000340880 |  | -0,525496869 |
| A_23_P147431   | NM_002350       | LYN         | v-yes-1 Yamaguchi sarcoma viral related oncogene homolog       | ENST00000519728 |  | -0,525514306 |
| A_23_P109171   | NM_001195       | BFSP1       | beaded filament structural protein 1, filensin                 | ENST00000536626 |  | -0,525526417 |
| A_33_P3239532  | NM_017715       | ZNF3        | zinc finger protein 3                                          | ENST00000413658 |  | -0,525681168 |
| A_19_P00320155 | NR_023915       | IPW         | imprinted in Prader-Willi syndrome (non-protein coding)        | ENST00000549804 |  | -0,525728197 |
| A_33_P3354678  | NR_002777       | TRIM78P     | tripartite motif containing 78, pseudogene                     |                 |  | -0,526002837 |
| A_24_P81900    | NM_006931       | SLC2A3      | solute carrier family 2 (facilitated glucose transporter), men | ENST00000486749 |  | -0,526031412 |
| A_33_P3324839  | NM_006772       | SYNGAP1     | synaptic Ras GTPase activating protein 1                       | ENST00000418600 |  | -0,526302406 |
| A_33_P3333982  | NM_022359       | PDE4DIP     | phosphodiesterase 4D interacting protein                       | ENST00000527063 |  | -0,526412885 |
| A_23_P430558   | NM_000751       | CHRND       | cholinergic receptor, nicotinic, delta                         | ENST00000543200 |  | -0,526884546 |
| A_21_P0000972  | ENST00000431986 | XLOC_000182 |                                                                | ENST00000431986 |  | -0,526992859 |
| A_21_P0009723  | TCONS_00027056  | XLOC_013099 |                                                                |                 |  | -0,527003638 |
| A_33_P3440636  | AK091759        | LOC286071   | uncharacterized LOC286071                                      |                 |  | -0,527195529 |
| A_33_P3315779  | NM_001165136    | HERC6       | hect domain and RLD 6                                          | ENST00000273960 |  | -0,527592951 |
| A_21_P0009435  | TCONS_00026226  | XLOC_012601 |                                                                |                 |  | -0,527608659 |
| A_21_P0008879  | BX445613        | XLOC_011882 |                                                                |                 |  | -0,52772277  |
| A_23_P374082   | NM_033274       | ADAM19      | ADAM metallopeptidase domain 19                                | ENST00000257527 |  | -0,527956712 |
| A_33_P3383326  | NM_057159       | LPAR1       | lysophosphatidic acid receptor 1                               | ENST00000374430 |  | -0,528107362 |
| A_23_P147431   | NM_002350       | LYN         | v-yes-1 Yamaguchi sarcoma viral related oncogene homolog       | ENST00000519728 |  | -0,528127178 |
| A_33_P3310989  | NM_014847       | UBAP2L      | ubiquitin associated protein 2-like                            | ENST00000433006 |  | -0,528495903 |
| A_19_P00320675 | NR_034179       | LOC653712   |                                                                | ENST00000480931 |  | -0,528633591 |
| A_23_P55990    | NM_003827       | NAPA        | N-ethylmaleimide-sensitive factor attachment protein, alpha    | ENST00000263354 |  | -0,528650593 |

|               |                   |                |                                                                     |                 |  |              |
|---------------|-------------------|----------------|---------------------------------------------------------------------|-----------------|--|--------------|
| A_21_P0009948 | TCONS_00028129    | XLOC_013487    |                                                                     |                 |  | -0,528755467 |
| A_21_P0007449 | TCONS_00019986    | XLOC_009261    |                                                                     |                 |  | -0,528976107 |
| A_23_P421401  | NM_002609         | PDGFRB         | platelet-derived growth factor receptor, beta polypeptide           | ENST00000544453 |  | -0,52926315  |
| A_33_P3369567 | NM_001242932      | LSP1           | lymphocyte-specific protein 1                                       | ENST00000484895 |  | -0,529266051 |
| A_23_P108751  | NM_001039492      | FHL2           | four and a half LIM domains 2                                       | ENST00000358129 |  | -0,529422068 |
| A_33_P3413815 | NR_004405         | LAMB2P1        | laminin, beta 2 pseudogene 1                                        |                 |  | -0,52952612  |
| A_21_P0012700 | TCONS_I2_0002147: | XLOC_I2_011407 |                                                                     |                 |  | -0,52955594  |
| A_23_P147431  | NM_002350         | LYN            | v-yes-1 Yamaguchi sarcoma viral related oncogene homolog            | ENST00000519728 |  | -0,529640035 |
| A_23_P111978  | NM_016601         | KCNK9          | potassium channel, subfamily K, member 9                            | ENST00000303015 |  | -0,529644959 |
| A_21_P0009215 | TCONS_00025293    | XLOC_012095    |                                                                     |                 |  | -0,529743356 |
| A_23_P425304  | NM_016169         | SUFU           | suppressor of fused homolog (Drosophila)                            | ENST00000369902 |  | -0,529894077 |
| A_23_P152002  | NM_004049         | BCL2A1         | BCL2-related protein A1                                             | ENST00000267953 |  | -0,529921723 |
| A_24_P120115  | NM_003879         | CFLAR          | CASP8 and FADD-like apoptosis regulator                             | ENST00000340870 |  | -0,529929934 |
| A_33_P3369371 | NM_002084         | GPX3           | glutathione peroxidase 3 (plasma)                                   | ENST00000388825 |  | -0,53001584  |
| A_33_P3272938 | NM_021209         | NLRC4          | NLR family, CARD domain containing 4                                | ENST00000342905 |  | -0,530042514 |
| A_21_P0000065 | NM_001166696      | SLC1A3         | solute carrier family 1 (glial high affinity glutamate transporter) | ENST00000512374 |  | -0,530058169 |
| A_21_P0009999 | TCONS_00028299    | XLOC_013639    |                                                                     |                 |  | -0,530123343 |
| A_33_P3285992 | AK125618          | VKORC1         | vitamin K epoxide reductase complex, subunit 1                      | ENST00000498155 |  | -0,530298859 |
| A_23_P101871  | NM_024907         | FBXO17         | F-box protein 17                                                    | ENST00000292852 |  | -0,530542362 |
| A_33_P3280320 | NM_001195127      | LOC100288524   | forkhead box L1-like                                                |                 |  | -0,530754243 |
| A_32_P172848  | NM_000167         | GK             | glycerol kinase                                                     | ENST00000471362 |  | -0,531111498 |
| A_23_P133095  | NM_014247         | RAPGEF2        | Rap guanine nucleotide exchange factor (GEF) 2                      | ENST00000264431 |  | -0,531645464 |
| A_21_P0004691 | ENST00000434437   | XLOC_005480    |                                                                     | ENST00000434437 |  | -0,531956454 |
| A_21_P0004420 | TCONS_00010402    | XLOC_004924    |                                                                     |                 |  | -0,532167551 |
| A_33_P3562810 | XR_132545         | LOC286149      | uncharacterized LOC286149                                           |                 |  | -0,532262879 |
| A_33_P3246623 | NM_206886         | CCDC18         | coiled-coil domain containing 18                                    | ENST00000557479 |  | -0,532279373 |
| A_23_P210886  | NM_138578         | BCL2L1         | BCL2-like 1                                                         | ENST00000420653 |  | -0,532414159 |
| A_33_P3371588 | NM_023934         | FUNDC2         | FUN14 domain containing 2                                           | ENST00000369498 |  | -0,53249312  |
| A_33_P3223467 | NM_025054         | VCPIP1         | valosin containing protein (p97)/p47 complex interacting protein    | ENST00000310421 |  | -0,532537889 |

|                |                 |                |                                                          |                 |              |
|----------------|-----------------|----------------|----------------------------------------------------------|-----------------|--------------|
| A_23_P323196   | NR_027042       | MDS2           | myelodysplastic syndrome 2 translocation associated      | ENST00000374555 | -0,532782161 |
| A_21_P0009752  | TCONS_00027258  | XLOC_013282    |                                                          |                 | -0,532895862 |
| A_33_P3867584  | NR_038863       | LOC285758      | uncharacterized LOC285758                                |                 | -0,532937888 |
| A_23_P379200   | NM_175736       | FMNL3          | formin-like 3                                            | ENST00000335154 | -0,533085401 |
| A_33_P3270271  | BC029817        | LOC440386      | uncharacterized LOC440386                                |                 | -0,533138071 |
| A_33_P3293858  | NM_001033602    | MTUS2          | microtubule associated tumor suppressor candidate 2      |                 | -0,533193022 |
| A_19_P00321148 | AK055877        | LOC100506328   | uncharacterized LOC100506328                             |                 | -0,533277966 |
| A_23_P69840    | NM_080670       | SLC35A4        | solute carrier family 35, member A4                      | ENST00000432254 | -0,533403404 |
| A_24_P202581   | NM_199002       | ARHGEF1        | Rho guanine nucleotide exchange factor (GEF) 1           | ENST00000378152 | -0,533437824 |
| A_23_P4254     | NM_005208       | CRYBA1         | crystallin, beta A1                                      | ENST00000225387 | -0,533509966 |
| A_23_P210886   | NM_138578       | BCL2L1         | BCL2-like 1                                              | ENST00000420653 | -0,533524644 |
| A_23_P54469    | NM_145805       | ISL2           | ISL LIM homeobox 2                                       | ENST00000290759 | -0,533826601 |
| A_32_P30649    | NM_004454       | ETV5           | ets variant 5                                            | ENST00000306376 | -0,533872627 |
| A_23_P113111   | NM_000044       | AR             | androgen receptor                                        | ENST00000544984 | -0,533920023 |
| A_23_P142849   | NM_005168       | RND3           | Rho family GTPase 3                                      | ENST00000375734 | -0,533950405 |
| A_21_P0006726  | ENST00000418372 | XLOC_008700    |                                                          | ENST00000418372 | -0,533966798 |
| A_33_P3230254  | NM_022346       | NCAPG          | non-SMC condensin I complex, subunit G                   | ENST00000251496 | -0,534068717 |
| A_21_P0009341  | NR_030732       | LOC645638      | WDNM1-like pseudogene                                    |                 | -0,534215611 |
| A_21_P0012251  | THC2506559      | XLOC_I2_009303 |                                                          |                 | -0,534340622 |
| A_23_P113351   | NM_004684       | SPARCL1        | SPARC-like 1 (hevin)                                     | ENST00000418378 | -0,534685105 |
| A_21_P0005189  | XR_108720       | LOC100507642   | uncharacterized LOC100507642                             |                 | -0,53476066  |
| A_24_P680657   | NM_001008391    | CCDC73         | coiled-coil domain containing 73                         | ENST00000335185 | -0,535693031 |
| A_23_P38537    | NM_005557       | KRT16          | keratin 16                                               | ENST00000301653 | -0,535861308 |
| A_23_P30435    | NM_006058       | TNIP1          | TNFAIP3 interacting protein 1                            | ENST00000417127 | -0,535926486 |
| A_23_P167920   | NM_005618       | DLL1           | delta-like 1 (Drosophila)                                | ENST00000366756 | -0,535956243 |
| A_23_P38427    | NM_032932       | RAB11FIP4      | RAB11 family interacting protein 4 (class II)            | ENST00000325874 | -0,536067625 |
| A_23_P147431   | NM_002350       | LYN            | v-yes-1 Yamaguchi sarcoma viral related oncogene homolog | ENST00000519728 | -0,53635472  |
| A_21_P0014218  | XR_108901       | LOC100507186   | uncharacterized LOC100507186                             |                 | -0,536554311 |
| A_23_P101246   | NM_001163922    | VSIG10L        | V-set and immunoglobulin domain containing 10 like       | ENST00000335624 | -0,536565624 |

|               |                  |                |                                                             |                 |              |
|---------------|------------------|----------------|-------------------------------------------------------------|-----------------|--------------|
| A_33_P3367596 | NM_001830        | CLCN4          | chloride channel 4                                          | ENST00000380829 | -0,536853626 |
| A_23_P122052  | NM_001008397     | GPX8           | glutathione peroxidase 8 (putative)                         | ENST00000503787 | -0,536891147 |
| A_21_P0013071 | TCONS_I2_0002467 | XLOC_I2_012925 |                                                             |                 | -0,537099796 |
| A_21_P0010782 | NR_037845        | LOC100506023   | uncharacterized LOC100506023                                |                 | -0,537425439 |
| A_33_P3237005 | NR_002438        | ZFAT-AS1       | ZFAT antisense RNA 1 (non-protein coding)                   | ENST00000505776 | -0,537426558 |
| A_23_P202345  | NM_032804        | ADO            | 2-aminoethanethiol (cysteamine) dioxygenase                 | ENST00000373783 | -0,538067031 |
| A_21_P0001336 | ENST00000479252  | LRRC8C         | leucine rich repeat containing 8 family, member C           | ENST00000479252 | -0,538210774 |
| A_24_P386746  | NM_031491        | RBP5           | retinol binding protein 5, cellular                         | ENST00000543045 | -0,538281666 |
| A_32_P222684  | NM_001136239     | PRDM6          | PR domain containing 6                                      | ENST00000407847 | -0,538312822 |
| A_21_P0013371 | XR_108746        | LOC100506098   | uncharacterized LOC100506098                                |                 | -0,538332485 |
| A_33_P3236734 | NM_001204118     | CLEC17A        | C-type lectin domain family 17, member A                    | ENST00000397439 | -0,538411814 |
| A_23_P126623  | NM_002631        | PGD            | phosphogluconate dehydrogenase                              | ENST00000541529 | -0,538507233 |
| A_23_P210886  | NM_138578        | BCL2L1         | BCL2-like 1                                                 | ENST00000420653 | -0,538709371 |
| A_33_P3405168 | NM_172250        | MMAA           | methylmalonic aciduria (cobalamin deficiency) cblA type     | ENST00000281317 | -0,538776531 |
| A_21_P0009754 | TCONS_00027265   | XLOC_013282    |                                                             |                 | -0,538940055 |
| A_21_P0001680 | TCONS_00002039   | XLOC_000208    |                                                             |                 | -0,539010895 |
| A_23_P121480  | NM_001004196     | CD200          | CD200 molecule                                              | ENST00000478595 | -0,539117243 |
| A_33_P3410589 | NM_153690        | FAM43A         | family with sequence similarity 43, member A                | ENST00000329759 | -0,539264343 |
| A_32_P846696  | NR_027000        | LOC349196      | uncharacterized LOC349196                                   |                 | -0,539526436 |
| A_33_P3543288 | XR_109407        | FLJ42842       | uncharacterized FLJ42842                                    |                 | -0,539672552 |
| A_24_P219474  | NM_144677        | MGAT5B         | mannosyl (alpha-1,6-)-glycoprotein beta-1,6-N-acetyl-gluco: | ENST00000301618 | -0,540089622 |
| A_23_P117873  | NM_012125        | CHRM5          | cholinergic receptor, muscarinic 5                          | ENST00000383263 | -0,540143827 |
| A_23_P166248  | NM_004414        | RCAN1          | regulator of calcineurin 1                                  | ENST00000443408 | -0,540457981 |
| A_23_P107454  | NM_031958        | KRTAP3-1       | keratin associated protein 3-1                              | ENST00000391588 | -0,540499665 |
| A_32_P72110   | NM_006505        | PVR            | poliovirus receptor                                         | ENST00000344956 | -0,540599023 |
| A_33_P3386547 | NM_152386        | SGPP2          | sphingosine-1-phosphate phosphatase 2                       | ENST00000321276 | -0,541249761 |
| A_21_P0007586 | ENST00000553247  | XLOC_009810    |                                                             | ENST00000553247 | -0,54135803  |
| A_23_P77545   | NM_001053        | SSTR5          | somatostatin receptor 5                                     | ENST00000539762 | -0,541433496 |
| A_23_P147431  | NM_002350        | LYN            | v-yes-1 Yamaguchi sarcoma viral related oncogene homolog    | ENST00000519728 | -0,541628858 |

|               |                |             |                                                                |                 |              |
|---------------|----------------|-------------|----------------------------------------------------------------|-----------------|--------------|
| A_23_P502832  | NM_006047      | RBM12       | RNA binding motif protein 12                                   | ENST00000374114 | -0,542007978 |
| A_24_P126628  | NM_015257      | TMEM194A    | transmembrane protein 194A                                     | ENST00000300128 | -0,542166942 |
| A_33_P3400374 | NM_001037335   | PRIC285     | peroxisomal proliferator-activated receptor A interacting cc   | ENST00000427522 | -0,542179029 |
| A_23_P210886  | NM_138578      | BCL2L1      | BCL2-like 1                                                    | ENST00000420653 | -0,542202809 |
| A_24_P308229  | NM_001039775   | AIM1L       | absent in melanoma 1-like                                      | ENST00000520372 | -0,542441586 |
| A_23_P67042   | NM_017947      | MOCOS       | molybdenum cofactor sulfurase                                  | ENST00000261326 | -0,542545093 |
| A_21_P0007675 | TCONS_00020666 | XLOC_009969 |                                                                |                 | -0,542933047 |
| A_33_P3753757 | AK095652       | LOC158402   | uncharacterized LOC158402                                      |                 | -0,542987867 |
| A_23_P366098  | NM_207308      | NUP210L     | nucleoporin 210kDa-like                                        | ENST00000271854 | -0,543084543 |
| A_33_P3214035 | NM_000675      | ADORA2A     | adenosine A2a receptor                                         | ENST00000436735 | -0,543174696 |
| A_23_P19333   | NM_018643      | TREM1       | triggering receptor expressed on myeloid cells 1               | ENST00000244709 | -0,543284761 |
| A_33_P3278941 | NM_001048205   | REC8        | REC8 homolog (yeast)                                           | ENST00000311457 | -0,543425866 |
| A_33_P3243524 | NM_001164389   | RAPGEF6     | Rap guanine nucleotide exchange factor (GEF) 6                 | ENST00000308008 | -0,543489834 |
| A_23_P156667  | NM_002714      | PPP1R10     | protein phosphatase 1, regulatory subunit 10                   | ENST00000376511 | -0,543683685 |
| A_24_P219156  | NM_001077351   | RBM23       | RNA binding motif protein 23                                   | ENST00000556186 | -0,543854379 |
| A_23_P107454  | NM_031958      | KRTAP3-1    | keratin associated protein 3-1                                 | ENST00000391588 | -0,543866028 |
| A_33_P3220025 | NM_001145004   | GOLGA6L6    | golgin A6 family-like 6                                        | ENST00000424531 | -0,544137364 |
| A_23_P342000  | NM_144770      | RBM11       | RNA binding motif protein 11                                   | ENST00000468643 | -0,544253206 |
| A_23_P120467  | NM_199427      | ZFP64       | zinc finger protein 64 homolog (mouse)                         | ENST00000361387 | -0,544530532 |
| A_21_P0002252 | TCONS_00004838 | XLOC_001558 |                                                                |                 | -0,544577933 |
| A_24_P174793  | NM_000439      | PCSK1       | proprotein convertase subtilisin/kexin type 1                  | ENST00000311106 | -0,544616469 |
| A_23_P38468   | NM_014604      | TAX1BP3     | Tax1 (human T-cell leukemia virus type I) binding protein 3    | ENST00000550383 | -0,544688145 |
| A_23_P104972  | NM_023945      | MS4A5       | membrane-spanning 4-domains, subfamily A, member 5             | ENST00000300190 | -0,54501841  |
| A_24_P378019  | NM_004031      | IRF7        | interferon regulatory factor 7                                 | ENST00000534109 | -0,545157038 |
| A_23_P3532    | NM_004862      | LITAF       | lipopolysaccharide-induced TNF factor                          | ENST00000381810 | -0,545263    |
| A_24_P313418  | NM_002990      | CCL22       | chemokine (C-C motif) ligand 22                                | ENST00000219235 | -0,545512132 |
| A_21_P0005104 | THC2699745     | XLOC_005136 |                                                                |                 | -0,54568871  |
| A_33_P3210059 | NM_005877      | SF3A1       | splicing factor 3a, subunit 1, 120kDa                          | ENST00000439242 | -0,545935395 |
| A_23_P501985  | NM_172249      | CSF2RA      | colony stimulating factor 2 receptor, alpha, low-affinity (gra | ENST00000419094 | -0,545936576 |



|                |                 |              |                                                                 |                 |              |
|----------------|-----------------|--------------|-----------------------------------------------------------------|-----------------|--------------|
| A_23_P332584   | NM_015237       | KIAA1107     | KIAA1107                                                        | ENST00000370378 | -0,546004631 |
| A_21_P0003448  | ENST00000507932 | XLOC_003890  |                                                                 | ENST00000507932 | -0,546116547 |
| A_23_P25566    | NM_004951       | GPR183       | G protein-coupled receptor 183                                  | ENST00000376414 | -0,546172788 |
| A_33_P3226825  | NM_080864       | RLN3         | relaxin 3                                                       | ENST00000431365 | -0,546578597 |
| A_21_P0006086  | ENST00000425666 | XLOC_007769  |                                                                 | ENST00000425666 | -0,546629187 |
| A_33_P3887081  | NR_033890       | LOC338817    | uncharacterized LOC338817                                       |                 | -0,546638897 |
| A_33_P3281795  | NM_007283       | MGLL         | monoglyceride lipase                                            | ENST00000265052 | -0,546800648 |
| A_24_P122137   | NM_002309       | LIF          | leukemia inhibitory factor (cholinergic differentiation factor) | ENST00000249075 | -0,547135291 |
| A_33_P3234031  | AK125981        | LRRC37BP1    | leucine rich repeat containing 37B pseudogene 1                 |                 | -0,547328079 |
| A_32_P143000   | NM_015307       | FAM189A1     | family with sequence similarity 189, member A1                  | ENST00000261275 | -0,547393263 |
| A_21_P0011821  | NM_207328       | GPAT2        | glycerol-3-phosphate acyltransferase 2, mitochondrial           | ENST00000471661 | -0,547574896 |
| A_24_P925664   | NM_002392       | MDM2         | Mdm2 p53 binding protein homolog (mouse)                        | ENST00000544648 | -0,547647428 |
| A_33_P3226832  | NM_001993       | F3           | coagulation factor III (thromboplastin, tissue factor)          | ENST00000370207 | -0,547779009 |
| A_19_P00320996 | THC2525908      | P39188       |                                                                 |                 | -0,547832998 |
| A_21_P0006733  | ENST00000457632 | XLOC_008721  |                                                                 | ENST00000457632 | -0,54785957  |
| A_23_P38346    | NM_024119       | DHX58        | DEXH (Asp-Glu-X-His) box polypeptide 58                         | ENST00000423748 | -0,54788916  |
| A_24_P365526   | NM_002110       | HCK          | hemopoietic cell kinase                                         | ENST00000375862 | -0,547990863 |
| A_32_P473302   | NR_015375       | FLJ35024     | uncharacterized LOC401491                                       |                 | -0,548478385 |
| A_32_P456318   | NM_080743       | SRSF12       | serine/arginine-rich splicing factor 12                         | ENST00000452027 | -0,548654767 |
| A_33_P3237393  | NM_003440       | ZNF140       | zinc finger protein 140                                         |                 | -0,548682789 |
| A_23_P257815   | NM_005582       | CD180        | CD180 molecule                                                  | ENST00000256447 | -0,548733919 |
| A_23_P218412   | NM_004890       | SPAG7        | sperm associated antigen 7                                      | ENST00000206020 | -0,548772464 |
| A_23_P74229    | NM_032017       | STK40        | serine/threonine kinase 40                                      | ENST00000359297 | -0,548880353 |
| A_23_P145694   | NM_001673       | ASNS         | asparagine synthetase (glutamine-hydrolyzing)                   | ENST00000394308 | -0,549081028 |
| A_19_P00318505 | NR_026961       | LOC284837    | uncharacterized LOC284837                                       | ENST00000400385 | -0,54924035  |
| A_23_P111737   | NM_005856       | RAMP3        | receptor (G protein-coupled) activity modifying protein 3       | ENST00000242249 | -0,549417775 |
| A_21_P0013940  | XM_002343061    | LOC100287223 | uncharacterized LOC100287223                                    |                 | -0,549486101 |
| A_33_P3376636  | NM_001017989    | OPA3         | optic atrophy 3 (autosomal recessive, with chorea and spas)     | ENST00000323060 | -0,549596834 |
| A_23_P310274   | NM_002770       | PRSS2        | protease, serine, 2 (trypsin 2)                                 |                 | -0,549711711 |

|               |              |             |                                                     |                 |              |
|---------------|--------------|-------------|-----------------------------------------------------|-----------------|--------------|
| A_23_P120467  | NM_199427    | ZFP64       | zinc finger protein 64 homolog (mouse)              | ENST00000361387 | -0,549717043 |
| A_33_P3215282 | NM_032538    | TTBK1       | tau tubulin kinase 1                                | ENST00000259750 | -0,550254367 |
| A_23_P113111  | NM_000044    | AR          | androgen receptor                                   | ENST00000544984 | -0,550286712 |
| A_23_P352266  | NM_000633    | BCL2        | B-cell CLL/lymphoma 2                               | ENST00000398117 | -0,550433609 |
| A_23_P111995  | NM_002318    | LOXL2       | lysyl oxidase-like 2                                | ENST00000389131 | -0,550512902 |
| A_23_P122052  | NM_001008397 | GPX8        | glutathione peroxidase 8 (putative)                 | ENST00000503787 | -0,550646219 |
| A_33_P3395028 | NR_026934    | LOC152225   | uncharacterized LOC152225                           | ENST00000483840 | -0,550843567 |
| A_21_P0008723 | THC2699280   | XLOC_011430 |                                                     |                 | -0,550923736 |
| A_33_P3309984 | NM_000221    | KHK         | ketohexokinase (fructokinase)                       | ENST00000260599 | -0,551006891 |
| A_23_P334955  | NM_053279    | FAM167A     | family with sequence similarity 167, member A       | ENST00000284486 | -0,551039603 |
| A_23_P210886  | NM_138578    | BCL2L1      | BCL2-like 1                                         | ENST00000420653 | -0,551068622 |
| A_24_P269062  | NM_030964    | SPRY4       | sprouty homolog 4 (Drosophila)                      | ENST00000344120 | -0,551347207 |
| A_33_P3421728 | NM_001346    | DGKG        | diacylglycerol kinase, gamma 90kDa                  | ENST00000265022 | -0,551382387 |
| A_24_P90881   | NM_024922    | CES3        | carboxylesterase 3                                  | ENST00000303334 | -0,551654955 |
| A_23_P215634  | NM_001013398 | IGFBP3      | insulin-like growth factor binding protein 3        | ENST00000438491 | -0,55168472  |
| A_33_P3331366 | NM_005082    | TRIM25      | tripartite motif containing 25                      | ENST00000316881 | -0,552136715 |
| A_23_P218626  | NM_080741    | NEU4        | sialidase 4                                         | ENST00000472793 | -0,552174952 |
| A_23_P161152  | NM_014317    | PDSS1       | prenyl (decaprenyl) diphosphate synthase, subunit 1 | ENST00000470978 | -0,552343277 |
| A_23_P52647   | NM_006795    | EHD1        | EH-domain containing 1                              | ENST00000359393 | -0,552737833 |
| A_24_P7121    | NM_024677    | NSUN7       | NOP2/Sun domain family, member 7                    | ENST00000381782 | -0,552807377 |
| A_32_P91902   | NM_030927    | TSPAN14     | tetraspanin 14                                      | ENST00000429989 | -0,552977247 |
| A_23_P152406  | NM_032330    | CAPNS2      | calpain, small subunit 2                            | ENST00000457326 | -0,55310547  |
| A_23_P12082   | NM_001025199 | CHI3L2      | chitinase 3-like 2                                  | ENST00000369748 | -0,553117714 |
| A_23_P204847  | NM_002298    | LCP1        | lymphocyte cytosolic protein 1 (L-plastin)          | ENST00000398576 | -0,5531389   |
| A_23_P327140  | NM_020914    | RNF213      | ring finger protein 213                             | ENST00000411702 | -0,553327648 |
| A_23_P104972  | NM_023945    | MS4A5       | membrane-spanning 4-domains, subfamily A, member 5  | ENST00000300190 | -0,553476313 |
| A_24_P829183  | XR_108575    | FLJ32255    | uncharacterized LOC643977                           |                 | -0,553662613 |
| A_23_P306867  | NM_173199    | NR4A3       | nuclear receptor subfamily 4, group A, member 3     | ENST00000338488 | -0,553771482 |
| A_24_P326491  | NM_173576    | MKX         | mohawk homeobox                                     | ENST00000419761 | -0,554051927 |

|               |                 |              |                                                               |                 |  |              |
|---------------|-----------------|--------------|---------------------------------------------------------------|-----------------|--|--------------|
| A_21_P0007050 | TCONS_00018686  | XLOC_008416  |                                                               |                 |  | -0,554431113 |
| A_21_P0001676 | THC2624247      | XLOC_000166  |                                                               |                 |  | -0,554589411 |
| A_23_P13907   | NM_000618       | IGF1         | insulin-like growth factor 1 (somatomedin C)                  | ENST00000481539 |  | -0,554628617 |
| A_33_P3307133 | NM_021956       | GRIK2        | glutamate receptor, ionotropic, kainate 2                     | ENST00000403289 |  | -0,554683901 |
| A_23_P69109   | NM_021105       | PLSCR1       | phospholipid scramblase 1                                     | ENST00000448205 |  | -0,554970359 |
| A_32_P12104   | NM_022662       | ANAPC1       | anaphase promoting complex subunit 1                          | ENST00000341068 |  | -0,555181841 |
| A_21_P0013991 | ENST00000426006 | LOC100509638 |                                                               | ENST00000426006 |  | -0,555194172 |
| A_33_P3401093 | NM_174899       | FBXO36       | F-box protein 36                                              | ENST00000283946 |  | -0,555360217 |
| A_24_P91094   | NM_006695       | RUNDC3A      | RUN domain containing 3A                                      | ENST00000225441 |  | -0,555475276 |
| A_21_P0003821 | TCONS_00008716  | XLOC_004229  |                                                               |                 |  | -0,556409036 |
| A_21_P0002493 | THC2716004      | XLOC_002277  |                                                               |                 |  | -0,556693198 |
| A_21_P0014154 | XR_108621       | LOC100507367 | uncharacterized LOC100507367                                  |                 |  | -0,556784888 |
| A_23_P387552  | NM_000966       | RARG         | retinoic acid receptor, gamma                                 | ENST00000425354 |  | -0,557565272 |
| A_23_P110624  | NM_001332       | CTNND2       | catenin (cadherin-associated protein), delta 2 (neural plakob | ENST00000538638 |  | -0,558062518 |
| A_23_P45087   | NM_016220       | ZNF107       | zinc finger protein 107                                       | ENST00000423627 |  | -0,55852042  |
| A_23_P163697  | NM_016524       | SYT17        | synaptotagmin XVII                                            | ENST00000355377 |  | -0,558537521 |
| A_23_P116512  | NM_024841       | PRR5L        | proline rich 5 like                                           | ENST00000389693 |  | -0,55862564  |
| A_33_P3406572 | AK091704        | LOC149773    | uncharacterized LOC149773                                     |                 |  | -0,558649836 |
| A_23_P161698  | NM_002422       | MMP3         | matrix metalloproteinase 3 (stromelysin 1, progelatinase)     | ENST00000299855 |  | -0,55875765  |
| A_24_P48204   | NM_003004       | SECTM1       | secreted and transmembrane 1                                  | ENST00000269389 |  | -0,559028176 |
| A_23_P100386  | NM_152456       | IL34         | interleukin 34                                                | ENST00000429149 |  | -0,559337385 |
| A_21_P0000004 | NM_001099791    | SYS1         | SYS1 Golgi-localized integral membrane protein homolog (S     | ENST00000426004 |  | -0,55951458  |
| A_21_P0007881 | TCONS_00021347  | XLOC_010117  |                                                               |                 |  | -0,559629394 |
| A_24_P12435   | NM_181782       | NCOA7        | nuclear receptor coactivator 7                                | ENST00000368357 |  | -0,559724367 |
| A_33_P3397763 | NM_003811       | TNFSF9       | tumor necrosis factor (ligand) superfamily, member 9          | ENST00000245817 |  | -0,559950404 |
| A_33_P3345479 | NR_027033       | MIRLET7BHG   | MIRLET7B host gene (non-protein coding)                       | ENST00000435439 |  | -0,560230157 |
| A_32_P86763   | NM_004613       | TGM2         | transglutaminase 2 (C polypeptide, protein-glutamine-gamr     | ENST00000361475 |  | -0,560499655 |
| A_23_P102950  | NM_080860       | RSPH1        | radial spoke head 1 homolog (Chlamydomonas)                   | ENST00000493019 |  | -0,560761613 |
| A_23_P41487   | NM_015130       | TBC1D9       | TBC1 domain family, member 9 (with GRAM domain)               | ENST00000442267 |  | -0,560872858 |

|               |                 |                |                                                              |                 |              |
|---------------|-----------------|----------------|--------------------------------------------------------------|-----------------|--------------|
| A_23_P71530   | NM_002546       | TNFRSF11B      | tumor necrosis factor receptor superfamily, member 11b       | ENST00000521597 | -0,560959325 |
| A_21_P0002255 | TCONS_00003759  | XLOC_001560    |                                                              |                 | -0,561435258 |
| A_23_P122508  | NM_080870       | DPCR1          | diffuse panbronchiolitis critical region 1                   | ENST00000414703 | -0,561635527 |
| A_21_P0006579 | BC015977        | XLOC_008151    |                                                              |                 | -0,561651698 |
| A_21_P0000629 | NR_034072       | SARS           | seryl-tRNA synthetase                                        |                 | -0,561762728 |
| A_23_P398566  | NM_173200       | NR4A3          | nuclear receptor subfamily 4, group A, member 3              | ENST00000330847 | -0,561941498 |
| A_23_P120822  | NM_016327       | UPB1           | ureidopropionase, beta                                       | ENST00000326010 | -0,561967485 |
| A_23_P96158   | NM_000422       | KRT17          | keratin 17                                                   | ENST00000493253 | -0,562041888 |
| A_23_P407096  | NM_152625       | ZNF366         | zinc finger protein 366                                      | ENST00000318442 | -0,562168213 |
| A_21_P0009908 | ENST00000431460 | XLOC_013787    |                                                              | ENST00000431460 | -0,562292764 |
| A_33_P3215113 | NM_012317       | LDOC1          | leucine zipper, down-regulated in cancer 1                   | ENST00000370526 | -0,562360491 |
| A_33_P3286958 | NM_003783       | B3GALT2        | UDP-Gal:betaGlcNAc beta 1,3-galactosyltransferase, polype    | ENST00000367434 | -0,562395262 |
| A_21_P0011035 | ENST00000537616 | XLOC_l2_002886 |                                                              | ENST00000537616 | -0,562833131 |
| A_23_P338479  | NM_014143       | CD274          | CD274 molecule                                               | ENST00000381577 | -0,563012319 |
| A_21_P0000454 | NR_003360       | SNORD116-29    | small nucleolar RNA, C/D box 116-29                          |                 | -0,563227637 |
| A_23_P206901  | NM_017668       | NDE1           | nudE nuclear distribution gene E homolog 1 (A. nidulans)     | ENST00000396355 | -0,563228953 |
| A_21_P0007324 | ENST00000529781 | XLOC_009385    |                                                              | ENST00000529781 | -0,563301234 |
| A_23_P415401  | NM_001206       | KLF9           | Kruppel-like factor 9                                        | ENST00000377126 | -0,563378339 |
| A_21_P0013023 | AK125083        | RAB44          | RAB44, member RAS oncogene family                            |                 | -0,563607877 |
| A_24_P941167  | NM_030641       | APOL6          | apolipoprotein L, 6                                          | ENST00000409652 | -0,563897505 |
| A_23_P120467  | NM_199427       | ZFP64          | zinc finger protein 64 homolog (mouse)                       | ENST00000361387 | -0,564418203 |
| A_24_P82106   | NM_004995       | MMP14          | matrix metalloproteinase 14 (membrane-inserted)              | ENST00000311852 | -0,564485162 |
| A_32_P71571   | NM_182522       | FAM19A4        | family with sequence similarity 19 (chemokine (C-C motif)-li | ENST00000295569 | -0,56473151  |
| A_23_P212655  | NM_130446       | KLHL6          | kelch-like 6 (Drosophila)                                    | ENST00000468734 | -0,564736033 |
| A_32_P18440   | NM_032199       | ARID5B         | AT rich interactive domain 5B (MRF1-like)                    | ENST00000279873 | -0,564960682 |
| A_23_P73837   | NM_138636       | TLR8           | toll-like receptor 8                                         | ENST00000218032 | -0,565090291 |
| A_23_P59616   | NM_173537       | GTF2IRD2       | GTF2I repeat domain containing 2                             | ENST00000412484 | -0,565194975 |
| A_24_P941759  | NM_017769       | G2E3           | G2/M-phase specific E3 ubiquitin protein ligase              | ENST00000206595 | -0,565718071 |
| A_33_P3318117 | NM_000765       | CYP3A7         | cytochrome P450, family 3, subfamily A, polypeptide 7        | ENST00000292414 | -0,565744943 |

|               |                  |                |                                                                                                     |                 |  |              |
|---------------|------------------|----------------|-----------------------------------------------------------------------------------------------------|-----------------|--|--------------|
| A_21_P0012423 | TCONS_I2_0001907 | XLOC_I2_010056 |                                                                                                     |                 |  | -0,565789525 |
| A_33_P3232692 | NM_001185156     | IL24           | interleukin 24                                                                                      | ENST00000294984 |  | -0,566236454 |
| A_23_P122077  | NM_016591        | GCNT4          | glucosaminyl (N-acetyl) transferase 4, core 2                                                       | ENST00000322348 |  | -0,566383194 |
| A_33_P3362296 | ENST00000396017  | KCNGB1         | potassium voltage-gated channel, subfamily G, member 1                                              | ENST00000396017 |  | -0,566802075 |
| A_33_P3362321 | NM_201555        | FHL2           | four and a half LIM domains 2                                                                       | ENST00000452732 |  | -0,567128981 |
| A_24_P398691  | NM_032859        | ABHD13         | abhydrolase domain containing 13                                                                    | ENST00000375898 |  | -0,567259762 |
| A_23_P21976   | NM_001897        | CSPG4          | chondroitin sulfate proteoglycan 4                                                                  | ENST00000308508 |  | -0,567319076 |
| A_24_P167642  | NM_000161        | GCH1           | GTP cyclohydrolase 1                                                                                | ENST00000254299 |  | -0,567373228 |
| A_33_P3404489 | NM_001177465     | MAMLD1         | mastermind-like domain containing 1                                                                 | ENST00000358892 |  | -0,567457376 |
| A_33_P3618561 | BC034282         | LOC730961      | uncharacterized LOC730961                                                                           |                 |  | -0,567514789 |
| A_33_P3305758 | NM_001747        | CAPG           | capping protein (actin filament), gelsolin-like                                                     | ENST00000415012 |  | -0,568261795 |
| A_21_P0007742 | TCONS_00020884   | XLOC_010161    |                                                                                                     |                 |  | -0,568538904 |
| A_23_P122077  | NM_016591        | GCNT4          | glucosaminyl (N-acetyl) transferase 4, core 2                                                       | ENST00000322348 |  | -0,568602232 |
| A_33_P3367201 | NM_052845        | MMAB           | methylmalonic aciduria (cobalamin deficiency) cblB type                                             |                 |  | -0,568633214 |
| A_24_P122921  | NM_138621        | BCL2L11        | BCL2-like 11 (apoptosis facilitator)                                                                |                 |  | -0,569111174 |
| A_23_P329870  | NM_024599        | RHBDF2         | rhomoid 5 homolog 2 (Drosophila)                                                                    | ENST00000313080 |  | -0,569155931 |
| A_21_P0010697 | NR_023918        | LINC00339      | long intergenic non-protein coding RNA 339                                                          |                 |  | -0,569270909 |
| A_23_P77590   | NM_018052        | VAC14          | Vac14 homolog (S. cerevisiae)                                                                       | ENST00000536184 |  | -0,569454099 |
| A_23_P110624  | NM_001332        | CTNND2         | catenin (cadherin-associated protein), delta 2 (neural plakoblastophilin family, class II member 2) | ENST00000538638 |  | -0,569939775 |
| A_21_P0002852 | ENST00000421735  | XLOC_003123    |                                                                                                     | ENST00000421735 |  | -0,570020469 |
| A_33_P3356863 | AK128846         | LOC100128172   | uncharacterized LOC100128172                                                                        |                 |  | -0,570203473 |
| A_33_P3251796 | NM_014317        | PDSS1          | prenyl (decaprenyl) diphosphate synthase, subunit 1                                                 | ENST00000396343 |  | -0,570330932 |
| A_33_P3290562 | NM_000168        | GLI3           | GLI family zinc finger 3                                                                            | ENST00000395925 |  | -0,571089674 |
| A_23_P403335  | NM_015065        | EXPH5          | exophilin 5                                                                                         | ENST00000525344 |  | -0,571687686 |
| A_33_P3222183 | NM_020134        | DPYSL5         | dihydropyrimidinase-like 5                                                                          | ENST00000401478 |  | -0,571759965 |
| A_21_P0013864 | AK056524         | XLOC_I2_015710 |                                                                                                     |                 |  | -0,571967563 |
| A_24_P941268  | NM_007220        | CA5B           | carbonic anhydrase VB, mitochondrial                                                                | ENST00000318636 |  | -0,572431242 |
| A_23_P116512  | NM_024841        | PRR5L          | proline rich 5 like                                                                                 | ENST00000389693 |  | -0,572720344 |
| A_23_P210886  | NM_138578        | BCL2L1         | BCL2-like 1                                                                                         | ENST00000420653 |  | -0,572893308 |



|               |                  |                |                                                              |                 |  |              |
|---------------|------------------|----------------|--------------------------------------------------------------|-----------------|--|--------------|
| A_21_P0013475 | TCONS_I2_0002773 | XLOC_I2_014191 |                                                              |                 |  | -0,572906092 |
| A_24_P169013  | NR_001298        | HLA-DRB6       | major histocompatibility complex, class II, DR beta 6 (pseud | ENST00000437183 |  | -0,573186012 |
| A_33_P3307960 | NM_001103170     | AADACL3        | arylacetamide deacetylase-like 3                             | ENST00000359318 |  | -0,573267089 |
| A_21_P0001514 | THC2695938       | XLOC_000852    |                                                              |                 |  | -0,573438209 |
| A_32_P133840  | NM_014858        | TMCC2          | transmembrane and coiled-coil domain family 2                | ENST00000358024 |  | -0,573563525 |
| A_23_P217845  | NM_002928        | RGS16          | regulator of G-protein signaling 16                          | ENST00000367558 |  | -0,573597286 |
| A_33_P3416286 | NM_006047        | RBM12          | RNA binding motif protein 12                                 | ENST00000359646 |  | -0,573804148 |
| A_24_P712562  | NM_001085430     | C17orf67       | chromosome 17 open reading frame 67                          | ENST00000397862 |  | -0,573923976 |
| A_23_P117782  | NM_018357        | LARP6          | La ribonucleoprotein domain family, member 6                 | ENST00000299213 |  | -0,574140865 |
| A_23_P77593   | NM_018052        | VAC14          | Vac14 homolog ( <i>S. cerevisiae</i> )                       | ENST00000536184 |  | -0,574315513 |
| A_23_P165624  | NM_007115        | TNFAIP6        | tumor necrosis factor, alpha-induced protein 6               | ENST00000460812 |  | -0,574393688 |
| A_23_P127584  | NM_006169        | NNMT           | nicotinamide N-methyltransferase                             | ENST00000299964 |  | -0,574703094 |
| A_23_P25155   | NM_020370        | GPR84          | G protein-coupled receptor 84                                | ENST00000551809 |  | -0,574723583 |
| A_23_P6535    | NM_138433        | KLHDC7B        | kelch domain containing 7B                                   | ENST00000395676 |  | -0,57497075  |
| A_33_P3387856 | NM_001100625     | CENPN          | centromere protein N                                         | ENST00000393335 |  | -0,574975447 |
| A_21_P0009342 | NR_030732        | LOC645638      | WDNM1-like pseudogene                                        |                 |  | -0,575241945 |
| A_24_P943106  | NM_001080415     | U2SURP         | U2 snRNP-associated SURP domain containing                   | ENST00000473835 |  | -0,575253501 |
| A_33_P3283964 | NR_033740        | CES1P2         | carboxylesterase 1 pseudogene 2                              |                 |  | -0,575484998 |
| A_23_P120822  | NM_016327        | UPB1           | ureidopropionase, beta                                       | ENST00000326010 |  | -0,575556553 |
| A_23_P76983   | NM_025057        | C14orf45       | chromosome 14 open reading frame 45                          | ENST00000394009 |  | -0,575782271 |
| A_23_P102017  | NM_020711        | ERMN           | ermin, ERM-like protein                                      | ENST00000397283 |  | -0,575827919 |
| A_24_P171268  | NM_182663        | RASSF5         | Ras association (RalGDS/AF-6) domain family member 5         | ENST00000304534 |  | -0,575937184 |
| A_23_P119886  | NM_001486        | GCKR           | glucokinase (hexokinase 4) regulator                         | ENST00000264717 |  | -0,576028984 |
| A_23_P121480  | NM_001004196     | CD200          | CD200 molecule                                               | ENST00000478595 |  | -0,576400129 |
| A_23_P121064  | NM_002852        | PTX3           | pentraxin 3, long                                            | ENST00000295927 |  | -0,576421368 |
| A_23_P412321  | NM_000579        | CCR5           | chemokine (C-C motif) receptor 5                             | ENST00000343801 |  | -0,576483616 |
| A_24_P920646  | BC035714         | CYP19A1        | cytochrome P450, family 19, subfamily A, polypeptide 1       | ENST00000405913 |  | -0,576497343 |
| A_24_P237443  | NM_018990        | SASH3          | SAM and SH3 domain containing 3                              | ENST00000356892 |  | -0,577139478 |
| A_24_P124624  | NM_002543        | OLR1           | oxidized low density lipoprotein (lectin-like) receptor 1    | ENST00000309539 |  | -0,577219211 |

|               |                 |                |                                                          |                 |              |
|---------------|-----------------|----------------|----------------------------------------------------------|-----------------|--------------|
| A_33_P3329326 | ENST00000374025 | CD164L2        | CD164 sialomucin-like 2                                  | ENST00000374025 | -0,577702433 |
| A_33_P3729375 | AK093857        | LOC285181      | uncharacterized LOC285181                                |                 | -0,577707632 |
| A_21_P0012891 | NR_039984       | LOC729506      | uncharacterized LOC729506                                |                 | -0,578845443 |
| A_24_P161018  | NM_017554       | PARP14         | poly (ADP-ribose) polymerase family, member 14           | ENST00000310290 | -0,579099184 |
| A_23_P117782  | NM_018357       | LARP6          | La ribonucleoprotein domain family, member 6             | ENST00000299213 | -0,579322553 |
| A_24_P176493  | NM_015251       | ATMIN          | ATM interactor                                           | ENST00000299575 | -0,579373131 |
| A_33_P3341841 | NM_001004312    | RTP2           | receptor (chemosensory) transporter protein 2            | ENST00000358241 | -0,579412303 |
| A_21_P0012015 | NR_038386       | LOC728537      | uncharacterized LOC728537                                | ENST00000445382 | -0,579458366 |
| A_23_P138725  | NM_031484       | MARVELD1       | MARVEL domain containing 1                               | ENST00000285605 | -0,579632788 |
| A_24_P743869  | NM_001195304    | BBIP1          | BBSome interacting protein 1                             | ENST00000448814 | -0,579721215 |
| A_23_P210482  | NM_000022       | ADA            | adenosine deaminase                                      | ENST00000464097 | -0,579827741 |
| A_24_P208567  | NM_003855       | IL18R1         | interleukin 18 receptor 1                                | ENST00000409599 | -0,580015283 |
| A_21_P0004246 | TCONS_00009943  | XLOC_004366    |                                                          |                 | -0,580077796 |
| A_33_P3216694 | NM_024503       | HIVEP3         | human immunodeficiency virus type I enhancer binding pro | ENST00000247584 | -0,580745906 |
| A_23_P31896   | NM_003033       | ST3GAL1        | ST3 beta-galactoside alpha-2,3-sialyltransferase 1       | ENST00000522652 | -0,580836287 |
| A_23_P500400  | NM_080284       | ABCA6          | ATP-binding cassette, sub-family A (ABC1), member 6      | ENST00000284425 | -0,580945631 |
| A_21_P0001763 | XR_110856       | LOC100506929   | uncharacterized LOC100506929                             |                 | -0,58103327  |
| A_21_P0012827 | ENST00000503577 | XLOC_I2_011531 |                                                          | ENST00000503577 | -0,581126107 |
| A_33_P3326807 | AK127768        | LOC100130152   | uncharacterized LOC100130152                             |                 | -0,581157108 |
| A_33_P3210583 | NM_014911       | AAK1           | AP2 associated kinase 1                                  | ENST00000409085 | -0,581323034 |
| A_33_P3809497 | NR_033987       | FLJ37505       | uncharacterized LOC400087                                |                 | -0,581428013 |
| A_23_P120822  | NM_016327       | UPB1           | ureidopropionase, beta                                   | ENST00000326010 | -0,581463124 |
| A_23_P216655  | NM_014788       | TRIM14         | tripartite motif containing 14                           | ENST00000341469 | -0,581523319 |
| A_21_P0006182 | TCONS_00016075  | XLOC_007464    |                                                          |                 | -0,581578045 |
| A_23_P23074   | NM_006417       | IFI44          | interferon-induced protein 44                            | ENST00000485662 | -0,582081812 |
| A_21_P0012147 | NR_038337       | LOC100505783   | uncharacterized LOC100505783                             |                 | -0,582154623 |
| A_23_P82651   | NM_002523       | NPTX2          | neuronal pentraxin II                                    | ENST00000265634 | -0,582312466 |
| A_33_P3229467 | NM_004760       | STK17A         | serine/threonine kinase 17a                              |                 | -0,582416039 |
| A_21_P0013873 | ENST00000427671 | XLOC_I2_015842 |                                                          | ENST00000427671 | -0,58361552  |

|               |                 |              |                                                          |                 |              |
|---------------|-----------------|--------------|----------------------------------------------------------|-----------------|--------------|
| A_33_P3279431 | NM_001007024    | GOSR1        | golgi SNAP receptor complex member 1                     | ENST00000414833 | -0,583621481 |
| A_21_P0011933 | NR_037597       | LOC442028    | uncharacterized LOC442028                                |                 | -0,583754636 |
| A_23_P121064  | NM_002852       | PTX3         | pentraxin 3, long                                        | ENST00000295927 | -0,584050032 |
| A_24_P941831  | NM_001044385    | TMEM237      | transmembrane protein 237                                | ENST00000495329 | -0,584173694 |
| A_33_P3342081 | NM_001198       | PRDM1        | PR domain containing 1, with ZNF domain                  | ENST00000369096 | -0,584224238 |
| A_24_P37409   | NM_004418       | DUSP2        | dual specificity phosphatase 2                           | ENST00000488952 | -0,584271023 |
| A_23_P150018  | NM_004419       | DUSP5        | dual specificity phosphatase 5                           | ENST00000369583 | -0,584378034 |
| A_23_P412321  | NM_000579       | CCR5         | chemokine (C-C motif) receptor 5                         | ENST00000343801 | -0,584752127 |
| A_33_P3352877 | NM_015087       | SPG20        | spastic paraplegia 20 (Troyer syndrome)                  | ENST00000423217 | -0,584872617 |
| A_21_P0007668 | TCONS_00020652  | XLOC_009952  |                                                          |                 | -0,585196099 |
| A_23_P388190  | NM_033081       | DIDO1        | death inducer-obliterator 1                              | ENST00000461792 | -0,585499275 |
| A_23_P116653  | NM_138722       | BCL2L14      | BCL2-like 14 (apoptosis facilitator)                     | ENST00000396369 | -0,585995976 |
| A_33_P3397603 | AK094114        | LOC100130278 | uncharacterized LOC100130278                             |                 | -0,586055795 |
| A_33_P3728698 | AK127183        | FLJ45248     | FLJ45248 protein                                         |                 | -0,586075883 |
| A_33_P3260034 | ENST00000372297 | AIF1L        | allograft inflammatory factor 1-like                     | ENST00000372297 | -0,586317066 |
| A_23_P164773  | NM_002002       | FCER2        | Fc fragment of IgE, low affinity II, receptor for (CD23) | ENST00000346664 | -0,586332326 |
| A_23_P412321  | NM_000579       | CCR5         | chemokine (C-C motif) receptor 5                         | ENST00000343801 | -0,58682027  |
| A_33_P3234124 | ENST00000481917 | FAM132B      | family with sequence similarity 132, member B            | ENST00000481917 | -0,586890003 |
| A_23_P200096  | NM_025106       | SPSB1        | splA/ryanodine receptor domain and SOCS box containing 1 | ENST00000377399 | -0,586946218 |
| A_23_P25030   | NM_003725       | HSD17B6      | hydroxysteroid (17-beta) dehydrogenase 6 homolog (mouse) | ENST00000554150 | -0,587115549 |
| A_21_P0004773 | NR_038863       | LOC285758    | uncharacterized LOC285758                                |                 | -0,587764643 |
| A_24_P151121  | AK056201        | A1BG         | alpha-1-B glycoprotein                                   |                 | -0,58787051  |
| A_24_P118196  | NM_001080393    | GXYLT2       | glucoside xylosyltransferase 2                           | ENST00000389617 | -0,587935646 |
| A_33_P3384045 | XR_110862       | NSAP11       | nervous system abundant protein 11                       |                 | -0,587942193 |
| A_23_P117782  | NM_018357       | LARP6        | La ribonucleoprotein domain family, member 6             | ENST00000299213 | -0,58798643  |
| A_23_P412321  | NM_000579       | CCR5         | chemokine (C-C motif) receptor 5                         | ENST00000343801 | -0,588103419 |
| A_33_P3382324 | NM_012217       | TPSD1        | tryptase delta 1                                         | ENST00000211076 | -0,588144022 |
| A_23_P87879   | NM_001781       | CD69         | CD69 molecule                                            | ENST00000228434 | -0,588148265 |
| A_33_P3224946 | XR_108603       | FLJ46010     | FLJ46010 protein                                         |                 | -0,588293515 |

|                |              |                |                                                                        |                 |              |
|----------------|--------------|----------------|------------------------------------------------------------------------|-----------------|--------------|
| A_24_P588897   | NM_013272    | SLCO3A1        | solute carrier organic anion transporter family, member 3A             | ENST00000318445 | -0,588466899 |
| A_33_P3307163  | NM_001134363 | RBM20          | RNA binding motif protein 20                                           | ENST00000369519 | -0,588690983 |
| A_33_P3310104  | NM_002639    | SERPINB5       | serpin peptidase inhibitor, clade B (ovalbumin), member 5              | ENST00000382771 | -0,588823991 |
| A_23_P90855    | NM_014808    | FARP2          | FERM, RhoGEF and pleckstrin domain protein 2                           | ENST00000470617 | -0,589037931 |
| A_33_P3395605  | NM_181724    | TMEM119        | transmembrane protein 119                                              | ENST00000392806 | -0,589344076 |
| A_21_P0010535  | THC2520127   | XLOC_I2_000297 |                                                                        |                 | -0,589397945 |
| A_19_P00320469 | NR_015375    | FLJ35024       | uncharacterized LOC401491                                              |                 | -0,589587602 |
| A_33_P3248439  | NM_033446    | FAM125B        | family with sequence similarity 125, member B                          | ENST00000361171 | -0,589780106 |
| A_24_P286114   | NM_004172    | SLC1A3         | solute carrier family 1 (glial high affinity glutamate transporter)    | ENST00000381918 | -0,589836966 |
| A_23_P66948    | NM_022751    | FAM59A         | family with sequence similarity 59, member A                           | ENST00000269209 | -0,589848866 |
| A_23_P122077   | NM_016591    | GCNT4          | glucosaminyl (N-acetyl) transferase 4, core 2                          | ENST00000322348 | -0,589940416 |
| A_23_P121064   | NM_002852    | PTX3           | pentraxin 3, long                                                      | ENST00000295927 | -0,590051794 |
| A_33_P3246833  | NM_173843    | IL1RN          | interleukin 1 receptor antagonist                                      | ENST00000259206 | -0,590117921 |
| A_24_P85775    | NM_001039477 | C1orf38        | chromosome 1 open reading frame 38                                     | ENST00000373927 | -0,5901918   |
| A_33_P3334923  | NR_028138    | LOC338758      | uncharacterized LOC338758                                              |                 | -0,590217785 |
| A_32_P26376    | NM_152305    | POGLUT1        | protein O-glucosyltransferase 1                                        | ENST00000295588 | -0,590295532 |
| A_23_P348767   | NM_213631    | C20orf132      | chromosome 20 open reading frame 132                                   | ENST00000400440 | -0,590367546 |
| A_33_P3360072  | NM_001161429 | RANBP3L        | RAN binding protein 3-like                                             | ENST00000296604 | -0,59058139  |
| A_33_P3281785  | NM_006167    | NKX3-1         | NK3 homeobox 1                                                         | ENST00000300332 | -0,59062171  |
| A_23_P354288   | NM_153606    | FAM71A         | family with sequence similarity 71, member A                           | ENST00000545975 | -0,590664901 |
| A_23_P34597    | NM_001785    | CDA            | cytidine deaminase                                                     | ENST00000461985 | -0,590728056 |
| A_23_P121064   | NM_002852    | PTX3           | pentraxin 3, long                                                      | ENST00000295927 | -0,590758369 |
| A_21_P0011409  | AK125393     | LOC100505648   | uncharacterized LOC100505648                                           |                 | -0,591376495 |
| A_21_P0000194  | NM_014863    | CHST15         | carbohydrate (N-acetylgalactosamine 4-sulfate 6-O) sulfotransferase 15 |                 | -0,591463436 |
| A_23_P121064   | NM_002852    | PTX3           | pentraxin 3, long                                                      | ENST00000295927 | -0,591646262 |
| A_23_P329261   | NM_000891    | KCNJ2          | potassium inwardly-rectifying channel, subfamily J, member 2           | ENST00000243457 | -0,592510369 |
| A_33_P3358342  | NM_005067    | SIAH2          | seven in absentia homolog 2 (Drosophila)                               | ENST00000312960 | -0,592557876 |
| A_23_P104318   | NM_019058    | DDIT4          | DNA-damage-inducible transcript 4                                      | ENST00000307365 | -0,592777724 |
| A_23_P103803   | NM_052939    | FCRL3          | Fc receptor-like 3                                                     | ENST00000368186 | -0,592788503 |

|                |                 |                |                                                           |                 |              |
|----------------|-----------------|----------------|-----------------------------------------------------------|-----------------|--------------|
| A_23_P365738   | NM_015193       | ARC            | activity-regulated cytoskeleton-associated protein        | ENST00000356613 | -0,593102321 |
| A_23_P412321   | NM_000579       | CCR5           | chemokine (C-C motif) receptor 5                          | ENST00000343801 | -0,593158696 |
| A_23_P412321   | NM_000579       | CCR5           | chemokine (C-C motif) receptor 5                          | ENST00000343801 | -0,593292118 |
| A_23_P117782   | NM_018357       | LARP6          | La ribonucleoprotein domain family, member 6              | ENST00000299213 | -0,593481172 |
| A_21_P0006988  | TCONS_00018492  | XLOC_008792    |                                                           |                 | -0,593509732 |
| A_23_P104318   | NM_019058       | DDIT4          | DNA-damage-inducible transcript 4                         | ENST00000307365 | -0,593553749 |
| A_21_P0009753  | THC2527567      | XLOC_013282    |                                                           |                 | -0,593676512 |
| A_21_P0005592  | ENST00000480919 | XLOC_006326    |                                                           | ENST00000480919 | -0,594030146 |
| A_33_P3375934  | NM_005746       | NAMPT          | nicotinamide phosphoribosyltransferase                    | ENST00000222553 | -0,59436221  |
| A_21_P0000901  | NR_040100       | ENTPD3-AS1     | ENTPD3 antisense RNA 1 (non-protein coding)               |                 | -0,594538593 |
| A_21_P0012033  | ENST00000416361 | XLOC_I2_007644 |                                                           | ENST00000416361 | -0,59456642  |
| A_21_P0001776  | BC036617        | XLOC_001558    |                                                           |                 | -0,594589009 |
| A_21_P0010364  | ENST00000428765 | XLOC_014257    |                                                           | ENST00000428765 | -0,59470713  |
| A_24_P105391   | NM_001017922    | ERMAP          | erythroblast membrane-associated protein (Scianna blood § | ENST00000372517 | -0,594936703 |
| A_23_P352266   | NM_000633       | BCL2           | B-cell CLL/lymphoma 2                                     | ENST00000398117 | -0,595405724 |
| A_19_P00315651 | XR_132670       | LOC100652730   | uncharacterized LOC100652730                              | ENST00000412500 | -0,595478198 |
| A_32_P128391   | NR_038842       | LOC728431      | uncharacterized LOC728431                                 | ENST00000424989 | -0,595779001 |
| A_33_P3403942  | NM_080721       | C20orf123      | chromosome 20 open reading frame 123                      | ENST00000279028 | -0,595951591 |
| A_23_P119102   | NM_003370       | VASP           | vasodilator-stimulated phosphoprotein                     | ENST00000245932 | -0,595995805 |
| A_19_P00319578 | THC2524841      | XLOC_I2_010723 |                                                           |                 | -0,596573171 |
| A_19_P00317277 | AK055877        | LOC100506328   | uncharacterized LOC100506328                              |                 | -0,59664808  |
| A_33_P3394853  | NR_027069       | LOC100132215   | uncharacterized LOC100132215                              | ENST00000413549 | -0,596938201 |
| A_23_P74278    | NM_001037341    | PDE4B          | phosphodiesterase 4B, cAMP-specific                       | ENST00000329654 | -0,596998371 |
| A_23_P134454   | NM_001753       | CAV1           | caveolin 1, caveolae protein, 22kDa                       | ENST00000341049 | -0,597203179 |
| A_23_P121064   | NM_002852       | PTX3           | pentraxin 3, long                                         | ENST00000295927 | -0,597278794 |
| A_23_P302672   | BC013592        | DDIT4L         | DNA-damage-inducible transcript 4-like                    |                 | -0,597411428 |
| A_23_P352266   | NM_000633       | BCL2           | B-cell CLL/lymphoma 2                                     | ENST00000398117 | -0,597687978 |
| A_33_P3219591  | NM_020954       | RNF213         | ring finger protein 213                                   | ENST00000319921 | -0,597957243 |
| A_23_P360754   | NM_005099       | ADAMTS4        | ADAM metallopeptidase with thrombospondin type 1 motif    | ENST00000367996 | -0,598008667 |



|                |                  |                |                                                     |                 |              |
|----------------|------------------|----------------|-----------------------------------------------------|-----------------|--------------|
| A_23_P387184   | NM_020464        | NHSL1          | NHS-like 1                                          | ENST00000343505 | -0,598402376 |
| A_23_P58082    | NM_199511        | CCDC80         | coiled-coil domain containing 80                    | ENST00000444594 | -0,598486176 |
| A_23_P211572   | NM_145733        | Sep-03         | septin 3                                            | ENST00000291236 | -0,598528246 |
| A_32_P181297   | NR_002330        | ST7-AS1        | ST7 antisense RNA 1 (non-protein coding)            | ENST00000456775 | -0,59866279  |
| A_23_P120822   | NM_016327        | UPB1           | ureidopropionase, beta                              | ENST00000326010 | -0,598781558 |
| A_32_P221822   | NM_016052        | RRP15          | ribosomal RNA processing 15 homolog (S. cerevisiae) | ENST00000366932 | -0,598995926 |
| A_23_P214080   | NM_001964        | EGR1           | early growth response 1                             | ENST00000239938 | -0,599204119 |
| A_23_P111888   | NM_138455        | CTHRC1         | collagen triple helix repeat containing 1           | ENST00000297577 | -0,599431612 |
| A_23_P204269   | NM_006313        | USP15          | ubiquitin specific peptidase 15                     | ENST00000393654 | -0,599684196 |
| A_21_P0005642  | TCONS_00014573   | XLOC_006684    |                                                     |                 | -0,600183152 |
| A_24_P65121    | NM_001040655     | TTC23          | tetratricopeptide repeat domain 23                  | ENST00000394130 | -0,600260858 |
| A_21_P0013652  | TCONS_I2_0002934 | XLOC_I2_015213 |                                                     |                 | -0,600438281 |
| A_23_P41470    | NM_017631        | DDX60          | DEAD (Asp-Glu-Ala-Asp) box polypeptide 60           | ENST00000393743 | -0,600587564 |
| A_33_P3286774  | ENST00000479369  | PDE4DIP        | phosphodiesterase 4D interacting protein            | ENST00000479369 | -0,600643125 |
| A_19_P00805272 | NM_001145206     | KIAA1671       |                                                     | ENST00000358431 | -0,600990336 |
| A_23_P430792   | NM_152781        | C17orf66       | chromosome 17 open reading frame 66                 | ENST00000462028 | -0,601312177 |
| A_33_P3257594  | NM_213607        | CCDC103        | coiled-coil domain containing 103                   | ENST00000357776 | -0,601377305 |
| A_23_P435477   | NM_001077263     | TMPRSS13       | transmembrane protease, serine 13                   | ENST00000336500 | -0,601394963 |
| A_24_P131066   | NM_004258        | CD101          | CD101 molecule                                      | ENST00000369470 | -0,601417945 |
| A_21_P0008672  | TCONS_00023504   | XLOC_011348    |                                                     |                 | -0,601550908 |
| A_23_P64828    | NM_002534        | OAS1           | 2'-5'-oligoadenylate synthetase 1, 40/46kDa         | ENST00000377508 | -0,601725987 |
| A_33_P3381235  | NR_024470        | LOC100127888   | uncharacterized LOC100127888                        | ENST00000411824 | -0,602164516 |
| A_23_P104438   | NM_032578        | MYPN           | myopalladin                                         | ENST00000354393 | -0,602269891 |
| A_23_P129717   | NM_080663        | ERI2           | ERI1 exoribonuclease family member 2                | ENST00000300005 | -0,602325574 |
| A_23_P212423   | NM_005108        | XYLB           | xylulokinase homolog (H. influenzae)                | ENST00000207870 | -0,602437789 |
| A_23_P412321   | NM_000579        | CCR5           | chemokine (C-C motif) receptor 5                    | ENST00000343801 | -0,603218164 |
| A_23_P106973   | NM_006640        | Sep-09         | septin 9                                            | ENST00000329047 | -0,603320291 |
| A_24_P96403    | NM_001001890     | RUNX1          | runt-related transcription factor 1                 | ENST00000344691 | -0,603415478 |
| A_23_P412321   | NM_000579        | CCR5           | chemokine (C-C motif) receptor 5                    | ENST00000343801 | -0,603605228 |

|                |                 |                |                                                                     |                 |              |
|----------------|-----------------|----------------|---------------------------------------------------------------------|-----------------|--------------|
| A_23_P121064   | NM_002852       | PTX3           | pentraxin 3, long                                                   | ENST00000295927 | -0,60364828  |
| A_24_P49199    | NM_181789       | GLDN           | gliomedin                                                           | ENST00000396399 | -0,604205852 |
| A_23_P134663   | NM_024812       | BAALC          | brain and acute leukemia, cytoplasmic                               | ENST00000309982 | -0,604208116 |
| A_23_P121064   | NM_002852       | PTX3           | pentraxin 3, long                                                   | ENST00000295927 | -0,604287209 |
| A_33_P3212232  | NM_001039396    | MPEG1          | macrophage expressed 1                                              | ENST00000361050 | -0,604762033 |
| A_23_P121064   | NM_002852       | PTX3           | pentraxin 3, long                                                   | ENST00000295927 | -0,604822305 |
| A_33_P3286536  | NM_002033       | FUT4           | fucosyltransferase 4 (alpha (1,3) fucosyltransferase, myeloid)      | ENST00000358752 | -0,604889603 |
| A_33_P3376264  | ENST00000378938 | GK             | glycerol kinase                                                     | ENST00000378938 | -0,604983495 |
| A_33_P3358397  | NM_018176       | LGI2           | leucine-rich repeat LGI family, member 2                            | ENST00000382114 | -0,60552935  |
| A_23_P121064   | NM_002852       | PTX3           | pentraxin 3, long                                                   | ENST00000295927 | -0,605549742 |
| A_24_P82466    | NM_201433       | GAS7           | growth arrest-specific 7                                            | ENST00000323816 | -0,605837959 |
| A_24_P350759   | NM_004171       | SLC1A2         | solute carrier family 1 (glial high affinity glutamate transporter) | ENST00000278379 | -0,605883135 |
| A_23_P117782   | NM_018357       | LARP6          | La ribonucleoprotein domain family, member 6                        | ENST00000299213 | -0,606098496 |
| A_23_P401547   | NM_015480       | PVRL3          | poliovirus receptor-related 3                                       | ENST00000319792 | -0,606181374 |
| A_23_P300245   | NM_001040283    | DMRTC2         | DMRT-like family C2                                                 | ENST00000269945 | -0,606485618 |
| A_23_P32847    | NM_001510       | GRID2          | glutamate receptor, ionotropic, delta 2                             | ENST00000282020 | -0,606596686 |
| A_23_P119102   | NM_003370       | VASP           | vasodilator-stimulated phosphoprotein                               | ENST00000245932 | -0,606613529 |
| A_21_P0014427  | ENST00000441316 | LOC100506544   |                                                                     | ENST00000441316 | -0,606800049 |
| A_24_P172481   | NM_006074       | TRIM22         | tripartite motif containing 22                                      | ENST00000455293 | -0,606867637 |
| A_33_P3417313  | NM_023078       | PYCRL          | pyrroline-5-carboxylate reductase-like                              | ENST00000377579 | -0,607258548 |
| A_33_P3302191  | NM_013266       | CTNNA3         | catenin (cadherin-associated protein), alpha 3                      | ENST00000373735 | -0,607283669 |
| A_21_P0010522  | ENST00000451482 | XLOC_I2_000116 |                                                                     | ENST00000451482 | -0,607342865 |
| A_23_P200829   | NM_015326       | SRGAP2         | SLIT-ROBO Rho GTPase activating protein 2                           | ENST00000295713 | -0,60766759  |
| A_33_P3222917  | NM_001024736    | CD276          | CD276 molecule                                                      | ENST00000318443 | -0,607759619 |
| A_24_P207139   | NM_033238       | PML            | promyelocytic leukemia                                              | ENST00000268058 | -0,60779212  |
| A_24_P215765   | NM_024490       | ATP10A         | ATPase, class V, type 10A                                           | ENST00000555815 | -0,60797474  |
| A_19_P00317053 | TCONS_00012259  | XLOC_005810    |                                                                     |                 | -0,608545729 |
| A_24_P102821   | NM_000952       | PTAFR          | platelet-activating factor receptor                                 | ENST00000305392 | -0,608719027 |
| A_21_P0007359  | TCONS_00019652  | XLOC_009457    |                                                                     |                 | -0,608752729 |

|                |                  |                |                                                                                    |  |                 |              |
|----------------|------------------|----------------|------------------------------------------------------------------------------------|--|-----------------|--------------|
| A_21_P0010439  | TCONS_00029694   | XLOC_014366    |                                                                                    |  |                 | -0,609545682 |
| A_24_P128308   | ENST00000469435  | KLF6           | Kruppel-like factor 6                                                              |  | ENST00000469435 | -0,60967009  |
| A_23_P412321   | NM_000579        | CCR5           | chemokine (C-C motif) receptor 5                                                   |  | ENST00000343801 | -0,609726042 |
| A_23_P119102   | NM_003370        | VASP           | vasodilator-stimulated phosphoprotein                                              |  | ENST00000245932 | -0,609781896 |
| A_21_P0013514  | TCONS_I2_0002818 | XLOC_I2_014504 |                                                                                    |  |                 | -0,609835037 |
| A_33_P3329769  | NM_152731        | BEND6          | BEN domain containing 6                                                            |  | ENST00000322055 | -0,609849284 |
| A_33_P3335840  | NM_001006623     | WDR33          | WD repeat domain 33                                                                |  | ENST00000393006 | -0,61042368  |
| A_23_P218770   | NM_002872        | RAC2           | ras-related C3 botulinum toxin substrate 2 (rho family, small GTP-binding protein) |  | ENST00000249071 | -0,610430989 |
| A_19_P00317412 | NR_038842        | LOC728431      | uncharacterized LOC728431                                                          |  | ENST00000424989 | -0,61073926  |
| A_23_P139669   | NM_006931        | SLC2A3         | solute carrier family 2 (facilitated glucose transporter), member 3                |  | ENST00000479059 | -0,610879838 |
| A_33_P3220470  | NM_005585        | SMAD6          | SMAD family member 6                                                               |  | ENST00000338426 | -0,610958575 |
| A_32_P174572   | NR_002774        | HTR7P1         | 5-hydroxytryptamine (serotonin) receptor 7 pseudogene 1                            |  | ENST00000535469 | -0,611056908 |
| A_23_P50517    | NM_001101419     | ZNF541         | zinc finger protein 541                                                            |  | ENST00000314121 | -0,611089502 |
| A_23_P119102   | NM_003370        | VASP           | vasodilator-stimulated phosphoprotein                                              |  | ENST00000245932 | -0,611138961 |
| A_23_P104318   | NM_019058        | DDIT4          | DNA-damage-inducible transcript 4                                                  |  | ENST00000307365 | -0,611217906 |
| A_23_P362659   | NM_002468        | MYD88          | myeloid differentiation primary response gene (88)                                 |  | ENST00000484513 | -0,611323109 |
| A_23_P106973   | NM_006640        | Sep-09         | septin 9                                                                           |  | ENST00000329047 | -0,611513876 |
| A_33_P3417150  | NM_002563        | P2RY1          | purinergic receptor P2Y, G-protein coupled, 1                                      |  | ENST00000305097 | -0,611523089 |
| A_23_P120822   | NM_016327        | UPB1           | ureidopropionase, beta                                                             |  | ENST00000326010 | -0,611848097 |
| A_23_P116512   | NM_024841        | PRR5L          | proline rich 5 like                                                                |  | ENST00000389693 | -0,612247297 |
| A_24_P117410   | NM_138433        | KLHDC7B        | kelch domain containing 7B                                                         |  | ENST00000395676 | -0,612251781 |
| A_21_P0002540  | ENST00000440900  | XLOC_002485    |                                                                                    |  | ENST00000440900 | -0,612304874 |
| A_23_P71774    | NM_002176        | IFNB1          | interferon, beta 1, fibroblast                                                     |  | ENST00000380232 | -0,612689986 |
| A_23_P887      | NM_014002        | IKBKE          | inhibitor of kappa light polypeptide gene enhancer in B-cells 1, epsilon           |  | ENST00000537984 | -0,612759246 |
| A_23_P106973   | NM_006640        | Sep-09         | septin 9                                                                           |  | ENST00000329047 | -0,612772398 |
| A_21_P0012729  | THC2524841       | XLOC_I2_010723 |                                                                                    |  |                 | -0,612998876 |
| A_21_P0012945  | BG214557         | XLOC_I2_011627 |                                                                                    |  |                 | -0,613272971 |
| A_23_P61778    | NM_022463        | NXN            | nucleoredoxin                                                                      |  | ENST00000336868 | -0,613625238 |
| A_23_P340848   | NM_000960        | PTGIR          | prostaglandin I2 (prostacyclin) receptor (IP)                                      |  | ENST00000291294 | -0,613839924 |

|                |                 |              |                                                               |                 |              |
|----------------|-----------------|--------------|---------------------------------------------------------------|-----------------|--------------|
| A_23_P157875   | NM_002003       | FCN1         | ficolin (collagen/fibrinogen domain containing) 1             | ENST00000308299 | -0,613883618 |
| A_19_P00321761 | ENST00000412979 | XLOC_002310  |                                                               | ENST00000412979 | -0,614146862 |
| A_33_P3399267  | NM_172200       | IL15RA       | interleukin 15 receptor, alpha                                | ENST00000379972 | -0,614419938 |
| A_23_P44244    | NM_003069       | SMARCA1      | SWI/SNF related, matrix associated, actin dependent regula    | ENST00000371122 | -0,61481006  |
| A_32_P98683    | NM_005937       | MLLT6        | myeloid/lymphoid or mixed-lineage leukemia (trithorax hor     | ENST00000325718 | -0,614815634 |
| A_23_P105545   | NM_016830       | VAMP1        | vesicle-associated membrane protein 1 (synaptobrevin 1)       | ENST00000535927 | -0,614850269 |
| A_33_P3241541  | CR936789        | FSD1L        | fibronectin type III and SPRY domain containing 1-like        | ENST00000374707 | -0,61488955  |
| A_23_P216340   | NM_001045556    | SLA          | Src-like-adaptor                                              | ENST00000338087 | -0,61525305  |
| A_23_P155848   | NM_014421       | DKK2         | dickkopf 2 homolog (Xenopus laevis)                           | ENST00000285311 | -0,615377304 |
| A_21_P0013354  | NR_027789       | ZNF767       | zinc finger family member 767                                 | ENST00000472212 | -0,615463436 |
| A_23_P104318   | NM_019058       | DDIT4        | DNA-damage-inducible transcript 4                             | ENST00000307365 | -0,615987156 |
| A_23_P104318   | NM_019058       | DDIT4        | DNA-damage-inducible transcript 4                             | ENST00000307365 | -0,616221527 |
| A_24_P319113   | NM_002562       | P2RX7        | purinergic receptor P2X, ligand-gated ion channel, 7          | ENST00000377162 | -0,616861895 |
| A_19_P00319553 | ENST00000424786 | XLOC_002612  |                                                               | ENST00000424786 | -0,617158448 |
| A_21_P0001290  | ENST00000429328 | XLOC_000175  |                                                               | ENST00000429328 | -0,617190282 |
| A_23_P256948   | NM_005098       | MSC          | musculin                                                      | ENST00000325509 | -0,617214633 |
| A_23_P106973   | NM_006640       | Sep-09       | septin 9                                                      | ENST00000329047 | -0,617238628 |
| A_23_P109171   | NM_001195       | BFSP1        | beaded filament structural protein 1, filensin                | ENST00000536626 | -0,617746664 |
| A_24_P235266   | NM_001001555    | GRB10        | growth factor receptor-bound protein 10                       | ENST00000403097 | -0,617953077 |
| A_23_P200138   | NM_020125       | SLAMF8       | SLAM family member 8                                          | ENST00000289707 | -0,618011867 |
| A_23_P13907    | NM_000618       | IGF1         | insulin-like growth factor 1 (somatomedin C)                  | ENST00000481539 | -0,61861612  |
| A_23_P106973   | NM_006640       | Sep-09       | septin 9                                                      | ENST00000329047 | -0,619354943 |
| A_23_P126593   | NM_005620       | S100A11      | S100 calcium binding protein A11                              | ENST00000271638 | -0,619393189 |
| A_23_P104318   | NM_019058       | DDIT4        | DNA-damage-inducible transcript 4                             | ENST00000307365 | -0,619454638 |
| A_24_P158089   | NM_000602       | SERPINE1     | serpin peptidase inhibitor, clade E (nexin, plasminogen activ | ENST00000445463 | -0,61946902  |
| A_23_P69383    | NM_031458       | PARP9        | poly (ADP-ribose) polymerase family, member 9                 | ENST00000452457 | -0,619693178 |
| A_21_P0013933  | XM_002342726    | LOC100287294 | equilibrative nucleoside transporter 4-like                   |                 | -0,619760459 |
| A_23_P106973   | NM_006640       | Sep-09       | septin 9                                                      | ENST00000329047 | -0,619824796 |
| A_23_P119102   | NM_003370       | VASP         | vasodilator-stimulated phosphoprotein                         | ENST00000245932 | -0,620169276 |

|                |                |              |                                                      |                 |              |
|----------------|----------------|--------------|------------------------------------------------------|-----------------|--------------|
| A_23_P412321   | NM_000579      | CCR5         | chemokine (C-C motif) receptor 5                     | ENST00000343801 | -0,620781821 |
| A_23_P104318   | NM_019058      | DDIT4        | DNA-damage-inducible transcript 4                    | ENST00000307365 | -0,620913391 |
| A_33_P3356731  | NM_015332      | NUDCD3       | NudC domain containing 3                             | ENST00000355451 | -0,621033638 |
| A_21_P0014356  | XR_109436      | LOC100507425 | uncharacterized LOC100507425                         |                 | -0,621541448 |
| A_23_P17065    | NM_004591      | CCL20        | chemokine (C-C motif) ligand 20                      | ENST00000473642 | -0,621916088 |
| A_23_P348383   | NM_001080522   | CC2D2A       | coiled-coil and C2 domain containing 2A              | ENST00000510333 | -0,621929095 |
| A_23_P114134   | NM_175711      | SSX3         | synovial sarcoma, X breakpoint 3                     | ENST00000376893 | -0,622062621 |
| A_23_P122077   | NM_016591      | GCNT4        | glucosaminyl (N-acetyl) transferase 4, core 2        | ENST00000322348 | -0,62233055  |
| A_23_P117782   | NM_018357      | LARP6        | La ribonucleoprotein domain family, member 6         | ENST00000299213 | -0,622517598 |
| A_21_P0002183  | TCONS_00003598 | XLOC_001386  |                                                      |                 | -0,622527762 |
| A_21_P0010222  | TCONS_00028969 | XLOC_013866  |                                                      |                 | -0,62291365  |
| A_23_P87879    | NM_001781      | CD69         | CD69 molecule                                        | ENST00000228434 | -0,623105204 |
| A_23_P119102   | NM_003370      | VASP         | vasodilator-stimulated phosphoprotein                | ENST00000245932 | -0,623715381 |
| A_23_P215634   | NM_001013398   | IGFBP3       | insulin-like growth factor binding protein 3         | ENST00000438491 | -0,624023821 |
| A_33_P3399571  | NM_004666      | VNN1         | vanin 1                                              | ENST00000367928 | -0,624105263 |
| A_33_P3614398  | AK096235       | LOC283516    | uncharacterized LOC283516                            |                 | -0,624117659 |
| A_33_P3363188  | NR_033856      | FLJ43315     | asparagine synthetase pseudogene                     |                 | -0,624275635 |
| A_23_P104438   | NM_032578      | MYPN         | myopalladin                                          | ENST00000354393 | -0,624482934 |
| A_21_P0001730  | THC2705771     | XLOC_000895  |                                                      |                 | -0,624502906 |
| A_33_P3376971  | NM_024111      | CHAC1        | ChaC, cation transport regulator homolog 1 (E. coli) | ENST00000446533 | -0,625012478 |
| A_23_P104318   | NM_019058      | DDIT4        | DNA-damage-inducible transcript 4                    | ENST00000307365 | -0,625025951 |
| A_19_P00802257 | NR_038842      | LOC728431    | uncharacterized LOC728431                            | ENST00000424989 | -0,625593723 |
| A_23_P119102   | NM_003370      | VASP         | vasodilator-stimulated phosphoprotein                | ENST00000245932 | -0,626047986 |
| A_23_P71926    | NM_002732      | PRKACG       | protein kinase, cAMP-dependent, catalytic, gamma     | ENST00000377276 | -0,626055947 |
| A_23_P106973   | NM_006640      | Sep-09       | septin 9                                             | ENST00000329047 | -0,626153895 |
| A_32_P89352    | NM_080676      | MACROD2      | MACRO domain containing 2                            | ENST00000217246 | -0,626244623 |
| A_23_P104318   | NM_019058      | DDIT4        | DNA-damage-inducible transcript 4                    | ENST00000307365 | -0,626252013 |
| A_23_P87545    | NM_021034      | IFITM3       | interferon induced transmembrane protein 3           | ENST00000531688 | -0,626691506 |
| A_23_P152782   | NM_005533      | IFI35        | interferon-induced protein 35                        | ENST00000538473 | -0,626724856 |



|               |                 |              |                                                                                    |                 |              |
|---------------|-----------------|--------------|------------------------------------------------------------------------------------|-----------------|--------------|
| A_32_P41026   | NM_001024956    | SC5DL        | sterol-C5-desaturase (ERG3 delta-5-desaturase homolog, <i>S. cerevisiae</i> )-like |                 | -0,627004951 |
| A_23_P55749   | NM_015719       | COL5A3       | collagen, type V, alpha 3                                                          | ENST00000264828 | -0,627136607 |
| A_33_P3265189 | NM_001942       | DSG1         | desmoglein 1                                                                       |                 | -0,627212636 |
| A_33_P3391656 | NM_033550       | TP53RK       | TP53 regulating kinase                                                             | ENST00000372114 | -0,627222736 |
| A_23_P25674   | NM_001823       | CKB          | creatine kinase, brain                                                             | ENST00000553652 | -0,627505124 |
| A_33_P3774867 | BC094703        | MGC11082     | uncharacterized LOC84777                                                           |                 | -0,627564904 |
| A_23_P106973  | NM_006640       | Sep-09       | septin 9                                                                           | ENST00000329047 | -0,627572503 |
| A_23_P31721   | NM_001951       | E2F5         | E2F transcription factor 5, p130-binding                                           | ENST00000517476 | -0,627713191 |
| A_23_P106973  | NM_006640       | Sep-09       | septin 9                                                                           | ENST00000329047 | -0,627857534 |
| A_23_P352266  | NM_000633       | BCL2         | B-cell CLL/lymphoma 2                                                              | ENST00000398117 | -0,62800293  |
| A_33_P3212804 | NM_001010859    | C22orf42     | chromosome 22 open reading frame 42                                                | ENST00000467813 | -0,628296361 |
| A_21_P0009516 | TCONS_00026396  | XLOC_012747  |                                                                                    |                 | -0,628495473 |
| A_33_P3272291 | NM_001818       | AKR1C4       | aldo-keto reductase family 1, member C4 (chlordecone redi                          | ENST00000397357 | -0,628751117 |
| A_21_P0000746 | NR_038273       | LOC100506874 | uncharacterized LOC100506874                                                       |                 | -0,628776275 |
| A_33_P3213064 | NM_005419       | STAT2        | signal transducer and activator of transcription 2, 113kDa                         | ENST00000556539 | -0,628808243 |
| A_23_P215634  | NM_001013398    | IGFBP3       | insulin-like growth factor binding protein 3                                       | ENST00000438491 | -0,629007841 |
| A_32_P480177  | NM_022093       | TNN          | tenascin N                                                                         | ENST00000239462 | -0,629426837 |
| A_23_P106973  | NM_006640       | Sep-09       | septin 9                                                                           | ENST00000329047 | -0,629530489 |
| A_23_P119102  | NM_003370       | VASP         | vasodilator-stimulated phosphoprotein                                              | ENST00000245932 | -0,629581671 |
| A_24_P344961  | NM_133265       | AMOT         | angiomin                                                                           | ENST00000371959 | -0,630119492 |
| A_33_P3390042 | NR_015409       | LOC143188    | uncharacterized LOC143188                                                          |                 | -0,630294358 |
| A_21_P0014724 | XR_112814       | LOC100507336 | uncharacterized LOC100507336                                                       |                 | -0,630375622 |
| A_21_P0014234 | XR_133523       | LOC100506897 |                                                                                    | ENST00000431813 | -0,63073391  |
| A_21_P0002531 | TCONS_00004544  | XLOC_002452  |                                                                                    |                 | -0,630864561 |
| A_24_P941866  | AK096941        | C5orf56      | chromosome 5 open reading frame 56                                                 | ENST00000337752 | -0,631197967 |
| A_23_P119102  | NM_003370       | VASP         | vasodilator-stimulated phosphoprotein                                              | ENST00000245932 | -0,631370344 |
| A_21_P0006039 | ENST00000411451 | XLOC_007502  |                                                                                    | ENST00000411451 | -0,631867988 |
| A_24_P334718  | NM_181791       | GPR141       | G protein-coupled receptor 141                                                     | ENST00000334425 | -0,632260839 |
| A_21_P0010773 | NR_033856       | FLJ43315     | asparagine synthetase pseudogene                                                   | ENST00000416367 | -0,632261571 |

|                |                 |                |                                                               |                 |              |
|----------------|-----------------|----------------|---------------------------------------------------------------|-----------------|--------------|
| A_33_P3381313  | NM_001109977    | FAM160A1       | family with sequence similarity 160, member A1                | ENST00000505231 | -0,632313572 |
| A_23_P119337   | NM_012068       | ATF5           | activating transcription factor 5                             | ENST00000423777 | -0,632523067 |
| A_24_P245815   | NM_020437       | ASPHD2         | aspartate beta-hydroxylase domain containing 2                | ENST00000215906 | -0,632793388 |
| A_24_P7594     | NM_030641       | APOL6          | apolipoprotein L, 6                                           |                 | -0,632863477 |
| A_23_P104318   | NM_019058       | DDIT4          | DNA-damage-inducible transcript 4                             | ENST00000307365 | -0,633013582 |
| A_23_P66432    | NM_032646       | TTYH2          | tweety homolog 2 (Drosophila)                                 | ENST00000441391 | -0,63347904  |
| A_23_P119337   | NM_012068       | ATF5           | activating transcription factor 5                             | ENST00000423777 | -0,633647966 |
| A_23_P69573    | NM_000856       | GUCY1A3        | guanylate cyclase 1, soluble, alpha 3                         | ENST00000455639 | -0,634220159 |
| A_23_P85240    | NM_016562       | TLR7           | toll-like receptor 7                                          | ENST00000380659 | -0,634808322 |
| A_24_P322353   | NM_024430       | PSTPIP2        | proline-serine-threonine phosphatase interacting protein 2    | ENST00000495213 | -0,635287328 |
| A_21_P0012014  | ENST00000458149 | XLOC_I2_007449 |                                                               | ENST00000458149 | -0,636121474 |
| A_24_P272761   | NM_020946       | DENND1A        | DENN/MADD domain containing 1A                                | ENST00000373624 | -0,636482299 |
| A_33_P3296707  | NM_001078173    | FAM127C        | family with sequence similarity 127, member C                 | ENST00000391440 | -0,636640503 |
| A_19_P00809886 | THC2537311      | Q16594         |                                                               |                 | -0,636689803 |
| A_23_P166797   | NM_022147       | RTP4           | receptor (chemosensory) transporter protein 4                 | ENST00000259030 | -0,636877    |
| A_24_P279489   | NM_001128159    | VPS53          | vacuolar protein sorting 53 homolog (S. cerevisiae)           | ENST00000437048 | -0,637339414 |
| A_33_P3242623  | NM_014331       | SLC7A11        | solute carrier family 7 (anionic amino acid transporter light | ENST00000280612 | -0,637491201 |
| A_19_P00321306 | NM_020914       | RNF213         |                                                               | ENST00000456466 | -0,637958525 |
| A_33_P3296281  | XM_003403470    | LOC100652922   | uncharacterized LOC100652922                                  |                 | -0,638594418 |
| A_21_P0005443  | NR_034033       | LOC285972      | uncharacterized LOC285972                                     |                 | -0,639122669 |
| A_23_P116512   | NM_024841       | PRR5L          | proline rich 5 like                                           | ENST00000389693 | -0,639201193 |
| A_33_P3409159  | NM_015482       | SLC22A23       | solute carrier family 22, member 23                           | ENST00000406686 | -0,639384183 |
| A_23_P340333   | NM_033397       | ITPRIP         | inositol 1,4,5-trisphosphate receptor interacting protein     | ENST00000358187 | -0,639398909 |
| A_32_P110472   | NM_203395       | IYD            | iodotyrosine deiodinase                                       | ENST00000229447 | -0,639974814 |
| A_33_P3381684  | NM_007113       | TCHH           | trichohyalin                                                  | ENST00000368804 | -0,639996335 |
| A_24_P177279   | NM_014460       | CSDC2          | cold shock domain containing C2, RNA binding                  | ENST00000306149 | -0,640252661 |
| A_21_P0009312  | TCONS_00025610  | XLOC_012442    |                                                               |                 | -0,6406112   |
| A_23_P119337   | NM_012068       | ATF5           | activating transcription factor 5                             | ENST00000423777 | -0,64097019  |
| A_19_P00804922 | TCONS_00008193  | XLOC_003641    |                                                               |                 | -0,641012562 |

|               |                 |               |                                                                                     |                 |              |
|---------------|-----------------|---------------|-------------------------------------------------------------------------------------|-----------------|--------------|
| A_21_P0014031 | NM_001123066    | MAPT          | microtubule-associated protein tau                                                  | ENST00000354326 | -0,641222893 |
| A_33_P3216227 | ENST00000360635 | ITGB1BP1      | integrin beta 1 binding protein 1                                                   | ENST00000360635 | -0,641229594 |
| A_21_P0003409 | ENST00000515860 | XLOC_003709   |                                                                                     | ENST00000515860 | -0,641294187 |
| A_23_P413303  | NR_033797       | DKFZP434I0714 | uncharacterized protein DKFZP434I0714                                               |                 | -0,641496925 |
| A_24_P158089  | NM_000602       | SERPINE1      | serpin peptidase inhibitor, clade E (nexin, plasminogen activator inhibitor type 1) | ENST00000445463 | -0,641646686 |
| A_33_P3271111 | NM_004148       | NINJ1         | ninjurin 1                                                                          | ENST00000489274 | -0,641669683 |
| A_23_P120822  | NM_016327       | UPB1          | ureidopropionase, beta                                                              | ENST00000326010 | -0,642038162 |
| A_23_P352266  | NM_000633       | BCL2          | B-cell CLL/lymphoma 2                                                               | ENST00000398117 | -0,642126497 |
| A_23_P160720  | NM_018664       | BATF3         | basic leucine zipper transcription factor, ATF-like 3                               | ENST00000478275 | -0,642285542 |
| A_23_P94754   | NM_005118       | TNFSF15       | tumor necrosis factor (ligand) superfamily, member 15                               | ENST00000374044 | -0,64243823  |
| A_23_P118254  | NM_001451       | FOXF1         | forkhead box F1                                                                     | ENST00000262426 | -0,643808301 |
| A_33_P3229552 | NM_020862       | LRFN1         | leucine rich repeat and fibronectin type III domain containing protein 1            | ENST00000248668 | -0,644188569 |
| A_21_P0002808 | ENST00000436078 | XLOC_002934   |                                                                                     | ENST00000436078 | -0,644288674 |
| A_23_P123228  | NM_000111       | SLC26A3       | solute carrier family 26, member 3                                                  | ENST00000340010 | -0,645096941 |
| A_24_P158089  | NM_000602       | SERPINE1      | serpin peptidase inhibitor, clade E (nexin, plasminogen activator inhibitor type 1) | ENST00000445463 | -0,645581129 |
| A_23_P145863  | NM_005620       | S100A11       | S100 calcium binding protein A11                                                    | ENST00000271638 | -0,645764057 |
| A_23_P122077  | NM_016591       | GCNT4         | glucosaminyl (N-acetyl) transferase 4, core 2                                       | ENST00000322348 | -0,64665717  |
| A_21_P0000575 | NR_029193       | LOC100287216  | uncharacterized LOC100287216                                                        |                 | -0,647055801 |
| A_23_P120822  | NM_016327       | UPB1          | ureidopropionase, beta                                                              | ENST00000326010 | -0,647107701 |
| A_24_P158089  | NM_000602       | SERPINE1      | serpin peptidase inhibitor, clade E (nexin, plasminogen activator inhibitor type 1) | ENST00000445463 | -0,647163972 |
| A_33_P3262575 | NM_018842       | BAIAP2L1      | BAI1-associated protein 2-like 1                                                    | ENST00000005260 | -0,64785197  |
| A_21_P0013736 | DQ673922        | NAMA          | non-protein coding RNA, associated with MAP kinase pathway and growth arrest        |                 | -0,647907579 |
| A_23_P2705    | NM_005767       | LPAR6         | lysophosphatidic acid receptor 6                                                    | ENST00000345941 | -0,647937615 |
| A_33_P3357609 | NM_001160419    | ZBP1          | Z-DNA binding protein 1                                                             | ENST00000343535 | -0,647957571 |
| A_23_P404162  | NM_014707       | HDAC9         | histone deacetylase 9                                                               | ENST00000405010 | -0,648206506 |
| A_24_P277657  | NM_006877       | GMPR          | guanosine monophosphate reductase                                                   | ENST00000540478 | -0,648241419 |
| A_33_P3367924 | NM_001080487    | PABPN1L       | poly(A) binding protein, nuclear 1-like (cytoplasmic)                               | ENST00000411789 | -0,64831655  |
| A_24_P241183  | NM_013269       | CLEC2D        | C-type lectin domain family 2, member D                                             | ENST00000487752 | -0,648857705 |
| A_24_P158089  | NM_000602       | SERPINE1      | serpin peptidase inhibitor, clade E (nexin, plasminogen activator inhibitor type 1) | ENST00000445463 | -0,64921115  |

|                |                  |                |                                                                                     |                 |              |
|----------------|------------------|----------------|-------------------------------------------------------------------------------------|-----------------|--------------|
| A_33_P3623118  | AK054653         | LOC153577      | uncharacterized LOC153577                                                           |                 | -0,649468496 |
| A_21_P0006026  | ENST00000421297  | XLOC_007450    |                                                                                     | ENST00000421297 | -0,649939696 |
| A_24_P272451   | AK057142         | C17orf87       | chromosome 17 open reading frame 87                                                 |                 | -0,650179118 |
| A_19_P00804072 | NM_020914        | RNF213         |                                                                                     | ENST00000456466 | -0,650375194 |
| A_23_P119102   | NM_003370        | VASP           | vasodilator-stimulated phosphoprotein                                               | ENST00000245932 | -0,650464602 |
| A_21_P0012477  | THC2685486       | XLOC_I2_010493 |                                                                                     |                 | -0,650642411 |
| A_24_P396753   | NM_021643        | TRIB2          | tribbles homolog 2 (Drosophila)                                                     | ENST00000155926 | -0,650653547 |
| A_23_P425752   | NM_033219        | TRIM14         | tripartite motif containing 14                                                      | ENST00000342043 | -0,650686793 |
| A_24_P274270   | NM_139266        | STAT1          | signal transducer and activator of transcription 1, 91kDa                           | ENST00000540176 | -0,650703654 |
| A_21_P0008555  | AK056686         | XLOC_011237    |                                                                                     |                 | -0,650907821 |
| A_23_P403991   | NM_024080        | TRPM8          | transient receptor potential cation channel, subfamily M, m                         | ENST00000324695 | -0,650966655 |
| A_23_P122052   | NM_001008397     | GPX8           | glutathione peroxidase 8 (putative)                                                 | ENST00000503787 | -0,651318567 |
| A_23_P120822   | NM_016327        | UPB1           | ureidopropionase, beta                                                              | ENST00000326010 | -0,651561188 |
| A_24_P158089   | NM_000602        | SERPINE1       | serpin peptidase inhibitor, clade E (nexin, plasminogen activator inhibitor type 1) | ENST00000445463 | -0,651694671 |
| A_33_P3328360  | NR_027033        | MIRLET7BHG     | MIRLET7B host gene (non-protein coding)                                             | ENST00000360737 | -0,651730557 |
| A_33_P3324114  | NR_015391        | LSAMP-AS3      | LSAMP antisense RNA 3 (non-protein coding)                                          | ENST00000477539 | -0,652047459 |
| A_23_P102083   | NM_033030        | BOLL           | bol, boule-like (Drosophila)                                                        | ENST00000433157 | -0,65299472  |
| A_21_P0014538  | XR_110235        | LOC100506817   | uncharacterized LOC100506817                                                        | ENST00000553712 | -0,653118564 |
| A_23_P352266   | NM_000633        | BCL2           | B-cell CLL/lymphoma 2                                                               | ENST00000398117 | -0,653167912 |
| A_23_P318616   | NM_001039029     | LRTM2          | leucine-rich repeats and transmembrane domains 2                                    | ENST00000543818 | -0,65361458  |
| A_21_P0010962  | TCONS_I2_0000434 | XLOC_I2_002204 |                                                                                     |                 | -0,653624106 |
| A_32_P60065    | NM_004101        | F2RL2          | coagulation factor II (thrombin) receptor-like 2                                    | ENST00000296641 | -0,654291607 |
| A_33_P3258392  | NM_001955        | EDN1           | endothelin 1                                                                        | ENST00000379375 | -0,654466464 |
| A_21_P0009303  | TCONS_00025577   | XLOC_012404    |                                                                                     |                 | -0,654858029 |
| A_24_P158089   | NM_000602        | SERPINE1       | serpin peptidase inhibitor, clade E (nexin, plasminogen activator inhibitor type 1) | ENST00000445463 | -0,65541122  |
| A_23_P87879    | NM_001781        | CD69           | CD69 molecule                                                                       | ENST00000228434 | -0,655792434 |
| A_23_P201248   | NM_052934        | SLC26A9        | solute carrier family 26, member 9                                                  | ENST00000367134 | -0,65609716  |
| A_33_P3410351  | NM_000848        | GSTM2          | glutathione S-transferase mu 2 (muscle)                                             | ENST00000476040 | -0,656181688 |
| A_24_P188800   | NM_017923        | Mar-01         | membrane-associated ring finger (C3HC4) 1                                           | ENST00000339875 | -0,656871645 |

|                |                 |                |                                                                |                 |              |
|----------------|-----------------|----------------|----------------------------------------------------------------|-----------------|--------------|
| A_24_P102293   | NM_015567       | SLITRK5        | SLIT and NTRK-like family, member 5                            | ENST00000325089 | -0,656903061 |
| A_23_P300150   | NM_172387       | NFATC1         | nuclear factor of activated T-cells, cytoplasmic, calcineurin- | ENST00000318065 | -0,657058725 |
| A_23_P52761    | NM_002423       | MMP7           | matrix metalloproteinase 7 (matrilysin, uterine)               | ENST00000260227 | -0,657286846 |
| A_24_P274270   | NM_139266       | STAT1          | signal transducer and activator of transcription 1, 91kDa      | ENST00000540176 | -0,658027997 |
| A_23_P16953    | NM_000867       | HTR2B          | 5-hydroxytryptamine (serotonin) receptor 2B                    | ENST00000540289 | -0,658037264 |
| A_24_P153568   | NM_001039396    | MPEG1          | macrophage expressed 1                                         | ENST00000361050 | -0,658206855 |
| A_33_P3314813  | NM_001080446    | C11orf94       | chromosome 11 open reading frame 94                            | ENST00000449465 | -0,658358385 |
| A_23_P352266   | NM_000633       | BCL2           | B-cell CLL/lymphoma 2                                          | ENST00000398117 | -0,658417601 |
| A_23_P166848   | NM_002343       | LTF            | lactotransferrin                                               | ENST00000426532 | -0,658535696 |
| A_23_P119337   | NM_012068       | ATF5           | activating transcription factor 5                              | ENST00000423777 | -0,65872788  |
| A_21_P0003549  | NR_039975       | LOC100506229   | uncharacterized LOC100506229                                   | ENST00000515864 | -0,659017756 |
| A_23_P32404    | NM_002201       | ISG20          | interferon stimulated exonuclease gene 20kDa                   | ENST00000546338 | -0,65917598  |
| A_24_P274270   | NM_139266       | STAT1          | signal transducer and activator of transcription 1, 91kDa      | ENST00000540176 | -0,659788017 |
| A_23_P75299    | NM_022126       | LHPP           | phospholysine phosphohistidine inorganic pyrophosphate p       | ENST00000368842 | -0,660111668 |
| A_23_P210763   | NM_000214       | JAG1           | jagged 1                                                       | ENST00000254958 | -0,660623489 |
| A_23_P120822   | NM_016327       | UPB1           | ureidopropionase, beta                                         | ENST00000326010 | -0,660676377 |
| A_19_P00322152 | ENST00000423530 | XLOC_l2_008434 |                                                                | ENST00000423530 | -0,660833869 |
| A_23_P500381   | NM_019859       | HTR7           | 5-hydroxytryptamine (serotonin) receptor 7 (adenylate cycl     | ENST00000336152 | -0,660856167 |
| A_23_P250358   | NM_017912       | HERC6          | hect domain and RLD 6                                          | ENST00000511939 | -0,661269205 |
| A_24_P937405   | NM_007173       | PRSS23         | protease, serine, 23                                           | ENST00000280258 | -0,66135698  |
| A_23_P119337   | NM_012068       | ATF5           | activating transcription factor 5                              | ENST00000423777 | -0,661638601 |
| A_32_P465742   | NM_003558       | PIP5K1B        | phosphatidylinositol-4-phosphate 5-kinase, type I, beta        | ENST00000265382 | -0,662100513 |
| A_33_P3638471  | BC027954        | TRGV7          | T cell receptor gamma variable 7 (pseudogene)                  |                 | -0,662123583 |
| A_24_P274270   | NM_139266       | STAT1          | signal transducer and activator of transcription 1, 91kDa      | ENST00000540176 | -0,662178709 |
| A_24_P117029   | NM_000527       | LDLR           | low density lipoprotein receptor                               | ENST00000252444 | -0,662404099 |
| A_21_P0006135  | TCONS_00015940  | XLOC_007308    |                                                                |                 | -0,662412547 |
| A_21_P0002379  | TCONS_00004094  | XLOC_001929    |                                                                |                 | -0,662978833 |
| A_24_P206343   | NM_033054       | MYO1G          | myosin IG                                                      | ENST00000488554 | -0,663625688 |
| A_33_P3281191  | NM_002508       | NID1           | nidogen 1                                                      | ENST00000366595 | -0,663682447 |



|               |                |             |                                                               |                 |              |
|---------------|----------------|-------------|---------------------------------------------------------------|-----------------|--------------|
| A_24_P382187  | NM_001552      | IGFBP4      | insulin-like growth factor binding protein 4                  | ENST00000269593 | -0,663815177 |
| A_33_P3282566 | NM_017728      | TMEM104     | transmembrane protein 104                                     | ENST00000335464 | -0,664571716 |
| A_32_P336776  | NM_194277      | FRMD7       | FERM domain containing 7                                      | ENST00000298542 | -0,664919006 |
| A_23_P216225  | NM_004430      | EGR3        | early growth response 3                                       | ENST00000317216 | -0,665223735 |
| A_23_P119337  | NM_012068      | ATF5        | activating transcription factor 5                             | ENST00000423777 | -0,665847228 |
| A_33_P3292254 | NR_024481      | FAM205B     | transmembrane protein C9orf144B pseudogene                    |                 | -0,666490753 |
| A_32_P132860  | NR_024280      | UNQ6494     | uncharacterized LOC100129066                                  |                 | -0,666526229 |
| A_23_P87879   | NM_001781      | CD69        | CD69 molecule                                                 | ENST00000228434 | -0,666930009 |
| A_23_P120822  | NM_016327      | UPB1        | ureidopropionase, beta                                        | ENST00000326010 | -0,667191224 |
| A_21_P0003919 | BC095491       | FRG1B       | FSHD region gene 1 family, member B                           |                 | -0,66740774  |
| A_23_P120002  | NM_004510      | SP110       | SP110 nuclear body protein                                    | ENST00000338556 | -0,667524193 |
| A_24_P152968  | NM_001353      | AKR1C1      | aldo-keto reductase family 1, member C1 (dihydrodiol dehy     | ENST00000434459 | -0,667612619 |
| A_33_P3407289 | NR_027436      | LOC283788   | FSHD region gene 1 pseudogene                                 | ENST00000418749 | -0,667804362 |
| A_23_P352266  | NM_000633      | BCL2        | B-cell CLL/lymphoma 2                                         | ENST00000398117 | -0,667887261 |
| A_21_P0001620 | TCONS_00001811 | XLOC_001195 |                                                               |                 | -0,667977492 |
| A_24_P353638  | NM_021181      | SLAMF7      | SLAM family member 7                                          | ENST00000466792 | -0,668164872 |
| A_33_P3309561 | NM_001098503   | PTPRJ       | protein tyrosine phosphatase, receptor type, J                | ENST00000440289 | -0,668170663 |
| A_33_P3399263 | NM_001243539   | IL15RA      | interleukin 15 receptor, alpha                                | ENST00000379972 | -0,668615845 |
| A_24_P274270  | NM_139266      | STAT1       | signal transducer and activator of transcription 1, 91kDa     | ENST00000540176 | -0,668690024 |
| A_33_P3318509 | NM_014358      | CLEC4E      | C-type lectin domain family 4, member E                       | ENST00000299663 | -0,668695057 |
| A_23_P160214  | NM_001080494   | TTC39A      | tetratricopeptide repeat domain 39A                           | ENST00000451380 | -0,669215392 |
| A_23_P13382   | NM_001013254   | LSP1        | lymphocyte-specific protein 1                                 | ENST00000406638 | -0,67095188  |
| A_24_P158089  | NM_000602      | SERPINE1    | serpin peptidase inhibitor, clade E (nexin, plasminogen activ | ENST00000445463 | -0,671185045 |
| A_33_P3405514 | NM_001204811   | MAGEA10-MAG | MAGEA10-MAGEA5 readthrough                                    | ENST00000427663 | -0,671203348 |
| A_23_P119337  | NM_012068      | ATF5        | activating transcription factor 5                             | ENST00000423777 | -0,671254067 |
| A_24_P274270  | NM_139266      | STAT1       | signal transducer and activator of transcription 1, 91kDa     | ENST00000540176 | -0,671593766 |
| A_23_P122508  | NM_080870      | DPCR1       | diffuse panbronchiolitis critical region 1                    | ENST00000414703 | -0,671650618 |
| A_33_P3354451 | NM_007028      | TRIM31      | tripartite motif containing 31                                | ENST00000540829 | -0,671742361 |
| A_21_P0003446 | TCONS_00007714 | XLOC_003872 |                                                               |                 | -0,672032498 |

|                |                  |                |                                                                |                 |              |
|----------------|------------------|----------------|----------------------------------------------------------------|-----------------|--------------|
| A_23_P83200    | NM_152572        | AK8            | adenylate kinase 8                                             | ENST00000467161 | -0,672200817 |
| A_21_P0005568  | TCONS_00014163   | XLOC_006150    |                                                                |                 | -0,672293465 |
| A_23_P99360    | NM_213590        | TRIM13         | tripartite motif containing 13                                 | ENST00000378182 | -0,672491727 |
| A_24_P274270   | NM_139266        | STAT1          | signal transducer and activator of transcription 1, 91kDa      | ENST00000540176 | -0,672888289 |
| A_33_P3370449  | NM_152413        | GOT1L1         | glutamic-oxaloacetic transaminase 1-like 1                     | ENST00000307599 | -0,673403384 |
| A_23_P119337   | NM_012068        | ATF5           | activating transcription factor 5                              | ENST00000423777 | -0,673763643 |
| A_23_P255104   | NM_005779        | LHFPL2         | lipoma HMGIC fusion partner-like 2                             | ENST00000515007 | -0,67387356  |
| A_33_P3416387  | NR_004385        | RNU105C        | RNA, U105C small nucleolar                                     |                 | -0,674961013 |
| A_21_P0008358  | ENST00000554225  | XLOC_010879    |                                                                | ENST00000554225 | -0,6759112   |
| A_24_P274270   | NM_139266        | STAT1          | signal transducer and activator of transcription 1, 91kDa      | ENST00000540176 | -0,675983707 |
| A_21_P0000015  | NM_001146106     | PARP9          | poly (ADP-ribose) polymerase family, member 9                  | ENST00000462315 | -0,677744636 |
| A_23_P58132    | NM_004310        | RHOH           | ras homolog gene family, member H                              | ENST00000381799 | -0,677756914 |
| A_23_P422732   | NM_145172        | WDR63          | WD repeat domain 63                                            | ENST00000294664 | -0,677790164 |
| A_21_P0013353  | TCONS_I2_0002695 | XLOC_I2_014048 |                                                                |                 | -0,678131042 |
| A_24_P45446    | NM_052941        | GBP4           | guanylate binding protein 4                                    | ENST00000471938 | -0,678702285 |
| A_33_P3295200  | NM_001523        | HAS1           | hyaluronan synthase 1                                          | ENST00000376738 | -0,678736279 |
| A_33_P3294237  | NM_005955        | MTF1           | metal-regulatory transcription factor 1                        |                 | -0,678758921 |
| A_23_P201376   | NM_014021        | SSX2IP         | synovial sarcoma, X breakpoint 2 interacting protein           | ENST00000437941 | -0,679951099 |
| A_33_P3295203  | NM_001523        | HAS1           | hyaluronan synthase 1                                          | ENST00000376737 | -0,680225405 |
| A_24_P102880   | NM_020443        | NAV1           | neuron navigator 1                                             | ENST00000367296 | -0,680572383 |
| A_23_P120428   | NM_014477        | TP53TG5        | TP53 target 5                                                  | ENST00000494455 | -0,680681309 |
| A_19_P00320570 | TCONS_00010154   | XLOC_004620    |                                                                |                 | -0,681658873 |
| A_19_P00318517 | CN294843         | XLOC_014192    |                                                                |                 | -0,682491012 |
| A_23_P320578   | NM_002928        | RGS16          | regulator of G-protein signaling 16                            | ENST00000367558 | -0,683024848 |
| A_21_P0014373  | XR_109500        | LOC100506419   | uncharacterized LOC100506419                                   |                 | -0,683085666 |
| A_21_P0014105  | ENST00000413820  | LOC100505565   |                                                                | ENST00000413820 | -0,684005789 |
| A_23_P208293   | NM_001042724     | PVRL2          | poliovirus receptor-related 2 (herpesvirus entry mediator B)   | ENST00000252483 | -0,684107062 |
| A_21_P0000665  | NR_036546        | LOC100271702   | uncharacterized LOC100271702                                   |                 | -0,68467392  |
| A_33_P3316539  | NM_001008539     | SLC7A2         | solute carrier family 7 (cationic amino acid transporter, y+ s | ENST00000004531 | -0,684823556 |

|               |                 |              |                                                                                     |                 |              |
|---------------|-----------------|--------------|-------------------------------------------------------------------------------------|-----------------|--------------|
| A_23_P116512  | NM_024841       | PRR5L        | proline rich 5 like                                                                 | ENST00000389693 | -0,68530141  |
| A_33_P3332474 | NM_001001413    | GOLGA6L1     | golgin A6 family-like 1                                                             | ENST00000424531 | -0,685894104 |
| A_24_P236235  | NM_013231       | FLRT2        | fibronectin leucine rich transmembrane protein 2                                    | ENST00000330753 | -0,685973034 |
| A_33_P3304668 | NM_000088       | COL1A1       | collagen, type I, alpha 1                                                           | ENST00000225964 | -0,686433362 |
| A_23_P335452  | NM_153367       | ZCCHC24      | zinc finger, CCHC domain containing 24                                              | ENST00000372336 | -0,687214709 |
| A_33_P3303810 | NM_005558       | LAD1         | ladinin 1                                                                           | ENST00000367313 | -0,687938774 |
| A_23_P145874  | NM_152703       | SAMD9L       | sterile alpha motif domain containing 9-like                                        | ENST00000411955 | -0,688559955 |
| A_23_P352266  | NM_000633       | BCL2         | B-cell CLL/lymphoma 2                                                               | ENST00000398117 | -0,68859663  |
| A_24_P274270  | NM_139266       | STAT1        | signal transducer and activator of transcription 1, 91kDa                           | ENST00000540176 | -0,68869538  |
| A_21_P0009401 | TCONS_00026020  | XLOC_012360  |                                                                                     |                 | -0,688954795 |
| A_24_P402588  | NM_018014       | BCL11A       | B-cell CLL/lymphoma 11A (zinc finger protein)                                       | ENST00000489516 | -0,689457935 |
| A_24_P158089  | NM_000602       | SERPINE1     | serpin peptidase inhibitor, clade E (nexin, plasminogen activator inhibitor type 1) | ENST00000445463 | -0,689913573 |
| A_33_P3285277 | NM_001167945    | CACNB2       | calcium channel, voltage-dependent, beta 2 subunit                                  | ENST00000498816 | -0,690183364 |
| A_23_P26325   | NM_002987       | CCL17        | chemokine (C-C motif) ligand 17                                                     | ENST00000219244 | -0,690247665 |
| A_23_P68155   | NM_022168       | IFIH1        | interferon induced with helicase C domain 1                                         | ENST00000543192 | -0,690684976 |
| A_23_P62642   | NM_012337       | CCDC19       | coiled-coil domain containing 19                                                    | ENST00000475911 | -0,69110455  |
| A_33_P3264846 | NM_152703       | SAMD9L       | sterile alpha motif domain containing 9-like                                        | ENST00000394472 | -0,6911281   |
| A_23_P31996   | NM_033051       | SLC46A2      | solute carrier family 46, member 2                                                  | ENST00000374228 | -0,691787174 |
| A_23_P113701  | NM_002607       | PDGFA        | platelet-derived growth factor alpha polypeptide                                    | ENST00000402802 | -0,691921902 |
| A_23_P352266  | NM_000633       | BCL2         | B-cell CLL/lymphoma 2                                                               | ENST00000398117 | -0,692905818 |
| A_21_P0004772 | ENST00000452675 | XLOC_005810  |                                                                                     | ENST00000452675 | -0,693093153 |
| A_21_P0003118 | TCONS_00006511  | XLOC_003125  |                                                                                     |                 | -0,693407839 |
| A_33_P3376965 | NM_024111       | CHAC1        | ChaC, cation transport regulator homolog 1 (E. coli)                                | ENST00000487220 | -0,693737128 |
| A_24_P148717  | NM_001295       | CCR1         | chemokine (C-C motif) receptor 1                                                    | ENST00000296140 | -0,693737987 |
| A_24_P274270  | NM_139266       | STAT1        | signal transducer and activator of transcription 1, 91kDa                           | ENST00000540176 | -0,693958357 |
| A_21_P0014653 | XR_110911       | LOC100507521 | uncharacterized LOC100507521                                                        | ENST00000524942 | -0,694104816 |
| A_21_P0006517 | THC2671943      | XLOC_008072  |                                                                                     |                 | -0,694147189 |
| A_24_P942321  | NM_018027       | FRMD4A       | FERM domain containing 4A                                                           | ENST00000357447 | -0,694595278 |
| A_21_P0002907 | ENST00000441185 | XLOC_003327  |                                                                                     | ENST00000441185 | -0,69496523  |

|               |                 |              |                                                               |                 |              |
|---------------|-----------------|--------------|---------------------------------------------------------------|-----------------|--------------|
| A_33_P3415052 | NM_001172292    | NIPAL4       | NIPA-like domain containing 4                                 |                 | -0,695520987 |
| A_33_P3361891 | NM_001042575    | TMPRSS7      | transmembrane protease, serine 7                              | ENST00000419127 | -0,695594545 |
| A_24_P158089  | NM_000602       | SERPINE1     | serpin peptidase inhibitor, clade E (nexin, plasminogen activ | ENST00000445463 | -0,696377918 |
| A_21_P0002334 | THC2686815      | XLOC_001788  |                                                               |                 | -0,697890205 |
| A_24_P349039  | NM_020754       | ARHGAP31     | Rho GTPase activating protein 31                              | ENST00000264245 | -0,698205286 |
| A_24_P89457   | NM_078467       | CDKN1A       | cyclin-dependent kinase inhibitor 1A (p21, Cip1)              | ENST00000478800 | -0,699678266 |
| A_23_P358944  | NM_033244       | PML          | promyelocytic leukemia                                        | ENST00000435786 | -0,699778288 |
| A_33_P3214105 | NM_001674       | ATF3         | activating transcription factor 3                             | ENST00000366981 | -0,700607928 |
| A_21_P0002658 | NR_037631       | LOC100288911 | uncharacterized LOC100288911                                  |                 | -0,701875315 |
| A_21_P0001225 | ENST00000433576 | XLOC_001214  |                                                               | ENST00000433576 | -0,701882888 |
| A_24_P158718  | NM_015177       | DTX4         | deltex homolog 4 (Drosophila)                                 | ENST00000227451 | -0,702232459 |
| A_33_P3223002 | NM_018485       | GPR77        | G protein-coupled receptor 77                                 | ENST00000257267 | -0,702390364 |
| A_32_P231617  | NM_014220       | TM4SF1       | transmembrane 4 L six family member 1                         | ENST00000383054 | -0,703630669 |
| A_23_P49539   | NM_001080519    | BAHCC1       | BAH domain and coiled-coil containing 1                       | ENST00000307745 | -0,703821102 |
| A_23_P82523   | NM_000927       | ABCB1        | ATP-binding cassette, sub-family B (MDR/TAP), member 1        | ENST00000475929 | -0,703972481 |
| A_23_P384329  | NM_001144823    | DENND4A      | DENN/MADD domain containing 4A                                | ENST00000443035 | -0,705121128 |
| A_23_P64913   | NM_006205       | PDE6H        | phosphodiesterase 6H, cGMP-specific, cone, gamma              | ENST00000266395 | -0,707257824 |
| A_23_P36531   | NM_004616       | TSPAN8       | tetraspanin 8                                                 | ENST00000546561 | -0,707488119 |
| A_23_P321388  | NM_153341       | RNF19B       | ring finger protein 19B                                       | ENST00000405457 | -0,707781716 |
| A_23_P74290   | NM_052942       | GBP5         | guanylate binding protein 5                                   | ENST00000490568 | -0,708025189 |
| A_24_P11061   | NM_153478       | CSAG1        | chondrosarcoma associated gene 1                              | ENST00000452779 | -0,708088965 |
| A_21_P0009773 | TCONS_00027385  | XLOC_013370  |                                                               |                 | -0,708095249 |
| A_23_P77437   | NM_019023       | PRMT7        | protein arginine methyltransferase 7                          | ENST00000441236 | -0,708698284 |
| A_24_P192301  | NM_006080       | SEMA3A       | sema domain, immunoglobulin domain (Ig), short basic don      | ENST00000265362 | -0,709290548 |
| A_23_P9883    | NM_001079821    | NLRP3        | NLR family, pyrin domain containing 3                         | ENST00000336119 | -0,709372798 |
| A_33_P3362696 | NM_018157       | RIC8B        | resistance to inhibitors of cholinesterase 8 homolog B (C. el | ENST00000392837 | -0,709768668 |
| A_23_P113161  | NM_030806       | C1orf21      | chromosome 1 open reading frame 21                            | ENST00000235307 | -0,709815002 |
| A_33_P3209866 | NM_153186       | KANK1        | KN motif and ankyrin repeat domains 1                         | ENST00000382289 | -0,709831046 |
| A_32_P206839  | NR_037631       | LOC100288911 | uncharacterized LOC100288911                                  |                 | -0,710531395 |

|                |                  |                |                                                            |                 |              |
|----------------|------------------|----------------|------------------------------------------------------------|-----------------|--------------|
| A_23_P139500   | NM_030762        | BHLHE41        | basic helix-loop-helix family, member e41                  | ENST00000242728 | -0,711172676 |
| A_24_P373844   | NM_024076        | KCTD15         | potassium channel tetramerisation domain containing 15     | ENST00000284006 | -0,711214607 |
| A_24_P270460   | NM_005532        | IFI27          | interferon, alpha-inducible protein 27                     | ENST00000555121 | -0,713006106 |
| A_23_P23639    | NM_153259        | MCOLN2         | mucolipin 2                                                | ENST00000530971 | -0,713337952 |
| A_32_P118568   | NR_002727        | RFPL1-AS1      | RFPL1 antisense RNA 1 (non-protein coding)                 | ENST00000461286 | -0,713591165 |
| A_21_P0009147  | NR_038847        | LOC100505576   | uncharacterized LOC100505576                               |                 | -0,713705696 |
| A_33_P3249589  | NM_022893        | BCL11A         | B-cell CLL/lymphoma 11A (zinc finger protein)              | ENST00000358510 | -0,714274279 |
| A_23_P46936    | NM_000399        | EGR2           | early growth response 2                                    | ENST00000411732 | -0,714498852 |
| A_33_P3377151  | NM_006274        | CCL19          | chemokine (C-C motif) ligand 19                            | ENST00000378800 | -0,714720885 |
| A_33_P3337901  | NM_001198834     | PDE4DIP        | phosphodiesterase 4D interacting protein                   | ENST00000494734 | -0,715424478 |
| A_33_P3372910  | NM_014314        | DDX58          | DEAD (Asp-Glu-Ala-Asp) box polypeptide 58                  | ENST00000379882 | -0,716101415 |
| A_21_P0010605  | TCONS_I2_0000107 | XLOC_I2_000804 |                                                            |                 | -0,71648468  |
| A_23_P366230   | NM_004690        | LATS1          | LATS, large tumor suppressor, homolog 1 (Drosophila)       | ENST00000253339 | -0,716858449 |
| A_24_P751074   | NM_005238        | ETS1           | v-ets erythroblastosis virus E26 oncogene homolog 1 (avian | ENST00000392668 | -0,718150257 |
| A_21_P0010882  | ENST00000443523  | XLOC_I2_001986 |                                                            | ENST00000443523 | -0,718253911 |
| A_23_P119337   | NM_012068        | ATF5           | activating transcription factor 5                          | ENST00000423777 | -0,718267362 |
| A_33_P3316273  | NM_002983        | CCL3           | chemokine (C-C motif) ligand 3                             | ENST00000470334 | -0,718441105 |
| A_32_P119248   | NM_207305        | FOXD4          | forkhead box D4                                            | ENST00000382500 | -0,718452399 |
| A_24_P403417   | NM_004878        | PTGES          | prostaglandin E synthase                                   | ENST00000481476 | -0,718907945 |
| A_23_P372308   | NM_020211        | RGMA           | RGM domain family, member A                                | ENST00000538818 | -0,719220518 |
| A_19_P00803093 | THC2728684       | Q3AHP4         |                                                            |                 | -0,720109442 |
| A_23_P37702    | NM_003294        | TPSAB1         | tryptase alpha/beta 1                                      | ENST00000445910 | -0,720435784 |
| A_33_P3342126  | NM_020226        | PRDM8          | PR domain containing 8                                     | ENST00000415738 | -0,721693835 |
| A_23_P87879    | NM_001781        | CD69           | CD69 molecule                                              | ENST00000228434 | -0,721775337 |
| A_23_P119337   | NM_012068        | ATF5           | activating transcription factor 5                          | ENST00000423777 | -0,722345103 |
| A_21_P0004914  | TCONS_00011908   | XLOC_005409    |                                                            |                 | -0,722642923 |
| A_23_P138680   | NM_172200        | IL15RA         | interleukin 15 receptor, alpha                             | ENST00000379972 | -0,722935604 |
| A_21_P0013498  | TCONS_I2_0002789 | XLOC_I2_014289 |                                                            |                 | -0,723046337 |
| A_23_P312752   | NM_002242        | KCNJ13         | potassium inwardly-rectifying channel, subfamily J, member | ENST00000233826 | -0,723359116 |



|               |                                 |              |                                                         |                 |              |
|---------------|---------------------------------|--------------|---------------------------------------------------------|-----------------|--------------|
| A_23_P215634  | NM_001013398                    | IGFBP3       | insulin-like growth factor binding protein 3            | ENST00000438491 | -0,723539632 |
| A_23_P120845  | NM_005080                       | XBP1         | X-box binding protein 1                                 | ENST00000415306 | -0,723984552 |
| A_23_P118254  | NM_001451                       | FOXF1        | forkhead box F1                                         | ENST00000262426 | -0,72427635  |
| A_21_P0014461 | XR_109940                       | LOC100506934 | uncharacterized LOC100506934                            |                 | -0,724822817 |
| A_33_P3211432 | NM_000265                       | NCF1         | neutrophil cytosolic factor 1                           | ENST00000289473 | -0,725489352 |
| A_23_P203475  | NM_145040                       | PRKCDBP      | protein kinase C, delta binding protein                 | ENST00000303927 | -0,725533063 |
| A_21_P0010669 | TCONS_I2_0000176:XLOC_I2_001302 |              |                                                         |                 | -0,725759041 |
| A_33_P3424067 | NM_017635                       | SUV420H1     | suppressor of variegation 4-20 homolog 1 (Drosophila)   | ENST00000304363 | -0,726321604 |
| A_24_P363548  | NM_005338                       | HIP1         | huntingtin interacting protein 1                        | ENST00000336926 | -0,726738602 |
| A_24_P941217  | ENST00000321276                 | SGPP2        | sphingosine-1-phosphate phosphatase 2                   | ENST00000321276 | -0,727935477 |
| A_24_P116017  | NM_002813                       | PSMD9        | proteasome (prosome, macropain) 26S subunit, non-ATPase | ENST00000541212 | -0,728429817 |
| A_23_P1691    | NM_002421                       | MMP1         | matrix metalloproteinase 1 (interstitial collagenase)   | ENST00000315274 | -0,728543327 |
| A_23_P215634  | NM_001013398                    | IGFBP3       | insulin-like growth factor binding protein 3            | ENST00000438491 | -0,729892208 |
| A_24_P320033  | NM_005191                       | CD80         | CD80 molecule                                           | ENST00000264246 | -0,731765182 |
| A_21_P0000869 | NR_039975                       | LOC100506229 | uncharacterized LOC100506229                            |                 | -0,732283702 |
| A_23_P104438  | NM_032578                       | MYPN         | myopalladin                                             | ENST00000354393 | -0,732844683 |
| A_23_P215634  | NM_001013398                    | IGFBP3       | insulin-like growth factor binding protein 3            | ENST00000438491 | -0,733238186 |
| A_23_P1691    | NM_002421                       | MMP1         | matrix metalloproteinase 1 (interstitial collagenase)   | ENST00000315274 | -0,733285608 |
| A_24_P278126  | NM_002485                       | NBN          | nibrin                                                  | ENST00000396252 | -0,733765186 |
| A_32_P56001   | NM_012072                       | CD93         | CD93 molecule                                           | ENST00000246006 | -0,734317143 |
| A_23_P104438  | NM_032578                       | MYPN         | myopalladin                                             | ENST00000354393 | -0,737627925 |
| A_23_P69310   | NM_003965                       | CCRL2        | chemokine (C-C motif) receptor-like 2                   | ENST00000400882 | -0,738147683 |
| A_23_P23947   | NM_005204                       | MAP3K8       | mitogen-activated protein kinase kinase kinase 8        | ENST00000263056 | -0,7385041   |
| A_33_P3250383 | NM_033133                       | CNP          | 2',3'-cyclic nucleotide 3' phosphodiesterase            |                 | -0,739502516 |
| A_32_P220770  | NR_002812                       | HCG26        | HLA complex group 26 (non-protein coding)               |                 | -0,739621652 |
| A_21_P0012227 | TCONS_I2_0001746:XLOC_I2_009172 |              |                                                         |                 | -0,740045129 |
| A_33_P3317613 | NM_133625                       | SYN2         | synapsin II                                             | ENST00000540660 | -0,740500751 |
| A_23_P120845  | NM_005080                       | XBP1         | X-box binding protein 1                                 | ENST00000415306 | -0,742039152 |
| A_33_P3322999 | NM_001164375                    | C10orf105    | chromosome 10 open reading frame 105                    | ENST00000398786 | -0,742342307 |

|                |                 |              |                                                                      |                 |              |
|----------------|-----------------|--------------|----------------------------------------------------------------------|-----------------|--------------|
| A_21_P0011664  | NR_027417       | LOC644669    | ankyrin repeat domain 30B pseudogene                                 | ENST00000455308 | -0,742963966 |
| A_23_P118254   | NM_001451       | FOXF1        | forkhead box F1                                                      | ENST00000262426 | -0,743367234 |
| A_23_P144916   | NM_005110       | GFPT2        | glutamine-fructose-6-phosphate transaminase 2                        | ENST00000253778 | -0,744337504 |
| A_23_P120845   | NM_005080       | XBP1         | X-box binding protein 1                                              | ENST00000415306 | -0,745484361 |
| A_23_P218369   | NM_032963       | CCL14        | chemokine (C-C motif) ligand 14                                      | ENST00000536149 | -0,746755069 |
| A_19_P00315804 | NR_015375       | FLJ35024     | uncharacterized LOC401491                                            |                 | -0,746859507 |
| A_23_P253692   | NM_001079858    | GPR64        | G protein-coupled receptor 64                                        | ENST00000356606 | -0,748155295 |
| A_23_P120845   | NM_005080       | XBP1         | X-box binding protein 1                                              | ENST00000415306 | -0,748400694 |
| A_33_P3402489  | NM_006187       | OAS3         | 2'-5'-oligoadenylate synthetase 3, 100kDa                            | ENST00000228928 | -0,748432518 |
| A_33_P3407013  | ENST00000420258 | IL6          | interleukin 6 (interferon, beta 2)                                   | ENST00000420258 | -0,749068603 |
| A_23_P120845   | NM_005080       | XBP1         | X-box binding protein 1                                              | ENST00000415306 | -0,749579334 |
| A_33_P3309556  | NM_006504       | PTPRE        | protein tyrosine phosphatase, receptor type, E                       |                 | -0,749860405 |
| A_23_P120845   | NM_005080       | XBP1         | X-box binding protein 1                                              | ENST00000415306 | -0,750107684 |
| A_23_P86470    | NM_003956       | CH25H        | cholesterol 25-hydroxylase                                           | ENST00000371852 | -0,75065291  |
| A_21_P0000778  | NR_038357       | LOC100507331 | uncharacterized LOC100507331                                         | ENST00000456638 | -0,751294459 |
| A_23_P42746    | NM_000265       | NCF1         | neutrophil cytosolic factor 1                                        | ENST00000289473 | -0,751758776 |
| A_23_P120845   | NM_005080       | XBP1         | X-box binding protein 1                                              | ENST00000415306 | -0,752547591 |
| A_33_P3411145  | NM_001145191    | FAM200B      | family with sequence similarity 200, member B                        | ENST00000504137 | -0,75279952  |
| A_23_P120845   | NM_005080       | XBP1         | X-box binding protein 1                                              | ENST00000415306 | -0,753036559 |
| A_24_P11315    | NM_020190       | OLFML3       | olfactomedin-like 3                                                  | ENST00000393300 | -0,753103958 |
| A_23_P819      | NM_005101       | ISG15        | ISG15 ubiquitin-like modifier                                        | ENST00000379389 | -0,753302549 |
| A_24_P114249   | NM_004482       | GALNT3       | UDP-N-acetyl-alpha-D-galactosamine:polypeptide N-acetylgl            | ENST00000392701 | -0,75406106  |
| A_32_P183918   | NR_033851       | MGC39372     | serpin peptidase inhibitor, clade B (ovalbumin), member 9 pseudogene |                 | -0,75505495  |
| A_21_P0010978  | AF001893        | NEAT1        | nuclear paraspeckle assembly transcript 1 (non-protein coding)       |                 | -0,755935751 |
| A_23_P120845   | NM_005080       | XBP1         | X-box binding protein 1                                              | ENST00000415306 | -0,757094713 |
| A_23_P147025   | NM_004794       | RAB33A       | RAB33A, member RAS oncogene family                                   | ENST00000257017 | -0,757309909 |
| A_33_P3381513  | NM_014143       | CD274        | CD274 molecule                                                       | ENST00000492923 | -0,757832695 |
| A_24_P335305   | NM_006187       | OAS3         | 2'-5'-oligoadenylate synthetase 3, 100kDa                            | ENST00000323881 | -0,760327029 |
| A_23_P343398   | NM_001838       | CCR7         | chemokine (C-C motif) receptor 7                                     | ENST00000246657 | -0,760937729 |

|               |                |             |                                                                |                 |              |
|---------------|----------------|-------------|----------------------------------------------------------------|-----------------|--------------|
| A_33_P3332362 | NM_001207026   | POU2F2      | POU class 2 homeobox 2                                         | ENST00000342301 | -0,76190145  |
| A_23_P1691    | NM_002421      | MMP1        | matrix metalloproteinase 1 (interstitial collagenase)          | ENST00000315274 | -0,762216068 |
| A_23_P354591  | NM_033446      | FAM125B     | family with sequence similarity 125, member B                  | ENST00000361171 | -0,763379491 |
| A_23_P120845  | NM_005080      | XBP1        | X-box binding protein 1                                        | ENST00000415306 | -0,763692604 |
| A_33_P3705884 | AK094188       | LOC148189   | uncharacterized LOC148189                                      |                 | -0,764671837 |
| A_33_P3284508 | NM_001174104   | CD14        | CD14 molecule                                                  | ENST00000302014 | -0,765040604 |
| A_23_P2492    | NM_001734      | C1S         | complement component 1, s subcomponent                         | ENST00000360817 | -0,765262804 |
| A_21_P0005052 | TCONS_00012260 | XLOC_005811 |                                                                |                 | -0,765541056 |
| A_24_P389916  | NM_005512      | LRRC32      | leucine rich repeat containing 32                              | ENST00000404995 | -0,766470805 |
| A_23_P153320  | NM_000201      | ICAM1       | intercellular adhesion molecule 1                              | ENST00000264832 | -0,76701685  |
| A_33_P3734384 | AK097526       | LOC285957   | uncharacterized LOC285957                                      |                 | -0,767308912 |
| A_21_P0004231 | TCONS_00009878 | XLOC_004300 |                                                                |                 | -0,768819238 |
| A_24_P335620  | NM_003486      | SLC7A5      | solute carrier family 7 (amino acid transporter light chain, L | ENST00000261622 | -0,769709434 |
| A_23_P104438  | NM_032578      | MYPN        | myopalladin                                                    | ENST00000354393 | -0,770179138 |
| A_23_P104438  | NM_032578      | MYPN        | myopalladin                                                    | ENST00000354393 | -0,770666679 |
| A_24_P107317  | NM_004205      | USP2        | ubiquitin specific peptidase 2                                 | ENST00000260187 | -0,770785857 |
| A_23_P121106  | NM_003865      | HESX1       | HESX homeobox 1                                                | ENST00000295934 | -0,771051967 |
| A_23_P141802  | NM_001040147   | SERPINB7    | serpin peptidase inhibitor, clade B (ovalbumin), member 7      | ENST00000540675 | -0,771117389 |
| A_23_P153320  | NM_000201      | ICAM1       | intercellular adhesion molecule 1                              | ENST00000264832 | -0,772490779 |
| A_23_P153320  | NM_000201      | ICAM1       | intercellular adhesion molecule 1                              | ENST00000264832 | -0,773084356 |
| A_33_P3239185 | NM_001252065   | SYT7        | synaptotagmin VII                                              | ENST00000263846 | -0,773243534 |
| A_24_P97405   | NM_003965      | CCRL2       | chemokine (C-C motif) receptor-like 2                          | ENST00000400880 | -0,77354896  |
| A_24_P362540  | NM_003887      | ASAP2       | ArfGAP with SH3 domain, ankyrin repeat and PH domain 2         | ENST00000484590 | -0,775125443 |
| A_32_P53524   | NM_004822      | NTN1        | netrin 1                                                       | ENST00000173229 | -0,775236284 |
| A_23_P110212  | NM_001995      | ACSL1       | acyl-CoA synthetase long-chain family member 1                 | ENST00000281455 | -0,775244732 |
| A_23_P113393  | NM_017413      | APLN        | apelin                                                         | ENST00000307484 | -0,775300604 |
| A_33_P3296181 | NM_001001437   | CCL3L3      | chemokine (C-C motif) ligand 3-like 3                          | ENST00000394484 | -0,775571228 |
| A_23_P49448   | NM_024306      | FA2H        | fatty acid 2-hydroxylase                                       | ENST00000219368 | -0,775624429 |
| A_23_P104438  | NM_032578      | MYPN        | myopalladin                                                    | ENST00000354393 | -0,776825151 |

|               |                 |              |                                                                       |                 |              |
|---------------|-----------------|--------------|-----------------------------------------------------------------------|-----------------|--------------|
| A_32_P4626    | XR_108654       | LOC100505880 | uncharacterized LOC100505880                                          |                 | -0,777404875 |
| A_23_P110212  | NM_001995       | ACSL1        | acyl-CoA synthetase long-chain family member 1                        | ENST00000281455 | -0,779727572 |
| A_23_P308722  | NM_145038       | CCDC164      | coiled-coil domain containing 164                                     | ENST00000288710 | -0,780031566 |
| A_23_P29680   | NM_024046       | CAMKV        | CaM kinase-like vesicle-associated                                    | ENST00000477224 | -0,780114266 |
| A_23_P153320  | NM_000201       | ICAM1        | intercellular adhesion molecule 1                                     | ENST00000264832 | -0,780711636 |
| A_23_P55649   | NM_001462       | FPR2         | formyl peptide receptor 2                                             | ENST00000340023 | -0,780840892 |
| A_33_P3314356 | ENST00000315194 | PPM1K        | protein phosphatase, Mg <sup>2+</sup> /Mn <sup>2+</sup> dependent, 1K | ENST00000315194 | -0,781848152 |
| A_23_P1691    | NM_002421       | MMP1         | matrix metalloproteinase 1 (interstitial collagenase)                 | ENST00000315274 | -0,783146276 |
| A_23_P153320  | NM_000201       | ICAM1        | intercellular adhesion molecule 1                                     | ENST00000264832 | -0,783707016 |
| A_23_P419714  | NM_001018072    | BTBD11       | BTB (POZ) domain containing 11                                        | ENST00000280758 | -0,783880901 |
| A_23_P110212  | NM_001995       | ACSL1        | acyl-CoA synthetase long-chain family member 1                        | ENST00000281455 | -0,78475792  |
| A_23_P110196  | NM_016323       | HERC5        | hect domain and RLD 5                                                 | ENST00000502913 | -0,7850925   |
| A_23_P1691    | NM_002421       | MMP1         | matrix metalloproteinase 1 (interstitial collagenase)                 | ENST00000315274 | -0,785450716 |
| A_23_P126735  | NM_000572       | IL10         | interleukin 10                                                        | ENST00000423557 | -0,786213168 |
| A_33_P3225522 | NM_001032731    | OAS2         | 2'-5'-oligoadenylate synthetase 2, 69/71kDa                           | ENST00000449768 | -0,786835733 |
| A_33_P3610406 | NR_028501       | ECEL1P2      | endothelin converting enzyme-like 1, pseudogene 2                     | ENST00000461596 | -0,78690462  |
| A_23_P423331  | NM_032536       | NTNG2        | netrin G2                                                             | ENST00000360670 | -0,787776887 |
| A_23_P1691    | NM_002421       | MMP1         | matrix metalloproteinase 1 (interstitial collagenase)                 | ENST00000315274 | -0,789048918 |
| A_33_P3239347 | NM_006167       | NKX3-1       | NK3 homeobox 1                                                        | ENST00000380871 | -0,78961717  |
| A_23_P500130  | NM_153186       | KANK1        | KN motif and ankyrin repeat domains 1                                 | ENST00000382289 | -0,790571682 |
| A_24_P132383  | NM_175571       | GIMAP8       | GTPase, IMAP family member 8                                          | ENST00000307271 | -0,791027736 |
| A_23_P153320  | NM_000201       | ICAM1        | intercellular adhesion molecule 1                                     | ENST00000264832 | -0,791645908 |
| A_21_P0000571 | NR_028484       | C22orf45     | chromosome 22 open reading frame 45                                   | ENST00000543438 | -0,791876006 |
| A_23_P1691    | NM_002421       | MMP1         | matrix metalloproteinase 1 (interstitial collagenase)                 | ENST00000315274 | -0,792066245 |
| A_33_P3281695 | NM_001243133    | NLRP3        | NLR family, pyrin domain containing 3                                 | ENST00000391827 | -0,792097579 |
| A_23_P110212  | NM_001995       | ACSL1        | acyl-CoA synthetase long-chain family member 1                        | ENST00000281455 | -0,792946447 |
| A_23_P153320  | NM_000201       | ICAM1        | intercellular adhesion molecule 1                                     | ENST00000264832 | -0,792968596 |
| A_32_P116606  | NM_153234       | LIX1         | Lix1 homolog (chicken)                                                | ENST00000274382 | -0,793319828 |
| A_23_P153320  | NM_000201       | ICAM1        | intercellular adhesion molecule 1                                     | ENST00000264832 | -0,794188093 |

|                |                  |                |                                                       |                 |              |
|----------------|------------------|----------------|-------------------------------------------------------|-----------------|--------------|
| A_23_P301521   | NM_020848        | KIAA1462       | KIAA1462                                              | ENST00000375377 | -0,795451426 |
| A_23_P105465   | NM_004072        | CMKLR1         | chemokine-like receptor 1                             | ENST00000550402 | -0,795510449 |
| A_23_P215634   | NM_001013398     | IGFBP3         | insulin-like growth factor binding protein 3          | ENST00000438491 | -0,795844139 |
| A_23_P110212   | NM_001995        | ACSL1          | acyl-CoA synthetase long-chain family member 1        | ENST00000281455 | -0,796003488 |
| A_23_P215634   | NM_001013398     | IGFBP3         | insulin-like growth factor binding protein 3          | ENST00000438491 | -0,796698127 |
| A_23_P110212   | NM_001995        | ACSL1          | acyl-CoA synthetase long-chain family member 1        | ENST00000281455 | -0,796744299 |
| A_23_P110212   | NM_001995        | ACSL1          | acyl-CoA synthetase long-chain family member 1        | ENST00000281455 | -0,797116249 |
| A_19_P00326514 | THC2657073       | XLOC_I2_007928 |                                                       |                 | -0,797419498 |
| A_21_P0014444  | XR_109837        | LOC100507639   | uncharacterized LOC100507639                          |                 | -0,798078797 |
| A_21_P0011013  | THC2737662       | XLOC_I2_002729 |                                                       |                 | -0,798536346 |
| A_23_P17053    | NM_019618        | IL36G          | interleukin 36, gamma                                 | ENST00000259205 | -0,798728391 |
| A_23_P87879    | NM_001781        | CD69           | CD69 molecule                                         | ENST00000228434 | -0,800047495 |
| A_23_P110212   | NM_001995        | ACSL1          | acyl-CoA synthetase long-chain family member 1        | ENST00000281455 | -0,800623859 |
| A_23_P370682   | NM_138456        | BATF2          | basic leucine zipper transcription factor, ATF-like 2 | ENST00000527454 | -0,800642538 |
| A_23_P105794   | NM_033255        | EPSTI1         | epithelial stromal interaction 1 (breast)             | ENST00000476830 | -0,800758119 |
| A_33_P3362291  | AK001351         | FLJ10489       | uncharacterized protein FLJ10489                      | ENST00000503718 | -0,801026326 |
| A_23_P126735   | NM_000572        | IL10           | interleukin 10                                        | ENST00000423557 | -0,801817591 |
| A_23_P110212   | NM_001995        | ACSL1          | acyl-CoA synthetase long-chain family member 1        | ENST00000281455 | -0,80203917  |
| A_21_P0013370  | ENST00000439058  | XLOC_I2_013301 |                                                       | ENST00000439058 | -0,802499296 |
| A_23_P126735   | NM_000572        | IL10           | interleukin 10                                        | ENST00000423557 | -0,802539806 |
| A_23_P139146   | NM_031457        | MS4A8B         | membrane-spanning 4-domains, subfamily A, member 8B   | ENST00000300226 | -0,802933965 |
| A_21_P0013613  | TCONS_I2_0002916 | XLOC_I2_015090 |                                                       |                 | -0,803337069 |
| A_23_P153320   | NM_000201        | ICAM1          | intercellular adhesion molecule 1                     | ENST00000264832 | -0,803395317 |
| A_23_P110212   | NM_001995        | ACSL1          | acyl-CoA synthetase long-chain family member 1        | ENST00000281455 | -0,803825083 |
| A_24_P197964   | NM_014788        | TRIM14         | tripartite motif containing 14                        | ENST00000341469 | -0,805839501 |
| A_21_P0000893  | NR_040051        | LOC100506686   | uncharacterized LOC100506686                          |                 | -0,805901121 |
| A_33_P3225625  | NM_001003799     | TARP           | TCR gamma alternate reading frame protein             | ENST00000443402 | -0,806865407 |
| A_23_P126735   | NM_000572        | IL10           | interleukin 10                                        | ENST00000423557 | -0,806979098 |
| A_23_P150316   | NM_002426        | MMP12          | matrix metalloproteinase 12 (macrophage elastase)     |                 | -0,807132231 |



|               |                 |                |                                                                   |                 |              |
|---------------|-----------------|----------------|-------------------------------------------------------------------|-----------------|--------------|
| A_23_P1691    | NM_002421       | MMP1           | matrix metalloproteinase 1 (interstitial collagenase)             | ENST00000315274 | -0,808536853 |
| A_23_P87879   | NM_001781       | CD69           | CD69 molecule                                                     | ENST00000228434 | -0,808988598 |
| A_23_P121106  | NM_003865       | HESX1          | HESX homeobox 1                                                   | ENST00000295934 | -0,809462563 |
| A_23_P404494  | NM_002185       | IL7R           | interleukin 7 receptor                                            | ENST00000343305 | -0,809692835 |
| A_24_P414376  | NM_016531       | KLF3           | Kruppel-like factor 3 (basic)                                     | ENST00000261438 | -0,810257665 |
| A_23_P1691    | NM_002421       | MMP1           | matrix metalloproteinase 1 (interstitial collagenase)             | ENST00000315274 | -0,810361408 |
| A_23_P105794  | NM_033255       | EPSTI1         | epithelial stromal interaction 1 (breast)                         | ENST00000476830 | -0,811196213 |
| A_23_P1691    | NM_002421       | MMP1           | matrix metalloproteinase 1 (interstitial collagenase)             | ENST00000315274 | -0,811693183 |
| A_21_P0002866 | ENST00000484675 | XLOC_003190    |                                                                   | ENST00000484675 | -0,812559113 |
| A_21_P0013701 | AK095210        | XLOC_I2_014850 |                                                                   |                 | -0,812688695 |
| A_21_P0013056 | THC2730466      | XLOC_I2_012847 |                                                                   |                 | -0,812912468 |
| A_23_P105794  | NM_033255       | EPSTI1         | epithelial stromal interaction 1 (breast)                         | ENST00000476830 | -0,813802451 |
| A_23_P153320  | NM_000201       | ICAM1          | intercellular adhesion molecule 1                                 | ENST00000264832 | -0,81571254  |
| A_23_P118254  | NM_001451       | FOXF1          | forkhead box F1                                                   | ENST00000262426 | -0,815978016 |
| A_33_P3350583 | NM_138819       | FAM122C        | family with sequence similarity 122C                              | ENST00000370784 | -0,817848865 |
| A_33_P3315906 | NM_032611       | PTP4A3         | protein tyrosine phosphatase type IVA, member 3                   | ENST00000521578 | -0,819676098 |
| A_21_P0013808 | THC2666070      | XLOC_I2_015673 |                                                                   |                 | -0,819737562 |
| A_21_P0008156 | TCONS_00021991  | XLOC_010591    |                                                                   |                 | -0,82001395  |
| A_21_P0013372 | ENST00000439058 | XLOC_I2_013301 |                                                                   | ENST00000439058 | -0,820479874 |
| A_21_P0012425 | ENST00000415451 | XLOC_I2_010061 |                                                                   | ENST00000415451 | -0,82113132  |
| A_23_P42353   | NM_016135       | ETV7           | ets variant 7                                                     | ENST00000339796 | -0,822338176 |
| A_23_P110196  | NM_016323       | HERC5          | hect domain and RLD 5                                             | ENST00000502913 | -0,822715379 |
| A_33_P3829391 | BC030809        | LOC641510      | uncharacterized LOC641510                                         |                 | -0,82275564  |
| A_23_P105794  | NM_033255       | EPSTI1         | epithelial stromal interaction 1 (breast)                         | ENST00000476830 | -0,823172927 |
| A_23_P257971  | NM_001353       | AKR1C1         | aldo-keto reductase family 1, member C1 (dihydrodiol dehydratase) | ENST00000460124 | -0,823331127 |
| A_33_P3282641 | NR_033752       | LOC344887      | NmrA-like family domain containing 1 pseudogene                   | ENST00000416764 | -0,824533229 |
| A_33_P3606465 | NR_033754       | CBX3P2         | chromobox homolog 3 pseudogene 2                                  |                 | -0,825129053 |
| A_23_P118254  | NM_001451       | FOXF1          | forkhead box F1                                                   | ENST00000262426 | -0,825909682 |
| A_23_P89431   | NM_002982       | CCL2           | chemokine (C-C motif) ligand 2                                    | ENST00000225831 | -0,825961237 |

|               |                  |                |                                                       |                 |              |
|---------------|------------------|----------------|-------------------------------------------------------|-----------------|--------------|
| A_33_P3263890 | NM_006902        | PRRX1          | paired related homeobox 1                             | ENST00000239461 | -0,826551659 |
| A_23_P126735  | NM_000572        | IL10           | interleukin 10                                        | ENST00000423557 | -0,827472376 |
| A_24_P618401  | NR_034121        | LOC100131067   | uncharacterized LOC100131067                          | ENST00000501927 | -0,827938991 |
| A_21_P0005717 | TCONS_00014754   | XLOC_006838    |                                                       |                 | -0,831114391 |
| A_23_P126735  | NM_000572        | IL10           | interleukin 10                                        | ENST00000423557 | -0,831355335 |
| A_23_P105794  | NM_033255        | EPSTI1         | epithelial stromal interaction 1 (breast)             | ENST00000476830 | -0,831426437 |
| A_33_P3672756 | XR_112106        | LOC284561      | uncharacterized LOC284561                             |                 | -0,831469553 |
| A_23_P110196  | NM_016323        | HERC5          | hect domain and RLD 5                                 | ENST00000502913 | -0,832122843 |
| A_23_P27400   | NM_001523        | HAS1           | hyaluronan synthase 1                                 | ENST00000540069 | -0,832216556 |
| A_23_P118254  | NM_001451        | FOXF1          | forkhead box F1                                       | ENST00000262426 | -0,834173027 |
| A_33_P3390057 | NM_014220        | TM4SF1         | transmembrane 4 L six family member 1                 | ENST00000383054 | -0,835306219 |
| A_23_P209678  | NM_002664        | PLEK           | pleckstrin                                            | ENST00000234313 | -0,835759464 |
| A_23_P121106  | NM_003865        | HESX1          | HESX homeobox 1                                       | ENST00000295934 | -0,835818818 |
| A_32_P54553   | ENST00000454608  | USP41          | ubiquitin specific peptidase 41                       | ENST00000454608 | -0,836448748 |
| A_33_P3258046 | NM_170685        | TAC4           | tachykinin 4 (hemokinin)                              | ENST00000334568 | -0,837398353 |
| A_23_P105794  | NM_033255        | EPSTI1         | epithelial stromal interaction 1 (breast)             | ENST00000476830 | -0,837590058 |
| A_23_P126735  | NM_000572        | IL10           | interleukin 10                                        | ENST00000423557 | -0,838354315 |
| A_23_P13094   | NM_002425        | MMP10          | matrix metalloproteinase 10 (stromelysin 2)           | ENST00000279441 | -0,838441981 |
| A_23_P105794  | NM_033255        | EPSTI1         | epithelial stromal interaction 1 (breast)             | ENST00000476830 | -0,838883255 |
| A_23_P118254  | NM_001451        | FOXF1          | forkhead box F1                                       | ENST00000262426 | -0,839847903 |
| A_23_P89431   | NM_002982        | CCL2           | chemokine (C-C motif) ligand 2                        | ENST00000225831 | -0,840234387 |
| A_33_P3240532 | NM_015149        | RGL1           | ral guanine nucleotide dissociation stimulator-like 1 | ENST00000367531 | -0,84068394  |
| A_23_P10458   | NM_018280        | C22orf26       | chromosome 22 open reading frame 26                   | ENST00000333761 | -0,841485917 |
| A_21_P0013057 | TCONS_I2_0002457 | XLOC_I2_012847 |                                                       |                 | -0,841998597 |
| A_23_P89431   | NM_002982        | CCL2           | chemokine (C-C motif) ligand 2                        | ENST00000225831 | -0,842390808 |
| A_23_P87879   | NM_001781        | CD69           | CD69 molecule                                         | ENST00000228434 | -0,84250482  |
| A_23_P126735  | NM_000572        | IL10           | interleukin 10                                        | ENST00000423557 | -0,84270286  |
| A_21_P0010536 | NM_018284        | GBP3           | guanylate binding protein 3                           | ENST00000461384 | -0,845141167 |
| A_23_P89431   | NM_002982        | CCL2           | chemokine (C-C motif) ligand 2                        | ENST00000225831 | -0,846139949 |

|               |                                 |             |                                                           |                 |              |
|---------------|---------------------------------|-------------|-----------------------------------------------------------|-----------------|--------------|
| A_23_P105794  | NM_033255                       | EPSTI1      | epithelial stromal interaction 1 (breast)                 | ENST00000476830 | -0,84647312  |
| A_23_P376488  | NM_000594                       | TNF         | tumor necrosis factor                                     | ENST00000376122 | -0,84664527  |
| A_23_P110196  | NM_016323                       | HERC5       | hect domain and RLD 5                                     | ENST00000502913 | -0,847495694 |
| A_21_P0012418 | TCONS_I2_0001904(XLOC_I2_010029 |             |                                                           |                 | -0,848039613 |
| A_32_P526255  | NM_001145717                    | PNPLA1      | patatin-like phospholipase domain containing 1            | ENST00000457797 | -0,848169669 |
| A_24_P250922  | NM_000963                       | PTGS2       | prostaglandin-endoperoxide synthase 2 (prostaglandin G/H  | ENST00000490885 | -0,848578974 |
| A_33_P3354607 | NM_002984                       | CCL4        | chemokine (C-C motif) ligand 4                            | ENST00000250151 | -0,851241685 |
| A_23_P121106  | NM_003865                       | HESX1       | HESX homeobox 1                                           | ENST00000295934 | -0,851687231 |
| A_24_P416997  | NM_145641                       | APOL3       | apolipoprotein L, 3                                       | ENST00000397287 | -0,851800733 |
| A_23_P105794  | NM_033255                       | EPSTI1      | epithelial stromal interaction 1 (breast)                 | ENST00000476830 | -0,85204437  |
| A_23_P89431   | NM_002982                       | CCL2        | chemokine (C-C motif) ligand 2                            | ENST00000225831 | -0,852539128 |
| A_24_P33895   | NM_001040619                    | ATF3        | activating transcription factor 3                         | ENST00000366983 | -0,853007216 |
| A_24_P250922  | NM_000963                       | PTGS2       | prostaglandin-endoperoxide synthase 2 (prostaglandin G/H  | ENST00000490885 | -0,85346112  |
| A_23_P89431   | NM_002982                       | CCL2        | chemokine (C-C motif) ligand 2                            | ENST00000225831 | -0,853718191 |
| A_23_P320113  | NM_080725                       | SRXN1       | sulfiredoxin 1                                            | ENST00000427916 | -0,855170905 |
| A_24_P245379  | NM_002575                       | SERPINB2    | serpin peptidase inhibitor, clade B (ovalbumin), member 2 | ENST00000457692 | -0,855301248 |
| A_23_P89431   | NM_002982                       | CCL2        | chemokine (C-C motif) ligand 2                            | ENST00000225831 | -0,855364596 |
| A_23_P105794  | NM_033255                       | EPSTI1      | epithelial stromal interaction 1 (breast)                 | ENST00000476830 | -0,855463577 |
| A_23_P118254  | NM_001451                       | FOXF1       | forkhead box F1                                           | ENST00000262426 | -0,85590941  |
| A_23_P89431   | NM_002982                       | CCL2        | chemokine (C-C motif) ligand 2                            | ENST00000225831 | -0,855989595 |
| A_23_P89431   | NM_002982                       | CCL2        | chemokine (C-C motif) ligand 2                            | ENST00000225831 | -0,857580252 |
| A_23_P105465  | NM_004072                       | CMKLR1      | chemokine-like receptor 1                                 | ENST00000550402 | -0,85838524  |
| A_21_P0001164 | ENST00000415166                 | XLOC_000955 |                                                           | ENST00000415166 | -0,858397329 |
| A_23_P126735  | NM_000572                       | IL10        | interleukin 10                                            | ENST00000423557 | -0,858685574 |
| A_23_P36397   | NM_000785                       | CYP27B1     | cytochrome P450, family 27, subfamily B, polypeptide 1    | ENST00000228606 | -0,858932664 |
| A_24_P305570  | NM_018993                       | RIN2        | Ras and Rab interactor 2                                  | ENST00000255006 | -0,859077269 |
| A_24_P250922  | NM_000963                       | PTGS2       | prostaglandin-endoperoxide synthase 2 (prostaglandin G/H  | ENST00000490885 | -0,859785133 |
| A_23_P89431   | NM_002982                       | CCL2        | chemokine (C-C motif) ligand 2                            | ENST00000225831 | -0,860204494 |
| A_23_P110196  | NM_016323                       | HERC5       | hect domain and RLD 5                                     | ENST00000502913 | -0,861016515 |

|               |                 |                |                                                           |                 |              |
|---------------|-----------------|----------------|-----------------------------------------------------------|-----------------|--------------|
| A_23_P125680  | NM_017938       | FAM70A         | family with sequence similarity 70, member A              | ENST00000440464 | -0,862695593 |
| A_24_P250922  | NM_000963       | PTGS2          | prostaglandin-endoperoxide synthase 2 (prostaglandin G/H  | ENST00000490885 | -0,863383989 |
| A_23_P110196  | NM_016323       | HERC5          | hect domain and RLD 5                                     | ENST00000502913 | -0,864398881 |
| A_24_P250922  | NM_000963       | PTGS2          | prostaglandin-endoperoxide synthase 2 (prostaglandin G/H  | ENST00000490885 | -0,865041541 |
| A_23_P149545  | NM_003528       | HIST2H2BE      | histone cluster 2, H2be                                   | ENST00000369155 | -0,866198395 |
| A_24_P354724  | NM_054114       | TAGAP          | T-cell activation RhoGTPase activating protein            | ENST00000326965 | -0,866538953 |
| A_24_P250922  | NM_000963       | PTGS2          | prostaglandin-endoperoxide synthase 2 (prostaglandin G/H  | ENST00000490885 | -0,866828755 |
| A_23_P64611   | NM_176798       | P2RY6          | pyrimidineric receptor P2Y, G-protein coupled, 6          | ENST00000538328 | -0,866878357 |
| A_33_P3295278 | NM_001136508    | C1orf185       | chromosome 1 open reading frame 185                       | ENST00000371759 | -0,867333509 |
| A_21_P0004268 | TCONS_00010003  | XLOC_004439    |                                                           |                 | -0,867735521 |
| A_23_P123853  | NM_006274       | CCL19          | chemokine (C-C motif) ligand 19                           | ENST00000485502 | -0,867934709 |
| A_23_P118254  | NM_001451       | FOXF1          | forkhead box F1                                           | ENST00000262426 | -0,868197285 |
| A_23_P74609   | NM_015714       | G0S2           | G0/G1switch 2                                             | ENST00000367029 | -0,868798626 |
| A_32_P24585   | NM_001017995    | SH3PXD2B       | SH3 and PX domains 2B                                     | ENST00000311601 | -0,868834117 |
| A_32_P54503   | NR_024451       | LOC100134229   | uncharacterized LOC100134229                              |                 | -0,869584797 |
| A_33_P3352827 | NM_003037       | SLAMF1         | signaling lymphocytic activation molecule family member 1 | ENST00000355199 | -0,871911112 |
| A_24_P250922  | NM_000963       | PTGS2          | prostaglandin-endoperoxide synthase 2 (prostaglandin G/H  | ENST00000490885 | -0,872931195 |
| A_23_P336612  | NM_173528       | C15orf26       | chromosome 15 open reading frame 26                       | ENST00000286732 | -0,87317552  |
| A_23_P110196  | NM_016323       | HERC5          | hect domain and RLD 5                                     | ENST00000502913 | -0,873402962 |
| A_23_P121106  | NM_003865       | HESX1          | HESX homeobox 1                                           | ENST00000295934 | -0,877148895 |
| A_24_P250922  | NM_000963       | PTGS2          | prostaglandin-endoperoxide synthase 2 (prostaglandin G/H  | ENST00000490885 | -0,877260458 |
| A_23_P110196  | NM_016323       | HERC5          | hect domain and RLD 5                                     | ENST00000502913 | -0,877617335 |
| A_33_P3224803 | NM_000265       | NCF1           | neutrophil cytosolic factor 1                             | ENST00000438106 | -0,877994426 |
| A_23_P126735  | NM_000572       | IL10           | interleukin 10                                            | ENST00000423557 | -0,881047519 |
| A_21_P0001988 | ENST00000433724 | XLOC_001932    |                                                           | ENST00000433724 | -0,881489088 |
| A_24_P250922  | NM_000963       | PTGS2          | prostaglandin-endoperoxide synthase 2 (prostaglandin G/H  | ENST00000490885 | -0,884778133 |
| A_21_P0013181 | ENST00000439058 | XLOC_I2_013301 |                                                           | ENST00000439058 | -0,884903731 |
| A_23_P151294  | NM_000619       | IFNG           | interferon, gamma                                         | ENST00000229135 | -0,886329377 |
| A_24_P295010  | NM_004155       | SERPINB9       | serpin peptidase inhibitor, clade B (ovalbumin), member 9 | ENST00000380698 | -0,886564268 |

|               |                 |                |                                                               |                 |              |
|---------------|-----------------|----------------|---------------------------------------------------------------|-----------------|--------------|
| A_23_P62890   | NM_002053       | GBP1           | guanylate binding protein 1, interferon-inducible             | ENST00000370473 | -0,88895366  |
| A_23_P121106  | NM_003865       | HESX1          | HESX homeobox 1                                               | ENST00000295934 | -0,889595566 |
| A_33_P3298810 | NM_005304       | FFAR3          | free fatty acid receptor 3                                    | ENST00000454971 | -0,889689404 |
| A_24_P250922  | NM_000963       | PTGS2          | prostaglandin-endoperoxide synthase 2 (prostaglandin G/H      | ENST00000490885 | -0,889775252 |
| A_24_P788878  | NM_001007595    | C2CD4B         | C2 calcium-dependent domain containing 4B                     | ENST00000380392 | -0,889814132 |
| A_32_P9543    | NM_145699       | APOBEC3A       | apolipoprotein B mRNA editing enzyme, catalytic polypepti     | ENST00000402255 | -0,891885487 |
| A_21_P0006780 | ENST00000455465 | XLOC_008902    |                                                               | ENST00000455465 | -0,893526724 |
| A_23_P344568  | NM_145019       | FAM124A        | family with sequence similarity 124A                          | ENST00000280057 | -0,895198328 |
| A_23_P110196  | NM_016323       | HERC5          | hect domain and RLD 5                                         | ENST00000502913 | -0,895448699 |
| A_23_P77918   | NM_006041       | HS3ST3B1       | heparan sulfate (glucosamine) 3-O-sulfotransferase 3B1        | ENST00000360954 | -0,897400211 |
| A_23_P110196  | NM_016323       | HERC5          | hect domain and RLD 5                                         | ENST00000502913 | -0,898069842 |
| A_23_P121106  | NM_003865       | HESX1          | HESX homeobox 1                                               | ENST00000295934 | -0,901795962 |
| A_21_P0012521 | NR_033752       | LOC344887      | NmrA-like family domain containing 1 pseudogene               | ENST00000416764 | -0,90483297  |
| A_21_P0010727 | ENST00000453173 | XLOC_I2_000423 |                                                               | ENST00000453173 | -0,90601623  |
| A_23_P17663   | NM_002462       | MX1            | myxovirus (influenza virus) resistance 1, interferon-inducibl | ENST00000455164 | -0,908984967 |
| A_23_P34915   | NM_001040619    | ATF3           | activating transcription factor 3                             | ENST00000366987 | -0,909397132 |
| A_21_P0005649 | TCONS_00014594  | XLOC_006699    |                                                               |                 | -0,911741584 |
| A_33_P3236661 | BC150296        | PCDH9          | protocadherin 9                                               |                 | -0,914279958 |
| A_24_P356916  | NM_001011554    | SLC13A3        | solute carrier family 13 (sodium-dependent dicarboxylate tr   | ENST00000279027 | -0,918628464 |
| A_23_P105465  | NM_004072       | CMKLR1         | chemokine-like receptor 1                                     | ENST00000550402 | -0,919501949 |
| A_23_P406782  | NM_182983       | HPN            | hepsin                                                        | ENST00000541345 | -0,920875404 |
| A_24_P104407  | NM_145728       | SYNM           | synemin, intermediate filament protein                        | ENST00000336292 | -0,923402377 |
| A_23_P259141  | NM_030776       | ZBP1           | Z-DNA binding protein 1                                       | ENST00000461547 | -0,924603677 |
| A_23_P6381    | NM_002430       | MN1            | meningioma (disrupted in balanced translocation) 1            | ENST00000302326 | -0,925085045 |
| A_33_P3415032 | NM_002232       | KCNA3          | potassium voltage-gated channel, shaker-related subfamily,    | ENST00000369769 | -0,92509038  |
| A_23_P114008  | NM_024795       | TM4SF20        | transmembrane 4 L six family member 20                        | ENST00000304568 | -0,927443415 |
| A_23_P46482   | NM_018724       | IL20           | interleukin 20                                                | ENST00000367096 | -0,929125189 |
| A_23_P121106  | NM_003865       | HESX1          | HESX homeobox 1                                               | ENST00000295934 | -0,929244466 |
| A_23_P121253  | NM_003810       | TNFSF10        | tumor necrosis factor (ligand) superfamily, member 10         | ENST00000241261 | -0,929769774 |



|                |                 |             |                                                       |                 |              |
|----------------|-----------------|-------------|-------------------------------------------------------|-----------------|--------------|
| A_23_P132159   | NM_017414       | USP18       | ubiquitin specific peptidase 18                       | ENST00000215794 | -0,934028846 |
| A_23_P82868    | NM_000930       | PLAT        | plasminogen activator, tissue                         | ENST00000352041 | -0,934920705 |
| A_23_P122924   | NM_002192       | INHBA       | inhibin, beta A                                       | ENST00000442711 | -0,93697172  |
| A_23_P122924   | NM_002192       | INHBA       | inhibin, beta A                                       | ENST00000442711 | -0,937638935 |
| A_23_P122924   | NM_002192       | INHBA       | inhibin, beta A                                       | ENST00000442711 | -0,938523877 |
| A_23_P122924   | NM_002192       | INHBA       | inhibin, beta A                                       | ENST00000442711 | -0,938767956 |
| A_23_P105465   | NM_004072       | CMKLR1      | chemokine-like receptor 1                             | ENST00000550402 | -0,939016765 |
| A_32_P44394    | NM_004833       | AIM2        | absent in melanoma 2                                  | ENST00000368130 | -0,940122645 |
| A_23_P122924   | NM_002192       | INHBA       | inhibin, beta A                                       | ENST00000442711 | -0,940208872 |
| A_19_P00315518 | ENST00000427157 | XLOC_005810 |                                                       | ENST00000427157 | -0,94463968  |
| A_23_P206920   | NM_001040114    | MYH11       | myosin, heavy chain 11, smooth muscle                 | ENST00000396324 | -0,944964205 |
| A_23_P207564   | NM_002984       | CCL4        | chemokine (C-C motif) ligand 4                        | ENST00000250151 | -0,945197134 |
| A_33_P3423941  | NM_003641       | IFITM1      | interferon induced transmembrane protein 1 (9-27)     | ENST00000408968 | -0,94555997  |
| A_23_P60146    | NM_006207       | PDGFRL      | platelet-derived growth factor receptor-like          | ENST00000251630 | -0,946263677 |
| A_23_P122924   | NM_002192       | INHBA       | inhibin, beta A                                       | ENST00000442711 | -0,947867217 |
| A_23_P122924   | NM_002192       | INHBA       | inhibin, beta A                                       | ENST00000442711 | -0,947924038 |
| A_32_P83845    | NM_001040708    | HEY1        | hairy/enhancer-of-split related with YRPW motif 1     | ENST00000337919 | -0,950627849 |
| A_33_P3393766  | NM_001130677    | C17orf96    | chromosome 17 open reading frame 96                   | ENST00000325814 | -0,951434917 |
| A_23_P121253   | NM_003810       | TNFSF10     | tumor necrosis factor (ligand) superfamily, member 10 | ENST00000241261 | -0,95396969  |
| A_23_P214821   | NM_001955       | EDN1        | endothelin 1                                          | ENST00000379375 | -0,954008718 |
| A_24_P592012   | NM_025224       | ZBTB46      | zinc finger and BTB domain containing 46              | ENST00000245663 | -0,954071489 |
| A_23_P214821   | NM_001955       | EDN1        | endothelin 1                                          | ENST00000379375 | -0,954737893 |
| A_33_P3225512  | NM_002535       | OAS2        | 2'-5'-oligoadenylate synthetase 2, 69/71kDa           | ENST00000392583 | -0,956735797 |
| A_23_P334664   | NM_033247       | PML         | promyelocytic leukemia                                | ENST00000395132 | -0,957737259 |
| A_24_P759477   | NM_002214       | ITGB8       | integrin, beta 8                                      |                 | -0,959873748 |
| A_23_P71037    | NM_000600       | IL6         | interleukin 6 (interferon, beta 2)                    | ENST00000485300 | -0,959995294 |
| A_23_P122924   | NM_002192       | INHBA       | inhibin, beta A                                       | ENST00000442711 | -0,962947009 |
| A_33_P3352467  | NM_001050       | SSTR2       | somatostatin receptor 2                               | ENST00000357585 | -0,962955726 |
| A_23_P105465   | NM_004072       | CMKLR1      | chemokine-like receptor 1                             | ENST00000550402 | -0,96343931  |

|               |                 |              |                                                       |                 |              |
|---------------|-----------------|--------------|-------------------------------------------------------|-----------------|--------------|
| A_23_P105465  | NM_004072       | CMKLR1       | chemokine-like receptor 1                             | ENST00000550402 | -0,964491073 |
| A_23_P122924  | NM_002192       | INHBA        | inhibin, beta A                                       | ENST00000442711 | -0,966082315 |
| A_23_P152838  | NM_002985       | CCL5         | chemokine (C-C motif) ligand 5                        | ENST00000463941 | -0,96781747  |
| A_23_P105465  | NM_004072       | CMKLR1       | chemokine-like receptor 1                             | ENST00000550402 | -0,968253566 |
| A_23_P105465  | NM_004072       | CMKLR1       | chemokine-like receptor 1                             | ENST00000550402 | -0,969139806 |
| A_23_P122924  | NM_002192       | INHBA        | inhibin, beta A                                       | ENST00000442711 | -0,970718282 |
| A_23_P121253  | NM_003810       | TNFSF10      | tumor necrosis factor (ligand) superfamily, member 10 | ENST00000241261 | -0,970773348 |
| A_23_P105465  | NM_004072       | CMKLR1       | chemokine-like receptor 1                             | ENST00000550402 | -0,971838133 |
| A_23_P33326   | NM_000679       | ADRA1B       | adrenergic, alpha-1B-, receptor                       |                 | -0,973221665 |
| A_33_P3367301 | NM_152219       | GJD3         | gap junction protein, delta 3, 31.9kDa                |                 | -0,976472307 |
| A_23_P203540  | NM_012153       | EHF          | ets homologous factor                                 | ENST00000257831 | -0,977444619 |
| A_21_P0002510 | TCONS_00004464  | XLOC_002342  |                                                       |                 | -0,977996581 |
| A_23_P121253  | NM_003810       | TNFSF10      | tumor necrosis factor (ligand) superfamily, member 10 | ENST00000241261 | -0,978349726 |
| A_23_P121253  | NM_003810       | TNFSF10      | tumor necrosis factor (ligand) superfamily, member 10 | ENST00000241261 | -0,979874744 |
| A_23_P82868   | NM_000930       | PLAT         | plasminogen activator, tissue                         | ENST00000352041 | -0,980887969 |
| A_24_P70183   | NM_001040113    | MYH11        | myosin, heavy chain 11, smooth muscle                 | ENST00000452625 | -0,981969733 |
| A_24_P303091  | NM_001565       | CXCL10       | chemokine (C-X-C motif) ligand 10                     | ENST00000306602 | -0,982201454 |
| A_23_P215634  | NM_001013398    | IGFBP3       | insulin-like growth factor binding protein 3          | ENST00000438491 | -0,982901238 |
| A_23_P121253  | NM_003810       | TNFSF10      | tumor necrosis factor (ligand) superfamily, member 10 | ENST00000241261 | -0,983330898 |
| A_23_P6263    | NM_002463       | MX2          | myxovirus (influenza virus) resistance 2 (mouse)      | ENST00000330714 | -0,986218062 |
| A_21_P0004779 | ENST00000417932 | XLOC_005851  |                                                       | ENST00000417932 | -0,987684003 |
| A_23_P210690  | NM_021158       | TRIB3        | tribbles homolog 3 (Drosophila)                       | ENST00000217233 | -0,988177207 |
| A_24_P766716  | NM_001142343    | CMKLR1       | chemokine-like receptor 1                             | ENST00000312143 | -0,990423707 |
| A_23_P29773   | NM_014398       | LAMP3        | lysosomal-associated membrane protein 3               | ENST00000265598 | -0,99059467  |
| A_23_P121253  | NM_003810       | TNFSF10      | tumor necrosis factor (ligand) superfamily, member 10 | ENST00000241261 | -0,991453989 |
| A_23_P121253  | NM_003810       | TNFSF10      | tumor necrosis factor (ligand) superfamily, member 10 | ENST00000241261 | -0,992405473 |
| A_23_P105465  | NM_004072       | CMKLR1       | chemokine-like receptor 1                             | ENST00000550402 | -0,995711847 |
| A_21_P0014632 | XR_110833       | LOC100505987 | uncharacterized LOC100505987                          |                 | -0,996136479 |
| A_23_P121253  | NM_003810       | TNFSF10      | tumor necrosis factor (ligand) superfamily, member 10 | ENST00000241261 | -0,998742637 |

|                |                 |              |                                                        |                 |              |
|----------------|-----------------|--------------|--------------------------------------------------------|-----------------|--------------|
| A_23_P121106   | NM_003865       | HESX1        | HESX homeobox 1                                        | ENST00000295934 | -0,999669623 |
| A_23_P214821   | NM_001955       | EDN1         | endothelin 1                                           | ENST00000379375 | -1,003024937 |
| A_23_P94030    | NM_002291       | LAMB1        | laminin, beta 1                                        | ENST00000222399 | -1,003036641 |
| A_23_P121253   | NM_003810       | TNFSF10      | tumor necrosis factor (ligand) superfamily, member 10  | ENST00000241261 | -1,004704764 |
| A_23_P132057   | NR_024027       | LINC00158    | long intergenic non-protein coding RNA 158             |                 | -1,012853653 |
| A_21_P0001003  | ENST00000420156 | XLOC_000352  |                                                        | ENST00000420156 | -1,016491146 |
| A_24_P23625    | ENST00000360954 | HS3ST3B1     | heparan sulfate (glucosamine) 3-O-sulfotransferase 3B1 | ENST00000360954 | -1,019210338 |
| A_23_P214821   | NM_001955       | EDN1         | endothelin 1                                           | ENST00000379375 | -1,019711311 |
| A_19_P00319917 | NR_038956       | LOC100506714 | uncharacterized LOC100506714                           |                 | -1,025288527 |
| A_24_P784765   | NM_203330       | CD59         | CD59 molecule, complement regulatory protein           |                 | -1,025750792 |
| A_19_P00320881 | NR_040025       | LOC100505474 | uncharacterized LOC100505474                           |                 | -1,025909662 |
| A_23_P337262   | NM_153000       | APCDD1       | adenomatosis polyposis coli down-regulated 1           | ENST00000423585 | -1,028058624 |
| A_33_P3284933  | NM_145659       | IL27         | interleukin 27                                         | ENST00000356897 | -1,033311261 |
| A_23_P82868    | NM_000930       | PLAT         | plasminogen activator, tissue                          | ENST00000352041 | -1,034769117 |
| A_23_P214821   | NM_001955       | EDN1         | endothelin 1                                           | ENST00000379375 | -1,036574486 |
| A_23_P214821   | NM_001955       | EDN1         | endothelin 1                                           | ENST00000379375 | -1,038649613 |
| A_23_P156687   | NM_001710       | CFB          | complement factor B                                    | ENST00000546515 | -1,039844462 |
| A_33_P3324004  | NM_032965       | CCL15        | chemokine (C-C motif) ligand 15                        | ENST00000354059 | -1,042250029 |
| A_24_P12690    | NM_194294       | IDO2         | indoleamine 2,3-dioxygenase 2                          | ENST00000343295 | -1,043036744 |
| A_23_P214821   | NM_001955       | EDN1         | endothelin 1                                           | ENST00000379375 | -1,044711702 |
| A_33_P3226810  | NM_003810       | TNFSF10      | tumor necrosis factor (ligand) superfamily, member 10  | ENST00000241261 | -1,045781172 |
| A_23_P393620   | NM_006528       | TFPI2        | tissue factor pathway inhibitor 2                      | ENST00000222543 | -1,046708558 |
| A_23_P82868    | NM_000930       | PLAT         | plasminogen activator, tissue                          | ENST00000352041 | -1,047893103 |
| A_33_P3295328  | NM_001007033    | CLEC6A       | C-type lectin domain family 6, member A                | ENST00000382073 | -1,048642486 |
| A_33_P3381671  | BC016366        | LOC731424    | uncharacterized LOC731424                              |                 | -1,048807048 |
| A_32_P74409    | NM_001145033    | C11orf96     | chromosome 11 open reading frame 96                    | ENST00000528572 | -1,053933567 |
| A_33_P3258346  | NM_017523       | XAF1         | XIAP associated factor 1                               | ENST00000361842 | -1,056949406 |
| A_23_P214821   | NM_001955       | EDN1         | endothelin 1                                           | ENST00000379375 | -1,058152992 |
| A_21_P0014592  | XR_110434       | LOC100507575 | uncharacterized LOC100507575                           |                 | -1,063201916 |

|               |                                 |          |                                                             |                 |              |
|---------------|---------------------------------|----------|-------------------------------------------------------------|-----------------|--------------|
| A_23_P214821  | NM_001955                       | EDN1     | endothelin 1                                                | ENST00000379375 | -1,064818691 |
| A_23_P82868   | NM_000930                       | PLAT     | plasminogen activator, tissue                               | ENST00000352041 | -1,066170257 |
| A_21_P0010537 | TCONS_I2_0000039(XLOC_I2_000297 |          |                                                             |                 | -1,0691161   |
| A_23_P118254  | NM_001451                       | FOXF1    | forkhead box F1                                             | ENST00000262426 | -1,073196634 |
| A_33_P3283824 | NM_001135147                    | SLC39A8  | solute carrier family 39 (zinc transporter), member 8       | ENST00000424970 | -1,07788998  |
| A_23_P62647   | NM_003037                       | SLAMF1   | signaling lymphocytic activation molecule family member 1   | ENST00000392208 | -1,078343361 |
| A_23_P82868   | NM_000930                       | PLAT     | plasminogen activator, tissue                               | ENST00000352041 | -1,080220921 |
| A_23_P82868   | NM_000930                       | PLAT     | plasminogen activator, tissue                               | ENST00000352041 | -1,08514515  |
| A_23_P87879   | NM_001781                       | CD69     | CD69 molecule                                               | ENST00000228434 | -1,085456456 |
| A_23_P82868   | NM_000930                       | PLAT     | plasminogen activator, tissue                               | ENST00000352041 | -1,085476042 |
| A_23_P76078   | NM_016584                       | IL23A    | interleukin 23, alpha subunit p19                           | ENST00000228534 | -1,090908605 |
| A_21_P0012192 | TCONS_I2_0001717(XLOC_I2_009172 |          |                                                             |                 | -1,091729092 |
| A_24_P411186  | NM_022893                       | BCL11A   | B-cell CLL/lymphoma 11A (zinc finger protein)               | ENST00000335712 | -1,10146855  |
| A_23_P121106  | NM_003865                       | HESX1    | HESX homeobox 1                                             | ENST00000295934 | -1,101973335 |
| A_23_P82868   | NM_000930                       | PLAT     | plasminogen activator, tissue                               | ENST00000352041 | -1,103415985 |
| A_23_P127288  | NM_000417                       | IL2RA    | interleukin 2 receptor, alpha                               | ENST00000379954 | -1,107987699 |
| A_33_P3293446 | NM_020848                       | KIAA1462 | KIAA1462                                                    | ENST00000375377 | -1,10952321  |
| A_23_P214821  | NM_001955                       | EDN1     | endothelin 1                                                | ENST00000379375 | -1,121190098 |
| A_23_P112026  | NM_002164                       | IDO1     | indoleamine 2,3-dioxygenase 1                               | ENST00000523779 | -1,123435675 |
| A_23_P112026  | NM_002164                       | IDO1     | indoleamine 2,3-dioxygenase 1                               | ENST00000523779 | -1,12825002  |
| A_23_P77043   | NM_024764                       | CATSPERB | cation channel, sperm-associated, beta                      | ENST00000256343 | -1,132885622 |
| A_23_P139704  | NM_001946                       | DUSP6    | dual specificity phosphatase 6                              | ENST00000279488 | -1,141800671 |
| A_23_P112026  | NM_002164                       | IDO1     | indoleamine 2,3-dioxygenase 1                               | ENST00000523779 | -1,146569858 |
| A_23_P52266   | NM_001548                       | IFIT1    | interferon-induced protein with tetratricopeptide repeats 1 | ENST00000546318 | -1,147627968 |
| A_33_P3418170 | NM_014314                       | DDX58    | DEAD (Asp-Glu-Ala-Asp) box polypeptide 58                   | ENST00000379882 | -1,149878157 |
| A_23_P112026  | NM_002164                       | IDO1     | indoleamine 2,3-dioxygenase 1                               | ENST00000523779 | -1,150595887 |
| A_23_P112026  | NM_002164                       | IDO1     | indoleamine 2,3-dioxygenase 1                               | ENST00000523779 | -1,153534932 |
| A_23_P82868   | NM_000930                       | PLAT     | plasminogen activator, tissue                               | ENST00000352041 | -1,154263288 |
| A_23_P112026  | NM_002164                       | IDO1     | indoleamine 2,3-dioxygenase 1                               | ENST00000523779 | -1,155327344 |

|               |              |           |                                                             |                 |              |
|---------------|--------------|-----------|-------------------------------------------------------------|-----------------|--------------|
| A_23_P112026  | NM_002164    | IDO1      | indoleamine 2,3-dioxygenase 1                               | ENST00000523779 | -1,158036734 |
| A_24_P230563  | NM_000417    | IL2RA     | interleukin 2 receptor, alpha                               | ENST00000447847 | -1,159062205 |
| A_23_P49759   | NM_002981    | CCL1      | chemokine (C-C motif) ligand 1                              | ENST00000225842 | -1,159158493 |
| A_24_P557479  | NM_017523    | XAF1      | XIAP associated factor 1                                    | ENST00000361842 | -1,16064236  |
| A_23_P79015   | NM_199037    | SCN1B     | sodium channel, voltage-gated, type I, beta                 | ENST00000415950 | -1,170702791 |
| A_24_P299685  | NM_198389    | PDPN      | podoplanin                                                  | ENST00000487038 | -1,17476378  |
| A_23_P204087  | NM_016817    | OAS2      | 2'-5'-oligoadenylate synthetase 2, 69/71kDa                 | ENST00000392583 | -1,179915372 |
| A_23_P112026  | NM_002164    | IDO1      | indoleamine 2,3-dioxygenase 1                               | ENST00000523779 | -1,180131311 |
| A_23_P112026  | NM_002164    | IDO1      | indoleamine 2,3-dioxygenase 1                               | ENST00000523779 | -1,184061889 |
| A_23_P17481   | NM_023068    | SIGLEC1   | sialic acid binding Ig-like lectin 1, sialoadhesin          | ENST00000202578 | -1,185079874 |
| A_33_P3313617 | NR_003133    | GBP1P1    | guanylate binding protein 1, interferon-inducible pseudogen | ENST00000513638 | -1,186626314 |
| A_21_P0000695 | NR_037867    | LOC731424 | uncharacterized LOC731424                                   |                 | -1,188671526 |
| A_23_P358917  | NM_000765    | CYP3A7    | cytochrome P450, family 3, subfamily A, polypeptide 7       | ENST00000336374 | -1,193785322 |
| A_33_P3281283 | NM_005226    | S1PR3     | sphingosine-1-phosphate receptor 3                          | ENST00000375846 | -1,205240759 |
| A_23_P72096   | NM_000575    | IL1A      | interleukin 1, alpha                                        | ENST00000263339 | -1,208775481 |
| A_33_P3228460 | NM_001136007 | FXYP3     | FXYP domain containing ion transport regulator 3            | ENST00000535103 | -1,212467546 |
| A_23_P72096   | NM_000575    | IL1A      | interleukin 1, alpha                                        | ENST00000263339 | -1,217690512 |
| A_23_P72096   | NM_000575    | IL1A      | interleukin 1, alpha                                        | ENST00000263339 | -1,218476065 |
| A_23_P72096   | NM_000575    | IL1A      | interleukin 1, alpha                                        | ENST00000263339 | -1,220555181 |
| A_23_P72096   | NM_000575    | IL1A      | interleukin 1, alpha                                        | ENST00000263339 | -1,229298206 |
| A_23_P139786  | NM_003733    | OASL      | 2'-5'-oligoadenylate synthetase-like                        | ENST00000257570 | -1,233515654 |
| A_23_P72096   | NM_000575    | IL1A      | interleukin 1, alpha                                        | ENST00000263339 | -1,238215714 |
| A_23_P112026  | NM_002164    | IDO1      | indoleamine 2,3-dioxygenase 1                               | ENST00000523779 | -1,238455504 |
| A_23_P72096   | NM_000575    | IL1A      | interleukin 1, alpha                                        | ENST00000263339 | -1,241069991 |
| A_23_P72096   | NM_000575    | IL1A      | interleukin 1, alpha                                        | ENST00000263339 | -1,245983655 |
| A_23_P386478  | NM_024873    | TNIP3     | TNFAIP3 interacting protein 3                               | ENST00000511909 | -1,245983816 |
| A_23_P72096   | NM_000575    | IL1A      | interleukin 1, alpha                                        | ENST00000263339 | -1,247549526 |
| A_23_P72096   | NM_000575    | IL1A      | interleukin 1, alpha                                        | ENST00000263339 | -1,250611668 |
| A_24_P304071  | NM_001547    | IFIT2     | interferon-induced protein with tetratricopeptide repeats 2 | ENST00000371826 | -1,254394204 |



|                |                 |               |                                                                  |                 |              |
|----------------|-----------------|---------------|------------------------------------------------------------------|-----------------|--------------|
| A_33_P3283611  | NM_001549       | IFIT3         | interferon-induced protein with tetratricopeptide repeats 3      | ENST00000543062 | -1,25727861  |
| A_33_P3401826  | NM_207315       | CMPK2         | cytidine monophosphate (UMP-CMP) kinase 2, mitochondri           | ENST00000478738 | -1,260722882 |
| A_23_P79518    | NM_000576       | IL1B          | interleukin 1, beta                                              | ENST00000263341 | -1,26151299  |
| A_23_P79518    | NM_000576       | IL1B          | interleukin 1, beta                                              | ENST00000263341 | -1,263151214 |
| A_23_P79518    | NM_000576       | IL1B          | interleukin 1, beta                                              | ENST00000263341 | -1,26488547  |
| A_23_P79518    | NM_000576       | IL1B          | interleukin 1, beta                                              | ENST00000263341 | -1,274526807 |
| A_23_P79518    | NM_000576       | IL1B          | interleukin 1, beta                                              | ENST00000263341 | -1,277352765 |
| A_33_P3329013  | NM_001050       | SSTR2         | somatostatin receptor 2                                          | ENST00000315332 | -1,278093017 |
| A_23_P79518    | NM_000576       | IL1B          | interleukin 1, beta                                              | ENST00000263341 | -1,281933861 |
| A_23_P79518    | NM_000576       | IL1B          | interleukin 1, beta                                              | ENST00000263341 | -1,281942068 |
| A_23_P79518    | NM_000576       | IL1B          | interleukin 1, beta                                              | ENST00000263341 | -1,287665284 |
| A_23_P79518    | NM_000576       | IL1B          | interleukin 1, beta                                              | ENST00000263341 | -1,302839452 |
| A_23_P167328   | NM_001775       | CD38          | CD38 molecule                                                    | ENST00000540195 | -1,309696128 |
| A_32_P96000    | NM_001004341    | ETV3L         | ets variant 3-like                                               | ENST00000454449 | -1,314324876 |
| A_23_P7560     | NM_002187       | IL12B         | interleukin 12B (natural killer cell stimulatory factor 2, cytot | ENST00000231228 | -1,318727002 |
| A_23_P79518    | NM_000576       | IL1B          | interleukin 1, beta                                              | ENST00000263341 | -1,321435901 |
| A_19_P00808588 | NR_003133       | GBP1P1        |                                                                  | ENST00000513638 | -1,345409412 |
| A_23_P8801     | NM_000777       | CYP3A5        | cytochrome P450, family 3, subfamily A, polypeptide 5            | ENST00000339843 | -1,366962208 |
| A_19_P00812190 | THC2520127      | Q5D1D6        |                                                                  |                 | -1,372468147 |
| A_23_P24004    | NM_001547       | IFIT2         | interferon-induced protein with tetratricopeptide repeats 2      | ENST00000371826 | -1,375705572 |
| A_23_P125278   | NM_005409       | CXCL11        | chemokine (C-X-C motif) ligand 11                                | ENST00000306621 | -1,395949739 |
| A_33_P3319925  | ENST00000449753 | IRG1          | immunoresponsive 1 homolog (mouse)                               | ENST00000449753 | -1,421004035 |
| A_33_P3567892  | AL050263        | DKFZP547J0410 | DKFZP547J0410 protein                                            |                 | -1,542614385 |
| A_33_P3343175  | NM_001565       | CXCL10        | chemokine (C-X-C motif) ligand 10                                | ENST00000306602 | -1,577878382 |
| A_23_P45871    | NM_006820       | IFI44L        | interferon-induced protein 44-like                               | ENST00000476521 | -1,604634376 |
| A_33_P3380383  | NM_001099221    | TIFAB         | TRAF-interacting protein with forkhead-associated domain,        | ENST00000537858 | -1,634237481 |
| A_23_P35092    | NM_153758       | IL19          | interleukin 19                                                   | ENST00000270218 | -1,661514253 |
| A_33_P3341499  | NM_003392       | WNT5A         | wingless-type MMTV integration site family, member 5A            | ENST00000264634 | -1,682642192 |
| A_23_P207456   | NM_005623       | CCL8          | chemokine (C-C motif) ligand 8                                   | ENST00000225840 | -1,777723569 |

A\_33\_P3364488

NM\_001170631

FCAMR

Fc receptor, IgA, IgM, high affinity

ENST00000450945

-1,921707519

Comparison of gene expression profiling between CopV-infected macrophages

| ProbeName     | SystematicName  | GeneSymbol  | GeneName                                           | EnsemblID       | CopV vs MØ_logFC |
|---------------|-----------------|-------------|----------------------------------------------------|-----------------|------------------|
| A_21_P0000504 | NR_023344       | RNU6ATAC    | RNA, U6atac small nuclear (U12-dependent splicing) |                 | 2,657468841      |
| A_21_P0000513 | NR_026703       | VTRNA1-1    | vault RNA 1-1                                      |                 | 2,359080889      |
| A_33_P3273584 | NR_003023       | SCARNA2     | small Cajal body-specific RNA 2                    |                 | 2,345103807      |
| A_33_P3279708 | NR_002761       | RNU2-2      | RNA, U2 small nuclear 2                            | ENST00000538098 | 2,344636761      |
| A_33_P3390107 | NR_003286       | RN18S1      | RNA, 18S ribosomal 1                               |                 | 2,224536218      |
| A_21_P0000514 | NR_026704       | VTRNA1-2    | vault RNA 1-2                                      |                 | 2,096576508      |
| A_21_P0004624 | ENST00000440848 | XLOC_005128 |                                                    | ENST00000440848 | 2,022668875      |
| A_23_P388871  | NM_175054       | HIST4H4     | histone cluster 4, H4                              | ENST00000539745 | 2,016902169      |
| A_33_P3420259 | NR_003287       | RN28S1      | RNA, 28S ribosomal 1                               |                 | 1,927546432      |
| A_33_P3336632 | NR_003287       | RN28S1      | RNA, 28S ribosomal 1                               |                 | 1,908983599      |
| A_21_P0000392 | NR_003076       | SNORD98     | small nucleolar RNA, C/D box 98                    | ENST00000483264 | 1,883318273      |
| A_23_P363936  | NM_014278       | HSPA4L      | heat shock 70kDa protein 4-like                    | ENST00000296464 | 1,851609822      |
| A_23_P359540  | NM_003540       | HIST1H4F    | histone cluster 1, H4f                             | ENST00000377745 | 1,821132243      |
| A_33_P3327519 | NR_002915       | SNORA74A    | small nucleolar RNA, H/ACA box 74A                 |                 | 1,817452129      |
| A_23_P30805   | NM_021968       | HIST1H4J    | histone cluster 1, H4j                             | ENST00000355057 | 1,754127197      |
| A_21_P0000584 | NR_030583       | VTRNA2-1    | vault RNA 2-1                                      |                 | 1,75262622       |
| A_21_P0000487 | NR_004378       | SNORD94     | small nucleolar RNA, C/D box 94                    |                 | 1,746220584      |
| A_33_P3267263 | NR_004400       | RNU1-5      | RNA, U1 small nuclear 5                            |                 | 1,727697794      |
| A_21_P0000515 | NR_026705       | VTRNA1-3    | vault RNA 1-3                                      |                 | 1,723213688      |
| A_23_P69537   | NM_006681       | NMU         | neuromedin U                                       | ENST00000541393 | 1,707560879      |
| A_33_P3351851 | NM_003546       | HIST1H4L    | histone cluster 1, H4l                             | ENST00000355981 | 1,68846096       |
| A_33_P3410836 | NM_003539       | HIST1H4D    | histone cluster 1, H4d                             | ENST00000340756 | 1,686103194      |
| A_23_P436281  | NM_001034077    | HIST2H4B    | histone cluster 2, H4b                             | ENST00000392933 | 1,682179597      |
| A_33_P3363120 | NR_004387       | SCARNA10    | small Cajal body-specific RNA 10                   |                 | 1,668244028      |
| A_33_P3332348 | NR_002715       | RN7SL1      | RNA, 7SL, cytoplasmic 1                            | ENST00000553637 | 1,655367564      |
| A_33_P3271121 | ENST00000484097 | SH3BP4      | SH3-domain binding protein 4                       | ENST00000484097 | 1,611287026      |

|                |                 |              |                                                                       |                 |              |
|----------------|-----------------|--------------|-----------------------------------------------------------------------|-----------------|--------------|
| A_23_P431179   | NM_003538       | HIST1H4A     | histone cluster 1, H4a                                                | ENST00000359907 | 1,603897447  |
| A_23_P323685   | NM_003543       | HIST1H4H     | histone cluster 1, H4h                                                | ENST00000377727 | 1,586318133  |
| A_23_P164451   | NM_005994       | TBX2         | T-box 2                                                               | ENST00000477081 | 1,578931252  |
| A_23_P30813    | NM_003541       | HIST1H4K     | histone cluster 1, H4k                                                | ENST00000357549 | 1,571033919  |
| A_21_P0000371  | NR_003037       | SNORD7       | small nucleolar RNA, C/D box 7                                        |                 | 1,557325175  |
| A_24_P20873    | NM_003495       | HIST1H4I     | histone cluster 1, H4i                                                | ENST00000354348 | 1,542665774  |
| A_33_P3299865  | NM_003541       | HIST1H4K     | histone cluster 1, H4k                                                | ENST00000355057 | 1,537884945  |
| A_21_P0000372  | NR_003042       | SNORD45C     | small nucleolar RNA, C/D box 45C                                      | ENST00000471759 | 1,535339516  |
| A_33_P3389394  | NR_002312       | RPPH1        | ribonuclease P RNA component H1                                       | ENST00000554988 | 1,512611015  |
| A_23_P80032    | NM_005225       | E2F1         | E2F transcription factor 1                                            | ENST00000343380 | -0,49999638  |
| A_23_P402670   | NM_001763       | CD1A         | CD1a molecule                                                         | ENST00000289429 | -0,500048473 |
| A_33_P3354181  | NM_020122       | KCMF1        | potassium channel modulatory factor 1                                 | ENST00000409785 | -0,500078125 |
| A_33_P3251492  | NR_026913       | LOC100133669 | uncharacterized LOC100133669                                          |                 | -0,500275213 |
| A_23_P40295    | NM_012261       | C20orf103    | chromosome 20 open reading frame 103                                  | ENST00000246070 | -0,50027675  |
| A_23_P502832   | NM_006047       | RBM12        | RNA binding motif protein 12                                          | ENST00000374114 | -0,500344768 |
| A_33_P3314356  | ENST00000315194 | PPM1K        | protein phosphatase, Mg <sup>2+</sup> /Mn <sup>2+</sup> dependent, 1K | ENST00000315194 | -0,500400697 |
| A_23_P94902    | NM_198353       | KCTD8        | potassium channel tetramerisation domain containing 8                 | ENST00000360029 | -0,500440433 |
| A_23_P120931   | NM_014508       | APOBEC3C     | apolipoprotein B mRNA editing enzyme, catalytic polypeptide 3         | ENST00000361441 | -0,500448972 |
| A_23_P114185   | NM_004615       | TSPAN7       | tetraspanin 7                                                         | ENST00000422612 | -0,500649376 |
| A_21_P0003320  | BC040914        | XLOC_003738  |                                                                       |                 | -0,500728929 |
| A_33_P3390950  | AK125852        | LOC100128338 | uncharacterized LOC100128338                                          |                 | -0,500760646 |
| A_23_P134854   | NM_194284       | CLDN23       | claudin 23                                                            | ENST00000519106 | -0,500810441 |
| A_23_P122976   | NM_002069       | GNAI1        | guanine nucleotide binding protein (G protein), alpha inhibitory 1    | ENST00000351004 | -0,500852514 |
| A_23_P102988   | NM_006440       | TXNRD2       | thioredoxin reductase 2                                               | ENST00000471149 | -0,500878391 |
| A_24_P189533   | NM_015036       | ENDOD1       | endonuclease domain containing 1                                      | ENST00000278505 | -0,500891041 |
| A_23_P320021   | NM_003322       | TULP1        | tubby like protein 1                                                  | ENST00000545327 | -0,500915322 |
| A_19_P00322407 | NR_034115       | LOC729178    | uncharacterized LOC729178                                             |                 | -0,500991824 |
| A_23_P110791   | NM_005211       | CSF1R        | colony stimulating factor 1 receptor                                  | ENST00000286301 | -0,500995361 |
| A_23_P103864   | NM_024525       | TTC13        | tetratricopeptide repeat domain 13                                    | ENST00000414259 | -0,501041691 |

|               |                 |              |                                                             |                 |              |
|---------------|-----------------|--------------|-------------------------------------------------------------|-----------------|--------------|
| A_21_P0014073 | ENST00000455503 | LOC100505481 |                                                             | ENST00000455503 | -0,501146539 |
| A_33_P3368830 | NM_001033667    | LY9          | lymphocyte antigen 9                                        | ENST00000368039 | -0,501202379 |
| A_24_P411749  | NM_020455       | GPR126       | G protein-coupled receptor 126                              | ENST00000367609 | -0,501219488 |
| A_24_P274270  | NM_139266       | STAT1        | signal transducer and activator of transcription 1, 91kDa   | ENST00000540176 | -0,501224369 |
| A_23_P145718  | NM_001637       | AOAH         | acyloxyacyl hydrolase (neutrophil)                          | ENST00000483864 | -0,501291346 |
| A_23_P109171  | NM_001195       | BFSP1        | beaded filament structural protein 1, filensin              | ENST00000536626 | -0,501330335 |
| A_23_P120931  | NM_014508       | APOBEC3C     | apolipoprotein B mRNA editing enzyme, catalytic polypeptide | ENST00000361441 | -0,501371551 |
| A_21_P0010458 | TCONS_00029736  | XLOC_014411  |                                                             |                 | -0,50142001  |
| A_33_P3311473 | NM_020453       | ATP10D       | ATPase, class V, type 10D                                   | ENST00000273859 | -0,501437261 |
| A_23_P101871  | NM_024907       | FBXO17       | F-box protein 17                                            | ENST00000292852 | -0,501448772 |
| A_32_P89352   | NM_080676       | MACROD2      | MACRO domain containing 2                                   | ENST00000217246 | -0,501485017 |
| A_33_P3225332 | AK124122        | LOC100288884 | uncharacterized LOC100288884                                |                 | -0,501516791 |
| A_23_P118254  | NM_001451       | FOXF1        | forkhead box F1                                             | ENST00000262426 | -0,501538018 |
| A_33_P3400943 | NM_001199054    | C16orf5      | chromosome 16 open reading frame 5                          | ENST00000399599 | -0,501539691 |
| A_24_P191971  | NM_024632       | SAP30L       | SAP30-like                                                  |                 | -0,501553296 |
| A_23_P149084  | NM_000831       | GRIK3        | glutamate receptor, ionotropic, kainate 3                   | ENST00000373093 | -0,501615645 |
| A_21_P0005769 | TCONS_00014869  | XLOC_006938  |                                                             |                 | -0,501709434 |
| A_21_P0000454 | NR_003360       | SNORD116-29  | small nucleolar RNA, C/D box 116-29                         |                 | -0,50171009  |
| A_32_P4626    | XR_108654       | LOC100505880 | uncharacterized LOC100505880                                |                 | -0,501745015 |
| A_23_P133293  | NM_024717       | MCTP1        | multiple C2 domains, transmembrane 1                        | ENST00000505078 | -0,50176991  |
| A_24_P205589  | NM_007274       | ACOT7        | acyl-CoA thioesterase 7                                     | ENST00000481175 | -0,501991371 |
| A_23_P41942   | NM_006467       | POLR3G       | polymerase (RNA) III (DNA directed) polypeptide G (32kD)    | ENST00000399107 | -0,502009061 |
| A_21_P0002711 | NR_034088       | LOC401109    | uncharacterized LOC401109                                   |                 | -0,502163438 |
| A_24_P221575  | NM_001037442    | RUFY3        | RUN and FYVE domain containing 3                            | ENST00000536664 | -0,502414222 |
| A_21_P0003449 | ENST00000503815 | XLOC_003900  |                                                             | ENST00000503815 | -0,502712216 |
| A_23_P200030  | NM_003838       | FPGT         | fucose-1-phosphate guanylyltransferase                      | ENST00000370898 | -0,502780061 |
| A_23_P207400  | NM_007300       | BRCA1        | breast cancer 1, early onset                                | ENST00000412061 | -0,502860742 |
| A_23_P12082   | NM_001025199    | CHI3L2       | chitinase 3-like 2                                          | ENST00000369748 | -0,502878343 |
| A_23_P88691   | NM_000745       | CHRNA5       | cholinergic receptor, nicotinic, alpha 5                    | ENST00000299565 | -0,502894795 |



|                |                  |                |                                                             |                 |              |
|----------------|------------------|----------------|-------------------------------------------------------------|-----------------|--------------|
| A_33_P3290914  | NM_006306        | SMC1A          | structural maintenance of chromosomes 1A                    | ENST00000340213 | -0,502981139 |
| A_23_P58321    | NM_001237        | CCNA2          | cyclin A2                                                   | ENST00000274026 | -0,503000579 |
| A_21_P0008683  | TCONS_00023530   | XLOC_011368    |                                                             |                 | -0,503099318 |
| A_23_P26583    | NM_032206        | NLRC5          | NLR family, CARD domain containing 5                        | ENST00000545081 | -0,503127338 |
| A_21_P0007919  | ENST00000447784  | XLOC_010286    |                                                             | ENST00000447784 | -0,503239263 |
| A_33_P3349651  | NM_015055        | SWAP70         | SWAP switching B-cell complex 70kDa subunit                 | ENST00000318950 | -0,503256034 |
| A_23_P102950   | NM_080860        | RSPH1          | radial spoke head 1 homolog (Chlamydomonas)                 | ENST00000493019 | -0,503287135 |
| A_23_P251881   | NM_147130        | NCR3           | natural cytotoxicity triggering receptor 3                  | ENST00000376073 | -0,503359394 |
| A_21_P0014116  | ENST00000503006  | LOC100507134   |                                                             | ENST00000503006 | -0,50348768  |
| A_19_P00316625 | NR_038346        | MAGI2-AS3      |                                                             | ENST00000424477 | -0,503594416 |
| A_24_P274270   | NM_139266        | STAT1          | signal transducer and activator of transcription 1, 91kDa   | ENST00000540176 | -0,503618165 |
| A_23_P408376   | NM_025015        | HSPA12A        | heat shock 70kDa protein 12A                                | ENST00000369209 | -0,503724084 |
| A_24_P118196   | NM_001080393     | GXYLT2         | glucoside xylosyltransferase 2                              | ENST00000389617 | -0,503859599 |
| A_23_P114983   | NM_032588        | TRIM63         | tripartite motif containing 63                              | ENST00000374272 | -0,504013675 |
| A_33_P3391290  | NM_001142483     | C5orf13        | chromosome 5 open reading frame 13                          | ENST00000507742 | -0,504038956 |
| A_19_P00320492 | DQ272581         | XLOC_I2_013001 |                                                             |                 | -0,504089549 |
| A_23_P335848   | NM_057169        | GIT2           | G protein-coupled receptor kinase interacting ArfGAP 2      | ENST00000361006 | -0,504094412 |
| A_33_P3285734  | NM_001004310     | FCRL6          | Fc receptor-like 6                                          | ENST00000392235 | -0,50414447  |
| A_21_P0000574  | NM_001047        | SRD5A1         | steroid-5-alpha-reductase, alpha polypeptide 1 (3-oxo-5 alp | ENST00000274192 | -0,504224298 |
| A_23_P31135    | NM_005891        | ACAT2          | acetyl-CoA acetyltransferase 2                              | ENST00000472052 | -0,504252386 |
| A_33_P3252093  | NM_006827        | TMED10         | transmembrane emp24-like trafficking protein 10 (yeast)     | ENST00000303575 | -0,504256322 |
| A_21_P0013353  | TCONS_I2_0002695 | XLOC_I2_014048 |                                                             |                 | -0,504361279 |
| A_23_P131208   | NM_006186        | NR4A2          | nuclear receptor subfamily 4, group A, member 2             | ENST00000417972 | -0,504399771 |
| A_24_P937405   | NM_007173        | PRSS23         | protease, serine, 23                                        | ENST00000280258 | -0,50452204  |
| A_23_P99275    | NM_002258        | KLRB1          | killer cell lectin-like receptor subfamily B, member 1      | ENST00000229402 | -0,504644189 |
| A_33_P3358342  | NM_005067        | SIAH2          | seven in absentia homolog 2 (Drosophila)                    | ENST00000312960 | -0,504675634 |
| A_24_P10233    | NM_014326        | DAPK2          | death-associated protein kinase 2                           | ENST00000457488 | -0,504751553 |
| A_21_P0012674  | ENST00000512915  | XLOC_I2_011204 |                                                             | ENST00000512915 | -0,504881581 |
| A_23_P119337   | NM_012068        | ATF5           | activating transcription factor 5                           | ENST00000423777 | -0,505000523 |

|               |                 |             |                                                              |                 |              |
|---------------|-----------------|-------------|--------------------------------------------------------------|-----------------|--------------|
| A_33_P3261408 | NM_147196       | TMIE        | transmembrane inner ear                                      |                 | -0,505036117 |
| A_33_P3337131 | NR_027426       | LOC648691   | uncharacterized LOC648691                                    | ENST00000407120 | -0,505046202 |
| A_33_P3256303 | NM_001206609    | SELPLG      | selectin P ligand                                            | ENST00000388962 | -0,505533599 |
| A_23_P120254  | NM_020185       | DUSP22      | dual specificity phosphatase 22                              | ENST00000344450 | -0,505585719 |
| A_33_P3404123 | ENST00000391354 | KRTAP9-7    | keratin associated protein 9-7                               | ENST00000391354 | -0,505598868 |
| A_33_P3818787 | NR_027277       | LOC344967   | acyl-CoA thioesterase 7 pseudogene                           | ENST00000381811 | -0,505600395 |
| A_24_P73599   | NM_172217       | IL16        | interleukin 16                                               | ENST00000394653 | -0,505684378 |
| A_23_P121825  | NM_024941       | C5orf44     | chromosome 5 open reading frame 44                           | ENST00000545191 | -0,505873466 |
| A_23_P8108    | NM_001243962    | HLA-DQB1    | major histocompatibility complex, class II, DQ beta 1        | ENST00000547498 | -0,505881695 |
| A_33_P3347697 | NM_002515       | NOVA1       | neuro-oncological ventral antigen 1                          | ENST00000539517 | -0,505898539 |
| A_23_P214950  | NM_022121       | PERP        | PERP, TP53 apoptosis effector                                | ENST00000265603 | -0,506228669 |
| A_33_P3290780 | NM_001185156    | IL24        | interleukin 24                                               | ENST00000491169 | -0,506236229 |
| A_33_P3415216 | NM_002437       | MPV17       | MpV17 mitochondrial inner membrane protein                   | ENST00000426513 | -0,506265949 |
| A_21_P0003773 | BX117931        | XLOC_004091 |                                                              |                 | -0,506374511 |
| A_23_P338952  | NM_022753       | S100BPB     | S100P binding protein                                        | ENST00000373475 | -0,506408577 |
| A_33_P3338928 | NM_001343       | DAB2        | disabled homolog 2, mitogen-responsive phosphoprotein (I     | ENST00000320816 | -0,506627317 |
| A_24_P274270  | NM_139266       | STAT1       | signal transducer and activator of transcription 1, 91kDa    | ENST00000540176 | -0,506701136 |
| A_23_P110791  | NM_005211       | CSF1R       | colony stimulating factor 1 receptor                         | ENST00000286301 | -0,506767401 |
| A_23_P25935   | NM_007176       | C14orf1     | chromosome 14 open reading frame 1                           | ENST00000256319 | -0,506897803 |
| A_23_P120594  | NM_032501       | ACSS1       | acyl-CoA synthetase short-chain family member 1              | ENST00000537502 | -0,506979782 |
| A_23_P140373  | NM_017791       | FLVCR2      | feline leukemia virus subgroup C cellular receptor family, m | ENST00000238667 | -0,507049151 |
| A_23_P3177    | NM_022054       | KCNK13      | potassium channel, subfamily K, member 13                    | ENST00000282146 | -0,507070732 |
| A_23_P112482  | NM_004925       | AQP3        | aquaporin 3 (Gill blood group)                               | ENST00000494313 | -0,507178369 |
| A_24_P810697  | NM_001008529    | MXRA7       | matrix-remodelling associated 7                              | ENST00000375036 | -0,50717971  |
| A_23_P17012   | NM_024583       | SCRN3       | secernin 3                                                   | ENST00000272732 | -0,507182709 |
| A_33_P3250383 | NM_033133       | CNP         | 2',3'-cyclic nucleotide 3' phosphodiesterase                 |                 | -0,50718519  |
| A_23_P100441  | NM_024946       | FAM192A     | family with sequence similarity 192, member A                | ENST00000309137 | -0,507230578 |
| A_23_P121222  | NM_020165       | RAD18       | RAD18 homolog (S. cerevisiae)                                | ENST00000264926 | -0,507339541 |
| A_23_P92727   | NM_015577       | RAI14       | retinoic acid induced 14                                     | ENST00000428746 | -0,507368688 |

|               |                |              |                                                                |                 |              |
|---------------|----------------|--------------|----------------------------------------------------------------|-----------------|--------------|
| A_33_P3230841 | NM_001003892   | DUPD1        | dual specificity phosphatase and pro isomerase domain con      | ENST00000338487 | -0,507393181 |
| A_33_P3336760 | NM_018849      | ABCB4        | ATP-binding cassette, sub-family B (MDR/TAP), member 4         | ENST00000265723 | -0,507560011 |
| A_23_P101871  | NM_024907      | FBXO17       | F-box protein 17                                               | ENST00000292852 | -0,507750019 |
| A_33_P3362791 | XM_001719518   | LOC100128869 | uncharacterized LOC100128869                                   |                 | -0,507795758 |
| A_24_P189997  | NM_138322      | PCSK6        | proprotein convertase subtilisin/kexin type 6                  | ENST00000331826 | -0,507797983 |
| A_23_P113471  | NM_174912      | FAAH2        | fatty acid amide hydrolase 2                                   | ENST00000491179 | -0,507833234 |
| A_24_P302685  | NM_015320      | ARHGEF4      | Rho guanine nucleotide exchange factor (GEF) 4                 | ENST00000355771 | -0,507904372 |
| A_33_P3245734 | NM_001130022   | ZNF680       | zinc finger protein 680                                        | ENST00000447137 | -0,507933083 |
| A_33_P3220242 | NM_001167575   | C9orf82      | chromosome 9 open reading frame 82                             | ENST00000333916 | -0,50793901  |
| A_23_P370569  | NM_152440      | C12orf66     | chromosome 12 open reading frame 66                            | ENST00000398055 | -0,507941139 |
| A_23_P119778  | NM_020342      | SLC39A10     | solute carrier family 39 (zinc transporter), member 10         | ENST00000409086 | -0,508002369 |
| A_23_P111995  | NM_002318      | LOXL2        | lysyl oxidase-like 2                                           | ENST00000389131 | -0,508002454 |
| A_23_P40174   | NM_004994      | MMP9         | matrix metalloproteinase 9 (gelatinase B, 92kDa gelatinase, ') | ENST00000545925 | -0,508193417 |
| A_24_P277295  | NM_198490      | RAB43        | RAB43, member RAS oncogene family                              | ENST00000315150 | -0,508426004 |
| A_21_P0001265 | TCONS_00000842 | XLOC_000057  |                                                                |                 | -0,508463735 |
| A_23_P63343   | NM_021995      | UTS2         | urotensin 2                                                    | ENST00000054668 | -0,508531092 |
| A_23_P51410   | NM_022743      | SMYD3        | SET and MYND domain containing 3                               | ENST00000453676 | -0,508540952 |
| A_23_P165891  | NM_005680      | TAF1B        | TATA box binding protein (TBP)-associated factor, RNA poly     | ENST00000434858 | -0,508599684 |
| A_23_P203540  | NM_012153      | EHF          | ets homologous factor                                          | ENST00000257831 | -0,508613247 |
| A_23_P26024   | NM_032413      | C15orf48     | chromosome 15 open reading frame 48                            | ENST00000396650 | -0,508638308 |
| A_33_P3364864 | NM_005746      | NAMPT        | nicotinamide phosphoribosyltransferase                         | ENST00000393618 | -0,508731779 |
| A_24_P40626   | NM_022469      | GREM2        | gremlin 2                                                      | ENST00000318160 | -0,508886367 |
| A_23_P122724  | NM_004665      | VNN2         | vanin 2                                                        | ENST00000392389 | -0,508941973 |
| A_23_P115492  | NM_024749      | VASH2        | vasohibin 2                                                    | ENST00000366965 | -0,508971607 |
| A_23_P204947  | NM_004004      | GJB2         | gap junction protein, beta 2, 26kDa                            | ENST00000382844 | -0,508979693 |
| A_23_P24966   | NM_171997      | USP2         | ubiquitin specific peptidase 2                                 | ENST00000525735 | -0,509129022 |
| A_23_P115726  | NM_194298      | SLC16A9      | solute carrier family 16, member 9 (monocarboxylic acid tra    | ENST00000395348 | -0,509197819 |
| A_23_P121825  | NM_024941      | C5orf44      | chromosome 5 open reading frame 44                             | ENST00000545191 | -0,509226038 |
| A_21_P0009346 | TCONS_00025730 | XLOC_012551  |                                                                |                 | -0,509315598 |

|                |                 |              |                                                                  |                 |              |
|----------------|-----------------|--------------|------------------------------------------------------------------|-----------------|--------------|
| A_24_P924862   | NM_213589       | RAPH1        | Ras association (RalGDS/AF-6) and pleckstrin homology domain     | ENST00000319170 | -0,509404264 |
| A_19_P00803606 | AK002196        | Q21C94       |                                                                  |                 | -0,509531299 |
| A_23_P354805   | NM_007249       | KLF12        | Kruppel-like factor 12                                           | ENST00000377669 | -0,509574272 |
| A_33_P3216694  | NM_024503       | HIVEP3       | human immunodeficiency virus type I enhancer binding protein     | ENST00000247584 | -0,509601602 |
| A_23_P202269   | NM_020987       | ANK3         | ankyrin 3, node of Ranvier (ankyrin G)                           | ENST00000280772 | -0,509663255 |
| A_23_P19852    | NM_152558       | IQCE         | IQ motif containing E                                            | ENST00000404984 | -0,509667623 |
| A_23_P137984   | NM_002966       | S100A10      | S100 calcium binding protein A10                                 | ENST00000368809 | -0,509739241 |
| A_32_P26969    | NM_207332       | ERICH1       | glutamate-rich 1                                                 | ENST00000262109 | -0,509748197 |
| A_33_P3269109  | NM_001130686    | GUCY1A3      | guanylate cyclase 1, soluble, alpha 3                            | ENST00000512983 | -0,509768421 |
| A_23_P112452   | NR_003191       | GGTA1P       | glycoprotein, alpha-galactosyltransferase 1 pseudogene           | ENST00000373793 | -0,509860379 |
| A_24_P333716   | NM_022459       | XPO4         | exportin 4                                                       | ENST00000255305 | -0,509945174 |
| A_33_P3281785  | NM_006167       | NKX3-1       | NK3 homeobox 1                                                   | ENST00000300332 | -0,510044543 |
| A_21_P0013591  | XR_108989       | LOC100507540 | uncharacterized LOC100507540                                     |                 | -0,51007838  |
| A_24_P319923   | NM_053025       | MYLK         | myosin light chain kinase                                        | ENST00000418370 | -0,510103647 |
| A_23_P156284   | NM_080881       | DBN1         | drebrin 1                                                        | ENST00000472831 | -0,510290153 |
| A_33_P3575529  | AF309699        | OR5E1P       | olfactory receptor, family 5, subfamily E, member 1 pseudogene   |                 | -0,510303855 |
| A_23_P110184   | NM_006745       | MSMO1        | methylsterol monooxygenase 1                                     | ENST00000393766 | -0,510442945 |
| A_23_P205778   | NM_016194       | GNB5         | guanine nucleotide binding protein (G protein), beta 5           | ENST00000358784 | -0,510502401 |
| A_23_P23765    | NM_014288       | ITGB3BP      | integrin beta 3 binding protein (beta3-endonexin)                | ENST00000283568 | -0,51070054  |
| A_21_P0001059  | ENST00000423842 | XLOC_000554  |                                                                  | ENST00000423842 | -0,510815916 |
| A_23_P141429   | NM_016428       | ABI3         | ABI family, member 3                                             | ENST00000419580 | -0,510857685 |
| A_33_P3360675  | NM_001164761    | PRKAR1B      | protein kinase, cAMP-dependent, regulatory, type I, beta         | ENST00000430040 | -0,510902252 |
| A_23_P103486   | NM_000775       | CYP2J2       | cytochrome P450, family 2, subfamily J, polypeptide 2            | ENST00000469406 | -0,510942396 |
| A_24_P46953    | NM_013257       | SGK3         | serum/glucocorticoid regulated kinase family, member 3           | ENST00000262211 | -0,510964959 |
| A_23_P122976   | NM_002069       | GNAI1        | guanine nucleotide binding protein (G protein), alpha inhibitory | ENST00000351004 | -0,510989637 |
| A_33_P3344243  | NM_001008393    | C4orf46      | chromosome 4 open reading frame 46                               | ENST00000379205 | -0,511124875 |
| A_24_P926783   | NM_001145434    | ZNF880       | zinc finger protein 880                                          | ENST00000422689 | -0,511174825 |
| A_32_P208403   | NM_053064       | GNG2         | guanine nucleotide binding protein (G protein), gamma 2          | ENST00000335281 | -0,511191915 |
| A_23_P121222   | NM_020165       | RAD18        | RAD18 homolog (S. cerevisiae)                                    | ENST00000264926 | -0,5113107   |

|                |                                 |                |                                                                              |                 |              |
|----------------|---------------------------------|----------------|------------------------------------------------------------------------------|-----------------|--------------|
| A_23_P112554   | NM_001855                       | COL15A1        | collagen, type XV, alpha 1                                                   | ENST00000375001 | -0,51131705  |
| A_23_P83751    | NM_024806                       | C11orf63       | chromosome 11 open reading frame 63                                          | ENST00000227349 | -0,511376687 |
| A_23_P256107   | NM_006665                       | HPSE           | heparanase                                                                   | ENST00000507150 | -0,511561864 |
| A_21_P0008960  | THC2655745                      | XLOC_011758    |                                                                              |                 | -0,511570972 |
| A_19_P00315506 | NM_001162893                    | KIAA0040       |                                                                              |                 | -0,511571742 |
| A_33_P3270009  | NM_147223                       | NCOA1          | nuclear receptor coactivator 1                                               | ENST00000405141 | -0,511599888 |
| A_23_P40174    | NM_004994                       | MMP9           | matrix metalloproteinase 9 (gelatinase B, 92kDa gelatinase, 'ENST00000545925 |                 | -0,511604953 |
| A_23_P112452   | NR_003191                       | GGTA1P         | glycoprotein, alpha-galactosyltransferase 1 pseudogene                       | ENST00000373793 | -0,511694483 |
| A_33_P3221528  | NM_004136                       | IREB2          | iron-responsive element binding protein 2                                    | ENST00000258886 | -0,51173396  |
| A_32_P701268   | NM_053002                       | MED12L         | mediator complex subunit 12-like                                             | ENST00000474524 | -0,511754835 |
| A_24_P319364   | NM_016946                       | F11R           | F11 receptor                                                                 | ENST00000368026 | -0,511761557 |
| A_21_P0012804  | ENST00000509161                 | XLOC_I2_011291 |                                                                              | ENST00000509161 | -0,51181354  |
| A_23_P389465   | NM_173598                       | KSR2           | kinase suppressor of ras 2                                                   | ENST00000545002 | -0,511819354 |
| A_32_P163858   | NM_005063                       | SCD            | stearoyl-CoA desaturase (delta-9-desaturase)                                 | ENST00000370355 | -0,511864281 |
| A_32_P211045   | NM_000791                       | DHFR           | dihydrofolate reductase                                                      | ENST00000439211 | -0,511878903 |
| A_33_P3315779  | NM_001165136                    | HERC6          | hect domain and RLD 6                                                        | ENST00000273960 | -0,512048304 |
| A_23_P110791   | NM_005211                       | CSF1R          | colony stimulating factor 1 receptor                                         | ENST00000286301 | -0,512060346 |
| A_23_P148194   | NM_018269                       | ADI1           | acireductone dioxygenase 1                                                   | ENST00000327435 | -0,512070684 |
| A_23_P158096   | ENST00000468565                 | COL27A1        | collagen, type XXVII, alpha 1                                                | ENST00000468565 | -0,512135537 |
| A_24_P183128   | NM_016619                       | PLAC8          | placenta-specific 8                                                          | ENST00000505406 | -0,512221657 |
| A_23_P124427   | NM_012224                       | NEK1           | NIMA (never in mitosis gene a)-related kinase 1                              | ENST00000507142 | -0,512255863 |
| A_23_P10025    | NM_006159                       | NELL2          | NEL-like 2 (chicken)                                                         | ENST00000437801 | -0,512276536 |
| A_23_P422831   | NM_004816                       | FAM189A2       | family with sequence similarity 189, member A2                               | ENST00000257515 | -0,512387336 |
| A_21_P0010528  | TCONS_I2_0000027;XLOC_I2_000196 |                |                                                                              |                 | -0,512407976 |
| A_24_P274270   | NM_139266                       | STAT1          | signal transducer and activator of transcription 1, 91kDa                    | ENST00000540176 | -0,512539785 |
| A_33_P3223648  | NR_037879                       | LOC100505876   | uncharacterized LOC100505876                                                 | ENST00000406711 | -0,512676793 |
| A_33_P3313830  | NR_015360                       | FLJ33630       | uncharacterized LOC644873                                                    |                 | -0,512708085 |
| A_33_P3249649  | NR_038865                       | C19orf29-AS1   | C19orf29 antisense RNA 1 (non-protein coding)                                |                 | -0,512713493 |
| A_23_P23765    | NM_014288                       | ITGB3BP        | integrin beta 3 binding protein (beta3-endonexin)                            | ENST00000283568 | -0,512804412 |



|               |              |               |                                                                       |                 |              |
|---------------|--------------|---------------|-----------------------------------------------------------------------|-----------------|--------------|
| A_33_P3360072 | NM_001161429 | RANBP3L       | RAN binding protein 3-like                                            | ENST00000296604 | -0,512903525 |
| A_23_P256956  | NM_005733    | KIF20A        | kinesin family member 20A                                             | ENST00000502338 | -0,512930215 |
| A_33_P3289356 | NM_001779    | CD58          | CD58 molecule                                                         | ENST00000369489 | -0,512932467 |
| A_32_P73796   | NM_014906    | PPM1E         | protein phosphatase, Mg <sup>2+</sup> /Mn <sup>2+</sup> dependent, 1E | ENST00000308249 | -0,512988751 |
| A_21_P0013799 | U66048       | LOC100272228  | uncharacterized LOC100272228                                          |                 | -0,513182301 |
| A_23_P56759   | NM_016618    | KRCC1         | lysine-rich coiled-coil 1                                             | ENST00000347055 | -0,513194061 |
| A_33_P3409159 | NM_015482    | SLC22A23      | solute carrier family 22, member 23                                   | ENST00000406686 | -0,513213709 |
| A_33_P3357843 | NM_000232    | SGCB          | sarcoglycan, beta (43kDa dystrophin-associated glycoprotein)          | ENST00000381431 | -0,513318712 |
| A_33_P3385957 | NM_012263    | TTL1          | tubulin tyrosine ligase-like family, member 1                         | ENST00000440761 | -0,513343967 |
| A_23_P101871  | NM_024907    | FBXO17        | F-box protein 17                                                      | ENST00000292852 | -0,513515618 |
| A_23_P106922  | NM_021615    | CHST6         | carbohydrate (N-acetylglucosamine 6-O) sulfotransferase 6             | ENST00000332272 | -0,513537118 |
| A_33_P3355230 | NM_002287    | LAIR1         | leukocyte-associated immunoglobulin-like receptor 1                   | ENST00000313038 | -0,513618811 |
| A_24_P40529   | NM_018196    | TMLHE         | trimethyllysine hydroxylase, epsilon                                  | ENST00000334398 | -0,513764579 |
| A_24_P154948  | NM_002047    | GARS          | glycyl-tRNA synthetase                                                | ENST00000470392 | -0,513815814 |
| A_23_P34537   | NM_000120    | EPHX1         | epoxide hydrolase 1, microsomal (xenobiotic)                          | ENST00000366837 | -0,513818569 |
| A_33_P3729375 | AK093857     | LOC285181     | uncharacterized LOC285181                                             |                 | -0,513926077 |
| A_23_P334218  | NM_145647    | WDR67         | WD repeat domain 67                                                   | ENST00000287380 | -0,514024446 |
| A_33_P3736195 | BX647230     | DKFZp686M1131 | uncharacterized LOC399832                                             |                 | -0,514056901 |
| A_33_P3307163 | NM_001134363 | RBM20         | RNA binding motif protein 20                                          | ENST00000369519 | -0,514068573 |
| A_23_P420293  | NM_145013    | C11orf45      | chromosome 11 open reading frame 45                                   | ENST00000310799 | -0,514189022 |
| A_23_P352266  | NM_000633    | BCL2          | B-cell CLL/lymphoma 2                                                 | ENST00000398117 | -0,514193271 |
| A_23_P119337  | NM_012068    | ATF5          | activating transcription factor 5                                     | ENST00000423777 | -0,514329146 |
| A_24_P295877  | NM_014704    | CEP104        | centrosomal protein 104kDa                                            | ENST00000438539 | -0,514437006 |
| A_33_P3392537 | NM_004614    | TK2           | thymidine kinase 2, mitochondrial                                     | ENST00000451102 | -0,514479758 |
| A_32_P313405  | NM_005559    | LAMA1         | laminin, alpha 1                                                      | ENST00000488064 | -0,514563822 |
| A_23_P103070  | NM_003405    | YWHAH         | tyrosine 3-monooxygenase/tryptophan 5-monooxygenase alpha             | ENST00000248975 | -0,514578367 |
| A_33_P3888629 | NM_001164000 | MECOM         | MDS1 and EVI1 complex locus                                           | ENST00000264674 | -0,514654087 |
| A_33_P3247559 | NM_001144937 | FNDC7         | fibronectin type III domain containing 7                              | ENST00000370017 | -0,514678059 |
| A_21_P0000709 | NR_037934    | LOC285540     | uncharacterized LOC285540                                             | ENST00000507794 | -0,514698273 |

|                |                 |                |                                                               |                 |              |
|----------------|-----------------|----------------|---------------------------------------------------------------|-----------------|--------------|
| A_33_P3318696  | NM_001008661    | CCBL2          | cysteine conjugate-beta lyase 2                               | ENST00000370486 | -0,514735362 |
| A_24_P142118   | NM_003246       | THBS1          | thrombospondin 1                                              | ENST00000260356 | -0,514740502 |
| A_33_P3262431  | NM_032045       | KREMEN1        | kringle containing transmembrane protein 1                    | ENST00000327813 | -0,514745168 |
| A_23_P161076   | NM_001767       | CD2            | CD2 molecule                                                  | ENST00000369478 | -0,514818714 |
| A_21_P0012088  | ENST00000449075 | XLOC_I2_008226 |                                                               | ENST00000449075 | -0,514843846 |
| A_32_P14762    | NM_001080507    | OOEP           | oocyte expressed protein homolog (dog)                        | ENST00000370363 | -0,514873044 |
| A_23_P110184   | NM_006745       | MSMO1          | methylsterol monooxygenase 1                                  | ENST00000393766 | -0,514880443 |
| A_33_P3570208  | NR_036497       | LPP-AS2        | LPP antisense RNA 2 (non-protein coding)                      |                 | -0,514903219 |
| A_33_P3241269  | NM_001025195    | CES1           | carboxylesterase 1                                            | ENST00000360526 | -0,514947791 |
| A_24_P645765   | NM_020782       | KLHDC5         | kelch domain containing 5                                     | ENST00000381271 | -0,514959789 |
| A_23_P50946    | NM_005855       | RAMP1          | receptor (G protein-coupled) activity modifying protein 1     | ENST00000254661 | -0,514982961 |
| A_23_P10025    | NM_006159       | NELL2          | NEL-like 2 (chicken)                                          | ENST00000437801 | -0,515081031 |
| A_19_P00812911 | NR_038842       | LOC728431      | uncharacterized LOC728431                                     | ENST00000424989 | -0,515220051 |
| A_33_P3334908  | NM_145177       | DHRX           | dehydrogenase/reductase (SDR family) X-linked                 | ENST00000334651 | -0,515306304 |
| A_33_P3306823  | NM_001077624    | ZNF846         | zinc finger protein 846                                       | ENST00000397902 | -0,515360148 |
| A_23_P209978   | NM_003385       | VSNL1          | visinin-like 1                                                | ENST00000404666 | -0,515371818 |
| A_23_P109171   | NM_001195       | BFSP1          | beaded filament structural protein 1, filensin                | ENST00000536626 | -0,515449464 |
| A_23_P22224    | NM_004095       | EIF4EBP1       | eukaryotic translation initiation factor 4E binding protein 1 | ENST00000338825 | -0,515584712 |
| A_33_P3264224  | NM_017525       | CDC42BPG       | CDC42 binding protein kinase gamma (DMPK-like)                | ENST00000342711 | -0,515719321 |
| A_24_P365767   | NM_000397       | CYBB           | cytochrome b-245, beta polypeptide                            | ENST00000378588 | -0,515928444 |
| A_23_P31064    | NM_015529       | MOXD1          | monooxygenase, DBH-like 1                                     | ENST00000367963 | -0,515989184 |
| A_23_P103864   | NM_024525       | TTC13          | tetratricopeptide repeat domain 13                            | ENST00000414259 | -0,516052775 |
| A_23_P103070   | NM_003405       | YWHAH          | tyrosine 3-monooxygenase/tryptophan 5-monooxygenase           | ENST00000248975 | -0,51609357  |
| A_33_P3212172  | NM_024798       | SNX22          | sorting nexin 22                                              | ENST00000380278 | -0,516107229 |
| A_24_P84340    | NM_198828       | MAST4          | microtubule associated serine/threonine kinase family member  | ENST00000478569 | -0,516173596 |
| A_23_P165090   | NM_024407       | NDUFS7         | NADH dehydrogenase (ubiquinone) Fe-S protein 7, 20kDa (F1)    | ENST00000534853 | -0,516189835 |
| A_24_P80500    | NM_020139       | BDH2           | 3-hydroxybutyrate dehydrogenase, type 2                       |                 | -0,51632807  |
| A_24_P196384   | XR_132594       | LOC100129502   | uncharacterized LOC100129502                                  |                 | -0,516356461 |
| A_21_P0007570  | THC2720680      | XLOC_009782    |                                                               |                 | -0,516367803 |

|                |                 |                |                                                                |                 |              |
|----------------|-----------------|----------------|----------------------------------------------------------------|-----------------|--------------|
| A_33_P3326617  | NM_001018104    | FAHD1          | fumarylacetoacetate hydrolase domain containing 1              | ENST00000382666 | -0,516468801 |
| A_24_P274270   | NM_139266       | STAT1          | signal transducer and activator of transcription 1, 91kDa      | ENST00000540176 | -0,516500429 |
| A_23_P105535   | NM_172240       | POC1B          | POC1 centriolar protein homolog B (Chlamydomonas)              | ENST00000378528 | -0,516500963 |
| A_23_P169197   | NM_032303       | HSDL2          | hydroxysteroid dehydrogenase like 2                            | ENST00000398803 | -0,516514328 |
| A_23_P110941   | NM_001512       | GSTA4          | glutathione S-transferase alpha 4                              | ENST00000370960 | -0,516518269 |
| A_24_P366526   | BC105992        | SYNGR2         | synaptogyrin 2                                                 |                 | -0,516612987 |
| A_24_P48495    | NM_014400       | LYPD3          | LY6/PLAUR domain containing 3                                  | ENST00000244333 | -0,516638045 |
| A_33_P3333982  | NM_022359       | PDE4DIP        | phosphodiesterase 4D interacting protein                       | ENST00000527063 | -0,516649026 |
| A_24_P22050    | NM_017817       | RAB20          | RAB20, member RAS oncogene family                              | ENST00000267328 | -0,516663385 |
| A_33_P3274332  | NM_016021       | UBE2J1         | ubiquitin-conjugating enzyme E2, J1, U                         | ENST00000435041 | -0,516714345 |
| A_23_P110791   | NM_005211       | CSF1R          | colony stimulating factor 1 receptor                           | ENST00000286301 | -0,516760536 |
| A_32_P489      | NR_038399       | LOC100132735   | uncharacterized LOC100132735                                   | ENST00000414038 | -0,516784517 |
| A_21_P0002086  | ENST00000443123 | XLOC_002250    |                                                                | ENST00000443123 | -0,516834429 |
| A_23_P10025    | NM_006159       | NELL2          | NEL-like 2 (chicken)                                           | ENST00000437801 | -0,516894382 |
| A_23_P10518    | NM_016521       | TFDP3          | transcription factor Dp family, member 3                       | ENST00000310125 | -0,516964678 |
| A_21_P0000144  | NM_001199233    | LOC100505478   | uncharacterized protein LOC100505478                           | ENST00000436752 | -0,516977927 |
| A_24_P274270   | NM_139266       | STAT1          | signal transducer and activator of transcription 1, 91kDa      | ENST00000540176 | -0,517270089 |
| A_19_P00316455 | ENST00000431554 | P39194         |                                                                | ENST00000431554 | -0,517270339 |
| A_23_P109171   | NM_001195       | BFSP1          | beaded filament structural protein 1, filensin                 | ENST00000536626 | -0,517475238 |
| A_33_P3304382  | NM_152416       | C8orf38        | chromosome 8 open reading frame 38                             | ENST00000396124 | -0,517481333 |
| A_33_P3407289  | NR_027436       | LOC283788      | FSHD region gene 1 pseudogene                                  | ENST00000418749 | -0,517483308 |
| A_33_P3417313  | NM_023078       | PYCR1          | pyrroline-5-carboxylate reductase-like                         | ENST00000377579 | -0,517547025 |
| A_23_P40174    | NM_004994       | MMP9           | matrix metalloproteinase 9 (gelatinase B, 92kDa gelatinase, ') | ENST00000545925 | -0,517582513 |
| A_33_P3396139  | NM_005214       | CTLA4          | cytotoxic T-lymphocyte-associated protein 4                    | ENST00000302823 | -0,517587174 |
| A_32_P60223    | NM_032329       | ING5           | inhibitor of growth family, member 5                           | ENST00000313552 | -0,517693746 |
| A_21_P0014472  | XR_109972       | SOS1-IT1       | SOS1 intronic transcript 1 (non-protein coding)                |                 | -0,517742493 |
| A_33_P3248992  | NM_001609       | ACADSB         | acyl-CoA dehydrogenase, short/branched chain                   | ENST00000358776 | -0,517805453 |
| A_19_P00318418 | NM_001166254    | TBXAS1         | thromboxane A synthase 1 (platelet)                            | ENST00000481440 | -0,517808967 |
| A_19_P00317173 | THC2524841      | XLOC_I2_010723 |                                                                |                 | -0,518050778 |

|               |                 |              |                                                               |                 |  |              |
|---------------|-----------------|--------------|---------------------------------------------------------------|-----------------|--|--------------|
| A_21_P0001637 | TCONS_00001853  | XLOC_001241  |                                                               |                 |  | -0,518092146 |
| A_23_P432610  | NM_153029       | N4BP1        | NEDD4 binding protein 1                                       | ENST00000262384 |  | -0,5181226   |
| A_23_P120594  | NM_032501       | ACSS1        | acyl-CoA synthetase short-chain family member 1               | ENST00000537502 |  | -0,518139219 |
| A_23_P40174   | NM_004994       | MMP9         | matrix metalloproteinase 9 (gelatinase B, 92kDa gelatinase, 1 | ENST00000545925 |  | -0,518236554 |
| A_21_P0007133 | AK056982        | XLOC_009372  |                                                               |                 |  | -0,518250923 |
| A_21_P0010773 | NR_033856       | FLJ43315     | asparagine synthetase pseudogene                              | ENST00000416367 |  | -0,518427049 |
| A_32_P54503   | NR_024451       | LOC100134229 | uncharacterized LOC100134229                                  |                 |  | -0,518533994 |
| A_23_P16469   | NM_001005377    | PLAUR        | plasminogen activator, urokinase receptor                     | ENST00000221264 |  | -0,518560548 |
| A_24_P274270  | NM_139266       | STAT1        | signal transducer and activator of transcription 1, 91kDa     | ENST00000540176 |  | -0,518561865 |
| A_23_P91640   | NM_020437       | ASPHD2       | aspartate beta-hydroxylase domain containing 2                | ENST00000215906 |  | -0,518659413 |
| A_23_P503182  | NM_021962       | ABR          | active BCR-related gene                                       | ENST00000291107 |  | -0,518712627 |
| A_23_P209232  | NM_024692       | CLIP4        | CAP-GLY domain containing linker protein family, member 4     | ENST00000379543 |  | -0,51879239  |
| A_23_P110791  | NM_005211       | CSF1R        | colony stimulating factor 1 receptor                          | ENST00000286301 |  | -0,51891523  |
| A_24_P380061  | NM_001025616    | ARHGAP24     | Rho GTPase activating protein 24                              | ENST00000264343 |  | -0,518950958 |
| A_23_P108751  | NM_001039492    | FHL2         | four and a half LIM domains 2                                 | ENST00000358129 |  | -0,518974928 |
| A_21_P0011734 | XR_109588       | LOC100505851 | uncharacterized LOC100505851                                  |                 |  | -0,519207989 |
| A_33_P3416286 | NM_006047       | RBM12        | RNA binding motif protein 12                                  | ENST00000359646 |  | -0,519260793 |
| A_23_P3302    | NM_018365       | MNS1         | meiosis-specific nuclear structural 1                         | ENST00000260453 |  | -0,519349308 |
| A_23_P58321   | NM_001237       | CCNA2        | cyclin A2                                                     | ENST00000274026 |  | -0,519431211 |
| A_23_P103511  | NM_001085375    | C1orf226     | chromosome 1 open reading frame 226                           | ENST00000458626 |  | -0,519475177 |
| A_23_P11800   | NM_018584       | CAMK2N1      | calcium/calmodulin-dependent protein kinase II inhibitor 1    | ENST00000375078 |  | -0,519487716 |
| A_23_P152620  | NM_172088       | TNFSF13      | tumor necrosis factor (ligand) superfamily, member 13         | ENST00000380535 |  | -0,51964537  |
| A_23_P115726  | NM_194298       | SLC16A9      | solute carrier family 16, member 9 (monocarboxylic acid tra   | ENST00000395348 |  | -0,520026482 |
| A_23_P2705    | NM_005767       | LPAR6        | lysophosphatidic acid receptor 6                              | ENST00000345941 |  | -0,52006827  |
| A_33_P3342633 | NM_001031719    | DHRS12       | dehydrogenase/reductase (SDR family) member 12                | ENST00000280056 |  | -0,520125853 |
| A_23_P430411  | ENST00000545414 | ITGB2        | integrin, beta 2 (complement component 3 receptor 3 and       | ENST00000545414 |  | -0,520126011 |
| A_23_P414978  | NM_177533       | NUDT14       | nudix (nucleoside diphosphate linked moiety X)-type motif     | ENST00000339418 |  | -0,520338009 |
| A_23_P67042   | NM_017947       | MOCOS        | molybdenum cofactor sulfurase                                 | ENST00000261326 |  | -0,520372189 |
| A_23_P76799   | NM_013448       | BAZ1A        | bromodomain adjacent to zinc finger domain, 1A                | ENST00000360310 |  | -0,52037357  |

|               |                 |             |                                                                       |                 |              |
|---------------|-----------------|-------------|-----------------------------------------------------------------------|-----------------|--------------|
| A_23_P31844   | NM_001693       | ATP6V1B2    | ATPase, H <sup>+</sup> transporting, lysosomal 56/58kDa, V1 subunit B | ENST00000523482 | -0,520427485 |
| A_23_P121533  | NM_012445       | SPON2       | spondin 2, extracellular matrix protein                               | ENST00000431380 | -0,520509704 |
| A_23_P210515  | NM_020967       | NCOA5       | nuclear receptor coactivator 5                                        | ENST00000290231 | -0,520514121 |
| A_23_P113393  | NM_017413       | APLN        | apelin                                                                | ENST00000307484 | -0,520588165 |
| A_24_P274270  | NM_139266       | STAT1       | signal transducer and activator of transcription 1, 91kDa             | ENST00000540176 | -0,520601084 |
| A_23_P28857   | NM_018556       | SIRPG       | signal-regulatory protein gamma                                       | ENST00000381580 | -0,52060676  |
| A_23_P145238  | NM_080593       | HIST1H2BK   | histone cluster 1, H2bk                                               | ENST00000396891 | -0,520639937 |
| A_21_P0007403 | NR_034148       | LOC283143   | uncharacterized LOC283143                                             |                 | -0,520698742 |
| A_23_P40174   | NM_004994       | MMP9        | matrix metalloproteinase 9 (gelatinase B, 92kDa gelatinase, ')        | ENST00000545925 | -0,520700159 |
| A_24_P942354  | NM_006224       | PITPNA      | phosphatidylinositol transfer protein, alpha                          | ENST00000313486 | -0,520757493 |
| A_33_P3400192 | NM_001135044    | MAPK9       | mitogen-activated protein kinase 9                                    | ENST00000425491 | -0,520895316 |
| A_21_P0007154 | ENST00000449749 | XLOC_009355 |                                                                       | ENST00000449749 | -0,520910775 |
| A_23_P103864  | NM_024525       | TTC13       | tetratricopeptide repeat domain 13                                    | ENST00000414259 | -0,520936246 |
| A_23_P102017  | NM_020711       | ERMN        | ermin, ERM-like protein                                               | ENST00000397283 | -0,520938927 |
| A_23_P76799   | NM_013448       | BAZ1A       | bromodomain adjacent to zinc finger domain, 1A                        | ENST00000360310 | -0,520991936 |
| A_33_P3251896 | NM_004307       | APBB2       | amyloid beta (A4) precursor protein-binding, family B, mem            | ENST00000316212 | -0,521024625 |
| A_33_P3637909 | NM_015983       | UBE2D4      | ubiquitin-conjugating enzyme E2D 4 (putative)                         |                 | -0,521031574 |
| A_33_P3347452 | NM_021135       | RPS6KA2     | ribosomal protein S6 kinase, 90kDa, polypeptide 2                     | ENST00000510118 | -0,521042513 |
| A_32_P166693  | NM_020733       | HEG1        | HEG homolog 1 (zebrafish)                                             | ENST00000311127 | -0,521083319 |
| A_23_P314145  | NM_005715       | UST         | uronyl-2-sulfotransferase                                             | ENST00000367463 | -0,521085976 |
| A_23_P435407  | NM_001448       | GPC4        | glypican 4                                                            | ENST00000536418 | -0,521088402 |
| A_33_P3709150 | NM_003181       | T           | T, brachyury homolog (mouse)                                          | ENST00000366871 | -0,521181624 |
| A_33_P3229477 | NM_173496       | MPP7        | membrane protein, palmitoylated 7 (MAGUK p55 subfamily                | ENST00000337532 | -0,521313831 |
| A_33_P3222689 | NM_001164416    | H2BFM       | H2B histone family, member M                                          | ENST00000243297 | -0,521365935 |
| A_33_P3368014 | NM_001040107    | HVCN1       | hydrogen voltage-gated channel 1                                      | ENST00000356742 | -0,521455833 |
| A_23_P354705  | NM_003034       | ST8SIA1     | ST8 alpha-N-acetyl-neuraminide alpha-2,8-sialyltransferase            | ENST00000396037 | -0,521522497 |
| A_23_P201628  | NM_002293       | LAMC1       | laminin, gamma 1 (formerly LAMB2)                                     | ENST00000258341 | -0,521523121 |
| A_32_P66881   | NM_138554       | TLR4        | toll-like receptor 4                                                  |                 | -0,521523946 |
| A_21_P0009767 | TCONS_00027356  | XLOC_013333 |                                                                       |                 | -0,521585396 |



|                |                 |                |                                                               |                 |              |
|----------------|-----------------|----------------|---------------------------------------------------------------|-----------------|--------------|
| A_21_P0003435  | ENST00000507776 | XLOC_003824    |                                                               | ENST00000507776 | -0,5216382   |
| A_23_P10647    | NM_018659       | CYTL1          | cytokine-like 1                                               | ENST00000307746 | -0,521651971 |
| A_21_P0010761  | BC035370        | XLOC_I2_000941 |                                                               |                 | -0,521745216 |
| A_23_P121533   | NM_012445       | SPON2          | spondin 2, extracellular matrix protein                       | ENST00000431380 | -0,521807003 |
| A_21_P0010152  | ENST00000426418 | XLOC_013896    |                                                               | ENST00000426418 | -0,521820968 |
| A_19_P00320749 | NR_003367       | PVT1           |                                                               |                 | -0,521854193 |
| A_23_P110791   | NM_005211       | CSF1R          | colony stimulating factor 1 receptor                          | ENST00000286301 | -0,521949874 |
| A_23_P40174    | NM_004994       | MMP9           | matrix metalloproteinase 9 (gelatinase B, 92kDa gelatinase, 9 | ENST00000545925 | -0,521979156 |
| A_23_P113777   | NM_004791       | ITGBL1         | integrin, beta-like 1 (with EGF-like repeat domains)          | ENST00000376162 | -0,522408617 |
| A_23_P121480   | NM_001004196    | CD200          | CD200 molecule                                                | ENST00000478595 | -0,522418113 |
| A_24_P612446   | NM_152734       | C6orf89        | chromosome 6 open reading frame 89                            |                 | -0,522451649 |
| A_24_P77082    | NM_003679       | KMO            | kynurenine 3-monooxygenase (kynurenine 3-hydroxylase)         | ENST00000366555 | -0,522646748 |
| A_33_P3285195  | XR_109821       | LOC100507012   | uncharacterized LOC100507012                                  | ENST00000510795 | -0,522663575 |
| A_23_P887      | NM_014002       | IKBKE          | inhibitor of kappa light polypeptide gene enhancer in B-cells | ENST00000537984 | -0,522861301 |
| A_21_P0005700  | TCONS_00014720  | XLOC_006810    |                                                               |                 | -0,522876996 |
| A_21_P0014597  | XR_110467       | LOC100507539   | uncharacterized LOC100507539                                  | ENST00000506914 | -0,522895899 |
| A_33_P3305731  | NM_025176       | NINL           | ninein-like                                                   | ENST00000278886 | -0,522930106 |
| A_21_P0010265  | THC2748073      | XLOC_013986    |                                                               |                 | -0,523123064 |
| A_33_P3360341  | NM_001002295    | GATA3          | GATA binding protein 3                                        | ENST00000379328 | -0,523267494 |
| A_19_P00321692 | ENST00000447453 | XLOC_002142    |                                                               | ENST00000447453 | -0,523391312 |
| A_23_P76799    | NM_013448       | BAZ1A          | bromodomain adjacent to zinc finger domain, 1A                | ENST00000360310 | -0,523407345 |
| A_23_P110791   | NM_005211       | CSF1R          | colony stimulating factor 1 receptor                          | ENST00000286301 | -0,523450659 |
| A_23_P112554   | NM_001855       | COL15A1        | collagen, type XV, alpha 1                                    | ENST00000375001 | -0,523586871 |
| A_23_P209394   | NM_001127184    | CFLAR          | CASP8 and FADD-like apoptosis regulator                       | ENST00000461820 | -0,523627316 |
| A_23_P20107    | NM_015917       | GSTK1          | glutathione S-transferase kappa 1                             | ENST00000494735 | -0,523628439 |
| A_23_P103070   | NM_003405       | YWHAH          | tyrosine 3-monooxygenase/tryptophan 5-monooxygenase activator | ENST00000248975 | -0,523757846 |
| A_33_P3423551  | NM_003897       | IER3           | immediate early response 3                                    | ENST00000376382 | -0,523775674 |
| A_24_P274270   | NM_139266       | STAT1          | signal transducer and activator of transcription 1, 91kDa     | ENST00000540176 | -0,523813536 |
| A_23_P433050   | NM_021634       | RXFP1          | relaxin/insulin-like family peptide receptor 1                | ENST00000448688 | -0,523861405 |

|                |                  |                |                                                             |                 |              |
|----------------|------------------|----------------|-------------------------------------------------------------|-----------------|--------------|
| A_23_P122724   | NM_004665        | VNN2           | vanin 2                                                     | ENST00000392389 | -0,523880256 |
| A_19_P00315718 | NM_001145191     | FAM200B        |                                                             | ENST00000502502 | -0,523926171 |
| A_21_P0014610  | XR_110521        | LOC100506941   | uncharacterized LOC100506941                                |                 | -0,524006542 |
| A_23_P121533   | NM_012445        | SPON2          | spondin 2, extracellular matrix protein                     | ENST00000431380 | -0,524031531 |
| A_24_P105733   | NM_022648        | TNS1           | tensin 1                                                    | ENST00000479185 | -0,524063923 |
| A_23_P82523    | NM_000927        | ABCB1          | ATP-binding cassette, sub-family B (MDR/TAP), member 1      | ENST00000475929 | -0,524076403 |
| A_23_P319583   | NM_014747        | RIMS3          | regulating synaptic membrane exocytosis 3                   | ENST00000372684 | -0,524108209 |
| A_21_P0014257  | ENST00000368619  | STK32C         | serine/threonine kinase 32C                                 | ENST00000368619 | -0,524117995 |
| A_23_P133543   | NM_017415        | KLHL3          | kelch-like 3 (Drosophila)                                   | ENST00000309755 | -0,524213574 |
| A_23_P141248   | NM_021947        | SRR            | serine racemase                                             | ENST00000344595 | -0,524257707 |
| A_33_P3251332  | NM_015473        | HEATR5A        | HEAT repeat containing 5A                                   | ENST00000389961 | -0,524260321 |
| A_23_P110791   | NM_005211        | CSF1R          | colony stimulating factor 1 receptor                        | ENST00000286301 | -0,524321429 |
| A_21_P0014373  | XR_109500        | LOC100506419   | uncharacterized LOC100506419                                |                 | -0,524365113 |
| A_21_P0010522  | ENST00000451482  | XLOC_I2_000116 |                                                             | ENST00000451482 | -0,524373078 |
| A_23_P119778   | NM_020342        | SLC39A10       | solute carrier family 39 (zinc transporter), member 10      | ENST00000409086 | -0,524384621 |
| A_24_P411899   | NM_183419        | RNF19A         | ring finger protein 19A                                     | ENST00000341084 | -0,524432112 |
| A_24_P56363    | NM_030925        | CAB39L         | calcium binding protein 39-like                             | ENST00000378341 | -0,524435649 |
| A_33_P3251552  | NM_001029871     | RSPO4          | R-spondin 4                                                 | ENST00000217260 | -0,52448891  |
| A_33_P3318661  | NM_203394        | E2F7           | E2F transcription factor 7                                  | ENST00000339887 | -0,524576969 |
| A_23_P76799    | NM_013448        | BAZ1A          | bromodomain adjacent to zinc finger domain, 1A              | ENST00000360310 | -0,52459836  |
| A_23_P120594   | NM_032501        | ACSS1          | acyl-CoA synthetase short-chain family member 1             | ENST00000537502 | -0,524626645 |
| A_24_P204244   | NR_001562        | ANXA2P1        | annexin A2 pseudogene 1                                     |                 | -0,52464688  |
| A_23_P119337   | NM_012068        | ATF5           | activating transcription factor 5                           | ENST00000423777 | -0,524652152 |
| A_33_P3287502  | NM_000251        | MSH2           | mutS homolog 2, colon cancer, nonpolyposis type 1 (E. coli) | ENST00000419559 | -0,52465817  |
| A_33_P3327847  | NM_003901        | SGPL1          | sphingosine-1-phosphate lyase 1                             | ENST00000373202 | -0,5248878   |
| A_33_P3231297  | NM_003851        | CREG1          | cellular repressor of E1A-stimulated genes 1                | ENST00000370509 | -0,524918688 |
| A_23_P119337   | NM_012068        | ATF5           | activating transcription factor 5                           | ENST00000423777 | -0,524923413 |
| A_21_P0012364  | TCONS_I2_0001843 | XLOC_I2_009613 |                                                             |                 | -0,52494256  |
| A_21_P0001573  | GD150158         | XLOC_000978    |                                                             |                 | -0,525001869 |

|               |                  |                |                                                               |                 |              |
|---------------|------------------|----------------|---------------------------------------------------------------|-----------------|--------------|
| A_33_P3276856 | NM_001198542     | HYDIN          | hydrocephalus inducing homolog (mouse)                        | ENST00000393550 | -0,525313619 |
| A_21_P0011545 | TCONS_I2_0001078 | XLOC_I2_005793 |                                                               |                 | -0,525409806 |
| A_23_P105002  | NM_000327        | ROM1           | retinal outer segment membrane protein 1                      | ENST00000278833 | -0,525834207 |
| A_21_P0006494 | TCONS_00017159   | XLOC_007967    |                                                               |                 | -0,525929554 |
| A_23_P10025   | NM_006159        | NELL2          | NEL-like 2 (chicken)                                          | ENST00000437801 | -0,525936762 |
| A_23_P120594  | NM_032501        | ACSS1          | acyl-CoA synthetase short-chain family member 1               | ENST00000537502 | -0,525966281 |
| A_33_P3379947 | NM_005514        | HLA-B          | major histocompatibility complex, class I, B                  | ENST00000546599 | -0,525988666 |
| A_33_P3375859 | NR_002712        | CXCR2P1        | chemokine (C-X-C motif) receptor 2 pseudogene 1               | ENST00000439871 | -0,526026616 |
| A_23_P118834  | NM_001067        | TOP2A          | topoisomerase (DNA) II alpha 170kDa                           | ENST00000269577 | -0,526094788 |
| A_23_P74701   | NM_152890        | COL24A1        | collagen, type XXIV, alpha 1                                  | ENST00000370571 | -0,526213892 |
| A_23_P11800   | NM_018584        | CAMK2N1        | calcium/calmodulin-dependent protein kinase II inhibitor 1    | ENST00000375078 | -0,526218557 |
| A_23_P43157   | NM_001080416     | MYBL1          | v-myb myeloblastosis viral oncogene homolog (avian)-like 1    | ENST00000522677 | -0,526256885 |
| A_23_P8571    | NM_080744        | SRCRB4D        | scavenger receptor cysteine rich domain containing, group     | ENST00000275560 | -0,526258452 |
| A_23_P12082   | NM_001025199     | CHI3L2         | chitinase 3-like 2                                            | ENST00000369748 | -0,526290346 |
| A_23_P121533  | NM_012445        | SPON2          | spondin 2, extracellular matrix protein                       | ENST00000431380 | -0,526333753 |
| A_23_P114466  | NM_033284        | TBL1Y          | transducin (beta)-like 1, Y-linked                            | ENST00000383032 | -0,52637748  |
| A_23_P114466  | NM_033284        | TBL1Y          | transducin (beta)-like 1, Y-linked                            | ENST00000383032 | -0,526407529 |
| A_23_P427703  | NR_001447        | MT1L           | metallothionein 1L (gene/pseudogene)                          |                 | -0,526423324 |
| A_33_P3292264 | ENST00000360254  | DISP1          | dispatched homolog 1 (Drosophila)                             | ENST00000360254 | -0,526632052 |
| A_23_P145895  | NR_015381        | TP53TG1        | TP53 target 1 (non-protein coding)                            |                 | -0,526683714 |
| A_33_P3293082 | NR_040117        | LOC392364      | chromosome 15 open reading frame 2 pseudogene                 | ENST00000399186 | -0,526719932 |
| A_23_P164405  | NM_033184        | KRTAP2-4       | keratin associated protein 2-4                                | ENST00000394015 | -0,526783764 |
| A_33_P3256810 | NM_004617        | TM4SF4         | transmembrane 4 L six family member 4                         | ENST00000463068 | -0,526786071 |
| A_33_P3419865 | XR_112726        | LOC646719      | uncharacterized LOC646719                                     |                 | -0,527031754 |
| A_21_P0013202 | TCONS_I2_0002590 | XLOC_I2_013425 |                                                               |                 | -0,527121492 |
| A_23_P134454  | NM_001753        | CAV1           | caveolin 1, caveolae protein, 22kDa                           | ENST00000341049 | -0,527179616 |
| A_23_P40174   | NM_004994        | MMP9           | matrix metalloproteinase 9 (gelatinase B, 92kDa gelatinase, 1 | ENST00000545925 | -0,527215005 |
| A_21_P0006498 | THC2714876       | XLOC_007992    |                                                               |                 | -0,52725179  |
| A_21_P0014771 | XR_113070        | LOC100509105   | uncharacterized LOC100509105                                  |                 | -0,527276099 |

|               |                 |                |                                                              |                 |              |
|---------------|-----------------|----------------|--------------------------------------------------------------|-----------------|--------------|
| A_24_P399942  | NM_173694       | ATP11C         | ATPase, class VI, type 11C                                   | ENST00000450801 | -0,527590165 |
| A_21_P0010039 | THC2657240      | XLOC_013743    |                                                              |                 | -0,527596284 |
| A_23_P103070  | NM_003405       | YWHAH          | tyrosine 3-monooxygenase/tryptophan 5-monooxygenase $\alpha$ | ENST00000248975 | -0,527677161 |
| A_23_P33723   | NM_004244       | CD163          | CD163 molecule                                               | ENST00000396620 | -0,527752541 |
| A_24_P49517   | NM_138367       | ZNF251         | zinc finger protein 251                                      | ENST00000292562 | -0,527791676 |
| A_21_P0006876 | TCONS_00018215  | XLOC_008495    |                                                              |                 | -0,527805251 |
| A_21_P0000618 | NR_033965       | FLJ33065       | uncharacterized LOC440952                                    |                 | -0,527815027 |
| A_21_P0012748 | ENST00000515282 | XLOC_I2_010855 |                                                              | ENST00000515282 | -0,527833059 |
| A_23_P110791  | NM_005211       | CSF1R          | colony stimulating factor 1 receptor                         | ENST00000286301 | -0,527989046 |
| A_23_P374844  | NM_015973       | GAL            | galanin prepropeptide                                        | ENST00000265643 | -0,528046563 |
| A_23_P110791  | NM_005211       | CSF1R          | colony stimulating factor 1 receptor                         | ENST00000286301 | -0,528099783 |
| A_23_P71530   | NM_002546       | TNFRSF11B      | tumor necrosis factor receptor superfamily, member 11b       | ENST00000521597 | -0,528112004 |
| A_23_P122976  | NM_002069       | GNAI1          | guanine nucleotide binding protein (G protein), alpha inhibi | ENST00000351004 | -0,528353352 |
| A_32_P111306  | NR_027072       | LINC00189      | long intergenic non-protein coding RNA 189                   | ENST00000431661 | -0,528597132 |
| A_24_P228717  | NM_002872       | RAC2           | ras-related C3 botulinum toxin substrate 2 (rho family, smal | ENST00000441619 | -0,528629821 |
| A_21_P0012947 | ENST00000513175 | XLOC_I2_011692 |                                                              | ENST00000513175 | -0,528841235 |
| A_23_P105002  | NM_000327       | ROM1           | retinal outer segment membrane protein 1                     | ENST00000278833 | -0,528844717 |
| A_32_P356316  | NM_002119       | HLA-DOA        | major histocompatibility complex, class II, DO alpha         | ENST00000229829 | -0,528853827 |
| A_23_P168909  | NM_012082       | ZFPM2          | zinc finger protein, multitype 2                             | ENST00000407775 | -0,528892937 |
| A_33_P3382924 | NM_003118       | SPARC          | secreted protein, acidic, cysteine-rich (osteonectin)        | ENST00000231061 | -0,528912386 |
| A_21_P0010542 | ENST00000451023 | XLOC_I2_000342 |                                                              | ENST00000451023 | -0,528989875 |
| A_33_P3373358 | NM_005497       | GJC1           | gap junction protein, gamma 1, 45kDa                         | ENST00000330514 | -0,529297237 |
| A_24_P91852   | NM_006520       | DYNLT3         | dynein, light chain, Tctex-type 3                            | ENST00000378578 | -0,529495313 |
| A_21_P0011779 | AK090827        | LOC100506930   | uncharacterized LOC100506930                                 | ENST00000427868 | -0,52949564  |
| A_24_P307854  | NM_024963       | FBXL18         | F-box and leucine-rich repeat protein 18                     | ENST00000297035 | -0,529565457 |
| A_21_P0013858 | ENST00000449645 | TMLHE          | trimethyllysine hydroxylase, epsilon                         | ENST00000449645 | -0,529583132 |
| A_23_P11070   | NM_032553       | GPR174         | G protein-coupled receptor 174                               | ENST00000276077 | -0,52967924  |
| A_23_P389102  | NM_015194       | MYO1D          | myosin ID                                                    | ENST00000318217 | -0,529700512 |
| A_23_P108823  | NM_032523       | OSBPL6         | oxysterol binding protein-like 6                             | ENST00000315022 | -0,529748175 |

|                |                 |             |                                                                       |                 |              |
|----------------|-----------------|-------------|-----------------------------------------------------------------------|-----------------|--------------|
| A_33_P3341224  | NM_001170464    | CDK17       | cyclin-dependent kinase 17                                            | ENST00000261211 | -0,529820622 |
| A_23_P336554   | NM_134470       | IL1RAP      | interleukin 1 receptor accessory protein                              | ENST00000422485 | -0,529842754 |
| A_23_P71530    | NM_002546       | TNFRSF11B   | tumor necrosis factor receptor superfamily, member 11b                | ENST00000521597 | -0,529849789 |
| A_24_P54390    | NM_170672       | RASGRP3     | RAS guanyl releasing protein 3 (calcium and DAG-regulated)            | ENST00000407811 | -0,529851196 |
| A_23_P70387    | NM_006789       | APOBEC2     | apolipoprotein B mRNA editing enzyme, catalytic polypeptide           | ENST00000244669 | -0,529883803 |
| A_23_P374082   | NM_033274       | ADAM19      | ADAM metallopeptidase domain 19                                       | ENST00000257527 | -0,530086481 |
| A_19_P00803675 | XM_003403780    | ZDHHC11B    |                                                                       |                 | -0,530103676 |
| A_23_P148473   | NM_000206       | IL2RG       | interleukin 2 receptor, gamma                                         | ENST00000456850 | -0,530119466 |
| A_24_P149902   | NM_016169       | SUFU        | suppressor of fused homolog (Drosophila)                              | ENST00000471000 | -0,530433112 |
| A_21_P0006580  | THC2547329      | XLOC_008152 |                                                                       |                 | -0,530479464 |
| A_33_P3318122  | NM_020314       | C16orf62    | chromosome 16 open reading frame 62                                   | ENST00000251143 | -0,530501798 |
| A_23_P399864   | NM_001145346    | RBMXL3      | RNA binding motif protein, X-linked-like 3                            | ENST00000424776 | -0,530504164 |
| A_23_P133133   | NM_025144       | ALPK1       | alpha-kinase 1                                                        | ENST00000505127 | -0,530612218 |
| A_21_P0002252  | TCONS_00004838  | XLOC_001558 |                                                                       |                 | -0,530790234 |
| A_33_P3243449  | NM_001252       | CD70        | CD70 molecule                                                         | ENST00000245903 | -0,530829425 |
| A_23_P218626   | NM_080741       | NEU4        | sialidase 4                                                           | ENST00000472793 | -0,530939421 |
| A_19_P00322856 | NM_001145191    | FAM200B     |                                                                       | ENST00000502502 | -0,530951566 |
| A_24_P214598   | NM_152542       | PPM1K       | protein phosphatase, Mg <sup>2+</sup> /Mn <sup>2+</sup> dependent, 1K | ENST00000506423 | -0,531189695 |
| A_24_P321511   | NM_016072       | GOLT1B      | golgi transport 1B                                                    | ENST00000229314 | -0,531335559 |
| A_33_P3318530  | NR_015364       | LOC441204   | uncharacterized LOC441204                                             |                 | -0,531350486 |
| A_33_P3295358  | NM_139314       | ANGPTL4     | angiopoietin-like 4                                                   | ENST00000301455 | -0,531465336 |
| A_23_P259611   | NM_016616       | TXNDC3      | thioredoxin domain containing 3 (spermatozoa)                         | ENST00000476435 | -0,531517232 |
| A_21_P0001233  | ENST00000433058 | XLOC_001230 |                                                                       | ENST00000433058 | -0,531529854 |
| A_21_P0009336  | TCONS_00025700  | XLOC_012528 |                                                                       |                 | -0,53153999  |
| A_24_P942112   | AK001678        | POLR1B      | polymerase (RNA) I polypeptide B, 128kDa                              |                 | -0,53155356  |
| A_23_P121825   | NM_024941       | C5orf44     | chromosome 5 open reading frame 44                                    | ENST00000545191 | -0,531609366 |
| A_23_P121480   | NM_001004196    | CD200       | CD200 molecule                                                        | ENST00000478595 | -0,531655543 |
| A_23_P207003   | NM_004574       | Sep-04      | septin 4                                                              | ENST00000317268 | -0,531668116 |
| A_23_P105002   | NM_000327       | ROM1        | retinal outer segment membrane protein 1                              | ENST00000278833 | -0,531992384 |



|                |                  |                |                                                                |                 |              |
|----------------|------------------|----------------|----------------------------------------------------------------|-----------------|--------------|
| A_33_P3392892  | NM_017886        | ULK4           | unc-51-like kinase 4 (C. elegans)                              | ENST00000301831 | -0,532002809 |
| A_23_P34375    | NM_003196        | TCEA3          | transcription elongation factor A (SII), 3                     | ENST00000450454 | -0,532024051 |
| A_32_P234145   | NM_203349        | SHC4           | SHC (Src homology 2 domain containing) family, member 4        | ENST00000396535 | -0,532039944 |
| A_24_P64126    | NM_003909        | CPNE3          | copine III                                                     | ENST00000517490 | -0,532144909 |
| A_23_P20606    | NM_015469        | NIPSNAP3A      | nipsnap homolog 3A (C. elegans)                                | ENST00000374767 | -0,532163166 |
| A_21_P0010962  | TCONS_I2_0000434 | XLOC_I2_002204 |                                                                |                 | -0,532183309 |
| A_21_P0008721  | TCONS_00023628   | XLOC_011428    |                                                                |                 | -0,532187132 |
| A_19_P00315529 | AF088007         | XLOC_008370    |                                                                |                 | -0,532216332 |
| A_33_P3236798  | NM_080823        | SRMS           | src-related kinase lacking C-terminal regulatory tyrosine an   | ENST00000217188 | -0,532267884 |
| A_23_P317683   | NM_003274        | TRAPPC10       | trafficking protein particle complex 10                        | ENST00000291574 | -0,532439751 |
| A_23_P40174    | NM_004994        | MMP9           | matrix metalloproteinase 9 (gelatinase B, 92kDa gelatinase, ') | ENST00000545925 | -0,532447998 |
| A_21_P0012676  | NR_026575        | GK3P           | glycerol kinase 3 pseudogene                                   |                 | -0,532454838 |
| A_24_P943106   | NM_001080415     | U2SURP         | U2 snRNP-associated SURP domain containing                     | ENST00000473835 | -0,532542968 |
| A_21_P0012626  | BC032464         | XLOC_I2_010897 |                                                                |                 | -0,532563664 |
| A_24_P82957    | NM_018683        | RNF114         | ring finger protein 114                                        | ENST00000244061 | -0,532727119 |
| A_23_P306867   | NM_173199        | NR4A3          | nuclear receptor subfamily 4, group A, member 3                | ENST00000338488 | -0,532750208 |
| A_23_P369815   | NM_000639        | FASLG          | Fas ligand (TNF superfamily, member 6)                         | ENST00000367721 | -0,532796277 |
| A_23_P147431   | NM_002350        | LYN            | v-yes-1 Yamaguchi sarcoma viral related oncogene homolog       | ENST00000519728 | -0,532800615 |
| A_33_P3375140  | AK023946         | MCPH1          | microcephalin 1                                                |                 | -0,532955694 |
| A_33_P3336780  | NM_007188        | ABCB8          | ATP-binding cassette, sub-family B (MDR/TAP), member 8         | ENST00000358849 | -0,532965845 |
| A_19_P00322310 | NR_038303        | LOC100505702   | uncharacterized LOC100505702                                   |                 | -0,532990224 |
| A_23_P104025   | NM_052965        | TSEN15         | tRNA splicing endonuclease 15 homolog (S. cerevisiae)          | ENST00000462677 | -0,533024618 |
| A_24_P352952   | NM_017565        | FAM20A         | family with sequence similarity 20, member A                   | ENST00000375556 | -0,533041987 |
| A_23_P162766   | NM_015296        | DOCK9          | dedicator of cytokinesis 9                                     | ENST00000428223 | -0,533076088 |
| A_23_P358944   | NM_033244        | PML            | promyelocytic leukemia                                         | ENST00000435786 | -0,533111968 |
| A_33_P3239954  | NM_005151        | USP14          | ubiquitin specific peptidase 14 (tRNA-guanine transglycosyl)   | ENST00000261601 | -0,533160885 |
| A_33_P3213596  | NM_015028        | TNIK           | TRAF2 and NCK interacting kinase                               | ENST00000284483 | -0,533246395 |
| A_23_P121533   | NM_012445        | SPON2          | spondin 2, extracellular matrix protein                        | ENST00000431380 | -0,533399655 |
| A_19_P00804215 | NM_001145710     | LOC375190      | UPF0638 protein B                                              | ENST00000420135 | -0,533526625 |

|                |                 |               |                                                              |                 |              |
|----------------|-----------------|---------------|--------------------------------------------------------------|-----------------|--------------|
| A_23_P147431   | NM_002350       | LYN           | v-yes-1 Yamaguchi sarcoma viral related oncogene homolog     | ENST00000519728 | -0,53364608  |
| A_23_P201979   | NM_183013       | CREM          | cAMP responsive element modulator                            | ENST00000460270 | -0,53372315  |
| A_33_P3378659  | NM_001003799    | TARP          | TCR gamma alternate reading frame protein                    | ENST00000443402 | -0,533825607 |
| A_33_P3314176  | NM_017709       | FAM46C        | family with sequence similarity 46, member C                 | ENST00000369448 | -0,53389041  |
| A_21_P0007155  | ENST00000415809 | XLOC_009363   |                                                              | ENST00000415809 | -0,534084075 |
| A_23_P121533   | NM_012445       | SPON2         | spondin 2, extracellular matrix protein                      | ENST00000431380 | -0,53411203  |
| A_23_P7636     | NM_004219       | PTTG1         | pituitary tumor-transforming 1                               | ENST00000520452 | -0,534117023 |
| A_33_P3348782  | NM_030622       | CYP2S1        | cytochrome P450, family 2, subfamily S, polypeptide 1        | ENST00000301173 | -0,53428337  |
| A_23_P122976   | NM_002069       | GNAI1         | guanine nucleotide binding protein (G protein), alpha inhibi | ENST00000351004 | -0,534594241 |
| A_23_P52031    | NM_002633       | PGM1          | phosphoglucomutase 1                                         | ENST00000538673 | -0,534607106 |
| A_21_P0012673  | NM_015160       | PMPCA         | peptidase (mitochondrial processing) alpha                   | ENST00000444897 | -0,5346113   |
| A_23_P76799    | NM_013448       | BAZ1A         | bromodomain adjacent to zinc finger domain, 1A               | ENST00000360310 | -0,534681781 |
| A_21_P0000573  | NR_028595       | CCDC162P      | coiled-coil domain containing 162, pseudogene                | ENST00000422819 | -0,534741949 |
| A_33_P3369964  | NR_024612       | ATXN1L        | ataxin 1-like                                                |                 | -0,534821079 |
| A_19_P00318461 | ENST00000366424 | XLOC_001942   |                                                              | ENST00000366424 | -0,534888952 |
| A_23_P21473    | NM_024491       | CEP70         | centrosomal protein 70kDa                                    | ENST00000484888 | -0,534892199 |
| A_23_P103070   | NM_003405       | YWHAH         | tyrosine 3-monooxygenase/tryptophan 5-monooxygenase 2        | ENST00000248975 | -0,534908522 |
| A_19_P00320841 | NM_001113434    | C17orf51      | chromosome 17 open reading frame 51                          | ENST00000391411 | -0,5349719   |
| A_33_P3236881  | NM_001204088    | C1orf151-NBL1 | C1orf151-NBL1 readthrough                                    | ENST00000375136 | -0,534972092 |
| A_21_P0010421  | TCONS_00029614  | XLOC_014268   |                                                              |                 | -0,535294489 |
| A_23_P105535   | NM_172240       | POC1B         | POC1 centriolar protein homolog B (Chlamydomonas)            | ENST00000378528 | -0,535316768 |
| A_21_P0009159  | ENST00000436469 | XLOC_012116   |                                                              | ENST00000436469 | -0,535337446 |
| A_23_P116091   | NM_130443       | DPP3          | dipeptidyl-peptidase 3                                       | ENST00000543807 | -0,535372396 |
| A_23_P98350    | NM_001165       | BIRC3         | baculoviral IAP repeat containing 3                          | ENST00000263464 | -0,535448895 |
| A_23_P135271   | NM_001497       | B4GALT1       | UDP-Gal:betaGlcNAc beta 1,4- galactosyltransferase, polype   | ENST00000379731 | -0,535643416 |
| A_33_P3234571  | NM_145109       | MAP2K3        | mitogen-activated protein kinase kinase 3                    | ENST00000463192 | -0,535682168 |
| A_33_P3367889  | AK126078        | LOC100130657  | uncharacterized LOC100130657                                 |                 | -0,535780039 |
| A_33_P3397995  | NM_001130699    | IPCEF1        | interaction protein for cytohesin exchange factors 1         | ENST00000367220 | -0,535818116 |
| A_33_P3241591  | AK094219        | LOC100131864  | uncharacterized LOC100131864                                 |                 | -0,535965428 |

|               |                |              |                                                             |                 |              |
|---------------|----------------|--------------|-------------------------------------------------------------|-----------------|--------------|
| A_23_P76799   | NM_013448      | BAZ1A        | bromodomain adjacent to zinc finger domain, 1A              | ENST00000360310 | -0,536005103 |
| A_23_P139912  | NM_002178      | IGFBP6       | insulin-like growth factor binding protein 6                | ENST00000548176 | -0,536054698 |
| A_33_P3343210 | NM_016612      | SLC25A37     | solute carrier family 25, member 37                         | ENST00000519973 | -0,536087113 |
| A_32_P54274   | NM_000798      | DRD5         | dopamine receptor D5                                        | ENST00000304374 | -0,536263423 |
| A_24_P211565  | NM_031910      | C1QTNF6      | C1q and tumor necrosis factor related protein 6             | ENST00000493023 | -0,536396768 |
| A_33_P3385785 | NM_005621      | S100A12      | S100 calcium binding protein A12                            | ENST00000368736 | -0,536492625 |
| A_23_P200096  | NM_025106      | SPSB1        | splA/ryanodine receptor domain and SOCS box containing 1    | ENST00000377399 | -0,536499289 |
| A_23_P102117  | NM_025216      | WNT10A       | wingless-type MMTV integration site family, member 10A      | ENST00000258411 | -0,536537781 |
| A_23_P10025   | NM_006159      | NELL2        | NEL-like 2 (chicken)                                        | ENST00000437801 | -0,536657936 |
| A_23_P102471  | NM_000251      | MSH2         | mutS homolog 2, colon cancer, nonpolyposis type 1 (E. coli) | ENST00000543555 | -0,536671081 |
| A_23_P121533  | NM_012445      | SPON2        | spondin 2, extracellular matrix protein                     | ENST00000431380 | -0,536683135 |
| A_33_P3569068 | NM_003550      | MAD1L1       | MAD1 mitotic arrest deficient-like 1 (yeast)                | ENST00000265854 | -0,536738687 |
| A_33_P3415211 | NM_002437      | MPV17        | MpV17 mitochondrial inner membrane protein                  | ENST00000426513 | -0,536743504 |
| A_33_P3248265 | NM_002341      | LTB          | lymphotoxin beta (TNF superfamily, member 3)                | ENST00000376117 | -0,536788857 |
| A_33_P3418209 | NM_004791      | ITGBL1       | integrin, beta-like 1 (with EGF-like repeat domains)        | ENST00000376162 | -0,536798568 |
| A_33_P3235546 | NM_014747      | RIMS3        | regulating synaptic membrane exocytosis 3                   | ENST00000372683 | -0,536924506 |
| A_23_P46017   | NM_001008661   | CCBL2        | cysteine conjugate-beta lyase 2                             | ENST00000370485 | -0,536957126 |
| A_21_P0007549 | TCONS_00020398 | XLOC_009727  |                                                             |                 | -0,537004695 |
| A_23_P147431  | NM_002350      | LYN          | v-yes-1 Yamaguchi sarcoma viral related oncogene homolog    | ENST00000519728 | -0,537044625 |
| A_33_P3332018 | NM_006682      | FGL2         | fibrinogen-like 2                                           | ENST00000248598 | -0,537062085 |
| A_23_P108751  | NM_001039492   | FHL2         | four and a half LIM domains 2                               | ENST00000358129 | -0,537069503 |
| A_23_P207400  | NM_007300      | BRCA1        | breast cancer 1, early onset                                | ENST00000412061 | -0,537077056 |
| A_21_P0014183 | XR_108739      | LOC100505921 | uncharacterized LOC100505921                                | ENST00000451066 | -0,537122955 |
| A_23_P345081  | NM_001083956   | ZNF655       | zinc finger protein 655                                     | ENST00000424881 | -0,5372081   |
| A_23_P157875  | NM_002003      | FCN1         | ficolin (collagen/fibrinogen domain containing) 1           | ENST00000308299 | -0,53737267  |
| A_21_P0014458 | XR_109925      | LOC100506262 | uncharacterized LOC100506262                                |                 | -0,537396148 |
| A_33_P3486059 | AV653872       | C1orf195     | chromosome 1 open reading frame 195                         |                 | -0,537405061 |
| A_23_P10647   | NM_018659      | CYTL1        | cytokine-like 1                                             | ENST00000307746 | -0,537457943 |
| A_24_P261259  | NM_004566      | PFKFB3       | 6-phosphofructo-2-kinase/fructose-2,6-biphosphatase 3       | ENST00000379784 | -0,537482365 |

|               |                                 |                |                                                                |                 |              |
|---------------|---------------------------------|----------------|----------------------------------------------------------------|-----------------|--------------|
| A_24_P32085   | NM_024761                       | MOB3B          | MOB kinase activator 3B                                        | ENST00000262244 | -0,537771701 |
| A_33_P3372004 | NM_005849                       | IGSF6          | immunoglobulin superfamily, member 6                           | ENST00000268389 | -0,538004042 |
| A_23_P258393  | NM_144641                       | PPM1M          | protein phosphatase, Mg2+/Mn2+ dependent, 1M                   | ENST00000323588 | -0,538016536 |
| A_32_P74366   | ENST00000310421                 | VCPIP1         | valosin containing protein (p97)/p47 complex interacting pr    | ENST00000310421 | -0,538057907 |
| A_23_P147431  | NM_002350                       | LYN            | v-yes-1 Yamaguchi sarcoma viral related oncogene homolog       | ENST00000519728 | -0,538069408 |
| A_33_P3240512 | NM_138444                       | KCTD12         | potassium channel tetramerisation domain containing 12         | ENST00000377474 | -0,538172692 |
| A_33_P3447441 | AL713660                        | LOC202025      | uncharacterized LOC202025                                      |                 | -0,538224408 |
| A_33_P3221313 | NM_006733                       | CENPI          | centromere protein I                                           | ENST00000423383 | -0,53833469  |
| A_33_P3413989 | NM_000062                       | SERPING1       | serpin peptidase inhibitor, clade G (C1 inhibitor), member 1   | ENST00000405496 | -0,538404714 |
| A_24_P49447   | NM_020829                       | KIAA1432       | KIAA1432                                                       | ENST00000418622 | -0,538498708 |
| A_23_P138776  | NM_001610                       | ACP2           | acid phosphatase 2, lysosomal                                  | ENST00000525230 | -0,538531492 |
| A_23_P39840   | NM_006634                       | VAMP5          | vesicle-associated membrane protein 5 (myobrevin)              | ENST00000306384 | -0,538610643 |
| A_24_P928510  | NM_053055                       | THEM4          | thioesterase superfamily member 4                              | ENST00000368814 | -0,538699597 |
| A_33_P3307903 | NM_005192                       | CDKN3          | cyclin-dependent kinase inhibitor 3                            | ENST00000216414 | -0,538744242 |
| A_23_P147431  | NM_002350                       | LYN            | v-yes-1 Yamaguchi sarcoma viral related oncogene homolog       | ENST00000519728 | -0,53877366  |
| A_21_P0012539 | ENST00000436687                 | XLOC_I2_010226 |                                                                | ENST00000436687 | -0,538885982 |
| A_23_P145529  | NM_181795                       | PKIB           | protein kinase (cAMP-dependent, catalytic) inhibitor beta      | ENST00000368446 | -0,539141146 |
| A_23_P166280  | ENST00000407780                 | ICOSLG         | inducible T-cell co-stimulator ligand                          | ENST00000407780 | -0,539166152 |
| A_21_P0013470 | NR_027425                       | FAM66D         | family with sequence similarity 66, member D                   | ENST00000434078 | -0,539263578 |
| A_21_P0010298 | TCONS_00029173                  | XLOC_014112    |                                                                |                 | -0,539305692 |
| A_24_P658584  | NM_015278                       | SASH1          | SAM and SH3 domain containing 1                                | ENST00000367467 | -0,539325592 |
| A_23_P433369  | NM_015473                       | HEATR5A        | HEAT repeat containing 5A                                      | ENST00000389961 | -0,539367162 |
| A_21_P0000827 | NR_038894                       | LOC100506428   | uncharacterized LOC100506428                                   |                 | -0,539377425 |
| A_33_P3242543 | NM_000240                       | MAOA           | monoamine oxidase A                                            | ENST00000338702 | -0,539400818 |
| A_23_P40174   | NM_004994                       | MMP9           | matrix metalloproteinase 9 (gelatinase B, 92kDa gelatinase, ') | ENST00000545925 | -0,539418748 |
| A_23_P105535  | NM_172240                       | POC1B          | POC1 centriolar protein homolog B (Chlamydomonas)              | ENST00000378528 | -0,539728673 |
| A_33_P3330264 | NM_001511                       | CXCL1          | chemokine (C-X-C motif) ligand 1 (melanoma growth stimulat     | ENST00000395761 | -0,53977514  |
| A_33_P3411145 | NM_001145191                    | FAM200B        | family with sequence similarity 200, member B                  | ENST00000504137 | -0,539859389 |
| A_21_P0013034 | TCONS_I2_0002437(XLOC_I2_012678 |                |                                                                |                 | -0,539866528 |

|               |                 |              |                                                                        |                 |              |
|---------------|-----------------|--------------|------------------------------------------------------------------------|-----------------|--------------|
| A_23_P105002  | NM_000327       | ROM1         | retinal outer segment membrane protein 1                               | ENST00000278833 | -0,539870425 |
| A_32_P91042   | NR_027406       | LOC100129034 | uncharacterized LOC100129034                                           |                 | -0,539981396 |
| A_24_P342807  | NM_017964       | SLC30A6      | solute carrier family 30 (zinc transporter), member 6                  | ENST00000435660 | -0,540043283 |
| A_23_P58321   | NM_001237       | CCNA2        | cyclin A2                                                              | ENST00000274026 | -0,540113399 |
| A_21_P0014653 | XR_110911       | LOC100507521 | uncharacterized LOC100507521                                           | ENST00000524942 | -0,540120827 |
| A_33_P3409099 | NM_000332       | ATXN1        | ataxin 1                                                               | ENST00000450222 | -0,540134565 |
| A_24_P349965  | NM_007109       | TCF19        | transcription factor 19                                                | ENST00000400401 | -0,540180673 |
| A_24_P386746  | NM_031491       | RBP5         | retinol binding protein 5, cellular                                    | ENST00000543045 | -0,540195702 |
| A_23_P410110  | NM_001039380    | C10orf25     | chromosome 10 open reading frame 25                                    | ENST00000298298 | -0,540214927 |
| A_24_P117323  | NM_032775       | KLHL22       | kelch-like 22 (Drosophila)                                             | ENST00000440659 | -0,540232598 |
| A_21_P0006788 | XR_110454       | LOC100505869 | uncharacterized LOC100505869                                           | ENST00000435434 | -0,540309184 |
| A_33_P3235213 | NM_173799       | TIGIT        | T cell immunoreceptor with Ig and ITIM domains                         | ENST00000485814 | -0,540335568 |
| A_23_P147431  | NM_002350       | LYN          | v-yes-1 Yamaguchi sarcoma viral related oncogene homolog               | ENST00000519728 | -0,540347457 |
| A_23_P12082   | NM_001025199    | CHI3L2       | chitinase 3-like 2                                                     | ENST00000369748 | -0,540400768 |
| A_23_P155989  | NM_022145       | CENPK        | centromere protein K                                                   | ENST00000242872 | -0,54053055  |
| A_23_P423237  | NM_000231       | SGCG         | sarcoglycan, gamma (35kDa dystrophin-associated glycoprotein)          | ENST00000537476 | -0,540580952 |
| A_23_P122724  | NM_004665       | VNN2         | vanin 2                                                                | ENST00000392389 | -0,540616716 |
| A_24_P314571  | AK075287        | SPC24        | SPC24, NDC80 kinetochore complex component, homolog (S. cerevisiae)    |                 | -0,540640666 |
| A_33_P3273474 | NM_001765       | CD1C         | CD1c molecule                                                          | ENST00000368169 | -0,540674204 |
| A_33_P3372332 | NM_000101       | CYBA         | cytochrome b-245, alpha polypeptide                                    | ENST00000261623 | -0,540836145 |
| A_33_P3213064 | NM_005419       | STAT2        | signal transducer and activator of transcription 2, 113kDa             | ENST00000556539 | -0,540841145 |
| A_21_P0004701 | ENST00000448126 | XLOC_005527  |                                                                        | ENST00000448126 | -0,541026214 |
| A_23_P147431  | NM_002350       | LYN          | v-yes-1 Yamaguchi sarcoma viral related oncogene homolog               | ENST00000519728 | -0,541167553 |
| A_23_P258612  | NM_016529       | ATP8A2       | ATPase, aminophospholipid transporter, class I, type 8A, mitochondrial | ENST00000544544 | -0,541173453 |
| A_23_P55990   | NM_003827       | NAPA         | N-ethylmaleimide-sensitive factor attachment protein, alpha            | ENST00000263354 | -0,541212484 |
| A_23_P212617  | NM_003234       | TFRC         | transferrin receptor (p90, CD71)                                       | ENST00000392396 | -0,541303332 |
| A_23_P121533  | NM_012445       | SPON2        | spondin 2, extracellular matrix protein                                | ENST00000431380 | -0,541441903 |
| A_24_P64039   | NM_006803       | AP3M2        | adaptor-related protein complex 3, mu 2 subunit                        | ENST00000518421 | -0,541459129 |
| A_23_P70719   | NM_000426       | LAMA2        | laminin, alpha 2                                                       | ENST00000443169 | -0,541503693 |



|               |                 |              |                                                                |                 |              |
|---------------|-----------------|--------------|----------------------------------------------------------------|-----------------|--------------|
| A_23_P97402   | NM_020439       | CAMK1G       | calcium/calmodulin-dependent protein kinase IG                 | ENST00000009105 | -0,541564151 |
| A_23_P40174   | NM_004994       | MMP9         | matrix metalloproteinase 9 (gelatinase B, 92kDa gelatinase, ') | ENST00000545925 | -0,541570652 |
| A_23_P147431  | NM_002350       | LYN          | v-yes-1 Yamaguchi sarcoma viral related oncogene homolog       | ENST00000519728 | -0,5416571   |
| A_33_P3418394 | NM_004707       | ATG12        | ATG12 autophagy related 12 homolog (S. cerevisiae)             | ENST00000509910 | -0,54165986  |
| A_23_P121533  | NM_012445       | SPON2        | spondin 2, extracellular matrix protein                        | ENST00000431380 | -0,5416737   |
| A_24_P916496  | NM_002737       | PRKCA        | protein kinase C, alpha                                        |                 | -0,541751625 |
| A_33_P3294911 | AK095383        | C12orf66     | chromosome 12 open reading frame 66                            | ENST00000311915 | -0,54185446  |
| A_23_P407565  | NM_001337       | CX3CR1       | chemokine (C-X3-C motif) receptor 1                            | ENST00000541347 | -0,542065507 |
| A_33_P3318509 | NM_014358       | CLEC4E       | C-type lectin domain family 4, member E                        | ENST00000299663 | -0,542151229 |
| A_23_P104876  | NM_017425       | SPA17        | sperm autoantigenic protein 17                                 | ENST00000524614 | -0,542194714 |
| A_24_P237486  | NM_004992       | MECP2        | methyl CpG binding protein 2 (Rett syndrome)                   | ENST00000545451 | -0,542204541 |
| A_33_P3376264 | ENST00000378938 | GK           | glycerol kinase                                                | ENST00000378938 | -0,542221752 |
| A_21_P0003772 | TCONS_00008581  | XLOC_004091  |                                                                |                 | -0,542234882 |
| A_33_P3217819 | NM_057749       | CCNE2        | cyclin E2                                                      | ENST00000542725 | -0,542379564 |
| A_23_P165598  | NM_001017920    | DAPL1        | death associated protein-like 1                                | ENST00000309950 | -0,542420961 |
| A_23_P76799   | NM_013448       | BAZ1A        | bromodomain adjacent to zinc finger domain, 1A                 | ENST00000360310 | -0,542475763 |
| A_23_P17844   | NM_002854       | PVALB        | parvalbumin                                                    | ENST00000404171 | -0,542524287 |
| A_33_P3214550 | NM_001557       | CXCR2        | chemokine (C-X-C motif) receptor 2                             | ENST00000318507 | -0,542705189 |
| A_24_P233786  | NM_052966       | FAM129A      | family with sequence similarity 129, member A                  | ENST00000367511 | -0,542728801 |
| A_23_P26954   | NM_006373       | VAT1         | vesicle amine transport protein 1 homolog (T. californica)     | ENST00000542468 | -0,542808008 |
| A_23_P76102   | NM_005811       | GDF11        | growth differentiation factor 11                               | ENST00000546799 | -0,542836859 |
| A_23_P203665  | NM_018367       | ACER3        | alkaline ceramidase 3                                          | ENST00000544113 | -0,542925856 |
| A_23_P19510   | NM_001198858    | HLA-DQB2     | major histocompatibility complex, class II, DQ beta 2          | ENST00000416131 | -0,542934906 |
| A_33_P3225091 | NM_004756       | NUMBL        | numb homolog (Drosophila)-like                                 | ENST00000252891 | -0,54312694  |
| A_33_P3356517 | XR_132698       | LOC100652764 | uncharacterized LOC100652764                                   | ENST00000435388 | -0,543223259 |
| A_33_P3319760 | NM_003564       | TAGLN2       | transgelin 2                                                   | ENST00000397334 | -0,543229066 |
| A_33_P3340404 | NM_144643       | SCLT1        | sodium channel and clathrin linker 1                           | ENST00000506233 | -0,543333588 |
| A_23_P119778  | NM_020342       | SLC39A10     | solute carrier family 39 (zinc transporter), member 10         | ENST00000409086 | -0,543490741 |
| A_33_P3371588 | NM_023934       | FUNDC2       | FUN14 domain containing 2                                      | ENST00000369498 | -0,543609596 |

|                |                 |                |                                                                |                 |              |
|----------------|-----------------|----------------|----------------------------------------------------------------|-----------------|--------------|
| A_23_P118254   | NM_001451       | FOXF1          | forkhead box F1                                                | ENST00000262426 | -0,543712743 |
| A_33_P3229678  | XM_003119812    | LOC100509378   | uncharacterized LOC100509378                                   |                 | -0,543730787 |
| A_23_P76799    | NM_013448       | BAZ1A          | bromodomain adjacent to zinc finger domain, 1A                 | ENST00000360310 | -0,543775029 |
| A_23_P112846   | NM_001144978    | MTHFD2L        | methylenetetrahydrofolate dehydrogenase (NADP+ depend          | ENST00000492183 | -0,543924646 |
| A_23_P365412   | NM_181644       | MFSD4          | major facilitator superfamily domain containing 4              | ENST00000367147 | -0,543928909 |
| A_19_P00320056 | NR_024052       | HCG18          | HLA complex group 18 (non-protein coding)                      | ENST00000426671 | -0,543978107 |
| A_21_P0012964  | ENST00000504512 | XLOC_I2_011854 |                                                                | ENST00000504512 | -0,544013006 |
| A_24_P410797   | AK125979        | KALRN          | kalirin, RhoGEF kinase                                         | ENST00000393496 | -0,544105731 |
| A_24_P944144   | NM_080797       | DIDO1          | death inducer-obliterator 1                                    | ENST00000395335 | -0,544148867 |
| A_24_P295806   | NM_023947       | CHID1          | chitinase domain containing 1                                  | ENST00000528426 | -0,544308065 |
| A_23_P501985   | NM_172249       | CSF2RA         | colony stimulating factor 2 receptor, alpha, low-affinity (gra | ENST00000419094 | -0,544366787 |
| A_23_P171107   | NM_033031       | CCNB3          | cyclin B3                                                      | ENST00000376042 | -0,544406482 |
| A_23_P425752   | NM_033219       | TRIM14         | tripartite motif containing 14                                 | ENST00000342043 | -0,544507586 |
| A_23_P88731    | NM_002875       | RAD51          | RAD51 homolog (S. cerevisiae)                                  | ENST00000525066 | -0,544620821 |
| A_33_P3384988  | NM_024055       | SLC30A5        | solute carrier family 30 (zinc transporter), member 5          | ENST00000380860 | -0,544638152 |
| A_33_P3401093  | NM_174899       | FBXO36         | F-box protein 36                                               | ENST00000283946 | -0,544648131 |
| A_21_P0011264  | ENST00000554945 | XLOC_I2_004371 |                                                                | ENST00000554945 | -0,544652834 |
| A_23_P104741   | NM_032531       | KIRREL3        | kin of IRRE like 3 (Drosophila)                                | ENST00000525144 | -0,544697873 |
| A_23_P113471   | NM_174912       | FAAH2          | fatty acid amide hydrolase 2                                   | ENST00000491179 | -0,544701185 |
| A_21_P0013579  | AK311167        | LOC100132352   | FSHD region gene 1 pseudogene                                  | ENST00000446984 | -0,544730649 |
| A_23_P76799    | NM_013448       | BAZ1A          | bromodomain adjacent to zinc finger domain, 1A                 | ENST00000360310 | -0,544771954 |
| A_23_P207400   | NM_007300       | BRCA1          | breast cancer 1, early onset                                   | ENST00000412061 | -0,544849481 |
| A_21_P0009773  | TCONS_00027385  | XLOC_013370    |                                                                |                 | -0,544871111 |
| A_33_P3404014  | NM_001013646    | C20orf107      | chromosome 20 open reading frame 107                           | ENST00000371325 | -0,5450808   |
| A_33_P3753757  | AK095652        | LOC158402      | uncharacterized LOC158402                                      |                 | -0,545105269 |
| A_23_P904      | NM_024603       | BEND5          | BEN domain containing 5                                        | ENST00000294347 | -0,545128904 |
| A_21_P0011331  | NM_001897       | CSPG4          | chondroitin sulfate proteoglycan 4                             | ENST00000308508 | -0,54513336  |
| A_33_P3267844  | NM_001004757    | OR51Q1         | olfactory receptor, family 51, subfamily Q, member 1           | ENST00000300778 | -0,545156707 |
| A_33_P3409477  | NM_032873       | UBASH3B        | ubiquitin associated and SH3 domain containing B               | ENST00000284273 | -0,545219133 |

|                |                  |                |                                                                |                 |              |
|----------------|------------------|----------------|----------------------------------------------------------------|-----------------|--------------|
| A_33_P3326917  | NM_001014440     | ODF3B          | outer dense fiber of sperm tails 3B                            | ENST00000329363 | -0,545505582 |
| A_21_P0013309  | TCONS_I2_0002659 | XLOC_I2_013848 |                                                                |                 | -0,54565769  |
| A_33_P3260445  | ENST00000367088  | DYNLT1         | dynein, light chain, Tctex-type 1                              | ENST00000367088 | -0,546000241 |
| A_23_P204947   | NM_004004        | GJB2           | gap junction protein, beta 2, 26kDa                            | ENST00000382844 | -0,546138604 |
| A_21_P0009466  | DB516369         | XLOC_012642    |                                                                |                 | -0,546216547 |
| A_23_P85453    | NM_016382        | CD244          | CD244 molecule, natural killer cell receptor 2B4               | ENST00000368034 | -0,54638511  |
| A_24_P328872   | NM_012073        | CCT5           | chaperonin containing TCP1, subunit 5 (epsilon)                | ENST00000280326 | -0,546388965 |
| A_19_P00320471 | NR_015375        | FLJ35024       | uncharacterized LOC401491                                      |                 | -0,546412329 |
| A_33_P3415097  | NM_001830        | CLCN4          | chloride channel 4                                             | ENST00000380833 | -0,546451778 |
| A_33_P3253807  | NM_001806        | CEBPG          | CCAAT/enhancer binding protein (C/EBP), gamma                  | ENST00000284000 | -0,546457146 |
| A_23_P147431   | NM_002350        | LYN            | v-yes-1 Yamaguchi sarcoma viral related oncogene homolog       | ENST00000519728 | -0,546520775 |
| A_23_P109785   | NM_003889        | NR1I2          | nuclear receptor subfamily 1, group I, member 2                | ENST00000493757 | -0,546664471 |
| A_21_P0002645  | ENST00000431336  | XLOC_001964    |                                                                | ENST00000431336 | -0,546818208 |
| A_21_P0000662  | NR_036537        | LOC100131320   | uncharacterized LOC100131320                                   | ENST00000412425 | -0,546884411 |
| A_33_P3258041  | NM_001037277     | GGPS1          | geranylgeranyl diphosphate synthase 1                          | ENST00000358966 | -0,547013071 |
| A_23_P103775   | NM_032270        | LRRRC8C        | leucine rich repeat containing 8 family, member C              | ENST00000370454 | -0,547118708 |
| A_23_P101246   | NM_001163922     | VSIG10L        | V-set and immunoglobulin domain containing 10 like             | ENST00000335624 | -0,547122869 |
| A_23_P212617   | NM_003234        | TFRC           | transferrin receptor (p90, CD71)                               | ENST00000392396 | -0,547167522 |
| A_33_P3359027  | NM_001144872     | CCDC42B        | coiled-coil domain containing 42B                              | ENST00000551256 | -0,547220425 |
| A_33_P3237135  | NM_004530        | MMP2           | matrix metalloproteinase 2 (gelatinase A, 72kDa gelatinase,    | ENST00000437642 | -0,547392711 |
| A_21_P0010193  | ENST00000465390  | XLOC_014036    |                                                                | ENST00000465390 | -0,547476852 |
| A_23_P103588   | NM_005518        | HMGCS2         | 3-hydroxy-3-methylglutaryl-CoA synthase 2 (mitochondrial)      | ENST00000544913 | -0,547861292 |
| A_23_P390518   | NM_003839        | TNFRSF11A      | tumor necrosis factor receptor superfamily, member 11a, N      | ENST00000382790 | -0,547889954 |
| A_21_P0005747  | ENST00000523572  | XLOC_006892    |                                                                | ENST00000523572 | -0,548049645 |
| A_32_P206839   | NR_037631        | LOC100288911   | uncharacterized LOC100288911                                   |                 | -0,548095744 |
| A_23_P121222   | NM_020165        | RAD18          | RAD18 homolog ( <i>S. cerevisiae</i> )                         | ENST00000264926 | -0,548173199 |
| A_33_P3354514  | BC047507         | SLC2A13        | solute carrier family 2 (facilitated glucose transporter), mem | ENST00000380858 | -0,548257504 |
| A_23_P501435   | NM_020536        | CSRP2BP        | CSRP2 binding protein                                          | ENST00000278816 | -0,548422945 |
| A_33_P3236030  | ENST00000509709  | ARHGAP24       | Rho GTPase activating protein 24                               | ENST00000509709 | -0,548450822 |

|               |                  |                |                                                                      |                 |              |
|---------------|------------------|----------------|----------------------------------------------------------------------|-----------------|--------------|
| A_23_P82523   | NM_000927        | ABCB1          | ATP-binding cassette, sub-family B (MDR/TAP), member 1               | ENST00000475929 | -0,548876733 |
| A_23_P114466  | NM_033284        | TBL1Y          | transducin (beta)-like 1, Y-linked                                   | ENST00000383032 | -0,548935211 |
| A_21_P0009339 | TCONS_00025704   | XLOC_012530    |                                                                      |                 | -0,548935759 |
| A_23_P206293  | NM_153837        | GPR114         | G protein-coupled receptor 114                                       | ENST00000340339 | -0,549008092 |
| A_23_P103864  | NM_024525        | TTC13          | tetratricopeptide repeat domain 13                                   | ENST00000414259 | -0,549008503 |
| A_33_P3403075 | NM_018304        | PRR11          | proline rich 11                                                      | ENST00000262293 | -0,549225847 |
| A_32_P342064  | NM_002032        | FTH1           | ferritin, heavy polypeptide 1                                        | ENST00000534180 | -0,54931398  |
| A_23_P169003  | NM_022071        | SH2D4A         | SH2 domain containing 4A                                             | ENST00000519207 | -0,549392525 |
| A_23_P119337  | NM_012068        | ATF5           | activating transcription factor 5                                    | ENST00000423777 | -0,549486085 |
| A_32_P170444  | NM_006713        | SUB1           | SUB1 homolog (S. cerevisiae)                                         | ENST00000265073 | -0,549517616 |
| A_21_P0005781 | TCONS_00014898   | XLOC_006971    |                                                                      |                 | -0,549624545 |
| A_23_P11800   | NM_018584        | CAMK2N1        | calcium/calmodulin-dependent protein kinase II inhibitor 1           | ENST00000375078 | -0,549677551 |
| A_24_P263653  | NM_004946        | DOCK2          | dedicator of cytokinesis 2                                           | ENST00000343291 | -0,549678954 |
| A_21_P0011985 | TCONS_I2_0001506 | XLOC_I2_008405 |                                                                      |                 | -0,549754453 |
| A_24_P220454  | NM_181552        | CUX1           | cut-like homeobox 1                                                  | ENST00000360264 | -0,549787947 |
| A_23_P382045  | NM_020245        | TULP4          | tubby like protein 4                                                 | ENST00000367097 | -0,549813232 |
| A_33_P3243907 | NM_001909        | CTSD           | cathepsin D                                                          | ENST00000433655 | -0,550051892 |
| A_23_P147431  | NM_002350        | LYN            | v-src tyrosine kinase                                                | ENST00000519728 | -0,550070702 |
| A_23_P109171  | NM_001195        | BFSP1          | beaded filament structural protein 1, filensin                       | ENST00000536626 | -0,550109521 |
| A_23_P14165   | NM_005292        | GPR18          | G protein-coupled receptor 18                                        | ENST00000340807 | -0,550187272 |
| A_33_P3285639 | NM_025244        | TSGA10         | testis specific, 10                                                  | ENST00000393482 | -0,55028027  |
| A_33_P3368334 | ENST00000368186  | FCRL3          | Fc receptor-like 3                                                   | ENST00000368186 | -0,550280914 |
| A_24_P597190  | NR_027503        | LOC100133050   | glucuronidase, beta pseudogene                                       |                 | -0,550449784 |
| A_24_P156501  | NM_024007        | EBF1           | early B-cell factor 1                                                | ENST00000522192 | -0,550534767 |
| A_32_P47754   | ENST00000431042  | SLC2A14        | solute carrier family 2 (facilitated glucose transporter), member 14 | ENST00000431042 | -0,550544394 |
| A_33_P3310989 | NM_014847        | UBAP2L         | ubiquitin associated protein 2-like                                  | ENST00000433006 | -0,550609201 |
| A_23_P420256  | NM_021925        | C2orf43        | chromosome 2 open reading frame 43                                   | ENST00000237822 | -0,550634405 |
| A_24_P636882  | NM_004226        | STK17B         | serine/threonine kinase 17b                                          | ENST00000263955 | -0,550976363 |
| A_33_P3312985 | XR_109694        | C22orf37       | chromosome 22 open reading frame 37                                  |                 | -0,550998986 |

|                |                  |                |                                                                            |                 |  |              |
|----------------|------------------|----------------|----------------------------------------------------------------------------|-----------------|--|--------------|
| A_21_P0008363  | TCONS_00022575   | XLOC_010891    |                                                                            |                 |  | -0,55108234  |
| A_23_P103070   | NM_003405        | YWHAH          | tyrosine 3-monooxygenase/tryptophan 5-monooxygenase                        | ENST00000248975 |  | -0,551197689 |
| A_23_P54929    | NM_020424        | LYRM1          | LYR motif containing 1                                                     | ENST00000219168 |  | -0,551253591 |
| A_23_P216655   | NM_014788        | TRIM14         | tripartite motif containing 14                                             | ENST00000341469 |  | -0,551266741 |
| A_23_P121657   | NM_005114        | HS3ST1         | heparan sulfate (glucosamine) 3-O-sulfotransferase 1                       | ENST00000002596 |  | -0,55135242  |
| A_33_P3380457  | NM_022049        | GPR88          | G protein-coupled receptor 88                                              | ENST00000315033 |  | -0,551359131 |
| A_24_P944991   | NM_173829        | SREK1IP1       | SREK1-interacting protein 1                                                | ENST00000513458 |  | -0,55154066  |
| A_33_P3332302  | NR_027025        | MTVR2          | mouse mammary tumor virus receptor homolog 2                               |                 |  | -0,551887642 |
| A_23_P18078    | NM_002888        | RARRES1        | retinoic acid receptor responder (tazarotene induced) 1                    | ENST00000498640 |  | -0,551983723 |
| A_23_P114084   | NM_000444        | PHEX           | phosphate regulating endopeptidase homolog, X-linked                       | ENST00000537599 |  | -0,551997252 |
| A_21_P0010697  | NR_023918        | LINC00339      | long intergenic non-protein coding RNA 339                                 |                 |  | -0,552032856 |
| A_23_P105535   | NM_172240        | POC1B          | POC1 centriolar protein homolog B (Chlamydomonas)                          | ENST00000378528 |  | -0,552239785 |
| A_33_P3274501  | NM_016523        | KLRF1          | killer cell lectin-like receptor subfamily F, member 1                     | ENST00000545196 |  | -0,552290594 |
| A_23_P30666    | NM_014452        | TNFRSF21       | tumor necrosis factor receptor superfamily, member 21                      | ENST00000419206 |  | -0,552625968 |
| A_24_P183150   | NM_002090        | CXCL3          | chemokine (C-X-C motif) ligand 3                                           | ENST00000296026 |  | -0,552842812 |
| A_23_P99292    | NM_006479        | RAD51AP1       | RAD51 associated protein 1                                                 | ENST00000535558 |  | -0,55287732  |
| A_23_P361544   | NM_173815        | CES4A          | carboxylesterase 4A                                                        | ENST00000544478 |  | -0,553001201 |
| A_24_P341187   | NM_020944        | GBA2           | glucosidase, beta (bile acid) 2                                            | ENST00000488292 |  | -0,553085149 |
| A_24_P20032    | NM_000449        | RFX5           | regulatory factor X, 5 (influences HLA class II expression)                | ENST00000290524 |  | -0,553124887 |
| A_24_P387609   | NM_030940        | ISCA1          | iron-sulfur cluster assembly 1 homolog (S. cerevisiae)                     | ENST00000375991 |  | -0,553179524 |
| A_19_P00320343 | ENST00000523946  | XLOC_007052    | 0                                                                          | ENST00000523946 |  | -0,553188162 |
| A_23_P113701   | NM_002607        | PDGFA          | platelet-derived growth factor alpha polypeptide                           | ENST00000402802 |  | -0,553270775 |
| A_33_P3233906  | NM_005855        | RAMP1          | receptor (G protein-coupled) activity modifying protein 1                  | ENST00000254661 |  | -0,553314767 |
| A_33_P3267186  | NM_001682        | ATP2B1         | ATPase, Ca <sup>++</sup> transporting, plasma membrane 1                   | ENST00000428670 |  | -0,553353225 |
| A_24_P216421   | NM_033148        | DTNB           | dystrobrevin, beta                                                         | ENST00000535791 |  | -0,553355649 |
| A_23_P72077    | NM_001559        | IL12RB2        | interleukin 12 receptor, beta 2                                            | ENST00000262345 |  | -0,55361713  |
| A_21_P0014777  | XR_132554        | LOC100652850   | uncharacterized LOC100652850                                               |                 |  | -0,553641948 |
| A_32_P41026    | NM_001024956     | SC5DL          | sterol-C5-desaturase (ERG3 delta-5-desaturase homolog, S. cerevisiae)-like |                 |  | -0,553791138 |
| A_21_P0011709  | TCONS_I2_0001268 | XLOC_I2_006812 |                                                                            |                 |  | -0,553969077 |



|               |                 |             |                                                                                    |                 |              |
|---------------|-----------------|-------------|------------------------------------------------------------------------------------|-----------------|--------------|
| A_23_P24616   | NM_170601       | SIAE        | sialic acid acetyltransferase                                                      | ENST00000545756 | -0,554110603 |
| A_21_P0001336 | ENST00000479252 | LRRC8C      | leucine rich repeat containing 8 family, member C                                  | ENST00000479252 | -0,554111846 |
| A_23_P101871  | NM_024907       | FBXO17      | F-box protein 17                                                                   | ENST00000292852 | -0,554179891 |
| A_23_P209735  | NM_025139       | ARMC9       | armadillo repeat containing 9                                                      | ENST00000349938 | -0,554484352 |
| A_24_P82106   | NM_004995       | MMP14       | matrix metalloproteinase 14 (membrane-inserted)                                    | ENST00000311852 | -0,554532692 |
| A_23_P145096  | NM_005084       | PLA2G7      | phospholipase A2, group VII (platelet-activating factor acetyltransferase)         | ENST00000537365 | -0,554549241 |
| A_23_P114466  | NM_033284       | TBL1Y       | transducin (beta)-like 1, Y-linked                                                 | ENST00000383032 | -0,554595613 |
| A_33_P3405424 | NM_172374       | IL4I1       | interleukin 4 induced 1                                                            | ENST00000341114 | -0,5546694   |
| A_23_P106362  | NM_020980       | AQP9        | aquaporin 9                                                                        | ENST00000219919 | -0,554839667 |
| A_23_P58266   | NM_005980       | S100P       | S100 calcium binding protein P                                                     | ENST00000296370 | -0,555044098 |
| A_33_P3277913 | ENST00000392193 | MAP2        | microtubule-associated protein 2                                                   | ENST00000392193 | -0,555083908 |
| A_23_P121533  | NM_012445       | SPON2       | spondin 2, extracellular matrix protein                                            | ENST00000431380 | -0,555150708 |
| A_23_P206806  | NM_002209       | ITGAL       | integrin, alpha L (antigen CD11A (p180), lymphocyte function-associated antigen 1) | ENST00000356798 | -0,555152116 |
| A_23_P212617  | NM_003234       | TFRC        | transferrin receptor (p90, CD71)                                                   | ENST00000392396 | -0,5554207   |
| A_23_P212617  | NM_003234       | TFRC        | transferrin receptor (p90, CD71)                                                   | ENST00000392396 | -0,555523462 |
| A_23_P108823  | NM_032523       | OSBPL6      | oxysterol binding protein-like 6                                                   | ENST00000315022 | -0,555630408 |
| A_24_P293530  | NM_178033       | CYP4X1      | cytochrome P450, family 4, subfamily X, polypeptide 1                              | ENST00000538609 | -0,555645572 |
| A_23_P107421  | NM_003258       | TK1         | thymidine kinase 1, soluble                                                        | ENST00000405273 | -0,555666244 |
| A_23_P85693   | NM_004120       | GBP2        | guanylate binding protein 2, interferon-inducible                                  | ENST00000463660 | -0,555744914 |
| A_33_P3350703 | NM_019891       | ERO1LB      | ERO1-like beta ( <i>S. cerevisiae</i> )                                            | ENST00000354619 | -0,555783554 |
| A_23_P110184  | NM_006745       | MSMO1       | methylsterol monooxygenase 1                                                       | ENST00000393766 | -0,555840135 |
| A_23_P210176  | NM_000210       | ITGA6       | integrin, alpha 6                                                                  | ENST00000264107 | -0,555840708 |
| A_23_P337155  | NM_001082968    | TOM1L2      | target of myb1-like 2 (chicken)                                                    | ENST00000395739 | -0,555845231 |
| A_23_P128215  | NM_003877       | SOCS2       | suppressor of cytokine signaling 2                                                 | ENST00000549206 | -0,55589997  |
| A_24_P271696  | NM_001097592    | XAGE1A      | X antigen family, member 1A                                                        | ENST00000518075 | -0,555942097 |
| A_23_P121657  | NM_005114       | HS3ST1      | heparan sulfate (glucosamine) 3-O-sulfotransferase 1                               | ENST00000002596 | -0,555955514 |
| A_23_P342108  | NM_152612       | CCDC116     | coiled-coil domain containing 116                                                  | ENST00000292779 | -0,556047165 |
| A_21_P0001680 | TCONS_00002039  | XLOC_000208 |                                                                                    |                 | -0,556052096 |
| A_23_P101246  | NM_001163922    | VSIG10L     | V-set and immunoglobulin domain containing 10 like                                 | ENST00000335624 | -0,556238126 |

|                |                 |              |                                                             |                 |              |
|----------------|-----------------|--------------|-------------------------------------------------------------|-----------------|--------------|
| A_23_P32404    | NM_002201       | ISG20        | interferon stimulated exonuclease gene 20kDa                | ENST00000546338 | -0,556242492 |
| A_33_P3419113  | NM_001002758    | PRY2         | PTPN13-like, Y-linked 2                                     | ENST00000341740 | -0,556272757 |
| A_23_P10506    | NM_014485       | HPGDS        | hematopoietic prostaglandin D synthase                      | ENST00000295256 | -0,556306297 |
| A_23_P114466   | NM_033284       | TBL1Y        | transducin (beta)-like 1, Y-linked                          | ENST00000383032 | -0,55651641  |
| A_23_P361405   | NM_003549       | HYAL3        | hyaluronoglucosaminidase 3                                  | ENST00000336307 | -0,556705332 |
| A_23_P79622    | NM_181342       | FKBP7        | FK506 binding protein 7                                     | ENST00000434643 | -0,556725337 |
| A_33_P3307049  | AK128478        | LOC100129363 | uncharacterized LOC100129363                                |                 | -0,556795339 |
| A_21_P0010473  | BC040576        | XLOC_014323  |                                                             | ENST00000422876 | -0,556796709 |
| A_32_P186027   | NM_006305       | ANP32A       | acidic (leucine-rich) nuclear phosphoprotein 32 family, men | ENST00000409628 | -0,556997129 |
| A_23_P101246   | NM_001163922    | VSIG10L      | V-set and immunoglobulin domain containing 10 like          | ENST00000335624 | -0,557025575 |
| A_21_P0007135  | ENST00000438878 | CDCA5        | cell division cycle associated 5                            | ENST00000438878 | -0,557066952 |
| A_21_P0006881  | TCONS_00018230  | XLOC_008510  |                                                             |                 | -0,55712567  |
| A_24_P294703   | NM_130809       | PRRC1        | proline-rich coiled-coil 1                                  | ENST00000512635 | -0,557136095 |
| A_23_P412321   | NM_000579       | CCR5         | chemokine (C-C motif) receptor 5                            | ENST00000343801 | -0,557276181 |
| A_24_P82630    | NM_015295       | SMCHD1       | structural maintenance of chromosomes flexible hinge dom    | ENST00000320876 | -0,557628099 |
| A_23_P106389   | NM_003612       | SEMA7A       | semaphorin 7A, GPI membrane anchor (John Milton Hagen       | ENST00000543145 | -0,557669962 |
| A_24_P403417   | NM_004878       | PTGES        | prostaglandin E synthase                                    | ENST00000481476 | -0,557684148 |
| A_23_P138725   | NM_031484       | MARVELD1     | MARVEL domain containing 1                                  | ENST00000285605 | -0,557820108 |
| A_33_P3306264  | NM_014400       | LYPD3        | LY6/PLAUR domain containing 3                               | ENST00000377995 | -0,557861938 |
| A_23_P328740   | NR_026875       | NEURL3       | neuralized homolog 3 (Drosophila) pseudogene                | ENST00000310865 | -0,557921729 |
| A_24_P911094   | ENST00000376439 | RABL2A       | RAB, member of RAS oncogene family-like 2A                  | ENST00000376439 | -0,557936132 |
| A_19_P00809886 | THC2537311      | Q16594       |                                                             |                 | -0,55797094  |
| A_23_P256956   | NM_005733       | KIF20A       | kinesin family member 20A                                   | ENST00000502338 | -0,558118036 |
| A_21_P0004437  | THC2720758      | XLOC_004982  |                                                             |                 | -0,558309914 |
| A_23_P19352    | NM_006586       | CNPY3        | canopy 3 homolog (zebrafish)                                | ENST00000394142 | -0,558315936 |
| A_23_P332399   | NM_016315       | GULP1        | GULP, engulfment adaptor PTB domain containing 1            | ENST00000409580 | -0,558490445 |
| A_24_P85775    | NM_001039477    | C1orf38      | chromosome 1 open reading frame 38                          | ENST00000373927 | -0,558603272 |
| A_24_P235429   | NM_005502       | ABCA1        | ATP-binding cassette, sub-family A (ABC1), member 1         | ENST00000374736 | -0,558605925 |
| A_23_P122724   | NM_004665       | VNN2         | vanin 2                                                     | ENST00000392389 | -0,558671221 |

|                |                  |                |                                                            |                 |              |
|----------------|------------------|----------------|------------------------------------------------------------|-----------------|--------------|
| A_23_P19333    | NM_018643        | TREM1          | triggering receptor expressed on myeloid cells 1           | ENST00000244709 | -0,558733473 |
| A_24_P943815   | NM_004650        | PNPLA4         | patatin-like phospholipase domain containing 4             | ENST00000444736 | -0,558825484 |
| A_19_P00319578 | THC2524841       | XLOC_I2_010723 |                                                            |                 | -0,558830347 |
| A_23_P212617   | NM_003234        | TFRC           | transferrin receptor (p90, CD71)                           | ENST00000392396 | -0,558897824 |
| A_23_P215048   | NM_014702        | KIAA0408       | KIAA0408                                                   | ENST00000368281 | -0,558932145 |
| A_33_P3414207  | XR_132689        | LOC100652838   | uncharacterized LOC100652838                               | ENST00000421483 | -0,559134769 |
| A_23_P212617   | NM_003234        | TFRC           | transferrin receptor (p90, CD71)                           | ENST00000392396 | -0,559156386 |
| A_24_P941148   | NM_017645        | HAUS6          | HAUS augmin-like complex, subunit 6                        | ENST00000380502 | -0,559156398 |
| A_32_P119197   | NM_001043352     | TPM3           | tropomyosin 3                                              | ENST00000368533 | -0,559185779 |
| A_33_P3344399  | NM_001199017     | LRRC49         | leucine rich repeat containing 49                          | ENST00000436542 | -0,55928392  |
| A_23_P217917   | NM_147148        | GSTM4          | glutathione S-transferase mu 4                             | ENST00000493171 | -0,559301108 |
| A_23_P210425   | NM_181526        | MYL9           | myosin, light chain 9, regulatory                          | ENST00000279022 | -0,559306583 |
| A_33_P3404601  | NM_001178063     | C2             | complement component 2                                     | ENST00000460487 | -0,559358292 |
| A_21_P0010853  | TCONS_I2_0000337 | XLOC_I2_001841 |                                                            |                 | -0,559541256 |
| A_23_P346006   | NM_020739        | CCPG1          | cell cycle progression 1                                   | ENST00000425574 | -0,559622454 |
| A_23_P3221     | NM_021199        | SQRDL          | sulfide quinone reductase-like (yeast)                     | ENST00000260324 | -0,559687776 |
| A_23_P160720   | NM_018664        | BATF3          | basic leucine zipper transcription factor, ATF-like 3      | ENST00000478275 | -0,559745182 |
| A_23_P134454   | NM_001753        | CAV1           | caveolin 1, caveolae protein, 22kDa                        | ENST00000341049 | -0,559939749 |
| A_23_P212617   | NM_003234        | TFRC           | transferrin receptor (p90, CD71)                           | ENST00000392396 | -0,559942403 |
| A_23_P305140   | NM_144591        | C10orf32       | chromosome 10 open reading frame 32                        | ENST00000369883 | -0,560031031 |
| A_33_P3411628  | NM_000077        | CDKN2A         | cyclin-dependent kinase inhibitor 2A (melanoma, p16, inhib | ENST00000380150 | -0,560074243 |
| A_33_P3366336  | NM_001024401     | SBK1           | SH3-binding domain kinase 1                                | ENST00000341901 | -0,56010876  |
| A_23_P10506    | NM_014485        | HPGDS          | hematopoietic prostaglandin D synthase                     | ENST00000295256 | -0,560167687 |
| A_23_P215634   | NM_001013398     | IGFBP3         | insulin-like growth factor binding protein 3               | ENST00000438491 | -0,56018498  |
| A_23_P97632    | NM_004446        | EPRS           | glutamyl-prolyl-tRNA synthetase                            | ENST00000468487 | -0,560196069 |
| A_23_P101392   | NM_024074        | TMEM38A        | transmembrane protein 38A                                  | ENST00000187762 | -0,560275427 |
| A_23_P116829   | NM_003348        | UBE2N          | ubiquitin-conjugating enzyme E2N                           | ENST00000318066 | -0,560427719 |
| A_19_P00322152 | ENST00000423530  | XLOC_I2_008434 |                                                            | ENST00000423530 | -0,56046213  |
| A_23_P114466   | NM_033284        | TBL1Y          | transducin (beta)-like 1, Y-linked                         | ENST00000383032 | -0,560476073 |

|               |                 |                |                                                                          |                 |              |
|---------------|-----------------|----------------|--------------------------------------------------------------------------|-----------------|--------------|
| A_23_P117662  | NM_002112       | HDC            | histidine decarboxylase                                                  | ENST00000267845 | -0,560483821 |
| A_23_P94030   | NM_002291       | LAMB1          | laminin, beta 1                                                          | ENST00000222399 | -0,560899583 |
| A_33_P3386965 | NM_145167       | PIGM           | phosphatidylinositol glycan anchor biosynthesis, class M                 | ENST00000368090 | -0,560905835 |
| A_23_P58321   | NM_001237       | CCNA2          | cyclin A2                                                                | ENST00000274026 | -0,561020363 |
| A_21_P0006100 | THC2666038      | XLOC_007820    |                                                                          |                 | -0,561087576 |
| A_23_P106362  | NM_020980       | AQP9           | aquaporin 9                                                              | ENST00000219919 | -0,561121543 |
| A_33_P3289536 | NM_001199835    | SNX10          | sorting nexin 10                                                         | ENST00000446848 | -0,561178222 |
| A_23_P106362  | NM_020980       | AQP9           | aquaporin 9                                                              | ENST00000219919 | -0,561181518 |
| A_21_P0013836 | BX111592        | XLOC_l2_015849 |                                                                          |                 | -0,561211595 |
| A_23_P59637   | NM_014705       | DOCK4          | dedicator of cytokinesis 4                                               | ENST00000352877 | -0,561350137 |
| A_33_P3219090 | NM_005542       | INSIG1         | insulin induced gene 1                                                   | ENST00000344756 | -0,561599004 |
| A_23_P30050   | NM_006345       | SLC30A9        | solute carrier family 30 (zinc transporter), member 9                    | ENST00000264451 | -0,561680344 |
| A_24_P287043  | NM_006435       | IFITM2         | interferon induced transmembrane protein 2 (1-8D)                        | ENST00000527146 | -0,561805986 |
| A_24_P413126  | NM_020182       | PMEP1          | prostate transmembrane protein, androgen induced 1                       | ENST00000265626 | -0,562027137 |
| A_23_P23266   | ENST00000367808 | BLZF1          | basic leucine zipper nuclear factor 1                                    | ENST00000367808 | -0,562170458 |
| A_21_P0012147 | NR_038337       | LOC100505783   | uncharacterized LOC100505783                                             |                 | -0,562179693 |
| A_23_P163481  | NM_001211       | BUB1B          | budding uninhibited by benzimidazoles 1 homolog beta (ye:ENST00000412359 | ENST00000412359 | -0,562233415 |
| A_23_P412321  | NM_000579       | CCR5           | chemokine (C-C motif) receptor 5                                         | ENST00000343801 | -0,562367278 |
| A_23_P215997  | NM_000498       | CYP11B2        | cytochrome P450, family 11, subfamily B, polypeptide 2                   | ENST00000323110 | -0,562637439 |
| A_23_P36939   | NM_012345       | NUFIP1         | nuclear fragile X mental retardation protein interacting prot            | ENST00000379161 | -0,562674167 |
| A_23_P133770  | NM_138493       | CCDC167        | coiled-coil domain containing 167                                        | ENST00000373408 | -0,562823126 |
| A_33_P3276678 | NM_199425       | VSX1           | visual system homeobox 1                                                 | ENST00000376707 | -0,562842015 |
| A_23_P207400  | NM_007300       | BRCA1          | breast cancer 1, early onset                                             | ENST00000412061 | -0,562879578 |
| A_23_P31725   | NM_001715       | BLK            | B lymphoid tyrosine kinase                                               | ENST00000427279 | -0,562890779 |
| A_23_P71530   | NM_002546       | TNFRSF11B      | tumor necrosis factor receptor superfamily, member 11b                   | ENST00000521597 | -0,562955182 |
| A_23_P10506   | NM_014485       | HPGDS          | hematopoietic prostaglandin D synthase                                   | ENST00000295256 | -0,563073713 |
| A_23_P109913  | NM_006564       | CXCR6          | chemokine (C-X-C motif) receptor 6                                       | ENST00000438735 | -0,563125611 |
| A_33_P3891747 | AK095403        | LOC284072      | uncharacterized LOC284072                                                |                 | -0,563172044 |
| A_24_P115007  | NM_170740       | ALDH5A1        | aldehyde dehydrogenase 5 family, member A1                               | ENST00000357578 | -0,56332948  |

|                |                  |                |                                                             |                 |              |
|----------------|------------------|----------------|-------------------------------------------------------------|-----------------|--------------|
| A_24_P280113   | NM_001560        | IL13RA1        | interleukin 13 receptor, alpha 1                            | ENST00000371666 | -0,56340517  |
| A_24_P44462    | NM_000366        | TPM1           | tropomyosin 1 (alpha)                                       | ENST00000317516 | -0,563421105 |
| A_23_P200838   | NM_003679        | KMO            | kynurenine 3-monooxygenase (kynurenine 3-hydroxylase)       | ENST00000366559 | -0,563471263 |
| A_21_P0005170  | TCONS_00012744   | XLOC_005744    |                                                             |                 | -0,563506503 |
| A_21_P0012451  | NM_000313        | PROS1          | protein S (alpha)                                           | ENST00000394236 | -0,563564927 |
| A_23_P12082    | NM_001025199     | CHI3L2         | chitinase 3-like 2                                          | ENST00000369748 | -0,563924787 |
| A_21_P0012656  | TCONS_I2_0002105 | XLOC_I2_011043 |                                                             |                 | -0,564002449 |
| A_21_P0003206  | TCONS_00006753   | XLOC_003384    |                                                             |                 | -0,564040889 |
| A_21_P0006902  | AK023036         | LINC00263      | long intergenic non-protein coding RNA 263                  |                 | -0,564105463 |
| A_33_P3341474  | NM_001080412     | ZBTB38         | zinc finger and BTB domain containing 38                    | ENST00000514251 | -0,564116457 |
| A_21_P0013982  | XM_003119160     | LOC100506571   | uncharacterized protein LOC100506571                        |                 | -0,564172146 |
| A_32_P347617   | NM_181773        | APOBEC3H       | apolipoprotein B mRNA editing enzyme, catalytic polypeptide | ENST00000348946 | -0,564207002 |
| A_21_P0010670  | ENST00000446962  | XLOC_I2_001302 |                                                             | ENST00000446962 | -0,564225586 |
| A_33_P3221293  | NM_004403        | DFNA5          | deafness, autosomal dominant 5                              | ENST00000409775 | -0,564256937 |
| A_23_P333218   | NM_001031711     | ERGIC1         | endoplasmic reticulum-golgi intermediate compartment (ER)   | ENST00000523215 | -0,564322102 |
| A_23_P106362   | NM_020980        | AQP9           | aquaporin 9                                                 | ENST00000219919 | -0,564390719 |
| A_23_P122144   | NM_152404        | UGT3A1         | UDP glycosyltransferase 3 family, polypeptide A1            | ENST00000515801 | -0,564431549 |
| A_21_P0014715  | XR_112556        | LOC100505668   | uncharacterized LOC100505668                                | ENST00000462559 | -0,564532041 |
| A_33_P3369029  | NR_033579        | LOC440297      | chondroitin sulfate proteoglycan 4 pseudogene               | ENST00000456932 | -0,564587107 |
| A_21_P0012101  | ENST00000432711  | XLOC_I2_008396 |                                                             | ENST00000432711 | -0,564640966 |
| A_23_P7313     | NM_001040058     | SPP1           | secreted phosphoprotein 1                                   | ENST00000360804 | -0,564705984 |
| A_19_P00320101 | NR_024344        | LOC283174      | uncharacterized LOC283174                                   |                 | -0,564740169 |
| A_23_P103070   | NM_003405        | YWHAH          | tyrosine 3-monooxygenase/tryptophan 5-monooxygenase         | ENST00000248975 | -0,564782258 |
| A_23_P2083     | NM_020646        | ASCL3          | achaete-scute complex homolog 3 (Drosophila)                | ENST00000531618 | -0,564937701 |
| A_21_P0010244  | TCONS_00029017   | XLOC_013940    |                                                             |                 | -0,564973563 |
| A_24_P407930   | NM_031216        | SEH1L          | SEH1-like (S. cerevisiae)                                   | ENST00000262124 | -0,565013929 |
| A_23_P318616   | NM_001039029     | LRTM2          | leucine-rich repeats and transmembrane domains 2            | ENST00000543818 | -0,565067042 |
| A_21_P0013727  | BC065763         | XLOC_I2_015202 |                                                             |                 | -0,565147903 |
| A_21_P0002719  | ENST00000435560  | XLOC_003337    |                                                             | ENST00000435560 | -0,565206443 |



|               |                 |              |                                                                |                 |              |
|---------------|-----------------|--------------|----------------------------------------------------------------|-----------------|--------------|
| A_23_P207400  | NM_007300       | BRCA1        | breast cancer 1, early onset                                   | ENST00000412061 | -0,565416539 |
| A_23_P60499   | NM_021224       | ZNF462       | zinc finger protein 462                                        | ENST00000457913 | -0,565437067 |
| A_23_P98565   | NM_032597       | MS4A14       | membrane-spanning 4-domains, subfamily A, member 14            | ENST00000525397 | -0,565546828 |
| A_23_P372848  | NM_002558       | P2RX1        | purinergic receptor P2X, ligand-gated ion channel, 1           | ENST00000225538 | -0,565662118 |
| A_32_P206698  | NM_001826       | CKS1B        | CDC28 protein kinase regulatory subunit 1B                     | ENST00000308987 | -0,565702487 |
| A_23_P103070  | NM_003405       | YWHAH        | tyrosine 3-monooxygenase/tryptophan 5-monooxygenase-associated | ENST00000248975 | -0,566018754 |
| A_33_P3354569 | NM_001083112    | GPD2         | glycerol-3-phosphate dehydrogenase 2 (mitochondrial)           |                 | -0,566126524 |
| A_21_P0014899 | XR_111214       | LOC100508995 |                                                                |                 | -0,566147486 |
| A_23_P212617  | NM_003234       | TFRC         | transferrin receptor (p90, CD71)                               | ENST00000392396 | -0,56615617  |
| A_21_P0007989 | ENST00000415620 | XLOC_010583  |                                                                | ENST00000415620 | -0,566165636 |
| A_24_P141736  | NM_006838       | METAP2       | methionyl aminopeptidase 2                                     | ENST00000323666 | -0,566198442 |
| A_23_P212617  | NM_003234       | TFRC         | transferrin receptor (p90, CD71)                               | ENST00000392396 | -0,566199112 |
| A_21_P0010905 | NR_028134       | GUCY2GP      | guanylate cyclase 2G homolog (mouse), pseudogene               | ENST00000490269 | -0,566254183 |
| A_32_P14582   | NR_027300       | C3P1         | complement component 3 precursor pseudogene                    | ENST00000495140 | -0,566355074 |
| A_23_P151975  | NM_016321       | RHCG         | Rh family, C glycoprotein                                      | ENST00000536247 | -0,566362325 |
| A_23_P33326   | NM_000679       | ADRA1B       | adrenergic, alpha-1B-, receptor                                |                 | -0,566369716 |
| A_32_P108156  | NR_001458       | MIR155HG     | MIR155 host gene (non-protein coding)                          |                 | -0,566449249 |
| A_23_P73012   | NM_032823       | C9orf3       | chromosome 9 open reading frame 3                              | ENST00000463372 | -0,566534211 |
| A_23_P315789  | NM_000538       | RFXAP        | regulatory factor X-associated protein                         | ENST00000255476 | -0,566649974 |
| A_23_P113701  | NM_002607       | PDGFA        | platelet-derived growth factor alpha polypeptide               | ENST00000402802 | -0,566671281 |
| A_33_P3340025 | NM_021067       | GINS1        | GINS complex subunit 1 (Psf1 homolog)                          | ENST00000262460 | -0,566678697 |
| A_33_P3280213 | NM_001127695    | CTSA         | cathepsin A                                                    | ENST00000372459 | -0,566705774 |
| A_23_P214222  | NM_002356       | MARCKS       | myristoylated alanine-rich protein kinase C substrate          | ENST00000368635 | -0,566712188 |
| A_32_P98683   | NM_005937       | MLLT6        | myeloid/lymphoid or mixed-lineage leukemia (trithorax hom      | ENST00000325718 | -0,566843208 |
| A_23_P1374    | NM_006257       | PRKCQ        | protein kinase C, theta                                        | ENST00000539722 | -0,566960766 |
| A_33_P3880302 | NM_004442       | EPHB2        | EPH receptor B2                                                | ENST00000374632 | -0,567001195 |
| A_21_P0007793 | THC2684861      | XLOC_010251  |                                                                |                 | -0,567139735 |
| A_23_P134085  | NM_173515       | CNKSR3       | CNKSR family member 3                                          | ENST00000367213 | -0,567142572 |
| A_24_P154080  | NM_001397       | ECE1         | endothelin converting enzyme 1                                 | ENST00000470394 | -0,567161083 |

|                |                 |                |                                                                                     |                 |              |
|----------------|-----------------|----------------|-------------------------------------------------------------------------------------|-----------------|--------------|
| A_23_P256956   | NM_005733       | KIF20A         | kinesin family member 20A                                                           | ENST00000502338 | -0,567226433 |
| A_24_P308506   | NM_016347       | NAT8B          | N-acetyltransferase 8B (GCN5-related, putative, gene/pseudogene)                    |                 | -0,567238599 |
| A_23_P58321    | NM_001237       | CCNA2          | cyclin A2                                                                           | ENST00000274026 | -0,567417615 |
| A_23_P19322    | NM_018322       | C6orf64        | chromosome 6 open reading frame 64                                                  | ENST00000229903 | -0,567423417 |
| A_23_P55107    | NM_014683       | ULK2           | unc-51-like kinase 2 (C. elegans)                                                   | ENST00000395544 | -0,5674463   |
| A_24_P135769   | NM_198315       | VWA5A          | von Willebrand factor A domain containing 5A                                        | ENST00000449321 | -0,567467431 |
| A_24_P548866   | NM_001099668    | HIGD1A         | HIG1 hypoxia inducible domain family, member 1A                                     |                 | -0,567486431 |
| A_23_P300076   | NM_032263       | IQCG           | IQ motif containing G                                                               | ENST00000490748 | -0,567593496 |
| A_33_P3244610  | NM_178460       | SIRPD          | signal-regulatory protein delta                                                     | ENST00000381623 | -0,567819689 |
| A_19_P00317507 | NR_038344       | MAGI2-AS3      | MAGI2 antisense RNA 3 (non-protein coding)                                          | ENST00000446159 | -0,567890996 |
| A_32_P84369    | NM_001079529    | FAM153B        | family with sequence similarity 153, member B                                       | ENST00000502475 | -0,56801224  |
| A_21_P0011584  | AK125757        | XLOC_I2_006036 |                                                                                     |                 | -0,568028751 |
| A_33_P3437283  | AK128004        | LOC643551      | uncharacterized LOC643551                                                           |                 | -0,568042383 |
| A_21_P0000772  | NR_038337       | LOC100505783   | uncharacterized LOC100505783                                                        |                 | -0,568072937 |
| A_23_P122724   | NM_004665       | VNN2           | vanin 2                                                                             | ENST00000392389 | -0,568130608 |
| A_23_P106362   | NM_020980       | AQP9           | aquaporin 9                                                                         | ENST00000219919 | -0,568173147 |
| A_23_P11201    | NM_001097579    | GPR34          | G protein-coupled receptor 34                                                       | ENST00000535368 | -0,568183617 |
| A_23_P106362   | NM_020980       | AQP9           | aquaporin 9                                                                         | ENST00000219919 | -0,568192857 |
| A_33_P3234530  | NM_001039664    | TNFRSF25       | tumor necrosis factor receptor superfamily, member 25                               | ENST00000453341 | -0,568232045 |
| A_23_P112482   | NM_004925       | AQP3           | aquaporin 3 (Gill blood group)                                                      | ENST00000494313 | -0,568259095 |
| A_32_P24585    | NM_001017995    | SH3PXD2B       | SH3 and PX domains 2B                                                               | ENST00000311601 | -0,568306613 |
| A_33_P3235568  | NM_001206540    | CAPZB          | capping protein (actin filament) muscle Z-line, beta                                | ENST00000375142 | -0,568696217 |
| A_32_P167471   | NM_024734       | CLMN           | calmin (calponin-like, transmembrane)                                               |                 | -0,568812224 |
| A_23_P429478   | NM_153038       | CCDC140        | coiled-coil domain containing 140                                                   | ENST00000295226 | -0,568871497 |
| A_33_P3363355  | NM_022377       | ICAM4          | intercellular adhesion molecule 4 (Landsteiner-Wiener bloo                          | ENST00000393717 | -0,568989754 |
| A_33_P3399228  | NM_032808       | LINGO1         | leucine rich repeat and Ig domain containing 1                                      | ENST00000355300 | -0,569024394 |
| A_21_P0006012  | ENST00000445963 | XLOC_007370    |                                                                                     | ENST00000445963 | -0,569039783 |
| A_32_P222695   | NM_001001669    | ARHGEF37       | Rho guanine nucleotide exchange factor (GEF) 37                                     | ENST00000333677 | -0,569044736 |
| A_23_P44663    | XR_110240       | SERPINA2       | serpin peptidase inhibitor, clade A (alpha-1 antiproteinase, antitrypsin), member 2 |                 | -0,569129764 |

|                |                |                |                                                                           |                 |              |
|----------------|----------------|----------------|---------------------------------------------------------------------------|-----------------|--------------|
| A_21_P0000869  | NR_039975      | LOC100506229   | uncharacterized LOC100506229                                              |                 | -0,569147723 |
| A_24_P307626   | NM_144699      | ATP1A4         | ATPase, Na <sup>+</sup> /K <sup>+</sup> transporting, alpha 4 polypeptide | ENST00000477338 | -0,569173781 |
| A_23_P370682   | NM_138456      | BATF2          | basic leucine zipper transcription factor, ATF-like 2                     | ENST00000527454 | -0,569222532 |
| A_23_P381714   | NM_198584      | CA13           | carbonic anhydrase XIII                                                   | ENST00000321764 | -0,569507694 |
| A_21_P0014363  | XR_109462      | LOC100505577   | uncharacterized LOC100505577                                              |                 | -0,569527826 |
| A_33_P3267651  | NM_014648      | DZIP3          | DAZ interacting protein 3, zinc finger                                    | ENST00000393969 | -0,569606452 |
| A_24_P416131   | NM_021149      | COTL1          | coactosin-like 1 (Dictyostelium)                                          | ENST00000262428 | -0,569633325 |
| A_21_P0003190  | TCONS_00006708 | XLOC_003327    |                                                                           |                 | -0,569707763 |
| A_33_P3316683  | NM_152897      | SNX21          | sorting nexin family member 21                                            | ENST00000466252 | -0,570016325 |
| A_33_P3385062  | NM_024511      | HAUS3          | HAUS augmin-like complex, subunit 3                                       | ENST00000243706 | -0,570054452 |
| A_23_P212617   | NM_003234      | TFRC           | transferrin receptor (p90, CD71)                                          | ENST00000392396 | -0,570136728 |
| A_23_P103486   | NM_000775      | CYP2J2         | cytochrome P450, family 2, subfamily J, polypeptide 2                     | ENST00000469406 | -0,570143373 |
| A_23_P103070   | NM_003405      | YWHAH          | tyrosine 3-monooxygenase/tryptophan 5-monooxygenase alpha                 | ENST00000248975 | -0,570239828 |
| A_23_P388812   | NM_152515      | CKAP2L         | cytoskeleton associated protein 2-like                                    | ENST00000435431 | -0,570302495 |
| A_23_P7313     | NM_001040058   | SPP1           | secreted phosphoprotein 1                                                 | ENST00000360804 | -0,570317189 |
| A_33_P3388501  | NM_003465      | CHIT1          | chitinase 1 (chitotriosidase)                                             | ENST00000491855 | -0,570365577 |
| A_23_P110184   | NM_006745      | MSMO1          | methylsterol monooxygenase 1                                              | ENST00000393766 | -0,570466858 |
| A_23_P106602   | NM_031476      | CRISPLD2       | cysteine-rich secretory protein LCCL domain containing 2                  | ENST00000262424 | -0,57062077  |
| A_24_P323114   | NR_001446      | ANXA2P3        | annexin A2 pseudogene 3                                                   |                 | -0,570673986 |
| A_32_P157945   | NM_004415      | DSP            | desmoplakin                                                               | ENST00000418664 | -0,570714065 |
| A_24_P337746   | NM_014504      | RABGEF1        | RAB guanine nucleotide exchange factor (GEF) 1                            | ENST00000380827 | -0,570803554 |
| A_21_P0010080  | DB030984       | XLOC_013463    |                                                                           |                 | -0,571645856 |
| A_21_P0012427  | AK127293       | XLOC_l2_010064 |                                                                           |                 | -0,571691472 |
| A_23_P113161   | NM_030806      | C1orf21        | chromosome 1 open reading frame 21                                        | ENST00000235307 | -0,571784714 |
| A_19_P00318517 | CN294843       | XLOC_014192    |                                                                           |                 | -0,572094207 |
| A_33_P3416563  | NM_016108      | AIG1           | androgen-induced 1                                                        | ENST00000344492 | -0,572258165 |
| A_23_P44155    | NM_198196      | CD96           | CD96 molecule                                                             | ENST00000283285 | -0,572302165 |
| A_21_P0005644  | TCONS_00014576 | XLOC_006686    |                                                                           |                 | -0,572320378 |
| A_23_P121825   | NM_024941      | C5orf44        | chromosome 5 open reading frame 44                                        | ENST00000545191 | -0,572361271 |

|                |                 |              |                                                             |  |                 |              |
|----------------|-----------------|--------------|-------------------------------------------------------------|--|-----------------|--------------|
| A_21_P0005660  | THC2736788      | XLOC_006723  |                                                             |  |                 | -0,572437952 |
| A_21_P0006669  | ENST00000434552 | XLOC_008447  |                                                             |  | ENST00000434552 | -0,572593708 |
| A_33_P3244574  | NR_024562       | LOC100128675 | uncharacterized LOC100128675                                |  | ENST00000392227 | -0,572611269 |
| A_23_P64888    | NM_023921       | TAS2R10      | taste receptor, type 2, member 10                           |  | ENST00000240619 | -0,572621918 |
| A_21_P0014096  | XR_108421       | LOC100507265 | uncharacterized LOC100507265                                |  |                 | -0,572692684 |
| A_23_P12733    | NM_018649       | H2AFY2       | H2A histone family, member Y2                               |  | ENST00000373255 | -0,572745523 |
| A_23_P10506    | NM_014485       | HPGDS        | hematopoietic prostaglandin D synthase                      |  | ENST00000295256 | -0,572842575 |
| A_23_P105545   | NM_016830       | VAMP1        | vesicle-associated membrane protein 1 (synaptobrevin 1)     |  | ENST00000535927 | -0,572859885 |
| A_33_P3327479  | NM_016598       | ZDHHC3       | zinc finger, DHHC-type containing 3                         |  | ENST00000339420 | -0,572922084 |
| A_21_P0001596  | TCONS_00001714  | XLOC_001081  |                                                             |  |                 | -0,57322354  |
| A_21_P0014093  | XR_108413       | LOC100507039 | uncharacterized LOC100507039                                |  |                 | -0,573516912 |
| A_23_P27584    | NM_001020818    | MYADM        | myeloid-associated differentiation marker                   |  | ENST00000391771 | -0,573589519 |
| A_33_P3259960  | AK125579        | LOC100128019 | uncharacterized LOC100128019                                |  |                 | -0,573713037 |
| A_21_P0014067  | ENST00000412772 | LOC100506775 |                                                             |  | ENST00000412772 | -0,57372505  |
| A_21_P0009978  | TCONS_00028230  | XLOC_013574  |                                                             |  |                 | -0,573852793 |
| A_33_P3383970  | NM_030956       | TLR10        | toll-like receptor 10                                       |  | ENST00000361424 | -0,574111804 |
| A_21_P0013082  | AK126413        | LOC652990    | uncharacterized LOC652990                                   |  |                 | -0,574270125 |
| A_33_P3261520  | ENST00000508366 | ATP6AP1L     | ATPase, H+ transporting, lysosomal accessory protein 1-like |  | ENST00000508366 | -0,574350932 |
| A_23_P118254   | NM_001451       | FOXF1        | forkhead box F1                                             |  | ENST00000262426 | -0,574377696 |
| A_23_P113701   | NM_002607       | PDGFA        | platelet-derived growth factor alpha polypeptide            |  | ENST00000402802 | -0,574413612 |
| A_24_P388433   | NM_002718       | PPP2R3A      | protein phosphatase 2, regulatory subunit B", alpha         |  | ENST00000264977 | -0,574470391 |
| A_33_P3394252  | NM_152519       | C2orf67      | chromosome 2 open reading frame 67                          |  | ENST00000281772 | -0,574608749 |
| A_19_P00318495 | NR_026761       | LINC00467    | long intergenic non-protein coding RNA 467                  |  |                 | -0,57473638  |
| A_23_P114883   | NM_002023       | FMOD         | fibromodulin                                                |  | ENST00000354955 | -0,574885985 |
| A_21_P0013913  | XM_001713923    | LOC728802    | myomegalin-like                                             |  |                 | -0,574972394 |
| A_24_P236235   | NM_013231       | FLRT2        | fibronectin leucine rich transmembrane protein 2            |  | ENST00000330753 | -0,575213547 |
| A_23_P58321    | NM_001237       | CCNA2        | cyclin A2                                                   |  | ENST00000274026 | -0,575437965 |
| A_23_P345118   | NM_002648       | PIM1         | pim-1 oncogene                                              |  | ENST00000373509 | -0,575459602 |
| A_23_P113777   | NM_004791       | ITGBL1       | integrin, beta-like 1 (with EGF-like repeat domains)        |  | ENST00000376162 | -0,57550835  |

|                |                 |             |                                                            |                 |              |
|----------------|-----------------|-------------|------------------------------------------------------------|-----------------|--------------|
| A_23_P8185     | NM_006519       | DYNLT1      | dynein, light chain, Tctex-type 1                          | ENST00000367088 | -0,575513904 |
| A_33_P3399267  | NM_172200       | IL15RA      | interleukin 15 receptor, alpha                             | ENST00000379972 | -0,575640729 |
| A_23_P135669   | NM_030958       | SLCO5A1     | solute carrier organic anion transporter family, member 5A | ENST00000526750 | -0,575662425 |
| A_23_P86283    | NM_006762       | LAPTM5      | lysosomal protein transmembrane 5                          | ENST00000294507 | -0,575722235 |
| A_24_P475814   | NM_025136       | OPA3        | optic atrophy 3 (autosomal recessive, with chorea and spas | ENST00000263275 | -0,575769579 |
| A_33_P3387951  | NM_020340       | KIAA1244    | KIAA1244                                                   | ENST00000251691 | -0,575777959 |
| A_21_P0008121  | THC2744504      | XLOC_010503 |                                                            |                 | -0,575852053 |
| A_33_P3383233  | NM_201535       | NDRG2       | NDRG family member 2                                       | ENST00000397847 | -0,575871233 |
| A_23_P113161   | NM_030806       | C1orf21     | chromosome 1 open reading frame 21                         | ENST00000235307 | -0,575903934 |
| A_23_P338890   | NM_002827       | PTPN1       | protein tyrosine phosphatase, non-receptor type 1          | ENST00000371621 | -0,575964693 |
| A_23_P102611   | NM_003881       | WISP2       | WNT1 inducible signaling pathway protein 2                 | ENST00000372868 | -0,57597937  |
| A_23_P106661   | NM_052999       | CMTM1       | CKLF-like MARVEL transmembrane domain containing 1         | ENST00000379490 | -0,576005832 |
| A_23_P412562   | NM_174896       | C1orf162    | chromosome 1 open reading frame 162                        | ENST00000369718 | -0,576079009 |
| A_23_P106362   | NM_020980       | AQP9        | aquaporin 9                                                | ENST00000219919 | -0,576160614 |
| A_19_P00320274 | NR_024431       | LOC283050   | uncharacterized LOC283050                                  |                 | -0,576206627 |
| A_23_P120566   | NM_001042576    | RRBP1       | ribosome binding protein 1 homolog 180kDa (dog)            | ENST00000455029 | -0,576321216 |
| A_23_P105144   | NM_020974       | SCUBE2      | signal peptide, CUB domain, EGF-like 2                     | ENST00000518447 | -0,576354336 |
| A_33_P3323188  | NR_027237       | LOC728743   | zinc finger protein pseudogene                             | ENST00000476489 | -0,576380694 |
| A_23_P106602   | NM_031476       | CRISPLD2    | cysteine-rich secretory protein LCCL domain containing 2   | ENST00000262424 | -0,576511538 |
| A_23_P67042    | NM_017947       | MOCOS       | molybdenum cofactor sulfurase                              | ENST00000261326 | -0,57659544  |
| A_21_P0005962  | ENST00000523946 | XLOC_007052 |                                                            | ENST00000523946 | -0,57666694  |
| A_23_P33364    | NM_001009555    | SH3D19      | SH3 domain containing 19                                   | ENST00000514152 | -0,576899341 |
| A_21_P0005696  | TCONS_00014700  | XLOC_006798 |                                                            |                 | -0,576910237 |
| A_33_P3295328  | NM_001007033    | CLEC6A      | C-type lectin domain family 6, member A                    | ENST00000382073 | -0,57700817  |
| A_23_P412321   | NM_000579       | CCR5        | chemokine (C-C motif) receptor 5                           | ENST00000343801 | -0,577047159 |
| A_33_P3352970  | NM_001570       | IRAK2       | interleukin-1 receptor-associated kinase 2                 | ENST00000256458 | -0,577093876 |
| A_23_P7313     | NM_001040058    | SPP1        | secreted phosphoprotein 1                                  | ENST00000360804 | -0,577137153 |
| A_24_P252364   | NM_001037132    | NRCAM       | neuronal cell adhesion molecule                            | ENST00000351718 | -0,577186085 |
| A_23_P110184   | NM_006745       | MSMO1       | methylsterol monooxygenase 1                               | ENST00000393766 | -0,577226514 |



|               |                 |           |                                                                |                 |              |
|---------------|-----------------|-----------|----------------------------------------------------------------|-----------------|--------------|
| A_21_P0000547 | NR_027767       | TNIK      | TRAF2 and NCK interacting kinase                               | ENST00000465393 | -0,57725655  |
| A_24_P160491  | ENST00000440303 | FAM159A   | family with sequence similarity 159, member A                  | ENST00000440303 | -0,57726346  |
| A_23_P19020   | NM_005460       | SNCAIP    | synuclein, alpha interacting protein                           | ENST00000414317 | -0,577306518 |
| A_23_P6771    | NM_014583       | LMCD1     | LIM and cysteine-rich domains 1                                | ENST00000157600 | -0,577307357 |
| A_23_P34788   | NM_006845       | KIF2C     | kinesin family member 2C                                       | ENST00000372218 | -0,577307485 |
| A_33_P3298990 | NM_014207       | CD5       | CD5 molecule                                                   | ENST00000347785 | -0,577319326 |
| A_23_P107132  | NM_002903       | RCVRN     | recoverin                                                      | ENST00000226193 | -0,577319978 |
| A_23_P202117  | ENST00000490164 | PCGF5     | polycomb group ring finger 5                                   | ENST00000490164 | -0,577497447 |
| A_33_P3316978 | NM_207396       | RNF207    | ring finger protein 207                                        | ENST00000377948 | -0,577541326 |
| A_23_P121657  | NM_005114       | HS3ST1    | heparan sulfate (glucosamine) 3-O-sulfotransferase 1           | ENST00000002596 | -0,577564692 |
| A_23_P7313    | NM_001040058    | SPP1      | secreted phosphoprotein 1                                      | ENST00000360804 | -0,57771576  |
| A_33_P3687198 | AK094730        | LOC283454 | uncharacterized LOC283454                                      |                 | -0,577719224 |
| A_23_P61057   | NM_004513       | IL16      | interleukin 16                                                 | ENST00000394656 | -0,577723602 |
| A_24_P254551  | NM_015185       | ARHGEF9   | Cdc42 guanine nucleotide exchange factor (GEF) 9               | ENST00000374870 | -0,577778646 |
| A_23_P214360  | NM_002460       | IRF4      | interferon regulatory factor 4                                 | ENST00000412334 | -0,577835433 |
| A_32_P147622  | NR_034002       | MCF2L-AS1 | MCF2L antisense RNA 1 (non-protein coding)                     | ENST00000446789 | -0,577863425 |
| A_23_P412321  | NM_000579       | CCR5      | chemokine (C-C motif) receptor 5                               | ENST00000343801 | -0,577900505 |
| A_23_P78543   | NM_005498       | AP1M2     | adaptor-related protein complex 1, mu 2 subunit                | ENST00000250244 | -0,577908459 |
| A_32_P2452    | NM_175861       | TMTC1     | transmembrane and tetratricopeptide repeat containing 1        | ENST00000256062 | -0,578137043 |
| A_33_P3383326 | NM_057159       | LPAR1     | lysophosphatidic acid receptor 1                               | ENST00000374430 | -0,578244586 |
| A_23_P412321  | NM_000579       | CCR5      | chemokine (C-C motif) receptor 5                               | ENST00000343801 | -0,578250595 |
| A_32_P88262   | NM_020949       | SLC7A14   | solute carrier family 7 (orphan transporter), member 14        |                 | -0,578279396 |
| A_32_P194246  | NM_015226       | CLEC16A   | C-type lectin domain family 16, member A                       | ENST00000381822 | -0,578371989 |
| A_23_P114466  | NM_033284       | TBL1Y     | transducin (beta)-like 1, Y-linked                             | ENST00000383032 | -0,578380343 |
| A_33_P3594654 | NM_024121       | TMEM185B  | transmembrane protein 185B                                     |                 | -0,578506014 |
| A_23_P120467  | NM_199427       | ZFP64     | zinc finger protein 64 homolog (mouse)                         | ENST00000361387 | -0,578592391 |
| A_23_P163567  | NM_018667       | SMPD3     | sphingomyelin phosphodiesterase 3, neutral membrane (ne        | ENST00000219334 | -0,578647515 |
| A_23_P419213  | NM_020817       | KIAA1407  | KIAA1407                                                       | ENST00000295878 | -0,578693782 |
| A_24_P122403  | NM_003198       | TCEB3     | transcription elongation factor B (SIII), polypeptide 3 (110kI | ENST00000418390 | -0,578695367 |

|               |                 |                |                                                              |                 |              |
|---------------|-----------------|----------------|--------------------------------------------------------------|-----------------|--------------|
| A_23_P14193   | NM_002915       | RFC3           | replication factor C (activator 1) 3, 38kDa                  | ENST00000380071 | -0,578775531 |
| A_23_P60517   | NM_181425       | FXN            | frataxin                                                     | ENST00000396366 | -0,578974709 |
| A_23_P119337  | NM_012068       | ATF5           | activating transcription factor 5                            | ENST00000423777 | -0,579026697 |
| A_23_P106362  | NM_020980       | AQP9           | aquaporin 9                                                  | ENST00000219919 | -0,579204561 |
| A_23_P156739  | NM_032340       | C6orf125       | chromosome 6 open reading frame 125                          | ENST00000374231 | -0,579224071 |
| A_21_P0007390 | TCONS_00019741  | XLOC_009535    |                                                              |                 | -0,579253696 |
| A_23_P76799   | NM_013448       | BAZ1A          | bromodomain adjacent to zinc finger domain, 1A               | ENST00000360310 | -0,579326952 |
| A_33_P3390778 | NM_025058       | TRIM46         | tripartite motif containing 46                               | ENST00000392451 | -0,579417041 |
| A_23_P202978  | NM_033292       | CASP1          | caspase 1, apoptosis-related cysteine peptidase (interleukin | ENST00000534497 | -0,579526379 |
| A_33_P3288824 | NM_080720       | H2AFB3         | H2A histone family, member B3                                |                 | -0,579559276 |
| A_21_P0001676 | THC2624247      | XLOC_000166    |                                                              |                 | -0,57959489  |
| A_23_P412321  | NM_000579       | CCR5           | chemokine (C-C motif) receptor 5                             | ENST00000343801 | -0,579604627 |
| A_21_P0014426 | NR_040535       | LOC100506472   | uncharacterized LOC100506472                                 |                 | -0,579608801 |
| A_23_P121222  | NM_020165       | RAD18          | RAD18 homolog (S. cerevisiae)                                | ENST00000264926 | -0,579659086 |
| A_21_P0014268 | ENST00000525365 | LOC100506082   |                                                              | ENST00000525365 | -0,579904457 |
| A_23_P23584   | NM_020248       | CTNNBIP1       | catenin, beta interacting protein 1                          | ENST00000377263 | -0,579928163 |
| A_23_P70794   | NM_016277       | RAB23          | RAB23, member RAS oncogene family                            | ENST00000317483 | -0,579965478 |
| A_21_P0013865 | ENST00000422194 | XLOC_I2_015752 |                                                              | ENST00000422194 | -0,580106253 |
| A_23_P385322  | NM_020799       | STAMBPL1       | STAM binding protein-like 1                                  | ENST00000371926 | -0,580195768 |
| A_23_P123853  | NM_006274       | CCL19          | chemokine (C-C motif) ligand 19                              | ENST00000485502 | -0,580339266 |
| A_23_P58321   | NM_001237       | CCNA2          | cyclin A2                                                    | ENST00000274026 | -0,580522909 |
| A_32_P149298  | NM_001129993    | KIAA1841       | KIAA1841                                                     | ENST00000453873 | -0,580554989 |
| A_24_P294408  | NM_015900       | PLA1A          | phospholipase A1 member A                                    | ENST00000273371 | -0,580619428 |
| A_33_P3413987 | NM_000062       | SERPING1       | serpin peptidase inhibitor, clade G (C1 inhibitor), member 1 | ENST00000278407 | -0,58064294  |
| A_23_P147641  | NM_003195       | TCEA2          | transcription elongation factor A (SII), 2                   | ENST00000440819 | -0,580708437 |
| A_21_P0008663 | THC2616036      | XLOC_011331    |                                                              |                 | -0,58085482  |
| A_23_P17134   | NM_002371       | MAL            | mal, T-cell differentiation protein                          | ENST00000309988 | -0,580934587 |
| A_23_P105002  | NM_000327       | ROM1           | retinal outer segment membrane protein 1                     | ENST00000278833 | -0,581003108 |
| A_21_P0006579 | BC015977        | XLOC_008151    |                                                              |                 | -0,581012996 |

|               |                 |                |                                                             |                 |              |
|---------------|-----------------|----------------|-------------------------------------------------------------|-----------------|--------------|
| A_23_P30243   | NM_022350       | ERAP2          | endoplasmic reticulum aminopeptidase 2                      | ENST00000379904 | -0,581161194 |
| A_23_P109913  | NM_006564       | CXCR6          | chemokine (C-X-C motif) receptor 6                          | ENST00000438735 | -0,581186319 |
| A_23_P118254  | NM_001451       | FOXF1          | forkhead box F1                                             | ENST00000262426 | -0,581187297 |
| A_21_P0007880 | XR_110374       | LOC100507195   | uncharacterized LOC100507195                                |                 | -0,58127064  |
| A_23_P138507  | NM_001786       | CDK1           | cyclin-dependent kinase 1                                   | ENST00000448257 | -0,581409191 |
| A_23_P307761  | NM_031215       | CABLES2        | Cdk5 and Abl enzyme substrate 2                             | ENST00000279101 | -0,581432677 |
| A_23_P4036    | NM_018469       | TEX2           | testis expressed 2                                          | ENST00000258991 | -0,581455547 |
| A_23_P106389  | NM_003612       | SEMA7A         | semaphorin 7A, GPI membrane anchor (John Milton Hagen       | ENST00000543145 | -0,581601673 |
| A_23_P7313    | NM_001040058    | SPP1           | secreted phosphoprotein 1                                   | ENST00000360804 | -0,581951768 |
| A_23_P434398  | NM_153235       | TXLNB          | taxilin beta                                                | ENST00000358430 | -0,582335839 |
| A_23_P48669   | NM_005192       | CDKN3          | cyclin-dependent kinase inhibitor 3                         | ENST00000555837 | -0,582434592 |
| A_33_P3297050 | NM_033087       | ALG2           | asparagine-linked glycosylation 2, alpha-1,3-mannosyltransf | ENST00000238477 | -0,582457915 |
| A_32_P54242   | NM_153686       | LCORL          | ligand dependent nuclear receptor corepressor-like          | ENST00000326877 | -0,583014919 |
| A_23_P77593   | NM_018052       | VAC14          | Vac14 homolog ( <i>S. cerevisiae</i> )                      | ENST00000536184 | -0,583049462 |
| A_23_P21495   | NM_003890       | FCGBP          | Fc fragment of IgG binding protein                          | ENST00000221347 | -0,583175408 |
| A_23_P103511  | NM_001085375    | C1orf226       | chromosome 1 open reading frame 226                         | ENST00000458626 | -0,583178923 |
| A_23_P412321  | NM_000579       | CCR5           | chemokine (C-C motif) receptor 5                            | ENST00000343801 | -0,583215246 |
| A_33_P3333810 | NM_003350       | UBE2V2         | ubiquitin-conjugating enzyme E2 variant 2                   | ENST00000523111 | -0,583280554 |
| A_23_P129209  | NM_002168       | IDH2           | isocitrate dehydrogenase 2 (NADP+), mitochondrial           | ENST00000540499 | -0,583287219 |
| A_23_P361584  | NM_152680       | TMEM154        | transmembrane protein 154                                   | ENST00000304385 | -0,583354741 |
| A_24_P276628  | NM_000310       | PPT1           | palmitoyl-protein thioesterase 1                            | ENST00000527107 | -0,583536977 |
| A_23_P108823  | NM_032523       | OSBPL6         | oxysterol binding protein-like 6                            | ENST00000315022 | -0,583588599 |
| A_21_P0013428 | ENST00000451381 | XLOC_l2_013857 |                                                             | ENST00000451381 | -0,583668298 |
| A_23_P121657  | NM_005114       | HS3ST1         | heparan sulfate (glucosamine) 3-O-sulfotransferase 1        | ENST00000002596 | -0,583692353 |
| A_24_P272761  | NM_020946       | DENND1A        | DENN/MADD domain containing 1A                              | ENST00000373624 | -0,583719991 |
| A_23_P394064  | NM_012232       | PTRF           | polymerase I and transcript release factor                  | ENST00000357037 | -0,583907775 |
| A_33_P3209096 | NM_001779       | CD58           | CD58 molecule                                               | ENST00000464088 | -0,584405304 |
| A_23_P7313    | NM_001040058    | SPP1           | secreted phosphoprotein 1                                   | ENST00000360804 | -0,584526436 |
| A_21_P0001045 | ENST00000448412 | XLOC_000509    |                                                             | ENST00000448412 | -0,584573832 |

|               |                  |                |                                                               |                 |              |
|---------------|------------------|----------------|---------------------------------------------------------------|-----------------|--------------|
| A_23_P76386   | NM_003044        | SLC6A12        | solute carrier family 6 (neurotransmitter transporter, betair | ENST00000424061 | -0,58461177  |
| A_23_P81441   | NM_130848        | C5orf20        | chromosome 5 open reading frame 20                            | ENST00000537858 | -0,584662162 |
| A_32_P94667   | NM_014644        | PDE4DIP        | phosphodiesterase 4D interacting protein                      | ENST00000530062 | -0,584674073 |
| A_33_P3240538 | NM_016262        | TUBE1          | tubulin, epsilon 1                                            | ENST00000368662 | -0,584675492 |
| A_23_P41750   | NM_032567        | SPZ1           | spermatogenic leucine zipper 1                                | ENST00000296739 | -0,584819132 |
| A_23_P119337  | NM_012068        | ATF5           | activating transcription factor 5                             | ENST00000423777 | -0,584839408 |
| A_23_P106362  | NM_020980        | AQP9           | aquaporin 9                                                   | ENST00000219919 | -0,584850253 |
| A_23_P10025   | NM_006159        | NELL2          | NEL-like 2 (chicken)                                          | ENST00000437801 | -0,584883534 |
| A_33_P3286362 | AK127441         | LOC100131023   | uncharacterized LOC100131023                                  |                 | -0,584893301 |
| A_23_P210048  | NM_006037        | HDAC4          | histone deacetylase 4                                         | ENST00000345617 | -0,584929506 |
| A_21_P0002277 | THC2755124       | XLOC_001640    |                                                               |                 | -0,584987647 |
| A_24_P20630   | NM_016269        | LEF1           | lymphoid enhancer-binding factor 1                            | ENST00000503879 | -0,585121989 |
| A_24_P937855  | NM_001102396     | SIKE1          | suppressor of IKBKE 1                                         | ENST00000369528 | -0,585198333 |
| A_33_P3249574 | NM_004866        | SCAMP1         | secretory carrier membrane protein 1                          | ENST00000538629 | -0,5852313   |
| A_21_P0003297 | THC2639066       | XLOC_003228    |                                                               |                 | -0,585438642 |
| A_24_P193435  | NM_003257        | TJP1           | tight junction protein 1 (zona occludens 1)                   | ENST00000545208 | -0,585477399 |
| A_23_P210538  | NM_182764        | ELMO2          | engulfment and cell motility 2                                | ENST00000352077 | -0,585527241 |
| A_33_P3268304 | NM_001161404     | LIMS2          | LIM and senescent cell antigen-like domains 2                 | ENST00000537572 | -0,585595493 |
| A_23_P42718   | NM_004289        | NFE2L3         | nuclear factor (erythroid-derived 2)-like 3                   | ENST00000398175 | -0,585746582 |
| A_24_P286898  | ENST00000374189  | MAPK8          | mitogen-activated protein kinase 8                            | ENST00000374189 | -0,585933677 |
| A_24_P33982   | NM_001085423     | MILR1          | mast cell immunoglobulin-like receptor 1                      |                 | -0,586003388 |
| A_24_P372217  | NM_007175        | ERLIN2         | ER lipid raft associated 2                                    | ENST00000276461 | -0,586062191 |
| A_23_P71530   | NM_002546        | TNFRSF11B      | tumor necrosis factor receptor superfamily, member 11b        | ENST00000521597 | -0,586145393 |
| A_21_P0007660 | TCONS_00021252   | XLOC_009941    |                                                               |                 | -0,586276628 |
| A_23_P413760  | NM_175080        | P2RX5          | purinergic receptor P2X, ligand-gated ion channel, 5          | ENST00000440619 | -0,586336636 |
| A_23_P214208  | NM_033181        | CNR1           | cannabinoid receptor 1 (brain)                                | ENST00000369499 | -0,586532354 |
| A_33_P3395758 | NM_001017923     | C14orf28       | chromosome 14 open reading frame 28                           | ENST00000555826 | -0,586569044 |
| A_33_P3253528 | NM_004275        | MED20          | mediator complex subunit 20                                   | ENST00000409312 | -0,586626238 |
| A_21_P0013592 | TCONS_I2_0002883 | XLOC_I2_014850 |                                                               |                 | -0,586709358 |

|               |                 |                |                                                                       |                 |              |
|---------------|-----------------|----------------|-----------------------------------------------------------------------|-----------------|--------------|
| A_23_P127406  | NM_018039       | KDM4D          | lysine (K)-specific demethylase 4D                                    | ENST00000536741 | -0,586760064 |
| A_23_P122724  | NM_004665       | VNN2           | vanin 2                                                               | ENST00000392389 | -0,586843285 |
| A_23_P7313    | NM_001040058    | SPP1           | secreted phosphoprotein 1                                             | ENST00000360804 | -0,586888158 |
| A_24_P30923   | NM_003498       | SNN            | stannin                                                               | ENST00000329565 | -0,587066181 |
| A_23_P106389  | NM_003612       | SEMA7A         | semaphorin 7A, GPI membrane anchor (John Milton Hagen                 | ENST00000543145 | -0,587089043 |
| A_23_P412321  | NM_000579       | CCR5           | chemokine (C-C motif) receptor 5                                      | ENST00000343801 | -0,587258921 |
| A_23_P140563  | NM_001040655    | TTC23          | tetratricopeptide repeat domain 23                                    | ENST00000494567 | -0,587508238 |
| A_21_P0012945 | BG214557        | XLOC_I2_011627 |                                                                       |                 | -0,587525081 |
| A_21_P0005592 | ENST00000480919 | XLOC_006326    |                                                                       | ENST00000480919 | -0,587618453 |
| A_33_P3286774 | ENST00000479369 | PDE4DIP        | phosphodiesterase 4D interacting protein                              | ENST00000479369 | -0,587737221 |
| A_23_P109171  | NM_001195       | BFSP1          | beaded filament structural protein 1, filensin                        | ENST00000536626 | -0,587776814 |
| A_33_P3223759 | NM_005121       | MED13          | mediator complex subunit 13                                           | ENST00000397786 | -0,588183445 |
| A_23_P10232   | NM_017935       | BANK1          | B-cell scaffold protein with ankyrin repeats 1                        | ENST00000322953 | -0,588248412 |
| A_23_P60248   | NM_003329       | TXN            | thioredoxin                                                           | ENST00000487892 | -0,58830755  |
| A_23_P111662  | NM_178559       | ABCB5          | ATP-binding cassette, sub-family B (MDR/TAP), member 5                | ENST00000258738 | -0,588654593 |
| A_23_P110462  | NM_013340       | PCDHB1         | protocadherin beta 1                                                  | ENST00000306549 | -0,588897093 |
| A_21_P0009341 | NR_030732       | LOC645638      | WDMN1-like pseudogene                                                 |                 | -0,588943439 |
| A_23_P116829  | NM_003348       | UBE2N          | ubiquitin-conjugating enzyme E2N                                      | ENST00000318066 | -0,588966704 |
| A_32_P209094  | NM_018291       | FGGY           | FGGY carbohydrate kinase domain containing                            | ENST00000480847 | -0,589022906 |
| A_21_P0010565 | NM_004595       | SMS            | spermine synthase                                                     | ENST00000404933 | -0,589189482 |
| A_23_P77437   | NM_019023       | PRMT7          | protein arginine methyltransferase 7                                  | ENST00000441236 | -0,589263444 |
| A_23_P87545   | NM_021034       | IFITM3         | interferon induced transmembrane protein 3                            | ENST00000531688 | -0,589298606 |
| A_23_P391443  | NM_020700       | PPM1H          | protein phosphatase, Mg <sup>2+</sup> /Mn <sup>2+</sup> dependent, 1H | ENST00000228705 | -0,589378647 |
| A_21_P0008361 | TCONS_00022564  | XLOC_010883    |                                                                       |                 | -0,589410559 |
| A_24_P26897   | NM_005539       | INPP5A         | inositol polyphosphate-5-phosphatase, 40kDa                           | ENST00000368594 | -0,589417006 |
| A_23_P113701  | NM_002607       | PDGFA          | platelet-derived growth factor alpha polypeptide                      | ENST00000402802 | -0,589421026 |
| A_23_P350574  | NM_001002901    | FCRLB          | Fc receptor-like B                                                    | ENST00000495397 | -0,589480092 |
| A_33_P3411632 | NM_025268       | TMEM121        | transmembrane protein 121                                             | ENST00000392519 | -0,589486859 |
| A_23_P10936   | NM_033060       | KRTAP4-1       | keratin associated protein 4-1                                        | ENST00000398472 | -0,58949343  |



|                |                |             |                                                           |                 |              |
|----------------|----------------|-------------|-----------------------------------------------------------|-----------------|--------------|
| A_33_P3369336  | NM_002054      | GCG         | glucagon                                                  | ENST00000375497 | -0,589530081 |
| A_24_P45620    | NM_021995      | UTS2        | urotensin 2                                               | ENST00000054668 | -0,589690323 |
| A_23_P423482   | NM_152450      | FAM81A      | family with sequence similarity 81, member A              | ENST00000288228 | -0,589827114 |
| A_32_P98072    | NM_007113      | TCHH        | trichohyalin                                              | ENST00000368804 | -0,589878544 |
| A_24_P45367    | NM_020448      | NIPAL3      | NIPA-like domain containing 3                             | ENST00000003912 | -0,589952821 |
| A_23_P106389   | NM_003612      | SEMA7A      | semaphorin 7A, GPI membrane anchor (John Milton Hagen     | ENST00000543145 | -0,589960838 |
| A_23_P7282     | NM_153702      | ELMOD2      | ELMO/CED-12 domain containing 2                           | ENST00000323570 | -0,589967689 |
| A_21_P0012927  | NM_001164478   | C5orf63     | chromosome 5 open reading frame 63                        | ENST00000556512 | -0,589991017 |
| A_21_P0008755  | W87326         | XLOC_011520 |                                                           |                 | -0,590084535 |
| A_33_P3806965  | AK023806       | FLJ13744    | uncharacterized FLJ13744                                  |                 | -0,590172176 |
| A_33_P3346826  | NM_001012633   | IL32        | interleukin 32                                            | ENST00000528652 | -0,590187772 |
| A_21_P0000727  | NR_038216      | LOC154092   | uncharacterized LOC154092                                 | ENST00000456749 | -0,590196627 |
| A_32_P83811    | NM_001242936   | FAM47E      | family with sequence similarity 47, member E              | ENST00000424749 | -0,590225482 |
| A_23_P334664   | NM_033247      | PML         | promyelocytic leukemia                                    | ENST00000395132 | -0,590378553 |
| A_23_P106362   | NM_020980      | AQP9        | aquaporin 9                                               | ENST00000219919 | -0,590611298 |
| A_23_P7313     | NM_001040058   | SPP1        | secreted phosphoprotein 1                                 | ENST00000360804 | -0,590802333 |
| A_23_P412321   | NM_000579      | CCR5        | chemokine (C-C motif) receptor 5                          | ENST00000343801 | -0,590812783 |
| A_21_P0005541  | TCONS_00014004 | XLOC_006644 |                                                           |                 | -0,590841013 |
| A_21_P0006521  | AF085905       | XLOC_008100 |                                                           |                 | -0,590931756 |
| A_23_P103511   | NM_001085375   | C1orf226    | chromosome 1 open reading frame 226                       | ENST00000458626 | -0,590997248 |
| A_23_P40453    | NM_001236      | CBR3        | carbonyl reductase 3                                      | ENST00000290354 | -0,591121858 |
| A_19_P00320619 | NR_027481      | ZNF876P     |                                                           | ENST00000356347 | -0,591138291 |
| A_33_P3291619  | NR_040079      | LOC399715   | uncharacterized LOC399715                                 | ENST00000399868 | -0,591211934 |
| A_23_P259090   | NM_031438      | NUDT12      | nudix (nucleoside diphosphate linked moiety X)-type motif | ENST00000230792 | -0,591433654 |
| A_23_P215883   | NM_001040630   | NCALD       | neurocalcin delta                                         | ENST00000395923 | -0,591468054 |
| A_33_P3230478  | NM_201442      | C1S         | complement component 1, s subcomponent                    | ENST00000403949 | -0,591593317 |
| A_23_P122077   | NM_016591      | GCNT4       | glucosaminyl (N-acetyl) transferase 4, core 2             | ENST00000322348 | -0,591796173 |
| A_24_P57730    | NM_181304      | MRPL52      | mitochondrial ribosomal protein L52                       | ENST00000355151 | -0,591916893 |
| A_33_P3327921  | NM_012249      | RHOQ        | ras homolog gene family, member Q                         |                 | -0,592023854 |

|                |                 |              |                                                          |                 |              |
|----------------|-----------------|--------------|----------------------------------------------------------|-----------------|--------------|
| A_23_P23438    | NM_022367       | SEMA4A       | sema domain, immunoglobulin domain (Ig), transmembran    | ENST00000544376 | -0,592107324 |
| A_33_P3357535  | NM_030579       | CYB5B        | cytochrome b5 type B (outer mitochondrial membrane)      | ENST00000307892 | -0,592177441 |
| A_19_P00318494 | NR_026761       | LINC00467    | long intergenic non-protein coding RNA 467               |                 | -0,592205946 |
| A_23_P204947   | NM_004004       | GJB2         | gap junction protein, beta 2, 26kDa                      | ENST00000382844 | -0,592427096 |
| A_23_P256581   | NM_021620       | PRDM13       | PR domain containing 13                                  | ENST00000369214 | -0,592435361 |
| A_23_P154457   | NM_024894       | NOL10        | nucleolar protein 10                                     | ENST00000345985 | -0,592576622 |
| A_23_P6596     | NM_005524       | HES1         | hairy and enhancer of split 1, (Drosophila)              | ENST00000476918 | -0,592611371 |
| A_21_P0007484  | NR_040245       | LOC100287314 | uncharacterized LOC100287314                             | ENST00000547804 | -0,592644444 |
| A_23_P138507   | NM_001786       | CDK1         | cyclin-dependent kinase 1                                | ENST00000448257 | -0,592680036 |
| A_23_P119337   | NM_012068       | ATF5         | activating transcription factor 5                        | ENST00000423777 | -0,592844844 |
| A_21_P0014247  | XR_109012       | LOC100507309 | uncharacterized LOC100507309                             |                 | -0,592893026 |
| A_23_P342727   | NM_178006       | STARD13      | StAR-related lipid transfer (START) domain containing 13 | ENST00000336934 | -0,592963067 |
| A_21_P0006675  | ENST00000442526 | XLOC_008467  |                                                          | ENST00000442526 | -0,593225047 |
| A_32_P142818   | NM_178120       | DLX1         | distal-less homeobox 1                                   | ENST00000361725 | -0,593312242 |
| A_23_P157333   | NM_005232       | EPHA1        | EPH receptor A1                                          | ENST00000488068 | -0,593357361 |
| A_33_P3672756  | XR_112106       | LOC284561    | uncharacterized LOC284561                                |                 | -0,593384195 |
| A_23_P204947   | NM_004004       | GJB2         | gap junction protein, beta 2, 26kDa                      | ENST00000382844 | -0,593391139 |
| A_23_P88331    | NM_014750       | DLGAP5       | discs, large (Drosophila) homolog-associated protein 5   | ENST00000247191 | -0,593443099 |
| A_23_P110941   | NM_001512       | GSTA4        | glutathione S-transferase alpha 4                        | ENST00000370960 | -0,593636004 |
| A_21_P0007826  | TCONS_00021085  | XLOC_009678  |                                                          |                 | -0,593692414 |
| A_23_P128281   | NM_007333       | KLRC3        | killer cell lectin-like receptor subfamily C, member 3   | ENST00000381903 | -0,593713446 |
| A_21_P0002736  | ENST00000424786 | XLOC_002612  |                                                          | ENST00000424786 | -0,593825809 |
| A_23_P101246   | NM_001163922    | VSIG10L      | V-set and immunoglobulin domain containing 10 like       | ENST00000335624 | -0,593870122 |
| A_21_P0014154  | XR_108621       | LOC100507367 | uncharacterized LOC100507367                             |                 | -0,59393874  |
| A_23_P92334    | NM_024943       | TMEM156      | transmembrane protein 156                                | ENST00000381938 | -0,593998394 |
| A_23_P154208   | NM_017567       | NAGK         | N-acetylglucosamine kinase                               | ENST00000455197 | -0,594141    |
| A_19_P00321148 | AK055877        | LOC100506328 | uncharacterized LOC100506328                             |                 | -0,594667412 |
| A_33_P3276323  | NR_033886       | RAD21-AS1    | RAD21 antisense RNA 1 (non-protein coding)               | ENST00000521487 | -0,594713724 |
| A_23_P127565   | NM_178834       | LAYN         | layilin                                                  | ENST00000375615 | -0,594743022 |

|               |                  |                |                                                             |                 |              |
|---------------|------------------|----------------|-------------------------------------------------------------|-----------------|--------------|
| A_23_P412321  | NM_000579        | CCR5           | chemokine (C-C motif) receptor 5                            | ENST00000343801 | -0,594790043 |
| A_21_P0011789 | TCONS_I2_0001343 | XLOC_I2_007176 |                                                             |                 | -0,594957691 |
| A_33_P3240018 | NM_000922        | PDE3B          | phosphodiesterase 3B, cGMP-inhibited                        | ENST00000282096 | -0,5949665   |
| A_33_P3310371 | NR_027436        | LOC283788      | FSHD region gene 1 pseudogene                               | ENST00000418749 | -0,59506901  |
| A_21_P0012259 | TCONS_I2_0001765 | XLOC_I2_009328 |                                                             |                 | -0,595281203 |
| A_32_P20454   | NM_001098398     | COPA           | coatamer protein complex, subunit alpha                     |                 | -0,595296211 |
| A_33_P3267799 | NM_006847        | LILRB4         | leukocyte immunoglobulin-like receptor, subfamily B (with   | ENST00000270452 | -0,595479629 |
| A_23_P7313    | NM_001040058     | SPP1           | secreted phosphoprotein 1                                   | ENST00000360804 | -0,59552131  |
| A_33_P3391656 | NM_033550        | TP53RK         | TP53 regulating kinase                                      | ENST00000372114 | -0,59571367  |
| A_23_P121222  | NM_020165        | RAD18          | RAD18 homolog (S. cerevisiae)                               | ENST00000264926 | -0,595768245 |
| A_21_P0005134 | ENST00000457339  | XLOC_005466    |                                                             | ENST00000457339 | -0,595818602 |
| A_32_P180958  | NM_016297        | PCYOX1         | prenylcysteine oxidase 1                                    | ENST00000433351 | -0,596234267 |
| A_23_P111701  | NM_004126        | GNG11          | guanine nucleotide binding protein (G protein), gamma 11    | ENST00000248564 | -0,596247696 |
| A_23_P317465  | NM_016530        | RAB8B          | RAB8B, member RAS oncogene family                           | ENST00000321437 | -0,596280774 |
| A_24_P944827  | NM_006395        | ATG7           | ATG7 autophagy related 7 homolog (S. cerevisiae)            | ENST00000354449 | -0,59636595  |
| A_23_P10506   | NM_014485        | HPGDS          | hematopoietic prostaglandin D synthase                      | ENST00000295256 | -0,596413583 |
| A_21_P0010485 | NR_028032        | HCG9           | HLA complex group 9 (non-protein coding)                    | ENST00000376800 | -0,596472106 |
| A_23_P151075  | NM_001175        | ARHGDIB        | Rho GDP dissociation inhibitor (GDI) beta                   | ENST00000228945 | -0,596896528 |
| A_23_P119778  | NM_020342        | SLC39A10       | solute carrier family 39 (zinc transporter), member 10      | ENST00000409086 | -0,596917402 |
| A_33_P3379251 | NM_001105581     | LRRC30         | leucine rich repeat containing 30                           | ENST00000383467 | -0,596972498 |
| A_23_P110184  | NM_006745        | MSMO1          | methylsterol monooxygenase 1                                | ENST00000393766 | -0,596980763 |
| A_23_P116829  | NM_003348        | UBE2N          | ubiquitin-conjugating enzyme E2N                            | ENST00000318066 | -0,597030188 |
| A_21_P0012763 | ENST00000513681  | XLOC_I2_011007 |                                                             | ENST00000513681 | -0,597084639 |
| A_24_P363278  | NM_005906        | MAK            | male germ cell-associated kinase                            | ENST00000313243 | -0,597181929 |
| A_23_P67042   | NM_017947        | MOCOS          | molybdenum cofactor sulfurase                               | ENST00000261326 | -0,597413559 |
| A_24_P472455  | NM_001663        | ARF6           | ADP-ribosylation factor 6                                   |                 | -0,597415269 |
| A_23_P503010  | NM_153646        | SLC24A4        | solute carrier family 24 (sodium/potassium/calcium exchan   | ENST00000532405 | -0,59781128  |
| A_32_P130630  | NM_004731        | SLC16A7        | solute carrier family 16, member 7 (monocarboxylic acid tra | ENST00000261187 | -0,598123484 |
| A_21_P0011259 | CR620068         | XLOC_I2_004317 |                                                             |                 | -0,598255526 |

|               |                 |             |                                                                |                 |              |
|---------------|-----------------|-------------|----------------------------------------------------------------|-----------------|--------------|
| A_33_P3396214 | NM_172229       | KREMEN2     | kringle containing transmembrane protein 2                     | ENST00000303746 | -0,598323366 |
| A_32_P32413   | NM_015559       | SETBP1      | SET binding protein 1                                          | ENST00000282030 | -0,598336542 |
| A_23_P107744  | NM_030760       | S1PR5       | sphingosine-1-phosphate receptor 5                             | ENST00000359134 | -0,598345609 |
| A_21_P0000664 | ENST00000544344 | CD4         | CD4 molecule                                                   | ENST00000544344 | -0,598384098 |
| A_21_P0004136 | ENST00000515199 | XLOC_004859 |                                                                | ENST00000515199 | -0,598400842 |
| A_33_P3281795 | NM_007283       | MGLL        | monoglyceride lipase                                           | ENST00000265052 | -0,598404904 |
| A_21_P0009032 | THC2784828      | XLOC_011943 |                                                                |                 | -0,598529971 |
| A_24_P81900   | NM_006931       | SLC2A3      | solute carrier family 2 (facilitated glucose transporter), men | ENST00000486749 | -0,598737126 |
| A_23_P215060  | NM_001018111    | PODXL       | podocalyxin-like                                               | ENST00000541194 | -0,598840925 |
| A_33_P3482534 | BC043571        | LOC613266   | uncharacterized LOC613266                                      |                 | -0,598942223 |
| A_21_P0005674 | BU195360        | XLOC_006743 |                                                                |                 | -0,598946422 |
| A_32_P94722   | NM_052893       | BTBD9       | BTB (POZ) domain containing 9                                  | ENST00000481247 | -0,59895625  |
| A_23_P204947  | NM_004004       | GJB2        | gap junction protein, beta 2, 26kDa                            | ENST00000382844 | -0,59914907  |
| A_23_P73609   | NM_000266       | NDP         | Norrie disease (pseudoglioma)                                  | ENST00000378062 | -0,599399256 |
| A_23_P118834  | NM_001067       | TOP2A       | topoisomerase (DNA) II alpha 170kDa                            | ENST00000269577 | -0,599502593 |
| A_23_P150394  | NM_022003       | FXYP6       | FXYP domain containing ion transport regulator 6               | ENST00000526014 | -0,599534013 |
| A_24_P296698  | NM_145109       | MAP2K3      | mitogen-activated protein kinase kinase 3                      | ENST00000316920 | -0,599639761 |
| A_33_P3619171 | NM_021127       | PMAIP1      | phorbol-12-myristate-13-acetate-induced protein 1              | ENST00000269518 | -0,599746516 |
| A_23_P11201   | NM_001097579    | GPR34       | G protein-coupled receptor 34                                  | ENST00000535368 | -0,599791389 |
| A_23_P120845  | NM_005080       | XBP1        | X-box binding protein 1                                        | ENST00000415306 | -0,599854299 |
| A_23_P109171  | NM_001195       | BFSP1       | beaded filament structural protein 1, filensin                 | ENST00000536626 | -0,599949728 |
| A_23_P111995  | NM_002318       | LOXL2       | lysyl oxidase-like 2                                           | ENST00000389131 | -0,59996762  |
| A_23_P101246  | NM_001163922    | VSIG10L     | V-set and immunoglobulin domain containing 10 like             | ENST00000335624 | -0,599974809 |
| A_23_P302550  | NM_130782       | RGS18       | regulator of G-protein signaling 18                            | ENST00000367460 | -0,600099102 |
| A_33_P3368188 | NM_006640       | Sep-09      | septin 9                                                       | ENST00000397613 | -0,600136487 |
| A_23_P39067   | NM_003121       | SPIB        | Spi-B transcription factor (Spi-1/PU.1 related)                | ENST00000270632 | -0,600156489 |
| A_23_P104098  | NM_177402       | SYT2        | synaptotagmin II                                               | ENST00000367267 | -0,6002367   |
| A_23_P111701  | NM_004126       | GNG11       | guanine nucleotide binding protein (G protein), gamma 11       | ENST00000248564 | -0,600292217 |
| A_23_P210708  | NM_001040022    | SIRPA       | signal-regulatory protein alpha                                | ENST00000358771 | -0,600504387 |

|               |                 |             |                                                             |                 |              |
|---------------|-----------------|-------------|-------------------------------------------------------------|-----------------|--------------|
| A_33_P3241541 | CR936789        | FSD1L       | fibronectin type III and SPRY domain containing 1-like      | ENST00000374707 | -0,60053712  |
| A_33_P3356731 | NM_015332       | NUDCD3      | NudC domain containing 3                                    | ENST00000355451 | -0,600841939 |
| A_23_P104438  | NM_032578       | MYPN        | myopalladin                                                 | ENST00000354393 | -0,600854746 |
| A_23_P72568   | NM_003794       | SNX4        | sorting nexin 4                                             | ENST00000251775 | -0,60091384  |
| A_23_P106602  | NM_031476       | CRISPLD2    | cysteine-rich secretory protein LCCL domain containing 2    | ENST00000262424 | -0,60103703  |
| A_23_P406385  | NM_153350       | FBXL16      | F-box and leucine-rich repeat protein 16                    | ENST00000324361 | -0,601073814 |
| A_23_P12082   | NM_001025199    | CHI3L2      | chitinase 3-like 2                                          | ENST00000369748 | -0,601098584 |
| A_32_P14610   | NM_006457       | PDLIM5      | PDZ and LIM domain 5                                        | ENST00000317968 | -0,601210804 |
| A_23_P337934  | NM_017556       | FBLIM1      | filamin binding LIM protein 1                               | ENST00000400773 | -0,601316325 |
| A_23_P201376  | NM_014021       | SSX2IP      | synovial sarcoma, X breakpoint 2 interacting protein        | ENST00000437941 | -0,601531517 |
| A_23_P1014    | NR_026761       | LINC00467   | long intergenic non-protein coding RNA 467                  |                 | -0,601545975 |
| A_23_P140450  | NM_003645       | SLC27A2     | solute carrier family 27 (fatty acid transporter), member 2 | ENST00000544960 | -0,601712102 |
| A_21_P0010137 | NR_033840       | LINC00163   | long intergenic non-protein coding RNA 163                  | ENST00000434081 | -0,601720824 |
| A_33_P3404706 | NM_001030288    | SPN         | sialophorin                                                 | ENST00000360121 | -0,601778506 |
| A_23_P10506   | NM_014485       | HPGDS       | hematopoietic prostaglandin D synthase                      | ENST00000295256 | -0,601829358 |
| A_21_P0007222 | ENST00000535746 | XLOC_009181 |                                                             | ENST00000535746 | -0,601881582 |
| A_33_P3245439 | NM_001250       | CD40        | CD40 molecule, TNF receptor superfamily member 5            | ENST00000477696 | -0,601922938 |
| A_33_P3269110 | NM_001130686    | GUCY1A3     | guanylate cyclase 1, soluble, alpha 3                       | ENST00000512983 | -0,601931078 |
| A_23_P67042   | NM_017947       | MOCOS       | molybdenum cofactor sulfurase                               | ENST00000261326 | -0,602037603 |
| A_23_P207400  | NM_007300       | BRCA1       | breast cancer 1, early onset                                | ENST00000412061 | -0,602082105 |
| A_23_P7313    | NM_001040058    | SPP1        | secreted phosphoprotein 1                                   | ENST00000360804 | -0,602125507 |
| A_23_P106389  | NM_003612       | SEMA7A      | semaphorin 7A, GPI membrane anchor (John Milton Hagen       | ENST00000543145 | -0,602164187 |
| A_21_P0006135 | TCONS_00015940  | XLOC_007308 |                                                             |                 | -0,602240396 |
| A_33_P3403576 | NM_001136219    | FCGR2A      | Fc fragment of IgG, low affinity IIa, receptor (CD32)       | ENST00000271450 | -0,602317883 |
| A_24_P940517  | NM_016297       | PCYOX1      | prenylcysteine oxidase 1                                    | ENST00000433351 | -0,602373598 |
| A_23_P113701  | NM_002607       | PDGFA       | platelet-derived growth factor alpha polypeptide            | ENST00000402802 | -0,602393278 |
| A_23_P118254  | NM_001451       | FOXF1       | forkhead box F1                                             | ENST00000262426 | -0,602472565 |
| A_23_P414312  | NM_152643       | KNDC1       | kinase non-catalytic C-lobe domain (KIND) containing 1      | ENST00000304613 | -0,602508179 |
| A_23_P204947  | NM_004004       | GJB2        | gap junction protein, beta 2, 26kDa                         | ENST00000382844 | -0,602645409 |



|               |                 |              |                                                                      |                 |              |
|---------------|-----------------|--------------|----------------------------------------------------------------------|-----------------|--------------|
| A_33_P3334443 | NM_001252271    | FAM69A       | family with sequence similarity 69, member A                         | ENST00000370310 | -0,602693832 |
| A_24_P134392  | NM_006948       | HSPA13       | heat shock protein 70kDa family, member 13                           | ENST00000285667 | -0,602809336 |
| A_23_P360302  | NM_001522       | GUCY2F       | guanylate cyclase 2F, retinal                                        | ENST00000218006 | -0,602820078 |
| A_32_P133072  | NM_006108       | SPON1        | spondin 1, extracellular matrix protein                              | ENST00000533633 | -0,60301405  |
| A_21_P0000843 | NR_038930       | LOC100507250 | uncharacterized LOC100507250                                         |                 | -0,603111019 |
| A_33_P3286157 | NM_003327       | TNFRSF4      | tumor necrosis factor receptor superfamily, member 4                 | ENST00000497869 | -0,603113222 |
| A_23_P138507  | NM_001786       | CDK1         | cyclin-dependent kinase 1                                            | ENST00000448257 | -0,603116554 |
| A_33_P3418025 | NM_001334       | CTSO         | cathepsin O                                                          | ENST00000433477 | -0,603129932 |
| A_23_P203920  | NM_005086       | SSPN         | sarcospan (Kras oncogene-associated gene)                            | ENST00000422622 | -0,60332934  |
| A_23_P329870  | NM_024599       | RHBDF2       | rhomoid 5 homolog 2 (Drosophila)                                     | ENST00000313080 | -0,603738064 |
| A_33_P3415551 | NM_207328       | GPAT2        | glycerol-3-phosphate acyltransferase 2, mitochondrial                | ENST00000377137 | -0,60378949  |
| A_23_P103511  | NM_001085375    | C1orf226     | chromosome 1 open reading frame 226                                  | ENST00000458626 | -0,603865249 |
| A_21_P0002254 | TCONS_00003758  | XLOC_001558  |                                                                      |                 | -0,603917437 |
| A_32_P96692   | NM_006502       | POLH         | polymerase (DNA directed), eta                                       |                 | -0,604119587 |
| A_23_P58321   | NM_001237       | CCNA2        | cyclin A2                                                            | ENST00000274026 | -0,604190666 |
| A_33_P3449097 | NM_031945       | TSPAN10      | tetraspanin 10                                                       | ENST00000540189 | -0,604253243 |
| A_32_P128391  | NR_038842       | LOC728431    | uncharacterized LOC728431                                            | ENST00000424989 | -0,604460626 |
| A_23_P150018  | NM_004419       | DUSP5        | dual specificity phosphatase 5                                       | ENST00000369583 | -0,604554368 |
| A_21_P0000015 | NM_001146106    | PARP9        | poly (ADP-ribose) polymerase family, member 9                        | ENST00000462315 | -0,604811272 |
| A_23_P129085  | NM_145658       | SPESP1       | sperm equatorial segment protein 1                                   | ENST00000310673 | -0,604858825 |
| A_32_P183918  | NR_033851       | MGC39372     | serpin peptidase inhibitor, clade B (ovalbumin), member 9 pseudogene |                 | -0,604984968 |
| A_23_P134627  | NM_133457       | EMID2        | EMI domain containing 2                                              | ENST00000313669 | -0,605053858 |
| A_21_P0003577 | TCONS_00007998  | XLOC_003461  |                                                                      |                 | -0,605526104 |
| A_21_P0000997 | ENST00000454466 | XLOC_000319  |                                                                      | ENST00000454466 | -0,605537523 |
| A_23_P75741   | NM_198183       | UBE2L6       | ubiquitin-conjugating enzyme E2L 6                                   | ENST00000528275 | -0,605540481 |
| A_24_P211797  | NM_178231       | ICA1L        | islet cell autoantigen 1,69kDa-like                                  | ENST00000411681 | -0,605550632 |
| A_24_P28295   | NM_001243765    | RABGAP1L     | RAB GTPase activating protein 1-like                                 | ENST00000367686 | -0,605575352 |
| A_33_P3272291 | NM_001818       | AKR1C4       | aldo-keto reductase family 1, member C4 (chlordecone red)            | ENST00000397357 | -0,605739285 |
| A_33_P3214650 | NM_000544       | TAP2         | transporter 2, ATP-binding cassette, sub-family B (MDR/TAF)          | ENST00000452371 | -0,605757798 |

|                |                 |              |                                                              |                 |              |
|----------------|-----------------|--------------|--------------------------------------------------------------|-----------------|--------------|
| A_24_P12136    | NM_130772       | S100Z        | S100 calcium binding protein Z                               | ENST00000513010 | -0,605769811 |
| A_23_P254842   | NM_012080       | HDHD1        | haloacid dehalogenase-like hydrolase domain containing 1     | ENST00000544385 | -0,606302511 |
| A_19_P00322939 | NR_003367       | PVT1         |                                                              |                 | -0,606450303 |
| A_33_P3372910  | NM_014314       | DDX58        | DEAD (Asp-Glu-Ala-Asp) box polypeptide 58                    | ENST00000379882 | -0,606458934 |
| A_23_P253317   | NM_013308       | GPR171       | G protein-coupled receptor 171                               | ENST00000309180 | -0,606477467 |
| A_24_P319113   | NM_002562       | P2RX7        | purinergic receptor P2X, ligand-gated ion channel, 7         | ENST00000377162 | -0,606640058 |
| A_23_P52207    | NM_012342       | BAMBI        | BMP and activin membrane-bound inhibitor homolog (Xenc       | ENST00000542444 | -0,606869213 |
| A_21_P0000958  | ENST00000412797 | XLOC_000101  |                                                              | ENST00000412797 | -0,606904987 |
| A_23_P134454   | NM_001753       | CAV1         | caveolin 1, caveolae protein, 22kDa                          | ENST00000341049 | -0,607049561 |
| A_21_P0003549  | NR_039975       | LOC100506229 | uncharacterized LOC100506229                                 | ENST00000515864 | -0,607063233 |
| A_23_P90626    | NM_004288       | CYTIP        | cytohesin 1 interacting protein                              | ENST00000540637 | -0,607292446 |
| A_23_P110412   | NM_001080506    | TMEM150C     | transmembrane protein 150C                                   | ENST00000449862 | -0,60745097  |
| A_33_P3383866  | NM_016381       | TREX1        | three prime repair exonuclease 1                             | ENST00000422277 | -0,608148405 |
| A_23_P1014     | NR_026761       | LINC00467    | long intergenic non-protein coding RNA 467                   |                 | -0,608326105 |
| A_23_P113701   | NM_002607       | PDGFA        | platelet-derived growth factor alpha polypeptide             | ENST00000402802 | -0,608626592 |
| A_23_P340333   | NM_033397       | ITPRIP       | inositol 1,4,5-trisphosphate receptor interacting protein    | ENST00000358187 | -0,608687393 |
| A_21_P0010326  | TCONS_00029312  | XLOC_014110  |                                                              |                 | -0,608776803 |
| A_23_P209426   | NM_015049       | TRAK2        | trafficking protein, kinesin binding 2                       | ENST00000332624 | -0,608868023 |
| A_24_P344711   | NM_020132       | AGPAT3       | 1-acylglycerol-3-phosphate O-acyltransferase 3               | ENST00000398058 | -0,608896583 |
| A_24_P19544    | NM_013233       | STK39        | serine threonine kinase 39                                   | ENST00000355999 | -0,60908735  |
| A_33_P3311073  | NM_012313       | KIR2DS3      | killer cell immunoglobulin-like receptor, two domains, short | ENST00000339924 | -0,60937815  |
| A_23_P102017   | NM_020711       | ERMN         | ermin, ERM-like protein                                      | ENST00000397283 | -0,609398815 |
| A_23_P202345   | NM_032804       | ADO          | 2-aminoethanethiol (cysteamine) dioxygenase                  | ENST00000373783 | -0,609434021 |
| A_21_P0000141  | NM_001198844    | RBM4         | RNA binding motif protein 4                                  | ENST00000550837 | -0,609666465 |
| A_21_P0011514  | NM_001190790    | CDRT15L2     | CMT1A duplicated region transcript 15-like 2                 | ENST00000399044 | -0,609903165 |
| A_23_P103486   | NM_000775       | CYP2J2       | cytochrome P450, family 2, subfamily J, polypeptide 2        | ENST00000469406 | -0,609948223 |
| A_23_P379071   | NM_145032       | FBXL13       | F-box and leucine-rich repeat protein 13                     | ENST00000455112 | -0,609949037 |
| A_33_P3366175  | NR_034003       | LOC100130298 | hCG1816373-like                                              | ENST00000525556 | -0,610178923 |
| A_23_P57036    | NM_001250       | CD40         | CD40 molecule, TNF receptor superfamily member 5             | ENST00000477696 | -0,61028596  |

|               |                 |              |                                                                          |                 |              |
|---------------|-----------------|--------------|--------------------------------------------------------------------------|-----------------|--------------|
| A_33_P3287223 | NM_001935       | DPP4         | dipeptidyl-peptidase 4                                                   | ENST00000360534 | -0,610386695 |
| A_23_P167509  | NM_001037332    | CYFIP2       | cytoplasmic FMR1 interacting protein 2                                   | ENST00000347377 | -0,610547987 |
| A_24_P343233  | NM_002124       | HLA-DRB1     | major histocompatibility complex, class II, DR beta 1                    | ENST00000549627 | -0,61062955  |
| A_24_P202558  | NM_015073       | SIPA1L3      | signal-induced proliferation-associated 1 like 3                         | ENST00000222345 | -0,61069392  |
| A_24_P50972   | NM_001145004    | GOLGA6L6     | golgin A6 family-like 6                                                  | ENST00000454724 | -0,610778602 |
| A_33_P3617655 | NR_038928       | LOC339442    | uncharacterized LOC339442                                                | ENST00000431311 | -0,61081856  |
| A_23_P102117  | NM_025216       | WNT10A       | wingless-type MMTV integration site family, member 10A                   | ENST00000258411 | -0,611011125 |
| A_21_P0010168 | ENST00000417820 | XLOC_013973  |                                                                          | ENST00000417820 | -0,611087682 |
| A_33_P3422471 | XM_003403636    | LOC100506255 | uncharacterized protein LOC100506255                                     |                 | -0,611119216 |
| A_32_P76035   | NM_033109       | PNPT1        | polyribonucleotide nucleotidyltransferase 1                              | ENST00000260604 | -0,611119419 |
| A_21_P0008965 | THC2697393      | XLOC_011774  |                                                                          |                 | -0,611123571 |
| A_23_P57036   | NM_001250       | CD40         | CD40 molecule, TNF receptor superfamily member 5                         | ENST00000477696 | -0,611123893 |
| A_21_P0007550 | ENST00000546738 | XLOC_009733  |                                                                          | ENST00000546738 | -0,61122147  |
| A_23_P62932   | NM_001677       | ATP1B1       | ATPase, Na <sup>+</sup> /K <sup>+</sup> transporting, beta 1 polypeptide | ENST00000367816 | -0,611919227 |
| A_23_P204947  | NM_004004       | GJB2         | gap junction protein, beta 2, 26kDa                                      | ENST00000382844 | -0,611961839 |
| A_33_P3738458 | NM_022648       | TNS1         | tensin 1                                                                 | ENST00000171887 | -0,612041867 |
| A_21_P0005069 | TCONS_00012332  | XLOC_005877  |                                                                          |                 | -0,612116272 |
| A_23_P113161  | NM_030806       | C1orf21      | chromosome 1 open reading frame 21                                       | ENST00000235307 | -0,612134974 |
| A_33_P3288189 | NM_014899       | RHOBTB3      | Rho-related BTB domain containing 3                                      | ENST00000379982 | -0,61234456  |
| A_33_P3341105 | NM_002602       | PDE6G        | phosphodiesterase 6G, cGMP-specific, rod, gamma                          | ENST00000331056 | -0,612390339 |
| A_21_P0002311 | TCONS_00003929  | XLOC_001741  |                                                                          |                 | -0,612528218 |
| A_23_P119337  | NM_012068       | ATF5         | activating transcription factor 5                                        | ENST00000423777 | -0,612619213 |
| A_23_P24444   | NM_001360       | DHCR7        | 7-dehydrocholesterol reductase                                           | ENST00000355527 | -0,612637117 |
| A_23_P121222  | NM_020165       | RAD18        | RAD18 homolog (S. cerevisiae)                                            | ENST00000264926 | -0,612640298 |
| A_21_P0004612 | BC038196        | XLOC_005773  |                                                                          | ENST00000441949 | -0,612683484 |
| A_23_P114466  | NM_033284       | TBL1Y        | transducin (beta)-like 1, Y-linked                                       | ENST00000383032 | -0,612692284 |
| A_23_P10025   | NM_006159       | NELL2        | NEL-like 2 (chicken)                                                     | ENST00000437801 | -0,612895033 |
| A_23_P138881  | NM_001104       | ACTN3        | actinin, alpha 3                                                         | ENST00000502692 | -0,612912543 |
| A_23_P10232   | NM_017935       | BANK1        | B-cell scaffold protein with ankyrin repeats 1                           | ENST00000322953 | -0,613052369 |

|                |                 |                |                                                                   |                 |              |
|----------------|-----------------|----------------|-------------------------------------------------------------------|-----------------|--------------|
| A_24_P112087   | NM_014034       | ASF1A          | ASF1 anti-silencing function 1 homolog A ( <i>S. cerevisiae</i> ) | ENST00000229595 | -0,613080313 |
| A_23_P160159   | NM_003039       | SLC2A5         | solute carrier family 2 (facilitated glucose/fructose transpor    | ENST00000377424 | -0,613196144 |
| A_19_P00321636 | THC2548196      | XLOC_014192    |                                                                   |                 | -0,613325733 |
| A_23_P155351   | NM_000060       | BTD            | biotinidase                                                       | ENST00000383778 | -0,613333642 |
| A_33_P3267208  | NM_022048       | CSNK1G1        | casein kinase 1, gamma 1                                          | ENST00000303052 | -0,613525695 |
| A_19_P00316135 | NR_027252       | CYP1B1-AS1     |                                                                   | ENST00000413828 | -0,613533934 |
| A_24_P102821   | NM_000952       | PTAFR          | platelet-activating factor receptor                               | ENST00000305392 | -0,613606424 |
| A_24_P333421   | NM_001099220    | ZNF862         | zinc finger protein 862                                           | ENST00000223210 | -0,613637467 |
| A_23_P500614   | NM_001243       | TNFRSF8        | tumor necrosis factor receptor superfamily, member 8              | ENST00000263932 | -0,613760711 |
| A_23_P155052   | NM_030641       | APOL6          | apolipoprotein L, 6                                               | ENST00000409652 | -0,61383023  |
| A_23_P308722   | NM_145038       | CCDC164        | coiled-coil domain containing 164                                 | ENST00000288710 | -0,613940576 |
| A_23_P10025    | NM_006159       | NELL2          | NEL-like 2 (chicken)                                              | ENST00000437801 | -0,613967065 |
| A_23_P57036    | NM_001250       | CD40           | CD40 molecule, TNF receptor superfamily member 5                  | ENST00000477696 | -0,613977104 |
| A_23_P113161   | NM_030806       | C1orf21        | chromosome 1 open reading frame 21                                | ENST00000235307 | -0,61398659  |
| A_32_P147078   | NM_021097       | SLC8A1         | solute carrier family 8 (sodium/calcium exchanger), membe         | ENST00000542640 | -0,614268547 |
| A_23_P204947   | NM_004004       | GJB2           | gap junction protein, beta 2, 26kDa                               | ENST00000382844 | -0,614305327 |
| A_33_P3306843  | NM_001102657    | ZNF836         | zinc finger protein 836                                           | ENST00000322146 | -0,61436856  |
| A_21_P0011622  | ENST00000495536 | XLOC_I2_005814 |                                                                   | ENST00000495536 | -0,614397439 |
| A_23_P118254   | NM_001451       | FOXF1          | forkhead box F1                                                   | ENST00000262426 | -0,614442436 |
| A_23_P101246   | NM_001163922    | VSIG10L        | V-set and immunoglobulin domain containing 10 like                | ENST00000335624 | -0,614478017 |
| A_21_P0012701  | THC2667912      | XLOC_I2_011411 |                                                                   |                 | -0,61469103  |
| A_33_P3308055  | AB209519        | EIF4E2         | eukaryotic translation initiation factor 4E family member 2       | ENST00000409514 | -0,614714759 |
| A_33_P3258004  | NM_152788       | ANKS1B         | ankyrin repeat and sterile alpha motif domain containing 1E       | ENST00000546960 | -0,614751745 |
| A_23_P138507   | NM_001786       | CDK1           | cyclin-dependent kinase 1                                         | ENST00000448257 | -0,614789601 |
| A_24_P405430   | NM_022173       | TIA1           | TIA1 cytotoxic granule-associated RNA binding protein             | ENST00000477807 | -0,614925811 |
| A_33_P3317253  | NM_001001484    | PTER           | phosphotriesterase related                                        | ENST00000378000 | -0,615204626 |
| A_32_P56001    | NM_012072       | CD93           | CD93 molecule                                                     | ENST00000246006 | -0,615326245 |
| A_21_P0014631  | XR_110832       | LOC100505971   | uncharacterized LOC100505971                                      |                 | -0,615418738 |
| A_24_P753161   | NM_001204       | BMPR2          | bone morphogenetic protein receptor, type II (serine/threo        | ENST00000374580 | -0,615473759 |

|                |                |             |                                                           |                 |              |
|----------------|----------------|-------------|-----------------------------------------------------------|-----------------|--------------|
| A_33_P3214105  | NM_001674      | ATF3        | activating transcription factor 3                         | ENST00000366981 | -0,615475405 |
| A_33_P3210671  | NM_207328      | GPAT2       | glycerol-3-phosphate acyltransferase 2, mitochondrial     | ENST00000458519 | -0,615503087 |
| A_33_P3387155  | NR_002814      | LOC374443   | CLR pseudogene                                            |                 | -0,615760516 |
| A_24_P417162   | NM_005647      | TBL1X       | transducin (beta)-like 1X-linked                          | ENST00000217964 | -0,615910857 |
| A_23_P13907    | NM_000618      | IGF1        | insulin-like growth factor 1 (somatomedin C)              | ENST00000481539 | -0,615921388 |
| A_23_P106389   | NM_003612      | SEMA7A      | semaphorin 7A, GPI membrane anchor (John Milton Hagen)    | ENST00000543145 | -0,616176133 |
| A_33_P3289865  | NM_006226      | PLCL1       | phospholipase C-like 1                                    | ENST00000437704 | -0,616224724 |
| A_21_P0007219  | TCONS_00019322 | XLOC_009167 |                                                           |                 | -0,616796378 |
| A_23_P120845   | NM_005080      | XBP1        | X-box binding protein 1                                   | ENST00000415306 | -0,616987868 |
| A_23_P44274    | NM_000508      | FGA         | fibrinogen alpha chain                                    | ENST00000302053 | -0,616988658 |
| A_23_P218675   | NM_006103      | WFDC2       | WAP four-disulfide core domain 2                          | ENST00000447118 | -0,617372103 |
| A_23_P112554   | NM_001855      | COL15A1     | collagen, type XV, alpha 1                                | ENST00000375001 | -0,617410498 |
| A_23_P107744   | NM_030760      | S1PR5       | sphingosine-1-phosphate receptor 5                        | ENST00000359134 | -0,617519499 |
| A_23_P65427    | NM_002818      | PSME2       | proteasome (prosome, macropain) activator subunit 2 (PA2) | ENST00000216802 | -0,617613241 |
| A_23_P361940   | NM_003874      | CD84        | CD84 molecule                                             | ENST00000368054 | -0,617734222 |
| A_19_P00321317 | THC2509656     | Q39472      |                                                           |                 | -0,61779434  |
| A_24_P187970   | NM_007365      | PADI2       | peptidyl arginine deiminase, type II                      | ENST00000375481 | -0,617967599 |
| A_33_P3332362  | NM_001207026   | POU2F2      | POU class 2 homeobox 2                                    | ENST00000342301 | -0,61801439  |
| A_23_P6535     | NM_138433      | KLHDC7B     | kelch domain containing 7B                                | ENST00000395676 | -0,618187033 |
| A_23_P116829   | NM_003348      | UBE2N       | ubiquitin-conjugating enzyme E2N                          | ENST00000318066 | -0,618389706 |
| A_23_P23639    | NM_153259      | MCOLN2      | mucolipin 2                                               | ENST00000530971 | -0,618402188 |
| A_23_P6293     | NM_018961      | UBASH3A     | ubiquitin associated and SH3 domain containing A          | ENST00000473381 | -0,618403922 |
| A_32_P89310    | NM_001080475   | PLEKHM3     | pleckstrin homology domain containing, family M, member   | ENST00000343987 | -0,61844386  |
| A_23_P354151   | NM_005546      | ITK         | IL2-inducible T-cell kinase                               | ENST00000519402 | -0,618455527 |
| A_33_P3315134  | NR_026597      | DIRC3       | disrupted in renal carcinoma 3                            | ENST00000474063 | -0,618456527 |
| A_33_P3331601  | NM_024838      | THNSL1      | threonine synthase-like 1 (S. cerevisiae)                 | ENST00000524413 | -0,618504073 |
| A_33_P3295200  | NM_001523      | HAS1        | hyaluronan synthase 1                                     | ENST00000376738 | -0,61852376  |
| A_23_P171132   | NM_021783      | EDA2R       | ectodysplasin A2 receptor                                 | ENST00000450752 | -0,618632146 |
| A_23_P66117    | NM_032039      | ITFG3       | integrin alpha FG-GAP repeat containing 3                 | ENST00000301678 | -0,618672401 |



|               |                  |                |                                                        |                 |              |
|---------------|------------------|----------------|--------------------------------------------------------|-----------------|--------------|
| A_23_P141555  | NM_013351        | TBX21          | T-box 21                                               | ENST00000177694 | -0,618939478 |
| A_32_P192970  | NM_170726        | ALDH4A1        | aldehyde dehydrogenase 4 family, member A1             | ENST00000432718 | -0,618952488 |
| A_23_P135499  | NM_013943        | CLIC4          | chloride intracellular channel 4                       | ENST00000374379 | -0,619169043 |
| A_24_P398691  | NM_032859        | ABHD13         | abhydrolase domain containing 13                       | ENST00000375898 | -0,619171482 |
| A_24_P62530   | NM_021205        | RHOU           | ras homolog gene family, member U                      | ENST00000366691 | -0,619836073 |
| A_21_P0008874 | AK056683         | XLOC_011755    |                                                        |                 | -0,619890908 |
| A_21_P0005927 | ENST00000520646  | XLOC_006726    |                                                        | ENST00000520646 | -0,620110679 |
| A_23_P120845  | NM_005080        | XBP1           | X-box binding protein 1                                | ENST00000415306 | -0,620199266 |
| A_23_P100386  | NM_152456        | IL34           | interleukin 34                                         | ENST00000429149 | -0,620212359 |
| A_32_P158966  | NM_016523        | KLRF1          | killer cell lectin-like receptor subfamily F, member 1 | ENST00000535631 | -0,620402004 |
| A_23_P359245  | NM_000245        | MET            | met proto-oncogene (hepatocyte growth factor receptor) | ENST00000397752 | -0,620627352 |
| A_23_P204751  | NM_020039        | ACCN2          | amiloride-sensitive cation channel 2, neuronal         | ENST00000228468 | -0,62065403  |
| A_23_P37441   | NM_004048        | B2M            | beta-2-microglobulin                                   | ENST00000396754 | -0,620989596 |
| A_33_P3372466 | NM_138501        | TECR           | trans-2,3-enoyl-CoA reductase                          | ENST00000444365 | -0,621324608 |
| A_23_P153372  | NM_032855        | HSH2D          | hematopoietic SH2 domain containing                    | ENST00000253680 | -0,621501794 |
| A_23_P110184  | NM_006745        | MSMO1          | methylsterol monooxygenase 1                           | ENST00000393766 | -0,621896369 |
| A_21_P0013513 | TCONS_I2_0002818 | XLOC_I2_014505 |                                                        |                 | -0,621912797 |
| A_24_P343233  | NM_002124        | HLA-DRB1       | major histocompatibility complex, class II, DR beta 1  | ENST00000549627 | -0,621949367 |
| A_33_P3313456 | NM_001098843     | CXorf30        | chromosome X open reading frame 30                     | ENST00000378653 | -0,622111214 |
| A_33_P3253249 | NM_002032        | FTH1           | ferritin, heavy polypeptide 1                          | ENST00000534180 | -0,622121636 |
| A_23_P141208  | NM_015510        | DHRS7B         | dehydrogenase/reductase (SDR family) member 7B         | ENST00000346603 | -0,622156495 |
| A_24_P343233  | NM_002124        | HLA-DRB1       | major histocompatibility complex, class II, DR beta 1  | ENST00000549627 | -0,622356311 |
| A_23_P57036   | NM_001250        | CD40           | CD40 molecule, TNF receptor superfamily member 5       | ENST00000477696 | -0,622808092 |
| A_33_P3262977 | NM_001079858     | GPR64          | G protein-coupled receptor 64                          | ENST00000397917 | -0,622867127 |
| A_23_P50368   | NM_206818        | OSCAR          | osteoclast associated, immunoglobulin-like receptor    | ENST00000358375 | -0,623092979 |
| A_24_P203000  | NM_000878        | IL2RB          | interleukin 2 receptor, beta                           | ENST00000216223 | -0,623286609 |
| A_33_P3217393 | NM_001024736     | CD276          | CD276 molecule                                         | ENST00000379823 | -0,623414485 |
| A_23_P385861  | NM_152562        | CDCA2          | cell division cycle associated 2                       | ENST00000435898 | -0,623521013 |
| A_23_P120845  | NM_005080        | XBP1           | X-box binding protein 1                                | ENST00000415306 | -0,623596482 |

|                |                 |              |                                                                     |                 |              |
|----------------|-----------------|--------------|---------------------------------------------------------------------|-----------------|--------------|
| A_33_P3395442  | NR_015382       | LOC678655    | uncharacterized LOC678655                                           |                 | -0,623727503 |
| A_24_P626850   | NM_004285       | H6PD         | hexose-6-phosphate dehydrogenase (glucose 1-dehydroger              | ENST00000377403 | -0,623775423 |
| A_23_P37441    | NM_004048       | B2M          | beta-2-microglobulin                                                | ENST00000396754 | -0,623893805 |
| A_33_P3369058  | NM_198578       | LRRK2        | leucine-rich repeat kinase 2                                        | ENST00000298910 | -0,62419744  |
| A_23_P363399   | NM_030674       | SLC38A1      | solute carrier family 38, member 1                                  | ENST00000398637 | -0,62456812  |
| A_23_P106389   | NM_003612       | SEMA7A       | semaphorin 7A, GPI membrane anchor (John Milton Hagen               | ENST00000543145 | -0,624768323 |
| A_21_P0004691  | ENST00000434437 | XLOC_005480  |                                                                     | ENST00000434437 | -0,624809747 |
| A_33_P3396527  | NM_006467       | POLR3G       | polymerase (RNA) III (DNA directed) polypeptide G (32kD)            | ENST00000399107 | -0,625325723 |
| A_23_P352266   | NM_000633       | BCL2         | B-cell CLL/lymphoma 2                                               | ENST00000398117 | -0,62534411  |
| A_32_P52911    | NM_018269       | ADI1         | acireductone dioxygenase 1                                          | ENST00000327435 | -0,625372994 |
| A_33_P3275350  | NM_014286       | NCS1         | neuronal calcium sensor 1                                           | ENST00000372398 | -0,625580221 |
| A_33_P3283430  | NM_025229       | SEL1L2       | sel-1 suppressor of lin-12-like 2 (C. elegans)                      | ENST00000423870 | -0,625625755 |
| A_33_P3209591  | NM_004925       | AQP3         | aquaporin 3 (Gill blood group)                                      | ENST00000343952 | -0,625747592 |
| A_24_P343233   | NM_002124       | HLA-DRB1     | major histocompatibility complex, class II, DR beta 1               | ENST00000549627 | -0,625773035 |
| A_23_P143047   | NM_080653       | ATP6V1E2     | ATPase, H <sup>+</sup> transporting, lysosomal 31kDa, V1 subunit E2 | ENST00000522587 | -0,62583544  |
| A_32_P405759   | NM_152888       | COL22A1      | collagen, type XXII, alpha 1                                        | ENST00000435777 | -0,625868213 |
| A_24_P98411    | NM_005347       | HSPA5        | heat shock 70kDa protein 5 (glucose-regulated protein, 78k          | ENST00000324460 | -0,625935719 |
| A_21_P0014024  | ENST00000438418 | LOC100652784 |                                                                     | ENST00000438418 | -0,625991043 |
| A_19_P00808382 | NR_038883       | LOC100506334 | uncharacterized LOC100506334                                        |                 | -0,62601892  |
| A_24_P343233   | NM_002124       | HLA-DRB1     | major histocompatibility complex, class II, DR beta 1               | ENST00000549627 | -0,626087975 |
| A_24_P343233   | NM_002124       | HLA-DRB1     | major histocompatibility complex, class II, DR beta 1               | ENST00000549627 | -0,626132953 |
| A_23_P58407    | NM_001076       | UGT2B15      | UDP glucuronosyltransferase 2 family, polypeptide B15               | ENST00000338206 | -0,626289377 |
| A_21_P0000065  | NM_001166696    | SLC1A3       | solute carrier family 1 (glial high affinity glutamate transpor     | ENST00000512374 | -0,626380305 |
| A_23_P104972   | NM_023945       | MS4A5        | membrane-spanning 4-domains, subfamily A, member 5                  | ENST00000300190 | -0,626547805 |
| A_23_P113701   | NM_002607       | PDGFA        | platelet-derived growth factor alpha polypeptide                    | ENST00000402802 | -0,626687596 |
| A_23_P121480   | NM_001004196    | CD200        | CD200 molecule                                                      | ENST00000478595 | -0,626947857 |
| A_23_P254978   | NM_032026       | TATDN1       | TatD DNase domain containing 1                                      | ENST00000523888 | -0,627040052 |
| A_23_P10506    | NM_014485       | HPGDS        | hematopoietic prostaglandin D synthase                              | ENST00000295256 | -0,627172749 |
| A_24_P16913    | NM_005845       | ABCC4        | ATP-binding cassette, sub-family C (CFTR/MRP), member 4             | ENST00000431522 | -0,627236625 |

|                |                 |                |                                                            |                 |              |
|----------------|-----------------|----------------|------------------------------------------------------------|-----------------|--------------|
| A_23_P105002   | NM_000327       | ROM1           | retinal outer segment membrane protein 1                   | ENST00000278833 | -0,627322887 |
| A_23_P37441    | NM_004048       | B2M            | beta-2-microglobulin                                       | ENST00000396754 | -0,627427798 |
| A_23_P107744   | NM_030760       | S1PR5          | sphingosine-1-phosphate receptor 5                         | ENST00000359134 | -0,627454592 |
| A_23_P138507   | NM_001786       | CDK1           | cyclin-dependent kinase 1                                  | ENST00000448257 | -0,627474693 |
| A_23_P138507   | NM_001786       | CDK1           | cyclin-dependent kinase 1                                  | ENST00000448257 | -0,627516071 |
| A_21_P0013796  | NM_002032       | FTH1           | ferritin, heavy polypeptide 1                              | ENST00000534719 | -0,627586949 |
| A_23_P67042    | NM_017947       | MOCOS          | molybdenum cofactor sulfurase                              | ENST00000261326 | -0,628033429 |
| A_24_P343233   | NM_002124       | HLA-DRB1       | major histocompatibility complex, class II, DR beta 1      | ENST00000549627 | -0,628193761 |
| A_23_P19657    | NM_032832       | LRP11          | low density lipoprotein receptor-related protein 11        | ENST00000239367 | -0,628313098 |
| A_23_P416238   | NM_139249       | MS4A6E         | membrane-spanning 4-domains, subfamily A, member 6E        | ENST00000532756 | -0,628343626 |
| A_21_P0009153  | BC084573        | XLOC_012452    |                                                            |                 | -0,628510621 |
| A_23_P109913   | NM_006564       | CXCR6          | chemokine (C-X-C motif) receptor 6                         | ENST00000438735 | -0,628556061 |
| A_23_P37441    | NM_004048       | B2M            | beta-2-microglobulin                                       | ENST00000396754 | -0,628576043 |
| A_23_P351148   | NM_053282       | SH2D1B         | SH2 domain containing 1B                                   | ENST00000359567 | -0,62857646  |
| A_23_P37441    | NM_004048       | B2M            | beta-2-microglobulin                                       | ENST00000396754 | -0,628603323 |
| A_23_P58321    | NM_001237       | CCNA2          | cyclin A2                                                  | ENST00000274026 | -0,628713672 |
| A_23_P421011   | NM_030929       | KAZALD1        | Kazal-type serine peptidase inhibitor domain 1             | ENST00000370200 | -0,62874207  |
| A_23_P109913   | NM_006564       | CXCR6          | chemokine (C-X-C motif) receptor 6                         | ENST00000438735 | -0,628895619 |
| A_19_P00322409 | NR_034115       | LOC729178      | uncharacterized LOC729178                                  |                 | -0,628959935 |
| A_21_P0010787  | ENST00000446962 | XLOC_I2_001302 |                                                            | ENST00000446962 | -0,629004828 |
| A_23_P10506    | NM_014485       | HPGDS          | hematopoietic prostaglandin D synthase                     | ENST00000295256 | -0,629108446 |
| A_24_P343233   | NM_002124       | HLA-DRB1       | major histocompatibility complex, class II, DR beta 1      | ENST00000549627 | -0,629272138 |
| A_23_P166297   | NM_207627       | ABCG1          | ATP-binding cassette, sub-family G (WHITE), member 1       | ENST00000340588 | -0,629534802 |
| A_33_P3272090  | NM_001198834    | PDE4DIP        | phosphodiesterase 4D interacting protein                   | ENST00000530062 | -0,629743041 |
| A_23_P37441    | NM_004048       | B2M            | beta-2-microglobulin                                       | ENST00000396754 | -0,629804866 |
| A_33_P3386429  | NM_015571       | SENPE6         | SUMO1/sentrin specific peptidase 6                         | ENST00000447266 | -0,629821654 |
| A_23_P118834   | NM_001067       | TOP2A          | topoisomerase (DNA) II alpha 170kDa                        | ENST00000269577 | -0,630009402 |
| A_23_P357104   | NM_001155       | ANXA6          | annexin A6                                                 | ENST00000540153 | -0,630189775 |
| A_23_P26994    | NM_031498       | GNGT2          | guanine nucleotide binding protein (G protein), gamma trar | ENST00000515635 | -0,630412802 |

|                |                 |                |                                                                 |                 |              |
|----------------|-----------------|----------------|-----------------------------------------------------------------|-----------------|--------------|
| A_19_P00800681 | XR_110300       | LOC100506965   | uncharacterized LOC100506965                                    |                 | -0,630412898 |
| A_23_P71530    | NM_002546       | TNFRSF11B      | tumor necrosis factor receptor superfamily, member 11b          | ENST00000521597 | -0,630526037 |
| A_24_P343233   | NM_002124       | HLA-DRB1       | major histocompatibility complex, class II, DR beta 1           | ENST00000549627 | -0,630706017 |
| A_24_P343233   | NM_002124       | HLA-DRB1       | major histocompatibility complex, class II, DR beta 1           | ENST00000549627 | -0,630724738 |
| A_23_P57036    | NM_001250       | CD40           | CD40 molecule, TNF receptor superfamily member 5                | ENST00000477696 | -0,630749325 |
| A_24_P318656   | NM_000212       | ITGB3          | integrin, beta 3 (platelet glycoprotein IIIa, antigen CD61)     | ENST00000262017 | -0,631072481 |
| A_24_P117410   | NM_138433       | KLHDC7B        | kelch domain containing 7B                                      | ENST00000395676 | -0,631140147 |
| A_33_P3413840  | NM_001205019    | GK             | glycerol kinase                                                 | ENST00000378945 | -0,631194743 |
| A_21_P0013056  | THC2730466      | XLOC_I2_012847 |                                                                 |                 | -0,631229376 |
| A_33_P3318966  | NM_173802       | METTL20        | methyltransferase like 20                                       | ENST00000395763 | -0,631337885 |
| A_23_P138507   | NM_001786       | CDK1           | cyclin-dependent kinase 1                                       | ENST00000448257 | -0,631384442 |
| A_23_P359043   | NM_001004065    | AKAP2          | A kinase (PRKA) anchor protein 2                                | ENST00000374530 | -0,631407226 |
| A_24_P943358   | NM_006716       | DBF4           | DBF4 homolog ( <i>S. cerevisiae</i> )                           | ENST00000265728 | -0,631431548 |
| A_32_P163089   | NM_001145199    | C12orf75       | chromosome 12 open reading frame 75                             | ENST00000548472 | -0,631530906 |
| A_23_P100386   | NM_152456       | IL34           | interleukin 34                                                  | ENST00000429149 | -0,631618587 |
| A_21_P0006297  | ENST00000474602 | CDC14B         | CDC14 cell division cycle 14 homolog B ( <i>S. cerevisiae</i> ) | ENST00000474602 | -0,631682358 |
| A_23_P64173    | NM_001017534    | CARD16         | caspase recruitment domain family, member 16                    | ENST00000525374 | -0,6316973   |
| A_23_P56213    | NM_020895       | GRAMD1A        | GRAM domain containing 1A                                       | ENST00000411896 | -0,631716473 |
| A_23_P416178   | NM_022742       | CCDC136        | coiled-coil domain containing 136                               | ENST00000471729 | -0,631800424 |
| A_33_P3229467  | NM_004760       | STK17A         | serine/threonine kinase 17a                                     |                 | -0,631922096 |
| A_33_P3314659  | NM_144722       | SPEF2          | sperm flagellar 2                                               | ENST00000282469 | -0,632041741 |
| A_33_P3375368  | NM_001195381    | GPR35          | G protein-coupled receptor 35                                   | ENST00000407714 | -0,632042305 |
| A_24_P940921   | NM_015046       | SETX           | senataxin                                                       | ENST00000372169 | -0,632083582 |
| A_24_P405205   | NM_001001396    | ATP2B4         | ATPase, Ca <sup>++</sup> transporting, plasma membrane 4        | ENST00000367218 | -0,632099395 |
| A_21_P0012685  | ENST00000511213 | XLOC_I2_011291 |                                                                 | ENST00000511213 | -0,632162688 |
| A_23_P315364   | NM_002089       | CXCL2          | chemokine (C-X-C motif) ligand 2                                | ENST00000508487 | -0,63227383  |
| A_23_P120845   | NM_005080       | XBP1           | X-box binding protein 1                                         | ENST00000415306 | -0,632289109 |
| A_23_P120467   | NM_199427       | ZFP64          | zinc finger protein 64 homolog (mouse)                          | ENST00000361387 | -0,632613688 |
| A_24_P11315    | NM_020190       | OLFML3         | olfactomedin-like 3                                             | ENST00000393300 | -0,632708504 |

|               |              |              |                                                              |                 |              |
|---------------|--------------|--------------|--------------------------------------------------------------|-----------------|--------------|
| A_23_P113777  | NM_004791    | ITGBL1       | integrin, beta-like 1 (with EGF-like repeat domains)         | ENST00000376162 | -0,632784585 |
| A_23_P110184  | NM_006745    | MSMO1        | methylsterol monooxygenase 1                                 | ENST00000393766 | -0,632824068 |
| A_33_P3338121 | NM_001017402 | LAMB3        | laminin, beta 3                                              | ENST00000367030 | -0,63284896  |
| A_23_P11201   | NM_001097579 | GPR34        | G protein-coupled receptor 34                                | ENST00000535368 | -0,632865928 |
| A_23_P37441   | NM_004048    | B2M          | beta-2-microglobulin                                         | ENST00000396754 | -0,632937277 |
| A_23_P126752  | NM_004930    | CAPZB        | capping protein (actin filament) muscle Z-line, beta         | ENST00000375145 | -0,633490766 |
| A_23_P153853  | NM_001398    | ECH1         | enoyl CoA hydratase 1, peroxisomal                           | ENST00000221418 | -0,633734079 |
| A_23_P1014    | NR_026761    | LINC00467    | long intergenic non-protein coding RNA 467                   |                 | -0,633863676 |
| A_21_P0000818 | NR_038847    | LOC100505576 | uncharacterized LOC100505576                                 |                 | -0,633878758 |
| A_23_P211401  | NM_001039570 | KREMEN1      | kringle containing transmembrane protein 1                   | ENST00000407188 | -0,633921614 |
| A_23_P1014    | NR_026761    | LINC00467    | long intergenic non-protein coding RNA 467                   |                 | -0,633922862 |
| A_24_P365526  | NM_002110    | HCK          | hemopoietic cell kinase                                      | ENST00000375862 | -0,633966521 |
| A_23_P37983   | NM_005947    | MT1B         | metallothionein 1B                                           | ENST00000334346 | -0,633988382 |
| A_24_P123119  | NM_001966    | EHHADH       | enoyl-CoA, hydratase/3-hydroxyacyl CoA dehydrogenase         | ENST00000231887 | -0,634121297 |
| A_23_P91095   | NM_006139    | CD28         | CD28 molecule                                                | ENST00000374481 | -0,634185223 |
| A_23_P111995  | NM_002318    | LOXL2        | lysyl oxidase-like 2                                         | ENST00000389131 | -0,634194334 |
| A_33_P3369567 | NM_001242932 | LSP1         | lymphocyte-specific protein 1                                | ENST00000484895 | -0,634208633 |
| A_23_P96158   | NM_000422    | KRT17        | keratin 17                                                   | ENST00000493253 | -0,634217768 |
| A_21_P0006239 | XR_109854    | LOC100506532 | uncharacterized LOC100506532                                 |                 | -0,634353946 |
| A_23_P151710  | NM_000956    | PTGER2       | prostaglandin E receptor 2 (subtype EP2), 53kDa              | ENST00000245457 | -0,634357639 |
| A_23_P156180  | NM_003059    | SLC22A4      | solute carrier family 22 (organic cation/ergothioneine trans | ENST00000200652 | -0,634411964 |
| A_24_P161018  | NM_017554    | PARP14       | poly (ADP-ribose) polymerase family, member 14               | ENST00000310290 | -0,634418958 |
| A_21_P0000138 | NM_001197238 | BTN2A2       | butyrophilin, subfamily 2, member A2                         | ENST00000469230 | -0,634444558 |
| A_23_P120845  | NM_005080    | XBP1         | X-box binding protein 1                                      | ENST00000415306 | -0,634450367 |
| A_33_P3213029 | NM_017763    | RNF43        | ring finger protein 43                                       | ENST00000407977 | -0,634489169 |
| A_23_P137366  | NM_000491    | C1QB         | complement component 1, q subcomponent, B chain              | ENST00000314933 | -0,634701633 |
| A_23_P106602  | NM_031476    | CRISPLD2     | cysteine-rich secretory protein LCCL domain containing 2     | ENST00000262424 | -0,634779915 |
| A_23_P120845  | NM_005080    | XBP1         | X-box binding protein 1                                      | ENST00000415306 | -0,634853389 |
| A_33_P3313283 | NM_153221    | CILP2        | cartilage intermediate layer protein 2                       | ENST00000291495 | -0,635074929 |



|                |                 |                |                                                                |                 |              |
|----------------|-----------------|----------------|----------------------------------------------------------------|-----------------|--------------|
| A_24_P140608   | NM_001945       | HBEGF          | heparin-binding EGF-like growth factor                         | ENST00000507104 | -0,635202453 |
| A_24_P295379   | NM_020960       | GPR107         | G protein-coupled receptor 107                                 | ENST00000372406 | -0,63521821  |
| A_19_P00805954 | TCONS_00011660  | XLOC_005143    |                                                                |                 | -0,635238321 |
| A_23_P203957   | NM_175861       | TMTC1          | transmembrane and tetratricopeptide repeat containing 1        | ENST00000319685 | -0,635312715 |
| A_23_P49499    | NM_006456       | ST6GALNAC2     | ST6 (alpha-N-acetyl-neuraminyl-2,3-beta-galactosyl-1,3)-N-:    | ENST00000225276 | -0,635435186 |
| A_32_P129419   | NM_024611       | NARG2          | NMDA receptor regulated 2                                      | ENST00000261520 | -0,635640158 |
| A_23_P139669   | NM_006931       | SLC2A3         | solute carrier family 2 (facilitated glucose transporter), men | ENST00000479059 | -0,635660596 |
| A_23_P423331   | NM_032536       | NTNG2          | netrin G2                                                      | ENST00000360670 | -0,636363079 |
| A_23_P117602   | NM_004131       | GZMB           | granzyme B (granzyme 2, cytotoxic T-lymphocyte-associated      | ENST00000554242 | -0,636395236 |
| A_23_P37441    | NM_004048       | B2M            | beta-2-microglobulin                                           | ENST00000396754 | -0,63641539  |
| A_33_P3367550  | NR_033379       | LOC401242      | uncharacterized LOC401242                                      | ENST00000411600 | -0,636468475 |
| A_23_P369815   | NM_000639       | FASLG          | Fas ligand (TNF superfamily, member 6)                         | ENST00000367721 | -0,636613938 |
| A_23_P1014     | NR_026761       | LINC00467      | long intergenic non-protein coding RNA 467                     |                 | -0,636615442 |
| A_23_P101246   | NM_001163922    | VSIG10L        | V-set and immunoglobulin domain containing 10 like             | ENST00000335624 | -0,636729959 |
| A_23_P120845   | NM_005080       | XBP1           | X-box binding protein 1                                        | ENST00000415306 | -0,63682929  |
| A_24_P923251   | NM_198951       | TGM2           | transglutaminase 2 (C polypeptide, protein-glutamine-gamr      | ENST00000468262 | -0,636898842 |
| A_23_P371076   | ENST00000472022 | KLF12          | Kruppel-like factor 12                                         | ENST00000472022 | -0,636960044 |
| A_24_P915806   | NM_001024074    | HNMT           | histamine N-methyltransferase                                  | ENST00000280096 | -0,637023112 |
| A_23_P402319   | NM_152687       | GAPT           | GRB2-binding adaptor protein, transmembrane                    | ENST00000318469 | -0,637317603 |
| A_23_P12746    | NM_002438       | MRC1           | mannose receptor, C type 1                                     | ENST00000239761 | -0,637358829 |
| A_23_P1014     | NR_026761       | LINC00467      | long intergenic non-protein coding RNA 467                     |                 | -0,637384766 |
| A_33_P3223503  | NM_023037       | FRY            | furry homolog (Drosophila)                                     | ENST00000380217 | -0,637576899 |
| A_33_P3292769  | NM_145912       | NFAM1          | NFAT activating protein with ITAM motif 1                      | ENST00000329021 | -0,637663283 |
| A_33_P3250398  | BC025419        | CTSZ           | cathepsin Z                                                    |                 | -0,6377139   |
| A_24_P348806   | NM_175058       | PLEKHA7        | pleckstrin homology domain containing, family A member 7       | ENST00000448080 | -0,637823072 |
| A_32_P175934   | NM_001778       | CD48           | CD48 molecule                                                  | ENST00000368046 | -0,637840401 |
| A_32_P60065    | NM_004101       | F2RL2          | coagulation factor II (thrombin) receptor-like 2               | ENST00000296641 | -0,637847178 |
| A_21_P0011983  | ENST00000432711 | XLOC_I2_008396 |                                                                | ENST00000432711 | -0,637886173 |
| A_24_P89457    | NM_078467       | CDKN1A         | cyclin-dependent kinase inhibitor 1A (p21, Cip1)               | ENST00000478800 | -0,638011469 |

|                |                  |                |                                                              |                 |              |
|----------------|------------------|----------------|--------------------------------------------------------------|-----------------|--------------|
| A_23_P38446    | NM_021137        | TNFAIP1        | tumor necrosis factor, alpha-induced protein 1 (endothelial  | ENST00000226225 | -0,638041099 |
| A_19_P00322332 | XR_111691        | LOC100508196   | uncharacterized LOC100508196                                 |                 | -0,638236976 |
| A_19_P00319800 | NR_040074        | LOC100287225   | uncharacterized LOC100287225                                 | ENST00000435144 | -0,638306736 |
| A_32_P62997    | NM_018492        | PBK            | PDZ binding kinase                                           | ENST00000301905 | -0,6383379   |
| A_33_P3376958  | NR_027293        | LOC96610       | BMS1 homolog, ribosome assembly protein (yeast) pseudo       | ENST00000390290 | -0,638589287 |
| A_23_P106389   | NM_003612        | SEMA7A         | semaphorin 7A, GPI membrane anchor (John Milton Hagen        | ENST00000543145 | -0,638706072 |
| A_23_P1014     | NR_026761        | LINC00467      | long intergenic non-protein coding RNA 467                   |                 | -0,638880815 |
| A_33_P3310104  | NM_002639        | SERPINB5       | serpin peptidase inhibitor, clade B (ovalbumin), member 5    | ENST00000382771 | -0,638998207 |
| A_21_P0013652  | TCONS_I2_0002934 | XLOC_I2_015213 |                                                              |                 | -0,639371112 |
| A_33_P3262416  | NM_001141972     | ATPBD4         | ATP binding domain 4                                         | ENST00000440392 | -0,639534154 |
| A_24_P241183   | NM_013269        | CLEC2D         | C-type lectin domain family 2, member D                      | ENST00000487752 | -0,639793175 |
| A_21_P0005691  | ENST00000521257  | XLOC_006780    |                                                              | ENST00000521257 | -0,639867038 |
| A_21_P0011543  | TCONS_I2_0001077 | XLOC_I2_005787 |                                                              |                 | -0,639894999 |
| A_23_P77590    | NM_018052        | VAC14          | Vac14 homolog (S. cerevisiae)                                | ENST00000536184 | -0,639995395 |
| A_33_P3463355  | BC039302         | LOC286121      | uncharacterized LOC286121                                    |                 | -0,64034785  |
| A_19_P00809624 | NM_001145191     | FAM200B        |                                                              | ENST00000504137 | -0,640557712 |
| A_23_P404108   | NM_018999        | FAM190B        | family with sequence similarity 190, member B                | ENST00000224756 | -0,640667437 |
| A_24_P21507    | NM_172242        | SPAG6          | sperm associated antigen 6                                   | ENST00000376603 | -0,640692496 |
| A_21_P0002359  | TCONS_00004035   | XLOC_001873    |                                                              |                 | -0,640761925 |
| A_33_P3239839  | NM_024963        | FBXL18         | F-box and leucine-rich repeat protein 18                     | ENST00000538679 | -0,640808611 |
| A_23_P34093    | NM_000402        | G6PD           | glucose-6-phosphate dehydrogenase                            | ENST00000369620 | -0,640921439 |
| A_23_P169257   | NM_001244        | TNFSF8         | tumor necrosis factor (ligand) superfamily, member 8         | ENST00000223795 | -0,641146883 |
| A_33_P3623118  | AK054653         | LOC153577      | uncharacterized LOC153577                                    |                 | -0,641263158 |
| A_23_P120845   | NM_005080        | XBP1           | X-box binding protein 1                                      | ENST00000415306 | -0,64128777  |
| A_33_P3333960  | NR_024464        | LINC00426      | long intergenic non-protein coding RNA 426                   | ENST00000447147 | -0,641301899 |
| A_23_P120845   | NM_005080        | XBP1           | X-box binding protein 1                                      | ENST00000415306 | -0,641337272 |
| A_23_P12082    | NM_001025199     | CHI3L2         | chitinase 3-like 2                                           | ENST00000369748 | -0,641589308 |
| A_24_P169013   | NR_001298        | HLA-DRB6       | major histocompatibility complex, class II, DR beta 6 (pseud | ENST00000437183 | -0,641668931 |
| A_21_P0013873  | ENST00000427671  | XLOC_I2_015842 |                                                              | ENST00000427671 | -0,641676358 |

|               |                  |                |                                                                           |                 |              |
|---------------|------------------|----------------|---------------------------------------------------------------------------|-----------------|--------------|
| A_23_P31896   | NM_003033        | ST3GAL1        | ST3 beta-galactoside alpha-2,3-sialyltransferase 1                        | ENST00000522652 | -0,641697745 |
| A_23_P101246  | NM_001163922     | VSIG10L        | V-set and immunoglobulin domain containing 10 like                        | ENST00000335624 | -0,641799299 |
| A_33_P3278043 | NM_152292        | RG9MTD2        | RNA (guanine-9-) methyltransferase domain containing 2                    | ENST00000394876 | -0,641839528 |
| A_21_P0012272 | TCONS_I2_0001783 | XLOC_I2_009439 |                                                                           |                 | -0,642034665 |
| A_23_P58321   | NM_001237        | CCNA2          | cyclin A2                                                                 | ENST00000274026 | -0,642148009 |
| A_21_P0011002 | THC2717621       | XLOC_I2_002502 |                                                                           |                 | -0,642351727 |
| A_33_P3413701 | NM_001040458     | ERAP1          | endoplasmic reticulum aminopeptidase 1                                    | ENST00000443439 | -0,642386198 |
| A_32_P91902   | NM_030927        | TSPAN14        | tetraspanin 14                                                            | ENST00000429989 | -0,642389268 |
| A_23_P256956  | NM_005733        | KIF20A         | kinesin family member 20A                                                 | ENST00000502338 | -0,642414845 |
| A_32_P197561  | NM_024007        | EBF1           | early B-cell factor 1                                                     | ENST00000313708 | -0,642534602 |
| A_23_P101246  | NM_001163922     | VSIG10L        | V-set and immunoglobulin domain containing 10 like                        | ENST00000335624 | -0,642616428 |
| A_23_P34597   | NM_001785        | CDA            | cytidine deaminase                                                        | ENST00000461985 | -0,642654402 |
| A_21_P0010561 | NM_001244910     | FCGR1B         | Fc fragment of IgG, high affinity Ib, receptor (CD64)                     | ENST00000369178 | -0,642668226 |
| A_23_P99452   | NM_000059        | BRCA2          | breast cancer 2, early onset                                              | ENST00000380152 | -0,643076849 |
| A_33_P3223923 | NM_005313        | PDIA3          | protein disulfide isomerase family A, member 3                            | ENST00000300289 | -0,643159344 |
| A_23_P351467  | NR_002174        | CMAHP          | cytidine monophospho-N-acetylneuraminic acid hydroxylase                  | ENST00000471416 | -0,643211928 |
| A_21_P0004773 | NR_038863        | LOC285758      | uncharacterized LOC285758                                                 |                 | -0,643227278 |
| A_23_P108823  | NM_032523        | OSBPL6         | oxysterol binding protein-like 6                                          | ENST00000315022 | -0,643257009 |
| A_23_P301942  | NM_024409        | NPPC           | natriuretic peptide C                                                     | ENST00000295440 | -0,64327673  |
| A_23_P121222  | NM_020165        | RAD18          | RAD18 homolog ( <i>S. cerevisiae</i> )                                    | ENST00000264926 | -0,643349877 |
| A_23_P29953   | NM_172175        | IL15           | interleukin 15                                                            | ENST00000320650 | -0,643408265 |
| A_23_P37441   | NM_004048        | B2M            | beta-2-microglobulin                                                      | ENST00000396754 | -0,643671711 |
| A_23_P252740  | NM_024094        | DSCC1          | defective in sister chromatid cohesion 1 homolog ( <i>S. cerevisiae</i> ) | ENST00000313655 | -0,643683448 |
| A_23_P37441   | NM_004048        | B2M            | beta-2-microglobulin                                                      | ENST00000396754 | -0,644030812 |
| A_23_P106389  | NM_003612        | SEMA7A         | semaphorin 7A, GPI membrane anchor (John Milton Hagen)                    | ENST00000543145 | -0,644051447 |
| A_32_P43812   | NM_001040402     | DCUN1D4        | DCN1, defective in cullin neddylation 1, domain containing 4              | ENST00000477560 | -0,644087799 |
| A_23_P109913  | NM_006564        | CXCR6          | chemokine (C-X-C motif) receptor 6                                        | ENST00000438735 | -0,64444517  |
| A_23_P1014    | NR_026761        | LINC00467      | long intergenic non-protein coding RNA 467                                |                 | -0,644524202 |
| A_33_P3242503 | NM_199451        | ZNF365         | zinc finger protein 365                                                   | ENST00000410046 | -0,644603477 |

|                |                                 |                |                                                              |                 |              |
|----------------|---------------------------------|----------------|--------------------------------------------------------------|-----------------|--------------|
| A_21_P0004601  | AY314751                        | TSG1           | tumor suppressor TSG1                                        |                 | -0,644617728 |
| A_19_P00318679 | THC2512099                      | XLOC_011510    |                                                              |                 | -0,644839494 |
| A_21_P0005432  | TCONS_00013598                  | XLOC_006252    |                                                              |                 | -0,644842024 |
| A_21_P0007177  | ENST00000531749                 | XLOC_009070    |                                                              | ENST00000531749 | -0,644872372 |
| A_23_P121480   | NM_001004196                    | CD200          | CD200 molecule                                               | ENST00000478595 | -0,644992158 |
| A_33_P3337901  | NM_001198834                    | PDE4DIP        | phosphodiesterase 4D interacting protein                     | ENST00000494734 | -0,645073421 |
| A_23_P32165    | NM_004789                       | LHX2           | LIM homeobox 2                                               | ENST00000373615 | -0,645083211 |
| A_21_P0003999  | THC2620722                      | XLOC_004382    |                                                              |                 | -0,645180594 |
| A_23_P57036    | NM_001250                       | CD40           | CD40 molecule, TNF receptor superfamily member 5             | ENST00000477696 | -0,645251641 |
| A_23_P57036    | NM_001250                       | CD40           | CD40 molecule, TNF receptor superfamily member 5             | ENST00000477696 | -0,645417304 |
| A_23_P102017   | NM_020711                       | ERMN           | ermin, ERM-like protein                                      | ENST00000397283 | -0,645440111 |
| A_21_P0009204  | BX648922                        | XLOC_012583    |                                                              |                 | -0,645506723 |
| A_23_P71530    | NM_002546                       | TNFRSF11B      | tumor necrosis factor receptor superfamily, member 11b       | ENST00000521597 | -0,645526024 |
| A_23_P1691     | NM_002421                       | MMP1           | matrix metalloproteinase 1 (interstitial collagenase)        | ENST00000315274 | -0,645659783 |
| A_23_P103486   | NM_000775                       | CYP2J2         | cytochrome P450, family 2, subfamily J, polypeptide 2        | ENST00000469406 | -0,645843554 |
| A_21_P0012224  | ENST00000449602                 | XLOC_I2_009140 |                                                              | ENST00000449602 | -0,646214705 |
| A_23_P26854    | NM_014859                       | ARHGAP44       | Rho GTPase activating protein 44                             | ENST00000379672 | -0,646240688 |
| A_23_P122976   | NM_002069                       | GNAI1          | guanine nucleotide binding protein (G protein), alpha inhibi | ENST00000351004 | -0,646556874 |
| A_23_P204947   | NM_004004                       | GJB2           | gap junction protein, beta 2, 26kDa                          | ENST00000382844 | -0,646585591 |
| A_24_P286054   | NM_001105251                    | ZFYVE16        | zinc finger, FYVE domain containing 16                       | ENST00000512907 | -0,64666361  |
| A_21_P0014763  | XR_132529                       | LOC100652839   |                                                              |                 | -0,646834813 |
| A_21_P0007850  | AK092411                        | XLOC_009869    |                                                              |                 | -0,646890288 |
| A_23_P99452    | NM_000059                       | BRCA2          | breast cancer 2, early onset                                 | ENST00000380152 | -0,647044136 |
| A_23_P59718    | NM_003130                       | SRI            | sorcin                                                       | ENST00000265729 | -0,647102378 |
| A_21_P0011761  | NR_003578                       | ZNF702P        | zinc finger protein 702, pseudogene                          | ENST00000270443 | -0,647235322 |
| A_23_P151405   | NM_018204                       | CKAP2          | cytoskeleton associated protein 2                            | ENST00000258607 | -0,647236617 |
| A_23_P10182    | NM_003500                       | ACOX2          | acyl-CoA oxidase 2, branched chain                           | ENST00000460921 | -0,64753777  |
| A_23_P120316   | NM_006636                       | MTHFD2         | methylenetetrahydrofolate dehydrogenase (NADP+ depend        | ENST00000394053 | -0,647552675 |
| A_21_P0010848  | TCONS_I2_0000333(XLOC_I2_001800 |                |                                                              |                 | -0,647577683 |

|               |              |              |                                                            |                 |              |
|---------------|--------------|--------------|------------------------------------------------------------|-----------------|--------------|
| A_23_P204947  | NM_004004    | GJB2         | gap junction protein, beta 2, 26kDa                        | ENST00000382844 | -0,647684347 |
| A_23_P20392   | NM_015310    | PSD3         | pleckstrin and Sec7 domain containing 3                    | ENST00000440756 | -0,647745522 |
| A_33_P3405168 | NM_172250    | MMAA         | methylmalonic aciduria (cobalamin deficiency) cblA type    | ENST00000281317 | -0,647849358 |
| A_33_P3774867 | BC094703     | MGC11082     | uncharacterized LOC84777                                   |                 | -0,6478653   |
| A_21_P0014434 | XR_109768    | LOC100506901 | uncharacterized LOC100506901                               |                 | -0,647975829 |
| A_23_P103617  | NM_003568    | ANXA9        | annexin A9                                                 | ENST00000368947 | -0,647980616 |
| A_23_P118254  | NM_001451    | FOXF1        | forkhead box F1                                            | ENST00000262426 | -0,648219851 |
| A_23_P2492    | NM_001734    | C1S          | complement component 1, s subcomponent                     | ENST00000360817 | -0,648473583 |
| A_32_P213661  | NM_144974    | CCDC122      | coiled-coil domain containing 122                          | ENST00000470137 | -0,648841815 |
| A_24_P191847  | NM_024754    | PTCD2        | pentatricopeptide repeat domain 2                          | ENST00000515198 | -0,648872657 |
| A_23_P10182   | NM_003500    | ACOX2        | acyl-CoA oxidase 2, branched chain                         | ENST00000460921 | -0,648912778 |
| A_23_P147918  | NM_080388    | S100A16      | S100 calcium binding protein A16                           | ENST00000368703 | -0,648925581 |
| A_23_P110184  | NM_006745    | MSMO1        | methylsterol monooxygenase 1                               | ENST00000393766 | -0,648929142 |
| A_23_P74359   | NM_004078    | CSRP1        | cysteine and glycine-rich protein 1                        | ENST00000340006 | -0,649029101 |
| A_23_P57036   | NM_001250    | CD40         | CD40 molecule, TNF receptor superfamily member 5           | ENST00000477696 | -0,649493016 |
| A_33_P3386547 | NM_152386    | SGPP2        | sphingosine-1-phosphate phosphatase 2                      | ENST00000321276 | -0,649553073 |
| A_23_P10182   | NM_003500    | ACOX2        | acyl-CoA oxidase 2, branched chain                         | ENST00000460921 | -0,64960578  |
| A_23_P120103  | NM_002252    | KCNS3        | potassium voltage-gated channel, delayed-rectifier, subfam | ENST00000403915 | -0,649611535 |
| A_23_P111000  | NM_002800    | PSMB9        | proteasome (prosome, macropain) subunit, beta type, 9 (la  | ENST00000413480 | -0,649622928 |
| A_23_P119102  | NM_003370    | VASP         | vasodilator-stimulated phosphoprotein                      | ENST00000245932 | -0,649703746 |
| A_23_P202837  | NM_053056    | CCND1        | cyclin D1                                                  | ENST00000227507 | -0,650007956 |
| A_23_P57036   | NM_001250    | CD40         | CD40 molecule, TNF receptor superfamily member 5           | ENST00000477696 | -0,650129615 |
| A_23_P120316  | NM_006636    | MTHFD2       | methylenetetrahydrofolate dehydrogenase (NADP+ depend      | ENST00000394053 | -0,650509613 |
| A_23_P71530   | NM_002546    | TNFRSF11B    | tumor necrosis factor receptor superfamily, member 11b     | ENST00000521597 | -0,650693131 |
| A_33_P3358104 | NM_181449    | CD300E       | CD300e molecule                                            | ENST00000412268 | -0,650712479 |
| A_23_P30069   | NM_001012967 | DDX60L       | DEAD (Asp-Glu-Ala-Asp) box polypeptide 60-like             | ENST00000511577 | -0,650869448 |
| A_23_P118834  | NM_001067    | TOP2A        | topoisomerase (DNA) II alpha 170kDa                        | ENST00000269577 | -0,651161356 |
| A_23_P159406  | NM_003125    | SPRR1B       | small proline-rich protein 1B                              | ENST00000307098 | -0,651211258 |
| A_33_P3371402 | NR_027402    | LINC00204B   | long intergenic non-protein coding RNA 204B                |                 | -0,651268104 |



|                |                |              |                                                        |                 |  |              |
|----------------|----------------|--------------|--------------------------------------------------------|-----------------|--|--------------|
| A_21_P0009311  | TCONS_00025609 | XLOC_012441  |                                                        |                 |  | -0,651309745 |
| A_19_P00810227 | TCONS_00022559 | XLOC_010879  |                                                        |                 |  | -0,651353107 |
| A_23_P1691     | NM_002421      | MMP1         | matrix metalloproteinase 1 (interstitial collagenase)  | ENST00000315274 |  | -0,651376031 |
| A_23_P422981   | NM_174899      | FBXO36       | F-box protein 36                                       | ENST00000283946 |  | -0,65143022  |
| A_33_P3247042  | NM_002030      | FPR3         | formyl peptide receptor 3                              | ENST00000339223 |  | -0,651491237 |
| A_24_P53282    | NM_001304      | CPD          | carboxypeptidase D                                     | ENST00000225719 |  | -0,651537436 |
| A_33_P3381235  | NR_024470      | LOC100127888 | uncharacterized LOC100127888                           | ENST00000411824 |  | -0,651591232 |
| A_24_P81298    | NM_001123355   | PPP6C        | protein phosphatase 6, catalytic subunit               | ENST00000373547 |  | -0,651604853 |
| A_23_P38784    | NM_014385      | SIGLEC7      | sialic acid binding Ig-like lectin 7                   | ENST00000317643 |  | -0,651687188 |
| A_23_P119102   | NM_003370      | VASP         | vasodilator-stimulated phosphoprotein                  | ENST00000245932 |  | -0,651732604 |
| A_33_P3234202  | NM_004944      | DNASE1L3     | deoxyribonuclease I-like 3                             | ENST00000394549 |  | -0,651989328 |
| A_23_P57036    | NM_001250      | CD40         | CD40 molecule, TNF receptor superfamily member 5       | ENST00000477696 |  | -0,652211768 |
| A_23_P352266   | NM_000633      | BCL2         | B-cell CLL/lymphoma 2                                  | ENST00000398117 |  | -0,652259034 |
| A_33_P3336422  | NR_034137      | LOC729013    | uncharacterized LOC729013                              |                 |  | -0,652322938 |
| A_23_P202837   | NM_053056      | CCND1        | cyclin D1                                              | ENST00000227507 |  | -0,652534063 |
| A_33_P3398548  | NM_003666      | BLZF1        | basic leucine zipper nuclear factor 1                  | ENST00000329281 |  | -0,652614074 |
| A_33_P3283964  | NR_033740      | CES1P2       | carboxylesterase 1 pseudogene 2                        |                 |  | -0,652651972 |
| A_23_P162165   | NM_023930      | KCTD14       | potassium channel tetramerisation domain containing 14 | ENST00000353172 |  | -0,65268155  |
| A_19_P00319917 | NR_038956      | LOC100506714 | uncharacterized LOC100506714                           |                 |  | -0,652886846 |
| A_24_P313418   | NM_002990      | CCL22        | chemokine (C-C motif) ligand 22                        | ENST00000219235 |  | -0,652937926 |
| A_21_P0002253  | BC036617       | XLOC_001558  |                                                        |                 |  | -0,652953456 |
| A_32_P74752    | NR_038929      | LOC100131289 | uncharacterized LOC100131289                           |                 |  | -0,653170335 |
| A_32_P56249    | NR_038996      | LOC100131733 | uncharacterized LOC100131733                           | ENST00000478808 |  | -0,653247556 |
| A_23_P137423   | NM_052868      | IGSF8        | immunoglobulin superfamily, member 8                   | ENST00000358475 |  | -0,653307201 |
| A_23_P26522    | NM_001169      | AQP8         | aquaporin 8                                            | ENST00000219660 |  | -0,653344271 |
| A_21_P0003757  | CR740121       | XLOC_004049  |                                                        |                 |  | -0,65336072  |
| A_21_P0000769  | NR_038332      | LOC100505622 | uncharacterized LOC100505622                           |                 |  | -0,653685394 |
| A_23_P1691     | NM_002421      | MMP1         | matrix metalloproteinase 1 (interstitial collagenase)  | ENST00000315274 |  | -0,65400614  |
| A_23_P1014     | NR_026761      | LINC00467    | long intergenic non-protein coding RNA 467             |                 |  | -0,654009457 |

|               |                 |             |                                                           |                 |              |
|---------------|-----------------|-------------|-----------------------------------------------------------|-----------------|--------------|
| A_21_P0010236 | AK124146        | XLOC_013921 |                                                           |                 | -0,6540278   |
| A_23_P102117  | NM_025216       | WNT10A      | wingless-type MMTV integration site family, member 10A    | ENST00000258411 | -0,654117281 |
| A_23_P206359  | NM_004360       | CDH1        | cadherin 1, type 1, E-cadherin (epithelial)               | ENST00000261769 | -0,6542567   |
| A_33_P3224250 | NM_001048210    | CLCC1       | chloride channel CLIC-like 1                              | ENST00000369971 | -0,65432552  |
| A_23_P13907   | NM_000618       | IGF1        | insulin-like growth factor 1 (somatomedin C)              | ENST00000481539 | -0,654789353 |
| A_33_P3421913 | NM_014333       | CADM1       | cell adhesion molecule 1                                  |                 | -0,654845828 |
| A_23_P401472  | NM_000740       | CHRM3       | cholinergic receptor, muscarinic 3                        | ENST00000255380 | -0,654892534 |
| A_24_P275073  | NM_139155       | ADAMTS14    | ADAM metallopeptidase with thrombospondin type 1 motif    | ENST00000373208 | -0,654895951 |
| A_21_P0007153 | NR_026967       | LOC143666   | uncharacterized LOC143666                                 |                 | -0,655414025 |
| A_32_P100109  | NM_004726       | REPS2       | RALBP1 associated Eps domain containing 2                 | ENST00000357277 | -0,655491394 |
| A_24_P945194  | NM_013374       | PDCD6IP     | programmed cell death 6 interacting protein               | ENST00000307296 | -0,655509073 |
| A_23_P116829  | NM_003348       | UBE2N       | ubiquitin-conjugating enzyme E2N                          | ENST00000318066 | -0,655555208 |
| A_23_P56559   | NM_005771       | DHRS9       | dehydrogenase/reductase (SDR family) member 9             | ENST00000432060 | -0,655707725 |
| A_23_P88678   | NM_152335       | C15orf27    | chromosome 15 open reading frame 27                       | ENST00000484722 | -0,655798407 |
| A_23_P118834  | NM_001067       | TOP2A       | topoisomerase (DNA) II alpha 170kDa                       | ENST00000269577 | -0,655934134 |
| A_33_P3315425 | NM_022840       | METTL4      | methyltransferase like 4                                  | ENST00000319888 | -0,655959086 |
| A_33_P3383836 | NM_015163       | TRIM9       | tripartite motif containing 9                             | ENST00000555170 | -0,656029852 |
| A_33_P3210099 | NM_020778       | ALPK3       | alpha-kinase 3                                            | ENST00000258888 | -0,656215163 |
| A_23_P215634  | NM_001013398    | IGFBP3      | insulin-like growth factor binding protein 3              | ENST00000438491 | -0,656499793 |
| A_23_P34452   | NM_000427       | LOR         | loricrin                                                  | ENST00000392652 | -0,656503585 |
| A_21_P0000004 | NM_001099791    | SYS1        | SYS1 Golgi-localized integral membrane protein homolog (S | ENST00000426004 | -0,656761783 |
| A_23_P120002  | NM_004510       | SP110       | SP110 nuclear body protein                                | ENST00000338556 | -0,657106733 |
| A_23_P66948   | NM_022751       | FAM59A      | family with sequence similarity 59, member A              | ENST00000269209 | -0,657273481 |
| A_21_P0006758 | ENST00000440750 | XLOC_008815 |                                                           | ENST00000440750 | -0,657291347 |
| A_33_P3240328 | NM_002653       | PITX1       | paired-like homeodomain 1                                 | ENST00000265340 | -0,657374009 |
| A_23_P10182   | NM_003500       | ACOX2       | acyl-CoA oxidase 2, branched chain                        | ENST00000460921 | -0,657388442 |
| A_23_P87560   | NM_001731       | BTG1        | B-cell translocation gene 1, anti-proliferative           | ENST00000256015 | -0,657405953 |
| A_23_P10182   | NM_003500       | ACOX2       | acyl-CoA oxidase 2, branched chain                        | ENST00000460921 | -0,657412384 |
| A_23_P10182   | NM_003500       | ACOX2       | acyl-CoA oxidase 2, branched chain                        | ENST00000460921 | -0,657562913 |

|               |                   |                |                                                                |                 |              |
|---------------|-------------------|----------------|----------------------------------------------------------------|-----------------|--------------|
| A_33_P3284939 | NM_199129         | TMEM189        | transmembrane protein 189                                      | ENST00000371652 | -0,6576482   |
| A_32_P160045  | NM_152665         | TCTEX1D1       | Tctex1 domain containing 1                                     | ENST00000282670 | -0,65768143  |
| A_33_P3867534 | NM_182751         | MCM10          | minichromosome maintenance complex component 10                | ENST00000361282 | -0,65772861  |
| A_23_P58506   | NM_012081         | ELL2           | elongation factor, RNA polymerase II, 2                        | ENST00000237853 | -0,657791254 |
| A_24_P330796  | NM_017777         | MKS1           | Meckel syndrome, type 1                                        | ENST00000337050 | -0,657949998 |
| A_32_P79434   | NM_002847         | PTPRN2         | protein tyrosine phosphatase, receptor type, N polypeptide     | ENST00000389418 | -0,65799908  |
| A_21_P0013498 | TCONS_I2_0002789! | XLOC_I2_014289 |                                                                |                 | -0,658218934 |
| A_24_P183664  | NM_014817         | TRIL           | TLR4 interactor with leucine-rich repeats                      | ENST00000322982 | -0,658348087 |
| A_23_P120316  | NM_006636         | MTHFD2         | methylenetetrahydrofolate dehydrogenase (NADP+ depend          | ENST00000394053 | -0,658579417 |
| A_24_P379512  | NM_005482         | PIGK           | phosphatidylinositol glycan anchor biosynthesis, class K       | ENST00000370812 | -0,658588662 |
| A_23_P10518   | NM_016521         | TFDP3          | transcription factor Dp family, member 3                       | ENST00000310125 | -0,658672703 |
| A_33_P3249746 | NM_001190484      | CYP3A5         | cytochrome P450, family 3, subfamily A, polypeptide 5          | ENST00000343703 | -0,658881851 |
| A_21_P0000620 | NR_033997         | LOC386597      | uncharacterized LOC386597                                      |                 | -0,658917138 |
| A_23_P202837  | NM_053056         | CCND1          | cyclin D1                                                      | ENST00000227507 | -0,658967168 |
| A_23_P45087   | NM_016220         | ZNF107         | zinc finger protein 107                                        | ENST00000423627 | -0,658972813 |
| A_23_P68851   | NM_001039570      | KREMEN1        | kringle containing transmembrane protein 1                     | ENST00000400338 | -0,659076014 |
| A_33_P3342056 | NM_173799         | TIGIT          | T cell immunoreceptor with Ig and ITIM domains                 | ENST00000383671 | -0,659080602 |
| A_21_P0010937 | ENST00000446557   | XLOC_I2_001888 |                                                                | ENST00000446557 | -0,659132848 |
| A_24_P122137  | NM_002309         | LIF            | leukemia inhibitory factor (cholinergic differentiation factor | ENST00000249075 | -0,659183958 |
| A_23_P120822  | NM_016327         | UPB1           | ureidopropionase, beta                                         | ENST00000326010 | -0,659289452 |
| A_33_P3222424 | NM_000759         | CSF3           | colony stimulating factor 3 (granulocyte)                      | ENST00000394148 | -0,659355583 |
| A_23_P253791  | NM_004345         | CAMP           | cathelicidin antimicrobial peptide                             | ENST00000296435 | -0,659479557 |
| A_23_P111583  | NM_001001547      | CD36           | CD36 molecule (thrombospondin receptor)                        | ENST00000419819 | -0,659592868 |
| A_23_P10182   | NM_003500         | ACOX2          | acyl-CoA oxidase 2, branched chain                             | ENST00000460921 | -0,659913801 |
| A_23_P121222  | NM_020165         | RAD18          | RAD18 homolog (S. cerevisiae)                                  | ENST00000264926 | -0,660001359 |
| A_33_P3309621 | NR_002804         | SIGLECP3       | sialic acid binding Ig-like lectin, pseudogene 3               | ENST00000341811 | -0,660011758 |
| A_21_P0010728 | NM_001244910      | FCGR1B         | Fc fragment of IgG, high affinity Ib, receptor (CD64)          | ENST00000369178 | -0,660022706 |
| A_23_P202071  | NM_001025077      | CELF2          | CUGBP, Elav-like family member 2                               | ENST00000354440 | -0,660048664 |
| A_21_P0008555 | AK056686          | XLOC_011237    |                                                                |                 | -0,660094071 |

|                |                  |                |                                                                          |                 |              |
|----------------|------------------|----------------|--------------------------------------------------------------------------|-----------------|--------------|
| A_33_P3238415  | NM_001080554     | GSG1           | germ cell associated 1                                                   | ENST00000405543 | -0,660223717 |
| A_33_P3360972  | NM_001077594     | EXOC3L4        | exocyst complex component 3-like 4                                       | ENST00000380069 | -0,660551857 |
| A_23_P38427    | NM_032932        | RAB11FIP4      | RAB11 family interacting protein 4 (class II)                            | ENST00000325874 | -0,660628278 |
| A_21_P0013088  | NM_004595        | SMS            | spermine synthase                                                        | ENST00000457085 | -0,660712893 |
| A_21_P0012241  | TCONS_I2_0001755 | XLOC_I2_009281 |                                                                          |                 | -0,660715862 |
| A_23_P155539   | NM_000306        | POU1F1         | POU class 1 homeobox 1                                                   | ENST00000344265 | -0,661129175 |
| A_23_P337262   | NM_153000        | APCDD1         | adenomatosis polyposis coli down-regulated 1                             | ENST00000423585 | -0,661316033 |
| A_23_P500130   | NM_153186        | KANK1          | KN motif and ankyrin repeat domains 1                                    | ENST00000382289 | -0,661428324 |
| A_23_P8834     | NM_001979        | EPHX2          | epoxide hydrolase 2, cytoplasmic                                         | ENST00000415449 | -0,661514363 |
| A_23_P138507   | NM_001786        | CDK1           | cyclin-dependent kinase 1                                                | ENST00000448257 | -0,661657929 |
| A_23_P403991   | NM_024080        | TRPM8          | transient receptor potential cation channel, subfamily M, member 8       | ENST00000324695 | -0,661878193 |
| A_23_P34307    | NM_005482        | PIGK           | phosphatidylinositol glycan anchor biosynthesis, class K                 | ENST00000370812 | -0,662039774 |
| A_19_P00318904 | XR_108784        | LOC100507525   |                                                                          |                 | -0,662154299 |
| A_21_P0009096  | TCONS_00024822   | XLOC_011681    |                                                                          |                 | -0,662489309 |
| A_23_P202837   | NM_053056        | CCND1          | cyclin D1                                                                | ENST00000227507 | -0,662513747 |
| A_32_P132860   | NR_024280        | UNQ6494        | uncharacterized LOC100129066                                             |                 | -0,662826368 |
| A_33_P3308905  | NM_001083535     | CEP57L1        | centrosomal protein 57kDa-like 1                                         | ENST00000407272 | -0,662914778 |
| A_24_P261734   | NM_030674        | SLC38A1        | solute carrier family 38, member 1                                       |                 | -0,663054172 |
| A_24_P346431   | NM_022748        | TNS3           | tensin 3                                                                 | ENST00000398879 | -0,663208557 |
| A_33_P3411075  | NM_003088        | FSCN1          | fascin homolog 1, actin-bundling protein (Strongylocentrotus purpuratus) | ENST00000340250 | -0,663355626 |
| A_21_P0014662  | XR_110944        | LOC100507395   | uncharacterized LOC100507395                                             |                 | -0,663446934 |
| A_21_P0014060  | ENST00000488806  | PIGC           | phosphatidylinositol glycan anchor biosynthesis, class C                 | ENST00000488806 | -0,663486044 |
| A_21_P0004840  | TCONS_00011699   | XLOC_005180    |                                                                          |                 | -0,663617589 |
| A_23_P304991   | NM_000411        | HLCS           | holocarboxylase synthetase (biotin-(propionyl-CoA-carboxylase)           | ENST00000399120 | -0,66367804  |
| A_23_P415706   | NM_198827        | GPR133         | G protein-coupled receptor 133                                           | ENST00000261654 | -0,663691992 |
| A_33_P3296707  | NM_001078173     | FAM127C        | family with sequence similarity 127, member C                            | ENST00000391440 | -0,663848992 |
| A_21_P0006654  | ENST00000429092  | XLOC_008391    |                                                                          | ENST00000429092 | -0,66392577  |
| A_23_P110624   | NM_001332        | CTNND2         | catenin (cadherin-associated protein), delta 2 (neural plakophilin-3)    | ENST00000538638 | -0,664008067 |
| A_23_P113161   | NM_030806        | C1orf21        | chromosome 1 open reading frame 21                                       | ENST00000235307 | -0,664070264 |

|                |              |                |                                                                     |                 |              |
|----------------|--------------|----------------|---------------------------------------------------------------------|-----------------|--------------|
| A_23_P127186   | NM_206862    | TACC2          | transforming, acidic coiled-coil containing protein 2               | ENST00000368997 | -0,664085223 |
| A_23_P1691     | NM_002421    | MMP1           | matrix metalloproteinase 1 (interstitial collagenase)               | ENST00000315274 | -0,664109882 |
| A_23_P118      | NM_001439    | EXTL2          | exostoses (multiple)-like 2                                         | ENST00000370114 | -0,664409151 |
| A_23_P119562   | NM_001928    | CFD            | complement factor D (adipsin)                                       | ENST00000327726 | -0,664687371 |
| A_21_P0013767  | BC048131     | LOC550643      | uncharacterized LOC550643                                           |                 | -0,664698181 |
| A_24_P152968   | NM_001353    | AKR1C1         | aldo-keto reductase family 1, member C1 (dihydrodiol dehydrogenase) | ENST00000434459 | -0,664858605 |
| A_24_P941268   | NM_007220    | CA5B           | carbonic anhydrase VB, mitochondrial                                | ENST00000318636 | -0,665206002 |
| A_23_P57856    | NM_001130845 | BCL6           | B-cell CLL/lymphoma 6                                               | ENST00000419510 | -0,665221244 |
| A_24_P95439    | NM_001014437 | CARS           | cysteinyl-tRNA synthetase                                           | ENST00000397114 | -0,665321975 |
| A_21_P0014580  | XR_110374    | LOC100507195   | uncharacterized LOC100507195                                        |                 | -0,665688301 |
| A_23_P111583   | NM_001001547 | CD36           | CD36 molecule (thrombospondin receptor)                             | ENST00000419819 | -0,665808004 |
| A_23_P96369    | NM_018015    | CXorf57        | chromosome X open reading frame 57                                  | ENST00000372544 | -0,665862697 |
| A_24_P237443   | NM_018990    | SASH3          | SAM and SH3 domain containing 3                                     | ENST00000356892 | -0,66599     |
| A_21_P0010535  | THC2520127   | XLOC_I2_000297 |                                                                     |                 | -0,666015703 |
| A_23_P1691     | NM_002421    | MMP1           | matrix metalloproteinase 1 (interstitial collagenase)               | ENST00000315274 | -0,666126521 |
| A_23_P119102   | NM_003370    | VASP           | vasodilator-stimulated phosphoprotein                               | ENST00000245932 | -0,666368599 |
| A_19_P00317878 | XR_132670    | LOC100652730   | uncharacterized LOC100652730                                        | ENST00000412500 | -0,666589874 |
| A_23_P126278   | NM_003465    | CHIT1          | chitinase 1 (chitotriosidase)                                       | ENST00000484834 | -0,666686983 |
| A_33_P3735158  | AK093004     | LOC286272      | uncharacterized LOC286272                                           |                 | -0,666750529 |
| A_33_P3479449  | AK055877     | LOC100506328   | uncharacterized LOC100506328                                        |                 | -0,666986114 |
| A_24_P372625   | NM_016422    | RNF141         | ring finger protein 141                                             | ENST00000534281 | -0,667001426 |
| A_23_P10182    | NM_003500    | ACOX2          | acyl-CoA oxidase 2, branched chain                                  | ENST00000460921 | -0,667132385 |
| A_23_P1691     | NM_002421    | MMP1           | matrix metalloproteinase 1 (interstitial collagenase)               | ENST00000315274 | -0,667400624 |
| A_23_P10182    | NM_003500    | ACOX2          | acyl-CoA oxidase 2, branched chain                                  | ENST00000460921 | -0,667573489 |
| A_23_P1691     | NM_002421    | MMP1           | matrix metalloproteinase 1 (interstitial collagenase)               | ENST00000315274 | -0,667683573 |
| A_23_P157404   | NM_001283    | AP1S1          | adaptor-related protein complex 1, sigma 1 subunit                  | ENST00000337619 | -0,66780699  |
| A_23_P502336   | NM_013447    | EMR2           | egf-like module containing, mucin-like, hormone receptor-like 2     | ENST00000315576 | -0,667839419 |
| A_23_P107744   | NM_030760    | S1PR5          | sphingosine-1-phosphate receptor 5                                  | ENST00000359134 | -0,668557657 |
| A_24_P522864   | NR_026880    | MGC12916       | uncharacterized protein MGC12916                                    |                 | -0,66862901  |



|               |                                  |           |                                                              |                 |              |
|---------------|----------------------------------|-----------|--------------------------------------------------------------|-----------------|--------------|
| A_23_P119102  | NM_003370                        | VASP      | vasodilator-stimulated phosphoprotein                        | ENST00000245932 | -0,668717309 |
| A_33_P3492087 | AK097198                         | LOC284191 | uncharacterized LOC284191                                    |                 | -0,668969034 |
| A_33_P3372099 | NM_145244                        | DDIT4L    | DNA-damage-inducible transcript 4-like                       | ENST00000273990 | -0,66899627  |
| A_33_P3264895 | NM_144593                        | RHEBL1    | Ras homolog enriched in brain like 1                         | ENST00000420065 | -0,669089087 |
| A_23_P151294  | NM_000619                        | IFNG      | interferon, gamma                                            | ENST00000229135 | -0,669194068 |
| A_21_P0001952 | NM_001202519                     | CFLAR     | CASP8 and FADD-like apoptosis regulator                      | ENST00000434645 | -0,669399968 |
| A_23_P113161  | NM_030806                        | C1orf21   | chromosome 1 open reading frame 21                           | ENST00000235307 | -0,669423165 |
| A_24_P396375  | NM_001113347                     | ECE1      | endothelin converting enzyme 1                               | ENST00000415912 | -0,669426956 |
| A_32_P352743  | NM_001004440                     | FAM19A3   | family with sequence similarity 19 (chemokine (C-C motif)-li | ENST00000369630 | -0,669486965 |
| A_23_P67042   | NM_017947                        | MOCOS     | molybdenum cofactor sulfurase                                | ENST00000261326 | -0,669559756 |
| A_21_P0010669 | TCONS_I2_0000176: XLOC_I2_001302 |           |                                                              |                 | -0,669647721 |
| A_23_P118834  | NM_001067                        | TOP2A     | topoisomerase (DNA) II alpha 170kDa                          | ENST00000269577 | -0,669763349 |
| A_23_P166248  | NM_004414                        | RCAN1     | regulator of calcineurin 1                                   | ENST00000443408 | -0,669767534 |
| A_23_P104438  | NM_032578                        | MYPN      | myopalladin                                                  | ENST00000354393 | -0,669845166 |
| A_23_P350719  | NR_026864                        | PRSS30P   | protease, serine, 30 homolog (mouse), pseudogene             | ENST00000390681 | -0,669858407 |
| A_33_P3666817 | NM_001001791                     | C10orf55  | chromosome 10 open reading frame 55                          | ENST00000412307 | -0,669882454 |
| A_23_P93431   | NM_016108                        | AIG1      | androgen-induced 1                                           | ENST00000357847 | -0,669973531 |
| A_23_P38346   | NM_024119                        | DHX58     | DEXH (Asp-Glu-X-His) box polypeptide 58                      | ENST00000423748 | -0,669994655 |
| A_23_P369815  | NM_000639                        | FASLG     | Fas ligand (TNF superfamily, member 6)                       | ENST00000367721 | -0,670360267 |
| A_23_P23048   | NM_002965                        | S100A9    | S100 calcium binding protein A9                              | ENST00000368738 | -0,670376131 |
| A_33_P3367201 | NM_052845                        | MMAB      | methylmalonic aciduria (cobalamin deficiency) cblB type      |                 | -0,67038258  |
| A_24_P28657   | NM_015446                        | AHCTF1    | AT hook containing transcription factor 1                    | ENST00000391829 | -0,670447296 |
| A_23_P120467  | NM_199427                        | ZFP64     | zinc finger protein 64 homolog (mouse)                       | ENST00000361387 | -0,670610875 |
| A_23_P90933   | NM_080876                        | DUSP19    | dual specificity phosphatase 19                              | ENST00000342619 | -0,670635148 |
| A_23_P116942  | NM_002286                        | LAG3      | lymphocyte-activation gene 3                                 | ENST00000203629 | -0,670982572 |
| A_23_P140725  | NM_014714                        | IFT140    | intraflagellar transport 140 homolog (Chlamydomonas)         | ENST00000426508 | -0,671031385 |
| A_23_P25155   | NM_020370                        | GPR84     | G protein-coupled receptor 84                                | ENST00000551809 | -0,671051342 |
| A_23_P111583  | NM_001001547                     | CD36      | CD36 molecule (thrombospondin receptor)                      | ENST00000419819 | -0,671426872 |
| A_23_P71530   | NM_002546                        | TNFRSF11B | tumor necrosis factor receptor superfamily, member 11b       | ENST00000521597 | -0,671459412 |

|               |                 |              |                                                             |                 |              |
|---------------|-----------------|--------------|-------------------------------------------------------------|-----------------|--------------|
| A_23_P116829  | NM_003348       | UBE2N        | ubiquitin-conjugating enzyme E2N                            | ENST00000318066 | -0,671557202 |
| A_23_P170857  | NM_002182       | IL1RAP       | interleukin 1 receptor accessory protein                    | ENST00000447382 | -0,671603369 |
| A_23_P259692  | NM_058179       | PSAT1        | phosphoserine aminotransferase 1                            | ENST00000376588 | -0,671639931 |
| A_23_P104318  | NM_019058       | DDIT4        | DNA-damage-inducible transcript 4                           | ENST00000307365 | -0,671643772 |
| A_21_P0004869 | NR_038929       | LOC100131289 | uncharacterized LOC100131289                                |                 | -0,671841463 |
| A_23_P104318  | NM_019058       | DDIT4        | DNA-damage-inducible transcript 4                           | ENST00000307365 | -0,672160397 |
| A_23_P120316  | NM_006636       | MTHFD2       | methylenetetrahydrofolate dehydrogenase (NADP+ depend       | ENST00000394053 | -0,672179524 |
| A_23_P105002  | NM_000327       | ROM1         | retinal outer segment membrane protein 1                    | ENST00000278833 | -0,672196869 |
| A_23_P1691    | NM_002421       | MMP1         | matrix metalloproteinase 1 (interstitial collagenase)       | ENST00000315274 | -0,672311061 |
| A_21_P0007246 | TCONS_00019407  | XLOC_009230  |                                                             |                 | -0,672335833 |
| A_23_P120467  | NM_199427       | ZFP64        | zinc finger protein 64 homolog (mouse)                      | ENST00000361387 | -0,672429671 |
| A_23_P18598   | NM_018323       | PI4K2B       | phosphatidylinositol 4-kinase type 2 beta                   | ENST00000537420 | -0,67243489  |
| A_33_P3223467 | NM_025054       | VCPIP1       | valosin containing protein (p97)/p47 complex interacting pr | ENST00000310421 | -0,672571867 |
| A_21_P0002075 | ENST00000448595 | XLOC_002221  |                                                             | ENST00000448595 | -0,67269342  |
| A_23_P26325   | NM_002987       | CCL17        | chemokine (C-C motif) ligand 17                             | ENST00000219244 | -0,672694489 |
| A_21_P0002658 | NR_037631       | LOC100288911 | uncharacterized LOC100288911                                |                 | -0,672789558 |
| A_23_P352266  | NM_000633       | BCL2         | B-cell CLL/lymphoma 2                                       | ENST00000398117 | -0,672841667 |
| A_23_P352266  | NM_000633       | BCL2         | B-cell CLL/lymphoma 2                                       | ENST00000398117 | -0,673098708 |
| A_23_P108823  | NM_032523       | OSBPL6       | oxysterol binding protein-like 6                            | ENST00000315022 | -0,673126324 |
| A_23_P109171  | NM_001195       | BFSP1        | beaded filament structural protein 1, filensin              | ENST00000536626 | -0,673180399 |
| A_23_P166848  | NM_002343       | LTF          | lactotransferrin                                            | ENST00000426532 | -0,673219234 |
| A_23_P211167  | NM_004928       | C21orf2      | chromosome 21 open reading frame 2                          | ENST00000339818 | -0,673271884 |
| A_33_P3331641 | NR_024421       | ZNF503-AS2   | ZNF503 antisense RNA 2 (non-protein coding)                 | ENST00000425916 | -0,673420604 |
| A_23_P152002  | NM_004049       | BCL2A1       | BCL2-related protein A1                                     | ENST00000267953 | -0,673467365 |
| A_24_P377499  | NM_015550       | OSBPL3       | oxysterol binding protein-like 3                            | ENST00000352860 | -0,673570268 |
| A_23_P120316  | NM_006636       | MTHFD2       | methylenetetrahydrofolate dehydrogenase (NADP+ depend       | ENST00000394053 | -0,673673955 |
| A_33_P3354935 | NM_172212       | CSF1         | colony stimulating factor 1 (macrophage)                    | ENST00000369802 | -0,67369761  |
| A_23_P396666  | NM_015079       | TBC1D2B      | TBC1 domain family, member 2B                               | ENST00000300584 | -0,67377221  |
| A_21_P0008358 | ENST00000554225 | XLOC_010879  |                                                             | ENST00000554225 | -0,673811255 |

|                |              |             |                                                                |                 |              |
|----------------|--------------|-------------|----------------------------------------------------------------|-----------------|--------------|
| A_23_P120316   | NM_006636    | MTHFD2      | methylenetetrahydrofolate dehydrogenase (NADP+ depend          | ENST00000394053 | -0,67398709  |
| A_23_P369815   | NM_000639    | FASLG       | Fas ligand (TNF superfamily, member 6)                         | ENST00000367721 | -0,674207295 |
| A_19_P00315528 | AF088007     | XLOC_008370 |                                                                |                 | -0,674346383 |
| A_23_P118834   | NM_001067    | TOP2A       | topoisomerase (DNA) II alpha 170kDa                            | ENST00000269577 | -0,674434087 |
| A_21_P0012961  | XR_110313    | LOC255187   | hCG1980447                                                     |                 | -0,674597511 |
| A_23_P148446   | NM_003336    | UBE2A       | ubiquitin-conjugating enzyme E2A                               | ENST00000371569 | -0,674610774 |
| A_33_P3246283  | AK128439     | VAC14       | Vac14 homolog ( <i>S. cerevisiae</i> )                         |                 | -0,674713197 |
| A_23_P102117   | NM_025216    | WNT10A      | wingless-type MMTV integration site family, member 10A         | ENST00000258411 | -0,67476529  |
| A_23_P155688   | NM_021114    | SPINK2      | serine peptidase inhibitor, Kazal type 2 (acrosin-trypsin inhi | ENST00000248701 | -0,674829766 |
| A_33_P3311439  | NM_001024071 | GCH1        | GTP cyclohydrolase 1                                           | ENST00000395524 | -0,675062287 |
| A_33_P3379091  | NM_145731    | SYNGR1      | synaptogyrin 1                                                 |                 | -0,675115329 |
| A_23_P104318   | NM_019058    | DDIT4       | DNA-damage-inducible transcript 4                              | ENST00000307365 | -0,675147018 |
| A_23_P106016   | NM_002742    | PRKD1       | protein kinase D1                                              | ENST00000331968 | -0,675389492 |
| A_33_P3218980  | NM_001776    | ENTPD1      | ectonucleoside triphosphate diphosphohydrolase 1               | ENST00000371203 | -0,675738853 |
| A_23_P119102   | NM_003370    | VASP        | vasodilator-stimulated phosphoprotein                          | ENST00000245932 | -0,675856727 |
| A_23_P10506    | NM_014485    | HPGDS       | hematopoietic prostaglandin D synthase                         | ENST00000295256 | -0,675910484 |
| A_23_P362191   | NR_026951    | LINC00324   | long intergenic non-protein coding RNA 324                     | ENST00000315707 | -0,676086913 |
| A_23_P107612   | NM_004163    | RAB27B      | RAB27B, member RAS oncogene family                             | ENST00000262094 | -0,676249792 |
| A_23_P35456    | NM_014631    | SH3PXD2A    | SH3 and PX domains 2A                                          | ENST00000355946 | -0,676516011 |
| A_23_P119102   | NM_003370    | VASP        | vasodilator-stimulated phosphoprotein                          | ENST00000245932 | -0,676617137 |
| A_23_P415401   | NM_001206    | KLF9        | Kruppel-like factor 9                                          | ENST00000377126 | -0,676723389 |
| A_23_P121480   | NM_001004196 | CD200       | CD200 molecule                                                 | ENST00000478595 | -0,676777121 |
| A_23_P120316   | NM_006636    | MTHFD2      | methylenetetrahydrofolate dehydrogenase (NADP+ depend          | ENST00000394053 | -0,676793772 |
| A_33_P3353791  | NM_181501    | ITGA1       | integrin, alpha 1                                              | ENST00000506275 | -0,676985705 |
| A_33_P3216714  | NM_014787    | DNAJC6      | DnaJ (Hsp40) homolog, subfamily C, member 6                    | ENST00000371069 | -0,677014242 |
| A_23_P111995   | NM_002318    | LOXL2       | lysyl oxidase-like 2                                           | ENST00000389131 | -0,677310581 |
| A_23_P104318   | NM_019058    | DDIT4       | DNA-damage-inducible transcript 4                              | ENST00000307365 | -0,677344801 |
| A_23_P387184   | NM_020464    | NHSL1       | NHS-like 1                                                     | ENST00000343505 | -0,677544525 |
| A_23_P119778   | NM_020342    | SLC39A10    | solute carrier family 39 (zinc transporter), member 10         | ENST00000409086 | -0,677619145 |

|               |                  |                |                                                                          |                 |              |
|---------------|------------------|----------------|--------------------------------------------------------------------------|-----------------|--------------|
| A_23_P120316  | NM_006636        | MTHFD2         | methylenetetrahydrofolate dehydrogenase (NADP+ dependant)                | ENST00000394053 | -0,677687998 |
| A_33_P3410654 | NM_205852        | CLEC12B        | C-type lectin domain family 12, member B                                 | ENST00000396502 | -0,678011062 |
| A_32_P40463   | NR_002779        | NUDT9P1        | nudix (nucleoside diphosphate linked moiety X)-type motif 9 pseudogene 1 |                 | -0,678047994 |
| A_23_P112554  | NM_001855        | COL15A1        | collagen, type XV, alpha 1                                               | ENST00000375001 | -0,678096125 |
| A_23_P121222  | NM_020165        | RAD18          | RAD18 homolog (S. cerevisiae)                                            | ENST00000264926 | -0,678291388 |
| A_21_P0001621 | THC2776551       | XLOC_001197    |                                                                          |                 | -0,67831322  |
| A_21_P0012909 | TCONS_I2_0002293 | XLOC_I2_012071 |                                                                          |                 | -0,678509164 |
| A_23_P120467  | NM_199427        | ZFP64          | zinc finger protein 64 homolog (mouse)                                   | ENST00000361387 | -0,678600759 |
| A_23_P120316  | NM_006636        | MTHFD2         | methylenetetrahydrofolate dehydrogenase (NADP+ dependant)                | ENST00000394053 | -0,67875043  |
| A_23_P105862  | NM_023037        | FRY            | furry homolog (Drosophila)                                               | ENST00000380257 | -0,678759593 |
| A_23_P103310  | NM_002963        | S100A7         | S100 calcium binding protein A7                                          | ENST00000368723 | -0,678836424 |
| A_23_P121480  | NM_001004196     | CD200          | CD200 molecule                                                           | ENST00000478595 | -0,678920934 |
| A_23_P111583  | NM_001001547     | CD36           | CD36 molecule (thrombospondin receptor)                                  | ENST00000419819 | -0,679014382 |
| A_23_P202860  | NM_024514        | CYP2R1         | cytochrome P450, family 2, subfamily R, polypeptide 1                    | ENST00000334636 | -0,679022521 |
| A_23_P111583  | NM_001001547     | CD36           | CD36 molecule (thrombospondin receptor)                                  | ENST00000419819 | -0,679251654 |
| A_21_P0012521 | NR_033752        | LOC344887      | NmrA-like family domain containing 1 pseudogene                          | ENST00000416764 | -0,679529965 |
| A_23_P104318  | NM_019058        | DDIT4          | DNA-damage-inducible transcript 4                                        | ENST00000307365 | -0,679714326 |
| A_21_P0004108 | ENST00000512978  | XLOC_004747    |                                                                          | ENST00000512978 | -0,679776217 |
| A_23_P61127   | NM_024122        | APOO           | apolipoprotein O                                                         | ENST00000490078 | -0,679802521 |
| A_23_P106602  | NM_031476        | CRISPLD2       | cysteine-rich secretory protein LCCL domain containing 2                 | ENST00000262424 | -0,679961003 |
| A_23_P71774   | NM_002176        | IFNB1          | interferon, beta 1, fibroblast                                           | ENST00000380232 | -0,680333056 |
| A_23_P104318  | NM_019058        | DDIT4          | DNA-damage-inducible transcript 4                                        | ENST00000307365 | -0,680422485 |
| A_23_P306941  | NM_153615        | RGL4           | ral guanine nucleotide dissociation stimulator-like 4                    | ENST00000382833 | -0,680567    |
| A_32_P62863   | NM_014575        | SCHIP1         | schwannomin interacting protein 1                                        | ENST00000412423 | -0,680650613 |
| A_21_P0010499 | TCONS_00040338   | HOTTIP         |                                                                          |                 | -0,68073645  |
| A_23_P371039  | NM_002531        | NTSR1          | neurotensin receptor 1 (high affinity)                                   | ENST00000370501 | -0,680777085 |
| A_23_P398566  | NM_173200        | NR4A3          | nuclear receptor subfamily 4, group A, member 3                          | ENST00000330847 | -0,680878855 |
| A_23_P1691    | NM_002421        | MMP1           | matrix metalloproteinase 1 (interstitial collagenase)                    | ENST00000315274 | -0,680945534 |
| A_23_P207058  | NM_003955        | SOCS3          | suppressor of cytokine signaling 3                                       | ENST00000330871 | -0,681615704 |

|               |                 |              |                                                            |  |                 |              |
|---------------|-----------------|--------------|------------------------------------------------------------|--|-----------------|--------------|
| A_21_P0001776 | BC036617        | XLOC_001558  |                                                            |  |                 | -0,681694327 |
| A_23_P109034  | NM_002999       | SDC4         | syndecan 4                                                 |  | ENST00000372733 | -0,681784483 |
| A_21_P0003118 | TCONS_00006511  | XLOC_003125  |                                                            |  |                 | -0,681902457 |
| A_23_P111583  | NM_001001547    | CD36         | CD36 molecule (thrombospondin receptor)                    |  | ENST00000419819 | -0,681914952 |
| A_21_P0013981 | ENST00000481779 | CHRM3        | cholinergic receptor, muscarinic 3                         |  | ENST00000481779 | -0,681999831 |
| A_23_P209129  | NM_002288       | LAIR2        | leukocyte-associated immunoglobulin-like receptor 2        |  | ENST00000301202 | -0,682132433 |
| A_23_P202837  | NM_053056       | CCND1        | cyclin D1                                                  |  | ENST00000227507 | -0,68217287  |
| A_23_P85716   | NM_021642       | FCGR2A       | Fc fragment of IgG, low affinity IIa, receptor (CD32)      |  | ENST00000471026 | -0,682494524 |
| A_24_P245815  | NM_020437       | ASPHD2       | aspartate beta-hydroxylase domain containing 2             |  | ENST00000215906 | -0,682702408 |
| A_33_P3407256 | NM_001166260    | TRIP13       | thyroid hormone receptor interactor 13                     |  | ENST00000512024 | -0,682848513 |
| A_23_P121564  | NM_000857       | GUCY1B3      | guanylate cyclase 1, soluble, beta 3                       |  | ENST00000264424 | -0,682876781 |
| A_32_P70135   | NM_025138       | PROSER1      | proline and serine rich 1                                  |  | ENST00000350125 | -0,682885246 |
| A_23_P111701  | NM_004126       | GNG11        | guanine nucleotide binding protein (G protein), gamma 11   |  | ENST00000248564 | -0,682963708 |
| A_23_P3532    | NM_004862       | LITAF        | lipopolysaccharide-induced TNF factor                      |  | ENST00000381810 | -0,683035814 |
| A_23_P302568  | NM_003459       | SLC30A3      | solute carrier family 30 (zinc transporter), member 3      |  | ENST00000233535 | -0,683077379 |
| A_21_P0009158 | ENST00000458492 | XLOC_012115  |                                                            |  | ENST00000458492 | -0,683080255 |
| A_21_P0014404 | ENST00000422459 | LOC100506115 |                                                            |  | ENST00000422459 | -0,683240897 |
| A_23_P416774  | NM_016929       | CLIC5        | chloride intracellular channel 5                           |  | ENST00000185206 | -0,683517229 |
| A_23_P161152  | NM_014317       | PDSS1        | prenyl (decaprenyl) diphosphate synthase, subunit 1        |  | ENST00000470978 | -0,683535405 |
| A_21_P0009165 | ENST00000444464 | XLOC_012170  |                                                            |  | ENST00000444464 | -0,683786294 |
| A_23_P202837  | NM_053056       | CCND1        | cyclin D1                                                  |  | ENST00000227507 | -0,684265526 |
| A_23_P104318  | NM_019058       | DDIT4        | DNA-damage-inducible transcript 4                          |  | ENST00000307365 | -0,684275129 |
| A_23_P202881  | NM_005103       | FEZ1         | fasciculation and elongation protein zeta 1 (zygin I)      |  | ENST00000528863 | -0,684316805 |
| A_24_P38754   | NM_018464       | CISD1        | CDGSH iron sulfur domain 1                                 |  | ENST00000333926 | -0,68437905  |
| A_23_P99452   | NM_000059       | BRCA2        | breast cancer 2, early onset                               |  | ENST00000380152 | -0,684715787 |
| A_23_P7827    | NM_001010919    | FAM26F       | family with sequence similarity 26, member F               |  | ENST00000368605 | -0,685020417 |
| A_23_P97860   | NM_000235       | LIPA         | lipase A, lysosomal acid, cholesterol esterase             |  | ENST00000425287 | -0,685233564 |
| A_24_P245838  | NM_002409       | MGAT3        | mannosyl (beta-1,4-)-glycoprotein beta-1,4-N-acetylglucosa |  | ENST00000341184 | -0,68538101  |
| A_33_P3333317 | NM_001008211    | OPTN         | optineurin                                                 |  | ENST00000263036 | -0,68548744  |



|               |                 |                |                                                                 |                 |              |
|---------------|-----------------|----------------|-----------------------------------------------------------------|-----------------|--------------|
| A_23_P256956  | NM_005733       | KIF20A         | kinesin family member 20A                                       | ENST00000502338 | -0,685713583 |
| A_33_P3305758 | NM_001747       | CAPG           | capping protein (actin filament), gelsolin-like                 | ENST00000415012 | -0,685950605 |
| A_24_P252996  | NM_000804       | FOLR3          | folate receptor 3 (gamma)                                       | ENST00000542161 | -0,686264864 |
| A_24_P393740  | NM_001465       | FYB            | FYN binding protein                                             | ENST00000351578 | -0,68631892  |
| A_24_P921321  | NM_002843       | PTPRJ          | protein tyrosine phosphatase, receptor type, J                  | ENST00000278456 | -0,68642885  |
| A_23_P121064  | NM_002852       | PTX3           | pentraxin 3, long                                               | ENST00000295927 | -0,686518588 |
| A_23_P216766  | NM_030940       | ISCA1          | iron-sulfur cluster assembly 1 homolog ( <i>S. cerevisiae</i> ) | ENST00000375991 | -0,686533437 |
| A_33_P3417626 | NM_198573       | ENHO           | energy homeostasis associated                                   | ENST00000303992 | -0,686603069 |
| A_21_P0010558 | NM_001198834    | PDE4DIP        | phosphodiesterase 4D interacting protein                        | ENST00000369356 | -0,686859963 |
| A_24_P398323  | NM_001003827    | TRIM34         | tripartite motif containing 34                                  | ENST00000495668 | -0,687089132 |
| A_23_P202837  | NM_053056       | CCND1          | cyclin D1                                                       | ENST00000227507 | -0,68713459  |
| A_23_P104318  | NM_019058       | DDIT4          | DNA-damage-inducible transcript 4                               | ENST00000307365 | -0,687305079 |
| A_33_P3325349 | NM_005723       | TSPAN5         | tetraspanin 5                                                   | ENST00000305798 | -0,687852741 |
| A_23_P111583  | NM_001001547    | CD36           | CD36 molecule (thrombospondin receptor)                         | ENST00000419819 | -0,688006815 |
| A_24_P788878  | NM_001007595    | C2CD4B         | C2 calcium-dependent domain containing 4B                       | ENST00000380392 | -0,68877015  |
| A_23_P134454  | NM_001753       | CAV1           | caveolin 1, caveolae protein, 22kDa                             | ENST00000341049 | -0,68890709  |
| A_23_P502312  | NM_078481       | CD97           | CD97 molecule                                                   | ENST00000242786 | -0,688912379 |
| A_33_P3210343 | NM_001987       | ETV6           | ets variant 6                                                   |                 | -0,688948084 |
| A_33_P3286146 | NR_033652       | LOC100132891   | uncharacterized LOC100132891                                    | ENST00000457356 | -0,689027699 |
| A_23_P104438  | NM_032578       | MYPN           | myopalladin                                                     | ENST00000354393 | -0,689553905 |
| A_32_P74955   | NM_152641       | ARID2          | AT rich interactive domain 2 (ARID, RFX-like)                   | ENST00000338636 | -0,689556647 |
| A_23_P119102  | NM_003370       | VASP           | vasodilator-stimulated phosphoprotein                           | ENST00000245932 | -0,689690325 |
| A_23_P118815  | NM_001012271    | BIRC5          | baculoviral IAP repeat containing 5                             | ENST00000301633 | -0,689917333 |
| A_23_P31721   | NM_001951       | E2F5           | E2F transcription factor 5, p130-binding                        | ENST00000517476 | -0,689961669 |
| A_21_P0003482 | ENST00000510169 | XLOC_004002    |                                                                 | ENST00000510169 | -0,689966882 |
| A_23_P256956  | NM_005733       | KIF20A         | kinesin family member 20A                                       | ENST00000502338 | -0,690326344 |
| A_21_P0012477 | THC2685486      | XLOC_I2_010493 |                                                                 |                 | -0,690660416 |
| A_21_P0000742 | NR_038266       | MYLK-AS1       | MYLK antisense RNA 1 (non-protein coding)                       |                 | -0,690739475 |
| A_23_P118815  | NM_001012271    | BIRC5          | baculoviral IAP repeat containing 5                             | ENST00000301633 | -0,690808514 |

|               |                 |              |                                                       |                 |              |
|---------------|-----------------|--------------|-------------------------------------------------------|-----------------|--------------|
| A_23_P44724   | NM_001321       | CSRP2        | cysteine and glycine-rich protein 2                   | ENST00000548783 | -0,690858833 |
| A_23_P415791  | NM_020721       | KIAA1210     | KIAA1210                                              | ENST00000402510 | -0,690981408 |
| A_23_P138507  | NM_001786       | CDK1         | cyclin-dependent kinase 1                             | ENST00000448257 | -0,691002235 |
| A_23_P7361    | NM_024090       | ELOVL6       | ELOVL fatty acid elongase 6                           | ENST00000394607 | -0,691065768 |
| A_24_P148811  | NM_003707       | RUVBL1       | RuvB-like 1 (E. coli)                                 | ENST00000417360 | -0,69110646  |
| A_23_P99452   | NM_000059       | BRCA2        | breast cancer 2, early onset                          | ENST00000380152 | -0,691253102 |
| A_24_P82493   | NM_024819       | DCAKD        | dephospho-CoA kinase domain containing                | ENST00000342350 | -0,691616863 |
| A_23_P111583  | NM_001001547    | CD36         | CD36 molecule (thrombospondin receptor)               | ENST00000419819 | -0,691638473 |
| A_24_P12626   | NM_001753       | CAV1         | caveolin 1, caveolae protein, 22kDa                   | ENST00000451122 | -0,691761503 |
| A_23_P1691    | NM_002421       | MMP1         | matrix metalloproteinase 1 (interstitial collagenase) | ENST00000315274 | -0,692032809 |
| A_23_P202837  | NM_053056       | CCND1        | cyclin D1                                             | ENST00000227507 | -0,692151363 |
| A_23_P105862  | NM_023037       | FRY          | furry homolog (Drosophila)                            | ENST00000380257 | -0,692156772 |
| A_23_P166408  | NM_020530       | OSM          | oncostatin M                                          | ENST00000215781 | -0,692283738 |
| A_23_P67042   | NM_017947       | MOCOS        | molybdenum cofactor sulfurase                         | ENST00000261326 | -0,69240087  |
| A_23_P10182   | NM_003500       | ACOX2        | acyl-CoA oxidase 2, branched chain                    | ENST00000460921 | -0,692599221 |
| A_24_P388528  | NM_173216       | ST6GAL1      | ST6 beta-galactosamide alpha-2,6-sialyltransferase 1  | ENST00000470633 | -0,692820755 |
| A_32_P172848  | NM_000167       | GK           | glycerol kinase                                       | ENST00000471362 | -0,692865161 |
| A_23_P18579   | NM_006607       | PTTG2        | pituitary tumor-transforming 2                        | ENST00000504686 | -0,692967361 |
| A_23_P108546  | NR_002714       | REG1P        | regenerating islet-derived 1 pseudogene               | ENST00000444841 | -0,693041516 |
| A_33_P3413098 | NR_024618       | LOC100129550 | uncharacterized LOC100129550                          |                 | -0,693101323 |
| A_23_P358394  | NM_015864       | FAM65B       | family with sequence similarity 65, member B          | ENST00000378023 | -0,693203029 |
| A_33_P3309561 | NM_001098503    | PTPRJ        | protein tyrosine phosphatase, receptor type, J        | ENST00000440289 | -0,693223013 |
| A_23_P103511  | NM_001085375    | C1orf226     | chromosome 1 open reading frame 226                   | ENST00000458626 | -0,693488671 |
| A_21_P0005817 | ENST00000523946 | XLOC_007052  |                                                       | ENST00000523946 | -0,693739331 |
| A_23_P399078  | NM_000362       | TIMP3        | TIMP metalloproteinase inhibitor 3                    | ENST00000266085 | -0,693896615 |
| A_23_P60016   | NR_002734       | PTTG3P       | pituitary tumor-transforming 3, pseudogene            |                 | -0,693916381 |
| A_32_P199901  | NM_138382       | RIPPLY1      | rippy1 homolog (zebrafish)                            | ENST00000276173 | -0,69398539  |
| A_33_P3222917 | NM_001024736    | CD276        | CD276 molecule                                        | ENST00000318443 | -0,694071868 |
| A_23_P11201   | NM_001097579    | GPR34        | G protein-coupled receptor 34                         | ENST00000535368 | -0,694175459 |

|               |                  |                |                                                           |                 |  |              |
|---------------|------------------|----------------|-----------------------------------------------------------|-----------------|--|--------------|
| A_21_P0001646 | TCONS_00001887   | XLOC_001266    |                                                           |                 |  | -0,694189    |
| A_23_P118254  | NM_001451        | FOXF1          | forkhead box F1                                           | ENST00000262426 |  | -0,694220128 |
| A_23_P1014    | NR_026761        | LINC00467      | long intergenic non-protein coding RNA 467                |                 |  | -0,694256282 |
| A_23_P202837  | NM_053056        | CCND1          | cyclin D1                                                 | ENST00000227507 |  | -0,694294232 |
| A_23_P113471  | NM_174912        | FAAH2          | fatty acid amide hydrolase 2                              | ENST00000491179 |  | -0,69434212  |
| A_23_P149529  | NM_002353        | TACSTD2        | tumor-associated calcium signal transducer 2              | ENST00000371225 |  | -0,694403346 |
| A_23_P119102  | NM_003370        | VASP           | vasodilator-stimulated phosphoprotein                     | ENST00000245932 |  | -0,695043485 |
| A_23_P111583  | NM_001001547     | CD36           | CD36 molecule (thrombospondin receptor)                   | ENST00000419819 |  | -0,695105846 |
| A_23_P217737  | NM_000052        | ATP7A          | ATPase, Cu <sup>++</sup> transporting, alpha polypeptide  | ENST00000341514 |  | -0,695354336 |
| A_24_P12397   | NM_018965        | TREM2          | triggering receptor expressed on myeloid cells 2          | ENST00000373122 |  | -0,69577447  |
| A_32_P119248  | NM_207305        | FOXD4          | forkhead box D4                                           | ENST00000382500 |  | -0,69615112  |
| A_23_P347632  | NM_014751        | MTSS1          | metastasis suppressor 1                                   | ENST00000520771 |  | -0,696296394 |
| A_24_P38347   | NM_001386        | DPYSL2         | dihydropyrimidinase-like 2                                | ENST00000545637 |  | -0,696422737 |
| A_23_P258493  | NM_005573        | LMNB1          | lamin B1                                                  | ENST00000460265 |  | -0,696423333 |
| A_23_P120316  | NM_006636        | MTHFD2         | methylenetetrahydrofolate dehydrogenase (NADP+ dependant) | ENST00000394053 |  | -0,696596544 |
| A_23_P118     | NM_001439        | EXTL2          | exostoses (multiple)-like 2                               | ENST00000370114 |  | -0,696601939 |
| A_23_P121064  | NM_002852        | PTX3           | pentraxin 3, long                                         | ENST00000295927 |  | -0,696850269 |
| A_23_P106389  | NM_003612        | SEMA7A         | semaphorin 7A, GPI membrane anchor (John Milton Hagen)    | ENST00000543145 |  | -0,696854166 |
| A_21_P0013038 | TCONS_I2_0002443 | XLOC_I2_012727 |                                                           |                 |  | -0,697198554 |
| A_23_P104318  | NM_019058        | DDIT4          | DNA-damage-inducible transcript 4                         | ENST00000307365 |  | -0,697994728 |
| A_24_P324314  | NM_001008529     | MXRA7          | matrix-remodelling associated 7                           | ENST00000375036 |  | -0,698140822 |
| A_23_P110941  | NM_001512        | GSTA4          | glutathione S-transferase alpha 4                         | ENST00000370960 |  | -0,698450499 |
| A_33_P3395081 | NM_017888        | ACSM5          | acyl-CoA synthetase medium-chain family member 5          | ENST00000331849 |  | -0,698457055 |
| A_24_P270460  | NM_005532        | IFI27          | interferon, alpha-inducible protein 27                    | ENST00000555121 |  | -0,698480034 |
| A_23_P106844  | NM_005953        | MT2A           | metallothionein 2A                                        | ENST00000245185 |  | -0,698529607 |
| A_23_P216225  | NM_004430        | EGR3           | early growth response 3                                   | ENST00000317216 |  | -0,699055889 |
| A_21_P0007565 | ENST00000548617  | XLOC_009769    |                                                           | ENST00000548617 |  | -0,699157471 |
| A_24_P120115  | NM_003879        | CFLAR          | CASP8 and FADD-like apoptosis regulator                   | ENST00000340870 |  | -0,699207239 |
| A_23_P103486  | NM_000775        | CYP2J2         | cytochrome P450, family 2, subfamily J, polypeptide 2     | ENST00000469406 |  | -0,699321727 |

|                |                  |                |                                                                 |                 |              |
|----------------|------------------|----------------|-----------------------------------------------------------------|-----------------|--------------|
| A_19_P00316333 | NR_038956        | LOC100506714   | uncharacterized LOC100506714                                    |                 | -0,699479764 |
| A_23_P119102   | NM_003370        | VASP           | vasodilator-stimulated phosphoprotein                           | ENST00000245932 | -0,699598973 |
| A_21_P0012192  | TCONS_I2_0001717 | XLOC_I2_009172 |                                                                 |                 | -0,700128531 |
| A_24_P58337    | NM_002032        | FTH1           | ferritin, heavy polypeptide 1                                   | ENST00000534719 | -0,70017229  |
| A_33_P3361891  | NM_001042575     | TMPRSS7        | transmembrane protease, serine 7                                | ENST00000419127 | -0,700173805 |
| A_23_P139864   | NM_031289        | GSG1           | germ cell associated 1                                          | ENST00000351606 | -0,700192224 |
| A_23_P104318   | NM_019058        | DDIT4          | DNA-damage-inducible transcript 4                               | ENST00000307365 | -0,700413272 |
| A_23_P119102   | NM_003370        | VASP           | vasodilator-stimulated phosphoprotein                           | ENST00000245932 | -0,700467931 |
| A_23_P202837   | NM_053056        | CCND1          | cyclin D1                                                       | ENST00000227507 | -0,70091153  |
| A_33_P3397399  | ENST00000394822  | PPP3CB         | protein phosphatase 3, catalytic subunit, beta isozyme          | ENST00000394822 | -0,701260843 |
| A_23_P254507   | NM_139211        | HOPX           | HOP homeobox                                                    | ENST00000555760 | -0,701361769 |
| A_32_P61684    | NM_018440        | PAG1           | phosphoprotein associated with glycosphingolipid microdomains 1 |                 | -0,701372021 |
| A_33_P3275510  | NM_152504        | C20orf196      | chromosome 20 open reading frame 196                            | ENST00000303142 | -0,701413846 |
| A_24_P356916   | NM_001011554     | SLC13A3        | solute carrier family 13 (sodium-dependent dicarboxylate tr     | ENST00000279027 | -0,701469902 |
| A_23_P7853     | NM_007058        | CAPN11         | calpain 11                                                      | ENST00000533604 | -0,701496504 |
| A_24_P64344    | NM_013314        | BLNK           | B-cell linker                                                   | ENST00000393898 | -0,701962167 |
| A_33_P3270311  | NM_020760        | HECW2          | HECT, C2 and WW domain containing E3 ubiquitin protein li       | ENST00000260983 | -0,70200905  |
| A_23_P126593   | NM_005620        | S100A11        | S100 calcium binding protein A11                                | ENST00000271638 | -0,702768074 |
| A_23_P369815   | NM_000639        | FASLG          | Fas ligand (TNF superfamily, member 6)                          | ENST00000367721 | -0,702777112 |
| A_23_P73114    | NM_000313        | PROS1          | protein S (alpha)                                               | ENST00000394236 | -0,70319472  |
| A_33_P3411427  | NM_001129730     | ZNF837         | zinc finger protein 837                                         | ENST00000427624 | -0,703234531 |
| A_23_P11201    | NM_001097579     | GPR34          | G protein-coupled receptor 34                                   | ENST00000535368 | -0,703272475 |
| A_32_P210202   | NM_203394        | E2F7           | E2F transcription factor 7                                      | ENST00000416496 | -0,703295348 |
| A_21_P0014829  | XR_132680        | LOC100652760   | uncharacterized LOC100652760                                    |                 | -0,703314372 |
| A_33_P3356361  | NR_040059        | LOC100131089   | uncharacterized LOC100131089                                    |                 | -0,703348972 |
| A_23_P21560    | NM_030797        | FAM49A         | family with sequence similarity 49, member A                    | ENST00000406434 | -0,703403079 |
| A_23_P303455   | NM_153832        | GPR161         | G protein-coupled receptor 161                                  | ENST00000367835 | -0,703476849 |
| A_24_P238499   | NM_001012716     | C18orf56       | chromosome 18 open reading frame 56                             | ENST00000323813 | -0,703575734 |
| A_33_P3403942  | NM_080721        | C20orf123      | chromosome 20 open reading frame 123                            | ENST00000279028 | -0,70392607  |

|               |              |           |                                                                 |                 |              |
|---------------|--------------|-----------|-----------------------------------------------------------------|-----------------|--------------|
| A_23_P121064  | NM_002852    | PTX3      | pentraxin 3, long                                               | ENST00000295927 | -0,70419064  |
| A_23_P56734   | NM_006895    | HNMT      | histamine N-methyltransferase                                   | ENST00000485653 | -0,704244444 |
| A_33_P3379396 | NM_006121    | KRT1      | keratin 1                                                       | ENST00000252244 | -0,704326797 |
| A_33_P3344477 | NM_001134999 | FERMT2    | fermitin family member 2                                        | ENST00000343279 | -0,70442363  |
| A_23_P121064  | NM_002852    | PTX3      | pentraxin 3, long                                               | ENST00000295927 | -0,704659196 |
| A_33_P3461258 | AY746436     | DEFA11P   | defensin, alpha 11 pseudogene                                   |                 | -0,704813319 |
| A_23_P45304   | NM_021083    | XK        | X-linked Kx blood group (McLeod syndrome)                       | ENST00000378616 | -0,70524723  |
| A_33_P3225522 | NM_001032731 | OAS2      | 2'-5'-oligoadenylate synthetase 2, 69/71kDa                     | ENST00000449768 | -0,705384783 |
| A_33_P3230254 | NM_022346    | NCAPG     | non-SMC condensin I complex, subunit G                          | ENST00000251496 | -0,705867286 |
| A_33_P3354451 | NM_007028    | TRIM31    | tripartite motif containing 31                                  | ENST00000540829 | -0,705875669 |
| A_23_P369815  | NM_000639    | FASLG     | Fas ligand (TNF superfamily, member 6)                          | ENST00000367721 | -0,705923822 |
| A_23_P67042   | NM_017947    | MOCOS     | molybdenum cofactor sulfurase                                   | ENST00000261326 | -0,705975899 |
| A_23_P102017  | NM_020711    | ERMN      | ermin, ERM-like protein                                         | ENST00000397283 | -0,706283024 |
| A_24_P139191  | NM_031483    | ITCH      | itchy E3 ubiquitin protein ligase homolog (mouse)               | ENST00000374864 | -0,706403047 |
| A_24_P64167   | NM_000962    | PTGS1     | prostaglandin-endoperoxide synthase 1 (prostaglandin G/H        | ENST00000362012 | -0,706549092 |
| A_23_P1331    | NM_080801    | COL13A1   | collagen, type XIII, alpha 1                                    | ENST00000478219 | -0,706573055 |
| A_23_P256956  | NM_005733    | KIF20A    | kinesin family member 20A                                       | ENST00000502338 | -0,707393176 |
| A_24_P96403   | NM_001001890 | RUNX1     | runt-related transcription factor 1                             | ENST00000344691 | -0,707543675 |
| A_23_P354288  | NM_153606    | FAM71A    | family with sequence similarity 71, member A                    | ENST00000545975 | -0,707591271 |
| A_24_P286114  | NM_004172    | SLC1A3    | solute carrier family 1 (glial high affinity glutamate transpor | ENST00000381918 | -0,707871003 |
| A_24_P354724  | NM_054114    | TAGAP     | T-cell activation RhoGTPase activating protein                  | ENST00000326965 | -0,707904339 |
| A_23_P369815  | NM_000639    | FASLG     | Fas ligand (TNF superfamily, member 6)                          | ENST00000367721 | -0,707980652 |
| A_33_P3306342 | NM_001001922 | OR52N5    | olfactory receptor, family 52, subfamily N, member 5            | ENST00000317093 | -0,708204982 |
| A_23_P154855  | NM_000219    | KCNE1     | potassium voltage-gated channel, Isk-related family, memb       | ENST00000416357 | -0,708501099 |
| A_23_P101671  | NM_033064    | ATCAY     | ataxia, cerebellar, Cayman type                                 | ENST00000450849 | -0,708865044 |
| A_23_P421423  | NM_006291    | TNFAIP2   | tumor necrosis factor, alpha-induced protein 2                  | ENST00000333007 | -0,709153444 |
| A_33_P3212232 | NM_001039396 | MPEG1     | macrophage expressed 1                                          | ENST00000361050 | -0,709343467 |
| A_33_P3867584 | NR_038863    | LOC285758 | uncharacterized LOC285758                                       |                 | -0,709498199 |
| A_23_P118815  | NM_001012271 | BIRC5     | baculoviral IAP repeat containing 5                             | ENST00000301633 | -0,70961553  |



|                |                |              |                                                          |                 |              |
|----------------|----------------|--------------|----------------------------------------------------------|-----------------|--------------|
| A_23_P371215   | NM_012092      | ICOS         | inducible T-cell co-stimulator                           | ENST00000316386 | -0,709630142 |
| A_23_P121144   | NM_144634      | LYZL4        | lysozyme-like 4                                          | ENST00000470991 | -0,710289505 |
| A_23_P305198   | NM_003151      | STAT4        | signal transducer and activator of transcription 4       | ENST00000450994 | -0,710295582 |
| A_23_P121064   | NM_002852      | PTX3         | pentraxin 3, long                                        | ENST00000295927 | -0,710466057 |
| A_23_P111583   | NM_001001547   | CD36         | CD36 molecule (thrombospondin receptor)                  | ENST00000419819 | -0,710473112 |
| A_19_P00805272 | NM_001145206   | KIAA1671     |                                                          | ENST00000358431 | -0,7107481   |
| A_23_P11070    | NM_032553      | GPR174       | G protein-coupled receptor 174                           | ENST00000276077 | -0,710861544 |
| A_24_P935103   | NM_001116      | ADCY9        | adenylate cyclase 9                                      | ENST00000294016 | -0,711097161 |
| A_23_P120822   | NM_016327      | UPB1         | ureidopropionase, beta                                   | ENST00000326010 | -0,711337998 |
| A_21_P0002261  | TCONS_00003800 | XLOC_001595  |                                                          |                 | -0,711428049 |
| A_33_P3281572  | NR_002174      | CMAHP        | cytidine monophospho-N-acetylneuraminic acid hydroxylas  | ENST00000377993 | -0,711949864 |
| A_23_P116829   | NM_003348      | UBE2N        | ubiquitin-conjugating enzyme E2N                         | ENST00000318066 | -0,71218683  |
| A_23_P352266   | NM_000633      | BCL2         | B-cell CLL/lymphoma 2                                    | ENST00000398117 | -0,712241759 |
| A_23_P143173   | NM_032214      | SLA2         | Src-like-adaptor 2                                       | ENST00000360672 | -0,712426966 |
| A_21_P0002810  | XR_108518      | LOC100505609 | uncharacterized LOC100505609                             | ENST00000464537 | -0,712850258 |
| A_23_P205370   | NM_016150      | ASB2         | ankyrin repeat and SOCS box containing 2                 | ENST00000553883 | -0,71286021  |
| A_21_P0000166  | NM_001205281   | LOC100506012 | serine/threonine-protein phosphatase 5-like              |                 | -0,713023303 |
| A_24_P217904   | NM_033502      | TRERF1       | transcriptional regulating factor 1                      | ENST00000372922 | -0,713131005 |
| A_21_P0000575  | NR_029193      | LOC100287216 | uncharacterized LOC100287216                             |                 | -0,713158724 |
| A_33_P3274416  | NR_034179      | LOC653712    | intraflagellar transport 122 homolog (Chlamydomonas) pse | ENST00000480931 | -0,713523741 |
| A_33_P3236661  | BC150296       | PCDH9        | protocadherin 9                                          |                 | -0,713918558 |
| A_33_P3259890  | NR_033932      | FLJ35946     | uncharacterized protein FLJ35946                         | ENST00000515003 | -0,714107189 |
| A_24_P14464    | NM_006103      | WFDC2        | WAP four-disulfide core domain 2                         | ENST00000372676 | -0,714233879 |
| A_23_P138194   | NM_000433      | NCF2         | neutrophil cytosolic factor 2                            | ENST00000392014 | -0,714733976 |
| A_23_P206901   | NM_017668      | NDE1         | nudE nuclear distribution gene E homolog 1 (A. nidulans) | ENST00000396355 | -0,714751706 |
| A_23_P118815   | NM_001012271   | BIRC5        | baculoviral IAP repeat containing 5                      | ENST00000301633 | -0,715092815 |
| A_21_P0005725  | TCONS_00014766 | XLOC_006849  |                                                          |                 | -0,715180978 |
| A_23_P120467   | NM_199427      | ZFP64        | zinc finger protein 64 homolog (mouse)                   | ENST00000361387 | -0,715341853 |
| A_23_P103486   | NM_000775      | CYP2J2       | cytochrome P450, family 2, subfamily J, polypeptide 2    | ENST00000469406 | -0,715510517 |

|                |                 |              |                                                                                    |                 |              |
|----------------|-----------------|--------------|------------------------------------------------------------------------------------|-----------------|--------------|
| A_24_P350576   | NM_015028       | TNIK         | TRAF2 and NCK interacting kinase                                                   | ENST00000369326 | -0,715864094 |
| A_23_P218770   | NM_002872       | RAC2         | ras-related C3 botulinum toxin substrate 2 (rho family, small GTP-binding protein) | ENST00000249071 | -0,715958656 |
| A_32_P128258   | NR_002804       | SIGLECP3     | sialic acid binding Ig-like lectin, pseudogene 3                                   |                 | -0,716348326 |
| A_23_P352266   | NM_000633       | BCL2         | B-cell CLL/lymphoma 2                                                              | ENST00000398117 | -0,71673345  |
| A_21_P0001475  | ENST00000455966 | XLOC_000732  |                                                                                    | ENST00000455966 | -0,717678537 |
| A_23_P204158   | NM_032814       | RNFT2        | ring finger protein, transmembrane 2                                               | ENST00000547718 | -0,717818986 |
| A_19_P00317412 | NR_038842       | LOC728431    | uncharacterized LOC728431                                                          | ENST00000424989 | -0,717884915 |
| A_21_P0013589  | XR_108989       | LOC100507540 | uncharacterized LOC100507540                                                       |                 | -0,718007821 |
| A_33_P3242883  | NM_005222       | DLX6         | distal-less homeobox 6                                                             | ENST00000518156 | -0,718221989 |
| A_23_P253321   | NM_006228       | PNOC         | prepronociceptin                                                                   | ENST00000301908 | -0,71833125  |
| A_23_P99452    | NM_000059       | BRCA2        | breast cancer 2, early onset                                                       | ENST00000380152 | -0,71841209  |
| A_23_P406025   | NM_015225       | PRUNE2       | prune homolog 2 (Drosophila)                                                       | ENST00000428286 | -0,718418795 |
| A_23_P118834   | NM_001067       | TOP2A        | topoisomerase (DNA) II alpha 170kDa                                                | ENST00000269577 | -0,718801274 |
| A_33_P3242623  | NM_014331       | SLC7A11      | solute carrier family 7 (anionic amino acid transporter light chain)               | ENST00000280612 | -0,718833048 |
| A_21_P0009753  | THC2527567      | XLOC_013282  |                                                                                    |                 | -0,719303333 |
| A_23_P255618   | NM_080723       | NRSN1        | neurensin 1                                                                        | ENST00000378491 | -0,719313117 |
| A_33_P3240632  | NM_001136271    | NKX2-6       | NK2 homeobox 6                                                                     | ENST00000325017 | -0,719918941 |
| A_24_P13715    | NM_147188       | FBXO22       | F-box protein 22                                                                   | ENST00000308275 | -0,720049726 |
| A_24_P588897   | NM_013272       | SLCO3A1      | solute carrier organic anion transporter family, member 3A                         | ENST00000318445 | -0,720460545 |
| A_24_P345679   | NM_001195432    | MLF1         | myeloid leukemia factor 1                                                          | ENST00000355893 | -0,720544431 |
| A_23_P118815   | NM_001012271    | BIRC5        | baculoviral IAP repeat containing 5                                                | ENST00000301633 | -0,720675323 |
| A_33_P3330872  | NM_078629       | MSL3         | male-specific lethal 3 homolog (Drosophila)                                        | ENST00000380692 | -0,720706721 |
| A_23_P100386   | NM_152456       | IL34         | interleukin 34                                                                     | ENST00000429149 | -0,720833369 |
| A_23_P109171   | NM_001195       | BFSP1        | beaded filament structural protein 1, filensin                                     | ENST00000536626 | -0,720920796 |
| A_21_P0002772  | AK097380        | CHST2        | carbohydrate (N-acetylglucosamine-6-O) sulfotransferase 2                          | ENST00000465880 | -0,721557276 |
| A_33_P3352827  | NM_003037       | SLAMF1       | signaling lymphocytic activation molecule family member 1                          | ENST00000355199 | -0,721733621 |
| A_33_P3715843  | BC032242        | MGC40069     | uncharacterized protein MGC40069                                                   |                 | -0,721764287 |
| A_33_P3323718  | NM_001008224    | UACA         | uveal autoantigen with coiled-coil domains and ankyrin repeats                     | ENST00000379983 | -0,721920298 |
| A_21_P0007606  | TCONS_00020518  | XLOC_009836  |                                                                                    |                 | -0,721948482 |

|                |                 |                |                                                             |                 |              |
|----------------|-----------------|----------------|-------------------------------------------------------------|-----------------|--------------|
| A_33_P3211432  | NM_000265       | NCF1           | neutrophil cytosolic factor 1                               | ENST00000289473 | -0,721968141 |
| A_23_P116512   | NM_024841       | PRR5L          | proline rich 5 like                                         | ENST00000389693 | -0,722780732 |
| A_23_P113393   | NM_017413       | APLN           | apelin                                                      | ENST00000307484 | -0,722798263 |
| A_23_P121480   | NM_001004196    | CD200          | CD200 molecule                                              | ENST00000478595 | -0,723200288 |
| A_23_P109913   | NM_006564       | CXCR6          | chemokine (C-X-C motif) receptor 6                          | ENST00000438735 | -0,723210301 |
| A_24_P370472   | NM_021983       | HLA-DRB4       | major histocompatibility complex, class II, DR beta 4       | ENST00000411959 | -0,723218112 |
| A_23_P139687   | NM_152321       | ERP27          | endoplasmic reticulum protein 27                            | ENST00000266397 | -0,723478878 |
| A_24_P176493   | NM_015251       | ATMIN          | ATM interactor                                              | ENST00000299575 | -0,724323994 |
| A_23_P131789   | NM_001725       | BPI            | bactericidal/permeability-increasing protein                | ENST00000489102 | -0,72440036  |
| A_24_P69053    | NM_001080477    | ODZ3           | odz, odd Oz/ten-m homolog 3 (Drosophila)                    | ENST00000406950 | -0,724686423 |
| A_23_P401547   | NM_015480       | PVRL3          | poliovirus receptor-related 3                               | ENST00000319792 | -0,724830717 |
| A_33_P3382162  | NM_000449       | RFX5           | regulatory factor X, 5 (influences HLA class II expression) | ENST00000368870 | -0,725002137 |
| A_23_P105862   | NM_023037       | FRY            | furry homolog (Drosophila)                                  | ENST00000380257 | -0,725147095 |
| A_23_P4082     | NM_006584       | CCT6B          | chaperonin containing TCP1, subunit 6B (zeta 2)             | ENST00000436961 | -0,725249331 |
| A_23_P344555   | NM_006403       | NEDD9          | neural precursor cell expressed, developmentally down-reg   | ENST00000448183 | -0,725466687 |
| A_23_P105862   | NM_023037       | FRY            | furry homolog (Drosophila)                                  | ENST00000380257 | -0,725493484 |
| A_23_P357881   | NM_172102       | CD8B           | CD8b molecule                                               | ENST00000416057 | -0,725562228 |
| A_24_P256692   | NM_198551       | MIA3           | melanoma inhibitory activity family, member 3               | ENST00000344441 | -0,725711334 |
| A_24_P260101   | NM_007289       | MME            | membrane metallo-endopeptidase                              | ENST00000460393 | -0,725947502 |
| A_23_P99452    | NM_000059       | BRCA2          | breast cancer 2, early onset                                | ENST00000380152 | -0,726181221 |
| A_33_P3266674  | NM_025224       | ZBTB46         | zinc finger and BTB domain containing 46                    | ENST00000302995 | -0,726451041 |
| A_23_P155848   | NM_014421       | DKK2           | dickkopf 2 homolog (Xenopus laevis)                         | ENST00000285311 | -0,726659562 |
| A_33_P3319870  | NM_001191323    | GREM1          | gremlin 1                                                   | ENST00000322805 | -0,726765557 |
| A_33_P3271111  | NM_004148       | NINJ1          | ninjurin 1                                                  | ENST00000489274 | -0,726887303 |
| A_23_P58132    | NM_004310       | RHOH           | ras homolog gene family, member H                           | ENST00000381799 | -0,726901638 |
| A_23_P121064   | NM_002852       | PTX3           | pentraxin 3, long                                           | ENST00000295927 | -0,727420324 |
| A_23_P41194    | NM_153353       | LRRC34         | leucine rich repeat containing 34                           | ENST00000522329 | -0,727547188 |
| A_21_P0000631  | NR_034079       | LOC643733      | caspase 4, apoptosis-related cysteine peptidase pseudogen   | ENST00000531091 | -0,727794649 |
| A_19_P00320173 | ENST00000382488 | XLOC_l2_010565 |                                                             | ENST00000382488 | -0,727942827 |

|                |                 |              |                                                       |                 |              |
|----------------|-----------------|--------------|-------------------------------------------------------|-----------------|--------------|
| A_23_P121064   | NM_002852       | PTX3         | pentraxin 3, long                                     | ENST00000295927 | -0,728209898 |
| A_23_P109913   | NM_006564       | CXCR6        | chemokine (C-X-C motif) receptor 6                    | ENST00000438735 | -0,728281284 |
| A_24_P943997   | NM_178815       | ARL5B        | ADP-ribosylation factor-like 5B                       | ENST00000377275 | -0,728454191 |
| A_21_P0002493  | THC2716004      | XLOC_002277  |                                                       |                 | -0,72860668  |
| A_33_P3258452  | NM_020375       | C12orf5      | chromosome 12 open reading frame 5                    |                 | -0,729704763 |
| A_23_P121064   | NM_002852       | PTX3         | pentraxin 3, long                                     | ENST00000295927 | -0,729764157 |
| A_21_P0014727  | NR_040671       | LOC100288198 | uncharacterized LOC100288198                          |                 | -0,729850512 |
| A_21_P0006726  | ENST00000418372 | XLOC_008700  |                                                       | ENST00000418372 | -0,729921147 |
| A_24_P12435    | NM_181782       | NCOA7        | nuclear receptor coactivator 7                        | ENST00000368357 | -0,730230461 |
| A_33_P3278362  | NM_020349       | ANKRD2       | ankyrin repeat domain 2 (stretch responsive muscle)   | ENST00000307518 | -0,730319521 |
| A_19_P00316743 | NR_027103       | LOC285375    | uncharacterized LOC285375                             | ENST00000419618 | -0,730726825 |
| A_33_P3277988  | NM_000629       | IFNAR1       | interferon (alpha, beta and omega) receptor 1         | ENST00000270139 | -0,73094938  |
| A_23_P116653   | NM_138722       | BCL2L14      | BCL2-like 14 (apoptosis facilitator)                  | ENST00000396369 | -0,731294916 |
| A_23_P216894   | NM_001006617    | MAPKAP1      | mitogen-activated protein kinase associated protein 1 | ENST00000373505 | -0,731424234 |
| A_24_P153568   | NM_001039396    | MPEG1        | macrophage expressed 1                                | ENST00000361050 | -0,732006967 |
| A_23_P403588   | NM_017944       | USP47        | ubiquitin specific peptidase 47                       | ENST00000305481 | -0,732141172 |
| A_24_P317907   | NM_001034954    | SORBS1       | sorbin and SH3 domain containing 1                    | ENST00000371247 | -0,732149234 |
| A_33_P3384871  | NM_001142522    | FBXO5        | F-box protein 5                                       | ENST00000477822 | -0,732381861 |
| A_21_P0009401  | TCONS_00026020  | XLOC_012360  |                                                       |                 | -0,732455856 |
| A_33_P3282566  | NM_017728       | TMEM104      | transmembrane protein 104                             | ENST00000335464 | -0,73279882  |
| A_23_P156667   | NM_002714       | PPP1R10      | protein phosphatase 1, regulatory subunit 10          | ENST00000376511 | -0,732965037 |
| A_19_P00318323 | NR_015410       | LINC00340    | long intergenic non-protein coding RNA 340            |                 | -0,733086076 |
| A_21_P0001164  | ENST00000415166 | XLOC_000955  |                                                       | ENST00000415166 | -0,733169906 |
| A_23_P154849   | NM_138983       | OLIG1        | oligodendrocyte transcription factor 1                | ENST00000426947 | -0,733182366 |
| A_23_P312920   | NM_006235       | POU2AF1      | POU class 2 associating factor 1                      | ENST00000393067 | -0,733291456 |
| A_23_P121064   | NM_002852       | PTX3         | pentraxin 3, long                                     | ENST00000295927 | -0,73336545  |
| A_33_P3389704  | NM_001266       | CES1         | carboxylesterase 1                                    | ENST00000422046 | -0,733569335 |
| A_23_P23074    | NM_006417       | IFI44        | interferon-induced protein 44                         | ENST00000485662 | -0,733771513 |
| A_21_P0004845  | TCONS_00011705  | XLOC_005183  |                                                       |                 | -0,734031477 |

|                |                 |                |                                                             |                 |              |
|----------------|-----------------|----------------|-------------------------------------------------------------|-----------------|--------------|
| A_23_P156826   | NM_032744       | C6orf105       | chromosome 6 open reading frame 105                         | ENST00000514824 | -0,734134096 |
| A_24_P68783    | NM_012275       | IL36RN         | interleukin 36 receptor antagonist                          | ENST00000393200 | -0,734219667 |
| A_23_P104438   | NM_032578       | MYPN           | myopalladin                                                 | ENST00000354393 | -0,734226453 |
| A_23_P103617   | NM_003568       | ANXA9          | annexin A9                                                  | ENST00000368947 | -0,734259026 |
| A_21_P0002208  | TCONS_00003664  | XLOC_001454    |                                                             |                 | -0,734316865 |
| A_23_P257971   | NM_001353       | AKR1C1         | aldo-keto reductase family 1, member C1 (dihydrodiol dehy   | ENST00000460124 | -0,734671539 |
| A_23_P380857   | NM_030643       | APOL4          | apolipoprotein L, 4                                         | ENST00000479929 | -0,734785106 |
| A_24_P227927   | NM_181078       | IL21R          | interleukin 21 receptor                                     | ENST00000337929 | -0,734820925 |
| A_23_P321388   | NM_153341       | RNF19B         | ring finger protein 19B                                     | ENST00000405457 | -0,734887433 |
| A_33_P3304372  | NM_018342       | TMEM144        | transmembrane protein 144                                   | ENST00000511532 | -0,734973111 |
| A_33_P3375766  | NM_139137       | KCNC2          | potassium voltage-gated channel, Shaw-related subfamily, i  | ENST00000350228 | -0,735250743 |
| A_19_P00802257 | NR_038842       | LOC728431      | uncharacterized LOC728431                                   | ENST00000424989 | -0,735379251 |
| A_23_P99452    | NM_000059       | BRCA2          | breast cancer 2, early onset                                | ENST00000380152 | -0,735774543 |
| A_24_P347378   | NM_001629       | ALOX5AP        | arachidonate 5-lipoxygenase-activating protein              | ENST00000380490 | -0,736182009 |
| A_23_P105862   | NM_023037       | FRY            | furry homolog (Drosophila)                                  | ENST00000380257 | -0,736511821 |
| A_23_P103486   | NM_000775       | CYP2J2         | cytochrome P450, family 2, subfamily J, polypeptide 2       | ENST00000469406 | -0,736560759 |
| A_23_P388190   | NM_033081       | DIDO1          | death inducer-obliterator 1                                 | ENST00000461792 | -0,736844864 |
| A_23_P118815   | NM_001012271    | BIRC5          | baculoviral IAP repeat containing 5                         | ENST00000301633 | -0,736952697 |
| A_33_P3409944  | NM_005272       | GNAT2          | guanine nucleotide binding protein (G protein), alpha trans | ENST00000351050 | -0,737140448 |
| A_23_P369815   | NM_000639       | FASLG          | Fas ligand (TNF superfamily, member 6)                      | ENST00000367721 | -0,73717968  |
| A_23_P138507   | NM_001786       | CDK1           | cyclin-dependent kinase 1                                   | ENST00000448257 | -0,737363761 |
| A_33_P3279431  | NM_001007024    | GOSR1          | golgi SNAP receptor complex member 1                        | ENST00000414833 | -0,73746189  |
| A_24_P290751   | NM_004416       | DTX1           | deltex homolog 1 (Drosophila)                               | ENST00000547974 | -0,737811756 |
| A_21_P0003036  | TCONS_00006248  | XLOC_002841    |                                                             |                 | -0,738470699 |
| A_33_P3304668  | NM_000088       | COL1A1         | collagen, type I, alpha 1                                   | ENST00000225964 | -0,738661645 |
| A_23_P147025   | NM_004794       | RAB33A         | RAB33A, member RAS oncogene family                          | ENST00000257017 | -0,738895821 |
| A_23_P70785    | NM_001624       | AIM1           | absent in melanoma 1                                        | ENST00000369066 | -0,739149677 |
| A_21_P0011035  | ENST00000537616 | XLOC_l2_002886 |                                                             | ENST00000537616 | -0,739681064 |
| A_23_P114740   | NM_000186       | CFH            | complement factor H                                         | ENST00000466229 | -0,74004281  |



|               |                                 |              |                                                                    |                 |              |
|---------------|---------------------------------|--------------|--------------------------------------------------------------------|-----------------|--------------|
| A_23_P118815  | NM_001012271                    | BIRC5        | baculoviral IAP repeat containing 5                                | ENST00000301633 | -0,74064416  |
| A_23_P421306  | NM_177963                       | SYT12        | synaptotagmin XII                                                  | ENST00000393946 | -0,741482167 |
| A_23_P109171  | NM_001195                       | BFSP1        | beaded filament structural protein 1, filensin                     | ENST00000536626 | -0,741683702 |
| A_33_P3335571 | NR_029192                       | LOC100133315 | transient receptor potential cation channel, subfamily C, member 1 | ENST00000532852 | -0,741763169 |
| A_23_P69383   | NM_031458                       | PARP9        | poly (ADP-ribose) polymerase family, member 9                      | ENST00000452457 | -0,742025057 |
| A_23_P50096   | NM_001071                       | TYMS         | thymidylate synthetase                                             | ENST00000323274 | -0,742030673 |
| A_23_P18692   | NM_000671                       | ADH5         | alcohol dehydrogenase 5 (class III), chi polypeptide               | ENST00000296412 | -0,742304381 |
| A_33_P3248982 | NM_012306                       | FAIM2        | Fas apoptotic inhibitory molecule 2                                | ENST00000320634 | -0,742574124 |
| A_23_P114883  | NM_002023                       | FMOD         | fibromodulin                                                       | ENST00000354955 | -0,743126043 |
| A_21_P0010209 | ENST00000431150                 | XLOC_014097  |                                                                    | ENST00000431150 | -0,743448833 |
| A_23_P121064  | NM_002852                       | PTX3         | pentraxin 3, long                                                  | ENST00000295927 | -0,743458105 |
| A_23_P113161  | NM_030806                       | C1orf21      | chromosome 1 open reading frame 21                                 | ENST00000235307 | -0,743539547 |
| A_21_P0010605 | TCONS_I2_0000107;XLOC_I2_000804 |              |                                                                    |                 | -0,743875938 |
| A_33_P3389653 | NM_001165899                    | PDE4D        | phosphodiesterase 4D, cAMP-specific                                | ENST00000356665 | -0,744278266 |
| A_23_P105862  | NM_023037                       | FRY          | furry homolog (Drosophila)                                         | ENST00000380257 | -0,744591795 |
| A_23_P100386  | NM_152456                       | IL34         | interleukin 34                                                     | ENST00000429149 | -0,744658785 |
| A_23_P120822  | NM_016327                       | UPB1         | ureidopropionase, beta                                             | ENST00000326010 | -0,74466166  |
| A_23_P250358  | NM_017912                       | HERC6        | hect domain and RLD 6                                              | ENST00000511939 | -0,744958316 |
| A_23_P116829  | NM_003348                       | UBE2N        | ubiquitin-conjugating enzyme E2N                                   | ENST00000318066 | -0,745098829 |
| A_33_P3734378 | NR_027118                       | LOC285954    | uncharacterized LOC285954                                          | ENST00000415848 | -0,745403671 |
| A_23_P82523   | NM_000927                       | ABCB1        | ATP-binding cassette, sub-family B (MDR/TAP), member 1             | ENST00000475929 | -0,745469974 |
| A_23_P118834  | NM_001067                       | TOP2A        | topoisomerase (DNA) II alpha 170kDa                                | ENST00000269577 | -0,745861184 |
| A_23_P103511  | NM_001085375                    | C1orf226     | chromosome 1 open reading frame 226                                | ENST00000458626 | -0,745952751 |
| A_23_P200138  | NM_020125                       | SLAMF8       | SLAM family member 8                                               | ENST00000289707 | -0,74599368  |
| A_32_P176911  | NR_026774                       | LINC00239    | long intergenic non-protein coding RNA 239                         | ENST00000556973 | -0,746152975 |
| A_23_P69310   | NM_003965                       | CCRL2        | chemokine (C-C motif) receptor-like 2                              | ENST00000400882 | -0,746173083 |
| A_21_P0014880 | XR_132792                       | LOC100652751 | uncharacterized LOC100652751                                       |                 | -0,746681097 |
| A_33_P3352877 | NM_015087                       | SPG20        | spastic paraplegia 20 (Troyer syndrome)                            | ENST00000423217 | -0,746725772 |
| A_23_P105862  | NM_023037                       | FRY          | furry homolog (Drosophila)                                         | ENST00000380257 | -0,746959174 |

|               |                 |             |                                                                                     |                 |              |
|---------------|-----------------|-------------|-------------------------------------------------------------------------------------|-----------------|--------------|
| A_33_P3832872 | NR_033995       | LOC389247   | uncharacterized LOC389247                                                           |                 | -0,747018659 |
| A_21_P0007545 | TCONS_00020388  | XLOC_009723 |                                                                                     |                 | -0,747034532 |
| A_33_P3226835 | NM_025052       | YSK4        | YSK4 Sps1/Ste20-related kinase homolog ( <i>S. cerevisiae</i> )                     | ENST00000392917 | -0,747062058 |
| A_23_P45099   | NM_002125       | HLA-DRB5    | major histocompatibility complex, class II, DR beta 5                               | ENST00000374975 | -0,747073222 |
| A_33_P3277373 | NM_020530       | OSM         | oncostatin M                                                                        | ENST00000215781 | -0,747744458 |
| A_21_P0001647 | ENST00000549744 | XLOC_001266 |                                                                                     | ENST00000549744 | -0,747870142 |
| A_23_P111995  | NM_002318       | LOXL2       | lysyl oxidase-like 2                                                                | ENST00000389131 | -0,748288136 |
| A_23_P218068  | NM_019012       | PLEKHA5     | pleckstrin homology domain containing, family A member 5                            | ENST00000542828 | -0,748515712 |
| A_24_P277657  | NM_006877       | GMPR        | guanosine monophosphate reductase                                                   | ENST00000540478 | -0,749501085 |
| A_23_P419714  | NM_001018072    | BTBD11      | BTB (POZ) domain containing 11                                                      | ENST00000280758 | -0,749564196 |
| A_23_P41424   | NM_022154       | SLC39A8     | solute carrier family 39 (zinc transporter), member 8                               | ENST00000394833 | -0,750044835 |
| A_21_P0007790 | THC2671543      | XLOC_010245 |                                                                                     |                 | -0,750276418 |
| A_24_P239606  | NM_015675       | GADD45B     | growth arrest and DNA-damage-inducible, beta                                        | ENST00000215631 | -0,750473208 |
| A_23_P157865  | NM_002160       | TNC         | tenascin C                                                                          | ENST00000350763 | -0,750806061 |
| A_23_P360754  | NM_005099       | ADAMTS4     | ADAM metallopeptidase with thrombospondin type 1 motif                              | ENST00000367996 | -0,750831875 |
| A_23_P379200  | NM_175736       | FMNL3       | formin-like 3                                                                       | ENST00000335154 | -0,75089017  |
| A_23_P819     | NM_005101       | ISG15       | ISG15 ubiquitin-like modifier                                                       | ENST00000379389 | -0,751094567 |
| A_21_P0010405 | THC2613584      | XLOC_014192 |                                                                                     |                 | -0,751310353 |
| A_23_P306890  | NM_007195       | POLI        | polymerase (DNA directed) iota                                                      | ENST00000217800 | -0,751375654 |
| A_23_P153562  | NM_001736       | C5AR1       | complement component 5a receptor 1                                                  | ENST00000355085 | -0,751517673 |
| A_23_P152782  | NM_005533       | IFI35       | interferon-induced protein 35                                                       | ENST00000538473 | -0,751686426 |
| A_23_P113777  | NM_004791       | ITGBL1      | integrin, beta-like 1 (with EGF-like repeat domains)                                | ENST00000376162 | -0,752455486 |
| A_32_P132317  | NM_001033045    | GPR155      | G protein-coupled receptor 155                                                      | ENST00000392552 | -0,752722267 |
| A_23_P19816   | NM_030936       | RNF32       | ring finger protein 32                                                              | ENST00000405335 | -0,752843167 |
| A_24_P233488  | NM_002309       | LIF         | leukemia inhibitory factor (cholinergic differentiation factor)                     | ENST00000249075 | -0,752886277 |
| A_24_P158089  | NM_000602       | SERPINE1    | serpin peptidase inhibitor, clade E (nexin, plasminogen activator inhibitor type 1) | ENST00000445463 | -0,753856257 |
| A_23_P256948  | NM_005098       | MSC         | musculin                                                                            | ENST00000325509 | -0,754096508 |
| A_33_P3284129 | NM_144586       | LYPD1       | LY6/PLAUR domain containing 1                                                       | ENST00000397463 | -0,754280772 |
| A_23_P111701  | NM_004126       | GNG11       | guanine nucleotide binding protein (G protein), gamma 11                            | ENST00000248564 | -0,754598307 |

|               |                 |             |                                                                                     |                 |              |
|---------------|-----------------|-------------|-------------------------------------------------------------------------------------|-----------------|--------------|
| A_24_P353638  | NM_021181       | SLAMF7      | SLAM family member 7                                                                | ENST00000466792 | -0,754603558 |
| A_23_P116829  | NM_003348       | UBE2N       | ubiquitin-conjugating enzyme E2N                                                    | ENST00000318066 | -0,754608381 |
| A_23_P118815  | NM_001012271    | BIRC5       | baculoviral IAP repeat containing 5                                                 | ENST00000301633 | -0,754612243 |
| A_21_P0001876 | ENST00000415138 | XLOC_001517 |                                                                                     | ENST00000415138 | -0,754678822 |
| A_23_P105545  | NM_016830       | VAMP1       | vesicle-associated membrane protein 1 (synaptobrevin 1)                             | ENST00000535927 | -0,754716471 |
| A_24_P362193  | NM_003874       | CD84        | CD84 molecule                                                                       | ENST00000368047 | -0,755311142 |
| A_23_P9523    | NM_022128       | RBKS        | ribokinase                                                                          | ENST00000449378 | -0,75546202  |
| A_23_P119778  | NM_020342       | SLC39A10    | solute carrier family 39 (zinc transporter), member 10                              | ENST00000409086 | -0,755789948 |
| A_23_P105465  | NM_004072       | CMKLR1      | chemokine-like receptor 1                                                           | ENST00000550402 | -0,755957981 |
| A_23_P206359  | NM_004360       | CDH1        | cadherin 1, type 1, E-cadherin (epithelial)                                         | ENST00000261769 | -0,756034299 |
| A_23_P107454  | NM_031958       | KRTAP3-1    | keratin associated protein 3-1                                                      | ENST00000391588 | -0,75608548  |
| A_24_P122921  | NM_138621       | BCL2L11     | BCL2-like 11 (apoptosis facilitator)                                                |                 | -0,756129188 |
| A_24_P158089  | NM_000602       | SERPINE1    | serpin peptidase inhibitor, clade E (nexin, plasminogen activator inhibitor type 1) | ENST00000445463 | -0,756575808 |
| A_21_P0002570 | TCONS_00004689  | XLOC_001331 |                                                                                     |                 | -0,75680322  |
| A_24_P261169  | NM_006378       | SEMA4D      | sema domain, immunoglobulin domain (Ig), transmembrane protein, semaphorin 4D       | ENST00000422704 | -0,756818176 |
| A_33_P3294237 | NM_005955       | MTF1        | metal-regulatory transcription factor 1                                             |                 | -0,756951004 |
| A_33_P3228828 | ENST00000531326 | PTPN11      | protein tyrosine phosphatase, non-receptor type 11                                  | ENST00000531326 | -0,756978891 |
| A_23_P35219   | NM_002497       | NEK2        | NIMA (never in mitosis gene a)-related kinase 2                                     | ENST00000462283 | -0,757242671 |
| A_23_P216340  | NM_001045556    | SLA         | Src-like-adaptor                                                                    | ENST00000338087 | -0,757369288 |
| A_21_P0008511 | THC2682134      | XLOC_010811 |                                                                                     |                 | -0,757487768 |
| A_33_P3361741 | NM_013238       | DNAJC15     | DnaJ (Hsp40) homolog, subfamily C, member 15                                        |                 | -0,757488301 |
| A_33_P3423440 | NM_001130913    | ZNF720      | zinc finger protein 720                                                             | ENST00000316491 | -0,757664346 |
| A_23_P105545  | NM_016830       | VAMP1       | vesicle-associated membrane protein 1 (synaptobrevin 1)                             | ENST00000535927 | -0,757887583 |
| A_33_P3240532 | NM_015149       | RGL1        | regulator of G-protein signaling 1                                                  | ENST00000367531 | -0,758081116 |
| A_24_P393372  | NM_001100913    | PACS2       | phosphofurin acidic cluster sorting protein 2                                       | ENST00000447393 | -0,758243929 |
| A_33_P3340655 | NM_052904       | KLHL32      | kelch-like 32 (Drosophila)                                                          | ENST00000369255 | -0,758535955 |
| A_23_P109913  | NM_006564       | CXCR6       | chemokine (C-X-C motif) receptor 6                                                  | ENST00000438735 | -0,758583813 |
| A_23_P113793  | NM_024508       | ZBED2       | zinc finger, BED-type containing 2                                                  | ENST00000317012 | -0,758592002 |
| A_23_P42353   | NM_016135       | ETV7        | ets variant 7                                                                       | ENST00000339796 | -0,759223432 |

|                |                 |              |                                                                                     |                 |              |
|----------------|-----------------|--------------|-------------------------------------------------------------------------------------|-----------------|--------------|
| A_23_P118815   | NM_001012271    | BIRC5        | baculoviral IAP repeat containing 5                                                 | ENST00000301633 | -0,759266052 |
| A_33_P3309556  | NM_006504       | PTPRE        | protein tyrosine phosphatase, receptor type, E                                      |                 | -0,759391282 |
| A_23_P101246   | NM_001163922    | VSIG10L      | V-set and immunoglobulin domain containing 10 like                                  | ENST00000335624 | -0,759553337 |
| A_21_P0006078  | CR627148        | XLOC_007710  |                                                                                     |                 | -0,759650877 |
| A_24_P158089   | NM_000602       | SERPINE1     | serpin peptidase inhibitor, clade E (nexin, plasminogen activator inhibitor type 1) | ENST00000445463 | -0,759884651 |
| A_23_P118834   | NM_001067       | TOP2A        | topoisomerase (DNA) II alpha 170kDa                                                 | ENST00000269577 | -0,760009279 |
| A_23_P118      | NM_001439       | EXTL2        | exostoses (multiple)-like 2                                                         | ENST00000370114 | -0,760537312 |
| A_23_P344568   | NM_145019       | FAM124A      | family with sequence similarity 124A                                                | ENST00000280057 | -0,760928571 |
| A_21_P0013960  | XM_003118581    | LOC100507508 | uncharacterized LOC100507508                                                        | ENST00000441971 | -0,760962624 |
| A_33_P3335506  | ENST00000368190 | FCRL5        | Fc receptor-like 5                                                                  | ENST00000368190 | -0,760984314 |
| A_21_P0003901  | ENST00000505454 | XLOC_004091  |                                                                                     | ENST00000505454 | -0,761183122 |
| A_23_P105862   | NM_023037       | FRY          | furry homolog (Drosophila)                                                          | ENST00000380257 | -0,761183221 |
| A_23_P120822   | NM_016327       | UPB1         | ureidopropionase, beta                                                              | ENST00000326010 | -0,761346809 |
| A_23_P118815   | NM_001012271    | BIRC5        | baculoviral IAP repeat containing 5                                                 | ENST00000301633 | -0,761738247 |
| A_23_P62659    | NM_000310       | PPT1         | palmitoyl-protein thioesterase 1                                                    | ENST00000433473 | -0,761909266 |
| A_23_P34345    | NM_001078       | VCAM1        | vascular cell adhesion molecule 1                                                   | ENST00000370119 | -0,762030356 |
| A_23_P218412   | NM_004890       | SPAG7        | sperm associated antigen 7                                                          | ENST00000206020 | -0,762056753 |
| A_24_P48204    | NM_003004       | SECTM1       | secreted and transmembrane 1                                                        | ENST00000269389 | -0,762180996 |
| A_19_P00326178 | NM_033109       | PNPT1        | polyribonucleotide nucleotidyltransferase 1                                         |                 | -0,762197243 |
| A_23_P120822   | NM_016327       | UPB1         | ureidopropionase, beta                                                              | ENST00000326010 | -0,762523726 |
| A_21_P0005166  | TCONS_00012732  | XLOC_005737  |                                                                                     |                 | -0,7625841   |
| A_24_P942604   | NM_006306       | SMC1A        | structural maintenance of chromosomes 1A                                            | ENST00000322213 | -0,76260396  |
| A_21_P0012594  | NR_038303       | LOC100505702 | uncharacterized LOC100505702                                                        |                 | -0,762708672 |
| A_24_P131066   | NM_004258       | CD101        | CD101 molecule                                                                      | ENST00000369470 | -0,762890989 |
| A_33_P3272390  | NM_006267       | RANBP2       | RAN binding protein 2                                                               | ENST00000283195 | -0,763133855 |
| A_24_P158089   | NM_000602       | SERPINE1     | serpin peptidase inhibitor, clade E (nexin, plasminogen activator inhibitor type 1) | ENST00000445463 | -0,763213923 |
| A_23_P52647    | NM_006795       | EHD1         | EH-domain containing 1                                                              | ENST00000359393 | -0,76345467  |
| A_21_P0014031  | NM_001123066    | MAPT         | microtubule-associated protein tau                                                  | ENST00000354326 | -0,76381179  |
| A_23_P120822   | NM_016327       | UPB1         | ureidopropionase, beta                                                              | ENST00000326010 | -0,763831982 |

|               |                  |                |                                                                         |  |                 |              |
|---------------|------------------|----------------|-------------------------------------------------------------------------|--|-----------------|--------------|
| A_21_P0001688 | TCONS_00002073   | XLOC_000264    |                                                                         |  |                 | -0,763860917 |
| A_33_P3286739 | ENST00000343281  | N4BP2L1        | NEDD4 binding protein 2-like 1                                          |  | ENST00000343281 | -0,764016478 |
| A_33_P3226080 | NM_207103        | C17orf87       | chromosome 17 open reading frame 87                                     |  | ENST00000399600 | -0,764148269 |
| A_33_P3373459 | NM_018641        | CHST12         | carbohydrate (chondroitin 4) sulfotransferase 12                        |  | ENST00000258711 | -0,764323004 |
| A_21_P0013701 | AK095210         | XLOC_I2_014850 |                                                                         |  |                 | -0,7644595   |
| A_23_P25566   | NM_004951        | GPR183         | G protein-coupled receptor 183                                          |  | ENST00000376414 | -0,764543042 |
| A_23_P113777  | NM_004791        | ITGBL1         | integrin, beta-like 1 (with EGF-like repeat domains)                    |  | ENST00000376162 | -0,764703558 |
| A_23_P42909   | NM_153345        | TMEM139        | transmembrane protein 139                                               |  | ENST00000409244 | -0,764753061 |
| A_23_P438     | NM_017773        | LAX1           | lymphocyte transmembrane adaptor 1                                      |  | ENST00000442561 | -0,764760478 |
| A_23_P113471  | NM_174912        | FAAH2          | fatty acid amide hydrolase 2                                            |  | ENST00000491179 | -0,764848074 |
| A_23_P120822  | NM_016327        | UPB1           | ureidopropionase, beta                                                  |  | ENST00000326010 | -0,765061097 |
| A_23_P140384  | NM_001911        | CTSG           | cathepsin G                                                             |  | ENST00000216336 | -0,765196222 |
| A_23_P212655  | NM_130446        | KLHL6          | kelch-like 6 (Drosophila)                                               |  | ENST00000468734 | -0,765399012 |
| A_23_P106973  | NM_006640        | Sep-09         | septin 9                                                                |  | ENST00000329047 | -0,765493666 |
| A_23_P71530   | NM_002546        | TNFRSF11B      | tumor necrosis factor receptor superfamily, member 11b                  |  | ENST00000521597 | -0,765848245 |
| A_24_P132624  | NM_018376        | NIPSNAP3B      | nipsnap homolog 3B (C. elegans)                                         |  | ENST00000461177 | -0,766152463 |
| A_33_P3610406 | NR_028501        | ECEL1P2        | endothelin converting enzyme-like 1, pseudogene 2                       |  | ENST00000461596 | -0,766407974 |
| A_23_P106973  | NM_006640        | Sep-09         | septin 9                                                                |  | ENST00000329047 | -0,766577685 |
| A_23_P26771   | NM_006678        | CD300C         | CD300c molecule                                                         |  | ENST00000330793 | -0,766760733 |
| A_33_P3264846 | NM_152703        | SAMD9L         | sterile alpha motif domain containing 9-like                            |  | ENST00000394472 | -0,76676549  |
| A_24_P252945  | NM_032966        | CXCR5          | chemokine (C-X-C motif) receptor 5                                      |  | ENST00000292174 | -0,766998341 |
| A_23_P23947   | NM_005204        | MAP3K8         | mitogen-activated protein kinase kinase kinase 8                        |  | ENST00000263056 | -0,767277769 |
| A_24_P344516  | NR_003578        | ZNF702P        | zinc finger protein 702, pseudogene                                     |  | ENST00000270443 | -0,767517461 |
| A_23_P11201   | NM_001097579     | GPR34          | G protein-coupled receptor 34                                           |  | ENST00000535368 | -0,767539408 |
| A_21_P0011017 | TCONS_I2_0000518 | XLOC_I2_002767 |                                                                         |  |                 | -0,767756897 |
| A_23_P100386  | NM_152456        | IL34           | interleukin 34                                                          |  | ENST00000429149 | -0,767798926 |
| A_33_P3253394 | NM_002287        | LAIR1          | leukocyte-associated immunoglobulin-like receptor 1                     |  |                 | -0,767924822 |
| A_32_P117354  | NM_014988        | LIMCH1         | LIM and calponin homology domains 1                                     |  | ENST00000512946 | -0,768631604 |
| A_21_P0004271 | ENST00000508366  | ATP6AP1L       | ATPase, H <sup>+</sup> transporting, lysosomal accessory protein 1-like |  | ENST00000508366 | -0,768884387 |



|                |              |              |                                                                                     |                 |              |
|----------------|--------------|--------------|-------------------------------------------------------------------------------------|-----------------|--------------|
| A_23_P16953    | NM_000867    | HTR2B        | 5-hydroxytryptamine (serotonin) receptor 2B                                         | ENST00000540289 | -0,768924311 |
| A_24_P158089   | NM_000602    | SERPINE1     | serpin peptidase inhibitor, clade E (nexin, plasminogen activator inhibitor type 1) | ENST00000445463 | -0,769670482 |
| A_24_P192262   | NM_005402    | RALA         | v-ral simian leukemia viral oncogene homolog A (ras related)                        | ENST00000005257 | -0,770321547 |
| A_33_P3262575  | NM_018842    | BAIAP2L1     | BAI1-associated protein 2-like 1                                                    | ENST00000005260 | -0,770923461 |
| A_32_P456318   | NM_080743    | SRSF12       | serine/arginine-rich splicing factor 12                                             | ENST00000452027 | -0,771098064 |
| A_33_P3309289  | AK021929     | ST3GAL4      | ST3 beta-galactoside alpha-2,3-sialyltransferase 4                                  |                 | -0,771222374 |
| A_24_P158089   | NM_000602    | SERPINE1     | serpin peptidase inhibitor, clade E (nexin, plasminogen activator inhibitor type 1) | ENST00000445463 | -0,77146789  |
| A_33_P3424067  | NM_017635    | SUV420H1     | suppressor of variegation 4-20 homolog 1 (Drosophila)                               | ENST00000304363 | -0,771722092 |
| A_23_P11201    | NM_001097579 | GPR34        | G protein-coupled receptor 34                                                       | ENST00000535368 | -0,771873361 |
| A_23_P112061   | NM_152419    | HGSNAT       | heparan-alpha-glucosaminide N-acetyltransferase                                     | ENST00000458501 | -0,771961694 |
| A_23_P113471   | NM_174912    | FAAH2        | fatty acid amide hydrolase 2                                                        | ENST00000491179 | -0,772071137 |
| A_32_P59010    | NM_207381    | TNFAIP8L3    | tumor necrosis factor, alpha-induced protein 8-like 3                               | ENST00000327536 | -0,772216673 |
| A_23_P112061   | NM_152419    | HGSNAT       | heparan-alpha-glucosaminide N-acetyltransferase                                     | ENST00000458501 | -0,772322786 |
| A_19_P00801649 | XR_132670    | LOC100652730 | uncharacterized LOC100652730                                                        | ENST00000412500 | -0,772506531 |
| A_23_P109913   | NM_006564    | CXCR6        | chemokine (C-X-C motif) receptor 6                                                  | ENST00000438735 | -0,772614018 |
| A_21_P0005189  | XR_108720    | LOC100507642 | uncharacterized LOC100507642                                                        |                 | -0,772628721 |
| A_23_P379475   | NM_014762    | DHCR24       | 24-dehydrocholesterol reductase                                                     | ENST00000371269 | -0,772976733 |
| A_24_P319647   | NM_030764    | FCRL2        | Fc receptor-like 2                                                                  | ENST00000392274 | -0,773358218 |
| A_24_P784765   | NM_203330    | CD59         | CD59 molecule, complement regulatory protein                                        |                 | -0,774094437 |
| A_23_P70007    | NM_012484    | HMMR         | hyaluronan-mediated motility receptor (RHAMM)                                       | ENST00000393915 | -0,77417298  |
| A_23_P104438   | NM_032578    | MYPN         | myopalladin                                                                         | ENST00000354393 | -0,774305639 |
| A_33_P3412900  | NM_001039771 | CBLN3        | cerebellin 3 precursor                                                              | ENST00000267406 | -0,77438706  |
| A_23_P110212   | NM_001995    | ACSL1        | acyl-CoA synthetase long-chain family member 1                                      | ENST00000281455 | -0,774647393 |
| A_33_P3345210  | NM_001164407 | TLCD2        | TLC domain containing 2                                                             | ENST00000330676 | -0,774819228 |
| A_23_P104438   | NM_032578    | MYPN         | myopalladin                                                                         | ENST00000354393 | -0,774875741 |
| A_23_P121480   | NM_001004196 | CD200        | CD200 molecule                                                                      | ENST00000478595 | -0,775349907 |
| A_23_P120467   | NM_199427    | ZFP64        | zinc finger protein 64 homolog (mouse)                                              | ENST00000361387 | -0,775478061 |
| A_23_P106973   | NM_006640    | Sep-09       | septin 9                                                                            | ENST00000329047 | -0,775619708 |
| A_23_P95790    | NM_017625    | ITLN1        | intelectin 1 (galactofuranose binding)                                              | ENST00000326245 | -0,775711403 |

|                |                 |                |                                                              |                 |              |
|----------------|-----------------|----------------|--------------------------------------------------------------|-----------------|--------------|
| A_19_P00809708 | NR_027046       | LOC145474      | uncharacterized LOC145474                                    |                 | -0,775883881 |
| A_23_P106973   | NM_006640       | Sep-09         | septin 9                                                     | ENST00000329047 | -0,776135396 |
| A_21_P0013122  | BC039678        | XLOC_I2_012378 |                                                              |                 | -0,776220212 |
| A_24_P18146    | NM_015310       | PSD3           | pleckstrin and Sec7 domain containing 3                      | ENST00000286485 | -0,776240005 |
| A_23_P105862   | NM_023037       | FRY            | furry homolog (Drosophila)                                   | ENST00000380257 | -0,776479272 |
| A_33_P3296181  | NM_001001437    | CCL3L3         | chemokine (C-C motif) ligand 3-like 3                        | ENST00000394484 | -0,777133252 |
| A_24_P188447   | NM_021952       | ELAVL4         | ELAV (embryonic lethal, abnormal vision, Drosophila)-like 4  | ENST00000357083 | -0,777169058 |
| A_33_P3367301  | NM_152219       | GJD3           | gap junction protein, delta 3, 31.9kDa                       |                 | -0,777267276 |
| A_23_P18684    | NM_004362       | CLGN           | calmegin                                                     | ENST00000545667 | -0,777294715 |
| A_23_P112061   | NM_152419       | HGSNAT         | heparan-alpha-glucosaminide N-acetyltransferase              | ENST00000458501 | -0,777369838 |
| A_23_P116512   | NM_024841       | PRR5L          | proline rich 5 like                                          | ENST00000389693 | -0,777395995 |
| A_23_P106973   | NM_006640       | Sep-09         | septin 9                                                     | ENST00000329047 | -0,777579267 |
| A_23_P103486   | NM_000775       | CYP2J2         | cytochrome P450, family 2, subfamily J, polypeptide 2        | ENST00000469406 | -0,777801929 |
| A_33_P3241681  | NM_003948       | CDKL2          | cyclin-dependent kinase-like 2 (CDC2-related kinase)         |                 | -0,77793912  |
| A_32_P108254   | NM_017565       | FAM20A         | family with sequence similarity 20, member A                 | ENST00000375556 | -0,778133922 |
| A_23_P112554   | NM_001855       | COL15A1        | collagen, type XV, alpha 1                                   | ENST00000375001 | -0,778283247 |
| A_23_P106973   | NM_006640       | Sep-09         | septin 9                                                     | ENST00000329047 | -0,778846365 |
| A_23_P106973   | NM_006640       | Sep-09         | septin 9                                                     | ENST00000329047 | -0,778901075 |
| A_23_P116512   | NM_024841       | PRR5L          | proline rich 5 like                                          | ENST00000389693 | -0,778946654 |
| A_24_P945113   | NM_000020       | ACVRL1         | activin A receptor type II-like 1                            | ENST00000550683 | -0,779021218 |
| A_33_P3326767  | XR_110123       | LOC100129597   | uncharacterized LOC100129597                                 |                 | -0,779086731 |
| A_23_P99360    | NM_213590       | TRIM13         | tripartite motif containing 13                               | ENST00000378182 | -0,779874451 |
| A_23_P110212   | NM_001995       | ACSL1          | acyl-CoA synthetase long-chain family member 1               | ENST00000281455 | -0,77994692  |
| A_23_P329261   | NM_000891       | KCNJ2          | potassium inwardly-rectifying channel, subfamily J, member 2 | ENST00000243457 | -0,780163367 |
| A_19_P00809368 | THC2631297      | XLOC_002749    |                                                              |                 | -0,780383437 |
| A_33_P3281567  | NR_002174       | CMAHP          | cytidine monophospho-N-acetylneuraminic acid hydroxylase     | ENST00000490939 | -0,780446498 |
| A_24_P937306   | ENST00000380291 | AP1S2          | adaptor-related protein complex 1, sigma 2 subunit           | ENST00000380291 | -0,780902061 |
| A_33_P3240787  | XR_108893       | LOC100131910   | uncharacterized LOC100131910                                 |                 | -0,781064273 |
| A_24_P206343   | NM_033054       | MYO1G          | myosin IG                                                    | ENST00000488554 | -0,781138964 |

|                |              |              |                                                      |                 |              |
|----------------|--------------|--------------|------------------------------------------------------|-----------------|--------------|
| A_33_P3313810  | NM_001971    | CELA1        | chymotrypsin-like elastase family, member 1          | ENST00000293636 | -0,781545214 |
| A_23_P65983    | NM_033212    | CCDC102A     | coiled-coil domain containing 102A                   | ENST00000258214 | -0,781663876 |
| A_23_P129717   | NM_080663    | ERI2         | ERI1 exoribonuclease family member 2                 | ENST00000300005 | -0,781728213 |
| A_23_P110212   | NM_001995    | ACSL1        | acyl-CoA synthetase long-chain family member 1       | ENST00000281455 | -0,781743024 |
| A_24_P276576   | NM_032738    | FCRLA        | Fc receptor-like A                                   | ENST00000367950 | -0,782271577 |
| A_24_P68908    | NR_033752    | LOC344887    | NmrA-like family domain containing 1 pseudogene      | ENST00000423298 | -0,782397205 |
| A_23_P62642    | NM_012337    | CCDC19       | coiled-coil domain containing 19                     | ENST00000475911 | -0,78240245  |
| A_23_P113777   | NM_004791    | ITGBL1       | integrin, beta-like 1 (with EGF-like repeat domains) | ENST00000376162 | -0,78258065  |
| A_33_P3251796  | NM_014317    | PDSS1        | prenyl (decaprenyl) diphosphate synthase, subunit 1  | ENST00000396343 | -0,782703025 |
| A_21_P0011496  | NM_001025195 | CES1         | carboxylesterase 1                                   | ENST00000360526 | -0,782713261 |
| A_23_P206920   | NM_001040114 | MYH11        | myosin, heavy chain 11, smooth muscle                | ENST00000396324 | -0,783275317 |
| A_24_P396167   | NM_001335    | CTSW         | cathepsin W                                          | ENST00000307886 | -0,78327825  |
| A_23_P106973   | NM_006640    | Sep-09       | septin 9                                             | ENST00000329047 | -0,783398753 |
| A_23_P126735   | NM_000572    | IL10         | interleukin 10                                       | ENST00000423557 | -0,783426647 |
| A_23_P67042    | NM_017947    | MOCOS        | molybdenum cofactor sulfurase                        | ENST00000261326 | -0,78363676  |
| A_23_P110212   | NM_001995    | ACSL1        | acyl-CoA synthetase long-chain family member 1       | ENST00000281455 | -0,783750434 |
| A_33_P3293202  | NM_177965    | C8orf37      | chromosome 8 open reading frame 37                   | ENST00000286688 | -0,784000354 |
| A_24_P215765   | NM_024490    | ATP10A       | ATPase, class V, type 10A                            | ENST00000555815 | -0,78405118  |
| A_19_P00322655 | NR_036444    | LOC400550    | uncharacterized LOC400550                            |                 | -0,784221141 |
| A_23_P106973   | NM_006640    | Sep-09       | septin 9                                             | ENST00000329047 | -0,78445318  |
| A_23_P104438   | NM_032578    | MYPN         | myopalladin                                          | ENST00000354393 | -0,784502636 |
| A_23_P29723    | NM_001012410 | SGOL1        | shugoshin-like 1 (S. pombe)                          | ENST00000383774 | -0,784884602 |
| A_23_P106973   | NM_006640    | Sep-09       | septin 9                                             | ENST00000329047 | -0,785076798 |
| A_23_P113777   | NM_004791    | ITGBL1       | integrin, beta-like 1 (with EGF-like repeat domains) | ENST00000376162 | -0,785369146 |
| A_23_P110212   | NM_001995    | ACSL1        | acyl-CoA synthetase long-chain family member 1       | ENST00000281455 | -0,785497376 |
| A_23_P38795    | NM_002029    | FPR1         | formyl peptide receptor 1                            | ENST00000304748 | -0,785660783 |
| A_19_P00317953 | XR_111691    | LOC100508196 | uncharacterized LOC100508196                         |                 | -0,785945604 |
| A_23_P113471   | NM_174912    | FAAH2        | fatty acid amide hydrolase 2                         | ENST00000491179 | -0,785963616 |
| A_24_P71904    | NM_000860    | HPGD         | hydroxyprostaglandin dehydrogenase 15-(NAD)          | ENST00000296522 | -0,786188059 |

|               |                 |                |                                                                                     |                 |              |
|---------------|-----------------|----------------|-------------------------------------------------------------------------------------|-----------------|--------------|
| A_32_P213330  | NM_001177693    | RGNEF          | 190 kDa guanine nucleotide exchange factor                                          | ENST00000296794 | -0,786215019 |
| A_23_P126735  | NM_000572       | IL10           | interleukin 10                                                                      | ENST00000423557 | -0,786750048 |
| A_21_P0013512 | THC2568453      | XLOC_I2_014504 |                                                                                     |                 | -0,786825327 |
| A_23_P110212  | NM_001995       | ACSL1          | acyl-CoA synthetase long-chain family member 1                                      | ENST00000281455 | -0,787122658 |
| A_21_P0006566 | THC2649084      | XLOC_008033    |                                                                                     |                 | -0,787474068 |
| A_21_P0008074 | TCONS_00021814  | XLOC_010415    |                                                                                     |                 | -0,787723657 |
| A_33_P3318606 | BC034544        | SHC2           | SHC (Src homology 2 domain containing) transforming protein 2                       |                 | -0,788766896 |
| A_33_P3337931 | ENST00000529945 | PDE4DIP        | phosphodiesterase 4D interacting protein                                            | ENST00000529945 | -0,789112102 |
| A_23_P340848  | NM_000960       | PTGIR          | prostaglandin I2 (prostacyclin) receptor (IP)                                       | ENST00000291294 | -0,789295166 |
| A_33_P3370449 | NM_152413       | GOT1L1         | glutamic-oxaloacetic transaminase 1-like 1                                          | ENST00000307599 | -0,789392008 |
| A_21_P0006823 | TCONS_00017776  | XLOC_008370    |                                                                                     |                 | -0,789885559 |
| A_23_P17354   | NM_024034       | GDAP1L1        | ganglioside-induced differentiation-associated protein 1-like                       | ENST00000438466 | -0,790037691 |
| A_23_P119478  | NM_005755       | EBI3           | Epstein-Barr virus induced 3                                                        | ENST00000221847 | -0,790249661 |
| A_21_P0014461 | XR_109940       | LOC100506934   | uncharacterized LOC100506934                                                        |                 | -0,790351008 |
| A_23_P145863  | NM_005620       | S100A11        | S100 calcium binding protein A11                                                    | ENST00000271638 | -0,790526962 |
| A_23_P110212  | NM_001995       | ACSL1          | acyl-CoA synthetase long-chain family member 1                                      | ENST00000281455 | -0,790792813 |
| A_24_P33895   | NM_001040619    | ATF3           | activating transcription factor 3                                                   | ENST00000366983 | -0,791425288 |
| A_23_P38468   | NM_014604       | TAX1BP3        | Tax1 (human T-cell leukemia virus type I) binding protein 3                         | ENST00000550383 | -0,791485186 |
| A_21_P0008150 | THC2651391      | XLOC_010585    |                                                                                     |                 | -0,791493003 |
| A_23_P1331    | NM_080801       | COL13A1        | collagen, type XIII, alpha 1                                                        | ENST00000478219 | -0,791702024 |
| A_33_P3342126 | NM_020226       | PRDM8          | PR domain containing 8                                                              | ENST00000415738 | -0,792360468 |
| A_23_P421401  | NM_002609       | PDGFRB         | platelet-derived growth factor receptor, beta polypeptide                           | ENST00000544453 | -0,792578273 |
| A_23_P119478  | NM_005755       | EBI3           | Epstein-Barr virus induced 3                                                        | ENST00000221847 | -0,792830987 |
| A_24_P158089  | NM_000602       | SERPINE1       | serpin peptidase inhibitor, clade E (nexin, plasminogen activator inhibitor type 1) | ENST00000445463 | -0,792945544 |
| A_33_P3232552 | NM_000857       | GUCY1B3        | guanylate cyclase 1, soluble, beta 3                                                | ENST00000264424 | -0,793044472 |
| A_32_P131031  | NM_182762       | MACC1          | metastasis associated in colon cancer 1                                             | ENST00000332878 | -0,793274977 |
| A_23_P6381    | NM_002430       | MN1            | meningioma (disrupted in balanced translocation) 1                                  | ENST00000302326 | -0,79330873  |
| A_23_P304682  | NM_001424       | EMP2           | epithelial membrane protein 2                                                       | ENST00000359543 | -0,793405775 |
| A_33_P3415032 | NM_002232       | KCNA3          | potassium voltage-gated channel, shaker-related subfamily, member 3                 | ENST00000369769 | -0,793430819 |

|                |                |             |                                                                |                 |              |
|----------------|----------------|-------------|----------------------------------------------------------------|-----------------|--------------|
| A_19_P00317023 | AK129745       | Q6IHG2      |                                                                |                 | -0,793636606 |
| A_21_P0010978  | AF001893       | NEAT1       | nuclear paraspeckle assembly transcript 1 (non-protein coding) |                 | -0,793804988 |
| A_24_P158089   | NM_000602      | SERPINE1    | serpin peptidase inhibitor, clade E (nexin, plasminogen activ  | ENST00000445463 | -0,793911379 |
| A_23_P215070   | NM_018718      | CEP41       | centrosomal protein 41kDa                                      | ENST00000223208 | -0,79396081  |
| A_33_P3228305  | NM_015071      | ARHGAP26    | Rho GTPase activating protein 26                               | ENST00000378004 | -0,79455662  |
| A_23_P110212   | NM_001995      | ACSL1       | acyl-CoA synthetase long-chain family member 1                 | ENST00000281455 | -0,794679283 |
| A_32_P162374   | NM_173529      | C18orf54    | chromosome 18 open reading frame 54                            | ENST00000300091 | -0,795400514 |
| A_23_P116512   | NM_024841      | PRR5L       | proline rich 5 like                                            | ENST00000389693 | -0,796039903 |
| A_33_P3223002  | NM_018485      | GPR77       | G protein-coupled receptor 77                                  | ENST00000257267 | -0,796078118 |
| A_23_P203376   | NM_152852      | MS4A6A      | membrane-spanning 4-domains, subfamily A, member 6A            | ENST00000323961 | -0,796303388 |
| A_24_P37409    | NM_004418      | DUSP2       | dual specificity phosphatase 2                                 | ENST00000488952 | -0,796890809 |
| A_23_P369815   | NM_000639      | FASLG       | Fas ligand (TNF superfamily, member 6)                         | ENST00000367721 | -0,796901286 |
| A_23_P103511   | NM_001085375   | C1orf226    | chromosome 1 open reading frame 226                            | ENST00000458626 | -0,797583152 |
| A_33_P3212109  | NM_016356      | DCDC2       | doublecortin domain containing 2                               | ENST00000378450 | -0,797801282 |
| A_23_P112061   | NM_152419      | HGSNAT      | heparan-alpha-glucosaminide N-acetyltransferase                | ENST00000458501 | -0,798246913 |
| A_21_P0003040  | TCONS_00006262 | XLOC_002865 |                                                                |                 | -0,798621236 |
| A_23_P208293   | NM_001042724   | PVRL2       | poliovirus receptor-related 2 (herpesvirus entry mediator B    | ENST00000252483 | -0,799302402 |
| A_23_P37410    | NM_031226      | CYP19A1     | cytochrome P450, family 19, subfamily A, polypeptide 1         | ENST00000541721 | -0,799724908 |
| A_23_P91390    | NM_000361      | THBD        | thrombomodulin                                                 | ENST00000503590 | -0,799856071 |
| A_23_P119478   | NM_005755      | EBI3        | Epstein-Barr virus induced 3                                   | ENST00000221847 | -0,800076308 |
| A_24_P117029   | NM_000527      | LDLR        | low density lipoprotein receptor                               | ENST00000252444 | -0,800372942 |
| A_23_P152406   | NM_032330      | CAPNS2      | calpain, small subunit 2                                       | ENST00000457326 | -0,800567142 |
| A_23_P126735   | NM_000572      | IL10        | interleukin 10                                                 | ENST00000423557 | -0,800745736 |
| A_32_P18440    | NM_032199      | ARID5B      | AT rich interactive domain 5B (MRF1-like)                      | ENST00000279873 | -0,800748694 |
| A_23_P151368   | NM_174928      | N6AMT2      | N-6 adenine-specific DNA methyltransferase 2 (putative)        | ENST00000382754 | -0,800837122 |
| A_33_P3379268  | NM_207103      | C17orf87    | chromosome 17 open reading frame 87                            | ENST00000399592 | -0,801076017 |
| A_33_P3226832  | NM_001993      | F3          | coagulation factor III (thromboplastin, tissue factor)         | ENST00000370207 | -0,801109623 |
| A_23_P126735   | NM_000572      | IL10        | interleukin 10                                                 | ENST00000423557 | -0,801219763 |
| A_21_P0010222  | TCONS_00028969 | XLOC_013866 |                                                                |                 | -0,801338512 |



|                |                                 |              |                                                              |                 |              |
|----------------|---------------------------------|--------------|--------------------------------------------------------------|-----------------|--------------|
| A_23_P34915    | NM_001040619                    | ATF3         | activating transcription factor 3                            | ENST00000366987 | -0,801356302 |
| A_33_P3423941  | NM_003641                       | IFITM1       | interferon induced transmembrane protein 1 (9-27)            | ENST00000408968 | -0,801499971 |
| A_23_P112061   | NM_152419                       | HGSNAT       | heparan-alpha-glucosaminide N-acetyltransferase              | ENST00000458501 | -0,802101524 |
| A_23_P425304   | NM_016169                       | SUFU         | suppressor of fused homolog (Drosophila)                     | ENST00000369902 | -0,802265102 |
| A_23_P4714     | NM_006533                       | MIA          | melanoma inhibitory activity                                 | ENST00000263369 | -0,802796803 |
| A_21_P0004779  | ENST00000417932                 | XLOC_005851  |                                                              | ENST00000417932 | -0,803051446 |
| A_23_P119478   | NM_005755                       | EBI3         | Epstein-Barr virus induced 3                                 | ENST00000221847 | -0,80367941  |
| A_33_P3351371  | NM_031226                       | CYP19A1      | cytochrome P450, family 19, subfamily A, polypeptide 1       | ENST00000405011 | -0,803757943 |
| A_23_P119478   | NM_005755                       | EBI3         | Epstein-Barr virus induced 3                                 | ENST00000221847 | -0,803778477 |
| A_23_P46871    | NM_018344                       | SLC29A3      | solute carrier family 29 (nucleoside transporters), member 3 | ENST00000373189 | -0,804090063 |
| A_21_P0012671  | TCONS_I2_0002119;XLOC_I2_011173 |              |                                                              |                 | -0,804114381 |
| A_23_P42257    | NM_003897                       | IER3         | immediate early response 3                                   | ENST00000376382 | -0,804603441 |
| A_23_P126735   | NM_000572                       | IL10         | interleukin 10                                               | ENST00000423557 | -0,804697131 |
| A_23_P10232    | NM_017935                       | BANK1        | B-cell scaffold protein with ankyrin repeats 1               | ENST00000322953 | -0,804976189 |
| A_23_P120822   | NM_016327                       | UPB1         | ureidopropionase, beta                                       | ENST00000326010 | -0,805138861 |
| A_23_P422732   | NM_145172                       | WDR63        | WD repeat domain 63                                          | ENST00000294664 | -0,805292936 |
| A_23_P68031    | NM_003151                       | STAT4        | signal transducer and activator of transcription 4           | ENST00000392320 | -0,805524283 |
| A_23_P110212   | NM_001995                       | ACSL1        | acyl-CoA synthetase long-chain family member 1               | ENST00000281455 | -0,80605121  |
| A_19_P00806771 | XR_132670                       | LOC100652730 | uncharacterized LOC100652730                                 | ENST00000412500 | -0,80630995  |
| A_32_P87013    | NM_000584                       | IL8          | interleukin 8                                                | ENST00000307407 | -0,806703227 |
| A_21_P0000893  | NR_040051                       | LOC100506686 | uncharacterized LOC100506686                                 |                 | -0,806859805 |
| A_23_P36641    | NM_020661                       | AICDA        | activation-induced cytidine deaminase                        | ENST00000229335 | -0,807411618 |
| A_33_P3630129  | AK128708                        | FLJ46875     | uncharacterized LOC440918                                    |                 | -0,807470942 |
| A_23_P11201    | NM_001097579                    | GPR34        | G protein-coupled receptor 34                                | ENST00000535368 | -0,80767148  |
| A_33_P3392580  | NM_013411                       | AK2          | adenylate kinase 2                                           | ENST00000373449 | -0,807733748 |
| A_24_P46130    | NM_001099                       | ACPP         | acid phosphatase, prostate                                   | ENST00000336375 | -0,808075627 |
| A_23_P119478   | NM_005755                       | EBI3         | Epstein-Barr virus induced 3                                 | ENST00000221847 | -0,808166763 |
| A_23_P66432    | NM_032646                       | TTYH2        | tweety homolog 2 (Drosophila)                                | ENST00000441391 | -0,808232765 |
| A_23_P403335   | NM_015065                       | EXPH5        | exophilin 5                                                  | ENST00000525344 | -0,808321932 |

|                |                 |                |                                                               |                 |              |
|----------------|-----------------|----------------|---------------------------------------------------------------|-----------------|--------------|
| A_33_P3239347  | NM_006167       | NKX3-1         | NK3 homeobox 1                                                | ENST00000380871 | -0,808401767 |
| A_21_P0000173  | NR_045116       | C5orf56        | chromosome 5 open reading frame 56                            | ENST00000464024 | -0,80860278  |
| A_23_P90804    | NM_145686       | MAP4K4         | mitogen-activated protein kinase kinase kinase kinase 4       | ENST00000414004 | -0,809024378 |
| A_33_P3212804  | NM_001010859    | C22orf42       | chromosome 22 open reading frame 42                           | ENST00000467813 | -0,809547123 |
| A_23_P256956   | NM_005733       | KIF20A         | kinesin family member 20A                                     | ENST00000502338 | -0,809785931 |
| A_23_P78037    | NM_006273       | CCL7           | chemokine (C-C motif) ligand 7                                | ENST00000394627 | -0,810229924 |
| A_21_P0009342  | NR_030732       | LOC645638      | WDMN1-like pseudogene                                         |                 | -0,810252566 |
| A_23_P103511   | NM_001085375    | C1orf226       | chromosome 1 open reading frame 226                           | ENST00000458626 | -0,810365868 |
| A_33_P3367251  | NM_001114395    | CNTLN          | centlein, centrosomal protein                                 |                 | -0,810535235 |
| A_23_P359277   | NM_024930       | ELOVL7         | ELOVL fatty acid elongase 7                                   | ENST00000438340 | -0,811011753 |
| A_21_P0004966  | TCONS_00012009  | XLOC_005524    |                                                               |                 | -0,811088096 |
| A_33_P3393766  | NM_001130677    | C17orf96       | chromosome 17 open reading frame 96                           | ENST00000325814 | -0,811843026 |
| A_23_P119478   | NM_005755       | EBI3           | Epstein-Barr virus induced 3                                  | ENST00000221847 | -0,812641385 |
| A_23_P112061   | NM_152419       | HGSNAT         | heparan-alpha-glucosaminide N-acetyltransferase               | ENST00000458501 | -0,812945396 |
| A_23_P206359   | NM_004360       | CDH1           | cadherin 1, type 1, E-cadherin (epithelial)                   | ENST00000261769 | -0,81311719  |
| A_21_P0011346  | BG107090        | XLOC_I2_004840 |                                                               |                 | -0,813238179 |
| A_23_P110212   | NM_001995       | ACSL1          | acyl-CoA synthetase long-chain family member 1                | ENST00000281455 | -0,813582926 |
| A_23_P145874   | NM_152703       | SAMD9L         | sterile alpha motif domain containing 9-like                  | ENST00000411955 | -0,813620386 |
| A_24_P197964   | NM_014788       | TRIM14         | tripartite motif containing 14                                | ENST00000341469 | -0,813672406 |
| A_23_P407096   | NM_152625       | ZNF366         | zinc finger protein 366                                       | ENST00000318442 | -0,813776795 |
| A_23_P335452   | NM_153367       | ZCCHC24        | zinc finger, CCHC domain containing 24                        | ENST00000372336 | -0,814316219 |
| A_23_P119478   | NM_005755       | EBI3           | Epstein-Barr virus induced 3                                  | ENST00000221847 | -0,814351305 |
| A_33_P3375934  | NM_005746       | NAMPT          | nicotinamide phosphoribosyltransferase                        | ENST00000222553 | -0,815279677 |
| A_24_P402588   | NM_018014       | BCL11A         | B-cell CLL/lymphoma 11A (zinc finger protein)                 | ENST00000489516 | -0,816239481 |
| A_21_P0000778  | NR_038357       | LOC100507331   | uncharacterized LOC100507331                                  | ENST00000456638 | -0,81648049  |
| A_24_P158089   | NM_000602       | SERPINE1       | serpin peptidase inhibitor, clade E (nexin, plasminogen activ | ENST00000445463 | -0,816545125 |
| A_23_P126735   | NM_000572       | IL10           | interleukin 10                                                | ENST00000423557 | -0,816878192 |
| A_19_P00315518 | ENST00000427157 | XLOC_005810    |                                                               | ENST00000427157 | -0,816945984 |
| A_33_P3413558  | NM_006566       | CD226          | CD226 molecule                                                | ENST00000280200 | -0,817448327 |

|               |                 |              |                                                 |                 |              |
|---------------|-----------------|--------------|-------------------------------------------------|-----------------|--------------|
| A_23_P105862  | NM_023037       | FRY          | furry homolog (Drosophila)                      | ENST00000380257 | -0,817615103 |
| A_24_P111242  | NM_148893       | SVIP         | small VCP/p97-interacting protein               | ENST00000354193 | -0,817644967 |
| A_23_P96658   | NR_045128       | TXLNG2P      | taxilin gamma 2, pseudogene                     | ENST00000382832 | -0,818427522 |
| A_23_P163697  | NM_016524       | SYT17        | synaptotagmin XVII                              | ENST00000355377 | -0,818576991 |
| A_23_P116829  | NM_003348       | UBE2N        | ubiquitin-conjugating enzyme E2N                | ENST00000318066 | -0,818741449 |
| A_21_P0014444 | XR_109837       | LOC100507639 | uncharacterized LOC100507639                    |                 | -0,819512295 |
| A_23_P126735  | NM_000572       | IL10         | interleukin 10                                  | ENST00000423557 | -0,819665804 |
| A_23_P42322   | NM_080680       | COL11A2      | collagen, type XI, alpha 2                      | ENST00000548637 | -0,819690561 |
| A_23_P81898   | NM_006398       | UBD          | ubiquitin D                                     | ENST00000355973 | -0,819976046 |
| A_23_P121564  | NM_000857       | GUCY1B3      | guanylate cyclase 1, soluble, beta 3            | ENST00000264424 | -0,820392604 |
| A_21_P0005154 | TCONS_00012648  | XLOC_005589  |                                                 |                 | -0,820438626 |
| A_33_P3214745 | NM_001024680    | FBXO48       | F-box protein 48                                | ENST00000377957 | -0,82081009  |
| A_23_P206359  | NM_004360       | CDH1         | cadherin 1, type 1, E-cadherin (epithelial)     | ENST00000261769 | -0,820979492 |
| A_33_P3565787 | NR_027329       | KIAA1908     | uncharacterized LOC114796                       |                 | -0,821183415 |
| A_21_P0007481 | NR_033878       | LOC387895    | uncharacterized LOC387895                       |                 | -0,821517317 |
| A_23_P126735  | NM_000572       | IL10         | interleukin 10                                  | ENST00000423557 | -0,821947704 |
| A_23_P151294  | NM_000619       | IFNG         | interferon, gamma                               | ENST00000229135 | -0,821962869 |
| A_21_P0006780 | ENST00000455465 | XLOC_008902  |                                                 | ENST00000455465 | -0,822023339 |
| A_21_P0001225 | ENST00000433576 | XLOC_001214  |                                                 | ENST00000433576 | -0,822172497 |
| A_23_P112061  | NM_152419       | HGSNAT       | heparan-alpha-glucosaminide N-acetyltransferase | ENST00000458501 | -0,822219455 |
| A_23_P112061  | NM_152419       | HGSNAT       | heparan-alpha-glucosaminide N-acetyltransferase | ENST00000458501 | -0,823145629 |
| A_21_P0008156 | TCONS_00021991  | XLOC_010591  |                                                 |                 | -0,82316504  |
| A_24_P132383  | NM_175571       | GIMAP8       | GTPase, IMAP family member 8                    | ENST00000307271 | -0,823253342 |
| A_23_P84202   | NM_024515       | WDR25        | WD repeat domain 25                             | ENST00000554998 | -0,82379232  |
| A_23_P137931  | NM_000677       | ADORA3       | adenosine A3 receptor                           | ENST00000241356 | -0,824262362 |
| A_21_P0013590 | XR_108989       | LOC100507540 | uncharacterized LOC100507540                    |                 | -0,824941766 |
| A_23_P112061  | NM_152419       | HGSNAT       | heparan-alpha-glucosaminide N-acetyltransferase | ENST00000458501 | -0,825152982 |
| A_23_P25674   | NM_001823       | CKB          | creatine kinase, brain                          | ENST00000553652 | -0,825572012 |
| A_23_P119478  | NM_005755       | EBI3         | Epstein-Barr virus induced 3                    | ENST00000221847 | -0,826431224 |

|               |                 |                |                                                               |                 |              |
|---------------|-----------------|----------------|---------------------------------------------------------------|-----------------|--------------|
| A_23_P116512  | NM_024841       | PRR5L          | proline rich 5 like                                           | ENST00000389693 | -0,827063762 |
| A_21_P0006016 | ENST00000424682 | XLOC_007390    |                                                               | ENST00000424682 | -0,827107687 |
| A_23_P352266  | NM_000633       | BCL2           | B-cell CLL/lymphoma 2                                         | ENST00000398117 | -0,82715283  |
| A_23_P49539   | NM_001080519    | BAHCC1         | BAH domain and coiled-coil containing 1                       | ENST00000307745 | -0,827402173 |
| A_32_P54553   | ENST00000454608 | USP41          | ubiquitin specific peptidase 41                               | ENST00000454608 | -0,827831777 |
| A_23_P41470   | NM_017631       | DDX60          | DEAD (Asp-Glu-Ala-Asp) box polypeptide 60                     | ENST00000393743 | -0,827894514 |
| A_33_P3376971 | NM_024111       | CHAC1          | ChaC, cation transport regulator homolog 1 (E. coli)          | ENST00000446533 | -0,827970437 |
| A_33_P3376965 | NM_024111       | CHAC1          | ChaC, cation transport regulator homolog 1 (E. coli)          | ENST00000487220 | -0,82831205  |
| A_23_P117852  | NM_014736       | KIAA0101       | KIAA0101                                                      | ENST00000380258 | -0,828337774 |
| A_21_P0012033 | ENST00000416361 | XLOC_I2_007644 |                                                               | ENST00000416361 | -0,829306456 |
| A_33_P3362696 | NM_018157       | RIC8B          | resistance to inhibitors of cholinesterase 8 homolog B (C. el | ENST00000392837 | -0,830379298 |
| A_21_P0000568 | NR_028471       | LOC644649      | apolipoprotein O pseudogene                                   |                 | -0,830649072 |
| A_23_P97141   | NM_002922       | RGS1           | regulator of G-protein signaling 1                            | ENST00000498352 | -0,831166514 |
| A_23_P206359  | NM_004360       | CDH1           | cadherin 1, type 1, E-cadherin (epithelial)                   | ENST00000261769 | -0,831221214 |
| A_23_P369815  | NM_000639       | FASLG          | Fas ligand (TNF superfamily, member 6)                        | ENST00000367721 | -0,831642091 |
| A_23_P68155   | NM_022168       | IFIH1          | interferon induced with helicase C domain 1                   | ENST00000543192 | -0,831926968 |
| A_33_P3299416 | NM_181711       | GRASP          | GRP1 (general receptor for phosphoinositides 1)-associated    | ENST00000293662 | -0,832698366 |
| A_24_P167642  | NM_000161       | GCH1           | GTP cyclohydrolase 1                                          | ENST00000254299 | -0,832998817 |
| A_23_P118     | NM_001439       | EXTL2          | exostoses (multiple)-like 2                                   | ENST00000370114 | -0,833206183 |
| A_33_P3369371 | NM_002084       | GPX3           | glutathione peroxidase 3 (plasma)                             | ENST00000388825 | -0,833221971 |
| A_23_P8981    | NM_000349       | STAR           | steroidogenic acute regulatory protein                        | ENST00000520114 | -0,833355154 |
| A_24_P192301  | NM_006080       | SEMA3A         | sema domain, immunoglobulin domain (Ig), short basic don      | ENST00000265362 | -0,833668229 |
| A_23_P104438  | NM_032578       | MYPN           | myopalladin                                                   | ENST00000354393 | -0,833811981 |
| A_32_P220770  | NR_002812       | HCG26          | HLA complex group 26 (non-protein coding)                     |                 | -0,833947858 |
| A_23_P41487   | NM_015130       | TBC1D9         | TBC1 domain family, member 9 (with GRAM domain)               | ENST00000442267 | -0,834883001 |
| A_24_P406060  | NM_182757       | RNF144B        | ring finger protein 144B                                      | ENST00000259939 | -0,835005885 |
| A_23_P144916  | NM_005110       | GFPT2          | glutamine-fructose-6-phosphate transaminase 2                 | ENST00000253778 | -0,835275923 |
| A_23_P365614  | NM_004557       | NOTCH4         | notch 4                                                       | ENST00000437843 | -0,835604092 |
| A_21_P0009754 | TCONS_00027265  | XLOC_013282    |                                                               |                 | -0,835808856 |

|                |                 |                |                                                               |                 |              |
|----------------|-----------------|----------------|---------------------------------------------------------------|-----------------|--------------|
| A_24_P70183    | NM_001040113    | MYH11          | myosin, heavy chain 11, smooth muscle                         | ENST00000452625 | -0,83589537  |
| A_24_P133905   | NM_005064       | CCL23          | chemokine (C-C motif) ligand 23                               | ENST00000293280 | -0,83599713  |
| A_23_P112061   | NM_152419       | HGSNAT         | heparan-alpha-glucosaminide N-acetyltransferase               | ENST00000458501 | -0,83844066  |
| A_19_P00813192 | ENST00000534659 | XLOC_I2_002761 |                                                               | ENST00000534659 | -0,838573705 |
| A_23_P17663    | NM_002462       | MX1            | myxovirus (influenza virus) resistance 1, interferon-inducibl | ENST00000455164 | -0,83873053  |
| A_24_P158089   | NM_000602       | SERPINE1       | serpin peptidase inhibitor, clade E (nexin, plasminogen activ | ENST00000445463 | -0,839622887 |
| A_23_P206359   | NM_004360       | CDH1           | cadherin 1, type 1, E-cadherin (epithelial)                   | ENST00000261769 | -0,839665855 |
| A_23_P167599   | NM_001034850    | FAM134B        | family with sequence similarity 134, member B                 | ENST00000306320 | -0,840153213 |
| A_33_P3734384  | AK097526        | LOC285957      | uncharacterized LOC285957                                     |                 | -0,84015844  |
| A_33_P3406567  | NM_152866       | MS4A1          | membrane-spanning 4-domains, subfamily A, member 1            | ENST00000389939 | -0,840412169 |
| A_33_P3353941  | NM_005026       | PIK3CD         | phosphoinositide-3-kinase, catalytic, delta polypeptide       | ENST00000361110 | -0,841117594 |
| A_23_P42746    | NM_000265       | NCF1           | neutrophil cytosolic factor 1                                 | ENST00000289473 | -0,841214086 |
| A_23_P113777   | NM_004791       | ITGBL1         | integrin, beta-like 1 (with EGF-like repeat domains)          | ENST00000376162 | -0,84129229  |
| A_33_P3363637  | NM_013314       | BLNK           | B-cell linker                                                 | ENST00000393898 | -0,841675538 |
| A_24_P66027    | NM_004900       | APOBEC3B       | apolipoprotein B mRNA editing enzyme, catalytic polypeptid    | ENST00000335760 | -0,842344314 |
| A_24_P64653    | NM_152637       | METTL7B        | methyltransferase like 7B                                     | ENST00000394252 | -0,842810186 |
| A_23_P145694   | NM_001673       | ASNS           | asparagine synthetase (glutamine-hydrolyzing)                 | ENST00000394308 | -0,84283189  |
| A_21_P0005902  | TCONS_00015165  | XLOC_007211    |                                                               |                 | -0,843029016 |
| A_33_P3286958  | NM_003783       | B3GALT2        | UDP-Gal:betaGlcNAc beta 1,3-galactosyltransferase, polype     | ENST00000367434 | -0,844053096 |
| A_33_P3237150  | NM_001200       | BMP2           | bone morphogenetic protein 2                                  | ENST00000378827 | -0,845952012 |
| A_24_P148717   | NM_001295       | CCR1           | chemokine (C-C motif) receptor 1                              | ENST00000296140 | -0,846055394 |
| A_23_P104438   | NM_032578       | MYPN           | myopalladin                                                   | ENST00000354393 | -0,846170832 |
| A_24_P334718   | NM_181791       | GPR141         | G protein-coupled receptor 141                                | ENST00000334425 | -0,846656708 |
| A_33_P3335865  | NM_001006657    | WDR35          | WD repeat domain 35                                           | ENST00000345530 | -0,846677905 |
| A_23_P103511   | NM_001085375    | C1orf226       | chromosome 1 open reading frame 226                           | ENST00000458626 | -0,847068637 |
| A_21_P0014632  | XR_110833       | LOC100505987   | uncharacterized LOC100505987                                  |                 | -0,847657721 |
| A_23_P103486   | NM_000775       | CYP2J2         | cytochrome P450, family 2, subfamily J, polypeptide 2         | ENST00000469406 | -0,847952786 |
| A_23_P77918    | NM_006041       | HS3ST3B1       | heparan sulfate (glucosamine) 3-O-sulfotransferase 3B1        | ENST00000360954 | -0,848004897 |
| A_32_P222961   | NM_001012968    | SPIN4          | spindlin family, member 4                                     | ENST00000374884 | -0,848086992 |



|               |                   |                |                                                                           |                 |              |
|---------------|-------------------|----------------|---------------------------------------------------------------------------|-----------------|--------------|
| A_23_P55998   | NM_005628         | SLC1A5         | solute carrier family 1 (neutral amino acid transporter), member 15       | ENST00000306894 | -0,848109136 |
| A_33_P3316273 | NM_002983         | CCL3           | chemokine (C-C motif) ligand 3                                            | ENST00000470334 | -0,848145481 |
| A_23_P139500  | NM_030762         | BHLHE41        | basic helix-loop-helix family, member e41                                 | ENST00000242728 | -0,84834599  |
| A_23_P204847  | NM_002298         | LCP1           | lymphocyte cytosolic protein 1 (L-plastin)                                | ENST00000398576 | -0,848722725 |
| A_33_P3241021 | ENST00000416624   | CD69           | CD69 molecule                                                             | ENST00000416624 | -0,849239341 |
| A_23_P112554  | NM_001855         | COL15A1        | collagen, type XV, alpha 1                                                | ENST00000375001 | -0,849817532 |
| A_24_P106357  | NM_139281         | WDR36          | WD repeat domain 36                                                       | ENST00000506538 | -0,850838416 |
| A_24_P349039  | NM_020754         | ARHGAP31       | Rho GTPase activating protein 31                                          | ENST00000264245 | -0,851170631 |
| A_23_P300150  | NM_172387         | NFATC1         | nuclear factor of activated T-cells, cytoplasmic, calcineurin-dependent 1 | ENST00000318065 | -0,851371948 |
| A_21_P0012423 | TCONS_I2_00019073 | XLOC_I2_010056 |                                                                           |                 | -0,851888185 |
| A_24_P396753  | NM_021643         | TRIB2          | tribbles homolog 2 (Drosophila)                                           | ENST00000155926 | -0,852092507 |
| A_21_P0012695 | TCONS_I2_00021387 | XLOC_I2_011350 |                                                                           |                 | -0,852510946 |
| A_23_P76983   | NM_025057         | C14orf45       | chromosome 14 open reading frame 45                                       | ENST00000394009 | -0,853084814 |
| A_23_P119478  | NM_005755         | EBI3           | Epstein-Barr virus induced 3                                              | ENST00000221847 | -0,853292875 |
| A_23_P401709  | NM_152504         | C20orf196      | chromosome 20 open reading frame 196                                      | ENST00000445603 | -0,853344671 |
| A_23_P120822  | NM_016327         | UPB1           | ureidopropionase, beta                                                    | ENST00000326010 | -0,853468464 |
| A_33_P3322999 | NM_001164375      | C10orf105      | chromosome 10 open reading frame 105                                      | ENST00000398786 | -0,854329964 |
| A_23_P121564  | NM_000857         | GUCY1B3        | guanylate cyclase 1, soluble, beta 3                                      | ENST00000264424 | -0,854640727 |
| A_33_P3287108 | NM_207313         | TMEM132E       | transmembrane protein 132E                                                | ENST00000321639 | -0,854982292 |
| A_33_P3313730 | NM_001145855      | SH3BP2         | SH3-domain binding protein 2                                              | ENST00000356331 | -0,855398317 |
| A_23_P111701  | NM_004126         | GNG11          | guanine nucleotide binding protein (G protein), gamma 11                  | ENST00000248564 | -0,85599294  |
| A_23_P12554   | NM_016112         | PKD2L1         | polycystic kidney disease 2-like 1                                        | ENST00000318222 | -0,856423373 |
| A_23_P259141  | NM_030776         | ZBP1           | Z-DNA binding protein 1                                                   | ENST00000461547 | -0,856839981 |
| A_21_P0004268 | TCONS_00010003    | XLOC_004439    |                                                                           |                 | -0,857139336 |
| A_23_P117852  | NM_014736         | KIAA0101       | KIAA0101                                                                  | ENST00000380258 | -0,857688382 |
| A_23_P206359  | NM_004360         | CDH1           | cadherin 1, type 1, E-cadherin (epithelial)                               | ENST00000261769 | -0,858164852 |
| A_23_P200728  | NM_000569         | FCGR3A         | Fc fragment of IgG, low affinity IIIa, receptor (CD16a)                   | ENST00000426740 | -0,858368653 |
| A_33_P3280779 | NM_025125         | C10orf57       | chromosome 10 open reading frame 57                                       | ENST00000372274 | -0,858712532 |
| A_23_P131024  | NM_014383         | ZBTB32         | zinc finger and BTB domain containing 32                                  | ENST00000262630 | -0,859099011 |

|               |                |             |                                                             |                 |  |              |
|---------------|----------------|-------------|-------------------------------------------------------------|-----------------|--|--------------|
| A_21_P0005568 | TCONS_00014163 | XLOC_006150 |                                                             |                 |  | -0,859239488 |
| A_33_P3328360 | NR_027033      | MIRLET7BHG  | MIRLET7B host gene (non-protein coding)                     | ENST00000360737 |  | -0,859289515 |
| A_23_P121564  | NM_000857      | GUCY1B3     | guanylate cyclase 1, soluble, beta 3                        | ENST00000264424 |  | -0,859479162 |
| A_23_P334173  | NM_002349      | LY75        | lymphocyte antigen 75                                       | ENST00000263636 |  | -0,859544136 |
| A_23_P111701  | NM_004126      | GNG11       | guanine nucleotide binding protein (G protein), gamma 11    | ENST00000248564 |  | -0,860010165 |
| A_24_P333857  | NM_032291      | SGIP1       | SH3-domain GRB2-like (endophilin) interacting protein 1     | ENST00000237247 |  | -0,860141522 |
| A_23_P251075  | NM_005491      | MAMLD1      | mastermind-like domain containing 1                         | ENST00000464149 |  | -0,860479866 |
| A_23_P120467  | NM_199427      | ZFP64       | zinc finger protein 64 homolog (mouse)                      | ENST00000361387 |  | -0,860569634 |
| A_23_P338479  | NM_014143      | CD274       | CD274 molecule                                              | ENST00000381577 |  | -0,861276707 |
| A_21_P0008908 | BF575575       | XLOC_011655 |                                                             |                 |  | -0,86147266  |
| A_24_P592012  | NM_025224      | ZBTB46      | zinc finger and BTB domain containing 46                    | ENST00000245663 |  | -0,86170944  |
| A_23_P134663  | NM_024812      | BAALC       | brain and acute leukemia, cytoplasmic                       | ENST00000309982 |  | -0,86211973  |
| A_33_P3210059 | NM_005877      | SF3A1       | splicing factor 3a, subunit 1, 120kDa                       | ENST00000439242 |  | -0,862484785 |
| A_33_P3214035 | NM_000675      | ADORA2A     | adenosine A2a receptor                                      | ENST00000436735 |  | -0,862869734 |
| A_23_P313828  | NM_181716      | CENPV       | centromere protein V                                        | ENST00000299736 |  | -0,863086324 |
| A_23_P404162  | NM_014707      | HDAC9       | histone deacetylase 9                                       | ENST00000405010 |  | -0,863185636 |
| A_23_P11201   | NM_001097579   | GPR34       | G protein-coupled receptor 34                               | ENST00000535368 |  | -0,864321725 |
| A_23_P120822  | NM_016327      | UPB1        | ureidopropionase, beta                                      | ENST00000326010 |  | -0,865661694 |
| A_23_P117852  | NM_014736      | KIAA0101    | KIAA0101                                                    | ENST00000380258 |  | -0,866491926 |
| A_21_P0003919 | BC095491       | FRG1B       | FSHD region gene 1 family, member B                         |                 |  | -0,86654971  |
| A_32_P117170  | NM_001122838   | NAPEPLD     | N-acyl phosphatidylethanolamine phospholipase D             | ENST00000341533 |  | -0,866907761 |
| A_23_P1331    | NM_080801      | COL13A1     | collagen, type XIII, alpha 1                                | ENST00000478219 |  | -0,867365219 |
| A_23_P118     | NM_001439      | EXTL2       | exostoses (multiple)-like 2                                 | ENST00000370114 |  | -0,867428075 |
| A_23_P204269  | NM_006313      | USP15       | ubiquitin specific peptidase 15                             | ENST00000393654 |  | -0,867749566 |
| A_33_P3376636 | NM_001017989   | OPA3        | optic atrophy 3 (autosomal recessive, with chorea and spas) | ENST00000323060 |  | -0,868656681 |
| A_23_P138680  | NM_172200      | IL15RA      | interleukin 15 receptor, alpha                              | ENST00000379972 |  | -0,869238084 |
| A_23_P154358  | NM_144707      | PROM2       | prominin 2                                                  | ENST00000487138 |  | -0,869801605 |
| A_33_P3606465 | NR_033754      | CBX3P2      | chromobox homolog 3 pseudogene 2                            |                 |  | -0,870608539 |
| A_33_P3211666 | NM_003855      | IL18R1      | interleukin 18 receptor 1                                   | ENST00000334376 |  | -0,871009001 |

|               |                 |                |                                                               |                 |              |
|---------------|-----------------|----------------|---------------------------------------------------------------|-----------------|--------------|
| A_23_P120467  | NM_199427       | ZFP64          | zinc finger protein 64 homolog (mouse)                        | ENST00000361387 | -0,871373587 |
| A_23_P23279   | NM_052862       | RCSD1          | RCSD domain containing 1                                      | ENST00000367854 | -0,87143748  |
| A_33_P3780123 | AK057627        | FLJ33065       | uncharacterized LOC440952                                     |                 | -0,871448514 |
| A_33_P3384133 | NM_001163075    | C17orf99       | chromosome 17 open reading frame 99                           | ENST00000340363 | -0,871464932 |
| A_23_P13382   | NM_001013254    | LSP1           | lymphocyte-specific protein 1                                 | ENST00000406638 | -0,871602994 |
| A_23_P210482  | NM_000022       | ADA            | adenosine deaminase                                           | ENST00000464097 | -0,871929899 |
| A_33_P3379039 | NM_001178126    | IGLL5          | immunoglobulin lambda-like polypeptide 5                      | ENST00000390321 | -0,872079311 |
| A_33_P3232960 | NM_001010870    | TDRD6          | tudor domain containing 6                                     | ENST00000544460 | -0,8721829   |
| A_21_P0003409 | ENST00000515860 | XLOC_003709    |                                                               | ENST00000515860 | -0,872495862 |
| A_23_P80974   | NM_005651       | TDO2           | tryptophan 2,3-dioxygenase                                    | ENST00000510293 | -0,872710009 |
| A_23_P166797  | NM_022147       | RTP4           | receptor (chemosensory) transporter protein 4                 | ENST00000259030 | -0,873780833 |
| A_23_P60146   | NM_006207       | PDGFRL         | platelet-derived growth factor receptor-like                  | ENST00000251630 | -0,874070525 |
| A_33_P3531206 | NM_001014442    | C1QTNF9B-AS1   | C1QTNF9B antisense RNA 1 (non-protein coding)                 | ENST00000417034 | -0,874362241 |
| A_23_P113161  | NM_030806       | C1orf21        | chromosome 1 open reading frame 21                            | ENST00000235307 | -0,874363456 |
| A_21_P0010940 | NM_001100874    | SLC9B1         | solute carrier family 9, subfamily B (cation proton antiporte | ENST00000416231 | -0,874667645 |
| A_23_P393620  | NM_006528       | TFPI2          | tissue factor pathway inhibitor 2                             | ENST00000222543 | -0,875077777 |
| A_23_P407112  | NM_145263       | SPATA18        | spermatogenesis associated 18 homolog (rat)                   | ENST00000295213 | -0,876147875 |
| A_24_P97405   | NM_003965       | CCRL2          | chemokine (C-C motif) receptor-like 2                         | ENST00000400880 | -0,876733513 |
| A_33_P3342081 | NM_001198       | PRDM1          | PR domain containing 1, with ZNF domain                       | ENST00000369096 | -0,87748445  |
| A_23_P112554  | NM_001855       | COL15A1        | collagen, type XV, alpha 1                                    | ENST00000375001 | -0,877721913 |
| A_21_P0013372 | ENST00000439058 | XLOC_l2_013301 |                                                               | ENST00000439058 | -0,878185947 |
| A_23_P256956  | NM_005733       | KIF20A         | kinesin family member 20A                                     | ENST00000502338 | -0,87851492  |
| A_33_P3362291 | AK001351        | FLJ10489       | uncharacterized protein FLJ10489                              | ENST00000503718 | -0,87888693  |
| A_21_P0002052 | TCONS_00003286  | XLOC_002099    |                                                               |                 | -0,879273676 |
| A_23_P64611   | NM_176798       | P2RY6          | pyrimidinergic receptor P2Y, G-protein coupled, 6             | ENST00000538328 | -0,879708082 |
| A_32_P206479  | NM_178457       | ZNF831         | zinc finger protein 831                                       | ENST00000371030 | -0,879931577 |
| A_23_P108823  | NM_032523       | OSBPL6         | oxysterol binding protein-like 6                              | ENST00000315022 | -0,88049088  |
| A_24_P472007  | NM_001080421    | UNC13A         | unc-13 homolog A (C. elegans)                                 | ENST00000252773 | -0,880528807 |
| A_23_P103486  | NM_000775       | CYP2J2         | cytochrome P450, family 2, subfamily J, polypeptide 2         | ENST00000469406 | -0,88114615  |

|               |                 |              |                                                              |                 |              |
|---------------|-----------------|--------------|--------------------------------------------------------------|-----------------|--------------|
| A_21_P0001817 | ENST00000417930 | XLOC_001331  |                                                              | ENST00000417930 | -0,881346073 |
| A_32_P345659  | NM_194293       | XIRP1        | xin actin-binding repeat containing 1                        | ENST00000421646 | -0,881585924 |
| A_21_P0010465 | TCONS_00029809  | XLOC_014244  |                                                              |                 | -0,881908769 |
| A_21_P0014570 | ENST00000547027 | LOC100505814 |                                                              | ENST00000547027 | -0,881958767 |
| A_32_P231617  | NM_014220       | TM4SF1       | transmembrane 4 L six family member 1                        | ENST00000383054 | -0,882214482 |
| A_23_P94412   | NM_025239       | PDCD1LG2     | programmed cell death 1 ligand 2                             | ENST00000397747 | -0,882415047 |
| A_33_P3284508 | NM_001174104    | CD14         | CD14 molecule                                                | ENST00000302014 | -0,884256726 |
| A_23_P46039   | NM_032738       | FCRLA        | Fc receptor-like A                                           | ENST00000236938 | -0,884648004 |
| A_23_P117852  | NM_014736       | KIAA0101     | KIAA0101                                                     | ENST00000380258 | -0,885602495 |
| A_24_P322353  | NM_024430       | PSTPIP2      | proline-serine-threonine phosphatase interacting protein 2   | ENST00000495213 | -0,886024102 |
| A_24_P414376  | NM_016531       | KLF3         | Kruppel-like factor 3 (basic)                                | ENST00000261438 | -0,886287305 |
| A_23_P1331    | NM_080801       | COL13A1      | collagen, type XIII, alpha 1                                 | ENST00000478219 | -0,8863774   |
| A_23_P117852  | NM_014736       | KIAA0101     | KIAA0101                                                     | ENST00000380258 | -0,88676609  |
| A_33_P3215883 | NM_002019       | FLT1         | fms-related tyrosine kinase 1 (vascular endothelial growth f | ENST00000282397 | -0,886779441 |
| A_33_P3829391 | BC030809        | LOC641510    | uncharacterized LOC641510                                    |                 | -0,886930402 |
| A_24_P335305  | NM_006187       | OAS3         | 2'-5'-oligoadenylate synthetase 3, 100kDa                    | ENST00000323881 | -0,887427241 |
| A_23_P118     | NM_001439       | EXTL2        | exostoses (multiple)-like 2                                  | ENST00000370114 | -0,887869331 |
| A_23_P210690  | NM_021158       | TRIB3        | tribbles homolog 3 (Drosophila)                              | ENST00000217233 | -0,88905403  |
| A_23_P117852  | NM_014736       | KIAA0101     | KIAA0101                                                     | ENST00000380258 | -0,889100206 |
| A_23_P256473  | NM_006379       | SEMA3C       | sema domain, immunoglobulin domain (Ig), short basic don     | ENST00000265361 | -0,890306793 |
| A_23_P121564  | NM_000857       | GUCY1B3      | guanylate cyclase 1, soluble, beta 3                         | ENST00000264424 | -0,890523495 |
| A_33_P3245908 | NM_001010863    | C10orf128    | chromosome 10 open reading frame 128                         | ENST00000453436 | -0,891337613 |
| A_21_P0014186 | XR_108747       | LOC100506130 | uncharacterized LOC100506130                                 |                 | -0,891692647 |
| A_23_P300033  | NM_006206       | PDGFRA       | platelet-derived growth factor receptor, alpha polypeptide   | ENST00000257290 | -0,891811387 |
| A_24_P234415  | NM_003149       | STAC         | SH3 and cysteine rich domain                                 | ENST00000273183 | -0,891995374 |
| A_23_P117852  | NM_014736       | KIAA0101     | KIAA0101                                                     | ENST00000380258 | -0,892510647 |
| A_23_P1331    | NM_080801       | COL13A1      | collagen, type XIII, alpha 1                                 | ENST00000478219 | -0,893150451 |
| A_23_P117852  | NM_014736       | KIAA0101     | KIAA0101                                                     | ENST00000380258 | -0,893205568 |
| A_23_P436284  | NM_178859       | OSTBETA      | organic solute transporter beta                              | ENST00000334287 | -0,894197877 |

|               |                |             |                                                              |                 |              |
|---------------|----------------|-------------|--------------------------------------------------------------|-----------------|--------------|
| A_33_P3249589 | NM_022893      | BCL11A      | B-cell CLL/lymphoma 11A (zinc finger protein)                | ENST00000358510 | -0,894375335 |
| A_23_P69109   | NM_021105      | PLSCR1      | phospholipid scramblase 1                                    | ENST00000448205 | -0,896433989 |
| A_21_P0007881 | TCONS_00021347 | XLOC_010117 |                                                              |                 | -0,896602968 |
| A_23_P150903  | NM_018099      | FAR2        | fatty acyl CoA reductase 2                                   | ENST00000182377 | -0,896605161 |
| A_24_P188800  | NM_017923      | Mar-01      | membrane-associated ring finger (C3HC4) 1                    | ENST00000339875 | -0,896775832 |
| A_21_P0000740 | NR_038260      | HIVEP3      | human immunodeficiency virus type I enhancer binding pro     | ENST00000491442 | -0,897102045 |
| A_23_P105465  | NM_004072      | CMKLR1      | chemokine-like receptor 1                                    | ENST00000550402 | -0,897416438 |
| A_33_P3246833 | NM_173843      | IL1RN       | interleukin 1 receptor antagonist                            | ENST00000259206 | -0,897935964 |
| A_23_P113777  | NM_004791      | ITGBL1      | integrin, beta-like 1 (with EGF-like repeat domains)         | ENST00000376162 | -0,898104401 |
| A_32_P86763   | NM_004613      | TGM2        | transglutaminase 2 (C polypeptide, protein-glutamine-gamr    | ENST00000361475 | -0,898194147 |
| A_23_P64828   | NM_002534      | OAS1        | 2'-5'-oligoadenylate synthetase 1, 40/46kDa                  | ENST00000377508 | -0,898889223 |
| A_23_P121564  | NM_000857      | GUCY1B3     | guanylate cyclase 1, soluble, beta 3                         | ENST00000264424 | -0,89912384  |
| A_23_P301521  | NM_020848      | KIAA1462    | KIAA1462                                                     | ENST00000375377 | -0,899161468 |
| A_23_P121564  | NM_000857      | GUCY1B3     | guanylate cyclase 1, soluble, beta 3                         | ENST00000264424 | -0,899423104 |
| A_33_P3309984 | NM_000221      | KHK         | ketoheokinase (fructokinase)                                 | ENST00000260599 | -0,89985475  |
| A_23_P130182  | NM_004217      | AURKB       | aurora kinase B                                              | ENST00000534871 | -0,900241851 |
| A_23_P73837   | NM_138636      | TLR8        | toll-like receptor 8                                         | ENST00000218032 | -0,900315115 |
| A_21_P0010626 | NM_058179      | PSAT1       | phosphoserine aminotransferase 1                             | ENST00000421149 | -0,901235053 |
| A_23_P151294  | NM_000619      | IFNG        | interferon, gamma                                            | ENST00000229135 | -0,901392228 |
| A_23_P104438  | NM_032578      | MYPN        | myopalladin                                                  | ENST00000354393 | -0,901964018 |
| A_23_P352266  | NM_000633      | BCL2        | B-cell CLL/lymphoma 2                                        | ENST00000398117 | -0,902077688 |
| A_33_P3308686 | NM_020785      | CC2D2A      | coiled-coil and C2 domain containing 2A                      | ENST00000438599 | -0,902682258 |
| A_23_P55749   | NM_015719      | COL5A3      | collagen, type V, alpha 3                                    | ENST00000264828 | -0,903040413 |
| A_23_P112554  | NM_001855      | COL15A1     | collagen, type XV, alpha 1                                   | ENST00000375001 | -0,904816158 |
| A_33_P3413741 | NM_000916      | OXTR        | oxytocin receptor                                            | ENST00000316793 | -0,905299377 |
| A_32_P26376   | NM_152305      | POGLUT1     | protein O-glucosyltransferase 1                              | ENST00000295588 | -0,906510585 |
| A_23_P126735  | NM_000572      | IL10        | interleukin 10                                               | ENST00000423557 | -0,907570278 |
| A_33_P3212615 | NM_006287      | TFPI        | tissue factor pathway inhibitor (lipoprotein-associated coag | ENST00000233156 | -0,90800611  |
| A_23_P89780   | NM_198129      | LAMA3       | laminin, alpha 3                                             | ENST00000416669 | -0,908435272 |



|               |                   |                |                                                                |                 |              |
|---------------|-------------------|----------------|----------------------------------------------------------------|-----------------|--------------|
| A_33_P3220470 | NM_005585         | SMAD6          | SMAD family member 6                                           | ENST00000338426 | -0,910113734 |
| A_24_P335620  | NM_003486         | SLC7A5         | solute carrier family 7 (amino acid transporter light chain, L | ENST00000261622 | -0,910445985 |
| A_23_P117852  | NM_014736         | KIAA0101       | KIAA0101                                                       | ENST00000380258 | -0,910467252 |
| A_23_P432448  | NR_024166         | MGC3771        | uncharacterized LOC81854                                       |                 | -0,91048489  |
| A_24_P941866  | AK096941          | C5orf56        | chromosome 5 open reading frame 56                             | ENST00000337752 | -0,913062488 |
| A_21_P0007626 | THC2748864        | XLOC_009880    |                                                                |                 | -0,914424125 |
| A_23_P61487   | NM_018205         | LRRC20         | leucine rich repeat containing 20                              | ENST00000358141 | -0,915535273 |
| A_24_P227091  | NM_004523         | KIF11          | kinesin family member 11                                       | ENST00000260731 | -0,915618654 |
| A_21_P0010364 | ENST00000428765   | XLOC_014257    |                                                                | ENST00000428765 | -0,916620833 |
| A_24_P126628  | NM_015257         | TMEM194A       | transmembrane protein 194A                                     | ENST00000300128 | -0,916690592 |
| A_23_P139704  | NM_001946         | DUSP6          | dual specificity phosphatase 6                                 | ENST00000279488 | -0,916920503 |
| A_24_P208909  | NM_015271         | TRIM2          | tripartite motif containing 2                                  | ENST00000338700 | -0,917335669 |
| A_33_P3213707 | NM_025239         | PDCD1LG2       | programmed cell death 1 ligand 2                               | ENST00000397745 | -0,917339442 |
| A_21_P0005052 | TCONS_00012260    | XLOC_005811    |                                                                |                 | -0,917622451 |
| A_33_P3263890 | NM_006902         | PRRX1          | paired related homeobox 1                                      | ENST00000239461 | -0,91770152  |
| A_24_P7121    | NM_024677         | NSUN7          | NOP2/Sun domain family, member 7                               | ENST00000381782 | -0,918047862 |
| A_33_P3361067 | NM_004827         | ABCG2          | ATP-binding cassette, sub-family G (WHITE), member 2           | ENST00000237612 | -0,918928819 |
| A_21_P0011933 | NR_037597         | LOC442028      | uncharacterized LOC442028                                      |                 | -0,919193132 |
| A_23_P126735  | NM_000572         | IL10           | interleukin 10                                                 | ENST00000423557 | -0,920027118 |
| A_21_P0010281 | ENST00000440714   | XLOC_014081    |                                                                | ENST00000440714 | -0,920292419 |
| A_33_P3402489 | NM_006187         | OAS3           | 2'-5'-oligoadenylate synthetase 3, 100kDa                      | ENST00000228928 | -0,920633184 |
| A_23_P320578  | NM_002928         | RGS16          | regulator of G-protein signaling 16                            | ENST00000367558 | -0,921581279 |
| A_21_P0010296 | THC2740132        | XLOC_014110    |                                                                |                 | -0,922572945 |
| A_23_P50108   | NM_006101         | NDC80          | NDC80 homolog, kinetochore complex component ( <i>S. cerev</i> | ENST00000261597 | -0,922794226 |
| A_23_P52761   | NM_002423         | MMP7           | matrix metalloproteinase 7 (matrilysin, uterine)               | ENST00000260227 | -0,922954679 |
| A_33_P3239185 | NM_001252065      | SYT7           | synaptotagmin VII                                              | ENST00000263846 | -0,923543985 |
| A_21_P0012171 | TCONS_I2_00016979 | XLOC_I2_008991 |                                                                |                 | -0,923873087 |
| A_24_P303091  | NM_001565         | CXCL10         | chemokine (C-X-C motif) ligand 10                              | ENST00000306602 | -0,925134396 |
| A_23_P1331    | NM_080801         | COL13A1        | collagen, type XIII, alpha 1                                   | ENST00000478219 | -0,925225848 |

|               |                 |                |                                                             |                 |              |
|---------------|-----------------|----------------|-------------------------------------------------------------|-----------------|--------------|
| A_23_P34946   | NM_014388       | DIEXF          | digestive organ expansion factor homolog (zebrafish)        |                 | -0,925742599 |
| A_23_P343398  | NM_001838       | CCR7           | chemokine (C-C motif) receptor 7                            | ENST00000246657 | -0,926664863 |
| A_23_P134454  | NM_001753       | CAV1           | caveolin 1, caveolae protein, 22kDa                         | ENST00000341049 | -0,927507381 |
| A_23_P333498  | NM_030636       | EEPD1          | endonuclease/exonuclease/phosphatase family domain cor      | ENST00000242108 | -0,927741193 |
| A_21_P0002805 | ENST00000467896 | XLOC_002921    |                                                             | ENST00000467896 | -0,927806455 |
| A_23_P117852  | NM_014736       | KIAA0101       | KIAA0101                                                    | ENST00000380258 | -0,928384203 |
| A_33_P3323218 | NM_024744       | ALS2CR8        | amyotrophic lateral sclerosis 2 (juvenile) chromosome regic | ENST00000320443 | -0,929098298 |
| A_23_P133474  | NM_002084       | GPX3           | glutathione peroxidase 3 (plasma)                           | ENST00000458211 | -0,929369466 |
| A_21_P0008360 | TCONS_00022563  | XLOC_010881    |                                                             |                 | -0,930388397 |
| A_23_P12082   | NM_001025199    | CHI3L2         | chitinase 3-like 2                                          | ENST00000369748 | -0,931164451 |
| A_33_P3354607 | NM_002984       | CCL4           | chemokine (C-C motif) ligand 4                              | ENST00000250151 | -0,931960147 |
| A_23_P162547  | NM_000432       | MYL2           | myosin, light chain 2, regulatory, cardiac, slow            | ENST00000549029 | -0,93332088  |
| A_33_P3298810 | NM_005304       | FFAR3          | free fatty acid receptor 3                                  | ENST00000454971 | -0,933378594 |
| A_24_P208567  | NM_003855       | IL18R1         | interleukin 18 receptor 1                                   | ENST00000409599 | -0,934098969 |
| A_21_P0009752 | TCONS_00027258  | XLOC_013282    |                                                             |                 | -0,934534755 |
| A_23_P120467  | NM_199427       | ZFP64          | zinc finger protein 64 homolog (mouse)                      | ENST00000361387 | -0,935446872 |
| A_23_P217845  | NM_002928       | RGS16          | regulator of G-protein signaling 16                         | ENST00000367558 | -0,935686565 |
| A_21_P0013684 | ENST00000426204 | XLOC_I2_015342 |                                                             | ENST00000426204 | -0,935923592 |
| A_33_P3638471 | BC027954        | TRGV7          | T cell receptor gamma variable 7 (pseudogene)               |                 | -0,936305958 |
| A_23_P83200   | NM_152572       | AK8            | adenylate kinase 8                                          | ENST00000467161 | -0,9364844   |
| A_21_P0005162 | AK055022        | XLOC_005681    |                                                             |                 | -0,93662505  |
| A_33_P3293446 | NM_020848       | KIAA1462       | KIAA1462                                                    | ENST00000375377 | -0,936823676 |
| A_21_P0013743 | ENST00000426204 | XLOC_I2_015342 |                                                             | ENST00000426204 | -0,93814437  |
| A_23_P13094   | NM_002425       | MMP10          | matrix metalloproteinase 10 (stromelysin 2)                 | ENST00000279441 | -0,938240799 |
| A_23_P205584  | NM_016475       | JKAMP          | JNK1/MAPK8-associated membrane protein                      |                 | -0,938535019 |
| A_23_P1331    | NM_080801       | COL13A1        | collagen, type XIII, alpha 1                                | ENST00000478219 | -0,939233878 |
| A_23_P149545  | NM_003528       | HIST2H2BE      | histone cluster 2, H2be                                     | ENST00000369155 | -0,939245058 |
| A_23_P82523   | NM_000927       | ABCB1          | ATP-binding cassette, sub-family B (MDR/TAP), member 1      | ENST00000475929 | -0,939611403 |
| A_33_P3350583 | NM_138819       | FAM122C        | family with sequence similarity 122C                        | ENST00000370784 | -0,942947947 |

|               |                  |                |                                                       |                 |              |
|---------------|------------------|----------------|-------------------------------------------------------|-----------------|--------------|
| A_23_P1331    | NM_080801        | COL13A1        | collagen, type XIII, alpha 1                          | ENST00000478219 | -0,943113955 |
| A_23_P121564  | NM_000857        | GUCY1B3        | guanylate cyclase 1, soluble, beta 3                  | ENST00000264424 | -0,94484459  |
| A_33_P3365760 | NM_012108        | STAP1          | signal transducing adaptor family member 1            | ENST00000396225 | -0,945450248 |
| A_23_P210763  | NM_000214        | JAG1           | jagged 1                                              | ENST00000254958 | -0,945618672 |
| A_33_P3399263 | NM_001243539     | IL15RA         | interleukin 15 receptor, alpha                        | ENST00000379972 | -0,945940033 |
| A_24_P235266  | NM_001001555     | GRB10          | growth factor receptor-bound protein 10               | ENST00000403097 | -0,94613822  |
| A_23_P404494  | NM_002185        | IL7R           | interleukin 7 receptor                                | ENST00000343305 | -0,946371856 |
| A_23_P1331    | NM_080801        | COL13A1        | collagen, type XIII, alpha 1                          | ENST00000478219 | -0,9485625   |
| A_24_P107317  | NM_004205        | USP2           | ubiquitin specific peptidase 2                        | ENST00000260187 | -0,948606689 |
| A_33_P3258346 | NM_017523        | XAF1           | XIAP associated factor 1                              | ENST00000361842 | -0,951702503 |
| A_23_P127288  | NM_000417        | IL2RA          | interleukin 2 receptor, alpha                         | ENST00000379954 | -0,952057195 |
| A_32_P72110   | NM_006505        | PVR            | poliovirus receptor                                   | ENST00000344956 | -0,952204216 |
| A_33_P3381513 | NM_014143        | CD274          | CD274 molecule                                        | ENST00000492923 | -0,953681626 |
| A_23_P46936   | NM_000399        | EGR2           | early growth response 2                               | ENST00000411732 | -0,953747196 |
| A_21_P0003110 | THC2659360       | XLOC_003077    |                                                       |                 | -0,954471162 |
| A_23_P165624  | NM_007115        | TNFAIP6        | tumor necrosis factor, alpha-induced protein 6        | ENST00000460812 | -0,955291971 |
| A_23_P126649  | NM_024554        | PGBD5          | piggyBac transposable element derived 5               | ENST00000321327 | -0,956599031 |
| A_33_P3326210 | NM_001017420     | ESCO2          | establishment of cohesion 1 homolog 2 (S. cerevisiae) | ENST00000397418 | -0,95826674  |
| A_24_P45446   | NM_052941        | GBP4           | guanylate binding protein 4                           | ENST00000471938 | -0,958798759 |
| A_21_P0005649 | TCONS_00014594   | XLOC_006699    |                                                       |                 | -0,959697466 |
| A_23_P89431   | NM_002982        | CCL2           | chemokine (C-C motif) ligand 2                        | ENST00000225831 | -0,963279232 |
| A_21_P0013514 | TCONS_I2_0002818 | XLOC_I2_014504 |                                                       |                 | -0,963885832 |
| A_24_P320033  | NM_005191        | CD80           | CD80 molecule                                         | ENST00000264246 | -0,963983283 |
| A_23_P1331    | NM_080801        | COL13A1        | collagen, type XIII, alpha 1                          | ENST00000478219 | -0,964057869 |
| A_21_P0013475 | TCONS_I2_0002773 | XLOC_I2_014191 |                                                       |                 | -0,964442455 |
| A_24_P45451   | NM_052931        | SLAMF6         | SLAM family member 6                                  | ENST00000368057 | -0,965536964 |
| A_23_P209678  | NM_002664        | PLEK           | pleckstrin                                            | ENST00000234313 | -0,966142386 |
| A_23_P105794  | NM_033255        | EPSTI1         | epithelial stromal interaction 1 (breast)             | ENST00000476830 | -0,966530548 |
| A_23_P151294  | NM_000619        | IFNG           | interferon, gamma                                     | ENST00000229135 | -0,966545705 |

|               |                 |                |                                                           |                 |              |
|---------------|-----------------|----------------|-----------------------------------------------------------|-----------------|--------------|
| A_33_P3337549 | NM_001163942    | ABCB5          | ATP-binding cassette, sub-family B (MDR/TAP), member 5    | ENST00000443026 | -0,966744729 |
| A_23_P89431   | NM_002982       | CCL2           | chemokine (C-C motif) ligand 2                            | ENST00000225831 | -0,967086021 |
| A_23_P11201   | NM_001097579    | GPR34          | G protein-coupled receptor 34                             | ENST00000535368 | -0,967608526 |
| A_33_P3295203 | NM_001523       | HAS1           | hyaluronan synthase 1                                     | ENST00000376737 | -0,968261781 |
| A_23_P89431   | NM_002982       | CCL2           | chemokine (C-C motif) ligand 2                            | ENST00000225831 | -0,968429293 |
| A_24_P743869  | NM_001195304    | BBIP1          | BBSome interacting protein 1                              | ENST00000448814 | -0,969090028 |
| A_23_P151294  | NM_000619       | IFNG           | interferon, gamma                                         | ENST00000229135 | -0,969729042 |
| A_23_P108823  | NM_032523       | OSBPL6         | oxysterol binding protein-like 6                          | ENST00000315022 | -0,970052294 |
| A_24_P385313  | NM_002840       | PTPRF          | protein tyrosine phosphatase, receptor type, F            | ENST00000359947 | -0,97024752  |
| A_23_P37892   | NM_133443       | GPT2           | glutamic pyruvate transaminase (alanine aminotransferase) | ENST00000440783 | -0,970586103 |
| A_23_P105794  | NM_033255       | EPSTI1         | epithelial stromal interaction 1 (breast)                 | ENST00000476830 | -0,970733685 |
| A_23_P89431   | NM_002982       | CCL2           | chemokine (C-C motif) ligand 2                            | ENST00000225831 | -0,972700572 |
| A_23_P151294  | NM_000619       | IFNG           | interferon, gamma                                         | ENST00000229135 | -0,973751861 |
| A_23_P89431   | NM_002982       | CCL2           | chemokine (C-C motif) ligand 2                            | ENST00000225831 | -0,974870971 |
| A_23_P89431   | NM_002982       | CCL2           | chemokine (C-C motif) ligand 2                            | ENST00000225831 | -0,975848742 |
| A_32_P30649   | NM_004454       | ETV5           | ets variant 5                                             | ENST00000306376 | -0,975981352 |
| A_24_P272451  | AK057142        | C17orf87       | chromosome 17 open reading frame 87                       |                 | -0,97614141  |
| A_23_P89431   | NM_002982       | CCL2           | chemokine (C-C motif) ligand 2                            | ENST00000225831 | -0,977648874 |
| A_23_P151294  | NM_000619       | IFNG           | interferon, gamma                                         | ENST00000229135 | -0,977677891 |
| A_21_P0009825 | ENST00000449270 | XLOC_013457    |                                                           | ENST00000449270 | -0,978251456 |
| A_23_P105794  | NM_033255       | EPSTI1         | epithelial stromal interaction 1 (breast)                 | ENST00000476830 | -0,978354805 |
| A_23_P501754  | NM_000759       | CSF3           | colony stimulating factor 3 (granulocyte)                 | ENST00000394149 | -0,97865699  |
| A_21_P0013370 | ENST00000439058 | XLOC_l2_013301 |                                                           | ENST00000439058 | -0,981165759 |
| A_23_P111701  | NM_004126       | GNG11          | guanine nucleotide binding protein (G protein), gamma 11  | ENST00000248564 | -0,981540471 |
| A_23_P74609   | NM_015714       | G0S2           | G0/G1switch 2                                             | ENST00000367029 | -0,982023697 |
| A_23_P206359  | NM_004360       | CDH1           | cadherin 1, type 1, E-cadherin (epithelial)               | ENST00000261769 | -0,982590017 |
| A_23_P105465  | NM_004072       | CMKLR1         | chemokine-like receptor 1                                 | ENST00000550402 | -0,982946234 |
| A_23_P89431   | NM_002982       | CCL2           | chemokine (C-C motif) ligand 2                            | ENST00000225831 | -0,983825566 |
| A_23_P256956  | NM_005733       | KIF20A         | kinesin family member 20A                                 | ENST00000502338 | -0,986241548 |

|               |                 |              |                                                                 |                 |              |
|---------------|-----------------|--------------|-----------------------------------------------------------------|-----------------|--------------|
| A_23_P89431   | NM_002982       | CCL2         | chemokine (C-C motif) ligand 2                                  | ENST00000225831 | -0,987087168 |
| A_23_P89431   | NM_002982       | CCL2         | chemokine (C-C motif) ligand 2                                  | ENST00000225831 | -0,987378049 |
| A_23_P7144    | NM_001511       | CXCL1        | chemokine (C-X-C motif) ligand 1 (melanoma growth stimu         | ENST00000395761 | -0,988054476 |
| A_23_P112554  | NM_001855       | COL15A1      | collagen, type XV, alpha 1                                      | ENST00000375001 | -0,988579121 |
| A_33_P3248439 | NM_033446       | FAM125B      | family with sequence similarity 125, member B                   | ENST00000361171 | -0,9888232   |
| A_23_P105794  | NM_033255       | EPSTI1       | epithelial stromal interaction 1 (breast)                       | ENST00000476830 | -0,989223045 |
| A_23_P110196  | NM_016323       | HERC5        | hect domain and RLD 5                                           | ENST00000502913 | -0,991848764 |
| A_24_P7594    | NM_030641       | APOL6        | apolipoprotein L, 6                                             |                 | -0,992008452 |
| A_23_P200829  | NM_015326       | SRGAP2       | SLIT-ROBO Rho GTPase activating protein 2                       | ENST00000295713 | -0,992066509 |
| A_24_P416997  | NM_145641       | APOL3        | apolipoprotein L, 3                                             | ENST00000397287 | -0,993065355 |
| A_33_P3225625 | NM_001003799    | TARP         | TCR gamma alternate reading frame protein                       | ENST00000443402 | -0,993109474 |
| A_23_P105794  | NM_033255       | EPSTI1       | epithelial stromal interaction 1 (breast)                       | ENST00000476830 | -0,994828726 |
| A_23_P250607  | NM_005032       | PLS3         | plastin 3                                                       | ENST00000481823 | -0,996274001 |
| A_23_P151294  | NM_000619       | IFNG         | interferon, gamma                                               | ENST00000229135 | -0,997350347 |
| A_21_P0014724 | XR_112814       | LOC100507336 | uncharacterized LOC100507336                                    |                 | -0,997491252 |
| A_33_P3421728 | NM_001346       | DGKG         | diacylglycerol kinase, gamma 90kDa                              | ENST00000265022 | -0,998820524 |
| A_32_P157481  | NM_005236       | ERCC4        | excision repair cross-complementing rodent repair deficien      | ENST00000311895 | -0,998912959 |
| A_33_P3289406 | NR_026998       | LOC91450     | uncharacterized LOC91450                                        |                 | -0,99982441  |
| A_23_P27400   | NM_001523       | HAS1         | hyaluronan synthase 1                                           | ENST00000540069 | -1,001431374 |
| A_23_P151294  | NM_000619       | IFNG         | interferon, gamma                                               | ENST00000229135 | -1,001902632 |
| A_24_P350759  | NM_004171       | SLC1A2       | solute carrier family 1 (glial high affinity glutamate transpor | ENST00000278379 | -1,003024392 |
| A_33_P3281695 | NM_001243133    | NLRP3        | NLR family, pyrin domain containing 3                           | ENST00000391827 | -1,003217199 |
| A_23_P161218  | NM_014391       | ANKRD1       | ankyrin repeat domain 1 (cardiac muscle)                        | ENST00000371697 | -1,003390178 |
| A_33_P3243230 | ENST00000401931 | IL8          | interleukin 8                                                   | ENST00000401931 | -1,003946781 |
| A_32_P53524   | NM_004822       | NTN1         | netrin 1                                                        | ENST00000173229 | -1,004813959 |
| A_23_P368067  | NM_018833       | TAP2         | transporter 2, ATP-binding cassette, sub-family B (MDR/TAF      | ENST00000374899 | -1,005035554 |
| A_23_P119835  | NM_021209       | NLRC4        | NLR family, CARD domain containing 4                            | ENST00000404025 | -1,007916518 |
| A_23_P105794  | NM_033255       | EPSTI1       | epithelial stromal interaction 1 (breast)                       | ENST00000476830 | -1,008430467 |
| A_24_P171268  | NM_182663       | RASSF5       | Ras association (RalGDS/AF-6) domain family member 5            | ENST00000304534 | -1,009052002 |



|               |              |         |                                                     |                 |              |
|---------------|--------------|---------|-----------------------------------------------------|-----------------|--------------|
| A_33_P3352467 | NM_001050    | SSTR2   | somatostatin receptor 2                             | ENST00000357585 | -1,012155445 |
| A_33_P3315263 | NM_175834    | KRT79   | keratin 79                                          | ENST00000330553 | -1,012264129 |
| A_23_P105794  | NM_033255    | EPSTI1  | epithelial stromal interaction 1 (breast)           | ENST00000476830 | -1,012562043 |
| A_24_P942321  | NM_018027    | FRMD4A  | FERM domain containing 4A                           | ENST00000357447 | -1,015399825 |
| A_33_P3281191 | NM_002508    | NID1    | nidogen 1                                           | ENST00000366595 | -1,015569268 |
| A_23_P148475  | NM_012310    | KIF4A   | kinesin family member 4A                            | ENST00000544650 | -1,015725023 |
| A_23_P105794  | NM_033255    | EPSTI1  | epithelial stromal interaction 1 (breast)           | ENST00000476830 | -1,017360019 |
| A_23_P9883    | NM_001079821 | NLRP3   | NLR family, pyrin domain containing 3               | ENST00000336119 | -1,017594    |
| A_23_P434809  | NM_002964    | S100A8  | S100 calcium binding protein A8                     | ENST00000368733 | -1,017820432 |
| A_23_P500400  | NM_080284    | ABCA6   | ATP-binding cassette, sub-family A (ABC1), member 6 | ENST00000284425 | -1,017915102 |
| A_23_P110196  | NM_016323    | HERC5   | hect domain and RLD 5                               | ENST00000502913 | -1,020072799 |
| A_33_P3225512 | NM_002535    | OAS2    | 2'-5'-oligoadenylate synthetase 2, 69/71kDa         | ENST00000392583 | -1,020969027 |
| A_24_P299685  | NM_198389    | PDPN    | podoplanin                                          | ENST00000487038 | -1,021015182 |
| A_23_P255535  | NM_004043    | ASMT    | acetylserotonin O-methyltransferase                 | ENST00000381241 | -1,022162509 |
| A_33_P3374205 | NM_002417    | MKI67   | antigen identified by monoclonal antibody Ki-67     | ENST00000537609 | -1,022775175 |
| A_24_P557479  | NM_017523    | XAF1    | XIAP associated factor 1                            | ENST00000361842 | -1,023116019 |
| A_33_P3303810 | NM_005558    | LAD1    | ladinin 1                                           | ENST00000367313 | -1,023218948 |
| A_23_P105794  | NM_033255    | EPSTI1  | epithelial stromal interaction 1 (breast)           | ENST00000476830 | -1,023246954 |
| A_23_P105465  | NM_004072    | CMKLR1  | chemokine-like receptor 1                           | ENST00000550402 | -1,023368882 |
| A_33_P3224803 | NM_000265    | NCF1    | neutrophil cytosolic factor 1                       | ENST00000438106 | -1,023655557 |
| A_23_P151294  | NM_000619    | IFNG    | interferon, gamma                                   | ENST00000229135 | -1,023863555 |
| A_23_P131935  | NM_017671    | FERMT1  | fermitin family member 1                            | ENST00000217289 | -1,023920916 |
| A_33_P3299882 | NM_001199975 | UQCRB   | ubiquinol-cytochrome c reductase binding protein    | ENST00000287022 | -1,024382891 |
| A_33_P3324004 | NM_032965    | CCL15   | chemokine (C-C motif) ligand 15                     | ENST00000354059 | -1,024577193 |
| A_23_P105794  | NM_033255    | EPSTI1  | epithelial stromal interaction 1 (breast)           | ENST00000476830 | -1,025659788 |
| A_23_P110196  | NM_016323    | HERC5   | hect domain and RLD 5                               | ENST00000502913 | -1,026567029 |
| A_23_P203475  | NM_145040    | PRKCDBP | protein kinase C, delta binding protein             | ENST00000303927 | -1,026932668 |
| A_24_P319374  | NM_005814    | GPA33   | glycoprotein A33 (transmembrane)                    | ENST00000367868 | -1,0281259   |
| A_23_P80817   | NM_013259    | TAGLN3  | transgelin 3                                        | ENST00000478951 | -1,029027682 |

|               |                   |                |                                                           |                 |              |
|---------------|-------------------|----------------|-----------------------------------------------------------|-----------------|--------------|
| A_23_P74290   | NM_052942         | GBP5           | guanylate binding protein 5                               | ENST00000490568 | -1,029470726 |
| A_21_P0004772 | ENST00000452675   | XLOC_005810    |                                                           | ENST00000452675 | -1,029472229 |
| A_33_P3357609 | NM_001160419      | ZBP1           | Z-DNA binding protein 1                                   | ENST00000343535 | -1,029681191 |
| A_23_P75299   | NM_022126         | LHPP           | phospholysine phosphohistidine inorganic pyrophosphate p  | ENST00000368842 | -1,030954031 |
| A_23_P46482   | NM_018724         | IL20           | interleukin 20                                            | ENST00000367096 | -1,031118895 |
| A_33_P3321697 | NM_022140         | EPB41L4A       | erythrocyte membrane protein band 4.1 like 4A             | ENST00000261486 | -1,032077572 |
| A_23_P156687  | NM_001710         | CFB            | complement factor B                                       | ENST00000546515 | -1,033931573 |
| A_23_P110196  | NM_016323         | HERC5          | hect domain and RLD 5                                     | ENST00000502913 | -1,034732829 |
| A_32_P96000   | NM_001004341      | ETV3L          | ets variant 3-like                                        | ENST00000454449 | -1,035490524 |
| A_23_P110196  | NM_016323         | HERC5          | hect domain and RLD 5                                     | ENST00000502913 | -1,035568504 |
| A_23_P87879   | NM_001781         | CD69           | CD69 molecule                                             | ENST00000228434 | -1,036822563 |
| A_24_P237270  | NM_000675         | ADORA2A        | adenosine A2a receptor                                    | ENST00000417596 | -1,037187947 |
| A_23_P29005   | NM_022136         | SAMSN1         | SAM domain, SH3 domain and nuclear localization signals 1 | ENST00000400566 | -1,038006921 |
| A_23_P17053   | NM_019618         | IL36G          | interleukin 36, gamma                                     | ENST00000259205 | -1,038596153 |
| A_24_P362540  | NM_003887         | ASAP2          | ArfGAP with SH3 domain, ankyrin repeat and PH domain 2    | ENST00000484590 | -1,038972918 |
| A_23_P110196  | NM_016323         | HERC5          | hect domain and RLD 5                                     | ENST00000502913 | -1,039656185 |
| A_21_P0005987 | NR_015361         | LOC440896      | uncharacterized LOC440896                                 | ENST00000424682 | -1,039846367 |
| A_21_P0001111 | ENST00000440492   | XLOC_000755    |                                                           | ENST00000440492 | -1,040411784 |
| A_21_P0013613 | TCONS_I2_0002916: | XLOC_I2_015090 |                                                           |                 | -1,0411682   |
| A_23_P105465  | NM_004072         | CMKLR1         | chemokine-like receptor 1                                 | ENST00000550402 | -1,042533421 |
| A_21_P0013808 | THC2666070        | XLOC_I2_015673 |                                                           |                 | -1,043317448 |
| A_23_P161698  | NM_002422         | MMP3           | matrix metalloproteinase 3 (stromelysin 1, progelatinase) | ENST00000299855 | -1,044042087 |
| A_23_P121564  | NM_000857         | GUCY1B3        | guanylate cyclase 1, soluble, beta 3                      | ENST00000264424 | -1,045958608 |
| A_23_P82651   | NM_002523         | NPTX2          | neuronal pentraxin II                                     | ENST00000265634 | -1,046558758 |
| A_33_P3384045 | XR_110862         | NSAP11         | nervous system abundant protein 11                        |                 | -1,047943523 |
| A_23_P105465  | NM_004072         | CMKLR1         | chemokine-like receptor 1                                 | ENST00000550402 | -1,04921551  |
| A_23_P319792  | NM_019001         | XRN1           | 5'-3' exoribonuclease 1                                   | ENST00000264951 | -1,050290767 |
| A_23_P320113  | NM_080725         | SRXN1          | sulfiredoxin 1                                            | ENST00000427916 | -1,050456257 |
| A_23_P152838  | NM_002985         | CCL5           | chemokine (C-C motif) ligand 5                            | ENST00000463941 | -1,050475233 |

|               |                 |                |                                                           |                 |              |
|---------------|-----------------|----------------|-----------------------------------------------------------|-----------------|--------------|
| A_33_P3307945 | ENST00000409515 | LOC100652824   | uncharacterized LOC100652824                              | ENST00000409515 | -1,052140969 |
| A_21_P0002334 | THC2686815      | XLOC_001788    |                                                           |                 | -1,053829598 |
| A_23_P105465  | NM_004072       | CMKLR1         | chemokine-like receptor 1                                 | ENST00000550402 | -1,057363059 |
| A_33_P3340769 | NM_003816       | ADAM9          | ADAM metallopeptidase domain 9                            |                 | -1,057926016 |
| A_23_P110196  | NM_016323       | HERC5          | hect domain and RLD 5                                     | ENST00000502913 | -1,058904878 |
| A_23_P110196  | NM_016323       | HERC5          | hect domain and RLD 5                                     | ENST00000502913 | -1,060652377 |
| A_33_P3390057 | NM_014220       | TM4SF1         | transmembrane 4 L six family member 1                     | ENST00000383054 | -1,061164748 |
| A_23_P122924  | NM_002192       | INHBA          | inhibin, beta A                                           | ENST00000442711 | -1,062409356 |
| A_24_P158718  | NM_015177       | DTX4           | deltex homolog 4 (Drosophila)                             | ENST00000227451 | -1,062944441 |
| A_24_P941217  | ENST00000321276 | SGPP2          | sphingosine-1-phosphate phosphatase 2                     | ENST00000321276 | -1,063752269 |
| A_23_P122924  | NM_002192       | INHBA          | inhibin, beta A                                           | ENST00000442711 | -1,06612298  |
| A_23_P21976   | NM_001897       | CSPG4          | chondroitin sulfate proteoglycan 4                        | ENST00000308508 | -1,066361477 |
| A_23_P110196  | NM_016323       | HERC5          | hect domain and RLD 5                                     | ENST00000502913 | -1,066616629 |
| A_23_P122924  | NM_002192       | INHBA          | inhibin, beta A                                           | ENST00000442711 | -1,06671816  |
| A_23_P86470   | NM_003956       | CH25H          | cholesterol 25-hydroxylase                                | ENST00000371852 | -1,067445742 |
| A_23_P122924  | NM_002192       | INHBA          | inhibin, beta A                                           | ENST00000442711 | -1,069349189 |
| A_23_P113471  | NM_174912       | FAAH2          | fatty acid amide hydrolase 2                              | ENST00000491179 | -1,070303805 |
| A_23_P74278   | NM_001037341    | PDE4B          | phosphodiesterase 4B, cAMP-specific                       | ENST00000329654 | -1,071173229 |
| A_21_P0013181 | ENST00000439058 | XLOC_I2_013301 |                                                           | ENST00000439058 | -1,072674133 |
| A_33_P3322363 | NM_001123366    | HMSD           | histocompatibility (minor) serpin domain containing       | ENST00000408945 | -1,073230592 |
| A_23_P122924  | NM_002192       | INHBA          | inhibin, beta A                                           | ENST00000442711 | -1,073417599 |
| A_32_P526255  | NM_001145717    | PNPLA1         | patatin-like phospholipase domain containing 1            | ENST00000457797 | -1,074614925 |
| A_23_P384329  | NM_001144823    | DENND4A        | DENN/MADD domain containing 4A                            | ENST00000443035 | -1,074680131 |
| A_24_P787897  | NM_022166       | XYLT1          | xylosyltransferase I                                      |                 | -1,075265081 |
| A_33_P3288159 | NM_018136       | ASPM           | asp (abnormal spindle) homolog, microcephaly associated ( | ENST00000294732 | -1,075354995 |
| A_24_P323148  | NM_182573       | LYPD5          | LY6/PLAUR domain containing 5                             | ENST00000377950 | -1,075524153 |
| A_23_P122924  | NM_002192       | INHBA          | inhibin, beta A                                           | ENST00000442711 | -1,076921999 |
| A_33_P3283824 | NM_001135147    | SLC39A8        | solute carrier family 39 (zinc transporter), member 8     | ENST00000424970 | -1,078114156 |
| A_24_P305570  | NM_018993       | RIN2           | Ras and Rab interactor 2                                  | ENST00000255006 | -1,0783904   |

|                |                |             |                                                           |                 |              |
|----------------|----------------|-------------|-----------------------------------------------------------|-----------------|--------------|
| A_23_P94754    | NM_005118      | TNFSF15     | tumor necrosis factor (ligand) superfamily, member 15     | ENST00000374044 | -1,079493893 |
| A_23_P253692   | NM_001079858   | GPR64       | G protein-coupled receptor 64                             | ENST00000356606 | -1,079640227 |
| A_23_P122924   | NM_002192      | INHBA       | inhibin, beta A                                           | ENST00000442711 | -1,080014118 |
| A_23_P153320   | NM_000201      | ICAM1       | intercellular adhesion molecule 1                         | ENST00000264832 | -1,080835903 |
| A_23_P153320   | NM_000201      | ICAM1       | intercellular adhesion molecule 1                         | ENST00000264832 | -1,080941817 |
| A_23_P153320   | NM_000201      | ICAM1       | intercellular adhesion molecule 1                         | ENST00000264832 | -1,081327848 |
| A_23_P110196   | NM_016323      | HERC5       | hect domain and RLD 5                                     | ENST00000502913 | -1,082091247 |
| A_23_P153320   | NM_000201      | ICAM1       | intercellular adhesion molecule 1                         | ENST00000264832 | -1,082219932 |
| A_23_P122924   | NM_002192      | INHBA       | inhibin, beta A                                           | ENST00000442711 | -1,08224519  |
| A_23_P250245   | NM_001782      | CD72        | CD72 molecule                                             | ENST00000490239 | -1,083204443 |
| A_23_P153320   | NM_000201      | ICAM1       | intercellular adhesion molecule 1                         | ENST00000264832 | -1,083656805 |
| A_23_P361049   | NM_012223      | MYO1B       | myosin IB                                                 | ENST00000439065 | -1,084468255 |
| A_23_P153320   | NM_000201      | ICAM1       | intercellular adhesion molecule 1                         | ENST00000264832 | -1,086827862 |
| A_23_P153320   | NM_000201      | ICAM1       | intercellular adhesion molecule 1                         | ENST00000264832 | -1,086968782 |
| A_23_P122924   | NM_002192      | INHBA       | inhibin, beta A                                           | ENST00000442711 | -1,08834666  |
| A_23_P153320   | NM_000201      | ICAM1       | intercellular adhesion molecule 1                         | ENST00000264832 | -1,089024322 |
| A_23_P376488   | NM_000594      | TNF         | tumor necrosis factor                                     | ENST00000376122 | -1,08952981  |
| A_33_P3253687  | NR_003945      | GVINP1      | GTPase, very large interferon inducible pseudogene 1      |                 | -1,090372461 |
| A_23_P153320   | NM_000201      | ICAM1       | intercellular adhesion molecule 1                         | ENST00000264832 | -1,092964972 |
| A_23_P105465   | NM_004072      | CMKLR1      | chemokine-like receptor 1                                 | ENST00000550402 | -1,094984625 |
| A_19_P00317053 | TCONS_00012259 | XLOC_005810 |                                                           |                 | -1,096514491 |
| A_33_P3318117  | NM_000765      | CYP3A7      | cytochrome P450, family 3, subfamily A, polypeptide 7     | ENST00000292414 | -1,098666889 |
| A_24_P245379   | NM_002575      | SERPINB2    | serpin peptidase inhibitor, clade B (ovalbumin), member 2 | ENST00000457692 | -1,099885509 |
| A_23_P250564   | NM_005400      | PRKCE       | protein kinase C, epsilon                                 | ENST00000306156 | -1,101071957 |
| A_23_P122924   | NM_002192      | INHBA       | inhibin, beta A                                           | ENST00000442711 | -1,101273764 |
| A_24_P230563   | NM_000417      | IL2RA       | interleukin 2 receptor, alpha                             | ENST00000447847 | -1,106484438 |
| A_24_P766716   | NM_001142343   | CMKLR1      | chemokine-like receptor 1                                 | ENST00000312143 | -1,106557472 |
| A_23_P153320   | NM_000201      | ICAM1       | intercellular adhesion molecule 1                         | ENST00000264832 | -1,106674974 |
| A_23_P87879    | NM_001781      | CD69        | CD69 molecule                                             | ENST00000228434 | -1,106962912 |

|                |                 |                |                                                             |                 |              |
|----------------|-----------------|----------------|-------------------------------------------------------------|-----------------|--------------|
| A_21_P0001003  | ENST00000420156 | XLOC_000352    |                                                             | ENST00000420156 | -1,107077039 |
| A_23_P105465   | NM_004072       | CMKLR1         | chemokine-like receptor 1                                   | ENST00000550402 | -1,107277107 |
| A_33_P3326634  | NM_001164617    | GPC3           | glypican 3                                                  | ENST00000394299 | -1,107500429 |
| A_21_P0000558  | NR_028308       | LOC100302650   | uncharacterized LOC100302650                                |                 | -1,10937156  |
| A_33_P3402565  | NM_004415       | DSP            | desmoplakin                                                 | ENST00000397483 | -1,10948694  |
| A_23_P257815   | NM_005582       | CD180          | CD180 molecule                                              | ENST00000256447 | -1,111153441 |
| A_19_P00320881 | NR_040025       | LOC100505474   | uncharacterized LOC100505474                                |                 | -1,111847108 |
| A_21_P0011013  | THC2737662      | XLOC_I2_002729 |                                                             |                 | -1,112094397 |
| A_24_P382187   | NM_001552       | IGFBP4         | insulin-like growth factor binding protein 4                | ENST00000269593 | -1,118434834 |
| A_33_P3282641  | NR_033752       | LOC344887      | NmrA-like family domain containing 1 pseudogene             | ENST00000416764 | -1,118796414 |
| A_23_P69573    | NM_000856       | GUCY1A3        | guanylate cyclase 1, soluble, alpha 3                       | ENST00000455639 | -1,121392526 |
| A_24_P104407   | NM_145728       | SYNM           | synemin, intermediate filament protein                      | ENST00000336292 | -1,125499488 |
| A_23_P207564   | NM_002984       | CCL4           | chemokine (C-C motif) ligand 4                              | ENST00000250151 | -1,127486642 |
| A_23_P49448    | NM_024306       | FA2H           | fatty acid 2-hydroxylase                                    | ENST00000219368 | -1,128940698 |
| A_24_P322354   | NM_001039535    | SKA1           | spindle and kinetochore associated complex subunit 1        | ENST00000398452 | -1,129359301 |
| A_32_P83845    | NM_001040708    | HEY1           | hairy/enhancer-of-split related with YRPW motif 1           | ENST00000337919 | -1,129855743 |
| A_23_P52266    | NM_001548       | IFIT1          | interferon-induced protein with tetratricopeptide repeats 1 | ENST00000546318 | -1,12988033  |
| A_33_P3276615  | NM_030643       | APOL4          | apolipoprotein L, 4                                         | ENST00000352371 | -1,130078155 |
| A_23_P105465   | NM_004072       | CMKLR1         | chemokine-like receptor 1                                   | ENST00000550402 | -1,130487375 |
| A_33_P3363188  | NR_033856       | FLJ43315       | asparagine synthetase pseudogene                            |                 | -1,130734147 |
| A_23_P87879    | NM_001781       | CD69           | CD69 molecule                                               | ENST00000228434 | -1,13132376  |
| A_23_P164773   | NM_002002       | FCER2          | Fc fragment of IgE, low affinity II, receptor for (CD23)    | ENST00000346664 | -1,13139047  |
| A_23_P87879    | NM_001781       | CD69           | CD69 molecule                                               | ENST00000228434 | -1,131805389 |
| A_23_P24493    | NM_002424       | MMP8           | matrix metalloproteinase 8 (neutrophil collagenase)         | ENST00000528662 | -1,132250509 |
| A_23_P87879    | NM_001781       | CD69           | CD69 molecule                                               | ENST00000228434 | -1,133917375 |
| A_23_P62647    | NM_003037       | SLAMF1         | signaling lymphocytic activation molecule family member 1   | ENST00000392208 | -1,134042734 |
| A_23_P51085    | NM_020675       | SPC25          | SPC25, NDC80 kinetochore complex component, homolog (       | ENST00000282074 | -1,135218672 |
| A_33_P3692979  | AK093862        | LOC283485      | uncharacterized LOC283485                                   |                 | -1,137825437 |
| A_23_P87879    | NM_001781       | CD69           | CD69 molecule                                               | ENST00000228434 | -1,138143655 |



|               |                  |                |                                                              |                 |              |
|---------------|------------------|----------------|--------------------------------------------------------------|-----------------|--------------|
| A_32_P151800  | NM_207418        | FAM72D         | family with sequence similarity 72, member D                 | ENST00000341209 | -1,140429199 |
| A_21_P0006605 | TCONS_00017645   | XLOC_008317    |                                                              |                 | -1,142181657 |
| A_24_P49199   | NM_181789        | GLDN           | gliomedin                                                    | ENST00000396399 | -1,143112604 |
| A_23_P206359  | NM_004360        | CDH1           | cadherin 1, type 1, E-cadherin (epithelial)                  | ENST00000261769 | -1,143632953 |
| A_32_P71571   | NM_182522        | FAM19A4        | family with sequence similarity 19 (chemokine (C-C motif)-li | ENST00000295569 | -1,14629693  |
| A_23_P121564  | NM_000857        | GUCY1B3        | guanylate cyclase 1, soluble, beta 3                         | ENST00000264424 | -1,151127667 |
| A_32_P44394   | NM_004833        | AIM2           | absent in melanoma 2                                         | ENST00000368130 | -1,151452954 |
| A_21_P0012418 | TCONS_I2_0001904 | XLOC_I2_010029 |                                                              |                 | -1,154902006 |
| A_24_P112941  | NM_032808        | LINGO1         | leucine rich repeat and Ig domain containing 1               | ENST00000355300 | -1,155375491 |
| A_23_P386478  | NM_024873        | TNIP3          | TNFAIP3 interacting protein 3                                | ENST00000511909 | -1,155783416 |
| A_33_P3313617 | NR_003133        | GBP1P1         | guanylate binding protein 1, interferon-inducible pseudogen  | ENST00000513638 | -1,158165534 |
| A_23_P87879   | NM_001781        | CD69           | CD69 molecule                                                | ENST00000228434 | -1,159355377 |
| A_23_P6263    | NM_002463        | MX2            | myxovirus (influenza virus) resistance 2 (mouse)             | ENST00000330714 | -1,159881117 |
| A_33_P3284933 | NM_145659        | IL27           | interleukin 27                                               | ENST00000356897 | -1,160155802 |
| A_23_P167328  | NM_001775        | CD38           | CD38 molecule                                                | ENST00000540195 | -1,162524582 |
| A_33_P3399090 | NM_001037954     | DIXDC1         | DIX domain containing 1                                      | ENST00000440460 | -1,163520342 |
| A_33_P3319925 | ENST00000449753  | IRG1           | immunoresponsive 1 homolog (mouse)                           | ENST00000449753 | -1,168466181 |
| A_33_P3415052 | NM_001172292     | NIPAL4         | NIPA-like domain containing 4                                |                 | -1,171771224 |
| A_23_P112026  | NM_002164        | IDO1           | indoleamine 2,3-dioxygenase 1                                | ENST00000523779 | -1,171947478 |
| A_23_P64617   | NM_012193        | FZD4           | frizzled family receptor 4                                   | ENST00000531380 | -1,172504167 |
| A_21_P0000832 | NR_038907        | LOC100507300   | uncharacterized LOC100507300                                 | ENST00000499194 | -1,172992479 |
| A_23_P36397   | NM_000785        | CYP27B1        | cytochrome P450, family 27, subfamily B, polypeptide 1       | ENST00000228606 | -1,174899992 |
| A_24_P278126  | NM_002485        | NBN            | nibrin                                                       | ENST00000396252 | -1,175021952 |
| A_24_P295010  | NM_004155        | SERPINB9       | serpin peptidase inhibitor, clade B (ovalbumin), member 9    | ENST00000380698 | -1,175485497 |
| A_23_P112026  | NM_002164        | IDO1           | indoleamine 2,3-dioxygenase 1                                | ENST00000523779 | -1,175487176 |
| A_21_P0010536 | NM_018284        | GBP3           | guanylate binding protein 3                                  | ENST00000461384 | -1,175595919 |
| A_23_P87879   | NM_001781        | CD69           | CD69 molecule                                                | ENST00000228434 | -1,176224045 |
| A_23_P112026  | NM_002164        | IDO1           | indoleamine 2,3-dioxygenase 1                                | ENST00000523779 | -1,178794462 |
| A_33_P3228460 | NM_001136007     | FXYD3          | FXYD domain containing ion transport regulator 3             | ENST00000535103 | -1,179445837 |

|               |                  |                |                                                           |                 |              |
|---------------|------------------|----------------|-----------------------------------------------------------|-----------------|--------------|
| A_23_P112026  | NM_002164        | IDO1           | indoleamine 2,3-dioxygenase 1                             | ENST00000523779 | -1,181512749 |
| A_23_P112026  | NM_002164        | IDO1           | indoleamine 2,3-dioxygenase 1                             | ENST00000523779 | -1,181915702 |
| A_23_P17065   | NM_004591        | CCL20          | chemokine (C-C motif) ligand 20                           | ENST00000473642 | -1,183093086 |
| A_33_P3258392 | NM_001955        | EDN1           | endothelin 1                                              | ENST00000379375 | -1,184448902 |
| A_33_P3352098 | NM_021201        | MS4A7          | membrane-spanning 4-domains, subfamily A, member 7        | ENST00000358246 | -1,186364942 |
| A_23_P132159  | NM_017414        | USP18          | ubiquitin specific peptidase 18                           | ENST00000215794 | -1,186706618 |
| A_23_P77043   | NM_024764        | CATSPERB       | cation channel, sperm-associated, beta                    | ENST00000256343 | -1,187037104 |
| A_21_P0014592 | XR_110434        | LOC100507575   | uncharacterized LOC100507575                              |                 | -1,187151143 |
| A_21_P0008613 | THC2662357       | XLOC_011213    |                                                           |                 | -1,193195379 |
| A_21_P0013057 | TCONS_I2_0002457 | XLOC_I2_012847 |                                                           |                 | -1,193215372 |
| A_24_P389916  | NM_005512        | LRRC32         | leucine rich repeat containing 32                         | ENST00000404995 | -1,195065563 |
| A_33_P3380383 | NM_001099221     | TIFAB          | TRAF-interacting protein with forkhead-associated domain, | ENST00000537858 | -1,195675914 |
| A_33_P3329013 | NM_001050        | SSTR2          | somatostatin receptor 2                                   | ENST00000315332 | -1,202221078 |
| A_23_P112026  | NM_002164        | IDO1           | indoleamine 2,3-dioxygenase 1                             | ENST00000523779 | -1,204111914 |
| A_24_P225616  | NM_001034        | RRM2           | ribonucleotide reductase M2                               | ENST00000304567 | -1,206712448 |
| A_23_P112026  | NM_002164        | IDO1           | indoleamine 2,3-dioxygenase 1                             | ENST00000523779 | -1,210153627 |
| A_24_P105391  | NM_001017922     | ERMAP          | erythroblast membrane-associated protein (Scianna blood § | ENST00000372517 | -1,210581594 |
| A_23_P112026  | NM_002164        | IDO1           | indoleamine 2,3-dioxygenase 1                             | ENST00000523779 | -1,211650882 |
| A_24_P23625   | ENST00000360954  | HS3ST3B1       | heparan sulfate (glucosamine) 3-O-sulfotransferase 3B1    | ENST00000360954 | -1,212935485 |
| A_23_P112026  | NM_002164        | IDO1           | indoleamine 2,3-dioxygenase 1                             | ENST00000523779 | -1,213916799 |
| A_23_P62890   | NM_002053        | GBP1           | guanylate binding protein 1, interferon-inducible         | ENST00000370473 | -1,215364819 |
| A_33_P3381671 | BC016366         | LOC731424      | uncharacterized LOC731424                                 |                 | -1,217994704 |
| A_21_P0003821 | TCONS_00008716   | XLOC_004229    |                                                           |                 | -1,22333273  |
| A_21_P0010261 | THC2775863       | XLOC_013968    |                                                           |                 | -1,223754051 |
| A_23_P17481   | NM_023068        | SIGLEC1        | sialic acid binding Ig-like lectin 1, sialoadhesin        | ENST00000202578 | -1,224130072 |
| A_23_P82868   | NM_000930        | PLAT           | plasminogen activator, tissue                             | ENST00000352041 | -1,225071593 |
| A_23_P336612  | NM_173528        | C15orf26       | chromosome 15 open reading frame 26                       | ENST00000286732 | -1,232572448 |
| A_23_P112026  | NM_002164        | IDO1           | indoleamine 2,3-dioxygenase 1                             | ENST00000523779 | -1,23889542  |
| A_23_P145724  | NM_006658        | PPP1R17        | protein phosphatase 1, regulatory subunit 17              | ENST00000342032 | -1,244652129 |

|               |                                 |           |                                                                |                 |              |
|---------------|---------------------------------|-----------|----------------------------------------------------------------|-----------------|--------------|
| A_23_P150316  | NM_002426                       | MMP12     | matrix metalloproteinase 12 (macrophage elastase)              |                 | -1,245570316 |
| A_21_P0010537 | TCONS_I2_0000039(XLOC_I2_000297 |           |                                                                |                 | -1,245698563 |
| A_33_P3291484 | NM_005668                       | ST8SIA4   | ST8 alpha-N-acetyl-neuraminide alpha-2,8-sialyltransferase 4   |                 | -1,249129376 |
| A_33_P3258046 | NM_170685                       | TAC4      | tachykinin 4 (hemokinin)                                       | ENST00000334568 | -1,251547572 |
| A_23_P358917  | NM_000765                       | CYP3A7    | cytochrome P450, family 3, subfamily A, polypeptide 7          | ENST00000336374 | -1,252164298 |
| A_32_P9543    | NM_145699                       | APOBEC3A  | apolipoprotein B mRNA editing enzyme, catalytic polypeptide    | ENST00000402255 | -1,253463376 |
| A_23_P87879   | NM_001781                       | CD69      | CD69 molecule                                                  | ENST00000228434 | -1,262598637 |
| A_23_P82868   | NM_000930                       | PLAT      | plasminogen activator, tissue                                  | ENST00000352041 | -1,267876287 |
| A_23_P125680  | NM_017938                       | FAM70A    | family with sequence similarity 70, member A                   | ENST00000440464 | -1,268298408 |
| A_23_P87879   | NM_001781                       | CD69      | CD69 molecule                                                  | ENST00000228434 | -1,268976274 |
| A_33_P3705884 | AK094188                        | LOC148189 | uncharacterized LOC148189                                      |                 | -1,273976188 |
| A_32_P74409   | NM_001145033                    | C11orf96  | chromosome 11 open reading frame 96                            | ENST00000528572 | -1,288874346 |
| A_33_P3364488 | NM_001170631                    | FCAMR     | Fc receptor, IgA, IgM, high affinity                           | ENST00000450945 | -1,301775354 |
| A_33_P3316539 | NM_001008539                    | SLC7A2    | solute carrier family 7 (cationic amino acid transporter, y+ s | ENST00000004531 | -1,314778893 |
| A_23_P82868   | NM_000930                       | PLAT      | plasminogen activator, tissue                                  | ENST00000352041 | -1,322396693 |
| A_33_P3239282 | NM_004974                       | KCNA2     | potassium voltage-gated channel, shaker-related subfamily,     | ENST00000316361 | -1,326923862 |
| A_23_P214821  | NM_001955                       | EDN1      | endothelin 1                                                   | ENST00000379375 | -1,329944545 |
| A_23_P121106  | NM_003865                       | HESX1     | HESX homeobox 1                                                | ENST00000295934 | -1,330392295 |
| A_23_P206359  | NM_004360                       | CDH1      | cadherin 1, type 1, E-cadherin (epithelial)                    | ENST00000261769 | -1,335232529 |
| A_24_P323598  | NM_001017420                    | ESCO2     | establishment of cohesion 1 homolog 2 (S. cerevisiae)          | ENST00000305188 | -1,337173679 |
| A_23_P214821  | NM_001955                       | EDN1      | endothelin 1                                                   | ENST00000379375 | -1,339323279 |
| A_32_P101031  | NM_144586                       | LYPD1     | LY6/PLAUR domain containing 1                                  | ENST00000397463 | -1,33940764  |
| A_23_P82868   | NM_000930                       | PLAT      | plasminogen activator, tissue                                  | ENST00000352041 | -1,340863208 |
| A_23_P204087  | NM_016817                       | OAS2      | 2'-5'-oligoadenylate synthetase 2, 69/71kDa                    | ENST00000392583 | -1,348416678 |
| A_23_P214821  | NM_001955                       | EDN1      | endothelin 1                                                   | ENST00000379375 | -1,349726366 |
| A_23_P121106  | NM_003865                       | HESX1     | HESX homeobox 1                                                | ENST00000295934 | -1,350904374 |
| A_33_P3281283 | NM_005226                       | S1PR3     | sphingosine-1-phosphate receptor 3                             | ENST00000375846 | -1,355035072 |
| A_23_P139786  | NM_003733                       | OASL      | 2'-5'-oligoadenylate synthetase-like                           | ENST00000257570 | -1,37167479  |
| A_23_P132057  | NR_024027                       | LINC00158 | long intergenic non-protein coding RNA 158                     |                 | -1,382221943 |

|                |            |               |                                                             |                 |              |
|----------------|------------|---------------|-------------------------------------------------------------|-----------------|--------------|
| A_23_P82868    | NM_000930  | PLAT          | plasminogen activator, tissue                               | ENST00000352041 | -1,385862394 |
| A_23_P121106   | NM_003865  | HESX1         | HESX homeobox 1                                             | ENST00000295934 | -1,390230869 |
| A_23_P82868    | NM_000930  | PLAT          | plasminogen activator, tissue                               | ENST00000352041 | -1,390278222 |
| A_23_P214821   | NM_001955  | EDN1          | endothelin 1                                                | ENST00000379375 | -1,397932204 |
| A_23_P214821   | NM_001955  | EDN1          | endothelin 1                                                | ENST00000379375 | -1,400993641 |
| A_33_P3418170  | NM_014314  | DDX58         | DEAD (Asp-Glu-Ala-Asp) box polypeptide 58                   | ENST00000379882 | -1,402585315 |
| A_23_P85240    | NM_016562  | TLR7          | toll-like receptor 7                                        | ENST00000380659 | -1,404298837 |
| A_24_P12690    | NM_194294  | IDO2          | indoleamine 2,3-dioxygenase 2                               | ENST00000343295 | -1,4074011   |
| A_23_P214821   | NM_001955  | EDN1          | endothelin 1                                                | ENST00000379375 | -1,409028484 |
| A_23_P214821   | NM_001955  | EDN1          | endothelin 1                                                | ENST00000379375 | -1,409073727 |
| A_23_P79518    | NM_000576  | IL1B          | interleukin 1, beta                                         | ENST00000263341 | -1,409168306 |
| A_23_P79518    | NM_000576  | IL1B          | interleukin 1, beta                                         | ENST00000263341 | -1,414115904 |
| A_24_P759477   | NM_002214  | ITGB8         | integrin, beta 8                                            |                 | -1,41564     |
| A_23_P82868    | NM_000930  | PLAT          | plasminogen activator, tissue                               | ENST00000352041 | -1,416655933 |
| A_33_P3567892  | AL050263   | DKFZP547J0410 | DKFZP547J0410 protein                                       |                 | -1,417860067 |
| A_23_P82868    | NM_000930  | PLAT          | plasminogen activator, tissue                               | ENST00000352041 | -1,423678189 |
| A_23_P214821   | NM_001955  | EDN1          | endothelin 1                                                | ENST00000379375 | -1,426771178 |
| A_23_P79518    | NM_000576  | IL1B          | interleukin 1, beta                                         | ENST00000263341 | -1,430932508 |
| A_23_P82868    | NM_000930  | PLAT          | plasminogen activator, tissue                               | ENST00000352041 | -1,431352475 |
| A_23_P214821   | NM_001955  | EDN1          | endothelin 1                                                | ENST00000379375 | -1,432331658 |
| A_23_P79518    | NM_000576  | IL1B          | interleukin 1, beta                                         | ENST00000263341 | -1,436030075 |
| A_19_P00812190 | THC2520127 | Q5D1D6        |                                                             |                 | -1,439729065 |
| A_23_P79518    | NM_000576  | IL1B          | interleukin 1, beta                                         | ENST00000263341 | -1,441003518 |
| A_23_P79518    | NM_000576  | IL1B          | interleukin 1, beta                                         | ENST00000263341 | -1,442161587 |
| A_23_P79518    | NM_000576  | IL1B          | interleukin 1, beta                                         | ENST00000263341 | -1,450293438 |
| A_23_P214821   | NM_001955  | EDN1          | endothelin 1                                                | ENST00000379375 | -1,454636308 |
| A_23_P79518    | NM_000576  | IL1B          | interleukin 1, beta                                         | ENST00000263341 | -1,456373982 |
| A_33_P3283611  | NM_001549  | IFIT3         | interferon-induced protein with tetratricopeptide repeats 3 | ENST00000543062 | -1,456871651 |
| A_23_P79518    | NM_000576  | IL1B          | interleukin 1, beta                                         | ENST00000263341 | -1,459559456 |

|                |                 |             |                                                             |                 |              |
|----------------|-----------------|-------------|-------------------------------------------------------------|-----------------|--------------|
| A_33_P3407013  | ENST00000420258 | IL6         | interleukin 6 (interferon, beta 2)                          | ENST00000420258 | -1,469622729 |
| A_21_P0001988  | ENST00000433724 | XLOC_001932 |                                                             | ENST00000433724 | -1,472609538 |
| A_19_P00808588 | NR_003133       | GBP1P1      |                                                             | ENST00000513638 | -1,474434279 |
| A_23_P79518    | NM_000576       | IL1B        | interleukin 1, beta                                         | ENST00000263341 | -1,475806531 |
| A_23_P121253   | NM_003810       | TNFSF10     | tumor necrosis factor (ligand) superfamily, member 10       | ENST00000241261 | -1,484111606 |
| A_23_P71037    | NM_000600       | IL6         | interleukin 6 (interferon, beta 2)                          | ENST00000485300 | -1,485988671 |
| A_23_P29773    | NM_014398       | LAMP3       | lysosomal-associated membrane protein 3                     | ENST00000265598 | -1,497369157 |
| A_24_P304071   | NM_001547       | IFIT2       | interferon-induced protein with tetratricopeptide repeats 2 | ENST00000371826 | -1,506475936 |
| A_23_P207456   | NM_005623       | CCL8        | chemokine (C-C motif) ligand 8                              | ENST00000225840 | -1,509316407 |
| A_23_P121253   | NM_003810       | TNFSF10     | tumor necrosis factor (ligand) superfamily, member 10       | ENST00000241261 | -1,511790219 |
| A_23_P121253   | NM_003810       | TNFSF10     | tumor necrosis factor (ligand) superfamily, member 10       | ENST00000241261 | -1,514566394 |
| A_23_P76078    | NM_016584       | IL23A       | interleukin 23, alpha subunit p19                           | ENST00000228534 | -1,525502516 |
| A_23_P121253   | NM_003810       | TNFSF10     | tumor necrosis factor (ligand) superfamily, member 10       | ENST00000241261 | -1,530514879 |
| A_21_P0000695  | NR_037867       | LOC731424   | uncharacterized LOC731424                                   |                 | -1,531193866 |
| A_23_P82868    | NM_000930       | PLAT        | plasminogen activator, tissue                               | ENST00000352041 | -1,537320232 |
| A_23_P24004    | NM_001547       | IFIT2       | interferon-induced protein with tetratricopeptide repeats 2 | ENST00000371826 | -1,561579859 |
| A_33_P3401826  | NM_207315       | CMPK2       | cytidine monophosphate (UMP-CMP) kinase 2, mitochondri      | ENST00000478738 | -1,564450451 |
| A_23_P121253   | NM_003810       | TNFSF10     | tumor necrosis factor (ligand) superfamily, member 10       | ENST00000241261 | -1,580567697 |
| A_23_P121253   | NM_003810       | TNFSF10     | tumor necrosis factor (ligand) superfamily, member 10       | ENST00000241261 | -1,586852772 |
| A_23_P121253   | NM_003810       | TNFSF10     | tumor necrosis factor (ligand) superfamily, member 10       | ENST00000241261 | -1,59226383  |
| A_24_P250922   | NM_000963       | PTGS2       | prostaglandin-endoperoxide synthase 2 (prostaglandin G/H    | ENST00000490885 | -1,594562403 |
| A_24_P124624   | NM_002543       | OLR1        | oxidized low density lipoprotein (lectin-like) receptor 1   | ENST00000309539 | -1,595966747 |
| A_23_P121106   | NM_003865       | HESX1       | HESX homeobox 1                                             | ENST00000295934 | -1,597122451 |
| A_23_P121106   | NM_003865       | HESX1       | HESX homeobox 1                                             | ENST00000295934 | -1,599730274 |
| A_24_P250922   | NM_000963       | PTGS2       | prostaglandin-endoperoxide synthase 2 (prostaglandin G/H    | ENST00000490885 | -1,600596163 |
| A_23_P121106   | NM_003865       | HESX1       | HESX homeobox 1                                             | ENST00000295934 | -1,604884027 |
| A_23_P121253   | NM_003810       | TNFSF10     | tumor necrosis factor (ligand) superfamily, member 10       | ENST00000241261 | -1,608764662 |
| A_23_P121106   | NM_003865       | HESX1       | HESX homeobox 1                                             | ENST00000295934 | -1,612962837 |
| A_24_P411186   | NM_022893       | BCL11A      | B-cell CLL/lymphoma 11A (zinc finger protein)               | ENST00000335712 | -1,616100963 |



|               |           |         |                                                          |                 |              |
|---------------|-----------|---------|----------------------------------------------------------|-----------------|--------------|
| A_23_P121253  | NM_003810 | TNFSF10 | tumor necrosis factor (ligand) superfamily, member 10    | ENST00000241261 | -1,61880142  |
| A_24_P250922  | NM_000963 | PTGS2   | prostaglandin-endoperoxide synthase 2 (prostaglandin G/H | ENST00000490885 | -1,621364602 |
| A_24_P250922  | NM_000963 | PTGS2   | prostaglandin-endoperoxide synthase 2 (prostaglandin G/H | ENST00000490885 | -1,621485682 |
| A_33_P3343175 | NM_001565 | CXCL10  | chemokine (C-X-C motif) ligand 10                        | ENST00000306602 | -1,623621685 |
| A_23_P49759   | NM_002981 | CCL1    | chemokine (C-C motif) ligand 1                           | ENST00000225842 | -1,626525486 |
| A_23_P121106  | NM_003865 | HESX1   | HESX homeobox 1                                          | ENST00000295934 | -1,630726415 |
| A_33_P3226810 | NM_003810 | TNFSF10 | tumor necrosis factor (ligand) superfamily, member 10    | ENST00000241261 | -1,638706156 |
| A_24_P250922  | NM_000963 | PTGS2   | prostaglandin-endoperoxide synthase 2 (prostaglandin G/H | ENST00000490885 | -1,645930639 |
| A_23_P35092   | NM_153758 | IL19    | interleukin 19                                           | ENST00000270218 | -1,64885999  |
| A_23_P121106  | NM_003865 | HESX1   | HESX homeobox 1                                          | ENST00000295934 | -1,654841894 |
| A_23_P121253  | NM_003810 | TNFSF10 | tumor necrosis factor (ligand) superfamily, member 10    | ENST00000241261 | -1,654929125 |
| A_24_P250922  | NM_000963 | PTGS2   | prostaglandin-endoperoxide synthase 2 (prostaglandin G/H | ENST00000490885 | -1,655773519 |
| A_23_P72096   | NM_000575 | IL1A    | interleukin 1, alpha                                     | ENST00000263339 | -1,657883859 |
| A_23_P72096   | NM_000575 | IL1A    | interleukin 1, alpha                                     | ENST00000263339 | -1,667630242 |
| A_23_P72096   | NM_000575 | IL1A    | interleukin 1, alpha                                     | ENST00000263339 | -1,667775107 |
| A_23_P72096   | NM_000575 | IL1A    | interleukin 1, alpha                                     | ENST00000263339 | -1,668010385 |
| A_24_P28722   | NM_080657 | RSAD2   | radical S-adenosyl methionine domain containing 2        | ENST00000382040 | -1,677163523 |
| A_23_P72096   | NM_000575 | IL1A    | interleukin 1, alpha                                     | ENST00000263339 | -1,684217366 |
| A_23_P72096   | NM_000575 | IL1A    | interleukin 1, alpha                                     | ENST00000263339 | -1,686659896 |
| A_24_P250922  | NM_000963 | PTGS2   | prostaglandin-endoperoxide synthase 2 (prostaglandin G/H | ENST00000490885 | -1,688477266 |
| A_24_P250922  | NM_000963 | PTGS2   | prostaglandin-endoperoxide synthase 2 (prostaglandin G/H | ENST00000490885 | -1,70137177  |
| A_23_P72096   | NM_000575 | IL1A    | interleukin 1, alpha                                     | ENST00000263339 | -1,702646995 |
| A_23_P72096   | NM_000575 | IL1A    | interleukin 1, alpha                                     | ENST00000263339 | -1,706156231 |
| A_24_P250922  | NM_000963 | PTGS2   | prostaglandin-endoperoxide synthase 2 (prostaglandin G/H | ENST00000490885 | -1,707836078 |
| A_24_P250922  | NM_000963 | PTGS2   | prostaglandin-endoperoxide synthase 2 (prostaglandin G/H | ENST00000490885 | -1,710360792 |
| A_23_P121106  | NM_003865 | HESX1   | HESX homeobox 1                                          | ENST00000295934 | -1,716233861 |
| A_23_P72096   | NM_000575 | IL1A    | interleukin 1, alpha                                     | ENST00000263339 | -1,721562067 |
| A_23_P45871   | NM_006820 | IFI44L  | interferon-induced protein 44-like                       | ENST00000476521 | -1,735501742 |
| A_23_P72096   | NM_000575 | IL1A    | interleukin 1, alpha                                     | ENST00000263339 | -1,744957251 |

|               |           |        |                                                                                                      |                 |              |
|---------------|-----------|--------|------------------------------------------------------------------------------------------------------|-----------------|--------------|
| A_23_P8801    | NM_000777 | CYP3A5 | cytochrome P450, family 3, subfamily A, polypeptide 5                                                | ENST00000339843 | -1,753092942 |
| A_23_P55649   | NM_001462 | FPR2   | formyl peptide receptor 2                                                                            | ENST00000340023 | -1,76210978  |
| A_33_P3341499 | NM_003392 | WNT5A  | wingless-type MMTV integration site family, member 5A                                                | ENST00000264634 | -1,76413464  |
| A_23_P125278  | NM_005409 | CXCL11 | chemokine (C-X-C motif) ligand 11                                                                    | ENST00000306621 | -1,772367937 |
| A_23_P7560    | NM_002187 | IL12B  | interleukin 12B (natural killer cell stimulatory factor 2, cytotoxic T lymphocyte chemoattractant 1) | ENST00000231228 | -2,372510853 |

Comparison of gene expression profiling between WR-infected macrophages

| ProbeName     | SystematicName  | GeneSymbol  | GeneName                                           | EnsemblID       | WR vs<br>MØ_logFC |
|---------------|-----------------|-------------|----------------------------------------------------|-----------------|-------------------|
| A_21_P0000504 | NR_023344       | RNU6ATAC    | RNA, U6atac small nuclear (U12-dependent splicing) |                 | 2,618988907       |
| A_21_P0000513 | NR_026703       | VTRNA1-1    | vault RNA 1-1                                      |                 | 2,472989452       |
| A_33_P3279708 | NR_002761       | RNU2-2      | RNA, U2 small nuclear 2                            | ENST00000538098 | 2,352770607       |
| A_33_P3390107 | NR_003286       | RN18S1      | RNA, 18S ribosomal 1                               |                 | 2,326590199       |
| A_21_P0000514 | NR_026704       | VTRNA1-2    | vault RNA 1-2                                      |                 | 2,278312886       |
| A_33_P3273584 | NR_003023       | SCARNA2     | small Cajal body-specific RNA 2                    |                 | 2,200446035       |
| A_23_P388871  | NM_175054       | HIST4H4     | histone cluster 4, H4                              | ENST00000539745 | 2,172417167       |
| A_23_P359540  | NM_003540       | HIST1H4F    | histone cluster 1, H4f                             | ENST00000377745 | 1,953446628       |
| A_21_P0000584 | NR_030583       | VTRNA2-1    | vault RNA 2-1                                      |                 | 1,918563111       |
| A_21_P0000515 | NR_026705       | VTRNA1-3    | vault RNA 1-3                                      |                 | 1,891038152       |
| A_33_P3351851 | NM_003546       | HIST1H4L    | histone cluster 1, H4l                             | ENST00000355981 | 1,875602174       |
| A_23_P363936  | NM_014278       | HSPA4L      | heat shock 70kDa protein 4-like                    | ENST00000296464 | 1,871830848       |
| A_33_P3420259 | NR_003287       | RN28S1      | RNA, 28S ribosomal 1                               |                 | 1,817324318       |
| A_21_P0000392 | NR_003076       | SNORD98     | small nucleolar RNA, C/D box 98                    | ENST00000483264 | 1,791321289       |
| A_33_P3410836 | NM_003539       | HIST1H4D    | histone cluster 1, H4d                             | ENST00000340756 | 1,78622024        |
| A_33_P3336632 | NR_003287       | RN28S1      | RNA, 28S ribosomal 1                               |                 | 1,780498419       |
| A_23_P30805   | NM_021968       | HIST1H4J    | histone cluster 1, H4j                             | ENST00000355057 | 1,770786354       |
| A_33_P3332348 | NR_002715       | RN7SL1      | RNA, 7SL, cytoplasmic 1                            | ENST00000553637 | 1,757945455       |
| A_23_P436281  | NM_001034077    | HIST2H4B    | histone cluster 2, H4b                             | ENST00000392933 | 1,754156751       |
| A_21_P0004617 | ENST00000430078 | XLOC_005900 |                                                    | ENST00000430078 | 1,73505632        |
| A_33_P3389394 | NR_002312       | RPPH1       | ribonuclease P RNA component H1                    | ENST00000554988 | 1,729709156       |
| A_23_P431179  | NM_003538       | HIST1H4A    | histone cluster 1, H4a                             | ENST00000359907 | 1,697036529       |
| A_33_P3267263 | NR_004400       | RNU1-5      | RNA, U1 small nuclear 5                            |                 | 1,670786021       |
| A_21_P0000487 | NR_004378       | SNORD94     | small nucleolar RNA, C/D box 94                    |                 | 1,645550691       |
| A_23_P30813   | NM_003541       | HIST1H4K    | histone cluster 1, H4k                             | ENST00000357549 | 1,630001782       |
| A_24_P20873   | NM_003495       | HIST1H4I    | histone cluster 1, H4i                             | ENST00000354348 | 1,628015485       |

|                |                 |                |                                                   |                 |             |
|----------------|-----------------|----------------|---------------------------------------------------|-----------------|-------------|
| A_33_P3299865  | NM_003541       | HIST1H4K       | histone cluster 1, H4k                            | ENST00000355057 | 1,615772818 |
| A_23_P323685   | NM_003543       | HIST1H4H       | histone cluster 1, H4h                            | ENST00000377727 | 1,59850119  |
| A_33_P3327519  | NR_002915       | SNORA74A       | small nucleolar RNA, H/ACA box 74A                |                 | 1,547362762 |
| A_19_P00315502 | ENST00000417112 | P01115         |                                                   | ENST00000417112 | 1,535212927 |
| A_33_P3357759  | XM_291007       | HEATR7B1       | HEAT repeat containing 7B1                        | ENST00000389758 | 1,494738007 |
| A_21_P0014066  | XR_108328       | LOC100506636   | uncharacterized LOC100506636                      |                 | 1,490147129 |
| A_33_P3359791  | ENST00000484389 | TDRD3          | tudor domain containing 3                         | ENST00000484389 | 1,489015154 |
| A_33_P3404989  | NM_003536       | HIST1H3H       | histone cluster 1, H3h                            | ENST00000369163 | 1,480902905 |
| A_33_P3344229  | NM_003538       | HIST1H4A       | histone cluster 1, H4a                            | ENST00000359907 | 1,476754897 |
| A_33_P3323463  | ENST00000532091 | HSPA8          | heat shock 70kDa protein 8                        | ENST00000532091 | 1,434390276 |
| A_24_P608302   | BC012894        | LOC388796      | uncharacterized LOC388796                         |                 | 1,43347424  |
| A_21_P0000338  | NR_002984       | SNORA56        | small nucleolar RNA, H/ACA box 56                 | ENST00000481062 | 1,420614859 |
| A_33_P3291614  | XR_110031       | LOC100133039   | uncharacterized LOC100133039                      |                 | 1,418195639 |
| A_21_P0000283  | NR_002741       | SNORD53        | small nucleolar RNA, C/D box 53                   |                 | 1,403570371 |
| A_21_P0000023  | NM_001159749    | RIOK2          | RIO kinase 2 (yeast)                              | ENST00000508447 | 1,395744861 |
| A_21_P0010928  | ENST00000429110 | XLOC_I2_001731 |                                                   | ENST00000429110 | 1,384915755 |
| A_24_P348203   | NM_025061       | LRRRC8E        | leucine rich repeat containing 8 family, member E | ENST00000306708 | 1,375195027 |
| A_24_P67898    | ENST00000370094 | MGEA5          | meningioma expressed antigen 5 (hyaluronidase)    | ENST00000370094 | 1,374430258 |
| A_33_P3242383  | ENST00000504956 | AFF1           | AF4/FMR2 family, member 1                         | ENST00000504956 | 1,372411464 |
| A_21_P0000371  | NR_003037       | SNORD7         | small nucleolar RNA, C/D box 7                    |                 | 1,371427692 |
| A_23_P28598    | NM_004405       | DLX2           | distal-less homeobox 2                            | ENST00000234198 | 1,362263167 |
| A_23_P48698    | NM_003814       | ADAM20         | ADAM metallopeptidase domain 20                   | ENST00000256389 | 1,362249049 |
| A_33_P3305521  | AB029007        | ZNF507         | zinc finger protein 507                           |                 | 1,358137879 |
| A_23_P164451   | NM_005994       | TBX2           | T-box 2                                           | ENST00000477081 | 1,349840559 |
| A_23_P407080   | NM_173489       | HEATR7B2       | HEAT repeat family member 7B2                     | ENST00000399564 | 1,347681462 |
| A_33_P3243307  | AK128353        | LOC100128281   | uncharacterized LOC100128281                      |                 | 1,341201027 |
| A_33_P3405888  | AF130105        | LOC100133130   | PRO1102                                           |                 | 1,340987256 |
| A_33_P3346688  | ENST00000527983 | HSPA8          | heat shock 70kDa protein 8                        | ENST00000527983 | 1,331878717 |
| A_33_P3238455  | NR_034009       | SRSF6          | serine/arginine-rich splicing factor 6            | ENST00000483871 | 1,32725712  |

|               |                 |                |                                                              |                 |             |
|---------------|-----------------|----------------|--------------------------------------------------------------|-----------------|-------------|
| A_33_P3269203 | NM_001207014    | SERPINH1       | serpin peptidase inhibitor, clade H (heat shock protein 47), | ENST00000524558 | 1,323013468 |
| A_33_P3336113 | NM_145719       | TIGD3          | tigger transposable element derived 3                        | ENST00000309880 | 1,322642103 |
| A_33_P3325723 | NM_001822       | CHN1           | chimerin (chimaerin) 1                                       | ENST00000492964 | 1,321737741 |
| A_33_P3328621 | BC036435        | LOC100132147   | uncharacterized LOC100132147                                 | ENST00000453554 | 1,320244473 |
| A_33_P3356371 | AK127766        | LOC100133089   | uncharacterized LOC100133089                                 |                 | 1,316060014 |
| A_23_P27649   | NM_001080411    | ZNF433         | zinc finger protein 433                                      | ENST00000344980 | 1,308671365 |
| A_33_P3400699 | NM_206883       | SLC26A5        | solute carrier family 26, member 5 (prestin)                 | ENST00000339444 | 1,304972618 |
| A_21_P0000247 | NR_002443       | SNORD18C       | small nucleolar RNA, C/D box 18C                             |                 | 1,303061346 |
| A_21_P0014006 | XM_003403443    | LOC100509263   | uncharacterized LOC100509263                                 |                 | 1,299713835 |
| A_33_P3266719 | NM_017628       | TET2           | tet methylcytosine dioxygenase 2                             | ENST00000535110 | 1,29953314  |
| A_21_P0000372 | NR_003042       | SNORD45C       | small nucleolar RNA, C/D box 45C                             | ENST00000471759 | 1,29566451  |
| A_33_P3243399 | ENST00000467901 | SLMAP          | sarcolemma associated protein                                | ENST00000467901 | 1,287647319 |
| A_23_P90062   | NM_006145       | DNAJB1         | DnaJ (Hsp40) homolog, subfamily B, member 1                  | ENST00000254322 | 1,269912278 |
| A_23_P88119   | NM_006644       | HSPH1          | heat shock 105kDa/110kDa protein 1                           | ENST00000320027 | 1,266666808 |
| A_33_P3710442 | AK021772        | FLJ11710       | uncharacterized protein FLJ11710                             |                 | 1,265346128 |
| A_24_P50818   | NM_001206774    | GTF3C3         | general transcription factor IIIC, polypeptide 3, 102kDa     | ENST00000409364 | 1,259680032 |
| A_32_P205944  | NM_005054       | RGPD5          | RANBP2-like and GRIP domain containing 5                     | ENST00000302558 | 1,256880977 |
| A_21_P0014824 | NR_045370       | LOC100505815   | uncharacterized LOC100505815                                 |                 | 1,255957624 |
| A_33_P3228642 | ENST00000322834 | ZNF584         | zinc finger protein 584                                      | ENST00000322834 | 1,247965823 |
| A_33_P3274622 | NR_029401       | LOC731275      | uncharacterized LOC731275                                    | ENST00000417964 | 1,247910975 |
| A_21_P0000492 | NR_004384       | SNAR-F         | small ILF3/NF90-associated RNA F                             |                 | 1,245725054 |
| A_23_P341700  | NM_001007101    | ZNF484         | zinc finger protein 484                                      | ENST00000375495 | 1,243592079 |
| A_21_P0012995 | AL049987        | XLOC_l2_012083 |                                                              |                 | 1,224721704 |
| A_33_P3587376 | NR_024214       | SNAR-A3        | small ILF3/NF90-associated RNA A3                            |                 | 1,222624641 |
| A_33_P3424384 | ENST00000403537 | THUMPD2        | THUMP domain containing 2                                    | ENST00000403537 | 1,221769317 |
| A_21_P0012911 | XM_003403424    | LOC100652810   | beta-glucuronidase-like protein SMA5-like                    |                 | 1,220175797 |
| A_33_P3243394 | ENST00000383718 | SLMAP          | sarcolemma associated protein                                | ENST00000383718 | 1,219564712 |
| A_21_P0000508 | NR_024243       | SNAR-D         | small ILF3/NF90-associated RNA D                             |                 | 1,217766487 |
| A_24_P213715  | NR_026993       | LOC90834       | uncharacterized protein BC001742                             |                 | 1,217629064 |



|               |                  |                |                                                               |                 |             |
|---------------|------------------|----------------|---------------------------------------------------------------|-----------------|-------------|
| A_21_P0000509 | NR_024244        | SNAR-G2        | small ILF3/NF90-associated RNA G2                             |                 | 1,217596413 |
| A_21_P0000511 | NR_024342        | SNAR-H         | small ILF3/NF90-associated RNA H                              |                 | 1,21375711  |
| A_23_P74162   | NM_018134        | IQCC           | IQ motif containing C                                         | ENST00000537469 | 1,208806207 |
| A_33_P3237517 | ENST00000369578  | ZNF292         | zinc finger protein 292                                       | ENST00000369578 | 1,207095959 |
| A_33_P3271121 | ENST00000484097  | SH3BP4         | SH3-domain binding protein 4                                  | ENST00000484097 | 1,206453329 |
| A_33_P3289000 | ENST00000409375  | AP1S3          | adaptor-related protein complex 1, sigma 3 subunit            | ENST00000409375 | 1,206006141 |
| A_21_P0000507 | NR_024230        | SNAR-B2        | small ILF3/NF90-associated RNA B2                             |                 | 1,205374322 |
| A_33_P3214119 | ENST00000528751  | NPEPPS         | aminopeptidase puromycin sensitive                            | ENST00000528751 | 1,200421161 |
| A_33_P3394517 | NM_015092        | SMG1           | smg-1 homolog, phosphatidylinositol 3-kinase-related kinase   | ENST00000454049 | 1,198798819 |
| A_21_P0004024 | TCONS_00009444   | XLOC_004456    |                                                               |                 | 1,198441647 |
| A_23_P123108  | ENST00000493453  | AKAP9          | A kinase (PRKA) anchor protein (yotiao) 9                     | ENST00000493453 | 1,196126587 |
| A_21_P0000484 | NR_003942        | SNORD76        | small nucleolar RNA, C/D box 76                               |                 | 1,196120395 |
| A_33_P3247838 | NM_001136501     | ZNF844         | zinc finger protein 844                                       | ENST00000439326 | 1,194728241 |
| A_21_P0000040 | NM_001164313     | ZBTB24         | zinc finger and BTB domain containing 24                      |                 | 1,189720517 |
| A_33_P3434927 | AF521131         | MAGI2-IT1      | MAGI2 intronic transcript 1 (non-protein coding)              |                 | 1,188871437 |
| A_23_P43337   | NM_144966        | FREM1          | FRAS1 related extracellular matrix 1                          | ENST00000380880 | 1,187593786 |
| A_32_P221799  | NM_003514        | HIST1H2AM      | histone cluster 1, H2am                                       | ENST00000359611 | 1,184696452 |
| A_33_P3349252 | AL512723         | DKFZP547L112   | uncharacterized protein DKFZp547L112                          |                 | 1,181009281 |
| A_33_P3324383 | NM_001013690     | FIGNL2         | fidgetin-like 2                                               |                 | 1,179604127 |
| A_33_P3299781 | ENST00000380201  | DDRKG1         | DDRKG domain containing 1                                     | ENST00000380201 | 1,178979078 |
| A_24_P85942   | NM_181453        | GCC2           | GRIP and coiled-coil domain containing 2                      | ENST00000309863 | 1,173246    |
| A_21_P0013877 | TCONS_I2_0003089 | XLOC_I2_015885 |                                                               |                 | 1,17143052  |
| A_33_P3297020 | NR_026816        | PSORS1C3       | psoriasis susceptibility 1 candidate 3 (non-protein coding)   | ENST00000376242 | 1,171409766 |
| A_23_P326142  | NR_027330        | C7orf54        | chromosome 7 open reading frame 54                            |                 | 1,165615211 |
| A_33_P3265479 | ENST00000522974  | ZFAT           | zinc finger and AT hook domain containing                     | ENST00000522974 | 1,163632543 |
| A_33_P3228977 | ENST00000382893  | UTY            | ubiquitously transcribed tetratricopeptide repeat gene, Y-lir | ENST00000382893 | 1,162516077 |
| A_33_P3310189 | NM_000684        | ADRB1          | adrenergic, beta-1-, receptor                                 | ENST00000369295 | 1,161193904 |
| A_23_P206140  | NM_018602        | DNAJA4         | DnaJ (Hsp40) homolog, subfamily A, member 4                   | ENST00000394852 | 1,160098692 |
| A_33_P3212269 | ENST00000534743  | MAP2K3         | mitogen-activated protein kinase kinase 3                     | ENST00000534743 | 1,158470082 |

|                |                                 |                |                                                         |                 |             |
|----------------|---------------------------------|----------------|---------------------------------------------------------|-----------------|-------------|
| A_21_P0013196  | TCONS_I2_0002585:XLOC_I2_013383 |                |                                                         |                 | 1,157594656 |
| A_33_P3422010  | NM_178504                       | DNAH12         | dynein, axonemal, heavy chain 12                        | ENST00000351747 | 1,156582763 |
| A_33_P3349289  | NR_002222                       | ARGFXP2        | arginine-fifty homeobox pseudogene 2                    |                 | 1,156257241 |
| A_33_P3415430  | NM_005346                       | HSPA1B         | heat shock 70kDa protein 1B                             | ENST00000391548 | 1,155886473 |
| A_19_P00330549 | NR_034127                       | LOC100132356   | uncharacterized LOC100132356                            |                 | 1,155689447 |
| A_21_P0013772  | ENST00000453317                 | XLOC_I2_015561 |                                                         | ENST00000453317 | 1,155249343 |
| A_24_P274615   | NM_020801                       | ARRDC3         | arrestin domain containing 3                            | ENST00000265138 | 1,151330713 |
| A_21_P0010592  | NR_033908                       | LOC100288069   | general transcription factor Ili pseudogene             | ENST00000447412 | 1,149467459 |
| A_32_P886589   | NM_175895                       | C12orf61       | chromosome 12 open reading frame 61                     | ENST00000408887 | 1,14838225  |
| A_21_P0014898  | XR_132888                       | LOC100652951   | uncharacterized LOC100652951                            |                 | 1,147523287 |
| A_33_P3464855  | AL050097                        | DKFZP586B0319  | DKFZP586B0319 protein                                   |                 | 1,146152575 |
| A_33_P3348752  | NM_006644                       | HSPH1          | heat shock 105kDa/110kDa protein 1                      | ENST00000380363 | 1,145849231 |
| A_33_P3305243  | ENST00000373903                 | PSMD5          | proteasome (prosome, macropain) 26S subunit, non-ATPase | ENST00000373903 | 1,140985193 |
| A_21_P0013752  | THC2774467                      | XLOC_I2_015441 |                                                         |                 | 1,140655562 |
| A_23_P377411   | AF130105                        | LOC100133130   | PRO1102                                                 |                 | 1,138399304 |
| A_33_P3242829  | ENST00000316005                 | PKN2           | protein kinase N2                                       | ENST00000316005 | 1,13813597  |
| A_33_P3275630  | AK125613                        | LOC100131820   | uncharacterized LOC100131820                            |                 | 1,133996497 |
| A_21_P0005397  | TCONS_00013523                  | XLOC_006163    |                                                         |                 | 1,132930065 |
| A_23_P211056   | NM_013329                       | GCFC1          | GC-rich sequence DNA-binding factor 1                   | ENST00000497873 | 1,130530886 |
| A_33_P3254335  | NM_207406                       | BEND4          | BEN domain containing 4                                 | ENST00000504360 | 1,128961958 |
| A_33_P3396831  | ENST00000368256                 | CCT3           | chaperonin containing TCP1, subunit 3 (gamma)           | ENST00000368256 | 1,127277923 |
| A_33_P3843358  | BG944179                        | SNORD8         | small nucleolar RNA, C/D box 8                          |                 | 1,127256502 |
| A_33_P3229335  | NM_175055                       | HIST3H2BB      | histone cluster 3, H2bb                                 | ENST00000369160 | 1,126955916 |
| A_23_P101683   | NM_001828                       | CLC            | Charcot-Leyden crystal protein                          | ENST00000221804 | 1,126900271 |
| A_33_P3356035  | ENST00000440812                 | SMG7           | smg-7 homolog, nonsense mediated mRNA decay factor (C.  | ENST00000440812 | 1,125985868 |
| A_33_P3268174  | NM_152903                       | KBTBD6         | kelch repeat and BTB (POZ) domain containing 6          | ENST00000379485 | 1,125739277 |
| A_33_P3222307  | AK125520                        | LOC100129380   | uncharacterized LOC100129380                            |                 | 1,123962991 |
| A_21_P0013490  | TCONS_I2_0002778:XLOC_I2_014217 |                |                                                         |                 | 1,121641034 |
| A_33_P3211513  | NM_001162407                    | CLK1           | CDC-like kinase 1                                       | ENST00000357369 | 1,117831533 |

|                |                 |                |                                                      |                 |             |
|----------------|-----------------|----------------|------------------------------------------------------|-----------------|-------------|
| A_33_P3300147  | NM_001001709    | C9orf170       | chromosome 9 open reading frame 170                  |                 | 1,115407295 |
| A_24_P237757   | AL136621        | ZMYM2          | zinc finger, MYM-type 2                              | ENST00000382881 | 1,114171229 |
| A_24_P298495   | AF289590        | LOC100130744   | uncharacterized LOC100130744                         |                 | 1,113442523 |
| A_33_P3390758  | NM_153201       | HSPA8          | heat shock 70kDa protein 8                           | ENST00000453788 | 1,112390307 |
| A_23_P364324   | NM_152701       | ABCA13         | ATP-binding cassette, sub-family A (ABC1), member 13 | ENST00000435803 | 1,108248116 |
| A_33_P3549874  | BC031230        | LOC255177      | uncharacterized LOC255177                            |                 | 1,108127598 |
| A_23_P117261   | NM_130806       | RXFP2          | relaxin/insulin-like family peptide receptor 2       | ENST00000298386 | 1,105576897 |
| A_21_P0000246  | NR_002442       | SNORD18B       | small nucleolar RNA, C/D box 18B                     |                 | 1,104149762 |
| A_33_P3257678  | NM_001005464    | HIST2H3A       | histone cluster 2, H3a                               | ENST00000369158 | 1,101943753 |
| A_21_P0013255  | BG168839        | XLOC_l2_013513 |                                                      |                 | 1,099642155 |
| A_24_P387321   | NM_016264       | ZNF44          | zinc finger protein 44                               | ENST00000355684 | 1,098605313 |
| A_21_P0000243  | NR_002439       | SNORD43        | small nucleolar RNA, C/D box 43                      | ENST00000453303 | 1,097327281 |
| A_23_P39263    | NM_173480       | ZNF57          | zinc finger protein 57                               | ENST00000395204 | 1,096785881 |
| A_33_P3230663  | AY203950        | LOC100130232   | LP2209                                               |                 | 1,095146595 |
| A_33_P3376454  | XR_108564       | LOC100133299   | GALI1870                                             |                 | 1,094990082 |
| A_21_P0000206  | NR_000006       | SNORD21        | small nucleolar RNA, C/D box 21                      | ENST00000497519 | 1,094831908 |
| A_21_P0014758  | XR_132514       | LOC100652921   | uncharacterized LOC100652921                         |                 | 1,094716711 |
| A_23_P415411   | NM_003545       | HIST1H4E       | histone cluster 1, H4e                               | ENST00000360441 | 1,093806002 |
| A_21_P0013267  | NR_026999       | LINC00265      | long intergenic non-protein coding RNA 265           | ENST00000427210 | 1,09063801  |
| A_23_P74737    | NM_001990       | EYA3           | eyes absent homolog 3 (Drosophila)                   | ENST00000495923 | 1,089810441 |
| A_23_P214079   | NM_003122       | SPINK1         | serine peptidase inhibitor, Kazal type 1             | ENST00000505722 | 1,088307125 |
| A_33_P3256500  | ENST00000392645 | ATXN2          | ataxin 2                                             | ENST00000392645 | 1,085601066 |
| A_23_P48495    | NM_004918       | TCL1B          | T-cell leukemia/lymphoma 1B                          | ENST00000461160 | 1,085457631 |
| A_32_P228167   | NM_152589       | C12orf50       | chromosome 12 open reading frame 50                  | ENST00000298699 | 1,080904322 |
| A_19_P00317318 | NM_001145664    | RFX8           |                                                      | ENST00000540519 | 1,080179385 |
| A_23_P24275    | NR_027709       | IDI2-AS1       | IDI2 antisense RNA 1 (non-protein coding)            | ENST00000536039 | 1,079880154 |
| A_33_P3363120  | NR_004387       | SCARNA10       | small Cajal body-specific RNA 10                     |                 | 1,073913815 |
| A_21_P0009386  | TCONS_00025888  | XLOC_012162    |                                                      |                 | 1,067549021 |
| A_33_P3229246  | NM_003528       | HIST2H2BE      | histone cluster 2, H2be                              | ENST00000369155 | 1,067108443 |

|               |                  |                |                                                             |                 |             |
|---------------|------------------|----------------|-------------------------------------------------------------|-----------------|-------------|
| A_23_P203829  | NM_015394        | ZNF10          | zinc finger protein 10                                      | ENST00000426665 | 1,065151655 |
| A_33_P3520835 | AK123449         | FLJ41455       | uncharacterized LOC441441                                   |                 | 1,06468085  |
| A_21_P0010674 | TCONS_I2_0000180 | XLOC_I2_001332 |                                                             |                 | 1,063930641 |
| A_23_P133739  | NM_148959        | HUS1B          | HUS1 checkpoint homolog b (S. pombe)                        | ENST00000380907 | 1,063368208 |
| A_33_P3278392 | BX538347         | NFU1           | NFU1 iron-sulfur cluster scaffold homolog (S. cerevisiae)   |                 | 1,063264973 |
| A_33_P3285145 | XR_109830        | LOC100131826   | TSSP3028                                                    |                 | 1,063108155 |
| A_32_P161994  | NR_029448        | LOC255411      | uncharacterized LOC255411                                   | ENST00000548054 | 1,062978518 |
| A_23_P316582  | NM_152355        | ZNF441         | zinc finger protein 441                                     | ENST00000454339 | 1,061985883 |
| A_33_P3290303 | XR_110306        | LOC100128278   | uncharacterized LOC100128278                                |                 | 1,060430528 |
| A_21_P0000366 | NR_003031        | SNORD11        | small nucleolar RNA, C/D box 11                             |                 | 1,057938631 |
| A_21_P0003279 | TCONS_00007119   | XLOC_003052    |                                                             |                 | 1,057808079 |
| A_32_P8551    | NM_198443        | NRN1L          | neuritin 1-like                                             | ENST00000339176 | 1,057117441 |
| A_33_P3424462 | NM_001139459     | CNST           | consortin, connexin sorting protein                         | ENST00000483271 | 1,056440283 |
| A_33_P3576797 | AL110203         | LOC158863      | uncharacterized LOC158863                                   |                 | 1,055848    |
| A_21_P0000207 | NR_000007        | SNORD73A       | small nucleolar RNA, C/D box 73A                            | ENST00000322686 | 1,055192564 |
| A_21_P0012579 | ENST00000503394  | XLOC_I2_010602 |                                                             | ENST00000503394 | 1,054898924 |
| A_23_P144476  | NM_199327        | SPRY1          | sprouty homolog 1, antagonist of FGF signaling (Drosophila) | ENST00000339241 | 1,053071711 |
| A_24_P929322  | NR_024413        | FLJ42393       | uncharacterized LOC401105                                   | ENST00000392468 | 1,053021731 |
| A_24_P277673  | NM_003547        | HIST1H4G       | histone cluster 1, H4g                                      | ENST00000244537 | 1,051578851 |
| A_33_P3391796 | NM_005450        | NOG            | noggin                                                      | ENST00000332822 | 1,050849971 |
| A_21_P0009632 | TCONS_00026722   | XLOC_012857    |                                                             |                 | 1,050048155 |
| A_24_P941188  | NM_015207        | OTUD3          | OTU domain containing 3                                     | ENST00000375120 | 1,05004723  |
| A_33_P3252730 | NR_027049        | ZNF788         | zinc finger family member 788                               | ENST00000339302 | 1,049790753 |
| A_32_P226205  | NM_033400        | ZFH2           | zinc finger homeobox 2                                      |                 | 1,049472071 |
| A_21_P0005232 | ENST00000440455  | XLOC_006093    |                                                             | ENST00000440455 | 1,04915696  |
| A_23_P58729   | NM_003052        | SLC34A1        | solute carrier family 34 (sodium phosphate), member 1       | ENST00000513614 | 1,048734758 |
| A_33_P3507384 | AK056398         | LOC152274      | uncharacterized LOC152274                                   |                 | 1,047353009 |
| A_33_P3358163 | NM_018958        | C15orf2        | chromosome 15 open reading frame 2                          | ENST00000329468 | 1,044383321 |
| A_33_P3538279 | AF130079         | PRO2852        | uncharacterized protein PRO2852                             |                 | 1,044223522 |

|               |                  |                |                                                                                 |                 |             |
|---------------|------------------|----------------|---------------------------------------------------------------------------------|-----------------|-------------|
| A_24_P166407  | NM_003544        | HIST1H4B       | histone cluster 1, H4b                                                          | ENST00000377364 | 1,043947904 |
| A_33_P3221134 | XR_132709        | LOC100128857   | beta-1,3-N-acetylgalactosaminyltransferase 1 (globoside blood group) pseudogene |                 | 1,043802826 |
| A_21_P0013393 | ENST00000415536  | XLOC_I2_013513 |                                                                                 | ENST00000415536 | 1,043282451 |
| A_21_P0000497 | NR_004396        | SNORD1B        | small nucleolar RNA, C/D box 1B                                                 |                 | 1,041806231 |
| A_21_P0000380 | NR_003057        | SNORD69        | small nucleolar RNA, C/D box 69                                                 |                 | 1,041593598 |
| A_33_P3401284 | NR_003051        | RMRP           | RNA component of mitochondrial RNA processing endoribonuclease                  |                 | 1,041227404 |
| A_33_P3331711 | AK124300         | LOC100130463   | uncharacterized LOC100130463                                                    |                 | 1,040947402 |
| A_33_P3265714 | NM_173649        | C2orf61        | chromosome 2 open reading frame 61                                              |                 | 1,039456023 |
| A_21_P0002602 | TCONS_00004841   | XLOC_001564    |                                                                                 |                 | 1,039402039 |
| A_33_P3365710 | AK125522         | ATP6V0D1       | ATPase, H+ transporting, lysosomal 38kDa, V0 subunit d1                         |                 | 1,039142729 |
| A_21_P0013838 | AL528462         | XLOC_I2_015855 |                                                                                 |                 | 1,038849625 |
| A_21_P0011304 | TCONS_I2_0000849 | XLOC_I2_004596 |                                                                                 |                 | 1,038660848 |
| A_33_P3294951 | NM_001097643     | TAS2R30        | taste receptor, type 2, member 30                                               | ENST00000539585 | 1,030300594 |
| A_21_P0000155 | NM_001204453     | PSMC2          | proteasome (prosome, macropain) 26S subunit, ATPase, 2                          | ENST00000460021 | 1,030166509 |
| A_24_P7202    | NM_020738        | KIDINS220      | kinase D-interacting substrate, 220kDa                                          | ENST00000319688 | 1,029746113 |
| A_21_P0007774 | TCONS_00020953   | XLOC_010219    |                                                                                 |                 | 1,028972931 |
| A_21_P0000332 | NR_002977        | SNORA45        | small nucleolar RNA, H/ACA box 45                                               |                 | 1,028756136 |
| A_23_P363174  | NM_003511        | HIST1H2AL      | histone cluster 1, H2al                                                         | ENST00000357320 | 1,027758767 |
| A_33_P3227842 | NM_001166006     | EPB41          | erythrocyte membrane protein band 4.1 (elliptocytosis 1, R                      | ENST00000373797 | 1,02707625  |
| A_21_P0000389 | NR_003073        | SNORD91B       | small nucleolar RNA, C/D box 91B                                                |                 | 1,023480097 |
| A_33_P3334625 | AK123321         | FLJ41327       | FLJ41327 protein                                                                |                 | 1,023377475 |
| A_21_P0000303 | NR_002921        | SNORA75        | small nucleolar RNA, H/ACA box 75                                               |                 | 1,022553127 |
| A_33_P3230837 | NR_003006        | SCARNA6        | small Cajal body-specific RNA 6                                                 |                 | 1,022109348 |
| A_33_P3795707 | CU457294         | SNORA16B       | small nucleolar RNA, H/ACA box 16B                                              |                 | 1,021981422 |
| A_33_P3324137 | BC015320         | PRO0628        | uncharacterized LOC29053                                                        |                 | 1,020103311 |
| A_21_P0000216 | NR_000016        | SNORD36C       | small nucleolar RNA, C/D box 36C                                                | ENST00000492798 | 1,01962746  |
| A_33_P3363091 | U25801           | VAC14          | Vac14 homolog ( <i>S. cerevisiae</i> )                                          |                 | 1,018042281 |
| A_21_P0010673 | TCONS_I2_0000180 | XLOC_I2_001332 |                                                                                 |                 | 1,016732962 |
| A_23_P408167  | NM_001004051     | GPRASP2        | G protein-coupled receptor associated sorting protein 2                         | ENST00000332262 | 1,014406843 |



|                |                  |                |                                                          |                 |             |
|----------------|------------------|----------------|----------------------------------------------------------|-----------------|-------------|
| A_33_P3267814  | NM_001136004     | MICAL3         | microtubule associated monooxygenase, calponin and LIM d | ENST00000461307 | 1,013427852 |
| A_33_P3346327  | NR_003674        | KGFLP1         | fibroblast growth factor 7 pseudogene                    | ENST00000377614 | 1,013337735 |
| A_33_P3312735  | NM_024989        | PGAP1          | post-GPI attachment to proteins 1                        | ENST00000422382 | 1,012938369 |
| A_21_P0000491  | NR_004383        | SNAR-G1        | small ILF3/NF90-associated RNA G1                        |                 | 1,011568435 |
| A_23_P108743   | NM_152381        | XIRP2          | xin actin-binding repeat containing 2                    | ENST00000295237 | 1,008862075 |
| A_33_P3270793  | NM_145175        | FAM84A         | family with sequence similarity 84, member A             | ENST00000359969 | 1,007417072 |
| A_33_P3346292  | ENST00000379225  | UBAP2          | ubiquitin associated protein 2                           | ENST00000379225 | 1,00569845  |
| A_21_P0001616  | TCONS_00001799   | XLOC_001188    |                                                          |                 | 1,005617217 |
| A_33_P3378935  | AB209007         | RBM14          | RNA binding motif protein 14                             | ENST00000409372 | 1,005461049 |
| A_21_P0000239  | NR_002434        | SNORD101       | small nucleolar RNA, C/D box 101                         |                 | 1,005377796 |
| A_21_P0014026  | XM_003403523     | IGANRP         | uncharacterized protein LOC100652933                     |                 | 1,005062047 |
| A_19_P00808213 | NM_178549        | ZNF678         |                                                          |                 | 1,003869406 |
| A_21_P0007089  | ENST00000455566  | PPP2R2D        | protein phosphatase 2, regulatory subunit B, delta       | ENST00000455566 | 1,003856593 |
| A_19_P00807374 | TCONS_I2_0002039 | XLOC_I2_010558 |                                                          |                 | 1,001562466 |
| A_33_P3413667  | NM_001136001     | ABL2           | v-abl Abelson murine leukemia viral oncogene homolog 2   | ENST00000392043 | 1,000349122 |
| A_33_P3351686  | NM_001114938     | CCDC17         | coiled-coil domain containing 17                         | ENST00000479529 | 1,000223216 |
| A_33_P3510335  | NM_213655        | WNK1           | WNK lysine deficient protein kinase 1                    | ENST00000530271 | 0,999246669 |
| A_21_P0008664  | BX538250         | SCARNA15       | small Cajal body-specific RNA 15                         |                 | 0,998647073 |
| A_24_P198629   | NM_001040616     | LINS           | lines homolog (Drosophila)                               | ENST00000314742 | 0,998529228 |
| A_33_P3359763  | ENST00000466317  | FLCN           | folliculin                                               | ENST00000466317 | 0,997213784 |
| A_24_P23445    | NR_029422        | RNU12          | RNA, U12 small nuclear                                   |                 | 0,99696849  |
| A_23_P256244   | ENST00000497705  | OXR1           | oxidation resistance 1                                   | ENST00000497705 | 0,9964248   |
| A_21_P0004308  | TCONS_00010118   | XLOC_004584    |                                                          |                 | 0,996274867 |
| A_21_P0014861  | ENST00000556578  | LOC100652952   |                                                          | ENST00000556578 | 0,994209357 |
| A_24_P737939   | NM_001012974     | C6orf154       | chromosome 6 open reading frame 154                      | ENST00000468319 | 0,991784052 |
| A_21_P0013966  | ENST00000423269  | CLTC-IT1       |                                                          | ENST00000423269 | 0,991774873 |
| A_33_P3274618  | NR_029401        | LOC731275      | uncharacterized LOC731275                                | ENST00000427210 | 0,991694476 |
| A_21_P0013298  | NR_024271        | SEPT7P2        | septin 7 pseudogene 2                                    | ENST00000338231 | 0,990952299 |
| A_33_P3397323  | NM_152355        | ZNF441         | zinc finger protein 441                                  | ENST00000357901 | 0,990486164 |

|               |                  |                |                                                                                     |                 |             |
|---------------|------------------|----------------|-------------------------------------------------------------------------------------|-----------------|-------------|
| A_33_P3301752 | XR_108277        | FLJ21369       | uncharacterized protein FLJ21369                                                    |                 | 0,990183954 |
| A_33_P3216357 | NM_001146702     | KDM5C          | lysine (K)-specific demethylase 5C                                                  | ENST00000349663 | 0,989957466 |
| A_21_P0010755 | NM_022064        | RNF123         | ring finger protein 123                                                             | ENST00000443204 | 0,988331971 |
| A_24_P925635  | NR_024271        | SEPT7P2        | septin 7 pseudogene 2                                                               | ENST00000338231 | 0,98774619  |
| A_24_P475864  | NR_003369        | RRN3P2         | RNA polymerase I transcription factor homolog ( <i>S. cerevisiae</i> ) pseudogene 2 |                 | 0,987122313 |
| A_33_P3255755 | AK123337         | CROCCP2        | ciliary rootlet coiled-coil, rootletin pseudogene 2                                 |                 | 0,986680046 |
| A_21_P0012894 | ENST00000515123  | XLOC_I2_011959 |                                                                                     | ENST00000515123 | 0,986547424 |
| A_24_P583225  | NR_026999        | LINC00265      | long intergenic non-protein coding RNA 265                                          | ENST00000423687 | 0,986324371 |
| A_33_P3363082 | NR_003008        | SCARNA5        | small Cajal body-specific RNA 5                                                     |                 | 0,983731068 |
| A_21_P0010950 | THC2554014       | XLOC_I2_002033 |                                                                                     |                 | 0,982418568 |
| A_33_P3381781 | ENST00000369067  | RPRD2          | regulation of nuclear pre-mRNA domain containing 2                                  | ENST00000369067 | 0,980649079 |
| A_33_P3275381 | NM_001039580     | MAP9           | microtubule-associated protein 9                                                    | ENST00000393836 | 0,977684962 |
| A_33_P3308481 | NR_002768        | HYMAI          | hydatidiform mole associated and imprinted (non-protein coding)                     |                 | 0,976027759 |
| A_33_P3267463 | ENST00000381984  | RFX3           | regulatory factor X, 3 (influences HLA class II expression)                         | ENST00000381984 | 0,975214313 |
| A_21_P0013766 | TCONS_I2_0003022 | XLOC_I2_015536 |                                                                                     |                 | 0,973673152 |
| A_21_P0005565 | DB461521         | XLOC_006132    |                                                                                     |                 | 0,972514315 |
| A_33_P3503937 | AK094426         | LOC284581      | uncharacterized LOC284581                                                           |                 | 0,972299316 |
| A_23_P16242   | NM_021143        | ZNF20          | zinc finger protein 20                                                              | ENST00000430024 | 0,972222741 |
| A_33_P3526315 | BC005372         | MGC12488       | uncharacterized protein MGC12488                                                    |                 | 0,972120555 |
| A_33_P3385983 | NM_021143        | ZNF20          | zinc finger protein 20                                                              | ENST00000292241 | 0,971272532 |
| A_21_P0000847 | NR_038942        | LOC100630918   | uncharacterized LOC100630918                                                        |                 | 0,969552953 |
| A_21_P0009582 | TCONS_00026568   | XLOC_012886    |                                                                                     |                 | 0,966776277 |
| A_24_P380679  | NM_182597        | C7orf53        | chromosome 7 open reading frame 53                                                  | ENST00000312849 | 0,966314382 |
| A_33_P3289005 | NM_001039569     | AP1S3          | adaptor-related protein complex 1, sigma 3 subunit                                  | ENST00000446015 | 0,966161498 |
| A_21_P0011910 | NM_012124        | CHORDC1        | cysteine and histidine-rich domain (CHORD) containing 1                             | ENST00000525317 | 0,965994107 |
| A_21_P0000267 | NR_002583        | SNORD72        | small nucleolar RNA, C/D box 72                                                     |                 | 0,965849855 |
| A_33_P3371752 | ENST00000371727  | EPS15          | epidermal growth factor receptor pathway substrate 15                               | ENST00000371727 | 0,965815372 |
| A_21_P0011290 | TCONS_I2_0000841 | XLOC_I2_004563 |                                                                                     |                 | 0,965558204 |
| A_33_P3302632 | NM_003523        | HIST1H2BE      | histone cluster 1, H2be                                                             |                 | 0,965115962 |

|                |                                  |                |                                                            |                 |             |
|----------------|----------------------------------|----------------|------------------------------------------------------------|-----------------|-------------|
| A_21_P0013164  | NR_028093                        | LPAL2          | lipoprotein, Lp(a)-like 2, pseudogene                      | ENST00000435757 | 0,964502379 |
| A_23_P23102    | NM_145238                        | ZSCAN20        | zinc finger and SCAN domain containing 20                  | ENST00000326544 | 0,964305677 |
| A_19_P00805452 | TCONS_I2_0002039: XLOC_I2_010558 |                |                                                            |                 | 0,964160513 |
| A_21_P0010675  | NR_029401                        | LOC731275      | uncharacterized LOC731275                                  | ENST00000427210 | 0,964158114 |
| A_24_P393958   | NM_007034                        | DNAJB4         | DnaJ (Hsp40) homolog, subfamily B, member 4                | ENST00000370763 | 0,964059694 |
| A_33_P3578477  | NR_038381                        | LOC641467      | uncharacterized LOC641467                                  |                 | 0,963798826 |
| A_32_P149546   | NM_014675                        | CROCC          | ciliary rootlet coiled-coil, rootletin                     | ENST00000467715 | 0,963638337 |
| A_23_P211252   | NM_001001438                     | LSS            | lanosterol synthase (2,3-oxidosqualene-lanosterol cyclase) | ENST00000356396 | 0,963152847 |
| A_23_P130482   | NM_198855                        | ZNF211         | zinc finger protein 211                                    | ENST00000254182 | 0,962978159 |
| A_21_P0008992  | TCONS_00024502                   | XLOC_011821    |                                                            |                 | 0,962903454 |
| A_19_P00315603 | TCONS_I2_0003053: XLOC_I2_015760 |                |                                                            |                 | 0,962035218 |
| A_33_P3299319  | NM_001136137                     | RPL28          | ribosomal protein L28                                      | ENST00000428193 | 0,961932143 |
| A_23_P316447   | ENST00000496296                  | FGFR1          | fibroblast growth factor receptor 1                        | ENST00000496296 | 0,960513234 |
| A_33_P3222769  | NM_001013638                     | PRR25          | proline rich 25                                            | ENST00000301698 | 0,959321573 |
| A_21_P0000502  | NR_004407                        | RNU11          | RNA, U11 small nuclear                                     |                 | 0,958040723 |
| A_21_P0014606  | ENST00000415255                  | LOC100506950   |                                                            | ENST00000415255 | 0,957078471 |
| A_21_P0000374  | NR_003046                        | SNORD59B       | small nucleolar RNA, C/D box 59B                           |                 | 0,956353158 |
| A_33_P3382595  | NR_001445                        | RN7SK          | RNA, 7SK small nuclear                                     | ENST00000421043 | 0,955948796 |
| A_21_P0000395  | NR_003079                        | SNORD111       | small nucleolar RNA, C/D box 111                           |                 | 0,955840361 |
| A_21_P0011826  | TCONS_I2_0001384: XLOC_I2_007449 |                |                                                            |                 | 0,954359751 |
| A_23_P217899   | NM_030937                        | CCNL2          | cyclin L2                                                  | ENST00000480479 | 0,953910226 |
| A_21_P0011393  | ENST00000507787                  | XLOC_I2_004594 |                                                            | ENST00000507787 | 0,953799745 |
| A_21_P0003963  | ENST00000504494                  | XLOC_004279    |                                                            | ENST00000504494 | 0,95291955  |
| A_33_P3248424  | NM_138348                        | FAM105B        | family with sequence similarity 105, member B              |                 | 0,952307085 |
| A_24_P91405    | NM_152601                        | ZNF709         | zinc finger protein 709                                    | ENST00000397732 | 0,951973629 |
| A_33_P3344277  | BC057389                         | HS1BP3         | HCLS1 binding protein 3                                    | ENST00000402541 | 0,951190935 |
| A_24_P918175   | BC009864                         | LOC653581      | uncharacterized LOC653581                                  |                 | 0,949966825 |
| A_23_P405110   | NM_033313                        | CDC14A         | CDC14 cell division cycle 14 homolog A (S. cerevisiae)     | ENST00000370124 | 0,949097854 |
| A_21_P0000281  | NR_002737                        | SNORD59A       | small nucleolar RNA, C/D box 59A                           |                 | 0,949050922 |

|                |                 |              |                                                              |                 |             |
|----------------|-----------------|--------------|--------------------------------------------------------------|-----------------|-------------|
| A_24_P55148    | NM_021058       | HIST1H2BJ    | histone cluster 1, H2bj                                      | ENST00000339812 | 0,949037322 |
| A_21_P0000297  | NR_002914       | SNORD62A     | small nucleolar RNA, C/D box 62A                             | ENST00000426867 | 0,948455115 |
| A_23_P148600   | NR_024616       | INE1         | inactivation escape 1 (non-protein coding)                   | ENST00000456273 | 0,94784274  |
| A_33_P3219601  | NM_007314       | ABL2         | v-abl Abelson murine leukemia viral oncogene homolog 2       | ENST00000504405 | 0,947490424 |
| A_21_P0000461  | NR_003686       | SNORD125     | small nucleolar RNA, C/D box 125                             |                 | 0,946589921 |
| A_23_P428129   | NM_000076       | CDKN1C       | cyclin-dependent kinase inhibitor 1C (p57, Kip2)             | ENST00000313407 | 0,946349191 |
| A_33_P3330323  | NM_001080541    | MGA          | MAX gene associated                                          | ENST00000219905 | 0,944706571 |
| A_23_P379746   | NM_144973       | DENND5B      | DENN/MADD domain containing 5B                               | ENST00000354285 | 0,944619876 |
| A_33_P3281363  | BC037956        | TRIP12       | thyroid hormone receptor interactor 12                       | ENST00000409677 | 0,944507895 |
| A_21_P0014786  | XR_132568       | LOC100507663 | uncharacterized LOC100507663                                 |                 | 0,943710376 |
| A_33_P3399064  | NR_003285       | RN5-8S1      | RNA, 5.8S ribosomal 1                                        |                 | 0,943539661 |
| A_33_P3403952  | BC066931        | SETD3        | SET domain containing 3                                      | ENST00000436070 | 0,943088175 |
| A_24_P168574   | ENST00000481768 | GNAS         | GNAS complex locus                                           | ENST00000481768 | 0,940513996 |
| A_33_P3254331  | NM_007272       | CTRC         | chymotrypsin C (caldecrin)                                   | ENST00000375949 | 0,940262603 |
| A_24_P356      | ENST00000406297 | AAK1         | AP2 associated kinase 1                                      | ENST00000406297 | 0,940243576 |
| A_23_P360626   | NM_178836       | PLD6         | phospholipase D family, member 6                             | ENST00000321560 | 0,940120607 |
| A_23_P371824   | NM_020127       | TUFT1        | tuftelin 1                                                   | ENST00000507671 | 0,939434192 |
| A_33_P3368339  | NM_001045477    | FAM22G       | family with sequence similarity 22, member G                 | ENST00000354649 | 0,938381586 |
| A_21_P0000469  | NR_003694       | SNORD11B     | small nucleolar RNA, C/D box 11B                             |                 | 0,938134886 |
| A_23_P344281   | NM_001010879    | ZIK1         | zinc finger protein interacting with K protein 1 homolog (mc | ENST00000307468 | 0,937806445 |
| A_21_P0000087  | NM_001172574    | MCPH1        | microcephalin 1                                              |                 | 0,937721485 |
| A_23_P89327    | NM_020652       | ZNF286A      | zinc finger protein 286A                                     | ENST00000421016 | 0,937506824 |
| A_23_P433132   | NM_173853       | KRTCAP3      | keratinocyte associated protein 3                            | ENST00000453171 | 0,936832123 |
| A_19_P00803342 | NM_178549       | ZNF678       |                                                              |                 | 0,936609605 |
| A_24_P409126   | ENST00000378383 | FNDC3A       | fibronectin type III domain containing 3A                    | ENST00000378383 | 0,935958629 |
| A_33_P3357049  | NR_026768       | RPS15AP10    | ribosomal protein S15a pseudogene 10                         |                 | 0,935858597 |
| A_33_P3374035  | AK094630        | PD XK        | pyridoxal (pyridoxine, vitamin B6) kinase                    |                 | 0,935371779 |
| A_23_P211064   | NM_013329       | GCFC1        | GC-rich sequence DNA-binding factor 1                        | ENST00000472588 | 0,933581634 |
| A_23_P65208    | NM_001039650    | ZMYM5        | zinc finger, MYM-type 5                                      | ENST00000467542 | 0,933566098 |

|                |                  |                |                                                                            |                 |             |
|----------------|------------------|----------------|----------------------------------------------------------------------------|-----------------|-------------|
| A_33_P3350343  | AK021845         | MLL            | myeloid/lymphoid or mixed-lineage leukemia (trithorax homolog, Drosophila) |                 | 0,931505295 |
| A_33_P3502037  | NM_012124        | CHORDC1        | cysteine and histidine-rich domain (CHORD) containing 1                    | ENST00000525317 | 0,929157688 |
| A_21_P0013834  | NM_001017417     | CT45A1         | cancer/testis antigen family 45, member A1                                 | ENST00000495729 | 0,925635749 |
| A_24_P921327   | ENST00000505317  | TAPT1          | transmembrane anterior posterior transformation 1                          | ENST00000505317 | 0,92536664  |
| A_23_P164737   | NM_004831        | MED26          | mediator complex subunit 26                                                | ENST00000263390 | 0,925251057 |
| A_21_P0000384  | NR_003066        | SNORD85        | small nucleolar RNA, C/D box 85                                            |                 | 0,924704756 |
| A_33_P3290949  | ENST00000487043  | PTCD3          | Pentatricopeptide repeat domain 3                                          | ENST00000487043 | 0,923650249 |
| A_23_P102286   | NM_000233        | LHCGR          | luteinizing hormone/choriogonadotropin receptor                            | ENST00000401907 | 0,922446817 |
| A_23_P54100    | NM_001437        | ESR2           | estrogen receptor 2 (ER beta)                                              | ENST00000357782 | 0,921886044 |
| A_21_P0000390  | NR_003074        | SNORD92        | small nucleolar RNA, C/D box 92                                            |                 | 0,921615818 |
| A_33_P3264667  | NM_183374        | CYP26C1        | cytochrome P450, family 26, subfamily C, polypeptide 1                     | ENST00000285949 | 0,92123847  |
| A_23_P35414    | NM_005398        | PPP1R3C        | protein phosphatase 1, regulatory subunit 3C                               | ENST00000238994 | 0,919303508 |
| A_21_P0013193  | NR_026873        | LINC00174      | long intergenic non-protein coding RNA 174                                 | ENST00000416572 | 0,918368778 |
| A_23_P14649    | NR_026808        | ANP32A-IT1     | ANP32A intronic transcript 1 (non-protein coding)                          |                 | 0,918316383 |
| A_19_P00315601 | TCONS_I2_0003053 | XLOC_I2_015760 |                                                                            |                 | 0,917621861 |
| A_21_P0007078  | TCONS_00018817   | XLOC_008614    |                                                                            |                 | 0,916965366 |
| A_21_P0000254  | NR_002560        | SNORD31        | small nucleolar RNA, C/D box 31                                            |                 | 0,915461436 |
| A_19_P00812562 | XM_001716361     | LOC388210      | apolipoporphins-like                                                       |                 | 0,914972147 |
| A_21_P0000381  | NR_003058        | SNORD70        | small nucleolar RNA, C/D box 70                                            |                 | 0,914952088 |
| A_23_P96590    | NM_014710        | GPRASP1        | G protein-coupled receptor associated sorting protein 1                    | ENST00000361600 | 0,914701015 |
| A_21_P0014686  | XR_111617        | LOC100507918   | uncharacterized LOC100507918                                               |                 | 0,914214753 |
| A_23_P167920   | NM_005618        | DLL1           | delta-like 1 (Drosophila)                                                  | ENST00000366756 | 0,913914709 |
| A_23_P67278    | NM_005815        | ZNF443         | zinc finger protein 443                                                    | ENST00000411622 | 0,913784143 |
| A_21_P0000708  | NR_037933        | C14orf55       | metalloproteinase-disintegrin 1-2 pseudogene                               | ENST00000556964 | 0,913663248 |
| A_33_P3373139  | ENST00000470139  | SZT2           | seizure threshold 2 homolog (mouse)                                        | ENST00000470139 | 0,913224856 |
| A_23_P376686   | NM_019602        | BTNL2          | butyrophilin-like 2 (MHC class II associated)                              | ENST00000374993 | 0,913069052 |
| A_33_P3383065  | NM_001195150     | LOC100130705   | uncharacterized LOC100130705                                               |                 | 0,913054597 |
| A_21_P0003154  | NR_028303        | LOC100302640   | uncharacterized LOC100302640                                               |                 | 0,913019287 |
| A_21_P0006122  | TCONS_00015913   | XLOC_007276    |                                                                            |                 | 0,912834546 |



|               |                 |              |                                                               |                 |             |
|---------------|-----------------|--------------|---------------------------------------------------------------|-----------------|-------------|
| A_23_P147439  | NM_148416       | ATXN2L       | ataxin 2-like                                                 | ENST00000359153 | 0,912250045 |
| A_23_P423074  | NM_015566       | FAM169A      | family with sequence similarity 169, member A                 | ENST00000510609 | 0,911914237 |
| A_33_P3264379 | NR_027049       | ZNF788       | zinc finger family member 788                                 | ENST00000397759 | 0,910352563 |
| A_23_P309950  | ENST00000370271 | FAM178A      | family with sequence similarity 178, member A                 | ENST00000370271 | 0,909684738 |
| A_33_P3372069 | NM_182971       | COX8C        | cytochrome c oxidase subunit VIIIc                            | ENST00000342144 | 0,905467206 |
| A_23_P30254   | NM_006622       | PLK2         | polo-like kinase 2                                            | ENST00000502671 | 0,905461871 |
| A_33_P3270218 | ENST00000404008 | USP42        | ubiquitin specific peptidase 42                               | ENST00000404008 | 0,905215583 |
| A_33_P3265956 | ENST00000397798 | CBFA2T2      | core-binding factor, runt domain, alpha subunit 2; translocat | ENST00000397798 | 0,904834488 |
| A_33_P3362652 | NM_001005514    | OR5H14       | olfactory receptor, family 5, subfamily H, member 14          | ENST00000437310 | 0,904363921 |
| A_23_P20722   | NM_003086       | SNAPC4       | small nuclear RNA activating complex, polypeptide 4, 190kD    | ENST00000298532 | 0,904154349 |
| A_21_P0000285 | NR_002744       | SNORD49A     | small nucleolar RNA, C/D box 49A                              |                 | 0,904044481 |
| A_33_P3345796 | ENST00000368982 | SNX3         | sorting nexin 3                                               | ENST00000368982 | 0,903980197 |
| A_21_P0000557 | NR_028303       | LOC100302640 | uncharacterized LOC100302640                                  |                 | 0,90315748  |
| A_33_P3407339 | NM_206921       | C6orf204     | chromosome 6 open reading frame 204                           | ENST00000392500 | 0,902764463 |
| A_33_P3423700 | AK124002        | LOC100131829 | uncharacterized LOC100131829                                  |                 | 0,902704963 |
| A_21_P0011131 | NR_027248       | ANKRD26P3    | ankyrin repeat domain 26 pseudogene 3                         |                 | 0,901917004 |
| A_21_P0002502 | TCONS_00004440  | XLOC_002313  |                                                               |                 | 0,901895453 |
| A_23_P141345  | NM_001932       | MPP3         | membrane protein, palmitoylated 3 (MAGUK p55 subfamily)       | ENST00000398389 | 0,900613786 |
| A_33_P3254306 | ENST00000389168 | FLCN         | folliculin                                                    | ENST00000389168 | 0,898849319 |
| A_24_P912372  | NM_015038       | KIAA0754     | KIAA0754                                                      | ENST00000530275 | 0,898027799 |
| A_23_P57007   | AF090938        | LOC100127886 | uncharacterized LOC100127886                                  |                 | 0,897885543 |
| A_33_P3385376 | NM_001040709    | SYPL2        | synaptophysin-like 2                                          |                 | 0,89768723  |
| A_33_P3671291 | AA378382        | SNORA12      | small nucleolar RNA, H/ACA box 12                             |                 | 0,897413003 |
| A_23_P350895  | ENST00000317419 | RABGAP1      | RAB GTPase activating protein 1                               | ENST00000317419 | 0,897372478 |
| A_33_P3415321 | NR_002329       | ST7-OT4      | ST7 overlapping transcript 4 (non-protein coding)             | ENST00000397750 | 0,897355117 |
| A_33_P3214785 | AK094801        | LEPROT       | leptin receptor overlapping transcript                        |                 | 0,89662267  |
| A_33_P3300800 | NR_024042       | GUCY2E       | guanylate cyclase 2E                                          | ENST00000526984 | 0,896339734 |
| A_33_P3209254 | AK097937        | RPS16P5      | ribosomal protein S16 pseudogene 5                            |                 | 0,894578729 |
| A_21_P0000265 | NR_002580       | SNORA3       | small nucleolar RNA, H/ACA box 3                              | ENST00000530585 | 0,893679682 |

|                |                 |                |                                                                   |                 |             |
|----------------|-----------------|----------------|-------------------------------------------------------------------|-----------------|-------------|
| A_33_P3394065  | ENST00000376565 | PIP4K2A        | phosphatidylinositol-5-phosphate 4-kinase, type II, alpha         | ENST00000376565 | 0,893659271 |
| A_33_P3344492  | NR_002997       | SCARNA1        | small Cajal body-specific RNA 1                                   |                 | 0,893231845 |
| A_21_P0001010  | TCONS_00000293  | XLOC_000377    |                                                                   |                 | 0,892501079 |
| A_21_P0001652  | TCONS_00001898  | XLOC_001286    |                                                                   |                 | 0,892425084 |
| A_21_P0014462  | XR_109944       | ZNF638-IT1     | ZNF638 intronic transcript 1 (non-protein coding)                 |                 | 0,892355414 |
| A_21_P0000462  | NR_003687       | SNORD19B       | small nucleolar RNA, C/D box 19B                                  | ENST00000496254 | 0,892153463 |
| A_33_P3209816  | NM_207325       | DPY19L3        | dpy-19-like 3 (C. elegans)                                        | ENST00000392248 | 0,891891962 |
| A_33_P3281532  | NM_022780       | RMND5A         | required for meiotic nuclear division 5 homolog A (S. cerevisiae) | ENST00000283632 | 0,891749577 |
| A_33_P3411307  | AK128269        | LOC100130276   | uncharacterized LOC100130276                                      |                 | 0,891400728 |
| A_23_P65797    | NM_022480       | KLHL25         | kelch-like 25 (Drosophila)                                        | ENST00000337975 | 0,890112712 |
| A_23_P156809   | NM_001127395    | METTL21A       | methyltransferase like 21A                                        | ENST00000412930 | 0,889521556 |
| A_21_P0000344  | NM_001007074    | RPL32          | ribosomal protein L32                                             | ENST00000396953 | 0,888487866 |
| A_32_P70724    | NM_006618       | KDM5B          | lysine (K)-specific demethylase 5B                                | ENST00000538292 | 0,888341107 |
| A_23_P143845   | NM_015508       | TIPARP         | TCDD-inducible poly(ADP-ribose) polymerase                        | ENST00000461166 | 0,888203993 |
| A_23_P415643   | NM_152652       | ZNF48          | zinc finger protein 48                                            | ENST00000320159 | 0,888043483 |
| A_23_P92860    | NM_021147       | CCNO           | cyclin O                                                          | ENST00000501463 | 0,887014926 |
| A_33_P3214209  | NR_027027       | GUSBP1         | glucuronidase, beta pseudogene 1                                  | ENST00000508973 | 0,886839931 |
| A_23_P411723   | NM_002655       | PLAG1          | pleiomorphic adenoma gene 1                                       | ENST00000316981 | 0,886564965 |
| A_21_P0010437  | TCONS_00029688  | XLOC_014356    |                                                                   |                 | 0,886438801 |
| A_23_P254212   | NM_013347       | RPA4           | replication protein A4, 30kDa                                     | ENST00000373040 | 0,886390219 |
| A_23_P254025   | NM_003408       | ZFP37          | zinc finger protein 37 homolog (mouse)                            | ENST00000555206 | 0,885911754 |
| A_33_P3422429  | ENST00000459752 | INADL          | InaD-like (Drosophila)                                            | ENST00000459752 | 0,884748203 |
| A_21_P0003157  | TCONS_00006602  | XLOC_003209    |                                                                   |                 | 0,884103817 |
| A_23_P16022    | NM_005773       | ZNF256         | zinc finger protein 256                                           | ENST00000282308 | 0,882775113 |
| A_21_P0011424  | THC2662045      | XLOC_I2_005179 |                                                                   |                 | 0,881770608 |
| A_23_P117261   | NM_130806       | RXFP2          | relaxin/insulin-like family peptide receptor 2                    | ENST00000298386 | 0,881737037 |
| A_19_P00318561 | XR_108763       | LOC100506516   | uncharacterized LOC100506516                                      | ENST00000414621 | 0,881658233 |
| A_21_P0013439  | ENST00000412091 | XLOC_I2_013873 |                                                                   | ENST00000412091 | 0,881575777 |
| A_21_P0014278  | NR_045382       | LOC100507066   | uncharacterized LOC100507066                                      |                 | 0,880895887 |

|               |                  |                |                                                          |  |                 |             |
|---------------|------------------|----------------|----------------------------------------------------------|--|-----------------|-------------|
| A_21_P0013979 | XM_003119000     | LOC100506073   |                                                          |  |                 | 0,880843517 |
| A_24_P68019   | NM_138347        | ZNF551         | zinc finger protein 551                                  |  | ENST00000282296 | 0,880803055 |
| A_21_P0011310 | NM_004667        | HERC2          | hect domain and RLD 2                                    |  | ENST00000261609 | 0,880308586 |
| A_33_P3270192 | ENST00000409401  | DIS3L2         | DIS3 mitotic control homolog (S. cerevisiae)-like 2      |  | ENST00000409401 | 0,879682087 |
| A_21_P0011130 | THC2506137       | XLOC_I2_003647 |                                                          |  |                 | 0,878699742 |
| A_23_P410717  | NM_144697        | C1orf51        | chromosome 1 open reading frame 51                       |  | ENST00000290363 | 0,878181594 |
| A_21_P0011357 | NR_024074        | GOLGA8IP       | golgin A8 family, member I, pseudogene                   |  | ENST00000339078 | 0,877277364 |
| A_33_P3400758 | NM_152791        | ZNF555         | zinc finger protein 555                                  |  | ENST00000382127 | 0,877240908 |
| A_33_P3403254 | NM_001080404     | ZNF878         | zinc finger protein 878                                  |  | ENST00000440730 | 0,876339912 |
| A_21_P0004700 | ENST00000434562  | XLOC_005526    |                                                          |  | ENST00000434562 | 0,875654465 |
| A_33_P3251347 | ENST00000378928  | TAB3           | TGF-beta activated kinase 1/MAP3K7 binding protein 3     |  | ENST00000378928 | 0,875271061 |
| A_24_P177568  | NM_133473        | ZNF431         | zinc finger protein 431                                  |  | ENST00000311048 | 0,874763481 |
| A_33_P3226995 | NM_006137        | CD7            | CD7 molecule                                             |  | ENST00000312648 | 0,874414938 |
| A_21_P0011489 | TCONS_I2_0001028 | XLOC_I2_005553 |                                                          |  |                 | 0,874303782 |
| A_23_P301328  | ENST00000476313  | PDXK           | pyridoxal (pyridoxine, vitamin B6) kinase                |  | ENST00000476313 | 0,874272461 |
| A_21_P0007320 | THC2496717       | XLOC_009378    |                                                          |  |                 | 0,874016063 |
| A_33_P3416127 | AK093799         | LOC100132800   | uncharacterized LOC100132800                             |  |                 | 0,873934639 |
| A_33_P3404097 | NR_002836        | PGM5P2         | phosphoglucomutase 5 pseudogene 2                        |  | ENST00000428647 | 0,872368218 |
| A_33_P3303748 | NM_017990        | PDPR           | pyruvate dehydrogenase phosphatase regulatory subunit    |  | ENST00000429810 | 0,871992408 |
| A_33_P3256695 | NM_017892        | PRPF40A        | PRP40 pre-mRNA processing factor 40 homolog A (S. cerevi |  | ENST00000410080 | 0,871969681 |
| A_21_P0013977 | ENST00000493650  | PCID2          | PCI domain containing 2                                  |  | ENST00000493650 | 0,871963338 |
| A_33_P3304304 | ENST00000394478  | STAG2          | stromal antigen 2                                        |  | ENST00000394478 | 0,871243283 |
| A_33_P3338634 | NM_001146261     | SYT14          | synaptotagmin XIV                                        |  | ENST00000367019 | 0,871207255 |
| A_21_P0005460 | ENST00000469418  | XLOC_006324    |                                                          |  | ENST00000469418 | 0,870921389 |
| A_21_P0006998 | TCONS_00018521   | XLOC_008828    |                                                          |  |                 | 0,870825645 |
| A_23_P16817   | NM_004071        | CLK1           | CDC-like kinase 1                                        |  | ENST00000496205 | 0,870529115 |
| A_33_P3254013 | ENST00000515868  | GAK            | cyclin G associated kinase                               |  | ENST00000515868 | 0,869499253 |
| A_33_P3383184 | ENST00000394967  | SP9            | Sp9 transcription factor homolog (mouse)                 |  | ENST00000394967 | 0,869398402 |
| A_33_P3334590 | NM_017762        | MTMR10         | myotubularin related protein 10                          |  | ENST00000340566 | 0,868256849 |

|               |                   |                |                                                           |                 |             |
|---------------|-------------------|----------------|-----------------------------------------------------------|-----------------|-------------|
| A_33_P3390027 | ENST00000405068   | EXOC7          | exocyst complex component 7                               | ENST00000405068 | 0,867468763 |
| A_33_P3314436 | NM_001163315      | FBXL17         | F-box and leucine-rich repeat protein 17                  | ENST00000481160 | 0,867097548 |
| A_21_P0012709 | AK098398          | HMP19          | HMP19 protein                                             |                 | 0,867092874 |
| A_21_P0012993 | ENST00000447012   | XLOC_I2_012081 |                                                           | ENST00000447012 | 0,866158684 |
| A_24_P376129  | ENST00000374057   | DFNB31         | deafness, autosomal recessive 31                          | ENST00000374057 | 0,86611387  |
| A_23_P11070   | NM_032553         | GPR174         | G protein-coupled receptor 174                            | ENST00000276077 | 0,865730655 |
| A_21_P0003865 | TCONS_00008948    | XLOC_003802    |                                                           |                 | 0,865620687 |
| A_32_P173298  | NM_012426         | SF3B3          | splicing factor 3b, subunit 3, 130kDa                     | ENST00000310750 | 0,865013945 |
| A_33_P3264780 | NM_001260         | CDK8           | cyclin-dependent kinase 8                                 | ENST00000477290 | 0,863994163 |
| A_23_P13822   | NM_018423         | STYK1          | serine/threonine/tyrosine kinase 1                        | ENST00000075503 | 0,863890345 |
| A_24_P833256  | XR_132625         | LOC100506898   | mago-nashi homolog, proliferation-associated (Drosophila) | pseudogene      | 0,862646113 |
| A_23_P16652   | NM_152791         | ZNF555         | zinc finger protein 555                                   | ENST00000334241 | 0,862436017 |
| A_21_P0014584 | XR_110384         | LOC100507153   | uncharacterized LOC100507153                              |                 | 0,862389445 |
| A_21_P0013746 | TCONS_I2_00030111 | XLOC_I2_015438 |                                                           |                 | 0,862337203 |
| A_33_P3422659 | NM_018972         | GDAP1          | ganglioside-induced differentiation-associated protein 1  |                 | 0,861976842 |
| A_23_P120170  | NM_145702         | TIGD1          | tigger transposable element derived 1                     | ENST00000408957 | 0,861533831 |
| A_23_P34877   | NM_022768         | RBM15          | RNA binding motif protein 15                              | ENST00000487146 | 0,861196175 |
| A_23_P320530  | NM_001010880      | ZNF780A        | zinc finger protein 780A                                  | ENST00000455521 | 0,860553894 |
| A_21_P0000298 | NR_002916         | SNORD8         | small nucleolar RNA, C/D box 8                            |                 | 0,86028554  |
| A_33_P3290443 | NR_002569         | SCARNA9        | small Cajal body-specific RNA 9                           | ENST00000530422 | 0,86020454  |
| A_21_P0006885 | AL353951          | XLOC_008528    |                                                           |                 | 0,860056787 |
| A_21_P0000377 | NR_003054         | SNORD65        | small nucleolar RNA, C/D box 65                           |                 | 0,859841611 |
| A_21_P0000197 | NM_021064         | HIST1H2AG      | histone cluster 1, H2ag                                   | ENST00000359193 | 0,859813133 |
| A_21_P0000730 | NR_038235         | LOC100507651   | uncharacterized LOC100507651                              |                 | 0,859499274 |
| A_21_P0007530 | TCONS_00020350    | XLOC_009681    |                                                           |                 | 0,859290047 |
| A_23_P153767  | NM_014371         | AKAP8L         | A kinase (PRKA) anchor protein 8-like                     | ENST00000397410 | 0,859201148 |
| A_21_P0009088 | TCONS_00024776    | XLOC_012051    |                                                           |                 | 0,858955587 |
| A_33_P3665553 | AK126241          | LOC100233156   | tektin 4 pseudogene                                       |                 | 0,858663365 |
| A_33_P3358943 | NM_000839         | GRM2           | glutamate receptor, metabotropic 2                        | ENST00000464585 | 0,858058472 |

|               |                 |             |                                                           |                 |             |
|---------------|-----------------|-------------|-----------------------------------------------------------|-----------------|-------------|
| A_23_P371682  | NM_005708       | GPC6        | glypican 6                                                | ENST00000377047 | 0,857369264 |
| A_24_P15325   | AJ301560        | XKR6        | XK, Kell blood group complex subunit-related family, memb | ENST00000297303 | 0,856719591 |
| A_23_P4850    | NM_145233       | ZNF625      | zinc finger protein 625                                   | ENST00000439556 | 0,856154856 |
| A_24_P291658  | NM_000667       | ADH1A       | alcohol dehydrogenase 1A (class I), alpha polypeptide     | ENST00000412614 | 0,856057087 |
| A_33_P3247848 | NM_001144989    | ZNF814      | zinc finger protein 814                                   | ENST00000435989 | 0,855954976 |
| A_33_P3212037 | ENST00000369475 | RNGTT       | RNA guanylyltransferase and 5'-phosphatase                | ENST00000369475 | 0,854890567 |
| A_23_P46396   | NM_021190       | PTBP2       | polypyrimidine tract binding protein 2                    | ENST00000394176 | 0,854123303 |
| A_24_P375205  | ENST00000389126 | MKL2        | MKL/myocardin-like 2                                      | ENST00000389126 | 0,853538453 |
| A_23_P167882  | NM_052872       | IL17F       | interleukin 17F                                           | ENST00000478427 | 0,853302779 |
| A_23_P160869  | NM_014813       | LRIG2       | leucine-rich repeats and immunoglobulin-like domains 2    | ENST00000466161 | 0,851723841 |
| A_33_P3326588 | NM_003840       | TNFRSF10D   | tumor necrosis factor receptor superfamily, member 10d, d | ENST00000312584 | 0,851679104 |
| A_33_P3295749 | ENST00000378689 | GLIPR1L2    | GLI pathogenesis-related 1 like 2                         | ENST00000378689 | 0,850792389 |
| A_21_P0002647 | THC2564285      | XLOC_001974 |                                                           |                 | 0,850188048 |
| A_33_P3373892 | ENST00000376040 | NAA35       | N(alpha)-acetyltransferase 35, NatC auxiliary subunit     | ENST00000376040 | 0,849813314 |
| A_33_P3296198 | NM_001164479    | C5orf63     | chromosome 5 open reading frame 63                        | ENST00000418539 | 0,8494774   |
| A_21_P0003061 | ENST00000481679 | NAALADL2    | N-acetylated alpha-linked acidic dipeptidase-like 2       | ENST00000481679 | 0,849371344 |
| A_33_P3311653 | ENST00000507766 | PDS5A       | PDS5, regulator of cohesion maintenance, homolog A (S. ce | ENST00000507766 | 0,848808441 |
| A_32_P151875  | NM_020781       | ZNF398      | zinc finger protein 398                                   | ENST00000426851 | 0,848603795 |
| A_33_P3294961 | ENST00000398475 | LAT2        | linker for activation of T cells family, member 2         | ENST00000398475 | 0,848599097 |
| A_33_P3248863 | NM_213597       | KRBA2       | KRAB-A domain containing 2                                | ENST00000331336 | 0,848263821 |
| A_21_P0005577 | TCONS_00014217  | XLOC_006258 |                                                           |                 | 0,848187566 |
| A_21_P0000483 | NR_003941       | SNORD75     | small nucleolar RNA, C/D box 75                           |                 | 0,847816863 |
| A_23_P385126  | NM_139160       | DEPDC7      | DEP domain containing 7                                   | ENST00000311388 | 0,847282631 |
| A_23_P120170  | NM_145702       | TIGD1       | tigger transposable element derived 1                     | ENST00000408957 | 0,847150181 |
| A_33_P3416301 | NM_198256       | E2F6        | E2F transcription factor 6                                | ENST00000362009 | 0,847036125 |
| A_33_P3411122 | ENST00000489404 | PRPS2       | phosphoribosyl pyrophosphate synthetase 2                 | ENST00000489404 | 0,846325891 |
| A_32_P427222  | ENST00000487979 | HEATR7B1    | HEAT repeat containing 7B1                                | ENST00000487979 | 0,846178629 |
| A_21_P0004619 | ENST00000414364 | XLOC_005927 |                                                           | ENST00000414364 | 0,846151895 |
| A_21_P0000270 | NR_002586       | SNORA63     | small nucleolar RNA, H/ACA box 63                         | ENST00000494445 | 0,845878484 |



|               |                  |                |                                                             |                 |             |
|---------------|------------------|----------------|-------------------------------------------------------------|-----------------|-------------|
| A_23_P46690   | NM_203376        | TMEM81         | transmembrane protein 81                                    | ENST00000367167 | 0,84571556  |
| A_33_P3299421 | NM_020880        | ZNF530         | zinc finger protein 530                                     | ENST00000332854 | 0,845324641 |
| A_33_P3233764 | NM_004690        | LATS1          | LATS, large tumor suppressor, homolog 1 (Drosophila)        | ENST00000392273 | 0,844722641 |
| A_33_P3651282 | ENST00000546204  | TCP1           | t-complex 1                                                 | ENST00000546204 | 0,844559848 |
| A_32_P140706  | NM_000535        | PMS2           | PMS2 postmeiotic segregation increased 2 (S. cerevisiae)    | ENST00000338780 | 0,843855744 |
| A_33_P3323347 | NM_152475        | ZNF417         | zinc finger protein 417                                     | ENST00000312026 | 0,843838404 |
| A_21_P0014690 | XR_111671        | LOC100508869   | uncharacterized LOC100508869                                |                 | 0,843597822 |
| A_33_P3420496 | NR_003015        | SNORA53        | small nucleolar RNA, H/ACA box 53                           |                 | 0,841748408 |
| A_23_P91850   | NM_144717        | IL20RB         | interleukin 20 receptor beta                                | ENST00000475972 | 0,841388131 |
| A_33_P3327697 | NR_027046        | LOC145474      | uncharacterized LOC145474                                   |                 | 0,841305128 |
| A_23_P100420  | NM_015144        | ZCCHC14        | zinc finger, CCHC domain containing 14                      | ENST00000268616 | 0,840120928 |
| A_33_P3302676 | ENST00000485159  | TLE4           | transducin-like enhancer of split 4 (E(sp1) homolog, Drosop | ENST00000485159 | 0,839378025 |
| A_23_P101811  | NM_021030        | ZNF14          | zinc finger protein 14                                      | ENST00000344099 | 0,839152859 |
| A_21_P0002938 | TCONS_00005966   | XLOC_002597    |                                                             |                 | 0,839037716 |
| A_21_P0008352 | ENST00000553944  | XLOC_010859    |                                                             | ENST00000553944 | 0,837943136 |
| A_33_P3353030 | NM_003353        | UCN            | urocortin                                                   | ENST00000296099 | 0,837861308 |
| A_21_P0011312 | TCONS_I2_0000854 | XLOC_I2_004611 |                                                             |                 | 0,837640377 |
| A_21_P0006454 | AK128305         | FLJ46446       | uncharacterized LOC441501                                   |                 | 0,837544877 |
| A_21_P0001152 | ENST00000436200  | XLOC_000918    |                                                             | ENST00000436200 | 0,836637418 |
| A_33_P3389478 | ENST00000380799  | SNAPC3         | small nuclear RNA activating complex, polypeptide 3, 50kDa  | ENST00000380799 | 0,836414944 |
| A_33_P3319810 | NM_152698        | FAM123C        | family with sequence similarity 123C                        | ENST00000423981 | 0,836401045 |
| A_21_P0014261 | XR_109038        | LOC100507128   | uncharacterized LOC100507128                                |                 | 0,835556788 |
| A_33_P3366859 | NM_001187        | BAGE           | B melanoma antigen                                          | ENST00000470054 | 0,835329884 |
| A_21_P0003480 | ENST00000510744  | XLOC_003988    |                                                             | ENST00000510744 | 0,833876874 |
| A_21_P0006532 | TCONS_00017313   | XLOC_008149    |                                                             |                 | 0,833534441 |
| A_23_P372860  | NM_003512        | HIST1H2AC      | histone cluster 1, H2ac                                     | ENST00000377791 | 0,833304091 |
| A_21_P0011931 | NM_170606        | MLL3           | myeloid/lymphoid or mixed-lineage leukemia 3                | ENST00000436174 | 0,832521526 |
| A_23_P100420  | NM_015144        | ZCCHC14        | zinc finger, CCHC domain containing 14                      | ENST00000268616 | 0,832486584 |
| A_21_P0007676 | TCONS_00020667   | XLOC_009971    |                                                             |                 | 0,832313749 |

|               |                 |                |                                                              |                 |             |
|---------------|-----------------|----------------|--------------------------------------------------------------|-----------------|-------------|
| A_33_P3299386 | NM_001039654    | ZNF550         | zinc finger protein 550                                      | ENST00000506609 | 0,831855017 |
| A_21_P0014437 | XR_109797       | LOC100505930   | uncharacterized LOC100505930                                 |                 | 0,831839846 |
| A_33_P3397795 | AK095489        | C14orf135      | chromosome 14 open reading frame 135                         | ENST00000406949 | 0,831305973 |
| A_24_P321634  | NM_001039650    | ZMYM5          | zinc finger, MYM-type 5                                      | ENST00000467542 | 0,831265193 |
| A_23_P100420  | NM_015144       | ZCCHC14        | zinc finger, CCHC domain containing 14                       | ENST00000268616 | 0,83109225  |
| A_23_P100420  | NM_015144       | ZCCHC14        | zinc finger, CCHC domain containing 14                       | ENST00000268616 | 0,830693435 |
| A_33_P3361811 | NM_024561       | NAA16          | N(alpha)-acetyltransferase 16, NatA auxiliary subunit        | ENST00000379367 | 0,830385128 |
| A_33_P3276455 | NM_006618       | KDM5B          | lysine (K)-specific demethylase 5B                           | ENST00000543924 | 0,829997046 |
| A_21_P0014061 | ENST00000445098 | NCRNA00083     |                                                              | ENST00000445098 | 0,829380097 |
| A_21_P0010480 | TCONS_00029924  | XLOC_014399    |                                                              |                 | 0,829238042 |
| A_21_P0000279 | NR_002735       | SNORD61        | small nucleolar RNA, C/D box 61                              |                 | 0,828381792 |
| A_23_P101811  | NM_021030       | ZNF14          | zinc finger protein 14                                       | ENST00000344099 | 0,827958635 |
| A_33_P3374952 | NM_173484       | KLF17          | Kruppel-like factor 17                                       | ENST00000372299 | 0,827907909 |
| A_21_P0000244 | NR_002440       | SNORD16        | small nucleolar RNA, C/D box 16                              |                 | 0,827796016 |
| A_23_P101811  | NM_021030       | ZNF14          | zinc finger protein 14                                       | ENST00000344099 | 0,826768901 |
| A_21_P0007057 | NR_024497       | LOC399744      | uncharacterized LOC399744                                    | ENST00000423687 | 0,826693391 |
| A_33_P3224483 | BC020495        | RABL2B         | RAB, member of RAS oncogene family-like 2B                   | ENST00000395590 | 0,826503683 |
| A_33_P3305770 | ENST00000389311 | NBR1           | neighbor of BRCA1 gene 1                                     | ENST00000389311 | 0,826429399 |
| A_23_P20480   | NM_018310       | BRF2           | BRF2, subunit of RNA polymerase III transcription initiation | ENST00000220659 | 0,826426454 |
| A_23_P323943  | NM_178498       | SLC5A12        | solute carrier family 5 (sodium/glucose cotransporter), mer  | ENST00000280467 | 0,826343298 |
| A_32_P139738  | NR_002827       | HERC2P4        | hect domain and RLD 2 pseudogene 4                           |                 | 0,826144444 |
| A_23_P100420  | NM_015144       | ZCCHC14        | zinc finger, CCHC domain containing 14                       | ENST00000268616 | 0,825926466 |
| A_21_P0010684 | ENST00000457084 | XLOC_l2_000010 |                                                              | ENST00000457084 | 0,825824088 |
| A_23_P100420  | NM_015144       | ZCCHC14        | zinc finger, CCHC domain containing 14                       | ENST00000268616 | 0,825618478 |
| A_32_P37592   | NR_003003       | SCARNA17       | small Cajal body-specific RNA 17                             |                 | 0,825544967 |
| A_33_P3288357 | ENST00000373293 | C9orf117       | chromosome 9 open reading frame 117                          | ENST00000373293 | 0,82514048  |
| A_21_P0000227 | NR_001285       | SNORD35B       | small nucleolar RNA, C/D box 35B                             |                 | 0,824571369 |
| A_24_P101047  | NM_020931       | KIAA1586       | KIAA1586                                                     | ENST00000545356 | 0,824198119 |
| A_33_P3345608 | NM_001202438    | C10orf137      | chromosome 10 open reading frame 137                         | ENST00000392732 | 0,82372278  |

|                |                                  |              |                                                          |                 |             |
|----------------|----------------------------------|--------------|----------------------------------------------------------|-----------------|-------------|
| A_21_P0013194  | NR_039983                        | LOC729737    | uncharacterized LOC729737                                | ENST00000423728 | 0,823397422 |
| A_33_P3387566  | NR_026770                        | C17orf88     | chromosome 17 open reading frame 88                      | ENST00000458392 | 0,823213346 |
| A_23_P108932   | NR_002229                        | RPL23AP32    | ribosomal protein L23a pseudogene 32                     |                 | 0,823093205 |
| A_21_P0000037  | NM_001163391                     | ZSCAN12      | zinc finger and SCAN domain containing 12                |                 | 0,822712045 |
| A_33_P3236267  | NM_172239                        | REXO1L1      | REX1, RNA exonuclease 1 homolog (S. cerevisiae)-like 1   | ENST00000505089 | 0,822243318 |
| A_33_P3251821  | NR_003545                        | C5orf44      | chromosome 5 open reading frame 44                       | ENST00000510585 | 0,821857    |
| A_24_P48403    | NM_005433                        | YES1         | v-yes-1 Yamaguchi sarcoma viral oncogene homolog 1       | ENST00000314574 | 0,821706659 |
| A_33_P3235706  | BC048301                         | ZCCHC11      | zinc finger, CCHC domain containing 11                   | ENST00000355809 | 0,821177531 |
| A_24_P942017   | NR_034127                        | LOC100132356 | uncharacterized LOC100132356                             |                 | 0,821102    |
| A_33_P3318946  | NM_021817                        | HAPLN2       | hyaluronan and proteoglycan link protein 2               | ENST00000255039 | 0,820332855 |
| A_33_P3351934  | NR_024117                        | MSTO2P       | misato homolog 2 pseudogene                              |                 | 0,820303329 |
| A_33_P3270172  | NR_027022                        | LOC127841    | uncharacterized LOC127841                                |                 | 0,820234806 |
| A_33_P3384667  | BC022967                         | DCAF5        | DDB1 and CUL4 associated factor 5                        | ENST00000389997 | 0,820120497 |
| A_23_P101811   | NM_021030                        | ZNF14        | zinc finger protein 14                                   | ENST00000344099 | 0,819797526 |
| A_32_P430695   | NM_178339                        | C3orf35      | chromosome 3 open reading frame 35                       | ENST00000452017 | 0,819596235 |
| A_33_P3219720  | ENST00000485560                  | ZNF248       | zinc finger protein 248                                  | ENST00000485560 | 0,819572597 |
| A_24_P456723   | NR_038386                        | LOC728537    | uncharacterized LOC728537                                | ENST00000451384 | 0,81952631  |
| A_23_P369328   | NM_145306                        | C10orf35     | chromosome 10 open reading frame 35                      | ENST00000373279 | 0,81906127  |
| A_23_P120170   | NM_145702                        | TIGD1        | tigger transposable element derived 1                    | ENST00000408957 | 0,818773429 |
| A_23_P101811   | NM_021030                        | ZNF14        | zinc finger protein 14                                   | ENST00000344099 | 0,818671076 |
| A_21_P0013308  | TCONS_I2_0002659; XLOC_I2_013846 |              |                                                          |                 | 0,818566136 |
| A_23_P115161   | NM_002036                        | DARC         | Duffy blood group, chemokine receptor                    | ENST00000435307 | 0,817729712 |
| A_21_P0000245  | NR_002441                        | SNORD18A     | small nucleolar RNA, C/D box 18A                         |                 | 0,817212704 |
| A_23_P100420   | NM_015144                        | ZCCHC14      | zinc finger, CCHC domain containing 14                   | ENST00000268616 | 0,816878453 |
| A_23_P100420   | NM_015144                        | ZCCHC14      | zinc finger, CCHC domain containing 14                   | ENST00000268616 | 0,816466187 |
| A_33_P3421219  | AK001442                         | LOC647070    | uncharacterized LOC647070                                |                 | 0,816464163 |
| A_19_P00315826 | EF413001                         | XLOC_001148  |                                                          |                 | 0,816212134 |
| A_23_P107283   | NM_002145                        | HOXB2        | homeobox B2                                              | ENST00000330070 | 0,815929747 |
| A_23_P26386    | NM_016140                        | TPPP3        | tubulin polymerization-promoting protein family member 3 | ENST00000290942 | 0,815908707 |

|               |                  |                |                                                               |                 |             |
|---------------|------------------|----------------|---------------------------------------------------------------|-----------------|-------------|
| A_21_P0014601 | ENST00000466213  | SFPQ           | splicing factor proline/glutamine-rich                        | ENST00000466213 | 0,815616324 |
| A_23_P251785  | NM_024561        | NAA16          | N(alpha)-acetyltransferase 16, NatA auxiliary subunit         | ENST00000379406 | 0,815069282 |
| A_21_P0002348 | TCONS_00004017   | XLOC_001856    |                                                               |                 | 0,814863841 |
| A_23_P124946  | NM_153610        | CMYA5          | cardiomyopathy associated 5                                   | ENST00000446378 | 0,81426021  |
| A_33_P3224307 | NR_003010        | SCARNA12       | small Cajal body-specific RNA 12                              | ENST00000537646 | 0,814207896 |
| A_21_P0005632 | AK130001         | XLOC_006857    |                                                               |                 | 0,81396676  |
| A_23_P160004  | NM_182660        | UTY            | ubiquitously transcribed tetratricopeptide repeat gene, Y-lir | ENST00000545955 | 0,813871892 |
| A_21_P0000486 | NR_004054        | SNORD103A      | small nucleolar RNA, C/D box 103A                             |                 | 0,813440242 |
| A_23_P100420  | NM_015144        | ZCCHC14        | zinc finger, CCHC domain containing 14                        | ENST00000268616 | 0,813122653 |
| A_21_P0000337 | NR_002983        | SNORA55        | small nucleolar RNA, H/ACA box 55                             |                 | 0,812826117 |
| A_33_P3267460 | NM_134428        | RFX3           | regulatory factor X, 3 (influences HLA class II expression)   | ENST00000381984 | 0,812459206 |
| A_23_P169494  | NM_000607        | ORM1           | orosomuroid 1                                                 | ENST00000477456 | 0,812403701 |
| A_24_P194748  | NM_001080485     | ZNF275         | zinc finger protein 275                                       | ENST00000421401 | 0,812314492 |
| A_32_P182388  | NM_021217        | ZNF77          | zinc finger protein 77                                        | ENST00000314531 | 0,812298603 |
| A_21_P0000388 | NR_003072        | SNORD91A       | small nucleolar RNA, C/D box 91A                              |                 | 0,812271636 |
| A_21_P0012262 | TCONS_I2_0001765 | XLOC_I2_009331 |                                                               |                 | 0,812133333 |
| A_21_P0003331 | ENST00000418666  | XLOC_003427    |                                                               | ENST00000418666 | 0,812024975 |
| A_21_P0001551 | THC2675475       | XLOC_000922    |                                                               |                 | 0,8119605   |
| A_21_P0001880 | ENST00000453951  | XLOC_001537    |                                                               | ENST00000453951 | 0,811505774 |
| A_21_P0001725 | ENST00000424948  | XLOC_000808    |                                                               | ENST00000424948 | 0,811499481 |
| A_23_P301984  | NM_001007090     | C8orf48        | chromosome 8 open reading frame 48                            | ENST00000297324 | 0,810980341 |
| A_33_P3251841 | NM_032160        | DSEL           | dermatan sulfate epimerase-like                               | ENST00000397964 | 0,810744219 |
| A_21_P0000339 | NR_002985        | SNORA58        | small nucleolar RNA, H/ACA box 58                             |                 | 0,810581391 |
| A_21_P0011463 | NM_015092        | SMG1           | smg-1 homolog, phosphatidylinositol 3-kinase-related kinas    | ENST00000447140 | 0,81031189  |
| A_21_P0011465 | NM_015092        | SMG1           | smg-1 homolog, phosphatidylinositol 3-kinase-related kinas    | ENST00000447140 | 0,809633453 |
| A_33_P3366141 | AK094244         | LOC100130269   | uncharacterized LOC100130269                                  |                 | 0,809433789 |
| A_21_P0010949 | ENST00000420424  | XLOC_I2_002033 |                                                               | ENST00000420424 | 0,809064631 |
| A_23_P308673  | NM_004783        | TAOK2          | TAO kinase 2                                                  | ENST00000279394 | 0,808214405 |
| A_33_P3232204 | XR_110259        | LOC100128343   | uncharacterized LOC100128343                                  |                 | 0,807906573 |

|               |                |              |                                                             |                 |             |
|---------------|----------------|--------------|-------------------------------------------------------------|-----------------|-------------|
| A_23_P85269   | NM_133378      | TTN          | titin                                                       | ENST00000356127 | 0,80709003  |
| A_21_P0010476 | THC2660954     | XLOC_014336  |                                                             |                 | 0,806877801 |
| A_23_P354894  | NM_152603      | ZNF567       | zinc finger protein 567                                     | ENST00000360729 | 0,806796874 |
| A_21_P0000296 | NR_002913      | SNORD63      | small nucleolar RNA, C/D box 63                             |                 | 0,806673999 |
| A_33_P3217490 | NR_038388      | LOC729444    | uncharacterized LOC729444                                   | ENST00000415704 | 0,80594117  |
| A_33_P3321275 | NM_170606      | MLL3         | myeloid/lymphoid or mixed-lineage leukemia 3                | ENST00000436174 | 0,805736898 |
| A_33_P3210160 | NM_001195605   | ZNF865       | zinc finger protein 865                                     | ENST00000443271 | 0,805512478 |
| A_33_P3326812 | AK127768       | LOC100130152 | uncharacterized LOC100130152                                |                 | 0,805235951 |
| A_33_P3302423 | NM_001142640   | TNRC6C       | trinucleotide repeat containing 6C                          | ENST00000335749 | 0,80504209  |
| A_33_P3800496 | BX470739       | SNORA46      | small nucleolar RNA, H/ACA box 46                           |                 | 0,804948355 |
| A_24_P170774  | NM_015116      | LRCH1        | leucine-rich repeats and calponin homology (CH) domain cc   | ENST00000389798 | 0,80480158  |
| A_32_P34920   | NM_004472      | FOXD1        | forkhead box D1                                             |                 | 0,804681452 |
| A_23_P101811  | NM_021030      | ZNF14        | zinc finger protein 14                                      | ENST00000344099 | 0,804414985 |
| A_21_P0000282 | NR_002739      | SNORD56      | small nucleolar RNA, C/D box 56                             | ENST00000413522 | 0,804274919 |
| A_33_P3218138 | NM_000937      | POLR2A       | polymerase (RNA) II (DNA directed) polypeptide A, 220kDa    | ENST00000322644 | 0,804022623 |
| A_21_P0003792 | TCONS_00008639 | XLOC_004144  |                                                             |                 | 0,803746966 |
| A_21_P0009344 | TCONS_00025725 | XLOC_012542  |                                                             |                 | 0,803707787 |
| A_33_P3242923 | NR_038358      | LOC283553    | uncharacterized LOC283553                                   | ENST00000554409 | 0,80284032  |
| A_23_P100420  | NM_015144      | ZCCHC14      | zinc finger, CCHC domain containing 14                      | ENST00000268616 | 0,802832477 |
| A_33_P3239654 | AK056727       | HCG4B        | HLA complex group 4B (non-protein coding)                   |                 | 0,802711478 |
| A_24_P341923  | NM_020964      | EPG5         | ectopic P-granules autophagy protein 5 homolog (C. elegans) | ENST00000308403 | 0,802420737 |
| A_21_P0000358 | NR_003017      | SNORA71C     | small nucleolar RNA, H/ACA box 71C                          |                 | 0,802032136 |
| A_33_P3388491 | NM_001040125   | PQLC2        | PQ loop repeat containing 2                                 | ENST00000375153 | 0,800109254 |
| A_21_P0012877 | NR_033908      | LOC100288069 | general transcription factor Ili pseudogene                 | ENST00000491962 | 0,799978082 |
| A_24_P102920  | NM_001006622   | WDR33        | WD repeat domain 33                                         | ENST00000409658 | 0,799067601 |
| A_21_P0005609 | NR_024586      | LOC100216545 | uncharacterized LOC100216545                                |                 | 0,799058222 |
| A_23_P45955   | NM_014466      | TEKT2        | tektin 2 (testicular)                                       | ENST00000469024 | 0,799027543 |
| A_33_P3252068 | NM_030647      | JHDM1D       | jumonji C domain containing histone demethylase 1 homolog   | ENST00000006967 | 0,798849821 |
| A_32_P178945  | NM_018566      | YOD1         | YOD1 OTU deubiquinating enzyme 1 homolog (S. cerevisiae)    | ENST00000367084 | 0,798652705 |



|                |                  |                |                                                             |                 |             |
|----------------|------------------|----------------|-------------------------------------------------------------|-----------------|-------------|
| A_21_P0000983  | ENST00000449140  | XLOC_000233    |                                                             | ENST00000449140 | 0,798494252 |
| A_33_P3293169  | NM_017749        | AMBRA1         | autophagy/beclin-1 regulator 1                              | ENST00000314823 | 0,798272781 |
| A_21_P0000352  | NR_003005        | SCARNA4        | small Cajal body-specific RNA 4                             |                 | 0,798205051 |
| A_23_P101811   | NM_021030        | ZNF14          | zinc finger protein 14                                      | ENST00000344099 | 0,797958613 |
| A_23_P114353   | NM_032946        | NXF5           | nuclear RNA export factor 5                                 | ENST00000263032 | 0,797450807 |
| A_33_P3227217  | NR_002989        | SNORA81        | small nucleolar RNA, H/ACA box 81                           | ENST00000475409 | 0,796521285 |
| A_23_P389897   | NM_002507        | NGFR           | nerve growth factor receptor                                | ENST00000172229 | 0,795627606 |
| A_23_P55880    | NM_144976        | ZNF564         | zinc finger protein 564                                     | ENST00000339282 | 0,795020078 |
| A_33_P3345743  | NR_003242        | PFN1P2         | profilin 1 pseudogene 2                                     |                 | 0,794523956 |
| A_21_P0011462  | TCONS_I2_0001008 | XLOC_I2_005438 |                                                             |                 | 0,794202956 |
| A_21_P0000224  | NR_000027        | SNORD83A       | small nucleolar RNA, C/D box 83A                            |                 | 0,793461311 |
| A_23_P252306   | NM_002165        | ID1            | inhibitor of DNA binding 1, dominant negative helix-loop-he | ENST00000376105 | 0,793299196 |
| A_21_P0009055  | THC2604051       | XLOC_012003    |                                                             |                 | 0,792776733 |
| A_21_P0000294  | NR_002910        | SNORA71B       | small nucleolar RNA, H/ACA box 71B                          |                 | 0,792748065 |
| A_19_P00315649 | ENST00000530955  | LOC100507165   |                                                             | ENST00000530955 | 0,792400056 |
| A_33_P3367795  | ENST00000380381  | RPS6           | ribosomal protein S6                                        | ENST00000380381 | 0,791719313 |
| A_21_P0012166  | BC039367         | XLOC_I2_008910 |                                                             |                 | 0,791688071 |
| A_24_P145911   | ENST00000342294  | TRA2B          | transformer 2 beta homolog (Drosophila)                     | ENST00000342294 | 0,790972881 |
| A_33_P3254431  | AK054818         | C1orf86        | chromosome 1 open reading frame 86                          |                 | 0,790877915 |
| A_33_P3334292  | AK123006         | PPIAL4G        | peptidylprolyl isomerase A (cyclophilin A)-like 4G          |                 | 0,790497579 |
| A_33_P3287879  | NM_003536        | HIST1H3H       | histone cluster 1, H3h                                      | ENST00000369163 | 0,789889899 |
| A_24_P941708   | NM_001042417     | RUFY2          | RUN and FYVE domain containing 2                            | ENST00000399200 | 0,789627028 |
| A_23_P347508   | NM_023077        | SELRC1         | Sel1 repeat containing 1                                    | ENST00000371538 | 0,789559964 |
| A_21_P0000375  | NR_003047        | SNORD19        | small nucleolar RNA, C/D box 19                             |                 | 0,789240933 |
| A_33_P3398181  | XR_111781        | LOC100127909   | uncharacterized LOC100127909                                |                 | 0,789157197 |
| A_33_P3262665  | NM_024597        | MAP7D3         | MAP7 domain containing 3                                    | ENST00000370663 | 0,789128518 |
| A_23_P92672    | NM_002538        | OCLN           | occludin                                                    | ENST00000514370 | 0,788725889 |
| A_21_P0010774  | THC2542300       | XLOC_I2_001091 |                                                             |                 | 0,787931904 |
| A_33_P3233834  | NM_001190981     | IL6ST          | interleukin 6 signal transducer (gp130, oncostatin M recept | ENST00000542298 | 0,787726005 |

|                |                  |                |                                                      |                 |             |
|----------------|------------------|----------------|------------------------------------------------------|-----------------|-------------|
| A_33_P3226542  | NR_003271        | SNORD3B-1      | small nucleolar RNA, C/D box 3B-1                    |                 | 0,787104082 |
| A_21_P0010959  | TCONS_I2_0000433 | XLOC_I2_002194 |                                                      |                 | 0,7865424   |
| A_24_P120109   | NM_198963        | DHX57          | DEAH (Asp-Glu-Ala-Asp/His) box polypeptide 57        | ENST00000355320 | 0,786297758 |
| A_33_P3262485  | NM_145276        | ZNF563         | zinc finger protein 563                              | ENST00000293725 | 0,785853556 |
| A_23_P45913    | NM_004814        | SNRNP40        | small nuclear ribonucleoprotein 40kDa (U5)           | ENST00000474025 | 0,785642511 |
| A_33_P3245454  | NR_027420        | LOC389834      | ankyrin repeat domain 57 pseudogene                  |                 | 0,78553047  |
| A_33_P3214432  | NM_080660        | ZC3HAV1L       | zinc finger CCCH-type, antiviral 1-like              | ENST00000358573 | 0,78552616  |
| A_23_P97700    | NM_006472        | TXNIP          | thioredoxin interacting protein                      | ENST00000475171 | 0,785041389 |
| A_21_P0007203  | TCONS_00019285   | XLOC_009118    |                                                      |                 | 0,784518634 |
| A_19_P00315493 | NR_027046        | LOC145474      | uncharacterized LOC145474                            |                 | 0,784393725 |
| A_21_P0014925  | DA569430         | LOC100505857   |                                                      |                 | 0,784098904 |
| A_33_P3292179  | NM_080283        | ABCA9          | ATP-binding cassette, sub-family A (ABC1), member 9  | ENST00000370732 | 0,7840687   |
| A_21_P0014046  | XM_003403783     | LOC100653120   | uncharacterized LOC100653120                         |                 | 0,783757648 |
| A_21_P0014806  | XR_132626        | LOC100507131   | uncharacterized LOC100507131                         |                 | 0,783484822 |
| A_33_P3262133  | ENST00000312756  | GFM1           | G elongation factor, mitochondrial 1                 | ENST00000312756 | 0,783257358 |
| A_21_P0000316  | NR_002960        | SNORA20        | small nucleolar RNA, H/ACA box 20                    |                 | 0,783025285 |
| A_23_P308954   | NM_030639        | BHLHB9         | basic helix-loop-helix domain containing, class B, 9 | ENST00000457056 | 0,783014942 |
| A_23_P101811   | NM_021030        | ZNF14          | zinc finger protein 14                               | ENST00000344099 | 0,782888463 |
| A_32_P118847   | NR_021491        | FLJ42709       | uncharacterized LOC441094                            |                 | 0,782756477 |
| A_21_P0003179  | TCONS_00006667   | XLOC_003263    |                                                      |                 | 0,78242274  |
| A_33_P3286002  | AK125618         | VKORC1         | vitamin K epoxide reductase complex, subunit 1       | ENST00000394971 | 0,782031438 |
| A_23_P45424    | NM_012278        | ITGB1BP2       | integrin beta 1 binding protein (melusin) 2          | ENST00000373829 | 0,781960421 |
| A_24_P37887    | NM_199243        | GPR150         | G protein-coupled receptor 150                       | ENST00000380007 | 0,78179247  |
| A_33_P3257568  | ENST00000373851  | CNTRL          | centriolin                                           | ENST00000373851 | 0,781620851 |
| A_19_P00321166 | NR_034127        | LOC100132356   | uncharacterized LOC100132356                         |                 | 0,781393006 |
| A_21_P0013793  | NM_014675        | CROCC          | ciliary rootlet coiled-coil, rootletin               | ENST00000467715 | 0,78138612  |
| A_24_P9321     | NM_003533        | HIST1H3I       | histone cluster 1, H3i                               | ENST00000328488 | 0,781085919 |
| A_33_P3212909  | NM_033400        | ZFHX2          | zinc finger homeobox 2                               | ENST00000382785 | 0,781057522 |
| A_33_P3385765  | NM_001012753     | ZNF763         | zinc finger protein 763                              |                 | 0,780667179 |

|                |                 |                |                                                                 |                 |             |
|----------------|-----------------|----------------|-----------------------------------------------------------------|-----------------|-------------|
| A_33_P3356245  | NM_017879       | ZNF416         | zinc finger protein 416                                         | ENST00000359489 | 0,780633195 |
| A_19_P00317449 | NM_178549       | ZNF678         |                                                                 |                 | 0,780319725 |
| A_33_P3290296  | AK125829        | LOC100130175   | uncharacterized LOC100130175                                    |                 | 0,780132012 |
| A_21_P0008072  | TCONS_00021811  | XLOC_010411    |                                                                 |                 | 0,780030037 |
| A_21_P0008120  | TCONS_00021907  | XLOC_010502    |                                                                 |                 | 0,77977437  |
| A_23_P101811   | NM_021030       | ZNF14          | zinc finger protein 14                                          | ENST00000344099 | 0,779339049 |
| A_21_P0012944  | NR_024054       | LOC100170939   | glucuronidase, beta pseudogene                                  |                 | 0,779273782 |
| A_21_P0000313  | NR_002957       | SNORA15        | small nucleolar RNA, H/ACA box 15                               |                 | 0,779176599 |
| A_33_P3537875  | BC004943        | MGC10814       | uncharacterized protein MGC10814                                |                 | 0,77912009  |
| A_23_P108932   | NR_002229       | RPL23AP32      | ribosomal protein L23a pseudogene 32                            |                 | 0,779023579 |
| A_23_P101476   | NM_030824       | ZNF442         | zinc finger protein 442                                         | ENST00000242804 | 0,77856576  |
| A_21_P0000233  | NR_001456       | SNORD38A       | small nucleolar RNA, C/D box 38A                                |                 | 0,778385895 |
| A_24_P941376   | NM_015428       | ZNF473         | zinc finger protein 473                                         | ENST00000270617 | 0,778243517 |
| A_33_P3375451  | NM_025081       | NYNRIN         | NYN domain and retroviral integrase containing                  | ENST00000206466 | 0,778146945 |
| A_21_P0014833  | XR_132691       | LOC100507209   | uncharacterized LOC100507209                                    |                 | 0,778143053 |
| A_33_P3421748  | ENST00000381679 | SON            | SON DNA binding protein                                         | ENST00000381679 | 0,778117641 |
| A_21_P0000751  | NR_038286       | LOC100507062   | uncharacterized LOC100507062                                    | ENST00000472046 | 0,778059526 |
| A_33_P3877728  | BX647090        | SMCR6          | Smith-Magenis syndrome chromosome region, candidate 6           |                 | 0,777540062 |
| A_23_P101811   | NM_021030       | ZNF14          | zinc finger protein 14                                          | ENST00000344099 | 0,777412291 |
| A_21_P0000221  | NR_000021       | SNORD32A       | small nucleolar RNA, C/D box 32A                                | ENST00000486930 | 0,777335215 |
| A_32_P387648   | NM_002016       | FLG            | filaggrin                                                       | ENST00000368799 | 0,77688861  |
| A_33_P3376379  | NM_001139459    | CNST           | consortin, connexin sorting protein                             | ENST00000366511 | 0,776756659 |
| A_33_P3272808  | NM_017952       | PTCD3          | Pentatricopeptide repeat domain 3                               | ENST00000254630 | 0,776668112 |
| A_24_P29594    | NM_006620       | HBS1L          | HBS1-like ( <i>S. cerevisiae</i> )                              | ENST00000367837 | 0,776276645 |
| A_21_P0009820  | ENST00000422519 | XLOC_013737    |                                                                 | ENST00000422519 | 0,77617051  |
| A_23_P111395   | NM_003058       | SLC22A2        | solute carrier family 22 (organic cation transporter), member 2 | ENST00000498556 | 0,776012974 |
| A_21_P0012980  | ENST00000508395 | XLOC_I2_011987 |                                                                 | ENST00000508395 | 0,775863536 |
| A_21_P0000260  | NR_002571       | SNORD58A       | small nucleolar RNA, C/D box 58A                                |                 | 0,775286035 |
| A_33_P3252333  | NR_003271       | SNORD3B-1      | small nucleolar RNA, C/D box 3B-1                               |                 | 0,775230337 |

|                |                 |                |                                                                   |                 |             |
|----------------|-----------------|----------------|-------------------------------------------------------------------|-----------------|-------------|
| A_33_P3284552  | AK023303        | COPE           | coatomer protein complex, subunit epsilon                         |                 | 0,775200963 |
| A_33_P3211260  | AB209486        | DBNL           | drebrin-like                                                      |                 | 0,775179953 |
| A_33_P3559138  | AK124194        | FLJ42200       | FLJ42200 protein                                                  |                 | 0,775147564 |
| A_33_P3346552  | NR_003287       | RN28S1         | RNA, 28S ribosomal 1                                              |                 | 0,775110443 |
| A_32_P226009   | NM_023073       | C5orf42        | chromosome 5 open reading frame 42                                | ENST00000505431 | 0,774781475 |
| A_33_P3356031  | ENST00000367538 | SMG7           | smg-7 homolog, nonsense mediated mRNA decay factor (C.            | ENST00000367538 | 0,774507521 |
| A_33_P3404676  | ENST00000371958 | AMOT           | angiomin                                                          | ENST00000371958 | 0,774300907 |
| A_21_P0010926  | ENST00000438082 | XLOC_l2_001667 |                                                                   | ENST00000438082 | 0,774213642 |
| A_33_P3278911  | NM_032205       | PHF20L1        | PHD finger protein 20-like 1                                      | ENST00000395382 | 0,773607504 |
| A_33_P3220437  | NM_001167942    | TNFAIP8L1      | tumor necrosis factor, alpha-induced protein 8-like 1             | ENST00000536716 | 0,773110859 |
| A_21_P0006020  | ENST00000455583 | XLOC_007413    |                                                                   | ENST00000455583 | 0,772841809 |
| A_23_P18055    | NR_024615       | C3orf51        | chromosome 3 open reading frame 51                                |                 | 0,772617932 |
| A_21_P0000208  | NR_000008       | SNORD22        | small nucleolar RNA, C/D box 22                                   |                 | 0,772603758 |
| A_33_P3265159  | BC110990        | GAPVD1         | GTPase activating protein and VPS9 domains 1                      | ENST00000394084 | 0,772222692 |
| A_21_P0000291  | NR_002751       | SNORD41        | small nucleolar RNA, C/D box 41                                   |                 | 0,771289777 |
| A_23_P138805   | NM_012124       | CHORDC1        | cysteine and histidine-rich domain (CHORD) containing 1           | ENST00000533724 | 0,771236706 |
| A_19_P00809119 | NR_015410       | LINC00340      | long intergenic non-protein coding RNA 340                        | ENST00000444265 | 0,771027696 |
| A_33_P3294031  | NR_002728       | KCNQ1OT1       | KCNQ1 opposite strand/antisense transcript 1 (non-protein coding) |                 | 0,770861988 |
| A_32_P64200    | NM_002098       | GUCA1B         | guanylate cyclase activator 1B (retina)                           |                 | 0,770224063 |
| A_21_P0000820  | NR_038854       | LOC100506668   | uncharacterized LOC100506668                                      |                 | 0,769976191 |
| A_21_P0010562  | NR_027002       | LOC388692      | uncharacterized LOC388692                                         |                 | 0,769958136 |
| A_23_P101476   | NM_030824       | ZNF442         | zinc finger protein 442                                           | ENST00000242804 | 0,769705902 |
| A_23_P131348   | NM_025264       | THUMPD2        | THUMP domain containing 2                                         | ENST00000530095 | 0,769384599 |
| A_23_P115246   | NM_003665       | FCN3           | ficolin (collagen/fibrinogen domain containing) 3 (Hakata ar      | ENST00000270879 | 0,768217633 |
| A_23_P147070   | ENST00000340926 | SUN1           | Sad1 and UNC84 domain containing 1                                | ENST00000340926 | 0,768035075 |
| A_33_P3401262  | NM_001097611    | KNCN           | kinocilin                                                         | ENST00000396314 | 0,767924993 |
| A_33_P3287690  | ENST00000551483 | CNOT2          | CCR4-NOT transcription complex, subunit 2                         | ENST00000551483 | 0,767725683 |
| A_33_P3316310  | NM_182501       | MTERFD2        | MTERF domain containing 2                                         | ENST00000475860 | 0,767021474 |
| A_23_P410587   | NM_024900       | PHF17          | PHD finger protein 17                                             | ENST00000511647 | 0,76690453  |

|               |                  |                |                                                               |                 |             |
|---------------|------------------|----------------|---------------------------------------------------------------|-----------------|-------------|
| A_23_P78018   | NM_018672        | ABCA5          | ATP-binding cassette, sub-family A (ABC1), member 5           | ENST00000392676 | 0,766875441 |
| A_21_P0011464 | TCONS_I2_0001009 | XLOC_I2_005438 |                                                               |                 | 0,766839181 |
| A_33_P3228295 | ENST00000381732  | RCL1           | RNA terminal phosphate cyclase-like 1                         | ENST00000381732 | 0,766754317 |
| A_33_P3231065 | ENST00000407893  | MEMO1          | mediator of cell motility 1                                   | ENST00000407893 | 0,766715512 |
| A_23_P114084  | NM_000444        | PHEX           | phosphate regulating endopeptidase homolog, X-linked          | ENST00000537599 | 0,766018137 |
| A_23_P50217   | NM_024833        | ZNF671         | zinc finger protein 671                                       | ENST00000317398 | 0,765789482 |
| A_21_P0007206 | TCONS_00019294   | XLOC_009122    |                                                               |                 | 0,765662566 |
| A_23_P130764  | NM_170720        | KCNJ14         | potassium inwardly-rectifying channel, subfamily J, member 14 | ENST00000391884 | 0,765661209 |
| A_21_P0008899 | TCONS_00024308   | XLOC_011618    |                                                               |                 | 0,765563955 |
| A_33_P3357143 | ENST00000404297  | MTIF2          | mitochondrial translational initiation factor 2               | ENST00000404297 | 0,765551387 |
| A_23_P416191  | NM_176885        | TAS2R31        | taste receptor, type 2, member 31                             | ENST00000390675 | 0,765041825 |
| A_33_P3494109 | AK057377         | LOC146795      | uncharacterized LOC146795                                     |                 | 0,764756915 |
| A_21_P0010878 | BC065722         | BMS1P5         | BMS1 pseudogene 5                                             |                 | 0,764610884 |
| A_33_P3227904 | NM_207348        | SLC25A34       | solute carrier family 25, member 34                           | ENST00000294454 | 0,764103997 |
| A_23_P146134  | NM_024025        | DUSP26         | dual specificity phosphatase 26 (putative)                    | ENST00000256261 | 0,76397702  |
| A_21_P0000488 | NR_004379        | SNORD96B       | small nucleolar RNA, C/D box 96B                              |                 | 0,763791894 |
| A_33_P3322430 | ENST00000399306  | CTNS           | cystinosis, lysosomal cystine transporter                     | ENST00000399306 | 0,763627275 |
| A_33_P3388061 | NM_181617        | KRTAP21-2      | keratin associated protein 21-2                               | ENST00000333892 | 0,763579291 |
| A_33_P3567967 | AK023417         | FLJ11292       | uncharacterized protein FLJ11292                              |                 | 0,761972163 |
| A_21_P0000242 | NR_002437        | SNORD54        | small nucleolar RNA, C/D box 54                               | ENST00000521289 | 0,761952424 |
| A_23_P371885  | NM_016632        | ARL17A         | ADP-ribosylation factor-like 17A                              | ENST00000337845 | 0,761854662 |
| A_33_P3384442 | ENST00000370677  | LAMA5          | laminin, alpha 5                                              | ENST00000370677 | 0,761692711 |
| A_21_P0000222 | NR_000024        | SNORD46        | small nucleolar RNA, C/D box 46                               |                 | 0,761396805 |
| A_23_P108404  | NM_001037131     | AGAP1          | ArfGAP with GTPase domain, ankyrin repeat and PH domain       | ENST00000304032 | 0,76101019  |
| A_33_P3321205 | NM_001159531     | BEGAIN         | brain-enriched guanylate kinase-associated homolog (rat)      | ENST00000443071 | 0,760951935 |
| A_21_P0012313 | AB051440         | LOC440792      | proline dehydrogenase (oxidase) 1 pseudogene                  |                 | 0,760828593 |
| A_23_P56298   | NM_025189        | ZNF430         | zinc finger protein 430                                       | ENST00000261560 | 0,760819201 |
| A_33_P3276693 | NM_002632        | PGF            | placental growth factor                                       | ENST00000555567 | 0,760778784 |
| A_33_P3410831 | NR_024440        | LOC729609      | uncharacterized LOC729609                                     |                 | 0,760561371 |



|               |                 |              |                                                                         |                 |             |
|---------------|-----------------|--------------|-------------------------------------------------------------------------|-----------------|-------------|
| A_33_P3382769 | NR_024474       | UBE2Q2P3     | ubiquitin-conjugating enzyme E2Q family member 2 pseudogene 3           |                 | 0,760287806 |
| A_33_P3253501 | NM_001161334    | HIST2H2BF    | histone cluster 2, H2bf                                                 | ENST00000369167 | 0,759706277 |
| A_23_P165676  | ENST00000491265 | MZT2A        | mitotic spindle organizing protein 2A                                   | ENST00000491265 | 0,759419205 |
| A_33_P3219697 | NM_198493       | ANKRD45      | ankyrin repeat domain 45                                                |                 | 0,759145205 |
| A_23_P74981   | NM_033213       | ZNF670       | zinc finger protein 670                                                 | ENST00000366503 | 0,759093069 |
| A_21_P0000068 | NM_001167676    | LOC100128071 | uncharacterized LOC100128071                                            |                 | 0,758862415 |
| A_21_P0001196 | ENST00000421851 | XLOC_001095  |                                                                         | ENST00000421851 | 0,758829021 |
| A_23_P303851  | NM_176886       | TAS2R45      | taste receptor, type 2, member 45                                       |                 | 0,758589343 |
| A_21_P0005578 | TCONS_00014218  | XLOC_006259  |                                                                         |                 | 0,758517049 |
| A_21_P0014224 | XR_108920       | LOC100505760 | uncharacterized LOC100505760                                            |                 | 0,758516296 |
| A_23_P369733  | NM_020850       | RANBP10      | RAN binding protein 10                                                  | ENST00000317506 | 0,75839418  |
| A_33_P3338152 | ENST00000457865 | HIF3A        | hypoxia inducible factor 3, alpha subunit                               | ENST00000457865 | 0,758029936 |
| A_33_P3333033 | AK124883        | SGSM2        | small G protein signaling modulator 2                                   |                 | 0,757109738 |
| A_33_P3659678 | ENST00000487099 | NR6A1        | nuclear receptor subfamily 6, group A, member 1                         | ENST00000487099 | 0,756787872 |
| A_21_P0008919 | TCONS_00024360  | XLOC_011682  |                                                                         |                 | 0,756534261 |
| A_21_P0011029 | NR_029401       | LOC731275    | uncharacterized LOC731275                                               | ENST00000435840 | 0,75636983  |
| A_33_P3376239 | NM_182931       | MLL5         | myeloid/lymphoid or mixed-lineage leukemia 5 (trithorax h               | ENST00000257745 | 0,75598666  |
| A_33_P3210228 | ENST00000375947 | ZCCHC6       | zinc finger, CCHC domain containing 6                                   | ENST00000375947 | 0,755932745 |
| A_33_P3329428 | NM_133379       | TTN          | titin                                                                   | ENST00000306136 | 0,755451122 |
| A_23_P90079   | NM_001080821    | ZNF799       | zinc finger protein 799                                                 | ENST00000430385 | 0,755411566 |
| A_33_P3365878 | NM_001720       | BMP8B        | bone morphogenetic protein 8b                                           | ENST00000372827 | 0,755261887 |
| A_21_P0000496 | NR_004395       | SNORD1A      | small nucleolar RNA, C/D box 1A                                         |                 | 0,75522828  |
| A_33_P3321602 | ENST00000373838 | PHACTR4      | phosphatase and actin regulator 4                                       | ENST00000373838 | 0,755218085 |
| A_33_P3352767 | NM_002386       | MC1R         | melanocortin 1 receptor (alpha melanocyte stimulating hormone receptor) |                 | 0,754856101 |
| A_21_P0009600 | TCONS_00026596  | XLOC_012622  |                                                                         |                 | 0,754805647 |
| A_21_P0005793 | BC024246        | XLOC_006985  |                                                                         |                 | 0,75467846  |
| A_23_P305616  | NR_015441       | LOC652276    | potassium channel tetramerisation domain containing 5 pse               | ENST00000399702 | 0,754658267 |
| A_33_P3366754 | AK126945        | LOC100128670 | uncharacterized LOC100128670                                            |                 | 0,754507604 |
| A_21_P0001617 | TCONS_00001800  | XLOC_001189  |                                                                         |                 | 0,754400728 |

|               |                 |                |                                                             |                 |             |
|---------------|-----------------|----------------|-------------------------------------------------------------|-----------------|-------------|
| A_23_P110462  | NM_013340       | PCDHB1         | protocadherin beta 1                                        | ENST00000306549 | 0,754320401 |
| A_33_P3233843 | NM_001190981    | IL6ST          | interleukin 6 signal transducer (gp130, oncostatin M recept | ENST00000542298 | 0,753960925 |
| A_33_P3812815 | NM_000296       | PKD1           | polycystic kidney disease 1 (autosomal dominant)            | ENST00000537889 | 0,753920407 |
| A_33_P3237403 | NM_173531       | ZNF100         | zinc finger protein 100                                     | ENST00000358296 | 0,753624104 |
| A_23_P127394  | NM_021117       | CRY2           | cryptochrome 2 (photolyase-like)                            | ENST00000443527 | 0,753268546 |
| A_23_P8754    | NM_005763       | AASS           | aminoadipate-semialdehyde synthase                          | ENST00000358954 | 0,753000677 |
| A_21_P0012208 | AK127572        | XLOC_I2_009273 |                                                             |                 | 0,752853362 |
| A_24_P105564  | NM_005399       | PRKAB2         | protein kinase, AMP-activated, beta 2 non-catalytic subunit | ENST00000254101 | 0,752370615 |
| A_33_P3381361 | ENST00000312632 | SPG7           | spastic paraplegia 7 (pure and complicated autosomal reces  | ENST00000312632 | 0,752059481 |
| A_33_P3641427 | NM_016132       | MYEF2          | myelin expression factor 2                                  | ENST00000324324 | 0,751737594 |
| A_33_P3324333 | BC022023        | ANKRD20A5P     | ankyrin repeat domain 20 family, member A5, pseudogene      |                 | 0,75170386  |
| A_32_P176550  | NM_152405       | JMY            | junction mediating and regulatory protein, p53 cofactor     | ENST00000282259 | 0,751569279 |
| A_32_P4403    | NM_014117       | C16orf72       | chromosome 16 open reading frame 72                         | ENST00000327827 | 0,751263239 |
| A_24_P922252  | AK022348        | SPATA5L1       | spermatogenesis associated 5-like 1                         |                 | 0,751001045 |
| A_23_P208325  | NM_004234       | ZNF235         | zinc finger protein 235                                     | ENST00000291182 | 0,749793537 |
| A_21_P0014673 | XR_111219       | LOC100506982   | uncharacterized LOC100506982                                |                 | 0,749640068 |
| A_23_P126727  | NM_024654       | NOL9           | nucleolar protein 9                                         | ENST00000377705 | 0,749450847 |
| A_21_P0004978 | TCONS_00012029  | XLOC_005561    |                                                             |                 | 0,749429533 |
| A_33_P3271273 | NM_002145       | HOXB2          | homeobox B2                                                 | ENST00000326226 | 0,749266545 |
| A_21_P0004500 | TCONS_00010663  | XLOC_004339    |                                                             |                 | 0,748843879 |
| A_24_P194688  | NM_181723       | EFHA2          | EF-hand domain family, member A2                            | ENST00000318063 | 0,748385281 |
| A_21_P0006672 | THC2579940      | XLOC_008461    |                                                             |                 | 0,748080785 |
| A_33_P3380837 | NM_133463       | AMZ1           | archaelysin family metallopeptidase 1                       | ENST00000312371 | 0,748007921 |
| A_33_P3326483 | NM_004378       | CRABP1         | cellular retinoic acid binding protein 1                    | ENST00000299529 | 0,747872233 |
| A_21_P0010879 | NR_026566       | BMS1P1         | BMS1 pseudogene 1                                           | ENST00000426063 | 0,747536838 |
| A_33_P3300867 | AK124637        | LOC100506514   | uncharacterized LOC100506514                                |                 | 0,747425822 |
| A_23_P125686  | NR_002226       | INGX           | inhibitor of growth family, X-linked, pseudogene            | ENST00000489074 | 0,747249565 |
| A_23_P168556  | NM_004603       | STX1A          | syntaxin 1A (brain)                                         | ENST00000222812 | 0,746924615 |
| A_21_P0000482 | NR_003940       | SNORD80        | small nucleolar RNA, C/D box 80                             |                 | 0,746455314 |

|               |                 |                |                                                                  |                 |             |
|---------------|-----------------|----------------|------------------------------------------------------------------|-----------------|-------------|
| A_21_P0010877 | BC065722        | BMS1P5         | BMS1 pseudogene 5                                                |                 | 0,745767782 |
| A_24_P29277   | NM_001130105    | COL4A3BP       | collagen, type IV, alpha 3 (Goodpasture antigen) binding protein |                 | 0,745551538 |
| A_33_P3368800 | NM_017940       | NBPF1          | neuroblastoma breakpoint family, member 1                        | ENST00000429672 | 0,744619823 |
| A_33_P3244165 | NR_003287       | RN28S1         | RNA, 28S ribosomal 1                                             |                 | 0,744612526 |
| A_21_P0000258 | NR_002564       | SNORD26        | small nucleolar RNA, C/D box 26                                  |                 | 0,744566397 |
| A_21_P0002168 | THC2561405      | XLOC_001342    |                                                                  |                 | 0,744438853 |
| A_33_P3346936 | ENST00000549378 | MON2           | MON2 homolog (S. cerevisiae)                                     | ENST00000549378 | 0,744419775 |
| A_33_P3293353 | NM_016121       | KCTD3          | potassium channel tetramerisation domain containing 3            | ENST00000366945 | 0,744375463 |
| A_23_P395595  | NM_015308       | FNBP4          | formin binding protein 4                                         | ENST00000263773 | 0,744323719 |
| A_24_P34155   | NM_001122607    | RUNX1          | runt-related transcription factor 1                              | ENST00000479325 | 0,744139435 |
| A_33_P3354076 | NR_036433       | FAM172BP       | family with sequence similarity 172, member B pseudogene         |                 | 0,743978861 |
| A_33_P3212823 | NM_001135865    | LOC100132247   | nuclear pore complex interacting protein related gene            | ENST00000447737 | 0,74391051  |
| A_24_P99838   | NM_013361       | ZNF223         | zinc finger protein 223                                          | ENST00000434772 | 0,743537398 |
| A_33_P3271530 | NM_024989       | PGAP1          | post-GPI attachment to proteins 1                                | ENST00000485830 | 0,743030261 |
| A_23_P120170  | NM_145702       | TIGD1          | tigger transposable element derived 1                            | ENST00000408957 | 0,742450541 |
| A_32_P38637   | NM_032534       | KRBA1          | KRAB-A domain containing 1                                       | ENST00000466546 | 0,742396512 |
| A_24_P134319  | ENST00000349014 | ADNP           | activity-dependent neuroprotector homeobox                       | ENST00000349014 | 0,742062552 |
| A_21_P0004452 | TCONS_00010518  | XLOC_005036    |                                                                  |                 | 0,741934528 |
| A_33_P3250148 | NM_198956       | SP8            | Sp8 transcription factor                                         | ENST00000297210 | 0,741774524 |
| A_23_P102172  | NM_173077       | CPO            | carboxypeptidase O                                               | ENST00000272852 | 0,741625119 |
| A_24_P292470  | NM_022803       | UCP3           | uncoupling protein 3 (mitochondrial, proton carrier)             | ENST00000426995 | 0,741567866 |
| A_33_P3339650 | NM_001723       | DST            | dystonin                                                         | ENST00000370765 | 0,741377576 |
| A_24_P93754   | NM_001146694    | KDM4C          | lysine (K)-specific demethylase 4C                               | ENST00000381306 | 0,740892651 |
| A_21_P0000394 | NR_003078       | SNORD110       | small nucleolar RNA, C/D box 110                                 | ENST00000494697 | 0,740734815 |
| A_21_P0012899 | THC2529542      | XLOC_l2_011987 |                                                                  |                 | 0,740707741 |
| A_33_P3336240 | NR_024044       | DEFB109P1      | defensin, beta 109, pseudogene 1                                 |                 | 0,740564142 |
| A_23_P29384   | NM_033210       | ZNF502         | zinc finger protein 502                                          | ENST00000436624 | 0,740551846 |
| A_21_P0009266 | THC2673276      | XLOC_012288    |                                                                  |                 | 0,740412636 |
| A_21_P0013850 | NR_028407       | ARMCX4         | armadillo repeat containing, X-linked 4                          | ENST00000455331 | 0,74023935  |

|                |                 |                |                                                                     |                 |             |
|----------------|-----------------|----------------|---------------------------------------------------------------------|-----------------|-------------|
| A_33_P3655815  | BQ322426        | SNORA2B        | small nucleolar RNA, H/ACA box 2B                                   |                 | 0,739986717 |
| A_24_P300302   | NR_026867       | ZNF300P1       | zinc finger protein 300 pseudogene 1                                | ENST00000520773 | 0,739756147 |
| A_33_P3328937  | NM_001112707    | TLK2           | tousled-like kinase 2                                               | ENST00000542523 | 0,739610542 |
| A_23_P417891   | NM_145735       | ARHGEF7        | Rho guanine nucleotide exchange factor (GEF) 7                      | ENST00000375741 | 0,739565511 |
| A_23_P50418    | NM_153358       | ZNF791         | zinc finger protein 791                                             | ENST00000540038 | 0,739047808 |
| A_33_P3220390  | BC028180        | WTAP           | Wilms tumor 1 associated protein                                    |                 | 0,738956182 |
| A_19_P00810899 | NR_027058       | LINC00338      | long intergenic non-protein coding RNA 338                          | ENST00000434411 | 0,738522246 |
| A_33_P3335682  | NM_033256       | PPP1R14A       | protein phosphatase 1, regulatory (inhibitor) subunit 14A           | ENST00000347262 | 0,738294891 |
| A_32_P155460   | NR_024089       | LINC00162      | long intergenic non-protein coding RNA 162                          | ENST00000422199 | 0,738182432 |
| A_23_P120170   | NM_145702       | TIGD1          | tigger transposable element derived 1                               | ENST00000408957 | 0,738179242 |
| A_23_P405216   | NM_001145083    | ZNF619         | zinc finger protein 619                                             | ENST00000314686 | 0,738032116 |
| A_21_P0000385  | NR_003069       | SNORD88C       | small nucleolar RNA, C/D box 88C                                    |                 | 0,737435582 |
| A_23_P107693   | NM_017652       | ZNF586         | zinc finger protein 586                                             | ENST00000449441 | 0,737141591 |
| A_33_P3335624  | ENST00000338548 | PSMD10         | proteasome (prosome, macropain) 26S subunit, non-ATPase             | ENST00000338548 | 0,736855754 |
| A_24_P218006   | NM_032317       | DNAJC30        | DnaJ (Hsp40) homolog, subfamily C, member 30                        |                 | 0,736416077 |
| A_23_P120170   | NM_145702       | TIGD1          | tigger transposable element derived 1                               | ENST00000408957 | 0,736391946 |
| A_33_P3414903  | ENST00000367550 | NPL            | N-acetylneuraminatase pyruvate lyase (dihydrodipicolinate synthase) | ENST00000367550 | 0,735995275 |
| A_21_P0005153  | XR_112812       | LOC100507336   | uncharacterized LOC100507336                                        | ENST00000443445 | 0,735486151 |
| A_21_P0000445  | NR_003321       | SNORD116-6     | small nucleolar RNA, C/D box 116-6                                  | ENST00000549804 | 0,734916665 |
| A_33_P3736691  | NM_025189       | ZNF430         | zinc finger protein 430                                             | ENST00000418100 | 0,734471211 |
| A_21_P0000501  | NR_004403       | SNORD97        | small nucleolar RNA, C/D box 97                                     | ENST00000530564 | 0,734330177 |
| A_23_P501080   | NM_007139       | ZNF92          | zinc finger protein 92                                              | ENST00000450302 | 0,734281658 |
| A_23_P397468   | NM_012351       | OR10J1         | olfactory receptor, family 10, subfamily J, member 1                | ENST00000423932 | 0,734070987 |
| A_24_P281009   | NR_002817       | AQP7P1         | aquaporin 7 pseudogene 1                                            |                 | 0,73365969  |
| A_23_P107963   | NM_000148       | FUT1           | fucosyltransferase 1 (galactoside 2-alpha-L-fucosyltransferase)     | ENST00000310160 | 0,733405298 |
| A_24_P91165    | NM_199248       | CACNB1         | calcium channel, voltage-dependent, beta 1 subunit                  | ENST00000536613 | 0,732865034 |
| A_23_P74042    | NM_012302       | LPHN2          | latrophilin 2                                                       | ENST00000370725 | 0,732692749 |
| A_33_P3386532  | ENST00000464758 | MRPL38         | mitochondrial ribosomal protein L38                                 | ENST00000464758 | 0,731854839 |
| A_21_P0013340  | ENST00000478672 | XLOC_l2_013931 |                                                                     | ENST00000478672 | 0,731665224 |

|                |                  |                |                                                                        |                 |             |
|----------------|------------------|----------------|------------------------------------------------------------------------|-----------------|-------------|
| A_33_P3328716  | NM_144719        | CCDC13         | coiled-coil domain containing 13                                       | ENST00000310232 | 0,731404982 |
| A_23_P116249   | NM_014619        | GRIK4          | glutamate receptor, ionotropic, kainate 4                              | ENST00000527524 | 0,731379314 |
| A_33_P3362770  | NM_018427        | RRN3           | RRN3 RNA polymerase I transcription factor homolog (S. cerevisiae)     | ENST00000327307 | 0,731309796 |
| A_33_P3552465  | ENST00000463067  | ZNF852         | zinc finger protein 852                                                | ENST00000463067 | 0,731066646 |
| A_24_P108262   | NM_001144952     | SDK2           | sidekick homolog 2 (chicken)                                           | ENST00000316893 | 0,731001825 |
| A_23_P146325   | NR_002765        | ASAP1-IT1      | ASAP1 intronic transcript 1 (non-protein coding)                       |                 | 0,730727777 |
| A_23_P114349   | NM_130776        | XAGE3          | X antigen family, member 3                                             | ENST00000346279 | 0,730486978 |
| A_33_P3292694  | XR_110489        | LOC643355      | uncharacterized LOC643355                                              |                 | 0,730125108 |
| A_24_P365322   | NM_152601        | ZNF709         | zinc finger protein 709                                                | ENST00000397732 | 0,729911429 |
| A_33_P3309031  | ENST00000503159  | C4orf36        | chromosome 4 open reading frame 36                                     | ENST00000503159 | 0,729783432 |
| A_23_P140009   | NM_000452        | SLC10A2        | solute carrier family 10 (sodium/bile acid cotransporter family)       | ENST00000245312 | 0,729668247 |
| A_23_P111797   | AL136837         | DKFZP434F142   | uncharacterized DKFZp434F142                                           |                 | 0,729599009 |
| A_33_P3285430  | ENST00000547640  | DNM1L          | dynamamin 1-like                                                       | ENST00000547640 | 0,729483315 |
| A_23_P10206    | NM_005328        | HAS2           | hyaluronan synthase 2                                                  | ENST00000303924 | 0,729446697 |
| A_23_P108342   | NM_016536        | ZNF571         | zinc finger protein 571                                                | ENST00000358744 | 0,729427629 |
| A_33_P3288431  | NM_152589        | C12orf50       | chromosome 12 open reading frame 50                                    | ENST00000551163 | 0,729423939 |
| A_23_P111919   | NM_013357        | PURG           | purine-rich element binding protein G                                  | ENST00000475541 | 0,729360986 |
| A_33_P3269869  | AK093990         | LOC284009      | uncharacterized LOC284009                                              |                 | 0,729283939 |
| A_21_P0013324  | ENST00000412091  | XLOC_I2_013873 |                                                                        | ENST00000412091 | 0,729196286 |
| A_33_P3324454  | NM_000391        | TPP1           | tripeptidyl peptidase I                                                | ENST00000453338 | 0,728954899 |
| A_21_P0011317  | TCONS_I2_0000860 | XLOC_I2_004640 |                                                                        |                 | 0,728761318 |
| A_33_P3215906  | NM_001039703     | NBPF10         | neuroblastoma breakpoint family, member 10                             | ENST00000414710 | 0,728414561 |
| A_19_P00318272 | NR_038988        | LOC100287765   |                                                                        |                 | 0,728147484 |
| A_33_P3409854  | NM_005568        | LHX1           | LIM homeobox 1                                                         | ENST00000254457 | 0,728014377 |
| A_21_P0011540  | NR_033753        | FLJ43826       | FLJ43826 protein                                                       | ENST00000425901 | 0,727861341 |
| A_24_P943566   | ENST00000379350  | PHACTR1        | phosphatase and actin regulator 1                                      | ENST00000379350 | 0,727380855 |
| A_33_P3351735  | NM_018219        | CCDC87         | coiled-coil domain containing 87                                       | ENST00000333861 | 0,727356963 |
| A_33_P3363515  | ENST00000557439  | XRCC3          | X-ray repair complementing defective repair in Chinese hamster cells 3 | ENST00000557439 | 0,727263407 |
| A_24_P181506   | NM_014699        | ZNF646         | zinc finger protein 646                                                | ENST00000394979 | 0,727188388 |



|                |                 |              |                                                             |                 |             |
|----------------|-----------------|--------------|-------------------------------------------------------------|-----------------|-------------|
| A_33_P3218905  | NR_002806       | FAM13A-AS1   | FAM13A antisense RNA 1 (non-protein coding)                 | ENST00000500765 | 0,727065223 |
| A_24_P450596   | NM_001193552    | ZNF850       | zinc finger protein 850                                     |                 | 0,726708846 |
| A_23_P120170   | NM_145702       | TIGD1        | tigger transposable element derived 1                       | ENST00000408957 | 0,72663057  |
| A_33_P3287338  | NM_001190981    | IL6ST        | interleukin 6 signal transducer (gp130, oncostatin M recept | ENST00000542298 | 0,726560288 |
| A_21_P0002307  | TCONS_00003921  | XLOC_001726  |                                                             |                 | 0,726431982 |
| A_33_P3648417  | BE972465        | SNORA55      | small nucleolar RNA, H/ACA box 55                           |                 | 0,726421952 |
| A_21_P0008996  | THC2669746      | XLOC_011827  |                                                             |                 | 0,72605737  |
| A_33_P3319113  | NM_017990       | PDPR         | pyruvate dehydrogenase phosphatase regulatory subunit       | ENST00000398122 | 0,72586616  |
| A_24_P366607   | NM_203451       | SERTM1       | serine-rich and transmembrane domain containing 1           | ENST00000315190 | 0,725792598 |
| A_33_P3235177  | NM_144993       | TET3         | tet methylcytosine dioxygenase 3                            | ENST00000409262 | 0,725695696 |
| A_23_P216038   | NM_032205       | PHF20L1      | PHD finger protein 20-like 1                                | ENST00000315808 | 0,725657589 |
| A_33_P3216319  | NM_015144       | ZCCHC14      | zinc finger, CCHC domain containing 14                      | ENST00000268616 | 0,725420919 |
| A_21_P0006193  | TCONS_00016098  | XLOC_007489  |                                                             |                 | 0,725125955 |
| A_23_P427217   | NM_032776       | JMJD1C       | jumonji domain containing 1C                                | ENST00000542921 | 0,724959359 |
| A_33_P3365747  | NR_026999       | LINC00265    | long intergenic non-protein coding RNA 265                  |                 | 0,724863867 |
| A_23_P107693   | NM_017652       | ZNF586       | zinc finger protein 586                                     | ENST00000449441 | 0,724458718 |
| A_21_P0000447  | NR_003326       | SNORD116-11  | small nucleolar RNA, C/D box 116-11                         |                 | 0,724138811 |
| A_19_P00315716 | NR_002911       | SNORA71A     |                                                             | ENST00000439912 | 0,723728523 |
| A_33_P3258127  | AY203946        | LOC100132188 | LP7097                                                      |                 | 0,723470877 |
| A_33_P3331080  | NM_001252231    | SEC24A       | SEC24 family, member A (S. cerevisiae)                      | ENST00000322887 | 0,723099691 |
| A_33_P3354499  | AK056998        | LOC401480    | uncharacterized LOC401480                                   |                 | 0,722841126 |
| A_33_P3286684  | ENST00000484847 | IKZF1        | IKAROS family zinc finger 1 (Ikaros)                        | ENST00000484847 | 0,722790126 |
| A_33_P3355821  | NM_021148       | ZNF273       | zinc finger protein 273                                     |                 | 0,722168045 |
| A_23_P154972   | NM_080740       | ZNF280A      | zinc finger protein 280A                                    | ENST00000302097 | 0,72211839  |
| A_24_P416961   | NM_001670       | ARVCF        | armadillo repeat gene deleted in velocardiofacial syndrome  | ENST00000344269 | 0,721860142 |
| A_33_P3293869  | ENST00000369086 | TIAL1        | TIA1 cytotoxic granule-associated RNA binding protein-like  | ENST00000369086 | 0,721728836 |
| A_21_P0000364  | NR_003029       | SNORD9       | small nucleolar RNA, C/D box 9                              |                 | 0,721604787 |
| A_21_P0000276  | NR_002598       | SNORD87      | small nucleolar RNA, C/D box 87                             |                 | 0,721501654 |
| A_21_P0000512  | NR_024343       | SNAR-I       | small ILF3/NF90-associated RNA I                            |                 | 0,721192588 |

|               |                  |                |                                                             |                 |             |
|---------------|------------------|----------------|-------------------------------------------------------------|-----------------|-------------|
| A_33_P3329834 | NM_018061        | PRPF38B        | PRP38 pre-mRNA processing factor 38 (yeast) domain cont     | ENST00000370022 | 0,720232212 |
| A_33_P3587611 | BC020828         | RPL36AP33      | ribosomal protein L36a pseudogene 33                        |                 | 0,719923056 |
| A_21_P0013894 | TCONS_I2_0003092 | XLOC_I2_015938 |                                                             |                 | 0,719888627 |
| A_23_P59045   | NM_021052        | HIST1H2AE      | histone cluster 1, H2ae                                     | ENST00000303910 | 0,719884722 |
| A_24_P145316  | NM_183040        | DTNBP1         | dystrobrevin binding protein 1                              | ENST00000543749 | 0,719828268 |
| A_23_P346265  | NM_024312        | GNPTAB         | N-acetylglucosamine-1-phosphate transferase, alpha and beta | ENST00000549940 | 0,719708256 |
| A_23_P101476  | NM_030824        | ZNF442         | zinc finger protein 442                                     | ENST00000242804 | 0,719502647 |
| A_23_P126037  | NM_012421        | RLF            | rearranged L-myc fusion                                     | ENST00000535839 | 0,719452882 |
| A_23_P121545  | NM_201591        | GPM6A          | glycoprotein M6A                                            | ENST00000280187 | 0,719264913 |
| A_33_P3280157 | NR_001290        | SNORD116-19    | small nucleolar RNA, C/D box 116-19                         | ENST00000549804 | 0,719155781 |
| A_23_P208210  | NM_014650        | ZNF432         | zinc finger protein 432                                     | ENST00000221315 | 0,719088004 |
| A_33_P3355266 | NM_022164        | TINAGL1        | tubulointerstitial nephritis antigen-like 1                 | ENST00000481165 | 0,719027423 |
| A_21_P0000376 | NR_003049        | SNORD32B       | small nucleolar RNA, C/D box 32B                            |                 | 0,718892285 |
| A_33_P3238777 | NR_028324        | FLJ45445       | uncharacterized LOC399844                                   | ENST00000425496 | 0,718525499 |
| A_23_P346327  | NR_026674        | FLJ30679       | uncharacterized protein FLJ30679                            |                 | 0,718433403 |
| A_21_P0013847 | ENST00000444482  | XLOC_I2_015561 |                                                             | ENST00000444482 | 0,718384692 |
| A_23_P78372   | NM_005131        | THOC1          | THO complex 1                                               | ENST00000261600 | 0,718012025 |
| A_33_P3210288 | NM_000150        | FUT6           | fucosyltransferase 6 (alpha (1,3) fucosyltransferase)       | ENST00000318336 | 0,717947153 |
| A_33_P3409458 | ENST00000393215  | C9orf171       | chromosome 9 open reading frame 171                         | ENST00000393215 | 0,717928061 |
| A_21_P0000340 | NR_002986        | SNORA60        | small nucleolar RNA, H/ACA box 60                           |                 | 0,717661062 |
| A_21_P0005309 | ENST00000412800  | XLOC_006446    |                                                             | ENST00000412800 | 0,717644208 |
| A_23_P72840   | NM_018973        | DPM3           | dolichyl-phosphate mannosyltransferase polypeptide 3        | ENST00000368399 | 0,717447496 |
| A_33_P3321801 | NR_027439        | LOC100272216   | uncharacterized LOC100272216                                |                 | 0,717392222 |
| A_24_P106839  | NM_023034        | WHSC1L1        | Wolf-Hirschhorn syndrome candidate 1-like 1                 | ENST00000528828 | 0,717144129 |
| A_21_P0010779 | ENST00000441085  | XLOC_I2_001138 |                                                             | ENST00000441085 | 0,717088579 |
| A_23_P53390   | NM_002837        | PTPRB          | protein tyrosine phosphatase, receptor type, B              | ENST00000261266 | 0,716692784 |
| A_21_P0004121 | ENST00000511579  | XLOC_004774    |                                                             | ENST00000511579 | 0,716236867 |
| A_21_P0000264 | NR_002579        | SNORD74        | small nucleolar RNA, C/D box 74                             |                 | 0,715958977 |
| A_23_P107693  | NM_017652        | ZNF586         | zinc finger protein 586                                     | ENST00000449441 | 0,715583542 |

|                |                 |                |                                                         |                 |             |
|----------------|-----------------|----------------|---------------------------------------------------------|-----------------|-------------|
| A_21_P0012089  | NR_026758       | LOC440905      | uncharacterized LOC440905                               | ENST00000449170 | 0,714787879 |
| A_33_P3209005  | AK097159        | ZNF673         | zinc finger family member 673                           |                 | 0,714735374 |
| A_33_P3210916  | ENST00000479868 | SEC13          | SEC13 homolog (S. cerevisiae)                           | ENST00000479868 | 0,714706031 |
| A_33_P3318444  | NM_001146684    | RNF222         | ring finger protein 222                                 | ENST00000399398 | 0,714578914 |
| A_24_P352637   | NM_174944       | TSSK4          | testis-specific serine kinase 4                         | ENST00000556621 | 0,71451853  |
| A_23_P120170   | NM_145702       | TIGD1          | tigger transposable element derived 1                   | ENST00000408957 | 0,714398687 |
| A_21_P0013394  | ENST00000438538 | XLOC_I2_013513 |                                                         | ENST00000438538 | 0,713587537 |
| A_33_P3232624  | NR_033908       | LOC100288069   | general transcription factor Ili pseudogene             | ENST00000446912 | 0,713541845 |
| A_33_P3414362  | NM_032582       | USP32          | ubiquitin specific peptidase 32                         | ENST00000393003 | 0,713308863 |
| A_21_P0005101  | TCONS_00012390  | XLOC_005126    |                                                         |                 | 0,713150987 |
| A_23_P349310   | NM_014494       | TNRC6A         | trinucleotide repeat containing 6A                      | ENST00000464539 | 0,712968144 |
| A_21_P0014010  | ENST00000543887 | LOC100652820   |                                                         | ENST00000543887 | 0,712915194 |
| A_33_P3239287  | NM_001005271    | CHD3           | chromodomain helicase DNA binding protein 3             | ENST00000330494 | 0,712687837 |
| A_33_P3278951  | NM_033512       | TSPYL5         | TSPY-like 5                                             | ENST00000322128 | 0,712673986 |
| A_33_P3309231  | NM_172002       | HSCB           | HscB iron-sulfur cluster co-chaperone homolog (E. coli) | ENST00000216027 | 0,712670538 |
| A_33_P3334248  | ENST00000484152 | FBRS           | fibrosin                                                | ENST00000484152 | 0,712613479 |
| A_21_P0010749  | NR_033908       | LOC100288069   | general transcription factor Ili pseudogene             | ENST00000491962 | 0,712537423 |
| A_23_P85218    | NM_005634       | SOX3           | SRY (sex determining region Y)-box 3                    | ENST00000370536 | 0,712477798 |
| A_33_P3310232  | NM_024884       | L2HGDH         | L-2-hydroxyglutarate dehydrogenase                      | ENST00000312675 | 0,712297427 |
| A_33_P3281552  | NM_001034853    | RPGR           | retinitis pigmentosa GTPase regulator                   | ENST00000378505 | 0,711988843 |
| A_23_P339687   | NM_138330       | ZNF675         | zinc finger protein 675                                 | ENST00000359788 | 0,711719675 |
| A_33_P3268793  | NM_138422       | ADAT3          | adenosine deaminase, tRNA-specific 3                    | ENST00000329478 | 0,711503137 |
| A_21_P0004761  | ENST00000430931 | XLOC_005771    |                                                         | ENST00000430931 | 0,711165699 |
| A_21_P0014789  | XR_132581       | LOC100506578   | uncharacterized protein C12orf71-like                   |                 | 0,711118069 |
| A_19_P00320090 | NR_027058       | LINC00338      | long intergenic non-protein coding RNA 338              | ENST00000434411 | 0,710966357 |
| A_23_P55688    | NM_017879       | ZNF416         | zinc finger protein 416                                 | ENST00000196489 | 0,710924148 |
| A_33_P3230017  | NR_001587       | AURKAPS1       | aurora kinase A pseudogene 1                            | ENST00000462353 | 0,710671374 |
| A_21_P0000459  | NR_003684       | SNORD119       | small nucleolar RNA, C/D box 119                        |                 | 0,710656464 |
| A_24_P235783   | ENST00000463343 | SF1            | splicing factor 1                                       | ENST00000463343 | 0,710547829 |

|               |                 |                |                                                           |                 |             |
|---------------|-----------------|----------------|-----------------------------------------------------------|-----------------|-------------|
| A_21_P0010234 | TCONS_00028996  | XLOC_013914    |                                                           |                 | 0,710351979 |
| A_21_P0008490 | TCONS_00022880  | XLOC_011134    |                                                           |                 | 0,710019418 |
| A_23_P109907  | NM_175924       | ILDR1          | immunoglobulin-like domain containing receptor 1          | ENST00000344209 | 0,709749287 |
| A_23_P109907  | NM_175924       | ILDR1          | immunoglobulin-like domain containing receptor 1          | ENST00000344209 | 0,709717028 |
| A_23_P13455   | NM_001004749    | OR51A7         | olfactory receptor, family 51, subfamily A, member 7      | ENST00000544684 | 0,709637439 |
| A_21_P0000312 | NR_002956       | SNORA14B       | small nucleolar RNA, H/ACA box 14B                        |                 | 0,709619567 |
| A_24_P136522  | ENST00000485331 | GARNL3         | GTPase activating Rap/RanGAP domain-like 3                | ENST00000485331 | 0,709525073 |
| A_33_P3347040 | NM_001242901    | LOC100131094   | uncharacterized LOC100131094                              | ENST00000381796 | 0,709288704 |
| A_33_P3399988 | BC035659        | HCP5B          | HLA complex P5B (non-protein coding)                      |                 | 0,709247683 |
| A_24_P121846  | NM_003433       | ZNF132         | zinc finger protein 132                                   | ENST00000391695 | 0,70915431  |
| A_23_P115861  | NM_145312       | ZNF485         | zinc finger protein 485                                   | ENST00000374437 | 0,708950463 |
| A_33_P3358158 | NR_033733       | CRYBB2P1       | crystallin, beta B2 pseudogene 1                          | ENST00000382734 | 0,708934956 |
| A_21_P0014622 | XR_113294       | FAM85A         | family with sequence similarity 85, member A              |                 | 0,708928768 |
| A_33_P3272402 | NM_139174       | ADAD2          | adenosine deaminase domain containing 2                   | ENST00000268624 | 0,708817288 |
| A_23_P109907  | NM_175924       | ILDR1          | immunoglobulin-like domain containing receptor 1          | ENST00000344209 | 0,708729868 |
| A_33_P3280099 | ENST00000371367 | CACNA1B        | calcium channel, voltage-dependent, N type, alpha 1B subu | ENST00000371367 | 0,708611758 |
| A_23_P398854  | NM_173660       | DOK7           | docking protein 7                                         | ENST00000515886 | 0,708333644 |
| A_21_P0005145 | TCONS_00012631  | XLOC_005559    |                                                           |                 | 0,708289079 |
| A_33_P3702281 | AK095567        | LOC284014      | uncharacterized LOC284014                                 |                 | 0,708186895 |
| A_33_P3255499 | NR_024872       | MCART1         | mitochondrial carrier triple repeat 1                     |                 | 0,708122393 |
| A_23_P109907  | NM_175924       | ILDR1          | immunoglobulin-like domain containing receptor 1          | ENST00000344209 | 0,707768077 |
| A_33_P3288074 | BC019017        | LOC730202      | uncharacterized LOC730202                                 |                 | 0,707753057 |
| A_21_P0005556 | TCONS_00014106  | XLOC_006053    |                                                           |                 | 0,707663411 |
| A_21_P0004750 | BC035191        | XLOC_005737    |                                                           |                 | 0,707594619 |
| A_21_P0011295 | ENST00000429926 | XLOC_l2_004594 |                                                           | ENST00000429926 | 0,707589038 |
| A_33_P3388771 | XR_133170       | LOC100509175   | zinc finger protein 726-like                              |                 | 0,707088067 |
| A_21_P0009889 | THC2714922      | XLOC_013684    |                                                           |                 | 0,706986771 |
| A_33_P3276068 | ENST00000356128 | BET3L          | BET3 like ( <i>S. cerevisiae</i> )                        | ENST00000356128 | 0,706974774 |
| A_23_P90542   | NM_152606       | ZNF540         | zinc finger protein 540                                   | ENST00000316433 | 0,706904495 |

|               |                  |                |                                                                           |                 |             |
|---------------|------------------|----------------|---------------------------------------------------------------------------|-----------------|-------------|
| A_33_P3239267 | NM_203370        | C3orf54        | chromosome 3 open reading frame 54                                        | ENST00000333323 | 0,706873488 |
| A_32_P146659  | NR_027040        | LOC401431      | uncharacterized LOC401431                                                 |                 | 0,706670633 |
| A_33_P3389168 | ENST00000370393  | MTM1           | myotubularin 1                                                            | ENST00000370393 | 0,706144727 |
| A_23_P383132  | NM_015094        | HIC2           | hypermethylated in cancer 2                                               | ENST00000443632 | 0,706033724 |
| A_32_P109522  | NM_145062        | ZUFSP          | zinc finger with UFM1-specific peptidase domain                           | ENST00000368576 | 0,70593723  |
| A_32_P182394  | NM_021217        | ZNF77          | zinc finger protein 77                                                    | ENST00000314531 | 0,705907133 |
| A_33_P3253653 | NM_001033045     | GPR155         | G protein-coupled receptor 155                                            | ENST00000295500 | 0,70588643  |
| A_21_P0000153 | NM_001204265     | NR3C1          | nuclear receptor subfamily 3, group C, member 1 (glucocorticoid receptor) |                 | 0,705876513 |
| A_33_P3524912 | NR_033848        | LOC283038      | uncharacterized LOC283038                                                 | ENST00000415305 | 0,705405397 |
| A_33_P3422301 | NM_032406        | PCDHGC4        | protocadherin gamma subfamily C, 4                                        | ENST00000306593 | 0,70530648  |
| A_24_P659122  | XR_132464        | LOC401357      | uncharacterized LOC401357                                                 |                 | 0,705174973 |
| A_21_P0011318 | TCONS_I2_0000860 | XLOC_I2_004640 |                                                                           |                 | 0,705084135 |
| A_23_P109907  | NM_175924        | ILDR1          | immunoglobulin-like domain containing receptor 1                          | ENST00000344209 | 0,704925249 |
| A_33_P3270863 | NM_000379        | XDH            | xanthine dehydrogenase                                                    | ENST00000379416 | 0,704867613 |
| A_33_P3234457 | ENST00000542061  | FBRSL1         | fibrosin-like 1                                                           | ENST00000542061 | 0,704813985 |
| A_23_P118392  | NM_016084        | RASD1          | RAS, dexamethasone-induced 1                                              | ENST00000225688 | 0,704683061 |
| A_23_P107693  | NM_017652        | ZNF586         | zinc finger protein 586                                                   | ENST00000449441 | 0,704500582 |
| A_21_P0000322 | NR_002968        | SNORA34        | small nucleolar RNA, H/ACA box 34                                         |                 | 0,704499559 |
| A_33_P3678883 | AB051441         | KIAA1654       | KIAA1654 protein                                                          |                 | 0,704346821 |
| A_33_P3219870 | NM_020376        | PNPLA2         | patatin-like phospholipase domain containing 2                            | ENST00000529255 | 0,704099712 |
| A_33_P3268900 | AF370457         | BNIP3L         | BCL2/adenovirus E1B 19kDa interacting protein 3-like                      |                 | 0,704042603 |
| A_23_P166536  | NM_014577        | BRD1           | bromodomain containing 1                                                  | ENST00000457780 | 0,703811534 |
| A_23_P101476  | NM_030824        | ZNF442         | zinc finger protein 442                                                   | ENST00000242804 | 0,703714507 |
| A_33_P3276913 | ENST00000399010  | TTC3           | tetratricopeptide repeat domain 3                                         | ENST00000399010 | 0,703557282 |
| A_21_P0000378 | NR_003055        | SNORD66        | small nucleolar RNA, C/D box 66                                           |                 | 0,703436394 |
| A_33_P3814473 | BF248073         | TMSB4XP1       | thymosin beta 4, X-linked pseudogene 1                                    |                 | 0,703229822 |
| A_21_P0000248 | NR_002444        | SNORA66        | small nucleolar RNA, H/ACA box 66                                         |                 | 0,703050462 |
| A_21_P0003069 | TCONS_00006331   | XLOC_002951    |                                                                           |                 | 0,702769655 |
| A_23_P101476  | NM_030824        | ZNF442         | zinc finger protein 442                                                   | ENST00000242804 | 0,702509169 |



|               |                 |              |                                                                              |                 |             |
|---------------|-----------------|--------------|------------------------------------------------------------------------------|-----------------|-------------|
| A_33_P3307068 | ENST00000462089 | GOLGA2       | golgin A2                                                                    | ENST00000462089 | 0,702216909 |
| A_23_P85188   | NM_022838       | ARMCX5       | armadillo repeat containing, X-linked 5                                      | ENST00000372742 | 0,702052276 |
| A_33_P3423250 | NM_001134888    | RTL1         | retrotransposon-like 1                                                       | ENST00000534062 | 0,70193923  |
| A_33_P3436646 | AK091114        | LOC151657    | uncharacterized LOC151657                                                    |                 | 0,701867241 |
| A_23_P41541   | NM_138364       | PRMT10       | protein arginine methyltransferase 10 (putative)                             | ENST00000511687 | 0,701837304 |
| A_33_P3332690 | BC047718        | SUZ12P       | suppressor of zeste 12 homolog pseudogene                                    |                 | 0,701767616 |
| A_21_P0000348 | NR_002996       | SNORA80      | small nucleolar RNA, H/ACA box 80                                            |                 | 0,701181594 |
| A_21_P0000650 | NM_021047       | ZNF253       | zinc finger protein 253                                                      | ENST00000502675 | 0,701022148 |
| A_23_P109907  | NM_175924       | ILDR1        | immunoglobulin-like domain containing receptor 1                             | ENST00000344209 | 0,700667339 |
| A_23_P103276  | NM_138417       | KTI12        | KTI12 homolog, chromatin associated ( <i>S. cerevisiae</i> )                 | ENST00000371614 | 0,700439469 |
| A_21_P0000472 | NR_003701       | SNORD58C     | small nucleolar RNA, C/D box 58C                                             |                 | 0,700222117 |
| A_23_P325661  | NM_003435       | ZNF134       | zinc finger protein 134                                                      | ENST00000396161 | 0,69984626  |
| A_33_P3357337 | BC026272        | CCNC         | cyclin C                                                                     | ENST00000482541 | 0,699769532 |
| A_21_P0000275 | NR_002592       | SNORD96A     | small nucleolar RNA, C/D box 96A                                             | ENST00000502890 | 0,699518334 |
| A_21_P0014791 | XR_132586       | LOC100652804 | uncharacterized LOC100652804                                                 |                 | 0,699072923 |
| A_33_P3297834 | XR_132763       | LOC100652742 | uncharacterized LOC100652742                                                 |                 | 0,698813755 |
| A_33_P3403179 | BC048193        | GUSBP1       | glucuronidase, beta pseudogene 1                                             |                 | 0,698793465 |
| A_23_P109907  | NM_175924       | ILDR1        | immunoglobulin-like domain containing receptor 1                             | ENST00000344209 | 0,698771804 |
| A_23_P300090  | NM_032128       | SLC10A7      | solute carrier family 10 (sodium/bile acid cotransporter family 10 member 7) | ENST00000394059 | 0,698653436 |
| A_32_P64475   | NM_152608       | C1orf55      | chromosome 1 open reading frame 55                                           | ENST00000366817 | 0,698599788 |
| A_23_P109907  | NM_175924       | ILDR1        | immunoglobulin-like domain containing receptor 1                             | ENST00000344209 | 0,698539009 |
| A_21_P0006569 | TCONS_00017454  | XLOC_008047  |                                                                              |                 | 0,698436432 |
| A_33_P3219010 | ENST00000505713 | PPA2         | pyrophosphatase (inorganic) 2                                                | ENST00000505713 | 0,698397075 |
| A_21_P0002937 | TCONS_00005965  | XLOC_002597  |                                                                              |                 | 0,69837708  |
| A_33_P3220202 | NM_013355       | PKN3         | protein kinase N3                                                            | ENST00000291906 | 0,698349526 |
| A_33_P3540725 | AK098783        | FLJ25917     | uncharacterized LOC401585                                                    |                 | 0,698268273 |
| A_21_P0000563 | NR_028374       | SNORA80B     | small nucleolar RNA, H/ACA box 80B                                           |                 | 0,698125305 |
| A_21_P0000359 | NR_003018       | SNORA71D     | small nucleolar RNA, H/ACA box 71D                                           |                 | 0,697994951 |
| A_21_P0014563 | XR_110312       | LOC100505675 | uncharacterized LOC100505675                                                 |                 | 0,697758565 |

|                |                 |                |                                                         |                 |             |
|----------------|-----------------|----------------|---------------------------------------------------------|-----------------|-------------|
| A_23_P216376   | NM_019098       | CNGB3          | cyclic nucleotide gated channel beta 3                  | ENST00000320005 | 0,697420964 |
| A_21_P0006320  | ENST00000414976 | XLOC_007857    |                                                         | ENST00000414976 | 0,697371657 |
| A_21_P0014650  | XR_110899       | LOC100506282   | uncharacterized LOC100506282                            |                 | 0,697155607 |
| A_21_P0010340  | ENST00000442403 | XLOC_014139    |                                                         | ENST00000442403 | 0,69701995  |
| A_21_P0000225  | NR_000028       | SNORD83B       | small nucleolar RNA, C/D box 83B                        | ENST00000467105 | 0,696882448 |
| A_33_P3276364  | ENST00000367913 | HSD17B7        | hydroxysteroid (17-beta) dehydrogenase 7                | ENST00000367913 | 0,696789354 |
| A_33_P3305058  | ENST00000451399 | CUL9           | cullin 9                                                | ENST00000451399 | 0,696699841 |
| A_23_P142407   | NM_033204       | ZNF101         | zinc finger protein 101                                 | ENST00000444249 | 0,696236227 |
| A_33_P3326545  | NM_182492       | LRP5L          | low density lipoprotein receptor-related protein 5-like | ENST00000402785 | 0,695824567 |
| A_32_P214665   | NM_001102566    | PCP4L1         | Purkinje cell protein 4 like 1                          | ENST00000504449 | 0,695676306 |
| A_33_P3409245  | XR_110199       | LOC401286      | uncharacterized LOC401286                               |                 | 0,695669658 |
| A_32_P790361   | NM_007138       | ZNF90          | zinc finger protein 90                                  | ENST00000473524 | 0,695649902 |
| A_21_P0000278  | NR_002604       | SNORD10        | small nucleolar RNA, C/D box 10                         |                 | 0,695485191 |
| A_21_P0007998  | ENST00000423739 | XLOC_010633    |                                                         | ENST00000423739 | 0,695458806 |
| A_23_P155765   | NM_002129       | HMGB2          | high mobility group box 2                               | ENST00000511316 | 0,695441427 |
| A_21_P0000272  | NR_002589       | SNORD51        | small nucleolar RNA, C/D box 51                         |                 | 0,695185959 |
| A_21_P0005368  | TCONS_00013404  | XLOC_006035    |                                                         |                 | 0,694983902 |
| A_33_P3383524  | NR_024172       | LOC91948       | uncharacterized LOC91948                                |                 | 0,694951161 |
| A_33_P3274560  | ENST00000409456 | SLC19A3        | solute carrier family 19, member 3                      | ENST00000409456 | 0,694921229 |
| A_21_P0010944  | ENST00000416851 | XLOC_I2_001953 |                                                         | ENST00000416851 | 0,694902988 |
| A_21_P0011390  | Y10483          | PRKXP1         | protein kinase, X-linked, pseudogene 1                  |                 | 0,694509308 |
| A_23_P83149    | NM_016014       | FAM108B1       | family with sequence similarity 108, member B1          | ENST00000377041 | 0,694395919 |
| A_19_P00800206 | NR_036586       | LOC400958      | uncharacterized LOC400958                               | ENST00000449259 | 0,694391483 |
| A_19_P00317016 | THC2573057      | XLOC_006037    |                                                         |                 | 0,694328158 |
| A_21_P0000499  | NR_004398       | SNORD82        | small nucleolar RNA, C/D box 82                         |                 | 0,69427483  |
| A_33_P3288219  | AK127589        | FLJ45684       | FLJ45684 locus                                          |                 | 0,694027231 |
| A_24_P922919   | NM_001040649    | ACP1           | acid phosphatase 1, soluble                             | ENST00000407983 | 0,694021823 |
| A_19_P00323103 | ENST00000485597 | XLOC_001775    |                                                         | ENST00000485597 | 0,69401734  |
| A_33_P3416142  | EF413001        | LOC100131234   | familial acute myelogenous leukemia related factor      |                 | 0,69390058  |

|               |                 |              |                                                           |                 |             |
|---------------|-----------------|--------------|-----------------------------------------------------------|-----------------|-------------|
| A_23_P164468  | NM_014913       | ADNP2        | ADNP homeobox 2                                           | ENST00000262198 | 0,693664137 |
| A_24_P178396  | NM_001031618    | SPDYE2       | speedy homolog E2 ( <i>Xenopus laevis</i> )               | ENST00000432940 | 0,693524262 |
| A_24_P36285   | NM_013398       | ZNF224       | zinc finger protein 224                                   | ENST00000336976 | 0,693403315 |
| A_32_P84242   | NM_015566       | FAM169A      | family with sequence similarity 169, member A             | ENST00000510609 | 0,693347075 |
| A_33_P3361412 | NM_018420       | SLC22A15     | solute carrier family 22, member 15                       | ENST00000369502 | 0,693273996 |
| A_23_P105495  | NM_023922       | TAS2R14      | taste receptor, type 2, member 14                         | ENST00000381852 | 0,692413988 |
| A_33_P3267431 | AK123383        | LOC642648    | uncharacterized LOC642648                                 |                 | 0,692301624 |
| A_23_P88703   | NM_005657       | TP53BP1      | tumor protein p53 binding protein 1                       | ENST00000382044 | 0,692131195 |
| A_24_P203765  | ENST00000371491 | SLC1A7       | solute carrier family 1 (glutamate transporter), member 7 | ENST00000371491 | 0,691857527 |
| A_33_P3318861 | NM_001093730    | DYTN         | dystrotelin                                               | ENST00000452335 | 0,691834468 |
| A_33_P3827416 | AK024156        | LOC399753    | uncharacterized LOC399753                                 |                 | 0,691746507 |
| A_21_P0014729 | XR_113027       | LOC100505717 | uncharacterized LOC100505717                              |                 | 0,691400722 |
| A_32_P213637  | NR_037596       | FLJ14186     | uncharacterized LOC401149                                 |                 | 0,690989951 |
| A_33_P3210880 | ENST00000355691 | ATP7A        | ATPase, Cu <sup>++</sup> transporting, alpha polypeptide  | ENST00000355691 | 0,690988907 |
| A_33_P3418611 | NM_001242680    | ZNF729       | zinc finger protein 729                                   | ENST00000357491 | 0,690689162 |
| A_33_P3283992 | NM_024833       | ZNF671       | zinc finger protein 671                                   | ENST00000335820 | 0,690523877 |
| A_23_P147495  | NM_021946       | BCORL1       | BCL6 corepressor-like 1                                   | ENST00000303743 | 0,690454162 |
| A_21_P0002586 | THC2568759      | XLOC_001417  |                                                           |                 | 0,690297247 |
| A_32_P8813    | NR_024433       | LOC283663    | uncharacterized LOC283663                                 |                 | 0,690239386 |
| A_23_P102571  | NM_020062       | SLC2A4RG     | SLC2A4 regulator                                          | ENST00000266077 | 0,689966252 |
| A_33_P3347928 | NM_020307       | CCNL1        | cyclin L1                                                 | ENST00000295925 | 0,689799223 |
| A_33_P3287078 | NM_022482       | GZF1         | GDNF-inducible zinc finger protein 1                      | ENST00000544236 | 0,689706719 |
| A_33_P3277407 | NM_182931       | MLL5         | myeloid/lymphoid or mixed-lineage leukemia 5 (trithorax h | ENST00000393656 | 0,689613096 |
| A_32_P170547  | NM_001007551    | CT45A5       | cancer/testis antigen family 45, member A5                | ENST00000491480 | 0,689559955 |
| A_21_P0000311 | NR_002955       | SNORA14A     | small nucleolar RNA, H/ACA box 14A                        |                 | 0,689315673 |
| A_23_P164927  | NM_012451       | SYNGR4       | synaptogyrin 4                                            | ENST00000344846 | 0,689202983 |
| A_21_P0005322 | ENST00000485282 | XLOC_006555  |                                                           | ENST00000485282 | 0,689070606 |
| A_23_P107693  | NM_017652       | ZNF586       | zinc finger protein 586                                   | ENST00000449441 | 0,688840462 |
| A_23_P423427  | NM_177454       | FAM171B      | family with sequence similarity 171, member B             | ENST00000304698 | 0,688453488 |

|                |                 |                |                                                          |                 |             |
|----------------|-----------------|----------------|----------------------------------------------------------|-----------------|-------------|
| A_33_P3316505  | NR_002907       | SNORA73A       | small nucleolar RNA, H/ACA box 73A                       | ENST00000437681 | 0,688315279 |
| A_19_P00322687 | NM_001242690    | ERVMER34-1     |                                                          |                 | 0,687401927 |
| A_24_P229669   | NR_024074       | GOLGA8IP       | golgin A8 family, member I, pseudogene                   | ENST00000339078 | 0,687330764 |
| A_24_P615822   | NM_014753       | BMS1           | BMS1 homolog, ribosome assembly protein (yeast)          | ENST00000426063 | 0,687006514 |
| A_32_P113114   | NM_152289       | ZNF561         | zinc finger protein 561                                  | ENST00000354661 | 0,686961943 |
| A_32_P144908   | NM_203282       | ZNF254         | zinc finger protein 254                                  | ENST00000357002 | 0,68690007  |
| A_23_P28953    | NM_175850       | DNMT3B         | DNA (cytosine-5-)-methyltransferase 3 beta               | ENST00000344505 | 0,686836111 |
| A_23_P399146   | NM_153263       | ZNF549         | zinc finger protein 549                                  | ENST00000240719 | 0,686786606 |
| A_23_P119634   | NM_007000       | UPK1A          | uroplakin 1A                                             | ENST00000379013 | 0,686716508 |
| A_24_P245108   | NM_003470       | USP7           | ubiquitin specific peptidase 7 (herpes virus-associated) | ENST00000344836 | 0,686692373 |
| A_21_P0001374  | ENST00000464336 | NBPF15         | neuroblastoma breakpoint family, member 15               | ENST00000464336 | 0,686404601 |
| A_23_P107693   | NM_017652       | ZNF586         | zinc finger protein 586                                  | ENST00000449441 | 0,686372175 |
| A_33_P3311770  | NM_213603       | ZNF789         | zinc finger protein 789                                  | ENST00000331410 | 0,686245273 |
| A_23_P126486   | NR_026752       | CROCCP2        | ciliary rootlet coiled-coil, rootletin pseudogene 2      |                 | 0,686231095 |
| A_33_P3277953  | NR_027333       | LOC100128811   | uncharacterized LOC100128811                             |                 | 0,686164358 |
| A_19_P00319038 | NM_001145418    | TTC28          |                                                          | ENST00000490475 | 0,686048431 |
| A_24_P691775   | NR_037596       | FLJ14186       | uncharacterized LOC401149                                |                 | 0,685580411 |
| A_21_P0007126  | AK091996        | XLOC_009181    |                                                          |                 | 0,68557674  |
| A_21_P0001504  | TCONS_00001494  | XLOC_000833    |                                                          |                 | 0,685446268 |
| A_24_P665504   | NR_039983       | LOC729737      | uncharacterized LOC729737                                | ENST00000419160 | 0,68535594  |
| A_32_P75425    | NR_037596       | FLJ14186       | uncharacterized LOC401149                                |                 | 0,68520427  |
| A_23_P170978   | NM_017865       | ZNF692         | zinc finger protein 692                                  | ENST00000451251 | 0,685087643 |
| A_21_P0001123  | ENST00000424948 | XLOC_000808    |                                                          | ENST00000424948 | 0,684531942 |
| A_32_P234184   | NM_001010926    | HES5           | hairy and enhancer of split 5 (Drosophila)               | ENST00000378453 | 0,684400811 |
| A_23_P149050   | NR_024321       | LINC00115      | long intergenic non-protein coding RNA 115               |                 | 0,684288922 |
| A_33_P3278774  | ENST00000483826 | ZNF44          | zinc finger protein 44                                   | ENST00000483826 | 0,683731918 |
| A_21_P0010794  | ENST00000411733 | XLOC_l2_001399 |                                                          | ENST00000411733 | 0,683604861 |
| A_23_P109907   | NM_175924       | ILDR1          | immunoglobulin-like domain containing receptor 1         | ENST00000344209 | 0,68353564  |
| A_33_P3372526  | ENST00000392214 | MDH1B          | malate dehydrogenase 1B, NAD (soluble)                   | ENST00000392214 | 0,683498966 |

|                |                  |                |                                                                  |                 |             |
|----------------|------------------|----------------|------------------------------------------------------------------|-----------------|-------------|
| A_33_P3291379  | NM_001105569     | MSGN1          | mesogenin 1                                                      | ENST00000281047 | 0,683195263 |
| A_23_P67702    | NM_003429        | ZNF85          | zinc finger protein 85                                           | ENST00000345030 | 0,682901814 |
| A_33_P3381328  | NR_027294        | FAM201A        | family with sequence similarity 201, member A                    | ENST00000484285 | 0,682826895 |
| A_23_P165239   | NM_007153        | ZNF208         | zinc finger protein 208                                          | ENST00000428290 | 0,682790609 |
| A_23_P108932   | NR_002229        | RPL23AP32      | ribosomal protein L23a pseudogene 32                             |                 | 0,682769343 |
| A_33_P3417459  | NR_023358        | SCARNA9L       | small Cajal body-specific RNA 9-like (retrotransposed)           |                 | 0,682684013 |
| A_23_P129005   | NM_025081        | NYNRIN         | NYN domain and retroviral integrase containing                   | ENST00000382554 | 0,682401693 |
| A_23_P398530   | NM_133334        | WHSC1          | Wolf-Hirschhorn syndrome candidate 1                             | ENST00000503128 | 0,682291945 |
| A_33_P3337831  | ENST00000366579  | HEATR1         | HEAT repeat containing 1                                         | ENST00000366579 | 0,682059724 |
| A_23_P18276    | NM_005778        | RBM5           | RNA binding motif protein 5                                      | ENST00000536082 | 0,681490958 |
| A_23_P152583   | NM_001042573     | ENGASE         | endo-beta-N-acetylglucosaminidase                                | ENST00000300682 | 0,681457128 |
| A_23_P107693   | NM_017652        | ZNF586         | zinc finger protein 586                                          | ENST00000449441 | 0,681380305 |
| A_19_P00316159 | ENST00000415520  | XLOC_l2_007876 |                                                                  | ENST00000415520 | 0,681349088 |
| A_33_P3210223  | ENST00000375948  | ZCCHC6         | zinc finger, CCHC domain containing 6                            | ENST00000375948 | 0,681218044 |
| A_23_P208240   | ENST00000355147  | ZNF160         | zinc finger protein 160                                          | ENST00000355147 | 0,681148057 |
| A_23_P42565    | NM_024012        | HTR5A          | 5-hydroxytryptamine (serotonin) receptor 5A                      | ENST00000287907 | 0,681071903 |
| A_33_P3304865  | BC031633         | LTN1           | listerin E3 ubiquitin protein ligase 1                           | ENST00000389195 | 0,680885727 |
| A_33_P3257252  | NM_138347        | ZNF551         | zinc finger protein 551                                          | ENST00000359821 | 0,680424148 |
| A_23_P54447    | NR_026813        | C15orf5        | chromosome 15 open reading frame 5                               |                 | 0,680403943 |
| A_33_P3236441  | NM_144972        | LDHAL6A        | lactate dehydrogenase A-like 6A                                  | ENST00000396213 | 0,680313371 |
| A_23_P432034   | NM_173510        | CCDC117        | coiled-coil domain containing 117                                | ENST00000249064 | 0,680312027 |
| A_33_P3278560  | NM_001010879     | ZIK1           | zinc finger protein interacting with K protein 1 homolog (mouse) | ENST00000356724 | 0,680193869 |
| A_23_P304652   | NM_178130        | NME9           | NME gene family member 9                                         | ENST00000383180 | 0,679909012 |
| A_33_P3365985  | XR_132811        | LOC401357      | uncharacterized LOC401357                                        |                 | 0,679860899 |
| A_23_P135164   | NM_207309        | UAP1L1         | UDP-N-acetylglucosamine pyrophosphorylase 1-like 1               | ENST00000474787 | 0,679695729 |
| A_33_P3398074  | AF132201         | LOC100133319   | PRO1804                                                          |                 | 0,679425606 |
| A_21_P0000530  | NR_045024        | C17orf76-AS1   | C17orf76 antisense RNA 1 (non-protein coding)                    |                 | 0,679369741 |
| A_23_P128372   | NM_002014        | FKBP4          | FK506 binding protein 4, 59kDa                                   | ENST00000001008 | 0,679081796 |
| A_21_P0011320  | TCONS_l2_0000860 | XLOC_l2_004640 |                                                                  |                 | 0,678551104 |



|               |                  |                |                                                               |                 |             |
|---------------|------------------|----------------|---------------------------------------------------------------|-----------------|-------------|
| A_32_P189204  | NM_174942        | GAS2L3         | growth arrest-specific 2 like 3                               | ENST00000266754 | 0,678448501 |
| A_23_P37654   | NM_001164273     | MGA            | MAX gene associated                                           | ENST00000389936 | 0,678287096 |
| A_23_P160466  | NM_006996        | SLC19A2        | solute carrier family 19 (thiamine transporter), member 2     | ENST00000236137 | 0,67824471  |
| A_21_P0010876 | ENST00000532854  | XLOC_I2_001971 |                                                               | ENST00000532854 | 0,677697276 |
| A_21_P0000325 | NR_002970        | SNORA37        | small nucleolar RNA, H/ACA box 37                             |                 | 0,67767278  |
| A_33_P3221114 | NM_144720        | JAKMIP1        | janus kinase and microtubule interacting protein 1            | ENST00000409831 | 0,677664332 |
| A_21_P0000212 | NR_000012        | SNORA68        | small nucleolar RNA, H/ACA box 68                             |                 | 0,677623537 |
| A_24_P303874  | XR_109856        | C9orf62        | chromosome 9 open reading frame 62                            | ENST00000320778 | 0,677607787 |
| A_24_P729905  | NM_001077685     | AGAP7          | ArfGAP with GTPase domain, ankyrin repeat and PH domain       | ENST00000490752 | 0,677545269 |
| A_23_P141484  | NM_018182        | C17orf63       | chromosome 17 open reading frame 63                           | ENST00000341217 | 0,677248132 |
| A_21_P0001135 | ENST00000451090  | XLOC_000849    |                                                               | ENST00000451090 | 0,677204173 |
| A_21_P0012297 | TCONS_I2_0001803 | XLOC_I2_009539 |                                                               |                 | 0,677138773 |
| A_23_P52986   | NM_152718        | VWCE           | von Willebrand factor C and EGF domains                       | ENST00000335613 | 0,676690797 |
| A_23_P109907  | NM_175924        | ILDR1          | immunoglobulin-like domain containing receptor 1              | ENST00000344209 | 0,676685622 |
| A_23_P118392  | NM_016084        | RASD1          | RAS, dexamethasone-induced 1                                  | ENST00000225688 | 0,676583999 |
| A_33_P3210516 | ENST00000419825  | C2orf43        | chromosome 2 open reading frame 43                            | ENST00000419825 | 0,675536556 |
| A_32_P7823    | NM_144578        | MAPK1IP1L      | mitogen-activated protein kinase 1 interacting protein 1-like | ENST00000395468 | 0,675508991 |
| A_23_P2283    | NM_013251        | TAC3           | tachykinin 3                                                  | ENST00000393867 | 0,675454552 |
| A_23_P404667  | NM_001197        | BIK            | BCL2-interacting killer (apoptosis-inducing)                  | ENST00000216115 | 0,675211501 |
| A_33_P3287113 | ENST00000296312  | KIAA1530       | KIAA1530                                                      | ENST00000296312 | 0,675191248 |
| A_33_P3787904 | ENST00000523599  | IKBKB          | inhibitor of kappa light polypeptide gene enhancer in B-cell: | ENST00000523599 | 0,674999177 |
| A_33_P3248405 | ENST00000536164  | NRK            | Nik related kinase                                            | ENST00000536164 | 0,67484945  |
| A_21_P0000289 | NR_002749        | SNORD45A       | small nucleolar RNA, C/D box 45A                              | ENST00000497648 | 0,674615865 |
| A_24_P14731   | NM_013271        | PCSK1N         | proprotein convertase subtilisin/kexin type 1 inhibitor       | ENST00000218230 | 0,674464677 |
| A_33_P3265606 | NM_002061        | GCLM           | glutamate-cysteine ligase, modifier subunit                   | ENST00000370238 | 0,674410599 |
| A_33_P3249524 | NM_001031618     | SPDYE2         | speedy homolog E2 (Xenopus laevis)                            | ENST00000432940 | 0,674048676 |
| A_23_P107693  | NM_017652        | ZNF586         | zinc finger protein 586                                       | ENST00000449441 | 0,674040955 |
| A_23_P114134  | NM_175711        | SSX3           | synovial sarcoma, X breakpoint 3                              | ENST00000376893 | 0,673996028 |
| A_24_P636332  | NM_198489        | CCDC84         | coiled-coil domain containing 84                              | ENST00000334418 | 0,673958706 |

|               |                  |                |                                                              |                 |             |
|---------------|------------------|----------------|--------------------------------------------------------------|-----------------|-------------|
| A_33_P3225696 | NM_133444        | ZNF526         | zinc finger protein 526                                      | ENST00000301215 | 0,673931415 |
| A_23_P433016  | NM_001996        | FBLN1          | fibulin 1                                                    | ENST00000476366 | 0,673793369 |
| A_23_P8013    | NM_003519        | HIST1H2BL      | histone cluster 1, H2bl                                      | ENST00000377401 | 0,67378218  |
| A_23_P82108   | NM_020861        | ZBTB2          | zinc finger and BTB domain containing 2                      | ENST00000325144 | 0,673735345 |
| A_23_P114084  | NM_000444        | PHEX           | phosphate regulating endopeptidase homolog, X-linked         | ENST00000537599 | 0,673502026 |
| A_21_P0009382 | AB593144         | XLOC_012142    |                                                              |                 | 0,673303022 |
| A_32_P46191   | NM_001159522     | ZNF727         | zinc finger protein 727                                      | ENST00000550760 | 0,673096915 |
| A_21_P0003604 | TCONS_00008057   | XLOC_003522    |                                                              |                 | 0,672631335 |
| A_33_P3376095 | NM_001040709     | SYPL2          | synaptophysin-like 2                                         | ENST00000369872 | 0,67261448  |
| A_21_P0011185 | TCONS_I2_0000720 | XLOC_I2_003992 |                                                              |                 | 0,672191409 |
| A_23_P27636   | NM_144566        | ZNF700         | zinc finger protein 700                                      | ENST00000254321 | 0,672138789 |
| A_21_P0001923 | ENST00000450667  | XLOC_001699    |                                                              | ENST00000450667 | 0,672103846 |
| A_33_P3353496 | NM_153368        | GJD4           | gap junction protein, delta 4, 40.1kDa                       | ENST00000321660 | 0,671845706 |
| A_33_P3339103 | NM_203290        | POLR1C         | polymerase (RNA) I polypeptide C, 30kDa                      | ENST00000372373 | 0,671812991 |
| A_23_P104594  | NM_021920        | SCT            | secretin                                                     | ENST00000176195 | 0,671807718 |
| A_21_P0014088 | XR_108395        | LOC100506439   | uncharacterized LOC100506439                                 | ENST00000430048 | 0,671612778 |
| A_21_P0011625 | NR_027418        | LOC100499466   | uncharacterized LOC100499466                                 |                 | 0,671612016 |
| A_24_P118011  | NR_027258        | PRORS1P        | prolyl-tRNA synthetase associated domain containing 1, pse   | ENST00000295112 | 0,671496279 |
| A_21_P0013530 | BC038783         | C8orf68        | chromosome 8 open reading frame 68                           |                 | 0,671463842 |
| A_33_P3209522 | NM_144975        | SLFN5          | schlafen family member 5                                     | ENST00000299977 | 0,671384253 |
| A_23_P103503  | NM_002393        | MDM4           | Mdm4 p53 binding protein homolog (mouse)                     | ENST00000391947 | 0,671370603 |
| A_21_P0001585 | TCONS_00001693   | XLOC_001052    |                                                              |                 | 0,671279306 |
| A_23_P103276  | NM_138417        | KTI12          | KTI12 homolog, chromatin associated ( <i>S. cerevisiae</i> ) | ENST00000371614 | 0,671224546 |
| A_33_P3336287 | NM_001142627     | SEC61A2        | Sec61 alpha 2 subunit ( <i>S. cerevisiae</i> )               | ENST00000379017 | 0,67116629  |
| A_23_P129659  | NM_138447        | ZNF689         | zinc finger protein 689                                      | ENST00000443190 | 0,671160814 |
| A_24_P360529  | ENST00000396642  | PDE7A          | phosphodiesterase 7A                                         | ENST00000396642 | 0,670993511 |
| A_33_P3213419 | AK054946         | LOC100129447   | uncharacterized LOC100129447                                 |                 | 0,670809008 |
| A_32_P109036  | NM_001076678     | ZNF493         | zinc finger protein 493                                      | ENST00000355504 | 0,670762707 |
| A_33_P3318237 | NM_006244        | PPP2R5B        | protein phosphatase 2, regulatory subunit B', beta           | ENST00000359279 | 0,670748528 |

|                |                  |                |                                                       |                 |             |
|----------------|------------------|----------------|-------------------------------------------------------|-----------------|-------------|
| A_33_P3363655  | NM_022662        | ANAPC1         | anaphase promoting complex subunit 1                  | ENST00000451367 | 0,670699781 |
| A_23_P214080   | NM_001964        | EGR1           | early growth response 1                               | ENST00000239938 | 0,670639886 |
| A_23_P325625   | NM_173690        | SCAI           | suppressor of cancer cell invasion                    | ENST00000467917 | 0,670578704 |
| A_23_P107693   | NM_017652        | ZNF586         | zinc finger protein 586                               | ENST00000449441 | 0,6703273   |
| A_24_P368943   | NM_001989        | EVX1           | even-skipped homeobox 1                               | ENST00000496902 | 0,670324213 |
| A_23_P114349   | NM_130776        | XAGE3          | X antigen family, member 3                            | ENST00000346279 | 0,670229639 |
| A_21_P0013568  | AK311573         | XLOC_I2_014802 |                                                       |                 | 0,670105591 |
| A_21_P0008487  | TCONS_00022868   | XLOC_011119    |                                                       |                 | 0,669783228 |
| A_33_P3224795  | NM_022466        | IKZF5          | IKAROS family zinc finger 5 (Pegasus)                 | ENST00000368886 | 0,669581053 |
| A_33_P3299766  | ENST00000369246  | FAM160B1       | family with sequence similarity 160, member B1        | ENST00000369246 | 0,669409753 |
| A_21_P0006249  | TCONS_00016263   | XLOC_007635    |                                                       |                 | 0,669280561 |
| A_33_P3389779  | ENST00000408998  | WDR33          | WD repeat domain 33                                   | ENST00000408998 | 0,669126148 |
| A_21_P0000581  | NR_029388        | LOC728407      | poly (ADP-ribose) glycohydrolase pseudogene           | ENST00000415340 | 0,669109991 |
| A_23_P53530    | NM_001033050     | MTERFD3        | MTERF domain containing 3                             | ENST00000552029 | 0,669098943 |
| A_19_P00318152 | NR_003239        | SNHG11         |                                                       |                 | 0,668741003 |
| A_23_P101476   | NM_030824        | ZNF442         | zinc finger protein 442                               | ENST00000242804 | 0,668693513 |
| A_21_P0001457  | ENST00000449154  | XLOC_000676    |                                                       | ENST00000449154 | 0,66851767  |
| A_33_P3279109  | BC039601         | ZNF75A         | zinc finger protein 75a                               |                 | 0,668055439 |
| A_23_P130444   | NM_018260        | ZNF701         | zinc finger protein 701                               | ENST00000301093 | 0,66795686  |
| A_21_P0013346  | ENST00000451962  | XLOC_I2_013963 |                                                       | ENST00000451962 | 0,667778533 |
| A_32_P35969    | NM_001190455     | CHRNA7         | cholinergic receptor, nicotinic, alpha 7              | ENST00000454250 | 0,667730507 |
| A_32_P191503   | NR_026999        | LINC00265      | long intergenic non-protein coding RNA 265            |                 | 0,667649763 |
| A_21_P0000387  | NR_003071        | SNORD90        | small nucleolar RNA, C/D box 90                       |                 | 0,667445336 |
| A_23_P332908   | NM_144982        | ZFC3H1         | zinc finger, C3H1-type containing                     | ENST00000548100 | 0,667207557 |
| A_23_P160226   | NM_001039464     | HEATR8         | HEAT repeat containing 8                              | ENST00000421030 | 0,666998095 |
| A_23_P119763   | NM_022436        | ABCG5          | ATP-binding cassette, sub-family G (WHITE), member 5  | ENST00000409962 | 0,666921998 |
| A_19_P00810009 | ENST00000551631  | LOC100506948   |                                                       | ENST00000551631 | 0,666918183 |
| A_33_P3252612  | NM_017781        | CYP2W1         | cytochrome P450, family 2, subfamily W, polypeptide 1 | ENST00000308919 | 0,6665922   |
| A_21_P0010591  | TCONS_I2_0000096 | XLOC_I2_000727 |                                                       |                 | 0,666560157 |

|                |                 |              |                                                                 |                 |             |
|----------------|-----------------|--------------|-----------------------------------------------------------------|-----------------|-------------|
| A_24_P411863   | NM_182931       | MLL5         | myeloid/lymphoid or mixed-lineage leukemia 5 (trithorax h       | ENST00000393656 | 0,666525973 |
| A_33_P3415653  | AK128046        | LOC100128668 | uncharacterized LOC100128668                                    |                 | 0,666471053 |
| A_33_P3252809  | ENST00000405673 | FAM118A      | family with sequence similarity 118, member A                   | ENST00000405673 | 0,66633376  |
| A_33_P3268629  | NR_026999       | LINC00265    | long intergenic non-protein coding RNA 265                      |                 | 0,666315151 |
| A_23_P301247   | NM_003517       | HIST2H2AC    | histone cluster 2, H2ac                                         | ENST00000331380 | 0,666237558 |
| A_33_P3292851  | ENST00000402301 | UBE2I        | ubiquitin-conjugating enzyme E2I                                | ENST00000402301 | 0,665905364 |
| A_24_P922631   | NM_001102609    | C5orf58      | chromosome 5 open reading frame 58                              | ENST00000521850 | 0,665869012 |
| A_23_P211785   | NM_003420       | ZNF35        | zinc finger protein 35                                          | ENST00000396056 | 0,665646561 |
| A_21_P0000624  | NM_001243392    | SLC6A13      | solute carrier family 6 (neurotransmitter transporter, GABA     | ENST00000436453 | 0,665541986 |
| A_23_P168864   | NM_001029976    | ZNF16        | zinc finger protein 16                                          | ENST00000394909 | 0,665512341 |
| A_19_P00320242 | ENST00000551938 | LOC100506948 |                                                                 | ENST00000551938 | 0,66528491  |
| A_24_P19268    | NM_182515       | ZNF714       | zinc finger protein 714                                         | ENST00000343332 | 0,665174393 |
| A_33_P3420530  | NM_001134366    | GAD2         | glutamate decarboxylase 2 (pancreatic islets and brain, 65k     | ENST00000376261 | 0,665105638 |
| A_19_P00322983 | THC2573057      | XLOC_006037  |                                                                 |                 | 0,664810768 |
| A_24_P220771   | NM_032217       | ANKRD17      | ankyrin repeat domain 17                                        | ENST00000411811 | 0,664807661 |
| A_23_P103503   | NM_002393       | MDM4         | Mdm4 p53 binding protein homolog (mouse)                        | ENST00000391947 | 0,664700872 |
| A_21_P0000349  | NR_002998       | SCARNA3      | small Cajal body-specific RNA 3                                 |                 | 0,664505847 |
| A_24_P136551   | ENST00000374747 | NPLOC4       | nuclear protein localization 4 homolog ( <i>S. cerevisiae</i> ) | ENST00000374747 | 0,663886565 |
| A_24_P233078   | NR_003064       | PYY2         | peptide YY, 2 (seminalplasmin)                                  | ENST00000441253 | 0,66347774  |
| A_33_P3308626  | NM_014940       | MON1B        | MON1 homolog B (yeast)                                          | ENST00000320859 | 0,663387251 |
| A_32_P182473   | NM_145233       | ZNF625       | zinc finger protein 625                                         | ENST00000439556 | 0,663336459 |
| A_33_P3235420  | NM_201431       | RASSF6       | Ras association (RalGDS/AF-6) domain family member 6            | ENST00000342081 | 0,663318615 |
| A_33_P3248900  | NR_028324       | FLJ45445     | uncharacterized LOC399844                                       | ENST00000425496 | 0,663288287 |
| A_23_P103276   | NM_138417       | KTI12        | KTI12 homolog, chromatin associated ( <i>S. cerevisiae</i> )    | ENST00000371614 | 0,663143837 |
| A_33_P3307775  | NM_003677       | DENR         | density-regulated protein                                       |                 | 0,662885198 |
| A_23_P115861   | NM_145312       | ZNF485       | zinc finger protein 485                                         | ENST00000374437 | 0,662749091 |
| A_23_P103276   | NM_138417       | KTI12        | KTI12 homolog, chromatin associated ( <i>S. cerevisiae</i> )    | ENST00000371614 | 0,662672422 |
| A_21_P0000284  | NR_002742       | SNORD52      | small nucleolar RNA, C/D box 52                                 | ENST00000395788 | 0,662511134 |
| A_19_P00317242 | XM_001716361    | LOC388210    | apolipoporphins-like                                            |                 | 0,662498616 |

|                |                 |                |                                                                 |                 |             |
|----------------|-----------------|----------------|-----------------------------------------------------------------|-----------------|-------------|
| A_23_P107963   | NM_000148       | FUT1           | fucosyltransferase 1 (galactoside 2-alpha-L-fucosyltransferase) | ENST00000310160 | 0,662387419 |
| A_32_P88719    | NM_001031834    | RAB40AL        | RAB40A, member RAS oncogene family-like                         | ENST00000218249 | 0,66233224  |
| A_33_P3390576  | NM_001197104    | MLL            | myeloid/lymphoid or mixed-lineage leukemia (trithorax homolog)  | ENST00000389506 | 0,662327019 |
| A_21_P0002850  | XR_110050       | LOC100506301   | uncharacterized LOC100506301                                    | ENST00000416124 | 0,662216781 |
| A_21_P0010267  | HQ013231        | XLOC_013994    |                                                                 |                 | 0,662176243 |
| A_21_P0014156  | XR_108632       | LOC100507603   | uncharacterized LOC100507603                                    |                 | 0,662134584 |
| A_33_P3390570  | NM_005933       | MLL            | myeloid/lymphoid or mixed-lineage leukemia (trithorax homolog)  | ENST00000389507 | 0,662126782 |
| A_33_P3365845  | ENST00000466694 | NUPL1          | nucleoporin like 1                                              | ENST00000466694 | 0,661613389 |
| A_21_P0013856  | THC2516011      | XLOC_l2_015641 |                                                                 |                 | 0,661605736 |
| A_33_P3221432  | NM_001037813    | ZNF284         | zinc finger protein 284                                         | ENST00000421176 | 0,661460445 |
| A_33_P3386671  | NM_005060       | RORC           | RAR-related orphan receptor C                                   | ENST00000356728 | 0,661200666 |
| A_23_P101476   | NM_030824       | ZNF442         | zinc finger protein 442                                         | ENST00000242804 | 0,661124445 |
| A_33_P3287661  | AK126997        | LOC100130430   | uncharacterized LOC100130430                                    |                 | 0,661074314 |
| A_23_P79247    | NM_024989       | PGAP1          | post-GPI attachment to proteins 1                               | ENST00000482051 | 0,6610418   |
| A_23_P403424   | NM_005090       | JMJD7-PLA2G4B  | JMJD7-PLA2G4B readthrough                                       | ENST00000483748 | 0,661026174 |
| A_21_P0007572  | TCONS_00020456  | XLOC_009788    |                                                                 |                 | 0,66096596  |
| A_21_P0000274  | NR_002591       | SNORD95        | small nucleolar RNA, C/D box 95                                 | ENST00000503170 | 0,660964803 |
| A_33_P3749627  | AB007978        | KIAA0509       | uncharacterized LOC57242                                        |                 | 0,660905869 |
| A_21_P0007801  | THC2749949      | XLOC_010258    |                                                                 |                 | 0,660718983 |
| A_33_P3289251  | AK095971        | LOC644727      | uncharacterized LOC644727                                       |                 | 0,660654505 |
| A_33_P3405897  | NM_014798       | PLEKHM1        | pleckstrin homology domain containing, family M (with RUF)      | ENST00000397718 | 0,660471518 |
| A_33_P3211864  | NR_028407       | ARMCX4         | armadillo repeat containing, X-linked 4                         | ENST00000354842 | 0,660450637 |
| A_33_P3398091  | NM_001130031    | ZNF562         | zinc finger protein 562                                         | ENST00000541032 | 0,660386149 |
| A_21_P0010044  | TCONS_00028410  | XLOC_013763    |                                                                 |                 | 0,66036128  |
| A_21_P0002438  | TCONS_00004245  | XLOC_002085    |                                                                 |                 | 0,66034004  |
| A_33_P3227320  | NM_152622       | MIER3          | mesoderm induction early response 1, family member 3            | ENST00000452157 | 0,660170936 |
| A_19_P00316105 | ENST00000422861 | L3MBTL1        | l(3)mbt-like 1 (Drosophila)                                     | ENST00000422861 | 0,660165584 |
| A_23_P258002   | NM_017632       | CDKN2AIP       | CDKN2A interacting protein                                      | ENST00000504169 | 0,660127399 |
| A_23_P130158   | NM_030753       | WNT3           | wingless-type MMTV integration site family, member 3            | ENST00000225512 | 0,660003099 |



|                |                  |                |                                                            |                 |  |             |
|----------------|------------------|----------------|------------------------------------------------------------|-----------------|--|-------------|
| A_21_P0009089  | TCONS_00024777   | XLOC_012052    |                                                            |                 |  | 0,659973714 |
| A_33_P3220152  | NM_014963        | SBNO2          | strawberry notch homolog 2 (Drosophila)                    | ENST00000250872 |  | 0,659658601 |
| A_21_P0010394  | ENST00000445987  | MED15          | mediator complex subunit 15                                | ENST00000445987 |  | 0,659466097 |
| A_23_P114084   | NM_000444        | PHEX           | phosphate regulating endopeptidase homolog, X-linked       | ENST00000537599 |  | 0,659430093 |
| A_23_P321501   | NM_182908        | DHRS2          | dehydrogenase/reductase (SDR family) member 2              | ENST00000556701 |  | 0,659405854 |
| A_23_P46315    | ENST00000369540  | DENND2C        | DENN/MADD domain containing 2C                             | ENST00000369540 |  | 0,659205713 |
| A_33_P3407742  | NM_001033556     | PPM1B          | protein phosphatase, Mg2+/Mn2+ dependent, 1B               | ENST00000409895 |  | 0,659122076 |
| A_33_P3283147  | NM_001005245     | OR5M11         | olfactory receptor, family 5, subfamily M, member 11       | ENST00000528616 |  | 0,65888764  |
| A_33_P3223632  | XR_133099        | LOC100653259   | e3 ubiquitin-protein ligase HERC2-like                     |                 |  | 0,658700563 |
| A_21_P0011608  | TCONS_I2_0001143 | XLOC_I2_006173 |                                                            |                 |  | 0,658610209 |
| A_33_P3276585  | NM_001099224     | IFT74          | intraflagellar transport 74 homolog (Chlamydomonas)        | ENST00000429045 |  | 0,658036211 |
| A_21_P0004866  | NR_026775        | LINC00240      | long intergenic non-protein coding RNA 240                 | ENST00000503488 |  | 0,658018585 |
| A_24_P151834   | NM_020740        | ANKFY1         | ankyrin repeat and FYVE domain containing 1                | ENST00000433651 |  | 0,657938913 |
| A_33_P3219459  | NM_001114748     | C1orf70        | chromosome 1 open reading frame 70                         | ENST00000378733 |  | 0,657904653 |
| A_33_P3298111  | ENST00000466831  | SPATA13        | spermatogenesis associated 13                              | ENST00000466831 |  | 0,657902704 |
| A_33_P3266265  | NM_001025780     | FAM108B1       | family with sequence similarity 108, member B1             | ENST00000333421 |  | 0,657900887 |
| A_33_P3379436  | NR_026802        | FAM74A4        | family with sequence similarity 74, member A4              | ENST00000427006 |  | 0,657866161 |
| A_23_P115861   | NM_145312        | ZNF485         | zinc finger protein 485                                    | ENST00000374437 |  | 0,657800119 |
| A_33_P3392123  | NR_026544        | LOC100233209   | uncharacterized LOC100233209                               |                 |  | 0,657579805 |
| A_33_P3759592  | AK023835         | FLJ13773       | FLJ13773                                                   |                 |  | 0,657567983 |
| A_19_P00810474 | XM_003403479     | LOC100652741   |                                                            |                 |  | 0,657438611 |
| A_23_P103503   | NM_002393        | MDM4           | Mdm4 p53 binding protein homolog (mouse)                   | ENST00000391947 |  | 0,657256992 |
| A_33_P3320197  | NM_001002919     | FAM150B        | family with sequence similarity 150, member B              | ENST00000436353 |  | 0,657213798 |
| A_32_P386636   | NM_182761        | FAM170A        | family with sequence similarity 170, member A              | ENST00000296787 |  | 0,657128104 |
| A_33_P3377459  | NM_001040284     | PAPD5          | PAP associated domain containing 5                         | ENST00000436909 |  | 0,657059399 |
| A_23_P103503   | NM_002393        | MDM4           | Mdm4 p53 binding protein homolog (mouse)                   | ENST00000391947 |  | 0,656983791 |
| A_21_P0006023  | ENST00000422010  | XLOC_007422    |                                                            | ENST00000422010 |  | 0,656864511 |
| A_23_P396867   | NM_178582        | HM13           | histocompatibility (minor) 13                              | ENST00000498035 |  | 0,656764676 |
| A_23_P119573   | NM_002248        | KCNN1          | potassium intermediate/small conductance calcium-activated | ENST00000222249 |  | 0,656632134 |

|               |                 |                |                                                          |                 |             |
|---------------|-----------------|----------------|----------------------------------------------------------|-----------------|-------------|
| A_33_P3269453 | ENST00000342579 | BPTF           | bromodomain PHD finger transcription factor              | ENST00000342579 | 0,656410778 |
| A_33_P3252630 | NM_203282       | ZNF254         | zinc finger protein 254                                  | ENST00000392281 | 0,65639242  |
| A_23_P55376   | NM_015443       | KIAA1267       | KIAA1267                                                 | ENST00000262419 | 0,656387498 |
| A_23_P337270  | ENST00000383770 | NEK10          | NIMA (never in mitosis gene a)- related kinase 10        | ENST00000383770 | 0,656099844 |
| A_33_P3320393 | NM_016065       | MRPS16         | mitochondrial ribosomal protein S16                      | ENST00000372940 | 0,656071445 |
| A_33_P3323392 | XM_001716667    | LOC731932      | uncharacterized LOC731932                                |                 | 0,655804558 |
| A_23_P394323  | ENST00000491535 | FAM98B         | family with sequence similarity 98, member B             | ENST00000491535 | 0,655639739 |
| A_21_P0011770 | BC041478        | XLOC_I2_006718 |                                                          |                 | 0,655623402 |
| A_23_P129413  | NM_022357       | DPEP3          | dipeptidase 3                                            | ENST00000268793 | 0,655326457 |
| A_23_P103503  | NM_002393       | MDM4           | Mdm4 p53 binding protein homolog (mouse)                 | ENST00000391947 | 0,655132925 |
| A_23_P31376   | NM_018334       | LRRN3          | leucine rich repeat neuronal 3                           | ENST00000308478 | 0,655069611 |
| A_21_P0000252 | NR_002450       | SNORD68        | small nucleolar RNA, C/D box 68                          | ENST00000487034 | 0,655040312 |
| A_33_P3419938 | NM_000551       | VHL            | von Hippel-Lindau tumor suppressor                       | ENST00000345392 | 0,655011149 |
| A_21_P0000210 | NR_000010       | SNORD4A        | small nucleolar RNA, C/D box 4A                          | ENST00000473896 | 0,654932389 |
| A_21_P0000213 | NR_000013       | SNORD42B       | small nucleolar RNA, C/D box 42B                         |                 | 0,654454934 |
| A_23_P103276  | NM_138417       | KT112          | KT112 homolog, chromatin associated (S. cerevisiae)      | ENST00000371614 | 0,654410185 |
| A_33_P3370461 | BC047718        | SUZ12P         | suppressor of zeste 12 homolog pseudogene                |                 | 0,654387511 |
| A_21_P0000256 | NR_002562       | SNORD28        | small nucleolar RNA, C/D box 28                          |                 | 0,654208727 |
| A_23_P118392  | NM_016084       | RASD1          | RAS, dexamethasone-induced 1                             | ENST00000225688 | 0,654103252 |
| A_21_P0000268 | NR_002584       | SNORA69        | small nucleolar RNA, H/ACA box 69                        | ENST00000477403 | 0,653874633 |
| A_21_P0013963 | XM_003118619    | LOC100507445   | uncharacterized protein LOC100507445                     |                 | 0,653869611 |
| A_21_P0006695 | ENST00000439157 | XLOC_008556    |                                                          | ENST00000439157 | 0,653865819 |
| A_21_P0002398 | TCONS_00004131  | XLOC_001974    |                                                          |                 | 0,653807454 |
| A_23_P120170  | NM_145702       | TIGD1          | tigger transposable element derived 1                    | ENST00000408957 | 0,653654777 |
| A_21_P0000257 | NR_002563       | SNORD27        | small nucleolar RNA, C/D box 27                          |                 | 0,652974523 |
| A_23_P335039  | NM_133474       | ZNF721         | zinc finger protein 721                                  | ENST00000338977 | 0,652499193 |
| A_21_P0012794 | ENST00000510592 | XLOC_I2_011265 |                                                          | ENST00000510592 | 0,652496182 |
| A_33_P3219745 | ENST00000368681 | ILF2           | interleukin enhancer binding factor 2, 45kDa             | ENST00000368681 | 0,652252749 |
| A_33_P3315475 | NM_001080435    | WHAMM          | WAS protein homolog associated with actin, golgi membrar | ENST00000234505 | 0,652143657 |

|               |                 |                |                                                           |  |                 |             |
|---------------|-----------------|----------------|-----------------------------------------------------------|--|-----------------|-------------|
| A_21_P0005640 | TCONS_00014570  | XLOC_006680    |                                                           |  |                 | 0,652135328 |
| A_23_P166400  | NM_001007279    | RASL10A        | RAS-like, family 10, member A                             |  | ENST00000401450 | 0,65196118  |
| A_23_P371011  | NM_182490       | ZNF227         | zinc finger protein 227                                   |  | ENST00000377916 | 0,651732975 |
| A_33_P3291459 | NR_037169       | LOC100507547   | uncharacterized LOC100507547                              |  | ENST00000487140 | 0,651704354 |
| A_33_P3340639 | ENST00000369425 | GPAM           | glycerol-3-phosphate acyltransferase, mitochondrial       |  | ENST00000369425 | 0,651668384 |
| A_33_P3242909 | NM_145276       | ZNF563         | zinc finger protein 563                                   |  | ENST00000318168 | 0,651425078 |
| A_21_P0000382 | NR_003059       | SNORD71        | small nucleolar RNA, C/D box 71                           |  |                 | 0,651297099 |
| A_33_P3390955 | NR_004422       | HPVC1          | human papillomavirus (type 18) E5 central sequence-like 1 |  |                 | 0,651268759 |
| A_24_P838483  | NM_001037671    | C12orf74       | chromosome 12 open reading frame 74                       |  | ENST00000397833 | 0,651102408 |
| A_21_P0003882 | TCONS_00009003  | XLOC_003849    |                                                           |  |                 | 0,650902813 |
| A_21_P0013266 | BQ926105        | XLOC_I2_013594 |                                                           |  |                 | 0,65077579  |
| A_23_P38482   | NM_024297       | PHF23          | PHD finger protein 23                                     |  | ENST00000454255 | 0,650665818 |
| A_33_P3392366 | XR_132755       | LOC100128366   | uncharacterized LOC100128366                              |  |                 | 0,650293695 |
| A_21_P0000760 | NR_038318       | LOC100526771   | uncharacterized LOC100526771                              |  | ENST00000527329 | 0,650270525 |
| A_23_P115861  | NM_145312       | ZNF485         | zinc finger protein 485                                   |  | ENST00000374437 | 0,650181196 |
| A_33_P3375528 | NM_152622       | MIER3          | mesoderm induction early response 1, family member 3      |  | ENST00000451637 | 0,650103932 |
| A_33_P3241244 | AK128841        | LOC100131822   | uncharacterized LOC100131822                              |  |                 | 0,649989326 |
| A_21_P0012235 | AK127572        | XLOC_I2_009273 |                                                           |  |                 | 0,649829243 |
| A_33_P3416420 | NM_145062       | ZUFSP          | zinc finger with UFM1-specific peptidase domain           |  | ENST00000368573 | 0,649660989 |
| A_33_P3423270 | NM_018306       | TMEM40         | transmembrane protein 40                                  |  | ENST00000435218 | 0,649581472 |
| A_23_P94911   | NM_181845       | ZNF283         | zinc finger protein 283                                   |  | ENST00000324461 | 0,64953677  |
| A_32_P11230   | NR_024497       | LOC399744      | uncharacterized LOC399744                                 |  |                 | 0,649418847 |
| A_33_P3546363 | BQ950045        | LOC400128      | uncharacterized LOC400128                                 |  |                 | 0,649197362 |
| A_33_P3227691 | NM_004594       | SLC9A5         | solute carrier family 9 (sodium/hydrogen exchanger), mem  |  | ENST00000299798 | 0,648935621 |
| A_24_P818010  | NR_028326       | LOC100133161   | uncharacterized LOC100133161                              |  |                 | 0,64866949  |
| A_32_P177097  | NM_024341       | ZNF557         | zinc finger protein 557                                   |  | ENST00000252840 | 0,648653491 |
| A_32_P38283   | NM_174910       | TCTE3          | t-complex-associated-testis-expressed 3                   |  | ENST00000366774 | 0,64865098  |
| A_23_P372988  | NM_001134316    | PRR22          | proline rich 22                                           |  | ENST00000390672 | 0,64819875  |
| A_23_P254573  | NM_014377       | DNAJC2         | DnaJ (Hsp40) homolog, subfamily C, member 2               |  | ENST00000464253 | 0,647851092 |

|                |                   |                |                                                              |                 |             |
|----------------|-------------------|----------------|--------------------------------------------------------------|-----------------|-------------|
| A_33_P3345414  | ENST00000373626   | RPS4X          | ribosomal protein S4, X-linked                               | ENST00000373626 | 0,64781495  |
| A_24_P71938    | NM_005900         | SMAD1          | SMAD family member 1                                         |                 | 0,647637211 |
| A_21_P0000333  | NR_002978         | SNORA46        | small nucleolar RNA, H/ACA box 46                            |                 | 0,647519522 |
| A_33_P3369419  | NM_032292         | GON4L          | gon-4-like (C. elegans)                                      | ENST00000368327 | 0,647403022 |
| A_33_P3349045  | NM_001008699      | IL4R           | interleukin 4 receptor                                       | ENST00000380925 | 0,647361966 |
| A_23_P78802    | NM_016457         | PRKD2          | protein kinase D2                                            | ENST00000291281 | 0,647081731 |
| A_21_P0005187  | TCONS_00012836    | XLOC_005944    |                                                              |                 | 0,647041251 |
| A_21_P0007039  | TCONS_00018649    | XLOC_009000    |                                                              |                 | 0,646982493 |
| A_23_P108342   | NM_016536         | ZNF571         | zinc finger protein 571                                      | ENST00000358744 | 0,646819921 |
| A_21_P0011342  | AK127420          | LOC400464      | uncharacterized LOC400464                                    |                 | 0,646718531 |
| A_33_P3265224  | ENST00000537589   | CEP68          | centrosomal protein 68kDa                                    | ENST00000537589 | 0,646538059 |
| A_21_P0013893  | TCONS_I2_00030929 | XLOC_I2_015938 |                                                              |                 | 0,646469204 |
| A_33_P3709317  | NR_002964         | SNORA28        | small nucleolar RNA, H/ACA box 28                            |                 | 0,646444108 |
| A_33_P3416009  | AK001274          | DONSON         | downstream neighbor of SON                                   | ENST00000303113 | 0,646266531 |
| A_23_P103503   | NM_002393         | MDM4           | Mdm4 p53 binding protein homolog (mouse)                     | ENST00000391947 | 0,646162387 |
| A_21_P0011354  | THC2500351        | XLOC_I2_004844 |                                                              |                 | 0,646075686 |
| A_24_P314597   | ENST00000485551   | KIAA0319L      | KIAA0319-like                                                | ENST00000485551 | 0,645694881 |
| A_32_P196115   | NM_145115         | ZNF498         | zinc finger protein 498                                      | ENST00000485586 | 0,645467455 |
| A_23_P95736    | NM_001001415      | ZNF429         | zinc finger protein 429                                      | ENST00000358491 | 0,645457384 |
| A_33_P3246858  | ENST00000393149   | TBX15          | T-box 15                                                     | ENST00000393149 | 0,645446063 |
| A_33_P3229370  | NM_001546         | ID4            | inhibitor of DNA binding 4, dominant negative helix-loop-hel | ENST00000378700 | 0,645347428 |
| A_19_P00319779 | ENST00000553134   | LOC100506948   |                                                              | ENST00000553134 | 0,645115662 |
| A_23_P59069    | NM_003527         | HIST1H2BO      | histone cluster 1, H2bo                                      | ENST00000303806 | 0,645057518 |
| A_24_P280497   | NM_001142641      | FBRSL1         | fibrosin-like 1                                              | ENST00000261673 | 0,644915744 |
| A_19_P00322101 | NR_038955         | LOC100506190   | uncharacterized LOC100506190                                 |                 | 0,644884709 |
| A_21_P0000085  | NM_001171906      | NUDT16         | nudix (nucleoside diphosphate linked moiety X)-type motif    | ENST00000502852 | 0,644857111 |
| A_23_P103503   | NM_002393         | MDM4           | Mdm4 p53 binding protein homolog (mouse)                     | ENST00000391947 | 0,64482882  |
| A_24_P390909   | NM_181882         | PRX            | periaxin                                                     | ENST00000341562 | 0,644724235 |
| A_23_P110430   | NM_002448         | MSX1           | msh homeobox 1                                               | ENST00000382723 | 0,644686348 |

|               |                 |             |                                                               |                 |             |
|---------------|-----------------|-------------|---------------------------------------------------------------|-----------------|-------------|
| A_24_P93736   | NR_024341       | FLJ40292    | uncharacterized LOC643210                                     |                 | 0,644684146 |
| A_24_P203953  | BC037281        | LOC439951   | uncharacterized LOC439951                                     |                 | 0,644656461 |
| A_24_P83183   | NM_005663       | WHSC2       | Wolf-Hirschhorn syndrome candidate 2                          | ENST00000411638 | 0,644593955 |
| A_23_P114084  | NM_000444       | PHEX        | phosphate regulating endopeptidase homolog, X-linked          | ENST00000537599 | 0,644223993 |
| A_23_P144531  | ENST00000309610 | ALPK1       | alpha-kinase 1                                                | ENST00000309610 | 0,644189738 |
| A_21_P0003091 | THC2503819      | XLOC_002996 |                                                               |                 | 0,64410712  |
| A_21_P0006123 | TCONS_00015915  | XLOC_007277 |                                                               |                 | 0,643660217 |
| A_33_P3262118 | ENST00000314174 | LUZP1       | leucine zipper protein 1                                      | ENST00000314174 | 0,643535658 |
| A_21_P0000302 | NR_002920       | SNORA8      | small nucleolar RNA, H/ACA box 8                              | ENST00000534079 | 0,64349614  |
| A_23_P108342  | NM_016536       | ZNF571      | zinc finger protein 571                                       | ENST00000358744 | 0,643454529 |
| A_33_P3685572 | BX649145        | LOC157562   | uncharacterized LOC157562                                     |                 | 0,643444943 |
| A_23_P118392  | NM_016084       | RASD1       | RAS, dexamethasone-induced 1                                  | ENST00000225688 | 0,643318791 |
| A_21_P0000398 | NR_003140       | SNORD117    | small nucleolar RNA, C/D box 117                              |                 | 0,643162548 |
| A_33_P3361472 | ENST00000488687 | PSME4       | proteasome (prosome, macropain) activator subunit 4           | ENST00000488687 | 0,643140572 |
| A_21_P0008722 | TCONS_00023629  | XLOC_011429 |                                                               |                 | 0,643033712 |
| A_33_P3372566 | ENST00000443426 | ABCC10      | ATP-binding cassette, sub-family C (CFTR/MRP), member 10      | ENST00000443426 | 0,643026819 |
| A_21_P0007635 | TCONS_00020579  | XLOC_009895 |                                                               |                 | 0,642564808 |
| A_21_P0000086 | NM_001172557    | GOLGA3      | golgin A3                                                     | ENST00000545875 | 0,642379777 |
| A_23_P123228  | NM_000111       | SLC26A3     | solute carrier family 26, member 3                            | ENST00000340010 | 0,642119955 |
| A_21_P0006331 | TCONS_00016498  | XLOC_007879 |                                                               |                 | 0,64199692  |
| A_23_P411922  | NM_001031698    | PRPF40B     | PRP40 pre-mRNA processing factor 40 homolog B (S. cerevisiae) | ENST00000261897 | 0,641993871 |
| A_33_P3273000 | AK128371        | PTK2B       | PTK2B protein tyrosine kinase 2 beta                          | ENST00000397497 | 0,641888372 |
| A_23_P216935  | NR_026677       | MIR600HG    | MIR600 host gene (non-protein coding)                         | ENST00000545631 | 0,641882607 |
| A_32_P8529    | NR_027058       | LINC00338   | long intergenic non-protein coding RNA 338                    | ENST00000434411 | 0,641771869 |
| A_23_P103503  | NM_002393       | MDM4        | Mdm4 p53 binding protein homolog (mouse)                      | ENST00000391947 | 0,641411335 |
| A_23_P103503  | NM_002393       | MDM4        | Mdm4 p53 binding protein homolog (mouse)                      | ENST00000391947 | 0,641411223 |
| A_24_P350744  | NM_014949       | KIAA0907    | KIAA0907                                                      | ENST00000466713 | 0,641305253 |
| A_23_P148484  | NM_016120       | RLIM        | ring finger protein, LIM domain interacting                   | ENST00000349225 | 0,641264647 |
| A_23_P219084  | NM_032924       | ZNF3        | zinc finger protein 3                                         | ENST00000487620 | 0,641246651 |



|                |                 |                |                                                              |                 |             |
|----------------|-----------------|----------------|--------------------------------------------------------------|-----------------|-------------|
| A_21_P0000383  | NR_003065       | SNORD84        | small nucleolar RNA, C/D box 84                              | ENST00000467175 | 0,641239328 |
| A_33_P3245674  | ENST00000500161 | ZNF329         | zinc finger protein 329                                      | ENST00000500161 | 0,641188477 |
| A_33_P3358712  | NR_027390       | POLR2M         | polymerase (RNA) II (DNA directed) polypeptide M             | ENST00000464277 | 0,641005995 |
| A_33_P3355717  | ENST00000408913 | ZFP36L1        | zinc finger protein 36, C3H type-like 1                      | ENST00000408913 | 0,640977867 |
| A_21_P0007662  | TCONS_00020641  | XLOC_009943    |                                                              |                 | 0,640585122 |
| A_21_P0001139  | AK128720        | PKP4           | plakophilin 4                                                | ENST00000448344 | 0,640504166 |
| A_24_P80532    | NM_004354       | CCNG2          | cyclin G2                                                    | ENST00000354403 | 0,640484276 |
| A_19_P00322984 | THC2573057      | XLOC_006037    |                                                              |                 | 0,640231674 |
| A_21_P0014714  | ENST00000498714 | FOXP1-IT1      |                                                              | ENST00000498714 | 0,639980564 |
| A_33_P3379017  | NM_015094       | HIC2           | hypermethylated in cancer 2                                  | ENST00000407598 | 0,639926943 |
| A_33_P3372924  | ENST00000366779 | ADCK3          | aarF domain containing kinase 3                              | ENST00000366779 | 0,639913048 |
| A_21_P0009377  | TCONS_00025825  | XLOC_012097    |                                                              |                 | 0,63990347  |
| A_33_P3410895  | ENST00000421059 | POR            | P450 (cytochrome) oxidoreductase                             | ENST00000421059 | 0,639757832 |
| A_23_P342668   | NM_005088       | AKAP17A        | A kinase (PRKA) anchor protein 17A                           | ENST00000474361 | 0,639737939 |
| A_23_P66719    | NM_144683       | DHRS13         | dehydrogenase/reductase (SDR family) member 13               | ENST00000426464 | 0,639385714 |
| A_23_P108932   | NR_002229       | RPL23AP32      | ribosomal protein L23a pseudogene 32                         |                 | 0,638961452 |
| A_23_P103276   | NM_138417       | KTI12          | KTI12 homolog, chromatin associated ( <i>S. cerevisiae</i> ) | ENST00000371614 | 0,638942725 |
| A_33_P3626709  | AK126613        | LOC100129280   | uncharacterized LOC100129280                                 |                 | 0,638859978 |
| A_23_P164022   | NM_033375       | MYO1C          | myosin IC                                                    | ENST00000361007 | 0,638751824 |
| A_24_P137997   | NM_030580       | ZNF34          | zinc finger protein 34                                       | ENST00000527740 | 0,638556654 |
| A_23_P86386    | NM_024804       | ZNF669         | zinc finger protein 669                                      | ENST00000535105 | 0,638446652 |
| A_33_P3413404  | AK309987        | PARVB          | parvin, beta                                                 | ENST00000402876 | 0,638089487 |
| A_21_P0014876  | XR_132783       | LOC100652948   | uncharacterized LOC100652948                                 |                 | 0,637955192 |
| A_23_P114084   | NM_000444       | PHEX           | phosphate regulating endopeptidase homolog, X-linked         | ENST00000537599 | 0,637729275 |
| A_19_P00322495 | NM_001195131    | LOC100130890   | uncharacterized LOC100130890                                 |                 | 0,63757935  |
| A_23_P54116    | NM_014992       | DAAM1          | dishevelled associated activator of morphogenesis 1          | ENST00000553307 | 0,637541305 |
| A_21_P0013343  | THC2539716      | XLOC_I2_013931 |                                                              |                 | 0,637532914 |
| A_21_P0001322  | TCONS_00000997  | XLOC_000263    |                                                              |                 | 0,637417475 |
| A_24_P208737   | NR_004431       | GHRLOS         | ghrelin opposite strand/antisense RNA (non-protein coding)   | ENST00000439539 | 0,637317797 |

|                |                  |                |                                                           |                 |             |
|----------------|------------------|----------------|-----------------------------------------------------------|-----------------|-------------|
| A_21_P0000631  | NR_034079        | LOC643733      | caspase 4, apoptosis-related cysteine peptidase pseudogen | ENST00000531091 | 0,637157756 |
| A_33_P3311717  | ENST00000551557  | TGIF1          | TGFB-induced factor homeobox 1                            | ENST00000551557 | 0,636941094 |
| A_23_P137238   | NM_004653        | KDM5D          | lysine (K)-specific demethylase 5D                        | ENST00000492117 | 0,636913542 |
| A_33_P3275000  | NM_001083621     | ZBTB40         | zinc finger and BTB domain containing 40                  | ENST00000400239 | 0,636842882 |
| A_23_P211584   | NM_033318        | C22orf32       | chromosome 22 open reading frame 32                       | ENST00000331479 | 0,636657219 |
| A_24_P51588    | NM_030937        | CCNL2          | cyclin L2                                                 | ENST00000488340 | 0,636238298 |
| A_33_P3245484  | AK124361         | LOC100131000   | uncharacterized LOC100131000                              |                 | 0,636109112 |
| A_21_P0013069  | NR_003504        | GUSBP2         | glucuronidase, beta pseudogene 2                          | ENST00000466668 | 0,636091154 |
| A_23_P101476   | NM_030824        | ZNF442         | zinc finger protein 442                                   | ENST00000242804 | 0,63604814  |
| A_19_P00316349 | THC2641849       | XLOC_012034    |                                                           |                 | 0,635744519 |
| A_21_P0013915  | XM_001715069     | LOC100130445   | uncharacterized LOC100130445                              |                 | 0,635266323 |
| A_33_P3323939  | NM_001102469     | LIPN           | lipase, family member N                                   | ENST00000404459 | 0,635102803 |
| A_21_P0013280  | TCONS_I2_0002638 | XLOC_I2_013728 |                                                           |                 | 0,635023669 |
| A_21_P0000263  | NR_002576        | SNORA21        | small nucleolar RNA, H/ACA box 21                         |                 | 0,634951399 |
| A_21_P0008206  | TCONS_00022098   | XLOC_010707    |                                                           |                 | 0,634732603 |
| A_23_P52480    | NM_000772        | CYP2C18        | cytochrome P450, family 2, subfamily C, polypeptide 18    | ENST00000476630 | 0,634521614 |
| A_33_P3229380  | NR_029401        | LOC731275      | uncharacterized LOC731275                                 | ENST00000415989 | 0,634483686 |
| A_24_P315500   | NR_024567        | LOC100130557   | uncharacterized LOC100130557                              |                 | 0,634318671 |
| A_33_P3355743  | NM_018040        | GPATCH2        | G patch domain containing 2                               | ENST00000366934 | 0,634020442 |
| A_33_P3378531  | NM_020682        | AS3MT          | arsenic (+3 oxidation state) methyltransferase            | ENST00000369880 | 0,633981451 |
| A_24_P114142   | NM_005076        | CNTN2          | contactin 2 (axonal)                                      | ENST00000331830 | 0,633955963 |
| A_21_P0011370  | NR_027409        | GOLGA8A        | golgin A8 family, member A                                | ENST00000360553 | 0,633918642 |
| A_33_P3236316  | NR_037596        | FLJ14186       | uncharacterized LOC401149                                 |                 | 0,633850497 |
| A_23_P115861   | NM_145312        | ZNF485         | zinc finger protein 485                                   | ENST00000374437 | 0,633745439 |
| A_21_P0014237  | XR_108981        | LOC100507332   | uncharacterized LOC100507332                              |                 | 0,63366433  |
| A_21_P0014358  | XR_109439        | LOC100507520   | uncharacterized LOC100507520                              |                 | 0,633501855 |
| A_19_P00325158 | NR_002819        | MALAT1         |                                                           |                 | 0,633406208 |
| A_21_P0007854  | TCONS_00021223   | XLOC_009911    |                                                           |                 | 0,633056236 |
| A_33_P3395823  | NM_172109        | KCNQ2          | potassium voltage-gated channel, KQT-like subfamily, mem  | ENST00000344425 | 0,632837015 |

|                |                  |                |                                                         |                 |             |
|----------------|------------------|----------------|---------------------------------------------------------|-----------------|-------------|
| A_33_P3722568  | NR_027232        | PPP2R3B-AS1    | PPP2R3B antisense RNA 1 (non-protein coding)            | ENST00000391707 | 0,632683804 |
| A_23_P107693   | NM_017652        | ZNF586         | zinc finger protein 586                                 | ENST00000449441 | 0,63259918  |
| A_23_P59388    | NM_001723        | DST            | dystonin                                                | ENST00000370765 | 0,632586941 |
| A_23_P108932   | NR_002229        | RPL23AP32      | ribosomal protein L23a pseudogene 32                    |                 | 0,6323266   |
| A_21_P0009596  | TCONS_00026588   | XLOC_012904    |                                                         |                 | 0,632306516 |
| A_33_P3252989  | NM_015037        | KIAA0913       | KIAA0913                                                | ENST00000398706 | 0,632280231 |
| A_23_P11664    | NM_004768        | SRSF11         | serine/arginine-rich splicing factor 11                 | ENST00000489188 | 0,632255703 |
| A_24_P932416   | NM_001123228     | TMEM14E        | transmembrane protein 14E                               | ENST00000408960 | 0,631918702 |
| A_23_P252855   | NM_018321        | BRX1           | BRX1, biogenesis of ribosomes, homolog (S. cerevisiae)  | ENST00000506023 | 0,631880705 |
| A_33_P3288569  | NM_001144891     | MBIP           | MAP3K12 binding inhibitory protein 1                    | ENST00000554855 | 0,631806951 |
| A_19_P00318593 | ENST00000504068  | Q9B8G3         |                                                         | ENST00000504068 | 0,63166968  |
| A_21_P0004998  | BC050584         | XLOC_005595    |                                                         |                 | 0,631615713 |
| A_21_P0014837  | ENST00000508031  | LOC100507388   |                                                         | ENST00000508031 | 0,631549377 |
| A_21_P0011737  | TCONS_I2_0001300 | XLOC_I2_006996 |                                                         |                 | 0,631439674 |
| A_33_P3327076  | NM_001001824     | OR2T27         | olfactory receptor, family 2, subfamily T, member 27    | ENST00000344889 | 0,631233982 |
| A_19_P00806962 | XR_109771        | LOC100506774   | uncharacterized LOC100506774                            |                 | 0,630869924 |
| A_23_P115861   | NM_145312        | ZNF485         | zinc finger protein 485                                 | ENST00000374437 | 0,630663463 |
| A_23_P117261   | NM_130806        | RXFP2          | relaxin/insulin-like family peptide receptor 2          | ENST00000298386 | 0,630640636 |
| A_23_P26511    | NM_024307        | GDPD3          | glycerophosphodiester phosphodiesterase domain containi | ENST00000360688 | 0,630535699 |
| A_23_P53267    | NM_023012        | RSRC2          | arginine/serine-rich coiled-coil 2                      | ENST00000532695 | 0,630365235 |
| A_23_P206077   | NM_022767        | AEN            | apoptosis enhancing nuclease                            | ENST00000332810 | 0,630189096 |
| A_33_P3217743  | NR_037596        | FLJ14186       | uncharacterized LOC401149                               |                 | 0,629966267 |
| A_21_P0005349  | ENST00000421380  | XLOC_005965    |                                                         | ENST00000421380 | 0,629704888 |
| A_33_P3421520  | NM_022466        | IKZF5          | IKAROS family zinc finger 5 (Pegasus)                   | ENST00000368886 | 0,629702083 |
| A_23_P27894    | NM_014649        | SAFB2          | scaffold attachment factor B2                           | ENST00000252542 | 0,629678153 |
| A_32_P97862    | NM_001145474     | ATPAF1-AS1     | ATPAF1 antisense RNA 1 (non-protein coding)             | ENST00000334122 | 0,629673932 |
| A_21_P0014388  | ENST00000545324  | DNM2           | dynamamin 2                                             | ENST00000545324 | 0,629633731 |
| A_33_P3407384  | ENST00000373413  | ZSCAN20        | zinc finger and SCAN domain containing 20               | ENST00000373413 | 0,629540569 |
| A_33_P3287646  | NM_001540        | HSPB1          | heat shock 27kDa protein 1                              | ENST00000432276 | 0,629515868 |

|                |                  |                |                                                                    |                 |             |
|----------------|------------------|----------------|--------------------------------------------------------------------|-----------------|-------------|
| A_24_P50950    | ENST00000492980  | CCDC88B        | coiled-coil domain containing 88B                                  | ENST00000492980 | 0,629514511 |
| A_33_P3821494  | AK094442         | LOC284939      | uncharacterized LOC284939                                          |                 | 0,629478955 |
| A_33_P3400424  | NM_001199324     | ZNF615         | zinc finger protein 615                                            | ENST00000391793 | 0,629439448 |
| A_32_P202759   | NM_177454        | FAM171B        | family with sequence similarity 171, member B                      | ENST00000272804 | 0,629290082 |
| A_33_P3420841  | ENST00000402116  | EIF3D          | eukaryotic translation initiation factor 3, subunit D              | ENST00000402116 | 0,629274545 |
| A_24_P50753    | NM_199040        | NUDT4          | nudix (nucleoside diphosphate linked moiety X)-type motif          | ENST00000337179 | 0,629136445 |
| A_33_P3281358  | ENST00000472621  | ARF3           | ADP-ribosylation factor 3                                          | ENST00000472621 | 0,62887231  |
| A_21_P0006483  | TCONS_00017140   | XLOC_007930    |                                                                    |                 | 0,628837074 |
| A_23_P252748   | NM_007152        | ZNF195         | zinc finger protein 195                                            | ENST00000526601 | 0,628762347 |
| A_33_P3252588  | NR_024485        | LOC100130093   | uncharacterized LOC100130093                                       | ENST00000480897 | 0,628339664 |
| A_33_P3418194  | NM_023946        | LYNX1          | Ly6/neurotoxin 1                                                   | ENST00000335822 | 0,628269048 |
| A_21_P0012915  | TCONS_I2_0002299 | XLOC_I2_012135 |                                                                    |                 | 0,628174091 |
| A_33_P3283828  | NM_001143980     | CCDC154        | coiled-coil domain containing 154                                  | ENST00000389176 | 0,627899646 |
| A_24_P126262   | NM_181704        | BAGE4          | B melanoma antigen family, member 4                                | ENST00000470054 | 0,627826219 |
| A_33_P3321055  | ENST00000464735  | TNFRSF19       | tumor necrosis factor receptor superfamily, member 19              | ENST00000464735 | 0,62769113  |
| A_32_P336776   | NM_194277        | FRMD7          | FERM domain containing 7                                           | ENST00000298542 | 0,627509085 |
| A_23_P84910    | NM_003446        | ZNF157         | zinc finger protein 157                                            | ENST00000377073 | 0,627421786 |
| A_23_P256603   | NM_001207008     | MLLT4          | myeloid/lymphoid or mixed-lineage leukemia (trithorax homologue 4) | ENST00000366809 | 0,627383308 |
| A_33_P3405285  | NM_001080554     | GSG1           | germ cell associated 1                                             | ENST00000229465 | 0,627370275 |
| A_23_P316472   | NM_144666        | DNHD1          | dynein heavy chain domain 1                                        | ENST00000254579 | 0,62729389  |
| A_33_P3240063  | NR_024182        | C14orf48       | chromosome 14 open reading frame 48                                |                 | 0,627078204 |
| A_19_P00319225 | NR_026867        | ZNF300P1       |                                                                    | ENST00000520773 | 0,626875532 |
| A_33_P3299309  | NM_001136136     | RPL28          | ribosomal protein L28                                              | ENST00000431533 | 0,626845743 |
| A_23_P122464   | NM_006299        | ZNF193         | zinc finger protein 193                                            | ENST00000252207 | 0,626731701 |
| A_21_P0007895  | ENST00000539956  | VSIG10         | V-set and immunoglobulin domain containing 10                      | ENST00000539956 | 0,626685419 |
| A_23_P99515    | NM_032849        | C13orf33       | chromosome 13 open reading frame 33                                | ENST00000380482 | 0,626567973 |
| A_24_P399694   | NM_033089        | ZCCHC3         | zinc finger, CCHC domain containing 3                              | ENST00000382352 | 0,62640212  |
| A_23_P46894    | NM_020549        | CHAT           | choline O-acetyltransferase                                        | ENST00000455728 | 0,626389846 |
| A_21_P0014589  | XR_110415        | LOC100507212   | uncharacterized LOC100507212                                       |                 | 0,626205053 |

|                |                  |                |                                                        |                 |             |
|----------------|------------------|----------------|--------------------------------------------------------|-----------------|-------------|
| A_21_P0000481  | NR_003939        | SNORD79        | small nucleolar RNA, C/D box 79                        |                 | 0,626123174 |
| A_23_P356554   | NM_004282        | BAG2           | BCL2-associated athanogene 2                           | ENST00000545080 | 0,626095463 |
| A_23_P114349   | NM_130776        | XAGE3          | X antigen family, member 3                             | ENST00000346279 | 0,625931131 |
| A_23_P128281   | NM_007333        | KLRC3          | killer cell lectin-like receptor subfamily C, member 3 | ENST00000381903 | 0,62572352  |
| A_21_P0000362  | NR_003026        | SNORA1         | small nucleolar RNA, H/ACA box 1                       | ENST00000529900 | 0,625613263 |
| A_21_P0013304  | TCONS_I2_0002655 | XLOC_I2_013808 |                                                        |                 | 0,625344707 |
| A_21_P0002192  | TCONS_00003621   | XLOC_001412    |                                                        |                 | 0,625310989 |
| A_21_P0002780  | ENST00000484046  | XLOC_002867    |                                                        | ENST00000484046 | 0,625015483 |
| A_33_P3313559  | AK126336         | ORMDL1         | ORM1-like 1 ( <i>S. cerevisiae</i> )                   | ENST00000409519 | 0,624904245 |
| A_24_P361158   | NM_018335        | ZNF839         | zinc finger protein 839                                | ENST00000420933 | 0,624811457 |
| A_21_P0000463  | NR_003688        | SNORD105B      | small nucleolar RNA, C/D box 105B                      |                 | 0,624785347 |
| A_21_P0013650  | TCONS_I2_0002934 | XLOC_I2_015212 |                                                        |                 | 0,624644865 |
| A_33_P3255741  | NM_007137        | ZNF81          | zinc finger protein 81                                 | ENST00000376954 | 0,624433738 |
| A_23_P395374   | NM_003539        | HIST1H4D       | histone cluster 1, H4d                                 | ENST00000340756 | 0,62427277  |
| A_19_P00317564 | ENST00000450294  | XLOC_001512    |                                                        | ENST00000450294 | 0,624267387 |
| A_33_P3210085  | NM_001047160     | NET1           | neuroepithelial cell transforming 1                    | ENST00000380337 | 0,624260611 |
| A_23_P30799    | NM_021018        | HIST1H3F       | histone cluster 1, H3f                                 | ENST00000446824 | 0,623931819 |
| A_21_P0011573  | TCONS_I2_0001112 | XLOC_I2_006013 |                                                        |                 | 0,623873223 |
| A_24_P136470   | NR_027795        | BTN2A3P        | butyrophilin, subfamily 2, member A3, pseudogene       | ENST00000463944 | 0,623854189 |
| A_23_P103503   | NM_002393        | MDM4           | Mdm4 p53 binding protein homolog (mouse)               | ENST00000391947 | 0,62382388  |
| A_33_P3384260  | ENST00000546500  | HNRNPA1        | heterogeneous nuclear ribonucleoprotein A1             | ENST00000546500 | 0,623735355 |
| A_33_P3239143  | NM_198458        | ZNF497         | zinc finger protein 497                                | ENST00000391697 | 0,623519254 |
| A_33_P3223678  | NM_014564        | LHX3           | LIM homeobox 3                                         | ENST00000325195 | 0,62347958  |
| A_21_P0011537  | XM_003119663     | LOC100507904   | uncharacterized LOC100507904                           |                 | 0,623221028 |
| A_23_P59714    | NR_026902        | MGC16142       | uncharacterized protein MGC16142                       |                 | 0,623158154 |
| A_23_P114084   | NM_000444        | PHEX           | phosphate regulating endopeptidase homolog, X-linked   | ENST00000537599 | 0,622997941 |
| A_33_P3386995  | NM_015914        | TXNDC11        | thioredoxin domain containing 11                       | ENST00000436567 | 0,622974457 |
| A_33_P3321369  | XR_109231        | LOC145757      | uncharacterized LOC145757                              |                 | 0,622289904 |
| A_33_P3418055  | NM_004234        | ZNF235         | zinc finger protein 235                                | ENST00000359844 | 0,622205779 |



|               |                  |                |                                                         |                 |             |
|---------------|------------------|----------------|---------------------------------------------------------|-----------------|-------------|
| A_33_P3290487 | NM_001172668     | ZNF668         | zinc finger protein 668                                 | ENST00000300849 | 0,621871775 |
| A_21_P0000271 | NR_002588        | SNORA4         | small nucleolar RNA, H/ACA box 4                        | ENST00000468362 | 0,621631312 |
| A_33_P3256088 | NR_037596        | FLJ14186       | uncharacterized LOC401149                               |                 | 0,621315112 |
| A_33_P3273266 | NR_024380        | LOC441666      | zinc finger protein 91 pseudogene                       |                 | 0,621062479 |
| A_33_P3276142 | NR_003260        | DNM1P46        | DNM1 pseudogene 46                                      | ENST00000448059 | 0,620726023 |
| A_32_P83465   | NM_001039703     | NBPF10         | neuroblastoma breakpoint family, member 10              | ENST00000369190 | 0,620630398 |
| A_21_P0013320 | TCONS_I2_0002664 | XLOC_I2_013873 |                                                         |                 | 0,620623719 |
| A_33_P3280875 | NM_006469        | IVNS1ABP       | influenza virus NS1A binding protein                    | ENST00000392007 | 0,620577225 |
| A_33_P3420020 | NM_001130858     | PIIP5K1        | diphosphoinositol pentakisphosphate kinase 1            | ENST00000335092 | 0,620576208 |
| A_21_P0000255 | NR_002561        | SNORD30        | small nucleolar RNA, C/D box 30                         |                 | 0,620405601 |
| A_21_P0000386 | NR_003070        | SNORD89        | small nucleolar RNA, C/D box 89                         |                 | 0,620117713 |
| A_33_P3350202 | NM_014484        | MOCS3          | molybdenum cofactor synthesis 3                         | ENST00000244051 | 0,619862342 |
| A_23_P340308  | NM_176888        | TAS2R19        | taste receptor, type 2, member 19                       | ENST00000390673 | 0,619780655 |
| A_21_P0000074 | NM_001168394     | C5orf41        | chromosome 5 open reading frame 41                      | ENST00000522692 | 0,619677405 |
| A_33_P3356525 | AK127393         | FLJ45482       | uncharacterized LOC645566                               |                 | 0,619513432 |
| A_33_P3490794 | NR_027132        | LOC145820      | uncharacterized LOC145820                               | ENST00000556053 | 0,619188693 |
| A_23_P46725   | NM_025209        | EPC1           | enhancer of polycomb homolog 1 (Drosophila)             | ENST00000263062 | 0,619176762 |
| A_33_P3255949 | NM_001113755     | TYMP           | thymidine phosphorylase                                 | ENST00000395678 | 0,618684837 |
| A_21_P0013373 | ENST00000446399  | XLOC_I2_013302 |                                                         | ENST00000446399 | 0,618539163 |
| A_23_P54517   | NM_006293        | TYRO3          | TYRO3 protein tyrosine kinase                           | ENST00000540218 | 0,618377833 |
| A_33_P3708413 | NM_003480        | MFAP5          | microfibrillar associated protein 5                     | ENST00000540087 | 0,618348782 |
| A_33_P3407990 | AK096102         | LOC100130193   | uncharacterized LOC100130193                            |                 | 0,618243512 |
| A_21_P0000288 | NR_002748        | SNORD45B       | small nucleolar RNA, C/D box 45B                        | ENST00000461653 | 0,618201222 |
| A_23_P40078   | NM_003400        | XPO1           | exportin 1 (CRM1 homolog, yeast)                        | ENST00000406957 | 0,617909405 |
| A_33_P3262276 | NM_001005280     | OR10A7         | olfactory receptor, family 10, subfamily A, member 7    | ENST00000326258 | 0,617870942 |
| A_33_P3396459 | ENST00000412877  | POLR2H         | polymerase (RNA) II (DNA directed) polypeptide H        | ENST00000412877 | 0,617835903 |
| A_33_P3631491 | AF307449         | CECR9          | cat eye syndrome chromosome region, candidate 9 (non-pr | ENST00000453421 | 0,617770886 |
| A_21_P0006243 | TCONS_00016231   | XLOC_007614    |                                                         |                 | 0,617661365 |
| A_21_P0006410 | ENST00000420865  | XLOC_007911    |                                                         | ENST00000420865 | 0,617646882 |

|                |                 |              |                                                                                   |                 |             |
|----------------|-----------------|--------------|-----------------------------------------------------------------------------------|-----------------|-------------|
| A_21_P0004756  | ENST00000453790 | XLOC_005748  |                                                                                   | ENST00000453790 | 0,617528353 |
| A_32_P69368    | NM_002166       | ID2          | inhibitor of DNA binding 2, dominant negative helix-loop-hel                      | ENST00000396290 | 0,617470045 |
| A_21_P0000039  | NM_001164234    | DDHD2        | DDHD domain containing 2                                                          | ENST00000519857 | 0,616930588 |
| A_24_P93206    | NM_207379       | TMEM179      | transmembrane protein 179                                                         | ENST00000556573 | 0,616872054 |
| A_32_P68148    | NR_027130       | ZNF738       | zinc finger protein 738                                                           |                 | 0,616698122 |
| A_24_P196704   | NM_182931       | MLL5         | myeloid/lymphoid or mixed-lineage leukemia 5 (trithorax ho                        | ENST00000495267 | 0,616251559 |
| A_23_P301925   | ENST00000361624 | COX1         | cytochrome c oxidase subunit I                                                    | ENST00000361624 | 0,616231387 |
| A_19_P00316919 | NR_027058       | LINC00338    | long intergenic non-protein coding RNA 338                                        | ENST00000434411 | 0,616070611 |
| A_21_P0000569  | NR_028474       | LOC100303749 | LSM3 homolog, U6 small nuclear RNA associated ( <i>S. cerevisiae</i> ) pseudogene |                 | 0,616047108 |
| A_33_P3233125  | NM_002779       | PSD          | pleckstrin and Sec7 domain containing                                             | ENST00000020673 | 0,615967959 |
| A_33_P3250343  | NR_028326       | LOC100133161 | uncharacterized LOC100133161                                                      |                 | 0,615893318 |
| A_33_P3218797  | ENST00000370177 | PPDPF        | pancreatic progenitor cell differentiation and proliferation f                    | ENST00000370177 | 0,615787948 |
| A_24_P37712    | NM_003215       | TEC          | tec protein tyrosine kinase                                                       | ENST00000381501 | 0,615782052 |
| A_33_P3383601  | NM_198180       | QRFP         | pyroglutamylated RFamide peptide                                                  | ENST00000343079 | 0,615531499 |
| A_33_P3288649  | NM_018951       | HOXA10       | homeobox A10                                                                      | ENST00000381834 | 0,615490646 |
| A_33_P3278298  | AK131362        | NOM1         | nucleolar protein with MIF4G domain 1                                             |                 | 0,615348505 |
| A_21_P0001488  | TCONS_00001448  | XLOC_000771  |                                                                                   |                 | 0,615280336 |
| A_23_P205789   | NM_002041       | GABPB1       | GA binding protein transcription factor, beta subunit 1                           | ENST00000429662 | 0,615228701 |
| A_23_P379692   | NM_174943       | C14orf178    | chromosome 14 open reading frame 178                                              | ENST00000556047 | 0,615147632 |
| A_21_P0009236  | TCONS_00025349  | XLOC_012169  |                                                                                   |                 | 0,615144529 |
| A_21_P0010647  | NM_001012419    | ANKRD20A3    | ankyrin repeat domain 20 family, member A3                                        | ENST00000357336 | 0,614851334 |
| A_19_P00809614 | NR_002819       | MALAT1       |                                                                                   |                 | 0,614676555 |
| A_24_P147540   | NM_001190467    | FLJ22184     | putative uncharacterized protein FLJ22184                                         | ENST00000327607 | 0,614535122 |
| A_21_P0008897  | BC104446        | LOC283867    | uncharacterized LOC283867                                                         |                 | 0,614262465 |
| A_33_P3479999  | BC014228        | LOC494150    | prohibitin pseudogene                                                             |                 | 0,614226481 |
| A_33_P3299170  | NM_201412       | LUC7L        | LUC7-like ( <i>S. cerevisiae</i> )                                                | ENST00000490762 | 0,61417211  |
| A_33_P3333224  | NM_032575       | GLIS2        | GLIS family zinc finger 2                                                         | ENST00000262366 | 0,614139576 |
| A_33_P3332970  | NM_005127       | CLEC2B       | C-type lectin domain family 2, member B                                           |                 | 0,614115457 |
| A_32_P219148   | BC030211        | LOC497257    | uncharacterized LOC497257                                                         |                 | 0,613859351 |

|                |                 |             |                                                                                   |                 |             |
|----------------|-----------------|-------------|-----------------------------------------------------------------------------------|-----------------|-------------|
| A_21_P0000500  | NR_004399       | SNORD86     | small nucleolar RNA, C/D box 86                                                   | ENST00000484998 | 0,613577347 |
| A_23_P109254   | NM_184234       | RBM39       | RNA binding motif protein 39                                                      | ENST00000465158 | 0,613470983 |
| A_32_P151544   | NM_000224       | KRT18       | keratin 18                                                                        | ENST00000548496 | 0,61340772  |
| A_33_P3668839  | NR_036539       | LOC644656   | uncharacterized LOC644656                                                         |                 | 0,613371701 |
| A_33_P3244998  | NM_001007022    | ODF2L       | outer dense fiber of sperm tails 2-like                                           | ENST00000502413 | 0,6133699   |
| A_19_P00317447 | ENST00000473756 | XLOC_002736 | 0                                                                                 | ENST00000473756 | 0,61330605  |
| A_33_P3329433  | ENST00000392423 | TTN         | titin                                                                             | ENST00000392423 | 0,613299127 |
| A_33_P3542599  | CV322587        | SNORA2A     | small nucleolar RNA, H/ACA box 2A                                                 |                 | 0,613254891 |
| A_33_P3316318  | ENST00000395431 | CEP120      | centrosomal protein 120kDa                                                        | ENST00000395431 | 0,61308627  |
| A_21_P0000485  | NR_003943       | SNORD77     | small nucleolar RNA, C/D box 77                                                   |                 | 0,613039954 |
| A_24_P402836   | NM_003441       | ZNF141      | zinc finger protein 141                                                           | ENST00000240499 | 0,612998098 |
| A_21_P0008252  | TCONS_00022267  | XLOC_010588 |                                                                                   |                 | 0,612928624 |
| A_33_P3381022  | ENST00000362035 | ICMT        | isoprenylcysteine carboxyl methyltransferase                                      | ENST00000362035 | 0,612608352 |
| A_24_P320103   | NM_004991       | MECOM       | MDS1 and EVI1 complex locus                                                       | ENST00000485957 | 0,61230887  |
| A_21_P0004760  | THC2677844      | XLOC_005764 |                                                                                   |                 | 0,612278433 |
| A_33_P3256532  | NM_032120       | C7orf64     | chromosome 7 open reading frame 64                                                | ENST00000450580 | 0,612245498 |
| A_24_P332862   | NM_001076678    | ZNF493      | zinc finger protein 493                                                           | ENST00000418100 | 0,612222741 |
| A_23_P402751   | ENST00000361739 | COX2        | cytochrome c oxidase subunit II                                                   | ENST00000361739 | 0,612030012 |
| A_24_P301629   | NM_003445       | ZNF155      | zinc finger protein 155                                                           | ENST00000425747 | 0,611724542 |
| A_23_P414308   | NM_144606       | FLCN        | folliculin                                                                        | ENST00000389169 | 0,611600987 |
| A_33_P3298942  | ENST00000326831 | ATP10B      | ATPase, class V, type 10B                                                         | ENST00000326831 | 0,611564411 |
| A_33_P3244728  | NM_004525       | LRP2        | low density lipoprotein receptor-related protein 2                                | ENST00000263816 | 0,611243796 |
| A_23_P102607   | ENST00000373222 | CHD6        | chromodomain helicase DNA binding protein 6                                       | ENST00000373222 | 0,611206416 |
| A_19_P00318492 | ENST00000429578 | P39191      |                                                                                   | ENST00000429578 | 0,610991545 |
| A_21_P0005449  | TCONS_00013649  | XLOC_006303 |                                                                                   |                 | 0,610908973 |
| A_23_P93704    | NM_001004323    | C7orf61     | chromosome 7 open reading frame 61                                                | ENST00000496728 | 0,610802115 |
| A_21_P0002967  | ENST00000481004 | XLOC_002688 |                                                                                   | ENST00000481004 | 0,610740207 |
| A_23_P60101    | NM_030895       | ZNF696      | zinc finger protein 696                                                           | ENST00000330143 | 0,610682563 |
| A_33_P3275959  | BC001407        | SLC25A16    | solute carrier family 25 (mitochondrial carrier; Graves disease autoantigen), mem |                 | 0,610673321 |

|                |                  |                |                                                              |                 |             |
|----------------|------------------|----------------|--------------------------------------------------------------|-----------------|-------------|
| A_33_P3270228  | ENST00000376497  | CLCN6          | chloride channel 6                                           | ENST00000376497 | 0,610667375 |
| A_21_P0000266  | NR_002581        | SNORA72        | small nucleolar RNA, H/ACA box 72                            |                 | 0,61042622  |
| A_23_P79145    | NM_144694        | ZNF570         | zinc finger protein 570                                      | ENST00000330173 | 0,610214222 |
| A_23_P76749    | NM_020692        | GALNTL1        | UDP-N-acetyl-alpha-D-galactosamine:polypeptide N-acetylgl    | ENST00000553471 | 0,609905447 |
| A_19_P00329806 | NR_003716        | HOTAIR         |                                                              |                 | 0,609844835 |
| A_33_P3420640  | NM_001004711     | OR4D9          | olfactory receptor, family 4, subfamily D, member 9          | ENST00000329328 | 0,609822888 |
| A_21_P0001714  | TCONS_00002259   | XLOC_000618    |                                                              |                 | 0,609812178 |
| A_23_P308058   | NM_172367        | TUSC5          | tumor suppressor candidate 5                                 | ENST00000333813 | 0,609540053 |
| A_21_P0012609  | TCONS_I2_0002075 | XLOC_I2_010830 |                                                              |                 | 0,609461144 |
| A_33_P3325306  | ENST00000463841  | HSPE1          | heat shock 10kDa protein 1 (chaperonin 10)                   | ENST00000463841 | 0,609356709 |
| A_21_P0000842  | NR_038927        | LOC100506660   | uncharacterized LOC100506660                                 |                 | 0,609326825 |
| A_23_P252748   | NM_007152        | ZNF195         | zinc finger protein 195                                      | ENST00000526601 | 0,609290459 |
| A_23_P259357   | NM_001001479     | SLC35E4        | solute carrier family 35, member E4                          | ENST00000343605 | 0,609263008 |
| A_33_P3238335  | ENST00000370587  | MCOLN3         | mucolipin 3                                                  | ENST00000370587 | 0,609033463 |
| A_33_P3424566  | XR_108650        | FLJ38717       | FLJ38717 protein                                             |                 | 0,609021566 |
| A_23_P120170   | NM_145702        | TIGD1          | tigger transposable element derived 1                        | ENST00000408957 | 0,609005246 |
| A_24_P57898    | NM_080606        | BHLHE23        | basic helix-loop-helix family, member e23                    | ENST00000370346 | 0,608998506 |
| A_33_P3353345  | NM_014351        | SULT4A1        | sulfotransferase family 4A, member 1                         | ENST00000330884 | 0,608969651 |
| A_33_P3397150  | NM_001190467     | FLJ22184       | putative uncharacterized protein FLJ22184                    | ENST00000327607 | 0,608859277 |
| A_33_P3302662  | ENST00000461758  | TLE4           | transducin-like enhancer of split 4 (E(sp1) homolog, Drosop  | ENST00000461758 | 0,608857316 |
| A_23_P109254   | NM_184234        | RBM39          | RNA binding motif protein 39                                 | ENST00000465158 | 0,608831005 |
| A_21_P0009166  | ENST00000447729  | XLOC_012176    |                                                              | ENST00000447729 | 0,608789322 |
| A_23_P157416   | NM_032164        | ZNF394         | zinc finger protein 394                                      | ENST00000337673 | 0,608785301 |
| A_24_P378402   | NM_152457        | ZNF597         | zinc finger protein 597                                      | ENST00000301744 | 0,608531852 |
| A_23_P107963   | NM_000148        | FUT1           | fucosyltransferase 1 (galactoside 2-alpha-L-fucosyltransfera | ENST00000310160 | 0,608510053 |
| A_33_P3481987  | NM_213606        | SLC16A12       | solute carrier family 16, member 12 (monocarboxylic acid tr  | ENST00000504447 | 0,608347911 |
| A_33_P3355407  | NR_004404        | RNU105A        | RNA, U105A small nucleolar                                   | ENST00000437681 | 0,60818964  |
| A_33_P3386506  | NM_001144961     | NFKBIL1        | nuclear factor of kappa light polypeptide gene enhancer in I | ENST00000460131 | 0,608186578 |
| A_21_P0005087  | TCONS_00012361   | XLOC_005921    |                                                              |                 | 0,608156153 |

|                |                |              |                                                                 |                 |             |
|----------------|----------------|--------------|-----------------------------------------------------------------|-----------------|-------------|
| A_33_P3337959  | AK128227       | LOC100130236 | uncharacterized LOC100130236                                    |                 | 0,608142355 |
| A_23_P164341   | NM_014232      | VAMP2        | vesicle-associated membrane protein 2 (synaptobrevin 2)         | ENST00000316509 | 0,607966285 |
| A_23_P252748   | NM_007152      | ZNF195       | zinc finger protein 195                                         | ENST00000526601 | 0,607905354 |
| A_33_P3243878  | NM_198181      | GOLGA6L9     | golgin A6 family-like 9                                         | ENST00000306827 | 0,607812123 |
| A_33_P3247540  | NR_027420      | LOC389834    | ankyrin repeat domain 57 pseudogene                             |                 | 0,607783267 |
| A_23_P13929    | NM_031474      | NRIP2        | nuclear receptor interacting protein 2                          | ENST00000546074 | 0,607690478 |
| A_33_P3301381  | NM_198557      | RBM43        | RNA binding motif protein 43                                    | ENST00000331426 | 0,607688222 |
| A_23_P163402   | NM_000499      | CYP1A1       | cytochrome P450, family 1, subfamily A, polypeptide 1           | ENST00000379727 | 0,607681469 |
| A_33_P3337719  | NR_004846      | LOC100134868 | uncharacterized LOC100134868                                    |                 | 0,60756578  |
| A_21_P0000346  | NR_002994      | SNORA36B     | small nucleolar RNA, H/ACA box 36B                              |                 | 0,607290214 |
| A_23_P217968   | NM_016028      | SUV420H1     | suppressor of variegation 4-20 homolog 1 (Drosophila)           | ENST00000405515 | 0,607282564 |
| A_24_P232790   | NR_024630      | C14orf162    | chromosome 14 open reading frame 162                            |                 | 0,607271632 |
| A_24_P195669   | AK074680       | MYO15B       | myosin XVB pseudogene                                           |                 | 0,606952686 |
| A_23_P107963   | NM_000148      | FUT1         | fucosyltransferase 1 (galactoside 2-alpha-L-fucosyltransferase) | ENST00000310160 | 0,606931657 |
| A_21_P0000498  | NR_004397      | SNORD1C      | small nucleolar RNA, C/D box 1C                                 | ENST00000448136 | 0,60691782  |
| A_21_P0000898  | NR_040073      | LOC100131234 | familial acute myelogenous leukemia related factor              |                 | 0,606895233 |
| A_33_P3300635  | NM_006212      | PFKFB2       | 6-phosphofructo-2-kinase/fructose-2,6-biphosphatase 2           | ENST00000367080 | 0,60684893  |
| A_33_P3321324  | XR_108343      | FLJ37786     | uncharacterized LOC642691                                       |                 | 0,606751471 |
| A_24_P161261   | NM_001031618   | SPDYE2       | speedy homolog E2 (Xenopus laevis)                              | ENST00000432940 | 0,60672139  |
| A_23_P11390    | NM_004679      | VCY          | variable charge, Y-linked                                       | ENST00000250823 | 0,606632163 |
| A_19_P00802390 | TCONS_00015178 | XLOC_007231  |                                                                 |                 | 0,606426097 |
| A_23_P109254   | NM_184234      | RBM39        | RNA binding motif protein 39                                    | ENST00000465158 | 0,606241359 |
| A_21_P0006262  | THC2746760     | XLOC_007676  |                                                                 |                 | 0,606189068 |
| A_23_P108342   | NM_016536      | ZNF571       | zinc finger protein 571                                         | ENST00000358744 | 0,606163928 |
| A_23_P90320    | NM_013359      | ZNF221       | zinc finger protein 221                                         | ENST00000251269 | 0,606133918 |
| A_24_P935682   | XR_110905      | LOC100131541 | uncharacterized LOC100131541                                    |                 | 0,606034617 |
| A_33_P3259662  | NM_003435      | ZNF134       | zinc finger protein 134                                         | ENST00000396161 | 0,605960527 |
| A_24_P941787   | NM_003913      | PRPF4B       | PRP4 pre-mRNA processing factor 4 homolog B (yeast)             | ENST00000480058 | 0,605937144 |
| A_23_P74068    | NM_002440      | MSH4         | mutS homolog 4 (E. coli)                                        | ENST00000263187 | 0,605816453 |



|                |                  |                |                                                              |                 |             |
|----------------|------------------|----------------|--------------------------------------------------------------|-----------------|-------------|
| A_33_P3403082  | NR_027686        | LINC00176      | long intergenic non-protein coding RNA 176                   |                 | 0,60573207  |
| A_21_P0000241  | NR_002436        | SNORA33        | small nucleolar RNA, H/ACA box 33                            |                 | 0,605532108 |
| A_21_P0012910  | ENST00000463434  | XLOC_I2_012081 |                                                              | ENST00000463434 | 0,605530142 |
| A_19_P00315551 | NR_026656        | LOC400043      | uncharacterized LOC400043                                    |                 | 0,605306258 |
| A_24_P282416   | NM_007313        | ABL1           | c-abl oncogene 1, non-receptor tyrosine kinase               | ENST00000393293 | 0,605161073 |
| A_21_P0010725  | THC2561048       | XLOC_I2_000416 |                                                              |                 | 0,605068264 |
| A_23_P109254   | NM_184234        | RBM39          | RNA binding motif protein 39                                 | ENST00000465158 | 0,604896131 |
| A_33_P3282384  | ENST00000377277  | C5orf25        | chromosome 5 open reading frame 25                           | ENST00000377277 | 0,604874752 |
| A_21_P0005594  | TCONS_00014248   | XLOC_006336    |                                                              |                 | 0,604680255 |
| A_23_P103276   | NM_138417        | KTI12          | KTI12 homolog, chromatin associated ( <i>S. cerevisiae</i> ) | ENST00000371614 | 0,604564359 |
| A_23_P118392   | NM_016084        | RASD1          | RAS, dexamethasone-induced 1                                 | ENST00000225688 | 0,60451938  |
| A_33_P3228988  | ENST00000435033  | ZNF799         | zinc finger protein 799                                      | ENST00000435033 | 0,604508644 |
| A_23_P118392   | NM_016084        | RASD1          | RAS, dexamethasone-induced 1                                 | ENST00000225688 | 0,604495853 |
| A_21_P0002624  | TCONS_00004986   | XLOC_001823    |                                                              |                 | 0,604480706 |
| A_21_P0000370  | NR_003036        | SNORD6         | small nucleolar RNA, C/D box 6                               |                 | 0,604405866 |
| A_23_P371254   | NM_176884        | TAS2R43        | taste receptor, type 2, member 43                            | ENST00000531678 | 0,604335803 |
| A_23_P109254   | NM_184234        | RBM39          | RNA binding motif protein 39                                 | ENST00000465158 | 0,604226937 |
| A_33_P3253804  | NM_005195        | CEBPD          | CCAAT/enhancer binding protein (C/EBP), delta                | ENST00000542385 | 0,604164016 |
| A_23_P208288   | NM_020657        | ZNF304         | zinc finger protein 304                                      | ENST00000282286 | 0,604099565 |
| A_33_P3415340  | ENST00000410052  | ALS2           | amyotrophic lateral sclerosis 2 (juvenile)                   | ENST00000410052 | 0,603952589 |
| A_23_P128641   | NM_005800        | USPL1          | ubiquitin specific peptidase like 1                          | ENST00000255304 | 0,603900312 |
| A_21_P0013593  | TCONS_I2_0002884 | XLOC_I2_014853 |                                                              |                 | 0,603896585 |
| A_33_P3405946  | NM_184234        | RBM39          | RNA binding motif protein 39                                 | ENST00000465158 | 0,603580698 |
| A_33_P3271105  | NM_001135654     | PABPC4         | poly(A) binding protein, cytoplasmic 4 (inducible form)      | ENST00000531243 | 0,603292839 |
| A_21_P0011501  | ENST00000446912  | XLOC_I2_005350 |                                                              | ENST00000446912 | 0,60321273  |
| A_23_P350074   | NM_001039876     | C19orf46       | chromosome 19 open reading frame 46                          | ENST00000465425 | 0,602946636 |
| A_33_P3387455  | NM_001029880     | SFMBT2         | Scm-like with four mbt domains 2                             | ENST00000379711 | 0,602785189 |
| A_21_P0009788  | TCONS_00027537   | XLOC_013064    |                                                              |                 | 0,601999195 |
| A_21_P0007151  | ENST00000441638  | XLOC_009339    |                                                              | ENST00000441638 | 0,601977134 |

|               |                 |                |                                                                |                 |             |
|---------------|-----------------|----------------|----------------------------------------------------------------|-----------------|-------------|
| A_33_P3357382 | ENST00000437847 | POGZ           | pogo transposable element with ZNF domain                      | ENST00000437847 | 0,601906991 |
| A_21_P0007169 | TCONS_00019195  | XLOC_009021    |                                                                |                 | 0,601870915 |
| A_33_P3703637 | AK095655        | LOC285300      | uncharacterized LOC285300                                      |                 | 0,601714521 |
| A_23_P11005   | NM_014272       | ADAMTS7        | ADAM metalloproteinase with thrombospondin type 1 motif        | ENST00000388820 | 0,601429353 |
| A_23_P114057  | NM_017789       | SEMA4C         | sema domain, immunoglobulin domain (Ig), transmembrane         | ENST00000467747 | 0,601387959 |
| A_23_P366216  | NM_003524       | HIST1H2BH      | histone cluster 1, H2bh                                        | ENST00000356350 | 0,600841492 |
| A_23_P103256  | NM_021023       | CFHR3          | complement factor H-related 3                                  | ENST00000367427 | 0,600623886 |
| A_23_P355471  | NM_201636       | TBXA2R         | thromboxane A2 receptor                                        | ENST00000411851 | 0,600563478 |
| A_21_P0002693 | TCONS_00004629  | XLOC_002543    |                                                                |                 | 0,600538971 |
| A_24_P92558   | NM_001039891    | ZNF674         | zinc finger protein 674                                        | ENST00000414387 | 0,600505342 |
| A_23_P252748  | NM_007152       | ZNF195         | zinc finger protein 195                                        | ENST00000526601 | 0,600283002 |
| A_24_P340853  | NM_032789       | PARP10         | poly (ADP-ribose) polymerase family, member 10                 | ENST00000527262 | 0,600169932 |
| A_23_P163546  | NM_005679       | TAF1C          | TATA box binding protein (TBP)-associated factor, RNA poly     | ENST00000378541 | 0,599627778 |
| A_21_P0000287 | NR_002746       | SNORD47        | small nucleolar RNA, C/D box 47                                |                 | 0,599585935 |
| A_33_P3249401 | ENST00000391859 | CD37           | CD37 molecule                                                  | ENST00000391859 | 0,599552438 |
| A_33_P3362326 | ENST00000409177 | FHL2           | four and a half LIM domains 2                                  | ENST00000409177 | 0,599344851 |
| A_21_P0011311 | THC2520829      | XLOC_I2_004611 |                                                                |                 | 0,59932401  |
| A_23_P109254  | NM_184234       | RBM39          | RNA binding motif protein 39                                   | ENST00000465158 | 0,599016615 |
| A_21_P0014947 | ENST00000541151 | LOC100507404   |                                                                | ENST00000541151 | 0,598861089 |
| A_23_P16415   | NM_002333       | LRP3           | low density lipoprotein receptor-related protein 3             | ENST00000431491 | 0,598760903 |
| A_23_P415558  | NM_012256       | ZNF212         | zinc finger protein 212                                        | ENST00000335870 | 0,598748124 |
| A_33_P3269278 | NM_153257       | ZNF461         | zinc finger protein 461                                        | ENST00000396896 | 0,598718234 |
| A_21_P0013123 | ENST00000439891 | XLOC_I2_012388 |                                                                | ENST00000439891 | 0,598628363 |
| A_33_P3330125 | NM_138929       | DIABLO         | diablo, IAP-binding mitochondrial protein                      | ENST00000413918 | 0,59850425  |
| A_23_P120812  | NM_020070       | IGLL1          | immunoglobulin lambda-like polypeptide 1                       | ENST00000330377 | 0,598494057 |
| A_21_P0000161 | NM_001204911    | C16orf57       | chromosome 16 open reading frame 57                            |                 | 0,598449174 |
| A_33_P3247372 | AK124064        | LOC400927      | TPTE and PTEN homologous inositol lipid phosphatase pseudogene |                 | 0,598319353 |
| A_23_P115861  | NM_145312       | ZNF485         | zinc finger protein 485                                        | ENST00000374437 | 0,598187377 |
| A_33_P3555368 | AK129597        | FLJ26086       | uncharacterized LOC440129                                      |                 | 0,598150077 |

|                |                  |                |                                                                                    |                 |             |
|----------------|------------------|----------------|------------------------------------------------------------------------------------|-----------------|-------------|
| A_33_P3260787  | ENST00000342616  | RUFY2          | RUN and FYVE domain containing 2                                                   | ENST00000342616 | 0,598050398 |
| A_24_P860703   | NR_015366        | LOC388796      | uncharacterized LOC388796                                                          |                 | 0,598014862 |
| A_21_P0014518  | XR_110188        | LOC100507624   | uncharacterized LOC100507624                                                       |                 | 0,597959152 |
| A_33_P3404671  | NR_024567        | LOC100130557   | uncharacterized LOC100130557                                                       |                 | 0,597930596 |
| A_23_P109254   | NM_184234        | RBM39          | RNA binding motif protein 39                                                       | ENST00000465158 | 0,597809691 |
| A_23_P63219    | NM_015100        | POGZ           | pogo transposable element with ZNF domain                                          | ENST00000368863 | 0,597745343 |
| A_33_P3398862  | NM_004040        | RHOB           | ras homolog gene family, member B                                                  | ENST00000272233 | 0,597741601 |
| A_23_P373927   | NM_015051        | ERP44          | endoplasmic reticulum protein 44                                                   | ENST00000262455 | 0,597725716 |
| A_21_P0007077  | TCONS_00018816   | XLOC_008613    |                                                                                    |                 | 0,597462759 |
| A_32_P319858   | NM_198478        | NKPD1          | NTPase, KAP family P-loop domain containing 1                                      | ENST00000429338 | 0,597456543 |
| A_21_P0010594  | TCONS_I2_0000096 | XLOC_I2_000727 |                                                                                    |                 | 0,597366229 |
| A_33_P3317623  | NR_002938        | LOC284379      | solute carrier family 7 (cationic amino acid transporter, y+ system), member 3 pse |                 | 0,597344411 |
| A_24_P415280   | NM_018144        | SEC61A2        | Sec61 alpha 2 subunit ( <i>S. cerevisiae</i> )                                     | ENST00000426560 | 0,597237906 |
| A_21_P0012887  | ENST00000343123  | XLOC_I2_011911 |                                                                                    | ENST00000343123 | 0,597140292 |
| A_23_P353742   | NM_017749        | AMBRA1         | autophagy/beclin-1 regulator 1                                                     | ENST00000458649 | 0,596884936 |
| A_24_P366777   | ENST00000344859  | NOTCH2NL       | notch 2 N-terminal like                                                            | ENST00000344859 | 0,59684121  |
| A_33_P3711318  | AK001439         | LOC257152      | uncharacterized LOC257152                                                          |                 | 0,596795743 |
| A_23_P117261   | NM_130806        | RXFP2          | relaxin/insulin-like family peptide receptor 2                                     | ENST00000298386 | 0,596226526 |
| A_23_P114084   | NM_000444        | PHEX           | phosphate regulating endopeptidase homolog, X-linked                               | ENST00000537599 | 0,596150841 |
| A_24_P359405   | NM_178502        | DTX3           | deltex homolog 3 ( <i>Drosophila</i> )                                             | ENST00000549583 | 0,596120544 |
| A_21_P0010871  | NR_026566        | BMS1P1         | BMS1 pseudogene 1                                                                  | ENST00000445221 | 0,596117065 |
| A_21_P0000314  | NR_002958        | SNORA17        | small nucleolar RNA, H/ACA box 17                                                  | ENST00000447221 | 0,595821029 |
| A_33_P3325120  | ENST00000367203  | SOX13          | SRY (sex determining region Y)-box 13                                              | ENST00000367203 | 0,595774078 |
| A_19_P00316719 | ENST00000451392  | XLOC_I2_008434 |                                                                                    | ENST00000451392 | 0,595762165 |
| A_23_P109254   | NM_184234        | RBM39          | RNA binding motif protein 39                                                       | ENST00000465158 | 0,595740978 |
| A_23_P500734   | NM_015100        | POGZ           | pogo transposable element with ZNF domain                                          | ENST00000368863 | 0,595517672 |
| A_23_P143143   | NM_002166        | ID2            | inhibitor of DNA binding 2, dominant negative helix-loop-he                        | ENST00000331129 | 0,595498489 |
| A_33_P3391791  | NM_206809        | MOG            | myelin oligodendrocyte glycoprotein                                                | ENST00000485211 | 0,595141757 |
| A_33_P3379841  | NR_026928        | CG030          | uncharacterized CG030                                                              |                 | 0,595050426 |

|                |                  |                |                                                            |                 |             |
|----------------|------------------|----------------|------------------------------------------------------------|-----------------|-------------|
| A_24_P921155   | NM_015412        | C3orf17        | chromosome 3 open reading frame 17                         | ENST00000383675 | 0,594907723 |
| A_21_P0011562  | TCONS_I2_0001102 | XLOC_I2_005933 |                                                            |                 | 0,594859107 |
| A_23_P52885    | NM_024631        | C11orf61       | chromosome 11 open reading frame 61                        | ENST00000526629 | 0,594732429 |
| A_23_P105495   | NM_023922        | TAS2R14        | taste receptor, type 2, member 14                          | ENST00000381852 | 0,594656948 |
| A_23_P146885   | NM_018949        | UTS2R          | urotensin 2 receptor                                       | ENST00000313135 | 0,594648343 |
| A_23_P303803   | NM_152474        | C19orf18       | chromosome 19 open reading frame 18                        | ENST00000314391 | 0,594601431 |
| A_21_P0008366  | TCONS_00022580   | XLOC_010893    |                                                            |                 | 0,594601281 |
| A_23_P355439   | NM_170745        | HIST1H2AA      | histone cluster 1, H2aa                                    | ENST00000297012 | 0,594426238 |
| A_19_P00317237 | XR_132505        | LOC100653004   |                                                            |                 | 0,59422814  |
| A_33_P3336696  | ENST00000361335  | ND4L           | NADH dehydrogenase, subunit 4L (complex I)                 | ENST00000361335 | 0,594142266 |
| A_21_P0000300  | NR_002918        | SNORA48        | small nucleolar RNA, H/ACA box 48                          |                 | 0,594122996 |
| A_21_P0002876  | ENST00000503572  | XLOC_003245    |                                                            | ENST00000503572 | 0,594087767 |
| A_23_P93258    | NM_003537        | HIST1H3B       | histone cluster 1, H3b                                     | ENST00000244661 | 0,593955781 |
| A_24_P289383   | NM_017780        | CHD7           | chromodomain helicase DNA binding protein 7                | ENST00000423902 | 0,593768109 |
| A_33_P3789693  | XR_108934        | MGC24103       | uncharacterized MGC24103                                   |                 | 0,59376036  |
| A_23_P252748   | NM_007152        | ZNF195         | zinc finger protein 195                                    | ENST00000526601 | 0,593573668 |
| A_21_P0014782  | XR_132564        | LOC100652913   | uncharacterized LOC100652913                               |                 | 0,593480346 |
| A_33_P3340718  | NM_021140        | KDM6A          | lysine (K)-specific demethylase 6A                         | ENST00000334516 | 0,593389677 |
| A_33_P3297517  | NM_001243879     | TRA2B          | transformer 2 beta homolog (Drosophila)                    | ENST00000342294 | 0,593339616 |
| A_23_P118392   | NM_016084        | RASD1          | RAS, dexamethasone-induced 1                               | ENST00000225688 | 0,593289708 |
| A_24_P361167   | NM_020920        | CHD8           | chromodomain helicase DNA binding protein 8                | ENST00000557364 | 0,593106789 |
| A_21_P0011020  | AK126420         | XLOC_I2_002790 |                                                            |                 | 0,593093965 |
| A_33_P3317387  | BC033823         | DNAJC3         | DnaJ (Hsp40) homolog, subfamily C, member 3                |                 | 0,593078675 |
| A_23_P114626   | NM_000488        | SERPINC1       | serpin peptidase inhibitor, clade C (antithrombin), member | ENST00000351522 | 0,592986239 |
| A_33_P3306287  | NM_024086        | METTL16        | methyltransferase like 16                                  | ENST00000399834 | 0,592821285 |
| A_21_P0005574  | DA832634         | XLOC_006224    |                                                            |                 | 0,592569404 |
| A_33_P3331726  | NR_027451        | LOC647979      | uncharacterized LOC647979                                  |                 | 0,592563265 |
| A_21_P0009688  | TCONS_00026911   | XLOC_012983    |                                                            |                 | 0,592545235 |
| A_33_P3266923  | NM_014916        | LMTK2          | lemur tyrosine kinase 2                                    | ENST00000297293 | 0,592508056 |

|                |                  |                |                                                              |                 |             |
|----------------|------------------|----------------|--------------------------------------------------------------|-----------------|-------------|
| A_23_P114057   | NM_017789        | SEMA4C         | sema domain, immunoglobulin domain (Ig), transmembran        | ENST00000467747 | 0,592504527 |
| A_19_P00321789 | ENST00000440246  | XLOC_005464    |                                                              | ENST00000440246 | 0,592450027 |
| A_24_P785293   | NR_003098        | SNHG1          | small nucleolar RNA host gene 1 (non-protein coding)         |                 | 0,592448763 |
| A_23_P103276   | NM_138417        | KTI12          | KTI12 homolog, chromatin associated ( <i>S. cerevisiae</i> ) | ENST00000371614 | 0,592391641 |
| A_33_P3211153  | NM_133450        | ANKS3          | ankyrin repeat and sterile alpha motif domain containing 3   | ENST00000304283 | 0,592316593 |
| A_23_P163209   | NM_020396        | BCL2L10        | BCL2-like 10 (apoptosis facilitator)                         | ENST00000260442 | 0,592120854 |
| A_21_P0012392  | TCONS_I2_0001885 | XLOC_I2_009884 |                                                              |                 | 0,592039202 |
| A_21_P0006524  | ENST00000440430  | XLOC_008110    |                                                              | ENST00000440430 | 0,591934727 |
| A_21_P0010313  | TCONS_00029224   | XLOC_013949    |                                                              |                 | 0,591851183 |
| A_21_P0000329  | NR_002974        | SNORA42        | small nucleolar RNA, H/ACA box 42                            |                 | 0,591793039 |
| A_33_P3270509  | NM_003031        | SIAH1          | seven in absentia homolog 1 ( <i>Drosophila</i> )            | ENST00000356721 | 0,591786869 |
| A_23_P108342   | NM_016536        | ZNF571         | zinc finger protein 571                                      | ENST00000358744 | 0,591761451 |
| A_33_P3314559  | NM_138453        | RAB3C          | RAB3C, member RAS oncogene family                            | ENST00000282878 | 0,591743844 |
| A_33_P3368139  | NM_005921        | MAP3K1         | mitogen-activated protein kinase kinase kinase 1             | ENST00000469188 | 0,591730987 |
| A_21_P0000092  | NM_001174108     | ZBED6          | zinc finger, BED-type containing 6                           | ENST00000550078 | 0,591665745 |
| A_33_P3235400  | NM_004494        | HDGF           | hepatoma-derived growth factor                               | ENST00000406805 | 0,591551833 |
| A_23_P117261   | NM_130806        | RXFP2          | relaxin/insulin-like family peptide receptor 2               | ENST00000298386 | 0,591526981 |
| A_33_P3262555  | NM_001174118     | MEX3D          | mex-3 homolog D ( <i>C. elegans</i> )                        | ENST00000388824 | 0,591460786 |
| A_23_P215132   | NM_014149        | WDR91          | WD repeat domain 91                                          | ENST00000466182 | 0,591405234 |
| A_23_P107684   | NM_014347        | ZNF324         | zinc finger protein 324                                      | ENST00000196482 | 0,591303232 |
| A_24_P677642   | NR_038275        | FLJ31813       | FAM21B pseudogene                                            | ENST00000456967 | 0,591290307 |
| A_23_P376870   | NM_174891        | C14orf79       | chromosome 14 open reading frame 79                          | ENST00000548641 | 0,591033764 |
| A_19_P00319422 | NM_001145206     | KIAA1671       |                                                              | ENST00000507732 | 0,59094802  |
| A_23_P122464   | NM_006299        | ZNF193         | zinc finger protein 193                                      | ENST00000252207 | 0,590877947 |
| A_33_P3888365  | NM_018364        | RSBN1          | round spermatid basic protein 1                              | ENST00000476412 | 0,590856137 |
| A_23_P322      | NM_182690        | EFNA4          | ephrin-A4                                                    | ENST00000359751 | 0,590751072 |
| A_21_P0011939  | ENST00000431244  | XLOC_I2_008151 |                                                              | ENST00000431244 | 0,590650377 |
| A_33_P3392330  | ENST00000372875  | COQ4           | coenzyme Q4 homolog ( <i>S. cerevisiae</i> )                 | ENST00000372875 | 0,590502698 |
| A_21_P0000220  | NR_000020        | SNORD33        | small nucleolar RNA, C/D box 33                              | ENST00000476268 | 0,590472299 |



|                |                 |             |                                                          |                 |             |
|----------------|-----------------|-------------|----------------------------------------------------------|-----------------|-------------|
| A_33_P3210338  | NM_022841       | RFX7        | regulatory factor X, 7                                   | ENST00000423270 | 0,59022458  |
| A_23_P109254   | NM_184234       | RBM39       | RNA binding motif protein 39                             | ENST00000465158 | 0,590171518 |
| A_19_P00322900 | NR_003491       | MIAT        |                                                          |                 | 0,590141593 |
| A_21_P0000240  | NR_002435       | SNORD100    | small nucleolar RNA, C/D box 100                         |                 | 0,590129018 |
| A_33_P3709173  | NM_001127360    | PHTF2       | putative homeodomain transcription factor 2              | ENST00000415251 | 0,590066577 |
| A_21_P0005492  | THC2525265      | XLOC_006416 |                                                          |                 | 0,589822369 |
| A_23_P55388    | NM_018143       | KLHL11      | kelch-like 11 (Drosophila)                               | ENST00000540254 | 0,589699734 |
| A_21_P0000041  | NM_001164390    | RAPGEF6     | Rap guanine nucleotide exchange factor (GEF) 6           | ENST00000510071 | 0,589678408 |
| A_33_P3365408  | NR_026947       | MATL2963    | uncharacterized LOC283314                                | ENST00000541775 | 0,589564432 |
| A_23_P114057   | NM_017789       | SEMA4C      | sema domain, immunoglobulin domain (Ig), transmembran    | ENST00000467747 | 0,589436945 |
| A_23_P63432    | NM_017821       | RHBDL2      | rhomboid, veinlet-like 2 (Drosophila)                    | ENST00000372985 | 0,589379451 |
| A_24_P152398   | NM_001195195    | TP53AIP1    | tumor protein p53 regulated apoptosis inducing protein 1 | ENST00000530777 | 0,589207689 |
| A_23_P212497   | NM_032169       | ACAD11      | acyl-CoA dehydrogenase family, member 11                 | ENST00000485198 | 0,589202499 |
| A_23_P128940   | NM_024558       | METTL21D    | methyltransferase like 21D                               | ENST00000484763 | 0,589071902 |
| A_33_P3352632  | AK096262        | LOC728147   | uncharacterized LOC728147                                |                 | 0,589062619 |
| A_23_P60962    | NM_139021       | MAPK15      | mitogen-activated protein kinase 15                      | ENST00000533830 | 0,589062175 |
| A_33_P3246028  | NM_001099434    | DCDC2B      | doublecortin domain containing 2B                        | ENST00000409358 | 0,589048822 |
| A_32_P71788    | NM_002014       | FKBP4       | FK506 binding protein 4, 59kDa                           | ENST00000543037 | 0,588723207 |
| A_23_P416813   | NM_133466       | ZFP82       | zinc finger protein 82 homolog (mouse)                   | ENST00000392161 | 0,588650816 |
| A_33_P3278220  | ENST00000373544 | RABEPK      | Rab9 effector protein with kelch motifs                  | ENST00000373544 | 0,588289728 |
| A_33_P3410251  | ENST00000281753 | UNC80       | unc-80 homolog (C. elegans)                              | ENST00000281753 | 0,588275098 |
| A_23_P126836   | NM_003326       | TNFSF4      | tumor necrosis factor (ligand) superfamily, member 4     | ENST00000281834 | 0,588267735 |
| A_33_P3365815  | AK057458        | LOC729866   | hCG1994895                                               |                 | 0,588116087 |
| A_23_P108342   | NM_016536       | ZNF571      | zinc finger protein 571                                  | ENST00000358744 | 0,588020632 |
| A_24_P223384   | NM_003513       | HIST1H2AB   | histone cluster 1, H2ab                                  | ENST00000259791 | 0,587886436 |
| A_33_P3290085  | NM_032164       | ZNF394      | zinc finger protein 394                                  | ENST00000337673 | 0,587865231 |
| A_21_P0000234  | NR_001457       | SNORD38B    | small nucleolar RNA, C/D box 38B                         | ENST00000484599 | 0,587749169 |
| A_32_P221958   | NM_001077685    | AGAP7       | ArfGAP with GTPase domain, ankyrin repeat and PH domair  | ENST00000413193 | 0,587736843 |
| A_23_P252748   | NM_007152       | ZNF195      | zinc finger protein 195                                  | ENST00000526601 | 0,587634353 |

|               |                  |                |                                                                              |                 |             |
|---------------|------------------|----------------|------------------------------------------------------------------------------|-----------------|-------------|
| A_33_P3326447 | XM_003119544     | LOC100508384   | uncharacterized LOC100508384                                                 |                 | 0,587609677 |
| A_23_P114084  | NM_000444        | PHEX           | phosphate regulating endopeptidase homolog, X-linked                         | ENST00000537599 | 0,587590357 |
| A_33_P3220818 | NM_001201338     | SAFB           | scaffold attachment factor B                                                 | ENST00000433404 | 0,587527747 |
| A_23_P103276  | NM_138417        | KTI12          | KTI12 homolog, chromatin associated ( <i>S. cerevisiae</i> )                 | ENST00000371614 | 0,587395592 |
| A_23_P323166  | NM_016333        | SRRM2          | serine/arginine repetitive matrix 2                                          | ENST00000301740 | 0,587379345 |
| A_23_P111132  | NM_005345        | HSPA1A         | heat shock 70kDa protein 1A                                                  | ENST00000375651 | 0,586942137 |
| A_21_P0013166 | ENST00000510017  | XLOC_I2_013242 |                                                                              | ENST00000510017 | 0,586873914 |
| A_33_P3257528 | NM_015555        | ZNF451         | zinc finger protein 451                                                      | ENST00000477046 | 0,586822975 |
| A_33_P3279640 | NM_001194        | HCN2           | hyperpolarization activated cyclic nucleotide-gated potassium channel 2      | ENST00000251287 | 0,586580337 |
| A_32_P113508  | NM_030803        | ATG16L1        | ATG16 autophagy related 16-like 1 ( <i>S. cerevisiae</i> )                   | ENST00000474148 | 0,586514183 |
| A_33_P3233050 | AK124895         | SAMM50         | sorting and assembly machinery component 50 homolog ( <i>S. cerevisiae</i> ) |                 | 0,586378552 |
| A_33_P3254695 | NR_004404        | RNU105A        | RNA, U105A small nucleolar                                                   | ENST00000437681 | 0,586370186 |
| A_33_P3375435 | NM_133447        | AGAP11         | ankyrin repeat and GTPase domain Arf GTPase activating protein 11            | ENST00000453174 | 0,586275333 |
| A_24_P71439   | NM_015317        | PUM2           | pumilio homolog 2 ( <i>Drosophila</i> )                                      | ENST00000403432 | 0,586234238 |
| A_21_P0011133 | NM_199254        | TPTE2          | transmembrane phosphoinositide 3-phosphatase and tensin homolog 2            | ENST00000440905 | 0,586051174 |
| A_21_P0005078 | TCONS_00012818   | XLOC_005900    |                                                                              |                 | 0,586043134 |
| A_33_P3290354 | NM_032532        | FNDC1          | fibronectin type III domain containing 1                                     | ENST00000340366 | 0,586006703 |
| A_33_P3382856 | NM_133507        | DCN            | decorin                                                                      | ENST00000456569 | 0,585938105 |
| A_23_P122464  | NM_006299        | ZNF193         | zinc finger protein 193                                                      | ENST00000252207 | 0,585851271 |
| A_21_P0011581 | TCONS_I2_0001114 | XLOC_I2_006026 |                                                                              |                 | 0,585783087 |
| A_33_P3415345 | NM_001135745     | ALS2           | amyotrophic lateral sclerosis 2 (juvenile)                                   | ENST00000496244 | 0,585686841 |
| A_21_P0002200 | TCONS_00003640   | XLOC_001430    |                                                                              |                 | 0,585646379 |
| A_33_P3382944 | NM_198537        | YJEFN3         | YjeF N-terminal domain containing 3                                          | ENST00000397179 | 0,585466737 |
| A_23_P74914   | NM_014777        | URB2           | URB2 ribosome biogenesis 2 homolog ( <i>S. cerevisiae</i> )                  | ENST00000258243 | 0,585421009 |
| A_33_P3221203 | NM_002427        | MMP13          | matrix metalloproteinase 13 (collagenase 3)                                  | ENST00000260302 | 0,585219685 |
| A_23_P109254  | NM_184234        | RBM39          | RNA binding motif protein 39                                                 | ENST00000465158 | 0,585049167 |
| A_21_P0006478 | TCONS_00017125   | XLOC_007918    |                                                                              |                 | 0,584896209 |
| A_21_P0004598 | BX647715         | XLOC_005299    |                                                                              |                 | 0,584873846 |
| A_33_P3310047 | NM_020717        | SHROOM4        | shroom family member 4                                                       | ENST00000289292 | 0,584856366 |

|                |                  |                |                                                              |                 |             |
|----------------|------------------|----------------|--------------------------------------------------------------|-----------------|-------------|
| A_24_P410516   | NM_198181        | GOLGA6L9       | golgin A6 family-like 9                                      | ENST00000306827 | 0,584832132 |
| A_33_P3313411  | NM_001172630     | ARHGAP33       | Rho GTPase activating protein 33                             | ENST00000007510 | 0,584818998 |
| A_21_P0014222  | XR_108911        | LOC100505501   | uncharacterized LOC100505501                                 |                 | 0,584716886 |
| A_21_P0008494  | TCONS_00022884   | XLOC_011138    |                                                              |                 | 0,584509287 |
| A_23_P328206   | NM_015221        | DNMBP          | dynamamin binding protein                                    | ENST00000342239 | 0,584503227 |
| A_21_P0007938  | ENST00000435843  | XLOC_010389    |                                                              | ENST00000435843 | 0,58447259  |
| A_19_P00318280 | XR_108813        | LOC100506860   |                                                              |                 | 0,584425961 |
| A_33_P3367939  | NM_182973        | TMPRSS9        | transmembrane protease, serine 9                             | ENST00000332578 | 0,584385212 |
| A_33_P3411315  | NM_033185        | KRTAP3-3       | keratin associated protein 3-3                               | ENST00000391586 | 0,584342188 |
| A_23_P314811   | NM_152679        | SLC10A4        | solute carrier family 10 (sodium/bile acid cotransporter fam | ENST00000273861 | 0,58432098  |
| A_23_P252748   | NM_007152        | ZNF195         | zinc finger protein 195                                      | ENST00000526601 | 0,584162663 |
| A_23_P121120   | NM_023915        | GPR87          | G protein-coupled receptor 87                                | ENST00000260843 | 0,584147645 |
| A_23_P115861   | NM_145312        | ZNF485         | zinc finger protein 485                                      | ENST00000374437 | 0,584100816 |
| A_23_P118392   | NM_016084        | RASD1          | RAS, dexamethasone-induced 1                                 | ENST00000225688 | 0,584029585 |
| A_21_P0003858  | TCONS_00008929   | XLOC_003772    |                                                              |                 | 0,584000628 |
| A_33_P3342295  | NM_199425        | VSX1           | visual system homeobox 1                                     | ENST00000398332 | 0,583970025 |
| A_21_P0011937  | TCONS_l2_0001471 | XLOC_l2_008140 |                                                              |                 | 0,583962017 |
| A_23_P97250    | NM_001037533     | GON4L          | gon-4-like (C. elegans)                                      | ENST00000368331 | 0,583911476 |
| A_23_P252748   | NM_007152        | ZNF195         | zinc finger protein 195                                      | ENST00000526601 | 0,583881148 |
| A_21_P0000682  | NR_037642        | LOC100527964   | uncharacterized LOC100527964                                 | ENST00000415414 | 0,583834635 |
| A_23_P111132   | NM_005345        | HSPA1A         | heat shock 70kDa protein 1A                                  | ENST00000375651 | 0,583769125 |
| A_33_P3362249  | XR_132538        | LOC100288292   | putative uncharacterized protein FLJ44672-like               |                 | 0,583512918 |
| A_23_P320242   | NM_152748        | KIAA1324L      | KIAA1324-like                                                | ENST00000394714 | 0,583471904 |
| A_33_P3865368  | BC021569         | LOC254896      | uncharacterized LOC254896                                    | ENST00000397703 | 0,583344029 |
| A_33_P3319542  | NM_015063        | SLC8A2         | solute carrier family 8 (sodium/calcium exchanger), membe    | ENST00000391903 | 0,583248007 |
| A_24_P290927   | NM_014847        | UBAP2L         | ubiquitin associated protein 2-like                          | ENST00000441890 | 0,582934236 |
| A_23_P108404   | NM_001037131     | AGAP1          | ArfGAP with GTPase domain, ankyrin repeat and PH domair      | ENST00000304032 | 0,582779215 |
| A_23_P146198   | NM_000780        | CYP7A1         | cytochrome P450, family 7, subfamily A, polypeptide 1        | ENST00000301645 | 0,582686082 |
| A_23_P2922     | NM_016586        | MBIP           | MAP3K12 binding inhibitory protein 1                         | ENST00000318473 | 0,582631397 |

|                |                 |              |                                                                 |                 |             |
|----------------|-----------------|--------------|-----------------------------------------------------------------|-----------------|-------------|
| A_19_P00805006 | NR_002819       | MALAT1       |                                                                 |                 | 0,582596111 |
| A_24_P22079    | NM_002015       | FOXO1        | forkhead box O1                                                 | ENST00000379561 | 0,582581499 |
| A_33_P3293432  | NM_199340       | LRRC37A3     | leucine rich repeat containing 37, member A3                    | ENST00000319651 | 0,582560849 |
| A_21_P0005118  | THC2679903      | XLOC_005361  |                                                                 |                 | 0,582550644 |
| A_21_P0014070  | ENST00000444037 | LOC100506855 |                                                                 | ENST00000444037 | 0,582511771 |
| A_33_P3223990  | NM_152263       | TPM3         | tropomyosin 3                                                   |                 | 0,582498041 |
| A_21_P0000669  | NM_024580       | EFTUD1       | elongation factor Tu GTP binding domain containing 1            | ENST00000268206 | 0,582448554 |
| A_23_P357985   | NM_001037866    | RGPD6        | RANBP2-like and GRIP domain containing 6                        | ENST00000272454 | 0,582416451 |
| A_21_P0003290  | TCONS_00007198  | XLOC_003181  |                                                                 |                 | 0,582354698 |
| A_24_P338992   | NM_025083       | EDC3         | enhancer of mRNA decapping 3 homolog ( <i>S. cerevisiae</i> )   | ENST00000426797 | 0,582284102 |
| A_33_P3394234  | NM_003434       | ZNF133       | zinc finger protein 133                                         | ENST00000402618 | 0,582211417 |
| A_33_P3313929  | NM_031409       | CCR6         | chemokine (C-C motif) receptor 6                                | ENST00000349984 | 0,582101463 |
| A_33_P3385870  | NM_004354       | CCNG2        | cyclin G2                                                       | ENST00000316355 | 0,582035327 |
| A_33_P3329419  | NM_004408       | DNM1         | dynamamin 1                                                     | ENST00000475805 | 0,58163523  |
| A_21_P0009721  | TCONS_00027012  | XLOC_013057  |                                                                 |                 | 0,581582077 |
| A_24_P281801   | NM_001137608    | ZNF732       | zinc finger protein 732                                         | ENST00000419098 | 0,581395618 |
| A_23_P13033    | NM_002896       | RBM4         | RNA binding motif protein 4                                     | ENST00000408993 | 0,581180264 |
| A_23_P11968    | NM_033553       | GUCA2A       | guanylate cyclase activator 2A (guanylin)                       | ENST00000357001 | 0,581151982 |
| A_21_P0000217  | NR_000017       | SNORD36B     | small nucleolar RNA, C/D box 36B                                | ENST00000485706 | 0,581032379 |
| A_21_P0004834  | TCONS_00011688  | XLOC_005164  |                                                                 |                 | 0,581018935 |
| A_33_P3274069  | NM_012265       | RHBDD3       | rhomboid domain containing 3                                    | ENST00000216085 | 0,580931133 |
| A_33_P3380772  | NM_080625       | C20orf160    | chromosome 20 open reading frame 160                            | ENST00000339619 | 0,580925406 |
| A_21_P0010239  | ENST00000422473 | XLOC_013931  |                                                                 | ENST00000422473 | 0,580742392 |
| A_21_P0000083  | NM_004366       | CLCN2        | chloride channel 2                                              | ENST00000430397 | 0,580358411 |
| A_23_P111132   | NM_005345       | HSPA1A       | heat shock 70kDa protein 1A                                     | ENST00000375651 | 0,580351977 |
| A_33_P3227944  | NR_026906       | C17orf69     | chromosome 17 open reading frame 69                             |                 | 0,580341407 |
| A_21_P0011611  | NM_173628       | DNAH17       | dynein, axonemal, heavy chain 17                                | ENST00000389840 | 0,580336247 |
| A_23_P107963   | NM_000148       | FUT1         | fucosyltransferase 1 (galactoside 2-alpha-L-fucosyltransferase) | ENST00000310160 | 0,580221886 |
| A_23_P122464   | NM_006299       | ZNF193       | zinc finger protein 193                                         | ENST00000252207 | 0,580217385 |

|                |                 |              |                                                               |                 |             |
|----------------|-----------------|--------------|---------------------------------------------------------------|-----------------|-------------|
| A_23_P111132   | NM_005345       | HSPA1A       | heat shock 70kDa protein 1A                                   | ENST00000375651 | 0,580184101 |
| A_21_P0000379  | NR_003056       | SNORD67      | small nucleolar RNA, C/D box 67                               |                 | 0,580065476 |
| A_24_P366122   | NM_024722       | ACBD4        | acyl-CoA binding domain containing 4                          | ENST00000376955 | 0,580045508 |
| A_21_P0000025  | NM_001160109    | NOS3         | nitric oxide synthase 3 (endothelial cell)                    | ENST00000460603 | 0,579840468 |
| A_23_P122464   | NM_006299       | ZNF193       | zinc finger protein 193                                       | ENST00000252207 | 0,579822642 |
| A_23_P27133    | NM_002275       | KRT15        | keratin 15                                                    | ENST00000474031 | 0,579652583 |
| A_33_P3441583  | BM453041        | SRGAP2P1     | SLIT-ROBO Rho GTPase activating protein 2 pseudogene 1        |                 | 0,579593188 |
| A_21_P0002468  | TCONS_00004321  | XLOC_002186  |                                                               |                 | 0,579568536 |
| A_23_P5912     | NM_017798       | YTHDF1       | YTH domain family, member 1                                   | ENST00000370339 | 0,579482046 |
| A_23_P111054   | NM_021062       | HIST1H2BB    | histone cluster 1, H2bb                                       | ENST00000357905 | 0,579286437 |
| A_21_P0006767  | ENST00000451946 | XLOC_008838  |                                                               | ENST00000451946 | 0,579206125 |
| A_21_P0002461  | TCONS_00004313  | XLOC_002168  |                                                               |                 | 0,579123317 |
| A_19_P00803334 | TCONS_00019576  | XLOC_009375  |                                                               |                 | 0,579089579 |
| A_23_P301340   | NM_144679       | C17orf56     | chromosome 17 open reading frame 56                           | ENST00000374769 | 0,579071225 |
| A_21_P0011454  | XM_001716361    | LOC388210    | apolipoporphorins-like                                        |                 | 0,579060241 |
| A_19_P00325336 | XR_109771       | LOC100506774 | uncharacterized LOC100506774                                  |                 | 0,578962533 |
| A_24_P332857   | NM_173571       | CT47A11      | cancer/testis antigen family 47, member A11                   | ENST00000371280 | 0,578757165 |
| A_23_P114057   | NM_017789       | SEMA4C       | sema domain, immunoglobulin domain (Ig), transmembran         | ENST00000467747 | 0,578742672 |
| A_23_P67424    | NM_153257       | ZNF461       | zinc finger protein 461                                       | ENST00000396892 | 0,578671417 |
| A_33_P3246293  | NM_001145207    | HBS1L        | HBS1-like ( <i>S. cerevisiae</i> )                            | ENST00000367822 | 0,57863742  |
| A_33_P3312504  | NM_012455       | PSD4         | pleckstrin and Sec7 domain containing 4                       | ENST00000409656 | 0,578595272 |
| A_33_P3261927  | NM_213603       | ZNF789       | zinc finger protein 789                                       | ENST00000331410 | 0,578581373 |
| A_23_P118392   | NM_016084       | RASD1        | RAS, dexamethasone-induced 1                                  | ENST00000225688 | 0,578515675 |
| A_24_P370096   | NM_006300       | ZNF230       | zinc finger protein 230                                       | ENST00000429154 | 0,578475463 |
| A_32_P4595     | NM_000337       | SGCD         | sarcoglycan, delta (35kDa dystrophin-associated glycoprote    | ENST00000435422 | 0,578455206 |
| A_21_P0003114  | XR_110050       | LOC100506301 | uncharacterized LOC100506301                                  | ENST00000416124 | 0,578364589 |
| A_33_P3342992  | NR_004847       | UBE2Q2P2     | ubiquitin-conjugating enzyme E2Q family member 2 pseudogene 2 |                 | 0,578222527 |
| A_21_P0011384  | NR_003661       | UBE2Q2P1     | ubiquitin-conjugating enzyme E2Q family member 2 pseudoc      | ENST00000339094 | 0,57819009  |
| A_33_P3299599  | NM_001166175    | NKX2-5       | NK2 homeobox 5                                                | ENST00000329198 | 0,5781845   |



|               |                 |                |                                                         |                 |             |
|---------------|-----------------|----------------|---------------------------------------------------------|-----------------|-------------|
| A_23_P167997  | NM_003518       | HIST1H2BG      | histone cluster 1, H2bg                                 | ENST00000244601 | 0,578137357 |
| A_33_P3250740 | NM_001017930    | DCAF8L1        | DDB1 and CUL4 associated factor 8-like 1                | ENST00000441525 | 0,577991627 |
| A_23_P59677   | NM_021930       | RINT1          | RAD50 interactor 1                                      | ENST00000497979 | 0,577926647 |
| A_21_P0002374 | TCONS_00004060  | XLOC_001908    |                                                         |                 | 0,577924326 |
| A_23_P108404  | NM_001037131    | AGAP1          | ArfGAP with GTPase domain, ankyrin repeat and PH domain | ENST00000304032 | 0,577818568 |
| A_33_P3274194 | NM_001035003    | KCNIP4         | Kv channel interacting protein 4                        | ENST00000382148 | 0,577746505 |
| A_33_P3253747 | NM_000761       | CYP1A2         | cytochrome P450, family 1, subfamily A, polypeptide 2   | ENST00000343932 | 0,577705711 |
| A_23_P22647   | NM_015686       | FAM155B        | family with sequence similarity 155, member B           | ENST00000252338 | 0,577583808 |
| A_33_P3303176 | NM_001164377    | MRGPRG         | MAS-related GPR, member G                               | ENST00000332314 | 0,577218757 |
| A_24_P119201  | NM_015832       | MBD2           | methyl-CpG binding domain protein 2                     | ENST00000398398 | 0,577204683 |
| A_32_P360193  | NM_144666       | DNHD1          | dynein heavy chain domain 1                             | ENST00000532027 | 0,577029324 |
| A_23_P6836    | NM_016291       | IP6K2          | inositol hexakisphosphate kinase 2                      | ENST00000491686 | 0,576775716 |
| A_24_P384569  | NM_001163287    | EWSR1          | Ewing sarcoma breakpoint region 1                       | ENST00000483415 | 0,576733095 |
| A_23_P67952   | NR_026766       | MYCNOS         | MYCN opposite strand/antisense RNA (non-protein coding) |                 | 0,576668173 |
| A_33_P3387756 | NM_001007125    | C20orf201      | chromosome 20 open reading frame 201                    | ENST00000308906 | 0,576527971 |
| A_33_P3651948 | NM_002499       | NEO1           | neogenin 1                                              | ENST00000261908 | 0,576186217 |
| A_24_P182122  | ENST00000361390 | ND1            | NADH dehydrogenase, subunit 1 (complex I)               | ENST00000361390 | 0,576160721 |
| A_23_P206792  | NM_033410       | ZNF764         | zinc finger protein 764                                 | ENST00000395091 | 0,575984643 |
| A_24_P586390  | NR_028327       | LOC100133331   | uncharacterized LOC100133331                            | ENST00000440038 | 0,575868806 |
| A_24_P117942  | NM_207377       | TOMM20L        | translocase of outer mitochondrial membrane 20 homolog  | ENST00000557754 | 0,575808901 |
| A_24_P267664  | NR_026543       | C21orf88       | chromosome 21 open reading frame 88                     | ENST00000380604 | 0,575766575 |
| A_21_P0006799 | ENST00000446713 | XLOC_008981    |                                                         | ENST00000446713 | 0,575762073 |
| A_33_P3415744 | NM_025190       | ANKRD36B       | ankyrin repeat domain 36B                               | ENST00000357042 | 0,575645771 |
| A_23_P94879   | NM_000506       | F2             | coagulation factor II (thrombin)                        | ENST00000311907 | 0,575547502 |
| A_21_P0010686 | ENST00000412115 | XLOC_l2_000010 |                                                         | ENST00000412115 | 0,575485639 |
| A_23_P111132  | NM_005345       | HSPA1A         | heat shock 70kDa protein 1A                             | ENST00000375651 | 0,575474741 |
| A_33_P3295423 | NM_001040653    | ZXDC           | ZXD family zinc finger C                                |                 | 0,575460062 |
| A_23_P76823   | NM_199165       | ADSSL1         | adenylosuccinate synthase like 1                        | ENST00000557582 | 0,575297545 |
| A_23_P110606  | NM_014757       | MAML1          | mastermind-like 1 (Drosophila)                          | ENST00000292599 | 0,57525181  |

|               |                 |              |                                                     |                 |             |
|---------------|-----------------|--------------|-----------------------------------------------------|-----------------|-------------|
| A_21_P0005262 | ENST00000420268 | XLOC_006260  |                                                     | ENST00000420268 | 0,574962136 |
| A_21_P0000460 | NR_003685       | SNORD121A    | small nucleolar RNA, C/D box 121A                   |                 | 0,574943077 |
| A_33_P3285868 | NM_134268       | CYGB         | cytoglobin                                          | ENST00000293230 | 0,574918891 |
| A_23_P122464  | NM_006299       | ZNF193       | zinc finger protein 193                             | ENST00000252207 | 0,574831054 |
| A_24_P583040  | ENST00000397861 | C17orf67     | chromosome 17 open reading frame 67                 | ENST00000397861 | 0,574695663 |
| A_23_P116890  | NM_006249       | PRB3         | proline-rich protein BstNI subfamily 3              | ENST00000538488 | 0,574607478 |
| A_21_P0003286 | TCONS_00007181  | XLOC_003149  |                                                     |                 | 0,574493071 |
| A_23_P111132  | NM_005345       | HSPA1A       | heat shock 70kDa protein 1A                         | ENST00000375651 | 0,574321174 |
| A_23_P252748  | NM_007152       | ZNF195       | zinc finger protein 195                             | ENST00000526601 | 0,574260711 |
| A_23_P39050   | NM_001080493    | ZNF823       | zinc finger protein 823                             | ENST00000341191 | 0,574234822 |
| A_21_P0004469 | TCONS_00010555  | XLOC_005082  |                                                     |                 | 0,574066872 |
| A_21_P0012461 | AK096589        | RPL32P3      | ribosomal protein L32 pseudogene 3                  |                 | 0,573957193 |
| A_21_P0009615 | TCONS_00026648  | XLOC_012725  |                                                     |                 | 0,573883995 |
| A_33_P3385567 | ENST00000472842 | ARNTL        | aryl hydrocarbon receptor nuclear translocator-like | ENST00000472842 | 0,573793381 |
| A_23_P500998  | NM_152739       | HOXA9        | homeobox A9                                         | ENST00000242050 | 0,573792038 |
| A_33_P3403937 | AK124011        | LOC100129399 | uncharacterized LOC100129399                        |                 | 0,573758992 |
| A_33_P3299796 | ENST00000536349 | MAN1B1       | mannosidase, alpha, class 1B, member 1              | ENST00000536349 | 0,573736537 |
| A_33_P3349774 | NM_144703       | LSM14B       | LSM14B, SCD6 homolog B (S. cerevisiae)              | ENST00000370906 | 0,573707213 |
| A_24_P384397  | NM_133452       | RAVER1       | ribonucleoprotein, PTB-binding 1                    | ENST00000331131 | 0,573676036 |
| A_33_P3523501 | XR_109585       | LOC374890    | uncharacterized LOC374890                           |                 | 0,573634626 |
| A_33_P3276376 | ENST00000367915 | HSD17B7      | hydroxysteroid (17-beta) dehydrogenase 7            | ENST00000367915 | 0,573589969 |
| A_21_P0014338 | XR_109341       | LOC100506183 | uncharacterized LOC100506183                        |                 | 0,573549204 |
| A_23_P111604  | NM_152745       | NXPH1        | neurexophilin 1                                     | ENST00000405863 | 0,573466497 |
| A_21_P0004703 | ENST00000446476 | XLOC_005530  |                                                     | ENST00000446476 | 0,573371277 |
| A_21_P0007235 | TCONS_00019383  | XLOC_009207  |                                                     |                 | 0,573331017 |
| A_21_P0006611 | BC037918        | XLOC_008349  |                                                     |                 | 0,573169812 |
| A_23_P111132  | NM_005345       | HSPA1A       | heat shock 70kDa protein 1A                         | ENST00000375651 | 0,573152807 |
| A_33_P3290945 | NM_017952       | PTCD3        | Pentatricopeptide repeat domain 3                   | ENST00000465560 | 0,573017871 |
| A_24_P152468  | XM_001718823    | LOC100134663 | uncharacterized LOC100134663                        |                 | 0,572771283 |

|               |                  |                |                                                               |                 |             |
|---------------|------------------|----------------|---------------------------------------------------------------|-----------------|-------------|
| A_33_P3265429 | NR_038450        | LOC100130849   | phosphorylase kinase, gamma 1 (muscle) pseudogene             | ENST00000448242 | 0,572598902 |
| A_33_P3335984 | BC132927         | FLJ39653       | uncharacterized FLJ39653                                      |                 | 0,572536831 |
| A_23_P429535  | NM_012086        | GTF3C3         | general transcription factor IIIC, polypeptide 3, 102kDa      | ENST00000263956 | 0,57243835  |
| A_23_P111132  | NM_005345        | HSPA1A         | heat shock 70kDa protein 1A                                   | ENST00000375651 | 0,572405437 |
| A_33_P3359518 | NM_001085487     | MYSM1          | Myb-like, SWIRM and MPN domains 1                             | ENST00000401044 | 0,572236781 |
| A_21_P0005271 | AI198554         | XLOC_006314    |                                                               |                 | 0,572174792 |
| A_23_P108342  | NM_016536        | ZNF571         | zinc finger protein 571                                       | ENST00000358744 | 0,57204844  |
| A_23_P402287  | NM_153371        | LN2            | ligand of numb-protein X 2                                    | ENST00000316334 | 0,571814593 |
| A_24_P926400  | NM_001001561     | GGA1           | golgi-associated, gamma adaptin ear containing, ARF binding   | ENST00000414350 | 0,571726718 |
| A_23_P252748  | NM_007152        | ZNF195         | zinc finger protein 195                                       | ENST00000526601 | 0,571675771 |
| A_23_P149419  | NM_022078        | GPATCH3        | G patch domain containing 3                                   | ENST00000536641 | 0,57156025  |
| A_23_P28042   | NM_001159293     | ZNF737         | zinc finger protein 737                                       | ENST00000427401 | 0,571529761 |
| A_21_P0013085 | TCONS_I2_0002480 | XLOC_I2_013031 |                                                               |                 | 0,5715093   |
| A_33_P3379486 | AK127427         | LOC100130581   | uncharacterized LOC100130581                                  |                 | 0,571439228 |
| A_33_P3721983 | XR_110526        | MGC13053       | uncharacterized MGC13053                                      | ENST00000532619 | 0,571435407 |
| A_21_P0000108 | NM_001190702     | MTRNR2L8       | MT-RNR2-like 8                                                | ENST00000536684 | 0,571424127 |
| A_23_P110606  | NM_014757        | MAML1          | mastermind-like 1 (Drosophila)                                | ENST00000292599 | 0,571345677 |
| A_33_P3364038 | NM_001145805     | IRGM           | immunity-related GTPase family, M                             | ENST00000522154 | 0,571271967 |
| A_33_P3322050 | NM_130438        | DYRK1A         | dual-specificity tyrosine-(Y)-phosphorylation regulated kina: | ENST00000321219 | 0,571006331 |
| A_21_P0009389 | TCONS_00025894   | XLOC_012171    |                                                               |                 | 0,570878045 |
| A_23_P17275   | NM_016544        | DNAJC27        | DnaJ (Hsp40) homolog, subfamily C, member 27                  | ENST00000380809 | 0,570848982 |
| A_21_P0013535 | AL390183         | FAM66D         | family with sequence similarity 66, member D                  |                 | 0,570802637 |
| A_21_P0009591 | TCONS_00026578   | XLOC_012895    |                                                               |                 | 0,570788077 |
| A_23_P109072  | NM_020436        | SALL4          | sal-like 4 (Drosophila)                                       | ENST00000371539 | 0,570751776 |
| A_21_P0002178 | TCONS_00003588   | XLOC_001372    |                                                               |                 | 0,570749799 |
| A_33_P3234197 | NM_025188        | TRIM45         | tripartite motif containing 45                                | ENST00000256649 | 0,570702003 |
| A_21_P0000226 | NR_001276        | SNORD56B       | small nucleolar RNA, C/D box 56B                              |                 | 0,570653327 |
| A_21_P0003636 | TCONS_00008197   | XLOC_003649    |                                                               |                 | 0,570611485 |
| A_33_P3238997 | NM_001135187     | AGFG1          | ArfGAP with FG repeats 1                                      |                 | 0,570312125 |

|               |                  |                |                                                              |                 |             |
|---------------|------------------|----------------|--------------------------------------------------------------|-----------------|-------------|
| A_33_P3406998 | NM_130438        | DYRK1A         | dual-specificity tyrosine-(Y)-phosphorylation regulated kina | ENST00000462274 | 0,570261233 |
| A_21_P0001255 | TCONS_00000807   | XLOC_000022    |                                                              |                 | 0,570204587 |
| A_33_P3411388 | NM_001080461     | UNCX           | UNC homeobox                                                 | ENST00000316333 | 0,569563589 |
| A_33_P3328659 | NM_014246        | CELSR1         | cadherin, EGF LAG seven-pass G-type receptor 1 (flamingo l   | ENST00000262738 | 0,569431166 |
| A_21_P0011602 | NM_032582        | USP32          | ubiquitin specific peptidase 32                              | ENST00000300896 | 0,569378877 |
| A_23_P108342  | NM_016536        | ZNF571         | zinc finger protein 571                                      | ENST00000358744 | 0,569363508 |
| A_24_P135427  | NR_036508        | LOC100128398   | uncharacterized LOC100128398                                 | ENST00000313957 | 0,569362389 |
| A_23_P126844  | NM_148965        | TNFRSF25       | tumor necrosis factor receptor superfamily, member 25        | ENST00000513135 | 0,569284877 |
| A_23_P168276  | NM_004865        | TBPL1          | TBP-like 1                                                   | ENST00000237264 | 0,569052749 |
| A_23_P144369  | NM_153757        | NAP1L5         | nucleosome assembly protein 1-like 5                         | ENST00000539293 | 0,568762638 |
| A_23_P352684  | NM_003861        | DCAF5          | DDB1 and CUL4 associated factor 5                            | ENST00000341516 | 0,568695476 |
| A_33_P3228872 | NM_014472        | C10orf28       | chromosome 10 open reading frame 28                          | ENST00000314594 | 0,568531103 |
| A_33_P3210583 | NM_014911        | AAK1           | AP2 associated kinase 1                                      | ENST00000409085 | 0,568517199 |
| A_23_P6561    | NM_018029        | EBLN2          | endogenous Bornavirus-like nucleoprotein 2                   | ENST00000533473 | 0,568381449 |
| A_21_P0011768 | ENST00000360204  | XLOC_I2_006648 |                                                              | ENST00000360204 | 0,568316992 |
| A_24_P128145  | NM_001880        | ATF2           | activating transcription factor 2                            | ENST00000435231 | 0,568300046 |
| A_21_P0011580 | TCONS_I2_0001114 | XLOC_I2_006025 |                                                              |                 | 0,568294669 |
| A_21_P0003137 | NM_001190470     | MTRNR2L2       | MT-RNR2-like 2                                               | ENST00000536684 | 0,568255174 |
| A_21_P0003050 | TCONS_00006285   | XLOC_002890    |                                                              |                 | 0,568196661 |
| A_21_P0012381 | TCONS_I2_0001869 | XLOC_I2_009790 |                                                              |                 | 0,568164271 |
| A_23_P111303  | NM_014892        | SCAF8          | SR-related CTD-associated factor 8                           | ENST00000417268 | 0,568077792 |
| A_23_P80062   | NM_003185        | TAF4           | TAF4 RNA polymerase II, TATA box binding protein (TBP)-as    | ENST00000252996 | 0,568033465 |
| A_33_P3287685 | NM_014516        | CNOT3          | CCR4-NOT transcription complex, subunit 3                    | ENST00000482247 | 0,568004817 |
| A_23_P114057  | NM_017789        | SEMA4C         | sema domain, immunoglobulin domain (Ig), transmembran        | ENST00000467747 | 0,567892782 |
| A_23_P47077   | NM_004281        | BAG3           | BCL2-associated athanogene 3                                 | ENST00000369085 | 0,567884072 |
| A_21_P0013676 | NM_001244752     | ANKRD18B       | ankyrin repeat domain 18B                                    | ENST00000354752 | 0,567872548 |
| A_21_P0005219 | ENST00000442800  | XLOC_006035    |                                                              | ENST00000442800 | 0,567857108 |
| A_21_P0011372 | NR_040058        | LOC100505648   | uncharacterized LOC100505648                                 |                 | 0,567820042 |
| A_21_P0001708 | TCONS_00002202   | XLOC_000495    |                                                              |                 | 0,567532689 |

|               |                 |                |                                                                  |                 |             |
|---------------|-----------------|----------------|------------------------------------------------------------------|-----------------|-------------|
| A_21_P0000707 | NM_152644       | FAM24B         | family with sequence similarity 24, member B                     | ENST00000368896 | 0,567505793 |
| A_33_P3263284 | NR_024563       | LOC100130238   | uncharacterized LOC100130238                                     |                 | 0,567366084 |
| A_23_P111303  | NM_014892       | SCAF8          | SR-related CTD-associated factor 8                               | ENST00000417268 | 0,567190032 |
| A_23_P406928  | ENST00000361567 | ND5            | NADH dehydrogenase, subunit 5 (complex I)                        | ENST00000361567 | 0,567112793 |
| A_33_P3306654 | NR_024480       | LOC100131551   | uncharacterized LOC100131551                                     | ENST00000414120 | 0,567095795 |
| A_33_P3217804 | ENST00000493088 | CAMSAP1        | calmodulin regulated spectrin-associated protein 1               | ENST00000493088 | 0,567028218 |
| A_24_P146211  | NM_021063       | HIST1H2BD      | histone cluster 1, H2bd                                          | ENST00000377777 | 0,567017197 |
| A_33_P3262083 | NR_015384       | LOC100126784   | uncharacterized LOC100126784                                     |                 | 0,566836204 |
| A_23_P215435  | ENST00000395270 | POM121         | POM121 membrane glycoprotein                                     | ENST00000395270 | 0,566753269 |
| A_23_P111132  | NM_005345       | HSPA1A         | heat shock 70kDa protein 1A                                      | ENST00000375651 | 0,566734163 |
| A_21_P0010702 | ENST00000454285 | XLOC_I2_000192 |                                                                  | ENST00000454285 | 0,566690147 |
| A_23_P44760   | NM_014159       | SETD2          | SET domain containing 2                                          | ENST00000409792 | 0,566663697 |
| A_23_P305033  | NM_152787       | TAB3           | TGF-beta activated kinase 1/MAP3K7 binding protein 3             | ENST00000288422 | 0,566649147 |
| A_33_P3299140 | ENST00000372089 | GTF3C5         | general transcription factor IIIC, polypeptide 5, 63kDa          | ENST00000372089 | 0,566574724 |
| A_23_P101476  | NM_030824       | ZNF442         | zinc finger protein 442                                          | ENST00000242804 | 0,566400309 |
| A_23_P337875  | NM_001040202    | PAQR3          | progesterone and adipoQ receptor family member III               | ENST00000508599 | 0,56606764  |
| A_33_P3300941 | AF156973        | NPCDR1         | nasopharyngeal carcinoma, down-regulated 1                       |                 | 0,566031408 |
| A_21_P0005573 | TCONS_00014191  | XLOC_006200    |                                                                  |                 | 0,566029236 |
| A_23_P13359   | NM_006362       | NXF1           | nuclear RNA export factor 1                                      | ENST00000533048 | 0,56595595  |
| A_33_P3271445 | NM_001130105    | COL4A3BP       | collagen, type IV, alpha 3 (Goodpasture antigen) binding protein | ENST00000357457 | 0,565816122 |
| A_23_P26294   | NM_012467       | TPSG1          | tryptase gamma 1                                                 | ENST00000234798 | 0,565785348 |
| A_33_P3318646 | NM_015722       | CALY           | calcyon neuron-specific vesicular protein                        | ENST00000467611 | 0,565775858 |
| A_23_P431853  | ENST00000361453 | ND2            | MTND2                                                            | ENST00000361453 | 0,565724865 |
| A_23_P331770  | NM_018561       | USP49          | ubiquitin specific peptidase 49                                  | ENST00000297229 | 0,565710907 |
| A_23_P218463  | NM_013376       | SERTAD1        | SERTA domain containing 1                                        | ENST00000357949 | 0,565586576 |
| A_21_P0011363 | BC070492        | XLOC_I2_004866 |                                                                  |                 | 0,56536192  |
| A_33_P3743508 | NR_033838       | LOC158435      | uncharacterized LOC158435                                        | ENST00000432783 | 0,565360404 |
| A_33_P3518572 | NR_040245       | LOC100287314   | uncharacterized LOC100287314                                     | ENST00000547804 | 0,565291301 |
| A_23_P319565  | NM_170753       | PGBD3          | piggyBac transposable element derived 3                          | ENST00000508005 | 0,565186838 |



|                |                 |              |                                                        |                 |             |
|----------------|-----------------|--------------|--------------------------------------------------------|-----------------|-------------|
| A_23_P74344    | NM_053053       | TADA1        | transcriptional adaptor 1                              | ENST00000467021 | 0,56503229  |
| A_19_P00318261 | NR_003016       | SNORA26      |                                                        |                 | 0,564882712 |
| A_23_P102242   | NM_022826       | Mar-07       | membrane-associated ring finger (C3HC4) 7              | ENST00000409175 | 0,564826889 |
| A_33_P3732466  | AL359570        | DKFZp547G183 | uncharacterized LOC55525                               |                 | 0,564577543 |
| A_33_P3336198  | NM_182563       | C16orf79     | chromosome 16 open reading frame 79                    | ENST00000328540 | 0,564553322 |
| A_23_P136347   | NM_004447       | EPS8         | epidermal growth factor receptor pathway substrate 8   | ENST00000543612 | 0,564547993 |
| A_33_P3355408  | NR_038406       | LOC100128126 | uncharacterized LOC100128126                           | ENST00000517604 | 0,564530569 |
| A_24_P382287   | NM_004361       | CDH7         | cadherin 7, type 2                                     | ENST00000397968 | 0,564529479 |
| A_33_P3327290  | NM_001029955    | DCAF4L1      | DDB1 and CUL4 associated factor 4-like 1               | ENST00000333141 | 0,564403041 |
| A_33_P3424267  | NM_001083601    | NAA60        | N(alpha)-acetyltransferase 60, NatF catalytic subunit  | ENST00000360862 | 0,56434612  |
| A_24_P218074   | NM_207336       | ZNF467       | zinc finger protein 467                                | ENST00000302017 | 0,564236428 |
| A_33_P3413808  | NM_001124756    | PABPC1L      | poly(A) binding protein, cytoplasmic 1-like            | ENST00000217074 | 0,564109882 |
| A_21_P0002025  | ENST00000420130 | XLOC_002001  |                                                        | ENST00000420130 | 0,564042707 |
| A_21_P0000668  | NR_036636       | ADAM1        | ADAM metallopeptidase domain 1, pseudogene             |                 | 0,563884382 |
| A_23_P156807   | NM_001202519    | CFLAR        | CASP8 and FADD-like apoptosis regulator                | ENST00000412930 | 0,563853069 |
| A_32_P207428   | NM_138374       | ZNF845       | zinc finger protein 845                                | ENST00000427984 | 0,563820734 |
| A_19_P00316415 | AK090966        | Q8LKN9       |                                                        |                 | 0,563790382 |
| A_23_P137896   | NM_022120       | OXCT2        | 3-oxoacid CoA transferase 2                            | ENST00000542949 | 0,563552027 |
| A_33_P3402474  | NM_001031722    | ATAT1        | alpha tubulin acetyltransferase 1                      | ENST00000376478 | 0,563423129 |
| A_32_P36143    | XR_112950       | LOC729088    | uncharacterized LOC729088                              |                 | 0,563395786 |
| A_23_P111132   | NM_005345       | HSPA1A       | heat shock 70kDa protein 1A                            | ENST00000375651 | 0,563385041 |
| A_21_P0004418  | TCONS_00010392  | XLOC_004908  |                                                        |                 | 0,563187753 |
| A_23_P114057   | NM_017789       | SEMA4C       | sema domain, immunoglobulin domain (Ig), transmembrane | ENST00000467747 | 0,56300232  |
| A_23_P333129   | NM_001177376    | DUX4L4       | double homeobox 4 like 4                               | ENST00000538692 | 0,562948597 |
| A_33_P3284019  | NM_001012426    | FOXP4        | forkhead box P4                                        | ENST00000373057 | 0,562946983 |
| A_23_P372144   | NM_021231       | C19orf29     | chromosome 19 open reading frame 29                    | ENST00000221899 | 0,562813727 |
| A_33_P3414107  | XR_108595       | LOC729040    | uncharacterized LOC729040                              | ENST00000440769 | 0,562727732 |
| A_33_P3334419  | NM_031464       | RPS6KL1      | ribosomal protein S6 kinase-like 1                     | ENST00000556776 | 0,562690417 |
| A_24_P706314   | NM_194247       | HNRNPA3      | heterogeneous nuclear ribonucleoprotein A3             |                 | 0,562592555 |

|               |                  |                |                                                          |                 |             |
|---------------|------------------|----------------|----------------------------------------------------------|-----------------|-------------|
| A_33_P3335030 | NM_001164315     | ANKRD36        | ankyrin repeat domain 36                                 | ENST00000295246 | 0,562589518 |
| A_24_P65060   | NM_032246        | MEX3B          | mex-3 homolog B (C. elegans)                             | ENST00000329713 | 0,562493176 |
| A_21_P0010577 | TCONS_I2_0000084 | XLOC_I2_000641 |                                                          |                 | 0,562446457 |
| A_21_P0000918 | BC062745         | XLOC_000393    |                                                          |                 | 0,562381935 |
| A_21_P0002495 | TCONS_00004415   | XLOC_002287    |                                                          |                 | 0,562268898 |
| A_21_P0012222 | BC036580         | C21orf81       | ankyrin repeat domain 20 family, member A3 pseudogene    |                 | 0,562255206 |
| A_33_P3264444 | ENST00000482292  | PFDN6          | prefoldin subunit 6                                      | ENST00000482292 | 0,562193394 |
| A_33_P3238651 | NM_001039783     | TXNRD3NB       | thioredoxin reductase 3 neighbor                         | ENST00000404489 | 0,562079922 |
| A_33_P3209581 | NM_001170738     | IQSEC3         | IQ motif and Sec7 domain 3                               | ENST00000326261 | 0,561977969 |
| A_23_P145501  | NM_004830        | MED23          | mediator complex subunit 23                              | ENST00000545957 | 0,561855329 |
| A_33_P3245922 | NM_006724        | MAP3K4         | mitogen-activated protein kinase kinase kinase 4         | ENST00000544209 | 0,561787745 |
| A_23_P375524  | NM_178352        | LCE1D          | late cornified envelope 1D                               | ENST00000326233 | 0,561755113 |
| A_21_P0008647 | NR_026979        | LOC145837      | uncharacterized LOC145837                                |                 | 0,561567311 |
| A_23_P24796   | NM_032127        | FAM160A2       | family with sequence similarity 160, member A2           | ENST00000265978 | 0,561561378 |
| A_21_P0009797 | TCONS_00027642   | XLOC_013181    |                                                          |                 | 0,56142756  |
| A_23_P345707  | NM_152259        | C15orf42       | chromosome 15 open reading frame 42                      | ENST00000268138 | 0,561301675 |
| A_21_P0000215 | NR_000015        | SNORD55        | small nucleolar RNA, C/D box 55                          | ENST00000485390 | 0,561220051 |
| A_21_P0014604 | XR_110494        | LOC100506528   | uncharacterized LOC100506528                             |                 | 0,561097854 |
| A_23_P255805  | NM_003416        | ZNF7           | zinc finger protein 7                                    | ENST00000528017 | 0,560948524 |
| A_33_P3382147 | ENST00000487412  | STARD13        | StAR-related lipid transfer (START) domain containing 13 | ENST00000487412 | 0,560656939 |
| A_23_P132515  | NM_017699        | SIDT1          | SID1 transmembrane family, member 1                      | ENST00000393830 | 0,560611774 |
| A_21_P0004341 | ENST00000521585  | HMP19          | HMP19 protein                                            | ENST00000521585 | 0,560416783 |
| A_23_P75790   | NM_013279        | C11orf9        | chromosome 11 open reading frame 9                       | ENST00000265460 | 0,560295751 |
| A_33_P3335845 | NM_001006622     | WDR33          | WD repeat domain 33                                      | ENST00000409658 | 0,56022438  |
| A_21_P0006032 | TCONS_00015719   | XLOC_007466    |                                                          |                 | 0,560049821 |
| A_23_P346421  | NM_018181        | ZNF532         | zinc finger protein 532                                  | ENST00000336078 | 0,560034291 |
| A_21_P0012183 | NR_040113        | ANKRD20A5P     | ankyrin repeat domain 20 family, member A5, pseudogene   | ENST00000432875 | 0,560005351 |
| A_24_P72646   | NR_027715        | FLJ14107       | uncharacterized LOC80094                                 |                 | 0,559873805 |
| A_33_P3221718 | AK127907         | LOC100129373   | uncharacterized LOC100129373                             |                 | 0,559677153 |

|               |                 |                |                                                                           |                 |             |
|---------------|-----------------|----------------|---------------------------------------------------------------------------|-----------------|-------------|
| A_21_P0000109 | ENST00000544932 | MTRNR2L9       |                                                                           | ENST00000544932 | 0,559580451 |
| A_33_P3214586 | NM_057090       | ARTN           | artemin                                                                   | ENST00000372354 | 0,559522888 |
| A_23_P103276  | NM_138417       | KTI12          | KTI12 homolog, chromatin associated (S. cerevisiae)                       | ENST00000371614 | 0,55949034  |
| A_21_P0005255 | ENST00000446053 | XLOC_006220    |                                                                           | ENST00000446053 | 0,559403371 |
| A_23_P107963  | NM_000148       | FUT1           | fucosyltransferase 1 (galactoside 2-alpha-L-fucosyltransferase)           | ENST00000310160 | 0,559293247 |
| A_23_P111303  | NM_014892       | SCAF8          | SR-related CTD-associated factor 8                                        | ENST00000417268 | 0,559282342 |
| A_32_P46840   | AK090664        | LOC729680      | uncharacterized LOC729680                                                 |                 | 0,559015426 |
| A_23_P54100   | NM_001437       | ESR2           | estrogen receptor 2 (ER beta)                                             | ENST00000357782 | 0,55899079  |
| A_23_P52531   | NM_152644       | FAM24B         | family with sequence similarity 24, member B                              | ENST00000368896 | 0,558880088 |
| A_21_P0000336 | NR_002982       | SNORA54        | small nucleolar RNA, H/ACA box 54                                         |                 | 0,558779129 |
| A_33_P3474175 | BU601128        | SFTA1P         | surfactant associated 1, pseudogene                                       |                 | 0,558696929 |
| A_21_P0009216 | TCONS_00025294  | XLOC_012099    |                                                                           |                 | 0,558596828 |
| A_33_P3283669 | NM_152296       | ATP1A3         | ATPase, Na <sup>+</sup> /K <sup>+</sup> transporting, alpha 3 polypeptide | ENST00000545399 | 0,558535457 |
| A_21_P0009928 | DA407032        | XLOC_013437    |                                                                           |                 | 0,558407492 |
| A_21_P0001174 | ENST00000445662 | XLOC_000995    |                                                                           | ENST00000445662 | 0,558332188 |
| A_21_P0011606 | THC2511873      | XLOC_I2_006166 |                                                                           |                 | 0,558269776 |
| A_33_P3346866 | NM_017822       | KANSL2         | KAT8 regulatory NSL complex subunit 2                                     | ENST00000420613 | 0,558256132 |
| A_21_P0002976 | TCONS_00006093  | XLOC_002702    |                                                                           |                 | 0,558216115 |
| A_23_P122464  | NM_006299       | ZNF193         | zinc finger protein 193                                                   | ENST00000252207 | 0,558128277 |
| A_33_P3280066 | NM_012232       | PTRF           | polymerase I and transcript release factor                                | ENST00000357684 | 0,558029975 |
| A_23_P107247  | NM_018896       | CACNA1G        | calcium channel, voltage-dependent, T type, alpha 1G subunit              | ENST00000360761 | 0,557888884 |
| A_33_P3326904 | AK125166        | LOC441268      | uncharacterized LOC441268                                                 |                 | 0,557872082 |
| A_21_P0014687 | NM_000296       | PKD1           | polycystic kidney disease 1 (autosomal dominant)                          | ENST00000439623 | 0,557834159 |
| A_23_P401014  | NM_005744       | ARIH1          | ariadne homolog, ubiquitin-conjugating enzyme E2 binding                  | ENST00000299305 | 0,557777359 |
| A_21_P0011538 | THC2569535      | XLOC_I2_005731 |                                                                           |                 | 0,557756859 |
| A_23_P99996   | NM_019066       | MAGEL2         | MAGE-like 2                                                               | ENST00000532292 | 0,557697024 |
| A_24_P382630  | NM_015666       | GTPBP5         | GTP binding protein 5 (putative)                                          | ENST00000370823 | 0,55764844  |
| A_24_P92952   | NM_006015       | ARID1A         | AT rich interactive domain 1A (SWI-like)                                  | ENST00000532781 | 0,557606165 |
| A_23_P429998  | NM_006732       | FOSB           | FBJ murine osteosarcoma viral oncogene homolog B                          | ENST00000353609 | 0,557516956 |

|                |                 |             |                                                              |                 |             |
|----------------|-----------------|-------------|--------------------------------------------------------------|-----------------|-------------|
| A_24_P923945   | ENST00000375218 | UBR4        | ubiquitin protein ligase E3 component n-recognin 4           | ENST00000375218 | 0,557502855 |
| A_33_P3281613  | AK123276        | KCNT1       | potassium channel, subfamily T, member 1                     |                 | 0,557447303 |
| A_23_P214168   | NM_004370       | COL12A1     | collagen, type XII, alpha 1                                  | ENST00000322507 | 0,557438149 |
| A_33_P3320010  | NM_006089       | SCML2       | sex comb on midleg-like 2 (Drosophila)                       | ENST00000491988 | 0,557417222 |
| A_24_P389285   | NR_027330       | C7orf54     | chromosome 7 open reading frame 54                           | ENST00000467238 | 0,557350385 |
| A_33_P3358893  | NM_002762       | PRM2        | protamine 2                                                  | ENST00000241808 | 0,557139736 |
| A_33_P3394993  | NM_025170       | PREX2       | phosphatidylinositol-3,4,5-trisphosphate-dependent Rac ex    | ENST00000354677 | 0,557061126 |
| A_33_P3321678  | ENST00000381081 | RNF180      | ring finger protein 180                                      | ENST00000381081 | 0,55704439  |
| A_21_P0002956  | TCONS_00006009  | XLOC_002636 |                                                              |                 | 0,556958173 |
| A_19_P00317731 | ENST00000432413 | XLOC_002473 |                                                              | ENST00000432413 | 0,55683697  |
| A_23_P373031   | NM_000719       | CACNA1C     | calcium channel, voltage-dependent, L type, alpha 1C subur   | ENST00000399634 | 0,556781929 |
| A_33_P3371663  | NM_002344       | LTK         | leukocyte receptor tyrosine kinase                           | ENST00000263800 | 0,556737751 |
| A_23_P352619   | NM_052864       | TIFA        | TRAF-interacting protein with forkhead-associated domain     | ENST00000438746 | 0,556707837 |
| A_23_P104413   | NM_033178       | DUX4        | double homeobox 4                                            | ENST00000440426 | 0,556685217 |
| A_23_P107963   | NM_000148       | FUT1        | fucosyltransferase 1 (galactoside 2-alpha-L-fucosyltransfera | ENST00000310160 | 0,556548912 |
| A_23_P121945   | NM_001001502    | SNCB        | synuclein, beta                                              | ENST00000393693 | 0,556354998 |
| A_33_P3343750  | NM_152603       | ZNF567      | zinc finger protein 567                                      | ENST00000392163 | 0,55628732  |
| A_24_P686965   | NM_001103161    | SH2D5       | SH2 domain containing 5                                      | ENST00000375031 | 0,556194567 |
| A_19_P00320434 | AK027541        | XLOC_001728 | 0                                                            |                 | 0,555885841 |
| A_23_P423695   | NM_006454       | MXD4        | MAX dimerization protein 4                                   | ENST00000537353 | 0,555881547 |
| A_19_P00322809 | XM_370934       | LOC388210   | apolipoporphorins-like                                       |                 | 0,555846124 |
| A_23_P24044    | NM_017649       | CNNM2       | cyclin M2                                                    | ENST00000433628 | 0,55584195  |
| A_32_P230196   | NM_001077685    | AGAP7       | ArfGAP with GTPase domain, ankyrin repeat and PH domair      | ENST00000413193 | 0,555795707 |
| A_33_P3279715  | NM_152896       | UHRF2       | ubiquitin-like with PHD and ring finger domains 2            | ENST00000381373 | 0,555140812 |
| A_23_P114057   | NM_017789       | SEMA4C      | sema domain, immunoglobulin domain (Ig), transmembran        | ENST00000467747 | 0,554955264 |
| A_33_P3305620  | NM_001184717    | TIPARP      | TCDD-inducible poly(ADP-ribose) polymerase                   | ENST00000461166 | 0,554921699 |
| A_21_P0000253  | NR_002559       | SNORD29     | small nucleolar RNA, C/D box 29                              |                 | 0,554891119 |
| A_23_P78053    | NM_030802       | FAM117A     | family with sequence similarity 117, member A                | ENST00000240364 | 0,554825341 |
| A_23_P115861   | NM_145312       | ZNF485      | zinc finger protein 485                                      | ENST00000374437 | 0,554733557 |

|               |                  |                |                                                                               |                 |             |
|---------------|------------------|----------------|-------------------------------------------------------------------------------|-----------------|-------------|
| A_33_P3228757 | NM_001144989     | ZNF814         | zinc finger protein 814                                                       | ENST00000376205 | 0,554709878 |
| A_24_P162373  | NM_001206998     | ZNRF3          | zinc and ring finger 3                                                        | ENST00000402174 | 0,554411974 |
| A_21_P0011398 | BC035099         | WHAMMP2        | WAS protein homolog associated with actin, golgi membranes and microtubules p |                 | 0,554400711 |
| A_24_P419028  | AB014771         | MOP-1          | MOP-1                                                                         |                 | 0,554358805 |
| A_21_P0011623 | ENST00000506394  | XLOC_I2_005826 |                                                                               | ENST00000506394 | 0,554342561 |
| A_23_P106737  | NM_201412        | LUC7L          | LUC7-like ( <i>S. cerevisiae</i> )                                            | ENST00000418978 | 0,554318183 |
| A_21_P0003243 | THC2496390       | XLOC_002730    |                                                                               |                 | 0,55429977  |
| A_23_P111303  | NM_014892        | SCAF8          | SR-related CTD-associated factor 8                                            | ENST00000417268 | 0,554244056 |
| A_24_P261750  | NM_007035        | KERA           | keratocan                                                                     | ENST00000266719 | 0,554000803 |
| A_33_P3406066 | NM_173632        | ZNF776         | zinc finger protein 776                                                       | ENST00000317178 | 0,553896141 |
| A_21_P0012698 | TCONS_I2_0002145 | XLOC_I2_011399 |                                                                               |                 | 0,553890428 |
| A_33_P3240727 | NM_001080470     | ZNF697         | zinc finger protein 697                                                       | ENST00000421812 | 0,553885734 |
| A_33_P3410206 | NM_004913        | C16orf7        | chromosome 16 open reading frame 7                                            | ENST00000261625 | 0,553817749 |
| A_21_P0009924 | ENST00000456634  | XLOC_013840    |                                                                               | ENST00000456634 | 0,553817596 |
| A_32_P195647  | NM_030624        | KLHL15         | kelch-like 15 ( <i>Drosophila</i> )                                           | ENST00000328046 | 0,5536891   |
| A_33_P3388148 | NM_001166694     | CHRNA3         | cholinergic receptor, nicotinic, alpha 3                                      | ENST00000326858 | 0,553619454 |
| A_23_P256663  | NM_003614        | GALR3          | galanin receptor 3                                                            | ENST00000249041 | 0,553615782 |
| A_33_P3279019 | NM_012397        | SERPINB13      | serpin peptidase inhibitor, clade B (ovalbumin), member 13                    | ENST00000269489 | 0,553602148 |
| A_21_P0000259 | NR_002565        | SNORD25        | small nucleolar RNA, C/D box 25                                               |                 | 0,553453441 |
| A_23_P20732   | NM_012204        | GTF3C4         | general transcription factor IIIC, polypeptide 4, 90kDa                       | ENST00000372146 | 0,55325094  |
| A_33_P3365392 | AK127261         | LOC401557      | uncharacterized LOC401557                                                     |                 | 0,553232798 |
| A_23_P108932  | NR_002229        | RPL23AP32      | ribosomal protein L23a pseudogene 32                                          |                 | 0,553128058 |
| A_23_P114057  | NM_017789        | SEMA4C         | sema domain, immunoglobulin domain (Ig), transmembran                         | ENST00000467747 | 0,553103273 |
| A_23_P93629   | NM_015905        | TRIM24         | tripartite motif containing 24                                                | ENST00000415680 | 0,553016944 |
| A_23_P108342  | NM_016536        | ZNF571         | zinc finger protein 571                                                       | ENST00000358744 | 0,55290931  |
| A_33_P3356886 | NM_198459        | DENND2C        | DENN/MADD domain containing 2C                                                | ENST00000369540 | 0,552826879 |
| A_33_P3279871 | XM_001726878     | LOC400682      | zinc finger protein 100-like                                                  |                 | 0,552789896 |
| A_23_P106737  | NM_201412        | LUC7L          | LUC7-like ( <i>S. cerevisiae</i> )                                            | ENST00000418978 | 0,552749476 |
| A_32_P41375   | NR_024368        | FLJ45340       | uncharacterized LOC402483                                                     |                 | 0,552450507 |



|               |                 |              |                                                           |                 |             |
|---------------|-----------------|--------------|-----------------------------------------------------------|-----------------|-------------|
| A_23_P114405  | NM_012286       | MORF4L2      | mortality factor 4 like 2                                 | ENST00000423833 | 0,552331116 |
| A_23_P340019  | NM_178844       | NLRC3        | NLR family, CARD domain containing 3                      | ENST00000419350 | 0,552167687 |
| A_33_P3416206 | AF258580        | ARHGAP17     | Rho GTPase activating protein 17                          |                 | 0,552050392 |
| A_21_P0002391 | TCONS_00004114  | XLOC_001964  |                                                           |                 | 0,552007976 |
| A_33_P3242483 | NM_001030055    | ARHGAP5      | Rho GTPase activating protein 5                           | ENST00000345122 | 0,551818412 |
| A_23_P405707  | ENST00000501455 | BCOR         | BCL6 corepressor                                          | ENST00000501455 | 0,551804645 |
| A_23_P106737  | NM_201412       | LUC7L        | LUC7-like (S. cerevisiae)                                 | ENST00000418978 | 0,551757668 |
| A_23_P108342  | NM_016536       | ZNF571       | zinc finger protein 571                                   | ENST00000358744 | 0,551543105 |
| A_23_P106737  | NM_201412       | LUC7L        | LUC7-like (S. cerevisiae)                                 | ENST00000418978 | 0,551496829 |
| A_23_P52826   | NM_032725       | BUD13        | BUD13 homolog (S. cerevisiae)                             | ENST00000260210 | 0,551492571 |
| A_23_P373799  | NM_020943       | CWC22        | CWC22 spliceosome-associated protein homolog (S. cerevis) | ENST00000295749 | 0,551428682 |
| A_33_P3361584 | AK126579        | LOC100130930 | uncharacterized LOC100130930                              |                 | 0,551256411 |
| A_33_P3327842 | NM_001077195    | ZNF436       | zinc finger protein 436                                   | ENST00000374608 | 0,551234637 |
| A_33_P3330666 | AK094096        | FLJ36777     | uncharacterized LOC730971                                 |                 | 0,551224208 |
| A_33_P3357062 | NM_020936       | DDX55        | DEAD (Asp-Glu-Ala-Asp) box polypeptide 55                 | ENST00000354291 | 0,551132281 |
| A_33_P3218760 | NM_080599       | UPF2         | UPF2 regulator of nonsense transcripts homolog (yeast)    | ENST00000397053 | 0,551106057 |
| A_33_P3258602 | NM_001005566    | OR5B2        | olfactory receptor, family 5, subfamily B, member 2       | ENST00000302581 | 0,551011774 |
| A_23_P5586    | NM_005791       | MPHOSPH10    | M-phase phosphoprotein 10 (U3 small nucleolar ribonucleo  | ENST00000476969 | 0,550994193 |
| A_23_P106737  | NM_201412       | LUC7L        | LUC7-like (S. cerevisiae)                                 | ENST00000418978 | 0,550948004 |
| A_33_P3362727 | ENST00000376256 | HNRNPK       | heterogeneous nuclear ribonucleoprotein K                 | ENST00000376256 | 0,550811285 |
| A_33_P3384710 | NM_018182       | C17orf63     | chromosome 17 open reading frame 63                       | ENST00000341217 | 0,550750537 |
| A_24_P348083  | XR_111773       | C18orf23     | chromosome 18 open reading frame 23                       |                 | 0,550735967 |
| A_24_P50908   | ENST00000366699 | TRIM11       | tripartite motif containing 11                            | ENST00000366699 | 0,550617716 |
| A_33_P3328445 | AK074580        | LOC100506713 | uncharacterized LOC100506713                              | ENST00000399540 | 0,550592033 |
| A_33_P3326285 | NR_002578       | GAS5         | growth arrest-specific 5 (non-protein coding)             |                 | 0,550533737 |
| A_24_P205036  | NM_001001411    | ZNF676       | zinc finger protein 676                                   | ENST00000397121 | 0,550511349 |
| A_33_P3229067 | NM_003520       | HIST1H2BN    | histone cluster 1, H2bn                                   | ENST00000396980 | 0,550291414 |
| A_23_P114057  | NM_017789       | SEMA4C       | sema domain, immunoglobulin domain (Ig), transmembran     | ENST00000467747 | 0,550232009 |
| A_21_P0004805 | ENST00000445442 | XLOC_005929  |                                                           | ENST00000445442 | 0,550142257 |

|                |                 |                |                                                             |                 |             |
|----------------|-----------------|----------------|-------------------------------------------------------------|-----------------|-------------|
| A_21_P0011299  | THC2554687      | XLOC_I2_004595 |                                                             |                 | 0,550054351 |
| A_21_P0002514  | BI765130        | XLOC_002360    |                                                             |                 | 0,549959377 |
| A_23_P132845   | NM_004366       | CLCN2          | chloride channel 2                                          | ENST00000430397 | 0,549882341 |
| A_23_P9152     | NM_005772       | RCL1           | RNA terminal phosphate cyclase-like 1                       | ENST00000381750 | 0,549852227 |
| A_23_P140328   | NM_004713       | NEMF           | nuclear export mediator factor                              | ENST00000556925 | 0,549815299 |
| A_23_P101623   | NM_022103       | ZNF667         | zinc finger protein 667                                     | ENST00000360227 | 0,54959982  |
| A_23_P111303   | NM_014892       | SCAF8          | SR-related CTD-associated factor 8                          | ENST00000417268 | 0,54951949  |
| A_23_P99405    | NM_003453       | ZMYM2          | zinc finger, MYM-type 2                                     | ENST00000382871 | 0,549493403 |
| A_23_P122464   | NM_006299       | ZNF193         | zinc finger protein 193                                     | ENST00000252207 | 0,54921786  |
| A_23_P16538    | NM_006532       | ELL            | elongation factor RNA polymerase II                         | ENST00000262809 | 0,549213465 |
| A_21_P0000117  | NM_001193281    | MID1           | midline 1 (Opitz/BBB syndrome)                              |                 | 0,549196246 |
| A_23_P110606   | NM_014757       | MAML1          | mastermind-like 1 (Drosophila)                              | ENST00000292599 | 0,549026416 |
| A_33_P3339575  | AK126828        | LOC647983      | uncharacterized LOC647983                                   |                 | 0,549005119 |
| A_33_P3704280  | AK095428        | FLJ38109       | uncharacterized LOC386627                                   |                 | 0,548846325 |
| A_33_P3283213  | NR_027295       | MGC57346       | uncharacterized LOC401884                                   | ENST00000455565 | 0,54881292  |
| A_33_P3321507  | NM_001080495    | TNRC18         | trinucleotide repeat containing 18                          | ENST00000430969 | 0,548684916 |
| A_21_P0011938  | NM_025190       | ANKRD36B       | ankyrin repeat domain 36B                                   | ENST00000528268 | 0,548624808 |
| A_21_P0014799  | XR_132602       | LOC100652876   | uncharacterized LOC100652876                                |                 | 0,548603883 |
| A_33_P3653888  | AF274944        | LOC100128185   | PNAS-19                                                     |                 | 0,548468256 |
| A_21_P0005813  | THC2715664      | XLOC_007038    |                                                             |                 | 0,548365298 |
| A_33_P3299921  | XM_001719518    | LOC100128869   | uncharacterized LOC100128869                                |                 | 0,548345394 |
| A_23_P408094   | NM_002357       | MXD1           | MAX dimerization protein 1                                  | ENST00000410000 | 0,548295381 |
| A_21_P0009617  | NR_015417       | LOC284276      | uncharacterized LOC284276                                   |                 | 0,548164783 |
| A_21_P0001983  | ENST00000446029 | XLOC_001919    |                                                             | ENST00000446029 | 0,547928136 |
| A_19_P00315524 | NR_003491       | MIAT           |                                                             |                 | 0,547864959 |
| A_33_P3361398  | ENST00000382477 | C19orf26       | chromosome 19 open reading frame 26                         | ENST00000382477 | 0,54777886  |
| A_33_P3268910  | ENST00000505319 | SPRY1          | sprouty homolog 1, antagonist of FGF signaling (Drosophila) | ENST00000505319 | 0,547745838 |
| A_21_P0000318  | NR_002963       | SNORA24        | small nucleolar RNA, H/ACA box 24                           |                 | 0,547520344 |
| A_21_P0010401  | TCONS_00029542  | XLOC_014192    |                                                             |                 | 0,547495733 |

|                |                  |                |                                                                              |  |                 |             |
|----------------|------------------|----------------|------------------------------------------------------------------------------|--|-----------------|-------------|
| A_21_P0003847  | TCONS_00008869   | XLOC_003646    |                                                                              |  |                 | 0,547477571 |
| A_33_P3410584  | AK057937         | LOC645586      | uncharacterized LOC645586                                                    |  |                 | 0,547475712 |
| A_33_P3222698  | NM_006991        | ZNF197         | zinc finger protein 197                                                      |  | ENST00000396058 | 0,547475411 |
| A_23_P121250   | NM_001967        | EIF4A2         | eukaryotic translation initiation factor 4A2                                 |  | ENST00000496382 | 0,54746877  |
| A_21_P0013783  | TCONS_I2_0003030 | XLOC_I2_015585 |                                                                              |  |                 | 0,547436418 |
| A_19_P00812151 | NR_024448        | GUSBP11        |                                                                              |  | ENST00000451919 | 0,547392879 |
| A_21_P0011419  | NM_000296        | PKD1           | polycystic kidney disease 1 (autosomal dominant)                             |  | ENST00000545970 | 0,547336986 |
| A_33_P3337415  | NM_002071        | GNAL           | guanine nucleotide binding protein (G protein), alpha activ                  |  | ENST00000269162 | 0,547287457 |
| A_21_P0007687  | ENST00000546259  | XLOC_010012    |                                                                              |  | ENST00000546259 | 0,547259709 |
| A_21_P0009317  | NR_024178        | LOC284100      | tyrosine 3-monooxygenase/tryptophan 5-monooxygenase activation protein, epsi |  |                 | 0,547051604 |
| A_21_P0000219  | NR_000019        | SNORD34        | small nucleolar RNA, C/D box 34                                              |  | ENST00000472481 | 0,54703244  |
| A_23_P111303   | NM_014892        | SCAF8          | SR-related CTD-associated factor 8                                           |  | ENST00000417268 | 0,546997906 |
| A_23_P111865   | NM_145914        | ZSCAN21        | zinc finger and SCAN domain containing 21                                    |  | ENST00000292450 | 0,546980652 |
| A_33_P3244168  | ENST00000426595  | MRPS17         | mitochondrial ribosomal protein S17                                          |  | ENST00000426595 | 0,546965835 |
| A_23_P340890   | NM_001195753     | THAP3          | THAP domain containing, apoptosis associated protein 3                       |  | ENST00000307896 | 0,546732546 |
| A_33_P3393734  | ENST00000392558  | RPS27          | ribosomal protein S27                                                        |  | ENST00000392558 | 0,546537375 |
| A_23_P56922    | NM_002157        | HSPE1          | heat shock 10kDa protein 1 (chaperonin 10)                                   |  | ENST00000465573 | 0,546458691 |
| A_23_P16562    | NM_001017392     | SUGP2          | SURP and G patch domain containing 2                                         |  | ENST00000452918 | 0,546426616 |
| A_21_P0013268  | TCONS_I2_0002619 | XLOC_I2_013594 |                                                                              |  |                 | 0,546373004 |
| A_23_P356565   | NM_015324        | RRP8           | ribosomal RNA processing 8, methyltransferase, homolog (y                    |  | ENST00000526352 | 0,546370351 |
| A_32_P71447    | NM_015261        | NCAPD3         | non-SMC condensin II complex, subunit D3                                     |  | ENST00000534548 | 0,546366069 |
| A_23_P360209   | ENST00000361227  | ND3            | NADH dehydrogenase, subunit 3 (complex I)                                    |  | ENST00000361227 | 0,546342362 |
| A_21_P0014894  | XR_132878        | LOC100652757   | uncharacterized LOC100652757                                                 |  |                 | 0,546188556 |
| A_33_P3255001  | NR_026834        | LOC152024      | uncharacterized LOC152024                                                    |  | ENST00000432505 | 0,546079828 |
| A_33_P3380196  | BC015533         | AKAP9          | A kinase (PRKA) anchor protein (yotiao) 9                                    |  | ENST00000394564 | 0,54605688  |
| A_23_P434890   | NM_014550        | CARD10         | caspase recruitment domain family, member 10                                 |  | ENST00000251973 | 0,546029059 |
| A_33_P3335386  | ENST00000388995  | FAM83G         | family with sequence similarity 83, member G                                 |  | ENST00000388995 | 0,545903363 |
| A_23_P114405   | NM_012286        | MORF4L2        | mortality factor 4 like 2                                                    |  | ENST00000423833 | 0,545880697 |
| A_21_P0014195  | XR_108794        | LOC100506312   | uncharacterized LOC100506312                                                 |  |                 | 0,545859777 |

|                |                 |              |                                                                       |                 |             |
|----------------|-----------------|--------------|-----------------------------------------------------------------------|-----------------|-------------|
| A_23_P142070   | NM_012466       | TSPAN16      | tetraspanin 16                                                        | ENST00000316737 | 0,54583852  |
| A_33_P3609431  | AK127846        | ERVFRD-2     | endogenous retrovirus group FRD, member 2                             |                 | 0,545654468 |
| A_23_P111303   | NM_014892       | SCAF8        | SR-related CTD-associated factor 8                                    | ENST00000417268 | 0,545573085 |
| A_21_P0014110  | ENST00000478301 | LOC100506673 |                                                                       | ENST00000478301 | 0,545551066 |
| A_33_P3359354  | NM_001146310    | C1orf86      | chromosome 1 open reading frame 86                                    | ENST00000400919 | 0,545287217 |
| A_23_P407992   | NM_020825       | CRAMP1L      | Crm, cramped-like (Drosophila)                                        | ENST00000436138 | 0,545087638 |
| A_23_P59138    | NM_002701       | POU5F1       | POU class 5 homeobox 1                                                | ENST00000471529 | 0,545060812 |
| A_33_P3235561  | ENST00000264203 | CAPZB        | capping protein (actin filament) muscle Z-line, beta                  | ENST00000264203 | 0,545016213 |
| A_33_P3230269  | NM_198182       | GRHL1        | grainyhead-like 1 (Drosophila)                                        | ENST00000324907 | 0,544998146 |
| A_33_P3274034  | ENST00000316024 | WRAP53       | WD repeat containing, antisense to TP53                               | ENST00000316024 | 0,544944685 |
| A_21_P0006606  | TCONS_00017647  | XLOC_008323  |                                                                       |                 | 0,544897447 |
| A_24_P307289   | NM_198154       | TMEM95       | transmembrane protein 95                                              | ENST00000389982 | 0,544883026 |
| A_23_P355289   | NR_003226       | AFG3L1P      | AFG3 ATPase family gene 3-like 1 (S. cerevisiae), pseudoger           | ENST00000427658 | 0,544830558 |
| A_33_P3378383  | NR_003260       | DNM1P46      | DNM1 pseudogene 46                                                    | ENST00000341853 | 0,544722571 |
| A_33_P3418668  | NR_022011       | PAR-SN       | paternally expressed transcript PAR-SN                                | ENST00000557108 | 0,544695444 |
| A_19_P00315541 | XR_133032       | LOC100507428 |                                                                       |                 | 0,54452248  |
| A_24_P167877   | NM_001135865    | LOC100132247 | nuclear pore complex interacting protein related gene                 | ENST00000451409 | 0,544235667 |
| A_23_P367071   | NR_024062       | UBE2DNL      | ubiquitin-conjugating enzyme E2D N-terminal like (pseudog             | ENST00000442533 | 0,54422043  |
| A_33_P3409675  | NR_033906       | LOC442132    | golgin A6 family-like 1 pseudogene                                    |                 | 0,544112264 |
| A_32_P113584   | NM_015021       | ZNF292       | zinc finger protein 292                                               | ENST00000369577 | 0,544059267 |
| A_24_P933418   | NM_005759       | ABI2         | abl-interactor 2                                                      | ENST00000295851 | 0,544049611 |
| A_23_P55504    | NM_002551       | OR3A2        | olfactory receptor, family 3, subfamily A, member 2                   | ENST00000408891 | 0,543754061 |
| A_24_P317835   | NM_019892       | INPP5E       | inositol polyphosphate-5-phosphatase, 72 kDa                          | ENST00000371712 | 0,543720539 |
| A_21_P0009137  | CR627169        | XLOC_012041  |                                                                       |                 | 0,543715611 |
| A_33_P3407746  | NM_177968       | PPM1B        | protein phosphatase, Mg <sup>2+</sup> /Mn <sup>2+</sup> dependent, 1B | ENST00000378551 | 0,543496671 |
| A_33_P3281033  | BC035876        | MACROD2      | MACRO domain containing 2                                             | ENST00000407045 | 0,543425091 |
| A_23_P106737   | NM_201412       | LUC7L        | LUC7-like (S. cerevisiae)                                             | ENST00000418978 | 0,543403941 |
| A_21_P0000867  | NR_038993       | ZBTB20-AS1   | ZBTB20 antisense RNA 1 (non-protein coding)                           | ENST00000487814 | 0,54339453  |
| A_21_P0005703  | TCONS_00014724  | XLOC_006814  |                                                                       |                 | 0,543380311 |

|               |                  |                |                                                                              |                 |             |
|---------------|------------------|----------------|------------------------------------------------------------------------------|-----------------|-------------|
| A_21_P0004025 | TCONS_00009445   | XLOC_004456    |                                                                              |                 | 0,543357124 |
| A_33_P3221868 | NM_001173990     | TMEM216        | transmembrane protein 216                                                    | ENST00000334888 | 0,543244445 |
| A_32_P424761  | ENST00000299350  | C12orf28       | chromosome 12 open reading frame 28                                          | ENST00000299350 | 0,542913522 |
| A_23_P66813   | NM_016538        | SIRT7          | sirtuin 7                                                                    | ENST00000536038 | 0,542881344 |
| A_23_P111865  | NM_145914        | ZSCAN21        | zinc finger and SCAN domain containing 21                                    | ENST00000292450 | 0,542865374 |
| A_24_P48318   | NM_017748        | CWC25          | CWC25 spliceosome-associated protein homolog (S. cerevis                     | ENST00000536127 | 0,542864103 |
| A_23_P116168  | NM_032424        | KIAA1826       | KIAA1826                                                                     | ENST00000301919 | 0,542824881 |
| A_33_P3394183 | NM_207395        | ZNF324B        | zinc finger protein 324B                                                     | ENST00000391696 | 0,542622942 |
| A_21_P0011179 | AK091626         | XLOC_I2_003903 |                                                                              |                 | 0,542566622 |
| A_33_P3250165 | NM_020711        | ERMN           | ermin, ERM-like protein                                                      | ENST00000411762 | 0,542528841 |
| A_23_P114405  | NM_012286        | MORF4L2        | mortality factor 4 like 2                                                    | ENST00000423833 | 0,542458644 |
| A_21_P0005167 | BC035191         | XLOC_005737    |                                                                              |                 | 0,542410203 |
| A_23_P359430  | NM_015383        | NBPF14         | neuroblastoma breakpoint family, member 14                                   | ENST00000369368 | 0,542389216 |
| A_33_P3355371 | ENST00000294161  | TTC9C          | tetratricopeptide repeat domain 9C                                           | ENST00000294161 | 0,542364237 |
| A_21_P0009119 | BC035173         | XLOC_011837    |                                                                              |                 | 0,542290303 |
| A_21_P0011300 | TCONS_I2_0000848 | XLOC_I2_004595 |                                                                              |                 | 0,542272905 |
| A_23_P102242  | NM_022826        | Mar-07         | membrane-associated ring finger (C3HC4) 7                                    | ENST00000409175 | 0,542257961 |
| A_21_P0011427 | TCONS_I2_0000967 | XLOC_I2_005179 |                                                                              |                 | 0,542064996 |
| A_33_P3407636 | AK296555         | YWHAE          | tyrosine 3-monooxygenase/tryptophan 5-monooxygenase activation protein, epsi |                 | 0,542056061 |
| A_21_P0002417 | TCONS_00004194   | XLOC_002041    |                                                                              |                 | 0,541908709 |
| A_32_P116556  | NM_001127464     | ZNF469         | zinc finger protein 469                                                      | ENST00000437464 | 0,541860418 |
| A_21_P0012396 | NR_027898        | COL6A4P2       | collagen, type VI, alpha 4 pseudogene 2                                      |                 | 0,541694324 |
| A_33_P3302393 | NM_024731        | KLHL36         | kelch-like 36 (Drosophila)                                                   | ENST00000258157 | 0,541642197 |
| A_24_P303815  | NM_152896        | UHRF2          | ubiquitin-like with PHD and ring finger domains 2                            | ENST00000468435 | 0,541529925 |
| A_23_P92424   | NM_020368        | UTP3           | UTP3, small subunit (SSU) processome component, homolo                       | ENST00000254803 | 0,541518082 |
| A_21_P0000306 | NR_002950        | SNORA2A        | small nucleolar RNA, H/ACA box 2A                                            |                 | 0,541441463 |
| A_33_P3286973 | ENST00000339381  | TAS1R3         | taste receptor, type 1, member 3                                             | ENST00000339381 | 0,541430543 |
| A_33_P3364607 | AK127296         | LOC100130051   | uncharacterized LOC100130051                                                 |                 | 0,541250148 |
| A_23_P116168  | NM_032424        | KIAA1826       | KIAA1826                                                                     | ENST00000301919 | 0,541192546 |



|               |                 |                |                                                                   |                 |             |
|---------------|-----------------|----------------|-------------------------------------------------------------------|-----------------|-------------|
| A_33_P3309319 | NM_145886       | PIDD           | p53-induced death domain protein                                  | ENST00000524486 | 0,541088604 |
| A_33_P3293573 | NM_001077621    | VPS37D         | vacuolar protein sorting 37 homolog D ( <i>S. cerevisiae</i> )    | ENST00000324941 | 0,541041045 |
| A_23_P110957  | NM_001452       | FOXF2          | forkhead box F2                                                   | ENST00000259806 | 0,541040265 |
| A_33_P3354137 | NM_030885       | MAP4           | microtubule-associated protein 4                                  | ENST00000360240 | 0,540857611 |
| A_23_P26358   | NM_015092       | SMG1           | smg-1 homolog, phosphatidylinositol 3-kinase-related kinase       | ENST00000378955 | 0,540840152 |
| A_33_P3384885 | ENST00000359035 | ZNF511         | zinc finger protein 511                                           | ENST00000359035 | 0,540703773 |
| A_23_P367043  | NR_003595       | CDC14C         | CDC14 cell division cycle 14 homolog C ( <i>S. cerevisiae</i> )   |                 | 0,540655533 |
| A_21_P0013437 | AL117552        | XLOC_I2_013874 |                                                                   |                 | 0,540633172 |
| A_33_P3371650 | BC052561        | STK17B         | serine/threonine kinase 17b                                       |                 | 0,540522655 |
| A_32_P171181  | NM_001039703    | NBPF10         | neuroblastoma breakpoint family, member 10                        | ENST00000369372 | 0,54041504  |
| A_24_P97342   | NM_021935       | PROK2          | prokineticin 2                                                    | ENST00000353065 | 0,540397101 |
| A_32_P219279  | NM_052906       | ELFN2          | extracellular leucine-rich repeat and fibronectin type III domain | ENST00000402918 | 0,54037803  |
| A_23_P110606  | NM_014757       | MAML1          | mastermind-like 1 ( <i>Drosophila</i> )                           | ENST00000292599 | 0,540371228 |
| A_21_P0013269 | BC060511        | TLK2           | tousled-like kinase 2                                             |                 | 0,540363127 |
| A_21_P0011500 | NR_033908       | LOC100288069   | general transcription factor Ili pseudogene                       | ENST00000417964 | 0,540287096 |
| A_33_P3353921 | ENST00000489214 | GNLY           | granulysin                                                        | ENST00000489214 | 0,540275471 |
| A_23_P111303  | NM_014892       | SCAF8          | SR-related CTD-associated factor 8                                | ENST00000417268 | 0,540230663 |
| A_23_P333592  | NM_173631       | ZNF547         | zinc finger protein 547                                           | ENST00000282282 | 0,540043929 |
| A_23_P106737  | NM_201412       | LUC7L          | LUC7-like ( <i>S. cerevisiae</i> )                                | ENST00000418978 | 0,54000799  |
| A_23_P55342   | NM_004422       | DVL2           | dishevelled, dsh homolog 2 ( <i>Drosophila</i> )                  | ENST00000005340 | 0,540007507 |
| A_23_P66260   | NM_003414       | ZNF267         | zinc finger protein 267                                           | ENST00000300870 | 0,539831859 |
| A_33_P3228564 | NM_001144875    | DOK3           | docking protein 3                                                 | ENST00000312943 | 0,539796374 |
| A_23_P250813  | NM_000553       | WRN            | Werner syndrome, RecQ helicase-like                               | ENST00000521620 | 0,539687306 |
| A_21_P0005521 | NR_024586       | LOC100216545   | uncharacterized LOC100216545                                      |                 | 0,539537595 |
| A_23_P308632  | NM_152769       | C19orf26       | chromosome 19 open reading frame 26                               | ENST00000215376 | 0,539528638 |
| A_21_P0009329 | TCONS_00025688  | XLOC_012503    |                                                                   |                 | 0,539458944 |
| A_23_P307400  | NM_138363       | CEP95          | centrosomal protein 95kDa                                         | ENST00000556440 | 0,539457298 |
| A_23_P102242  | NM_022826       | Mar-07         | membrane-associated ring finger (C3HC4) 7                         | ENST00000409175 | 0,539455902 |
| A_23_P34676   | NM_198053       | CD247          | CD247 molecule                                                    | ENST00000483825 | 0,539450412 |

|                |                 |                |                                                        |                 |             |
|----------------|-----------------|----------------|--------------------------------------------------------|-----------------|-------------|
| A_21_P0000062  | NM_001166242    | C22orf39       | chromosome 22 open reading frame 39                    | ENST00000542103 | 0,539434893 |
| A_23_P79069    | NM_022904       | RASAL3         | RAS protein activator like 3                           | ENST00000343625 | 0,539356848 |
| A_21_P0010943  | ENST00000440803 | XLOC_I2_001952 |                                                        | ENST00000440803 | 0,539318556 |
| A_23_P102242   | NM_022826       | Mar-07         | membrane-associated ring finger (C3HC4) 7              | ENST00000409175 | 0,539298118 |
| A_21_P0002945  | XM_001130287    | LOC729454      | destrin-like                                           |                 | 0,539273897 |
| A_33_P3264404  | AK098270        | LOC100132593   | uncharacterized LOC100132593                           |                 | 0,539197119 |
| A_21_P0013961  | ENST00000456890 | LOC100506447   | uncharacterized protein LOC100506447                   | ENST00000456890 | 0,539191097 |
| A_21_P0000107  | NM_001190489    | MTRNR2L7       | MT-RNR2-like 7                                         | ENST00000544824 | 0,538870567 |
| A_21_P0009474  | TCONS_00026326  | XLOC_012666    |                                                        |                 | 0,538856706 |
| A_23_P48610    | NM_144568       | TMEM55B        | transmembrane protein 55B                              | ENST00000557041 | 0,538654926 |
| A_23_P150876   | NM_024667       | VPS37B         | vacuolar protein sorting 37 homolog B (S. cerevisiae)  | ENST00000267202 | 0,538653025 |
| A_32_P72341    | NM_173084       | TRIM59         | tripartite motif containing 59                         | ENST00000309784 | 0,538627843 |
| A_33_P3410859  | NR_003288       | LOC729603      | calcium binding protein P22 pseudogene                 |                 | 0,538501379 |
| A_21_P0014323  | XR_109285       | LOC100507092   | uncharacterized LOC100507092                           |                 | 0,538277803 |
| A_21_P0010153  | ENST00000433344 | XLOC_013898    |                                                        | ENST00000433344 | 0,538176472 |
| A_33_P3262020  | NM_000606       | C8G            | complement component 8, gamma polypeptide              | ENST00000224181 | 0,538172163 |
| A_21_P0001446  | TCONS_00001349  | XLOC_000641    |                                                        |                 | 0,538146312 |
| A_33_P3233135  | NM_001199866    | KIF16B         | kinesin family member 16B                              | ENST00000408042 | 0,537834971 |
| A_21_P0000218  | NR_000018       | SNORD35A       | small nucleolar RNA, C/D box 35A                       | ENST00000476268 | 0,537763731 |
| A_21_P0001900  | ENST00000419650 | XLOC_001620    |                                                        | ENST00000419650 | 0,537757622 |
| A_23_P114057   | NM_017789       | SEMA4C         | sema domain, immunoglobulin domain (Ig), transmembrane | ENST00000467747 | 0,537723422 |
| A_21_P0007035  | TCONS_00018646  | XLOC_008997    |                                                        |                 | 0,537691278 |
| A_33_P3352687  | NR_028326       | LOC100133161   | uncharacterized LOC100133161                           | ENST00000450789 | 0,53760018  |
| A_19_P00810043 | XR_108650       | FLJ38717       | FLJ38717 protein                                       |                 | 0,537474687 |
| A_33_P3278033  | NM_001004125    | TUSC1          | tumor suppressor candidate 1                           | ENST00000358022 | 0,537457934 |
| A_23_P126689   | NM_001014443    | USP21          | ubiquitin specific peptidase 21                        | ENST00000485277 | 0,537382949 |
| A_33_P3297468  | NM_001177317    | SLC34A3        | solute carrier family 34 (sodium phosphate), member 3  | ENST00000538474 | 0,537185413 |
| A_33_P3393537  | NM_001164722    | PTAFR          | platelet-activating factor receptor                    | ENST00000539896 | 0,53710001  |
| A_24_P265856   | NM_020654       | SEN7           | SUMO1/sentrin specific peptidase 7                     | ENST00000314261 | 0,537082067 |

|               |                                 |                |                                                                      |                 |             |
|---------------|---------------------------------|----------------|----------------------------------------------------------------------|-----------------|-------------|
| A_23_P61674   | NM_020666                       | CLK4           | CDC-like kinase 4                                                    | ENST00000520878 | 0,536960346 |
| A_33_P3312366 | NM_003935                       | TOP3B          | topoisomerase (DNA) III beta                                         | ENST00000436282 | 0,53681073  |
| A_23_P417951  | NM_033512                       | TSPYL5         | TSPY-like 5                                                          | ENST00000322128 | 0,536581329 |
| A_23_P111303  | NM_014892                       | SCAF8          | SR-related CTD-associated factor 8                                   | ENST00000417268 | 0,536531039 |
| A_23_P33196   | NM_000393                       | COL5A2         | collagen, type V, alpha 2                                            | ENST00000452536 | 0,536461336 |
| A_24_P58122   | NM_015306                       | USP24          | ubiquitin specific peptidase 24                                      | ENST00000294383 | 0,536444999 |
| A_23_P101476  | NM_030824                       | ZNF442         | zinc finger protein 442                                              | ENST00000242804 | 0,536435973 |
| A_21_P0014775 | XR_132550                       | LOC100505637   |                                                                      |                 | 0,536428809 |
| A_21_P0000360 | NR_003019                       | SNORA77        | small nucleolar RNA, H/ACA box 77                                    |                 | 0,53628567  |
| A_33_P3326733 | NR_003524                       | LOC729668      | golgi autoantigen, golgin subfamily a, 6 pseudogene                  | ENST00000471055 | 0,536269507 |
| A_33_P3221343 | NM_173497                       | HECTD2         | HECT domain containing 2                                             | ENST00000371681 | 0,536168431 |
| A_33_P3369550 | NM_004768                       | SRSF11         | serine/arginine-rich splicing factor 11                              | ENST00000405432 | 0,536102068 |
| A_21_P0000106 | NM_001190487                    | MTRNR2L6       | MT-RNR2-like 6                                                       |                 | 0,535850037 |
| A_21_P0012979 | ENST00000514048                 | XLOC_I2_011987 |                                                                      | ENST00000514048 | 0,535751913 |
| A_23_P101623  | NM_022103                       | ZNF667         | zinc finger protein 667                                              | ENST00000360227 | 0,535747793 |
| A_23_P323751  | NM_030919                       | FAM83D         | family with sequence similarity 83, member D                         | ENST00000424027 | 0,535648329 |
| A_23_P106798  | NM_003031                       | SIAH1          | seven in absentia homolog 1 (Drosophila)                             | ENST00000356721 | 0,535592075 |
| A_21_P0011482 | TCONS_I2_0001017(XLOC_I2_005490 |                |                                                                      |                 | 0,535565349 |
| A_23_P114405  | NM_012286                       | MORF4L2        | mortality factor 4 like 2                                            | ENST00000423833 | 0,53550829  |
| A_23_P36018   | NM_014312                       | VSIG2          | V-set and immunoglobulin domain containing 2                         | ENST00000326621 | 0,535182474 |
| A_23_P256581  | NM_021620                       | PRDM13         | PR domain containing 13                                              | ENST00000369214 | 0,535116339 |
| A_33_P3368560 | BC050395                        | AHSA2          | AHA1, activator of heat shock 90kDa protein ATPase homolog 2 (yeast) |                 | 0,534668808 |
| A_21_P0003244 | D50525                          | XLOC_002730    |                                                                      |                 | 0,534638321 |
| A_33_P3402654 | NR_015358                       | FLJ43390       | uncharacterized LOC646113                                            |                 | 0,534602452 |
| A_23_P415633  | NM_001174103                    | SGK494         | uncharacterized serine/threonine-protein kinase SgK494               | ENST00000301037 | 0,534496307 |
| A_33_P3349883 | ENST00000366583                 | LGALS8         | lectin, galactoside-binding, soluble, 8                              | ENST00000366583 | 0,534495936 |
| A_33_P3236109 | NM_000275                       | OCA2           | oculocutaneous albinism II                                           | ENST00000382996 | 0,534483483 |
| A_24_P16950   | NM_198893                       | ZNF160         | zinc finger protein 160                                              | ENST00000429604 | 0,53448196  |
| A_21_P0011824 | NR_038386                       | LOC728537      | uncharacterized LOC728537                                            | ENST00000445382 | 0,534397282 |

|               |                  |                |                                                        |                 |             |
|---------------|------------------|----------------|--------------------------------------------------------|-----------------|-------------|
| A_21_P0013465 | ENST00000520524  | XLOC_I2_014086 |                                                        | ENST00000520524 | 0,534356894 |
| A_33_P3401841 | AK123920         | LOC100130453   | uncharacterized LOC100130453                           |                 | 0,534218927 |
| A_33_P3342448 | ENST00000510382  | ANK3           | ankyrin 3, node of Ranvier (ankyrin G)                 | ENST00000510382 | 0,534211946 |
| A_33_P3274009 | AK124556         | LOC100132966   | uncharacterized LOC100132966                           |                 | 0,534143258 |
| A_33_P3256894 | NM_001169107     | FAM21C         | family with sequence similarity 21, member C           | ENST00000434114 | 0,534117275 |
| A_21_P0013313 | TCONS_I2_0002660 | XLOC_I2_013857 |                                                        |                 | 0,534098828 |
| A_23_P30098   | NM_000670        | ADH4           | alcohol dehydrogenase 4 (class II), pi polypeptide     | ENST00000423445 | 0,533881616 |
| A_21_P0001704 | AW963279         | XLOC_000390    |                                                        |                 | 0,533860055 |
| A_32_P384562  | NR_023386        | CROCCP3        | ciliary rootlet coiled-coil, rootletin pseudogene 3    |                 | 0,533783259 |
| A_33_P3268564 | NM_001004722     | NCK2           | NCK adaptor protein 2                                  | ENST00000393348 | 0,533774972 |
| A_21_P0001246 | ENST00000458044  | XLOC_001265    |                                                        | ENST00000458044 | 0,53376687  |
| A_21_P0010245 | TCONS_00029019   | XLOC_013942    |                                                        |                 | 0,533657071 |
| A_23_P106737  | NM_201412        | LUC7L          | LUC7-like ( <i>S. cerevisiae</i> )                     | ENST00000418978 | 0,533438371 |
| A_21_P0014779 | ENST00000494753  | PLIN2          | perilipin 2                                            | ENST00000494753 | 0,533391151 |
| A_33_P3391596 | NM_001105206     | LAMA4          | laminin, alpha 4                                       |                 | 0,533328206 |
| A_23_P253921  | NM_018651        | ZNF167         | zinc finger protein 167                                | ENST00000273320 | 0,53331781  |
| A_23_P102242  | NM_022826        | Mar-07         | membrane-associated ring finger (C3HC4) 7              | ENST00000409175 | 0,533287168 |
| A_33_P3258988 | ENST00000380127  | GDI2           | GDP dissociation inhibitor 2                           | ENST00000380127 | 0,533237262 |
| A_24_P241330  | NM_024824        | ZC3H14         | zinc finger CCCH-type containing 14                    | ENST00000380684 | 0,533200215 |
| A_21_P0007367 | TCONS_00019696   | XLOC_009493    |                                                        |                 | 0,533111697 |
| A_23_P110606  | NM_014757        | MAML1          | mastermind-like 1 ( <i>Drosophila</i> )                | ENST00000292599 | 0,532981175 |
| A_23_P109636  | NM_015541        | LRIG1          | leucine-rich repeats and immunoglobulin-like domains 1 | ENST00000383702 | 0,532971706 |
| A_23_P118894  | NM_024320        | PRR15L         | proline rich 15-like                                   | ENST00000300557 | 0,532961722 |
| A_23_P250813  | NM_000553        | WRN            | Werner syndrome, RecQ helicase-like                    | ENST00000521620 | 0,532941968 |
| A_23_P212639  | NM_004593        | TRA2B          | transformer 2 beta homolog ( <i>Drosophila</i> )       | ENST00000456380 | 0,532890625 |
| A_33_P3353622 | NM_021163        | RBAK           | RB-associated KRAB zinc finger                         | ENST00000353796 | 0,532842299 |
| A_33_P3293753 | NM_198690        | KRTAP10-9      | keratin associated protein 10-9                        | ENST00000397911 | 0,532670324 |
| A_23_P114405  | NM_012286        | MORF4L2        | mortality factor 4 like 2                              | ENST00000423833 | 0,532669626 |
| A_23_P125639  | NM_003410        | ZFX            | zinc finger protein, X-linked                          | ENST00000540034 | 0,532341347 |

|                |                                 |              |                                                                               |                 |             |
|----------------|---------------------------------|--------------|-------------------------------------------------------------------------------|-----------------|-------------|
| A_19_P00808452 | NM_012309                       | SHANK2       |                                                                               | ENST00000460048 | 0,532297976 |
| A_23_P102242   | NM_022826                       | Mar-07       | membrane-associated ring finger (C3HC4) 7                                     | ENST00000409175 | 0,532130715 |
| A_21_P0003771  | TCONS_00008580                  | XLOC_004089  |                                                                               |                 | 0,532077084 |
| A_23_P101332   | NM_023008                       | KRI1         | KRI1 homolog (S. cerevisiae)                                                  | ENST00000478863 | 0,532021007 |
| A_23_P25403    | NM_013320                       | HCFC2        | host cell factor C2                                                           | ENST00000552343 | 0,53193873  |
| A_23_P324989   | ENST00000420326                 | RECQL5       | RecQ protein-like 5                                                           | ENST00000420326 | 0,531698461 |
| A_21_P0006396  | NR_033374                       | LOC100289019 | uncharacterized LOC100289019                                                  | ENST00000418747 | 0,531625615 |
| A_21_P0010654  | NM_001161334                    | HIST2H2BF    | histone cluster 2, H2bf                                                       | ENST00000369167 | 0,531390685 |
| A_23_P393713   | NM_002180                       | IGHMBP2      | immunoglobulin mu binding protein 2                                           | ENST00000255078 | 0,531349598 |
| A_33_P3260747  | ENST00000373677                 | NHSL2        | NHS-like 2                                                                    | ENST00000373677 | 0,531228419 |
| A_21_P0007182  | TCONS_00019246                  | XLOC_009078  |                                                                               |                 | 0,53112938  |
| A_24_P206344   | NM_152557                       | ZNF746       | zinc finger protein 746                                                       | ENST00000458143 | 0,531060098 |
| A_21_P0000223  | NR_000025                       | SNORD15B     | small nucleolar RNA, C/D box 15B                                              |                 | 0,530834858 |
| A_33_P3499102  | AK098115                        | RBM10        | RNA binding motif protein 10                                                  |                 | 0,530780259 |
| A_21_P0011301  | NR_026589                       | WHAMMP2      | WAS protein homolog associated with actin, golgi membranes and microtubules p |                 | 0,530709364 |
| A_33_P3271301  | NM_181492                       | TCF20        | transcription factor 20 (AR1)                                                 | ENST00000335626 | 0,530704608 |
| A_33_P3313825  | ENST00000383765                 | TGFBR2       | transforming growth factor, beta receptor II (70/80kDa)                       | ENST00000383765 | 0,53059289  |
| A_19_P00812250 | NM_005359                       | SMAD4        | SMAD family member 4                                                          | ENST00000342988 | 0,530464089 |
| A_21_P0010450  | TCONS_00029725                  | XLOC_014400  |                                                                               |                 | 0,530409097 |
| A_24_P56689    | NM_003456                       | ZNF205       | zinc finger protein 205                                                       | ENST00000219091 | 0,530409006 |
| A_23_P101461   | NM_030818                       | CCDC130      | coiled-coil domain containing 130                                             | ENST00000221554 | 0,530390039 |
| A_23_P9289     | NM_134428                       | RFX3         | regulatory factor X, 3 (influences HLA class II expression)                   | ENST00000458034 | 0,530308049 |
| A_24_P371962   | NM_001634                       | AMD1         | adenosylmethionine decarboxylase 1                                            | ENST00000368885 | 0,530253453 |
| A_21_P0014684  | XR_111563                       | LOC100507803 | uncharacterized LOC100507803                                                  |                 | 0,530248938 |
| A_23_P117928   | NM_014952                       | BAHD1        | bromo adjacent homology domain containing 1                                   | ENST00000416165 | 0,530204994 |
| A_21_P0011358  | TCONS_I2_0000896;XLOC_I2_004854 |              |                                                                               |                 | 0,530154042 |
| A_23_P256391   | NM_002078                       | GOLGA4       | golgin A4                                                                     | ENST00000361924 | 0,530107111 |
| A_23_P114713   | NM_000779                       | CYP4B1       | cytochrome P450, family 4, subfamily B, polypeptide 1                         | ENST00000371923 | 0,5300283   |
| A_21_P0000231  | NR_001294                       | SNORD64      | small nucleolar RNA, C/D box 64                                               |                 | 0,53001642  |



|                |                 |              |                                                             |                 |             |
|----------------|-----------------|--------------|-------------------------------------------------------------|-----------------|-------------|
| A_23_P106798   | NM_003031       | SIAH1        | seven in absentia homolog 1 (Drosophila)                    | ENST00000356721 | 0,529944836 |
| A_21_P0003955  | ENST00000505404 | XLOC_004268  |                                                             | ENST00000505404 | 0,529900795 |
| A_21_P0003885  | NM_002337       | LRPAP1       | low density lipoprotein receptor-related protein associated | ENST00000500728 | 0,529735525 |
| A_33_P3293114  | NM_001190987    | SRSF11       | serine/arginine-rich splicing factor 11                     | ENST00000395136 | 0,529617295 |
| A_21_P0014700  | XR_111905       | LOC100507769 | uncharacterized LOC100507769                                |                 | 0,529568771 |
| A_23_P368259   | NM_152361       | EID2B        | EP300 interacting inhibitor of differentiation 2B           | ENST00000326282 | 0,529540134 |
| A_24_P169544   | NM_006959       | ZNF17        | zinc finger protein 17                                      | ENST00000307658 | 0,529466033 |
| A_33_P3362521  | NM_016474       | C3orf19      | chromosome 3 open reading frame 19                          | ENST00000383794 | 0,529435409 |
| A_33_P3349395  | AF411609        | CECR2        | cat eye syndrome chromosome region, candidate 2             |                 | 0,529328924 |
| A_23_P114405   | NM_012286       | MORF4L2      | mortality factor 4 like 2                                   | ENST00000423833 | 0,529113748 |
| A_21_P0006008  | BC014180        | POLR1E       | polymerase (RNA) I polypeptide E, 53kDa                     | ENST00000413915 | 0,529106292 |
| A_33_P3290955  | NR_024207       | KIAA1875     | KIAA1875                                                    | ENST00000488801 | 0,529092037 |
| A_23_P114405   | NM_012286       | MORF4L2      | mortality factor 4 like 2                                   | ENST00000423833 | 0,529020766 |
| A_21_P0002195  | TCONS_00003626  | XLOC_001418  |                                                             |                 | 0,529006411 |
| A_23_P117928   | NM_014952       | BAHD1        | bromo adjacent homology domain containing 1                 | ENST00000416165 | 0,528962884 |
| A_33_P3264419  | NM_152758       | YTHDF3       | YTH domain family, member 3                                 |                 | 0,528731048 |
| A_24_P268786   | NM_018657       | MYNN         | myoneurin                                                   | ENST00000356716 | 0,52872039  |
| A_33_P3335183  | NM_199340       | LRR37A3      | leucine rich repeat containing 37, member A3                | ENST00000425901 | 0,528690552 |
| A_23_P117928   | NM_014952       | BAHD1        | bromo adjacent homology domain containing 1                 | ENST00000416165 | 0,528625111 |
| A_23_P122464   | NM_006299       | ZNF193       | zinc finger protein 193                                     | ENST00000252207 | 0,528622801 |
| A_23_P110606   | NM_014757       | MAML1        | mastermind-like 1 (Drosophila)                              | ENST00000292599 | 0,528419155 |
| A_19_P00318314 | XR_132650       | LOC100506694 | uncharacterized LOC100506694                                |                 | 0,528327889 |
| A_23_P24365    | NM_017704       | ANKRD49      | ankyrin repeat domain 49                                    | ENST00000302755 | 0,528309342 |
| A_33_P3284854  | AK127969        | FLJ25694     | uncharacterized protein FLJ25694                            |                 | 0,528286715 |
| A_24_P290354   | NM_006007       | ZFAND5       | zinc finger, AN1-type domain 5                              | ENST00000471197 | 0,52827755  |
| A_33_P3377194  | NM_033304       | ADRA1A       | adrenergic, alpha-1A-, receptor                             | ENST00000358857 | 0,528218533 |
| A_33_P3304688  | AF463496        | TNAP         | TRAFs and NIK-associated protein                            |                 | 0,52820956  |
| A_23_P110606   | NM_014757       | MAML1        | mastermind-like 1 (Drosophila)                              | ENST00000292599 | 0,528170539 |
| A_21_P0007846  | TCONS_00020536  | XLOC_009850  |                                                             |                 | 0,528108263 |

|                |                 |             |                                                               |                 |              |
|----------------|-----------------|-------------|---------------------------------------------------------------|-----------------|--------------|
| A_24_P71973    | NM_002253       | KDR         | kinase insert domain receptor (a type III receptor tyrosine k | ENST00000263923 | 0,528077083  |
| A_24_P122732   | NM_173854       | SLC41A1     | solute carrier family 41, member 1                            | ENST00000468057 | 0,527867712  |
| A_23_P10025    | NM_006159       | NELL2       | NEL-like 2 (chicken)                                          | ENST00000437801 | 0,52784865   |
| A_23_P90895    | NM_152994       | PPP1R21     | protein phosphatase 1, regulatory subunit 21                  | ENST00000460299 | 0,527832447  |
| A_23_P416314   | NM_054108       | HRASLS5     | HRAS-like suppressor family, member 5                         | ENST00000536887 | 0,527794096  |
| A_21_P0006439  | ENST00000430235 | XLOC_008099 |                                                               | ENST00000430235 | 0,527548495  |
| A_33_P3362636  | NM_001136498    | CISD3       | CDGSH iron sulfur domain 3                                    | ENST00000439660 | 0,527519202  |
| A_33_P3211569  | NM_001005915    | ERBB3       | v-erb-b2 erythroblastic leukemia viral oncogene homolog 3     | ENST00000411731 | 0,527398656  |
| A_23_P415015   | NM_022374       | ATL2        | atlastin GTPase 2                                             | ENST00000546051 | 0,527295839  |
| A_33_P3239122  | ENST00000372550 | PPIH        | peptidylprolyl isomerase H (cyclophilin H)                    | ENST00000372550 | 0,527231917  |
| A_23_P96633    | NM_001031705    | CXorf48     | chromosome X open reading frame 48                            | ENST00000344129 | 0,527229011  |
| A_33_P3210904  | AK095629        | SEC13       | SEC13 homolog (S. cerevisiae)                                 | ENST00000397101 | 0,527197373  |
| A_21_P0003722  | TCONS_00008437  | XLOC_003883 |                                                               |                 | 0,527193795  |
| A_23_P250813   | NM_000553       | WRN         | Werner syndrome, RecQ helicase-like                           | ENST00000521620 | 0,527115096  |
| A_23_P217570   | NM_014289       | CAPN6       | calpain 6                                                     | ENST00000324068 | 0,527028642  |
| A_24_P369232   | NM_031455       | CCDC3       | coiled-coil domain containing 3                               | ENST00000378839 | 0,52695528   |
| A_33_P3226380  | NR_029401       | LOC731275   | uncharacterized LOC731275                                     | ENST00000440038 | 0,526868273  |
| A_23_P252642   | NM_152384       | BBS5        | Bardet-Biedl syndrome 5                                       | ENST00000472667 | 0,526841686  |
| A_23_P502627   | NM_007156       | ZXDA        | zinc finger, X-linked, duplicated A                           | ENST00000358697 | 0,526833525  |
| A_33_P3253264  | NM_005341       | ZBTB48      | zinc finger and BTB domain containing 48                      | ENST00000466813 | 0,526809861  |
| A_23_P4400     | NM_033059       | KRTAP4-11   | keratin associated protein 4-11                               | ENST00000391413 | 0,526767198  |
| A_23_P111865   | NM_145914       | ZSCAN21     | zinc finger and SCAN domain containing 21                     | ENST00000292450 | 0,526762608  |
| A_23_P102242   | NM_022826       | Mar-07      | membrane-associated ring finger (C3HC4) 7                     | ENST00000409175 | 0,526714223  |
| A_19_P00318715 | NR_015431       | FLJ43663    | uncharacterized LOC378805                                     |                 | 0,5266613302 |
| A_23_P110606   | NM_014757       | MAML1       | mastermind-like 1 (Drosophila)                                | ENST00000292599 | 0,526563359  |
| A_21_P0011288  | NM_012102       | RERE        | arginine-glutamic acid dipeptide (RE) repeats                 | ENST00000480342 | 0,526555551  |
| A_32_P2392     | NM_181077       | GOLGA8A     | golgin A8 family, member A                                    | ENST00000509311 | 0,526530331  |
| A_23_P117928   | NM_014952       | BAHD1       | bromo adjacent homology domain containing 1                   | ENST00000416165 | 0,526472504  |
| A_23_P219197   | NM_134427       | RGS3        | regulator of G-protein signaling 3                            | ENST00000478599 | 0,526404728  |

|                |                 |                |                                                        |                 |             |
|----------------|-----------------|----------------|--------------------------------------------------------|-----------------|-------------|
| A_33_P3384775  | ENST00000398497 | ZNF295         | zinc finger protein 295                                | ENST00000398497 | 0,526375803 |
| A_19_P00319990 | ENST00000551938 | LOC100506948   |                                                        | ENST00000551938 | 0,526374376 |
| A_21_P0014478  | XR_110012       | LOC100506856   | uncharacterized LOC100506856                           |                 | 0,526372096 |
| A_23_P5339     | NM_030577       | TMEM177        | transmembrane protein 177                              | ENST00000424086 | 0,526224343 |
| A_21_P0005780  | TCONS_00014884  | XLOC_006954    |                                                        |                 | 0,52615188  |
| A_24_P349196   | NM_001080850    | CCDC30         | coiled-coil domain containing 30                       | ENST00000340612 | 0,52610318  |
| A_23_P115861   | NM_145312       | ZNF485         | zinc finger protein 485                                | ENST00000374437 | 0,526101301 |
| A_33_P3262292  | NM_015562       | UBXN7          | UBX domain protein 7                                   | ENST00000535858 | 0,525993915 |
| A_23_P68511    | NM_015985       | ANGPT4         | angiopoietin 4                                         | ENST00000546022 | 0,525949474 |
| A_23_P114405   | NM_012286       | MORF4L2        | mortality factor 4 like 2                              | ENST00000423833 | 0,525941902 |
| A_23_P102242   | NM_022826       | Mar-07         | membrane-associated ring finger (C3HC4) 7              | ENST00000409175 | 0,525661908 |
| A_21_P0011267  | NR_039982       | LOC283547      | uncharacterized LOC283547                              | ENST00000554732 | 0,525575147 |
| A_33_P3290567  | NM_003390       | WEE1           | WEE1 homolog (S. pombe)                                | ENST00000299613 | 0,525533902 |
| A_21_P0010875  | THC2533495      | XLOC_l2_001967 |                                                        |                 | 0,52540837  |
| A_33_P3271261  | NM_006181       | NTN3           | netrin 3                                               | ENST00000293973 | 0,525323079 |
| A_21_P0001780  | AK311291        | XLOC_001666    |                                                        |                 | 0,525046537 |
| A_23_P111303   | NM_014892       | SCAF8          | SR-related CTD-associated factor 8                     | ENST00000417268 | 0,525041907 |
| A_24_P169073   | NM_182623       | FAM131C        | family with sequence similarity 131, member C          | ENST00000375662 | 0,524963269 |
| A_21_P0009545  | TCONS_00026493  | XLOC_012819    |                                                        |                 | 0,524835406 |
| A_23_P109636   | NM_015541       | LRIG1          | leucine-rich repeats and immunoglobulin-like domains 1 | ENST00000383702 | 0,524819154 |
| A_21_P0010509  | NR_024455       | LOC100133612   | uncharacterized LOC100133612                           |                 | 0,524768167 |
| A_23_P68910    | NM_001051       | SSTR3          | somatostatin receptor 3                                | ENST00000402501 | 0,524455135 |
| A_23_P117515   | NM_002892       | ARID4A         | AT rich interactive domain 4A (RBP1-like)              | ENST00000395168 | 0,524327289 |
| A_23_P102242   | NM_022826       | Mar-07         | membrane-associated ring finger (C3HC4) 7              | ENST00000409175 | 0,524324747 |
| A_21_P0011403  | NR_024074       | GOLGA8IP       | golgin A8 family, member I, pseudogene                 | ENST00000339078 | 0,524260403 |
| A_23_P250813   | NM_000553       | WRN            | Werner syndrome, RecQ helicase-like                    | ENST00000521620 | 0,524195969 |
| A_33_P3388283  | ENST00000496907 | HMGCL          | 3-hydroxymethyl-3-methylglutaryl-CoA lyase             | ENST00000496907 | 0,524175209 |
| A_23_P105276   | NM_003428       | ZNF84          | zinc finger protein 84                                 | ENST00000543758 | 0,524110045 |
| A_23_P14389    | NM_014977       | ACIN1          | apoptotic chromatin condensation inducer 1             | ENST00000397341 | 0,524097408 |

|               |                 |                |                                                                             |                 |             |
|---------------|-----------------|----------------|-----------------------------------------------------------------------------|-----------------|-------------|
| A_21_P0006463 | ENST00000412420 | XLOC_008236    |                                                                             | ENST00000412420 | 0,524000473 |
| A_33_P3390391 | NM_015711       | GLTSCR1        | glioma tumor suppressor candidate region gene 1                             | ENST00000396720 | 0,523954873 |
| A_23_P106798  | NM_003031       | SIAH1          | seven in absentia homolog 1 (Drosophila)                                    | ENST00000356721 | 0,523854802 |
| A_33_P3311046 | NM_001004691    | OR2M7          | olfactory receptor, family 2, subfamily M, member 7                         | ENST00000317965 | 0,523798173 |
| A_33_P3271087 | NM_005553       | KRTAP5-9       | keratin associated protein 5-9                                              | ENST00000528743 | 0,523758212 |
| A_32_P505133  | NM_178830       | C19orf47       | chromosome 19 open reading frame 47                                         | ENST00000392035 | 0,523730278 |
| A_33_P3306659 | AB002446        | LOC728254      | uncharacterized LOC728254                                                   |                 | 0,523610697 |
| A_21_P0008911 | TCONS_00024348  | XLOC_011670    |                                                                             |                 | 0,523608515 |
| A_33_P3287892 | ENST00000480144 | SLTM           | SAFB-like, transcription modulator                                          | ENST00000480144 | 0,52356685  |
| A_33_P3340862 | NM_001146685    | TMEM88B        | transmembrane protein 88B                                                   |                 | 0,523374282 |
| A_33_P3352822 | NM_173631       | ZNF547         | zinc finger protein 547                                                     | ENST00000391704 | 0,52334171  |
| A_23_P133585  | NM_001799       | CDK7           | cyclin-dependent kinase 7                                                   | ENST00000256443 | 0,523307839 |
| A_33_P3268035 | NM_032517       | LYZL1          | lysozyme-like 1                                                             | ENST00000375500 | 0,523229324 |
| A_21_P0003951 | ENST00000512521 | XLOC_004263    |                                                                             | ENST00000512521 | 0,52321737  |
| A_21_P0003145 | TCONS_00006577  | XLOC_003200    |                                                                             |                 | 0,523101483 |
| A_33_P3395513 | ENST00000544729 | NRG2           | neuregulin 2                                                                | ENST00000544729 | 0,523071401 |
| A_21_P0010980 | NR_002819       | MALAT1         | metastasis associated lung adenocarcinoma transcript 1 (non-protein coding) |                 | 0,523033487 |
| A_33_P3343828 | AK126677        | FLJ42627       | uncharacterized LOC645644                                                   |                 | 0,522955953 |
| A_21_P0012064 | CR600703        | XLOC_I2_007986 |                                                                             |                 | 0,522920008 |
| A_23_P102242  | NM_022826       | Mar-07         | membrane-associated ring finger (C3HC4) 7                                   | ENST00000409175 | 0,522916124 |
| A_33_P3241316 | NM_213600       | PLA2G4F        | phospholipase A2, group IVF                                                 | ENST00000357924 | 0,522834036 |
| A_23_P109636  | NM_015541       | LRIG1          | leucine-rich repeats and immunoglobulin-like domains 1                      | ENST00000383702 | 0,522667735 |
| A_24_P203134  | NM_178470       | DCAF12L1       | DDB1 and CUL4 associated factor 12-like 1                                   | ENST00000371126 | 0,522644236 |
| A_23_P106737  | NM_201412       | LUC7L          | LUC7-like (S. cerevisiae)                                                   | ENST00000418978 | 0,522556303 |
| A_21_P0010493 | AK123495        | LOC389831      | uncharacterized LOC389831                                                   |                 | 0,522523025 |
| A_24_P349616  | NM_001076683    | UBTF           | upstream binding transcription factor, RNA polymerase I                     | ENST00000302904 | 0,522505141 |
| A_33_P3382217 | ENST00000541316 | KIF3A          | kinesin family member 3A                                                    | ENST00000541316 | 0,522488976 |
| A_21_P0002159 | TCONS_00003548  | XLOC_001320    |                                                                             |                 | 0,522136032 |
| A_21_P0005389 | THC2730801      | XLOC_006123    |                                                                             |                 | 0,522022915 |

|               |                 |                |                                                        |                 |             |
|---------------|-----------------|----------------|--------------------------------------------------------|-----------------|-------------|
| A_23_P121480  | NM_001004196    | CD200          | CD200 molecule                                         | ENST00000478595 | 0,521952088 |
| A_23_P49988   | NM_033062       | KRTAP4-2       | keratin associated protein 4-2                         | ENST00000377726 | 0,521908005 |
| A_23_P114084  | NM_000444       | PHEX           | phosphate regulating endopeptidase homolog, X-linked   | ENST00000537599 | 0,521787845 |
| A_24_P160380  | NM_176871       | PDLIM2         | PDZ and LIM domain 2 (mystique)                        | ENST00000265810 | 0,521653061 |
| A_21_P0011313 | THC2762855      | XLOC_I2_004611 |                                                        |                 | 0,521595341 |
| A_21_P0014591 | XR_110418       | LOC100507280   | uncharacterized LOC100507280                           |                 | 0,521510885 |
| A_21_P0010723 | ENST00000417260 | XLOC_I2_000401 |                                                        | ENST00000417260 | 0,52146091  |
| A_21_P0006021 | TCONS_00015699  | XLOC_007420    |                                                        |                 | 0,521459859 |
| A_21_P0010651 | THC2590496      | XLOC_I2_001089 |                                                        |                 | 0,521427657 |
| A_23_P30464   | NM_030567       | PRR7           | proline rich 7 (synaptic)                              | ENST00000502922 | 0,521373235 |
| A_21_P0009784 | THC2615013      | XLOC_013037    |                                                        |                 | 0,521317502 |
| A_33_P3262495 | NM_032772       | ZNF503         | zinc finger protein 503                                | ENST00000372524 | 0,521255068 |
| A_33_P3225873 | NR_028324       | FLJ45445       | uncharacterized LOC399844                              | ENST00000425496 | 0,521182031 |
| A_21_P0003045 | TCONS_00007008  | XLOC_002878    |                                                        |                 | 0,521069276 |
| A_33_P3420747 | NM_022828       | YTHDC2         | YTH domain containing 2                                | ENST00000161863 | 0,520889453 |
| A_23_P109636  | NM_015541       | LRIG1          | leucine-rich repeats and immunoglobulin-like domains 1 | ENST00000383702 | 0,520880734 |
| A_23_P170820  | NM_001020658    | PUM1           | pumilio homolog 1 (Drosophila)                         | ENST00000440538 | 0,520874704 |
| A_33_P3400324 | NM_024947       | PHC3           | polyhomeotic homolog 3 (Drosophila)                    |                 | 0,520864212 |
| A_23_P114405  | NM_012286       | MORF4L2        | mortality factor 4 like 2                              | ENST00000423833 | 0,520738008 |
| A_24_P238143  | NM_001006607    | LRRC37A2       | leucine rich repeat containing 37, member A2           | ENST00000547334 | 0,520694133 |
| A_23_P47839   | NM_020936       | DDX55          | DEAD (Asp-Glu-Ala-Asp) box polypeptide 55              | ENST00000238146 | 0,520515182 |
| A_33_P3397955 | NR_002808       | ITPK1-AS1      | ITPK1 antisense RNA 1 (non-protein coding)             | ENST00000553639 | 0,520379786 |
| A_21_P0001619 | THC2630478      | XLOC_001195    |                                                        |                 | 0,520343542 |
| A_21_P0014904 | XR_132901       | LOC100652738   | uncharacterized LOC100652738                           |                 | 0,520288403 |
| A_33_P3383351 | ENST00000464187 | COL5A1         | collagen, type V, alpha 1                              | ENST00000464187 | 0,520277815 |
| A_21_P0000341 | NR_002987       | SNORA61        | small nucleolar RNA, H/ACA box 61                      |                 | 0,52019527  |
| A_23_P117928  | NM_014952       | BAHD1          | bromo adjacent homology domain containing 1            | ENST00000416165 | 0,52019285  |
| A_21_P0007318 | NR_033972       | LOC440028      | uncharacterized LOC440028                              |                 | 0,520182579 |
| A_23_P88880   | NM_015069       | ZNF423         | zinc finger protein 423                                | ENST00000535559 | 0,520101555 |



|                |                 |              |                                                               |                 |             |
|----------------|-----------------|--------------|---------------------------------------------------------------|-----------------|-------------|
| A_23_P115842   | NM_018237       | CCAR1        | cell division cycle and apoptosis regulator 1                 | ENST00000540210 | 0,520091526 |
| A_23_P67896    | NM_006922       | SCN3A        | sodium channel, voltage-gated, type III, alpha subunit        | ENST00000540861 | 0,520017495 |
| A_33_P3417113  | NM_207173       | NPSR1        | neuropeptide S receptor 1                                     | ENST00000381553 | 0,519952666 |
| A_21_P0010486  | THC2478115      | XLOC_014484  |                                                               |                 | 0,519878125 |
| A_24_P161813   | NR_024380       | LOC441666    | zinc finger protein 91 pseudogene                             |                 | 0,519866626 |
| A_23_P250813   | NM_000553       | WRN          | Werner syndrome, RecQ helicase-like                           | ENST00000521620 | 0,519845782 |
| A_23_P107801   | NM_032207       | C19orf44     | chromosome 19 open reading frame 44                           | ENST00000221671 | 0,51978932  |
| A_19_P00321998 | BC035182        | LOC729178    | uncharacterized LOC729178                                     |                 | 0,519779897 |
| A_23_P250813   | NM_000553       | WRN          | Werner syndrome, RecQ helicase-like                           | ENST00000521620 | 0,519759385 |
| A_19_P00319633 | NR_037178       | LOC100294145 | uncharacterized LOC100294145                                  |                 | 0,519738314 |
| A_23_P150362   | NM_031275       | TEX12        | testis expressed 12                                           | ENST00000530752 | 0,519450499 |
| A_24_P367211   | NM_014598       | SOCS7        | suppressor of cytokine signaling 7                            | ENST00000331159 | 0,519399076 |
| A_23_P68868    | NR_002323       | TUG1         | taurine upregulated 1 (non-protein coding)                    |                 | 0,51938707  |
| A_23_P168629   | NM_018077       | RBM28        | RNA binding motif protein 28                                  | ENST00000481788 | 0,519352181 |
| A_33_P3309741  | ENST00000441164 | CCDC108      | coiled-coil domain containing 108                             | ENST00000441164 | 0,519327695 |
| A_23_P4798     | NM_016535       | ZNF581       | zinc finger protein 581                                       | ENST00000270451 | 0,519294131 |
| A_21_P0000209  | NR_000009       | SNORD4B      | small nucleolar RNA, C/D box 4B                               |                 | 0,519193699 |
| A_21_P0000321  | NR_002967       | SNORA31      | small nucleolar RNA, H/ACA box 31                             | ENST00000534033 | 0,519159467 |
| A_23_P139965   | NM_001010897    | SERP2        | stress-associated endoplasmic reticulum protein family member | ENST00000493476 | 0,519139362 |
| A_33_P3485760  | ENST00000462527 | EIF3A        | eukaryotic translation initiation factor 3, subunit A         | ENST00000462527 | 0,519080581 |
| A_33_P3307490  | ENST00000378189 | SYNRG        | synergin, gamma                                               | ENST00000378189 | 0,519030203 |
| A_23_P250813   | NM_000553       | WRN          | Werner syndrome, RecQ helicase-like                           | ENST00000521620 | 0,519009117 |
| A_33_P3236272  | NM_001173539    | BANP         | BTG3 associated nuclear protein                               | ENST00000286122 | 0,519003545 |
| A_33_P3353425  | NM_020935       | USP37        | ubiquitin specific peptidase 37                               | ENST00000478329 | 0,518974268 |
| A_33_P3381796  | XR_108716       | LOC393078    | uncharacterized LOC393078                                     |                 | 0,518941523 |
| A_33_P3373046  | NM_001024596    | ZNF772       | zinc finger protein 772                                       | ENST00000291809 | 0,518926398 |
| A_21_P0014288  | XR_109155       | ANKRD10-IT1  | ANKRD10 intronic transcript 1 (non-protein coding)            |                 | 0,518911064 |
| A_21_P0004766  | ENST00000434493 | XLOC_005782  |                                                               | ENST00000434493 | 0,518904602 |
| A_23_P133284   | NM_018343       | RIOK2        | RIO kinase 2 (yeast)                                          | ENST00000283109 | 0,518891652 |

|                |                  |                |                                                                               |                 |             |
|----------------|------------------|----------------|-------------------------------------------------------------------------------|-----------------|-------------|
| A_23_P117928   | NM_014952        | BAHD1          | bromo adjacent homology domain containing 1                                   | ENST00000416165 | 0,518848295 |
| A_21_P0010322  | TCONS_00029300   | XLOC_014097    |                                                                               |                 | 0,518661333 |
| A_23_P117928   | NM_014952        | BAHD1          | bromo adjacent homology domain containing 1                                   | ENST00000416165 | 0,518508881 |
| A_23_P111865   | NM_145914        | ZSCAN21        | zinc finger and SCAN domain containing 21                                     | ENST00000292450 | 0,518490744 |
| A_23_P116168   | NM_032424        | KIAA1826       | KIAA1826                                                                      | ENST00000301919 | 0,518432367 |
| A_33_P3209030  | NM_001082480     | ZNF623         | zinc finger protein 623                                                       | ENST00000328466 | 0,517788322 |
| A_32_P94       | NM_198560        | LHFPL4         | lipoma HMGIC fusion partner-like 4                                            |                 | 0,517666253 |
| A_23_P114405   | NM_012286        | MORF4L2        | mortality factor 4 like 2                                                     | ENST00000423833 | 0,517587129 |
| A_23_P314115   | NM_005180        | BMI1           | BMI1 polycomb ring finger oncogene                                            | ENST00000376691 | 0,517520693 |
| A_23_P101461   | NM_030818        | CCDC130        | coiled-coil domain containing 130                                             | ENST00000221554 | 0,517050972 |
| A_19_P00801735 | TCONS_I2_0002650 | XLOC_I2_013783 |                                                                               |                 | 0,51695586  |
| A_23_P259393   | NM_001005159     | SFMBT1         | Scm-like with four mbt domains 1                                              | ENST00000394750 | 0,51689568  |
| A_24_P383850   | NM_003760        | EIF4G3         | eukaryotic translation initiation factor 4 gamma, 3                           | ENST00000374927 | 0,516707224 |
| A_33_P3378284  | NM_144613        | COX6B2         | cytochrome c oxidase subunit VIb polypeptide 2 (testis)                       | ENST00000326529 | 0,516589609 |
| A_33_P3317553  | NR_036650        | LOC100288615   | WAS protein homolog associated with actin, golgi membranes and microtubules p |                 | 0,51648128  |
| A_24_P129632   | NM_004747        | DLG5           | discs, large homolog 5 (Drosophila)                                           | ENST00000372388 | 0,516231051 |
| A_23_P134729   | NR_027259        | C8orf39        | chromosome 8 open reading frame 39                                            | ENST00000391680 | 0,516213292 |
| A_21_P0011791  | ENST00000435062  | XLOC_I2_007184 |                                                                               | ENST00000435062 | 0,516142437 |
| A_23_P116168   | NM_032424        | KIAA1826       | KIAA1826                                                                      | ENST00000301919 | 0,516141007 |
| A_33_P3324651  | NM_001242600     | RBM39          | RNA binding motif protein 39                                                  | ENST00000433027 | 0,516116619 |
| A_23_P122464   | NM_006299        | ZNF193         | zinc finger protein 193                                                       | ENST00000252207 | 0,516099616 |
| A_23_P110882   | NM_021648        | TSPYL4         | TSPY-like 4                                                                   | ENST00000420283 | 0,516047975 |
| A_33_P3235330  | NM_021090        | MTMR3          | myotubularin related protein 3                                                | ENST00000333027 | 0,515948896 |
| A_21_P0011663  | AY262164         | GTSCR1         | Gilles de la Tourette syndrome chromosome region, candidate 1                 |                 | 0,515947357 |
| A_24_P382401   | NM_153358        | ZNF791         | zinc finger protein 791                                                       | ENST00000393303 | 0,515946649 |
| A_21_P0014694  | XR_111767        | LOC100509487   | uncharacterized LOC100509487                                                  |                 | 0,515937714 |
| A_23_P401675   | ENST00000454295  | MARVELD2       | MARVEL domain containing 2                                                    | ENST00000454295 | 0,515875755 |
| A_23_P29803    | NM_006232        | POLR2H         | polymerase (RNA) II (DNA directed) polypeptide H                              | ENST00000476003 | 0,515851478 |
| A_23_P111865   | NM_145914        | ZSCAN21        | zinc finger and SCAN domain containing 21                                     | ENST00000292450 | 0,515829564 |

|               |                 |              |                                                           |                 |             |
|---------------|-----------------|--------------|-----------------------------------------------------------|-----------------|-------------|
| A_23_P85441   | NM_020789       | IGSF9        | immunoglobulin superfamily, member 9                      | ENST00000198587 | 0,515790902 |
| A_24_P820037  | NM_001010898    | SLC6A17      | solute carrier family 6, member 17                        | ENST00000450985 | 0,51573356  |
| A_23_P105276  | NM_003428       | ZNF84        | zinc finger protein 84                                    | ENST00000543758 | 0,515695772 |
| A_32_P88635   | NM_032264       | NBPF3        | neuroblastoma breakpoint family, member 3                 | ENST00000318249 | 0,515539787 |
| A_23_P114903  | NM_002155       | HSPA6        | heat shock 70kDa protein 6 (HSP70B')                      | ENST00000545155 | 0,515509155 |
| A_33_P3377239 | NR_026885       | LOC100270804 | uncharacterized LOC100270804                              |                 | 0,515444504 |
| A_23_P29079   | NM_002626       | PFKL         | phosphofructokinase, liver                                | ENST00000495274 | 0,515391315 |
| A_33_P3272429 | ENST00000472407 | CCDC126      | coiled-coil domain containing 126                         | ENST00000472407 | 0,515357775 |
| A_21_P0003155 | NR_015414       | LOC151658    | uncharacterized LOC151658                                 | ENST00000464359 | 0,515074875 |
| A_23_P106798  | NM_003031       | SIAH1        | seven in absentia homolog 1 (Drosophila)                  | ENST00000356721 | 0,515021862 |
| A_32_P150086  | NR_040113       | ANKRD20A5P   | ankyrin repeat domain 20 family, member A5, pseudogene    |                 | 0,514949001 |
| A_21_P0012473 | NM_007146       | VEZF1        | vascular endothelial zinc finger 1                        | ENST00000258963 | 0,514894284 |
| A_23_P215534  | NM_053043       | RBM33        | RNA binding motif protein 33                              | ENST00000307403 | 0,514863884 |
| A_33_P3642648 | NM_006635       | ZNF460       | zinc finger protein 460                                   | ENST00000360338 | 0,51486348  |
| A_23_P117928  | NM_014952       | BAHD1        | bromo adjacent homology domain containing 1               | ENST00000416165 | 0,514842936 |
| A_23_P150255  | NM_006328       | RBM14        | RNA binding motif protein 14                              | ENST00000310137 | 0,514730642 |
| A_23_P212568  | NM_016388       | TRAT1        | T cell receptor associated transmembrane adaptor 1        | ENST00000295756 | 0,514671169 |
| A_21_P0006658 | THC2503064      | XLOC_008405  |                                                           |                 | 0,514632381 |
| A_23_P335495  | NM_001001891    | ANO7         | anoctamin 7                                               | ENST00000487192 | 0,514562504 |
| A_33_P3421365 | NM_194320       | ZNF169       | zinc finger protein 169                                   | ENST00000340911 | 0,514537981 |
| A_23_P116168  | NM_032424       | KIAA1826     | KIAA1826                                                  | ENST00000301919 | 0,514530256 |
| A_23_P255331  | NM_032623       | C4orf49      | chromosome 4 open reading frame 49                        | ENST00000398955 | 0,514528736 |
| A_33_P3285764 | ENST00000467013 | EPHB1        | EPH receptor B1                                           | ENST00000467013 | 0,514523969 |
| A_33_P3209167 | AK095564        | LOC100131053 | uncharacterized LOC100131053                              |                 | 0,514422266 |
| A_33_P3283420 | NM_203390       | RBM12B       | RNA binding motif protein 12B                             | ENST00000517700 | 0,514418318 |
| A_23_P101623  | NM_022103       | ZNF667       | zinc finger protein 667                                   | ENST00000360227 | 0,51441329  |
| A_33_P3373185 | NR_024497       | LOC399744    | uncharacterized LOC399744                                 | ENST00000438516 | 0,51438243  |
| A_33_P3268403 | ENST00000476050 | TRAF3IP3     | TRAF3 interacting protein 3                               | ENST00000476050 | 0,514362797 |
| A_23_P110253  | NM_000222       | KIT          | v-kit Hardy-Zuckerman 4 feline sarcoma viral oncogene hon | ENST00000288135 | 0,51428539  |

|                |                  |                |                                                              |                 |             |
|----------------|------------------|----------------|--------------------------------------------------------------|-----------------|-------------|
| A_33_P3302741  | ENST00000383091  | ZSCAN30        | zinc finger and SCAN domain containing 30                    | ENST00000383091 | 0,514178937 |
| A_23_P250813   | NM_000553        | WRN            | Werner syndrome, RecQ helicase-like                          | ENST00000521620 | 0,514152221 |
| A_33_P3268310  | NM_001205288     | LIMS3L         | LIM and senescent cell antigen-like domains 3-like           | ENST00000303002 | 0,514135542 |
| A_21_P0013922  | XM_002342076     | LOC100287437   | uncharacterized LOC100287437                                 |                 | 0,514110428 |
| A_23_P142671   | NM_144631        | ZNF513         | zinc finger protein 513                                      | ENST00000491924 | 0,513983504 |
| A_33_P3212799  | NR_026997        | C22orf34       | chromosome 22 open reading frame 34                          | ENST00000400023 | 0,513967897 |
| A_33_P3330546  | NM_152557        | ZNF746         | zinc finger protein 746                                      | ENST00000486492 | 0,513943917 |
| A_33_P3275707  | NM_001039569     | AP1S3          | adaptor-related protein complex 1, sigma 3 subunit           |                 | 0,513900414 |
| A_23_P54488    | NM_015162        | ACSBG1         | acyl-CoA synthetase bubblegum family member 1                | ENST00000541759 | 0,513616689 |
| A_21_P0011021  | NR_024248        | LOC650368      | asparagine-linked glycosylation 1-like pseudogene            | ENST00000526488 | 0,513546354 |
| A_33_P3308497  | NR_026592        | BMS1P4         | BMS1 pseudogene 4                                            | ENST00000399449 | 0,513520935 |
| A_33_P3325349  | NM_005723        | TSPAN5         | tetraspanin 5                                                | ENST00000305798 | 0,513469125 |
| A_21_P0011657  | TCONS_I2_0001198 | XLOC_I2_006417 |                                                              |                 | 0,513254783 |
| A_23_P250813   | NM_000553        | WRN            | Werner syndrome, RecQ helicase-like                          | ENST00000521620 | 0,513200695 |
| A_33_P3224380  | NM_001098424     | DLG1           | discs, large homolog 1 (Drosophila)                          | ENST00000392381 | 0,513177359 |
| A_23_P18205    | NM_015106        | RAD54L2        | RAD54-like 2 (S. cerevisiae)                                 | ENST00000296477 | 0,513154901 |
| A_23_P95130    | NM_207113        | SLC37A3        | solute carrier family 37 (glycerol-3-phosphate transporter), | ENST00000473060 | 0,513154219 |
| A_23_P99853    | NM_019600        | KIAA1370       | KIAA1370                                                     | ENST00000546305 | 0,513145133 |
| A_23_P108221   | NM_032037        | TSSK6          | testis-specific serine kinase 6                              | ENST00000360913 | 0,513089485 |
| A_23_P117261   | NM_130806        | RXFP2          | relaxin/insulin-like family peptide receptor 2               | ENST00000298386 | 0,513020898 |
| A_23_P52176    | NM_003431        | ZNF124         | zinc finger protein 124                                      | ENST00000366499 | 0,512830064 |
| A_21_P0010590  | THC2520724       | XLOC_I2_000727 |                                                              |                 | 0,512661282 |
| A_19_P00321230 | NR_026921        | LOC202181      | chromosome 5 open reading frame 25 pseudogene                |                 | 0,512584778 |
| A_23_P208208   | NM_023074        | ZNF649         | zinc finger protein 649                                      | ENST00000354957 | 0,512396888 |
| A_33_P3343800  | ENST00000443925  | TSSC1          | tumor suppressing subtransferable candidate 1                | ENST00000443925 | 0,512349396 |
| A_23_P407132   | NM_032531        | KIRREL3        | kin of IRRE like 3 (Drosophila)                              | ENST00000526519 | 0,5122675   |
| A_24_P358868   | XM_001720936     | ZNF728         | zinc finger protein 728                                      |                 | 0,51199446  |
| A_23_P115842   | NM_018237        | CCAR1          | cell division cycle and apoptosis regulator 1                | ENST00000540210 | 0,511977784 |
| A_23_P115842   | NM_018237        | CCAR1          | cell division cycle and apoptosis regulator 1                | ENST00000540210 | 0,511965392 |

|                |                 |                |                                                              |                 |             |
|----------------|-----------------|----------------|--------------------------------------------------------------|-----------------|-------------|
| A_33_P3422035  | ENST00000392217 | FXYS5          | FXYS domain containing ion transport regulator 5             | ENST00000392217 | 0,511793742 |
| A_21_P0008662  | TCONS_00023483  | XLOC_011329    |                                                              |                 | 0,511789919 |
| A_33_P3330731  | ENST00000406335 | RHBDD3         | rhomoid domain containing 3                                  | ENST00000406335 | 0,511788692 |
| A_21_P0006551  | AK098726        | XLOC_008244    |                                                              |                 | 0,511732512 |
| A_33_P3274528  | NM_001010907    | C9orf153       | chromosome 9 open reading frame 153                          | ENST00000376001 | 0,511647864 |
| A_33_P3465703  | BF304636        | SNORA60        | small nucleolar RNA, H/ACA box 60                            |                 | 0,511569862 |
| A_23_P426944   | NM_006194       | PAX9           | paired box 9                                                 | ENST00000543853 | 0,511561527 |
| A_23_P101461   | NM_030818       | CCDC130        | coiled-coil domain containing 130                            | ENST00000221554 | 0,511522643 |
| A_21_P0005276  | BC013024        | LOC154822      | uncharacterized LOC154822                                    |                 | 0,511273534 |
| A_21_P0005679  | TCONS_00014664  | XLOC_006763    |                                                              |                 | 0,51127214  |
| A_23_P109636   | NM_015541       | LRIG1          | leucine-rich repeats and immunoglobulin-like domains 1       | ENST00000383702 | 0,511258547 |
| A_21_P0007384  | TCONS_00019734  | XLOC_009526    |                                                              |                 | 0,511165903 |
| A_24_P38572    | NM_022917       | NOL6           | nucleolar protein family 6 (RNA-associated)                  | ENST00000325914 | 0,511163592 |
| A_23_P309803   | NM_015694       | ZNF777         | zinc finger protein 777                                      | ENST00000314683 | 0,511106231 |
| A_32_P26330    | NM_005153       | USP10          | ubiquitin specific peptidase 10                              | ENST00000540269 | 0,510990409 |
| A_33_P3809606  | AK127576        | FLJ45671       | uncharacterized LOC400212                                    |                 | 0,510983035 |
| A_33_P3393806  | ENST00000502860 | ATP13A2        | ATPase type 13A2                                             | ENST00000502860 | 0,510920893 |
| A_23_P101461   | NM_030818       | CCDC130        | coiled-coil domain containing 130                            | ENST00000221554 | 0,510890765 |
| A_33_P3327663  | ENST00000366877 | SUSD4          | sushi domain containing 4                                    | ENST00000366877 | 0,510749752 |
| A_19_P00316000 | NR_015431       | FLJ43663       | uncharacterized LOC378805                                    |                 | 0,510687088 |
| A_21_P0001283  | TCONS_00000890  | XLOC_000141    |                                                              |                 | 0,510677014 |
| A_21_P0013213  | BF105084        | XLOC_I2_013442 |                                                              |                 | 0,510642688 |
| A_33_P3337272  | NM_001004354    | NRARP          | NOTCH-regulated ankyrin repeat protein                       | ENST00000356628 | 0,510620845 |
| A_23_P162918   | NM_001085       | SERPINA3       | serpin peptidase inhibitor, clade A (alpha-1 antiproteinase, | ENST00000555820 | 0,51055431  |
| A_23_P377664   | NM_001135745    | ALS2           | amyotrophic lateral sclerosis 2 (juvenile)                   | ENST00000467448 | 0,510524877 |
| A_33_P3302428  | NM_001142640    | TNRC6C         | trinucleotide repeat containing 6C                           | ENST00000301624 | 0,510451602 |
| A_33_P3368193  | NM_001011709    | PNLIPRP3       | pancreatic lipase-related protein 3                          | ENST00000369230 | 0,510410699 |
| A_33_P3308706  | ENST00000525257 | USP47          | ubiquitin specific peptidase 47                              | ENST00000525257 | 0,510317582 |
| A_21_P0004421  | BQ232757        | XLOC_004924    |                                                              |                 | 0,510294812 |



|               |                 |              |                                                                          |                 |              |
|---------------|-----------------|--------------|--------------------------------------------------------------------------|-----------------|--------------|
| A_23_P121222  | NM_020165       | RAD18        | RAD18 homolog ( <i>S. cerevisiae</i> )                                   | ENST00000264926 | -0,500047872 |
| A_23_P93499   | NM_016020       | TFB1M        | transcription factor B1, mitochondrial                                   | ENST00000495806 | -0,500121354 |
| A_33_P3380587 | NM_012199       | EIF2C1       | eukaryotic translation initiation factor 2C, 1                           | ENST00000373206 | -0,500166768 |
| A_33_P3377256 | NR_036498       | LOC388906    | opioid growth factor receptor pseudogene                                 |                 | -0,500221622 |
| A_21_P0008442 | TCONS_00022754  | XLOC_011036  |                                                                          |                 | -0,500235901 |
| A_33_P3312819 | NR_028044       | IGF2-AS      | insulin-like growth factor 2 antisense (non-protein coding)              | ENST00000381363 | -0,500304381 |
| A_21_P0002444 | THC2669550      | XLOC_002108  |                                                                          |                 | -0,500365587 |
| A_21_P0014218 | XR_108901       | LOC100507186 | uncharacterized LOC100507186                                             |                 | -0,50044505  |
| A_24_P404033  | NM_182616       | C15orf38     | chromosome 15 open reading frame 38                                      | ENST00000460685 | -0,500474426 |
| A_23_P412321  | NM_000579       | CCR5         | chemokine (C-C motif) receptor 5                                         | ENST00000343801 | -0,500515412 |
| A_33_P3286157 | NM_003327       | TNFRSF4      | tumor necrosis factor receptor superfamily, member 4                     | ENST00000497869 | -0,500678136 |
| A_23_P162211  | NM_018050       | MANSC1       | MANSC domain containing 1                                                | ENST00000535902 | -0,500680364 |
| A_21_P0008361 | TCONS_00022564  | XLOC_010883  |                                                                          |                 | -0,500770428 |
| A_23_P103617  | NM_003568       | ANXA9        | annexin A9                                                               | ENST00000368947 | -0,500862863 |
| A_23_P62932   | NM_001677       | ATP1B1       | ATPase, Na <sup>+</sup> /K <sup>+</sup> transporting, beta 1 polypeptide | ENST00000367816 | -0,50087657  |
| A_23_P11295   | NM_001018024    | MTCP1NB      | mature T-cell proliferation 1 neighbor                                   | ENST00000369479 | -0,501022365 |
| A_23_P203540  | NM_012153       | EHF          | ets homologous factor                                                    | ENST00000257831 | -0,501038447 |
| A_23_P23765   | NM_014288       | ITGB3BP      | integrin beta 3 binding protein (beta3-endonexin)                        | ENST00000283568 | -0,501050521 |
| A_33_P3413993 | ENST00000405496 | SERPING1     | serpin peptidase inhibitor, clade G (C1 inhibitor), member 1             | ENST00000405496 | -0,501067547 |
| A_23_P71598   | NM_003829       | MPDZ         | multiple PDZ domain protein                                              | ENST00000319198 | -0,501093993 |
| A_23_P97457   | NM_022831       | AIDA         | axin interactor, dorsalization associated                                | ENST00000355727 | -0,501258356 |
| A_23_P10506   | NM_014485       | HPGDS        | hematopoietic prostaglandin D synthase                                   | ENST00000295256 | -0,501310618 |
| A_23_P117274  | NM_005932       | MIPEP        | mitochondrial intermediate peptidase                                     | ENST00000382172 | -0,501351017 |
| A_23_P120860  | NM_003634       | NIPSNAP1     | nipsnap homolog 1 ( <i>C. elegans</i> )                                  | ENST00000216121 | -0,501405547 |
| A_33_P3418209 | NM_004791       | ITGBL1       | integrin, beta-like 1 (with EGF-like repeat domains)                     | ENST00000376162 | -0,501499836 |
| A_23_P102471  | NM_000251       | MSH2         | mutS homolog 2, colon cancer, nonpolyposis type 1 ( <i>E. coli</i> )     | ENST00000543555 | -0,501572953 |
| A_21_P0000812 | NR_038458       | LOC400604    | uncharacterized LOC400604                                                |                 | -0,501703273 |
| A_23_P53081   | NM_020896       | OSBPL5       | oxysterol binding protein-like 5                                         | ENST00000534454 | -0,50171737  |
| A_23_P116829  | NM_003348       | UBE2N        | ubiquitin-conjugating enzyme E2N                                         | ENST00000318066 | -0,501768364 |

|               |                 |             |                                                                                                |                 |              |
|---------------|-----------------|-------------|------------------------------------------------------------------------------------------------|-----------------|--------------|
| A_23_P206806  | NM_002209       | ITGAL       | integrin, alpha L (antigen CD11A (p180), lymphocyte function-associated antigen 1)             | ENST00000356798 | -0,501781547 |
| A_23_P204736  | NM_005276       | GPD1        | glycerol-3-phosphate dehydrogenase 1 (soluble)                                                 | ENST00000301149 | -0,501806661 |
| A_33_P3230818 | NM_001251973    | RCAN2       | regulator of calcineurin 2                                                                     | ENST00000405162 | -0,501812482 |
| A_23_P435657  | NR_003683       | ALMS1P      | Alstrom syndrome 1 pseudogene                                                                  | ENST00000450720 | -0,501838862 |
| A_24_P135255  | NR_003365       | SUGT1P3     | suppressor of G2 allele of SKP1 (S. cerevisiae) pseudogene 3                                   | ENST00000304932 | -0,501995326 |
| A_23_P115356  | NM_003689       | AKR7A2      | aldo-keto reductase family 7, member A2 (aflatoxin aldehyde reductase)                         | ENST00000235835 | -0,50202057  |
| A_33_P3235321 | NM_032872       | SYTL1       | synaptotagmin-like 1                                                                           | ENST00000496001 | -0,502172821 |
| A_23_P147711  | NM_000906       | NPR1        | natriuretic peptide receptor A/guanylate cyclase A (atrional)                                  | ENST00000428723 | -0,502180238 |
| A_23_P71855   | NM_001735       | C5          | complement component 5                                                                         | ENST00000223642 | -0,502289355 |
| A_23_P115645  | NM_001025076    | CELF2       | CUGBP, Elav-like family member 2                                                               | ENST00000537122 | -0,502319919 |
| A_23_P105619  | NM_138341       | TMEM116     | transmembrane protein 116                                                                      | ENST00000552801 | -0,502449067 |
| A_33_P3396214 | NM_172229       | KREMEN2     | kringle containing transmembrane protein 2                                                     | ENST00000303746 | -0,502471237 |
| A_23_P76435   | NM_176818       | GATC        | glutamyl-tRNA(Gln) amidotransferase, subunit C homolog (liver)                                 | ENST00000548171 | -0,502545566 |
| A_23_P11543   | NM_000147       | FUCA1       | fucosidase, alpha-L- 1, tissue                                                                 | ENST00000374479 | -0,502546934 |
| A_23_P119337  | NM_012068       | ATF5        | activating transcription factor 5                                                              | ENST00000423777 | -0,502632648 |
| A_23_P253052  | NM_031462       | CD99L2      | CD99 molecule-like 2                                                                           | ENST00000355149 | -0,50263351  |
| A_33_P3280694 | ENST00000334003 | PION        | pigeon homolog (Drosophila)                                                                    | ENST00000334003 | -0,502704688 |
| A_21_P0003446 | TCONS_00007714  | XLOC_003872 |                                                                                                |                 | -0,502719332 |
| A_32_P157481  | NM_005236       | ERCC4       | excision repair cross-complementing rodent repair deficiency and prokaryotic homologue group 4 | ENST00000311895 | -0,502755918 |
| A_23_P39315   | NM_021187       | CYP4F11     | cytochrome P450, family 4, subfamily F, polypeptide 11                                         | ENST00000326742 | -0,50283858  |
| A_23_P210176  | NM_000210       | ITGA6       | integrin, alpha 6                                                                              | ENST00000264107 | -0,502864759 |
| A_23_P78543   | NM_005498       | AP1M2       | adaptor-related protein complex 1, mu 2 subunit                                                | ENST00000250244 | -0,503000356 |
| A_33_P3728698 | AK127183        | FLJ45248    | FLJ45248 protein                                                                               |                 | -0,503037478 |
| A_33_P3333267 | NM_001204210    | TMEM235     | transmembrane protein 235                                                                      | ENST00000551068 | -0,503046231 |
| A_24_P941217  | ENST00000321276 | SGPP2       | sphingosine-1-phosphate phosphatase 2                                                          | ENST00000321276 | -0,503113855 |
| A_23_P109345  | NM_004339       | PTTG1IP     | pituitary tumor-transforming 1 interacting protein                                             | ENST00000330938 | -0,50311674  |
| A_21_P0010889 | NR_024397       | LOC728190   | uncharacterized LOC728190                                                                      | ENST00000451940 | -0,503175131 |
| A_33_P3237775 | NM_005693       | NR1H3       | nuclear receptor subfamily 1, group H, member 3                                                | ENST00000407404 | -0,503242942 |
| A_23_P312920  | NM_006235       | POU2AF1     | POU class 2 associating factor 1                                                               | ENST00000393067 | -0,503247263 |

|                |                   |                |                                                                    |                 |  |              |
|----------------|-------------------|----------------|--------------------------------------------------------------------|-----------------|--|--------------|
| A_21_P0011709  | TCONS_I2_0001268! | XLOC_I2_006812 |                                                                    |                 |  | -0,503323493 |
| A_23_P119337   | NM_012068         | ATF5           | activating transcription factor 5                                  | ENST00000423777 |  | -0,503338086 |
| A_33_P3738458  | NM_022648         | TNS1           | tensin 1                                                           | ENST00000171887 |  | -0,503367417 |
| A_21_P0005459  | NR_024394         | LOC154822      | uncharacterized LOC154822                                          |                 |  | -0,503384559 |
| A_21_P0005496  | TCONS_00013799    | XLOC_006439    |                                                                    |                 |  | -0,503400724 |
| A_21_P0005092  | ENST00000439703   | XLOC_005935    |                                                                    | ENST00000439703 |  | -0,503424503 |
| A_21_P0007150  | ENST00000447864   | XLOC_009338    |                                                                    | ENST00000447864 |  | -0,503460897 |
| A_21_P0006580  | THC2547329        | XLOC_008152    |                                                                    |                 |  | -0,503473597 |
| A_23_P103070   | NM_003405         | YWHAH          | tyrosine 3-monooxygenase/tryptophan 5-monooxygenase $\alpha$       | ENST00000248975 |  | -0,503497568 |
| A_24_P343233   | NM_002124         | HLA-DRB1       | major histocompatibility complex, class II, DR beta 1              | ENST00000549627 |  | -0,503681881 |
| A_23_P103070   | NM_003405         | YWHAH          | tyrosine 3-monooxygenase/tryptophan 5-monooxygenase $\alpha$       | ENST00000248975 |  | -0,503905479 |
| A_23_P116829   | NM_003348         | UBE2N          | ubiquitin-conjugating enzyme E2N                                   | ENST00000318066 |  | -0,503947242 |
| A_33_P3289865  | NM_006226         | PLCL1          | phospholipase C-like 1                                             | ENST00000437704 |  | -0,503953963 |
| A_19_P00320449 | BC038559          | LOC100506190   | uncharacterized LOC100506190                                       |                 |  | -0,503965799 |
| A_24_P399888   | NM_001002876      | CENPM          | centromere protein M                                               | ENST00000396437 |  | -0,503991635 |
| A_33_P3311439  | NM_001024071      | GCH1           | GTP cyclohydrolase 1                                               | ENST00000395524 |  | -0,504005141 |
| A_33_P3306823  | NM_001077624      | ZNF846         | zinc finger protein 846                                            | ENST00000397902 |  | -0,504041858 |
| A_23_P19020    | NM_005460         | SNCAIP         | synuclein, alpha interacting protein                               | ENST00000414317 |  | -0,504226237 |
| A_24_P365975   | NM_005202         | COL8A2         | collagen, type VIII, alpha 2                                       | ENST00000397799 |  | -0,504257816 |
| A_23_P10911    | NM_173542         | PLBD2          | phospholipase B domain containing 2                                | ENST00000280800 |  | -0,50429413  |
| A_33_P3292840  | NM_001003678      | C11orf49       | chromosome 11 open reading frame 49                                | ENST00000378618 |  | -0,504353823 |
| A_23_P86900    | NM_006876         | B3GNT1         | UDP-GlcNAc:betaGal beta-1,3-N-acetylglucosaminyltransferase I      | ENST00000311181 |  | -0,50440767  |
| A_24_P343233   | NM_002124         | HLA-DRB1       | major histocompatibility complex, class II, DR beta 1              | ENST00000549627 |  | -0,504509636 |
| A_23_P35467    | NM_018464         | CISD1          | CDGSH iron sulfur domain 1                                         | ENST00000464703 |  | -0,504558082 |
| A_33_P3227345  | NM_054014         | FKBP1A         | FK506 binding protein 1A, 12kDa                                    | ENST00000356170 |  | -0,504564835 |
| A_23_P115645   | NM_001025076      | CELF2          | CUGBP, Elav-like family member 2                                   | ENST00000537122 |  | -0,504610314 |
| A_24_P159948   | NM_003224         | ARFRP1         | ADP-ribosylation factor related protein 1                          | ENST00000303260 |  | -0,504688228 |
| A_24_P794648   | NR_001574         | RBMV2EP        | RNA binding motif protein, Y-linked, family 2, member E pseudogene | ENST00000444169 |  | -0,504741968 |
| A_21_P0014594  | XR_110451         | LOC100505820   | uncharacterized LOC100505820                                       | ENST00000411906 |  | -0,50474353  |

|               |                 |                |                                                                        |                 |              |
|---------------|-----------------|----------------|------------------------------------------------------------------------|-----------------|--------------|
| A_33_P3240532 | NM_015149       | RGL1           | ral guanine nucleotide dissociation stimulator-like 1                  | ENST00000367531 | -0,504845791 |
| A_23_P32404   | NM_002201       | ISG20          | interferon stimulated exonuclease gene 20kDa                           | ENST00000546338 | -0,504886104 |
| A_23_P67042   | NM_017947       | MOCOS          | molybdenum cofactor sulfurase                                          | ENST00000261326 | -0,504940081 |
| A_23_P62999   | NM_004455       | EXTL1          | exostoses (multiple)-like 1                                            | ENST00000374280 | -0,50515495  |
| A_21_P0003102 | TCONS_00006442  | XLOC_003048    |                                                                        |                 | -0,505181632 |
| A_23_P122052  | NM_001008397    | GPX8           | glutathione peroxidase 8 (putative)                                    | ENST00000503787 | -0,505281535 |
| A_23_P216655  | NM_014788       | TRIM14         | tripartite motif containing 14                                         | ENST00000341469 | -0,505386816 |
| A_24_P364807  | NM_017839       | LPCAT2         | lysophosphatidylcholine acyltransferase 2                              | ENST00000262134 | -0,505441205 |
| A_23_P103486  | NM_000775       | CYP2J2         | cytochrome P450, family 2, subfamily J, polypeptide 2                  | ENST00000469406 | -0,505453399 |
| A_23_P203900  | NM_005505       | SCARB1         | scavenger receptor class B, member 1                                   | ENST00000376788 | -0,505476955 |
| A_33_P3265189 | NM_001942       | DSG1           | desmoglein 1                                                           |                 | -0,505504692 |
| A_33_P3272563 | NM_004808       | NMT2           | N-myristoyltransferase 2                                               |                 | -0,505544183 |
| A_33_P3390950 | AK125852        | LOC100128338   | uncharacterized LOC100128338                                           |                 | -0,505669095 |
| A_21_P0011950 | ENST00000451884 | XLOC_I2_008203 |                                                                        | ENST00000451884 | -0,505669652 |
| A_23_P117274  | NM_005932       | MIPEP          | mitochondrial intermediate peptidase                                   | ENST00000382172 | -0,50571207  |
| A_23_P105862  | NM_023037       | FRY            | furry homolog (Drosophila)                                             | ENST00000380257 | -0,505776704 |
| A_33_P3261173 | NM_005479       | FRAT1          | frequently rearranged in advanced T-cell lymphomas                     | ENST00000490980 | -0,505899524 |
| A_23_P122077  | NM_016591       | GCNT4          | glucosaminyl (N-acetyl) transferase 4, core 2                          | ENST00000322348 | -0,505922104 |
| A_23_P215832  | NM_004889       | ATP5J2         | ATP synthase, H <sup>+</sup> transporting, mitochondrial Fo complex, s | ENST00000394186 | -0,505927668 |
| A_24_P65121   | NM_001040655    | TTC23          | tetratricopeptide repeat domain 23                                     | ENST00000394130 | -0,505955922 |
| A_24_P347378  | NM_001629       | ALOX5AP        | arachidonate 5-lipoxygenase-activating protein                         | ENST00000380490 | -0,506011341 |
| A_21_P0007740 | BF674433        | XLOC_010152    |                                                                        |                 | -0,506096878 |
| A_24_P192262  | NM_005402       | RALA           | v-ral simian leukemia viral oncogene homolog A (ras related)           | ENST00000005257 | -0,506152876 |
| A_21_P0006646 | ENST00000414631 | XLOC_008378    |                                                                        | ENST00000414631 | -0,506226698 |
| A_23_P99661   | NM_018071       | ARHGEF40       | Rho guanine nucleotide exchange factor (GEF) 40                        | ENST00000553709 | -0,506349702 |
| A_21_P0008842 | TCONS_00024034  | XLOC_011397    |                                                                        |                 | -0,506369949 |
| A_21_P0012033 | ENST00000416361 | XLOC_I2_007644 |                                                                        | ENST00000416361 | -0,50643039  |
| A_23_P328022  | NM_152351       | SLC5A10        | solute carrier family 5 (sodium/glucose cotransporter), member 10      | ENST00000395642 | -0,506448686 |
| A_33_P3314659 | NM_144722       | SPEF2          | sperm flagellar 2                                                      | ENST00000282469 | -0,506515198 |

|                |                  |                |                                                             |                 |              |
|----------------|------------------|----------------|-------------------------------------------------------------|-----------------|--------------|
| A_33_P3326634  | NM_001164617     | GPC3           | glypican 3                                                  | ENST00000394299 | -0,506524591 |
| A_23_P103864   | NM_024525        | TTC13          | tetratricopeptide repeat domain 13                          | ENST00000414259 | -0,506554634 |
| A_23_P38427    | NM_032932        | RAB11FIP4      | RAB11 family interacting protein 4 (class II)               | ENST00000325874 | -0,506600337 |
| A_33_P3413038  | NM_001163257     | PLXNB3         | plexin B3                                                   | ENST00000538776 | -0,50661442  |
| A_33_P3287502  | NM_000251        | MSH2           | mutS homolog 2, colon cancer, nonpolyposis type 1 (E. coli) | ENST00000419559 | -0,506626582 |
| A_23_P361773   | NM_001760        | CCND3          | cyclin D3                                                   | ENST00000414200 | -0,506710423 |
| A_23_P132277   | NM_006739        | MCM5           | minichromosome maintenance complex component 5              | ENST00000455261 | -0,506758646 |
| A_23_P135769   | NM_001101        | ACTB           | actin, beta                                                 | ENST00000445914 | -0,506842862 |
| A_23_P63390    | NM_001017986     | FCGR1B         | Fc fragment of IgG, high affinity Ib, receptor (CD64)       | ENST00000444948 | -0,506867735 |
| A_21_P0002977  | BX106648         | XLOC_002707    |                                                             |                 | -0,50692839  |
| A_24_P363278   | NM_005906        | MAK            | male germ cell-associated kinase                            | ENST00000313243 | -0,506949786 |
| A_24_P59111    | BC035912         | DPP6           | dipeptidyl-peptidase 6                                      | ENST00000406326 | -0,507011256 |
| A_33_P3294277  | NM_000896        | CYP4F3         | cytochrome P450, family 4, subfamily F, polypeptide 3       | ENST00000221307 | -0,507173209 |
| A_19_P00321839 | ENST00000417957  | XLOC_014200    |                                                             | ENST00000417957 | -0,507198475 |
| A_33_P3240512  | NM_138444        | KCTD12         | potassium channel tetramerisation domain containing 12      | ENST00000377474 | -0,507257016 |
| A_21_P0013543  | NR_045117        | DDX11L10       | DEAD/H (Asp-Glu-Ala-Asp/His) box polypeptide 11 like 10     | ENST00000545636 | -0,507283372 |
| A_24_P44462    | NM_000366        | TPM1           | tropomyosin 1 (alpha)                                       | ENST00000317516 | -0,507300174 |
| A_23_P65230    | NM_032813        | TMTC4          | transmembrane and tetratricopeptide repeat containing 4     | ENST00000342624 | -0,507347265 |
| A_23_P133770   | NM_138493        | CCDC167        | coiled-coil domain containing 167                           | ENST00000373408 | -0,507376931 |
| A_21_P0010970  | TCONS_I2_0000447 | XLOC_I2_002281 |                                                             |                 | -0,507414948 |
| A_32_P137939   | NM_001101        | ACTB           | actin, beta                                                 | ENST00000462494 | -0,507447272 |
| A_23_P256835   | NM_016030        | TTC15          | tetratricopeptide repeat domain 15                          | ENST00000437733 | -0,507466638 |
| A_21_P0004136  | ENST00000515199  | XLOC_004859    |                                                             | ENST00000515199 | -0,507510113 |
| A_23_P63032    | NM_007102        | GUCA2B         | guanylate cyclase activator 2B (uroguanylin)                | ENST00000372581 | -0,507681949 |
| A_23_P415395   | NM_145208        | MBD3L1         | methyl-CpG binding domain protein 3-like 1                  | ENST00000305625 | -0,507735099 |
| A_23_P103720   | NM_024758        | AGMAT          | agmatine ureohydrolase (agmatinase)                         | ENST00000375826 | -0,507794176 |
| A_23_P120860   | NM_003634        | NIPSNAP1       | nipsnap homolog 1 (C. elegans)                              | ENST00000216121 | -0,507845343 |
| A_21_P0010894  | TCONS_I2_0000369 | XLOC_I2_002049 |                                                             |                 | -0,507854522 |
| A_33_P3386429  | NM_015571        | SENPA6         | SUMO1/sentrin specific peptidase 6                          | ENST00000447266 | -0,507867445 |



|               |                 |                |                                                                                            |                 |              |
|---------------|-----------------|----------------|--------------------------------------------------------------------------------------------|-----------------|--------------|
| A_21_P0014011 | XM_003403458    | LOC100507419   | uncharacterized LOC100507419                                                               |                 | -0,50795507  |
| A_33_P3422133 | NM_006869       | ADAP1          | ArfGAP with dual PH domains 1                                                              | ENST00000495809 | -0,507961871 |
| A_24_P32085   | NM_024761       | MOB3B          | MOB kinase activator 3B                                                                    | ENST00000262244 | -0,507973825 |
| A_23_P115091  | NM_020387       | RAB25          | RAB25, member RAS oncogene family                                                          | ENST00000497968 | -0,508012325 |
| A_33_P3419165 | NM_013342       | TFPT           | TCF3 (E2A) fusion partner (in childhood Leukemia)                                          | ENST00000391759 | -0,508084192 |
| A_21_P0012056 | ENST00000436187 | XLOC_I2_007884 |                                                                                            | ENST00000436187 | -0,508123085 |
| A_21_P0002615 | ENST00000427615 | XLOC_001707    |                                                                                            | ENST00000427615 | -0,508181234 |
| A_33_P3369452 | NM_152906       | C22orf25       | chromosome 22 open reading frame 25                                                        | ENST00000399807 | -0,508382869 |
| A_23_P146233  | NM_000237       | LPL            | lipoprotein lipase                                                                         | ENST00000311322 | -0,508400596 |
| A_21_P0006673 | AK094093        | XLOC_008465    |                                                                                            | ENST00000421320 | -0,508427363 |
| A_23_P309739  | NM_000125       | ESR1           | estrogen receptor 1                                                                        | ENST00000206249 | -0,508563913 |
| A_23_P119337  | NM_012068       | ATF5           | activating transcription factor 5                                                          | ENST00000423777 | -0,508579934 |
| A_21_P0008396 | TCONS_00022640  | XLOC_010942    |                                                                                            |                 | -0,508602686 |
| A_21_P0006270 | ENST00000377547 | XLOC_007698    |                                                                                            | ENST00000377547 | -0,50864251  |
| A_23_P11543   | NM_000147       | FUCA1          | fucosidase, alpha-L- 1, tissue                                                             | ENST00000374479 | -0,508782386 |
| A_21_P0009452 | TCONS_00026275  | XLOC_012622    |                                                                                            |                 | -0,508833642 |
| A_23_P202837  | NM_053056       | CCND1          | cyclin D1                                                                                  | ENST00000227507 | -0,508877187 |
| A_24_P297539  | NM_181803       | UBE2C          | ubiquitin-conjugating enzyme E2C                                                           | ENST00000405520 | -0,508951147 |
| A_33_P3433873 | NM_017975       | ZWILCH         | Zwilch, kinetochore associated, homolog (Drosophila)                                       | ENST00000446801 | -0,509035914 |
| A_23_P259594  | NM_016377       | AKAP7          | A kinase (PRKA) anchor protein 7                                                           | ENST00000342266 | -0,509123067 |
| A_23_P103070  | NM_003405       | YWHAH          | tyrosine 3-monooxygenase/tryptophan 5-monooxygenase $\alpha$                               | ENST00000248975 | -0,509186638 |
| A_23_P117082  | NM_015987       | HEBP1          | heme binding protein 1                                                                     | ENST00000014930 | -0,50920896  |
| A_23_P420293  | NM_145013       | C11orf45       | chromosome 11 open reading frame 45                                                        | ENST00000310799 | -0,509238483 |
| A_23_P8185    | NM_006519       | DYNLT1         | dynein, light chain, Tctex-type 1                                                          | ENST00000367088 | -0,509321613 |
| A_21_P0006012 | ENST00000445963 | XLOC_007370    |                                                                                            | ENST00000445963 | -0,509323703 |
| A_21_P0002923 | ENST00000441644 | XLOC_003399    |                                                                                            | ENST00000441644 | -0,509413597 |
| A_23_P200222  | NM_033300       | LRP8           | low density lipoprotein receptor-related protein 8, apolipoprotein receptor type 1B-like 8 | ENST00000306052 | -0,509429742 |
| A_33_P3252834 | NM_012396       | PHLDA3         | pleckstrin homology-like domain, family A, member 3                                        | ENST00000367309 | -0,509502324 |
| A_23_P115202  | NM_016190       | CRNN           | cornulin                                                                                   | ENST00000271835 | -0,509576146 |

|                |                  |                |                                                               |                 |              |
|----------------|------------------|----------------|---------------------------------------------------------------|-----------------|--------------|
| A_24_P11315    | NM_020190        | OLFML3         | olfactomedin-like 3                                           | ENST00000393300 | -0,509610685 |
| A_32_P158355   | NM_001015050     | ALG1L          | asparagine-linked glycosylation 1-like                        | ENST00000532875 | -0,509641565 |
| A_23_P324538   | NM_178433        | LCE3B          | late cornified envelope 3B                                    | ENST00000335633 | -0,509661754 |
| A_23_P8571     | NM_080744        | SRCRB4D        | scavenger receptor cysteine rich domain containing, group     | ENST00000275560 | -0,509676046 |
| A_33_P3271657  | NM_001127258     | HHIPL1         | HHIP-like 1                                                   | ENST00000330710 | -0,509685497 |
| A_23_P252740   | NM_024094        | DSCC1          | defective in sister chromatid cohesion 1 homolog (S. cerevis) | ENST00000313655 | -0,50993759  |
| A_23_P26810    | NM_000546        | TP53           | tumor protein p53                                             | ENST00000396473 | -0,50994106  |
| A_24_P343233   | NM_002124        | HLA-DRB1       | major histocompatibility complex, class II, DR beta 1         | ENST00000549627 | -0,509961786 |
| A_23_P79622    | NM_181342        | FKBP7          | FK506 binding protein 7                                       | ENST00000434643 | -0,50996822  |
| A_23_P412321   | NM_000579        | CCR5           | chemokine (C-C motif) receptor 5                              | ENST00000343801 | -0,509973447 |
| A_21_P0006148  | TCONS_00015989   | XLOC_007368    |                                                               |                 | -0,510014357 |
| A_32_P29954    | NR_033387        | ADARB2-AS1     | ADARB2 antisense RNA 1 (non-protein coding)                   | ENST00000421697 | -0,510059704 |
| A_19_P00801649 | XR_132670        | LOC100652730   | uncharacterized LOC100652730                                  | ENST00000412500 | -0,510059781 |
| A_21_P0014724  | XR_112814        | LOC100507336   | uncharacterized LOC100507336                                  |                 | -0,510064568 |
| A_23_P160154   | NM_000403        | GALE           | UDP-galactose-4-epimerase                                     | ENST00000418277 | -0,510111195 |
| A_33_P3660204  | NR_037895        | LOC340073      | uncharacterized LOC340073                                     | ENST00000505663 | -0,510209152 |
| A_21_P0013600  | ENST00000455981  | XLOC_I2_015033 |                                                               | ENST00000455981 | -0,510323327 |
| A_33_P3414964  | BC029496         | PTPRS          | protein tyrosine phosphatase, receptor type, S                |                 | -0,510345078 |
| A_23_P11543    | NM_000147        | FUCA1          | fucosidase, alpha-L- 1, tissue                                | ENST00000374479 | -0,510522891 |
| A_21_P0011493  | BC160930         | XLOC_I2_005606 |                                                               |                 | -0,510545725 |
| A_21_P0010605  | TCONS_I2_0000107 | XLOC_I2_000804 |                                                               |                 | -0,510577715 |
| A_23_P117727   | NM_139242        | MTFMT          | mitochondrial methionyl-tRNA formyltransferase                | ENST00000220058 | -0,510584741 |
| A_23_P47565    | NM_005566        | LDHA           | lactate dehydrogenase A                                       | ENST00000445376 | -0,510632541 |
| A_32_P138042   | XR_132684        | LOC100652805   | uncharacterized LOC100652805                                  |                 | -0,510657804 |
| A_23_P74252    | NR_023918        | LINC00339      | long intergenic non-protein coding RNA 339                    |                 | -0,510672259 |
| A_33_P3222424  | NM_000759        | CSF3           | colony stimulating factor 3 (granulocyte)                     | ENST00000394148 | -0,510733468 |
| A_23_P106389   | NM_003612        | SEMA7A         | semaphorin 7A, GPI membrane anchor (John Milton Hagen         | ENST00000543145 | -0,510758477 |
| A_24_P147461   | NM_001031848     | SERPINB8       | serpin peptidase inhibitor, clade B (ovalbumin), member 8     | ENST00000481726 | -0,510864826 |
| A_33_P3269208  | NM_001001850     | STX19          | syntaxin 19                                                   | ENST00000315099 | -0,510907539 |

|                |                  |                |                                                             |                 |              |
|----------------|------------------|----------------|-------------------------------------------------------------|-----------------|--------------|
| A_23_P416711   | NM_152996        | ST6GALNAC3     | ST6 (alpha-N-acetyl-neuraminyl-2,3-beta-galactosyl-1,3)-N-  | ENST00000328299 | -0,510999301 |
| A_23_P329870   | NM_024599        | RHBDF2         | rhomboid 5 homolog 2 (Drosophila)                           | ENST00000313080 | -0,511052455 |
| A_19_P00316602 | NR_015364        | LOC441204      | uncharacterized LOC441204                                   |                 | -0,511075227 |
| A_23_P10305    | NM_175859        | CTPS2          | CTP synthase II                                             | ENST00000380207 | -0,51113546  |
| A_23_P412321   | NM_000579        | CCR5           | chemokine (C-C motif) receptor 5                            | ENST00000343801 | -0,511158645 |
| A_23_P117852   | NM_014736        | KIAA0101       | KIAA0101                                                    | ENST00000380258 | -0,511255423 |
| A_24_P319613   | NM_002497        | NEK2           | NIMA (never in mitosis gene a)-related kinase 2             | ENST00000489633 | -0,51130481  |
| A_33_P3417150  | NM_002563        | P2RY1          | purinergic receptor P2Y, G-protein coupled, 1               | ENST00000305097 | -0,511382177 |
| A_33_P3331916  | XR_132736        | LOC440132      | hCG1815504                                                  | ENST00000440633 | -0,511523485 |
| A_21_P0002042  | ENST00000438736  | XLOC_002069    |                                                             | ENST00000438736 | -0,511540546 |
| A_21_P0012272  | TCONS_I2_0001783 | XLOC_I2_009439 |                                                             |                 | -0,511805441 |
| A_23_P168551   | NM_001040661     | SLC29A4        | solute carrier family 29 (nucleoside transporters), member  | ENST00000439491 | -0,511808026 |
| A_24_P353794   | NM_004481        | GALNT2         | UDP-N-acetyl-alpha-D-galactosamine:polypeptide N-acetylgl   | ENST00000485438 | -0,511836053 |
| A_33_P3354678  | NR_002777        | TRIM78P        | tripartite motif containing 78, pseudogene                  |                 | -0,511881162 |
| A_24_P175563   | NM_145698        | ACBD5          | acyl-CoA binding domain containing 5                        | ENST00000396271 | -0,51193989  |
| A_33_P3305250  | ENST00000373920  | PSMD5          | proteasome (prosome, macropain) 26S subunit, non-ATPase     | ENST00000373920 | -0,511962143 |
| A_23_P114095   | NM_015884        | MBTPS2         | membrane-bound transcription factor peptidase, site 2       | ENST00000379484 | -0,512099777 |
| A_21_P0010622  | TCONS_I2_0000127 | XLOC_I2_000941 |                                                             |                 | -0,512140188 |
| A_33_P3297244  | NM_139285        | GAS2L2         | growth arrest-specific 2 like 2                             | ENST00000359507 | -0,512177723 |
| A_33_P3333627  | NM_030948        | PHACTR1        | phosphatase and actin regulator 1                           | ENST00000406205 | -0,512212501 |
| A_23_P135769   | NM_001101        | ACTB           | actin, beta                                                 | ENST00000445914 | -0,512300902 |
| A_21_P0014169  | XR_108681        | LOC100506828   |                                                             |                 | -0,512323869 |
| A_23_P406350   | NM_138431        | MFSD3          | major facilitator superfamily domain containing 3           | ENST00000301327 | -0,512424273 |
| A_21_P0008076  | TCONS_00021816   | XLOC_010416    |                                                             |                 | -0,512448354 |
| A_21_P0000662  | NR_036537        | LOC100131320   | uncharacterized LOC100131320                                | ENST00000412425 | -0,512498458 |
| A_33_P3209476  | NM_031443        | CCM2           | cerebral cavernous malformation 2                           | ENST00000541586 | -0,512509002 |
| A_33_P3420680  | NM_006161        | NEUROG1        | neurogenin 1                                                | ENST00000314744 | -0,512548198 |
| A_24_P288298   | NM_002255        | KIR2DL4        | killer cell immunoglobulin-like receptor, two domains, long | ENST00000396293 | -0,512558759 |
| A_33_P3416946  | NM_018477        | ACTR10         | actin-related protein 10 homolog (S. cerevisiae)            |                 | -0,512563879 |

|                |                  |                |                                                                |                 |              |
|----------------|------------------|----------------|----------------------------------------------------------------|-----------------|--------------|
| A_33_P3376321  | NM_020477        | ANK1           | ankyrin 1, erythrocytic                                        | ENST00000358820 | -0,51258171  |
| A_33_P3316983  | NM_001195304     | BBIP1          | BBSome interacting protein 1                                   | ENST00000398289 | -0,512646737 |
| A_33_P3265309  | NM_001817        | CEACAM4        | carcinoembryonic antigen-related cell adhesion molecule 4      | ENST00000221954 | -0,512700428 |
| A_19_P00807743 | THC2734315       | XLOC_I2_010751 |                                                                |                 | -0,51278562  |
| A_23_P412321   | NM_000579        | CCR5           | chemokine (C-C motif) receptor 5                               | ENST00000343801 | -0,512820076 |
| A_19_P00317965 | THC2614488       | Q29HP5         |                                                                |                 | -0,512829448 |
| A_23_P149084   | NM_000831        | GRIK3          | glutamate receptor, ionotropic, kainate 3                      | ENST00000373093 | -0,512976637 |
| A_24_P33156    | NM_001010982     | AFMID          | arylformamidase                                                | ENST00000473128 | -0,513011883 |
| A_19_P00320749 | NR_003367        | PVT1           |                                                                |                 | -0,513027955 |
| A_23_P408930   | NR_027688        | OR7E5P         | olfactory receptor, family 7, subfamily E, member 5 pseudogene |                 | -0,513081945 |
| A_23_P96641    | NM_001039091     | PRPS2          | phosphoribosyl pyrophosphate synthetase 2                      | ENST00000460102 | -0,513204589 |
| A_24_P911094   | ENST00000376439  | RABL2A         | RAB, member of RAS oncogene family-like 2A                     | ENST00000376439 | -0,513208649 |
| A_23_P151294   | NM_000619        | IFNG           | interferon, gamma                                              | ENST00000229135 | -0,513248583 |
| A_23_P120860   | NM_003634        | NIPSNAP1       | nipsnap homolog 1 (C. elegans)                                 | ENST00000216121 | -0,513300256 |
| A_23_P109593   | NM_014346        | TBC1D22A       | TBC1 domain family, member 22A                                 | ENST00000355704 | -0,513391116 |
| A_23_P103070   | NM_003405        | YWHAH          | tyrosine 3-monooxygenase/tryptophan 5-monooxygenase 2          | ENST00000248975 | -0,51341362  |
| A_23_P10305    | NM_175859        | CTPS2          | CTP synthase II                                                | ENST00000380207 | -0,513415543 |
| A_21_P0000606  | NR_033833        | LOC283688      | uncharacterized LOC283688                                      |                 | -0,513482653 |
| A_23_P122077   | NM_016591        | GCNT4          | glucosaminyl (N-acetyl) transferase 4, core 2                  | ENST00000322348 | -0,513547492 |
| A_23_P74349    | NM_145697        | NUF2           | NUF2, NDC80 kinetochore complex component, homolog 5           | ENST00000271452 | -0,513571269 |
| A_23_P90732    | NM_001077399     | PNKD           | paroxysmal nonkinesigenic dyskinesia                           | ENST00000469689 | -0,51365063  |
| A_33_P3282489  | NM_001097634     | GCNT1          | glucosaminyl (N-acetyl) transferase 1, core 2                  | ENST00000442371 | -0,513796    |
| A_21_P0010999  | TCONS_I2_0000477 | XLOC_I2_002477 |                                                                |                 | -0,513993979 |
| A_21_P0011677  | TCONS_I2_0001235 | XLOC_I2_006624 |                                                                |                 | -0,514001128 |
| A_23_P11543    | NM_000147        | FUCA1          | fucosidase, alpha-L- 1, tissue                                 | ENST00000374479 | -0,514003681 |
| A_23_P412321   | NM_000579        | CCR5           | chemokine (C-C motif) receptor 5                               | ENST00000343801 | -0,514018904 |
| A_33_P3440636  | AK091759         | LOC286071      | uncharacterized LOC286071                                      |                 | -0,51411802  |
| A_23_P116898   | NM_000014        | A2M            | alpha-2-macroglobulin                                          | ENST00000540099 | -0,51414718  |
| A_23_P138541   | NM_003739        | AKR1C3         | aldo-keto reductase family 1, member C3 (3-alpha hydroxys      | ENST00000439082 | -0,514246646 |

|                |                  |                |                                                                                     |                 |              |
|----------------|------------------|----------------|-------------------------------------------------------------------------------------|-----------------|--------------|
| A_33_P3215768  | NM_007210        | GALNT6         | UDP-N-acetyl-alpha-D-galactosamine:polypeptide N-acetylglucosyltransferase 6        | ENST00000356317 | -0,51432251  |
| A_23_P162861   | NM_001101320     | SERPINE3       | serpin peptidase inhibitor, clade E (nexin, plasminogen activator inhibitor type 3) | ENST00000400389 | -0,51441136  |
| A_23_P40821    | NM_032383        | HPS3           | Hermansky-Pudlak syndrome 3                                                         | ENST00000460822 | -0,514425398 |
| A_23_P148446   | NM_003336        | UBE2A          | ubiquitin-conjugating enzyme E2A                                                    | ENST00000371569 | -0,514455432 |
| A_33_P3296240  | NM_017738        | CNTLN          | centlein, centrosomal protein                                                       | ENST00000262360 | -0,514508054 |
| A_21_P0010469  | BQ706985         | LOC100144603   | uncharacterized transcript                                                          |                 | -0,514718343 |
| A_23_P11543    | NM_000147        | FUCA1          | fucosidase, alpha-L- 1, tissue                                                      | ENST00000374479 | -0,514930888 |
| A_23_P104025   | NM_052965        | TSEN15         | tRNA splicing endonuclease 15 homolog (S. cerevisiae)                               | ENST00000462677 | -0,515067579 |
| A_21_P0007675  | TCONS_00020666   | XLOC_009969    |                                                                                     |                 | -0,515091211 |
| A_21_P0005999  | ENST00000442260  | XLOC_007286    |                                                                                     | ENST00000442260 | -0,515185171 |
| A_23_P203920   | NM_005086        | SSPN           | sarcospan (Kras oncogene-associated gene)                                           | ENST00000422622 | -0,515222607 |
| A_23_P103486   | NM_000775        | CYP2J2         | cytochrome P450, family 2, subfamily J, polypeptide 2                               | ENST00000469406 | -0,515262939 |
| A_21_P0010167  | ENST00000411956  | XLOC_013966    |                                                                                     | ENST00000411956 | -0,515324864 |
| A_21_P0003318  | BC027846         | XLOC_003603    |                                                                                     |                 | -0,515419116 |
| A_33_P3382606  | NM_207102        | FBXW12         | F-box and WD repeat domain containing 12                                            | ENST00000296438 | -0,515716659 |
| A_33_P3249072  | ENST00000370642  | HOGA1          | 4-hydroxy-2-oxoglutarate aldolase 1                                                 | ENST00000370642 | -0,515731484 |
| A_23_P52017    | NM_018136        | ASPM           | asp (abnormal spindle) homolog, microcephaly associated (mouse)                     | ENST00000367408 | -0,515736957 |
| A_21_P0014529  | XR_110216        | LOC100506245   | uncharacterized LOC100506245                                                        |                 | -0,515779234 |
| A_24_P64126    | NM_003909        | CPNE3          | copine III                                                                          | ENST00000517490 | -0,515803796 |
| A_23_P92441    | NM_002358        | MAD2L1         | MAD2 mitotic arrest deficient-like 1 (yeast)                                        | ENST00000504707 | -0,515804442 |
| A_33_P3228305  | NM_015071        | ARHGAP26       | Rho GTPase activating protein 26                                                    | ENST00000378004 | -0,515875016 |
| A_33_P3297978  | NM_004998        | MYO1E          | myosin IE                                                                           | ENST00000288235 | -0,516056693 |
| A_21_P0000015  | NM_001146106     | PARP9          | poly (ADP-ribose) polymerase family, member 9                                       | ENST00000462315 | -0,516266019 |
| A_23_P111311   | NM_144497        | AKAP12         | A kinase (PRKA) anchor protein 12                                                   | ENST00000253332 | -0,516276067 |
| A_21_P0003448  | ENST00000507932  | XLOC_003890    |                                                                                     | ENST00000507932 | -0,516308627 |
| A_24_P162979   | NM_024933        | ANKRD53        | ankyrin repeat domain 53                                                            | ENST00000272421 | -0,516353339 |
| A_19_P00320275 | ENST00000498732  | XLOC_008079    |                                                                                     | ENST00000498732 | -0,516483599 |
| A_23_P135769   | NM_001101        | ACTB           | actin, beta                                                                         | ENST00000445914 | -0,516685282 |
| A_21_P0010829  | TCONS_I2_0000305 | XLOC_I2_001597 |                                                                                     |                 | -0,516691943 |



|               |                  |                |                                                                        |                 |              |
|---------------|------------------|----------------|------------------------------------------------------------------------|-----------------|--------------|
| A_24_P413988  | NM_006464        | TGOLN2         | trans-golgi network protein 2                                          | ENST00000377386 | -0,516830723 |
| A_33_P3247858 | NM_001166461     | MPP1           | membrane protein, palmitoylated 1, 55kDa                               | ENST00000488694 | -0,516871917 |
| A_23_P63655   | NM_005174        | ATP5C1         | ATP synthase, H <sup>+</sup> transporting, mitochondrial F1 complex, g | ENST00000460820 | -0,516961438 |
| A_21_P0012673 | NM_015160        | PMPCA          | peptidase (mitochondrial processing) alpha                             | ENST00000444897 | -0,516988132 |
| A_24_P346762  | NM_025182        | KIAA1539       | KIAA1539                                                               | ENST00000479357 | -0,517105481 |
| A_23_P370625  | NM_020451        | SEPN1          | selenoprotein N, 1                                                     | ENST00000374315 | -0,517107996 |
| A_23_P103864  | NM_024525        | TTC13          | tetratricopeptide repeat domain 13                                     | ENST00000414259 | -0,517108539 |
| A_21_P0010535 | THC2520127       | XLOC_I2_000297 |                                                                        |                 | -0,517109187 |
| A_23_P124427  | NM_012224        | NEK1           | NIMA (never in mitosis gene a)-related kinase 1                        | ENST00000507142 | -0,517239683 |
| A_24_P343233  | NM_002124        | HLA-DRB1       | major histocompatibility complex, class II, DR beta 1                  | ENST00000549627 | -0,517365812 |
| A_23_P136355  | NM_018194        | HHAT           | hedgehog acyltransferase                                               | ENST00000367010 | -0,517387139 |
| A_33_P3339361 | NM_199357        | ARHGAP11A      | Rho GTPase activating protein 11A                                      |                 | -0,517399044 |
| A_23_P18119   | NM_016247        | IMPG2          | interphotoreceptor matrix proteoglycan 2                               | ENST00000193391 | -0,517411839 |
| A_23_P92727   | NM_015577        | RAI14          | retinoic acid induced 14                                               | ENST00000428746 | -0,517462122 |
| A_24_P134392  | NM_006948        | HSPA13         | heat shock protein 70kDa family, member 13                             | ENST00000285667 | -0,517528292 |
| A_23_P338479  | NM_014143        | CD274          | CD274 molecule                                                         | ENST00000381577 | -0,517710936 |
| A_23_P124417  | NM_004336        | BUB1           | budding uninhibited by benzimidazoles 1 homolog (yeast)                | ENST00000302759 | -0,51771469  |
| A_21_P0008704 | TCONS_00023572   | XLOC_011396    |                                                                        |                 | -0,517759019 |
| A_23_P122937  | NM_014800        | ELMO1          | engulfment and cell motility 1                                         | ENST00000396040 | -0,517767605 |
| A_21_P0003233 | TCONS_00006866   | XLOC_002675    |                                                                        |                 | -0,517852706 |
| A_21_P0011789 | TCONS_I2_0001343 | XLOC_I2_007176 |                                                                        |                 | -0,517965199 |
| A_23_P106362  | NM_020980        | AQP9           | aquaporin 9                                                            | ENST00000219919 | -0,517981855 |
| A_33_P3284463 | NM_177924        | ASAH1          | N-acylsphingosine amidohydrolase (acid ceramidase) 1                   | ENST00000417108 | -0,518008845 |
| A_23_P120860  | NM_003634        | NIPSNAP1       | nipsnap homolog 1 (C. elegans)                                         | ENST00000216121 | -0,518122534 |
| A_21_P0013652 | TCONS_I2_0002934 | XLOC_I2_015213 |                                                                        |                 | -0,518189531 |
| A_33_P3420224 | NM_001033113     | ENTPD8         | ectonucleoside triphosphate diphosphohydrolase 8                       | ENST00000461823 | -0,518191876 |
| A_21_P0014119 | ENST00000474250  | LOC100507239   |                                                                        | ENST00000474250 | -0,518238385 |
| A_21_P0005021 | NR_038989        | LOC100507584   | uncharacterized LOC100507584                                           | ENST00000506222 | -0,518250329 |
| A_23_P111701  | NM_004126        | GNG11          | guanine nucleotide binding protein (G protein), gamma 11               | ENST00000248564 | -0,518291094 |

|                |                                 |                |                                                             |                 |              |
|----------------|---------------------------------|----------------|-------------------------------------------------------------|-----------------|--------------|
| A_23_P30050    | NM_006345                       | SLC30A9        | solute carrier family 30 (zinc transporter), member 9       | ENST00000264451 | -0,518335208 |
| A_19_P00320614 | NR_033852                       | LOC283177      | uncharacterized LOC283177                                   | ENST00000532886 | -0,518361839 |
| A_21_P0011730  | TCONS_I2_0001294:XLOC_I2_006973 |                |                                                             |                 | -0,518462946 |
| A_19_P00317412 | NR_038842                       | LOC728431      | uncharacterized LOC728431                                   | ENST00000424989 | -0,518531381 |
| A_33_P3362143  | NR_026962                       | TTC28-AS1      | TTC28 antisense RNA 1 (non-protein coding)                  |                 | -0,518539378 |
| A_33_P3241831  | NM_005462                       | MAGEC1         | melanoma antigen family C, 1                                | ENST00000370511 | -0,518541324 |
| A_19_P00319553 | ENST00000424786                 | XLOC_002612    |                                                             | ENST00000424786 | -0,518613802 |
| A_24_P343233   | NM_002124                       | HLA-DRB1       | major histocompatibility complex, class II, DR beta 1       | ENST00000549627 | -0,518617732 |
| A_23_P30243    | NM_022350                       | ERAP2          | endoplasmic reticulum aminopeptidase 2                      | ENST00000379904 | -0,518661353 |
| A_21_P0010057  | TCONS_00028441                  | XLOC_013792    |                                                             |                 | -0,518674396 |
| A_21_P0012964  | ENST00000504512                 | XLOC_I2_011854 |                                                             | ENST00000504512 | -0,51872669  |
| A_23_P135769   | NM_001101                       | ACTB           | actin, beta                                                 | ENST00000445914 | -0,518783798 |
| A_23_P102471   | NM_000251                       | MSH2           | mutS homolog 2, colon cancer, nonpolyposis type 1 (E. coli) | ENST00000543555 | -0,51885528  |
| A_23_P14458    | NM_144581                       | C14orf149      | chromosome 14 open reading frame 149                        | ENST00000247194 | -0,518892172 |
| A_23_P155979   | NM_001963                       | EGF            | epidermal growth factor                                     | ENST00000544918 | -0,518917805 |
| A_23_P321703   | NM_004049                       | BCL2A1         | BCL2-related protein A1                                     | ENST00000485386 | -0,518960005 |
| A_23_P105862   | NM_023037                       | FRY            | furry homolog (Drosophila)                                  | ENST00000380257 | -0,518982323 |
| A_33_P3386965  | NM_145167                       | PIGM           | phosphatidylinositol glycan anchor biosynthesis, class M    | ENST00000368090 | -0,519018761 |
| A_33_P3389942  | NM_017838                       | NHP2           | NHP2 ribonucleoprotein homolog (yeast)                      | ENST00000274606 | -0,519057129 |
| A_23_P121480   | NM_001004196                    | CD200          | CD200 molecule                                              | ENST00000478595 | -0,519083179 |
| A_24_P304723   | NM_000942                       | PPIB           | peptidylprolyl isomerase B (cyclophilin B)                  | ENST00000300026 | -0,519134107 |
| A_23_P412321   | NM_000579                       | CCR5           | chemokine (C-C motif) receptor 5                            | ENST00000343801 | -0,519207606 |
| A_33_P3262977  | NM_001079858                    | GPR64          | G protein-coupled receptor 64                               | ENST00000397917 | -0,519216794 |
| A_23_P23765    | NM_014288                       | ITGB3BP        | integrin beta 3 binding protein (beta3-endonexin)           | ENST00000283568 | -0,519220482 |
| A_33_P3362353  | ENST00000377039                 | ARAF           | v-raf murine sarcoma 3611 viral oncogene homolog            | ENST00000377039 | -0,519239721 |
| A_33_P3334443  | NM_001252271                    | FAM69A         | family with sequence similarity 69, member A                | ENST00000370310 | -0,51927113  |
| A_21_P0014472  | XR_109972                       | SOS1-IT1       | SOS1 intronic transcript 1 (non-protein coding)             |                 | -0,519393128 |
| A_23_P315589   | NM_015264                       | KIAA0930       | KIAA0930                                                    | ENST00000488038 | -0,519405132 |
| A_33_P3260373  | NM_001204890                    | ISY1-RAB43     | ISY1-RAB43 readthrough                                      | ENST00000315150 | -0,519456784 |

|                |                 |                |                                                          |                 |              |
|----------------|-----------------|----------------|----------------------------------------------------------|-----------------|--------------|
| A_23_P412321   | NM_000579       | CCR5           | chemokine (C-C motif) receptor 5                         | ENST00000343801 | -0,519490142 |
| A_23_P122724   | NM_004665       | VNN2           | vanin 2                                                  | ENST00000392389 | -0,51953879  |
| A_23_P151075   | NM_001175       | ARHGDI1B       | Rho GDP dissociation inhibitor (GDI) beta                | ENST00000228945 | -0,519604523 |
| A_23_P122068   | NM_181435       | C1QTNF3        | C1q and tumor necrosis factor related protein 3          | ENST00000513471 | -0,519631437 |
| A_33_P3410724  | NM_003001       | SDHC           | succinate dehydrogenase complex, subunit C, integral mem | ENST00000513700 | -0,519676075 |
| A_23_P2492     | NM_001734       | C1S            | complement component 1, s subcomponent                   | ENST00000360817 | -0,519689474 |
| A_23_P336565   | NM_001145268    | FAM185A        | family with sequence similarity 185, member A            | ENST00000413034 | -0,519720719 |
| A_23_P135769   | NM_001101       | ACTB           | actin, beta                                              | ENST00000445914 | -0,51975595  |
| A_21_P0009740  | TCONS_00027198  | XLOC_013238    |                                                          |                 | -0,519812362 |
| A_32_P213661   | NM_144974       | CCDC122        | coiled-coil domain containing 122                        | ENST00000470137 | -0,51986557  |
| A_23_P114983   | NM_032588       | TRIM63         | tripartite motif containing 63                           | ENST00000374272 | -0,519919908 |
| A_19_P00317173 | THC2524841      | XLOC_I2_010723 |                                                          |                 | -0,519954315 |
| A_23_P255057   | NM_017945       | SLC35A5        | solute carrier family 35, member A5                      | ENST00000460713 | -0,519970924 |
| A_23_P10518    | NM_016521       | TFDP3          | transcription factor Dp family, member 3                 | ENST00000310125 | -0,520111125 |
| A_21_P0006733  | ENST00000457632 | XLOC_008721    |                                                          | ENST00000457632 | -0,52016445  |
| A_21_P0011578  | ENST00000399211 | XLOC_I2_006021 |                                                          | ENST00000399211 | -0,520191663 |
| A_23_P361569   | NM_025181       | SLC35F5        | solute carrier family 35, member F5                      | ENST00000245680 | -0,520402168 |
| A_32_P206698   | NM_001826       | CKS1B          | CDC28 protein kinase regulatory subunit 1B               | ENST00000308987 | -0,520406585 |
| A_23_P11697    | NM_145205       | HMGB4          | high mobility group box 4                                | ENST00000522796 | -0,52047348  |
| A_21_P0012102  | ENST00000417006 | XLOC_I2_008405 |                                                          | ENST00000417006 | -0,52058009  |
| A_24_P286054   | NM_001105251    | ZFYVE16        | zinc finger, FYVE domain containing 16                   | ENST00000512907 | -0,520722408 |
| A_23_P52806    | NM_012104       | BACE1          | beta-site APP-cleaving enzyme 1                          | ENST00000313005 | -0,520723552 |
| A_23_P146644   | NM_001002857    | ANXA2          | annexin A2                                               | ENST00000421017 | -0,520883887 |
| A_33_P3618561  | BC034282        | LOC730961      | uncharacterized LOC730961                                |                 | -0,52088503  |
| A_23_P429560   | NM_018984       | SSH1           | slingshot homolog 1 (Drosophila)                         | ENST00000546433 | -0,520966819 |
| A_23_P117852   | NM_014736       | KIAA0101       | KIAA0101                                                 | ENST00000380258 | -0,521080652 |
| A_21_P0007385  | TCONS_00019735  | XLOC_009527    |                                                          |                 | -0,521144659 |
| A_23_P212400   | NM_012191       | NAT6           | N-acetyltransferase 6 (GCN5-related)                     | ENST00000443842 | -0,521263217 |
| A_23_P11543    | NM_000147       | FUCA1          | fucosidase, alpha-L- 1, tissue                           | ENST00000374479 | -0,521279168 |

|                |                                  |             |                                                        |                 |              |
|----------------|----------------------------------|-------------|--------------------------------------------------------|-----------------|--------------|
| A_33_P3316683  | NM_152897                        | SNX21       | sorting nexin family member 21                         | ENST00000466252 | -0,521353084 |
| A_33_P3352307  | NM_002953                        | RPS6KA1     | ribosomal protein S6 kinase, 90kDa, polypeptide 1      | ENST00000530305 | -0,521363042 |
| A_23_P256107   | NM_006665                        | HPSE        | heparanase                                             | ENST00000507150 | -0,521417241 |
| A_24_P130363   | NM_181482                        | C18orf1     | chromosome 18 open reading frame 1                     | ENST00000359446 | -0,521496983 |
| A_33_P3396891  | NM_021732                        | AVPI1       | arginine vasopressin-induced 1                         | ENST00000370626 | -0,521632119 |
| A_23_P348749   | NM_145025                        | AKD1        | adenylate kinase domain containing 1                   | ENST00000285397 | -0,521656187 |
| A_33_P3242543  | NM_000240                        | MAOA        | monoamine oxidase A                                    | ENST00000338702 | -0,521726089 |
| A_23_P250644   | NM_080656                        | CDKN2AIPNL  | CDKN2A interacting protein N-terminal like             | ENST00000458198 | -0,521874937 |
| A_23_P109593   | NM_014346                        | TBC1D22A    | TBC1 domain family, member 22A                         | ENST00000355704 | -0,522084292 |
| A_33_P3315949  | NM_213607                        | CCDC103     | coiled-coil domain containing 103                      | ENST00000410006 | -0,52209195  |
| A_23_P112452   | NR_003191                        | GGTA1P      | glycoprotein, alpha-galactosyltransferase 1 pseudogene | ENST00000373793 | -0,522251499 |
| A_23_P111361   | NM_173672                        | PPIL6       | peptidylprolyl isomerase (cyclophilin)-like 6          | ENST00000521072 | -0,522538744 |
| A_23_P52031    | NM_002633                        | PGM1        | phosphoglucomutase 1                                   | ENST00000538673 | -0,522616458 |
| A_23_P161615   | NM_002689                        | POLA2       | polymerase (DNA directed), alpha 2 (70kD subunit)      | ENST00000541089 | -0,522739803 |
| A_33_P3214665  | NM_002374                        | MAP2        | microtubule-associated protein 2                       | ENST00000360351 | -0,522772305 |
| A_33_P3245278  | NM_002841                        | PTPRG       | protein tyrosine phosphatase, receptor type, G         | ENST00000474889 | -0,5228038   |
| A_24_P343233   | NM_002124                        | HLA-DRB1    | major histocompatibility complex, class II, DR beta 1  | ENST00000549627 | -0,522941606 |
| A_23_P205584   | NM_016475                        | JKAMP       | JNK1/MAPK8-associated membrane protein                 |                 | -0,52300465  |
| A_33_P3370787  | NM_004442                        | EPHB2       | EPH receptor B2                                        | ENST00000374625 | -0,523056279 |
| A_23_P115407   | NM_146421                        | GSTM1       | glutathione S-transferase mu 1                         | ENST00000489913 | -0,523057234 |
| A_19_P00808794 | TCONS_I2_0001484; XLOC_I2_008221 |             |                                                        |                 | -0,523157069 |
| A_23_P134454   | NM_001753                        | CAV1        | caveolin 1, caveolae protein, 22kDa                    | ENST00000341049 | -0,523202723 |
| A_33_P3321836  | NM_012401                        | PLXNB2      | plexin B2                                              | ENST00000399964 | -0,523322953 |
| A_33_P3238250  | NM_016946                        | F11R        | F11 receptor                                           | ENST00000335772 | -0,523405561 |
| A_21_P0009712  | BC034565                         | XLOC_013043 |                                                        |                 | -0,523460457 |
| A_23_P117852   | NM_014736                        | KIAA0101    | KIAA0101                                               | ENST00000380258 | -0,523462602 |
| A_21_P0006785  | ENST00000429420                  | XLOC_008919 |                                                        | ENST00000429420 | -0,523500066 |
| A_33_P3385785  | NM_005621                        | S100A12     | S100 calcium binding protein A12                       | ENST00000368736 | -0,523500749 |
| A_21_P0009415  | TCONS_00026158                   | XLOC_012572 |                                                        |                 | -0,523628648 |

|                |                  |                |                                                             |                 |              |
|----------------|------------------|----------------|-------------------------------------------------------------|-----------------|--------------|
| A_33_P3224946  | XR_108603        | FLJ46010       | FLJ46010 protein                                            |                 | -0,523641969 |
| A_23_P54968    | NM_018414        | ST6GALNAC1     | ST6 (alpha-N-acetyl-neuraminyl-2,3-beta-galactosyl-1,3)-N-  | ENST00000156626 | -0,52366381  |
| A_21_P0009734  | BC063630         | XLOC_013194    |                                                             |                 | -0,523740675 |
| A_23_P169576   | NM_019053        | EXOC6          | exocyst complex component 6                                 | ENST00000260762 | -0,523798565 |
| A_23_P122052   | NM_001008397     | GPX8           | glutathione peroxidase 8 (putative)                         | ENST00000503787 | -0,523929587 |
| A_23_P352266   | NM_000633        | BCL2           | B-cell CLL/lymphoma 2                                       | ENST00000398117 | -0,524053464 |
| A_33_P3386765  | NM_015407        | ABHD14A        | abhydrolase domain containing 14A                           | ENST00000273596 | -0,524071415 |
| A_33_P3483634  | NR_027108        | LOC285593      | uncharacterized LOC285593                                   | ENST00000517299 | -0,52412798  |
| A_33_P3337144  | NM_001033723     | ZNF704         | zinc finger protein 704                                     | ENST00000327835 | -0,524170344 |
| A_23_P51690    | NM_020407        | RHBG           | Rh family, B glycoprotein (gene/pseudogene)                 | ENST00000466013 | -0,524211616 |
| A_32_P40596    | NM_001204269     | KCNA2          | potassium voltage-gated channel, shaker-related subfamily,  | ENST00000369770 | -0,524296664 |
| A_32_P55241    | NM_001007538     | SHISA2         | shisa homolog 2 ( <i>Xenopus laevis</i> )                   | ENST00000319420 | -0,524299449 |
| A_33_P3312119  | NM_001195032     | C6orf99        | chromosome 6 open reading frame 99                          | ENST00000367072 | -0,524314751 |
| A_21_P0012157  | AL929474         | XLOC_I2_008692 |                                                             |                 | -0,524362627 |
| A_19_P00316238 | NM_001145454     | STMN1          | stathmin 1                                                  | ENST00000513116 | -0,524384317 |
| A_19_P00802450 | TCONS_I2_0002906 | XLOC_I2_015037 |                                                             |                 | -0,524531604 |
| A_23_P7873     | NM_002388        | MCM3           | minichromosome maintenance complex component 3              | ENST00000340349 | -0,524552437 |
| A_23_P111701   | NM_004126        | GNG11          | guanine nucleotide binding protein (G protein), gamma 11    | ENST00000248564 | -0,524615774 |
| A_23_P103864   | NM_024525        | TTC13          | tetratricopeptide repeat domain 13                          | ENST00000414259 | -0,5246301   |
| A_23_P202837   | NM_053056        | CCND1          | cyclin D1                                                   | ENST00000227507 | -0,524654325 |
| A_23_P116898   | NM_000014        | A2M            | alpha-2-macroglobulin                                       | ENST00000540099 | -0,524988303 |
| A_23_P135769   | NM_001101        | ACTB           | actin, beta                                                 | ENST00000445914 | -0,525004512 |
| A_33_P3304268  | AK096549         | LOC643327      | uncharacterized LOC643327                                   |                 | -0,525038672 |
| A_23_P47704    | NM_003355        | UCP2           | uncoupling protein 2 (mitochondrial, proton carrier)        | ENST00000310473 | -0,525102559 |
| A_23_P343398   | NM_001838        | CCR7           | chemokine (C-C motif) receptor 7                            | ENST00000246657 | -0,525270217 |
| A_23_P122724   | NM_004665        | VNN2           | vanin 2                                                     | ENST00000392389 | -0,52528795  |
| A_23_P135769   | NM_001101        | ACTB           | actin, beta                                                 | ENST00000445914 | -0,525289566 |
| A_24_P370471   | NM_031482        | ATG10          | ATG10 autophagy related 10 homolog ( <i>S. cerevisiae</i> ) | ENST00000504770 | -0,525290619 |
| A_23_P101871   | NM_024907        | FBXO17         | F-box protein 17                                            | ENST00000292852 | -0,525354071 |



|                |                  |                |                                                           |                 |  |              |
|----------------|------------------|----------------|-----------------------------------------------------------|-----------------|--|--------------|
| A_21_P0009728  | TCONS_00027083   | XLOC_013124    |                                                           |                 |  | -0,52541997  |
| A_23_P128855   | NM_014579        | SLC39A2        | solute carrier family 39 (zinc transporter), member 2     | ENST00000298681 |  | -0,525447258 |
| A_24_P253003   | NM_004626        | WNT11          | wingless-type MMTV integration site family, member 11     | ENST00000447195 |  | -0,525513211 |
| A_24_P343233   | NM_002124        | HLA-DRB1       | major histocompatibility complex, class II, DR beta 1     | ENST00000549627 |  | -0,525696115 |
| A_21_P0011545  | TCONS_I2_0001078 | XLOC_I2_005793 |                                                           |                 |  | -0,525735128 |
| A_21_P0010571  | DQ983818         | C1orf81        | chromosome 1 open reading frame 81                        |                 |  | -0,525753215 |
| A_21_P0007684  | TCONS_00020694   | XLOC_009994    |                                                           |                 |  | -0,525762046 |
| A_21_P0010606  | DB520278         | XLOC_I2_000864 |                                                           |                 |  | -0,525886378 |
| A_24_P176714   | NM_015681        | B9D1           | B9 protein domain 1                                       | ENST00000477478 |  | -0,525905323 |
| A_32_P473302   | NR_015375        | FLJ35024       | uncharacterized LOC401491                                 |                 |  | -0,525915719 |
| A_21_P0012990  | ENST00000507733  | XLOC_I2_012071 |                                                           | ENST00000507733 |  | -0,52608649  |
| A_23_P106874   | NM_031293        | PMFBP1         | polyamine modulated factor 1 binding protein 1            | ENST00000379073 |  | -0,526114644 |
| A_23_P106389   | NM_003612        | SEMA7A         | semaphorin 7A, GPI membrane anchor (John Milton Hagen     | ENST00000543145 |  | -0,526151465 |
| A_23_P413796   | NM_138443        | HAUS1          | HAUS augmin-like complex, subunit 1                       | ENST00000282058 |  | -0,526229804 |
| A_33_P3418992  | AK123791         | LOC645769      | uncharacterized LOC645769                                 |                 |  | -0,526413025 |
| A_21_P0009799  | TCONS_00027655   | XLOC_013195    |                                                           |                 |  | -0,526490284 |
| A_24_P355649   | NM_002017        | FLI1           | Friend leukemia virus integration 1                       | ENST00000528790 |  | -0,526558081 |
| A_19_P00322371 | BC038559         | LOC100506190   | uncharacterized LOC100506190                              |                 |  | -0,526600853 |
| A_32_P181222   | NM_002247        | KCNMA1         | potassium large conductance calcium-activated channel, su | ENST00000412708 |  | -0,526841733 |
| A_33_P3327921  | NM_012249        | RHOQ           | ras homolog gene family, member Q                         |                 |  | -0,526845893 |
| A_21_P0012364  | TCONS_I2_0001843 | XLOC_I2_009613 |                                                           |                 |  | -0,526877963 |
| A_23_P109593   | NM_014346        | TBC1D22A       | TBC1 domain family, member 22A                            | ENST00000355704 |  | -0,526908257 |
| A_23_P397238   | NM_054014        | FKBP1A         | FK506 binding protein 1A, 12kDa                           | ENST00000381715 |  | -0,526988048 |
| A_33_P3313779  | NM_207311        | CCDC64         | coiled-coil domain containing 64                          | ENST00000397558 |  | -0,526991008 |
| A_24_P251381   | NM_024782        | NHEJ1          | nonhomologous end-joining factor 1                        | ENST00000318673 |  | -0,527030272 |
| A_33_P3248354  | NM_006334        | OLFM1          | olfactomedin 1                                            | ENST00000392991 |  | -0,527036914 |
| A_23_P118      | NM_001439        | EXTL2          | exostoses (multiple)-like 2                               | ENST00000370114 |  | -0,527096293 |
| A_23_P124733   | NM_015697        | COQ2           | coenzyme Q2 homolog, prenyltransferase (yeast)            | ENST00000311461 |  | -0,527124966 |
| A_21_P0014912  | XR_133002        | LOC100653221   | uncharacterized LOC100653221                              |                 |  | -0,527173541 |

|                |                 |              |                                                             |                 |              |
|----------------|-----------------|--------------|-------------------------------------------------------------|-----------------|--------------|
| A_33_P3230254  | NM_022346       | NCAPG        | non-SMC condensin I complex, subunit G                      | ENST00000251496 | -0,527203773 |
| A_19_P00321303 | BC038559        | LOC100506190 | uncharacterized LOC100506190                                |                 | -0,527320621 |
| A_23_P112846   | NM_001144978    | MTHFD2L      | methylenetetrahydrofolate dehydrogenase (NADP+ depend       | ENST00000492183 | -0,52743157  |
| A_23_P122937   | NM_014800       | ELMO1        | engulfment and cell motility 1                              | ENST00000396040 | -0,527687436 |
| A_23_P116898   | NM_000014       | A2M          | alpha-2-macroglobulin                                       | ENST00000540099 | -0,527688199 |
| A_23_P39799    | NM_032603       | LOXL3        | lysyl oxidase-like 3                                        | ENST00000409549 | -0,527712841 |
| A_23_P412321   | NM_000579       | CCR5         | chemokine (C-C motif) receptor 5                            | ENST00000343801 | -0,527722361 |
| A_23_P70794    | NM_016277       | RAB23        | RAB23, member RAS oncogene family                           | ENST00000317483 | -0,527846109 |
| A_21_P0006399  | TCONS_00016507  | XLOC_007895  |                                                             |                 | -0,527853774 |
| A_23_P14174    | NM_006573       | TNFSF13B     | tumor necrosis factor (ligand) superfamily, member 13b      | ENST00000486502 | -0,527920407 |
| A_21_P0007885  | NR_038383       | LOC643770    | uncharacterized LOC643770                                   | ENST00000549004 | -0,527966328 |
| A_21_P0012004  | BC033059        | FLJ16124     | FLJ16124 protein                                            |                 | -0,528055432 |
| A_23_P149476   | NM_032328       | EFCAB2       | EF-hand calcium binding domain 2                            | ENST00000447569 | -0,528060882 |
| A_23_P122937   | NM_014800       | ELMO1        | engulfment and cell motility 1                              | ENST00000396040 | -0,5280743   |
| A_21_P0006135  | TCONS_00015940  | XLOC_007308  |                                                             |                 | -0,528086145 |
| A_33_P3862375  | NM_001080481    | USP45        | ubiquitin specific peptidase 45                             | ENST00000539675 | -0,528145285 |
| A_21_P0013354  | NR_027789       | ZNF767       | zinc finger family member 767                               | ENST00000472212 | -0,528160909 |
| A_24_P154142   | NM_181885       | RXFP4        | relaxin/insulin-like family peptide receptor 4              | ENST00000368318 | -0,528177445 |
| A_23_P115645   | NM_001025076    | CELF2        | CUGBP, Elav-like family member 2                            | ENST00000537122 | -0,528268905 |
| A_23_P330262   | NM_012398       | PIP5K1C      | phosphatidylinositol-4-phosphate 5-kinase, type I, gamma    | ENST00000335312 | -0,528344643 |
| A_23_P414958   | NM_005761       | PLXNC1       | plexin C1                                                   | ENST00000549217 | -0,528346601 |
| A_23_P100127   | NM_170589       | CASC5        | cancer susceptibility candidate 5                           | ENST00000260369 | -0,528387488 |
| A_33_P3310274  | ENST00000420582 | LGR6         | leucine-rich repeat containing G protein-coupled receptor 6 | ENST00000420582 | -0,528536819 |
| A_23_P115726   | NM_194298       | SLC16A9      | solute carrier family 16, member 9 (monocarboxylic acid tra | ENST00000395348 | -0,528576987 |
| A_23_P113111   | NM_000044       | AR           | androgen receptor                                           | ENST00000544984 | -0,528618707 |
| A_21_P0000574  | NM_001047       | SRD5A1       | steroid-5-alpha-reductase, alpha polypeptide 1 (3-oxo-5 alp | ENST00000274192 | -0,528644661 |
| A_21_P0010215  | ENST00000424921 | XLOC_014110  |                                                             | ENST00000424921 | -0,528652301 |
| A_23_P131375   | NM_152391       | PQLC3        | PQ loop repeat containing 3                                 | ENST00000295083 | -0,528694335 |
| A_23_P103070   | NM_003405       | YWHAH        | tyrosine 3-monooxygenase/tryptophan 5-monooxygenase a       | ENST00000248975 | -0,528716057 |

|               |                 |                |                                                                    |                 |              |
|---------------|-----------------|----------------|--------------------------------------------------------------------|-----------------|--------------|
| A_33_P3261737 | NM_005660       | SLC35A2        | solute carrier family 35 (UDP-galactose transporter), memb         | ENST00000376512 | -0,52872542  |
| A_33_P3287477 | NM_001010912    | C10orf120      | chromosome 10 open reading frame 120                               | ENST00000432000 | -0,528732276 |
| A_23_P121564  | NM_000857       | GUCY1B3        | guanylate cyclase 1, soluble, beta 3                               | ENST00000264424 | -0,528811003 |
| A_23_P163955  | NM_007169       | PEMT           | phosphatidylethanolamine N-methyltransferase                       | ENST00000472446 | -0,52885699  |
| A_23_P170352  | NM_002949       | MRPL12         | mitochondrial ribosomal protein L12                                | ENST00000333676 | -0,528878352 |
| A_24_P81900   | NM_006931       | SLC2A3         | solute carrier family 2 (facilitated glucose transporter), men     | ENST00000486749 | -0,528879666 |
| A_32_P107617  | NM_003019       | SFTPD          | surfactant protein D                                               | ENST00000372292 | -0,528915956 |
| A_23_P423331  | NM_032536       | NTNG2          | netrin G2                                                          | ENST00000360670 | -0,52901501  |
| A_33_P3247644 | NM_152793       | C7orf41        | chromosome 7 open reading frame 41                                 | ENST00000324489 | -0,529047622 |
| A_23_P207879  | NM_024110       | CARD14         | caspase recruitment domain family, member 14                       | ENST00000344227 | -0,52918895  |
| A_21_P0003118 | TCONS_00006511  | XLOC_003125    |                                                                    |                 | -0,529204106 |
| A_23_P116898  | NM_000014       | A2M            | alpha-2-macroglobulin                                              | ENST00000540099 | -0,529253298 |
| A_23_P82047   | NM_001127715    | STXBP5         | syntaxin binding protein 5 (tomosyn)                               | ENST00000367479 | -0,529282779 |
| A_21_P0012076 | ENST00000445083 | XLOC_I2_008190 |                                                                    | ENST00000445083 | -0,529339656 |
| A_23_P17844   | NM_002854       | PVALB          | parvalbumin                                                        | ENST00000404171 | -0,529388306 |
| A_33_P3218872 | NM_152396       | METTL6         | methyltransferase like 6                                           |                 | -0,529421341 |
| A_32_P149298  | NM_001129993    | KIAA1841       | KIAA1841                                                           | ENST00000453873 | -0,529458712 |
| A_23_P103070  | NM_003405       | YWHAH          | tyrosine 3-monooxygenase/tryptophan 5-monooxygenase $\alpha$       | ENST00000248975 | -0,529512253 |
| A_33_P3231267 | BC041894        | LOC257396      | uncharacterized LOC257396                                          |                 | -0,529561076 |
| A_24_P343233  | NM_002124       | HLA-DRB1       | major histocompatibility complex, class II, DR beta 1              | ENST00000549627 | -0,529659545 |
| A_23_P212617  | NM_003234       | TFRC           | transferrin receptor (p90, CD71)                                   | ENST00000392396 | -0,529692879 |
| A_23_P202071  | NM_001025077    | CELF2          | CUGBP, Elav-like family member 2                                   | ENST00000354440 | -0,529759447 |
| A_21_P0001514 | THC2695938      | XLOC_000852    |                                                                    |                 | -0,529769869 |
| A_23_P127978  | NM_138706       | B3GNT6         | UDP-GlcNAc:betaGal beta-1,3-N-acetylglucosaminyltransfer           | ENST00000354301 | -0,529771488 |
| A_23_P416581  | NM_002073       | GNAZ           | guanine nucleotide binding protein (G protein), alpha $\zeta$ poly | ENST00000248996 | -0,529819677 |
| A_33_P3576574 | NR_033889       | LOC440131      | uncharacterized LOC440131                                          | ENST00000400540 | -0,529827741 |
| A_23_P202245  | NM_020975       | RET            | ret proto-oncogene                                                 | ENST00000355710 | -0,529841923 |
| A_21_P0004722 | AK126470        | XLOC_005592    |                                                                    |                 | -0,529848518 |
| A_23_P155052  | NM_030641       | APOL6          | apolipoprotein L, 6                                                | ENST00000409652 | -0,529987119 |

|               |                 |              |                                                           |                 |              |
|---------------|-----------------|--------------|-----------------------------------------------------------|-----------------|--------------|
| A_21_P0014565 | XR_110322       | LOC100507484 | uncharacterized LOC100507484                              | ENST00000552060 | -0,530007747 |
| A_23_P34644   | NM_004001       | FCGR2B       | Fc fragment of IgG, low affinity IIb, receptor (CD32)     | ENST00000236937 | -0,530032874 |
| A_23_P412321  | NM_000579       | CCR5         | chemokine (C-C motif) receptor 5                          | ENST00000343801 | -0,53012445  |
| A_23_P58953   | NM_000904       | NQO2         | NAD(P)H dehydrogenase, quinone 2                          | ENST00000426637 | -0,530135388 |
| A_33_P3218980 | NM_001776       | ENTPD1       | ectonucleoside triphosphate diphosphohydrolase 1          | ENST00000371203 | -0,530157393 |
| A_32_P110472  | NM_203395       | IYD          | iodotyrosine deiodinase                                   | ENST00000229447 | -0,530165595 |
| A_23_P122052  | NM_001008397    | GPX8         | glutathione peroxidase 8 (putative)                       | ENST00000503787 | -0,530184327 |
| A_23_P256948  | NM_005098       | MSC          | musculin                                                  | ENST00000325509 | -0,530234585 |
| A_23_P87560   | NM_001731       | BTG1         | B-cell translocation gene 1, anti-proliferative           | ENST00000256015 | -0,530235764 |
| A_33_P3410459 | NM_001204255    | SCARB2       | scavenger receptor class B, member 2                      | ENST00000264896 | -0,530244189 |
| A_23_P113825  | NM_144653       | NACC2        | NACC family member 2, BEN and BTB (POZ) domain contain    | ENST00000277554 | -0,530323775 |
| A_21_P0008878 | BC039386        | XLOC_011881  |                                                           |                 | -0,530376423 |
| A_23_P123228  | NM_000111       | SLC26A3      | solute carrier family 26, member 3                        | ENST00000340010 | -0,530456385 |
| A_23_P106362  | NM_020980       | AQP9         | aquaporin 9                                               | ENST00000219919 | -0,530536719 |
| A_23_P215720  | NM_000492       | CFTR         | cystic fibrosis transmembrane conductance regulator (ATP- | ENST00000003084 | -0,530553737 |
| A_24_P53282   | NM_001304       | CPD          | carboxypeptidase D                                        | ENST00000225719 | -0,530574371 |
| A_33_P3415216 | NM_002437       | MPV17        | MpV17 mitochondrial inner membrane protein                | ENST00000426513 | -0,530593574 |
| A_23_P200489  | NM_014698       | TMEM63A      | transmembrane protein 63A                                 | ENST00000366835 | -0,530605249 |
| A_23_P401472  | NM_000740       | CHRM3        | cholinergic receptor, muscarinic 3                        | ENST00000255380 | -0,530676949 |
| A_23_P103864  | NM_024525       | TTC13        | tetratricopeptide repeat domain 13                        | ENST00000414259 | -0,530749076 |
| A_21_P0002907 | ENST00000441185 | XLOC_003327  |                                                           | ENST00000441185 | -0,530872918 |
| A_21_P0004139 | ENST00000479830 | XLOC_004861  |                                                           | ENST00000479830 | -0,530949618 |
| A_23_P111000  | NM_002800       | PSMB9        | proteasome (prosome, macropain) subunit, beta type, 9 (la | ENST00000413480 | -0,531055106 |
| A_23_P26325   | NM_002987       | CCL17        | chemokine (C-C motif) ligand 17                           | ENST00000219244 | -0,531207897 |
| A_23_P128817  | NM_004563       | PCK2         | phosphoenolpyruvate carboxykinase 2 (mitochondrial)       | ENST00000545054 | -0,531223718 |
| A_23_P119778  | NM_020342       | SLC39A10     | solute carrier family 39 (zinc transporter), member 10    | ENST00000409086 | -0,531316449 |
| A_23_P45087   | NM_016220       | ZNF107       | zinc finger protein 107                                   | ENST00000423627 | -0,531323948 |
| A_23_P109593  | NM_014346       | TBC1D22A     | TBC1 domain family, member 22A                            | ENST00000355704 | -0,531348796 |
| A_23_P117662  | NM_002112       | HDC          | histidine decarboxylase                                   | ENST00000267845 | -0,531432031 |

|               |                |             |                                                             |                 |              |
|---------------|----------------|-------------|-------------------------------------------------------------|-----------------|--------------|
| A_23_P116898  | NM_000014      | A2M         | alpha-2-macroglobulin                                       | ENST00000540099 | -0,531478231 |
| A_23_P212617  | NM_003234      | TFRC        | transferrin receptor (p90, CD71)                            | ENST00000392396 | -0,531499045 |
| A_23_P352266  | NM_000633      | BCL2        | B-cell CLL/lymphoma 2                                       | ENST00000398117 | -0,531503054 |
| A_24_P343233  | NM_002124      | HLA-DRB1    | major histocompatibility complex, class II, DR beta 1       | ENST00000549627 | -0,531544009 |
| A_23_P156826  | NM_032744      | C6orf105    | chromosome 6 open reading frame 105                         | ENST00000514824 | -0,531546412 |
| A_33_P3253596 | NM_012310      | KIF4A       | kinesin family member 4A                                    | ENST00000374388 | -0,531682362 |
| A_21_P0007548 | TCONS_00020396 | XLOC_009725 |                                                             |                 | -0,531815605 |
| A_23_P105862  | NM_023037      | FRY         | furry homolog (Drosophila)                                  | ENST00000380257 | -0,531822172 |
| A_33_P3368750 | NM_001104554   | PAQR5       | progesterin and adipoQ receptor family member V             | ENST00000340965 | -0,531933783 |
| A_23_P134714  | NM_005836      | HRSP12      | heat-responsive protein 12                                  | ENST00000522791 | -0,531993047 |
| A_23_P116898  | NM_000014      | A2M         | alpha-2-macroglobulin                                       | ENST00000540099 | -0,532060558 |
| A_33_P3283713 | NM_015407      | ABHD14A     | abhydrolase domain containing 14A                           | ENST00000360889 | -0,532134665 |
| A_24_P366526  | BC105992       | SYNGR2      | synaptogyrin 2                                              |                 | -0,532174955 |
| A_23_P407614  | NM_152901      | PYDC1       | PYD (pyrin domain) containing 1                             | ENST00000302964 | -0,532180863 |
| A_23_P146456  | NM_001333      | CTSL2       | cathepsin L2                                                | ENST00000259470 | -0,532205694 |
| A_21_P0008700 | BC117365       | LOC145757   | uncharacterized LOC145757                                   |                 | -0,53220861  |
| A_24_P257971  | NM_005094      | SLC27A4     | solute carrier family 27 (fatty acid transporter), member 4 | ENST00000372870 | -0,53222412  |
| A_23_P122937  | NM_014800      | ELMO1       | engulfment and cell motility 1                              | ENST00000396040 | -0,532300605 |
| A_33_P3263867 | NM_002562      | P2RX7       | purinergic receptor P2X, ligand-gated ion channel, 7        | ENST00000328963 | -0,532384774 |
| A_23_P168847  | NM_172366      | FBXO16      | F-box protein 16                                            | ENST00000522609 | -0,532499532 |
| A_24_P147765  | NM_024955      | FOXRED2     | FAD-dependent oxidoreductase domain containing 2            | ENST00000216187 | -0,532562585 |
| A_23_P116898  | NM_000014      | A2M         | alpha-2-macroglobulin                                       | ENST00000540099 | -0,532576347 |
| A_23_P110941  | NM_001512      | GSTA4       | glutathione S-transferase alpha 4                           | ENST00000370960 | -0,532637703 |
| A_23_P8961    | NM_000880      | IL7         | interleukin 7                                               | ENST00000518982 | -0,53274243  |
| A_23_P135769  | NM_001101      | ACTB        | actin, beta                                                 | ENST00000445914 | -0,532797786 |
| A_23_P103617  | NM_003568      | ANXA9       | annexin A9                                                  | ENST00000368947 | -0,532808753 |
| A_21_P0006221 | TCONS_00016147 | XLOC_007543 |                                                             |                 | -0,532830488 |
| A_23_P319583  | NM_014747      | RIMS3       | regulating synaptic membrane exocytosis 3                   | ENST00000372684 | -0,532859981 |
| A_24_P117029  | NM_000527      | LDLR        | low density lipoprotein receptor                            | ENST00000252444 | -0,532897204 |



|               |                 |             |                                                                           |                 |              |
|---------------|-----------------|-------------|---------------------------------------------------------------------------|-----------------|--------------|
| A_32_P352358  | NM_001040071    | LOC650293   | seven transmembrane helix receptor                                        |                 | -0,532929902 |
| A_21_P0008528 | TCONS_00023071  | XLOC_010971 |                                                                           |                 | -0,53294116  |
| A_23_P145238  | NM_080593       | HIST1H2BK   | histone cluster 1, H2bk                                                   | ENST00000396891 | -0,532968023 |
| A_24_P141736  | NM_006838       | METAP2      | methionyl aminopeptidase 2                                                | ENST00000323666 | -0,532971319 |
| A_23_P211080  | NM_207585       | IFNAR2      | interferon (alpha, beta and omega) receptor 2                             | ENST00000382241 | -0,533049371 |
| A_33_P3356995 | AB209324        | ARFGEF1     | ADP-ribosylation factor guanine nucleotide-exchange factor                | ENST00000520381 | -0,533126095 |
| A_23_P94319   | NM_014867       | KBTBD11     | kelch repeat and BTB (POZ) domain containing 11                           | ENST00000320248 | -0,533174408 |
| A_21_P0011966 | NR_026758       | LOC440905   | uncharacterized LOC440905                                                 | ENST00000428123 | -0,533241327 |
| A_23_P117274  | NM_005932       | MIPEP       | mitochondrial intermediate peptidase                                      | ENST00000382172 | -0,533321916 |
| A_23_P119778  | NM_020342       | SLC39A10    | solute carrier family 39 (zinc transporter), member 10                    | ENST00000409086 | -0,533342274 |
| A_24_P309645  | NM_017901       | TPCN1       | two pore segment channel 1                                                | ENST00000551127 | -0,533414567 |
| A_23_P342000  | NM_144770       | RBM11       | RNA binding motif protein 11                                              | ENST00000468643 | -0,533678583 |
| A_23_P135769  | NM_001101       | ACTB        | actin, beta                                                               | ENST00000445914 | -0,533695481 |
| A_24_P343233  | NM_002124       | HLA-DRB1    | major histocompatibility complex, class II, DR beta 1                     | ENST00000549627 | -0,533782822 |
| A_23_P64888   | NM_023921       | TAS2R10     | taste receptor, type 2, member 10                                         | ENST00000240619 | -0,533825835 |
| A_21_P0002866 | ENST00000484675 | XLOC_003190 |                                                                           | ENST00000484675 | -0,533873812 |
| A_23_P44781   | NM_017774       | CDKAL1      | CDK5 regulatory subunit associated protein 1-like 1                       | ENST00000378624 | -0,53388263  |
| A_21_P0004325 | TCONS_00010162  | XLOC_004625 |                                                                           |                 | -0,533933496 |
| A_33_P3245439 | NM_001250       | CD40        | CD40 molecule, TNF receptor superfamily member 5                          | ENST00000477696 | -0,533986893 |
| A_33_P3290909 | NM_006306       | SMC1A       | structural maintenance of chromosomes 1A                                  | ENST00000322213 | -0,534058092 |
| A_23_P434398  | NM_153235       | TXLNB       | taxilin beta                                                              | ENST00000358430 | -0,534068846 |
| A_23_P250122  | NM_020223       | FAM20C      | family with sequence similarity 20, member C                              | ENST00000313766 | -0,534098973 |
| A_23_P69154   | NM_001129908    | FAM198A     | family with sequence similarity 198, member A                             | ENST00000430121 | -0,534138253 |
| A_23_P109593  | NM_014346       | TBC1D22A    | TBC1 domain family, member 22A                                            | ENST00000355704 | -0,534164253 |
| A_32_P95739   | NM_000365       | TPI1        | triosephosphate isomerase 1                                               | ENST00000535434 | -0,534214262 |
| A_21_P0004914 | TCONS_00011908  | XLOC_005409 |                                                                           |                 | -0,534326344 |
| A_23_P103864  | NM_024525       | TTC13       | tetratricopeptide repeat domain 13                                        | ENST00000414259 | -0,534381002 |
| A_24_P307626  | NM_144699       | ATP1A4      | ATPase, Na <sup>+</sup> /K <sup>+</sup> transporting, alpha 4 polypeptide | ENST00000477338 | -0,534389505 |
| A_33_P3420416 | NM_002308       | LGALS9      | lectin, galactoside-binding, soluble, 9                                   | ENST00000448970 | -0,534515397 |

|                |                 |              |                                                                |                 |              |
|----------------|-----------------|--------------|----------------------------------------------------------------|-----------------|--------------|
| A_23_P321354   | NM_144649       | TMEM71       | transmembrane protein 71                                       | ENST00000356838 | -0,534571772 |
| A_33_P3367251  | NM_001114395    | CNTLN        | centlein, centrosomal protein                                  |                 | -0,534691066 |
| A_21_P0003645  | TCONS_00008213  | XLOC_003674  |                                                                |                 | -0,5347455   |
| A_33_P3575529  | AF309699        | OR5E1P       | olfactory receptor, family 5, subfamily E, member 1 pseudogene |                 | -0,534793921 |
| A_23_P119337   | NM_012068       | ATF5         | activating transcription factor 5                              | ENST00000423777 | -0,534821169 |
| A_33_P3216694  | NM_024503       | HIVEP3       | human immunodeficiency virus type I enhancer binding pro       | ENST00000247584 | -0,534821384 |
| A_19_P00322611 | ENST00000523831 | XLOC_006883  |                                                                | ENST00000523831 | -0,53483759  |
| A_33_P3382177  | NM_003255       | TIMP2        | TIMP metalloproteinase inhibitor 2                             | ENST00000262768 | -0,53488757  |
| A_23_P11543    | NM_000147       | FUCA1        | fucosidase, alpha-L- 1, tissue                                 | ENST00000374479 | -0,535015967 |
| A_24_P350622   | NM_002255       | KIR2DL4      | killer cell immunoglobulin-like receptor, two domains, long    | ENST00000400852 | -0,535050343 |
| A_23_P91140    | NM_018441       | PECR         | peroxisomal trans-2-enoyl-CoA reductase                        | ENST00000461330 | -0,535059979 |
| A_33_P3390335  | NM_012425       | RSU1         | Ras suppressor protein 1                                       | ENST00000377921 | -0,535112653 |
| A_23_P63289    | NM_014188       | SSU72        | SSU72 RNA polymerase II CTD phosphatase homolog (S. cer        | ENST00000378726 | -0,535163359 |
| A_21_P0012568  | NM_030930       | UNC93B1      | unc-93 homolog B1 (C. elegans)                                 | ENST00000525262 | -0,535174694 |
| A_23_P142750   | NM_002759       | EIF2AK2      | eukaryotic translation initiation factor 2-alpha kinase 2      | ENST00000395127 | -0,535437866 |
| A_23_P40821    | NM_032383       | HPS3         | Hermansky-Pudlak syndrome 3                                    | ENST00000460822 | -0,535443481 |
| A_24_P388528   | NM_173216       | ST6GAL1      | ST6 beta-galactosamide alpha-2,6-sialyltransferase 1           | ENST00000470633 | -0,535461225 |
| A_23_P201596   | NM_004037       | AMPD2        | adenosine monophosphate deaminase 2                            | ENST00000528958 | -0,535476305 |
| A_21_P0014313  | XR_109244       | LOC100507378 | uncharacterized LOC100507378                                   |                 | -0,535478805 |
| A_33_P3231613  | NM_001129828    | CSAG3        | CSAG family, member 3                                          | ENST00000356911 | -0,535582823 |
| A_21_P0006842  | TCONS_00018138  | XLOC_008413  |                                                                |                 | -0,535589265 |
| A_24_P372217   | NM_007175       | ERLIN2       | ER lipid raft associated 2                                     | ENST00000276461 | -0,535622936 |
| A_23_P2745     | NM_006783       | GJB6         | gap junction protein, beta 6, 30kDa                            | ENST00000356192 | -0,53564172  |
| A_23_P100127   | NM_170589       | CASC5        | cancer susceptibility candidate 5                              | ENST00000260369 | -0,535680005 |
| A_23_P503182   | NM_021962       | ABR          | active BCR-related gene                                        | ENST00000291107 | -0,535743759 |
| A_24_P126139   | NM_016370       | RAB9B        | RAB9B, member RAS oncogene family                              | ENST00000243298 | -0,535766085 |
| A_33_P3361546  | NM_001032280    | TFAP2A       | transcription factor AP-2 alpha (activating enhancer binding   | ENST00000379604 | -0,53594022  |
| A_23_P117873   | NM_012125       | CHRM5        | cholinergic receptor, muscarinic 5                             | ENST00000383263 | -0,536065373 |
| A_24_P396375   | NM_001113347    | ECE1         | endothelin converting enzyme 1                                 | ENST00000415912 | -0,536132475 |

|                |                 |                |                                                           |                 |              |
|----------------|-----------------|----------------|-----------------------------------------------------------|-----------------|--------------|
| A_19_P00316745 | BC038559        | LOC100506190   | uncharacterized LOC100506190                              |                 | -0,53618046  |
| A_32_P162374   | NM_173529       | C18orf54       | chromosome 18 open reading frame 54                       | ENST00000300091 | -0,53621121  |
| A_23_P115645   | NM_001025076    | CELF2          | CUGBP, Elav-like family member 2                          | ENST00000537122 | -0,536270215 |
| A_33_P3361152  | NR_024452       | LOC100134259   | uncharacterized LOC100134259                              | ENST00000468141 | -0,536368479 |
| A_21_P0000556  | NR_028301       | LOC344595      | uncharacterized LOC344595                                 |                 | -0,536395901 |
| A_24_P99795    | NM_024710       | ISOC2          | isochorismatase domain containing 2                       | ENST00000085068 | -0,536440272 |
| A_21_P0014228  | ENST00000433357 | LOC100289137   |                                                           | ENST00000433357 | -0,536522507 |
| A_33_P3230841  | NM_001003892    | DUPD1          | dual specificity phosphatase and pro isomerase domain con | ENST00000338487 | -0,53653743  |
| A_23_P4036     | NM_018469       | TEX2           | testis expressed 2                                        | ENST00000258991 | -0,536564427 |
| A_23_P11543    | NM_000147       | FUCA1          | fucosidase, alpha-L- 1, tissue                            | ENST00000374479 | -0,536574568 |
| A_33_P3296707  | NM_001078173    | FAM127C        | family with sequence similarity 127, member C             | ENST00000391440 | -0,536624219 |
| A_23_P105862   | NM_023037       | FRY            | furry homolog (Drosophila)                                | ENST00000380257 | -0,536655757 |
| A_23_P108823   | NM_032523       | OSBPL6         | oxysterol binding protein-like 6                          | ENST00000315022 | -0,536720721 |
| A_33_P3322363  | NM_001123366    | HMSD           | histocompatibility (minor) serpin domain containing       | ENST00000408945 | -0,536814084 |
| A_21_P0009341  | NR_030732       | LOC645638      | WDNM1-like pseudogene                                     |                 | -0,53685748  |
| A_23_P111311   | NM_144497       | AKAP12         | A kinase (PRKA) anchor protein 12                         | ENST00000253332 | -0,5368729   |
| A_33_P3290914  | NM_006306       | SMC1A          | structural maintenance of chromosomes 1A                  | ENST00000340213 | -0,536936183 |
| A_21_P0011279  | ENST00000425648 | XLOC_I2_004192 |                                                           | ENST00000425648 | -0,53703181  |
| A_33_P3238484  | NM_014974       | DIP2C          | DIP2 disco-interacting protein 2 homolog C (Drosophila)   | ENST00000381496 | -0,53706312  |
| A_33_P3345309  | NM_001195129    | PRSS56         | protease, serine, 56                                      |                 | -0,537077706 |
| A_23_P106362   | NM_020980       | AQP9           | aquaporin 9                                               | ENST00000219919 | -0,537130068 |
| A_23_P118246   | NM_016095       | GINS2          | GINS complex subunit 2 (Psf2 homolog)                     | ENST00000253462 | -0,53727662  |
| A_33_P3318509  | NM_014358       | CLEC4E         | C-type lectin domain family 4, member E                   | ENST00000299663 | -0,537291232 |
| A_23_P110941   | NM_001512       | GSTA4          | glutathione S-transferase alpha 4                         | ENST00000370960 | -0,537308273 |
| A_23_P393955   | NM_175741       | C15orf55       | chromosome 15 open reading frame 55                       | ENST00000537011 | -0,537312435 |
| A_21_P0008780  | TCONS_00023783  | XLOC_011578    |                                                           |                 | -0,537369039 |
| A_24_P45620    | NM_021995       | UTS2           | urotensin 2                                               | ENST00000054668 | -0,537430836 |
| A_23_P109593   | NM_014346       | TBC1D22A       | TBC1 domain family, member 22A                            | ENST00000355704 | -0,537432984 |
| A_33_P3228450  | NM_001136007    | FXYD3          | FXYD domain containing ion transport regulator 3          | ENST00000435734 | -0,537437863 |

|               |                   |                |                                                             |                 |              |
|---------------|-------------------|----------------|-------------------------------------------------------------|-----------------|--------------|
| A_21_P0009619 | AK127565          | FLJ37638       | uncharacterized LOC400660                                   |                 | -0,53745862  |
| A_23_P212617  | NM_003234         | TFRC           | transferrin receptor (p90, CD71)                            | ENST00000392396 | -0,537474242 |
| A_21_P0009108 | TCONS_00024862    | XLOC_011754    |                                                             |                 | -0,537561272 |
| A_33_P3393170 | NM_004055         | CAPN5          | calpain 5                                                   | ENST00000360841 | -0,537647875 |
| A_21_P0000901 | NR_040100         | ENTPD3-AS1     | ENTPD3 antisense RNA 1 (non-protein coding)                 |                 | -0,53766683  |
| A_23_P202837  | NM_053056         | CCND1          | cyclin D1                                                   | ENST00000227507 | -0,537688402 |
| A_33_P3299285 | NM_001002901      | FCRLB          | Fc receptor-like B                                          | ENST00000336830 | -0,537692846 |
| A_21_P0010579 | TCONS_I2_00000862 | XLOC_I2_000643 |                                                             |                 | -0,537725224 |
| A_21_P0001410 | THC2751075        | XLOC_000542    |                                                             |                 | -0,537900142 |
| A_23_P106389  | NM_003612         | SEMA7A         | semaphorin 7A, GPI membrane anchor (John Milton Hagen       | ENST00000543145 | -0,537993628 |
| A_23_P57036   | NM_001250         | CD40           | CD40 molecule, TNF receptor superfamily member 5            | ENST00000477696 | -0,538008045 |
| A_23_P115726  | NM_194298         | SLC16A9        | solute carrier family 16, member 9 (monocarboxylic acid tra | ENST00000395348 | -0,538321384 |
| A_33_P3249434 | NM_001031689      | PLAA           | phospholipase A2-activating protein                         |                 | -0,538425939 |
| A_33_P3280805 | NM_015842         | LMO7           | LIM domain 7                                                | ENST00000357063 | -0,538518676 |
| A_21_P0011339 | TCONS_I2_00008792 | XLOC_I2_004772 |                                                             |                 | -0,538537873 |
| A_33_P3319760 | NM_003564         | TAGLN2         | transgelin 2                                                | ENST00000397334 | -0,538919476 |
| A_23_P208493  | NM_005874         | LILRB2         | leukocyte immunoglobulin-like receptor, subfamily B (with   | ENST00000434421 | -0,539097187 |
| A_23_P131215  | NM_006891         | CRYGD          | crystallin, gamma D                                         | ENST00000264376 | -0,539229039 |
| A_33_P3422247 | NM_001652         | AQP6           | aquaporin 6, kidney specific                                | ENST00000315520 | -0,539274336 |
| A_23_P31896   | NM_003033         | ST3GAL1        | ST3 beta-galactoside alpha-2,3-sialyltransferase 1          | ENST00000522652 | -0,539300988 |
| A_23_P116898  | NM_000014         | A2M            | alpha-2-macroglobulin                                       | ENST00000540099 | -0,53935184  |
| A_23_P3014    | NM_005615         | RNASE6         | ribonuclease, RNase A family, k6                            | ENST00000304677 | -0,5393612   |
| A_33_P3400763 | NM_001080400      | PLIN4          | perilipin 4                                                 | ENST00000301286 | -0,539409681 |
| A_23_P103864  | NM_024525         | TTC13          | tetratricopeptide repeat domain 13                          | ENST00000414259 | -0,539488752 |
| A_33_P3214670 | NM_000189         | HK2            | hexokinase 2                                                | ENST00000290573 | -0,539495403 |
| A_33_P3387856 | NM_001100625      | CENPN          | centromere protein N                                        | ENST00000393335 | -0,539859993 |
| A_21_P0009887 | ENST00000455890   | XLOC_013675    |                                                             | ENST00000455890 | -0,539970796 |
| A_23_P162719  | NM_030932         | DIAPH3         | diaphanous homolog 3 (Drosophila)                           | ENST00000498416 | -0,540038759 |
| A_23_P116829  | NM_003348         | UBE2N          | ubiquitin-conjugating enzyme E2N                            | ENST00000318066 | -0,540106432 |

|                |                 |              |                                                             |  |                 |              |
|----------------|-----------------|--------------|-------------------------------------------------------------|--|-----------------|--------------|
| A_21_P0007187  | TCONS_00019257  | XLOC_009087  |                                                             |  |                 | -0,540203239 |
| A_23_P104996   | NM_004183       | BEST1        | bestrophin 1                                                |  | ENST00000524877 | -0,540292992 |
| A_19_P00322181 | THC2579385      | P39188       |                                                             |  |                 | -0,54034555  |
| A_24_P374634   | NM_001164380    | STAU2        | stauflen, RNA binding protein, homolog 2 (Drosophila)       |  | ENST00000524300 | -0,540359712 |
| A_33_P3371320  | NM_199194       | BRE          | brain and reproductive organ-expressed (TNFRSF1A modula     |  | ENST00000379623 | -0,540408706 |
| A_23_P212617   | NM_003234       | TFRC         | transferrin receptor (p90, CD71)                            |  | ENST00000392396 | -0,540418863 |
| A_23_P106874   | NM_031293       | PMFBP1       | polyamine modulated factor 1 binding protein 1              |  | ENST00000379073 | -0,540533658 |
| A_21_P0002617  | TCONS_00004935  | XLOC_001732  |                                                             |  |                 | -0,540543377 |
| A_23_P57856    | NM_001130845    | BCL6         | B-cell CLL/lymphoma 6                                       |  | ENST00000419510 | -0,54054976  |
| A_21_P0005213  | ENST00000411542 | XLOC_005988  |                                                             |  | ENST00000411542 | -0,540673779 |
| A_21_P0007601  | TCONS_00020512  | XLOC_009829  |                                                             |  |                 | -0,540745368 |
| A_19_P00808382 | NR_038883       | LOC100506334 | uncharacterized LOC100506334                                |  |                 | -0,540758664 |
| A_33_P3354935  | NM_172212       | CSF1         | colony stimulating factor 1 (macrophage)                    |  | ENST00000369802 | -0,540791472 |
| A_24_P268123   | NM_174963       | ST3GAL3      | ST3 beta-galactoside alpha-2,3-sialyltransferase 3          |  | ENST00000489897 | -0,540886825 |
| A_33_P3354322  | NM_201397       | GPX1         | glutathione peroxidase 1                                    |  | ENST00000419783 | -0,540999306 |
| A_33_P3380493  | NM_031286       | SH3BGL3      | SH3 domain binding glutamic acid-rich protein like 3        |  | ENST00000374243 | -0,541019118 |
| A_23_P117274   | NM_005932       | MIPEP        | mitochondrial intermediate peptidase                        |  | ENST00000382172 | -0,54104212  |
| A_33_P3343045  | ENST00000393235 | CALHM2       | calcium homeostasis modulator 2                             |  | ENST00000393235 | -0,541113451 |
| A_23_P107454   | NM_031958       | KRTAP3-1     | keratin associated protein 3-1                              |  | ENST00000391588 | -0,541118122 |
| A_23_P79094    | NM_006865       | LILRA3       | leukocyte immunoglobulin-like receptor, subfamily A (withc  |  | ENST00000251390 | -0,54112948  |
| A_33_P3285156  | NR_026857       | FLJ90757     | uncharacterized LOC440465                                   |  |                 | -0,54128991  |
| A_33_P3257903  | NM_001512       | GSTA4        | glutathione S-transferase alpha 4                           |  | ENST00000370959 | -0,54129024  |
| A_23_P105862   | NM_023037       | FRY          | furry homolog (Drosophila)                                  |  | ENST00000380257 | -0,541323331 |
| A_33_P3235147  | NM_005221       | DLX5         | distal-less homeobox 5                                      |  | ENST00000222598 | -0,541341626 |
| A_23_P106362   | NM_020980       | AQP9         | aquaporin 9                                                 |  | ENST00000219919 | -0,541389155 |
| A_21_P0000292  | NR_002829       | P2RX6P       | purinergic receptor P2X, ligand-gated ion channel, 6 pseudc |  | ENST00000439119 | -0,541698521 |
| A_33_P3327822  | NM_007341       | SH3BGR       | SH3 domain binding glutamic acid-rich protein               |  | ENST00000380631 | -0,541714947 |
| A_19_P00809624 | NM_001145191    | FAM200B      |                                                             |  | ENST00000504137 | -0,541742232 |
| A_21_P0007403  | NR_034148       | LOC283143    | uncharacterized LOC283143                                   |  |                 | -0,541950891 |



|                |                 |                |                                                                |                 |              |
|----------------|-----------------|----------------|----------------------------------------------------------------|-----------------|--------------|
| A_33_P3241937  | NM_019020       | TBC1D16        | TBC1 domain family, member 16                                  | ENST00000310924 | -0,542028996 |
| A_23_P24784    | NM_003282       | TNNI2          | troponin I type 2 (skeletal, fast)                             | ENST00000381906 | -0,542122754 |
| A_23_P305140   | NM_144591       | C10orf32       | chromosome 10 open reading frame 32                            | ENST00000369883 | -0,54235124  |
| A_23_P115645   | NM_001025076    | CELF2          | CUGBP, Elav-like family member 2                               | ENST00000537122 | -0,54238428  |
| A_23_P401700   | NM_019043       | APBB1IP        | amyloid beta (A4) precursor protein-binding, family B, mem     | ENST00000376236 | -0,542394544 |
| A_33_P3235568  | NM_001206540    | CAPZB          | capping protein (actin filament) muscle Z-line, beta           | ENST00000375142 | -0,542672448 |
| A_23_P501754   | NM_000759       | CSF3           | colony stimulating factor 3 (granulocyte)                      | ENST00000394149 | -0,542958334 |
| A_33_P3351249  | NM_001100812    | CXCL16         | chemokine (C-X-C motif) ligand 16                              |                 | -0,542990047 |
| A_19_P00322426 | NR_015364       | LOC441204      | uncharacterized LOC441204                                      |                 | -0,542996892 |
| A_33_P3272938  | NM_021209       | NLRC4          | NLR family, CARD domain containing 4                           | ENST00000342905 | -0,543001332 |
| A_24_P21266    | NM_001003790    | ERLIN2         | ER lipid raft associated 2                                     | ENST00000397228 | -0,543065138 |
| A_33_P3361741  | NM_013238       | DNAJC15        | DnaJ (Hsp40) homolog, subfamily C, member 15                   |                 | -0,543072989 |
| A_23_P82651    | NM_002523       | NPTX2          | neuronal pentraxin II                                          | ENST00000265634 | -0,543196004 |
| A_21_P0013258  | THC2565454      | XLOC_I2_013532 |                                                                |                 | -0,543204829 |
| A_24_P29723    | NM_000941       | POR            | P450 (cytochrome) oxidoreductase                               | ENST00000412064 | -0,543232895 |
| A_23_P106362   | NM_020980       | AQP9           | aquaporin 9                                                    | ENST00000219919 | -0,543403336 |
| A_23_P402670   | NM_001763       | CD1A           | CD1a molecule                                                  | ENST00000289429 | -0,543408865 |
| A_23_P116898   | NM_000014       | A2M            | alpha-2-macroglobulin                                          | ENST00000540099 | -0,54342043  |
| A_23_P117852   | NM_014736       | KIAA0101       | KIAA0101                                                       | ENST00000380258 | -0,543444584 |
| A_21_P0014761  | ENST00000453348 | LOC100505644   |                                                                | ENST00000453348 | -0,543446999 |
| A_33_P3413987  | NM_000062       | SERPING1       | serpin peptidase inhibitor, clade G (C1 inhibitor), member 1   | ENST00000278407 | -0,543458116 |
| A_33_P3327617  | NM_201563       | FCGR2C         | Fc fragment of IgG, low affinity IIc, receptor for (CD32) (gen | ENST00000452001 | -0,54350272  |
| A_23_P102117   | NM_025216       | WNT10A         | wingless-type MMTV integration site family, member 10A         | ENST00000258411 | -0,543555896 |
| A_24_P171873   | NM_012176       | FBXO4          | F-box protein 4                                                | ENST00000513496 | -0,543650522 |
| A_23_P40821    | NM_032383       | HPS3           | Hermansky-Pudlak syndrome 3                                    | ENST00000460822 | -0,543659129 |
| A_23_P57036    | NM_001250       | CD40           | CD40 molecule, TNF receptor superfamily member 5               | ENST00000477696 | -0,543666051 |
| A_23_P212617   | NM_003234       | TFRC           | transferrin receptor (p90, CD71)                               | ENST00000392396 | -0,543672008 |
| A_23_P103511   | NM_001085375    | C1orf226       | chromosome 1 open reading frame 226                            | ENST00000458626 | -0,543749715 |
| A_33_P3424062  | NM_002236       | KCNF1          | potassium voltage-gated channel, subfamily F, member 1         | ENST00000295082 | -0,543821243 |

|               |                 |              |                                                                       |                 |              |
|---------------|-----------------|--------------|-----------------------------------------------------------------------|-----------------|--------------|
| A_33_P3360426 | NM_017491       | WDR1         | WD repeat domain 1                                                    | ENST00000264785 | -0,543878565 |
| A_23_P110941  | NM_001512       | GSTA4        | glutathione S-transferase alpha 4                                     | ENST00000370960 | -0,543898835 |
| A_23_P115872  | NM_018131       | CEP55        | centrosomal protein 55kDa                                             | ENST00000371485 | -0,543951353 |
| A_33_P3399150 | ENST00000542515 | ORAOV1       | oral cancer overexpressed 1                                           | ENST00000542515 | -0,544003575 |
| A_32_P89310   | NM_001080475    | PLEKHM3      | pleckstrin homology domain containing, family M, member               | ENST00000343987 | -0,544020837 |
| A_32_P780862  | NM_001720       | BMP8B        | bone morphogenetic protein 8b                                         | ENST00000397360 | -0,544039604 |
| A_32_P91042   | NR_027406       | LOC100129034 | uncharacterized LOC100129034                                          |                 | -0,544062298 |
| A_23_P113748  | NM_024697       | ZNF385D      | zinc finger protein 385D                                              | ENST00000494118 | -0,544083197 |
| A_23_P122724  | NM_004665       | VNN2         | vanin 2                                                               | ENST00000392389 | -0,544112435 |
| A_24_P212539  | NM_138801       | GALM         | galactose mutarotase (aldose 1-epimerase)                             | ENST00000444351 | -0,54418892  |
| A_32_P43812   | NM_001040402    | DCUN1D4      | DCN1, defective in cullin neddylation 1, domain containing            | ENST00000477560 | -0,544200953 |
| A_23_P9255    | NM_003177       | SYK          | spleen tyrosine kinase                                                | ENST00000375754 | -0,544274319 |
| A_32_P148710  | NM_005507       | CFL1         | cofilin 1 (non-muscle)                                                | ENST00000308162 | -0,544476842 |
| A_23_P57413   | NM_014634       | PPM1F        | protein phosphatase, Mg <sup>2+</sup> /Mn <sup>2+</sup> dependent, 1F | ENST00000484588 | -0,544482375 |
| A_23_P102471  | NM_000251       | MSH2         | mutS homolog 2, colon cancer, nonpolyposis type 1 (E. coli)           | ENST00000543555 | -0,544563484 |
| A_33_P3313899 | NR_033917       | LOC728228    | uncharacterized LOC728228                                             | ENST00000419003 | -0,544588818 |
| A_23_P352266  | NM_000633       | BCL2         | B-cell CLL/lymphoma 2                                                 | ENST00000398117 | -0,544619671 |
| A_23_P121480  | NM_001004196    | CD200        | CD200 molecule                                                        | ENST00000478595 | -0,544632721 |
| A_23_P57036   | NM_001250       | CD40         | CD40 molecule, TNF receptor superfamily member 5                      | ENST00000477696 | -0,544746624 |
| A_33_P3277988 | NM_000629       | IFNAR1       | interferon (alpha, beta and omega) receptor 1                         | ENST00000270139 | -0,544777921 |
| A_33_P3224819 | NM_001080431    | SLC45A4      | solute carrier family 45, member 4                                    | ENST00000024061 | -0,544952889 |
| A_24_P228026  | NM_144611       | CYB5D2       | cytochrome b5 domain containing 2                                     | ENST00000301391 | -0,544957705 |
| A_23_P29153   | NM_014433       | RTDR1        | rhabdoid tumor deletion region gene 1                                 | ENST00000216036 | -0,545061132 |
| A_23_P106362  | NM_020980       | AQP9         | aquaporin 9                                                           | ENST00000219919 | -0,545213261 |
| A_23_P11543   | NM_000147       | FUCA1        | fucosidase, alpha-L- 1, tissue                                        | ENST00000374479 | -0,545231731 |
| A_23_P210948  | NM_018244       | UQCC         | ubiquinol-cytochrome c reductase complex chaperone                    | ENST00000496812 | -0,545242267 |
| A_33_P3284883 | NM_024761       | MOB3B        | MOB kinase activator 3B                                               | ENST00000262244 | -0,545266344 |
| A_23_P412321  | NM_000579       | CCR5         | chemokine (C-C motif) receptor 5                                      | ENST00000343801 | -0,54533064  |
| A_32_P447001  | NM_001198784    | FLJ27352     | uncharacterized LOC145788                                             |                 | -0,545355251 |

|                |                 |                |                                                              |                 |              |
|----------------|-----------------|----------------|--------------------------------------------------------------|-----------------|--------------|
| A_23_P117274   | NM_005932       | MIPEP          | mitochondrial intermediate peptidase                         | ENST00000382172 | -0,545411808 |
| A_19_P00316624 | ENST00000514050 | XLOC_l2_011173 |                                                              | ENST00000514050 | -0,545421281 |
| A_23_P74609    | NM_015714       | GOS2           | G0/G1switch 2                                                | ENST00000367029 | -0,545482187 |
| A_23_P7827     | NM_001010919    | FAM26F         | family with sequence similarity 26, member F                 | ENST00000368605 | -0,545855495 |
| A_23_P9255     | NM_003177       | SYK            | spleen tyrosine kinase                                       | ENST00000375754 | -0,545864929 |
| A_33_P3288700  | NM_058190       | FAM207A        | family with sequence similarity 207, member A                | ENST00000291634 | -0,545947754 |
| A_23_P126499   | NM_030907       | RSG1           | REM2 and RAB-like small GTPase 1                             | ENST00000375599 | -0,546196264 |
| A_23_P117852   | NM_014736       | KIAA0101       | KIAA0101                                                     | ENST00000380258 | -0,546319257 |
| A_23_P103099   | NM_001031695    | RBFOX2         | RNA binding protein, fox-1 homolog (C. elegans) 2            | ENST00000438146 | -0,54650538  |
| A_21_P0009516  | TCONS_00026396  | XLOC_012747    |                                                              |                 | -0,546528654 |
| A_33_P3323928  | NR_026762       | LINC00263      | long intergenic non-protein coding RNA 263                   |                 | -0,546530139 |
| A_24_P301454   | NR_003108       | NBR2           | neighbor of BRCA1 gene 2 (non-protein coding)                | ENST00000464237 | -0,546594701 |
| A_21_P0008622  | ENST00000481262 | IVD            | isovaleryl-CoA dehydrogenase                                 | ENST00000481262 | -0,546697665 |
| A_23_P106362   | NM_020980       | AQP9           | aquaporin 9                                                  | ENST00000219919 | -0,546866967 |
| A_23_P217339   | NM_005044       | PRKX           | protein kinase, X-linked                                     | ENST00000262848 | -0,546915838 |
| A_21_P0006078  | CR627148        | XLOC_007710    |                                                              |                 | -0,546981385 |
| A_23_P212617   | NM_003234       | TFRC           | transferrin receptor (p90, CD71)                             | ENST00000392396 | -0,546982635 |
| A_33_P3227793  | NM_006569       | CGREF1         | cell growth regulator with EF-hand domain 1                  | ENST00000260595 | -0,547070216 |
| A_33_P3258452  | NM_020375       | C12orf5        | chromosome 12 open reading frame 5                           |                 | -0,547095922 |
| A_19_P00322711 | NR_027301       | LOC148189      |                                                              |                 | -0,547301941 |
| A_33_P3404470  | NM_030930       | UNC93B1        | unc-93 homolog B1 (C. elegans)                               | ENST00000525262 | -0,547367841 |
| A_33_P3347161  | NM_005647       | TBL1X          | transducin (beta)-like 1X-linked                             | ENST00000380961 | -0,54758157  |
| A_33_P3235975  | NM_032343       | CHCHD6         | coiled-coil-helix-coiled-coil-helix domain containing 6      | ENST00000514908 | -0,547659255 |
| A_23_P106389   | NM_003612       | SEMA7A         | semaphorin 7A, GPI membrane anchor (John Milton Hagen        | ENST00000543145 | -0,54771078  |
| A_24_P360078   | NM_006726       | LRBA           | LPS-responsive vesicle trafficking, beach and anchor contain | ENST00000510157 | -0,547765561 |
| A_23_P128094   | NM_019625       | ABCB9          | ATP-binding cassette, sub-family B (MDR/TAP), member 9       | ENST00000540866 | -0,547909247 |
| A_23_P14035    | NM_006422       | AKAP3          | A kinase (PRKA) anchor protein 3                             | ENST00000545990 | -0,547910555 |
| A_23_P406025   | NM_015225       | PRUNE2         | prune homolog 2 (Drosophila)                                 | ENST00000428286 | -0,547925097 |
| A_23_P69293    | NM_018397       | CHDH           | choline dehydrogenase                                        | ENST00000315251 | -0,548060011 |

|                |                 |                |                                                              |                 |              |
|----------------|-----------------|----------------|--------------------------------------------------------------|-----------------|--------------|
| A_33_P3290588  | AK127159        | ASPSCR1        | alveolar soft part sarcoma chromosome region, candidate 1    |                 | -0,548215666 |
| A_21_P0012769  | ENST00000506292 | XLOC_I2_011062 |                                                              | ENST00000506292 | -0,548250694 |
| A_23_P143987   | NM_006395       | ATG7           | ATG7 autophagy related 7 homolog (S. cerevisiae)             | ENST00000466605 | -0,548543841 |
| A_23_P28948    | NM_014012       | REM1           | RAS (RAD and GEM)-like GTP-binding 1                         | ENST00000201979 | -0,548734081 |
| A_24_P372223   | NM_138715       | MSR1           | macrophage scavenger receptor 1                              | ENST00000350896 | -0,549006743 |
| A_23_P70355    | NM_004568       | SERPINB6       | serpin peptidase inhibitor, clade B (ovalbumin), member 6    | ENST00000380520 | -0,549063865 |
| A_23_P392942   | NM_002445       | MSR1           | macrophage scavenger receptor 1                              | ENST00000381998 | -0,549071393 |
| A_23_P256735   | NM_016134       | PGCP           | plasma glutamate carboxypeptidase                            | ENST00000220763 | -0,549150727 |
| A_23_P74112    | NM_170743       | IL28RA         | interleukin 28 receptor, alpha (interferon, lambda receptor) | ENST00000327535 | -0,54924804  |
| A_21_P0014183  | XR_108739       | LOC100505921   | uncharacterized LOC100505921                                 | ENST00000451066 | -0,549284279 |
| A_23_P200030   | NM_003838       | FPGT           | fucose-1-phosphate guanylyltransferase                       | ENST00000370898 | -0,54930317  |
| A_23_P104996   | NM_004183       | BEST1          | bestrophin 1                                                 | ENST00000524877 | -0,54933368  |
| A_33_P3239185  | NM_001252065    | SYT7           | synaptotagmin VII                                            | ENST00000263846 | -0,549354237 |
| A_33_P3330872  | NM_078629       | MSL3           | male-specific lethal 3 homolog (Drosophila)                  | ENST00000380692 | -0,549426771 |
| A_23_P24987    | NM_005981       | TSPAN31        | tetraspanin 31                                               | ENST00000549052 | -0,549452092 |
| A_32_P130630   | NM_004731       | SLC16A7        | solute carrier family 16, member 7 (monocarboxylic acid tra  | ENST00000261187 | -0,549454141 |
| A_23_P129014   | NM_145231       | EFCAB11        | EF-hand calcium binding domain 11                            | ENST00000553871 | -0,549506368 |
| A_23_P49009    | NM_153613       | LPCAT4         | lysophosphatidylcholine acyltransferase 4                    | ENST00000314891 | -0,549521561 |
| A_23_P69513    | NM_198229       | RGS12          | regulator of G-protein signaling 12                          | ENST00000306648 | -0,549620045 |
| A_33_P3234635  | NM_178493       | NOTUM          | notum pectinacetylerase homolog (Drosophila)                 | ENST00000409678 | -0,549679639 |
| A_21_P0002669  | TCONS_00005195  | XLOC_002198    |                                                              |                 | -0,549700132 |
| A_23_P106362   | NM_020980       | AQP9           | aquaporin 9                                                  | ENST00000219919 | -0,549701043 |
| A_23_P104996   | NM_004183       | BEST1          | bestrophin 1                                                 | ENST00000524877 | -0,549757521 |
| A_21_P0006910  | TCONS_00018331  | XLOC_008609    |                                                              |                 | -0,549773966 |
| A_23_P396858   | NM_031866       | FZD8           | frizzled family receptor 8                                   | ENST00000374694 | -0,549799417 |
| A_23_P344531   | NM_007286       | SYNPO          | synaptopodin                                                 | ENST00000307662 | -0,550043562 |
| A_23_P117274   | NM_005932       | MIPEP          | mitochondrial intermediate peptidase                         | ENST00000382172 | -0,550095077 |
| A_19_P00322856 | NM_001145191    | FAM200B        |                                                              | ENST00000502502 | -0,550106674 |
| A_23_P109593   | NM_014346       | TBC1D22A       | TBC1 domain family, member 22A                               | ENST00000355704 | -0,550267872 |

|                |                 |                |                                                             |                 |              |
|----------------|-----------------|----------------|-------------------------------------------------------------|-----------------|--------------|
| A_33_P3258767  | NM_001243517    | LOC100130480   | uncharacterized LOC100130480                                |                 | -0,550360026 |
| A_23_P500614   | NM_001243       | TNFRSF8        | tumor necrosis factor receptor superfamily, member 8        | ENST00000263932 | -0,550485159 |
| A_21_P0006520  | BC030106        | XLOC_008088    |                                                             |                 | -0,550523543 |
| A_23_P212617   | NM_003234       | TFRC           | transferrin receptor (p90, CD71)                            | ENST00000392396 | -0,550535631 |
| A_23_P116898   | NM_000014       | A2M            | alpha-2-macroglobulin                                       | ENST00000540099 | -0,550668127 |
| A_21_P0001822  | ENST00000483023 | XLOC_001340    |                                                             | ENST00000483023 | -0,550679572 |
| A_23_P212617   | NM_003234       | TFRC           | transferrin receptor (p90, CD71)                            | ENST00000392396 | -0,550702266 |
| A_33_P3303785  | NM_001025069    | ARPP21         | cAMP-regulated phosphoprotein, 21kDa                        | ENST00000396482 | -0,550767691 |
| A_23_P61280    | NM_012133       | COPG2          | coatamer protein complex, subunit gamma 2                   | ENST00000425248 | -0,550881211 |
| A_24_P385585   | NM_152834       | TMEM18         | transmembrane protein 18                                    | ENST00000432667 | -0,550909825 |
| A_23_P57036    | NM_001250       | CD40           | CD40 molecule, TNF receptor superfamily member 5            | ENST00000477696 | -0,55092149  |
| A_21_P0003040  | TCONS_00006262  | XLOC_002865    |                                                             |                 | -0,551207488 |
| A_24_P62615    | NM_006367       | CAP1           | CAP, adenylate cyclase-associated protein 1 (yeast)         | ENST00000372792 | -0,551242352 |
| A_23_P304991   | NM_000411       | HLCS           | holocarboxylase synthetase (biotin-(propionyl-CoA-carboxyl) | ENST00000399120 | -0,551246421 |
| A_21_P0000740  | NR_038260       | HIVEP3         | human immunodeficiency virus type I enhancer binding pro    | ENST00000491442 | -0,551286809 |
| A_23_P352266   | NM_000633       | BCL2           | B-cell CLL/lymphoma 2                                       | ENST00000398117 | -0,551289243 |
| A_24_P100996   | NM_213599       | ANO5           | anoctamin 5                                                 | ENST00000324559 | -0,551360924 |
| A_33_P3379606  | NM_001029875    | RGS7BP         | regulator of G-protein signaling 7 binding protein          | ENST00000334025 | -0,551379742 |
| A_21_P0009312  | TCONS_00025610  | XLOC_012442    |                                                             |                 | -0,551409155 |
| A_21_P0013020  | DB051956        | XLOC_I2_012432 |                                                             |                 | -0,551515526 |
| A_24_P117323   | NM_032775       | KLHL22         | kelch-like 22 (Drosophila)                                  | ENST00000440659 | -0,551578985 |
| A_21_P0004981  | THC2664316      | XLOC_005567    |                                                             |                 | -0,551604837 |
| A_23_P207400   | NM_007300       | BRCA1          | breast cancer 1, early onset                                | ENST00000412061 | -0,551621559 |
| A_19_P00322934 | BC038559        | LOC100506190   | uncharacterized LOC100506190                                |                 | -0,551671577 |
| A_23_P109171   | NM_001195       | BFSP1          | beaded filament structural protein 1, filensin              | ENST00000536626 | -0,551689596 |
| A_23_P57036    | NM_001250       | CD40           | CD40 molecule, TNF receptor superfamily member 5            | ENST00000477696 | -0,551716494 |
| A_33_P3862354  | NM_025204       | TRABD          | TraB domain containing                                      | ENST00000472677 | -0,551737756 |
| A_23_P105524   | NM_033123       | PLCZ1          | phospholipase C, zeta 1                                     | ENST00000539875 | -0,552013114 |
| A_23_P115726   | NM_194298       | SLC16A9        | solute carrier family 16, member 9 (monocarboxylic acid tra | ENST00000395348 | -0,552151726 |



|               |                 |                |                                                                 |                 |              |
|---------------|-----------------|----------------|-----------------------------------------------------------------|-----------------|--------------|
| A_21_P0005196 | BC061919        | XLOC_006195    |                                                                 |                 | -0,552228429 |
| A_24_P586523  | NM_019109       | ALG1           | asparagine-linked glycosylation 1, beta-1,4-mannosyltransferase | ENST00000533775 | -0,552284544 |
| A_23_P46017   | NM_001008661    | CCBL2          | cysteine conjugate-beta lyase 2                                 | ENST00000370485 | -0,552309709 |
| A_33_P3289296 | NM_183240       | TMEM37         | transmembrane protein 37                                        | ENST00000306406 | -0,552352231 |
| A_24_P142118  | NM_003246       | THBS1          | thrombospondin 1                                                | ENST00000260356 | -0,552436454 |
| A_33_P3449097 | NM_031945       | TSPAN10        | tetraspanin 10                                                  | ENST00000540189 | -0,552465718 |
| A_33_P3405213 | NM_000442       | PECAM1         | platelet/endothelial cell adhesion molecule                     |                 | -0,552493134 |
| A_23_P132226  | NM_001008566    | TPST2          | tyrosylprotein sulfotransferase 2                               | ENST00000528868 | -0,552520358 |
| A_24_P90881   | NM_024922       | CES3           | carboxylesterase 3                                              | ENST00000303334 | -0,552624065 |
| A_21_P0014762 | XR_132528       | LOC100652832   |                                                                 |                 | -0,55265195  |
| A_23_P391857  | NM_004452       | ESRRB          | estrogen-related receptor beta                                  | ENST00000261532 | -0,552672927 |
| A_23_P113701  | NM_002607       | PDGFA          | platelet-derived growth factor alpha polypeptide                | ENST00000402802 | -0,552948017 |
| A_23_P12082   | NM_001025199    | CHI3L2         | chitinase 3-like 2                                              | ENST00000369748 | -0,553050205 |
| A_33_P3829391 | BC030809        | LOC641510      | uncharacterized LOC641510                                       |                 | -0,553064544 |
| A_23_P40821   | NM_032383       | HPS3           | Hermansky-Pudlak syndrome 3                                     | ENST00000460822 | -0,553110065 |
| A_23_P209055  | NM_001771       | CD22           | CD22 molecule                                                   | ENST00000419549 | -0,553123827 |
| A_21_P0004503 | NR_034107       | LOC257396      | uncharacterized LOC257396                                       |                 | -0,553195156 |
| A_21_P0012459 | AL049161        | XLOC_I2_010338 |                                                                 |                 | -0,553217533 |
| A_24_P201171  | NM_003165       | STXBP1         | syntaxin binding protein 1                                      | ENST00000373299 | -0,553310281 |
| A_32_P942508  | NR_028336       | FAM27L         | family with sequence similarity 27-like                         | ENST00000426869 | -0,553338254 |
| A_23_P350512  | NM_021641       | ADAM12         | ADAM metallopeptidase domain 12                                 | ENST00000368676 | -0,55336145  |
| A_23_P122863  | NM_001001555    | GRB10          | growth factor receptor-bound protein 10                         | ENST00000402497 | -0,553382994 |
| A_23_P329573  | NM_000211       | ITGB2          | integrin, beta 2 (complement component 3 receptor 3 and         | ENST00000302347 | -0,553389596 |
| A_33_P3323218 | NM_024744       | ALS2CR8        | amyotrophic lateral sclerosis 2 (juvenile) chromosome region    | ENST00000320443 | -0,553471665 |
| A_21_P0014166 | XR_108672       | LOC100506379   | uncharacterized LOC100506379                                    |                 | -0,553484169 |
| A_33_P3351904 | NM_031861       | PCDHA11        | protocadherin alpha 11                                          |                 | -0,553657471 |
| A_33_P3284951 | NM_006739       | MCM5           | minichromosome maintenance complex component 5                  | ENST00000455261 | -0,55382996  |
| A_21_P0006455 | ENST00000416989 | XLOC_008184    |                                                                 | ENST00000416989 | -0,553847176 |
| A_23_P353014  | NM_172364       | CACNA2D4       | calcium channel, voltage-dependent, alpha 2/delta subunit       | ENST00000382722 | -0,553924433 |

|               |                 |                |                                                                     |                 |              |
|---------------|-----------------|----------------|---------------------------------------------------------------------|-----------------|--------------|
| A_33_P3306085 | NM_001099218    | RAD51AP2       | RAD51 associated protein 2                                          | ENST00000399080 | -0,554015916 |
| A_23_P9255    | NM_003177       | SYK            | spleen tyrosine kinase                                              | ENST00000375754 | -0,554078361 |
| A_33_P3251876 | NM_003855       | IL18R1         | interleukin 18 receptor 1                                           | ENST00000410040 | -0,554110718 |
| A_23_P112061  | NM_152419       | HGSNAT         | heparan-alpha-glucosaminide N-acetyltransferase                     | ENST00000458501 | -0,554129265 |
| A_24_P339126  | NM_144957       | PRSS21         | protease, serine, 21 (testisin)                                     | ENST00000450020 | -0,554134137 |
| A_23_P216766  | NM_030940       | ISCA1          | iron-sulfur cluster assembly 1 homolog ( <i>S. cerevisiae</i> )     | ENST00000375991 | -0,554195942 |
| A_23_P23502   | NM_001005185    | OR6N1          | olfactory receptor, family 6, subfamily N, member 1                 | ENST00000335094 | -0,554246707 |
| A_21_P0010940 | NM_001100874    | SLC9B1         | solute carrier family 9, subfamily B (cation proton antiporte       | ENST00000416231 | -0,554254897 |
| A_23_P109171  | NM_001195       | BFSP1          | beaded filament structural protein 1, filensin                      | ENST00000536626 | -0,554263927 |
| A_23_P162746  | NM_015974       | CRYL1          | crystallin, lambda 1                                                | ENST00000298248 | -0,554375269 |
| A_23_P115872  | NM_018131       | CEP55          | centrosomal protein 55kDa                                           | ENST00000371485 | -0,554405448 |
| A_23_P46936   | NM_000399       | EGR2           | early growth response 2                                             | ENST00000411732 | -0,554442871 |
| A_21_P0000746 | NR_038273       | LOC100506874   | uncharacterized LOC100506874                                        |                 | -0,554472916 |
| A_33_P3423365 | NM_001127663    | GSN            | gelsolin                                                            | ENST00000545652 | -0,554474914 |
| A_24_P56837   | NM_080863       | ASB16          | ankyrin repeat and SOCS box containing 16                           | ENST00000293414 | -0,554481949 |
| A_33_P3409274 | ENST00000454421 | LOC100134256   | ig heavy chain V-III region VH26-like                               | ENST00000454421 | -0,554528764 |
| A_33_P3383970 | NM_030956       | TLR10          | toll-like receptor 10                                               | ENST00000361424 | -0,554582955 |
| A_23_P207400  | NM_007300       | BRCA1          | breast cancer 1, early onset                                        | ENST00000412061 | -0,554802171 |
| A_23_P324523  | NM_153208       | IQCK           | IQ motif containing K                                               | ENST00000308214 | -0,554824788 |
| A_23_P43425   | NM_017998       | C9orf40        | chromosome 9 open reading frame 40                                  | ENST00000376854 | -0,554836583 |
| A_21_P0003883 | TCONS_00009007  | XLOC_003853    |                                                                     |                 | -0,554945096 |
| A_21_P0014708 | ENST00000505245 | ATP6V1E2       | ATPase, H <sup>+</sup> transporting, lysosomal 31kDa, V1 subunit E2 | ENST00000505245 | -0,554972972 |
| A_33_P3333480 | NR_026690       | ABHD11-AS1     | ABHD11 antisense RNA 1 (non-protein coding)                         | ENST00000427153 | -0,555005394 |
| A_23_P105862  | NM_023037       | FRY            | furry homolog ( <i>Drosophila</i> )                                 | ENST00000380257 | -0,555016621 |
| A_21_P0001634 | TCONS_00001843  | XLOC_001228    |                                                                     |                 | -0,555042893 |
| A_23_P23438   | NM_022367       | SEMA4A         | sema domain, immunoglobulin domain (Ig), transmembran               | ENST00000544376 | -0,555058544 |
| A_32_P56249   | NR_038996       | LOC100131733   | uncharacterized LOC100131733                                        | ENST00000478808 | -0,555096469 |
| A_33_P3225625 | NM_001003799    | TARP           | TCR gamma alternate reading frame protein                           | ENST00000443402 | -0,555162879 |
| A_21_P0010742 | ENST00000439440 | XLOC_l2_000636 |                                                                     | ENST00000439440 | -0,555181666 |

|               |                 |                |                                                               |                 |              |
|---------------|-----------------|----------------|---------------------------------------------------------------|-----------------|--------------|
| A_23_P115872  | NM_018131       | CEP55          | centrosomal protein 55kDa                                     | ENST00000371485 | -0,555197843 |
| A_33_P3316721 | NM_144585       | SLC22A12       | solute carrier family 22 (organic anion/urate transporter), n | ENST00000377574 | -0,555201906 |
| A_33_P3901921 | NM_017915       | C12orf48       | chromosome 12 open reading frame 48                           | ENST00000392914 | -0,555235939 |
| A_33_P3270489 | NM_025059       | C6orf97        | chromosome 6 open reading frame 97                            | ENST00000367290 | -0,555238306 |
| A_33_P3540143 | NM_014339       | IL17RA         | interleukin 17 receptor A                                     | ENST00000319363 | -0,55524041  |
| A_33_P3265549 | NM_001205206    | SLC19A1        | solute carrier family 19 (folate transporter), member 1       | ENST00000380014 | -0,555474576 |
| A_33_P3236798 | NM_080823       | SRMS           | src-related kinase lacking C-terminal regulatory tyrosine anc | ENST00000217188 | -0,555581584 |
| A_23_P104972  | NM_023945       | MS4A5          | membrane-spanning 4-domains, subfamily A, member 5            | ENST00000300190 | -0,555619537 |
| A_23_P106389  | NM_003612       | SEMA7A         | semaphorin 7A, GPI membrane anchor (John Milton Hagen         | ENST00000543145 | -0,55563638  |
| A_21_P0010298 | TCONS_00029173  | XLOC_014112    |                                                               |                 | -0,55563875  |
| A_23_P120860  | NM_003634       | NIPSNAP1       | nipsnap homolog 1 (C. elegans)                                | ENST00000216121 | -0,555888387 |
| A_23_P122863  | NM_001001555    | GRB10          | growth factor receptor-bound protein 10                       | ENST00000402497 | -0,556043849 |
| A_23_P73097   | NM_170587       | RGS20          | regulator of G-protein signaling 20                           | ENST00000276500 | -0,556104913 |
| A_23_P9255    | NM_003177       | SYK            | spleen tyrosine kinase                                        | ENST00000375754 | -0,556230945 |
| A_21_P0005203 | XR_108720       | LOC100507642   | uncharacterized LOC100507642                                  |                 | -0,556302435 |
| A_23_P342727  | NM_178006       | STARD13        | StAR-related lipid transfer (START) domain containing 13      | ENST00000336934 | -0,556313127 |
| A_32_P194246  | NM_015226       | CLEC16A        | C-type lectin domain family 16, member A                      | ENST00000381822 | -0,556588239 |
| A_24_P564030  | NM_183242       | BTBD8          | BTB (POZ) domain containing 8                                 | ENST00000540648 | -0,556622956 |
| A_24_P179816  | NM_024330       | SLC27A3        | solute carrier family 27 (fatty acid transporter), member 3   | ENST00000468044 | -0,556647326 |
| A_21_P0010421 | TCONS_00029614  | XLOC_014268    |                                                               |                 | -0,556648478 |
| A_21_P0010947 | ENST00000443523 | XLOC_l2_001986 |                                                               | ENST00000443523 | -0,556694993 |
| A_33_P3339825 | NM_206538       | C19orf63       | chromosome 19 open reading frame 63                           | ENST00000376920 | -0,556799182 |
| A_23_P59528   | NM_020186       | ACN9           | ACN9 homolog (S. cerevisiae)                                  | ENST00000479853 | -0,556821255 |
| A_33_P3295358 | NM_139314       | ANGPTL4        | angiopoietin-like 4                                           | ENST00000301455 | -0,556836804 |
| A_23_P105862  | NM_023037       | FRY            | furry homolog (Drosophila)                                    | ENST00000380257 | -0,556899236 |
| A_33_P3360072 | NM_001161429    | RANBP3L        | RAN binding protein 3-like                                    | ENST00000296604 | -0,556971844 |
| A_23_P352799  | NM_001099456    | NPW            | neuropeptide W                                                | ENST00000329610 | -0,557015057 |
| A_23_P212617  | NM_003234       | TFRC           | transferrin receptor (p90, CD71)                              | ENST00000392396 | -0,557274016 |
| A_23_P166459  | NM_002305       | LGALS1         | lectin, galactoside-binding, soluble, 1                       | ENST00000425542 | -0,55766911  |

|                |                 |             |                                                            |                 |              |
|----------------|-----------------|-------------|------------------------------------------------------------|-----------------|--------------|
| A_24_P14634    | NM_133455       | EMID1       | EMI domain containing 1                                    | ENST00000334018 | -0,557696583 |
| A_19_P00316820 | AK091028        | XLOC_005127 |                                                            |                 | -0,55777107  |
| A_23_P9255     | NM_003177       | SYK         | spleen tyrosine kinase                                     | ENST00000375754 | -0,557975961 |
| A_33_P3278211  | ENST00000474994 | MMRN2       | multimerin 2                                               | ENST00000474994 | -0,557982602 |
| A_33_P3332396  | NM_024587       | TMEM53      | transmembrane protein 53                                   | ENST00000372243 | -0,558107807 |
| A_23_P45059    | NM_001380       | DOCK1       | dedicator of cytokinesis 1                                 | ENST00000280333 | -0,558142131 |
| A_33_P3240936  | NM_012104       | BACE1       | beta-site APP-cleaving enzyme 1                            | ENST00000292095 | -0,558170551 |
| A_23_P20107    | NM_015917       | GSTK1       | glutathione S-transferase kappa 1                          | ENST00000494735 | -0,558177704 |
| A_21_P0001346  | TCONS_00001045  | XLOC_000306 |                                                            |                 | -0,55827487  |
| A_23_P170733   | NM_058172       | ANTXR2      | anthrax toxin receptor 2                                   | ENST00000449651 | -0,558314247 |
| A_24_P346855   | NM_002417       | MKI67       | antigen identified by monoclonal antibody Ki-67            | ENST00000537609 | -0,55846608  |
| A_24_P945113   | NM_000020       | ACVRL1      | activin A receptor type II-like 1                          | ENST00000550683 | -0,558589001 |
| A_23_P83403    | NM_014988       | LIMCH1      | LIM and calponin homology domains 1                        | ENST00000537405 | -0,558884756 |
| A_23_P250607   | NM_005032       | PLS3        | plastin 3                                                  | ENST00000481823 | -0,558970438 |
| A_33_P3270337  | ENST00000368619 | STK32C      | serine/threonine kinase 32C                                | ENST00000368619 | -0,559094091 |
| A_33_P3275055  | NM_001160011    | ST6GALNAC3  | ST6 (alpha-N-acetyl-neuraminyl-2,3-beta-galactosyl-1,3)-N- | ENST00000394994 | -0,559159332 |
| A_23_P115872   | NM_018131       | CEP55       | centrosomal protein 55kDa                                  | ENST00000371485 | -0,55923242  |
| A_23_P421032   | NM_174977       | SEC14L4     | SEC14-like 4 (S. cerevisiae)                               | ENST00000320982 | -0,559520359 |
| A_33_P3394380  | NM_004857       | AKAP5       | A kinase (PRKA) anchor protein 5                           | ENST00000394718 | -0,559581188 |
| A_23_P122508   | NM_080870       | DPCR1       | diffuse panbronchiolitis critical region 1                 | ENST00000414703 | -0,559622097 |
| A_32_P222684   | NM_001136239    | PRDM6       | PR domain containing 6                                     | ENST00000407847 | -0,559659735 |
| A_23_P122863   | NM_001001555    | GRB10       | growth factor receptor-bound protein 10                    | ENST00000402497 | -0,559701462 |
| A_23_P115872   | NM_018131       | CEP55       | centrosomal protein 55kDa                                  | ENST00000371485 | -0,559750643 |
| A_33_P3287631  | NM_147780       | CTSB        | cathepsin B                                                | ENST00000434271 | -0,559762878 |
| A_23_P157136   | NM_033128       | SCIN        | scinderin                                                  | ENST00000341757 | -0,559770526 |
| A_23_P255884   | NM_198252       | GSN         | gelsolin                                                   | ENST00000545652 | -0,559814594 |
| A_23_P210763   | NM_000214       | JAG1        | jagged 1                                                   | ENST00000254958 | -0,559817972 |
| A_24_P294842   | NM_000332       | ATXN1       | ataxin 1                                                   | ENST00000450222 | -0,559826379 |
| A_32_P157208   | NR_015423       | LOC572558   | uncharacterized LOC572558                                  | ENST00000442069 | -0,559891988 |

|                |                  |                |                                                                                         |                 |              |
|----------------|------------------|----------------|-----------------------------------------------------------------------------------------|-----------------|--------------|
| A_32_P4262     | NM_015585        | C20orf26       | chromosome 20 open reading frame 26                                                     | ENST00000389655 | -0,559918056 |
| A_23_P114061   | NM_001007471     | TRPM3          | transient receptor potential cation channel, subfamily M, member 3                      | ENST00000377110 | -0,560006213 |
| A_32_P169131   | NM_019109        | ALG1           | asparagine-linked glycosylation 1, beta-1,4-mannosyltransferase homolog (S. cerevisiae) | ENST00000377110 | -0,56001025  |
| A_21_P0010296  | THC2740132       | XLOC_014110    |                                                                                         |                 | -0,560039824 |
| A_33_P3305482  | NM_020365        | EIF2B3         | eukaryotic translation initiation factor 2B, subunit 3 gamma                            | ENST00000360403 | -0,560044369 |
| A_21_P0011125  | TCONS_I2_0000672 | XLOC_I2_003627 |                                                                                         |                 | -0,560061631 |
| A_21_P0002084  | ENST00000430551  | XLOC_002238    |                                                                                         | ENST00000430551 | -0,560138434 |
| A_33_P3217307  | ENST00000341885  | ZBTB8OS        | zinc finger and BTB domain containing 8 opposite strand                                 | ENST00000341885 | -0,560223926 |
| A_23_P151405   | NM_018204        | CKAP2          | cytoskeleton associated protein 2                                                       | ENST00000258607 | -0,560288724 |
| A_24_P225878   | NM_022342        | KIF9           | kinesin family member 9                                                                 | ENST00000452770 | -0,560324937 |
| A_23_P212617   | NM_003234        | TFRC           | transferrin receptor (p90, CD71)                                                        | ENST00000392396 | -0,560358615 |
| A_21_P0012945  | BG214557         | XLOC_I2_011627 |                                                                                         |                 | -0,560389622 |
| A_33_P3227857  | NM_173827        | COX18          | COX18 cytochrome c oxidase assembly homolog (S. cerevisiae)                             |                 | -0,56043868  |
| A_23_P122077   | NM_016591        | GCNT4          | glucosaminyl (N-acetyl) transferase 4, core 2                                           | ENST00000322348 | -0,560472707 |
| A_21_P0004773  | NR_038863        | LOC285758      | uncharacterized LOC285758                                                               |                 | -0,560508833 |
| A_32_P126557   | NM_001204424     | RGS6           | regulator of G-protein signaling 6                                                      |                 | -0,560528073 |
| A_33_P3318696  | NM_001008661     | CCBL2          | cysteine conjugate-beta lyase 2                                                         | ENST00000370486 | -0,560541263 |
| A_21_P0007087  | TCONS_00018856   | XLOC_008661    |                                                                                         |                 | -0,560635041 |
| A_21_P0008807  | THC2577654       | XLOC_011157    |                                                                                         |                 | -0,56074925  |
| A_23_P10518    | NM_016521        | TFDP3          | transcription factor Dp family, member 3                                                | ENST00000310125 | -0,560820028 |
| A_24_P13831    | NM_182854        | SNX20          | sorting nexin 20                                                                        | ENST00000413750 | -0,560841253 |
| A_24_P548866   | NM_001099668     | HIGD1A         | HIG1 hypoxia inducible domain family, member 1A                                         |                 | -0,560846753 |
| A_23_P106362   | NM_020980        | AQP9           | aquaporin 9                                                                             | ENST00000219919 | -0,561012655 |
| A_19_P00320974 | NM_001145454     | STMN1          | stathmin 1                                                                              | ENST00000513116 | -0,56104986  |
| A_21_P0013883  | NM_000216        | KAL1           | Kallmann syndrome 1 sequence                                                            | ENST00000262648 | -0,561051086 |
| A_32_P62963    | NR_029392        | KRT16P2        | keratin 16 pseudogene 2                                                                 |                 | -0,561076434 |
| A_23_P120316   | NM_006636        | MTHFD2         | methylenetetrahydrofolate dehydrogenase (NADP+ dependent)                               | ENST00000394053 | -0,561168464 |
| A_23_P101871   | NM_024907        | FBXO17         | F-box protein 17                                                                        | ENST00000292852 | -0,561287172 |
| A_23_P130753   | NM_001352        | DBP            | D site of albumin promoter (albumin D-box) binding protein                              | ENST00000222122 | -0,561429799 |



|               |                 |             |                                                            |                 |              |
|---------------|-----------------|-------------|------------------------------------------------------------|-----------------|--------------|
| A_21_P0003733 | ENST00000472346 | XLOC_003912 |                                                            | ENST00000472346 | -0,561505953 |
| A_24_P167642  | NM_000161       | GCH1        | GTP cyclohydrolase 1                                       | ENST00000254299 | -0,561522219 |
| A_21_P0009301 | TCONS_00025573  | XLOC_012398 |                                                            |                 | -0,561717764 |
| A_24_P172990  | NM_001605       | AARS        | alanyl-tRNA synthetase                                     | ENST00000261772 | -0,561855082 |
| A_24_P395814  | NM_000737       | CGB         | chorionic gonadotropin, beta polypeptide                   | ENST00000474913 | -0,561946771 |
| A_21_P0013846 | NR_015367       | LOC550643   | uncharacterized LOC550643                                  |                 | -0,561958412 |
| A_23_P117852  | NM_014736       | KIAA0101    | KIAA0101                                                   | ENST00000380258 | -0,562606869 |
| A_23_P37983   | NM_005947       | MT1B        | metallothionein 1B                                         | ENST00000334346 | -0,562686619 |
| A_24_P245815  | NM_020437       | ASPHD2      | aspartate beta-hydroxylase domain containing 2             | ENST00000215906 | -0,562752419 |
| A_33_P3271111 | NM_004148       | NINJ1       | ninjurin 1                                                 | ENST00000489274 | -0,562774239 |
| A_21_P0007338 | ENST00000532428 | APIP        | APAF1 interacting protein                                  | ENST00000532428 | -0,562791016 |
| A_23_P218597  | NM_002518       | NPAS2       | neuronal PAS domain protein 2                              | ENST00000474550 | -0,562835941 |
| A_23_P422732  | NM_145172       | WDR63       | WD repeat domain 63                                        | ENST00000294664 | -0,562837688 |
| A_24_P132276  | NM_018292       | QRSL1       | glutaminyl-tRNA synthase (glutamine-hydrolyzing)-like 1    | ENST00000369046 | -0,562913543 |
| A_23_P422724  | NM_000943       | PPIC        | peptidylprolyl isomerase C (cyclophilin C)                 | ENST00000306442 | -0,563002499 |
| A_23_P151294  | NM_000619       | IFNG        | interferon, gamma                                          | ENST00000229135 | -0,563006445 |
| A_23_P329573  | NM_000211       | ITGB2       | integrin, beta 2 (complement component 3 receptor 3 and    | ENST00000302347 | -0,563117582 |
| A_24_P53976   | NM_002065       | GLUL        | glutamate-ammonia ligase                                   | ENST00000491322 | -0,563127771 |
| A_23_P140876  | NM_001089       | ABCA3       | ATP-binding cassette, sub-family A (ABC1), member 3        | ENST00000382381 | -0,563155309 |
| A_24_P151     | NM_003636       | KCNAB2      | potassium voltage-gated channel, shaker-related subfamily, | ENST00000378092 | -0,563239764 |
| A_24_P134834  | NM_032276       | RHBDD1      | rhomboid domain containing 1                               | ENST00000392062 | -0,563288986 |
| A_33_P3352782 | NM_024562       | TMCO7       | transmembrane and coiled-coil domains 7                    | ENST00000261778 | -0,563489988 |
| A_23_P26810   | NM_000546       | TP53        | tumor protein p53                                          | ENST00000396473 | -0,563513381 |
| A_33_P3372297 | NM_001159746    | ABR         | active BCR-related gene                                    | ENST00000382259 | -0,563592969 |
| A_23_P329573  | NM_000211       | ITGB2       | integrin, beta 2 (complement component 3 receptor 3 and    | ENST00000302347 | -0,563602433 |
| A_24_P67534   | NM_001163438    | CXorf69     | chromosome X open reading frame 69                         | ENST00000330288 | -0,563621933 |
| A_23_P145984  | NM_012338       | TSPAN12     | tetraspanin 12                                             | ENST00000222747 | -0,563744408 |
| A_21_P0005310 | ENST00000418679 | XLOC_006448 |                                                            | ENST00000418679 | -0,563747428 |
| A_33_P3327479 | NM_016598       | ZDHC3       | zinc finger, DHHC-type containing 3                        | ENST00000339420 | -0,563798319 |

|               |                 |                |                                                               |                 |              |
|---------------|-----------------|----------------|---------------------------------------------------------------|-----------------|--------------|
| A_23_P109593  | NM_014346       | TBC1D22A       | TBC1 domain family, member 22A                                | ENST00000355704 | -0,563835582 |
| A_33_P3412613 | NM_001032283    | TMPO           | thymopoietin                                                  | ENST00000393053 | -0,56387222  |
| A_23_P82249   | NM_007188       | ABCB8          | ATP-binding cassette, sub-family B (MDR/TAP), member 8        | ENST00000482309 | -0,564133654 |
| A_23_P209735  | NM_025139       | ARMC9          | armadillo repeat containing 9                                 | ENST00000349938 | -0,564180396 |
| A_23_P141802  | NM_001040147    | SERPINB7       | serpin peptidase inhibitor, clade B (ovalbumin), member 7     | ENST00000540675 | -0,564184356 |
| A_21_P0012789 | ENST00000509983 | XLOC_l2_011227 |                                                               | ENST00000509983 | -0,564243595 |
| A_23_P37441   | NM_004048       | B2M            | beta-2-microglobulin                                          | ENST00000396754 | -0,564273836 |
| A_23_P152462  | NM_052874       | STX1B          | syntaxin 1B                                                   | ENST00000215095 | -0,564563813 |
| A_23_P211504  | NM_016657       | KDELR3         | KDEL (Lys-Asp-Glu-Leu) endoplasmic reticulum protein receptor | ENST00000409006 | -0,564569433 |
| A_33_P3419026 | NM_001142700    | DLG2           | discs, large homolog 2 (Drosophila)                           | ENST00000546021 | -0,564573744 |
| A_33_P3228355 | NM_001007253    | ERV3-1         | endogenous retrovirus group 3, member 1                       | ENST00000394323 | -0,564722625 |
| A_33_P3388501 | NM_003465       | CHIT1          | chitinase 1 (chitotriosidase)                                 | ENST00000491855 | -0,564809898 |
| A_21_P0004787 | ENST00000422023 | XLOC_005869    |                                                               | ENST00000422023 | -0,564810325 |
| A_23_P103672  | NM_006617       | NES            | nestin                                                        | ENST00000368223 | -0,564837635 |
| A_24_P96403   | NM_001001890    | RUNX1          | runt-related transcription factor 1                           | ENST00000344691 | -0,564983459 |
| A_21_P0003814 | TCONS_00008692  | XLOC_004205    |                                                               |                 | -0,564987419 |
| A_21_P0003669 | TCONS_00008304  | XLOC_003754    |                                                               |                 | -0,565062302 |
| A_23_P95823   | NM_145080       | NSMCE1         | non-SMC element 1 homolog (S. cerevisiae)                     | ENST00000361439 | -0,565094063 |
| A_21_P0002272 | TCONS_00003822  | XLOC_001630    |                                                               |                 | -0,565302335 |
| A_33_P3306504 | NM_016368       | ISYNA1         | inositol-3-phosphate synthase 1                               | ENST00000338128 | -0,565467166 |
| A_21_P0007607 | AW016330        | XLOC_009837    |                                                               |                 | -0,565478162 |
| A_23_P114983  | NM_032588       | TRIM63         | tripartite motif containing 63                                | ENST00000374272 | -0,565491899 |
| A_23_P26954   | NM_006373       | VAT1           | vesicle amine transport protein 1 homolog (T. californica)    | ENST00000542468 | -0,565499461 |
| A_23_P57036   | NM_001250       | CD40           | CD40 molecule, TNF receptor superfamily member 5              | ENST00000477696 | -0,565714728 |
| A_33_P3418025 | NM_001334       | CTSO           | cathepsin O                                                   | ENST00000433477 | -0,565739361 |
| A_33_P3240353 | NM_017767       | SLC39A4        | solute carrier family 39 (zinc transporter), member 4         | ENST00000276833 | -0,565777622 |
| A_23_P106922  | NM_021615       | CHST6          | carbohydrate (N-acetylglucosamine 6-O) sulfotransferase 6     | ENST00000332272 | -0,565924574 |
| A_23_P80032   | NM_005225       | E2F1           | E2F transcription factor 1                                    | ENST00000343380 | -0,565967579 |
| A_24_P184799  | NM_004086       | COCH           | coagulation factor C homolog, cochlin (Limulus polyphemus)    | ENST00000216361 | -0,566189506 |

|                |                 |              |                                                          |                 |              |
|----------------|-----------------|--------------|----------------------------------------------------------|-----------------|--------------|
| A_24_P829183   | XR_108575       | FLJ32255     | uncharacterized LOC643977                                |                 | -0,566203381 |
| A_23_P23765    | NM_014288       | ITGB3BP      | integrin beta 3 binding protein (beta3-endonexin)        | ENST00000283568 | -0,566253943 |
| A_33_P3415211  | NM_002437       | MPV17        | MpV17 mitochondrial inner membrane protein               | ENST00000426513 | -0,566322688 |
| A_24_P33446    | NR_021489       | LOC338651    | uncharacterized LOC338651                                |                 | -0,56632948  |
| A_23_P40295    | NM_012261       | C20orf103    | chromosome 20 open reading frame 103                     | ENST00000246070 | -0,566387754 |
| A_23_P3221     | NM_021199       | SQRDL        | sulfide quinone reductase-like (yeast)                   | ENST00000260324 | -0,566454387 |
| A_19_P00322173 | ENST00000454160 | XLOC_007602  |                                                          | ENST00000454160 | -0,566479635 |
| A_24_P64344    | NM_013314       | BLNK         | B-cell linker                                            | ENST00000393898 | -0,566581529 |
| A_23_P110941   | NM_001512       | GSTA4        | glutathione S-transferase alpha 4                        | ENST00000370960 | -0,566598624 |
| A_23_P57036    | NM_001250       | CD40         | CD40 molecule, TNF receptor superfamily member 5         | ENST00000477696 | -0,566878254 |
| A_33_P3382423  | NM_182498       | ZNF428       | zinc finger protein 428                                  | ENST00000300811 | -0,566998533 |
| A_33_P3236628  | ENST00000378196 | BCKDHA       | branched chain keto acid dehydrogenase E1, alpha polypep | ENST00000378196 | -0,567198584 |
| A_21_P0014667  | XR_111050       | LOC100509635 | uncharacterized LOC100509635                             |                 | -0,567239925 |
| A_21_P0008663  | THC2616036      | XLOC_011331  |                                                          |                 | -0,567372875 |
| A_23_P112554   | NM_001855       | COL15A1      | collagen, type XV, alpha 1                               | ENST00000375001 | -0,567528774 |
| A_23_P106602   | NM_031476       | CRISPLD2     | cysteine-rich secretory protein LCCL domain containing 2 | ENST00000262424 | -0,567612301 |
| A_23_P35399    | NM_145869       | ANXA11       | annexin A11                                              | ENST00000537102 | -0,567705483 |
| A_23_P120883   | NM_002133       | HMOX1        | heme oxygenase (decycling) 1                             | ENST00000216117 | -0,567764579 |
| A_23_P75769    | NM_024021       | MS4A4A       | membrane-spanning 4-domains, subfamily A, member 4       | ENST00000529991 | -0,567899159 |
| A_24_P8220     | NM_004807       | HS6ST1       | heparan sulfate 6-O-sulfotransferase 1                   | ENST00000259241 | -0,567913375 |
| A_23_P1691     | NM_002421       | MMP1         | matrix metalloproteinase 1 (interstitial collagenase)    | ENST00000315274 | -0,567915072 |
| A_21_P0002645  | ENST00000431336 | XLOC_001964  |                                                          | ENST00000431336 | -0,567948012 |
| A_23_P166248   | NM_004414       | RCAN1        | regulator of calcineurin 1                               | ENST00000443408 | -0,56803807  |
| A_33_P3352718  | ENST00000377158 | C12orf76     | chromosome 12 open reading frame 76                      | ENST00000377158 | -0,568085701 |
| A_23_P100127   | NM_170589       | CASC5        | cancer susceptibility candidate 5                        | ENST00000260369 | -0,568092824 |
| A_23_P111311   | NM_144497       | AKAP12       | A kinase (PRKA) anchor protein 12                        | ENST00000253332 | -0,568129227 |
| A_33_P3365810  | NM_002949       | MRPL12       | mitochondrial ribosomal protein L12                      | ENST00000332396 | -0,568199393 |
| A_33_P3399267  | NM_172200       | IL15RA       | interleukin 15 receptor, alpha                           | ENST00000379972 | -0,568241138 |
| A_23_P40821    | NM_032383       | HPS3         | Hermansky-Pudlak syndrome 3                              | ENST00000460822 | -0,568246405 |

|               |           |              |                                                         |                 |              |
|---------------|-----------|--------------|---------------------------------------------------------|-----------------|--------------|
| A_23_P33723   | NM_004244 | CD163        | CD163 molecule                                          | ENST00000396620 | -0,568289941 |
| A_24_P102821  | NM_000952 | PTAFR        | platelet-activating factor receptor                     | ENST00000305392 | -0,568338283 |
| A_23_P309739  | NM_000125 | ESR1         | estrogen receptor 1                                     | ENST00000206249 | -0,568432689 |
| A_23_P109593  | NM_014346 | TBC1D22A     | TBC1 domain family, member 22A                          | ENST00000355704 | -0,568578917 |
| A_23_P104996  | NM_004183 | BEST1        | bestrophin 1                                            | ENST00000524877 | -0,568607646 |
| A_21_P0014659 | XR_110932 | LOC100506678 | uncharacterized LOC100506678                            |                 | -0,568635845 |
| A_23_P117852  | NM_014736 | KIAA0101     | KIAA0101                                                | ENST00000380258 | -0,568785505 |
| A_32_P210642  | NM_201446 | EGFL7        | EGF-like-domain, multiple 7                             | ENST00000308874 | -0,569105999 |
| A_21_P0010022 | XR_109654 | LOC100505683 | uncharacterized LOC100505683                            | ENST00000442440 | -0,569236115 |
| A_21_P0014122 | XR_108500 | LOC100507375 | uncharacterized LOC100507375                            |                 | -0,569450817 |
| A_24_P498854  | NR_038231 | LOC284998    | uncharacterized LOC284998                               | ENST00000425879 | -0,569455335 |
| A_23_P107994  | NM_017854 | TMEM160      | transmembrane protein 160                               | ENST00000253047 | -0,569533618 |
| A_24_P289178  | NM_206967 | C16orf74     | chromosome 16 open reading frame 74                     | ENST00000284245 | -0,569579569 |
| A_24_P28657   | NM_015446 | AHCTF1       | AT hook containing transcription factor 1               | ENST00000391829 | -0,569707118 |
| A_24_P388433  | NM_002718 | PPP2R3A      | protein phosphatase 2, regulatory subunit B'', alpha    | ENST00000264977 | -0,569752477 |
| A_23_P117852  | NM_014736 | KIAA0101     | KIAA0101                                                | ENST00000380258 | -0,569765795 |
| A_23_P120883  | NM_002133 | HMOX1        | heme oxygenase (decycling) 1                            | ENST00000216117 | -0,569814159 |
| A_24_P126628  | NM_015257 | TMEM194A     | transmembrane protein 194A                              | ENST00000300128 | -0,56984365  |
| A_23_P117852  | NM_014736 | KIAA0101     | KIAA0101                                                | ENST00000380258 | -0,569850022 |
| A_23_P91390   | NM_000361 | THBD         | thrombomodulin                                          | ENST00000503590 | -0,569944214 |
| A_23_P125233  | NM_001299 | CNN1         | calponin 1, basic, smooth muscle                        | ENST00000252456 | -0,570058011 |
| A_23_P104996  | NM_004183 | BEST1        | bestrophin 1                                            | ENST00000524877 | -0,570197929 |
| A_23_P329573  | NM_000211 | ITGB2        | integrin, beta 2 (complement component 3 receptor 3 and | ENST00000302347 | -0,570294971 |
| A_23_P329573  | NM_000211 | ITGB2        | integrin, beta 2 (complement component 3 receptor 3 and | ENST00000302347 | -0,570326419 |
| A_33_P3250383 | NM_033133 | CNP          | 2',3'-cyclic nucleotide 3' phosphodiesterase            |                 | -0,570375866 |
| A_23_P37441   | NM_004048 | B2M          | beta-2-microglobulin                                    | ENST00000396754 | -0,570400305 |
| A_23_P87860   | NM_005593 | MYF5         | myogenic factor 5                                       | ENST00000228644 | -0,570496334 |
| A_23_P118246  | NM_016095 | GINS2        | GINS complex subunit 2 (Psf2 homolog)                   | ENST00000253462 | -0,570504784 |
| A_23_P100127  | NM_170589 | CASC5        | cancer susceptibility candidate 5                       | ENST00000260369 | -0,570518041 |

|                |                 |              |                                                             |                 |               |
|----------------|-----------------|--------------|-------------------------------------------------------------|-----------------|---------------|
| A_23_P117782   | NM_018357       | LARP6        | La ribonucleoprotein domain family, member 6                | ENST00000299213 | -0,570672357  |
| A_23_P45517    | NM_013239       | PPP2R3B      | protein phosphatase 2, regulatory subunit B", beta          | ENST00000468169 | -0,570739738  |
| A_24_P941268   | NM_007220       | CA5B         | carbonic anhydrase VB, mitochondrial                        | ENST00000318636 | -0,570743377  |
| A_23_P104996   | NM_004183       | BEST1        | bestrophin 1                                                | ENST00000524877 | -0,570914795  |
| A_33_P3216568  | ENST00000356191 | MUC5AC       | mucin 5AC, oligomeric mucus/gel-forming                     | ENST00000356191 | -0,570932779  |
| A_23_P68851    | NM_001039570    | KREMEN1      | kringle containing transmembrane protein 1                  | ENST00000400338 | -0,570958585  |
| A_23_P201747   | NM_007365       | PADI2        | peptidyl arginine deiminase, type II                        | ENST00000375486 | -0,571008951  |
| A_23_P122724   | NM_004665       | VNN2         | vanin 2                                                     | ENST00000392389 | -0,571076233  |
| A_33_P3244347  | NM_001040716    | PC           | pyruvate carboxylase                                        | ENST00000393960 | -0,571100043  |
| A_23_P141715   | NM_015476       | C18orf10     | chromosome 18 open reading frame 10                         | ENST00000334295 | -0,5711114967 |
| A_19_P00317368 | ENST00000415991 | XLOC_002612  |                                                             | ENST00000415991 | -0,571208798  |
| A_23_P329573   | NM_000211       | ITGB2        | integrin, beta 2 (complement component 3 receptor 3 and     | ENST00000302347 | -0,571349055  |
| A_33_P3225843  | NM_173463       | CCDC149      | coiled-coil domain containing 149                           | ENST00000382116 | -0,571426783  |
| A_23_P120316   | NM_006636       | MTHFD2       | methylenetetrahydrofolate dehydrogenase (NADP+ depend       | ENST00000394053 | -0,5714341    |
| A_24_P379512   | NM_005482       | PIGK         | phosphatidylinositol glycan anchor biosynthesis, class K    | ENST00000370812 | -0,571470763  |
| A_24_P74571    | NM_001002880    | CBY1         | chibby homolog 1 (Drosophila)                               | ENST00000489847 | -0,571507351  |
| A_23_P120883   | NM_002133       | HMOX1        | heme oxygenase (decycling) 1                                | ENST00000216117 | -0,571641456  |
| A_23_P40174    | NM_004994       | MMP9         | matrix metalloproteinase 9 (gelatinase B, 92kDa gelatinase, | ENST00000545925 | -0,571839439  |
| A_21_P0006917  | TCONS_00018343  | XLOC_008624  |                                                             |                 | -0,572002561  |
| A_23_P165090   | NM_024407       | NDUFS7       | NADH dehydrogenase (ubiquinone) Fe-S protein 7, 20kDa (F    | ENST00000534853 | -0,572022071  |
| A_23_P72387    | NM_001134647    | AFAP1        | actin filament associated protein 1                         | ENST00000420658 | -0,572084711  |
| A_33_P3330826  | NR_033937       | LOC100132077 | uncharacterized LOC100132077                                |                 | -0,572090422  |
| A_21_P0006504  | THC2642571      | XLOC_008005  |                                                             |                 | -0,572316407  |
| A_23_P37441    | NM_004048       | B2M          | beta-2-microglobulin                                        | ENST00000396754 | -0,572387641  |
| A_21_P0006705  | ENST00000428766 | XLOC_008619  |                                                             | ENST00000428766 | -0,572443014  |
| A_33_P3383866  | NM_016381       | TREX1        | three prime repair exonuclease 1                            | ENST00000422277 | -0,572617904  |
| A_23_P114353   | NM_032946       | NXF5         | nuclear RNA export factor 5                                 | ENST00000263032 | -0,57273382   |
| A_23_P37441    | NM_004048       | B2M          | beta-2-microglobulin                                        | ENST00000396754 | -0,572741067  |
| A_21_P0004779  | ENST00000417932 | XLOC_005851  |                                                             | ENST00000417932 | -0,572793865  |



|               |                  |                |                                                          |                 |              |
|---------------|------------------|----------------|----------------------------------------------------------|-----------------|--------------|
| A_23_P10518   | NM_016521        | TFDP3          | transcription factor Dp family, member 3                 | ENST00000310125 | -0,572914474 |
| A_33_P3526458 | BC043208         | LOC338579      | ankyrin repeat domain-containing protein 30B pseudogene  |                 | -0,57293007  |
| A_23_P130961  | NM_001972        | ELANE          | elastase, neutrophil expressed                           | ENST00000263621 | -0,572994049 |
| A_33_P3233565 | NM_000375        | UROS           | uroporphyrinogen III synthase                            | ENST00000420761 | -0,573383199 |
| A_24_P321068  | NM_001859        | SLC31A1        | solute carrier family 31 (copper transporters), member 1 | ENST00000374210 | -0,573442088 |
| A_23_P4082    | NM_006584        | CCT6B          | chaperonin containing TCP1, subunit 6B (zeta 2)          | ENST00000436961 | -0,573451751 |
| A_23_P97632   | NM_004446        | EPRS           | glutamyl-prolyl-tRNA synthetase                          | ENST00000468487 | -0,573501289 |
| A_23_P379200  | NM_175736        | FMNL3          | formin-like 3                                            | ENST00000335154 | -0,573701112 |
| A_33_P3332474 | NM_001001413     | GOLGA6L1       | golgin A6 family-like 1                                  | ENST00000424531 | -0,573706465 |
| A_23_P310582  | NM_138729        | ST7L           | suppression of tumorigenicity 7 like                     | ENST00000418497 | -0,573760084 |
| A_23_P329962  | NM_001030019     | SUN3           | Sad1 and UNC84 domain containing 3                       | ENST00000449896 | -0,573770033 |
| A_21_P0014763 | XR_132529        | LOC100652839   |                                                          |                 | -0,573884897 |
| A_23_P31721   | NM_001951        | E2F5           | E2F transcription factor 5, p130-binding                 | ENST00000517476 | -0,573969705 |
| A_33_P3623118 | AK054653         | LOC153577      | uncharacterized LOC153577                                |                 | -0,573978605 |
| A_23_P37441   | NM_004048        | B2M            | beta-2-microglobulin                                     | ENST00000396754 | -0,574035891 |
| A_21_P0011723 | TCONS_I2_0001288 | XLOC_I2_006937 |                                                          |                 | -0,574169351 |
| A_24_P38347   | NM_001386        | DPYSL2         | dihydropyrimidinase-like 2                               | ENST00000545637 | -0,574289173 |
| A_33_P3385062 | NM_024511        | HAUS3          | HAUS augmin-like complex, subunit 3                      | ENST00000243706 | -0,574375326 |
| A_23_P57036   | NM_001250        | CD40           | CD40 molecule, TNF receptor superfamily member 5         | ENST00000477696 | -0,574478926 |
| A_23_P10305   | NM_175859        | CTPS2          | CTP synthase II                                          | ENST00000380207 | -0,574569451 |
| A_23_P103877  | NM_001010847     | LRRC38         | leucine rich repeat containing 38                        | ENST00000376085 | -0,574625183 |
| A_23_P120883  | NM_002133        | HMOX1          | heme oxygenase (decycling) 1                             | ENST00000216117 | -0,574698504 |
| A_24_P208909  | NM_015271        | TRIM2          | tripartite motif containing 2                            | ENST00000338700 | -0,574881995 |
| A_23_P9255    | NM_003177        | SYK            | spleen tyrosine kinase                                   | ENST00000375754 | -0,574951907 |
| A_32_P152195  | NM_198993        | STAC2          | SH3 and cysteine rich domain 2                           | ENST00000333461 | -0,574956316 |
| A_32_P465742  | NM_003558        | PIP5K1B        | phosphatidylinositol-4-phosphate 5-kinase, type I, beta  | ENST00000265382 | -0,575052699 |
| A_23_P201979  | NM_183013        | CREM           | cAMP responsive element modulator                        | ENST00000460270 | -0,575076389 |
| A_23_P120883  | NM_002133        | HMOX1          | heme oxygenase (decycling) 1                             | ENST00000216117 | -0,575078258 |
| A_23_P59877   | NM_001444        | FABP5          | fatty acid binding protein 5 (psoriasis-associated)      | ENST00000458175 | -0,575161784 |

|               |                 |              |                                                                   |                 |              |
|---------------|-----------------|--------------|-------------------------------------------------------------------|-----------------|--------------|
| A_23_P397341  | NM_152341       | PAQR4        | progesterone and adiponectin receptor family member IV            | ENST00000293978 | -0,57526421  |
| A_21_P0009010 | TCONS_00024585  | XLOC_011880  |                                                                   |                 | -0,575375056 |
| A_23_P40174   | NM_004994       | MMP9         | matrix metalloproteinase 9 (gelatinase B, 92kDa gelatinase, ')    | ENST00000545925 | -0,575379665 |
| A_23_P120316  | NM_006636       | MTHFD2       | methylene tetrahydrofolate dehydrogenase (NADP+ dependant)        | ENST00000394053 | -0,575547918 |
| A_23_P212159  | NM_024923       | NUP210       | nucleoporin 210kDa                                                | ENST00000254508 | -0,575738197 |
| A_33_P3422404 | NM_032501       | ACSS1        | acyl-CoA synthetase short-chain family member 1                   | ENST00000376726 | -0,575740509 |
| A_33_P3321025 | NM_020911       | PLXNA4       | plexin A4                                                         | ENST00000359827 | -0,575757166 |
| A_33_P3363425 | NM_174938       | FRMD3        | FERM domain containing 3                                          | ENST00000304195 | -0,575821052 |
| A_23_P139471  | NM_001029       | RPS26        | ribosomal protein S26                                             | ENST00000552361 | -0,575825183 |
| A_23_P153853  | NM_001398       | ECH1         | enoyl CoA hydratase 1, peroxisomal                                | ENST00000221418 | -0,575914063 |
| A_33_P3240687 | XM_002343311    | LOC100287326 | uncharacterized LOC100287326                                      |                 | -0,575931888 |
| A_23_P103864  | NM_024525       | TTC13        | tetratricopeptide repeat domain 13                                | ENST00000414259 | -0,575968711 |
| A_24_P163237  | NM_020225       | STOX2        | storkhead box 2                                                   | ENST00000506529 | -0,575993316 |
| A_21_P0008283 | AX721190        | XLOC_011104  |                                                                   |                 | -0,576062216 |
| A_33_P3415191 | NM_005603       | ATP8B1       | ATPase, aminophospholipid transporter, class I, type 8B, membrane | ENST00000536015 | -0,576107348 |
| A_23_P21560   | NM_030797       | FAM49A       | family with sequence similarity 49, member A                      | ENST00000406434 | -0,576122856 |
| A_23_P96369   | NM_018015       | CXorf57      | chromosome X open reading frame 57                                | ENST00000372544 | -0,576404512 |
| A_23_P122052  | NM_001008397    | GPX8         | glutathione peroxidase 8 (putative)                               | ENST00000503787 | -0,57658377  |
| A_23_P133956  | NM_002263       | KIFC1        | kinesin family member C1                                          | ENST00000480346 | -0,576647298 |
| A_23_P167227  | NM_005327       | HADH         | hydroxyacyl-CoA dehydrogenase                                     | ENST00000505878 | -0,576676253 |
| A_23_P57036   | NM_001250       | CD40         | CD40 molecule, TNF receptor superfamily member 5                  | ENST00000477696 | -0,576686667 |
| A_23_P88904   | NM_002528       | NTHL1        | nth endonuclease III-like 1 (E. coli)                             | ENST00000219066 | -0,576741312 |
| A_23_P37441   | NM_004048       | B2M          | beta-2-microglobulin                                              | ENST00000396754 | -0,576757481 |
| A_23_P9255    | NM_003177       | SYK          | spleen tyrosine kinase                                            | ENST00000375754 | -0,576812012 |
| A_23_P104996  | NM_004183       | BEST1        | bestrophin 1                                                      | ENST00000524877 | -0,576932683 |
| A_23_P52219   | NM_006459       | ERLIN1       | ER lipid raft associated 1                                        | ENST00000370410 | -0,57727699  |
| A_21_P0008461 | ENST00000557581 | XLOC_011068  |                                                                   | ENST00000557581 | -0,577476552 |
| A_33_P3262694 | XR_132608       | LOC647086    | chromosome 20 open reading frame 27 pseudogene                    |                 | -0,577883291 |
| A_23_P13907   | NM_000618       | IGF1         | insulin-like growth factor 1 (somatomedin C)                      | ENST00000481539 | -0,578020866 |

|               |                 |                |                                                                |                 |              |
|---------------|-----------------|----------------|----------------------------------------------------------------|-----------------|--------------|
| A_24_P76649   | NM_198281       | GPRIN3         | GPRIN family member 3                                          | ENST00000333209 | -0,578033909 |
| A_23_P116091  | NM_130443       | DPP3           | dipeptidyl-peptidase 3                                         | ENST00000543807 | -0,578126185 |
| A_23_P103511  | NM_001085375    | C1orf226       | chromosome 1 open reading frame 226                            | ENST00000458626 | -0,578159196 |
| A_23_P122724  | NM_004665       | VNN2           | vanin 2                                                        | ENST00000392389 | -0,578255181 |
| A_23_P134295  | NM_198949       | NUDT1          | nudix (nucleoside diphosphate linked moiety X)-type motif      | ENST00000397049 | -0,578267595 |
| A_32_P83049   | NM_014971       | EFR3B          | EFR3 homolog B ( <i>S. cerevisiae</i> )                        |                 | -0,578287103 |
| A_23_P10305   | NM_175859       | CTPS2          | CTP synthase II                                                | ENST00000380207 | -0,578396682 |
| A_33_P3317979 | NM_001080467    | MYO5B          | myosin VB                                                      | ENST00000285039 | -0,578444918 |
| A_23_P100539  | NM_001171       | ABCC6          | ATP-binding cassette, sub-family C (CFTR/MRP), member 6        | ENST00000205558 | -0,578542646 |
| A_33_P3414907 | NM_001200050    | NPL            | N-acetylneuraminatase pyruvate lyase (dihydrodipicolinate sy   | ENST00000367555 | -0,578566659 |
| A_32_P170925  | NM_052883       | TXNRD3         | thioredoxin reductase 3                                        | ENST00000523403 | -0,57857812  |
| A_33_P3284939 | NM_199129       | TMEM189        | transmembrane protein 189                                      | ENST00000371652 | -0,578683104 |
| A_23_P501985  | NM_172249       | CSF2RA         | colony stimulating factor 2 receptor, alpha, low-affinity (gra | ENST00000419094 | -0,578727189 |
| A_21_P0012110 | THC2684837      | XLOC_I2_008546 |                                                                |                 | -0,578732932 |
| A_33_P3816042 | NR_027714       | ACTR3BP2       | ARP3 actin-related protein 3 homolog B (yeast) pseudogene      | ENST00000421366 | -0,57874033  |
| A_33_P3346663 | NM_004069       | AP2S1          | adaptor-related protein complex 2, sigma 1 subunit             | ENST00000263270 | -0,578777104 |
| A_23_P149494  | NM_015600       | ABHD12         | abhydrolase domain containing 12                               | ENST00000491682 | -0,578808726 |
| A_23_P103617  | NM_003568       | ANXA9          | annexin A9                                                     | ENST00000368947 | -0,578962943 |
| A_21_P0008223 | TCONS_00022124  | XLOC_010732    |                                                                |                 | -0,579027131 |
| A_23_P106362  | NM_020980       | AQP9           | aquaporin 9                                                    | ENST00000219919 | -0,579116598 |
| A_33_P3243230 | ENST00000401931 | IL8            | interleukin 8                                                  | ENST00000401931 | -0,579131135 |
| A_21_P0009082 | TCONS_00024759  | XLOC_012043    |                                                                |                 | -0,579132554 |
| A_24_P26897   | NM_005539       | INPP5A         | inositol polyphosphate-5-phosphatase, 40kDa                    | ENST00000368594 | -0,579202318 |
| A_24_P217904  | NM_033502       | TRERF1         | transcriptional regulating factor 1                            | ENST00000372922 | -0,579314928 |
| A_24_P148811  | NM_003707       | RUVBL1         | RuvB-like 1 ( <i>E. coli</i> )                                 | ENST00000417360 | -0,579363299 |
| A_23_P329573  | NM_000211       | ITGB2          | integrin, beta 2 (complement component 3 receptor 3 and        | ENST00000302347 | -0,579409888 |
| A_33_P3327200 | NM_001001396    | ATP2B4         | ATPase, Ca <sup>++</sup> transporting, plasma membrane 4       | ENST00000341360 | -0,57941416  |
| A_21_P0013246 | NM_030570       | UPK3B          | uroplakin 3B                                                   | ENST00000490360 | -0,579437076 |
| A_23_P120316  | NM_006636       | MTHFD2         | methylenetetrahydrofolate dehydrogenase (NADP+ depend          | ENST00000394053 | -0,579505325 |

|               |                 |              |                                                                    |                 |              |
|---------------|-----------------|--------------|--------------------------------------------------------------------|-----------------|--------------|
| A_23_P348767  | NM_213631       | C20orf132    | chromosome 20 open reading frame 132                               | ENST00000400440 | -0,579611613 |
| A_23_P9255    | NM_003177       | SYK          | spleen tyrosine kinase                                             | ENST00000375754 | -0,579632346 |
| A_23_P64721   | NM_006018       | HCAR3        | hydroxycarboxylic acid receptor 3                                  | ENST00000528880 | -0,579652579 |
| A_23_P1691    | NM_002421       | MMP1         | matrix metalloproteinase 1 (interstitial collagenase)              | ENST00000315274 | -0,579666159 |
| A_21_P0004082 | ENST00000521116 | HNRNPH1      | heterogeneous nuclear ribonucleoprotein H1 (H)                     | ENST00000521116 | -0,579689306 |
| A_33_P3249649 | NR_038865       | C19orf29-AS1 | C19orf29 antisense RNA 1 (non-protein coding)                      |                 | -0,579751276 |
| A_33_P3210099 | NM_020778       | ALPK3        | alpha-kinase 3                                                     | ENST00000258888 | -0,579789737 |
| A_21_P0009908 | ENST00000431460 | XLOC_013787  |                                                                    | ENST00000431460 | -0,579792167 |
| A_23_P120316  | NM_006636       | MTHFD2       | methylenetetrahydrofolate dehydrogenase (NADP+ dependant)          | ENST00000394053 | -0,579858015 |
| A_33_P3262758 | NM_030930       | UNC93B1      | unc-93 homolog B1 (C. elegans)                                     | ENST00000227471 | -0,579897798 |
| A_23_P380857  | NM_030643       | APOL4        | apolipoprotein L, 4                                                | ENST00000479929 | -0,58015146  |
| A_24_P384029  | XR_132490       | LOC100130171 | hematological and neurological expressed 1 pseudogene              |                 | -0,58023035  |
| A_24_P69538   | NM_138554       | TLR4         | toll-like receptor 4                                               | ENST00000472304 | -0,580341008 |
| A_21_P0004869 | NR_038929       | LOC100131289 | uncharacterized LOC100131289                                       |                 | -0,580349531 |
| A_32_P204676  | NM_001444       | FABP5        | fatty acid binding protein 5 (psoriasis-associated)                | ENST00000486269 | -0,580355277 |
| A_23_P120316  | NM_006636       | MTHFD2       | methylenetetrahydrofolate dehydrogenase (NADP+ dependant)          | ENST00000394053 | -0,580475327 |
| A_21_P0011821 | NM_207328       | GPAT2        | glycerol-3-phosphate acyltransferase 2, mitochondrial              | ENST00000471661 | -0,580484675 |
| A_23_P329573  | NM_000211       | ITGB2        | integrin, beta 2 (complement component 3 receptor 3 and 4)         | ENST00000302347 | -0,580728562 |
| A_33_P3705907 | NM_058190       | FAM207A      | family with sequence similarity 207, member A                      | ENST00000479127 | -0,580834063 |
| A_33_P3340025 | NM_021067       | GINS1        | GINS complex subunit 1 (Psf1 homolog)                              | ENST00000262460 | -0,580888198 |
| A_23_P102950  | NM_080860       | RSPH1        | radial spoke head 1 homolog (Chlamydomonas)                        | ENST00000493019 | -0,580941107 |
| A_23_P157865  | NM_002160       | TNC          | tenascin C                                                         | ENST00000350763 | -0,580969571 |
| A_23_P112846  | NM_001144978    | MTHFD2L      | methylenetetrahydrofolate dehydrogenase (NADP+ dependant)          | ENST00000492183 | -0,580980041 |
| A_23_P122863  | NM_001001555    | GRB10        | growth factor receptor-bound protein 10                            | ENST00000402497 | -0,581045142 |
| A_23_P122052  | NM_001008397    | GPX8         | glutathione peroxidase 8 (putative)                                | ENST00000503787 | -0,581197988 |
| A_33_P3259183 | NM_001017961    | FAM78B       | family with sequence similarity 78, member B                       | ENST00000338353 | -0,581211508 |
| A_23_P39931   | NM_003494       | DYSF         | dysferlin, limb girdle muscular dystrophy 2B (autosomal recessive) | ENST00000413539 | -0,58130491  |
| A_23_P122052  | NM_001008397    | GPX8         | glutathione peroxidase 8 (putative)                                | ENST00000503787 | -0,581354389 |
| A_21_P0007065 | ENST00000433152 | XLOC_008501  |                                                                    | ENST00000433152 | -0,581514312 |

|                |                 |                |                                                                       |                 |              |
|----------------|-----------------|----------------|-----------------------------------------------------------------------|-----------------|--------------|
| A_23_P171095   | NM_001145073    | USP27X         | ubiquitin specific peptidase 27, X-linked                             |                 | -0,581562439 |
| A_23_P200396   | NM_019118       | TMEM234        | transmembrane protein 234                                             | ENST00000484490 | -0,581643894 |
| A_33_P3328360  | NR_027033       | MIRLET7BHG     | MIRLET7B host gene (non-protein coding)                               | ENST00000360737 | -0,581797591 |
| A_23_P134477   | NM_032350       | C7orf50        | chromosome 7 open reading frame 50                                    | ENST00000397098 | -0,581827303 |
| A_23_P336644   | NM_145034       | TOR1AIP2       | torsin A interacting protein 2                                        | ENST00000367612 | -0,581838866 |
| A_23_P307968   | NM_052836       | CDH23          | cadherin-related 23                                                   | ENST00000398842 | -0,581961531 |
| A_33_P3407469  | NM_020884       | MYH7B          | myosin, heavy chain 7B, cardiac muscle, beta                          | ENST00000262873 | -0,582011944 |
| A_23_P37441    | NM_004048       | B2M            | beta-2-microglobulin                                                  | ENST00000396754 | -0,582020975 |
| A_24_P344516   | NR_003578       | ZNF702P        | zinc finger protein 702, pseudogene                                   | ENST00000270443 | -0,582310991 |
| A_24_P287974   | NM_017949       | CUEDC1         | CUE domain containing 1                                               | ENST00000360238 | -0,582439036 |
| A_33_P3364626  | ENST00000343105 | TMEM194B       | transmembrane protein 194B                                            | ENST00000343105 | -0,582475582 |
| A_33_P3872301  | BF570763        | SNAR-C3        | small ILF3/NF90-associated RNA C3                                     |                 | -0,582611209 |
| A_19_P00315717 | NM_001145191    | FAM200B        |                                                                       | ENST00000502502 | -0,582831466 |
| A_23_P122863   | NM_001001555    | GRB10          | growth factor receptor-bound protein 10                               | ENST00000402497 | -0,582833047 |
| A_23_P117852   | NM_014736       | KIAA0101       | KIAA0101                                                              | ENST00000380258 | -0,582862258 |
| A_33_P3383326  | NM_057159       | LPAR1          | lysophosphatidic acid receptor 1                                      | ENST00000374430 | -0,582871269 |
| A_33_P3711426  | BM926530        | SNHG8          | small nucleolar RNA host gene 8 (non-protein coding)                  |                 | -0,582903685 |
| A_33_P3231297  | NM_003851       | CREG1          | cellular repressor of E1A-stimulated genes 1                          | ENST00000370509 | -0,582934412 |
| A_33_P3407835  | NM_144641       | PPM1M          | protein phosphatase, Mg <sup>2+</sup> /Mn <sup>2+</sup> dependent, 1M | ENST00000296487 | -0,582938709 |
| A_21_P0003033  | TCONS_00006230  | XLOC_002821    |                                                                       |                 | -0,583052384 |
| A_24_P256692   | NM_198551       | MIA3           | melanoma inhibitory activity family, member 3                         | ENST00000344441 | -0,583072204 |
| A_33_P3250963  | NR_015381       | TP53TG1        | TP53 target 1 (non-protein coding)                                    |                 | -0,58309184  |
| A_21_P0001556  | THC2764105      | XLOC_000939    |                                                                       |                 | -0,583115705 |
| A_21_P0002261  | TCONS_00003800  | XLOC_001595    |                                                                       |                 | -0,583128427 |
| A_23_P9255     | NM_003177       | SYK            | spleen tyrosine kinase                                                | ENST00000375754 | -0,583141813 |
| A_21_P0012349  | ENST00000456279 | XLOC_l2_009492 |                                                                       | ENST00000456279 | -0,583201289 |
| A_24_P657226   | NM_139173       | SLC9B1         | solute carrier family 9, subfamily B (cation proton antiporte         | ENST00000416231 | -0,583229265 |
| A_24_P13381    | NM_147204       | TRPV4          | transient receptor potential cation channel, subfamily V, m           | ENST00000536838 | -0,583312134 |
| A_23_P122863   | NM_001001555    | GRB10          | growth factor receptor-bound protein 10                               | ENST00000402497 | -0,583353395 |



|               |                |              |                                                             |                 |              |
|---------------|----------------|--------------|-------------------------------------------------------------|-----------------|--------------|
| A_23_P57036   | NM_001250      | CD40         | CD40 molecule, TNF receptor superfamily member 5            | ENST00000477696 | -0,583740408 |
| A_24_P238499  | NM_001012716   | C18orf56     | chromosome 18 open reading frame 56                         | ENST00000323813 | -0,583927757 |
| A_24_P296808  | NM_018215      | PNMAL1       | PNMA-like 1                                                 | ENST00000313683 | -0,583989952 |
| A_24_P120115  | NM_003879      | CFLAR        | CASP8 and FADD-like apoptosis regulator                     | ENST00000340870 | -0,584150127 |
| A_23_P120883  | NM_002133      | HMOX1        | heme oxygenase (decycling) 1                                | ENST00000216117 | -0,58441081  |
| A_23_P216966  | NM_000962      | PTGS1        | prostaglandin-endoperoxide synthase 1 (prostaglandin G/H    | ENST00000223423 | -0,584480524 |
| A_23_P104996  | NM_004183      | BEST1        | bestrophin 1                                                | ENST00000524877 | -0,584481554 |
| A_23_P258912  | NM_003970      | MYOM2        | myomesin (M-protein) 2, 165kDa                              | ENST00000520298 | -0,584506139 |
| A_32_P135243  | NM_015440      | MTHFD1L      | methylenetetrahydrofolate dehydrogenase (NADP+ depend       | ENST00000412301 | -0,58457611  |
| A_23_P406521  | NM_178460      | SIRPD        | signal-regulatory protein delta                             | ENST00000381623 | -0,584754338 |
| A_23_P122863  | NM_001001555   | GRB10        | growth factor receptor-bound protein 10                     | ENST00000402497 | -0,584792164 |
| A_33_P3415052 | NM_001172292   | NIPAL4       | NIPA-like domain containing 4                               |                 | -0,584855992 |
| A_33_P3375368 | NM_001195381   | GPR35        | G protein-coupled receptor 35                               | ENST00000407714 | -0,584863565 |
| A_24_P296254  | NM_014783      | ARHGAP11A    | Rho GTPase activating protein 11A                           | ENST00000361627 | -0,584870118 |
| A_24_P41864   | NM_006125      | ARHGAP6      | Rho GTPase activating protein 6                             | ENST00000380732 | -0,585026381 |
| A_23_P120883  | NM_002133      | HMOX1        | heme oxygenase (decycling) 1                                | ENST00000216117 | -0,585129919 |
| A_23_P24616   | NM_170601      | SIAE         | sialic acid acetyltransferase                               | ENST00000545756 | -0,585141418 |
| A_23_P10518   | NM_016521      | TFDP3        | transcription factor Dp family, member 3                    | ENST00000310125 | -0,58514685  |
| A_23_P215634  | NM_001013398   | IGFBP3       | insulin-like growth factor binding protein 3                | ENST00000438491 | -0,585189447 |
| A_21_P0000616 | NR_033942      | LOC728377    | Rho guanine nucleotide exchange factor (GEF) 5 pseudogene   |                 | -0,585275951 |
| A_32_P195401  | NM_173511      | FAM117B      | family with sequence similarity 117, member B               | ENST00000303116 | -0,585301456 |
| A_21_P0000661 | NR_036536      | SNHG4        | small nucleolar RNA host gene 4 (non-protein coding)        | ENST00000507197 | -0,585452167 |
| A_21_P0013470 | NR_027425      | FAM66D       | family with sequence similarity 66, member D                | ENST00000434078 | -0,585473525 |
| A_23_P40174   | NM_004994      | MMP9         | matrix metalloproteinase 9 (gelatinase B, 92kDa gelatinase, | ENST00000545925 | -0,585484395 |
| A_24_P276932  | NM_001039362   | ATP6V1C2     | ATPase, H+ transporting, lysosomal 42kDa, V1 subunit C2     | ENST00000381661 | -0,585490373 |
| A_23_P40718   | NM_001003828   | PARVB        | parvin, beta                                                | ENST00000406477 | -0,585715816 |
| A_24_P196384  | XR_132594      | LOC100129502 | uncharacterized LOC100129502                                |                 | -0,585824846 |
| A_33_P3224206 | XM_001719118   | LOC100130800 | uncharacterized LOC100130800                                | ENST00000443008 | -0,585825503 |
| A_21_P0001686 | TCONS_00002054 | XLOC_000236  |                                                             |                 | -0,585842107 |

|                |                 |                |                                                              |                 |              |
|----------------|-----------------|----------------|--------------------------------------------------------------|-----------------|--------------|
| A_32_P44568    | NM_005566       | LDHA           | lactate dehydrogenase A                                      | ENST00000543695 | -0,586071474 |
| A_21_P0007024  | TCONS_00018618  | XLOC_008968    |                                                              |                 | -0,586083698 |
| A_23_P113393   | NM_017413       | APLN           | apelin                                                       | ENST00000307484 | -0,586084129 |
| A_23_P103864   | NM_024525       | TTC13          | tetratricopeptide repeat domain 13                           | ENST00000414259 | -0,586093764 |
| A_19_P00322968 | NR_038955       | LOC100506190   | uncharacterized LOC100506190                                 |                 | -0,586125401 |
| A_33_P3367596  | NM_001830       | CLCN4          | chloride channel 4                                           | ENST00000380829 | -0,586293712 |
| A_33_P3734378  | NR_027118       | LOC285954      | uncharacterized LOC285954                                    | ENST00000415848 | -0,586436529 |
| A_23_P141429   | NM_016428       | ABI3           | ABI family, member 3                                         | ENST00000419580 | -0,586959488 |
| A_33_P3413701  | NM_001040458    | ERAP1          | endoplasmic reticulum aminopeptidase 1                       | ENST00000443439 | -0,586978132 |
| A_33_P3257297  | NM_001008723    | CCDC147        | coiled-coil domain containing 147                            | ENST00000369704 | -0,587020825 |
| A_23_P70634    | NM_002511       | NMBR           | neuromedin B receptor                                        | ENST00000258042 | -0,587059099 |
| A_23_P155989   | NM_022145       | CENPK          | centromere protein K                                         | ENST00000242872 | -0,587103524 |
| A_23_P16469    | NM_001005377    | PLAUR          | plasminogen activator, urokinase receptor                    | ENST00000221264 | -0,587215225 |
| A_23_P133123   | NM_032117       | MND1           | meiotic nuclear divisions 1 homolog ( <i>S. cerevisiae</i> ) | ENST00000240488 | -0,587239634 |
| A_23_P115872   | NM_018131       | CEP55          | centrosomal protein 55kDa                                    | ENST00000371485 | -0,58732129  |
| A_23_P502170   | NM_015522       | DYNC2LI1       | dynein, cytoplasmic 2, light intermediate chain 1            | ENST00000479242 | -0,587759073 |
| A_23_P120883   | NM_002133       | HMOX1          | heme oxygenase (decycling) 1                                 | ENST00000216117 | -0,587839735 |
| A_23_P121533   | NM_012445       | SPON2          | spondin 2, extracellular matrix protein                      | ENST00000431380 | -0,58798915  |
| A_33_P3344831  | NM_018004       | TMEM45A        | transmembrane protein 45A                                    | ENST00000489060 | -0,587997506 |
| A_21_P0012162  | ENST00000412405 | XLOC_I2_008760 |                                                              | ENST00000412405 | -0,588025759 |
| A_33_P3361067  | NM_004827       | ABCG2          | ATP-binding cassette, sub-family G (WHITE), member 2         | ENST00000237612 | -0,588103049 |
| A_33_P3333272  | NM_001204210    | TMEM235        | transmembrane protein 235                                    | ENST00000374946 | -0,588139367 |
| A_23_P105862   | NM_023037       | FRY            | furry homolog ( <i>Drosophila</i> )                          | ENST00000380257 | -0,58836809  |
| A_23_P119778   | NM_020342       | SLC39A10       | solute carrier family 39 (zinc transporter), member 10       | ENST00000409086 | -0,588387834 |
| A_23_P122077   | NM_016591       | GCNT4          | glucosaminyl (N-acetyl) transferase 4, core 2                | ENST00000322348 | -0,588403162 |
| A_21_P0004315  | TCONS_00010141  | XLOC_004606    |                                                              |                 | -0,588647345 |
| A_23_P371410   | NM_207578       | PRKACB         | protein kinase, cAMP-dependent, catalytic, beta              | ENST00000370680 | -0,588688562 |
| A_23_P37441    | NM_004048       | B2M            | beta-2-microglobulin                                         | ENST00000396754 | -0,588729159 |
| A_33_P3396527  | NM_006467       | POLR3G         | polymerase (RNA) III (DNA directed) polypeptide G (32kD)     | ENST00000399107 | -0,588793637 |

|                |                  |                |                                                                              |                                 |
|----------------|------------------|----------------|------------------------------------------------------------------------------|---------------------------------|
| A_23_P40174    | NM_004994        | MMP9           | matrix metalloproteinase 9 (gelatinase B, 92kDa gelatinase, 'ENST00000545925 | -0,588824901                    |
| A_21_P0012446  | TCONS_I2_0001935 | XLOC_I2_010239 |                                                                              | -0,588857725                    |
| A_24_P204244   | NR_001562        | ANXA2P1        | annexin A2 pseudogene 1                                                      | -0,588866359                    |
| A_23_P26810    | NM_000546        | TP53           | tumor protein p53                                                            | ENST00000396473<br>-0,588962134 |
| A_23_P102471   | NM_000251        | MSH2           | mutS homolog 2, colon cancer, nonpolyposis type 1 (E. coli)                  | ENST00000543555<br>-0,589020616 |
| A_24_P832426   | NM_194318        | B3GALT         | beta 1,3-galactosyltransferase-like                                          | ENST00000343307<br>-0,58904703  |
| A_33_P3350621  | NM_001111101     | CNRIP1         | cannabinoid receptor interacting protein 1                                   | ENST00000409559<br>-0,589078586 |
| A_23_P50946    | NM_005855        | RAMP1          | receptor (G protein-coupled) activity modifying protein 1                    | ENST00000254661<br>-0,58914596  |
| A_23_P97990    | NM_002775        | HTRA1          | HtrA serine peptidase 1                                                      | ENST00000435263<br>-0,589260206 |
| A_23_P104996   | NM_004183        | BEST1          | bestrophin 1                                                                 | ENST00000524877<br>-0,589351193 |
| A_21_P0013574  | NM_001242767     | MTHFD1L        | methylenetetrahydrofolate dehydrogenase (NADP+ depend                        | ENST00000432011<br>-0,589357273 |
| A_33_P3745146  | NM_001098517     | CADM1          | cell adhesion molecule 1                                                     | ENST00000541434<br>-0,589432165 |
| A_23_P126735   | NM_000572        | IL10           | interleukin 10                                                               | ENST00000423557<br>-0,589448332 |
| A_23_P106389   | NM_003612        | SEMA7A         | semaphorin 7A, GPI membrane anchor (John Milton Hagen                        | ENST00000543145<br>-0,589531668 |
| A_23_P40821    | NM_032383        | HPS3           | Hermansky-Pudlak syndrome 3                                                  | ENST00000460822<br>-0,589626889 |
| A_19_P00317431 | NR_027103        | LOC285375      | uncharacterized LOC285375                                                    | ENST00000419618<br>-0,589731995 |
| A_23_P157875   | NM_002003        | FCN1           | ficolin (collagen/fibrinogen domain containing) 1                            | ENST00000308299<br>-0,589785168 |
| A_23_P114210   | NM_000307        | POU3F4         | POU class 3 homeobox 4                                                       | ENST00000373200<br>-0,589800783 |
| A_23_P119778   | NM_020342        | SLC39A10       | solute carrier family 39 (zinc transporter), member 10                       | ENST00000409086<br>-0,590118366 |
| A_33_P3330608  | NM_032152        | PRAM1          | PML-RARA regulated adaptor molecule 1                                        | ENST00000255612<br>-0,590168845 |
| A_23_P104996   | NM_004183        | BEST1          | bestrophin 1                                                                 | ENST00000524877<br>-0,590301527 |
| A_24_P6674     | NM_001012361     | WDR31          | WD repeat domain 31                                                          | ENST00000341761<br>-0,590333446 |
| A_23_P37441    | NM_004048        | B2M            | beta-2-microglobulin                                                         | ENST00000396754<br>-0,59046822  |
| A_33_P3313110  | NM_024690        | MUC16          | mucin 16, cell surface associated                                            | ENST00000397910<br>-0,590478705 |
| A_23_P316637   | NM_178463        | C20orf166      | chromosome 20 open reading frame 166                                         | ENST00000370524<br>-0,590503929 |
| A_23_P316812   | NR_002796        | AKR7A2P1       | aldo-keto reductase family 7, member A2 pseudogene 1                         | -0,590557158                    |
| A_23_P137391   | NM_001428        | ENO1           | enolase 1, (alpha)                                                           | ENST00000464920<br>-0,590582972 |
| A_24_P303594   | NM_001040135     | ACTR3B         | ARP3 actin-related protein 3 homolog B (yeast)                               | ENST00000468919<br>-0,590591018 |
| A_33_P3273436  | NM_138801        | GALM           | galactose mutarotase (aldose 1-epimerase)                                    | ENST00000272252<br>-0,590743565 |

|                |                 |              |                                                                |                 |              |
|----------------|-----------------|--------------|----------------------------------------------------------------|-----------------|--------------|
| A_23_P90855    | NM_014808       | FARP2        | FERM, RhoGEF and pleckstrin domain protein 2                   | ENST00000470617 | -0,590775877 |
| A_23_P113393   | NM_017413       | APLN         | apelin                                                         | ENST00000307484 | -0,590974975 |
| A_24_P345846   | NM_058172       | ANTXR2       | anthrax toxin receptor 2                                       | ENST00000295465 | -0,590998416 |
| A_23_P102988   | NM_006440       | TXNRD2       | thioredoxin reductase 2                                        | ENST00000471149 | -0,591043759 |
| A_23_P18692    | NM_000671       | ADH5         | alcohol dehydrogenase 5 (class III), chi polypeptide           | ENST00000296412 | -0,591047629 |
| A_23_P46025    | NM_018208       | ETNK2        | ethanolamine kinase 2                                          | ENST00000367198 | -0,591090087 |
| A_24_P263653   | NM_004946       | DOCK2        | dedicator of cytokinesis 2                                     | ENST00000343291 | -0,591113629 |
| A_24_P313180   | ENST00000256319 | C14orf1      | chromosome 14 open reading frame 1                             | ENST00000256319 | -0,591244198 |
| A_24_P287043   | NM_006435       | IFITM2       | interferon induced transmembrane protein 2 (1-8D)              | ENST00000527146 | -0,591282471 |
| A_23_P40174    | NM_004994       | MMP9         | matrix metalloproteinase 9 (gelatinase B, 92kDa gelatinase, ') | ENST00000545925 | -0,591458708 |
| A_33_P3347452  | NM_021135       | RPS6KA2      | ribosomal protein S6 kinase, 90kDa, polypeptide 2              | ENST00000510118 | -0,591552188 |
| A_33_P3317005  | NM_000578       | SLC11A1      | solute carrier family 11 (proton-coupled divalent metal ion    | ENST00000486451 | -0,591839799 |
| A_19_P00318904 | XR_108784       | LOC100507525 |                                                                |                 | -0,591901748 |
| A_21_P0003384  | ENST00000514327 | XLOC_003631  |                                                                | ENST00000514327 | -0,592014552 |
| A_21_P0010210  | ENST00000428410 | XLOC_014099  |                                                                | ENST00000428410 | -0,592015076 |
| A_33_P3320772  | NM_000332       | ATXN1        | ataxin 1                                                       | ENST00000450222 | -0,592189124 |
| A_21_P0005539  | TCONS_00014003  | XLOC_006644  |                                                                |                 | -0,592251489 |
| A_23_P203665   | NM_018367       | ACER3        | alkaline ceramidase 3                                          | ENST00000544113 | -0,592253039 |
| A_19_P00322962 | NR_027139       | SPIN3        | spindlin family, member 3                                      | ENST00000475785 | -0,592256139 |
| A_23_P120883   | NM_002133       | HMOX1        | heme oxygenase (decycling) 1                                   | ENST00000216117 | -0,592276244 |
| A_23_P1691     | NM_002421       | MMP1         | matrix metalloproteinase 1 (interstitial collagenase)          | ENST00000315274 | -0,592322967 |
| A_23_P34597    | NM_001785       | CDA          | cytidine deaminase                                             | ENST00000461985 | -0,592528266 |
| A_21_P0012147  | NR_038337       | LOC100505783 | uncharacterized LOC100505783                                   |                 | -0,592672856 |
| A_23_P111737   | NM_005856       | RAMP3        | receptor (G protein-coupled) activity modifying protein 3      | ENST00000242249 | -0,59271526  |
| A_23_P37441    | NM_004048       | B2M          | beta-2-microglobulin                                           | ENST00000396754 | -0,592730893 |
| A_23_P121533   | NM_012445       | SPON2        | spondin 2, extracellular matrix protein                        | ENST00000431380 | -0,592762946 |
| A_23_P127915   | NM_030906       | STK33        | serine/threonine kinase 33                                     | ENST00000486305 | -0,592824452 |
| A_23_P40174    | NM_004994       | MMP9         | matrix metalloproteinase 9 (gelatinase B, 92kDa gelatinase, ') | ENST00000545925 | -0,592855063 |
| A_21_P0000780  | NR_038362       | ZNF345       | zinc finger protein 345                                        |                 | -0,592878353 |

|               |                 |             |                                                                         |                 |              |
|---------------|-----------------|-------------|-------------------------------------------------------------------------|-----------------|--------------|
| A_23_P120316  | NM_006636       | MTHFD2      | methylenetetrahydrofolate dehydrogenase (NADP+ dependant)               | ENST00000394053 | -0,592980518 |
| A_23_P138693  | NM_004808       | NMT2        | N-myristoyltransferase 2                                                | ENST00000535341 | -0,593014953 |
| A_21_P0008358 | ENST00000554225 | XLOC_010879 |                                                                         | ENST00000554225 | -0,593106433 |
| A_23_P329573  | NM_000211       | ITGB2       | integrin, beta 2 (complement component 3 receptor 3 and 3a)             | ENST00000302347 | -0,593120864 |
| A_23_P40174   | NM_004994       | MMP9        | matrix metalloproteinase 9 (gelatinase B, 92kDa gelatinase, matrilysin) | ENST00000545925 | -0,59320164  |
| A_33_P3342081 | NM_001198       | PRDM1       | PR domain containing 1, with ZNF domain                                 | ENST00000369096 | -0,593241778 |
| A_23_P1691    | NM_002421       | MMP1        | matrix metalloproteinase 1 (interstitial collagenase)                   | ENST00000315274 | -0,593242979 |
| A_33_P3352349 | NM_001190460    | KRTAP9-1    | keratin associated protein 9-1                                          | ENST00000377723 | -0,593329992 |
| A_23_P40174   | NM_004994       | MMP9        | matrix metalloproteinase 9 (gelatinase B, 92kDa gelatinase, matrilysin) | ENST00000545925 | -0,59355701  |
| A_23_P127557  | NM_198439       | KBTBD3      | kelch repeat and BTB (POZ) domain containing 3                          | ENST00000531837 | -0,593666947 |
| A_23_P120316  | NM_006636       | MTHFD2      | methylenetetrahydrofolate dehydrogenase (NADP+ dependant)               | ENST00000394053 | -0,593764033 |
| A_23_P4782    | NM_031896       | CACNG7      | calcium channel, voltage-dependent, gamma subunit 7                     | ENST00000222212 | -0,59384542  |
| A_23_P115872  | NM_018131       | CEP55       | centrosomal protein 55kDa                                               | ENST00000371485 | -0,593851321 |
| A_23_P87257   | NM_022061       | MRPL17      | mitochondrial ribosomal protein L17                                     | ENST00000529958 | -0,594012342 |
| A_23_P152678  | NM_015681       | B9D1        | B9 protein domain 1                                                     | ENST00000477683 | -0,594080283 |
| A_33_P3303212 | NM_207310       | CCDC74B     | coiled-coil domain containing 74B                                       | ENST00000468650 | -0,594182828 |
| A_23_P120467  | NM_199427       | ZFP64       | zinc finger protein 64 homolog (mouse)                                  | ENST00000361387 | -0,594239548 |
| A_23_P14193   | NM_002915       | RFC3        | replication factor C (activator 1) 3, 38kDa                             | ENST00000380071 | -0,594285035 |
| A_21_P0009907 | ENST00000417781 | XLOC_013781 |                                                                         | ENST00000417781 | -0,594347558 |
| A_23_P115645  | NM_001025076    | CELF2       | CUGBP, Elav-like family member 2                                        | ENST00000537122 | -0,59437958  |
| A_23_P1691    | NM_002421       | MMP1        | matrix metalloproteinase 1 (interstitial collagenase)                   | ENST00000315274 | -0,594471779 |
| A_23_P309739  | NM_000125       | ESR1        | estrogen receptor 1                                                     | ENST00000206249 | -0,594496563 |
| A_23_P112061  | NM_152419       | HGSNAT      | heparan-alpha-glucosaminide N-acetyltransferase                         | ENST00000458501 | -0,594545131 |
| A_23_P87238   | NM_006512       | SAA4        | serum amyloid A4, constitutive                                          | ENST00000524555 | -0,59493106  |
| A_24_P73577   | NM_170697       | ALDH1A2     | aldehyde dehydrogenase 1 family, member A2                              | ENST00000537372 | -0,594987738 |
| A_21_P0007073 | TCONS_00018797  | XLOC_008583 |                                                                         |                 | -0,595137909 |
| A_23_P25566   | NM_004951       | GPR183      | G protein-coupled receptor 183                                          | ENST00000376414 | -0,595617323 |
| A_33_P3221438 | NM_152531       | XXYL1       | xyloside xylosyltransferase 1                                           | ENST00000310380 | -0,595640902 |
| A_23_P207400  | NM_007300       | BRCA1       | breast cancer 1, early onset                                            | ENST00000412061 | -0,595687444 |



|                |                |              |                                                                              |                 |              |
|----------------|----------------|--------------|------------------------------------------------------------------------------|-----------------|--------------|
| A_21_P0013736  | DQ673922       | NAMA         | non-protein coding RNA, associated with MAP kinase pathway and growth arrest |                 | -0,595725877 |
| A_23_P137366   | NM_000491      | C1QB         | complement component 1, q subcomponent, B chain                              | ENST00000314933 | -0,59580163  |
| A_24_P162293   | NM_178040      | ERC1         | ELKS/RAB6-interacting/CAST family member 1                                   | ENST00000397203 | -0,59585416  |
| A_23_P121533   | NM_012445      | SPON2        | spondin 2, extracellular matrix protein                                      | ENST00000431380 | -0,595960812 |
| A_23_P391228   | NM_001031740   | MANEAL       | mannosidase, endo-alpha-like                                                 | ENST00000373045 | -0,596041657 |
| A_24_P85775    | NM_001039477   | C1orf38      | chromosome 1 open reading frame 38                                           | ENST00000373927 | -0,596158729 |
| A_21_P0007606  | TCONS_00020518 | XLOC_009836  |                                                                              |                 | -0,596170262 |
| A_23_P122508   | NM_080870      | DPCR1        | diffuse panbronchiolitis critical region 1                                   | ENST00000414703 | -0,596218073 |
| A_23_P66117    | NM_032039      | ITFG3        | integrin alpha FG-GAP repeat containing 3                                    | ENST00000301678 | -0,596276098 |
| A_21_P0009875  | NR_015406      | LOC149837    | uncharacterized LOC149837                                                    | ENST00000456714 | -0,59630917  |
| A_33_P3253249  | NM_002032      | FTH1         | ferritin, heavy polypeptide 1                                                | ENST00000534180 | -0,596531379 |
| A_32_P107493   | NM_153025      | C16orf55     | chromosome 16 open reading frame 55                                          | ENST00000301031 | -0,596536971 |
| A_33_P3214550  | NM_001557      | CXCR2        | chemokine (C-X-C motif) receptor 2                                           | ENST00000318507 | -0,596655693 |
| A_23_P215634   | NM_001013398   | IGFBP3       | insulin-like growth factor binding protein 3                                 | ENST00000438491 | -0,59679569  |
| A_24_P191312   | NM_003038      | SLC1A4       | solute carrier family 1 (glutamate/neutral amino acid transp                 | ENST00000480594 | -0,596874812 |
| A_21_P0005052  | TCONS_00012260 | XLOC_005811  |                                                                              |                 | -0,596895613 |
| A_23_P138507   | NM_001786      | CDK1         | cyclin-dependent kinase 1                                                    | ENST00000448257 | -0,596980392 |
| A_23_P121533   | NM_012445      | SPON2        | spondin 2, extracellular matrix protein                                      | ENST00000431380 | -0,596983066 |
| A_23_P27306    | NM_130386      | COLEC12      | collectin sub-family member 12                                               | ENST00000400256 | -0,596988191 |
| A_21_P0003917  | CR936814       | XLOC_004207  |                                                                              |                 | -0,5970361   |
| A_19_P00315718 | NM_001145191   | FAM200B      |                                                                              | ENST00000502502 | -0,597120594 |
| A_21_P0010978  | AF001893       | NEAT1        | nuclear paraspeckle assembly transcript 1 (non-protein coding)               |                 | -0,597240034 |
| A_23_P102471   | NM_000251      | MSH2         | mutS homolog 2, colon cancer, nonpolyposis type 1 (E. coli)                  | ENST00000543555 | -0,597278889 |
| A_23_P122508   | NM_080870      | DPCR1        | diffuse panbronchiolitis critical region 1                                   | ENST00000414703 | -0,597343312 |
| A_21_P0004641  | NM_001198815   | MUC22        | mucin 22                                                                     | ENST00000416716 | -0,597344453 |
| A_23_P329573   | NM_000211      | ITGB2        | integrin, beta 2 (complement component 3 receptor 3 and                      | ENST00000302347 | -0,597418919 |
| A_21_P0005983  | NR_027442      | LOC100288842 | UDP-GlcNAc:betaGal beta-1,3-N-acetylglucosaminyltransfer                     | ENST00000540063 | -0,597427083 |
| A_23_P40174    | NM_004994      | MMP9         | matrix metalloproteinase 9 (gelatinase B, 92kDa gelatinase,                  | ENST00000545925 | -0,597540839 |
| A_24_P226008   | NM_007283      | MGLL         | monoglyceride lipase                                                         | ENST00000536024 | -0,597591518 |

|               |                |              |                                                             |                 |              |
|---------------|----------------|--------------|-------------------------------------------------------------|-----------------|--------------|
| A_21_P0000772 | NR_038337      | LOC100505783 | uncharacterized LOC100505783                                |                 | -0,597595992 |
| A_32_P489     | NR_038399      | LOC100132735 | uncharacterized LOC100132735                                | ENST00000414038 | -0,597677075 |
| A_23_P121533  | NM_012445      | SPON2        | spondin 2, extracellular matrix protein                     | ENST00000431380 | -0,598000044 |
| A_23_P85783   | NM_006623      | PHGDH        | phosphoglycerate dehydrogenase                              | ENST00000369407 | -0,598076727 |
| A_33_P3405966 | NM_174964      | ST3GAL3      | ST3 beta-galactoside alpha-2,3-sialyltransferase 3          | ENST00000372362 | -0,598128405 |
| A_23_P9255    | NM_003177      | SYK          | spleen tyrosine kinase                                      | ENST00000375754 | -0,598128494 |
| A_33_P3302881 | NM_001003760   | KLHL31       | kelch-like 31 (Drosophila)                                  | ENST00000407079 | -0,598144738 |
| A_33_P3223648 | NR_037879      | LOC100505876 | uncharacterized LOC100505876                                | ENST00000406711 | -0,598145336 |
| A_21_P0006489 | TCONS_00017154 | XLOC_007956  |                                                             |                 | -0,59818434  |
| A_32_P19294   | NM_144669      | GLT1D1       | glycosyltransferase 1 domain containing 1                   | ENST00000441390 | -0,598218701 |
| A_23_P503010  | NM_153646      | SLC24A4      | solute carrier family 24 (sodium/potassium/calcium exchan   | ENST00000532405 | -0,598227459 |
| A_23_P6818    | NM_020163      | SEMA3G       | sema domain, immunoglobulin domain (Ig), short basic don    | ENST00000231721 | -0,598407324 |
| A_33_P3284888 | NM_198989      | DLEU7        | deleted in lymphocytic leukemia, 7                          | ENST00000335465 | -0,598513573 |
| A_33_P3267320 | NM_052859      | RFT1         | RFT1 homolog (S. cerevisiae)                                | ENST00000296292 | -0,598530666 |
| A_23_P112452  | NR_003191      | GGTA1P       | glycoprotein, alpha-galactosyltransferase 1 pseudogene      | ENST00000373793 | -0,598545233 |
| A_23_P152620  | NM_172088      | TNFSF13      | tumor necrosis factor (ligand) superfamily, member 13       | ENST00000380535 | -0,598592167 |
| A_21_P0013767 | BC048131       | LOC550643    | uncharacterized LOC550643                                   |                 | -0,598599564 |
| A_23_P103617  | NM_003568      | ANXA9        | annexin A9                                                  | ENST00000368947 | -0,598665878 |
| A_33_P3225273 | NM_001004128   | QSOX1        | quiescin Q6 sulfhydryl oxidase 1                            | ENST00000392029 | -0,598672953 |
| A_21_P0000680 | NR_037605      | LOC100506046 | uncharacterized LOC100506046                                | ENST00000416578 | -0,598701897 |
| A_24_P393372  | NM_001100913   | PACS2        | phosphofurin acidic cluster sorting protein 2               | ENST00000447393 | -0,598712665 |
| A_33_P3297050 | NM_033087      | ALG2         | asparagine-linked glycosylation 2, alpha-1,3-mannosyltransf | ENST00000238477 | -0,598789719 |
| A_23_P106661  | NM_052999      | CMTM1        | CKLF-like MARVEL transmembrane domain containing 1          | ENST00000379490 | -0,59892871  |
| A_21_P0002766 | XM_001714709   | LOC644662    | uncharacterized LOC644662                                   | ENST00000511512 | -0,598930748 |
| A_23_P138507  | NM_001786      | CDK1         | cyclin-dependent kinase 1                                   | ENST00000448257 | -0,599070381 |
| A_21_P0008755 | W87326         | XLOC_011520  |                                                             |                 | -0,599116399 |
| A_23_P255876  | NM_012144      | DNAI1        | dynein, axonemal, intermediate chain 1                      | ENST00000396929 | -0,599194157 |
| A_23_P26810   | NM_000546      | TP53         | tumor protein p53                                           | ENST00000396473 | -0,599254581 |
| A_23_P121533  | NM_012445      | SPON2        | spondin 2, extracellular matrix protein                     | ENST00000431380 | -0,599320903 |

|                |                  |                |                                                                              |                 |              |
|----------------|------------------|----------------|------------------------------------------------------------------------------|-----------------|--------------|
| A_23_P120316   | NM_006636        | MTHFD2         | methylenetetrahydrofolate dehydrogenase (NADP+ depend                        | ENST00000394053 | -0,599584224 |
| A_33_P3383233  | NM_201535        | NDRG2          | NDRG family member 2                                                         | ENST00000397847 | -0,599698236 |
| A_23_P131990   | NM_014588        | VSX1           | visual system homeobox 1                                                     | ENST00000557285 | -0,59995058  |
| A_23_P352266   | NM_000633        | BCL2           | B-cell CLL/lymphoma 2                                                        | ENST00000398117 | -0,599977703 |
| A_23_P112798   | NM_001312        | CRIP2          | cysteine-rich protein 2                                                      | ENST00000548309 | -0,600115633 |
| A_24_P277747   | NM_006586        | CNPY3          | canopy 3 homolog (zebrafish)                                                 | ENST00000372836 | -0,600166018 |
| A_23_P8981     | NM_000349        | STAR           | steroidogenic acute regulatory protein                                       | ENST00000520114 | -0,600378186 |
| A_23_P356004   | NM_013434        | KCNIP3         | Kv channel interacting protein 3, calsenilin                                 | ENST00000377181 | -0,600389202 |
| A_19_P00317034 | ENST00000515286  | Q46FH2         |                                                                              | ENST00000515286 | -0,600416377 |
| A_33_P3341586  | NM_001037633     | SIL1           | SIL1 homolog, endoplasmic reticulum chaperone (S. cerevis                    | ENST00000394817 | -0,600470197 |
| A_23_P1320     | NM_021245        | MYOZ1          | myozenin 1                                                                   | ENST00000359322 | -0,600484352 |
| A_23_P339119   | NM_024560        | ACSS3          | acyl-CoA synthetase short-chain family member 3                              | ENST00000548324 | -0,600525916 |
| A_23_P122863   | NM_001001555     | GRB10          | growth factor receptor-bound protein 10                                      | ENST00000402497 | -0,600689209 |
| A_23_P109593   | NM_014346        | TBC1D22A       | TBC1 domain family, member 22A                                               | ENST00000355704 | -0,600747295 |
| A_21_P0014096  | XR_108421        | LOC100507265   | uncharacterized LOC100507265                                                 |                 | -0,600862452 |
| A_21_P0010854  | NR_027916        | AKR1CL1        | aldo-keto reductase family 1, member C-like 1                                | ENST00000432689 | -0,600941209 |
| A_23_P217845   | NM_002928        | RGS16          | regulator of G-protein signaling 16                                          | ENST00000367558 | -0,601012034 |
| A_24_P149124   | NM_004772        | C5orf13        | chromosome 5 open reading frame 13                                           | ENST00000446294 | -0,601098015 |
| A_23_P121480   | NM_001004196     | CD200          | CD200 molecule                                                               | ENST00000478595 | -0,601136923 |
| A_24_P286569   | NM_018697        | LANCL2         | LanC lantibiotic synthetase component C-like 2 (bacterial)                   | ENST00000254770 | -0,601136941 |
| A_23_P1691     | NM_002421        | MMP1           | matrix metalloproteinase 1 (interstitial collagenase)                        | ENST00000315274 | -0,601247528 |
| A_23_P217269   | NM_007268        | VSIG4          | V-set and immunoglobulin domain containing 4                                 | ENST00000412866 | -0,601311917 |
| A_23_P131050   | NM_030924        | ACSBG2         | acyl-CoA synthetase bubblegum family member 2                                | ENST00000252669 | -0,60147596  |
| A_21_P0013498  | TCONS_I2_0002789 | XLOC_I2_014289 |                                                                              |                 | -0,601586481 |
| A_23_P115872   | NM_018131        | CEP55          | centrosomal protein 55kDa                                                    | ENST00000371485 | -0,601848089 |
| A_24_P260101   | NM_007289        | MME            | membrane metallo-endopeptidase                                               | ENST00000460393 | -0,601883781 |
| A_23_P207387   | NM_032484        | GHDC           | GH3 domain containing                                                        | ENST00000301671 | -0,602087031 |
| A_23_P40174    | NM_004994        | MMP9           | matrix metalloproteinase 9 (gelatinase B, 92kDa gelatinase, 'ENST00000545925 | ENST00000545925 | -0,602227366 |
| A_33_P3346338  | NM_001145088     | WDR67          | WD repeat domain 67                                                          | ENST00000378080 | -0,602625511 |

|                |                 |                |                                                                    |                 |              |
|----------------|-----------------|----------------|--------------------------------------------------------------------|-----------------|--------------|
| A_23_P161424   | NM_032812       | PLXDC2         | plexin domain containing 2                                         | ENST00000536022 | -0,602645359 |
| A_23_P103099   | NM_001031695    | RBFOX2         | RNA binding protein, fox-1 homolog (C. elegans) 2                  | ENST00000438146 | -0,60266081  |
| A_21_P0009053  | TCONS_00024718  | XLOC_011999    |                                                                    |                 | -0,602687734 |
| A_33_P3569068  | NM_003550       | MAD1L1         | MAD1 mitotic arrest deficient-like 1 (yeast)                       | ENST00000265854 | -0,602719366 |
| A_23_P164196   | NM_138281       | DLX4           | distal-less homeobox 4                                             | ENST00000411890 | -0,602783835 |
| A_23_P121564   | NM_000857       | GUCY1B3        | guanylate cyclase 1, soluble, beta 3                               | ENST00000264424 | -0,6027842   |
| A_23_P115645   | NM_001025076    | CELF2          | CUGBP, Elav-like family member 2                                   | ENST00000537122 | -0,602818256 |
| A_33_P3409944  | NM_005272       | GNAT2          | guanine nucleotide binding protein (G protein), alpha trans        | ENST00000351050 | -0,602838443 |
| A_33_P3393121  | NR_001573       | RBM3AP         | RNA binding motif protein, Y-linked, family 3, member A pseudogene |                 | -0,602867694 |
| A_24_P407930   | NM_031216       | SEH1L          | SEH1-like (S. cerevisiae)                                          | ENST00000262124 | -0,602949203 |
| A_23_P120316   | NM_006636       | MTHFD2         | methylenetetrahydrofolate dehydrogenase (NADP+ depend              | ENST00000394053 | -0,602966068 |
| A_33_P3302518  | NM_001243342    | CCDC40         | coiled-coil domain containing 40                                   | ENST00000269318 | -0,603192597 |
| A_32_P52911    | NM_018269       | ADI1           | acireductone dioxygenase 1                                         | ENST00000327435 | -0,603344731 |
| A_32_P96435    | NM_001037232    | ZNF829         | zinc finger protein 829                                            | ENST00000391711 | -0,603435474 |
| A_24_P416131   | NM_021149       | COTL1          | coactosin-like 1 (Dictyostelium)                                   | ENST00000262428 | -0,603575389 |
| A_23_P336554   | NM_134470       | IL1RAP         | interleukin 1 receptor accessory protein                           | ENST00000422485 | -0,603807326 |
| A_23_P147245   | NM_017784       | OSBPL10        | oxysterol binding protein-like 10                                  | ENST00000396556 | -0,603881409 |
| A_19_P00811440 | TCONS_00004564  | XLOC_002473    |                                                                    |                 | -0,603901999 |
| A_33_P3405424  | NM_172374       | IL4I1          | interleukin 4 induced 1                                            | ENST00000341114 | -0,60391205  |
| A_24_P83738    | NM_198188       | ASTN2          | astrotactin 2                                                      | ENST00000361477 | -0,604046027 |
| A_23_P110941   | NM_001512       | GSTA4          | glutathione S-transferase alpha 4                                  | ENST00000370960 | -0,604064996 |
| A_24_P370472   | NM_021983       | HLA-DRB4       | major histocompatibility complex, class II, DR beta 4              | ENST00000411959 | -0,604228524 |
| A_23_P156880   | NM_006208       | ENPP1          | ectonucleotide pyrophosphatase/phosphodiesterase 1                 | ENST00000513998 | -0,60434878  |
| A_23_P122863   | NM_001001555    | GRB10          | growth factor receptor-bound protein 10                            | ENST00000402497 | -0,604446102 |
| A_33_P3369964  | NR_024612       | ATXN1L         | ataxin 1-like                                                      |                 | -0,60445732  |
| A_33_P3255664  | ENST00000474046 | PBX1           | pre-B-cell leukemia homeobox 1                                     | ENST00000474046 | -0,604467637 |
| A_21_P0011051  | ENST00000551082 | XLOC_I2_003053 |                                                                    | ENST00000551082 | -0,604503848 |
| A_23_P207742   | NM_003250       | THRA           | thyroid hormone receptor, alpha                                    | ENST00000394121 | -0,604525561 |
| A_23_P112061   | NM_152419       | HGSNAT         | heparan-alpha-glucosaminide N-acetyltransferase                    | ENST00000458501 | -0,604727016 |

|                |                 |                |                                                        |                 |              |
|----------------|-----------------|----------------|--------------------------------------------------------|-----------------|--------------|
| A_33_P3341105  | NM_002602       | PDE6G          | phosphodiesterase 6G, cGMP-specific, rod, gamma        | ENST00000331056 | -0,604928379 |
| A_24_P187970   | NM_007365       | PADI2          | peptidyl arginine deiminase, type II                   | ENST00000375481 | -0,60494929  |
| A_19_P00317683 | BC038559        | LOC100506190   | uncharacterized LOC100506190                           |                 | -0,605118645 |
| A_23_P122724   | NM_004665       | VNN2           | vanin 2                                                | ENST00000392389 | -0,605183488 |
| A_21_P0009401  | TCONS_00026020  | XLOC_012360    |                                                        |                 | -0,605351073 |
| A_21_P0000088  | NM_001172658    | ZFYVE28        | zinc finger, FYVE domain containing 28                 | ENST00000509171 | -0,605358662 |
| A_24_P99090    | NM_018204       | CKAP2          | cytoskeleton associated protein 2                      | ENST00000398044 | -0,60538266  |
| A_33_P3315425  | NM_022840       | METTL4         | methyltransferase like 4                               | ENST00000319888 | -0,605500973 |
| A_23_P362191   | NR_026951       | LINC00324      | long intergenic non-protein coding RNA 324             | ENST00000315707 | -0,605531133 |
| A_23_P100386   | NM_152456       | IL34           | interleukin 34                                         | ENST00000429149 | -0,605748898 |
| A_19_P00328996 | AK057050        | XLOC_I2_015037 |                                                        |                 | -0,605812022 |
| A_23_P126735   | NM_000572       | IL10           | interleukin 10                                         | ENST00000423557 | -0,605889554 |
| A_23_P112061   | NM_152419       | HGSNAT         | heparan-alpha-glucosaminide N-acetyltransferase        | ENST00000458501 | -0,606063274 |
| A_33_P3420078  | ENST00000367368 | LRP11          | low density lipoprotein receptor-related protein 11    | ENST00000367368 | -0,606233432 |
| A_23_P117274   | NM_005932       | MIPEP          | mitochondrial intermediate peptidase                   | ENST00000382172 | -0,606298106 |
| A_23_P120883   | NM_002133       | HMOX1          | heme oxygenase (decycling) 1                           | ENST00000216117 | -0,606364842 |
| A_32_P175934   | NM_001778       | CD48           | CD48 molecule                                          | ENST00000368046 | -0,606407133 |
| A_21_P0010882  | ENST00000443523 | XLOC_I2_001986 |                                                        | ENST00000443523 | -0,606499037 |
| A_21_P0003999  | THC2620722      | XLOC_004382    |                                                        |                 | -0,606598961 |
| A_19_P00319800 | NR_040074       | LOC100287225   | uncharacterized LOC100287225                           | ENST00000435144 | -0,606601116 |
| A_23_P387184   | NM_020464       | NHSL1          | NHS-like 1                                             | ENST00000343505 | -0,606721008 |
| A_33_P3361422  | NM_000784       | CYP27A1        | cytochrome P450, family 27, subfamily A, polypeptide 1 | ENST00000494263 | -0,606776612 |
| A_24_P183664   | NM_014817       | TRIL           | TLR4 interactor with leucine-rich repeats              | ENST00000322982 | -0,606835121 |
| A_23_P121533   | NM_012445       | SPON2          | spondin 2, extracellular matrix protein                | ENST00000431380 | -0,606855015 |
| A_23_P1691     | NM_002421       | MMP1           | matrix metalloproteinase 1 (interstitial collagenase)  | ENST00000315274 | -0,606863759 |
| A_23_P149545   | NM_003528       | HIST2H2BE      | histone cluster 2, H2be                                | ENST00000369155 | -0,606988554 |
| A_33_P3266285  | NM_001034842    | PTCHD3         | patched domain containing 3                            | ENST00000438700 | -0,607110507 |
| A_23_P110941   | NM_001512       | GSTA4          | glutathione S-transferase alpha 4                      | ENST00000370960 | -0,60711703  |
| A_23_P121533   | NM_012445       | SPON2          | spondin 2, extracellular matrix protein                | ENST00000431380 | -0,607272235 |



|                |                 |                |                                                         |                 |              |
|----------------|-----------------|----------------|---------------------------------------------------------|-----------------|--------------|
| A_33_P3279470  | NM_001138       | AGRP           | agouti related protein homolog (mouse)                  | ENST00000290953 | -0,607512147 |
| A_33_P3384108  | NM_194255       | SLC19A1        | solute carrier family 19 (folate transporter), member 1 | ENST00000311124 | -0,607588423 |
| A_21_P0010473  | BC040576        | XLOC_014323    |                                                         | ENST00000422876 | -0,607762964 |
| A_23_P309739   | NM_000125       | ESR1           | estrogen receptor 1                                     | ENST00000206249 | -0,607783919 |
| A_21_P0006079  | ENST00000432148 | XLOC_007722    |                                                         | ENST00000432148 | -0,60808673  |
| A_23_P414519   | NM_016588       | NRN1           | neuritin 1                                              | ENST00000495850 | -0,608155275 |
| A_23_P103486   | NM_000775       | CYP2J2         | cytochrome P450, family 2, subfamily J, polypeptide 2   | ENST00000469406 | -0,608395883 |
| A_19_P00807628 | NR_033896       | FLJ46906       | uncharacterized LOC441172                               | ENST00000432673 | -0,608411851 |
| A_21_P0007473  | TCONS_00020154  | XLOC_009604    |                                                         |                 | -0,608508153 |
| A_23_P3532     | NM_004862       | LITAF          | lipopolysaccharide-induced TNF factor                   | ENST00000381810 | -0,608515701 |
| A_33_P3339212  | NM_004237       | TRIP13         | thyroid hormone receptor interactor 13                  | ENST00000166345 | -0,608543066 |
| A_24_P42693    | NM_021187       | CYP4F11        | cytochrome P450, family 4, subfamily F, polypeptide 11  | ENST00000326742 | -0,608544496 |
| A_33_P3406072  | NM_001244959    | FRMD3          | FERM domain containing 3                                | ENST00000304195 | -0,608576572 |
| A_21_P0005729  | ENST00000519412 | XLOC_006858    |                                                         | ENST00000519412 | -0,60860627  |
| A_23_P19852    | NM_152558       | IQCE           | IQ motif containing E                                   | ENST00000404984 | -0,608674425 |
| A_21_P0007657  | TCONS_00021246  | XLOC_009937    |                                                         |                 | -0,608750074 |
| A_23_P60248    | NM_003329       | TXN            | thioredoxin                                             | ENST00000487892 | -0,608905474 |
| A_33_P3253440  | NM_152391       | PQLC3          | PQ loop repeat containing 3                             | ENST00000487471 | -0,608935365 |
| A_33_P3403576  | NM_001136219    | FCGR2A         | Fc fragment of IgG, low affinity IIa, receptor (CD32)   | ENST00000271450 | -0,608962147 |
| A_21_P0000571  | NR_028484       | C22orf45       | chromosome 22 open reading frame 45                     | ENST00000543438 | -0,608987828 |
| A_33_P3239332  | BC040725        | LOC284260      | uncharacterized LOC284260                               |                 | -0,60902491  |
| A_23_P104741   | NM_032531       | KIRREL3        | kin of IRRE like 3 (Drosophila)                         | ENST00000525144 | -0,609035338 |
| A_23_P45099    | NM_002125       | HLA-DRB5       | major histocompatibility complex, class II, DR beta 5   | ENST00000374975 | -0,609037523 |
| A_24_P377144   | NM_058172       | ANTXR2         | anthrax toxin receptor 2                                | ENST00000307333 | -0,609081448 |
| A_23_P151820   | NM_024832       | RIN3           | Ras and Rab interactor 3                                | ENST00000428147 | -0,609194955 |
| A_21_P0013873  | ENST00000427671 | XLOC_I2_015842 |                                                         | ENST00000427671 | -0,609271101 |
| A_23_P12733    | NM_018649       | H2AFY2         | H2A histone family, member Y2                           | ENST00000373255 | -0,609299753 |
| A_23_P370682   | NM_138456       | BATF2          | basic leucine zipper transcription factor, ATF-like 2   | ENST00000527454 | -0,609330198 |
| A_23_P40821    | NM_032383       | HPS3           | Hermansky-Pudlak syndrome 3                             | ENST00000460822 | -0,609590165 |

|                |                  |                |                                                             |                 |              |
|----------------|------------------|----------------|-------------------------------------------------------------|-----------------|--------------|
| A_33_P3399718  | XM_001716411     | LOC128322      | nuclear transport factor 2-like                             |                 | -0,609677566 |
| A_33_P3252695  | NM_018659        | CYTL1          | cytokine-like 1                                             | ENST00000307746 | -0,609703832 |
| A_23_P66432    | NM_032646        | TTYH2          | tweety homolog 2 (Drosophila)                               | ENST00000441391 | -0,609719779 |
| A_23_P401709   | NM_152504        | C20orf196      | chromosome 20 open reading frame 196                        | ENST00000445603 | -0,609881209 |
| A_24_P349965   | NM_007109        | TCF19          | transcription factor 19                                     | ENST00000400401 | -0,609884646 |
| A_24_P408457   | NM_000262        | NAGA           | N-acetylgalactosaminidase, alpha-                           | ENST00000396398 | -0,60990253  |
| A_33_P3290780  | NM_001185156     | IL24           | interleukin 24                                              | ENST00000491169 | -0,609958104 |
| A_24_P304051   | NM_004832        | GSTO1          | glutathione S-transferase omega 1                           | ENST00000493946 | -0,610041684 |
| A_33_P3620087  | BC030752         | LOC400756      | uncharacterized LOC400756                                   | ENST00000453229 | -0,610189055 |
| A_23_P101871   | NM_024907        | FBXO17         | F-box protein 17                                            | ENST00000292852 | -0,610228592 |
| A_24_P330112   | NM_018048        | MAGOHB         | mago-nashi homolog B (Drosophila)                           |                 | -0,610290584 |
| A_24_P237936   | NM_175769        | TCF23          | transcription factor 23                                     | ENST00000296096 | -0,610404497 |
| A_33_P3347168  | NM_005647        | TBL1X          | transducin (beta)-like 1X-linked                            | ENST00000407597 | -0,610414541 |
| A_23_P80032    | NM_005225        | E2F1           | E2F transcription factor 1                                  | ENST00000343380 | -0,61049524  |
| A_23_P55356    | NM_182566        | VMO1           | vitelline membrane outer layer 1 homolog (chicken)          | ENST00000441199 | -0,610513224 |
| A_23_P112004   | NM_012472        | LRR6           | leucine rich repeat containing 6                            | ENST00000395414 | -0,610703329 |
| A_33_P3264394  | AK127311         | ASPSR1         | alveolar soft part sarcoma chromosome region, candidate 1   |                 | -0,610703447 |
| A_23_P131899   | NM_080489        | SDCBP2         | syndecan binding protein (syntenin) 2                       | ENST00000360779 | -0,610721827 |
| A_23_P126752   | NM_004930        | CAPZB          | capping protein (actin filament) muscle Z-line, beta        | ENST00000375145 | -0,611141689 |
| A_23_P138725   | NM_031484        | MARVELD1       | MARVEL domain containing 1                                  | ENST00000285605 | -0,611151256 |
| A_23_P200096   | NM_025106        | SPSB1          | splA/ryanodine receptor domain and SOCS box containing 1    | ENST00000377399 | -0,611156334 |
| A_23_P122863   | NM_001001555     | GRB10          | growth factor receptor-bound protein 10                     | ENST00000402497 | -0,611193869 |
| A_21_P0009158  | ENST00000458492  | XLOC_012115    |                                                             | ENST00000458492 | -0,611207026 |
| A_23_P70688    | NM_004271        | LY86           | lymphocyte antigen 86                                       | ENST00000230568 | -0,611220206 |
| A_19_P00322904 | NM_173463        | CCDC149        | coiled-coil domain containing 149                           | ENST00000505471 | -0,611237707 |
| A_21_P0011831  | TCONS_I2_0001385 | XLOC_I2_007456 |                                                             |                 | -0,611239403 |
| A_21_P0001427  | THC2787393       | XLOC_000584    |                                                             |                 | -0,611308498 |
| A_23_P146946   | NM_001323        | CST6           | cystatin E/M                                                | ENST00000312134 | -0,611372502 |
| A_23_P502336   | NM_013447        | EMR2           | egf-like module containing, mucin-like, hormone receptor-li | ENST00000315576 | -0,611393273 |

|                |                  |                |                                                                                    |                 |              |
|----------------|------------------|----------------|------------------------------------------------------------------------------------|-----------------|--------------|
| A_23_P70249    | NM_001790        | CDC25C         | cell division cycle 25 homolog C ( <i>S. pombe</i> )                               | ENST00000356505 | -0,611483543 |
| A_23_P207400   | NM_007300        | BRCA1          | breast cancer 1, early onset                                                       | ENST00000412061 | -0,611648776 |
| A_23_P62335    | NM_018196        | TMLHE          | trimethyllysine hydroxylase, epsilon                                               | ENST00000369439 | -0,611653933 |
| A_23_P120002   | NM_004510        | SP110          | SP110 nuclear body protein                                                         | ENST00000338556 | -0,611684633 |
| A_23_P118025   | NM_022355        | DPEP2          | dipeptidase 2                                                                      | ENST00000412757 | -0,611713777 |
| A_32_P49668    | XM_003403393     | LOC100653060   | putative POM121-like protein 1-like                                                |                 | -0,611885657 |
| A_33_P3417626  | NM_198573        | ENHO           | energy homeostasis associated                                                      | ENST00000303992 | -0,612006328 |
| A_23_P126735   | NM_000572        | IL10           | interleukin 10                                                                     | ENST00000423557 | -0,612082548 |
| A_21_P0010092  | TCONS_00028559   | XLOC_013547    |                                                                                    |                 | -0,612113596 |
| A_24_P386622   | NM_004041        | ARRB1          | arrestin, beta 1                                                                   | ENST00000360025 | -0,612185762 |
| A_19_P00322939 | NR_003367        | PVT1           |                                                                                    |                 | -0,612323079 |
| A_23_P12746    | NM_002438        | MRC1           | mannose receptor, C type 1                                                         | ENST00000239761 | -0,612406154 |
| A_23_P215060   | NM_001018111     | PODXL          | podocalyxin-like                                                                   | ENST00000541194 | -0,612438851 |
| A_23_P126735   | NM_000572        | IL10           | interleukin 10                                                                     | ENST00000423557 | -0,612667602 |
| A_23_P146908   | NM_004853        | STX8           | syntaxin 8                                                                         | ENST00000306357 | -0,612836189 |
| A_21_P0007799  | TCONS_00020993   | XLOC_010257    |                                                                                    |                 | -0,612873106 |
| A_32_P41026    | NM_001024956     | SC5DL          | sterol-C5-desaturase (ERG3 delta-5-desaturase homolog, <i>S. cerevisiae</i> )-like |                 | -0,612900168 |
| A_23_P1691     | NM_002421        | MMP1           | matrix metalloproteinase 1 (interstitial collagenase)                              | ENST00000315274 | -0,612916756 |
| A_23_P100539   | NM_001171        | ABCC6          | ATP-binding cassette, sub-family C (CFTR/MRP), member 6                            | ENST00000205558 | -0,613055173 |
| A_21_P0003301  | TCONS_00007281   | XLOC_003284    |                                                                                    |                 | -0,613130364 |
| A_33_P3245631  | NM_001080494     | TTC39A         | tetratricopeptide repeat domain 39A                                                | ENST00000524442 | -0,613190116 |
| A_23_P300076   | NM_032263        | IQCG           | IQ motif containing G                                                              | ENST00000490748 | -0,613254468 |
| A_21_P0012475  | TCONS_I2_0001966 | XLOC_I2_010489 |                                                                                    |                 | -0,613277884 |
| A_23_P48669    | NM_005192        | CDKN3          | cyclin-dependent kinase inhibitor 3                                                | ENST00000555837 | -0,613454942 |
| A_23_P212105   | NM_001351        | DAZL           | deleted in azoospermia-like                                                        | ENST00000399444 | -0,61363357  |
| A_33_P3356863  | AK128846         | LOC100128172   | uncharacterized LOC100128172                                                       |                 | -0,613648088 |
| A_23_P121533   | NM_012445        | SPON2          | spondin 2, extracellular matrix protein                                            | ENST00000431380 | -0,613654533 |
| A_24_P330796   | NM_017777        | MKS1           | Meckel syndrome, type 1                                                            | ENST00000337050 | -0,613744033 |
| A_23_P104224   | NM_138933        | A1CF           | APOBEC1 complementation factor                                                     | ENST00000395489 | -0,613801216 |

|                |                 |             |                                                                              |                 |              |
|----------------|-----------------|-------------|------------------------------------------------------------------------------|-----------------|--------------|
| A_33_P3410654  | NM_205852       | CLEC12B     | C-type lectin domain family 12, member B                                     | ENST00000396502 | -0,613976305 |
| A_21_P0009779  | THC2570509      | XLOC_013429 |                                                                              |                 | -0,613993789 |
| A_23_P433369   | NM_015473       | HEATR5A     | HEAT repeat containing 5A                                                    | ENST00000389961 | -0,614090691 |
| A_23_P113393   | NM_017413       | APLN        | apelin                                                                       | ENST00000307484 | -0,614214666 |
| A_23_P122052   | NM_001008397    | GPX8        | glutathione peroxidase 8 (putative)                                          | ENST00000503787 | -0,614249803 |
| A_23_P103511   | NM_001085375    | C1orf226    | chromosome 1 open reading frame 226                                          | ENST00000458626 | -0,614251048 |
| A_23_P423237   | NM_000231       | SGCG        | sarcoglycan, gamma (35kDa dystrophin-associated glycoprotein)                | ENST00000537476 | -0,614303143 |
| A_23_P361049   | NM_012223       | MYO1B       | myosin IB                                                                    | ENST00000439065 | -0,614392935 |
| A_23_P117662   | NM_002112       | HDC         | histidine decarboxylase                                                      | ENST00000267845 | -0,614509863 |
| A_33_P3416568  | ENST00000367596 | AIG1        | androgen-induced 1                                                           | ENST00000367596 | -0,614663244 |
| A_23_P116557   | NM_009587       | LGALS9      | lectin, galactoside-binding, soluble, 9                                      | ENST00000467111 | -0,614671    |
| A_19_P00322929 | ENST00000513179 | XLOC_003870 | 0                                                                            | ENST00000513179 | -0,614711814 |
| A_23_P131089   | NM_198471       | KANK3       | KN motif and ankyrin repeat domains 3                                        | ENST00000330915 | -0,614729849 |
| A_23_P103310   | NM_002963       | S100A7      | S100 calcium binding protein A7                                              | ENST00000368723 | -0,614796747 |
| A_23_P117298   | NM_000131       | F7          | coagulation factor VII (serum prothrombin conversion accelerating component) | ENST00000346342 | -0,614814352 |
| A_24_P940434   | AK094364        | LOC439914   | uncharacterized LOC439914                                                    | ENST00000316124 | -0,614968931 |
| A_23_P23584    | NM_020248       | CTNNBIP1    | catenin, beta interacting protein 1                                          | ENST00000377263 | -0,615173836 |
| A_21_P0004268  | TCONS_00010003  | XLOC_004439 |                                                                              |                 | -0,615228147 |
| A_24_P145629   | NM_178865       | SERINC2     | serine incorporator 2                                                        | ENST00000536859 | -0,615234025 |
| A_24_P176493   | NM_015251       | ATMIN       | ATM interactor                                                               | ENST00000299575 | -0,615367676 |
| A_33_P3844650  | NM_012098       | ANGPTL2     | angiopoietin-like 2                                                          | ENST00000373417 | -0,615597015 |
| A_23_P421306   | NM_177963       | SYT12       | synaptotagmin XII                                                            | ENST00000393946 | -0,615872901 |
| A_23_P10305    | NM_175859       | CTPS2       | CTP synthase II                                                              | ENST00000380207 | -0,615882546 |
| A_33_P3294459  | NR_024086       | COPG2IT1    | COPG2 imprinted transcript 1 (non-protein coding)                            |                 | -0,615949046 |
| A_23_P102117   | NM_025216       | WNT10A      | wingless-type MMTV integration site family, member 10A                       | ENST00000258411 | -0,616002663 |
| A_23_P35609    | NM_000375       | UROS        | uroporphyrinogen III synthase                                                | ENST00000420761 | -0,616029212 |
| A_33_P3782529  | NR_037898       | LOC553103   | uncharacterized LOC553103                                                    | ENST00000417795 | -0,616033125 |
| A_33_P3273173  | NM_004651       | USP11       | ubiquitin specific peptidase 11                                              | ENST00000489030 | -0,616348315 |
| A_23_P9614     | NM_020142       | NDUFA4L2    | NADH dehydrogenase (ubiquinone) 1 alpha subcomplex, 4-like 2                 | ENST00000555173 | -0,616371583 |

|               |                 |              |                                                          |                 |              |
|---------------|-----------------|--------------|----------------------------------------------------------|-----------------|--------------|
| A_33_P3231447 | NM_000210       | ITGA6        | integrin, alpha 6                                        | ENST00000409532 | -0,616543911 |
| A_23_P361405  | NM_003549       | HYAL3        | hyaluronoglucosaminidase 3                               | ENST00000336307 | -0,616624016 |
| A_23_P145718  | NM_001637       | AOAH         | acyloxyacyl hydrolase (neutrophil)                       | ENST00000483864 | -0,616638111 |
| A_23_P154208  | NM_017567       | NAGK         | N-acetylglucosamine kinase                               | ENST00000455197 | -0,616997835 |
| A_23_P342108  | NM_152612       | CCDC116      | coiled-coil domain containing 116                        | ENST00000292779 | -0,617038155 |
| A_23_P31143   | NM_001003395    | TPD52L1      | tumor protein D52-like 1                                 | ENST00000392482 | -0,617157255 |
| A_23_P211401  | NM_001039570    | KREMEN1      | kringle containing transmembrane protein 1               | ENST00000407188 | -0,617267764 |
| A_23_P102864  | NM_002772       | TMPRSS15     | transmembrane protease, serine 15                        | ENST00000284885 | -0,617287492 |
| A_23_P147431  | NM_002350       | LYN          | v-yes-1 Yamaguchi sarcoma viral related oncogene homolog | ENST00000519728 | -0,617520663 |
| A_23_P106389  | NM_003612       | SEMA7A       | semaphorin 7A, GPI membrane anchor (John Milton Hagen)   | ENST00000543145 | -0,617677018 |
| A_21_P0009342 | NR_030732       | LOC645638    | WDMN1-like pseudogene                                    |                 | -0,617979439 |
| A_23_P66948   | NM_022751       | FAM59A       | family with sequence similarity 59, member A             | ENST00000269209 | -0,61817681  |
| A_24_P234856  | NM_001745       | CAMLG        | calcium modulating ligand                                | ENST00000297156 | -0,618256437 |
| A_24_P323114  | NR_001446       | ANXA2P3      | annexin A2 pseudogene 3                                  |                 | -0,618351422 |
| A_33_P3316786 | NM_080759       | DACH1        | dachshund homolog 1 (Drosophila)                         | ENST00000359684 | -0,61877965  |
| A_33_P3369760 | NM_022343       | GLIPR2       | GLI pathogenesis-related 2                               | ENST00000377959 | -0,618944142 |
| A_23_P87545   | NM_021034       | IFITM3       | interferon induced transmembrane protein 3               | ENST00000531688 | -0,61916418  |
| A_21_P0000166 | NM_001205281    | LOC100506012 | serine/threonine-protein phosphatase 5-like              |                 | -0,619407173 |
| A_23_P1691    | NM_002421       | MMP1         | matrix metalloproteinase 1 (interstitial collagenase)    | ENST00000315274 | -0,619417711 |
| A_32_P538180  | NM_178422       | PAQR7        | progesterone and adiponectin receptor family member VII  | ENST00000374296 | -0,619447969 |
| A_33_P3247205 | NM_022746       | Mar-01       | mitochondrial amidoxime reducing component 1             | ENST00000366910 | -0,619843019 |
| A_23_P352266  | NM_000633       | BCL2         | B-cell CLL/lymphoma 2                                    | ENST00000398117 | -0,620141312 |
| A_23_P380998  | NM_015361       | R3HDM1       | R3H domain containing 1                                  | ENST00000329971 | -0,620409167 |
| A_23_P147431  | NM_002350       | LYN          | v-yes-1 Yamaguchi sarcoma viral related oncogene homolog | ENST00000519728 | -0,620577438 |
| A_33_P3332393 | ENST00000372244 | TMEM53       | transmembrane protein 53                                 | ENST00000372244 | -0,620704713 |
| A_23_P40821   | NM_032383       | HPS3         | Hermansky-Pudlak syndrome 3                              | ENST00000460822 | -0,620868756 |
| A_33_P3261463 | AL713743        | FLJ42875     | uncharacterized LOC440556                                |                 | -0,620895799 |
| A_33_P3376404 | NM_017883       | WDR13        | WD repeat domain 13                                      | ENST00000486125 | -0,621305715 |
| A_23_P138507  | NM_001786       | CDK1         | cyclin-dependent kinase 1                                | ENST00000448257 | -0,621402713 |



|               |                  |                |                                                               |                 |              |
|---------------|------------------|----------------|---------------------------------------------------------------|-----------------|--------------|
| A_21_P0010728 | NM_001244910     | FCGR1B         | Fc fragment of IgG, high affinity Ib, receptor (CD64)         | ENST00000369178 | -0,621427619 |
| A_21_P0012422 | TCONS_I2_0001907 | XLOC_I2_010056 |                                                               |                 | -0,621453727 |
| A_23_P205074  | NM_181785        | SLC46A3        | solute carrier family 46, member 3                            | ENST00000266943 | -0,621890445 |
| A_33_P3392580 | NM_013411        | AK2            | adenylate kinase 2                                            | ENST00000373449 | -0,622087014 |
| A_23_P78871   | NM_024076        | KCTD15         | potassium channel tetramerisation domain containing 15        | ENST00000413790 | -0,622189188 |
| A_21_P0010377 | ENST00000420180  | XLOC_014338    |                                                               | ENST00000420180 | -0,622238533 |
| A_23_P398172  | NM_020819        | FAM135A        | family with sequence similarity 135, member A                 | ENST00000361499 | -0,622329517 |
| A_23_P259797  | NM_174917        | ACSF3          | acyl-CoA synthetase family member 3                           | ENST00000542688 | -0,622850968 |
| A_33_P3256303 | NM_001206609     | SELPLG         | selectin P ligand                                             | ENST00000388962 | -0,622871002 |
| A_33_P3242623 | NM_014331        | SLC7A11        | solute carrier family 7 (anionic amino acid transporter light | ENST00000280612 | -0,623035486 |
| A_33_P3410351 | NM_000848        | GSTM2          | glutathione S-transferase mu 2 (muscle)                       | ENST00000476040 | -0,623059458 |
| A_23_P148194  | NM_018269        | ADI1           | acireductone dioxygenase 1                                    | ENST00000327435 | -0,623078436 |
| A_21_P0010670 | ENST00000446962  | XLOC_I2_001302 |                                                               | ENST00000446962 | -0,623124906 |
| A_23_P395172  | NM_007011        | ABHD2          | abhydrolase domain containing 2                               | ENST00000352732 | -0,623231431 |
| A_23_P70785   | NM_001624        | AIM1           | absent in melanoma 1                                          | ENST00000369066 | -0,623840164 |
| A_33_P3310104 | NM_002639        | SERPINB5       | serpin peptidase inhibitor, clade B (ovalbumin), member 5     | ENST00000382771 | -0,623879931 |
| A_23_P502654  | NM_004169        | SHMT1          | serine hydroxymethyltransferase 1 (soluble)                   | ENST00000352886 | -0,624101253 |
| A_24_P66027   | NM_004900        | APOBEC3B       | apolipoprotein B mRNA editing enzyme, catalytic polypeptid    | ENST00000335760 | -0,624148315 |
| A_33_P3365034 | ENST00000339805  | GPR17          | G protein-coupled receptor 17                                 | ENST00000339805 | -0,624178546 |
| A_24_P132383  | NM_175571        | GIMAP8         | GTPase, IMAP family member 8                                  | ENST00000307271 | -0,624758281 |
| A_33_P3336760 | NM_018849        | ABCB4          | ATP-binding cassette, sub-family B (MDR/TAP), member 4        | ENST00000265723 | -0,624776099 |
| A_23_P29769   | NM_015472        | WWTR1          | WW domain containing transcription regulator 1                | ENST00000494754 | -0,62484342  |
| A_23_P20606   | NM_015469        | NIPSNAP3A      | nipsnap homolog 3A (C. elegans)                               | ENST00000374767 | -0,624878589 |
| A_23_P80032   | NM_005225        | E2F1           | E2F transcription factor 1                                    | ENST00000343380 | -0,62528561  |
| A_33_P3318966 | NM_173802        | METTL20        | methyltransferase like 20                                     | ENST00000395763 | -0,625336655 |
| A_23_P309739  | NM_000125        | ESR1           | estrogen receptor 1                                           | ENST00000206249 | -0,625421368 |
| A_21_P0014656 | XR_110924        | ARSD-AS1       | ARSD antisense RNA 1 (non-protein coding)                     |                 | -0,625442161 |
| A_33_P3215059 | NM_145080        | NSMCE1         | non-SMC element 1 homolog (S. cerevisiae)                     | ENST00000361439 | -0,625457586 |
| A_33_P3382162 | NM_000449        | RFX5           | regulatory factor X, 5 (influences HLA class II expression)   | ENST00000368870 | -0,625521029 |

|                |                 |                |                                                              |                 |              |
|----------------|-----------------|----------------|--------------------------------------------------------------|-----------------|--------------|
| A_21_P0001336  | ENST00000479252 | LRRC8C         | leucine rich repeat containing 8 family, member C            | ENST00000479252 | -0,625592406 |
| A_23_P67847    | NM_024572       | GALNT14        | UDP-N-acetyl-alpha-D-galactosamine:polypeptide N-acetylgl    | ENST00000356174 | -0,625699902 |
| A_19_P00320602 | BC038559        | LOC100506190   | uncharacterized LOC100506190                                 |                 | -0,625711558 |
| A_23_P44836    | NM_022908       | NT5DC2         | 5'-nucleotidase domain containing 2                          | ENST00000478091 | -0,625815762 |
| A_21_P0007351  | ENST00000530941 | XLOC_009436    |                                                              | ENST00000530941 | -0,625872529 |
| A_23_P115645   | NM_001025076    | CELF2          | CUGBP, Elav-like family member 2                             | ENST00000537122 | -0,626117664 |
| A_33_P3375859  | NR_002712       | CXCR2P1        | chemokine (C-X-C motif) receptor 2 pseudogene 1              | ENST00000439871 | -0,626280737 |
| A_23_P119778   | NM_020342       | SLC39A10       | solute carrier family 39 (zinc transporter), member 10       | ENST00000409086 | -0,626299885 |
| A_23_P29723    | NM_001012410    | SGOL1          | shugoshin-like 1 (S. pombe)                                  | ENST00000383774 | -0,62650225  |
| A_23_P340333   | NM_033397       | ITPRIP         | inositol 1,4,5-trisphosphate receptor interacting protein    | ENST00000358187 | -0,626522541 |
| A_23_P112061   | NM_152419       | HGSNAT         | heparan-alpha-glucosaminide N-acetyltransferase              | ENST00000458501 | -0,626631194 |
| A_23_P336612   | NM_173528       | C15orf26       | chromosome 15 open reading frame 26                          | ENST00000286732 | -0,626700036 |
| A_23_P349882   | NM_005388       | PDCL           | phosducin-like                                               | ENST00000259467 | -0,626714064 |
| A_24_P293530   | NM_178033       | CYP4X1         | cytochrome P450, family 4, subfamily X, polypeptide 1        | ENST00000538609 | -0,626715077 |
| A_32_P62863    | NM_014575       | SCHIP1         | schwannomin interacting protein 1                            | ENST00000412423 | -0,626753064 |
| A_33_P3316456  | NM_001200050    | NPL            | N-acetylneuraminatase pyruvate lyase (dihydrodipicolinate sy | ENST00000258317 | -0,626754718 |
| A_23_P140725   | NM_014714       | IFT140         | intraflagellar transport 140 homolog (Chlamydomonas)         | ENST00000426508 | -0,626758711 |
| A_24_P82493    | NM_024819       | DCAKD          | dephospho-CoA kinase domain containing                       | ENST00000342350 | -0,626792878 |
| A_23_P112061   | NM_152419       | HGSNAT         | heparan-alpha-glucosaminide N-acetyltransferase              | ENST00000458501 | -0,626948459 |
| A_21_P0005644  | TCONS_00014576  | XLOC_006686    |                                                              |                 | -0,62699216  |
| A_33_P3396344  | NR_003713       | LOC728613      | programmed cell death 6 pseudogene                           |                 | -0,627083118 |
| A_33_P3269539  | NM_058174       | COL6A2         | collagen, type VI, alpha 2                                   | ENST00000357838 | -0,627109781 |
| A_23_P104318   | NM_019058       | DDIT4          | DNA-damage-inducible transcript 4                            | ENST00000307365 | -0,627122482 |
| A_19_P00320814 | ENST00000430635 | XLOC_I2_009205 |                                                              | ENST00000430635 | -0,627343008 |
| A_23_P147431   | NM_002350       | LYN            | v-src-1 Yamaguchi sarcoma viral related oncogene homolog     | ENST00000519728 | -0,627453715 |
| A_33_P3226167  | NM_022833       | FAM129B        | family with sequence similarity 129, member B                | ENST00000373312 | -0,627500738 |
| A_24_P220454   | NM_181552       | CUX1           | cut-like homeobox 1                                          | ENST00000360264 | -0,627653314 |
| A_24_P246518   | NM_052892       | PKD1L2         | polycystic kidney disease 1-like 2                           | ENST00000299598 | -0,627722028 |
| A_23_P118      | NM_001439       | EXTL2          | exostoses (multiple)-like 2                                  | ENST00000370114 | -0,627753588 |

|               |                |                |                                                                              |                 |              |
|---------------|----------------|----------------|------------------------------------------------------------------------------|-----------------|--------------|
| A_23_P122724  | NM_004665      | VNN2           | vanin 2                                                                      | ENST00000392389 | -0,62797429  |
| A_24_P114249  | NM_004482      | GALNT3         | UDP-N-acetyl-alpha-D-galactosamine:polypeptide N-acetylglucosyltransferase 3 | ENST00000392701 | -0,628110482 |
| A_23_P145895  | NR_015381      | TP53TG1        | TP53 target 1 (non-protein coding)                                           |                 | -0,628135218 |
| A_23_P147431  | NM_002350      | LYN            | v-src-1 Yamaguchi sarcoma viral related oncogene homolog                     | ENST00000519728 | -0,628729419 |
| A_33_P3309556 | NM_006504      | PTPRE          | protein tyrosine phosphatase, receptor type, E                               |                 | -0,628757424 |
| A_21_P0008148 | TCONS_00021981 | XLOC_010584    |                                                                              |                 | -0,628894858 |
| A_32_P180315  | NM_020893      | C9orf174       | chromosome 9 open reading frame 174                                          | ENST00000529787 | -0,629317597 |
| A_23_P352266  | NM_000633      | BCL2           | B-cell CLL/lymphoma 2                                                        | ENST00000398117 | -0,629428562 |
| A_23_P212284  | NM_015426      | POC1A          | POC1 centriolar protein homolog A (Chlamydomonas)                            | ENST00000394970 | -0,630121502 |
| A_23_P104318  | NM_019058      | DDIT4          | DNA-damage-inducible transcript 4                                            | ENST00000307365 | -0,630206251 |
| A_23_P33364   | NM_001009555   | SH3D19         | SH3 domain containing 19                                                     | ENST00000514152 | -0,630380135 |
| A_21_P0009755 | THC2694211     | XLOC_013284    |                                                                              |                 | -0,630572555 |
| A_24_P318656  | NM_000212      | ITGB3          | integrin, beta 3 (platelet glycoprotein IIIa, antigen CD61)                  | ENST00000262017 | -0,630620732 |
| A_23_P1691    | NM_002421      | MMP1           | matrix metalloproteinase 1 (interstitial collagenase)                        | ENST00000315274 | -0,630650001 |
| A_21_P0012487 | AW963197       | XLOC_l2_010511 |                                                                              |                 | -0,630663525 |
| A_33_P3242578 | XR_110231      | LOC100506731   | uncharacterized LOC100506731                                                 |                 | -0,63070291  |
| A_23_P152838  | NM_002985      | CCL5           | chemokine (C-C motif) ligand 5                                               | ENST00000463941 | -0,630744285 |
| A_23_P126735  | NM_000572      | IL10           | interleukin 10                                                               | ENST00000423557 | -0,630773111 |
| A_24_P81298   | NM_001123355   | PPP6C          | protein phosphatase 6, catalytic subunit                                     | ENST00000373547 | -0,630981803 |
| A_23_P106389  | NM_003612      | SEMA7A         | semaphorin 7A, GPI membrane anchor (John Milton Hagen)                       | ENST00000543145 | -0,630982142 |
| A_33_P3367201 | NM_052845      | MMAB           | methylmalonic aciduria (cobalamin deficiency) cblB type                      |                 | -0,630995758 |
| A_21_P0011514 | NM_001190790   | CDRT15L2       | CMT1A duplicated region transcript 15-like 2                                 | ENST00000399044 | -0,631052637 |
| A_33_P3293187 | NM_007163      | SLC14A2        | solute carrier family 14 (urea transporter), member 2                        | ENST00000323329 | -0,631102473 |
| A_23_P110941  | NM_001512      | GSTA4          | glutathione S-transferase alpha 4                                            | ENST00000370960 | -0,631112238 |
| A_23_P147431  | NM_002350      | LYN            | v-src-1 Yamaguchi sarcoma viral related oncogene homolog                     | ENST00000519728 | -0,631138633 |
| A_23_P370989  | NM_005914      | MCM4           | minichromosome maintenance complex component 4                               | ENST00000521151 | -0,631371301 |
| A_23_P356109  | NM_152749      | ATXN7L1        | ataxin 7-like 1                                                              | ENST00000318724 | -0,631394374 |
| A_33_P3403942 | NM_080721      | C20orf123      | chromosome 20 open reading frame 123                                         | ENST00000279028 | -0,631482765 |
| A_23_P160751  | NM_030764      | FCRL2          | Fc receptor-like 2                                                           | ENST00000368181 | -0,631537328 |

|                |                  |                |                                                              |                 |              |
|----------------|------------------|----------------|--------------------------------------------------------------|-----------------|--------------|
| A_23_P122724   | NM_004665        | VNN2           | vanin 2                                                      | ENST00000392389 | -0,631558699 |
| A_21_P0006881  | TCONS_00018230   | XLOC_008510    |                                                              |                 | -0,631797752 |
| A_32_P76035    | NM_033109        | PNPT1          | polyribonucleotide nucleotidyltransferase 1                  | ENST00000260604 | -0,631816632 |
| A_23_P106389   | NM_003612        | SEMA7A         | semaphorin 7A, GPI membrane anchor (John Milton Hagen        | ENST00000543145 | -0,631836102 |
| A_23_P126735   | NM_000572        | IL10           | interleukin 10                                               | ENST00000423557 | -0,631858656 |
| A_23_P49499    | NM_006456        | ST6GALNAC2     | ST6 (alpha-N-acetyl-neuraminyl-2,3-beta-galactosyl-1,3)-N-   | ENST00000225276 | -0,631879993 |
| A_24_P120907   | NM_021965        | PGM5           | phosphoglucomutase 5                                         | ENST00000496758 | -0,631883759 |
| A_24_P253818   | NM_004475        | FLOT2          | flotillin 2                                                  | ENST00000465427 | -0,631959958 |
| A_19_P00320229 | NR_033896        | FLJ46906       | uncharacterized LOC441172                                    | ENST00000428044 | -0,632008731 |
| A_21_P0010648  | TCONS_I2_0000149 | XLOC_I2_001086 |                                                              |                 | -0,63202365  |
| A_21_P0010412  | TCONS_00029584   | XLOC_014218    |                                                              |                 | -0,632181368 |
| A_21_P0002277  | THC2755124       | XLOC_001640    |                                                              |                 | -0,632327314 |
| A_21_P0001231  | ENST00000437416  | XLOC_001228    |                                                              | ENST00000437416 | -0,632513927 |
| A_33_P3420254  | NM_017802        | HEATR2         | HEAT repeat containing 2                                     | ENST00000313147 | -0,632673104 |
| A_33_P3311165  | XR_111802        | FLJ44313       | FLJ44313 protein                                             | ENST00000532511 | -0,632690207 |
| A_21_P0012729  | THC2524841       | XLOC_I2_010723 |                                                              |                 | -0,632720328 |
| A_23_P340848   | NM_000960        | PTGIR          | prostaglandin I2 (prostacyclin) receptor (IP)                | ENST00000291294 | -0,632830734 |
| A_24_P759477   | NM_002214        | ITGB8          | integrin, beta 8                                             |                 | -0,632992868 |
| A_24_P228717   | NM_002872        | RAC2           | ras-related C3 botulinum toxin substrate 2 (rho family, smal | ENST00000441619 | -0,633036883 |
| A_23_P207400   | NM_007300        | BRCA1          | breast cancer 1, early onset                                 | ENST00000412061 | -0,633040612 |
| A_23_P101084   | NM_032598        | SPATA22        | spermatogenesis associated 22                                | ENST00000541913 | -0,633093775 |
| A_21_P0010326  | TCONS_00029312   | XLOC_014110    |                                                              |                 | -0,633439646 |
| A_33_P3401008  | NM_001085488     | TMEM150B       | transmembrane protein 150B                                   | ENST00000438693 | -0,633484185 |
| A_24_P673063   | NM_001444        | FABP5          | fatty acid binding protein 5 (psoriasis-associated)          | ENST00000477993 | -0,633498377 |
| A_23_P55174    | NM_138387        | G6PC3          | glucose 6 phosphatase, catalytic, 3                          | ENST00000269097 | -0,633557104 |
| A_21_P0014393  | NR_045214        | LOC100507373   | uncharacterized LOC100507373                                 |                 | -0,633886687 |
| A_24_P80500    | NM_020139        | BDH2           | 3-hydroxybutyrate dehydrogenase, type 2                      |                 | -0,633896491 |
| A_32_P68050    | NM_012224        | NEK1           | NIMA (never in mitosis gene a)-related kinase 1              | ENST00000512193 | -0,633979726 |
| A_23_P23279    | NM_052862        | RCS1           | RCS1 domain containing 1                                     | ENST00000367854 | -0,634099871 |

|                |                   |                |                                                              |                 |  |              |
|----------------|-------------------|----------------|--------------------------------------------------------------|-----------------|--|--------------|
| A_21_P0013663  | TCONS_I2_0002940: | XLOC_I2_015239 |                                                              |                 |  | -0,634160238 |
| A_23_P169197   | NM_032303         | HSDL2          | hydroxysteroid dehydrogenase like 2                          | ENST00000398803 |  | -0,634259898 |
| A_24_P916496   | NM_002737         | PRKCA          | protein kinase C, alpha                                      |                 |  | -0,634273134 |
| A_33_P3268532  | NM_001018073      | PCK2           | phosphoenolpyruvate carboxykinase 2 (mitochondrial)          | ENST00000396973 |  | -0,634307057 |
| A_23_P429478   | NM_153038         | CCDC140        | coiled-coil domain containing 140                            | ENST00000295226 |  | -0,634319982 |
| A_33_P3303577  | NM_198563         | TMEM110        | transmembrane protein 110                                    | ENST00000355083 |  | -0,634349499 |
| A_33_P3307735  | NM_002547         | OPHN1          | oligophrenin 1                                               | ENST00000355520 |  | -0,634417708 |
| A_23_P147431   | NM_002350         | LYN            | v-yes-1 Yamaguchi sarcoma viral related oncogene homolog     | ENST00000519728 |  | -0,634526345 |
| A_33_P3347281  | NM_001024075      | HNMT           | histamine N-methyltransferase                                | ENST00000329366 |  | -0,634537552 |
| A_23_P138680   | NM_172200         | IL15RA         | interleukin 15 receptor, alpha                               | ENST00000379972 |  | -0,634689032 |
| A_23_P138507   | NM_001786         | CDK1           | cyclin-dependent kinase 1                                    | ENST00000448257 |  | -0,635176759 |
| A_23_P118246   | NM_016095         | GINS2          | GINS complex subunit 2 (Psf2 homolog)                        | ENST00000253462 |  | -0,635198692 |
| A_19_P00321220 | NR_038303         | LOC100505702   | uncharacterized LOC100505702                                 |                 |  | -0,635466366 |
| A_23_P157736   | NM_032728         | PPAPDC3        | phosphatidic acid phosphatase type 2 domain containing 3     | ENST00000372264 |  | -0,63565922  |
| A_24_P123119   | NM_001966         | EHHADH         | enoyl-CoA, hydratase/3-hydroxyacyl CoA dehydrogenase         | ENST00000231887 |  | -0,635661124 |
| A_24_P272761   | NM_020946         | DENND1A        | DENN/MADD domain containing 1A                               | ENST00000373624 |  | -0,635735786 |
| A_23_P121533   | NM_012445         | SPON2          | spondin 2, extracellular matrix protein                      | ENST00000431380 |  | -0,635886579 |
| A_33_P3352103  | NM_138794         | LYPLAL1        | lysophospholipase-like 1                                     | ENST00000366927 |  | -0,635905137 |
| A_23_P112061   | NM_152419         | HGSNAT         | heparan-alpha-glucosaminide N-acetyltransferase              | ENST00000458501 |  | -0,635940475 |
| A_33_P3303857  | NM_001184714      | SLAMF6         | SLAM family member 6                                         | ENST00000368055 |  | -0,635956582 |
| A_23_P215070   | NM_018718         | CEP41          | centrosomal protein 41kDa                                    | ENST00000223208 |  | -0,635997499 |
| A_33_P3243907  | NM_001909         | CTSD           | cathepsin D                                                  | ENST00000433655 |  | -0,636042752 |
| A_33_P3328051  | NR_036549         | LOC100129961   | uncharacterized LOC100129961                                 | ENST00000413962 |  | -0,63625311  |
| A_19_P00803151 | ENST00000436710   | LOC100506119   |                                                              | ENST00000436710 |  | -0,636410545 |
| A_23_P121222   | NM_020165         | RAD18          | RAD18 homolog (S. cerevisiae)                                | ENST00000264926 |  | -0,636524471 |
| A_23_P416238   | NM_139249         | MS4A6E         | membrane-spanning 4-domains, subfamily A, member 6E          | ENST00000532756 |  | -0,636541667 |
| A_23_P122976   | NM_002069         | GNAI1          | guanine nucleotide binding protein (G protein), alpha inhibi | ENST00000351004 |  | -0,636889448 |
| A_19_P00321636 | THC2548196        | XLOC_014192    |                                                              |                 |  | -0,636905077 |
| A_23_P112061   | NM_152419         | HGSNAT         | heparan-alpha-glucosaminide N-acetyltransferase              | ENST00000458501 |  | -0,637003949 |



|                |                  |                |                                                              |                 |              |
|----------------|------------------|----------------|--------------------------------------------------------------|-----------------|--------------|
| A_23_P104318   | NM_019058        | DDIT4          | DNA-damage-inducible transcript 4                            | ENST00000307365 | -0,637073836 |
| A_23_P382240   | NM_178505        | TMEM26         | transmembrane protein 26                                     | ENST00000399293 | -0,637149941 |
| A_23_P112846   | NM_001144978     | MTHFD2L        | methylenetetrahydrofolate dehydrogenase (NADP+ depend        | ENST00000492183 | -0,637360605 |
| A_23_P101871   | NM_024907        | FBXO17         | F-box protein 17                                             | ENST00000292852 | -0,637437063 |
| A_23_P34835    | NM_005572        | LMNA           | lamin A/C                                                    | ENST00000368301 | -0,637524605 |
| A_21_P0010288  | TCONS_00029157   | XLOC_014102    |                                                              |                 | -0,637541388 |
| A_23_P25030    | NM_003725        | HSD17B6        | hydroxysteroid (17-beta) dehydrogenase 6 homolog (mouse)     | ENST00000554150 | -0,637641517 |
| A_33_P3243093  | NM_003617        | RGS5           | regulator of G-protein signaling 5                           | ENST00000313961 | -0,637682103 |
| A_33_P3270599  | NM_213674        | TPM2           | tropomyosin 2 (beta)                                         | ENST00000329305 | -0,637822558 |
| A_23_P147431   | NM_002350        | LYN            | v-yes-1 Yamaguchi sarcoma viral related oncogene homolog     | ENST00000519728 | -0,637903399 |
| A_33_P3280213  | NM_001127695     | CTSA           | cathepsin A                                                  | ENST00000372459 | -0,637957134 |
| A_33_P3393766  | NM_001130677     | C17orf96       | chromosome 17 open reading frame 96                          | ENST00000325814 | -0,637971694 |
| A_23_P106602   | NM_031476        | CRISPLD2       | cysteine-rich secretory protein LCCL domain containing 2     | ENST00000262424 | -0,638022072 |
| A_33_P3415551  | NM_207328        | GPAT2          | glycerol-3-phosphate acyltransferase 2, mitochondrial        | ENST00000377137 | -0,638028111 |
| A_21_P0003772  | TCONS_00008581   | XLOC_004091    |                                                              |                 | -0,638065246 |
| A_23_P112061   | NM_152419        | HGSNAT         | heparan-alpha-glucosaminide N-acetyltransferase              | ENST00000458501 | -0,638238316 |
| A_23_P151907   | NM_002570        | PCSK6          | proprotein convertase subtilisin/kexin type 6                | ENST00000348070 | -0,638495328 |
| A_24_P243741   | NM_021721        | ADAM22         | ADAM metallopeptidase domain 22                              | ENST00000398201 | -0,638548679 |
| A_23_P115872   | NM_018131        | CEP55          | centrosomal protein 55kDa                                    | ENST00000371485 | -0,638574246 |
| A_23_P106389   | NM_003612        | SEMA7A         | semaphorin 7A, GPI membrane anchor (John Milton Hagen        | ENST00000543145 | -0,638651671 |
| A_21_P0010697  | NR_023918        | LINC00339      | long intergenic non-protein coding RNA 339                   |                 | -0,638796464 |
| A_23_P133133   | NM_025144        | ALPK1          | alpha-kinase 1                                               | ENST00000505127 | -0,639129693 |
| A_21_P0009172  | ENST00000509943  | XLOC_012240    |                                                              | ENST00000509943 | -0,6391877   |
| A_19_P00319578 | THC2524841       | XLOC_I2_010723 |                                                              |                 | -0,639333136 |
| A_21_P0012423  | TCONS_I2_0001907 | XLOC_I2_010056 |                                                              |                 | -0,639553384 |
| A_23_P76386    | NM_003044        | SLC6A12        | solute carrier family 6 (neurotransmitter transporter, beta) | ENST00000424061 | -0,639574738 |
| A_33_P3703501  | NM_198321        | GALNT10        | UDP-N-acetyl-alpha-D-galactosamine:polypeptide N-acetylgl    | ENST00000520647 | -0,639793027 |
| A_23_P35456    | NM_014631        | SH3PXD2A       | SH3 and PX domains 2A                                        | ENST00000355946 | -0,639802133 |
| A_23_P118815   | NM_001012271     | BIRC5          | baculoviral IAP repeat containing 5                          | ENST00000301633 | -0,639817317 |

|                |                                 |                |                                                               |  |                 |              |
|----------------|---------------------------------|----------------|---------------------------------------------------------------|--|-----------------|--------------|
| A_21_P0011685  | TCONS_I2_0001242(XLOC_I2_006665 |                |                                                               |  |                 | -0,639821654 |
| A_24_P382026   | NM_020679                       | MIF4GD         | MIF4G domain containing                                       |  | ENST00000325102 | -0,639853341 |
| A_23_P38346    | NM_024119                       | DHX58          | DEXH (Asp-Glu-X-His) box polypeptide 58                       |  | ENST00000423748 | -0,640004183 |
| A_21_P0010386  | NR_027036                       | LOC100271722   | uncharacterized LOC100271722                                  |  |                 | -0,640028391 |
| A_33_P3230548  | NM_014875                       | KIF14          | kinesin family member 14                                      |  | ENST00000367350 | -0,640088105 |
| A_21_P0012626  | BC032464                        | XLOC_I2_010897 |                                                               |  |                 | -0,640127581 |
| A_24_P298013   | NM_019096                       | GTPBP2         | GTP binding protein 2                                         |  | ENST00000434548 | -0,640134622 |
| A_19_P00322933 | NR_038955                       | LOC100506190   | uncharacterized LOC100506190                                  |  |                 | -0,640137141 |
| A_23_P112452   | NR_003191                       | GGTA1P         | glycoprotein, alpha-galactosyltransferase 1 pseudogene        |  | ENST00000373793 | -0,640178549 |
| A_23_P104318   | NM_019058                       | DDIT4          | DNA-damage-inducible transcript 4                             |  | ENST00000307365 | -0,640255224 |
| A_23_P126735   | NM_000572                       | IL10           | interleukin 10                                                |  | ENST00000423557 | -0,640404375 |
| A_23_P87982    | NM_001676                       | ATP12A         | ATPase, H+/K+ transporting, nongastric, alpha polypeptide     |  | ENST00000381946 | -0,640443064 |
| A_24_P943781   | NM_024913                       | C7orf58        | chromosome 7 open reading frame 58                            |  | ENST00000310396 | -0,640451928 |
| A_23_P126735   | NM_000572                       | IL10           | interleukin 10                                                |  | ENST00000423557 | -0,640732083 |
| A_23_P130856   | NM_032816                       | CEP89          | centrosomal protein 89kDa                                     |  | ENST00000305768 | -0,640751645 |
| A_33_P3213169  | AK309642                        | ITGAX          | integrin, alpha X (complement component 3 receptor 4 subunit) |  |                 | -0,640913627 |
| A_23_P112061   | NM_152419                       | HGSNAT         | heparan-alpha-glucosaminide N-acetyltransferase               |  | ENST00000458501 | -0,641068088 |
| A_23_P147431   | NM_002350                       | LYN            | v-yes-1 Yamaguchi sarcoma viral related oncogene homolog      |  | ENST00000519728 | -0,641332608 |
| A_24_P336584   | NM_182664                       | RASSF5         | Ras association (RalGDS/AF-6) domain family member 5          |  | ENST00000367118 | -0,641354674 |
| A_23_P255618   | NM_080723                       | NRSN1          | neurensin 1                                                   |  | ENST00000378491 | -0,641671291 |
| A_21_P0013796  | NM_002032                       | FTH1           | ferritin, heavy polypeptide 1                                 |  | ENST00000534719 | -0,641782569 |
| A_23_P112452   | NR_003191                       | GGTA1P         | glycoprotein, alpha-galactosyltransferase 1 pseudogene        |  | ENST00000373793 | -0,642146506 |
| A_23_P434919   | NM_152304                       | RAB42          | RAB42, member RAS oncogene family                             |  | ENST00000465518 | -0,642327192 |
| A_21_P0009096  | TCONS_00024822                  | XLOC_011681    |                                                               |  |                 | -0,642421854 |
| A_21_P0006369  | NR_027442                       | LOC100288842   | UDP-GlcNAc:betaGal beta-1,3-N-acetylglucosaminyltransferase   |  | ENST00000437707 | -0,642463503 |
| A_33_P3305731  | NM_025176                       | NINL           | ninein-like                                                   |  | ENST00000278886 | -0,642502136 |
| A_23_P300600   | NM_021076                       | NEFH           | neurofilament, heavy polypeptide                              |  | ENST00000310624 | -0,642508681 |
| A_23_P104876   | NM_017425                       | SPA17          | sperm autoantigenic protein 17                                |  | ENST00000524614 | -0,642637469 |
| A_23_P29005    | NM_022136                       | SAMSN1         | SAM domain, SH3 domain and nuclear localization signals 1     |  | ENST00000400566 | -0,64264533  |

|               |                 |                |                                                              |                 |              |
|---------------|-----------------|----------------|--------------------------------------------------------------|-----------------|--------------|
| A_24_P18146   | NM_015310       | PSD3           | pleckstrin and Sec7 domain containing 3                      | ENST00000286485 | -0,64267447  |
| A_32_P42964   | NM_001145712    | LOC389493      | uncharacterized LOC389493                                    | ENST00000452565 | -0,642964882 |
| A_23_P6535    | NM_138433       | KLHDC7B        | kelch domain containing 7B                                   | ENST00000395676 | -0,642997462 |
| A_33_P3372332 | NM_000101       | CYBA           | cytochrome b-245, alpha polypeptide                          | ENST00000261623 | -0,643098996 |
| A_23_P112846  | NM_001144978    | MTHFD2L        | methylenetetrahydrofolate dehydrogenase (NADP+ depend        | ENST00000492183 | -0,64323575  |
| A_24_P144303  | NR_024608       | LOC442459      | X-ray repair complementing defective repair pseudogene       |                 | -0,643304231 |
| A_21_P0009504 | TCONS_00026374  | XLOC_012725    |                                                              |                 | -0,643368133 |
| A_33_P3356361 | NR_040059       | LOC100131089   | uncharacterized LOC100131089                                 |                 | -0,643397007 |
| A_21_P0014580 | XR_110374       | LOC100507195   | uncharacterized LOC100507195                                 |                 | -0,643448053 |
| A_21_P0005674 | BU195360        | XLOC_006743    |                                                              |                 | -0,643763105 |
| A_23_P77401   | NM_018340       | CPPED1         | calcineurin-like phosphoesterase domain containing 1         | ENST00000433677 | -0,643803282 |
| A_23_P170574  | NM_178310       | SNAI3          | snail homolog 3 (Drosophila)                                 | ENST00000332281 | -0,644005063 |
| A_24_P276102  | NM_183404       | RBL1           | retinoblastoma-like 1 (p107)                                 | ENST00000344359 | -0,644042022 |
| A_33_P3281816 | NM_006367       | CAP1           | CAP, adenylate cyclase-associated protein 1 (yeast)          | ENST00000449311 | -0,644080824 |
| A_24_P151121  | AK056201        | A1BG           | alpha-1-B glycoprotein                                       |                 | -0,644339629 |
| A_23_P83976   | NM_145036       | CEP112         | centrosomal protein 112kDa                                   | ENST00000537949 | -0,644567392 |
| A_33_P3371219 | NM_002998       | SDC2           | syndecan 2                                                   |                 | -0,644594269 |
| A_21_P0012477 | THC2685486      | XLOC_I2_010493 |                                                              |                 | -0,644674938 |
| A_23_P379614  | NM_007280       | OIP5           | Opa interacting protein 5                                    | ENST00000220514 | -0,644760532 |
| A_23_P104318  | NM_019058       | DDIT4          | DNA-damage-inducible transcript 4                            | ENST00000307365 | -0,644861933 |
| A_23_P104318  | NM_019058       | DDIT4          | DNA-damage-inducible transcript 4                            | ENST00000307365 | -0,645100872 |
| A_33_P3221859 | NM_003030       | SHOX2          | short stature homeobox 2                                     | ENST00000313019 | -0,645172585 |
| A_23_P104318  | NM_019058       | DDIT4          | DNA-damage-inducible transcript 4                            | ENST00000307365 | -0,645181201 |
| A_23_P216894  | NM_001006617    | MAPKAP1        | mitogen-activated protein kinase associated protein 1        | ENST00000373505 | -0,645487673 |
| A_21_P0010040 | TCONS_00028390  | XLOC_013744    |                                                              |                 | -0,645611435 |
| A_23_P119266  | NM_001375       | DNASE2         | deoxyribonuclease II, lysosomal                              | ENST00000538460 | -0,646056193 |
| A_21_P0011264 | ENST00000554945 | XLOC_I2_004371 |                                                              | ENST00000554945 | -0,646400871 |
| A_33_P3249534 | NM_005382       | NEFM           | neurofilament, medium polypeptide                            | ENST00000221166 | -0,646527199 |
| A_33_P3335571 | NR_029192       | LOC100133315   | transient receptor potential cation channel, subfamily C, me | ENST00000532852 | -0,646639546 |

|               |                |                |                                                                       |                 |              |
|---------------|----------------|----------------|-----------------------------------------------------------------------|-----------------|--------------|
| A_21_P0002633 | TCONS_00005038 | XLOC_001910    |                                                                       |                 | -0,646959929 |
| A_23_P206920  | NM_001040114   | MYH11          | myosin, heavy chain 11, smooth muscle                                 | ENST00000396324 | -0,647101441 |
| A_24_P111242  | NM_148893      | SVIP           | small VCP/p97-interacting protein                                     | ENST00000354193 | -0,647165136 |
| A_32_P21474   | NM_001010844   | IRAK1BP1       | interleukin-1 receptor-associated kinase 1 binding protein 1          | ENST00000369940 | -0,647283211 |
| A_21_P0013056 | THC2730466     | XLOC_I2_012847 |                                                                       |                 | -0,647562495 |
| A_23_P118246  | NM_016095      | GINS2          | GINS complex subunit 2 (Psf2 homolog)                                 | ENST00000253462 | -0,647763651 |
| A_23_P110624  | NM_001332      | CTNND2         | catenin (cadherin-associated protein), delta 2 (neural plakob         | ENST00000538638 | -0,647864416 |
| A_21_P0007174 | TCONS_00019235 | XLOC_009065    |                                                                       |                 | -0,647876429 |
| A_21_P0005596 | THC2758993     | XLOC_006350    |                                                                       |                 | -0,648128962 |
| A_24_P659836  | NM_001123225   | SYCE3          | synaptonemal complex central element protein 3                        | ENST00000406915 | -0,648169884 |
| A_23_P142075  | NM_001611      | ACP5           | acid phosphatase 5, tartrate resistant                                | ENST00000218758 | -0,648212066 |
| A_23_P144916  | NM_005110      | GFPT2          | glutamine-fructose-6-phosphate transaminase 2                         | ENST00000253778 | -0,64823588  |
| A_33_P3246283 | AK128439       | VAC14          | Vac14 homolog ( <i>S. cerevisiae</i> )                                |                 | -0,648245347 |
| A_23_P138507  | NM_001786      | CDK1           | cyclin-dependent kinase 1                                             | ENST00000448257 | -0,648274772 |
| A_23_P151710  | NM_000956      | PTGER2         | prostaglandin E receptor 2 (subtype EP2), 53kDa                       | ENST00000245457 | -0,648436173 |
| A_24_P82106   | NM_004995      | MMP14          | matrix metalloproteinase 14 (membrane-inserted)                       | ENST00000311852 | -0,64853362  |
| A_23_P319617  | NM_019886      | CHST7          | carbohydrate (N-acetylglucosamine 6-O) sulfotransferase 7             | ENST00000276055 | -0,648628559 |
| A_23_P105545  | NM_016830      | VAMP1          | vesicle-associated membrane protein 1 (synaptobrevin 1)               | ENST00000535927 | -0,648657773 |
| A_23_P259127  | NM_017697      | ESRP1          | epithelial splicing regulatory protein 1                              | ENST00000517556 | -0,648755726 |
| A_23_P109171  | NM_001195      | BFSP1          | beaded filament structural protein 1, filensin                        | ENST00000536626 | -0,648902781 |
| A_21_P0000799 | NR_038430      | LOC100506054   | uncharacterized LOC100506054                                          |                 | -0,649080304 |
| A_24_P937405  | NM_007173      | PRSS23         | protease, serine, 23                                                  | ENST00000280258 | -0,649307044 |
| A_23_P404494  | NM_002185      | IL7R           | interleukin 7 receptor                                                | ENST00000343305 | -0,649347172 |
| A_21_P0001620 | TCONS_00001811 | XLOC_001195    |                                                                       |                 | -0,649453077 |
| A_21_P0008445 | TCONS_00022761 | XLOC_011044    |                                                                       |                 | -0,649572356 |
| A_24_P100234  | NM_014941      | MORC2          | MORC family CW-type zinc finger 2                                     | ENST00000397641 | -0,649579041 |
| A_33_P3309110 | NR_040089      | LOC100506713   | uncharacterized LOC100506713                                          | ENST00000399541 | -0,64968737  |
| A_23_P258393  | NM_144641      | PPM1M          | protein phosphatase, Mg <sup>2+</sup> /Mn <sup>2+</sup> dependent, 1M | ENST00000323588 | -0,649758698 |
| A_33_P3381513 | NM_014143      | CD274          | CD274 molecule                                                        | ENST00000492923 | -0,649763468 |

|               |                  |                |                                                                                   |                 |              |
|---------------|------------------|----------------|-----------------------------------------------------------------------------------|-----------------|--------------|
| A_23_P252740  | NM_024094        | DSCC1          | defective in sister chromatid cohesion 1 homolog (S. cerevisiae)                  | ENST00000313655 | -0,650123142 |
| A_23_P201264  | NM_022787        | NMNAT1         | nicotinamide nucleotide adenylyltransferase 1                                     | ENST00000377205 | -0,650329683 |
| A_23_P152002  | NM_004049        | BCL2A1         | BCL2-related protein A1                                                           | ENST00000267953 | -0,650377601 |
| A_23_P138507  | NM_001786        | CDK1           | cyclin-dependent kinase 1                                                         | ENST00000448257 | -0,650736581 |
| A_23_P130787  | NM_017659        | QPCTL          | glutaminyl-peptide cyclotransferase-like                                          | ENST00000012049 | -0,651049713 |
| A_21_P0001958 | ENST00000440326  | XLOC_001826    |                                                                                   | ENST00000440326 | -0,651061913 |
| A_23_P352266  | NM_000633        | BCL2           | B-cell CLL/lymphoma 2                                                             | ENST00000398117 | -0,651492558 |
| A_21_P0006876 | TCONS_00018215   | XLOC_008495    |                                                                                   |                 | -0,651694676 |
| A_21_P0011347 | ENST00000338567  | XLOC_I2_004840 |                                                                                   | ENST00000338567 | -0,651768323 |
| A_23_P212126  | NM_080538        | COLQ           | collagen-like tail subunit (single strand of homotrimer) of alpha2(I) procollagen | ENST00000383788 | -0,65176988  |
| A_23_P147431  | NM_002350        | LYN            | v-src-1 Yamaguchi sarcoma viral related oncogene homolog                          | ENST00000519728 | -0,651785857 |
| A_23_P103511  | NM_001085375     | C1orf226       | chromosome 1 open reading frame 226                                               | ENST00000458626 | -0,651888525 |
| A_23_P300150  | NM_172387        | NFATC1         | nuclear factor of activated T-cells, cytoplasmic, calcineurin-dependent 1         | ENST00000318065 | -0,652205326 |
| A_21_P0005840 | ENST00000531654  | XLOC_007093    |                                                                                   | ENST00000531654 | -0,652295289 |
| A_32_P171061  | NM_005170        | ASCL2          | achaete-scute complex homolog 2 (Drosophila)                                      | ENST00000331289 | -0,652721641 |
| A_21_P0012909 | TCONS_I2_0002293 | XLOC_I2_012071 |                                                                                   |                 | -0,652902415 |
| A_33_P3281171 | NR_024469        | LOC100130987   | uncharacterized LOC100130987                                                      |                 | -0,652910348 |
| A_23_P119102  | NM_003370        | VASP           | vasodilator-stimulated phosphoprotein                                             | ENST00000245932 | -0,653045217 |
| A_21_P0014356 | XR_109436        | LOC100507425   | uncharacterized LOC100507425                                                      |                 | -0,653320918 |
| A_24_P257579  | NM_022140        | EPB41L4A       | erythrocyte membrane protein band 4.1 like 4A                                     | ENST00000515047 | -0,653506685 |
| A_21_P0012398 | TCONS_I2_0001886 | XLOC_I2_009888 |                                                                                   |                 | -0,653536999 |
| A_23_P151150  | NM_202002        | FOXM1          | forkhead box M1                                                                   | ENST00000359843 | -0,653638192 |
| A_23_P427502  | NM_001206998     | ZNRF3          | zinc and ring finger 3                                                            | ENST00000544604 | -0,653640169 |
| A_23_P118246  | NM_016095        | GINS2          | GINS complex subunit 2 (Psf2 homolog)                                             | ENST00000253462 | -0,653718544 |
| A_23_P104318  | NM_019058        | DDIT4          | DNA-damage-inducible transcript 4                                                 | ENST00000307365 | -0,653793782 |
| A_21_P0010261 | THC2775863       | XLOC_013968    |                                                                                   |                 | -0,653844977 |
| A_33_P3352578 | NM_080387        | CLEC4D         | C-type lectin domain family 4, member D                                           | ENST00000382064 | -0,65386751  |
| A_23_P166408  | NM_020530        | OSM            | oncostatin M                                                                      | ENST00000215781 | -0,653965086 |
| A_23_P126735  | NM_000572        | IL10           | interleukin 10                                                                    | ENST00000423557 | -0,654012903 |



|               |                 |             |                                                                              |                 |              |
|---------------|-----------------|-------------|------------------------------------------------------------------------------|-----------------|--------------|
| A_23_P118246  | NM_016095       | GINS2       | GINS complex subunit 2 (Psf2 homolog)                                        | ENST00000253462 | -0,654066194 |
| A_23_P207400  | NM_007300       | BRCA1       | breast cancer 1, early onset                                                 | ENST00000412061 | -0,654067041 |
| A_23_P103310  | NM_002963       | S100A7      | S100 calcium binding protein A7                                              | ENST00000368723 | -0,654141605 |
| A_33_P3237393 | NM_003440       | ZNF140      | zinc finger protein 140                                                      |                 | -0,654195189 |
| A_33_P3435493 | XR_110483       | LOC400768   | uncharacterized LOC400768                                                    |                 | -0,654329164 |
| A_24_P109633  | NM_001142594    | ITPK1       | inositol-tetrakisphosphate 1-kinase                                          | ENST00000354313 | -0,654376525 |
| A_23_P139418  | NM_198516       | GALNTL4     | UDP-N-acetyl-alpha-D-galactosamine:polypeptide N-acetylglucosyltransferase 4 | ENST00000227756 | -0,654523981 |
| A_23_P104318  | NM_019058       | DDIT4       | DNA-damage-inducible transcript 4                                            | ENST00000307365 | -0,654561268 |
| A_23_P112452  | NR_003191       | GGTA1P      | glycoprotein, alpha-galactosyltransferase 1 pseudogene                       | ENST00000373793 | -0,654668431 |
| A_24_P928510  | NM_053055       | THEM4       | thioesterase superfamily member 4                                            | ENST00000368814 | -0,654858275 |
| A_24_P205589  | NM_007274       | ACOT7       | acyl-CoA thioesterase 7                                                      | ENST00000481175 | -0,654863845 |
| A_33_P3441576 | BC036880        | SRGAP2P1    | SLIT-ROBO Rho GTPase activating protein 2 pseudogene 1                       | ENST00000467419 | -0,654872064 |
| A_21_P0004430 | TCONS_00010438  | XLOC_004954 |                                                                              |                 | -0,654873543 |
| A_33_P3409159 | NM_015482       | SLC22A23    | solute carrier family 22, member 23                                          | ENST00000406686 | -0,654887237 |
| A_23_P96833   | NM_033438       | SLAMF9      | SLAM family member 9                                                         | ENST00000368093 | -0,654909309 |
| A_21_P0000742 | NR_038266       | MYLK-AS1    | MYLK antisense RNA 1 (non-protein coding)                                    |                 | -0,655167753 |
| A_23_P104318  | NM_019058       | DDIT4       | DNA-damage-inducible transcript 4                                            | ENST00000307365 | -0,655351207 |
| A_21_P0002805 | ENST00000467896 | XLOC_002921 |                                                                              | ENST00000467896 | -0,655387591 |
| A_23_P22224   | NM_004095       | EIF4EBP1    | eukaryotic translation initiation factor 4E binding protein 1                | ENST00000338825 | -0,65539783  |
| A_21_P0006669 | ENST00000434552 | XLOC_008447 |                                                                              | ENST00000434552 | -0,655991296 |
| A_23_P34788   | NM_006845       | KIF2C       | kinesin family member 2C                                                     | ENST00000372218 | -0,656054703 |
| A_33_P3350583 | NM_138819       | FAM122C     | family with sequence similarity 122C                                         | ENST00000370784 | -0,656094395 |
| A_23_P126623  | NM_002631       | PGD         | phosphogluconate dehydrogenase                                               | ENST00000541529 | -0,656279424 |
| A_23_P122508  | NM_080870       | DPCR1       | diffuse panbronchiolitis critical region 1                                   | ENST00000414703 | -0,656394259 |
| A_32_P21246   | NR_026791       | HCG27       | HLA complex group 27 (non-protein coding)                                    | ENST00000416551 | -0,656513633 |
| A_21_P0008994 | TCONS_00024504  | XLOC_011823 |                                                                              |                 | -0,656776215 |
| A_23_P154875  | NM_012105       | BACE2       | beta-site APP-cleaving enzyme 2                                              | ENST00000330333 | -0,656829898 |
| A_33_P3280700 | NM_024980       | GPR157      | G protein-coupled receptor 157                                               | ENST00000414642 | -0,657026513 |
| A_23_P126735  | NM_000572       | IL10        | interleukin 10                                                               | ENST00000423557 | -0,657238421 |

|                |                 |                |                                                                       |                 |              |
|----------------|-----------------|----------------|-----------------------------------------------------------------------|-----------------|--------------|
| A_24_P355145   | NM_033105       | DNAJC5B        | DnaJ (Hsp40) homolog, subfamily C, member 5 beta                      | ENST00000524076 | -0,657314078 |
| A_24_P100830   | NM_001113402    | AMN1           | antagonist of mitotic exit network 1 homolog ( <i>S. cerevisiae</i> ) | ENST00000281471 | -0,657346877 |
| A_33_P3576317  | BC044924        | LOC340178      | uncharacterized LOC340178                                             | ENST00000444586 | -0,657545285 |
| A_23_P111995   | NM_002318       | LOXL2          | lysyl oxidase-like 2                                                  | ENST00000389131 | -0,657561811 |
| A_23_P122052   | NM_001008397    | GPX8           | glutathione peroxidase 8 (putative)                                   | ENST00000503787 | -0,657873952 |
| A_19_P00321761 | ENST00000412979 | XLOC_002310    |                                                                       | ENST00000412979 | -0,657930642 |
| A_23_P100127   | NM_170589       | CASC5          | cancer susceptibility candidate 5                                     | ENST00000260369 | -0,658158006 |
| A_23_P122052   | NM_001008397    | GPX8           | glutathione peroxidase 8 (putative)                                   | ENST00000503787 | -0,658187968 |
| A_24_P303091   | NM_001565       | CXCL10         | chemokine (C-X-C motif) ligand 10                                     | ENST00000306602 | -0,658608601 |
| A_23_P118815   | NM_001012271    | BIRC5          | baculoviral IAP repeat containing 5                                   | ENST00000301633 | -0,658619836 |
| A_23_P138507   | NM_001786       | CDK1           | cyclin-dependent kinase 1                                             | ENST00000448257 | -0,65870036  |
| A_21_P0000538  | NR_027469       | LOC100286793   | uncharacterized LOC100286793                                          |                 | -0,658716131 |
| A_23_P3302     | NM_018365       | MNS1           | meiosis-specific nuclear structural 1                                 | ENST00000260453 | -0,65875316  |
| A_19_P00806771 | XR_132670       | LOC100652730   | uncharacterized LOC100652730                                          | ENST00000412500 | -0,658784894 |
| A_21_P0010712  | ENST00000451023 | XLOC_l2_000342 |                                                                       | ENST00000451023 | -0,658875219 |
| A_23_P215997   | NM_000498       | CYP11B2        | cytochrome P450, family 11, subfamily B, polypeptide 2                | ENST00000323110 | -0,659148825 |
| A_23_P385861   | NM_152562       | CDCA2          | cell division cycle associated 2                                      | ENST00000435898 | -0,659158274 |
| A_23_P112452   | NR_003191       | GGTA1P         | glycoprotein, alpha-galactosyltransferase 1 pseudogene                | ENST00000373793 | -0,659278538 |
| A_23_P388190   | NM_033081       | DIDO1          | death inducer-obliterator 1                                           | ENST00000461792 | -0,659417501 |
| A_23_P119778   | NM_020342       | SLC39A10       | solute carrier family 39 (zinc transporter), member 10                | ENST00000409086 | -0,659419804 |
| A_33_P3380457  | NM_022049       | GPR88          | G protein-coupled receptor 88                                         | ENST00000315033 | -0,659462479 |
| A_33_P3365760  | NM_012108       | STAP1          | signal transducing adaptor family member 1                            | ENST00000396225 | -0,659541497 |
| A_33_P3610406  | NR_028501       | ECEL1P2        | endothelin converting enzyme-like 1, pseudogene 2                     | ENST00000461596 | -0,659576751 |
| A_33_P3897698  | XR_108300       | LOC100147773   | uncharacterized LOC100147773                                          |                 | -0,660148126 |
| A_33_P3249746  | NM_001190484    | CYP3A5         | cytochrome P450, family 3, subfamily A, polypeptide 5                 | ENST00000343703 | -0,660545149 |
| A_32_P456318   | NM_080743       | SRSF12         | serine/arginine-rich splicing factor 12                               | ENST00000452027 | -0,660681377 |
| A_23_P138507   | NM_001786       | CDK1           | cyclin-dependent kinase 1                                             | ENST00000448257 | -0,660851795 |
| A_33_P3313283  | NM_153221       | CILP2          | cartilage intermediate layer protein 2                                | ENST00000291495 | -0,660975528 |
| A_33_P3296366  | NM_015720       | PODXL2         | podocalyxin-like 2                                                    | ENST00000302192 | -0,660976394 |

|               |                 |              |                                                               |                 |              |
|---------------|-----------------|--------------|---------------------------------------------------------------|-----------------|--------------|
| A_23_P147431  | NM_002350       | LYN          | v-yes-1 Yamaguchi sarcoma viral related oncogene homolog      | ENST00000519728 | -0,661023783 |
| A_23_P86283   | NM_006762       | LAPTM5       | lysosomal protein transmembrane 5                             | ENST00000294507 | -0,661313292 |
| A_24_P589266  | NM_001099289    | SH3RF3       | SH3 domain containing ring finger 3                           | ENST00000444352 | -0,661372748 |
| A_23_P370569  | NM_152440       | C12orf66     | chromosome 12 open reading frame 66                           | ENST00000398055 | -0,661407446 |
| A_21_P0013802 | NM_018196       | TMLHE        | trimethyllysine hydroxylase, epsilon                          | ENST00000334398 | -0,661614721 |
| A_23_P118815  | NM_001012271    | BIRC5        | baculoviral IAP repeat containing 5                           | ENST00000301633 | -0,661634362 |
| A_24_P328872  | NM_012073       | CCT5         | chaperonin containing TCP1, subunit 5 (epsilon)               | ENST00000280326 | -0,662027293 |
| A_33_P3376116 | NM_182513       | SPC24        | SPC24, NDC80 kinetochore complex component, homolog (         | ENST00000423327 | -0,662176941 |
| A_24_P313418  | NM_002990       | CCL22        | chemokine (C-C motif) ligand 22                               | ENST00000219235 | -0,662187762 |
| A_33_P3329326 | ENST00000374025 | CD164L2      | CD164 sialomucin-like 2                                       | ENST00000374025 | -0,662266642 |
| A_23_P341567  | NM_178833       | SLC9B2       | solute carrier family 9, subfamily B (cation proton antiporte | ENST00000339611 | -0,662376828 |
| A_33_P3360077 | AK128206        | LOC100130745 | uncharacterized LOC100130745                                  |                 | -0,662430431 |
| A_23_P209933  | NM_006464       | TGOLN2       | trans-golgi network protein 2                                 | ENST00000377386 | -0,662638004 |
| A_23_P43273   | NM_000127       | EXT1         | exostosin 1                                                   | ENST00000437196 | -0,662808216 |
| A_24_P58337   | NM_002032       | FTH1         | ferritin, heavy polypeptide 1                                 | ENST00000534719 | -0,662863402 |
| A_24_P12435   | NM_181782       | NCOA7        | nuclear receptor coactivator 7                                | ENST00000368357 | -0,662873944 |
| A_23_P149813  | NM_012425       | RSU1         | Ras suppressor protein 1                                      | ENST00000377921 | -0,662910044 |
| A_21_P0014520 | XR_110190       | LOC100505475 | uncharacterized LOC100505475                                  |                 | -0,663201357 |
| A_23_P3602    | NM_001243657    | NUDT7        | nudix (nucleoside diphosphate linked moiety X)-type motif     | ENST00000268533 | -0,663293302 |
| A_21_P0000021 | NM_001159280    | ADAL         | adenosine deaminase-like                                      | ENST00000422466 | -0,663488111 |
| A_23_P61551   | NM_006110       | CD2BP2       | CD2 (cytoplasmic tail) binding protein 2                      | ENST00000305596 | -0,663588437 |
| A_21_P0001418 | TCONS_00001268  | XLOC_000555  |                                                               |                 | -0,663643887 |
| A_24_P403417  | NM_004878       | PTGES        | prostaglandin E synthase                                      | ENST00000481476 | -0,664061184 |
| A_23_P100539  | NM_001171       | ABCC6        | ATP-binding cassette, sub-family C (CFTR/MRP), member 6       | ENST00000205558 | -0,664173887 |
| A_24_P417162  | NM_005647       | TBL1X        | transducin (beta)-like 1X-linked                              | ENST00000217964 | -0,664178444 |
| A_23_P160214  | NM_001080494    | TTC39A       | tetratricopeptide repeat domain 39A                           | ENST00000451380 | -0,664196888 |
| A_33_P3397399 | ENST00000394822 | PPP3CB       | protein phosphatase 3, catalytic subunit, beta isozyme        | ENST00000394822 | -0,664293714 |
| A_21_P0010453 | AL137569        | LOC100271722 | uncharacterized LOC100271722                                  |                 | -0,664413282 |
| A_23_P352266  | NM_000633       | BCL2         | B-cell CLL/lymphoma 2                                         | ENST00000398117 | -0,664684711 |

|               |                   |                |                                                                        |                 |              |
|---------------|-------------------|----------------|------------------------------------------------------------------------|-----------------|--------------|
| A_23_P88731   | NM_002875         | RAD51          | RAD51 homolog ( <i>S. cerevisiae</i> )                                 | ENST00000525066 | -0,664810132 |
| A_21_P0011983 | ENST00000432711   | XLOC_I2_008396 |                                                                        | ENST00000432711 | -0,664815507 |
| A_21_P0005927 | ENST00000520646   | XLOC_006726    |                                                                        | ENST00000520646 | -0,664965607 |
| A_24_P57528   | NM_139177         | SLC39A11       | solute carrier family 39 (metal ion transporter), member 11            | ENST00000542342 | -0,665083032 |
| A_24_P265832  | NM_033050         | SUCNR1         | succinate receptor 1                                                   | ENST00000362032 | -0,665179488 |
| A_23_P320578  | NM_002928         | RGS16          | regulator of G-protein signaling 16                                    | ENST00000367558 | -0,665384573 |
| A_21_P0010452 | NR_027036         | LOC100271722   | uncharacterized LOC100271722                                           |                 | -0,665605646 |
| A_24_P597190  | NR_027503         | LOC100133050   | glucuronidase, beta pseudogene                                         |                 | -0,665671873 |
| A_23_P10518   | NM_016521         | TFDP3          | transcription factor Dp family, member 3                               | ENST00000310125 | -0,665704341 |
| A_33_P3286859 | NM_016529         | ATP8A2         | ATPase, aminophospholipid transporter, class I, type 8A, mitochondrial | ENST00000255283 | -0,66578943  |
| A_23_P334218  | NM_145647         | WDR67          | WD repeat domain 67                                                    | ENST00000287380 | -0,665936598 |
| A_21_P0012241 | TCONS_I2_00017559 | XLOC_I2_009281 |                                                                        |                 | -0,665966408 |
| A_23_P41424   | NM_022154         | SLC39A8        | solute carrier family 39 (zinc transporter), member 8                  | ENST00000394833 | -0,666087278 |
| A_23_P6596    | NM_005524         | HES1           | hairy and enhancer of split 1, ( <i>Drosophila</i> )                   | ENST00000476918 | -0,666124924 |
| A_23_P13094   | NM_002425         | MMP10          | matrix metalloproteinase 10 (stromelysin 2)                            | ENST00000279441 | -0,666232015 |
| A_21_P0012676 | NR_026575         | GK3P           | glycerol kinase 3 pseudogene                                           |                 | -0,666265018 |
| A_23_P10305   | NM_175859         | CTPS2          | CTP synthase II                                                        | ENST00000380207 | -0,666313626 |
| A_23_P101871  | NM_024907         | FBXO17         | F-box protein 17                                                       | ENST00000292852 | -0,666315258 |
| A_24_P102880  | NM_020443         | NAV1           | neuron navigator 1                                                     | ENST00000367296 | -0,666328466 |
| A_23_P362183  | NM_173551         | ANKS6          | ankyrin repeat and sterile alpha motif domain containing 6             | ENST00000540940 | -0,666342304 |
| A_33_P3369029 | NR_033579         | LOC440297      | chondroitin sulfate proteoglycan 4 pseudogene                          | ENST00000456932 | -0,666457674 |
| A_23_P136978  | NM_014467         | SRPX2          | sushi-repeat containing protein, X-linked 2                            | ENST00000373004 | -0,666535551 |
| A_23_P73493   | NM_004344         | CETN2          | centrin, EF-hand protein, 2                                            | ENST00000370277 | -0,666538965 |
| A_23_P134454  | NM_001753         | CAV1           | caveolin 1, caveolae protein, 22kDa                                    | ENST00000341049 | -0,666606444 |
| A_23_P1014    | NR_026761         | LINC00467      | long intergenic non-protein coding RNA 467                             |                 | -0,666628951 |
| A_23_P119778  | NM_020342         | SLC39A10       | solute carrier family 39 (zinc transporter), member 10                 | ENST00000409086 | -0,666631431 |
| A_23_P75741   | NM_198183         | UBE2L6         | ubiquitin-conjugating enzyme E2L 6                                     | ENST00000528275 | -0,666803717 |
| A_23_P105012  | NM_017878         | HRASLS2        | HRAS-like suppressor 2                                                 | ENST00000255695 | -0,666903188 |
| A_23_P62642   | NM_012337         | CCDC19         | coiled-coil domain containing 19                                       | ENST00000475911 | -0,66711903  |

|               |                 |                |                                                           |                 |              |
|---------------|-----------------|----------------|-----------------------------------------------------------|-----------------|--------------|
| A_23_P114466  | NM_033284       | TBL1Y          | transducin (beta)-like 1, Y-linked                        | ENST00000383032 | -0,667132379 |
| A_23_P77043   | NM_024764       | CATSPERB       | cation channel, sperm-associated, beta                    | ENST00000256343 | -0,667226211 |
| A_23_P152284  | NM_024571       | SNRNP25        | small nuclear ribonucleoprotein 25kDa (U11/U12)           | ENST00000466183 | -0,667229762 |
| A_21_P0013462 | ENST00000418309 | XLOC_I2_014077 |                                                           | ENST00000418309 | -0,66728042  |
| A_33_P3350547 | NM_001099404    | SCN5A          | sodium channel, voltage-gated, type V, alpha subunit      | ENST00000333535 | -0,667302619 |
| A_23_P209978  | NM_003385       | VSNL1          | visinin-like 1                                            | ENST00000404666 | -0,667435738 |
| A_32_P73796   | NM_014906       | PPM1E          | protein phosphatase, Mg2+/Mn2+ dependent, 1E              | ENST00000308249 | -0,667625949 |
| A_21_P0006729 | ENST00000449457 | XLOC_008706    |                                                           | ENST00000449457 | -0,667647158 |
| A_24_P923251  | NM_198951       | TGM2           | transglutaminase 2 (C polypeptide, protein-glutamine-gamr | ENST00000468262 | -0,667661927 |
| A_33_P3223923 | NM_005313       | PDIA3          | protein disulfide isomerase family A, member 3            | ENST00000300289 | -0,667839334 |
| A_23_P103511  | NM_001085375    | C1orf226       | chromosome 1 open reading frame 226                       | ENST00000458626 | -0,668003254 |
| A_23_P169003  | NM_022071       | SH2D4A         | SH2 domain containing 4A                                  | ENST00000519207 | -0,668074648 |
| A_23_P43107   | NM_030788       | TM7SF4         | transmembrane 7 superfamily member 4                      | ENST00000297581 | -0,668108028 |
| A_21_P0001036 | ENST00000458683 | XLOC_000497    |                                                           | ENST00000458683 | -0,668179081 |
| A_24_P417596  | NM_138439       | FLYWCH2        | FLYWCH family member 2                                    | ENST00000396958 | -0,668292098 |
| A_23_P71926   | NM_002732       | PRKACG         | protein kinase, cAMP-dependent, catalytic, gamma          | ENST00000377276 | -0,668509222 |
| A_33_P3259198 | NM_182614       | FAM70B         | family with sequence similarity 70, member B              | ENST00000375353 | -0,6690014   |
| A_23_P115645  | NM_001025076    | CELF2          | CUGBP, Elav-like family member 2                          | ENST00000537122 | -0,669098079 |
| A_24_P175187  | NM_017654       | SAMD9          | sterile alpha motif domain containing 9                   | ENST00000379958 | -0,669430318 |
| A_23_P119102  | NM_003370       | VASP           | vasodilator-stimulated phosphoprotein                     | ENST00000245932 | -0,669610306 |
| A_23_P217737  | NM_000052       | ATP7A          | ATPase, Cu++ transporting, alpha polypeptide              | ENST00000341514 | -0,669691509 |
| A_23_P7313    | NM_001040058    | SPP1           | secreted phosphoprotein 1                                 | ENST00000360804 | -0,669901997 |
| A_23_P203957  | NM_175861       | TMTC1          | transmembrane and tetratricopeptide repeat containing 1   | ENST00000319685 | -0,670225547 |
| A_23_P101871  | NM_024907       | FBXO17         | F-box protein 17                                          | ENST00000292852 | -0,670331503 |
| A_21_P0000955 | ENST00000423921 | XLOC_000085    |                                                           | ENST00000423921 | -0,670464969 |
| A_23_P118815  | NM_001012271    | BIRC5          | baculoviral IAP repeat containing 5                       | ENST00000301633 | -0,670614115 |
| A_23_P116264  | NM_006176       | NRGN           | neurogranin (protein kinase C substrate, RC3)             | ENST00000284292 | -0,670614883 |
| A_23_P118246  | NM_016095       | GINS2          | GINS complex subunit 2 (Psf2 homolog)                     | ENST00000253462 | -0,671009029 |
| A_23_P167328  | NM_001775       | CD38           | CD38 molecule                                             | ENST00000540195 | -0,671181775 |



|                |                 |                |                                                                     |                 |              |
|----------------|-----------------|----------------|---------------------------------------------------------------------|-----------------|--------------|
| A_33_P3367550  | NR_033379       | LOC401242      | uncharacterized LOC401242                                           | ENST00000411600 | -0,67139174  |
| A_33_P3381235  | NR_024470       | LOC100127888   | uncharacterized LOC100127888                                        | ENST00000411824 | -0,671393515 |
| A_23_P118815   | NM_001012271    | BIRC5          | baculoviral IAP repeat containing 5                                 | ENST00000301633 | -0,671438927 |
| A_23_P112452   | NR_003191       | GGTA1P         | glycoprotein, alpha-galactosyltransferase 1 pseudogene              | ENST00000373793 | -0,671484799 |
| A_23_P153390   | NM_198492       | CLEC4G         | C-type lectin domain family 4, member G                             | ENST00000328853 | -0,671700848 |
| A_33_P3409139  | NR_015409       | LOC143188      | uncharacterized LOC143188                                           |                 | -0,671760372 |
| A_23_P74278    | NM_001037341    | PDE4B          | phosphodiesterase 4B, cAMP-specific                                 | ENST00000329654 | -0,671770484 |
| A_21_P0014284  | ENST00000551357 | LOC100506452   |                                                                     | ENST00000551357 | -0,67180378  |
| A_23_P118815   | NM_001012271    | BIRC5          | baculoviral IAP repeat containing 5                                 | ENST00000301633 | -0,671820622 |
| A_33_P3413840  | NM_001205019    | GK             | glycerol kinase                                                     | ENST00000378945 | -0,671859082 |
| A_33_P3288110  | NM_001005476    | PKP4           | plakophilin 4                                                       | ENST00000389756 | -0,671891917 |
| A_23_P23074    | NM_006417       | IFI44          | interferon-induced protein 44                                       | ENST00000485662 | -0,672005109 |
| A_24_P66001    | NM_001003684    | UQCR10         | ubiquinol-cytochrome c reductase, complex III subunit X             | ENST00000401406 | -0,672163551 |
| A_23_P139912   | NM_002178       | IGFBP6         | insulin-like growth factor binding protein 6                        | ENST00000548176 | -0,672339602 |
| A_33_P3367899  | NM_005479       | FRAT1          | frequently rearranged in advanced T-cell lymphomas                  | ENST00000371021 | -0,67234944  |
| A_23_P61127    | NM_024122       | APOO           | apolipoprotein O                                                    | ENST00000490078 | -0,672373149 |
| A_23_P19333    | NM_018643       | TREM1          | triggering receptor expressed on myeloid cells 1                    | ENST00000244709 | -0,672457641 |
| A_21_P0010993  | THC2690892      | XLOC_I2_002433 |                                                                     |                 | -0,672565862 |
| A_23_P88331    | NM_014750       | DLGAP5         | discs, large (Drosophila) homolog-associated protein 5              | ENST00000247191 | -0,672657175 |
| A_23_P100386   | NM_152456       | IL34           | interleukin 34                                                      | ENST00000429149 | -0,67284043  |
| A_24_P390060   | NM_138451       | IQCD           | IQ motif containing D                                               | ENST00000416617 | -0,672883939 |
| A_33_P3867584  | NR_038863       | LOC285758      | uncharacterized LOC285758                                           |                 | -0,672944214 |
| A_23_P114466   | NM_033284       | TBL1Y          | transducin (beta)-like 1, Y-linked                                  | ENST00000383032 | -0,672966179 |
| A_33_P3251332  | NM_015473       | HEATR5A        | HEAT repeat containing 5A                                           | ENST00000389961 | -0,673017053 |
| A_24_P314571   | AK075287        | SPC24          | SPC24, NDC80 kinetochore complex component, homolog (S. cerevisiae) |                 | -0,67302561  |
| A_21_P0005990  | BC036850        | XLOC_007438    |                                                                     |                 | -0,673052658 |
| A_33_P3734384  | AK097526        | LOC285957      | uncharacterized LOC285957                                           |                 | -0,673156006 |
| A_19_P00320906 | NR_033846       | LOC283033      | uncharacterized LOC283033                                           |                 | -0,673174322 |
| A_23_P108823   | NM_032523       | OSBPL6         | oxysterol binding protein-like 6                                    | ENST00000315022 | -0,673684653 |

|                |                 |                |                                                               |                 |              |
|----------------|-----------------|----------------|---------------------------------------------------------------|-----------------|--------------|
| A_24_P155617   | NM_172370       | DAOA           | D-amino acid oxidase activator                                | ENST00000473269 | -0,673698554 |
| A_19_P00321148 | AK055877        | LOC100506328   | uncharacterized LOC100506328                                  |                 | -0,673996467 |
| A_21_P0012782  | ENST00000506972 | XLOC_I2_011204 |                                                               | ENST00000506972 | -0,674173361 |
| A_32_P176911   | NR_026774       | LINC00239      | long intergenic non-protein coding RNA 239                    | ENST00000556973 | -0,674321093 |
| A_33_P3248429  | ENST00000366796 | DACT2          | dapper, antagonist of beta-catenin, homolog 2 (Xenopus lae    | ENST00000366796 | -0,674367621 |
| A_33_P3224249  | NM_172239       | REXO1L1        | REX1, RNA exonuclease 1 homolog (S. cerevisiae)-like 1        | ENST00000425429 | -0,674519683 |
| A_23_P113393   | NM_017413       | APLN           | apelin                                                        | ENST00000307484 | -0,674534586 |
| A_23_P112452   | NR_003191       | GGTA1P         | glycoprotein, alpha-galactosyltransferase 1 pseudogene        | ENST00000373793 | -0,67499205  |
| A_23_P119102   | NM_003370       | VASP           | vasodilator-stimulated phosphoprotein                         | ENST00000245932 | -0,67506398  |
| A_23_P217917   | NM_147148       | GSTM4          | glutathione S-transferase mu 4                                | ENST00000493171 | -0,675288866 |
| A_23_P109171   | NM_001195       | BFSP1          | beaded filament structural protein 1, filensin                | ENST00000536626 | -0,675698084 |
| A_23_P430411   | ENST00000545414 | ITGB2          | integrin, beta 2 (complement component 3 receptor 3 and       | ENST00000545414 | -0,675809973 |
| A_23_P54469    | NM_145805       | ISL2           | ISL LIM homeobox 2                                            | ENST00000290759 | -0,675817945 |
| A_23_P112452   | NR_003191       | GGTA1P         | glycoprotein, alpha-galactosyltransferase 1 pseudogene        | ENST00000373793 | -0,67582251  |
| A_23_P74359    | NM_004078       | CSRP1          | cysteine and glycine-rich protein 1                           | ENST00000340006 | -0,675847757 |
| A_21_P0005811  | TCONS_00014957  | XLOC_007036    |                                                               |                 | -0,676542889 |
| A_21_P0005321  | ENST00000451953 | XLOC_006548    |                                                               | ENST00000451953 | -0,676848081 |
| A_23_P42353    | NM_016135       | ETV7           | ets variant 7                                                 | ENST00000339796 | -0,677010261 |
| A_23_P205531   | NM_002937       | RNASE4         | ribonuclease, RNase A family, 4                               | ENST00000397995 | -0,677132221 |
| A_33_P3605529  | NR_033984       | LOC400548      | uncharacterized LOC400548                                     |                 | -0,677167726 |
| A_33_P3394972  | NM_020896       | OSBPL5         | oxysterol binding protein-like 5                              | ENST00000357352 | -0,677192881 |
| A_23_P111995   | NM_002318       | LOXL2          | lysyl oxidase-like 2                                          | ENST00000389131 | -0,677264378 |
| A_21_P0002531  | TCONS_00004544  | XLOC_002452    |                                                               |                 | -0,677318601 |
| A_23_P44942    | NM_025004       | CCDC15         | coiled-coil domain containing 15                              | ENST00000531167 | -0,67733365  |
| A_23_P101319   | NM_152354       | ZNF285         | zinc finger protein 285                                       | ENST00000544719 | -0,67745718  |
| A_23_P252740   | NM_024094       | DSCC1          | defective in sister chromatid cohesion 1 homolog (S. cerevisi | ENST00000313655 | -0,677968427 |
| A_33_P3240787  | XR_108893       | LOC100131910   | uncharacterized LOC100131910                                  |                 | -0,67797569  |
| A_21_P0013957  | XM_003118523    | LOC100131035   | uncharacterized LOC100131035                                  |                 | -0,67829787  |
| A_23_P217428   | NM_013427       | ARHGAP6        | Rho GTPase activating protein 6                               | ENST00000489330 | -0,678332174 |

|               |                  |                |                                                            |                 |              |
|---------------|------------------|----------------|------------------------------------------------------------|-----------------|--------------|
| A_33_P3414912 | NM_001200056     | NPL            | N-acetylneuraminase pyruvate lyase (dihydrodipicolinate sy | ENST00000258317 | -0,67833384  |
| A_23_P138776  | NM_001610        | ACP2           | acid phosphatase 2, lysosomal                              | ENST00000525230 | -0,678342312 |
| A_23_P156739  | NM_032340        | C6orf125       | chromosome 6 open reading frame 125                        | ENST00000374231 | -0,678405925 |
| A_21_P0004439 | TCONS_00010463   | XLOC_004984    |                                                            |                 | -0,67847769  |
| A_21_P0012851 | TCONS_I2_0002255 | XLOC_I2_011793 |                                                            |                 | -0,678587668 |
| A_21_P0014570 | ENST00000547027  | LOC100505814   |                                                            | ENST00000547027 | -0,678595022 |
| A_21_P0007546 | ENST00000551021  | XLOC_009723    |                                                            | ENST00000551021 | -0,678698648 |
| A_23_P7313    | NM_001040058     | SPP1           | secreted phosphoprotein 1                                  | ENST00000360804 | -0,678747098 |
| A_33_P3345210 | NM_001164407     | TLCD2          | TLC domain containing 2                                    | ENST00000330676 | -0,678870714 |
| A_33_P3215739 | NM_001085451     | LNP1           | leukemia NUP98 fusion partner 1                            | ENST00000383693 | -0,678985844 |
| A_23_P80032   | NM_005225        | E2F1           | E2F transcription factor 1                                 | ENST00000343380 | -0,67899512  |
| A_32_P18440   | NM_032199        | ARID5B         | AT rich interactive domain 5B (MRF1-like)                  | ENST00000279873 | -0,679114924 |
| A_33_P3358824 | NM_000302        | PLOD1          | procollagen-lysine, 2-oxoglutarate 5-dioxygenase 1         | ENST00000358133 | -0,679171377 |
| A_23_P137984  | NM_002966        | S100A10        | S100 calcium binding protein A10                           | ENST00000368809 | -0,679385745 |
| A_24_P331560  | NM_000351        | STS            | steroid sulfatase (microsomal), isozyme S                  | ENST00000217961 | -0,679401662 |
| A_23_P11841   | NM_001684        | ATP2B4         | ATPase, Ca <sup>++</sup> transporting, plasma membrane 4   | ENST00000341360 | -0,679515587 |
| A_33_P3351120 | NM_003330        | TXNRD1         | thioredoxin reductase 1                                    | ENST00000378070 | -0,679524857 |
| A_23_P129801  | NM_006822        | RAB40B         | RAB40B, member RAS oncogene family                         | ENST00000269347 | -0,67965085  |
| A_33_P3267799 | NM_006847        | LILRB4         | leukocyte immunoglobulin-like receptor, subfamily B (with  | ENST00000270452 | -0,679801641 |
| A_23_P7313    | NM_001040058     | SPP1           | secreted phosphoprotein 1                                  | ENST00000360804 | -0,680085257 |
| A_23_P30603   | NM_003649        | DDO            | D-aspartate oxidase                                        | ENST00000368924 | -0,680099156 |
| A_23_P125082  | NM_002199        | IRF2           | interferon regulatory factor 2                             | ENST00000393593 | -0,680100053 |
| A_23_P104876  | NM_017425        | SPA17          | sperm autoantigenic protein 17                             | ENST00000524614 | -0,680275212 |
| A_33_P3292402 | ENST00000468759  | LRRIQ3         | leucine-rich repeats and IQ motif containing 3             | ENST00000468759 | -0,680667578 |
| A_23_P120467  | NM_199427        | ZFP64          | zinc finger protein 64 homolog (mouse)                     | ENST00000361387 | -0,680752473 |
| A_23_P91697   | NM_004737        | LARGE          | like-glycosyltransferase                                   | ENST00000402320 | -0,680773081 |
| A_32_P342064  | NM_002032        | FTH1           | ferritin, heavy polypeptide 1                              | ENST00000534180 | -0,680917665 |
| A_23_P210425  | NM_181526        | MYL9           | myosin, light chain 9, regulatory                          | ENST00000279022 | -0,681064409 |
| A_33_P3357535 | NM_030579        | CYB5B          | cytochrome b5 type B (outer mitochondrial membrane)        | ENST00000307892 | -0,681331987 |

|               |                 |                |                                                           |                 |              |
|---------------|-----------------|----------------|-----------------------------------------------------------|-----------------|--------------|
| A_24_P22050   | NM_017817       | RAB20          | RAB20, member RAS oncogene family                         | ENST00000267328 | -0,681451108 |
| A_23_P113393  | NM_017413       | APLN           | apelin                                                    | ENST00000307484 | -0,681586036 |
| A_23_P122077  | NM_016591       | GCNT4          | glucosaminyl (N-acetyl) transferase 4, core 2             | ENST00000322348 | -0,681639939 |
| A_32_P8221    | NM_000845       | GRM8           | glutamate receptor, metabotropic 8                        | ENST00000489939 | -0,681652832 |
| A_24_P937306  | ENST00000380291 | AP1S2          | adaptor-related protein complex 1, sigma 2 subunit        | ENST00000380291 | -0,6822539   |
| A_23_P31453   | NM_012449       | STEAP1         | six transmembrane epithelial antigen of the prostate 1    | ENST00000297205 | -0,682272779 |
| A_33_P3300297 | ENST00000409763 | FAM126A        | family with sequence similarity 126, member A             | ENST00000409763 | -0,682567155 |
| A_23_P7313    | NM_001040058    | SPP1           | secreted phosphoprotein 1                                 | ENST00000360804 | -0,682642015 |
| A_23_P344555  | NM_006403       | NEDD9          | neural precursor cell expressed, developmentally down-reg | ENST00000448183 | -0,682753652 |
| A_33_P3214745 | NM_001024680    | FBXO48         | F-box protein 48                                          | ENST00000377957 | -0,683133799 |
| A_23_P101871  | NM_024907       | FBXO17         | F-box protein 17                                          | ENST00000292852 | -0,683491287 |
| A_23_P118815  | NM_001012271    | BIRC5          | baculoviral IAP repeat containing 5                       | ENST00000301633 | -0,683722287 |
| A_23_P352266  | NM_000633       | BCL2           | B-cell CLL/lymphoma 2                                     | ENST00000398117 | -0,683786325 |
| A_33_P3341841 | NM_001004312    | RTP2           | receptor (chemosensory) transporter protein 2             | ENST00000358241 | -0,683835781 |
| A_23_P103486  | NM_000775       | CYP2J2         | cytochrome P450, family 2, subfamily J, polypeptide 2     | ENST00000469406 | -0,683858246 |
| A_23_P118815  | NM_001012271    | BIRC5          | baculoviral IAP repeat containing 5                       | ENST00000301633 | -0,683869441 |
| A_21_P0013549 | ENST00000427722 | XLOC_I2_014694 |                                                           | ENST00000427722 | -0,683960282 |
| A_21_P0012840 | W69253          | XLOC_I2_011692 |                                                           |                 | -0,684692166 |
| A_23_P119778  | NM_020342       | SLC39A10       | solute carrier family 39 (zinc transporter), member 10    | ENST00000409086 | -0,684736498 |
| A_21_P0003130 | TCONS_00006544  | XLOC_003164    |                                                           |                 | -0,684995822 |
| A_23_P111995  | NM_002318       | LOXL2          | lysyl oxidase-like 2                                      | ENST00000389131 | -0,685557588 |
| A_23_P216501  | NM_213674       | TPM2           | tropomyosin 2 (beta)                                      | ENST00000329305 | -0,685585995 |
| A_23_P348383  | NM_001080522    | CC2D2A         | coiled-coil and C2 domain containing 2A                   | ENST00000510333 | -0,685686291 |
| A_23_P80032   | NM_005225       | E2F1           | E2F transcription factor 1                                | ENST00000343380 | -0,685795375 |
| A_23_P127288  | NM_000417       | IL2RA          | interleukin 2 receptor, alpha                             | ENST00000379954 | -0,685843241 |
| A_23_P164057  | NM_002404       | MFAP4          | microfibrillar-associated protein 4                       | ENST00000395592 | -0,686012802 |
| A_23_P19369   | NM_017640       | LRRC16A        | leucine rich repeat containing 16A                        | ENST00000399313 | -0,686308616 |
| A_23_P11841   | NM_001684       | ATP2B4         | ATPase, Ca <sup>++</sup> transporting, plasma membrane 4  | ENST00000341360 | -0,686357844 |
| A_24_P267592  | NM_015474       | SAMHD1         | SAM domain and HD domain 1                                | ENST00000262878 | -0,68645341  |

|               |                 |              |                                                                  |                 |              |
|---------------|-----------------|--------------|------------------------------------------------------------------|-----------------|--------------|
| A_23_P126278  | NM_003465       | CHIT1        | chitinase 1 (chitotriosidase)                                    | ENST00000484834 | -0,686510774 |
| A_23_P7313    | NM_001040058    | SPP1         | secreted phosphoprotein 1                                        | ENST00000360804 | -0,686656053 |
| A_23_P7313    | NM_001040058    | SPP1         | secreted phosphoprotein 1                                        | ENST00000360804 | -0,686720595 |
| A_33_P3340655 | NM_052904       | KLHL32       | kelch-like 32 (Drosophila)                                       | ENST00000369255 | -0,686855935 |
| A_23_P337155  | NM_001082968    | TOM1L2       | target of myb1-like 2 (chicken)                                  | ENST00000395739 | -0,686883533 |
| A_24_P353638  | NM_021181       | SLAMF7       | SLAM family member 7                                             | ENST00000466792 | -0,686928564 |
| A_24_P344711  | NM_020132       | AGPAT3       | 1-acylglycerol-3-phosphate O-acyltransferase 3                   | ENST00000398058 | -0,687038358 |
| A_23_P109171  | NM_001195       | BFSP1        | beaded filament structural protein 1, filensin                   | ENST00000536626 | -0,68705977  |
| A_23_P154358  | NM_144707       | PROM2        | prominin 2                                                       | ENST00000487138 | -0,687107859 |
| A_24_P20383   | NM_005718       | ARPC4        | actin related protein 2/3 complex, subunit 4, 20kDa              | ENST00000485273 | -0,687147368 |
| A_24_P95439   | NM_001014437    | CARS         | cysteinyl-tRNA synthetase                                        | ENST00000397114 | -0,687231676 |
| A_33_P3289034 | NM_016112       | PKD2L1       | polycystic kidney disease 2-like 1                               | ENST00000353274 | -0,687413234 |
| A_23_P118815  | NM_001012271    | BIRC5        | baculoviral IAP repeat containing 5                              | ENST00000301633 | -0,687489421 |
| A_23_P122077  | NM_016591       | GCNT4        | glucosaminyl (N-acetyl) transferase 4, core 2                    | ENST00000322348 | -0,687757394 |
| A_23_P252740  | NM_024094       | DSCC1        | defective in sister chromatid cohesion 1 homolog (S. cerevisiae) | ENST00000313655 | -0,68804351  |
| A_23_P55477   | NM_000676       | ADORA2B      | adenosine A2b receptor                                           | ENST00000304222 | -0,688159215 |
| A_23_P7313    | NM_001040058    | SPP1         | secreted phosphoprotein 1                                        | ENST00000360804 | -0,688187235 |
| A_21_P0007547 | TCONS_00020392  | XLOC_009723  |                                                                  |                 | -0,688238318 |
| A_33_P3329023 | NM_001252273    | FAM69A       | family with sequence similarity 69, member A                     | ENST00000401027 | -0,688271253 |
| A_23_P151159  | NM_032300       | TCHP         | trichoplein, keratin filament binding                            | ENST00000312777 | -0,688407665 |
| A_24_P402588  | NM_018014       | BCL11A       | B-cell CLL/lymphoma 11A (zinc finger protein)                    | ENST00000489516 | -0,68877104  |
| A_23_P7313    | NM_001040058    | SPP1         | secreted phosphoprotein 1                                        | ENST00000360804 | -0,689567942 |
| A_24_P915806  | NM_001024074    | HNMT         | histamine N-methyltransferase                                    | ENST00000280096 | -0,689909125 |
| A_21_P0014721 | ENST00000514732 | LOC100506564 |                                                                  | ENST00000514732 | -0,6899664   |
| A_23_P119102  | NM_003370       | VASP         | vasodilator-stimulated phosphoprotein                            | ENST00000245932 | -0,690210052 |
| A_23_P71530   | NM_002546       | TNFRSF11B    | tumor necrosis factor receptor superfamily, member 11b           | ENST00000521597 | -0,690223819 |
| A_23_P110212  | NM_001995       | ACSL1        | acyl-CoA synthetase long-chain family member 1                   | ENST00000281455 | -0,690533863 |
| A_24_P233488  | NM_002309       | LIF          | leukemia inhibitory factor (cholinergic differentiation factor)  | ENST00000249075 | -0,690605408 |
| A_23_P99906   | NM_199330       | HOMER2       | homer homolog 2 (Drosophila)                                     | ENST00000304231 | -0,690809124 |



|                |                                 |                |                                                                |                 |  |              |
|----------------|---------------------------------|----------------|----------------------------------------------------------------|-----------------|--|--------------|
| A_21_P0012703  | TCONS_I2_0002148:XLOC_I2_011415 |                |                                                                |                 |  | -0,691031797 |
| A_23_P118      | NM_001439                       | EXTL2          | exostoses (multiple)-like 2                                    | ENST00000370114 |  | -0,691478459 |
| A_21_P0011693  | BC041478                        | XLOC_I2_006718 |                                                                |                 |  | -0,691498575 |
| A_24_P149902   | NM_016169                       | SUFU           | suppressor of fused homolog (Drosophila)                       | ENST00000471000 |  | -0,691647381 |
| A_33_P3372004  | NM_005849                       | IGSF6          | immunoglobulin superfamily, member 6                           | ENST00000268389 |  | -0,69172433  |
| A_24_P228875   | NM_004840                       | ARHGEF6        | Rac/Cdc42 guanine nucleotide exchange factor (GEF) 6           | ENST00000535736 |  | -0,691870747 |
| A_24_P365526   | NM_002110                       | HCK            | hemopoietic cell kinase                                        | ENST00000375862 |  | -0,691903225 |
| A_23_P10647    | NM_018659                       | CYTL1          | cytokine-like 1                                                | ENST00000307746 |  | -0,691933135 |
| A_33_P3638471  | BC027954                        | TRGV7          | T cell receptor gamma variable 7 (pseudogene)                  |                 |  | -0,691994949 |
| A_19_P00320469 | NR_015375                       | FLJ35024       | uncharacterized LOC401491                                      |                 |  | -0,692107905 |
| A_23_P80032    | NM_005225                       | E2F1           | E2F transcription factor 1                                     | ENST00000343380 |  | -0,69257526  |
| A_23_P84189    | NM_181671                       | PITPNC1        | phosphatidylinositol transfer protein, cytoplasmic 1           | ENST00000299954 |  | -0,692641694 |
| A_19_P00322310 | NR_038303                       | LOC100505702   | uncharacterized LOC100505702                                   |                 |  | -0,692666072 |
| A_24_P339560   | NM_052884                       | SIGLEC11       | sialic acid binding Ig-like lectin 11                          | ENST00000426296 |  | -0,692828067 |
| A_24_P346431   | NM_022748                       | TNS3           | tensin 3                                                       | ENST00000398879 |  | -0,692864079 |
| A_23_P58321    | NM_001237                       | CCNA2          | cyclin A2                                                      | ENST00000274026 |  | -0,692875569 |
| A_23_P118815   | NM_001012271                    | BIRC5          | baculoviral IAP repeat containing 5                            | ENST00000301633 |  | -0,692967591 |
| A_33_P3315263  | NM_175834                       | KRT79          | keratin 79                                                     | ENST00000330553 |  | -0,693050705 |
| A_19_P00318461 | ENST00000366424                 | XLOC_001942    |                                                                | ENST00000366424 |  | -0,693052179 |
| A_23_P206359   | NM_004360                       | CDH1           | cadherin 1, type 1, E-cadherin (epithelial)                    | ENST00000261769 |  | -0,693404501 |
| A_32_P119197   | NM_001043352                    | TPM3           | tropomyosin 3                                                  | ENST00000368533 |  | -0,693419764 |
| A_23_P251705   | NM_015185                       | ARHGEF9        | Cdc42 guanine nucleotide exchange factor (GEF) 9               | ENST00000374872 |  | -0,693461563 |
| A_19_P00322118 | NR_037875                       | LOC728730      | uncharacterized LOC728730                                      | ENST00000422128 |  | -0,693597959 |
| A_33_P3281795  | NM_007283                       | MGLL           | monoglyceride lipase                                           | ENST00000265052 |  | -0,694431967 |
| A_33_P3310301  | NM_182728                       | SLC7A8         | solute carrier family 7 (amino acid transporter light chain, L | ENST00000206514 |  | -0,6949563   |
| A_32_P111306   | NR_027072                       | LINC00189      | long intergenic non-protein coding RNA 189                     | ENST00000431661 |  | -0,695073528 |
| A_23_P216610   | NM_022486                       | SUSD1          | sushi domain containing 1                                      | ENST00000374270 |  | -0,695270756 |
| A_24_P618401   | NR_034121                       | LOC100131067   | uncharacterized LOC100131067                                   | ENST00000501927 |  | -0,69551334  |
| A_23_P394064   | NM_012232                       | PTRF           | polymerase I and transcript release factor                     | ENST00000357037 |  | -0,695747244 |

|               |                 |                |                                                                                     |                 |              |
|---------------|-----------------|----------------|-------------------------------------------------------------------------------------|-----------------|--------------|
| A_32_P345659  | NM_194293       | XIRP1          | xin actin-binding repeat containing 1                                               | ENST00000421646 | -0,695841497 |
| A_23_P207400  | NM_007300       | BRCA1          | breast cancer 1, early onset                                                        | ENST00000412061 | -0,696092706 |
| A_24_P269551  | NM_173519       | CLVS1          | clavesin 1                                                                          | ENST00000519846 | -0,696143806 |
| A_33_P3273474 | NM_001765       | CD1C           | CD1c molecule                                                                       | ENST00000368169 | -0,696410585 |
| A_33_P3304576 | NM_001001480    | KRTAP5-5       | keratin associated protein 5-5                                                      | ENST00000422553 | -0,696714854 |
| A_23_P80032   | NM_005225       | E2F1           | E2F transcription factor 1                                                          | ENST00000343380 | -0,696908484 |
| A_23_P27584   | NM_001020818    | MYADM          | myeloid-associated differentiation marker                                           | ENST00000391771 | -0,696999114 |
| A_33_P3370094 | NM_007289       | MME            | membrane metallo-endoropeptidase                                                    | ENST00000360490 | -0,697104146 |
| A_33_P3333810 | NM_003350       | UBE2V2         | ubiquitin-conjugating enzyme E2 variant 2                                           | ENST00000523111 | -0,697156783 |
| A_24_P158089  | NM_000602       | SERPINE1       | serpin peptidase inhibitor, clade E (nexin, plasminogen activator inhibitor type 1) | ENST00000445463 | -0,697329086 |
| A_33_P3344039 | NM_007082       | RABL2A         | RAB, member of RAS oncogene family-like 2A                                          | ENST00000462095 | -0,69745749  |
| A_24_P398691  | NM_032859       | ABHD13         | abhydrolase domain containing 13                                                    | ENST00000375898 | -0,697548187 |
| A_23_P305245  | NM_001168214    | C3orf80        | chromosome 3 open reading frame 80                                                  | ENST00000326474 | -0,697715573 |
| A_24_P320033  | NM_005191       | CD80           | CD80 molecule                                                                       | ENST00000264246 | -0,697761704 |
| A_23_P113393  | NM_017413       | APLN           | apelin                                                                              | ENST00000307484 | -0,698022214 |
| A_23_P58321   | NM_001237       | CCNA2          | cyclin A2                                                                           | ENST00000274026 | -0,698065631 |
| A_23_P207400  | NM_007300       | BRCA1          | breast cancer 1, early onset                                                        | ENST00000412061 | -0,698068399 |
| A_21_P0005433 | TCONS_00013599  | XLOC_006253    |                                                                                     |                 | -0,69819801  |
| A_24_P630490  | NM_001042702    | DFNB59         | deafness, autosomal recessive 59                                                    | ENST00000375129 | -0,698226213 |
| A_23_P155848  | NM_014421       | DKK2           | dickkopf 2 homolog (Xenopus laevis)                                                 | ENST00000285311 | -0,698370322 |
| A_21_P0011200 | ENST00000435725 | XLOC_l2_003652 |                                                                                     | ENST00000435725 | -0,698625293 |
| A_24_P45446   | NM_052941       | GBP4           | guanylate binding protein 4                                                         | ENST00000471938 | -0,698686571 |
| A_23_P110184  | NM_006745       | MSMO1          | methylsterol monooxygenase 1                                                        | ENST00000393766 | -0,698686577 |
| A_23_P7313    | NM_001040058    | SPP1           | secreted phosphoprotein 1                                                           | ENST00000360804 | -0,698759881 |
| A_23_P119102  | NM_003370       | VASP           | vasodilator-stimulated phosphoprotein                                               | ENST00000245932 | -0,698950427 |
| A_21_P0001626 | ENST00000420762 | XLOC_001209    |                                                                                     | ENST00000420762 | -0,699203617 |
| A_24_P189997  | NM_138322       | PCSK6          | proprotein convertase subtilisin/kexin type 6                                       | ENST00000331826 | -0,699567335 |
| A_24_P334718  | NM_181791       | GPR141         | G protein-coupled receptor 141                                                      | ENST00000334425 | -0,699637731 |
| A_23_P110212  | NM_001995       | ACSL1          | acyl-CoA synthetase long-chain family member 1                                      | ENST00000281455 | -0,699834126 |

|               |                 |                |                                                              |                 |              |
|---------------|-----------------|----------------|--------------------------------------------------------------|-----------------|--------------|
| A_23_P134419  | NM_007155       | ZP3            | zona pellucida glycoprotein 3 (sperm receptor)               | ENST00000544121 | -0,699841661 |
| A_33_P3389678 | NM_001077238    | SPPL2B         | signal peptide peptidase-like 2B                             | ENST00000452401 | -0,699843626 |
| A_32_P66881   | NM_138554       | TLR4           | toll-like receptor 4                                         |                 | -0,699857165 |
| A_33_P3319870 | NM_001191323    | GREM1          | gremlin 1                                                    | ENST00000322805 | -0,699873261 |
| A_23_P166297  | NM_207627       | ABCG1          | ATP-binding cassette, sub-family G (WHITE), member 1         | ENST00000340588 | -0,699927929 |
| A_23_P80032   | NM_005225       | E2F1           | E2F transcription factor 1                                   | ENST00000343380 | -0,699932393 |
| A_33_P3338733 | NM_198159       | MITF           | microphthalmia-associated transcription factor               | ENST00000394351 | -0,70028249  |
| A_23_P111888  | NM_138455       | CTHRC1         | collagen triple helix repeat containing 1                    | ENST00000297577 | -0,70028655  |
| A_23_P354591  | NM_033446       | FAM125B        | family with sequence similarity 125, member B                | ENST00000361171 | -0,700475606 |
| A_23_P119778  | NM_020342       | SLC39A10       | solute carrier family 39 (zinc transporter), member 10       | ENST00000409086 | -0,700558121 |
| A_23_P31996   | NM_033051       | SLC46A2        | solute carrier family 46, member 2                           | ENST00000374228 | -0,700680022 |
| A_24_P98047   | NM_018593       | SLC16A10       | solute carrier family 16, member 10 (aromatic amino acid tr  | ENST00000368851 | -0,700850525 |
| A_23_P70719   | NM_000426       | LAMA2          | laminin, alpha 2                                             | ENST00000443169 | -0,700896369 |
| A_23_P19352   | NM_006586       | CNPY3          | canopy 3 homolog (zebrafish)                                 | ENST00000394142 | -0,700900949 |
| A_32_P72394   | NM_002735       | PRKAR1B        | protein kinase, cAMP-dependent, regulatory, type I, beta     | ENST00000417852 | -0,700962281 |
| A_33_P3251896 | NM_004307       | APBB2          | amyloid beta (A4) precursor protein-binding, family B, mem   | ENST00000316212 | -0,701044743 |
| A_32_P352743  | NM_001004440    | FAM19A3        | family with sequence similarity 19 (chemokine (C-C motif)-li | ENST00000369630 | -0,70111043  |
| A_23_P344568  | NM_145019       | FAM124A        | family with sequence similarity 124A                         | ENST00000280057 | -0,701376966 |
| A_24_P945228  | NM_207352       | CYP4V2         | cytochrome P450, family 4, subfamily V, polypeptide 2        | ENST00000507209 | -0,701551763 |
| A_23_P119102  | NM_003370       | VASP           | vasodilator-stimulated phosphoprotein                        | ENST00000245932 | -0,701688137 |
| A_23_P150768  | NM_007256       | SLCO2B1        | solute carrier organic anion transporter family, member 2B:  | ENST00000524599 | -0,702008487 |
| A_33_P3492087 | AK097198        | LOC284191      | uncharacterized LOC284191                                    |                 | -0,702182159 |
| A_24_P367496  | AK124894        | LOC100131650   | uncharacterized LOC100131650                                 |                 | -0,702306184 |
| A_21_P0013868 | THC2686626      | XLOC_I2_015804 |                                                              |                 | -0,702377295 |
| A_23_P126416  | NM_005424       | TIE1           | tyrosine kinase with immunoglobulin-like and EGF-like dom    | ENST00000433781 | -0,702726153 |
| A_23_P71530   | NM_002546       | TNFRSF11B      | tumor necrosis factor receptor superfamily, member 11b       | ENST00000521597 | -0,702770609 |
| A_21_P0014404 | ENST00000422459 | LOC100506115   |                                                              | ENST00000422459 | -0,702869252 |
| A_23_P63158   | NM_003126       | SPTA1          | spectrin, alpha, erythrocytic 1 (elliptocytosis 2)           | ENST00000368147 | -0,703030837 |
| A_23_P110212  | NM_001995       | ACSL1          | acyl-CoA synthetase long-chain family member 1               | ENST00000281455 | -0,703097697 |

|               |                 |              |                                                              |                 |              |
|---------------|-----------------|--------------|--------------------------------------------------------------|-----------------|--------------|
| A_33_P3339961 | NM_178547       | ZBTB80S      | zinc finger and BTB domain containing 8 opposite strand      | ENST00000373506 | -0,703264091 |
| A_33_P3362296 | ENST00000396017 | KCNG1        | potassium voltage-gated channel, subfamily G, member 1       | ENST00000396017 | -0,703390404 |
| A_23_P389102  | NM_015194       | MYO1D        | myosin ID                                                    | ENST00000318217 | -0,703428087 |
| A_21_P0001925 | ENST00000437118 | XLOC_001704  |                                                              | ENST00000437118 | -0,703582201 |
| A_23_P33154   | NM_014393       | STAU2        | stau2, RNA binding protein, homolog 2 (Drosophila)           | ENST00000355780 | -0,7037733   |
| A_33_P3403075 | NM_018304       | PRR11        | proline rich 11                                              | ENST00000262293 | -0,703970144 |
| A_24_P419132  | NM_006733       | CENPI        | centromere protein I                                         | ENST00000372926 | -0,704070971 |
| A_24_P106357  | NM_139281       | WDR36        | WD repeat domain 36                                          | ENST00000506538 | -0,704386595 |
| A_23_P416034  | NM_017518       | HAUS7        | HAUS augmin-like complex, subunit 7                          | ENST00000472228 | -0,704655423 |
| A_33_P3336422 | NR_034137       | LOC729013    | uncharacterized LOC729013                                    |                 | -0,704659546 |
| A_23_P10647   | NM_018659       | CYTL1        | cytokine-like 1                                              | ENST00000307746 | -0,704795984 |
| A_33_P3307049 | AK128478        | LOC100129363 | uncharacterized LOC100129363                                 |                 | -0,704833969 |
| A_23_P110212  | NM_001995       | ACSL1        | acyl-CoA synthetase long-chain family member 1               | ENST00000281455 | -0,704869041 |
| A_33_P3230881 | NM_032834       | ALG10        | asparagine-linked glycosylation 10, alpha-1,2-glucosyltransf | ENST00000308742 | -0,704910252 |
| A_23_P333218  | NM_001031711    | ERGIC1       | endoplasmic reticulum-golgi intermediate compartment (ER     | ENST00000523215 | -0,704950098 |
| A_21_P0000160 | NM_138461       | TM4SF19      | transmembrane 4 L six family member 19                       | ENST00000273695 | -0,705171361 |
| A_23_P346006  | NM_020739       | CCPG1        | cell cycle progression 1                                     | ENST00000425574 | -0,705189621 |
| A_21_P0014363 | XR_109462       | LOC100505577 | uncharacterized LOC100505577                                 |                 | -0,705265362 |
| A_23_P92334   | NM_024943       | TMEM156      | transmembrane protein 156                                    | ENST00000381938 | -0,705377369 |
| A_23_P99452   | NM_000059       | BRCA2        | breast cancer 2, early onset                                 | ENST00000380152 | -0,70540896  |
| A_23_P111995  | NM_002318       | LOXL2        | lysyl oxidase-like 2                                         | ENST00000389131 | -0,705503002 |
| A_21_P0010137 | NR_033840       | LINC00163    | long intergenic non-protein coding RNA 163                   | ENST00000434081 | -0,705718163 |
| A_23_P83751   | NM_024806       | C11orf63     | chromosome 11 open reading frame 63                          | ENST00000227349 | -0,705801101 |
| A_24_P941866  | AK096941        | C5orf56      | chromosome 5 open reading frame 56                           | ENST00000337752 | -0,705870307 |
| A_23_P69310   | NM_003965       | CCRL2        | chemokine (C-C motif) receptor-like 2                        | ENST00000400882 | -0,706110049 |
| A_23_P1492    | NM_021732       | AVPI1        | arginine vasopressin-induced 1                               | ENST00000370626 | -0,706261922 |
| A_33_P3359368 | NM_001082488    | DHRS4L1      | dehydrogenase/reductase (SDR family) member 4 like 1         | ENST00000397065 | -0,706286425 |
| A_33_P3286146 | NR_033652       | LOC100132891 | uncharacterized LOC100132891                                 | ENST00000457356 | -0,70642903  |
| A_23_P119102  | NM_003370       | VASP         | vasodilator-stimulated phosphoprotein                        | ENST00000245932 | -0,70650076  |

|                |                 |              |                                                               |                 |              |
|----------------|-----------------|--------------|---------------------------------------------------------------|-----------------|--------------|
| A_24_P211797   | NM_178231       | ICA1L        | islet cell autoantigen 1,69kDa-like                           | ENST00000411681 | -0,706506717 |
| A_23_P74290    | NM_052942       | GBP5         | guanylate binding protein 5                                   | ENST00000490568 | -0,706628347 |
| A_23_P110791   | NM_005211       | CSF1R        | colony stimulating factor 1 receptor                          | ENST00000286301 | -0,706690021 |
| A_24_P331830   | NM_015209       | KAZN         | kazrin, periplakin interacting protein                        | ENST00000376028 | -0,706711321 |
| A_23_P381714   | NM_198584       | CA13         | carbonic anhydrase XIII                                       | ENST00000321764 | -0,706836945 |
| A_33_P3238415  | NM_001080554    | GSG1         | germ cell associated 1                                        | ENST00000405543 | -0,706882551 |
| A_23_P151166   | NM_001040107    | HVCN1        | hydrogen voltage-gated channel 1                              | ENST00000356742 | -0,707247069 |
| A_24_P64167    | NM_000962       | PTGS1        | prostaglandin-endoperoxide synthase 1 (prostaglandin G/H      | ENST00000362012 | -0,707345521 |
| A_23_P122724   | NM_004665       | VNN2         | vanin 2                                                       | ENST00000392389 | -0,707505373 |
| A_23_P7313     | NM_001040058    | SPP1         | secreted phosphoprotein 1                                     | ENST00000360804 | -0,707574878 |
| A_23_P113393   | NM_017413       | APLN         | apelin                                                        | ENST00000307484 | -0,707628484 |
| A_23_P90626    | NM_004288       | CYTIP        | cytohesin 1 interacting protein                               | ENST00000540637 | -0,707802064 |
| A_23_P76983    | NM_025057       | C14orf45     | chromosome 14 open reading frame 45                           | ENST00000394009 | -0,707843229 |
| A_19_P00804215 | NM_001145710    | LOC375190    | UPF0638 protein B                                             | ENST00000420135 | -0,707847725 |
| A_32_P75264    | NM_178505       | TMEM26       | transmembrane protein 26                                      | ENST00000399298 | -0,707912868 |
| A_33_P3363799  | NM_001242607    | NCAM1        | neural cell adhesion molecule 1                               | ENST00000316851 | -0,707920969 |
| A_21_P0014116  | ENST00000503006 | LOC100507134 |                                                               | ENST00000503006 | -0,708340595 |
| A_33_P3232965  | NM_001010870    | TDRD6        | tudor domain containing 6                                     | ENST00000316081 | -0,708869089 |
| A_21_P0004809  | ENST00000433388 | XLOC_005938  |                                                               | ENST00000433388 | -0,708901535 |
| A_23_P101871   | NM_024907       | FBXO17       | F-box protein 17                                              | ENST00000292852 | -0,709123098 |
| A_24_P158089   | NM_000602       | SERPINE1     | serpin peptidase inhibitor, clade E (nexin, plasminogen activ | ENST00000445463 | -0,709418196 |
| A_21_P0005169  | TCONS_00012742  | XLOC_005739  |                                                               |                 | -0,70950715  |
| A_21_P0002349  | TCONS_00004018  | XLOC_001856  |                                                               |                 | -0,709691185 |
| A_23_P154806   | NM_012156       | EPB41L1      | erythrocyte membrane protein band 4.1-like 1                  | ENST00000373951 | -0,709709714 |
| A_23_P110212   | NM_001995       | ACSL1        | acyl-CoA synthetase long-chain family member 1                | ENST00000281455 | -0,710190902 |
| A_24_P158089   | NM_000602       | SERPINE1     | serpin peptidase inhibitor, clade E (nexin, plasminogen activ | ENST00000445463 | -0,71029983  |
| A_33_P3332362  | NM_001207026    | POU2F2       | POU class 2 homeobox 2                                        | ENST00000342301 | -0,710407109 |
| A_24_P342807   | NM_017964       | SLC30A6      | solute carrier family 30 (zinc transporter), member 6         | ENST00000435660 | -0,710413342 |
| A_24_P158089   | NM_000602       | SERPINE1     | serpin peptidase inhibitor, clade E (nexin, plasminogen activ | ENST00000445463 | -0,710444185 |



|                |                                  |              |                                                                |                 |              |
|----------------|----------------------------------|--------------|----------------------------------------------------------------|-----------------|--------------|
| A_33_P3251492  | NR_026913                        | LOC100133669 | uncharacterized LOC100133669                                   |                 | -0,710830597 |
| A_23_P433798   | NM_024825                        | PODNL1       | podocan-like 1                                                 | ENST00000254320 | -0,710854822 |
| A_23_P104876   | NM_017425                        | SPA17        | sperm autoantigenic protein 17                                 | ENST00000524614 | -0,711145931 |
| A_23_P103511   | NM_001085375                     | C1orf226     | chromosome 1 open reading frame 226                            | ENST00000458626 | -0,711369762 |
| A_23_P24444    | NM_001360                        | DHCR7        | 7-dehydrocholesterol reductase                                 | ENST00000355527 | -0,711448207 |
| A_23_P110791   | NM_005211                        | CSF1R        | colony stimulating factor 1 receptor                           | ENST00000286301 | -0,711487548 |
| A_23_P33759    | NM_004753                        | DHRS3        | dehydrogenase/reductase (SDR family) member 3                  | ENST00000376223 | -0,711556347 |
| A_33_P3241786  | NM_017482                        | ADD2         | adducin 2 (beta)                                               | ENST00000413157 | -0,711698968 |
| A_23_P252541   | NM_177403                        | RAB7B        | RAB7B, member RAS oncogene family                              |                 | -0,712282081 |
| A_23_P110184   | NM_006745                        | MSMO1        | methylsterol monooxygenase 1                                   | ENST00000393766 | -0,712310502 |
| A_19_P00322184 | ENST00000436710                  | LOC100506119 |                                                                | ENST00000436710 | -0,712389386 |
| A_33_P3417313  | NM_023078                        | PYCR1        | pyrroline-5-carboxylate reductase-like                         | ENST00000377579 | -0,712665434 |
| A_23_P120566   | NM_001042576                     | RRBP1        | ribosome binding protein 1 homolog 180kDa (dog)                | ENST00000455029 | -0,712705401 |
| A_23_P110212   | NM_001995                        | ACSL1        | acyl-CoA synthetase long-chain family member 1                 | ENST00000281455 | -0,712899188 |
| A_21_P0011668  | TCONS_I2_0001226; XLOC_I2_006575 |              |                                                                |                 | -0,712978419 |
| A_24_P270460   | NM_005532                        | IFI27        | interferon, alpha-inducible protein 27                         | ENST00000555121 | -0,713060544 |
| A_33_P3379091  | NM_145731                        | SYNGR1       | synaptogyrin 1                                                 |                 | -0,713080653 |
| A_21_P0008328  | TCONS_00022481                   | XLOC_010810  |                                                                |                 | -0,713161648 |
| A_21_P0001976  | ENST00000455128                  | XLOC_001897  |                                                                | ENST00000455128 | -0,713279111 |
| A_23_P68155    | NM_022168                        | IFIH1        | interferon induced with helicase C domain 1                    | ENST00000543192 | -0,713573686 |
| A_23_P127565   | NM_178834                        | LAYN         | layilin                                                        | ENST00000375615 | -0,713698923 |
| A_24_P6305     | NM_006013                        | RPL10        | ribosomal protein L10                                          | ENST00000424325 | -0,713706665 |
| A_21_P0003867  | TCONS_00008950                   | XLOC_003805  |                                                                |                 | -0,713708037 |
| A_23_P210708   | NM_001040022                     | SIRPA        | signal-regulatory protein alpha                                | ENST00000358771 | -0,713748553 |
| A_23_P106844   | NM_005953                        | MT2A         | metallothionein 2A                                             | ENST00000245185 | -0,713770619 |
| A_23_P160159   | NM_003039                        | SLC2A5       | solute carrier family 2 (facilitated glucose/fructose transpor | ENST00000377424 | -0,713861904 |
| A_23_P110212   | NM_001995                        | ACSL1        | acyl-CoA synthetase long-chain family member 1                 | ENST00000281455 | -0,713996366 |
| A_19_P00316135 | NR_027252                        | CYP1B1-AS1   |                                                                | ENST00000413828 | -0,714010902 |
| A_33_P3666817  | NM_001001791                     | C10orf55     | chromosome 10 open reading frame 55                            | ENST00000412307 | -0,714013079 |

|               |                |             |                                                                 |                 |              |
|---------------|----------------|-------------|-----------------------------------------------------------------|-----------------|--------------|
| A_23_P122508  | NM_080870      | DPCR1       | diffuse panbronchiolitis critical region 1                      | ENST00000414703 | -0,714201494 |
| A_23_P120467  | NM_199427      | ZFP64       | zinc finger protein 64 homolog (mouse)                          | ENST00000361387 | -0,714473017 |
| A_23_P110212  | NM_001995      | ACSL1       | acyl-CoA synthetase long-chain family member 1                  | ENST00000281455 | -0,714492288 |
| A_23_P254842  | NM_012080      | HDHD1       | haloacid dehalogenase-like hydrolase domain containing 1        | ENST00000544385 | -0,714513847 |
| A_23_P256473  | NM_006379      | SEMA3C      | sema domain, immunoglobulin domain (Ig), short basic don        | ENST00000265361 | -0,714865902 |
| A_21_P0005162 | AK055022       | XLOC_005681 |                                                                 |                 | -0,715326542 |
| A_23_P99452   | NM_000059      | BRCA2       | breast cancer 2, early onset                                    | ENST00000380152 | -0,715363342 |
| A_23_P11984   | NM_201649      | SLC6A9      | solute carrier family 6 (neurotransmitter transporter, glycine) | ENST00000537678 | -0,71538209  |
| A_23_P58321   | NM_001237      | CCNA2       | cyclin A2                                                       | ENST00000274026 | -0,715409158 |
| A_23_P118246  | NM_016095      | GINS2       | GINS complex subunit 2 (Psf2 homolog)                           | ENST00000253462 | -0,715453838 |
| A_23_P141208  | NM_015510      | DHRS7B      | dehydrogenase/reductase (SDR family) member 7B                  | ENST00000346603 | -0,715562289 |
| A_23_P361940  | NM_003874      | CD84        | CD84 molecule                                                   | ENST00000368054 | -0,71561206  |
| A_23_P90933   | NM_080876      | DUSP19      | dual specificity phosphatase 19                                 | ENST00000342619 | -0,716301659 |
| A_23_P110212  | NM_001995      | ACSL1       | acyl-CoA synthetase long-chain family member 1                  | ENST00000281455 | -0,716797218 |
| A_23_P138507  | NM_001786      | CDK1        | cyclin-dependent kinase 1                                       | ENST00000448257 | -0,716859076 |
| A_21_P0002237 | TCONS_00003727 | XLOC_001515 |                                                                 |                 | -0,716948823 |
| A_33_P3303810 | NM_005558      | LAD1        | ladinin 1                                                       | ENST00000367313 | -0,716949898 |
| A_32_P48466   | NM_152505      | LCA5L       | Leber congenital amaurosis 5-like                               | ENST00000495240 | -0,716971908 |
| A_23_P77593   | NM_018052      | VAC14       | Vac14 homolog ( <i>S. cerevisiae</i> )                          | ENST00000536184 | -0,717180248 |
| A_33_P3354451 | NM_007028      | TRIM31      | tripartite motif containing 31                                  | ENST00000540829 | -0,717232548 |
| A_33_P3404706 | NM_001030288   | SPN         | sialophorin                                                     | ENST00000360121 | -0,717262547 |
| A_21_P0007136 | AK307308       | XLOC_009562 |                                                                 |                 | -0,717339087 |
| A_33_P3399263 | NM_001243539   | IL15RA      | interleukin 15 receptor, alpha                                  | ENST00000379972 | -0,717689825 |
| A_33_P3280779 | NM_025125      | C10orf57    | chromosome 10 open reading frame 57                             | ENST00000372274 | -0,717804595 |
| A_23_P24311   | NM_000695      | ALDH3B2     | aldehyde dehydrogenase 3 family, member B2                      | ENST00000349015 | -0,717905825 |
| A_23_P113393  | NM_017413      | APLN        | apelin                                                          | ENST00000307484 | -0,717931263 |
| A_33_P3232552 | NM_000857      | GUCY1B3     | guanylate cyclase 1, soluble, beta 3                            | ENST00000264424 | -0,718287914 |
| A_23_P419213  | NM_020817      | KIAA1407    | KIAA1407                                                        | ENST00000295878 | -0,718538008 |
| A_24_P678418  | NR_015415      | DICER1-AS   | DICER1 antisense RNA (non-protein coding)                       |                 | -0,718542317 |

|                |                 |                |                                                           |                 |              |
|----------------|-----------------|----------------|-----------------------------------------------------------|-----------------|--------------|
| A_23_P110791   | NM_005211       | CSF1R          | colony stimulating factor 1 receptor                      | ENST00000286301 | -0,718562744 |
| A_23_P114466   | NM_033284       | TBL1Y          | transducin (beta)-like 1, Y-linked                        | ENST00000383032 | -0,718707759 |
| A_33_P3672756  | XR_112106       | LOC284561      | uncharacterized LOC284561                                 |                 | -0,718760615 |
| A_23_P52668    | NM_005468       | NAALADL1       | N-acetylated alpha-linked acidic dipeptidase-like 1       | ENST00000531174 | -0,719601154 |
| A_33_P3421913  | NM_014333       | CADM1          | cell adhesion molecule 1                                  |                 | -0,719969386 |
| A_23_P303455   | NM_153832       | GPR161         | G protein-coupled receptor 161                            | ENST00000367835 | -0,720074317 |
| A_21_P0011948  | ENST00000439362 | XLOC_I2_008203 |                                                           | ENST00000439362 | -0,720132425 |
| A_23_P350574   | NM_001002901    | FCRLB          | Fc receptor-like B                                        | ENST00000495397 | -0,72013805  |
| A_23_P110212   | NM_001995       | ACSL1          | acyl-CoA synthetase long-chain family member 1            | ENST00000281455 | -0,72015417  |
| A_23_P32135    | NM_018956       | C9orf9         | chromosome 9 open reading frame 9                         | ENST00000350499 | -0,721049109 |
| A_23_P1331     | NM_080801       | COL13A1        | collagen, type XIII, alpha 1                              | ENST00000478219 | -0,721063349 |
| A_21_P0014829  | XR_132680       | LOC100652760   | uncharacterized LOC100652760                              |                 | -0,72128681  |
| A_24_P378987   | NM_145177       | DHRX           | dehydrogenase/reductase (SDR family) X-linked             | ENST00000334651 | -0,72143346  |
| A_21_P0013701  | AK095210        | XLOC_I2_014850 |                                                           |                 | -0,721569964 |
| A_21_P0000664  | ENST00000544344 | CD4            | CD4 molecule                                              | ENST00000544344 | -0,721584809 |
| A_33_P3348782  | NM_030622       | CYP2S1         | cytochrome P450, family 2, subfamily S, polypeptide 1     | ENST00000301173 | -0,721804375 |
| A_23_P254978   | NM_032026       | TATDN1         | TatD DNase domain containing 1                            | ENST00000523888 | -0,721905829 |
| A_23_P426663   | NM_198159       | MITF           | microphthalmia-associated transcription factor            | ENST00000394355 | -0,722004237 |
| A_24_P12626    | NM_001753       | CAV1           | caveolin 1, caveolae protein, 22kDa                       | ENST00000451122 | -0,722069273 |
| A_33_P3370310  | NM_001171796    | C8orf83        | chromosome 8 open reading frame 83                        | ENST00000378861 | -0,72219154  |
| A_19_P00320144 | ENST00000502775 | XLOC_003428    |                                                           | ENST00000502775 | -0,722353689 |
| A_23_P147605   | NM_001003676    | C11orf49       | chromosome 11 open reading frame 49                       | ENST00000278460 | -0,722405481 |
| A_23_P257355   | NM_000531       | OTC            | ornithine carbamoyltransferase                            | ENST00000039007 | -0,722498346 |
| A_24_P40529    | NM_018196       | TMLHE          | trimethyllysine hydroxylase, epsilon                      | ENST00000334398 | -0,722547109 |
| A_23_P58321    | NM_001237       | CCNA2          | cyclin A2                                                 | ENST00000274026 | -0,722675338 |
| A_23_P105562   | NM_000552       | VWF            | von Willebrand factor                                     | ENST00000261405 | -0,722698794 |
| A_23_P119102   | NM_003370       | VASP           | vasodilator-stimulated phosphoprotein                     | ENST00000245932 | -0,722753622 |
| A_33_P3352827  | NM_003037       | SLAMF1         | signaling lymphocytic activation molecule family member 1 | ENST00000355199 | -0,722789904 |
| A_23_P70448    | NM_005325       | HIST1H1A       | histone cluster 1, H1a                                    | ENST00000244573 | -0,723034811 |

|                |                  |                |                                                                     |                 |              |
|----------------|------------------|----------------|---------------------------------------------------------------------|-----------------|--------------|
| A_24_P80204    | NM_005434        | MALL           | mal, T-cell differentiation protein-like                            | ENST00000272462 | -0,723120779 |
| A_21_P0010909  | NR_034125        | LOC387723      | uncharacterized LOC387723                                           |                 | -0,723233288 |
| A_23_P41470    | NM_017631        | DDX60          | DEAD (Asp-Glu-Ala-Asp) box polypeptide 60                           | ENST00000393743 | -0,72332924  |
| A_21_P0006498  | THC2714876       | XLOC_007992    |                                                                     |                 | -0,723697773 |
| A_24_P210637   | NM_130468        | CHST14         | carbohydrate (N-acetylgalactosamine 4-0) sulfotransferase           | ENST00000306243 | -0,723870329 |
| A_33_P3362900  | NM_001145710     | LOC375190      | UPF0638 protein B                                                   | ENST00000420135 | -0,723909029 |
| A_33_P3249574  | NM_004866        | SCAMP1         | secretory carrier membrane protein 1                                | ENST00000538629 | -0,72400381  |
| A_23_P372946   | NM_138461        | TM4SF19        | transmembrane 4 L six family member 19                              | ENST00000442633 | -0,7241257   |
| A_33_P3225522  | NM_001032731     | OAS2           | 2'-5'-oligoadenylate synthetase 2, 69/71kDa                         | ENST00000449768 | -0,724650129 |
| A_24_P402080   | NM_001025100     | MBP            | myelin basic protein                                                | ENST00000397860 | -0,724702644 |
| A_33_P3274416  | NR_034179        | LOC653712      | intraflagellar transport 122 homolog (Chlamydomonas) pse            | ENST00000480931 | -0,725028655 |
| A_23_P139600   | NM_004658        | RASAL1         | RAS protein activator like 1 (GAP1 like)                            | ENST00000446861 | -0,725223155 |
| A_23_P145096   | NM_005084        | PLA2G7         | phospholipase A2, group VII (platelet-activating factor acety       | ENST00000537365 | -0,725486327 |
| A_24_P333857   | NM_032291        | SGIP1          | SH3-domain GRB2-like (endophilin) interacting protein 1             | ENST00000237247 | -0,725555572 |
| A_23_P110791   | NM_005211        | CSF1R          | colony stimulating factor 1 receptor                                | ENST00000286301 | -0,725604651 |
| A_33_P3226550  | AK128321         | SLC4A8         | solute carrier family 4, sodium bicarbonate cotransporter, member 8 |                 | -0,725792065 |
| A_23_P73609    | NM_000266        | NDP            | Norrie disease (pseudoglioma)                                       | ENST00000378062 | -0,725793632 |
| A_21_P0010561  | NM_001244910     | FCGR1B         | Fc fragment of IgG, high affinity Ib, receptor (CD64)               | ENST00000369178 | -0,725881687 |
| A_23_P58321    | NM_001237        | CCNA2          | cyclin A2                                                           | ENST00000274026 | -0,725936499 |
| A_23_P119102   | NM_003370        | VASP           | vasodilator-stimulated phosphoprotein                               | ENST00000245932 | -0,726114785 |
| A_23_P435407   | NM_001448        | GPC4           | glypican 4                                                          | ENST00000536418 | -0,726130583 |
| A_23_P85682    | NM_005595        | NFIA           | nuclear factor I/A                                                  | ENST00000371187 | -0,726484731 |
| A_24_P753161   | NM_001204        | BMPR2          | bone morphogenetic protein receptor, type II (serine/threo          | ENST00000374580 | -0,726525159 |
| A_21_P0006675  | ENST00000442526  | XLOC_008467    |                                                                     | ENST00000442526 | -0,726582474 |
| A_23_P99452    | NM_000059        | BRCA2          | breast cancer 2, early onset                                        | ENST00000380152 | -0,726678722 |
| A_21_P0012543  | TCONS_I2_0002013 | XLOC_I2_010239 |                                                                     |                 | -0,726752078 |
| A_33_P3242863  | NM_020201        | NT5M           | 5',3'-nucleotidase, mitochondrial                                   | ENST00000389022 | -0,726941927 |
| A_19_P00318495 | NR_026761        | LINC00467      | long intergenic non-protein coding RNA 467                          |                 | -0,727150178 |
| A_24_P227091   | NM_004523        | KIF11          | kinesin family member 11                                            | ENST00000260731 | -0,727186308 |

|                |                 |              |                                                               |                 |              |
|----------------|-----------------|--------------|---------------------------------------------------------------|-----------------|--------------|
| A_33_P3818787  | NR_027277       | LOC344967    | acyl-CoA thioesterase 7 pseudogene                            | ENST00000381811 | -0,727228796 |
| A_32_P209094   | NM_018291       | FGGY         | FGGY carbohydrate kinase domain containing                    | ENST00000480847 | -0,727403674 |
| A_24_P389916   | NM_005512       | LRRC32       | leucine rich repeat containing 32                             | ENST00000404995 | -0,727615179 |
| A_23_P384044   | NM_152495       | CNIH3        | cornichon homolog 3 (Drosophila)                              | ENST00000272133 | -0,727642227 |
| A_23_P34093    | NM_000402       | G6PD         | glucose-6-phosphate dehydrogenase                             | ENST00000369620 | -0,727663679 |
| A_33_P3296181  | NM_001001437    | CCL3L3       | chemokine (C-C motif) ligand 3-like 3                         | ENST00000394484 | -0,727800897 |
| A_23_P114466   | NM_033284       | TBL1Y        | transducin (beta)-like 1, Y-linked                            | ENST00000383032 | -0,727809247 |
| A_21_P0010405  | THC2613584      | XLOC_014192  |                                                               |                 | -0,727885195 |
| A_21_P0007155  | ENST00000415809 | XLOC_009363  |                                                               | ENST00000415809 | -0,727893771 |
| A_23_P110184   | NM_006745       | MSMO1        | methylsterol monooxygenase 1                                  | ENST00000393766 | -0,727904094 |
| A_23_P119102   | NM_003370       | VASP         | vasodilator-stimulated phosphoprotein                         | ENST00000245932 | -0,727904639 |
| A_24_P171268   | NM_182663       | RASSF5       | Ras association (RalGDS/AF-6) domain family member 5          | ENST00000304534 | -0,727968347 |
| A_21_P0000069  | NM_001167915    | VEPH1        | ventricular zone expressed PH domain homolog 1 (zebrafish)    | ENST00000468233 | -0,728432708 |
| A_24_P33982    | NM_001085423    | MILR1        | mast cell immunoglobulin-like receptor 1                      |                 | -0,728530074 |
| A_23_P26994    | NM_031498       | GNGT2        | guanine nucleotide binding protein (G protein), gamma trar    | ENST00000515635 | -0,728689586 |
| A_23_P69573    | NM_000856       | GUCY1A3      | guanylate cyclase 1, soluble, alpha 3                         | ENST00000455639 | -0,728768484 |
| A_21_P0007486  | ENST00000400306 | XLOC_009791  |                                                               | ENST00000400306 | -0,7289514   |
| A_23_P166526   | NM_015653       | RIBC2        | RIB43A domain with coiled-coils 2                             | ENST00000538017 | -0,729380669 |
| A_23_P80032    | NM_005225       | E2F1         | E2F transcription factor 1                                    | ENST00000343380 | -0,729906615 |
| A_21_P0004931  | DA260573        | XLOC_005449  |                                                               |                 | -0,729947715 |
| A_23_P103486   | NM_000775       | CYP2J2       | cytochrome P450, family 2, subfamily J, polypeptide 2         | ENST00000469406 | -0,730691777 |
| A_21_P0008874  | AK056683        | XLOC_011755  |                                                               |                 | -0,73094128  |
| A_19_P00317277 | AK055877        | LOC100506328 | uncharacterized LOC100506328                                  |                 | -0,731007542 |
| A_33_P3246763  | NM_001166579    | AANAT        | aralkylamine N-acetyltransferase                              | ENST00000250615 | -0,731257796 |
| A_33_P3216601  | NM_002012       | FHIT         | fragile histidine triad gene                                  | ENST00000341848 | -0,731837168 |
| A_24_P334130   | NM_054034       | FN1          | fibronectin 1                                                 | ENST00000426059 | -0,732002247 |
| A_24_P158089   | NM_000602       | SERPINE1     | serpin peptidase inhibitor, clade E (nexin, plasminogen activ | ENST00000445463 | -0,732041702 |
| A_23_P100386   | NM_152456       | IL34         | interleukin 34                                                | ENST00000429149 | -0,73207961  |
| A_33_P3257594  | NM_213607       | CCDC103      | coiled-coil domain containing 103                             | ENST00000357776 | -0,732142038 |



|                |                |                |                                                                                     |                 |              |
|----------------|----------------|----------------|-------------------------------------------------------------------------------------|-----------------|--------------|
| A_23_P56759    | NM_016618      | KRCC1          | lysine-rich coiled-coil 1                                                           | ENST00000347055 | -0,732166292 |
| A_23_P85716    | NM_021642      | FCGR2A         | Fc fragment of IgG, low affinity IIa, receptor (CD32)                               | ENST00000471026 | -0,732168031 |
| A_23_P71530    | NM_002546      | TNFRSF11B      | tumor necrosis factor receptor superfamily, member 11b                              | ENST00000521597 | -0,732578898 |
| A_23_P155857   | NM_198041      | NUDT6          | nudix (nucleoside diphosphate linked moiety X)-type motif                           | ENST00000502270 | -0,732867697 |
| A_23_P114466   | NM_033284      | TBL1Y          | transducin (beta)-like 1, Y-linked                                                  | ENST00000383032 | -0,732879412 |
| A_23_P414978   | NM_177533      | NUDT14         | nudix (nucleoside diphosphate linked moiety X)-type motif                           | ENST00000339418 | -0,732949428 |
| A_33_P3349145  | NM_012263      | TTL1           | tubulin tyrosine ligase-like family, member 1                                       | ENST00000331018 | -0,732960811 |
| A_24_P158089   | NM_000602      | SERPINE1       | serpin peptidase inhibitor, clade E (nexin, plasminogen activator inhibitor type 1) | ENST00000445463 | -0,73298836  |
| A_19_P00804093 | NM_173463      | CCDC149        | coiled-coil domain containing 149                                                   | ENST00000507096 | -0,732991249 |
| A_33_P3416574  | NM_016108      | AIG1           | androgen-induced 1                                                                  | ENST00000367601 | -0,733561504 |
| A_23_P112846   | NM_001144978   | MTHFD2L        | methylenetetrahydrofolate dehydrogenase (NADP+ dependent)                           | ENST00000492183 | -0,733672619 |
| A_23_P206359   | NM_004360      | CDH1           | cadherin 1, type 1, E-cadherin (epithelial)                                         | ENST00000261769 | -0,73371749  |
| A_33_P3258977  | NM_080387      | CLEC4D         | C-type lectin domain family 4, member D                                             | ENST00000299665 | -0,734209323 |
| A_23_P26629    | NM_013258      | PYCARD         | PYD and CARD domain containing                                                      | ENST00000355986 | -0,734277793 |
| A_21_P0014154  | XR_108621      | LOC100507367   | uncharacterized LOC100507367                                                        |                 | -0,734279106 |
| A_24_P413884   | NM_001809      | CENPA          | centromere protein A                                                                | ENST00000233505 | -0,734319332 |
| A_23_P121564   | NM_000857      | GUCY1B3        | guanylate cyclase 1, soluble, beta 3                                                | ENST00000264424 | -0,734393802 |
| A_23_P118246   | NM_016095      | GINS2          | GINS complex subunit 2 (Psf2 homolog)                                               | ENST00000253462 | -0,734547132 |
| A_23_P110791   | NM_005211      | CSF1R          | colony stimulating factor 1 receptor                                                | ENST00000286301 | -0,734656616 |
| A_19_P00805625 | BC038559       | LOC100506190   | uncharacterized LOC100506190                                                        |                 | -0,734696332 |
| A_21_P0007411  | TCONS_00019780 | XLOC_009578    |                                                                                     |                 | -0,734706395 |
| A_33_P3316273  | NM_002983      | CCL3           | chemokine (C-C motif) ligand 3                                                      | ENST00000470334 | -0,735006414 |
| A_23_P104876   | NM_017425      | SPA17          | sperm autoantigenic protein 17                                                      | ENST00000524614 | -0,735262015 |
| A_23_P76078    | NM_016584      | IL23A          | interleukin 23, alpha subunit p19                                                   | ENST00000228534 | -0,735400944 |
| A_23_P166087   | NM_014737      | RASSF2         | Ras association (RalGDS/AF-6) domain family member 2                                | ENST00000379376 | -0,735460496 |
| A_23_P104876   | NM_017425      | SPA17          | sperm autoantigenic protein 17                                                      | ENST00000524614 | -0,735574849 |
| A_23_P302568   | NM_003459      | SLC30A3        | solute carrier family 30 (zinc transporter), member 3                               | ENST00000233535 | -0,735613932 |
| A_23_P121564   | NM_000857      | GUCY1B3        | guanylate cyclase 1, soluble, beta 3                                                | ENST00000264424 | -0,735725929 |
| A_19_P00327354 | AK057050       | XLOC_l2_015037 |                                                                                     |                 | -0,735754324 |

|               |                |             |                                                                                     |                 |              |
|---------------|----------------|-------------|-------------------------------------------------------------------------------------|-----------------|--------------|
| A_23_P208334  | NM_006202      | PDE4A       | phosphodiesterase 4A, cAMP-specific                                                 | ENST00000419866 | -0,735855308 |
| A_24_P158089  | NM_000602      | SERPINE1    | serpin peptidase inhibitor, clade E (nexin, plasminogen activator inhibitor type 1) | ENST00000445463 | -0,736115627 |
| A_24_P276628  | NM_000310      | PPT1        | palmitoyl-protein thioesterase 1                                                    | ENST00000527107 | -0,736266647 |
| A_23_P10647   | NM_018659      | CYTL1       | cytokine-like 1                                                                     | ENST00000307746 | -0,736319912 |
| A_23_P110184  | NM_006745      | MSMO1       | methylsterol monooxygenase 1                                                        | ENST00000393766 | -0,736447865 |
| A_33_P3392537 | NM_004614      | TK2         | thymidine kinase 2, mitochondrial                                                   | ENST00000451102 | -0,736523745 |
| A_23_P121480  | NM_001004196   | CD200       | CD200 molecule                                                                      | ENST00000478595 | -0,736586326 |
| A_21_P0003581 | TCONS_00008003 | XLOC_003469 |                                                                                     |                 | -0,736777373 |
| A_23_P110791  | NM_005211      | CSF1R       | colony stimulating factor 1 receptor                                                | ENST00000286301 | -0,73681574  |
| A_33_P3401459 | NM_020971      | SPTBN4      | spectrin, beta, non-erythrocytic 4                                                  | ENST00000344104 | -0,736936052 |
| A_23_P35995   | NM_024769      | CLMP        | CXADR-like membrane protein                                                         | ENST00000448775 | -0,736954217 |
| A_24_P295806  | NM_023947      | CHID1       | chitinase domain containing 1                                                       | ENST00000528426 | -0,737221528 |
| A_21_P0007563 | TCONS_00021139 | XLOC_009765 |                                                                                     |                 | -0,737422354 |
| A_23_P95029   | NM_021021      | SNTB1       | syntrophin, beta 1 (dystrophin-associated protein A1, 59kDa)                        | ENST00000395601 | -0,737568526 |
| A_23_P110791  | NM_005211      | CSF1R       | colony stimulating factor 1 receptor                                                | ENST00000286301 | -0,737701655 |
| A_24_P352952  | NM_017565      | FAM20A      | family with sequence similarity 20, member A                                        | ENST00000375556 | -0,737804411 |
| A_33_P3233906 | NM_005855      | RAMP1       | receptor (G protein-coupled) activity modifying protein 1                           | ENST00000254661 | -0,738235668 |
| A_23_P50108   | NM_006101      | NDC80       | NDC80 homolog, kinetochore complex component (S. cerevisiae)                        | ENST00000261597 | -0,738308762 |
| A_23_P10291   | NM_001910      | CTSE        | cathepsin E                                                                         | ENST00000360218 | -0,738345995 |
| A_24_P158089  | NM_000602      | SERPINE1    | serpin peptidase inhibitor, clade E (nexin, plasminogen activator inhibitor type 1) | ENST00000445463 | -0,738420362 |
| A_23_P110791  | NM_005211      | CSF1R       | colony stimulating factor 1 receptor                                                | ENST00000286301 | -0,738459449 |
| A_23_P105562  | NM_000552      | VWF         | von Willebrand factor                                                               | ENST00000261405 | -0,738516977 |
| A_24_P37589   | NM_001099      | ACPP        | acid phosphatase, prostate                                                          | ENST00000512463 | -0,738576919 |
| A_23_P101434  | NM_033297      | NLRP12      | NLR family, pyrin domain containing 12                                              | ENST00000391773 | -0,738582113 |
| A_23_P218412  | NM_004890      | SPAG7       | sperm associated antigen 7                                                          | ENST00000206020 | -0,738611666 |
| A_23_P255104  | NM_005779      | LHFPL2      | lipoma HMGIC fusion partner-like 2                                                  | ENST00000515007 | -0,738971095 |
| A_23_P99452   | NM_000059      | BRCA2       | breast cancer 2, early onset                                                        | ENST00000380152 | -0,739102734 |
| A_33_P3260430 | NM_005988      | SPRR2A      | small proline-rich protein 2A                                                       | ENST00000392653 | -0,739156356 |
| A_23_P1014    | NR_026761      | LINC00467   | long intergenic non-protein coding RNA 467                                          |                 | -0,739160162 |

|                |                |             |                                                              |                 |              |
|----------------|----------------|-------------|--------------------------------------------------------------|-----------------|--------------|
| A_32_P131640   | NM_173078      | SLITRK4     | SLIT and NTRK-like family, member 4                          | ENST00000338017 | -0,739369321 |
| A_33_P3359027  | NM_001144872   | CCDC42B     | coiled-coil domain containing 42B                            | ENST00000551256 | -0,739392321 |
| A_23_P55251    | NM_002204      | ITGA3       | integrin, alpha 3 (antigen CD49C, alpha 3 subunit of VLA-3 r | ENST00000505306 | -0,739478674 |
| A_23_P42909    | NM_153345      | TMEM139     | transmembrane protein 139                                    | ENST00000409244 | -0,739573455 |
| A_23_P218086   | NM_001143819   | TPCN1       | two pore segment channel 1                                   | ENST00000541517 | -0,739598112 |
| A_21_P0010418  | TCONS_00029821 | XLOC_014257 |                                                              |                 | -0,739627262 |
| A_21_P0000169  | NM_001206790   | TMPRSS13    | transmembrane protease, serine 13                            | ENST00000526090 | -0,739765898 |
| A_24_P206343   | NM_033054      | MYO1G       | myosin IG                                                    | ENST00000488554 | -0,739826557 |
| A_23_P420256   | NM_021925      | C2orf43     | chromosome 2 open reading frame 43                           | ENST00000237822 | -0,740032806 |
| A_23_P107421   | NM_003258      | TK1         | thymidine kinase 1, soluble                                  | ENST00000405273 | -0,740511753 |
| A_33_P3368188  | NM_006640      | Sep-09      | septin 9                                                     | ENST00000397613 | -0,740647871 |
| A_23_P104876   | NM_017425      | SPA17       | sperm autoantigenic protein 17                               | ENST00000524614 | -0,74107313  |
| A_33_P3224190  | NM_001040661   | SLC29A4     | solute carrier family 29 (nucleoside transporters), member 4 | ENST00000297195 | -0,741282389 |
| A_23_P432947   | NM_013372      | GREM1       | gremlin 1                                                    | ENST00000300177 | -0,741326502 |
| A_33_P3359061  | NM_198537      | YJEFN3      | YjeF N-terminal domain containing 3                          | ENST00000512771 | -0,74178921  |
| A_23_P101972   | NM_144575      | CAPN13      | calpain 13                                                   | ENST00000534090 | -0,742032663 |
| A_33_P3317253  | NM_001001484   | PTER        | phosphotriesterase related                                   | ENST00000378000 | -0,742077323 |
| A_23_P114466   | NM_033284      | TBL1Y       | transducin (beta)-like 1, Y-linked                           | ENST00000383032 | -0,7420836   |
| A_24_P133905   | NM_005064      | CCL23       | chemokine (C-C motif) ligand 23                              | ENST00000293280 | -0,742087804 |
| A_23_P110791   | NM_005211      | CSF1R       | colony stimulating factor 1 receptor                         | ENST00000286301 | -0,742114784 |
| A_23_P412562   | NM_174896      | C1orf162    | chromosome 1 open reading frame 162                          | ENST00000369718 | -0,742237709 |
| A_23_P61960    | NM_145230      | ATP6V0E2    | ATPase, H+ transporting V0 subunit e2                        | ENST00000307445 | -0,742477129 |
| A_21_P0002052  | TCONS_00003286 | XLOC_002099 |                                                              |                 | -0,742537482 |
| A_33_P3210671  | NM_207328      | GPAT2       | glycerol-3-phosphate acyltransferase 2, mitochondrial        | ENST00000458519 | -0,742604304 |
| A_23_P109171   | NM_001195      | BFSP1       | beaded filament structural protein 1, filensin               | ENST00000536626 | -0,742823881 |
| A_19_P00318494 | NR_026761      | LINC00467   | long intergenic non-protein coding RNA 467                   |                 | -0,742863278 |
| A_24_P414376   | NM_016531      | KLF3        | Kruppel-like factor 3 (basic)                                | ENST00000261438 | -0,743275137 |
| A_23_P110791   | NM_005211      | CSF1R       | colony stimulating factor 1 receptor                         | ENST00000286301 | -0,743843372 |
| A_23_P148475   | NM_012310      | KIF4A       | kinesin family member 4A                                     | ENST00000544650 | -0,743925717 |

|                |                  |                |                                                          |                 |              |
|----------------|------------------|----------------|----------------------------------------------------------|-----------------|--------------|
| A_23_P105562   | NM_000552        | VWF            | von Willebrand factor                                    | ENST00000261405 | -0,744042521 |
| A_33_P3307903  | NM_005192        | CDKN3          | cyclin-dependent kinase inhibitor 3                      | ENST00000216414 | -0,744805861 |
| A_33_P3217649  | NM_001048265     | C9orf116       | chromosome 9 open reading frame 116                      | ENST00000371786 | -0,744830987 |
| A_23_P50990    | NM_024322        | CENPO          | centromere protein O                                     | ENST00000260662 | -0,745205555 |
| A_23_P129209   | NM_002168        | IDH2           | isocitrate dehydrogenase 2 (NADP+), mitochondrial        | ENST00000540499 | -0,745231469 |
| A_33_P3245734  | NM_001130022     | ZNF680         | zinc finger protein 680                                  | ENST00000447137 | -0,745344698 |
| A_23_P11841    | NM_001684        | ATP2B4         | ATPase, Ca <sup>++</sup> transporting, plasma membrane 4 | ENST00000341360 | -0,745355473 |
| A_21_P0007856  | TCONS_00021241   | XLOC_009926    |                                                          |                 | -0,745633912 |
| A_21_P0012695  | TCONS_I2_0002138 | XLOC_I2_011350 |                                                          |                 | -0,745660795 |
| A_33_P3381313  | NM_001109977     | FAM160A1       | family with sequence similarity 160, member A1           | ENST00000505231 | -0,745826023 |
| A_21_P0010522  | ENST00000451482  | XLOC_I2_000116 |                                                          | ENST00000451482 | -0,74587949  |
| A_23_P388812   | NM_152515        | CKAP2L         | cytoskeleton associated protein 2-like                   | ENST00000435431 | -0,74592622  |
| A_19_P00317144 | AK096731         | XLOC_005595    | 0                                                        |                 | -0,746312181 |
| A_21_P0013858  | ENST00000449645  | TMLHE          | trimethyllysine hydroxylase, epsilon                     | ENST00000449645 | -0,746536428 |
| A_33_P3216714  | NM_014787        | DNAJC6         | DnaJ (Hsp40) homolog, subfamily C, member 6              | ENST00000371069 | -0,746642258 |
| A_23_P1014     | NR_026761        | LINC00467      | long intergenic non-protein coding RNA 467               |                 | -0,746647794 |
| A_23_P112846   | NM_001144978     | MTHFD2L        | methylenetetrahydrofolate dehydrogenase (NADP+ depend    | ENST00000492183 | -0,746755988 |
| A_21_P0003821  | TCONS_00008716   | XLOC_004229    |                                                          |                 | -0,746817378 |
| A_23_P118      | NM_001439        | EXTL2          | exostoses (multiple)-like 2                              | ENST00000370114 | -0,747105291 |
| A_23_P12082    | NM_001025199     | CHI3L2         | chitinase 3-like 2                                       | ENST00000369748 | -0,747125045 |
| A_33_P3403399  | NM_018242        | SLC47A1        | solute carrier family 47, member 1                       | ENST00000395585 | -0,747306358 |
| A_33_P3319126  | NM_175710        | CR1L           | complement component (3b/4b) receptor 1-like             | ENST00000444269 | -0,747704619 |
| A_19_P00315804 | NR_015375        | FLJ35024       | uncharacterized LOC401491                                |                 | -0,747815349 |
| A_33_P3214105  | NM_001674        | ATF3           | activating transcription factor 3                        | ENST00000366981 | -0,748029872 |
| A_23_P109171   | NM_001195        | BFSP1          | beaded filament structural protein 1, filensin           | ENST00000536626 | -0,748051926 |
| A_33_P3867534  | NM_182751        | MCM10          | minichromosome maintenance complex component 10          | ENST00000361282 | -0,748252123 |
| A_23_P105794   | NM_033255        | EPSTI1         | epithelial stromal interaction 1 (breast)                | ENST00000476830 | -0,748665594 |
| A_23_P113613   | NM_022842        | CDCP1          | CUB domain containing protein 1                          | ENST00000296129 | -0,748796449 |
| A_23_P112452   | NR_003191        | GGTA1P         | glycoprotein, alpha-galactosyltransferase 1 pseudogene   | ENST00000373793 | -0,749046296 |

|               |                                 |                |                                                              |                 |              |
|---------------|---------------------------------|----------------|--------------------------------------------------------------|-----------------|--------------|
| A_23_P105562  | NM_000552                       | VWF            | von Willebrand factor                                        | ENST00000261405 | -0,749210665 |
| A_24_P940517  | NM_016297                       | PCYOX1         | prenylcysteine oxidase 1                                     | ENST00000433351 | -0,749847575 |
| A_23_P50368   | NM_206818                       | OSCAR          | osteoclast associated, immunoglobulin-like receptor          | ENST00000358375 | -0,749877925 |
| A_23_P103511  | NM_001085375                    | C1orf226       | chromosome 1 open reading frame 226                          | ENST00000458626 | -0,750165612 |
| A_21_P0013202 | TCONS_I2_0002590:XLOC_I2_013425 |                |                                                              |                 | -0,7502481   |
| A_32_P83845   | NM_001040708                    | HEY1           | hairy/enhancer-of-split related with YRPW motif 1            | ENST00000337919 | -0,750329293 |
| A_24_P125434  | NM_032243                       | TXNDC2         | thioredoxin domain containing 2 (spermatzoa)                 | ENST00000306084 | -0,750539074 |
| A_24_P393740  | NM_001465                       | FYB            | FYN binding protein                                          | ENST00000351578 | -0,750737442 |
| A_23_P105562  | NM_000552                       | VWF            | von Willebrand factor                                        | ENST00000261405 | -0,750986508 |
| A_23_P34307   | NM_005482                       | PIGK           | phosphatidylinositol glycan anchor biosynthesis, class K     | ENST00000370812 | -0,750987284 |
| A_32_P222695  | NM_001001669                    | ARHGGEF37      | Rho guanine nucleotide exchange factor (GEF) 37              | ENST00000333677 | -0,751087168 |
| A_23_P58321   | NM_001237                       | CCNA2          | cyclin A2                                                    | ENST00000274026 | -0,751530926 |
| A_21_P0010542 | ENST00000451023                 | XLOC_I2_000342 |                                                              | ENST00000451023 | -0,751619004 |
| A_24_P405205  | NM_001001396                    | ATP2B4         | ATPase, Ca <sup>++</sup> transporting, plasma membrane 4     | ENST00000367218 | -0,75178533  |
| A_23_P103486  | NM_000775                       | CYP2J2         | cytochrome P450, family 2, subfamily J, polypeptide 2        | ENST00000469406 | -0,752052892 |
| A_23_P121564  | NM_000857                       | GUCY1B3        | guanylate cyclase 1, soluble, beta 3                         | ENST00000264424 | -0,752151817 |
| A_23_P163481  | NM_001211                       | BUB1B          | budding uninhibited by benzimidazoles 1 homolog beta (ye:    | ENST00000412359 | -0,752158827 |
| A_23_P105562  | NM_000552                       | VWF            | von Willebrand factor                                        | ENST00000261405 | -0,752415083 |
| A_21_P0002935 | TCONS_00005961                  | XLOC_002592    |                                                              |                 | -0,752597976 |
| A_23_P206359  | NM_004360                       | CDH1           | cadherin 1, type 1, E-cadherin (epithelial)                  | ENST00000261769 | -0,752684939 |
| A_23_P157404  | NM_001283                       | AP1S1          | adaptor-related protein complex 1, sigma 1 subunit           | ENST00000337619 | -0,753160663 |
| A_23_P110184  | NM_006745                       | MSMO1          | methylsterol monooxygenase 1                                 | ENST00000393766 | -0,753483328 |
| A_21_P0012594 | NR_038303                       | LOC100505702   | uncharacterized LOC100505702                                 |                 | -0,753954251 |
| A_23_P67151   | NM_058164                       | OLFM2          | olfactomedin 2                                               | ENST00000264833 | -0,754113874 |
| A_23_P156180  | NM_003059                       | SLC22A4        | solute carrier family 22 (organic cation/ergothioneine trans | ENST00000200652 | -0,754200805 |
| A_23_P138507  | NM_001786                       | CDK1           | cyclin-dependent kinase 1                                    | ENST00000448257 | -0,754322667 |
| A_23_P310410  | NM_001042583                    | CD1E           | CD1e molecule                                                | ENST00000434258 | -0,754355748 |
| A_23_P119562  | NM_001928                       | CFD            | complement factor D (adipsin)                                | ENST00000327726 | -0,754444221 |
| A_33_P3258041 | NM_001037277                    | GGPS1          | geranylgeranyl diphosphate synthase 1                        | ENST00000358966 | -0,754525899 |



|               |                 |             |                                                          |                 |              |
|---------------|-----------------|-------------|----------------------------------------------------------|-----------------|--------------|
| A_23_P45560   | NM_000273       | GPR143      | G protein-coupled receptor 143                           | ENST00000380929 | -0,75466706  |
| A_23_P113748  | NM_024697       | ZNF385D     | zinc finger protein 385D                                 | ENST00000494118 | -0,754709446 |
| A_24_P192301  | NM_006080       | SEMA3A      | sema domain, immunoglobulin domain (Ig), short basic don | ENST00000265362 | -0,754902163 |
| A_23_P1014    | NR_026761       | LINC00467   | long intergenic non-protein coding RNA 467               |                 | -0,755051387 |
| A_23_P114466  | NM_033284       | TBL1Y       | transducin (beta)-like 1, Y-linked                       | ENST00000383032 | -0,755687615 |
| A_23_P103617  | NM_003568       | ANXA9       | annexin A9                                               | ENST00000368947 | -0,755946651 |
| A_23_P99452   | NM_000059       | BRCA2       | breast cancer 2, early onset                             | ENST00000380152 | -0,756070387 |
| A_23_P329924  | NM_177551       | HCAR2       | hydroxycarboxylic acid receptor 2                        | ENST00000536970 | -0,756176665 |
| A_23_P10647   | NM_018659       | CYTL1       | cytokine-like 1                                          | ENST00000307746 | -0,756179073 |
| A_23_P6381    | NM_002430       | MN1         | meningioma (disrupted in balanced translocation) 1       | ENST00000302326 | -0,756359931 |
| A_23_P152406  | NM_032330       | CAPNS2      | calpain, small subunit 2                                 | ENST00000457326 | -0,756640851 |
| A_33_P3382924 | NM_003118       | SPARC       | secreted protein, acidic, cysteine-rich (osteonectin)    | ENST00000231061 | -0,756826261 |
| A_33_P3376264 | ENST00000378938 | GK          | glycerol kinase                                          | ENST00000378938 | -0,756932948 |
| A_23_P166797  | NM_022147       | RTP4        | receptor (chemosensory) transporter protein 4            | ENST00000259030 | -0,757235274 |
| A_23_P165598  | NM_001017920    | DAPL1       | death associated protein-like 1                          | ENST00000309950 | -0,757851409 |
| A_23_P170857  | NM_002182       | IL1RAP      | interleukin 1 receptor accessory protein                 | ENST00000447382 | -0,757939268 |
| A_23_P104438  | NM_032578       | MYPN        | myopalladin                                              | ENST00000354393 | -0,758350468 |
| A_33_P3311755 | NM_138555       | KIF23       | kinesin family member 23                                 | ENST00000395392 | -0,758490763 |
| A_23_P106973  | NM_006640       | Sep-09      | septin 9                                                 | ENST00000329047 | -0,758986858 |
| A_21_P0003488 | ENST00000504082 | XLOC_004032 |                                                          | ENST00000504082 | -0,759106978 |
| A_23_P156667  | NM_002714       | PPP1R10     | protein phosphatase 1, regulatory subunit 10             | ENST00000376511 | -0,759401578 |
| A_23_P256956  | NM_005733       | KIF20A      | kinesin family member 20A                                | ENST00000502338 | -0,759403325 |
| A_33_P3276615 | NM_030643       | APOL4       | apolipoprotein L, 4                                      | ENST00000352371 | -0,759447239 |
| A_23_P10647   | NM_018659       | CYTL1       | cytokine-like 1                                          | ENST00000307746 | -0,75948135  |
| A_33_P3368014 | NM_001040107    | HVCN1       | hydrogen voltage-gated channel 1                         | ENST00000356742 | -0,759799047 |
| A_33_P3309621 | NR_002804       | SIGLECP3    | sialic acid binding Ig-like lectin, pseudogene 3         | ENST00000341811 | -0,759882382 |
| A_33_P3305758 | NM_001747       | CAPG        | capping protein (actin filament), gelsolin-like          | ENST00000415012 | -0,759974586 |
| A_23_P104876  | NM_017425       | SPA17       | sperm autoantigenic protein 17                           | ENST00000524614 | -0,760148946 |
| A_21_P0006228 | CF127220        | XLOC_007571 |                                                          |                 | -0,760495522 |

|                |                 |              |                                                            |                 |              |
|----------------|-----------------|--------------|------------------------------------------------------------|-----------------|--------------|
| A_23_P250564   | NM_005400       | PRKCE        | protein kinase C, epsilon                                  | ENST00000306156 | -0,760587083 |
| A_24_P143138   | NM_004463       | FGD1         | FYVE, RhoGEF and PH domain containing 1                    | ENST00000375135 | -0,760653218 |
| A_24_P319113   | NM_002562       | P2RX7        | purinergic receptor P2X, ligand-gated ion channel, 7       | ENST00000377162 | -0,760806947 |
| A_23_P1014     | NR_026761       | LINC00467    | long intergenic non-protein coding RNA 467                 |                 | -0,76088126  |
| A_33_P3606465  | NR_033754       | CBX3P2       | chromobox homolog 3 pseudogene 2                           |                 | -0,760921541 |
| A_19_P00802615 | NR_034089       | LOC100131564 | uncharacterized LOC100131564                               |                 | -0,761011393 |
| A_23_P80817    | NM_013259       | TAGLN3       | transgelin 3                                               | ENST00000478951 | -0,761308007 |
| A_24_P125335   | NM_005408       | CCL13        | chemokine (C-C motif) ligand 13                            | ENST00000225844 | -0,761399768 |
| A_23_P148609   | NM_021796       | PLAC1        | placenta-specific 1                                        | ENST00000476971 | -0,761452274 |
| A_23_P106973   | NM_006640       | Sep-09       | septin 9                                                   | ENST00000329047 | -0,761527224 |
| A_33_P3354607  | NM_002984       | CCL4         | chemokine (C-C motif) ligand 4                             | ENST00000250151 | -0,761800101 |
| A_23_P111583   | NM_001001547    | CD36         | CD36 molecule (thrombospondin receptor)                    | ENST00000419819 | -0,761968814 |
| A_23_P207400   | NM_007300       | BRCA1        | breast cancer 1, early onset                               | ENST00000412061 | -0,762105572 |
| A_23_P70007    | NM_012484       | HMMR         | hyaluronan-mediated motility receptor (RHAMM)              | ENST00000393915 | -0,762341367 |
| A_23_P166848   | NM_002343       | LTF          | lactotransferrin                                           | ENST00000426532 | -0,762377682 |
| A_21_P0000141  | NM_001198844    | RBM4         | RNA binding motif protein 4                                | ENST00000550837 | -0,762618034 |
| A_23_P121564   | NM_000857       | GUCY1B3      | guanylate cyclase 1, soluble, beta 3                       | ENST00000264424 | -0,76278487  |
| A_33_P3291176  | NM_001017921    | VMAC         | vimentin-type intermediate filament associated coiled-coil | ENST00000339485 | -0,762871431 |
| A_23_P104438   | NM_032578       | MYPN         | myopalladin                                                | ENST00000354393 | -0,762967866 |
| A_23_P67042    | NM_017947       | MOCOS        | molybdenum cofactor sulfurase                              | ENST00000261326 | -0,763090511 |
| A_23_P58321    | NM_001237       | CCNA2        | cyclin A2                                                  | ENST00000274026 | -0,76309791  |
| A_21_P0014598  | ENST00000454219 | LOC730081    |                                                            | ENST00000454219 | -0,763318058 |
| A_24_P38754    | NM_018464       | CISD1        | CDGSH iron sulfur domain 1                                 | ENST00000333926 | -0,763580043 |
| A_23_P21485    | NM_017933       | PID1         | phosphotyrosine interaction domain containing 1            | ENST00000392055 | -0,7636266   |
| A_33_P3281572  | NR_002174       | CMAHP        | cytidine monophospho-N-acetylneuraminic acid hydroxylas    | ENST00000377993 | -0,763738948 |
| A_32_P152767   | NM_207371       | C10orf140    | chromosome 10 open reading frame 140                       | ENST00000449193 | -0,763767471 |
| A_33_P3318530  | NR_015364       | LOC441204    | uncharacterized LOC441204                                  |                 | -0,764016377 |
| A_23_P121564   | NM_000857       | GUCY1B3      | guanylate cyclase 1, soluble, beta 3                       | ENST00000264424 | -0,764211262 |
| A_21_P0010364  | ENST00000428765 | XLOC_014257  |                                                            | ENST00000428765 | -0,764235114 |

|                |                  |                |                                                         |                 |              |
|----------------|------------------|----------------|---------------------------------------------------------|-----------------|--------------|
| A_23_P314145   | NM_005715        | UST            | uronyl-2-sulfotransferase                               | ENST00000367463 | -0,764263826 |
| A_19_P00328832 | NR_026961        | LOC284837      | uncharacterized LOC284837                               | ENST00000400385 | -0,764418626 |
| A_23_P151368   | NM_174928        | N6AMT2         | N-6 adenine-specific DNA methyltransferase 2 (putative) | ENST00000382754 | -0,764512682 |
| A_33_P3399228  | NM_032808        | LINGO1         | leucine rich repeat and Ig domain containing 1          | ENST00000355300 | -0,764653175 |
| A_23_P138194   | NM_000433        | NCF2           | neutrophil cytosolic factor 2                           | ENST00000392014 | -0,764660614 |
| A_33_P3276100  | NR_027336        | LOC100130015   | 5-hydroxyisourate hydrolase pseudogene                  | ENST00000409768 | -0,764766007 |
| A_23_P106973   | NM_006640        | Sep-09         | septin 9                                                | ENST00000329047 | -0,764899788 |
| A_33_P3250398  | BC025419         | CTSZ           | cathepsin Z                                             |                 | -0,764948658 |
| A_21_P0012917  | TCONS_I2_0002302 | XLOC_I2_012147 |                                                         |                 | -0,765660369 |
| A_23_P38784    | NM_014385        | SIGLEC7        | sialic acid binding Ig-like lectin 7                    | ENST00000317643 | -0,765851071 |
| A_23_P105562   | NM_000552        | VWF            | von Willebrand factor                                   | ENST00000261405 | -0,765923247 |
| A_32_P132860   | NR_024280        | UNQ6494        | uncharacterized LOC100129066                            |                 | -0,765980561 |
| A_32_P192970   | NM_170726        | ALDH4A1        | aldehyde dehydrogenase 4 family, member A1              | ENST00000432718 | -0,766159572 |
| A_23_P29773    | NM_014398        | LAMP3          | lysosomal-associated membrane protein 3                 | ENST00000265598 | -0,766254688 |
| A_24_P926783   | NM_001145434     | ZNF880         | zinc finger protein 880                                 | ENST00000422689 | -0,766259882 |
| A_33_P3221313  | NM_006733        | CENPI          | centromere protein I                                    | ENST00000423383 | -0,766366958 |
| A_23_P104438   | NM_032578        | MYPN           | myopalladin                                             | ENST00000354393 | -0,766472392 |
| A_23_P118246   | NM_016095        | GINS2          | GINS complex subunit 2 (Psf2 homolog)                   | ENST00000253462 | -0,766548231 |
| A_21_P0010798  | BC033943         | LOC646627      | phospholipase inhibitor                                 | ENST00000436484 | -0,766794768 |
| A_23_P106973   | NM_006640        | Sep-09         | septin 9                                                | ENST00000329047 | -0,766824103 |
| A_33_P3384871  | NM_001142522     | FBXO5          | F-box protein 5                                         | ENST00000477822 | -0,766978609 |
| A_23_P139500   | NM_030762        | BHLHE41        | basic helix-loop-helix family, member e41               | ENST00000242728 | -0,767475751 |
| A_21_P0003312  | TCONS_00007354   | XLOC_003400    |                                                         |                 | -0,767917991 |
| A_23_P106973   | NM_006640        | Sep-09         | septin 9                                                | ENST00000329047 | -0,768190274 |
| A_24_P89457    | NM_078467        | CDKN1A         | cyclin-dependent kinase inhibitor 1A (p21, Cip1)        | ENST00000478800 | -0,768227529 |
| A_24_P202139   | NM_016025        | METTL9         | methyltransferase like 9                                | ENST00000540294 | -0,768610849 |
| A_23_P58407    | NM_001076        | UGT2B15        | UDP glucuronosyltransferase 2 family, polypeptide B15   | ENST00000338206 | -0,769137601 |
| A_19_P00331853 | NR_034089        | LOC100131564   | uncharacterized LOC100131564                            |                 | -0,769231582 |
| A_33_P3309289  | AK021929         | ST3GAL4        | ST3 beta-galactoside alpha-2,3-sialyltransferase 4      |                 | -0,76956782  |

|               |              |              |                                                               |                 |              |
|---------------|--------------|--------------|---------------------------------------------------------------|-----------------|--------------|
| A_23_P106973  | NM_006640    | Sep-09       | septin 9                                                      | ENST00000329047 | -0,769843141 |
| A_32_P79434   | NM_002847    | PTPRN2       | protein tyrosine phosphatase, receptor type, N polypeptide    | ENST00000389418 | -0,769965524 |
| A_23_P42004   | NM_033125    | SLC22A16     | solute carrier family 22 (organic cation/carnitine transporte | ENST00000330550 | -0,770004597 |
| A_21_P0001779 | XR_109926    | LOC100506286 | uncharacterized LOC100506286                                  |                 | -0,770033182 |
| A_24_P324314  | NM_001008529 | MXRA7        | matrix-remodelling associated 7                               | ENST00000375036 | -0,770093527 |
| A_23_P106973  | NM_006640    | Sep-09       | septin 9                                                      | ENST00000329047 | -0,770328074 |
| A_33_P3403598 | NM_001080825 | TMEM120B     | transmembrane protein 120B                                    | ENST00000333310 | -0,770344881 |
| A_23_P41487   | NM_015130    | TBC1D9       | TBC1 domain family, member 9 (with GRAM domain)               | ENST00000442267 | -0,770566395 |
| A_23_P152782  | NM_005533    | IFI35        | interferon-induced protein 35                                 | ENST00000538473 | -0,770704498 |
| A_23_P50928   | NM_182528    | C1QL2        | complement component 1, q subcomponent-like 2                 | ENST00000272520 | -0,770799527 |
| A_23_P161218  | NM_014391    | ANKRD1       | ankyrin repeat domain 1 (cardiac muscle)                      | ENST00000371697 | -0,770858586 |
| A_23_P36397   | NM_000785    | CYP27B1      | cytochrome P450, family 27, subfamily B, polypeptide 1        | ENST00000228606 | -0,770882839 |
| A_23_P206359  | NM_004360    | CDH1         | cadherin 1, type 1, E-cadherin (epithelial)                   | ENST00000261769 | -0,77106309  |
| A_23_P253791  | NM_004345    | CAMP         | cathelicidin antimicrobial peptide                            | ENST00000296435 | -0,771137033 |
| A_33_P3242503 | NM_199451    | ZNF365       | zinc finger protein 365                                       | ENST00000410046 | -0,771654916 |
| A_23_P421401  | NM_002609    | PDGFRB       | platelet-derived growth factor receptor, beta polypeptide     | ENST00000544453 | -0,772362411 |
| A_21_P0000568 | NR_028471    | LOC644649    | apolipoprotein O pseudogene                                   |                 | -0,772520937 |
| A_33_P3240018 | NM_000922    | PDE3B        | phosphodiesterase 3B, cGMP-inhibited                          | ENST00000282096 | -0,772556326 |
| A_23_P113393  | NM_017413    | APLN         | apelin                                                        | ENST00000307484 | -0,773217026 |
| A_24_P158089  | NM_000602    | SERPINE1     | serpin peptidase inhibitor, clade E (nexin, plasminogen activ | ENST00000445463 | -0,773583964 |
| A_23_P111583  | NM_001001547 | CD36         | CD36 molecule (thrombospondin receptor)                       | ENST00000419819 | -0,773788731 |
| A_23_P11201   | NM_001097579 | GPR34        | G protein-coupled receptor 34                                 | ENST00000535368 | -0,774309663 |
| A_23_P23048   | NM_002965    | S100A9       | S100 calcium binding protein A9                               | ENST00000368738 | -0,774496182 |
| A_24_P928052  | NM_003873    | NRP1         | neuropilin 1                                                  | ENST00000374867 | -0,77475335  |
| A_23_P126593  | NM_005620    | S100A11      | S100 calcium binding protein A11                              | ENST00000271638 | -0,774834765 |
| A_23_P134854  | NM_194284    | CLDN23       | claudin 23                                                    | ENST00000519106 | -0,774840047 |
| A_23_P112004  | NM_012472    | LRRC6        | leucine rich repeat containing 6                              | ENST00000395414 | -0,774967445 |
| A_23_P253321  | NM_006228    | PNOG         | prepronociceptin                                              | ENST00000301908 | -0,775112962 |
| A_23_P117662  | NM_002112    | HDC          | histidine decarboxylase                                       | ENST00000267845 | -0,775247602 |

|               |                 |              |                                                                                     |                 |              |
|---------------|-----------------|--------------|-------------------------------------------------------------------------------------|-----------------|--------------|
| A_33_P3340752 | XR_132784       | LOC100130887 | uncharacterized LOC100130887                                                        | ENST00000437593 | -0,775402046 |
| A_33_P3240552 | ENST00000509355 | PDE4D        | phosphodiesterase 4D, cAMP-specific                                                 | ENST00000509355 | -0,775646166 |
| A_21_P0000575 | NR_029193       | LOC100287216 | uncharacterized LOC100287216                                                        |                 | -0,775864917 |
| A_23_P106973  | NM_006640       | Sep-09       | septin 9                                                                            | ENST00000329047 | -0,775965424 |
| A_33_P3355230 | NM_002287       | LAIR1        | leukocyte-associated immunoglobulin-like receptor 1                                 | ENST00000313038 | -0,776014344 |
| A_24_P158089  | NM_000602       | SERPINE1     | serpin peptidase inhibitor, clade E (nexin, plasminogen activator inhibitor type 1) | ENST00000445463 | -0,776223666 |
| A_23_P103486  | NM_000775       | CYP2J2       | cytochrome P450, family 2, subfamily J, polypeptide 2                               | ENST00000469406 | -0,77638163  |
| A_23_P111583  | NM_001001547    | CD36         | CD36 molecule (thrombospondin receptor)                                             | ENST00000419819 | -0,776694809 |
| A_23_P106973  | NM_006640       | Sep-09       | septin 9                                                                            | ENST00000329047 | -0,77672363  |
| A_23_P11841   | NM_001684       | ATP2B4       | ATPase, Ca <sup>++</sup> transporting, plasma membrane 4                            | ENST00000341360 | -0,776826514 |
| A_33_P3407256 | NM_001166260    | TRIP13       | thyroid hormone receptor interactor 13                                              | ENST00000512024 | -0,777048946 |
| A_24_P151582  | NM_003216       | TEF          | thyrotrophic embryonic factor                                                       | ENST00000266304 | -0,77708792  |
| A_23_P64617   | NM_012193       | FZD4         | frizzled family receptor 4                                                          | ENST00000531380 | -0,777124902 |
| A_23_P111583  | NM_001001547    | CD36         | CD36 molecule (thrombospondin receptor)                                             | ENST00000419819 | -0,777557076 |
| A_33_P3376636 | NM_001017989    | OPA3         | optic atrophy 3 (autosomal recessive, with chorea and spastic paraparesis)          | ENST00000323060 | -0,777663723 |
| A_23_P118834  | NM_001067       | TOP2A        | topoisomerase (DNA) II alpha 170kDa                                                 | ENST00000269577 | -0,777675544 |
| A_23_P10647   | NM_018659       | CYTL1        | cytokine-like 1                                                                     | ENST00000307746 | -0,777679037 |
| A_33_P3304372 | NM_018342       | TMEM144      | transmembrane protein 144                                                           | ENST00000511532 | -0,777907031 |
| A_23_P165136  | NM_145256       | LRRC25       | leucine rich repeat containing 25                                                   | ENST00000339007 | -0,77812632  |
| A_23_P104876  | NM_017425       | SPA17        | sperm autoantigenic protein 17                                                      | ENST00000524614 | -0,778144051 |
| A_23_P113393  | NM_017413       | APLN         | apelin                                                                              | ENST00000307484 | -0,778295006 |
| A_23_P105794  | NM_033255       | EPSTI1       | epithelial stromal interaction 1 (breast)                                           | ENST00000476830 | -0,778386115 |
| A_21_P0014653 | XR_110911       | LOC100507521 | uncharacterized LOC100507521                                                        | ENST00000524942 | -0,778414192 |
| A_32_P165116  | NM_138458       | WDR92        | WD repeat domain 92                                                                 | ENST00000406334 | -0,779517668 |
| A_23_P11841   | NM_001684       | ATP2B4       | ATPase, Ca <sup>++</sup> transporting, plasma membrane 4                            | ENST00000341360 | -0,779698512 |
| A_23_P308722  | NM_145038       | CCDC164      | coiled-coil domain containing 164                                                   | ENST00000288710 | -0,780046824 |
| A_23_P120467  | NM_199427       | ZFP64        | zinc finger protein 64 homolog (mouse)                                              | ENST00000361387 | -0,780069015 |
| A_23_P12082   | NM_001025199    | CHI3L2       | chitinase 3-like 2                                                                  | ENST00000369748 | -0,780490307 |
| A_23_P106973  | NM_006640       | Sep-09       | septin 9                                                                            | ENST00000329047 | -0,780676239 |



|                |              |              |                                                                 |                 |              |
|----------------|--------------|--------------|-----------------------------------------------------------------|-----------------|--------------|
| A_23_P345220   | NM_014631    | SH3PXD2A     | SH3 and PX domains 2A                                           | ENST00000315994 | -0,780776551 |
| A_23_P38795    | NM_002029    | FPR1         | formyl peptide receptor 1                                       | ENST00000304748 | -0,780825092 |
| A_33_P3315134  | NR_026597    | DIRC3        | disrupted in renal carcinoma 3                                  | ENST00000474063 | -0,780852322 |
| A_23_P80974    | NM_005651    | TDO2         | tryptophan 2,3-dioxygenase                                      | ENST00000510293 | -0,781233861 |
| A_23_P79108    | NM_138813    | ATP8B3       | ATPase, aminophospholipid transporter, class I, type 8B, me     | ENST00000531925 | -0,781250891 |
| A_23_P1014     | NR_026761    | LINC00467    | long intergenic non-protein coding RNA 467                      |                 | -0,781597649 |
| A_23_P77590    | NM_018052    | VAC14        | Vac14 homolog ( <i>S. cerevisiae</i> )                          | ENST00000536184 | -0,781763066 |
| A_23_P111583   | NM_001001547 | CD36         | CD36 molecule (thrombospondin receptor)                         | ENST00000419819 | -0,781802121 |
| A_23_P126649   | NM_024554    | PGBD5        | piggyBac transposable element derived 5                         | ENST00000321327 | -0,781892594 |
| A_21_P0000893  | NR_040051    | LOC100506686 | uncharacterized LOC100506686                                    |                 | -0,781902175 |
| A_19_P00315651 | XR_132670    | LOC100652730 | uncharacterized LOC100652730                                    | ENST00000412500 | -0,782266867 |
| A_24_P169013   | NR_001298    | HLA-DRB6     | major histocompatibility complex, class II, DR beta 6 (pseud    | ENST00000437183 | -0,7826012   |
| A_23_P41194    | NM_153353    | LRRC34       | leucine rich repeat containing 34                               | ENST00000522329 | -0,782620193 |
| A_23_P1014     | NR_026761    | LINC00467    | long intergenic non-protein coding RNA 467                      |                 | -0,782769825 |
| A_33_P3374205  | NM_002417    | MKI67        | antigen identified by monoclonal antibody Ki-67                 | ENST00000537609 | -0,783650366 |
| A_23_P334173   | NM_002349    | LY75         | lymphocyte antigen 75                                           | ENST00000263636 | -0,783666937 |
| A_23_P111583   | NM_001001547 | CD36         | CD36 molecule (thrombospondin receptor)                         | ENST00000419819 | -0,783726275 |
| A_33_P3372466  | NM_138501    | TECR         | trans-2,3-enoyl-CoA reductase                                   | ENST00000444365 | -0,783915322 |
| A_23_P58321    | NM_001237    | CCNA2        | cyclin A2                                                       | ENST00000274026 | -0,784096711 |
| A_21_P0000727  | NR_038216    | LOC154092    | uncharacterized LOC154092                                       | ENST00000456749 | -0,784221835 |
| A_24_P215765   | NM_024490    | ATP10A       | ATPase, class V, type 10A                                       | ENST00000555815 | -0,78452701  |
| A_23_P24493    | NM_002424    | MMP8         | matrix metalloproteinase 8 (neutrophil collagenase)             | ENST00000528662 | -0,784884907 |
| A_24_P387609   | NM_030940    | ISCA1        | iron-sulfur cluster assembly 1 homolog ( <i>S. cerevisiae</i> ) | ENST00000375991 | -0,785282587 |
| A_23_P58321    | NM_001237    | CCNA2        | cyclin A2                                                       | ENST00000274026 | -0,785936679 |
| A_23_P111583   | NM_001001547 | CD36         | CD36 molecule (thrombospondin receptor)                         | ENST00000419819 | -0,786194286 |
| A_23_P49539    | NM_001080519 | BAHCC1       | BAH domain and coiled-coil containing 1                         | ENST00000307745 | -0,786220123 |
| A_23_P105794   | NM_033255    | EPSTI1       | epithelial stromal interaction 1 (breast)                       | ENST00000476830 | -0,786220451 |
| A_23_P7896     | NM_020185    | DUSP22       | dual specificity phosphatase 22                                 | ENST00000344450 | -0,786307352 |
| A_33_P3370449  | NM_152413    | GOT1L1       | glutamic-oxaloacetic transaminase 1-like 1                      | ENST00000307599 | -0,786350054 |

|                |                 |                |                                                              |                 |              |
|----------------|-----------------|----------------|--------------------------------------------------------------|-----------------|--------------|
| A_24_P135769   | NM_198315       | VWA5A          | von Willebrand factor A domain containing 5A                 | ENST00000449321 | -0,786454074 |
| A_33_P3222917  | NM_001024736    | CD276          | CD276 molecule                                               | ENST00000318443 | -0,786475379 |
| A_23_P97860    | NM_000235       | LIPA           | lipase A, lysosomal acid, cholesterol esterase               | ENST00000425287 | -0,78662312  |
| A_24_P295010   | NM_004155       | SERPINB9       | serpin peptidase inhibitor, clade B (ovalbumin), member 9    | ENST00000380698 | -0,786768069 |
| A_33_P3369567  | NM_001242932    | LSP1           | lymphocyte-specific protein 1                                | ENST00000484895 | -0,786960832 |
| A_32_P74409    | NM_001145033    | C11orf96       | chromosome 11 open reading frame 96                          | ENST00000528572 | -0,787132642 |
| A_33_P3223002  | NM_018485       | GPR77          | G protein-coupled receptor 77                                | ENST00000257267 | -0,787253309 |
| A_23_P112554   | NM_001855       | COL15A1        | collagen, type XV, alpha 1                                   | ENST00000375001 | -0,787352023 |
| A_33_P3398597  | NM_133180       | EPS8L1         | EPS8-like 1                                                  | ENST00000310075 | -0,787598436 |
| A_24_P197964   | NM_014788       | TRIM14         | tripartite motif containing 14                               | ENST00000341469 | -0,787883762 |
| A_33_P3376971  | NM_024111       | CHAC1          | ChaC, cation transport regulator homolog 1 (E. coli)         | ENST00000446533 | -0,788056859 |
| A_33_P3402565  | NM_004415       | DSP            | desmoplakin                                                  | ENST00000397483 | -0,78835446  |
| A_23_P334664   | NM_033247       | PML            | promyelocytic leukemia                                       | ENST00000395132 | -0,788428856 |
| A_23_P139864   | NM_031289       | GSG1           | germ cell associated 1                                       | ENST00000351606 | -0,788674056 |
| A_23_P329261   | NM_000891       | KCNJ2          | potassium inwardly-rectifying channel, subfamily J, member 2 | ENST00000243457 | -0,788764208 |
| A_23_P11201    | NM_001097579    | GPR34          | G protein-coupled receptor 34                                | ENST00000535368 | -0,788767154 |
| A_33_P3259890  | NR_033932       | FLJ35946       | uncharacterized protein FLJ35946                             | ENST00000515003 | -0,789296904 |
| A_33_P3217393  | NM_001024736    | CD276          | CD276 molecule                                               | ENST00000379823 | -0,789421516 |
| A_23_P111583   | NM_001001547    | CD36           | CD36 molecule (thrombospondin receptor)                      | ENST00000419819 | -0,789503498 |
| A_24_P106794   | NM_032869       | NUDCD1         | NudC domain containing 1                                     | ENST00000239690 | -0,789521224 |
| A_23_P80032    | NM_005225       | E2F1           | E2F transcription factor 1                                   | ENST00000343380 | -0,789584377 |
| A_23_P206359   | NM_004360       | CDH1           | cadherin 1, type 1, E-cadherin (epithelial)                  | ENST00000261769 | -0,789828311 |
| A_21_P0012804  | ENST00000509161 | XLOC_l2_011291 |                                                              | ENST00000509161 | -0,790314659 |
| A_23_P425752   | NM_033219       | TRIM14         | tripartite motif containing 14                               | ENST00000342043 | -0,790942458 |
| A_23_P112846   | NM_001144978    | MTHFD2L        | methylenetetrahydrofolate dehydrogenase (NADP+ dependent)    | ENST00000492183 | -0,791056606 |
| A_19_P00322314 | ENST00000514050 | XLOC_l2_011173 |                                                              | ENST00000514050 | -0,791610259 |
| A_33_P3369336  | NM_002054       | GCG            | glucagon                                                     | ENST00000375497 | -0,791662853 |
| A_33_P3232960  | NM_001010870    | TDRD6          | tudor domain containing 6                                    | ENST00000544460 | -0,791853854 |
| A_33_P3266863  | NM_024587       | TMEM53         | transmembrane protein 53                                     | ENST00000372237 | -0,792130893 |

|               |                 |              |                                                        |                 |              |
|---------------|-----------------|--------------|--------------------------------------------------------|-----------------|--------------|
| A_23_P31921   | NM_000050       | ASS1         | argininosuccinate synthase 1                           | ENST00000422569 | -0,79244726  |
| A_23_P390726  | NM_144725       | TTC23L       | tetratricopeptide repeat domain 23-like                | ENST00000514080 | -0,792602294 |
| A_23_P138881  | NM_001104       | ACTN3        | actinin, alpha 3                                       | ENST00000502692 | -0,792721629 |
| A_23_P104876  | NM_017425       | SPA17        | sperm autoantigenic protein 17                         | ENST00000524614 | -0,792974864 |
| A_33_P3270668 | NM_001031690    | FAM131B      | family with sequence similarity 131, member B          | ENST00000409222 | -0,793250612 |
| A_33_P3265404 | NR_026994       | LOC340094    | uncharacterized LOC340094                              | ENST00000508201 | -0,793462297 |
| A_21_P0001647 | ENST00000549744 | XLOC_001266  |                                                        | ENST00000549744 | -0,793820246 |
| A_23_P71530   | NM_002546       | TNFRSF11B    | tumor necrosis factor receptor superfamily, member 11b | ENST00000521597 | -0,793887964 |
| A_23_P110184  | NM_006745       | MSMO1        | methylsterol monooxygenase 1                           | ENST00000393766 | -0,794085135 |
| A_23_P120467  | NM_199427       | ZFP64        | zinc finger protein 64 homolog (mouse)                 | ENST00000361387 | -0,794101299 |
| A_23_P110184  | NM_006745       | MSMO1        | methylsterol monooxygenase 1                           | ENST00000393766 | -0,79414009  |
| A_23_P819     | NM_005101       | ISG15        | ISG15 ubiquitin-like modifier                          | ENST00000379389 | -0,794472888 |
| A_23_P399078  | NM_000362       | TIMP3        | TIMP metalloproteinase inhibitor 3                     | ENST00000266085 | -0,794647767 |
| A_21_P0006239 | XR_109854       | LOC100506532 | uncharacterized LOC100506532                           |                 | -0,794815615 |
| A_33_P3389023 | NM_024592       | SRD5A3       | steroid 5 alpha-reductase 3                            | ENST00000264228 | -0,794938308 |
| A_23_P40453   | NM_001236       | CBR3         | carbonyl reductase 3                                   | ENST00000290354 | -0,795501105 |
| A_24_P158718  | NM_015177       | DTX4         | deltex homolog 4 (Drosophila)                          | ENST00000227451 | -0,795781573 |
| A_21_P0001680 | TCONS_00002039  | XLOC_000208  |                                                        |                 | -0,795845033 |
| A_23_P137931  | NM_000677       | ADORA3       | adenosine A3 receptor                                  | ENST00000241356 | -0,796165667 |
| A_23_P122924  | NM_002192       | INHBA        | inhibin, beta A                                        | ENST00000442711 | -0,796367064 |
| A_23_P361584  | NM_152680       | TMEM154      | transmembrane protein 154                              | ENST00000304385 | -0,796740598 |
| A_23_P354288  | NM_153606       | FAM71A       | family with sequence similarity 71, member A           | ENST00000545975 | -0,796751388 |
| A_23_P108823  | NM_032523       | OSBPL6       | oxysterol binding protein-like 6                       | ENST00000315022 | -0,796784725 |
| A_21_P0004612 | BC038196        | XLOC_005773  |                                                        | ENST00000441949 | -0,796970185 |
| A_24_P60441   | NM_153717       | EVC          | Ellis van Creveld syndrome                             | ENST00000264956 | -0,797104085 |
| A_23_P1014    | NR_026761       | LINC00467    | long intergenic non-protein coding RNA 467             |                 | -0,797247345 |
| A_23_P111583  | NM_001001547    | CD36         | CD36 molecule (thrombospondin receptor)                | ENST00000419819 | -0,798001756 |
| A_23_P154605  | NM_018837       | SULF2        | sulfatase 2                                            | ENST00000467815 | -0,798442102 |
| A_24_P237443  | NM_018990       | SASH3        | SAM and SH3 domain containing 3                        | ENST00000356892 | -0,798748795 |

|                |                 |              |                                                              |                 |              |
|----------------|-----------------|--------------|--------------------------------------------------------------|-----------------|--------------|
| A_33_P3264846  | NM_152703       | SAMD9L       | sterile alpha motif domain containing 9-like                 | ENST00000394472 | -0,798778547 |
| A_23_P257649   | NM_002899       | RBP1         | retinol binding protein 1, cellular                          | ENST00000232219 | -0,798961988 |
| A_23_P372848   | NM_002558       | P2RX1        | purinergic receptor P2X, ligand-gated ion channel, 1         | ENST00000225538 | -0,799149007 |
| A_23_P256956   | NM_005733       | KIF20A       | kinesin family member 20A                                    | ENST00000502338 | -0,79939954  |
| A_23_P105794   | NM_033255       | EPSTI1       | epithelial stromal interaction 1 (breast)                    | ENST00000476830 | -0,79945095  |
| A_21_P0000091  | NM_001172780    | LRRC34       | leucine rich repeat containing 34                            | ENST00000524327 | -0,799597704 |
| A_33_P3257027  | NM_002009       | FGF7         | fibroblast growth factor 7                                   | ENST00000377614 | -0,799611991 |
| A_23_P111583   | NM_001001547    | CD36         | CD36 molecule (thrombospondin receptor)                      | ENST00000419819 | -0,79978969  |
| A_23_P393727   | NM_201266       | NRP2         | neuropilin 2                                                 | ENST00000540841 | -0,799904628 |
| A_21_P0001920  | ENST00000421326 | XLOC_001692  |                                                              | ENST00000421326 | -0,800075679 |
| A_32_P62997    | NM_018492       | PBK          | PDZ binding kinase                                           | ENST00000301905 | -0,800210643 |
| A_21_P0001233  | ENST00000433058 | XLOC_001230  |                                                              | ENST00000433058 | -0,800289507 |
| A_21_P0014190  | XR_108779       | LOC100288594 | uncharacterized LOC100288594                                 |                 | -0,800487638 |
| A_23_P10647    | NM_018659       | CYTL1        | cytokine-like 1                                              | ENST00000307746 | -0,800718043 |
| A_23_P200829   | NM_015326       | SRGAP2       | SLIT-ROBO Rho GTPase activating protein 2                    | ENST00000295713 | -0,802391669 |
| A_23_P887      | NM_014002       | IKBKE        | inhibitor of kappa light polypeptide gene enhancer in B-cell | ENST00000537984 | -0,802876205 |
| A_21_P0006884  | TCONS_00018249  | XLOC_008527  |                                                              |                 | -0,802936841 |
| A_33_P3244610  | NM_178460       | SIRPD        | signal-regulatory protein delta                              | ENST00000381623 | -0,803300532 |
| A_19_P00319201 | NM_173463       | CCDC149      | coiled-coil domain containing 149                            | ENST00000504487 | -0,803312906 |
| A_21_P0000794  | NR_038421       | LOC731223    | uncharacterized LOC731223                                    |                 | -0,803691263 |
| A_23_P7853     | NM_007058       | CAPN11       | calpain 11                                                   | ENST00000533604 | -0,803700221 |
| A_33_P3326767  | XR_110123       | LOC100129597 | uncharacterized LOC100129597                                 |                 | -0,803846953 |
| A_23_P118834   | NM_001067       | TOP2A        | topoisomerase (DNA) II alpha 170kDa                          | ENST00000269577 | -0,804388195 |
| A_19_P00805954 | TCONS_00011660  | XLOC_005143  |                                                              |                 | -0,804571508 |
| A_23_P124190   | NM_130390       | TRIM34       | tripartite motif containing 34                               | ENST00000491385 | -0,804576348 |
| A_33_P3409477  | NM_032873       | UBASH3B      | ubiquitin associated and SH3 domain containing B             | ENST00000284273 | -0,804625831 |
| A_23_P105794   | NM_033255       | EPSTI1       | epithelial stromal interaction 1 (breast)                    | ENST00000476830 | -0,804984975 |
| A_23_P250245   | NM_001782       | CD72         | CD72 molecule                                                | ENST00000490239 | -0,805041504 |
| A_23_P113613   | NM_022842       | CDCP1        | CUB domain containing protein 1                              | ENST00000296129 | -0,805129118 |

|                |                 |                |                                                                                   |                 |              |
|----------------|-----------------|----------------|-----------------------------------------------------------------------------------|-----------------|--------------|
| A_33_P3328609  | NM_003628       | PKP4           | plakophilin 4                                                                     | ENST00000426248 | -0,805232302 |
| A_32_P405759   | NM_152888       | COL22A1        | collagen, type XXII, alpha 1                                                      | ENST00000435777 | -0,805387171 |
| A_23_P122924   | NM_002192       | INHBA          | inhibin, beta A                                                                   | ENST00000442711 | -0,806111016 |
| A_24_P914513   | NM_183050       | BCKDHB         | branched chain keto acid dehydrogenase E1, beta polypeptide                       | ENST00000320393 | -0,806393598 |
| A_23_P10647    | NM_018659       | CYTL1          | cytokine-like 1                                                                   | ENST00000307746 | -0,806605804 |
| A_33_P3348719  | NM_002010       | FGF9           | fibroblast growth factor 9 (glia-activating factor)                               | ENST00000382353 | -0,806902142 |
| A_23_P114466   | NM_033284       | TBL1Y          | transducin (beta)-like 1, Y-linked                                                | ENST00000383032 | -0,80710134  |
| A_23_P122924   | NM_002192       | INHBA          | inhibin, beta A                                                                   | ENST00000442711 | -0,807115506 |
| A_24_P317907   | NM_001034954    | SORBS1         | sorbin and SH3 domain containing 1                                                | ENST00000371247 | -0,807284711 |
| A_23_P121665   | NM_020777       | SORCS2         | sortilin-related VPS10 domain containing receptor 2                               | ENST00000507866 | -0,807511683 |
| A_21_P0007484  | NR_040245       | LOC100287314   | uncharacterized LOC100287314                                                      | ENST00000547804 | -0,808329279 |
| A_21_P0004231  | TCONS_00009878  | XLOC_004300    |                                                                                   |                 | -0,808329789 |
| A_33_P3308686  | NM_020785       | CC2D2A         | coiled-coil and C2 domain containing 2A                                           | ENST00000438599 | -0,80840615  |
| A_21_P0007881  | TCONS_00021347  | XLOC_010117    |                                                                                   |                 | -0,808491316 |
| A_19_P00318323 | NR_015410       | LINC00340      | long intergenic non-protein coding RNA 340                                        |                 | -0,808527654 |
| A_33_P3258478  | XM_003403406    | KIR3DL1        | killer cell immunoglobulin-like receptor, three domains, long cytoplasmic tail, 1 |                 | -0,808837296 |
| A_23_P163697   | NM_016524       | SYT17          | synaptotagmin XVII                                                                | ENST00000355377 | -0,808851959 |
| A_24_P148717   | NM_001295       | CCR1           | chemokine (C-C motif) receptor 1                                                  | ENST00000296140 | -0,809050125 |
| A_23_P110184   | NM_006745       | MSMO1          | methylsterol monooxygenase 1                                                      | ENST00000393766 | -0,809102534 |
| A_21_P0013601  | AK024464        | XLOC_I2_015033 |                                                                                   |                 | -0,809220332 |
| A_23_P204751   | NM_020039       | ACCN2          | amiloride-sensitive cation channel 2, neuronal                                    | ENST00000228468 | -0,809345599 |
| A_23_P58321    | NM_001237       | CCNA2          | cyclin A2                                                                         | ENST00000274026 | -0,809469484 |
| A_23_P122924   | NM_002192       | INHBA          | inhibin, beta A                                                                   | ENST00000442711 | -0,809838136 |
| A_33_P3251552  | NM_001029871    | RSPO4          | R-spondin 4                                                                       | ENST00000217260 | -0,810065242 |
| A_21_P0010706  | ENST00000447329 | XLOC_I2_000233 |                                                                                   | ENST00000447329 | -0,810092093 |
| A_23_P3956     | NM_198594       | C1QTNF1        | C1q and tumor necrosis factor related protein 1                                   | ENST00000339142 | -0,810280062 |
| A_19_P00801945 | NR_015364       | LOC441204      | uncharacterized LOC441204                                                         |                 | -0,810408558 |
| A_23_P122924   | NM_002192       | INHBA          | inhibin, beta A                                                                   | ENST00000442711 | -0,810536736 |
| A_23_P122924   | NM_002192       | INHBA          | inhibin, beta A                                                                   | ENST00000442711 | -0,810982186 |



|               |                 |              |                                                                |                 |              |
|---------------|-----------------|--------------|----------------------------------------------------------------|-----------------|--------------|
| A_23_P147918  | NM_080388       | S100A16      | S100 calcium binding protein A16                               | ENST00000368703 | -0,811172245 |
| A_23_P122924  | NM_002192       | INHBA        | inhibin, beta A                                                | ENST00000442711 | -0,811874279 |
| A_21_P0014693 | ENST00000451775 | LOC100506847 |                                                                | ENST00000451775 | -0,812333094 |
| A_21_P0014077 | NR_040772       | LOC100505666 | uncharacterized LOC100505666                                   | ENST00000452962 | -0,812512    |
| A_33_P3411427 | NM_001129730    | ZNF837       | zinc finger protein 837                                        | ENST00000427624 | -0,812549654 |
| A_21_P0001290 | ENST00000429328 | XLOC_000175  |                                                                | ENST00000429328 | -0,812570208 |
| A_33_P3213707 | NM_025239       | PDCD1LG2     | programmed cell death 1 ligand 2                               | ENST00000397745 | -0,812630789 |
| A_33_P3213665 | NR_038385       | LOC728084    | uncharacterized LOC728084                                      |                 | -0,813134598 |
| A_23_P139669  | NM_006931       | SLC2A3       | solute carrier family 2 (facilitated glucose transporter), men | ENST00000479059 | -0,814194255 |
| A_33_P3277373 | NM_020530       | OSM          | oncostatin M                                                   | ENST00000215781 | -0,815183734 |
| A_23_P334955  | NM_053279       | FAM167A      | family with sequence similarity 167, member A                  | ENST00000284486 | -0,815502145 |
| A_21_P0003110 | THC2659360      | XLOC_003077  |                                                                |                 | -0,815749085 |
| A_23_P118834  | NM_001067       | TOP2A        | topoisomerase (DNA) II alpha 170kDa                            | ENST00000269577 | -0,816085582 |
| A_33_P3392892 | NM_017886       | ULK4         | unc-51-like kinase 4 (C. elegans)                              | ENST00000301831 | -0,816806875 |
| A_23_P122924  | NM_002192       | INHBA        | inhibin, beta A                                                | ENST00000442711 | -0,817326945 |
| A_24_P279489  | NM_001128159    | VPS53        | vacuolar protein sorting 53 homolog (S. cerevisiae)            | ENST00000437048 | -0,8173797   |
| A_24_P7594    | NM_030641       | APOL6        | apolipoprotein L, 6                                            |                 | -0,817954693 |
| A_33_P3240328 | NM_002653       | PITX1        | paired-like homeodomain 1                                      | ENST00000265340 | -0,818055495 |
| A_23_P89780   | NM_198129       | LAMA3        | laminin, alpha 3                                               | ENST00000416669 | -0,818117257 |
| A_33_P3259092 | NM_001079802    | FKTN         | fukutin                                                        | ENST00000457847 | -0,818738762 |
| A_23_P415401  | NM_001206       | KLF9         | Kruppel-like factor 9                                          | ENST00000377126 | -0,819070686 |
| A_24_P250922  | NM_000963       | PTGS2        | prostaglandin-endoperoxide synthase 2 (prostaglandin G/H       | ENST00000490885 | -0,819613962 |
| A_24_P376047  | NM_004917       | KLK4         | kallikrein-related peptidase 4                                 | ENST00000431178 | -0,819672044 |
| A_21_P0003409 | ENST00000515860 | XLOC_003709  |                                                                | ENST00000515860 | -0,819691353 |
| A_23_P122924  | NM_002192       | INHBA        | inhibin, beta A                                                | ENST00000442711 | -0,819958932 |
| A_23_P42882   | NM_172082       | CAMK2B       | calcium/calmodulin-dependent protein kinase II beta            | ENST00000395747 | -0,820075928 |
| A_23_P108823  | NM_032523       | OSBPL6       | oxysterol binding protein-like 6                               | ENST00000315022 | -0,82017592  |
| A_23_P103617  | NM_003568       | ANXA9        | annexin A9                                                     | ENST00000368947 | -0,82021356  |
| A_23_P1014    | NR_026761       | LINC00467    | long intergenic non-protein coding RNA 467                     |                 | -0,820341409 |

|               |                 |              |                                                              |                 |              |
|---------------|-----------------|--------------|--------------------------------------------------------------|-----------------|--------------|
| A_23_P93431   | NM_016108       | AIG1         | androgen-induced 1                                           | ENST00000357847 | -0,820802805 |
| A_21_P0011496 | NM_001025195    | CES1         | carboxylesterase 1                                           | ENST00000360526 | -0,821374165 |
| A_23_P258612  | NM_016529       | ATP8A2       | ATPase, aminophospholipid transporter, class I, type 8A, m   | ENST00000544544 | -0,821512588 |
| A_23_P105562  | NM_000552       | VWF          | von Willebrand factor                                        | ENST00000261405 | -0,821848709 |
| A_21_P0001003 | ENST00000420156 | XLOC_000352  |                                                              | ENST00000420156 | -0,821904477 |
| A_24_P335305  | NM_006187       | OAS3         | 2'-5'-oligoadenylate synthetase 3, 100kDa                    | ENST00000323881 | -0,822189331 |
| A_23_P432573  | NM_145015       | MRGPRF       | MAS-related GPR, member F                                    | ENST00000309099 | -0,822261504 |
| A_32_P4018    | ENST00000371079 | ROR1         | receptor tyrosine kinase-like orphan receptor 1              | ENST00000371079 | -0,8222936   |
| A_21_P0001330 | TCONS_00001012  | XLOC_000278  |                                                              |                 | -0,823156229 |
| A_33_P3276323 | NR_033886       | RAD21-AS1    | RAD21 antisense RNA 1 (non-protein coding)                   | ENST00000521487 | -0,823415017 |
| A_24_P236235  | NM_013231       | FLRT2        | fibronectin leucine rich transmembrane protein 2             | ENST00000330753 | -0,823444119 |
| A_21_P0011069 | XR_109143       | LOC100506691 | uncharacterized LOC100506691                                 |                 | -0,823446548 |
| A_33_P3344399 | NM_001199017    | LRRC49       | leucine rich repeat containing 49                            | ENST00000436542 | -0,823944286 |
| A_23_P122924  | NM_002192       | INHBA        | inhibin, beta A                                              | ENST00000442711 | -0,824252479 |
| A_21_P0006100 | THC2666038      | XLOC_007820  |                                                              |                 | -0,824405046 |
| A_23_P218770  | NM_002872       | RAC2         | ras-related C3 botulinum toxin substrate 2 (rho family, smal | ENST00000249071 | -0,824455129 |
| A_24_P117410  | NM_138433       | KLHDC7B      | kelch domain containing 7B                                   | ENST00000395676 | -0,824850484 |
| A_23_P112554  | NM_001855       | COL15A1      | collagen, type XV, alpha 1                                   | ENST00000375001 | -0,825440212 |
| A_33_P3385957 | NM_012263       | TTL1         | tubulin tyrosine ligase-like family, member 1                | ENST00000440761 | -0,825508764 |
| A_23_P118     | NM_001439       | EXTL2        | exostoses (multiple)-like 2                                  | ENST00000370114 | -0,825528586 |
| A_23_P403991  | NM_024080       | TRPM8        | transient receptor potential cation channel, subfamily M, m  | ENST00000324695 | -0,825606607 |
| A_23_P114466  | NM_033284       | TBL1Y        | transducin (beta)-like 1, Y-linked                           | ENST00000383032 | -0,826192221 |
| A_33_P3424067 | NM_017635       | SUV420H1     | suppressor of variegation 4-20 homolog 1 (Drosophila)        | ENST00000304363 | -0,826214553 |
| A_23_P302550  | NM_130782       | RGS18        | regulator of G-protein signaling 18                          | ENST00000367460 | -0,826763553 |
| A_21_P0003276 | TCONS_00007086  | XLOC_003007  |                                                              |                 | -0,827360869 |
| A_23_P434809  | NM_002964       | S100A8       | S100 calcium binding protein A8                              | ENST00000368733 | -0,827366595 |
| A_23_P38468   | NM_014604       | TAX1BP3      | Tax1 (human T-cell leukemia virus type I) binding protein 3  | ENST00000550383 | -0,82781775  |
| A_23_P103511  | NM_001085375    | C1orf226     | chromosome 1 open reading frame 226                          | ENST00000458626 | -0,828557294 |
| A_23_P10647   | NM_018659       | CYTL1        | cytokine-like 1                                              | ENST00000307746 | -0,828584975 |

|                |                 |              |                                                          |                 |              |
|----------------|-----------------|--------------|----------------------------------------------------------|-----------------|--------------|
| A_23_P94030    | NM_002291       | LAMB1        | laminin, beta 1                                          | ENST00000222399 | -0,828871293 |
| A_21_P0014444  | XR_109837       | LOC100507639 | uncharacterized LOC100507639                             |                 | -0,829058764 |
| A_23_P60146    | NM_006207       | PDGFR1       | platelet-derived growth factor receptor-like             | ENST00000251630 | -0,829637811 |
| A_33_P3373459  | NM_018641       | CHST12       | carbohydrate (chondroitin 4) sulfotransferase 12         | ENST00000258711 | -0,830024972 |
| A_23_P104438   | NM_032578       | MYPN         | myopalladin                                              | ENST00000354393 | -0,830196462 |
| A_33_P3322999  | NM_001164375    | C10orf105    | chromosome 10 open reading frame 105                     | ENST00000398786 | -0,830206528 |
| A_21_P0014410  | ENST00000442637 | LOC100507459 |                                                          | ENST00000442637 | -0,830622519 |
| A_33_P3423445  | ENST00000327867 | ZNF730       | zinc finger protein 730                                  | ENST00000327867 | -0,830709234 |
| A_24_P377499   | NM_015550       | OSBPL3       | oxysterol binding protein-like 3                         | ENST00000352860 | -0,830908205 |
| A_21_P0006726  | ENST00000418372 | XLOC_008700  |                                                          | ENST00000418372 | -0,831077623 |
| A_23_P204847   | NM_002298       | LCP1         | lymphocyte cytosolic protein 1 (L-plastin)               | ENST00000398576 | -0,831089712 |
| A_33_P3416563  | NM_016108       | AIG1         | androgen-induced 1                                       | ENST00000344492 | -0,831174523 |
| A_33_P3565787  | NR_027329       | KIAA1908     | uncharacterized LOC114796                                |                 | -0,831652062 |
| A_21_P0010671  | NR_038845       | LOC643723    | uncharacterized LOC643723                                |                 | -0,831669591 |
| A_23_P105562   | NM_000552       | VWF          | von Willebrand factor                                    | ENST00000261405 | -0,832032592 |
| A_23_P104876   | NM_017425       | SPA17        | sperm autoantigenic protein 17                           | ENST00000524614 | -0,832341759 |
| A_32_P180958   | NM_016297       | PCYOX1       | prenylcysteine oxidase 1                                 | ENST00000433351 | -0,83250155  |
| A_21_P0005154  | TCONS_00012648  | XLOC_005589  |                                                          |                 | -0,832682791 |
| A_23_P105562   | NM_000552       | VWF          | von Willebrand factor                                    | ENST00000261405 | -0,833366255 |
| A_19_P00319981 | ENST00000436710 | LOC100506119 |                                                          | ENST00000436710 | -0,833973509 |
| A_23_P129717   | NM_080663       | ERI2         | ERI1 exoribonuclease family member 2                     | ENST00000300005 | -0,834066804 |
| A_21_P0000769  | NR_038332       | LOC100505622 | uncharacterized LOC100505622                             |                 | -0,834182317 |
| A_23_P17053    | NM_019618       | IL36G        | interleukin 36, gamma                                    | ENST00000259205 | -0,834515767 |
| A_23_P114466   | NM_033284       | TBL1Y        | transducin (beta)-like 1, Y-linked                       | ENST00000383032 | -0,834795005 |
| A_23_P147025   | NM_004794       | RAB33A       | RAB33A, member RAS oncogene family                       | ENST00000257017 | -0,834995042 |
| A_24_P944991   | NM_173829       | SREK1IP1     | SREK1-interacting protein 1                              | ENST00000513458 | -0,835442378 |
| A_23_P113613   | NM_022842       | CDCP1        | CUB domain containing protein 1                          | ENST00000296129 | -0,835639437 |
| A_24_P250922   | NM_000963       | PTGS2        | prostaglandin-endoperoxide synthase 2 (prostaglandin G/H | ENST00000490885 | -0,835722852 |
| A_23_P139635   | NM_001917       | DAO          | D-amino-acid oxidase                                     | ENST00000549215 | -0,835735749 |

|               |                   |                |                                                             |                 |  |              |
|---------------|-------------------|----------------|-------------------------------------------------------------|-----------------|--|--------------|
| A_21_P0011711 | TCONS_I2_0001269: | XLOC_I2_006813 |                                                             |                 |  | -0,835795549 |
| A_24_P71904   | NM_000860         | HPGD           | hydroxyprostaglandin dehydrogenase 15-(NAD)                 | ENST00000296522 |  | -0,836082345 |
| A_23_P120467  | NM_199427         | ZFP64          | zinc finger protein 64 homolog (mouse)                      | ENST00000361387 |  | -0,836163806 |
| A_33_P3395081 | NM_017888         | ACSM5          | acyl-CoA synthetase medium-chain family member 5            | ENST00000331849 |  | -0,836669578 |
| A_23_P259692  | NM_058179         | PSAT1          | phosphoserine aminotransferase 1                            | ENST00000376588 |  | -0,837251484 |
| A_32_P4626    | XR_108654         | LOC100505880   | uncharacterized LOC100505880                                |                 |  | -0,837797008 |
| A_33_P3211432 | NM_000265         | NCF1           | neutrophil cytosolic factor 1                               | ENST00000289473 |  | -0,837915413 |
| A_23_P120467  | NM_199427         | ZFP64          | zinc finger protein 64 homolog (mouse)                      | ENST00000361387 |  | -0,838172446 |
| A_23_P140450  | NM_003645         | SLC27A2        | solute carrier family 27 (fatty acid transporter), member 2 | ENST00000544960 |  | -0,838252171 |
| A_21_P0009346 | TCONS_00025730    | XLOC_012551    |                                                             |                 |  | -0,838630637 |
| A_23_P10182   | NM_003500         | ACOX2          | acyl-CoA oxidase 2, branched chain                          | ENST00000460921 |  | -0,839016292 |
| A_33_P3242952 | NM_001123168      | FAM72A         | family with sequence similarity 72, member A                | ENST00000369392 |  | -0,839331427 |
| A_23_P145863  | NM_005620         | S100A11        | S100 calcium binding protein A11                            | ENST00000271638 |  | -0,839464163 |
| A_24_P250922  | NM_000963         | PTGS2          | prostaglandin-endoperoxide synthase 2 (prostaglandin G/H    | ENST00000490885 |  | -0,839695983 |
| A_23_P112846  | NM_001144978      | MTHFD2L        | methylenetetrahydrofolate dehydrogenase (NADP+ depend       | ENST00000492183 |  | -0,839940961 |
| A_23_P121564  | NM_000857         | GUCY1B3        | guanylate cyclase 1, soluble, beta 3                        | ENST00000264424 |  | -0,839970883 |
| A_33_P3287907 | NR_024398         | LOC728723      | uncharacterized LOC728723                                   | ENST00000512001 |  | -0,84016585  |
| A_21_P0012521 | NR_033752         | LOC344887      | NmrA-like family domain containing 1 pseudogene             | ENST00000416764 |  | -0,840916014 |
| A_21_P0003901 | ENST00000505454   | XLOC_004091    |                                                             | ENST00000505454 |  | -0,841031931 |
| A_23_P321388  | NM_153341         | RNF19B         | ring finger protein 19B                                     | ENST00000405457 |  | -0,841867766 |
| A_24_P250922  | NM_000963         | PTGS2          | prostaglandin-endoperoxide synthase 2 (prostaglandin G/H    | ENST00000490885 |  | -0,842696526 |
| A_23_P11841   | NM_001684         | ATP2B4         | ATPase, Ca <sup>++</sup> transporting, plasma membrane 4    | ENST00000341360 |  | -0,842778652 |
| A_23_P42718   | NM_004289         | NFE2L3         | nuclear factor (erythroid-derived 2)-like 3                 | ENST00000398175 |  | -0,843119196 |
| A_23_P10647   | NM_018659         | CYTL1          | cytokine-like 1                                             | ENST00000307746 |  | -0,843425847 |
| A_21_P0012101 | ENST00000432711   | XLOC_I2_008396 |                                                             | ENST00000432711 |  | -0,843443359 |
| A_23_P118834  | NM_001067         | TOP2A          | topoisomerase (DNA) II alpha 170kDa                         | ENST00000269577 |  | -0,843553007 |
| A_21_P0014880 | XR_132792         | LOC100652751   | uncharacterized LOC100652751                                |                 |  | -0,843732279 |
| A_32_P60065   | NM_004101         | F2RL2          | coagulation factor II (thrombin) receptor-like 2            | ENST00000296641 |  | -0,844326736 |
| A_24_P250922  | NM_000963         | PTGS2          | prostaglandin-endoperoxide synthase 2 (prostaglandin G/H    | ENST00000490885 |  | -0,844820039 |

|               |                 |                |                                                              |                 |              |
|---------------|-----------------|----------------|--------------------------------------------------------------|-----------------|--------------|
| A_33_P3215883 | NM_002019       | FLT1           | fms-related tyrosine kinase 1 (vascular endothelial growth f | ENST00000282397 | -0,844853727 |
| A_23_P404162  | NM_014707       | HDAC9          | histone deacetylase 9                                        | ENST00000405010 | -0,844962034 |
| A_23_P3177    | NM_022054       | KCNK13         | potassium channel, subfamily K, member 13                    | ENST00000282146 | -0,846019293 |
| A_23_P56734   | NM_006895       | HNMT           | histamine N-methyltransferase                                | ENST00000485653 | -0,846383658 |
| A_23_P132644  | NM_020792       | NCEH1          | neutral cholesterol ester hydrolase 1                        | ENST00000538775 | -0,846701012 |
| A_23_P423482  | NM_152450       | FAM81A         | family with sequence similarity 81, member A                 | ENST00000288228 | -0,846736396 |
| A_24_P348806  | NM_175058       | PLEKHA7        | pleckstrin homology domain containing, family A member 7     | ENST00000448080 | -0,846922288 |
| A_24_P250922  | NM_000963       | PTGS2          | prostaglandin-endoperoxide synthase 2 (prostaglandin G/H     | ENST00000490885 | -0,84695857  |
| A_24_P97405   | NM_003965       | CCRL2          | chemokine (C-C motif) receptor-like 2                        | ENST00000400880 | -0,847616129 |
| A_23_P25706   | NM_024734       | CLMN           | calmin (calponin-like, transmembrane)                        | ENST00000298912 | -0,847755472 |
| A_23_P123853  | NM_006274       | CCL19          | chemokine (C-C motif) ligand 19                              | ENST00000485502 | -0,847899485 |
| A_23_P69383   | NM_031458       | PARP9          | poly (ADP-ribose) polymerase family, member 9                | ENST00000452457 | -0,847916226 |
| A_23_P10182   | NM_003500       | ACOX2          | acyl-CoA oxidase 2, branched chain                           | ENST00000460921 | -0,848089531 |
| A_23_P104438  | NM_032578       | MYPN           | myopalladin                                                  | ENST00000354393 | -0,8483851   |
| A_23_P121564  | NM_000857       | GUCY1B3        | guanylate cyclase 1, soluble, beta 3                         | ENST00000264424 | -0,849260905 |
| A_33_P3236177 | NM_001145       | ANG            | angiogenin, ribonuclease, RNase A family, 5                  | ENST00000336811 | -0,849622795 |
| A_21_P0008706 | TCONS_00023587  | XLOC_011401    |                                                              |                 | -0,849664397 |
| A_21_P0010703 | ENST00000443284 | XLOC_I2_000217 |                                                              | ENST00000443284 | -0,850432991 |
| A_23_P94754   | NM_005118       | TNFSF15        | tumor necrosis factor (ligand) superfamily, member 15        | ENST00000374044 | -0,850489587 |
| A_21_P0010998 | THC2636507      | XLOC_I2_002469 |                                                              |                 | -0,851179208 |
| A_23_P118     | NM_001439       | EXTL2          | exostoses (multiple)-like 2                                  | ENST00000370114 | -0,851229023 |
| A_23_P112554  | NM_001855       | COL15A1        | collagen, type XV, alpha 1                                   | ENST00000375001 | -0,851729539 |
| A_23_P118     | NM_001439       | EXTL2          | exostoses (multiple)-like 2                                  | ENST00000370114 | -0,851952636 |
| A_23_P103617  | NM_003568       | ANXA9          | annexin A9                                                   | ENST00000368947 | -0,852064241 |
| A_21_P0003036 | TCONS_00006248  | XLOC_002841    |                                                              |                 | -0,852160078 |
| A_24_P46130   | NM_001099       | ACPP           | acid phosphatase, prostate                                   | ENST00000336375 | -0,852544576 |
| A_23_P376488  | NM_000594       | TNF            | tumor necrosis factor                                        | ENST00000376122 | -0,852716779 |
| A_23_P105794  | NM_033255       | EPSTI1         | epithelial stromal interaction 1 (breast)                    | ENST00000476830 | -0,852905655 |
| A_24_P416997  | NM_145641       | APOL3          | apolipoprotein L, 3                                          | ENST00000397287 | -0,853279728 |



|                |                                 |             |                                                                |                 |              |
|----------------|---------------------------------|-------------|----------------------------------------------------------------|-----------------|--------------|
| A_24_P250922   | NM_000963                       | PTGS2       | prostaglandin-endoperoxide synthase 2 (prostaglandin G/H       | ENST00000490885 | -0,853882822 |
| A_33_P3212232  | NM_001039396                    | MPEG1       | macrophage expressed 1                                         | ENST00000361050 | -0,854084458 |
| A_23_P139704   | NM_001946                       | DUSP6       | dual specificity phosphatase 6                                 | ENST00000279488 | -0,854280349 |
| A_23_P200728   | NM_000569                       | FCGR3A      | Fc fragment of IgG, low affinity IIIa, receptor (CD16a)        | ENST00000426740 | -0,854294151 |
| A_23_P402319   | NM_152687                       | GAPT        | GRB2-binding adaptor protein, transmembrane                    | ENST00000318469 | -0,854501664 |
| A_23_P104438   | NM_032578                       | MYPN        | myopalladin                                                    | ENST00000354393 | -0,854871104 |
| A_21_P0010888  | TCONS_I2_0000364(XLOC_I2_002033 |             |                                                                |                 | -0,855036482 |
| A_23_P1014     | NR_026761                       | LINC00467   | long intergenic non-protein coding RNA 467                     |                 | -0,855330452 |
| A_23_P99452    | NM_000059                       | BRCA2       | breast cancer 2, early onset                                   | ENST00000380152 | -0,855520347 |
| A_33_P3310371  | NR_027436                       | LOC283788   | FSHD region gene 1 pseudogene                                  | ENST00000418749 | -0,855731859 |
| A_33_P3283964  | NR_033740                       | CES1P2      | carboxylesterase 1 pseudogene 2                                |                 | -0,855922644 |
| A_24_P250922   | NM_000963                       | PTGS2       | prostaglandin-endoperoxide synthase 2 (prostaglandin G/H       | ENST00000490885 | -0,855991419 |
| A_23_P209678   | NM_002664                       | PLEK        | pleckstrin                                                     | ENST00000234313 | -0,856292521 |
| A_23_P104438   | NM_032578                       | MYPN        | myopalladin                                                    | ENST00000354393 | -0,856521041 |
| A_24_P250922   | NM_000963                       | PTGS2       | prostaglandin-endoperoxide synthase 2 (prostaglandin G/H       | ENST00000490885 | -0,856862707 |
| A_33_P3275510  | NM_152504                       | C20orf196   | chromosome 20 open reading frame 196                           | ENST00000303142 | -0,857347013 |
| A_23_P96165    | NM_024650                       | C11orf80    | chromosome 11 open reading frame 80                            | ENST00000346672 | -0,857470356 |
| A_33_P3412900  | NM_001039771                    | CBLN3       | cerebellin 3 precursor                                         | ENST00000267406 | -0,857931655 |
| A_23_P207564   | NM_002984                       | CCL4        | chemokine (C-C motif) ligand 4                                 | ENST00000250151 | -0,858046773 |
| A_23_P19816    | NM_030936                       | RNF32       | ring finger protein 32                                         | ENST00000405335 | -0,858562693 |
| A_33_P3212804  | NM_001010859                    | C22orf42    | chromosome 22 open reading frame 42                            | ENST00000467813 | -0,858852289 |
| A_24_P335620   | NM_003486                       | SLC7A5      | solute carrier family 7 (amino acid transporter light chain, L | ENST00000261622 | -0,859054738 |
| A_23_P145874   | NM_152703                       | SAMD9L      | sterile alpha motif domain containing 9-like                   | ENST00000411955 | -0,859254514 |
| A_33_P3389704  | NM_001266                       | CES1        | carboxylesterase 1                                             | ENST00000422046 | -0,859509412 |
| A_24_P36890    | NM_002885                       | RAP1GAP     | RAP1 GTPase activating protein                                 | ENST00000495204 | -0,859986221 |
| A_23_P379475   | NM_014762                       | DHCR24      | 24-dehydrocholesterol reductase                                | ENST00000371269 | -0,860222823 |
| A_23_P432448   | NR_024166                       | MGC3771     | uncharacterized LOC81854                                       |                 | -0,860308366 |
| A_19_P00323025 | ENST00000467995                 | XLOC_002892 |                                                                | ENST00000467995 | -0,860767627 |
| A_23_P108823   | NM_032523                       | OSBPL6      | oxysterol binding protein-like 6                               | ENST00000315022 | -0,860798523 |

|                |                 |              |                                                                          |                 |              |
|----------------|-----------------|--------------|--------------------------------------------------------------------------|-----------------|--------------|
| A_23_P21976    | NM_001897       | CSPG4        | chondroitin sulfate proteoglycan 4                                       | ENST00000308508 | -0,860979541 |
| A_33_P3326210  | NM_001017420    | ESCO2        | establishment of cohesion 1 homolog 2 ( <i>S. cerevisiae</i> )           | ENST00000397418 | -0,862327388 |
| A_21_P0014266  | XR_109050       | LOC100507417 | uncharacterized LOC100507417                                             |                 | -0,863129763 |
| A_19_P00317616 | ENST00000428487 | Q2I700       |                                                                          | ENST00000428487 | -0,863955283 |
| A_24_P133162   | NM_178122       | C1orf201     | chromosome 1 open reading frame 201                                      | ENST00000337248 | -0,864330105 |
| A_21_P0008156  | TCONS_00021991  | XLOC_010591  |                                                                          |                 | -0,865040931 |
| A_23_P203376   | NM_152852       | MS4A6A       | membrane-spanning 4-domains, subfamily A, member 6A                      | ENST00000323961 | -0,865527781 |
| A_23_P35219    | NM_002497       | NEK2         | NIMA (never in mitosis gene a)-related kinase 2                          | ENST00000462283 | -0,86574391  |
| A_23_P46039    | NM_032738       | FCRLA        | Fc receptor-like A                                                       | ENST00000236938 | -0,866088361 |
| A_24_P396753   | NM_021643       | TRIB2        | tribbles homolog 2 ( <i>Drosophila</i> )                                 | ENST00000155926 | -0,866891812 |
| A_23_P257971   | NM_001353       | AKR1C1       | aldo-keto reductase family 1, member C1 (dihydrodiol dehy                | ENST00000460124 | -0,867449683 |
| A_21_P0007626  | THC2748864      | XLOC_009880  |                                                                          |                 | -0,867543561 |
| A_24_P398323   | NM_001003827    | TRIM34       | tripartite motif containing 34                                           | ENST00000495668 | -0,869628108 |
| A_23_P10182    | NM_003500       | ACOX2        | acyl-CoA oxidase 2, branched chain                                       | ENST00000460921 | -0,870400073 |
| A_23_P62890    | NM_002053       | GBP1         | guanylate binding protein 1, interferon-inducible                        | ENST00000370473 | -0,870430101 |
| A_23_P62659    | NM_000310       | PPT1         | palmitoyl-protein thioesterase 1                                         | ENST00000433473 | -0,870739298 |
| A_23_P32078    | NM_022127       | SLC28A3      | solute carrier family 28 (sodium-coupled nucleoside transp               | ENST00000537648 | -0,871093834 |
| A_23_P10182    | NM_003500       | ACOX2        | acyl-CoA oxidase 2, branched chain                                       | ENST00000460921 | -0,872188408 |
| A_23_P110941   | NM_001512       | GSTA4        | glutathione S-transferase alpha 4                                        | ENST00000370960 | -0,872246723 |
| A_23_P17663    | NM_002462       | MX1          | myxovirus (influenza virus) resistance 1, interferon-inducibl            | ENST00000455164 | -0,872630337 |
| A_21_P0008806  | TCONS_00023844  | XLOC_011616  |                                                                          |                 | -0,873273102 |
| A_23_P205370   | NM_016150       | ASB2         | ankyrin repeat and SOCS box containing 2                                 | ENST00000553883 | -0,873611002 |
| A_23_P45304    | NM_021083       | XK           | X-linked Kx blood group (McLeod syndrome)                                | ENST00000378616 | -0,873635197 |
| A_23_P103511   | NM_001085375    | C1orf226     | chromosome 1 open reading frame 226                                      | ENST00000458626 | -0,87369347  |
| A_23_P412577   | NM_173505       | ANKRD29      | ankyrin repeat domain 29                                                 | ENST00000284207 | -0,874033553 |
| A_32_P128258   | NR_002804       | SIGLECP3     | sialic acid binding Ig-like lectin, pseudogene 3                         |                 | -0,874912248 |
| A_23_P105794   | NM_033255       | EPSTI1       | epithelial stromal interaction 1 (breast)                                | ENST00000476830 | -0,875278636 |
| A_24_P250922   | NM_000963       | PTGS2        | prostaglandin-endoperoxide synthase 2 (prostaglandin G/H                 | ENST00000490885 | -0,875528276 |
| A_24_P91832    | NM_012069       | ATP1B4       | ATPase, Na <sup>+</sup> /K <sup>+</sup> transporting, beta 4 polypeptide | ENST00000218008 | -0,875622711 |

|               |                  |                |                                                       |                 |              |
|---------------|------------------|----------------|-------------------------------------------------------|-----------------|--------------|
| A_33_P3774867 | BC094703         | MGC11082       | uncharacterized LOC84777                              |                 | -0,877100794 |
| A_23_P10182   | NM_003500        | ACOX2          | acyl-CoA oxidase 2, branched chain                    | ENST00000460921 | -0,87748717  |
| A_23_P118834  | NM_001067        | TOP2A          | topoisomerase (DNA) II alpha 170kDa                   | ENST00000269577 | -0,877503763 |
| A_23_P103486  | NM_000775        | CYP2J2         | cytochrome P450, family 2, subfamily J, polypeptide 2 | ENST00000469406 | -0,877692033 |
| A_21_P0008555 | AK056686         | XLOC_011237    |                                                       |                 | -0,878161094 |
| A_21_P0007550 | ENST00000546738  | XLOC_009733    |                                                       | ENST00000546738 | -0,878752106 |
| A_23_P256956  | NM_005733        | KIF20A         | kinesin family member 20A                             | ENST00000502338 | -0,878787424 |
| A_21_P0003325 | ENST00000514265  | XLOC_004072    |                                                       | ENST00000514265 | -0,879070156 |
| A_23_P10182   | NM_003500        | ACOX2          | acyl-CoA oxidase 2, branched chain                    | ENST00000460921 | -0,879143271 |
| A_23_P88678   | NM_152335        | C15orf27       | chromosome 15 open reading frame 27                   | ENST00000484722 | -0,879362479 |
| A_33_P3257165 | NM_013313        | YPEL1          | yippee-like 1 (Drosophila)                            | ENST00000477675 | -0,87962848  |
| A_23_P73114   | NM_000313        | PROS1          | protein S (alpha)                                     | ENST00000394236 | -0,879749869 |
| A_23_P134454  | NM_001753        | CAV1           | caveolin 1, caveolae protein, 22kDa                   | ENST00000341049 | -0,87994159  |
| A_21_P0002086 | ENST00000443123  | XLOC_002250    |                                                       | ENST00000443123 | -0,880778262 |
| A_21_P0005485 | TCONS_00013750   | XLOC_006389    |                                                       |                 | -0,880993997 |
| A_23_P118     | NM_001439        | EXTL2          | exostoses (multiple)-like 2                           | ENST00000370114 | -0,881754652 |
| A_23_P118834  | NM_001067        | TOP2A          | topoisomerase (DNA) II alpha 170kDa                   | ENST00000269577 | -0,882183161 |
| A_33_P3258046 | NM_170685        | TAC4           | tachykinin 4 (hemokinin)                              | ENST00000334568 | -0,882780427 |
| A_23_P110184  | NM_006745        | MSMO1          | methylsterol monooxygenase 1                          | ENST00000393766 | -0,882835733 |
| A_23_P94412   | NM_025239        | PDCD1LG2       | programmed cell death 1 ligand 2                      | ENST00000397747 | -0,883405579 |
| A_23_P61487   | NM_018205        | LRRC20         | leucine rich repeat containing 20                     | ENST00000358141 | -0,883621723 |
| A_33_P3343175 | NM_001565        | CXCL10         | chemokine (C-X-C motif) ligand 10                     | ENST00000306602 | -0,88371439  |
| A_23_P120467  | NM_199427        | ZFP64          | zinc finger protein 64 homolog (mouse)                | ENST00000361387 | -0,88377337  |
| A_21_P0014268 | ENST00000525365  | LOC100506082   |                                                       | ENST00000525365 | -0,884291242 |
| A_21_P0010853 | TCONS_I2_0000337 | XLOC_I2_001841 |                                                       |                 | -0,88446846  |
| A_33_P3262416 | NM_001141972     | ATPBD4         | ATP binding domain 4                                  | ENST00000440392 | -0,885400702 |
| A_23_P42746   | NM_000265        | NCF1           | neutrophil cytosolic factor 1                         | ENST00000289473 | -0,885505689 |
| A_21_P0000827 | NR_038894        | LOC100506428   | uncharacterized LOC100506428                          |                 | -0,885876984 |
| A_32_P44394   | NM_004833        | AIM2           | absent in melanoma 2                                  | ENST00000368130 | -0,887017249 |

|               |                                 |              |                                                                  |                 |              |
|---------------|---------------------------------|--------------|------------------------------------------------------------------|-----------------|--------------|
| A_23_P143374  | NM_025176                       | NINL         | ninein-like                                                      | ENST00000464285 | -0,887651951 |
| A_23_P10182   | NM_003500                       | ACOX2        | acyl-CoA oxidase 2, branched chain                               | ENST00000460921 | -0,887835302 |
| A_33_P3217819 | NM_057749                       | CCNE2        | cyclin E2                                                        | ENST00000542725 | -0,889289389 |
| A_23_P153562  | NM_001736                       | C5AR1        | complement component 5a receptor 1                               | ENST00000355085 | -0,890230725 |
| A_23_P108823  | NM_032523                       | OSBPL6       | oxysterol binding protein-like 6                                 | ENST00000315022 | -0,890427016 |
| A_23_P32165   | NM_004789                       | LHX2         | LIM homeobox 2                                                   | ENST00000373615 | -0,89186796  |
| A_33_P3329013 | NM_001050                       | SSTR2        | somatostatin receptor 2                                          | ENST00000315332 | -0,891895555 |
| A_33_P3390057 | NM_014220                       | TM4SF1       | transmembrane 4 L six family member 1                            | ENST00000383054 | -0,893142493 |
| A_33_P3263890 | NM_006902                       | PRRX1        | paired related homeobox 1                                        | ENST00000239461 | -0,893273431 |
| A_24_P132624  | NM_018376                       | NIPSNAP3B    | nipsnap homolog 3B (C. elegans)                                  | ENST00000461177 | -0,893554928 |
| A_23_P71530   | NM_002546                       | TNFRSF11B    | tumor necrosis factor receptor superfamily, member 11b           | ENST00000521597 | -0,893678809 |
| A_23_P252740  | NM_024094                       | DSCC1        | defective in sister chromatid cohesion 1 homolog (S. cerevisiae) | ENST00000313655 | -0,893728658 |
| A_21_P0013306 | NM_007270                       | FKBP9        | FK506 binding protein 9, 63 kDa                                  | ENST00000472007 | -0,894307425 |
| A_23_P103511  | NM_001085375                    | C1orf226     | chromosome 1 open reading frame 226                              | ENST00000458626 | -0,895043404 |
| A_21_P0005592 | ENST00000480919                 | XLOC_006326  |                                                                  | ENST00000480919 | -0,895660428 |
| A_23_P105794  | NM_033255                       | EPSTI1       | epithelial stromal interaction 1 (breast)                        | ENST00000476830 | -0,895728764 |
| A_23_P105794  | NM_033255                       | EPSTI1       | epithelial stromal interaction 1 (breast)                        | ENST00000476830 | -0,895835536 |
| A_21_P0013589 | XR_108989                       | LOC100507540 | uncharacterized LOC100507540                                     |                 | -0,896799392 |
| A_23_P207201  | NM_001039933                    | CD79B        | CD79b molecule, immunoglobulin-associated beta                   | ENST00000392795 | -0,896872999 |
| A_33_P3237135 | NM_004530                       | MMP2         | matrix metalloproteinase 2 (gelatinase A, 72kDa gelatinase,      | ENST00000437642 | -0,897549984 |
| A_24_P7121    | NM_024677                       | NSUN7        | NOP2/Sun domain family, member 7                                 | ENST00000381782 | -0,897854736 |
| A_23_P67042   | NM_017947                       | MOCOS        | molybdenum cofactor sulfurase                                    | ENST00000261326 | -0,898206805 |
| A_23_P105794  | NM_033255                       | EPSTI1       | epithelial stromal interaction 1 (breast)                        | ENST00000476830 | -0,898720328 |
| A_23_P71530   | NM_002546                       | TNFRSF11B    | tumor necrosis factor receptor superfamily, member 11b           | ENST00000521597 | -0,898764564 |
| A_23_P1331    | NM_080801                       | COL13A1      | collagen, type XIII, alpha 1                                     | ENST00000478219 | -0,899331963 |
| A_24_P252996  | NM_000804                       | FOLR3        | folate receptor 3 (gamma)                                        | ENST00000542161 | -0,899450126 |
| A_23_P118834  | NM_001067                       | TOP2A        | topoisomerase (DNA) II alpha 170kDa                              | ENST00000269577 | -0,900054806 |
| A_24_P230563  | NM_000417                       | IL2RA        | interleukin 2 receptor, alpha                                    | ENST00000447847 | -0,90030676  |
| A_21_P0012671 | TCONS_I2_0002119;XLOC_I2_011173 |              |                                                                  |                 | -0,900556932 |

|               |                                  |                |                                                              |                 |              |
|---------------|----------------------------------|----------------|--------------------------------------------------------------|-----------------|--------------|
| A_23_P207400  | NM_007300                        | BRCA1          | breast cancer 1, early onset                                 | ENST00000412061 | -0,90089994  |
| A_23_P121564  | NM_000857                        | GUCY1B3        | guanylate cyclase 1, soluble, beta 3                         | ENST00000264424 | -0,901276757 |
| A_21_P0013034 | TCONS_I2_0002437(XLOC_I2_012678) |                |                                                              |                 | -0,901341629 |
| A_33_P3212615 | NM_006287                        | TFPI           | tissue factor pathway inhibitor (lipoprotein-associated coag | ENST00000233156 | -0,901487561 |
| A_21_P0001876 | ENST00000415138                  | XLOC_001517    |                                                              | ENST00000415138 | -0,901682067 |
| A_23_P200138  | NM_020125                        | SLAMF8         | SLAM family member 8                                         | ENST00000289707 | -0,901756479 |
| A_24_P239419  | NM_001018041                     | EPM2A          | epilepsy, progressive myoclonus type 2A, Lafora disease (la  | ENST00000535403 | -0,901789228 |
| A_23_P9523    | NM_022128                        | RBKS           | ribokinase                                                   | ENST00000449378 | -0,902343345 |
| A_23_P10182   | NM_003500                        | ACOX2          | acyl-CoA oxidase 2, branched chain                           | ENST00000460921 | -0,902759105 |
| A_24_P23625   | ENST00000360954                  | HS3ST3B1       | heparan sulfate (glucosamine) 3-O-sulfotransferase 3B1       | ENST00000360954 | -0,903618788 |
| A_21_P0012778 | ENST00000510780                  | XLOC_I2_011173 |                                                              | ENST00000510780 | -0,903677106 |
| A_23_P77918   | NM_006041                        | HS3ST3B1       | heparan sulfate (glucosamine) 3-O-sulfotransferase 3B1       | ENST00000360954 | -0,904470342 |
| A_23_P69109   | NM_021105                        | PLSCR1         | phospholipid scramblase 1                                    | ENST00000448205 | -0,904494587 |
| A_23_P30666   | NM_014452                        | TNFRSF21       | tumor necrosis factor receptor superfamily, member 21        | ENST00000419206 | -0,904519253 |
| A_23_P34915   | NM_001040619                     | ATF3           | activating transcription factor 3                            | ENST00000366987 | -0,904571587 |
| A_23_P26771   | NM_006678                        | CD300C         | CD300c molecule                                              | ENST00000330793 | -0,905467646 |
| A_23_P10182   | NM_003500                        | ACOX2          | acyl-CoA oxidase 2, branched chain                           | ENST00000460921 | -0,906308672 |
| A_33_P3415032 | NM_002232                        | KCNA3          | potassium voltage-gated channel, shaker-related subfamily,   | ENST00000369769 | -0,9065825   |
| A_33_P3369371 | NM_002084                        | GPX3           | glutathione peroxidase 3 (plasma)                            | ENST00000388825 | -0,90746004  |
| A_23_P110184  | NM_006745                        | MSMO1          | methylsterol monooxygenase 1                                 | ENST00000393766 | -0,908280021 |
| A_23_P218068  | NM_019012                        | PLEKHA5        | pleckstrin homology domain containing, family A member 5     | ENST00000542828 | -0,908312598 |
| A_23_P10182   | NM_003500                        | ACOX2          | acyl-CoA oxidase 2, branched chain                           | ENST00000460921 | -0,908521733 |
| A_33_P3283430 | NM_025229                        | SEL1L2         | sel-1 suppressor of lin-12-like 2 (C. elegans)               | ENST00000423870 | -0,908875826 |
| A_24_P68908   | NR_033752                        | LOC344887      | NmrA-like family domain containing 1 pseudogene              | ENST00000423298 | -0,909118034 |
| A_33_P3388482 | NM_001080825                     | TMEM120B       | transmembrane protein 120B                                   | ENST00000342607 | -0,909957134 |
| A_23_P89431   | NM_002982                        | CCL2           | chemokine (C-C motif) ligand 2                               | ENST00000225831 | -0,910081246 |
| A_23_P78037   | NM_006273                        | CCL7           | chemokine (C-C motif) ligand 7                               | ENST00000394627 | -0,911124393 |
| A_21_P0010536 | NM_018284                        | GBP3           | guanylate binding protein 3                                  | ENST00000461384 | -0,9111735   |
| A_23_P337262  | NM_153000                        | APCDD1         | adenomatosis polyposis coli down-regulated 1                 | ENST00000423585 | -0,911742396 |



|               |                   |                |                                                           |                 |              |
|---------------|-------------------|----------------|-----------------------------------------------------------|-----------------|--------------|
| A_23_P313828  | NM_181716         | CENPV          | centromere protein V                                      | ENST00000299736 | -0,912066257 |
| A_23_P89431   | NM_002982         | CCL2           | chemokine (C-C motif) ligand 2                            | ENST00000225831 | -0,912184598 |
| A_23_P131935  | NM_017671         | FERMT1         | fermitin family member 1                                  | ENST00000217289 | -0,912401298 |
| A_24_P185709  | NM_012156         | EPB41L1        | erythrocyte membrane protein band 4.1-like 1              | ENST00000344237 | -0,91244356  |
| A_33_P3234202 | NM_004944         | DNASE1L3       | deoxyribonuclease I-like 3                                | ENST00000394549 | -0,912916367 |
| A_23_P386478  | NM_024873         | TNIP3          | TNFAIP3 interacting protein 3                             | ENST00000511909 | -0,912957393 |
| A_21_P0008613 | THC2662357        | XLOC_011213    |                                                           |                 | -0,913187836 |
| A_24_P82466   | NM_201433         | GAS7           | growth arrest-specific 7                                  | ENST00000323816 | -0,913967698 |
| A_33_P3282566 | NM_017728         | TMEM104        | transmembrane protein 104                                 | ENST00000335464 | -0,91567389  |
| A_33_P3246833 | NM_173843         | IL1RN          | interleukin 1 receptor antagonist                         | ENST00000259206 | -0,91571174  |
| A_23_P119778  | NM_020342         | SLC39A10       | solute carrier family 39 (zinc transporter), member 10    | ENST00000409086 | -0,915855505 |
| A_23_P37410   | NM_031226         | CYP19A1        | cytochrome P450, family 19, subfamily A, polypeptide 1    | ENST00000541721 | -0,915905134 |
| A_32_P147078  | NM_021097         | SLC8A1         | solute carrier family 8 (sodium/calcium exchanger), membe | ENST00000542640 | -0,916006211 |
| A_21_P0013038 | TCONS_I2_0002443: | XLOC_I2_012727 |                                                           |                 | -0,916073968 |
| A_23_P206359  | NM_004360         | CDH1           | cadherin 1, type 1, E-cadherin (epithelial)               | ENST00000261769 | -0,916254992 |
| A_23_P112554  | NM_001855         | COL15A1        | collagen, type XV, alpha 1                                | ENST00000375001 | -0,917082755 |
| A_32_P231617  | NM_014220         | TM4SF1         | transmembrane 4 L six family member 1                     | ENST00000383054 | -0,917223973 |
| A_23_P16953   | NM_000867         | HTR2B          | 5-hydroxytryptamine (serotonin) receptor 2B               | ENST00000540289 | -0,918405072 |
| A_32_P30649   | NM_004454         | ETV5           | ets variant 5                                             | ENST00000306376 | -0,91945111  |
| A_33_P3253394 | NM_002287         | LAIR1          | leukocyte-associated immunoglobulin-like receptor 1       |                 | -0,919548796 |
| A_33_P3281191 | NM_002508         | NID1           | nidogen 1                                                 | ENST00000366595 | -0,919863348 |
| A_23_P110196  | NM_016323         | HERC5          | hect domain and RLD 5                                     | ENST00000502913 | -0,920242216 |
| A_24_P13715   | NM_147188         | FBXO22         | F-box protein 22                                          | ENST00000308275 | -0,920855241 |
| A_23_P145694  | NM_001673         | ASNS           | asparagine synthetase (glutamine-hydrolyzing)             | ENST00000394308 | -0,920938134 |
| A_23_P133474  | NM_002084         | GPX3           | glutathione peroxidase 3 (plasma)                         | ENST00000458211 | -0,922147659 |
| A_21_P0001059 | ENST00000423842   | XLOC_000554    |                                                           | ENST00000423842 | -0,922197117 |
| A_33_P3309984 | NM_000221         | KHK            | ketoheksokinase (fructokinase)                            | ENST00000260599 | -0,922958071 |
| A_23_P390518  | NM_003839         | TNFRSF11A      | tumor necrosis factor receptor superfamily, member 11a, N | ENST00000382790 | -0,92296843  |
| A_23_P89431   | NM_002982         | CCL2           | chemokine (C-C motif) ligand 2                            | ENST00000225831 | -0,924814271 |

|                |                                  |                |                                                        |                 |              |
|----------------|----------------------------------|----------------|--------------------------------------------------------|-----------------|--------------|
| A_23_P114740   | NM_000186                        | CFH            | complement factor H                                    | ENST00000466229 | -0,925028614 |
| A_23_P89431    | NM_002982                        | CCL2           | chemokine (C-C motif) ligand 2                         | ENST00000225831 | -0,926069452 |
| A_21_P0013613  | TCONS_I2_0002916: XLOC_I2_015090 |                |                                                        |                 | -0,926271236 |
| A_23_P96285    | NM_022912                        | REEP1          | receptor accessory protein 1                           | ENST00000535845 | -0,926466095 |
| A_23_P71530    | NM_002546                        | TNFRSF11B      | tumor necrosis factor receptor superfamily, member 11b | ENST00000521597 | -0,92671643  |
| A_23_P89431    | NM_002982                        | CCL2           | chemokine (C-C motif) ligand 2                         | ENST00000225831 | -0,927122356 |
| A_24_P115007   | NM_170740                        | ALDH5A1        | aldehyde dehydrogenase 5 family, member A1             | ENST00000357578 | -0,927963292 |
| A_33_P3367301  | NM_152219                        | GJD3           | gap junction protein, delta 3, 31.9kDa                 |                 | -0,928222531 |
| A_23_P33326    | NM_000679                        | ADRA1B         | adrenergic, alpha-1B-, receptor                        |                 | -0,928232931 |
| A_23_P89431    | NM_002982                        | CCL2           | chemokine (C-C motif) ligand 2                         | ENST00000225831 | -0,928315955 |
| A_23_P13382    | NM_001013254                     | LSP1           | lymphocyte-specific protein 1                          | ENST00000406638 | -0,929329811 |
| A_23_P118834   | NM_001067                        | TOP2A          | topoisomerase (DNA) II alpha 170kDa                    | ENST00000269577 | -0,930150077 |
| A_24_P272451   | AK057142                         | C17orf87       | chromosome 17 open reading frame 87                    |                 | -0,93026071  |
| A_21_P0009754  | TCONS_00027265                   | XLOC_013282    |                                                        |                 | -0,930581638 |
| A_33_P3352098  | NM_021201                        | MS4A7          | membrane-spanning 4-domains, subfamily A, member 7     | ENST00000358246 | -0,930641802 |
| A_24_P12397    | NM_018965                        | TREM2          | triggering receptor expressed on myeloid cells 2       | ENST00000373122 | -0,930688826 |
| A_23_P118      | NM_001439                        | EXTL2          | exostoses (multiple)-like 2                            | ENST00000370114 | -0,931359551 |
| A_23_P11201    | NM_001097579                     | GPR34          | G protein-coupled receptor 34                          | ENST00000535368 | -0,931853837 |
| A_24_P48204    | NM_003004                        | SECTM1         | secreted and transmembrane 1                           | ENST00000269389 | -0,931975947 |
| A_33_P3225512  | NM_002535                        | OAS2           | 2'-5'-oligoadenylate synthetase 2, 69/71kDa            | ENST00000392583 | -0,933306885 |
| A_23_P89431    | NM_002982                        | CCL2           | chemokine (C-C motif) ligand 2                         | ENST00000225831 | -0,93353504  |
| A_23_P1331     | NM_080801                        | COL13A1        | collagen, type XIII, alpha 1                           | ENST00000478219 | -0,934060668 |
| A_33_P3241204  | NM_001129742                     | CALHM3         | calcium homeostasis modulator 3                        | ENST00000369783 | -0,93421427  |
| A_23_P110196   | NM_016323                        | HERC5          | hect domain and RLD 5                                  | ENST00000502913 | -0,934268961 |
| A_24_P788878   | NM_001007595                     | C2CD4B         | C2 calcium-dependent domain containing 4B              | ENST00000380392 | -0,934877753 |
| A_23_P89431    | NM_002982                        | CCL2           | chemokine (C-C motif) ligand 2                         | ENST00000225831 | -0,934993586 |
| A_19_P00322264 | ENST00000514050                  | XLOC_I2_011173 |                                                        | ENST00000514050 | -0,935067064 |
| A_23_P112554   | NM_001855                        | COL15A1        | collagen, type XV, alpha 1                             | ENST00000375001 | -0,935460917 |
| A_23_P89431    | NM_002982                        | CCL2           | chemokine (C-C motif) ligand 2                         | ENST00000225831 | -0,936034625 |

|                |                |                |                                                                     |                 |              |
|----------------|----------------|----------------|---------------------------------------------------------------------|-----------------|--------------|
| A_33_P3318117  | NM_000765      | CYP3A7         | cytochrome P450, family 3, subfamily A, polypeptide 7               | ENST00000292414 | -0,936484886 |
| A_33_P3283824  | NM_001135147   | SLC39A8        | solute carrier family 39 (zinc transporter), member 8               | ENST00000424970 | -0,93674944  |
| A_23_P89431    | NM_002982      | CCL2           | chemokine (C-C motif) ligand 2                                      | ENST00000225831 | -0,936801433 |
| A_24_P70183    | NM_001040113   | MYH11          | myosin, heavy chain 11, smooth muscle                               | ENST00000452625 | -0,937123339 |
| A_23_P149529   | NM_002353      | TACSTD2        | tumor-associated calcium signal transducer 2                        | ENST00000371225 | -0,937379465 |
| A_32_P175715   | NM_001080836   | MEIG1          | meiosis expressed gene 1 homolog (mouse)                            | ENST00000378240 | -0,938058492 |
| A_24_P323598   | NM_001017420   | ESCO2          | establishment of cohesion 1 homolog 2 ( <i>S. cerevisiae</i> )      | ENST00000305188 | -0,939477165 |
| A_23_P110196   | NM_016323      | HERC5          | hect domain and RLD 5                                               | ENST00000502913 | -0,940084828 |
| A_23_P92909    | NM_205841      | SPINK6         | serine peptidase inhibitor, Kazal type 6                            | ENST00000325630 | -0,940822986 |
| A_23_P203475   | NM_145040      | PRKCDBP        | protein kinase C, delta binding protein                             | ENST00000303927 | -0,940950075 |
| A_23_P318938   | NM_153022      | C12orf59       | chromosome 12 open reading frame 59                                 | ENST00000536952 | -0,942352236 |
| A_23_P153320   | NM_000201      | ICAM1          | intercellular adhesion molecule 1                                   | ENST00000264832 | -0,943122314 |
| A_21_P0002963  | TCONS_00006034 | XLOC_002675    |                                                                     |                 | -0,943251105 |
| A_21_P0013122  | BC039678       | XLOC_I2_012378 |                                                                     |                 | -0,943545248 |
| A_23_P58266    | NM_005980      | S100P          | S100 calcium binding protein P                                      | ENST00000296370 | -0,943554181 |
| A_21_P0002658  | NR_037631      | LOC100288911   | uncharacterized LOC100288911                                        |                 | -0,944365992 |
| A_23_P153320   | NM_000201      | ICAM1          | intercellular adhesion molecule 1                                   | ENST00000264832 | -0,94484297  |
| A_24_P188447   | NM_021952      | ELAVL4         | ELAV (embryonic lethal, abnormal vision, <i>Drosophila</i> )-like 4 | ENST00000357083 | -0,945598481 |
| A_23_P98763    | NM_145309      | LRTOMT         | leucine rich transmembrane and O-methyltransferase domain           | ENST00000538413 | -0,94597026  |
| A_23_P156687   | NM_001710      | CFB            | complement factor B                                                 | ENST00000546515 | -0,946372517 |
| A_23_P118      | NM_001439      | EXTL2          | exostoses (multiple)-like 2                                         | ENST00000370114 | -0,947684001 |
| A_19_P00316333 | NR_038956      | LOC100506714   | uncharacterized LOC100506714                                        |                 | -0,948036856 |
| A_21_P0003919  | BC095491       | FRG1B          | FSHD region gene 1 family, member B                                 |                 | -0,948128172 |
| A_24_P96780    | NM_016343      | CENPF          | centromere protein F, 350/400kDa (mitosin)                          | ENST00000391896 | -0,949251032 |
| A_23_P75299    | NM_022126      | LHPP           | phospholysine phosphohistidine inorganic pyrophosphate p            | ENST00000368842 | -0,949333024 |
| A_23_P118834   | NM_001067      | TOP2A          | topoisomerase (DNA) II alpha 170kDa                                 | ENST00000269577 | -0,949465202 |
| A_23_P110196   | NM_016323      | HERC5          | hect domain and RLD 5                                               | ENST00000502913 | -0,950490218 |
| A_24_P222997   | NM_032143      | ZRANB3         | zinc finger, RAN-binding domain containing 3                        | ENST00000283060 | -0,950660612 |
| A_23_P153320   | NM_000201      | ICAM1          | intercellular adhesion molecule 1                                   | ENST00000264832 | -0,950921036 |

|               |                  |                |                                                            |                 |              |
|---------------|------------------|----------------|------------------------------------------------------------|-----------------|--------------|
| A_33_P3692979 | AK093862         | LOC283485      | uncharacterized LOC283485                                  |                 | -0,952165206 |
| A_33_P3351371 | NM_031226        | CYP19A1        | cytochrome P450, family 19, subfamily A, polypeptide 1     | ENST00000405011 | -0,952419    |
| A_23_P110196  | NM_016323        | HERC5          | hect domain and RLD 5                                      | ENST00000502913 | -0,952541752 |
| A_23_P153320  | NM_000201        | ICAM1          | intercellular adhesion molecule 1                          | ENST00000264832 | -0,954172011 |
| A_23_P112554  | NM_001855        | COL15A1        | collagen, type XV, alpha 1                                 | ENST00000375001 | -0,955754816 |
| A_24_P362193  | NM_003874        | CD84           | CD84 molecule                                              | ENST00000368047 | -0,956766405 |
| A_23_P145724  | NM_006658        | PPP1R17        | protein phosphatase 1, regulatory subunit 17               | ENST00000342032 | -0,957602235 |
| A_23_P171107  | NM_033031        | CCNB3          | cyclin B3                                                  | ENST00000376042 | -0,957719172 |
| A_23_P105465  | NM_004072        | CMKLR1         | chemokine-like receptor 1                                  | ENST00000550402 | -0,957781821 |
| A_23_P347169  | NM_001001924     | MTUS1          | microtubule associated tumor suppressor 1                  | ENST00000262102 | -0,958533458 |
| A_33_P3293202 | NM_177965        | C8orf37        | chromosome 8 open reading frame 37                         | ENST00000286688 | -0,95956571  |
| A_33_P3212109 | NM_016356        | DCDC2          | doublecortin domain containing 2                           | ENST00000378450 | -0,959687786 |
| A_21_P0013309 | TCONS_l2_0002659 | XLOC_l2_013848 |                                                            |                 | -0,959762448 |
| A_24_P131066  | NM_004258        | CD101          | CD101 molecule                                             | ENST00000369470 | -0,959989903 |
| A_23_P153320  | NM_000201        | ICAM1          | intercellular adhesion molecule 1                          | ENST00000264832 | -0,961441364 |
| A_32_P86763   | NM_004613        | TGM2           | transglutaminase 2 (C polypeptide, protein-glutamine-gamr  | ENST00000361475 | -0,96145405  |
| A_23_P153320  | NM_000201        | ICAM1          | intercellular adhesion molecule 1                          | ENST00000264832 | -0,961656289 |
| A_33_P3230478 | NM_201442        | C1S            | complement component 1, s subcomponent                     | ENST00000403949 | -0,962081448 |
| A_23_P56559   | NM_005771        | DHRS9          | dehydrogenase/reductase (SDR family) member 9              | ENST00000432060 | -0,962868639 |
| A_24_P33895   | NM_001040619     | ATF3           | activating transcription factor 3                          | ENST00000366983 | -0,963869243 |
| A_23_P110196  | NM_016323        | HERC5          | hect domain and RLD 5                                      | ENST00000502913 | -0,965143999 |
| A_23_P153320  | NM_000201        | ICAM1          | intercellular adhesion molecule 1                          | ENST00000264832 | -0,966626207 |
| A_23_P130182  | NM_004217        | AURKB          | aurora kinase B                                            | ENST00000534871 | -0,966660498 |
| A_33_P3249589 | NM_022893        | BCL11A         | B-cell CLL/lymphoma 11A (zinc finger protein)              | ENST00000358510 | -0,966683043 |
| A_33_P3352467 | NM_001050        | SSTR2          | somatostatin receptor 2                                    | ENST00000357585 | -0,966953842 |
| A_23_P112554  | NM_001855        | COL15A1        | collagen, type XV, alpha 1                                 | ENST00000375001 | -0,967804391 |
| A_24_P277657  | NM_006877        | GMPR           | guanosine monophosphate reductase                          | ENST00000540478 | -0,967953696 |
| A_32_P24585   | NM_001017995     | SH3PXD2B       | SH3 and PX domains 2B                                      | ENST00000311601 | -0,967987467 |
| A_33_P3313617 | NR_003133        | GBP1P1         | guanylate binding protein 1, interferon-inducible pseudoge | ENST00000513638 | -0,970249142 |

|               |              |                |                                                           |                 |              |
|---------------|--------------|----------------|-----------------------------------------------------------|-----------------|--------------|
| A_23_P1331    | NM_080801    | COL13A1        | collagen, type XIII, alpha 1                              | ENST00000478219 | -0,970254847 |
| A_23_P153320  | NM_000201    | ICAM1          | intercellular adhesion molecule 1                         | ENST00000264832 | -0,971955185 |
| A_23_P1331    | NM_080801    | COL13A1        | collagen, type XIII, alpha 1                              | ENST00000478219 | -0,971957819 |
| A_23_P120467  | NM_199427    | ZFP64          | zinc finger protein 64 homolog (mouse)                    | ENST00000361387 | -0,972371454 |
| A_23_P258493  | NM_005573    | LMNB1          | lamin B1                                                  | ENST00000460265 | -0,972540789 |
| A_33_P3379268 | NM_207103    | C17orf87       | chromosome 17 open reading frame 87                       | ENST00000399592 | -0,972616742 |
| A_21_P0007133 | AK056982     | XLOC_009372    |                                                           |                 | -0,973056602 |
| A_23_P154849  | NM_138983    | OLIG1          | oligodendrocyte transcription factor 1                    | ENST00000426947 | -0,973256972 |
| A_23_P204158  | NM_032814    | RNFT2          | ring finger protein, transmembrane 2                      | ENST00000547718 | -0,973355248 |
| A_23_P86470   | NM_003956    | CH25H          | cholesterol 25-hydroxylase                                | ENST00000371852 | -0,973397044 |
| A_23_P11201   | NM_001097579 | GPR34          | G protein-coupled receptor 34                             | ENST00000535368 | -0,97404861  |
| A_33_P3226080 | NM_207103    | C17orf87       | chromosome 17 open reading frame 87                       | ENST00000399600 | -0,974479103 |
| A_33_P3407289 | NR_027436    | LOC283788      | FSHD region gene 1 pseudogene                             | ENST00000418749 | -0,974781632 |
| A_24_P234415  | NM_003149    | STAC           | SH3 and cysteine rich domain                              | ENST00000273183 | -0,975177915 |
| A_24_P124624  | NM_002543    | OLR1           | oxidized low density lipoprotein (lectin-like) receptor 1 | ENST00000309539 | -0,975467192 |
| A_24_P68783   | NM_012275    | IL36RN         | interleukin 36 receptor antagonist                        | ENST00000393200 | -0,976437765 |
| A_24_P79617   | NM_014656    | KIAA0040       | KIAA0040                                                  |                 | -0,97649053  |
| A_33_P3237977 | NM_197958    | LARP6          | La ribonucleoprotein domain family, member 6              | ENST00000344870 | -0,976743306 |
| A_23_P105465  | NM_004072    | CMKLR1         | chemokine-like receptor 1                                 | ENST00000550402 | -0,977127724 |
| A_23_P105465  | NM_004072    | CMKLR1         | chemokine-like receptor 1                                 | ENST00000550402 | -0,978948583 |
| A_23_P108823  | NM_032523    | OSBPL6         | oxysterol binding protein-like 6                          | ENST00000315022 | -0,980803142 |
| A_23_P153320  | NM_000201    | ICAM1          | intercellular adhesion molecule 1                         | ENST00000264832 | -0,983125608 |
| A_21_P0013512 | THC2568453   | XLOC_l2_014504 |                                                           |                 | -0,983193651 |
| A_23_P153320  | NM_000201    | ICAM1          | intercellular adhesion molecule 1                         | ENST00000264832 | -0,983219418 |
| A_32_P53524   | NM_004822    | NTN1           | netrin 1                                                  | ENST00000173229 | -0,985347883 |
| A_33_P3691916 | NM_014883    | FAM13A         | family with sequence similarity 13, member A              | ENST00000264344 | -0,985583641 |
| A_23_P105465  | NM_004072    | CMKLR1         | chemokine-like receptor 1                                 | ENST00000550402 | -0,985590945 |
| A_23_P103486  | NM_000775    | CYP2J2         | cytochrome P450, family 2, subfamily J, polypeptide 2     | ENST00000469406 | -0,986305343 |
| A_23_P104438  | NM_032578    | MYPN           | myopalladin                                               | ENST00000354393 | -0,986313215 |



|               |                 |              |                                                          |                 |              |
|---------------|-----------------|--------------|----------------------------------------------------------|-----------------|--------------|
| A_23_P24966   | NM_171997       | USP2         | ubiquitin specific peptidase 2                           | ENST00000525735 | -0,987226106 |
| A_32_P72110   | NM_006505       | PVR          | poliovirus receptor                                      | ENST00000344956 | -0,98741673  |
| A_33_P3247042 | NM_002030       | FPR3         | formyl peptide receptor 3                                | ENST00000339223 | -0,990225194 |
| A_24_P766716  | NM_001142343    | CMKLR1       | chemokine-like receptor 1                                | ENST00000312143 | -0,990353282 |
| A_23_P11201   | NM_001097579    | GPR34        | G protein-coupled receptor 34                            | ENST00000535368 | -0,990618601 |
| A_23_P1331    | NM_080801       | COL13A1      | collagen, type XIII, alpha 1                             | ENST00000478219 | -0,990984985 |
| A_23_P46482   | NM_018724       | IL20         | interleukin 20                                           | ENST00000367096 | -0,991590048 |
| A_33_P3282641 | NR_033752       | LOC344887    | NmrA-like family domain containing 1 pseudogene          | ENST00000416764 | -0,991697321 |
| A_23_P110196  | NM_016323       | HERC5        | hect domain and RLD 5                                    | ENST00000502913 | -0,993402051 |
| A_23_P250358  | NM_017912       | HERC6        | hect domain and RLD 6                                    | ENST00000511939 | -0,993425531 |
| A_24_P382187  | NM_001552       | IGFBP4       | insulin-like growth factor binding protein 4             | ENST00000269593 | -0,993808798 |
| A_21_P0009773 | TCONS_00027385  | XLOC_013370  |                                                          |                 | -0,994196769 |
| A_23_P105465  | NM_004072       | CMKLR1       | chemokine-like receptor 1                                | ENST00000550402 | -0,995066676 |
| A_33_P3232692 | NM_001185156    | IL24         | interleukin 24                                           | ENST00000294984 | -0,995819558 |
| A_23_P120467  | NM_199427       | ZFP64        | zinc finger protein 64 homolog (mouse)                   | ENST00000361387 | -0,996580024 |
| A_23_P108823  | NM_032523       | OSBPL6       | oxysterol binding protein-like 6                         | ENST00000315022 | -0,996884146 |
| A_33_P3363637 | NM_013314       | BLNK         | B-cell linker                                            | ENST00000393898 | -0,997575785 |
| A_23_P110196  | NM_016323       | HERC5        | hect domain and RLD 5                                    | ENST00000502913 | -0,998423427 |
| A_32_P54553   | ENST00000454608 | USP41        | ubiquitin specific peptidase 41                          | ENST00000454608 | -0,998821939 |
| A_33_P3276713 | NM_001010931    | HGF          | hepatocyte growth factor (hepapoietin A; scatter factor) | ENST00000394769 | -0,998915113 |
| A_33_P3398065 | NM_001003397    | TPD52L1      | tumor protein D52-like 1                                 | ENST00000392483 | -0,999022192 |
| A_23_P104438  | NM_032578       | MYPN         | myopalladin                                              | ENST00000354393 | -1,000173971 |
| A_33_P3295203 | NM_001523       | HAS1         | hyaluronan synthase 1                                    | ENST00000376737 | -1,000970432 |
| A_24_P472007  | NM_001080421    | UNC13A       | unc-13 homolog A (C. elegans)                            | ENST00000252773 | -1,001219035 |
| A_21_P0001111 | ENST00000440492 | XLOC_000755  |                                                          | ENST00000440492 | -1,003199468 |
| A_24_P64653   | NM_152637       | METTL7B      | methyltransferase like 7B                                | ENST00000394252 | -1,004363205 |
| A_33_P3385121 | AK127678        | LOC100129322 | uncharacterized LOC100129322                             |                 | -1,005313687 |
| A_24_P349039  | NM_020754       | ARHGAP31     | Rho GTPase activating protein 31                         | ENST00000264245 | -1,007956607 |
| A_23_P99452   | NM_000059       | BRCA2        | breast cancer 2, early onset                             | ENST00000380152 | -1,008157912 |

|               |                 |              |                                                                 |                 |              |
|---------------|-----------------|--------------|-----------------------------------------------------------------|-----------------|--------------|
| A_24_P309521  | NM_000890       | KCNJ5        | potassium inwardly-rectifying channel, subfamily J, member 5    | ENST00000529694 | -1,008357305 |
| A_23_P140384  | NM_001911       | CTSG         | cathepsin G                                                     | ENST00000216336 | -1,008805058 |
| A_23_P1331    | NM_080801       | COL13A1      | collagen, type XIII, alpha 1                                    | ENST00000478219 | -1,010945917 |
| A_23_P368067  | NM_018833       | TAP2         | transporter 2, ATP-binding cassette, sub-family B (MDR/TAP)     | ENST00000374899 | -1,013201982 |
| A_23_P110196  | NM_016323       | HERC5        | hect domain and RLD 5                                           | ENST00000502913 | -1,014072309 |
| A_21_P0009753 | THC2527567      | XLOC_013282  |                                                                 |                 | -1,014828075 |
| A_23_P154855  | NM_000219       | KCNE1        | potassium voltage-gated channel, Isk-related family, member 1   | ENST00000416357 | -1,015459421 |
| A_23_P27400   | NM_001523       | HAS1         | hyaluronan synthase 1                                           | ENST00000540069 | -1,015985367 |
| A_23_P127186  | NM_206862       | TACC2        | transforming, acidic coiled-coil containing protein 2           | ENST00000368997 | -1,016381745 |
| A_23_P12363   | NM_005012       | ROR1         | receptor tyrosine kinase-like orphan receptor 1                 | ENST00000545203 | -1,016716787 |
| A_24_P295877  | NM_014704       | CEP104       | centrosomal protein 104kDa                                      | ENST00000438539 | -1,01700818  |
| A_33_P3246580 | NM_020340       | KIAA1244     | KIAA1244                                                        | ENST00000367706 | -1,017063015 |
| A_21_P0000731 | NR_038236       | LOC100507632 | uncharacterized LOC100507632                                    | ENST00000499425 | -1,017288019 |
| A_23_P1331    | NM_080801       | COL13A1      | collagen, type XIII, alpha 1                                    | ENST00000478219 | -1,018343886 |
| A_21_P0001988 | ENST00000433724 | XLOC_001932  |                                                                 | ENST00000433724 | -1,018862666 |
| A_21_P0003757 | CR740121        | XLOC_004049  |                                                                 |                 | -1,019386217 |
| A_32_P167471  | NM_024734       | CLMN         | calmin (calponin-like, transmembrane)                           |                 | -1,019870503 |
| A_23_P110941  | NM_001512       | GSTA4        | glutathione S-transferase alpha 4                               | ENST00000370960 | -1,024661314 |
| A_24_P153568  | NM_001039396    | MPEG1        | macrophage expressed 1                                          | ENST00000361050 | -1,024762392 |
| A_23_P46871   | NM_018344       | SLC29A3      | solute carrier family 29 (nucleoside transporters), member 3    | ENST00000373189 | -1,025879058 |
| A_33_P3416937 | ENST00000374624 | FAM206A      | family with sequence similarity 206, member A                   | ENST00000374624 | -1,025880413 |
| A_23_P35871   | NM_024680       | E2F8         | E2F transcription factor 8                                      | ENST00000396159 | -1,026245438 |
| A_33_P3531206 | NM_001014442    | C1QTNF9B-AS1 | C1QTNF9B antisense RNA 1 (non-protein coding)                   | ENST00000417034 | -1,026327041 |
| A_23_P112554  | NM_001855       | COL15A1      | collagen, type XV, alpha 1                                      | ENST00000375001 | -1,027411329 |
| A_23_P83200   | NM_152572       | AK8          | adenylate kinase 8                                              | ENST00000467161 | -1,027838314 |
| A_23_P333498  | NM_030636       | EEPD1        | endonuclease/exonuclease/phosphatase family domain containing 1 | ENST00000242108 | -1,029963435 |
| A_23_P301521  | NM_020848       | KIAA1462     | KIAA1462                                                        | ENST00000375377 | -1,030349219 |
| A_32_P9543    | NM_145699       | APOBEC3A     | apolipoprotein B mRNA editing enzyme, catalytic polypeptide 3A  | ENST00000402255 | -1,030566703 |
| A_24_P219114  | NM_005065       | SEL1L        | sel-1 suppressor of lin-12-like (C. elegans)                    | ENST00000336735 | -1,031523484 |

|                |                  |                |                                                               |                 |              |
|----------------|------------------|----------------|---------------------------------------------------------------|-----------------|--------------|
| A_33_P3272291  | NM_001818        | AKR1C4         | aldo-keto reductase family 1, member C4 (chlordecone red      | ENST00000397357 | -1,0317229   |
| A_33_P3381671  | BC016366         | LOC731424      | uncharacterized LOC731424                                     |                 | -1,03211281  |
| A_23_P64611    | NM_176798        | P2RY6          | pyrimidnergic receptor P2Y, G-protein coupled, 6              | ENST00000538328 | -1,033355603 |
| A_21_P0004540  | TCONS_00010837   | XLOC_004644    |                                                               |                 | -1,033744311 |
| A_24_P299685   | NM_198389        | PDPN           | podoplanin                                                    | ENST00000487038 | -1,03656792  |
| A_21_P0007219  | TCONS_00019322   | XLOC_009167    |                                                               |                 | -1,036796447 |
| A_23_P110196   | NM_016323        | HERC5          | hect domain and RLD 5                                         | ENST00000502913 | -1,037026416 |
| A_24_P323148   | NM_182573        | LYPD5          | LY6/PLAUR domain containing 5                                 | ENST00000377950 | -1,037542925 |
| A_23_P206359   | NM_004360        | CDH1           | cadherin 1, type 1, E-cadherin (epithelial)                   | ENST00000261769 | -1,039362864 |
| A_23_P167599   | NM_001034850     | FAM134B        | family with sequence similarity 134, member B                 | ENST00000306320 | -1,039788196 |
| A_23_P422981   | NM_174899        | FBXO36         | F-box protein 36                                              | ENST00000283946 | -1,039893995 |
| A_33_P3224803  | NM_000265        | NCF1           | neutrophil cytosolic factor 1                                 | ENST00000438106 | -1,040104425 |
| A_23_P17354    | NM_024034        | GDAP1L1        | ganglioside-induced differentiation-associated protein 1-like | ENST00000438466 | -1,040575087 |
| A_23_P105465   | NM_004072        | CMKLR1         | chemokine-like receptor 1                                     | ENST00000550402 | -1,041370871 |
| A_21_P0013514  | TCONS_I2_0002818 | XLOC_I2_014504 |                                                               |                 | -1,042668618 |
| A_23_P67042    | NM_017947        | MOCOS          | molybdenum cofactor sulfurase                                 | ENST00000261326 | -1,042709502 |
| A_33_P3258392  | NM_001955        | EDN1           | endothelin 1                                                  | ENST00000379375 | -1,042962812 |
| A_33_P3363188  | NR_033856        | FLJ43315       | asparagine synthetase pseudogene                              |                 | -1,043732972 |
| A_23_P143621   | NM_001887        | CRYBB1         | crystallin, beta B1                                           | ENST00000215939 | -1,046275712 |
| A_23_P12363    | NM_005012        | ROR1           | receptor tyrosine kinase-like orphan receptor 1               | ENST00000545203 | -1,047253353 |
| A_23_P253692   | NM_001079858     | GPR64          | G protein-coupled receptor 64                                 | ENST00000356606 | -1,047255091 |
| A_21_P0008360  | TCONS_00022563   | XLOC_010881    |                                                               |                 | -1,047373182 |
| A_24_P626850   | NM_004285        | H6PD           | hexose-6-phosphate dehydrogenase (glucose 1-dehydroger        | ENST00000377403 | -1,048182261 |
| A_33_P3391290  | NM_001142483     | C5orf13        | chromosome 5 open reading frame 13                            | ENST00000507742 | -1,048468536 |
| A_19_P00319917 | NR_038956        | LOC100506714   | uncharacterized LOC100506714                                  |                 | -1,049762779 |
| A_24_P278126   | NM_002485        | NBN            | nibrin                                                        | ENST00000396252 | -1,050289311 |
| A_32_P160045   | NM_152665        | TCTEX1D1       | Tctex1 domain containing 1                                    | ENST00000282670 | -1,051187861 |
| A_23_P12554    | NM_016112        | PKD2L1         | polycystic kidney disease 2-like 1                            | ENST00000318222 | -1,052815456 |
| A_23_P62647    | NM_003037        | SLAMF1         | signaling lymphocytic activation molecule family member 1     | ENST00000392208 | -1,055416762 |

|               |                                 |              |                                                            |                 |              |
|---------------|---------------------------------|--------------|------------------------------------------------------------|-----------------|--------------|
| A_23_P320113  | NM_080725                       | SRXN1        | sulfiredoxin 1                                             | ENST00000427916 | -1,056332241 |
| A_33_P3335725 | NM_000208                       | INSR         | insulin receptor                                           | ENST00000302850 | -1,05637993  |
| A_21_P0005189 | XR_108720                       | LOC100507642 | uncharacterized LOC100507642                               |                 | -1,058245436 |
| A_21_P0009752 | TCONS_00027258                  | XLOC_013282  |                                                            |                 | -1,059347004 |
| A_23_P64828   | NM_002534                       | OAS1         | 2'-5'-oligoadenylate synthetase 1, 40/46kDa                | ENST00000377508 | -1,059444965 |
| A_23_P9883    | NM_001079821                    | NLRP3        | NLR family, pyrin domain containing 3                      | ENST00000336119 | -1,060074073 |
| A_24_P363548  | NM_005338                       | HIP1         | huntingtin interacting protein 1                           | ENST00000336926 | -1,063678109 |
| A_23_P256956  | NM_005733                       | KIF20A       | kinesin family member 20A                                  | ENST00000502338 | -1,064327787 |
| A_23_P300033  | NM_006206                       | PDGFRA       | platelet-derived growth factor receptor, alpha polypeptide | ENST00000257290 | -1,064368999 |
| A_21_P0013590 | XR_108989                       | LOC100507540 | uncharacterized LOC100507540                               |                 | -1,065016846 |
| A_23_P302672  | BC013592                        | DDIT4L       | DNA-damage-inducible transcript 4-like                     |                 | -1,067217862 |
| A_32_P206839  | NR_037631                       | LOC100288911 | uncharacterized LOC100288911                               |                 | -1,068522283 |
| A_33_P3376965 | NM_024111                       | CHAC1        | ChaC, cation transport regulator homolog 1 (E. coli)       | ENST00000487220 | -1,069254353 |
| A_21_P0000607 | NR_033839                       | FLJ39051     | uncharacterized LOC399972                                  |                 | -1,069591126 |
| A_23_P18684   | NM_004362                       | CLGN         | calmegin                                                   | ENST00000545667 | -1,070596359 |
| A_33_P3350508 | NM_001080432                    | FTO          | fat mass and obesity associated                            | ENST00000460382 | -1,071817452 |
| A_33_P3413558 | NM_006566                       | CD226        | CD226 molecule                                             | ENST00000280200 | -1,075019354 |
| A_21_P0010537 | TCONS_I2_0000039(XLOC_I2_000297 |              |                                                            |                 | -1,075526389 |
| A_33_P3319925 | ENST00000449753                 | IRG1         | immunoresponsive 1 homolog (mouse)                         | ENST00000449753 | -1,079124246 |
| A_21_P0007119 | NR_033847                       | FLJ37035     | uncharacterized LOC399821                                  | ENST00000527483 | -1,0797259   |
| A_23_P112554  | NM_001855                       | COL15A1      | collagen, type XV, alpha 1                                 | ENST00000375001 | -1,080966252 |
| A_24_P152968  | NM_001353                       | AKR1C1       | aldo-keto reductase family 1, member C1 (dihydrodiol dehy  | ENST00000434459 | -1,081388921 |
| A_21_P0012418 | TCONS_I2_0001904(XLOC_I2_010029 |              |                                                            |                 | -1,082815629 |
| A_23_P125680  | NM_017938                       | FAM70A       | family with sequence similarity 70, member A               | ENST00000440464 | -1,084773257 |
| A_23_P67042   | NM_017947                       | MOCOS        | molybdenum cofactor sulfurase                              | ENST00000261326 | -1,084854129 |
| A_23_P118834  | NM_001067                       | TOP2A        | topoisomerase (DNA) II alpha 170kDa                        | ENST00000269577 | -1,086080744 |
| A_24_P107317  | NM_004205                       | USP2         | ubiquitin specific peptidase 2                             | ENST00000260187 | -1,086391589 |
| A_23_P99452   | NM_000059                       | BRCA2        | breast cancer 2, early onset                               | ENST00000380152 | -1,088347093 |
| A_24_P270829  | NM_000173                       | GP1BA        | glycoprotein Ib (platelet), alpha polypeptide              | ENST00000438881 | -1,08991797  |

|               |                  |                |                                                                    |                 |              |
|---------------|------------------|----------------|--------------------------------------------------------------------|-----------------|--------------|
| A_23_P55998   | NM_005628        | SLC1A5         | solute carrier family 1 (neutral amino acid transporter), member 5 | ENST00000306894 | -1,091129178 |
| A_23_P51085   | NM_020675        | SPC25          | SPC25, NDC80 kinetochore complex component, homolog (1)            | ENST00000282074 | -1,092264138 |
| A_33_P3372099 | NM_145244        | DDIT4L         | DNA-damage-inducible transcript 4-like                             | ENST00000273990 | -1,093623517 |
| A_23_P73837   | NM_138636        | TLR8           | toll-like receptor 8                                               | ENST00000218032 | -1,09607511  |
| A_24_P411749  | NM_020455        | GPR126         | G protein-coupled receptor 126                                     | ENST00000367609 | -1,097408969 |
| A_21_P0013475 | TCONS_I2_0002773 | XLOC_I2_014191 |                                                                    |                 | -1,09813737  |
| A_24_P235266  | NM_001001555     | GRB10          | growth factor receptor-bound protein 10                            | ENST00000403097 | -1,099250473 |
| A_23_P150903  | NM_018099        | FAR2           | fatty acyl CoA reductase 2                                         | ENST00000182377 | -1,102297693 |
| A_21_P0014938 | XR_133412        | LOC100505813   | uncharacterized LOC100505813                                       |                 | -1,105383662 |
| A_33_P3418170 | NM_014314        | DDX58          | DEAD (Asp-Glu-Ala-Asp) box polypeptide 58                          | ENST00000379882 | -1,10819875  |
| A_23_P206359  | NM_004360        | CDH1           | cadherin 1, type 1, E-cadherin (epithelial)                        | ENST00000261769 | -1,108208397 |
| A_32_P96000   | NM_001004341     | ETV3L          | ets variant 3-like                                                 | ENST00000454449 | -1,108473641 |
| A_23_P85240   | NM_016562        | TLR7           | toll-like receptor 7                                               | ENST00000380659 | -1,108877469 |
| A_33_P3284508 | NM_001174104     | CD14           | CD14 molecule                                                      | ENST00000302014 | -1,113502848 |
| A_33_P3340769 | NM_003816        | ADAM9          | ADAM metallopeptidase domain 9                                     |                 | -1,114864609 |
| A_23_P206359  | NM_004360        | CDH1           | cadherin 1, type 1, E-cadherin (epithelial)                        | ENST00000261769 | -1,115118677 |
| A_21_P0010773 | NR_033856        | FLJ43315       | asparagine synthetase pseudogene                                   | ENST00000416367 | -1,118123907 |
| A_33_P3258346 | NM_017523        | XAF1           | XIAP associated factor 1                                           | ENST00000361842 | -1,120002719 |
| A_21_P0008673 | TCONS_00023505   | XLOC_011350    |                                                                    |                 | -1,121183016 |
| A_21_P0013808 | THC2666070       | XLOC_I2_015673 |                                                                    |                 | -1,121372827 |
| A_23_P360754  | NM_005099        | ADAMTS4        | ADAM metallopeptidase with thrombospondin type 1 motif 4           | ENST00000367996 | -1,122998808 |
| A_32_P151800  | NM_207418        | FAM72D         | family with sequence similarity 72, member D                       | ENST00000341209 | -1,123405647 |
| A_33_P3235546 | NM_014747        | RIMS3          | regulating synaptic membrane exocytosis 3                          | ENST00000372683 | -1,123915661 |
| A_24_P557479  | NM_017523        | XAF1           | XIAP associated factor 1                                           | ENST00000361842 | -1,124653487 |
| A_23_P67042   | NM_017947        | MOCOS          | molybdenum cofactor sulfurase                                      | ENST00000261326 | -1,125308882 |
| A_21_P0009165 | ENST00000444464  | XLOC_012170    |                                                                    | ENST00000444464 | -1,12679434  |
| A_23_P210690  | NM_021158        | TRIB3          | tribbles homolog 3 (Drosophila)                                    | ENST00000217233 | -1,128520179 |
| A_23_P12363   | NM_005012        | ROR1           | receptor tyrosine kinase-like orphan receptor 1                    | ENST00000545203 | -1,130692561 |
| A_23_P105465  | NM_004072        | CMKLR1         | chemokine-like receptor 1                                          | ENST00000550402 | -1,132294047 |



|               |                 |               |                                                              |                 |              |
|---------------|-----------------|---------------|--------------------------------------------------------------|-----------------|--------------|
| A_33_P3376947 | ENST00000537276 | ABCB9         | ATP-binding cassette, sub-family B (MDR/TAP), member 9       | ENST00000537276 | -1,134766557 |
| A_23_P67042   | NM_017947       | MOCOS         | molybdenum cofactor sulfurase                                | ENST00000261326 | -1,138026746 |
| A_33_P3326387 | NM_173463       | CCDC149       | coiled-coil domain containing 149                            | ENST00000382116 | -1,138515451 |
| A_23_P37892   | NM_133443       | GPT2          | glutamic pyruvate transaminase (alanine aminotransferase)    | ENST00000440783 | -1,140055703 |
| A_33_P3399090 | NM_001037954    | DIXDC1        | DIX domain containing 1                                      | ENST00000440460 | -1,141493355 |
| A_33_P3291484 | NM_005668       | ST8SIA4       | ST8 alpha-N-acetyl-neuraminide alpha-2,8-sialyltransferase 4 |                 | -1,14165771  |
| A_32_P71571   | NM_182522       | FAM19A4       | family with sequence similarity 19 (chemokine (C-C motif)-li | ENST00000295569 | -1,142435705 |
| A_23_P425304  | NM_016169       | SUFU          | suppressor of fused homolog (Drosophila)                     | ENST00000369902 | -1,143569943 |
| A_21_P0014592 | XR_110434       | LOC100507575  | uncharacterized LOC100507575                                 |                 | -1,144609316 |
| A_23_P105465  | NM_004072       | CMKLR1        | chemokine-like receptor 1                                    | ENST00000550402 | -1,14483812  |
| A_32_P526255  | NM_001145717    | PNPLA1        | patatin-like phospholipase domain containing 1               | ENST00000457797 | -1,148077545 |
| A_24_P276576  | NM_032738       | FCRLA         | Fc receptor-like A                                           | ENST00000367950 | -1,148464503 |
| A_23_P112026  | NM_002164       | IDO1          | indoleamine 2,3-dioxygenase 1                                | ENST00000523779 | -1,152751308 |
| A_23_P105465  | NM_004072       | CMKLR1        | chemokine-like receptor 1                                    | ENST00000550402 | -1,155586283 |
| A_24_P112941  | NM_032808       | LINGO1        | leucine rich repeat and Ig domain containing 1               | ENST00000355300 | -1,155801103 |
| A_33_P3413989 | NM_000062       | SERPING1      | serpin peptidase inhibitor, clade G (C1 inhibitor), member 1 | ENST00000405496 | -1,158986711 |
| A_23_P337934  | NM_017556       | FBLIM1        | filamin binding LIM protein 1                                | ENST00000400773 | -1,159047628 |
| A_33_P3567892 | AL050263        | DKFZP547J0410 | DKFZP547J0410 protein                                        |                 | -1,159249742 |
| A_21_P0014351 | ENST00000451140 | LOC100506325  |                                                              | ENST00000451140 | -1,160006667 |
| A_23_P214821  | NM_001955       | EDN1          | endothelin 1                                                 | ENST00000379375 | -1,160695238 |
| A_24_P225616  | NM_001034       | RRM2          | ribonucleotide reductase M2                                  | ENST00000304567 | -1,167942606 |
| A_33_P3401826 | NM_207315       | CMPK2         | cytidine monophosphate (UMP-CMP) kinase 2, mitochondri       | ENST00000478738 | -1,168995498 |
| A_33_P3220470 | NM_005585       | SMAD6         | SMAD family member 6                                         | ENST00000338426 | -1,170596341 |
| A_23_P121106  | NM_003865       | HESX1         | HESX homeobox 1                                              | ENST00000295934 | -1,17275947  |
| A_23_P52266   | NM_001548       | IFIT1         | interferon-induced protein with tetratricopeptide repeats 1  | ENST00000546318 | -1,178951771 |
| A_33_P3415097 | NM_001830       | CLCN4         | chloride channel 4                                           | ENST00000380833 | -1,179023151 |
| A_24_P787897  | NM_022166       | XYLT1         | xylosyltransferase I                                         |                 | -1,180801743 |
| A_23_P112026  | NM_002164       | IDO1          | indoleamine 2,3-dioxygenase 1                                | ENST00000523779 | -1,181715059 |
| A_23_P256956  | NM_005733       | KIF20A        | kinesin family member 20A                                    | ENST00000502338 | -1,182814135 |

|               |                |              |                                                            |                 |              |
|---------------|----------------|--------------|------------------------------------------------------------|-----------------|--------------|
| A_23_P94338   | NM_006209      | ENPP2        | ectonucleotide pyrophosphatase/phosphodiesterase 2         | ENST00000522826 | -1,184174141 |
| A_23_P206359  | NM_004360      | CDH1         | cadherin 1, type 1, E-cadherin (epithelial)                | ENST00000261769 | -1,187836783 |
| A_23_P12363   | NM_005012      | ROR1         | receptor tyrosine kinase-like orphan receptor 1            | ENST00000545203 | -1,188544821 |
| A_23_P82868   | NM_000930      | PLAT         | plasminogen activator, tissue                              | ENST00000352041 | -1,189730096 |
| A_23_P49448   | NM_024306      | FA2H         | fatty acid 2-hydroxylase                                   | ENST00000219368 | -1,190112976 |
| A_23_P11201   | NM_001097579   | GPR34        | G protein-coupled receptor 34                              | ENST00000535368 | -1,190963861 |
| A_33_P3281695 | NM_001243133   | NLRP3        | NLR family, pyrin domain containing 3                      | ENST00000391827 | -1,193608605 |
| A_24_P105391  | NM_001017922   | ERMAP        | erythroblast membrane-associated protein (Scianna blood §  | ENST00000372517 | -1,194121776 |
| A_33_P3284933 | NM_145659      | IL27         | interleukin 27                                             | ENST00000356897 | -1,194482507 |
| A_33_P3293446 | NM_020848      | KIAA1462     | KIAA1462                                                   | ENST00000375377 | -1,195597255 |
| A_24_P322354  | NM_001039535   | SKA1         | spindle and kinetochore associated complex subunit 1       | ENST00000398452 | -1,198756102 |
| A_23_P112026  | NM_002164      | IDO1         | indoleamine 2,3-dioxygenase 1                              | ENST00000523779 | -1,19982118  |
| A_24_P49199   | NM_181789      | GLDN         | gliomedin                                                  | ENST00000396399 | -1,200198062 |
| A_23_P105465  | NM_004072      | CMKLR1       | chemokine-like receptor 1                                  | ENST00000550402 | -1,200591721 |
| A_23_P12363   | NM_005012      | ROR1         | receptor tyrosine kinase-like orphan receptor 1            | ENST00000545203 | -1,201407437 |
| A_23_P12363   | NM_005012      | ROR1         | receptor tyrosine kinase-like orphan receptor 1            | ENST00000545203 | -1,203917196 |
| A_23_P256956  | NM_005733      | KIF20A       | kinesin family member 20A                                  | ENST00000502338 | -1,204686377 |
| A_33_P3239282 | NM_004974      | KCNA2        | potassium voltage-gated channel, shaker-related subfamily, | ENST00000316361 | -1,205483428 |
| A_23_P82868   | NM_000930      | PLAT         | plasminogen activator, tissue                              | ENST00000352041 | -1,205734242 |
| A_33_P3406816 | XM_001127163   | LOC728316    | uncharacterized LOC728316                                  |                 | -1,206276187 |
| A_23_P214821  | NM_001955      | EDN1         | endothelin 1                                               | ENST00000379375 | -1,208490549 |
| A_23_P112026  | NM_002164      | IDO1         | indoleamine 2,3-dioxygenase 1                              | ENST00000523779 | -1,208807126 |
| A_33_P3276918 | NM_001195228   | FAM64A       | family with sequence similarity 64, member A               | ENST00000250056 | -1,208871529 |
| A_23_P112026  | NM_002164      | IDO1         | indoleamine 2,3-dioxygenase 1                              | ENST00000523779 | -1,211806113 |
| A_21_P0006605 | TCONS_00017645 | XLOC_008317  |                                                            |                 | -1,212031679 |
| A_33_P3479449 | AK055877       | LOC100506328 | uncharacterized LOC100506328                               |                 | -1,212277257 |
| A_23_P112026  | NM_002164      | IDO1         | indoleamine 2,3-dioxygenase 1                              | ENST00000523779 | -1,213852142 |
| A_23_P214821  | NM_001955      | EDN1         | endothelin 1                                               | ENST00000379375 | -1,214987978 |
| A_33_P3324004 | NM_032965      | CCL15        | chemokine (C-C motif) ligand 15                            | ENST00000354059 | -1,215536116 |

|               |                 |             |                                                          |                 |              |
|---------------|-----------------|-------------|----------------------------------------------------------|-----------------|--------------|
| A_23_P112026  | NM_002164       | IDO1        | indoleamine 2,3-dioxygenase 1                            | ENST00000523779 | -1,217842261 |
| A_23_P214821  | NM_001955       | EDN1        | endothelin 1                                             | ENST00000379375 | -1,218398608 |
| A_23_P112026  | NM_002164       | IDO1        | indoleamine 2,3-dioxygenase 1                            | ENST00000523779 | -1,220344313 |
| A_23_P214821  | NM_001955       | EDN1        | endothelin 1                                             | ENST00000379375 | -1,222094112 |
| A_23_P214821  | NM_001955       | EDN1        | endothelin 1                                             | ENST00000379375 | -1,222741857 |
| A_23_P112026  | NM_002164       | IDO1        | indoleamine 2,3-dioxygenase 1                            | ENST00000523779 | -1,222822595 |
| A_23_P112026  | NM_002164       | IDO1        | indoleamine 2,3-dioxygenase 1                            | ENST00000523779 | -1,223839142 |
| A_23_P82868   | NM_000930       | PLAT        | plasminogen activator, tissue                            | ENST00000352041 | -1,223934454 |
| A_23_P82868   | NM_000930       | PLAT        | plasminogen activator, tissue                            | ENST00000352041 | -1,224521205 |
| A_33_P3385266 | NM_001079528    | ABCC6       | ATP-binding cassette, sub-family C (CFTR/MRP), member 6  |                 | -1,227473739 |
| A_33_P3421728 | NM_001346       | DGKG        | diacylglycerol kinase, gamma 90kDa                       | ENST00000265022 | -1,228260675 |
| A_24_P305570  | NM_018993       | RIN2        | Ras and Rab interactor 2                                 | ENST00000255006 | -1,232723803 |
| A_33_P3281283 | NM_005226       | S1PR3       | sphingosine-1-phosphate receptor 3                       | ENST00000375846 | -1,233277942 |
| A_23_P108823  | NM_032523       | OSBPL6      | oxysterol binding protein-like 6                         | ENST00000315022 | -1,234202296 |
| A_24_P942321  | NM_018027       | FRMD4A      | FERM domain containing 4A                                | ENST00000357447 | -1,234568302 |
| A_24_P411186  | NM_022893       | BCL11A      | B-cell CLL/lymphoma 11A (zinc finger protein)            | ENST00000335712 | -1,235870696 |
| A_23_P214821  | NM_001955       | EDN1        | endothelin 1                                             | ENST00000379375 | -1,243237197 |
| A_21_P0009825 | ENST00000449270 | XLOC_013457 |                                                          | ENST00000449270 | -1,244343347 |
| A_33_P3321697 | NM_022140       | EPB41L4A    | erythrocyte membrane protein band 4.1 like 4A            | ENST00000261486 | -1,246432276 |
| A_23_P164773  | NM_002002       | FCER2       | Fc fragment of IgE, low affinity II, receptor for (CD23) | ENST00000346664 | -1,249616438 |
| A_23_P214821  | NM_001955       | EDN1        | endothelin 1                                             | ENST00000379375 | -1,251690763 |
| A_23_P256956  | NM_005733       | KIF20A      | kinesin family member 20A                                | ENST00000502338 | -1,256060285 |
| A_23_P11201   | NM_001097579    | GPR34       | G protein-coupled receptor 34                            | ENST00000535368 | -1,256793629 |
| A_23_P82868   | NM_000930       | PLAT        | plasminogen activator, tissue                            | ENST00000352041 | -1,257166553 |
| A_21_P0011933 | NR_037597       | LOC442028   | uncharacterized LOC442028                                |                 | -1,260447754 |
| A_32_P59010   | NM_207381       | TNFAIP8L3   | tumor necrosis factor, alpha-induced protein 8-like 3    | ENST00000327536 | -1,266759301 |
| A_23_P17481   | NM_023068       | SIGLEC1     | sialic acid binding Ig-like lectin 1, sialoadhesin       | ENST00000202578 | -1,267517548 |
| A_23_P12363   | NM_005012       | ROR1        | receptor tyrosine kinase-like orphan receptor 1          | ENST00000545203 | -1,267711363 |
| A_23_P55649   | NM_001462       | FPR2        | formyl peptide receptor 2                                | ENST00000340023 | -1,268678488 |

|                |                 |             |                                                                       |                 |              |
|----------------|-----------------|-------------|-----------------------------------------------------------------------|-----------------|--------------|
| A_24_P188800   | NM_017923       | Mar-01      | membrane-associated ring finger (C3HC4) 1                             | ENST00000339875 | -1,270376717 |
| A_23_P82868    | NM_000930       | PLAT        | plasminogen activator, tissue                                         | ENST00000352041 | -1,276294418 |
| A_32_P108254   | NM_017565       | FAM20A      | family with sequence similarity 20, member A                          | ENST00000375556 | -1,279080897 |
| A_33_P3402489  | NM_006187       | OAS3        | 2'-5'-oligoadenylate synthetase 3, 100kDa                             | ENST00000228928 | -1,27952599  |
| A_23_P6263     | NM_002463       | MX2         | myxovirus (influenza virus) resistance 2 (mouse)                      | ENST00000330714 | -1,282246914 |
| A_23_P12363    | NM_005012       | ROR1        | receptor tyrosine kinase-like orphan receptor 1                       | ENST00000545203 | -1,28298167  |
| A_23_P139786   | NM_003733       | OASL        | 2'-5'-oligoadenylate synthetase-like                                  | ENST00000257570 | -1,283655009 |
| A_23_P214821   | NM_001955       | EDN1        | endothelin 1                                                          | ENST00000379375 | -1,283722123 |
| A_23_P82868    | NM_000930       | PLAT        | plasminogen activator, tissue                                         | ENST00000352041 | -1,288526991 |
| A_33_P3408152  | NM_021076       | NEFH        | neurofilament, heavy polypeptide                                      | ENST00000328842 | -1,289029139 |
| A_33_P3288159  | NM_018136       | ASPM        | asp (abnormal spindle) homolog, microcephaly associated (             | ENST00000294732 | -1,293050313 |
| A_33_P3334908  | NM_145177       | DHRXS       | dehydrogenase/reductase (SDR family) X-linked                         | ENST00000334651 | -1,293411749 |
| A_19_P00808588 | NR_003133       | GBP1P1      |                                                                       | ENST00000513638 | -1,294961913 |
| A_23_P121106   | NM_003865       | HESX1       | HESX homeobox 1                                                       | ENST00000295934 | -1,295625215 |
| A_33_P3705884  | AK094188        | LOC148189   | uncharacterized LOC148189                                             |                 | -1,29642001  |
| A_23_P82868    | NM_000930       | PLAT        | plasminogen activator, tissue                                         | ENST00000352041 | -1,300209852 |
| A_23_P407096   | NM_152625       | ZNF366      | zinc finger protein 366                                               | ENST00000318442 | -1,300853087 |
| A_23_P132159   | NM_017414       | USP18       | ubiquitin specific peptidase 18                                       | ENST00000215794 | -1,301224837 |
| A_23_P11201    | NM_001097579    | GPR34       | G protein-coupled receptor 34                                         | ENST00000535368 | -1,30375373  |
| A_23_P119835   | NM_021209       | NLRC4       | NLR family, CARD domain containing 4                                  | ENST00000404025 | -1,305173711 |
| A_23_P82868    | NM_000930       | PLAT        | plasminogen activator, tissue                                         | ENST00000352041 | -1,30585507  |
| A_23_P11201    | NM_001097579    | GPR34       | G protein-coupled receptor 34                                         | ENST00000535368 | -1,3068146   |
| A_23_P214821   | NM_001955       | EDN1        | endothelin 1                                                          | ENST00000379375 | -1,312058726 |
| A_21_P0000695  | NR_037867       | LOC731424   | uncharacterized LOC731424                                             |                 | -1,313382098 |
| A_21_P0001225  | ENST00000433576 | XLOC_001214 |                                                                       | ENST00000433576 | -1,316995936 |
| A_24_P362540   | NM_003887       | ASAP2       | ArfGAP with SH3 domain, ankyrin repeat and PH domain 2                | ENST00000484590 | -1,317119492 |
| A_23_P391443   | NM_020700       | PPM1H       | protein phosphatase, Mg <sup>2+</sup> /Mn <sup>2+</sup> dependent, 1H | ENST00000228705 | -1,318040074 |
| A_23_P12363    | NM_005012       | ROR1        | receptor tyrosine kinase-like orphan receptor 1                       | ENST00000545203 | -1,32108092  |
| A_33_P3380383  | NM_001099221    | TIFAB       | TRAF-interacting protein with forkhead-associated domain,             | ENST00000537858 | -1,329705625 |

|               |                  |                |                                                             |                 |              |
|---------------|------------------|----------------|-------------------------------------------------------------|-----------------|--------------|
| A_23_P358917  | NM_000765        | CYP3A7         | cytochrome P450, family 3, subfamily A, polypeptide 7       | ENST00000336374 | -1,332286973 |
| A_23_P161698  | NM_002422        | MMP3           | matrix metalloproteinase 3 (stromelysin 1, progelatinase)   | ENST00000299855 | -1,334056386 |
| A_23_P12363   | NM_005012        | ROR1           | receptor tyrosine kinase-like orphan receptor 1             | ENST00000545203 | -1,334129442 |
| A_33_P3228460 | NM_001136007     | FXYD3          | FXYD domain containing ion transport regulator 3            | ENST00000535103 | -1,338352893 |
| A_24_P592012  | NM_025224        | ZBTB46         | zinc finger and BTB domain containing 46                    | ENST00000245663 | -1,339688399 |
| A_23_P11201   | NM_001097579     | GPR34          | G protein-coupled receptor 34                               | ENST00000535368 | -1,344762349 |
| A_23_P256956  | NM_005733        | KIF20A         | kinesin family member 20A                                   | ENST00000502338 | -1,346157916 |
| A_23_P79518   | NM_000576        | IL1B           | interleukin 1, beta                                         | ENST00000263341 | -1,347946842 |
| A_33_P3407013 | ENST00000420258  | IL6            | interleukin 6 (interferon, beta 2)                          | ENST00000420258 | -1,348821276 |
| A_23_P79518   | NM_000576        | IL1B           | interleukin 1, beta                                         | ENST00000263341 | -1,350158051 |
| A_23_P71037   | NM_000600        | IL6            | interleukin 6 (interferon, beta 2)                          | ENST00000485300 | -1,352431672 |
| A_23_P79518   | NM_000576        | IL1B           | interleukin 1, beta                                         | ENST00000263341 | -1,353323012 |
| A_21_P0013592 | TCONS_I2_0002883 | XLOC_I2_014850 |                                                             |                 | -1,354745637 |
| A_23_P67042   | NM_017947        | MOCOS          | molybdenum cofactor sulfurase                               | ENST00000261326 | -1,356558168 |
| A_23_P155351  | NM_000060        | BTD            | biotinidase                                                 | ENST00000383778 | -1,359133361 |
| A_24_P304071  | NM_001547        | IFIT2          | interferon-induced protein with tetratricopeptide repeats 2 | ENST00000371826 | -1,360719864 |
| A_23_P79518   | NM_000576        | IL1B           | interleukin 1, beta                                         | ENST00000263341 | -1,36206358  |
| A_23_P79518   | NM_000576        | IL1B           | interleukin 1, beta                                         | ENST00000263341 | -1,363296501 |
| A_23_P256956  | NM_005733        | KIF20A         | kinesin family member 20A                                   | ENST00000502338 | -1,365661473 |
| A_23_P79518   | NM_000576        | IL1B           | interleukin 1, beta                                         | ENST00000263341 | -1,367133571 |
| A_23_P82868   | NM_000930        | PLAT           | plasminogen activator, tissue                               | ENST00000352041 | -1,367547741 |
| A_23_P79518   | NM_000576        | IL1B           | interleukin 1, beta                                         | ENST00000263341 | -1,368879255 |
| A_23_P67042   | NM_017947        | MOCOS          | molybdenum cofactor sulfurase                               | ENST00000261326 | -1,371320641 |
| A_23_P67042   | NM_017947        | MOCOS          | molybdenum cofactor sulfurase                               | ENST00000261326 | -1,377086495 |
| A_23_P79518   | NM_000576        | IL1B           | interleukin 1, beta                                         | ENST00000263341 | -1,391631735 |
| A_23_P256956  | NM_005733        | KIF20A         | kinesin family member 20A                                   | ENST00000502338 | -1,392001056 |
| A_23_P79518   | NM_000576        | IL1B           | interleukin 1, beta                                         | ENST00000263341 | -1,392104651 |
| A_33_P3588134 | NM_052839        | PANX2          | pannexin 2                                                  | ENST00000401643 | -1,397032288 |
| A_23_P79518   | NM_000576        | IL1B           | interleukin 1, beta                                         | ENST00000263341 | -1,403808016 |



|               |              |         |                                                             |                 |              |
|---------------|--------------|---------|-------------------------------------------------------------|-----------------|--------------|
| A_33_P3880302 | NM_004442    | EPHB2   | EPH receptor B2                                             | ENST00000374632 | -1,406246142 |
| A_23_P150316  | NM_002426    | MMP12   | matrix metalloproteinase 12 (macrophage elastase)           |                 | -1,419764898 |
| A_23_P121253  | NM_003810    | TNFSF10 | tumor necrosis factor (ligand) superfamily, member 10       | ENST00000241261 | -1,427439447 |
| A_23_P257815  | NM_005582    | CD180   | CD180 molecule                                              | ENST00000256447 | -1,433098087 |
| A_21_P0010626 | NM_058179    | PSAT1   | phosphoserine aminotransferase 1                            | ENST00000421149 | -1,434836078 |
| A_23_P125278  | NM_005409    | CXCL11  | chemokine (C-X-C motif) ligand 11                           | ENST00000306621 | -1,437455614 |
| A_23_P121106  | NM_003865    | HESX1   | HESX homeobox 1                                             | ENST00000295934 | -1,441220526 |
| A_23_P204087  | NM_016817    | OAS2    | 2'-5'-oligoadenylate synthetase 2, 69/71kDa                 | ENST00000392583 | -1,446186116 |
| A_33_P3283611 | NM_001549    | IFIT3   | interferon-induced protein with tetratricopeptide repeats 3 | ENST00000543062 | -1,453472581 |
| A_32_P101031  | NM_144586    | LYPD1   | LY6/PLAUR domain containing 1                               | ENST00000397463 | -1,45510369  |
| A_23_P121253  | NM_003810    | TNFSF10 | tumor necrosis factor (ligand) superfamily, member 10       | ENST00000241261 | -1,458967256 |
| A_23_P24004   | NM_001547    | IFIT2   | interferon-induced protein with tetratricopeptide repeats 2 | ENST00000371826 | -1,459550984 |
| A_23_P72096   | NM_000575    | IL1A    | interleukin 1, alpha                                        | ENST00000263339 | -1,465645957 |
| A_23_P121106  | NM_003865    | HESX1   | HESX homeobox 1                                             | ENST00000295934 | -1,474089202 |
| A_23_P72096   | NM_000575    | IL1A    | interleukin 1, alpha                                        | ENST00000263339 | -1,474695197 |
| A_23_P72096   | NM_000575    | IL1A    | interleukin 1, alpha                                        | ENST00000263339 | -1,484078329 |
| A_33_P3364488 | NM_001170631 | FCAMR   | Fc receptor, IgA, IgM, high affinity                        | ENST00000450945 | -1,48529403  |
| A_23_P49759   | NM_002981    | CCL1    | chemokine (C-C motif) ligand 1                              | ENST00000225842 | -1,491867246 |
| A_23_P121253  | NM_003810    | TNFSF10 | tumor necrosis factor (ligand) superfamily, member 10       | ENST00000241261 | -1,493364399 |
| A_23_P121106  | NM_003865    | HESX1   | HESX homeobox 1                                             | ENST00000295934 | -1,50046104  |
| A_23_P121253  | NM_003810    | TNFSF10 | tumor necrosis factor (ligand) superfamily, member 10       | ENST00000241261 | -1,502116328 |
| A_23_P72096   | NM_000575    | IL1A    | interleukin 1, alpha                                        | ENST00000263339 | -1,502760905 |
| A_23_P72096   | NM_000575    | IL1A    | interleukin 1, alpha                                        | ENST00000263339 | -1,504576332 |
| A_23_P121106  | NM_003865    | HESX1   | HESX homeobox 1                                             | ENST00000295934 | -1,508283166 |
| A_23_P121253  | NM_003810    | TNFSF10 | tumor necrosis factor (ligand) superfamily, member 10       | ENST00000241261 | -1,510807613 |
| A_23_P121253  | NM_003810    | TNFSF10 | tumor necrosis factor (ligand) superfamily, member 10       | ENST00000241261 | -1,512688553 |
| A_23_P121106  | NM_003865    | HESX1   | HESX homeobox 1                                             | ENST00000295934 | -1,520428097 |
| A_33_P3226810 | NM_003810    | TNFSF10 | tumor necrosis factor (ligand) superfamily, member 10       | ENST00000241261 | -1,52725335  |
| A_23_P121253  | NM_003810    | TNFSF10 | tumor necrosis factor (ligand) superfamily, member 10       | ENST00000241261 | -1,530526644 |

|                |            |         |                                                                                                            |                 |              |
|----------------|------------|---------|------------------------------------------------------------------------------------------------------------|-----------------|--------------|
| A_23_P72096    | NM_000575  | IL1A    | interleukin 1, alpha                                                                                       | ENST00000263339 | -1,544386944 |
| A_23_P72096    | NM_000575  | IL1A    | interleukin 1, alpha                                                                                       | ENST00000263339 | -1,550199525 |
| A_23_P72096    | NM_000575  | IL1A    | interleukin 1, alpha                                                                                       | ENST00000263339 | -1,55095152  |
| A_23_P121253   | NM_003810  | TNFSF10 | tumor necrosis factor (ligand) superfamily, member 10                                                      | ENST00000241261 | -1,552069285 |
| A_23_P121106   | NM_003865  | HESX1   | HESX homeobox 1                                                                                            | ENST00000295934 | -1,561434807 |
| A_23_P72096    | NM_000575  | IL1A    | interleukin 1, alpha                                                                                       | ENST00000263339 | -1,566934149 |
| A_23_P121106   | NM_003865  | HESX1   | HESX homeobox 1                                                                                            | ENST00000295934 | -1,575407986 |
| A_19_P00812190 | THC2520127 | Q5D1D6  |                                                                                                            |                 | -1,591650835 |
| A_23_P72096    | NM_000575  | IL1A    | interleukin 1, alpha                                                                                       | ENST00000263339 | -1,61017269  |
| A_23_P35092    | NM_153758  | IL19    | interleukin 19                                                                                             | ENST00000270218 | -1,610886181 |
| A_23_P121106   | NM_003865  | HESX1   | HESX homeobox 1                                                                                            | ENST00000295934 | -1,611875697 |
| A_23_P8801     | NM_000777  | CYP3A5  | cytochrome P450, family 3, subfamily A, polypeptide 5                                                      | ENST00000339843 | -1,618466494 |
| A_24_P28722    | NM_080657  | RSAD2   | radical S-adenosyl methionine domain containing 2                                                          | ENST00000382040 | -1,620257617 |
| A_23_P121253   | NM_003810  | TNFSF10 | tumor necrosis factor (ligand) superfamily, member 10                                                      | ENST00000241261 | -1,633668647 |
| A_23_P7560     | NM_002187  | IL12B   | interleukin 12B (natural killer cell stimulatory factor 2, cytotoxic T lymphocyte-inducing protein beta 1) | ENST00000231228 | -1,636643105 |
| A_23_P121253   | NM_003810  | TNFSF10 | tumor necrosis factor (ligand) superfamily, member 10                                                      | ENST00000241261 | -1,653517154 |
| A_23_P45871    | NM_006820  | IFI44L  | interferon-induced protein 44-like                                                                         | ENST00000476521 | -1,69201947  |
| A_33_P3341499  | NM_003392  | WNT5A   | wingless-type MMTV integration site family, member 5A                                                      | ENST00000264634 | -1,848189481 |
| A_23_P207456   | NM_005623  | CCL8    | chemokine (C-C motif) ligand 8                                                                             | ENST00000225840 | -1,865228947 |

Comparison of gene expression profiling between ANK-infected macrophages

| ProbeName     | SystematicName | GeneSymbol     | GeneName                                             | EnsemblID       | ANK vs<br>MØ_logFC |
|---------------|----------------|----------------|------------------------------------------------------|-----------------|--------------------|
| A_23_P87879   | NM_001781      | CD69           | CD69 molecule                                        | ENST00000228434 | 1,401771162        |
| A_23_P80974   | NM_005651      | TDO2           | tryptophan 2,3-dioxygenase                           | ENST00000510293 | 1,290613125        |
| A_23_P10025   | NM_006159      | NELL2          | NEL-like 2 (chicken)                                 | ENST00000437801 | 1,168807579        |
| A_23_P10025   | NM_006159      | NELL2          | NEL-like 2 (chicken)                                 | ENST00000437801 | 1,165732015        |
| A_23_P31725   | NM_001715      | BLK            | B lymphoid tyrosine kinase                           | ENST00000427279 | 1,131552367        |
| A_23_P10025   | NM_006159      | NELL2          | NEL-like 2 (chicken)                                 | ENST00000437801 | 1,069933298        |
| A_23_P159335  | NM_004931      | CD8B           | CD8b molecule                                        | ENST00000390655 | 0,968895894        |
| A_23_P87879   | NM_001781      | CD69           | CD69 molecule                                        | ENST00000228434 | 0,967250263        |
| A_23_P44155   | NM_198196      | CD96           | CD96 molecule                                        | ENST00000283285 | 0,937653114        |
| A_23_P87879   | NM_001781      | CD69           | CD69 molecule                                        | ENST00000228434 | 0,931876901        |
| A_33_P3250680 | NM_000074      | CD40LG         | CD40 ligand                                          | ENST00000370629 | 0,923608007        |
| A_23_P354151  | NM_005546      | ITK            | IL2-inducible T-cell kinase                          | ENST00000519402 | 0,877838834        |
| A_23_P103361  | NM_005356      | LCK            | lymphocyte-specific protein tyrosine kinase          | ENST00000469765 | 0,876449127        |
| A_23_P340019  | NM_178844      | NLRC3          | NLR family, CARD domain containing 3                 | ENST00000419350 | 0,868681773        |
| A_23_P10025   | NM_006159      | NELL2          | NEL-like 2 (chicken)                                 | ENST00000437801 | 0,858485306        |
| A_23_P171074  | NM_004867      | ITM2A          | integral membrane protein 2A                         | ENST00000469541 | 0,852043445        |
| A_23_P87879   | NM_001781      | CD69           | CD69 molecule                                        | ENST00000228434 | 0,844780324        |
| A_23_P103361  | NM_005356      | LCK            | lymphocyte-specific protein tyrosine kinase          | ENST00000469765 | 0,843352947        |
| A_24_P20630   | NM_016269      | LEF1           | lymphoid enhancer-binding factor 1                   | ENST00000503879 | 0,8421521          |
| A_23_P351148  | NM_053282      | SH2D1B         | SH2 domain containing 1B                             | ENST00000359567 | 0,835845827        |
| A_21_P0010761 | BC035370       | XLOC_I2_000941 |                                                      |                 | 0,829182842        |
| A_24_P272761  | NM_020946      | DENND1A        | DENN/MADD domain containing 1A                       | ENST00000373624 | 0,819527823        |
| A_23_P10025   | NM_006159      | NELL2          | NEL-like 2 (chicken)                                 | ENST00000437801 | 0,818385708        |
| A_23_P364324  | NM_152701      | ABCA13         | ATP-binding cassette, sub-family A (ABC1), member 13 | ENST00000435803 | 0,816440221        |
| A_23_P103361  | NM_005356      | LCK            | lymphocyte-specific protein tyrosine kinase          | ENST00000469765 | 0,806825331        |
| A_23_P103361  | NM_005356      | LCK            | lymphocyte-specific protein tyrosine kinase          | ENST00000469765 | 0,802897006        |

|                |                 |                |                                                      |                 |             |
|----------------|-----------------|----------------|------------------------------------------------------|-----------------|-------------|
| A_33_P3323842  | NR_002832       | BDNF-AS1       | BDNF antisense RNA 1 (non-protein coding)            |                 | 0,802155735 |
| A_23_P10025    | NM_006159       | NELL2          | NEL-like 2 (chicken)                                 | ENST00000437801 | 0,796533534 |
| A_23_P10025    | NM_006159       | NELL2          | NEL-like 2 (chicken)                                 | ENST00000437801 | 0,796047873 |
| A_33_P3381796  | XR_108716       | LOC393078      | uncharacterized LOC393078                            |                 | 0,794481008 |
| A_21_P0003240  | TCONS_00006120  | XLOC_002725    |                                                      |                 | 0,794399724 |
| A_21_P0003594  | TCONS_00008035  | XLOC_003498    |                                                      |                 | 0,791712446 |
| A_21_P0006224  | TCONS_00016151  | XLOC_007557    |                                                      |                 | 0,789821492 |
| A_23_P103361   | NM_005356       | LCK            | lymphocyte-specific protein tyrosine kinase          | ENST00000469765 | 0,789465928 |
| A_23_P103361   | NM_005356       | LCK            | lymphocyte-specific protein tyrosine kinase          | ENST00000469765 | 0,789456177 |
| A_23_P108501   | NM_004438       | EPHA4          | EPH receptor A4                                      | ENST00000392071 | 0,788109983 |
| A_23_P1102     | NM_001100       | ACTA1          | actin, alpha 1, skeletal muscle                      | ENST00000366682 | 0,780728146 |
| A_33_P3298120  | NM_001037558    | HEPN1          | hepatocellular carcinoma, down-regulated 1           | ENST00000408930 | 0,77420661  |
| A_23_P103361   | NM_005356       | LCK            | lymphocyte-specific protein tyrosine kinase          | ENST00000469765 | 0,769184164 |
| A_23_P21057    | NM_052838       | Sep-01         | septin 1                                             | ENST00000321367 | 0,766121287 |
| A_23_P103361   | NM_005356       | LCK            | lymphocyte-specific protein tyrosine kinase          | ENST00000469765 | 0,761285724 |
| A_21_P0002602  | TCONS_00004841  | XLOC_001564    |                                                      |                 | 0,759493991 |
| A_33_P3306159  | NM_001080495    | TNRC18         | trinucleotide repeat containing 18                   | ENST00000430969 | 0,759161539 |
| A_23_P103310   | NM_002963       | S100A7         | S100 calcium binding protein A7                      | ENST00000368723 | 0,758122344 |
| A_23_P209954   | NM_006433       | GNLY           | granulysin                                           | ENST00000489980 | 0,753630654 |
| A_23_P6293     | NM_018961       | UBASH3A        | ubiquitin associated and SH3 domain containing A     | ENST00000473381 | 0,749738537 |
| A_33_P3275495  | XR_108366       | LOC400743      | uncharacterized LOC400743                            |                 | 0,748814604 |
| A_33_P3379039  | NM_001178126    | IGLL5          | immunoglobulin lambda-like polypeptide 5             | ENST00000390321 | 0,747516279 |
| A_23_P103361   | NM_005356       | LCK            | lymphocyte-specific protein tyrosine kinase          | ENST00000469765 | 0,741654343 |
| A_23_P109913   | NM_006564       | CXCR6          | chemokine (C-X-C motif) receptor 6                   | ENST00000438735 | 0,741177762 |
| A_21_P0003922  | ENST00000510067 | XLOC_004286    |                                                      | ENST00000510067 | 0,739984216 |
| A_23_P140725   | NM_014714       | IFT140         | intraflagellar transport 140 homolog (Chlamydomonas) | ENST00000426508 | 0,733038122 |
| A_21_P0013122  | BC039678        | XLOC_l2_012378 |                                                      |                 | 0,72661933  |
| A_19_P00320841 | NM_001113434    | C17orf51       | chromosome 17 open reading frame 51                  | ENST00000391411 | 0,726197803 |
| A_23_P363778   | NM_001463       | FRZB           | frizzled-related protein                             | ENST00000295113 | 0,723970621 |

|                |                 |              |                                                                   |                 |             |
|----------------|-----------------|--------------|-------------------------------------------------------------------|-----------------|-------------|
| A_33_P3504002  | NR_033893       | LOC286186    | uncharacterized LOC286186                                         | ENST00000520902 | 0,722167173 |
| A_33_P3406567  | NM_152866       | MS4A1        | membrane-spanning 4-domains, subfamily A, member 1                | ENST00000389939 | 0,722114976 |
| A_23_P88909    | NM_004209       | SYNGR3       | synaptogyrin 3                                                    | ENST00000320633 | 0,721008368 |
| A_33_P3535649  | NM_032296       | FLYWCH1      | FLYWCH-type zinc finger 1                                         | ENST00000399667 | 0,718973743 |
| A_23_P109913   | NM_006564       | CXCR6        | chemokine (C-X-C motif) receptor 6                                | ENST00000438735 | 0,718148238 |
| A_32_P214665   | NM_001102566    | PCP4L1       | Purkinje cell protein 4 like 1                                    | ENST00000504449 | 0,717202681 |
| A_21_P0010162  | ENST00000457157 | XLOC_013929  |                                                                   | ENST00000457157 | 0,716252448 |
| A_21_P0014466  | XR_109952       | LOC100507307 | uncharacterized LOC100507307                                      |                 | 0,714636228 |
| A_23_P87879    | NM_001781       | CD69         | CD69 molecule                                                     | ENST00000228434 | 0,714003555 |
| A_23_P167882   | NM_052872       | IL17F        | interleukin 17F                                                   | ENST00000478427 | 0,713141265 |
| A_24_P97374    | NM_005442       | EOMES        | eomesodermin                                                      | ENST00000535713 | 0,711822833 |
| A_33_P3234546  | NM_004931       | CD8B         | CD8b molecule                                                     | ENST00000390655 | 0,710169539 |
| A_33_P3351745  | NM_024070       | PVRIG        | poliovirus receptor related immunoglobulin domain contain         | ENST00000451963 | 0,709700696 |
| A_23_P20697    | NM_014694       | ADAMTSL2     | ADAMTS-like 2                                                     | ENST00000393060 | 0,708909795 |
| A_24_P11315    | NM_020190       | OLFML3       | olfactomedin-like 3                                               | ENST00000393300 | 0,708402604 |
| A_21_P0004418  | TCONS_00010392  | XLOC_004908  |                                                                   |                 | 0,707975225 |
| A_33_P3217649  | NM_001048265    | C9orf116     | chromosome 9 open reading frame 116                               | ENST00000371786 | 0,707935474 |
| A_33_P3313528  | XM_003403468    | LOC100652851 | uncharacterized LOC100652851                                      |                 | 0,705915377 |
| A_21_P0014919  | NR_024560       | LOC100130148 | uncharacterized LOC100130148                                      |                 | 0,705411984 |
| A_33_P3232965  | NM_001010870    | TDRD6        | tudor domain containing 6                                         | ENST00000316081 | 0,703444603 |
| A_23_P13294    | NM_001004459    | OR1S2        | olfactory receptor, family 1, subfamily S, member 2               | ENST00000302592 | 0,702736969 |
| A_21_P0002199  | ENST00000433893 | XLOC_001428  |                                                                   | ENST00000433893 | 0,70243783  |
| A_21_P0005209  | ENST00000436915 | XLOC_005979  |                                                                   | ENST00000436915 | 0,698763497 |
| A_33_P3210418  | NM_152351       | SLC5A10      | solute carrier family 5 (sodium/glucose cotransporter), member 10 | ENST00000395643 | 0,697751292 |
| A_19_P00322936 | AK055081        | XLOC_010376  |                                                                   |                 | 0,695888419 |
| A_23_P102017   | NM_020711       | ERMN         | ermin, ERM-like protein                                           | ENST00000397283 | 0,695292161 |
| A_24_P83586    | NM_015506       | MMACHC       | methylmalonic aciduria (cobalamin deficiency) cblC type, w        | ENST00000401061 | 0,695288617 |
| A_24_P45476    | NM_002995       | XCL1         | chemokine (C motif) ligand 1                                      | ENST00000367818 | 0,694094848 |
| A_33_P3333900  | AK096041        | LOC100129572 | uncharacterized LOC100129572                                      |                 | 0,69336444  |



|                |                 |                |                                                        |                 |             |
|----------------|-----------------|----------------|--------------------------------------------------------|-----------------|-------------|
| A_23_P10025    | NM_006159       | NELL2          | NEL-like 2 (chicken)                                   | ENST00000437801 | 0,693307737 |
| A_23_P109913   | NM_006564       | CXCR6          | chemokine (C-X-C motif) receptor 6                     | ENST00000438735 | 0,691129867 |
| A_21_P0006570  | TCONS_00017455  | XLOC_008050    |                                                        |                 | 0,690283217 |
| A_21_P0013836  | BX111592        | XLOC_I2_015849 |                                                        |                 | 0,686877526 |
| A_33_P3354001  | NM_001167940    | CADPS2         | Ca <sup>++</sup> -dependent secretion activator 2      | ENST00000420900 | 0,685996853 |
| A_24_P41801    | NM_005577       | LPA            | lipoprotein, Lp(a)                                     | ENST00000447678 | 0,68460047  |
| A_33_P3290089  | XR_109536       | LOC100505585   | uncharacterized LOC100505585                           |                 | 0,684596259 |
| A_23_P108501   | NM_004438       | EPHA4          | EPH receptor A4                                        | ENST00000392071 | 0,684353875 |
| A_23_P103877   | NM_001010847    | LRRC38         | leucine rich repeat containing 38                      | ENST00000376085 | 0,683050602 |
| A_33_P3298990  | NM_014207       | CD5            | CD5 molecule                                           | ENST00000347785 | 0,681824052 |
| A_32_P158966   | NM_016523       | KLRF1          | killer cell lectin-like receptor subfamily F, member 1 | ENST00000535631 | 0,68032089  |
| A_33_P3391496  | ENST00000404867 | SLIT3          | slit homolog 3 (Drosophila)                            | ENST00000404867 | 0,680145115 |
| A_23_P122144   | NM_152404       | UGT3A1         | UDP glycosyltransferase 3 family, polypeptide A1       | ENST00000515801 | 0,67986557  |
| A_23_P103310   | NM_002963       | S100A7         | S100 calcium binding protein A7                        | ENST00000368723 | 0,678576312 |
| A_33_P3660204  | NR_037895       | LOC340073      | uncharacterized LOC340073                              | ENST00000505663 | 0,678284813 |
| A_23_P87879    | NM_001781       | CD69           | CD69 molecule                                          | ENST00000228434 | 0,675726878 |
| A_19_P00317974 | ENST00000456795 | XLOC_005342    |                                                        | ENST00000456795 | 0,674686921 |
| A_23_P151046   | NM_002259       | KLRC1          | killer cell lectin-like receptor subfamily C, member 1 | ENST00000544822 | 0,674511692 |
| A_23_P94338    | NM_006209       | ENPP2          | ectonucleotide pyrophosphatase/phosphodiesterase 2     | ENST00000522826 | 0,674101731 |
| A_33_P3226177  | NM_001037332    | CYFIP2         | cytoplasmic FMR1 interacting protein 2                 | ENST00000442283 | 0,673775548 |
| A_23_P434289   | NM_080865       | GPR62          | G protein-coupled receptor 62                          | ENST00000322241 | 0,673294064 |
| A_23_P109913   | NM_006564       | CXCR6          | chemokine (C-X-C motif) receptor 6                     | ENST00000438735 | 0,670624858 |
| A_21_P0011884  | ENST00000430980 | LOC728763      | rootletin-like                                         | ENST00000430980 | 0,668954132 |
| A_32_P46238    | NR_001443       | LOC339240      | keratin 17 pseudogene                                  | ENST00000445433 | 0,66772454  |
| A_33_P3391796  | NM_005450       | NOG            | noggin                                                 | ENST00000332822 | 0,667243912 |
| A_33_P3407256  | NM_001166260    | TRIP13         | thyroid hormone receptor interactor 13                 | ENST00000512024 | 0,666632741 |
| A_21_P0010759  | ENST00000458145 | XLOC_I2_000920 |                                                        | ENST00000458145 | 0,666369796 |
| A_23_P118254   | NM_001451       | FOXF1          | forkhead box F1                                        | ENST00000262426 | 0,664549106 |
| A_33_P3386562  | NM_032785       | AGBL4          | ATP/GTP binding protein-like 4                         | ENST00000371838 | 0,663100535 |

|               |                 |             |                                                              |                 |             |
|---------------|-----------------|-------------|--------------------------------------------------------------|-----------------|-------------|
| A_23_P213857  | NM_000587       | C7          | complement component 7                                       | ENST00000313164 | 0,662116741 |
| A_33_P3413821 | AK090554        | KIRREL      | kin of IRRE like (Drosophila)                                | ENST00000368172 | 0,662079943 |
| A_23_P128855  | NM_014579       | SLC39A2     | solute carrier family 39 (zinc transporter), member 2        | ENST00000298681 | 0,661274337 |
| A_24_P932416  | NM_001123228    | TMEM14E     | transmembrane protein 14E                                    | ENST00000408960 | 0,661233647 |
| A_24_P261760  | NM_005810       | KLRG1       | killer cell lectin-like receptor subfamily G, member 1       | ENST00000356986 | 0,660838723 |
| A_23_P113471  | NM_174912       | FAAH2       | fatty acid amide hydrolase 2                                 | ENST00000491179 | 0,659743066 |
| A_21_P0002667 | TCONS_00005192  | XLOC_002192 |                                                              |                 | 0,658490527 |
| A_23_P108501  | NM_004438       | EPHA4       | EPH receptor A4                                              | ENST00000392071 | 0,658455326 |
| A_21_P0014208 | ENST00000518238 | MATN2       | matrilin 2                                                   | ENST00000518238 | 0,657393825 |
| A_33_P3282374 | ENST00000535064 | TIAM2       | T-cell lymphoma invasion and metastasis 2                    | ENST00000535064 | 0,655933632 |
| A_33_P3503408 | BC044606        | LOC221946   | uncharacterized LOC221946                                    |                 | 0,654368446 |
| A_33_P3235213 | NM_173799       | TIGIT       | T cell immunoreceptor with Ig and ITIM domains               | ENST00000485814 | 0,651978583 |
| A_24_P211565  | NM_031910       | C1QTNF6     | C1q and tumor necrosis factor related protein 6              | ENST00000493023 | 0,647715884 |
| A_23_P1331    | NM_080801       | COL13A1     | collagen, type XIII, alpha 1                                 | ENST00000478219 | 0,647563573 |
| A_23_P311875  | NM_006725       | CD6         | CD6 molecule                                                 | ENST00000344931 | 0,646768874 |
| A_24_P323148  | NM_182573       | LYPD5       | LY6/PLAUR domain containing 5                                | ENST00000377950 | 0,644685171 |
| A_23_P161076  | NM_001767       | CD2         | CD2 molecule                                                 | ENST00000369478 | 0,644291744 |
| A_21_P0008380 | ENST00000555032 | XLOC_010918 |                                                              | ENST00000555032 | 0,643931712 |
| A_23_P105691  | NM_018654       | GPRC5D      | G protein-coupled receptor, family C, group 5, member D      | ENST00000396333 | 0,643681332 |
| A_21_P0006882 | TCONS_00018246  | XLOC_008522 |                                                              |                 | 0,643173439 |
| A_23_P153372  | NM_032855       | HSH2D       | hematopoietic SH2 domain containing                          | ENST00000253680 | 0,641433091 |
| A_23_P88691   | NM_000745       | CHRNA5      | cholinergic receptor, nicotinic, alpha 5                     | ENST00000299565 | 0,641115011 |
| A_23_P130815  | NM_012312       | KIR2DS2     | killer cell immunoglobulin-like receptor, two domains, short | ENST00000339924 | 0,640654503 |
| A_33_P3312743 | NM_033187       | KRTAP4-3    | keratin associated protein 4-3                               | ENST00000391356 | 0,640650582 |
| A_33_P3319860 | NR_036467       | IFFO1       | intermediate filament family orphan 1                        | ENST00000487279 | 0,640318327 |
| A_23_P117851  | NM_001030005    | CPLX3       | complexin 3                                                  | ENST00000488000 | 0,639670285 |
| A_23_P208334  | NM_006202       | PDE4A       | phosphodiesterase 4A, cAMP-specific                          | ENST00000419866 | 0,639098232 |
| A_32_P84369   | NM_001079529    | FAM153B     | family with sequence similarity 153, member B                | ENST00000502475 | 0,638740112 |
| A_24_P279489  | NM_001128159    | VPS53       | vacuolar protein sorting 53 homolog (S. cerevisiae)          | ENST00000437048 | 0,638655596 |

|               |                 |              |                                                              |                 |             |
|---------------|-----------------|--------------|--------------------------------------------------------------|-----------------|-------------|
| A_33_P3299560 | AK094480        | LEKR1        | leucine, glutamate and lysine rich 1                         |                 | 0,638609678 |
| A_21_P0001393 | TCONS_00001212  | XLOC_000478  |                                                              |                 | 0,637571799 |
| A_21_P0014659 | XR_110932       | LOC100506678 | uncharacterized LOC100506678                                 |                 | 0,637557622 |
| A_21_P0014228 | ENST00000433357 | LOC100289137 |                                                              | ENST00000433357 | 0,635193029 |
| A_24_P331373  | NM_031444       | C22orf13     | chromosome 22 open reading frame 13                          | ENST00000493099 | 0,633212844 |
| A_23_P103361  | NM_005356       | LCK          | lymphocyte-specific protein tyrosine kinase                  | ENST00000469765 | 0,63290629  |
| A_23_P385067  | NM_053277       | CLIC6        | chloride intracellular channel 6                             | ENST00000360731 | 0,632123185 |
| A_24_P313180  | ENST00000256319 | C14orf1      | chromosome 14 open reading frame 1                           | ENST00000256319 | 0,631660135 |
| A_33_P3251552 | NM_001029871    | RSPO4        | R-spondin 4                                                  | ENST00000217260 | 0,631477494 |
| A_23_P108501  | NM_004438       | EPHA4        | EPH receptor A4                                              | ENST00000392071 | 0,631472823 |
| A_23_P100912  | NM_014030       | GIT1         | G protein-coupled receptor kinase interacting ArfGAP 1       | ENST00000394869 | 0,631022429 |
| A_24_P247026  | NM_001008226    | FAM154B      | family with sequence similarity 154, member B                | ENST00000339465 | 0,630887816 |
| A_23_P383031  | NM_032449       | CC2D1B       | coiled-coil and C2 domain containing 1B                      | ENST00000371586 | 0,627684112 |
| A_23_P108404  | NM_001037131    | AGAP1        | ArfGAP with GTPase domain, ankyrin repeat and PH domain      | ENST00000304032 | 0,626172118 |
| A_33_P3412349 | NM_152943       | ZNF268       | zinc finger protein 268                                      | ENST00000228289 | 0,625977393 |
| A_24_P119685  | NM_052843       | OBSCN        | obscurin, cytoskeletal calmodulin and titin-interacting RhoG | ENST00000284548 | 0,625210717 |
| A_21_P0014024 | ENST00000438418 | LOC100652784 |                                                              | ENST00000438418 | 0,625205248 |
| A_23_P11841   | NM_001684       | ATP2B4       | ATPase, Ca <sup>++</sup> transporting, plasma membrane 4     | ENST00000341360 | 0,624186432 |
| A_24_P419132  | NM_006733       | CENPI        | centromere protein I                                         | ENST00000372926 | 0,624176082 |
| A_23_P122976  | NM_002069       | GNAI1        | guanine nucleotide binding protein (G protein), alpha inhibi | ENST00000351004 | 0,623090212 |
| A_23_P34676   | NM_198053       | CD247        | CD247 molecule                                               | ENST00000483825 | 0,61990784  |
| A_23_P50517   | NM_001101419    | ZNF541       | zinc finger protein 541                                      | ENST00000314121 | 0,619788913 |
| A_33_P3306442 | NM_032134       | QRICH2       | glutamine rich 2                                             | ENST00000524722 | 0,619739966 |
| A_23_P109913  | NM_006564       | CXCR6        | chemokine (C-X-C motif) receptor 6                           | ENST00000438735 | 0,619691998 |
| A_21_P0005139 | TCONS_00012614  | XLOC_005492  |                                                              |                 | 0,619595201 |
| A_23_P7582    | NM_003202       | TCF7         | transcription factor 7 (T-cell specific, HMG-box)            | ENST00000522653 | 0,618429709 |
| A_23_P122144  | NM_152404       | UGT3A1       | UDP glycosyltransferase 3 family, polypeptide A1             | ENST00000515801 | 0,618321256 |
| A_33_P3373446 | ENST00000453638 | LOC100507505 | uncharacterized LOC100507505                                 | ENST00000453638 | 0,61827457  |
| A_23_P113793  | NM_024508       | ZBED2        | zinc finger, BED-type containing 2                           | ENST00000317012 | 0,618260468 |

|                |                  |                |                                                        |                 |             |
|----------------|------------------|----------------|--------------------------------------------------------|-----------------|-------------|
| A_33_P3312730  | NM_177455        | BHLHA15        | basic helix-loop-helix family, member a15              | ENST00000314018 | 0,61750875  |
| A_21_P0012119  | TCONS_I2_0001624 | XLOC_I2_008622 |                                                        |                 | 0,617504934 |
| A_23_P391637   | NM_020705        | TBC1D24        | TBC1 domain family, member 24                          | ENST00000293970 | 0,617456932 |
| A_23_P34700    | NM_000364        | TNNT2          | troponin T type 2 (cardiac)                            | ENST00000479297 | 0,617040033 |
| A_21_P0008601  | ENST00000557558  | XLOC_011188    |                                                        | ENST00000557558 | 0,615281053 |
| A_32_P194062   | NM_000372        | TYR            | tyrosinase (oculocutaneous albinism IA)                | ENST00000263321 | 0,615247969 |
| A_33_P3265855  | NM_181334        | PRR5-ARHGAP8   | PRR5-ARHGAP8 readthrough                               | ENST00000389773 | 0,614783992 |
| A_23_P43369    | NM_014450        | SIT1           | signaling threshold regulating transmembrane adaptor 1 | ENST00000474403 | 0,613932083 |
| A_21_P0001817  | ENST00000417930  | XLOC_001331    |                                                        | ENST00000417930 | 0,613588153 |
| A_21_P0001426  | TCONS_00001294   | XLOC_000578    |                                                        |                 | 0,611439719 |
| A_23_P422350   | NM_000260        | MYO7A          | myosin VIIA                                            | ENST00000343419 | 0,610491837 |
| A_21_P0008559  | BC104435         | LOC145837      | uncharacterized LOC145837                              |                 | 0,609927661 |
| A_21_P0002549  | TCONS_00004611   | XLOC_002515    |                                                        |                 | 0,609302718 |
| A_23_P109913   | NM_006564        | CXCR6          | chemokine (C-X-C motif) receptor 6                     | ENST00000438735 | 0,609109649 |
| A_19_P00318097 | ENST00000485404  | XLOC_I2_009762 |                                                        | ENST00000485404 | 0,608203056 |
| A_33_P3405916  | NR_038368        | LINC00273      | long intergenic non-protein coding RNA 273             | ENST00000539813 | 0,608202442 |
| A_21_P0003275  | THC2523097       | XLOC_002996    |                                                        |                 | 0,607146796 |
| A_21_P0008787  | TCONS_00023798   | XLOC_011591    |                                                        |                 | 0,60697878  |
| A_23_P256694   | NR_002776        | MCM3AP-AS1     | MCM3AP antisense RNA 1 (non-protein coding)            |                 | 0,606567104 |
| A_33_P3311621  | NR_034027        | LOC338739      | uncharacterized LOC338739                              |                 | 0,606469068 |
| A_21_P0010309  | TCONS_00029212   | XLOC_013923    |                                                        |                 | 0,606077577 |
| A_33_P3344292  | ENST00000554335  | SAMD4A         | sterile alpha motif domain containing 4A               | ENST00000554335 | 0,605472363 |
| A_33_P3229472  | NM_001012710     | KRTAP5-10      | keratin associated protein 5-10                        | ENST00000398531 | 0,604328176 |
| A_33_P3209396  | ENST00000498589  | PPIL2          | peptidylprolyl isomerase (cyclophilin)-like 2          | ENST00000498589 | 0,602576569 |
| A_21_P0008700  | BC117365         | LOC145757      | uncharacterized LOC145757                              |                 | 0,601814739 |
| A_21_P0002222  | TCONS_00003696   | XLOC_001485    |                                                        |                 | 0,600808398 |
| A_33_P3297345  | NM_001105669     | TTC24          | tetratricopeptide repeat domain 24                     | ENST00000368236 | 0,600000621 |
| A_23_P15692    | NM_017986        | GPR172B        | G protein-coupled receptor 172B                        | ENST00000424747 | 0,59936397  |
| A_23_P7582     | NM_003202        | TCF7           | transcription factor 7 (T-cell specific, HMG-box)      | ENST00000522653 | 0,598963589 |

|               |                 |                |                                                                 |                 |             |
|---------------|-----------------|----------------|-----------------------------------------------------------------|-----------------|-------------|
| A_21_P0000567 | NR_028443       | SLC25A5-AS1    | SLC25A5 antisense RNA 1 (non-protein coding)                    |                 | 0,598645193 |
| A_23_P24966   | NM_171997       | USP2           | ubiquitin specific peptidase 2                                  | ENST00000525735 | 0,598286799 |
| A_21_P0006302 | TCONS_00016439  | XLOC_007807    |                                                                 |                 | 0,598167659 |
| A_21_P0011346 | BG107090        | XLOC_I2_004840 |                                                                 |                 | 0,59750178  |
| A_23_P116512  | NM_024841       | PRR5L          | proline rich 5 like                                             | ENST00000389693 | 0,59695639  |
| A_23_P21495   | NM_003890       | FCGBP          | Fc fragment of IgG binding protein                              | ENST00000221347 | 0,596450241 |
| A_21_P0009709 | THC2662154      | XLOC_013040    |                                                                 |                 | 0,596254634 |
| A_23_P109913  | NM_006564       | CXCR6          | chemokine (C-X-C motif) receptor 6                              | ENST00000438735 | 0,595469718 |
| A_21_P0003303 | XR_108514       | LOC100505547   | uncharacterized LOC100505547                                    | ENST00000434969 | 0,595208797 |
| A_33_P3271965 | NM_000838       | GRM1           | glutamate receptor, metabotropic 1                              | ENST00000507907 | 0,594153434 |
| A_23_P252758  | NM_000420       | KEL            | Kell blood group, metallo-endopeptidase                         | ENST00000470850 | 0,593547055 |
| A_23_P53193   | NM_206927       | SYTL2          | synaptotagmin-like 2                                            | ENST00000525692 | 0,592262572 |
| A_23_P98571   | NM_145017       | PPP1R32        | protein phosphatase 1, regulatory subunit 32                    | ENST00000432063 | 0,592011655 |
| A_21_P0006502 | CN284311        | XLOC_008000    |                                                                 |                 | 0,591793368 |
| A_23_P342398  | NR_034140       | C12orf33       | chromosome 12 open reading frame 33                             |                 | 0,591639228 |
| A_23_P103034  | NM_001886       | CRYBA4         | crystallin, beta A4                                             | ENST00000466315 | 0,59159637  |
| A_21_P0009401 | TCONS_00026020  | XLOC_012360    |                                                                 |                 | 0,591515382 |
| A_33_P3247473 | NM_181624       | KRTAP23-1      | keratin associated protein 23-1                                 | ENST00000334160 | 0,591158373 |
| A_33_P3384133 | NM_001163075    | C17orf99       | chromosome 17 open reading frame 99                             | ENST00000340363 | 0,591157121 |
| A_23_P122906  | NM_015570       | AUTS2          | autism susceptibility candidate 2                               | ENST00000406775 | 0,590690269 |
| A_21_P0004761 | ENST00000430931 | XLOC_005771    |                                                                 | ENST00000430931 | 0,590450083 |
| A_21_P0009697 | TCONS_00026966  | XLOC_013018    |                                                                 |                 | 0,590254734 |
| A_23_P111395  | NM_003058       | SLC22A2        | solute carrier family 22 (organic cation transporter), member 2 | ENST00000498556 | 0,590120005 |
| A_21_P0007302 | AK308670        | XLOC_009341    |                                                                 |                 | 0,589657691 |
| A_23_P7582    | NM_003202       | TCF7           | transcription factor 7 (T-cell specific, HMG-box)               | ENST00000522653 | 0,589589813 |
| A_24_P103264  | NM_003360       | UGT8           | UDP glycosyltransferase 8                                       | ENST00000394511 | 0,589537702 |
| A_33_P3318971 | ENST00000357721 | METTL20        | methyltransferase like 20                                       | ENST00000357721 | 0,589371059 |
| A_21_P0005409 | TCONS_00013554  | XLOC_006188    |                                                                 |                 | 0,58908418  |
| A_23_P111919  | NM_013357       | PURG           | purine-rich element binding protein G                           | ENST00000475541 | 0,588699979 |



|                |                  |                |                                                                 |                 |             |
|----------------|------------------|----------------|-----------------------------------------------------------------|-----------------|-------------|
| A_23_P113393   | NM_017413        | APLN           | apelin                                                          | ENST00000307484 | 0,588524946 |
| A_33_P3418790  | ENST00000380347  | GNRH2          | gonadotropin-releasing hormone 2                                | ENST00000380347 | 0,588103122 |
| A_24_P301454   | NR_003108        | NBR2           | neighbor of BRCA1 gene 2 (non-protein coding)                   | ENST00000464237 | 0,588049217 |
| A_23_P143173   | NM_032214        | SLA2           | Src-like-adaptor 2                                              | ENST00000360672 | 0,587439355 |
| A_33_P3305810  | NM_020702        | KIAA1161       | KIAA1161                                                        | ENST00000379142 | 0,587272209 |
| A_23_P130787   | NM_017659        | QPCTL          | glutaminy-peptide cyclotransferase-like                         | ENST00000012049 | 0,587173089 |
| A_23_P369815   | NM_000639        | FASLG          | Fas ligand (TNF superfamily, member 6)                          | ENST00000367721 | 0,586119099 |
| A_19_P00801945 | NR_015364        | LOC441204      | uncharacterized LOC441204                                       |                 | 0,585907768 |
| A_23_P114299   | NM_001504        | CXCR3          | chemokine (C-X-C motif) receptor 3                              | ENST00000373691 | 0,585218245 |
| A_19_P00322088 | XM_001716361     | LOC388210      | apolipoporphins-like                                            |                 | 0,584965774 |
| A_24_P60441    | NM_153717        | EVC            | Ellis van Creveld syndrome                                      | ENST00000264956 | 0,584787269 |
| A_33_P3270793  | NM_145175        | FAM84A         | family with sequence similarity 84, member A                    | ENST00000359969 | 0,584735482 |
| A_21_P0005213  | ENST00000411542  | XLOC_005988    |                                                                 | ENST00000411542 | 0,584655149 |
| A_23_P168165   | NR_026780        | C6orf208       | chromosome 6 open reading frame 208                             |                 | 0,58355826  |
| A_21_P0008383  | TCONS_00022622   | XLOC_010922    |                                                                 |                 | 0,58283658  |
| A_33_P3381948  | NM_001080436     | WTIP           | Wilms tumor 1 interacting protein                               | ENST00000270288 | 0,582294234 |
| A_21_P0011732  | AK022793         | XLOC_I2_006983 |                                                                 |                 | 0,582199558 |
| A_23_P2543     | NM_015267        | CUX2           | cut-like homeobox 2                                             | ENST00000261726 | 0,581588098 |
| A_19_P00322743 | XR_110481        | LOC100506029   | uncharacterized LOC100506029                                    |                 | 0,581521949 |
| A_33_P3237891  | ENST00000409922  | CHN2           | chimerin (chimaerin) 2                                          | ENST00000409922 | 0,580915509 |
| A_24_P8109     | NM_001012302     | ANO9           | anoctamin 9                                                     | ENST00000524802 | 0,580684838 |
| A_21_P0014602  | ENST00000440689  | LOC100506293   |                                                                 | ENST00000440689 | 0,580225987 |
| A_33_P3216570  | AJ298317         | MUC5AC         | mucin 5AC, oligomeric mucus/gel-forming                         |                 | 0,580178837 |
| A_33_P3230188  | AF172850         | LINC00328      | long intergenic non-protein coding RNA 328                      |                 | 0,58008077  |
| A_23_P113471   | NM_174912        | FAAH2          | fatty acid amide hydrolase 2                                    | ENST00000491179 | 0,579828664 |
| A_21_P0012938  | ENST00000512035  | XLOC_I2_011426 |                                                                 | ENST00000512035 | 0,579803524 |
| A_21_P0011560  | TCONS_I2_0001100 | XLOC_I2_005921 |                                                                 |                 | 0,579786638 |
| A_24_P13285    | NM_006741        | PPP1R1A        | protein phosphatase 1, regulatory (inhibitor) subunit 1A        | ENST00000257905 | 0,579752447 |
| A_23_P146830   | NM_012140        | SLC25A10       | solute carrier family 25 (mitochondrial carrier; dicarboxylate) | ENST00000331531 | 0,579333077 |

|               |                  |                |                                                                      |                 |             |
|---------------|------------------|----------------|----------------------------------------------------------------------|-----------------|-------------|
| A_33_P3306267 | NM_000280        | PAX6           | paired box 6                                                         | ENST00000379109 | 0,579326436 |
| A_23_P369815  | NM_000639        | FASLG          | Fas ligand (TNF superfamily, member 6)                               | ENST00000367721 | 0,57931019  |
| A_21_P0009712 | BC034565         | XLOC_013043    |                                                                      |                 | 0,579264933 |
| A_24_P105933  | NM_004624        | VIPR1          | vasoactive intestinal peptide receptor 1                             | ENST00000498102 | 0,578391703 |
| A_24_P350759  | NM_004171        | SLC1A2         | solute carrier family 1 (glial high affinity glutamate transpor      | ENST00000278379 | 0,578283853 |
| A_23_P143952  | NM_024548        | CEP97          | centrosomal protein 97kDa                                            | ENST00000327230 | 0,577893576 |
| A_24_P286935  | NM_004311        | ARL3           | ADP-ribosylation factor-like 3                                       |                 | 0,577851896 |
| A_21_P0006513 | TCONS_00017237   | XLOC_008058    |                                                                      |                 | 0,577828142 |
| A_24_P916718  | NM_207336        | ZNF467         | zinc finger protein 467                                              | ENST00000302017 | 0,577371222 |
| A_23_P34007   | NR_002191        | PPP1R2P9       | protein phosphatase 1, regulatory (inhibitor) subunit 2 pseudogene 9 |                 | 0,577063714 |
| A_33_P3340869 | NR_027620        | LOC643719      | uncharacterized LOC643719                                            |                 | 0,576371936 |
| A_21_P0008575 | AK056534         | LOC145757      | uncharacterized LOC145757                                            |                 | 0,575980166 |
| A_23_P102017  | NM_020711        | ERMN           | ermin, ERM-like protein                                              | ENST00000397283 | 0,575849834 |
| A_21_P0011903 | ENST00000454224  | XLOC_I2_007884 |                                                                      | ENST00000454224 | 0,575427194 |
| A_23_P131024  | NM_014383        | ZBTB32         | zinc finger and BTB domain containing 32                             | ENST00000262630 | 0,574990813 |
| A_23_P57784   | NM_021101        | CLDN1          | claudin 1                                                            | ENST00000295522 | 0,574957872 |
| A_23_P323243  | NM_173516        | PNLDC1         | poly(A)-specific ribonuclease (PARN)-like domain containing          | ENST00000275275 | 0,57455155  |
| A_23_P107454  | NM_031958        | KRTAP3-1       | keratin associated protein 3-1                                       | ENST00000391588 | 0,574134658 |
| A_23_P406782  | NM_182983        | HPN            | hepsin                                                               | ENST00000541345 | 0,574081209 |
| A_23_P17354   | NM_024034        | GDAP1L1        | ganglioside-induced differentiation-associated protein 1-like        | ENST00000438466 | 0,573589139 |
| A_21_P0005604 | TCONS_00014314   | XLOC_006471    |                                                                      |                 | 0,573480464 |
| A_33_P3375541 | NM_000732        | CD3D           | CD3d molecule, delta (CD3-TCR complex)                               | ENST00000300692 | 0,573011378 |
| A_23_P108734  | NM_018436        | ALLC           | allantoicase                                                         | ENST00000471711 | 0,572395816 |
| A_33_P3238182 | NR_026772        | C8orf71        | chromosome 8 open reading frame 71                                   | ENST00000521663 | 0,572160542 |
| A_33_P3234124 | ENST00000481917  | FAM132B        | family with sequence similarity 132, member B                        | ENST00000481917 | 0,571307792 |
| A_33_P3533001 | AL568675         | UBE2E4P        | ubiquitin-conjugating enzyme E2E 4 pseudogene                        |                 | 0,57098077  |
| A_33_P3252954 | ENST00000382730  | NKD2           | naked cuticle homolog 2 (Drosophila)                                 | ENST00000382730 | 0,570742132 |
| A_21_P0013750 | TCONS_I2_0003012 | XLOC_I2_015441 |                                                                      |                 | 0,570727541 |
| A_24_P230282  | NM_016378        | VCX2           | variable charge, X-linked 2                                          | ENST00000543690 | 0,570546517 |

|               |                 |              |                                                             |                 |             |
|---------------|-----------------|--------------|-------------------------------------------------------------|-----------------|-------------|
| A_32_P133072  | NM_006108       | SPON1        | spondin 1, extracellular matrix protein                     | ENST00000533633 | 0,570144388 |
| A_23_P123424  | NM_000749       | CHRNB3       | cholinergic receptor, nicotinic, beta 3                     | ENST00000289957 | 0,570102146 |
| A_23_P100539  | NM_001171       | ABCC6        | ATP-binding cassette, sub-family C (CFTR/MRP), member 6     | ENST00000205558 | 0,570070226 |
| A_23_P123071  | NM_001233       | CAV2         | caveolin 2                                                  | ENST00000498493 | 0,569868125 |
| A_33_P3242778 | AK127110        | LOC100129888 | uncharacterized LOC100129888                                |                 | 0,569539761 |
| A_23_P1102    | NM_001100       | ACTA1        | actin, alpha 1, skeletal muscle                             | ENST00000366682 | 0,569490777 |
| A_33_P3298850 | NM_013356       | SLC16A8      | solute carrier family 16, member 8 (monocarboxylic acid tra | ENST00000320521 | 0,568738227 |
| A_21_P0002265 | TCONS_00004866  | XLOC_001608  |                                                             |                 | 0,568469639 |
| A_23_P206280  | NM_201525       | GPR56        | G protein-coupled receptor 56                               | ENST00000379694 | 0,566595611 |
| A_23_P7582    | NM_003202       | TCF7         | transcription factor 7 (T-cell specific, HMG-box)           | ENST00000522653 | 0,566338522 |
| A_23_P108501  | NM_004438       | EPHA4        | EPH receptor A4                                             | ENST00000392071 | 0,566110251 |
| A_21_P0006885 | AL353951        | XLOC_008528  |                                                             |                 | 0,565343191 |
| A_21_P0006726 | ENST00000418372 | XLOC_008700  |                                                             | ENST00000418372 | 0,565142364 |
| A_21_P0005021 | NR_038989       | LOC100507584 | uncharacterized LOC100507584                                | ENST00000506222 | 0,564453535 |
| A_33_P3214948 | NM_014767       | SPOCK2       | sparc/osteonectin, cwcv and kazal-like domains proteoglyca  | ENST00000373109 | 0,564273135 |
| A_23_P24211   | NM_147191       | MMP21        | matrix metallopeptidase 21                                  | ENST00000368808 | 0,563365593 |
| A_23_P374294  | NM_145023       | CCDC7        | coiled-coil domain containing 7                             | ENST00000476558 | 0,563056231 |
| A_33_P3328726 | NM_182791       | CCDC33       | coiled-coil domain containing 33                            | ENST00000398814 | 0,561898999 |
| A_24_P147398  | NM_018289       | VPS53        | vacuolar protein sorting 53 homolog (S. cerevisiae)         | ENST00000401468 | 0,560869012 |
| A_21_P0005775 | ENST00000523604 | XLOC_006946  |                                                             | ENST00000523604 | 0,560283539 |
| A_21_P0000327 | NR_002972       | SNORA39      | small nucleolar RNA, H/ACA box 39                           |                 | 0,560075621 |
| A_33_P3314176 | NM_017709       | FAM46C       | family with sequence similarity 46, member C                | ENST00000369448 | 0,559861772 |
| A_23_P365412  | NM_181644       | MFSD4        | major facilitator superfamily domain containing 4           | ENST00000367147 | 0,559728915 |
| A_33_P3250671 | NM_003202       | TCF7         | transcription factor 7 (T-cell specific, HMG-box)           | ENST00000522561 | 0,559528486 |
| A_21_P0010486 | THC2478115      | XLOC_014484  |                                                             |                 | 0,558992522 |
| A_21_P0006506 | THC2647795      | XLOC_008020  |                                                             |                 | 0,558828102 |
| A_23_P396724  | NM_152759       | LRRC43       | leucine rich repeat containing 43                           | ENST00000289014 | 0,55877518  |
| A_23_P7582    | NM_003202       | TCF7         | transcription factor 7 (T-cell specific, HMG-box)           | ENST00000522653 | 0,557855333 |
| A_24_P341923  | NM_020964       | EPG5         | ectopic P-granules autophagy protein 5 homolog (C. elegan:  | ENST00000308403 | 0,55760457  |

|                |                 |              |                                                                     |  |                 |             |
|----------------|-----------------|--------------|---------------------------------------------------------------------|--|-----------------|-------------|
| A_21_P0007071  | TCONS_00018786  | XLOC_008573  |                                                                     |  |                 | 0,557314906 |
| A_23_P117662   | NM_002112       | HDC          | histidine decarboxylase                                             |  | ENST00000267845 | 0,557179384 |
| A_33_P3291524  | NM_001143939    | ZNF534       | zinc finger protein 534                                             |  | ENST00000332323 | 0,557017125 |
| A_33_P3338270  | NR_033579       | LOC440297    | chondroitin sulfate proteoglycan 4 pseudogene                       |  | ENST00000338938 | 0,556998561 |
| A_23_P104741   | NM_032531       | KIRREL3      | kin of IRRE like 3 (Drosophila)                                     |  | ENST00000525144 | 0,556647709 |
| A_21_P0005061  | TCONS_00012290  | XLOC_005847  |                                                                     |  |                 | 0,555476314 |
| A_33_P3388691  | NM_001039152    | RGS21        | regulator of G-protein signaling 21                                 |  | ENST00000417209 | 0,55515386  |
| A_23_P134454   | NM_001753       | CAV1         | caveolin 1, caveolae protein, 22kDa                                 |  | ENST00000341049 | 0,554562379 |
| A_21_P0003486  | ENST00000514427 | XLOC_004025  |                                                                     |  | ENST00000514427 | 0,554232837 |
| A_33_P3387971  | AK124342        | FLJ42351     | uncharacterized LOC400999                                           |  |                 | 0,5536424   |
| A_23_P501713   | NM_032556       | IL1F10       | interleukin 1 family, member 10 (theta)                             |  | ENST00000496265 | 0,553486032 |
| A_21_P0014094  | XR_108415       | LOC100288092 | uncharacterized LOC100288092                                        |  |                 | 0,553077707 |
| A_33_P3399598  | AK125109        | ABCD4        | ATP-binding cassette, sub-family D (ALD), member 4                  |  |                 | 0,551657461 |
| A_21_P0014692  | XR_111722       | LOC100288781 | uncharacterized LOC100288781                                        |  |                 | 0,551450714 |
| A_21_P0001003  | ENST00000420156 | XLOC_000352  |                                                                     |  | ENST00000420156 | 0,551357541 |
| A_21_P0000017  | NM_001146227    | RPS20        | ribosomal protein S20                                               |  | ENST00000519807 | 0,551238491 |
| A_33_P3254012  | NM_172239       | REXO1L1      | REX1, RNA exonuclease 1 homolog (S. cerevisiae)-like 1              |  | ENST00000425429 | 0,551141386 |
| A_23_P101131   | NM_002091       | GRP          | gastrin-releasing peptide                                           |  | ENST00000256857 | 0,549145531 |
| A_24_P125335   | NM_005408       | CCL13        | chemokine (C-C motif) ligand 13                                     |  | ENST00000225844 | 0,549083542 |
| A_23_P369815   | NM_000639       | FASLG        | Fas ligand (TNF superfamily, member 6)                              |  | ENST00000367721 | 0,548657488 |
| A_21_P0006940  | TCONS_00018395  | XLOC_008678  |                                                                     |  |                 | 0,54768488  |
| A_23_P68511    | NM_015985       | ANGPT4       | angiopoietin 4                                                      |  | ENST00000546022 | 0,546975125 |
| A_23_P77756    | NM_003857       | GALR2        | galanin receptor 2                                                  |  | ENST00000329003 | 0,546174507 |
| A_33_P3233050  | AK124895        | SAMM50       | sorting and assembly machinery component 50 homolog (S. cerevisiae) |  |                 | 0,545882971 |
| A_21_P0009088  | TCONS_00024776  | XLOC_012051  |                                                                     |  |                 | 0,544935037 |
| A_19_P00317144 | AK096731        | XLOC_005595  | 0                                                                   |  |                 | 0,544422778 |
| A_23_P108823   | NM_032523       | OSBPL6       | oxysterol binding protein-like 6                                    |  | ENST00000315022 | 0,54436572  |
| A_21_P0009380  | TCONS_00025844  | XLOC_012115  |                                                                     |  |                 | 0,54386176  |
| A_21_P0004648  | ENST00000414875 | XLOC_005279  |                                                                     |  | ENST00000414875 | 0,543267243 |

|                |                 |              |                                                          |                 |             |
|----------------|-----------------|--------------|----------------------------------------------------------|-----------------|-------------|
| A_23_P10232    | NM_017935       | BANK1        | B-cell scaffold protein with ankyrin repeats 1           | ENST00000322953 | 0,542831429 |
| A_23_P87879    | NM_001781       | CD69         | CD69 molecule                                            | ENST00000228434 | 0,542301054 |
| A_23_P359457   | ENST00000082259 | DNAH2        | dynein, axonemal, heavy chain 2                          | ENST00000082259 | 0,541949423 |
| A_33_P3293888  | NM_002025       | AFF2         | AF4/FMR2 family, member 2                                | ENST00000342251 | 0,541128616 |
| A_24_P150466   | NM_001034852    | SMOC1        | SPARC related modular calcium binding 1                  | ENST00000381280 | 0,540826911 |
| A_23_P45955    | NM_014466       | TEKT2        | tektin 2 (testicular)                                    | ENST00000469024 | 0,540165488 |
| A_21_P0014768  | XR_132536       | LOC100653016 | uncharacterized LOC100653016                             |                 | 0,53987038  |
| A_21_P0004085  | ENST00000507681 | XLOC_004679  |                                                          | ENST00000507681 | 0,539384028 |
| A_21_P0006135  | TCONS_00015940  | XLOC_007308  |                                                          |                 | 0,539220234 |
| A_33_P3269208  | NM_001001850    | STX19        | syntaxin 19                                              | ENST00000315099 | 0,539003428 |
| A_33_P3743432  | AY746433        | DEFA8P       | defensin, alpha 8 pseudogene                             |                 | 0,538373811 |
| A_23_P348524   | NM_001007125    | C20orf201    | chromosome 20 open reading frame 201                     | ENST00000308906 | 0,5381502   |
| A_21_P0006195  | TCONS_00016107  | XLOC_007494  |                                                          |                 | 0,538062061 |
| A_19_P00812562 | XM_001716361    | LOC388210    | apolipoporphorins-like                                   |                 | 0,537625011 |
| A_23_P360754   | NM_005099       | ADAMTS4      | ADAM metallopeptidase with thrombospondin type 1 motif   | ENST00000367996 | 0,537548847 |
| A_24_P512054   | NM_024045       | DDX50        | DEAD (Asp-Glu-Ala-Asp) box polypeptide 50                | ENST00000494889 | 0,537120877 |
| A_33_P3336686  | NM_004669       | CLIC3        | chloride intracellular channel 3                         |                 | 0,536954728 |
| A_23_P113471   | NM_174912       | FAAH2        | fatty acid amide hydrolase 2                             | ENST00000491179 | 0,536861838 |
| A_21_P0009037  | THC2662545      | XLOC_011950  |                                                          |                 | 0,536208737 |
| A_21_P0008516  | TCONS_00023013  | XLOC_010868  |                                                          |                 | 0,535246658 |
| A_33_P3376116  | NM_182513       | SPC24        | SPC24, NDC80 kinetochore complex component, homolog (    | ENST00000423327 | 0,534003584 |
| A_21_P0014847  | XR_132718       | LOC100506802 | uncharacterized LOC100506802                             |                 | 0,533865479 |
| A_33_P3255627  | NM_001142579    | ZNF780A      | zinc finger protein 780A                                 | ENST00000414720 | 0,533841188 |
| A_19_P00319407 | NM_024534       | ERVMER34-1   | endogenous retrovirus group MER34, member 1              |                 | 0,533688907 |
| A_21_P0007195  | TCONS_00019278  | XLOC_009111  |                                                          |                 | 0,532890415 |
| A_23_P11841    | NM_001684       | ATP2B4       | ATPase, Ca <sup>++</sup> transporting, plasma membrane 4 | ENST00000341360 | 0,532731876 |
| A_23_P7582     | NM_003202       | TCF7         | transcription factor 7 (T-cell specific, HMG-box)        | ENST00000522653 | 0,531872807 |
| A_23_P113471   | NM_174912       | FAAH2        | fatty acid amide hydrolase 2                             | ENST00000491179 | 0,531860847 |
| A_33_P3248265  | NM_002341       | LTB          | lymphotoxin beta (TNF superfamily, member 3)             | ENST00000376117 | 0,531656374 |



|                |                 |              |                                                                      |                 |             |
|----------------|-----------------|--------------|----------------------------------------------------------------------|-----------------|-------------|
| A_23_P365738   | NM_015193       | ARC          | activity-regulated cytoskeleton-associated protein                   | ENST00000356613 | 0,531634994 |
| A_23_P354591   | NM_033446       | FAM125B      | family with sequence similarity 125, member B                        | ENST00000361171 | 0,531608043 |
| A_21_P0014166  | XR_108672       | LOC100506379 | uncharacterized LOC100506379                                         |                 | 0,531596812 |
| A_23_P315789   | NM_000538       | RFXAP        | regulatory factor X-associated protein                               | ENST00000255476 | 0,531493271 |
| A_21_P0014178  | XR_108724       | LOC100505531 | uncharacterized LOC100505531                                         |                 | 0,531305545 |
| A_23_P108743   | NM_152381       | XIRP2        | xin actin-binding repeat containing 2                                | ENST00000295237 | 0,530252101 |
| A_23_P210807   | NM_138283       | CSTL1        | cystatin-like 1                                                      | ENST00000347397 | 0,529917607 |
| A_21_P0005599  | TCONS_00014282  | XLOC_006409  |                                                                      |                 | 0,529506681 |
| A_21_P0006892  | TCONS_00018278  | XLOC_008554  |                                                                      |                 | 0,529340715 |
| A_33_P3392740  | AL831857        | ATOH8        | atonal homolog 8 (Drosophila)                                        | ENST00000463422 | 0,528849265 |
| A_33_P3275233  | AK093561        | LOC100131792 | uncharacterized LOC100131792                                         |                 | 0,528232435 |
| A_23_P253317   | NM_013308       | GPR171       | G protein-coupled receptor 171                                       | ENST00000309180 | 0,527854218 |
| A_33_P3244194  | NM_198402       | PTPLB        | protein tyrosine phosphatase-like (proline instead of cataly         | ENST00000383657 | 0,52741018  |
| A_21_P0008541  | ENST00000554634 | XLOC_011064  |                                                                      | ENST00000554634 | 0,527399425 |
| A_19_P00321068 | NR_003491       | MIAT         |                                                                      |                 | 0,527032725 |
| A_21_P0006781  | XR_110437       | LOC100507633 | uncharacterized LOC100507633                                         | ENST00000432246 | 0,526390473 |
| A_23_P109913   | NM_006564       | CXCR6        | chemokine (C-X-C motif) receptor 6                                   | ENST00000438735 | 0,5263777   |
| A_21_P0003842  | ENST00000508099 | XLOC_003629  |                                                                      | ENST00000508099 | 0,526020511 |
| A_33_P3290898  | NM_015692       | CPAMD8       | C3 and PZP-like, alpha-2-macroglobulin domain containing             | ENST00000388925 | 0,525563518 |
| A_23_P46025    | NM_018208       | ETNK2        | ethanolamine kinase 2                                                | ENST00000367198 | 0,525406633 |
| A_23_P122906   | NM_015570       | AUTS2        | autism susceptibility candidate 2                                    | ENST00000406775 | 0,525112888 |
| A_33_P3342830  | NM_173201       | ATP2A1       | ATPase, Ca <sup>++</sup> transporting, cardiac muscle, fast twitch 1 | ENST00000357084 | 0,525044955 |
| A_23_P27239    | NM_002548       | OR1D2        | olfactory receptor, family 1, subfamily D, member 2                  | ENST00000331459 | 0,524925704 |
| A_23_P113462   | NM_017641       | KIF21A       | kinesin family member 21A                                            | ENST00000395670 | 0,524367697 |
| A_23_P4592     | NM_001245       | SIGLEC6      | sialic acid binding Ig-like lectin 6                                 | ENST00000343300 | 0,523978796 |
| A_19_P00317094 | BC003645        | LOC642776    | uncharacterized LOC642776                                            |                 | 0,523226992 |
| A_23_P313828   | NM_181716       | CENPV        | centromere protein V                                                 | ENST00000299736 | 0,52320175  |
| A_32_P163247   | NM_001768       | CD8A         | CD8a molecule                                                        | ENST00000409511 | 0,52309842  |
| A_24_P396167   | NM_001335       | CTSW         | cathepsin W                                                          | ENST00000307886 | 0,522822976 |

|                |                  |                |                                                                  |                 |  |             |
|----------------|------------------|----------------|------------------------------------------------------------------|-----------------|--|-------------|
| A_21_P0004618  | AK090788         | XLOC_005915    |                                                                  |                 |  | 0,522689707 |
| A_24_P403561   | NM_002334        | LRP4           | low density lipoprotein receptor-related protein 4               | ENST00000529604 |  | 0,522597458 |
| A_21_P0005349  | ENST00000421380  | XLOC_005965    |                                                                  | ENST00000421380 |  | 0,52240835  |
| A_21_P0000827  | NR_038894        | LOC100506428   | uncharacterized LOC100506428                                     |                 |  | 0,522097864 |
| A_23_P103465   | NM_000929        | PLA2G5         | phospholipase A2, group V                                        | ENST00000465698 |  | 0,521758943 |
| A_21_P0004585  | TCONS_00011091   | XLOC_005088    |                                                                  |                 |  | 0,521569259 |
| A_21_P0006355  | DA439958         | XLOC_007429    |                                                                  |                 |  | 0,521515932 |
| A_24_P854492   | NR_003491        | MIAT           | myocardial infarction associated transcript (non-protein coding) |                 |  | 0,521348127 |
| A_21_P0003448  | ENST00000507932  | XLOC_003890    |                                                                  | ENST00000507932 |  | 0,520131049 |
| A_33_P3279610  | NM_005205        | COX6A2         | cytochrome c oxidase subunit VIa polypeptide 2                   | ENST00000287490 |  | 0,519132365 |
| A_23_P126031   | NM_001004469     | OR10J5         | olfactory receptor, family 10, subfamily J, member 5             | ENST00000334857 |  | 0,519072067 |
| A_19_P00315524 | NR_003491        | MIAT           |                                                                  |                 |  | 0,519028597 |
| A_24_P69053    | NM_001080477     | ODZ3           | odz, odd Oz/ten-m homolog 3 (Drosophila)                         | ENST00000406950 |  | 0,518787632 |
| A_23_P125618   | NM_000808        | GABRA3         | gamma-aminobutyric acid (GABA) A receptor, alpha 3               | ENST00000535043 |  | 0,518448432 |
| A_23_P358917   | NM_000765        | CYP3A7         | cytochrome P450, family 3, subfamily A, polypeptide 7            | ENST00000336374 |  | 0,51841695  |
| A_23_P202034   | NR_028134        | GUCY2GP        | guanylate cyclase 2G homolog (mouse), pseudogene                 | ENST00000490269 |  | 0,518277159 |
| A_33_P3252974  | NM_033129        | SCRT2          | scratch homolog 2, zinc finger protein (Drosophila)              | ENST00000246104 |  | 0,517590631 |
| A_23_P121106   | NM_003865        | HESX1          | HESX homeobox 1                                                  | ENST00000295934 |  | 0,517339089 |
| A_21_P0006229  | TCONS_00016163   | XLOC_007573    |                                                                  |                 |  | 0,517027446 |
| A_23_P317756   | NM_202000        | ACSM3          | acyl-CoA synthetase medium-chain family member 3                 | ENST00000440284 |  | 0,517003452 |
| A_21_P0005537  | TCONS_00013994   | XLOC_006638    |                                                                  |                 |  | 0,516994386 |
| A_19_P00327126 | NM_001122636     | GALNT9         | UDP-N-acetyl-alpha-D-galactosamine:polypeptide N-acetylgl        | ENST00000424720 |  | 0,516734706 |
| A_19_P00321858 | ENST00000467692  | LOC100506403   |                                                                  | ENST00000467692 |  | 0,516656401 |
| A_33_P3303857  | NM_001184714     | SLAMF6         | SLAM family member 6                                             | ENST00000368055 |  | 0,516428555 |
| A_33_P3220045  | ENST00000394574  | AKNA           | AT-hook transcription factor                                     | ENST00000394574 |  | 0,51596551  |
| A_33_P3217819  | NM_057749        | CCNE2          | cyclin E2                                                        | ENST00000542725 |  | 0,515115385 |
| A_21_P0010995  | TCONS_I2_0000472 | XLOC_I2_002441 |                                                                  |                 |  | 0,515073393 |
| A_21_P0010438  | AI525606         | XLOC_014364    |                                                                  |                 |  | 0,514975251 |
| A_23_P51565    | NM_003281        | TNNI1          | troponin I type 1 (skeletal, slow)                               | ENST00000556362 |  | 0,514830165 |

|                |                 |                |                                                          |                 |              |
|----------------|-----------------|----------------|----------------------------------------------------------|-----------------|--------------|
| A_21_P0008537  | ENST00000553775 | XLOC_011043    |                                                          | ENST00000553775 | 0,514583731  |
| A_19_P00322706 | NR_003491       | MIAT           |                                                          |                 | 0,514085087  |
| A_33_P3227551  | ENST00000509069 | ZNF331         | zinc finger protein 331                                  | ENST00000509069 | 0,513880983  |
| A_33_P3372752  | XM_003118492    | LOC400682      | zinc finger protein 100-like                             |                 | 0,513090569  |
| A_33_P3293645  | XR_133104       | HYDIN2         | hydrocephalus inducing homolog 2 (mouse)                 |                 | 0,512818109  |
| A_19_P00321356 | ENST00000430555 | XLOC_l2_007834 |                                                          | ENST00000430555 | 0,512786851  |
| A_24_P324314   | NM_001008529    | MXRA7          | matrix-remodelling associated 7                          | ENST00000375036 | 0,51257195   |
| A_21_P0007957  | ENST00000446579 | XLOC_010467    |                                                          | ENST00000446579 | 0,512563783  |
| A_33_P3318611  | AK128825        | LOC100131907   | uncharacterized LOC100131907                             |                 | 0,512440408  |
| A_33_P3316480  | ENST00000529955 | BBS1           | Bardet-Biedl syndrome 1                                  | ENST00000529955 | 0,512227693  |
| A_21_P0010872  | BX091290        | XLOC_l2_001960 |                                                          |                 | 0,511766426  |
| A_21_P0003161  | TCONS_00006619  | XLOC_003225    |                                                          |                 | 0,51117668   |
| A_33_P3393010  | ENST00000492861 | PKDCC          | protein kinase domain containing, cytoplasmic homolog (m | ENST00000492861 | -0,500877878 |
| A_21_P0001214  | ENST00000412995 | XLOC_001151    |                                                          | ENST00000412995 | -0,501058474 |
| A_23_P113111   | NM_000044       | AR             | androgen receptor                                        | ENST00000544984 | -0,501438824 |
| A_21_P0006290  | H95216          | XLOC_007767    |                                                          |                 | -0,501540033 |
| A_33_P3362291  | AK001351        | FLJ10489       | uncharacterized protein FLJ10489                         | ENST00000503718 | -0,501645314 |
| A_19_P00320077 | NM_001164479    | C5orf63        |                                                          | ENST00000535381 | -0,501694553 |
| A_23_P143774   | NM_018995       | MOV10L1        | Mov10l1, Moloney leukemia virus 10-like 1, homolog (mou: | ENST00000545383 | -0,501782863 |
| A_33_P3252381  | NR_015342       | PCA3           | prostate cancer antigen 3 (non-protein coding)           | ENST00000412654 | -0,502196487 |
| A_32_P220463   | NR_024356       | FBLL1          | fibrillar-like 1                                         |                 | -0,502257646 |
| A_21_P0001925  | ENST00000437118 | XLOC_001704    |                                                          | ENST00000437118 | -0,502594554 |
| A_23_P110266   | NM_024574       | NDNF           | neuron-derived neurotrophic factor                       | ENST00000379692 | -0,502765118 |
| A_24_P120537   | NM_152550       | SH3RF2         | SH3 domain containing ring finger 2                      | ENST00000511705 | -0,503055964 |
| A_21_P0003891  | TCONS_00009029  | XLOC_003889    |                                                          |                 | -0,503161579 |
| A_33_P3311795  | ENST00000528345 | MYB            | v-myb myeloblastosis viral oncogene homolog (avian)      | ENST00000528345 | -0,503368481 |
| A_21_P0001217  | ENST00000435542 | XLOC_001182    |                                                          | ENST00000435542 | -0,503408461 |
| A_33_P3265709  | NM_001001657    | OR2Y1          | olfactory receptor, family 2, subfamily Y, member 1      | ENST00000307832 | -0,503701022 |
| A_24_P345679   | NM_001195432    | MLF1           | myeloid leukemia factor 1                                | ENST00000355893 | -0,503979926 |

|                |                   |                |                                                             |                 |              |
|----------------|-------------------|----------------|-------------------------------------------------------------|-----------------|--------------|
| A_33_P3322949  | NR_027151         | C10orf108      | chromosome 10 open reading frame 108                        | ENST00000441152 | -0,504116012 |
| A_24_P402438   | NM_003238         | TGFB2          | transforming growth factor, beta 2                          | ENST00000479322 | -0,50414112  |
| A_23_P369237   | NM_004797         | ADIPOQ         | adiponectin, C1Q and collagen domain containing             | ENST00000412955 | -0,50461215  |
| A_33_P3272849  | ENST00000479767   | LCN8           | lipocalin 8                                                 | ENST00000479767 | -0,504961214 |
| A_33_P3233328  | NM_001001917      | OR56A1         | olfactory receptor, family 56, subfamily A, member 1        | ENST00000316650 | -0,50501274  |
| A_19_P00318329 | ENST00000510938   | XLOC_004789    |                                                             | ENST00000510938 | -0,505479572 |
| A_33_P3323928  | NR_026762         | LINC00263      | long intergenic non-protein coding RNA 263                  |                 | -0,505842367 |
| A_21_P0009482  | DA696352          | XLOC_012682    |                                                             |                 | -0,506327288 |
| A_23_P99625    | NM_203402         | FITM1          | fat storage-inducing transmembrane protein 1                | ENST00000267426 | -0,506661228 |
| A_23_P349343   | NM_139163         | ALS2CR12       | amyotrophic lateral sclerosis 2 (juvenile) chromosome regic | ENST00000494223 | -0,507080481 |
| A_21_P0013362  | ENST00000458645   | XLOC_I2_014077 |                                                             | ENST00000458645 | -0,50753449  |
| A_23_P62999    | NM_004455         | EXTL1          | exostoses (multiple)-like 1                                 | ENST00000374280 | -0,507725179 |
| A_21_P0007484  | NR_040245         | LOC100287314   | uncharacterized LOC100287314                                | ENST00000547804 | -0,507991808 |
| A_33_P3373046  | NM_001024596      | ZNF772         | zinc finger protein 772                                     | ENST00000291809 | -0,508200218 |
| A_33_P3418710  | NM_001080830      | PRAMEF12       | PRAME family member 12                                      | ENST00000357726 | -0,508426433 |
| A_23_P117580   | NM_001249         | ENTPD5         | ectonucleoside triphosphate diphosphohydrolase 5            | ENST00000334696 | -0,508682107 |
| A_33_P3274416  | NR_034179         | LOC653712      | intraflagellar transport 122 homolog (Chlamydomonas) pse    | ENST00000480931 | -0,509159281 |
| A_23_P41145    | NM_138805         | FAM3D          | family with sequence similarity 3, member D                 | ENST00000358781 | -0,509797595 |
| A_21_P0013157  | ENST00000412602   | XLOC_I2_013125 |                                                             | ENST00000412602 | -0,510267222 |
| A_23_P148793   | NR_002925         | FMO9P          | flavin containing monooxygenase 9 pseudogene                | ENST00000477875 | -0,51029067  |
| A_21_P0007236  | TCONS_00019385    | XLOC_009208    |                                                             |                 | -0,510421867 |
| A_33_P3214422  | ENST00000483551   | ANP32A         | acidic (leucine-rich) nuclear phosphoprotein 32 family, men | ENST00000483551 | -0,5104817   |
| A_21_P0010213  | THC2662635        | XLOC_014105    |                                                             |                 | -0,510632881 |
| A_21_P0000521  | NR_027097         | LOC100271832   | uncharacterized LOC100271832                                |                 | -0,510705397 |
| A_21_P0006150  | TCONS_00016002    | XLOC_007393    |                                                             |                 | -0,510743464 |
| A_23_P107116   | NM_007148         | RNF112         | ring finger protein 112                                     |                 | -0,511351233 |
| A_21_P0007865  | TCONS_00021257    | XLOC_009955    |                                                             |                 | -0,511392894 |
| A_21_P0013210  | TCONS_I2_0002592! | XLOC_I2_013436 |                                                             |                 | -0,511548639 |
| A_33_P3256920  | NM_058238         | WNT7B          | wingless-type MMTV integration site family, member 7B       | ENST00000339464 | -0,511780697 |

|                |                 |              |                                                           |                 |  |              |
|----------------|-----------------|--------------|-----------------------------------------------------------|-----------------|--|--------------|
| A_21_P0004818  | TCONS_00011641  | XLOC_005126  |                                                           |                 |  | -0,512070373 |
| A_21_P0003939  | AK128486        | XLOC_004860  |                                                           |                 |  | -0,51227695  |
| A_33_P3329622  | ENST00000395690 | HEATR8       | HEAT repeat containing 8                                  | ENST00000395690 |  | -0,512503408 |
| A_33_P3305288  | NM_198504       | PAQR9        | progesterone and adipoQ receptor family member IX         | ENST00000340634 |  | -0,51274972  |
| A_19_P00806593 | TCONS_00011799  | XLOC_005273  |                                                           |                 |  | -0,513416638 |
| A_21_P0009052  | TCONS_00024703  | XLOC_011981  |                                                           |                 |  | -0,513777511 |
| A_23_P11081    | NM_003886       | AKAP4        | A kinase (PRKA) anchor protein 4                          | ENST00000376064 |  | -0,51391807  |
| A_33_P3366019  | NR_024481       | FAM205B      | transmembrane protein C9orf144B pseudogene                | ENST00000399773 |  | -0,51431642  |
| A_21_P0010124  | TCONS_00028710  | XLOC_013812  |                                                           |                 |  | -0,51442273  |
| A_33_P3263906  | ENST00000368657 | TUBE1        | tubulin, epsilon 1                                        | ENST00000368657 |  | -0,514470776 |
| A_21_P0004132  | ENST00000512882 | XLOC_004844  |                                                           | ENST00000512882 |  | -0,51459951  |
| A_24_P226332   | NM_004440       | EPHA7        | EPH receptor A7                                           | ENST00000369303 |  | -0,514779309 |
| A_21_P0006259  | TCONS_00016286  | XLOC_007661  |                                                           |                 |  | -0,514898292 |
| A_33_P3262685  | NR_024591       | POM121L1P    | POM121 membrane glycoprotein-like 1, pseudogene           | ENST00000414583 |  | -0,514993481 |
| A_21_P0003716  | TCONS_00008415  | XLOC_003867  |                                                           |                 |  | -0,515001373 |
| A_24_P857527   | NR_024045       | RAET1K       | retinoic acid early transcript 1K pseudogene              | ENST00000533735 |  | -0,515111173 |
| A_23_P153797   | NM_004386       | NCAN         | neurocan                                                  | ENST00000252575 |  | -0,515114546 |
| A_23_P104972   | NM_023945       | MS4A5        | membrane-spanning 4-domains, subfamily A, member 5        | ENST00000300190 |  | -0,515429667 |
| A_24_P43826    | NM_022659       | EBF2         | early B-cell factor 2                                     | ENST00000535548 |  | -0,515773476 |
| A_21_P0014180  | ENST00000474396 | GPR146       | G protein-coupled receptor 146                            | ENST00000474396 |  | -0,515825255 |
| A_21_P0002055  | ENST00000444672 | XLOC_002117  |                                                           | ENST00000444672 |  | -0,515842198 |
| A_23_P129169   | NM_000781       | CYP11A1      | cytochrome P450, family 11, subfamily A, polypeptide 1    | ENST00000435365 |  | -0,516614077 |
| A_23_P170888   | NM_001039350    | DPP6         | dipeptidyl-peptidase 6                                    | ENST00000332007 |  | -0,516938596 |
| A_23_P79302    | NM_177964       | LYPD6B       | LY6/PLAUR domain containing 6B                            | ENST00000409876 |  | -0,517123647 |
| A_21_P0010316  | TCONS_00029251  | XLOC_013981  |                                                           |                 |  | -0,51792142  |
| A_23_P111311   | NM_144497       | AKAP12       | A kinase (PRKA) anchor protein 12                         | ENST00000253332 |  | -0,517980768 |
| A_32_P4626     | XR_108654       | LOC100505880 | uncharacterized LOC100505880                              |                 |  | -0,518053112 |
| A_33_P3418091  | NM_001130136    | ISLR2        | immunoglobulin superfamily containing leucine-rich repeat | ENST00000395121 |  | -0,518135297 |
| A_33_P3271652  | NM_032425       | HHIPL1       | HHIP-like 1                                               | ENST00000357223 |  | -0,518149892 |



|                |                 |                |                                                                      |                 |              |
|----------------|-----------------|----------------|----------------------------------------------------------------------|-----------------|--------------|
| A_23_P344481   | NM_152709       | STOX1          | storkhead box 1                                                      | ENST00000399169 | -0,518293879 |
| A_21_P0009865  | ENST00000366097 | XLOC_013582    |                                                                      | ENST00000366097 | -0,518363952 |
| A_23_P58854    | NM_058244       | WNT8A          | wingless-type MMTV integration site family, member 8A                | ENST00000398754 | -0,518639558 |
| A_21_P0008835  | TCONS_00023984  | XLOC_011316    |                                                                      |                 | -0,518697821 |
| A_21_P0001049  | ENST00000427825 | XLOC_000515    |                                                                      | ENST00000427825 | -0,519141589 |
| A_23_P96291    | NM_004988       | MAGEA1         | melanoma antigen family A, 1 (directs expression of antigen)         | ENST00000356661 | -0,519437273 |
| A_21_P0007333  | TCONS_00019602  | XLOC_009404    |                                                                      |                 | -0,519678513 |
| A_21_P0005429  | TCONS_00013589  | XLOC_006248    |                                                                      |                 | -0,519877045 |
| A_21_P0000122  | NM_001195081    | LOC100288814   | uncharacterized protein LOC100288814                                 |                 | -0,520066346 |
| A_21_P0001548  | TCONS_00001584  | XLOC_000917    |                                                                      |                 | -0,520157616 |
| A_24_P277934   | NM_000089       | COL1A2         | collagen, type I, alpha 2                                            | ENST00000464916 | -0,520215519 |
| A_23_P369237   | NM_004797       | ADIPOQ         | adiponectin, C1Q and collagen domain containing                      | ENST00000412955 | -0,520611217 |
| A_21_P0010083  | TCONS_00028505  | XLOC_013471    |                                                                      |                 | -0,520918763 |
| A_21_P0008695  | TCONS_00023549  | XLOC_011383    |                                                                      |                 | -0,521141674 |
| A_33_P3235177  | NM_144993       | TET3           | tet methylcytosine dioxygenase 3                                     | ENST00000409262 | -0,521165287 |
| A_23_P130435   | NM_030657       | LIM2           | lens intrinsic membrane protein 2, 19kDa                             | ENST00000221973 | -0,521521838 |
| A_23_P108734   | NM_018436       | ALLC           | allantoicase                                                         | ENST00000471711 | -0,521545427 |
| A_23_P30567    | NM_001882       | CRHBP          | corticotropin releasing hormone binding protein                      | ENST00000503763 | -0,521948448 |
| A_21_P0008798  | THC2701769      | XLOC_011603    |                                                                      |                 | -0,521964516 |
| A_33_P3222807  | ENST00000297423 | KIAA0146       | KIAA0146                                                             | ENST00000297423 | -0,522053215 |
| A_33_P3334923  | NR_028138       | LOC338758      | uncharacterized LOC338758                                            |                 | -0,52273099  |
| A_19_P00317431 | NR_027103       | LOC285375      | uncharacterized LOC285375                                            | ENST00000419618 | -0,522884602 |
| A_21_P0011365  | XR_132589       | LOC100652840   | u3 small nucleolar ribonucleoprotein protein MPP10-like              |                 | -0,523447793 |
| A_21_P0014225  | XR_108921       | LOC100505905   | uncharacterized LOC100505905                                         |                 | -0,523469106 |
| A_33_P3331125  | NM_145176       | SLC2A12        | solute carrier family 2 (facilitated glucose transporter), member 12 |                 | -0,523595727 |
| A_33_P3401477  | XR_112756       | LOC100130172   | uncharacterized LOC100130172                                         |                 | -0,523616651 |
| A_21_P0009765  | TCONS_00027311  | XLOC_013309    |                                                                      |                 | -0,523641566 |
| A_24_P184732   | NM_173462       | PAPLN          | papilin, proteoglycan-like sulfated glycoprotein                     | ENST00000394134 | -0,523684543 |
| A_21_P0012800  | ENST00000513895 | XLOC_I2_011281 |                                                                      | ENST00000513895 | -0,523947937 |

|                |                 |                |                                                            |                 |              |
|----------------|-----------------|----------------|------------------------------------------------------------|-----------------|--------------|
| A_32_P3476     | NM_203400       | RPRML          | reprimo-like                                               | ENST00000322329 | -0,524373042 |
| A_23_P107116   | NM_007148       | RNF112         | ring finger protein 112                                    |                 | -0,524525571 |
| A_21_P0010497  | NR_037843       | HOTTIP         | HOXA distal transcript antisense RNA (non-protein coding)  |                 | -0,52495334  |
| A_19_P00318187 | ENST00000417485 | XLOC_001849    |                                                            | ENST00000417485 | -0,525665032 |
| A_23_P403335   | NM_015065       | EXPH5          | exophilin 5                                                | ENST00000525344 | -0,525872388 |
| A_21_P0013838  | AL528462        | XLOC_I2_015855 |                                                            |                 | -0,525877026 |
| A_33_P3213029  | NM_017763       | RNF43          | ring finger protein 43                                     | ENST00000407977 | -0,52593072  |
| A_33_P3345041  | NR_026830       | FLJ32063       | uncharacterized LOC150538                                  |                 | -0,526636065 |
| A_21_P0013620  | ENST00000497195 | XLOC_I2_015100 |                                                            | ENST00000497195 | -0,526659104 |
| A_23_P129695   | NM_138440       | VASN           | vasorin                                                    | ENST00000304735 | -0,527241916 |
| A_33_P3305617  | ENST00000359175 | SPTS5B         | serine palmitoyltransferase, small subunit B               | ENST00000359175 | -0,52760075  |
| A_33_P3311473  | NM_020453       | ATP10D         | ATPase, class V, type 10D                                  | ENST00000273859 | -0,527681135 |
| A_23_P256158   | NM_000683       | ADRA2C         | adrenergic, alpha-2C-, receptor                            | ENST00000330055 | -0,527855556 |
| A_21_P0011757  | BF229395        | XLOC_I2_007096 |                                                            |                 | -0,528054076 |
| A_33_P3319905  | NM_018643       | TREM1          | triggering receptor expressed on myeloid cells 1           |                 | -0,528141349 |
| A_33_P3306762  | ENST00000371801 | OLFM1          | olfactomedin 1                                             | ENST00000371801 | -0,52829018  |
| A_21_P0010650  | ENST00000422716 | XLOC_I2_001089 |                                                            | ENST00000422716 | -0,528577621 |
| A_21_P0009743  | TCONS_00027223  | XLOC_013263    |                                                            |                 | -0,52861723  |
| A_21_P0014407  | XR_109629       | LOC100506348   | uncharacterized LOC100506348                               |                 | -0,528834051 |
| A_21_P0006217  | TCONS_00016141  | XLOC_007536    |                                                            |                 | -0,529339379 |
| A_24_P401768   | NM_130847       | AMOTL1         | angiomin like 1                                            | ENST00000317829 | -0,529608158 |
| A_21_P0001603  | ENST00000436955 | XLOC_001126    |                                                            | ENST00000436955 | -0,5301113   |
| A_33_P3260317  | NM_033334       | NR6A1          | nuclear receptor subfamily 6, group A, member 1            | ENST00000487099 | -0,530474598 |
| A_23_P123402   | NM_184086       | TRIM55         | tripartite motif containing 55                             | ENST00000276573 | -0,530806029 |
| A_21_P0004456  | AK054753        | XLOC_005049    |                                                            |                 | -0,531102018 |
| A_21_P0005496  | TCONS_00013799  | XLOC_006439    |                                                            |                 | -0,53121106  |
| A_33_P3383292  | NR_033940       | LOC100129620   | uncharacterized LOC100129620                               | ENST00000425113 | -0,531610475 |
| A_33_P3246028  | NM_001099434    | DCDC2B         | doublecortin domain containing 2B                          | ENST00000409358 | -0,531614726 |
| A_23_P110319   | NM_025087       | CWH43          | cell wall biogenesis 43 C-terminal homolog (S. cerevisiae) | ENST00000226432 | -0,531796832 |

|                |                 |                |                                                              |                 |              |
|----------------|-----------------|----------------|--------------------------------------------------------------|-----------------|--------------|
| A_33_P3355703  | NM_001012706    | C14orf182      | chromosome 14 open reading frame 182                         | ENST00000399206 | -0,531815044 |
| A_33_P3336592  | AK127052        | LOC100499221   | uncharacterized LOC100499221                                 |                 | -0,532009296 |
| A_21_P0002200  | TCONS_00003640  | XLOC_001430    |                                                              |                 | -0,532074599 |
| A_21_P0004149  | ENST00000506041 | XLOC_004916    |                                                              | ENST00000506041 | -0,532711405 |
| A_19_P00322953 | ENST00000450531 | XLOC_002319    |                                                              | ENST00000450531 | -0,532767274 |
| A_33_P3300985  | XM_001716667    | LOC731932      | uncharacterized LOC731932                                    |                 | -0,53309485  |
| A_21_P0000292  | NR_002829       | P2RX6P         | purinergic receptor P2X, ligand-gated ion channel, 6 pseudoc | ENST00000439119 | -0,533130128 |
| A_23_P121665   | NM_020777       | SORCS2         | sortilin-related VPS10 domain containing receptor 2          | ENST00000507866 | -0,533284156 |
| A_24_P228149   | NM_002274       | KRT13          | keratin 13                                                   | ENST00000157775 | -0,533438519 |
| A_21_P0014827  | XR_132674       | LOC100287166   | uncharacterized LOC100287166                                 |                 | -0,534062153 |
| A_23_P103349   | NM_022375       | OCLM           | oculomedin                                                   |                 | -0,534193471 |
| A_21_P0014755  | XR_132497       | LOC100652966   | uncharacterized LOC100652966                                 |                 | -0,53433632  |
| A_21_P0014009  | NM_001098844    | TMEM236        | transmembrane protein 236                                    | ENST00000338221 | -0,534378428 |
| A_24_P246841   | NM_004277       | SLC25A27       | solute carrier family 25, member 27                          | ENST00000355073 | -0,534638097 |
| A_23_P369237   | NM_004797       | ADIPOQ         | adiponectin, C1Q and collagen domain containing              | ENST00000412955 | -0,534688583 |
| A_23_P101671   | NM_033064       | ATCAY          | ataxia, cerebellar, Cayman type                              | ENST00000450849 | -0,534752412 |
| A_21_P0014111  | ENST00000490351 | LOC100506708   |                                                              | ENST00000490351 | -0,534883712 |
| A_21_P0013460  | ENST00000447933 | XLOC_I2_014077 |                                                              | ENST00000447933 | -0,534966242 |
| A_33_P3222653  | NR_033938       | LOC100131366   | uncharacterized LOC100131366                                 |                 | -0,535239019 |
| A_21_P0003336  | ENST00000514103 | XLOC_003458    |                                                              | ENST00000514103 | -0,53538926  |
| A_23_P110851   | NM_198253       | TERT           | telomerase reverse transcriptase                             | ENST00000296820 | -0,535570393 |
| A_23_P70968    | NM_006896       | HOXA7          | homeobox A7                                                  | ENST00000242159 | -0,535773026 |
| A_23_P345678   | NM_033084       | FANCD2         | Fanconi anemia, complementation group D2                     | ENST00000287647 | -0,535870584 |
| A_21_P0012329  | THC2522425      | XLOC_I2_009441 |                                                              |                 | -0,536059355 |
| A_23_P118854   | NM_003770       | KRT37          | keratin 37                                                   |                 | -0,536455283 |
| A_33_P3877992  | NR_038881       | LOC286190      | uncharacterized LOC286190                                    | ENST00000499227 | -0,536720075 |
| A_32_P306678   | NM_001145065    | FAM190A        | family with sequence similarity 190, member A                | ENST00000509176 | -0,537162376 |
| A_33_P3350863  | NM_020415       | RETN           | resistin                                                     | ENST00000221515 | -0,53732893  |
| A_24_P203106   | NM_002625       | PFKFB1         | 6-phosphofructo-2-kinase/fructose-2,6-biphosphatase 1        | ENST00000374992 | -0,537582052 |

|                |                                 |                |                                                                            |                 |              |
|----------------|---------------------------------|----------------|----------------------------------------------------------------------------|-----------------|--------------|
| A_21_P0000267  | NR_002583                       | SNORD72        | small nucleolar RNA, C/D box 72                                            |                 | -0,537590877 |
| A_23_P71598    | NM_003829                       | MPDZ           | multiple PDZ domain protein                                                | ENST00000319198 | -0,537969321 |
| A_23_P352426   | NM_006382                       | CDRT1          | CMT1A duplicated region transcript 1                                       | ENST00000395906 | -0,538039635 |
| A_23_P392429   | NM_145756                       | ZNF396         | zinc finger protein 396                                                    | ENST00000306346 | -0,538246186 |
| A_33_P3233025  | NM_001135995                    | ATXN3L         | ataxin 3-like                                                              | ENST00000380622 | -0,53869249  |
| A_19_P00318544 | ENST00000455821                 | XLOC_002977    |                                                                            | ENST00000455821 | -0,538898987 |
| A_23_P66767    | NM_153338                       | GGT6           | gamma-glutamyltransferase 6                                                | ENST00000414312 | -0,539129013 |
| A_23_P107116   | NM_007148                       | RNF112         | ring finger protein 112                                                    |                 | -0,540024376 |
| A_21_P0011521  | TCONS_I2_0001060;XLOC_I2_005692 |                |                                                                            |                 | -0,540086693 |
| A_21_P0002081  | ENST00000447761                 | XLOC_002234    |                                                                            | ENST00000447761 | -0,540130624 |
| A_23_P101319   | NM_152354                       | ZNF285         | zinc finger protein 285                                                    | ENST00000544719 | -0,541004318 |
| A_19_P00811812 | NM_201274                       | MPRIP          | myosin phosphatase Rho interacting protein                                 |                 | -0,541828338 |
| A_23_P89249    | NM_001005862                    | ERBB2          | v-erb-b2 erythroblastic leukemia viral oncogene homolog 2, ENST00000406381 |                 | -0,541879932 |
| A_33_P3333177  | XR_112044                       | LOC644083      | uncharacterized LOC644083                                                  |                 | -0,541899339 |
| A_21_P0003637  | TCONS_00008198                  | XLOC_003650    |                                                                            |                 | -0,542034937 |
| A_21_P0010989  | TCONS_I2_0000470;XLOC_I2_002433 |                |                                                                            |                 | -0,54265432  |
| A_33_P3378556  | NM_000128                       | F11            | coagulation factor XI                                                      | ENST00000403665 | -0,543161084 |
| A_32_P935906   | NR_026974                       | C8orf77        | chromosome 8 open reading frame 77                                         | ENST00000527067 | -0,543453204 |
| A_21_P0004641  | NM_001198815                    | MUC22          | mucin 22                                                                   | ENST00000416716 | -0,543953403 |
| A_21_P0001858  | XR_109987                       | LOC100506235   | uncharacterized LOC100506235                                               | ENST00000432064 | -0,544003446 |
| A_33_P3287068  | BC027486                        | LOC728437      | hCG2020170                                                                 |                 | -0,544532017 |
| A_19_P00319044 | ENST00000416534                 | XLOC_I2_007880 |                                                                            | ENST00000416534 | -0,544738131 |
| A_33_P3337921  | XR_109991                       | LOC727944      | uncharacterized LOC727944                                                  |                 | -0,544899975 |
| A_33_P3257474  | NM_001042367                    | C15orf60       | chromosome 15 open reading frame 60                                        | ENST00000331090 | -0,545391779 |
| A_23_P105524   | NM_033123                       | PLCZ1          | phospholipase C, zeta 1                                                    | ENST00000539875 | -0,545416032 |
| A_21_P0013137  | ENST00000473271                 | TCP10L2        | t-complex 10-like 2 (mouse)                                                | ENST00000473271 | -0,545529462 |
| A_24_P100830   | NM_001113402                    | AMN1           | antagonist of mitotic exit network 1 homolog (S. cerevisiae)               | ENST00000281471 | -0,545714736 |
| A_21_P0009125  | TCONS_00025013                  | XLOC_011948    |                                                                            |                 | -0,545988321 |
| A_21_P0008960  | THC2655745                      | XLOC_011758    |                                                                            |                 | -0,546129617 |

|                |                  |                |                                                             |                 |              |
|----------------|------------------|----------------|-------------------------------------------------------------|-----------------|--------------|
| A_23_P110266   | NM_024574        | NDNF           | neuron-derived neurotrophic factor                          | ENST00000379692 | -0,546287225 |
| A_23_P113553   | NM_001011544     | MAGEA11        | melanoma antigen family A, 11                               | ENST00000355220 | -0,546383155 |
| A_33_P3302657  | ENST00000376525  | TLE4           | transducin-like enhancer of split 4 (E(sp1) homolog, Drosop | ENST00000376525 | -0,546685203 |
| A_21_P0004584  | ENST00000521128  | XLOC_005087    |                                                             | ENST00000521128 | -0,547456054 |
| A_21_P0009372  | TCONS_00025789   | XLOC_012596    |                                                             |                 | -0,547469128 |
| A_23_P420692   | NM_015053        | PPFIA4         | protein tyrosine phosphatase, receptor type, f polypeptide  | ENST00000295706 | -0,547506053 |
| A_19_P00807507 | TCONS_00019683   | XLOC_009483    |                                                             |                 | -0,547660143 |
| A_33_P3226008  | NM_001190259     | GCET2          | germinal center expressed transcript 2                      | ENST00000495418 | -0,547769871 |
| A_23_P121545   | NM_201591        | GPM6A          | glycoprotein M6A                                            | ENST00000280187 | -0,547771724 |
| A_33_P3254078  | ENST00000471669  | C9orf68        | chromosome 9 open reading frame 68                          | ENST00000471669 | -0,54778313  |
| A_23_P114314   | NM_005193        | CDX4           | caudal type homeobox 4                                      | ENST00000373514 | -0,547844346 |
| A_21_P0006296  | TCONS_00016407   | XLOC_007778    |                                                             |                 | -0,547960518 |
| A_19_P00318505 | NR_026961        | LOC284837      | uncharacterized LOC284837                                   | ENST00000400385 | -0,547984358 |
| A_21_P0006278  | TCONS_00016357   | XLOC_007737    |                                                             |                 | -0,54809311  |
| A_23_P123228   | NM_000111        | SLC26A3        | solute carrier family 26, member 3                          | ENST00000340010 | -0,548141449 |
| A_33_P3296697  | NR_002801        | PHF2P1         | PHD finger protein 2 pseudogene 1                           |                 | -0,548142939 |
| A_33_P3385785  | NM_005621        | S100A12        | S100 calcium binding protein A12                            | ENST00000368736 | -0,548275065 |
| A_21_P0001661  | TCONS_00001929   | XLOC_000036    |                                                             |                 | -0,548360362 |
| A_21_P0001522  | TCONS_00001535   | XLOC_000881    |                                                             |                 | -0,548416304 |
| A_23_P73632    | NM_000475        | NR0B1          | nuclear receptor subfamily 0, group B, member 1             | ENST00000378970 | -0,548631502 |
| A_33_P3548190  | NR_034024        | LINC00347      | long intergenic non-protein coding RNA 347                  |                 | -0,548678654 |
| A_24_P121406   | NM_015070        | ZC3H13         | zinc finger CCCH-type containing 13                         | ENST00000282007 | -0,548882095 |
| A_23_P10206    | NM_005328        | HAS2           | hyaluronan synthase 2                                       | ENST00000303924 | -0,548893259 |
| A_19_P00806450 | TCONS_I2_0000602 | XLOC_I2_003234 |                                                             |                 | -0,549352864 |
| A_21_P0004128  | BE265759         | XLOC_004815    |                                                             |                 | -0,54944076  |
| A_21_P0006327  | ENST00000454408  | XLOC_007867    |                                                             | ENST00000454408 | -0,549503236 |
| A_21_P0012111  | TCONS_I2_0001615 | XLOC_I2_008546 |                                                             |                 | -0,549517006 |
| A_21_P0002455  | TCONS_00004296   | XLOC_002142    |                                                             |                 | -0,549645905 |
| A_23_P38304    | NM_145273        | CD300LG        | CD300 molecule-like family member g                         | ENST00000293396 | -0,549932558 |



|                |                 |                |                                                           |                 |              |
|----------------|-----------------|----------------|-----------------------------------------------------------|-----------------|--------------|
| A_33_P3222659  | AK026448        | AGSK1          | golgin subfamily A member 2-like                          |                 | -0,5499537   |
| A_23_P17811    | NM_012429       | SEC14L2        | SEC14-like 2 ( <i>S. cerevisiae</i> )                     | ENST00000478762 | -0,550066126 |
| A_33_P3227798  | AK124439        | LOC100129995   | uncharacterized LOC100129995                              | ENST00000379677 | -0,550165621 |
| A_24_P271830   | NR_034145       | FLJ34690       | uncharacterized protein FLJ34690                          |                 | -0,550355366 |
| A_32_P416161   | NM_212559       | XKRX           | XK, Kell blood group complex subunit-related, X-linked    | ENST00000372956 | -0,550359607 |
| A_33_P3261132  | NR_001560       | CYCSP52        | cytochrome c, somatic pseudogene 52                       |                 | -0,550997151 |
| A_21_P0010796  | NR_040002       | LOC255654      | uncharacterized LOC255654                                 | ENST00000366308 | -0,551458488 |
| A_21_P0009555  | TCONS_00026518  | XLOC_012839    |                                                           |                 | -0,551788644 |
| A_33_P3372727  | NM_003966       | SEMA5A         | sema domain, seven thrombospondin repeats (type 1 and t   | ENST00000382496 | -0,551980058 |
| A_33_P3635527  | NM_001085455    | KRTAP24-1      | keratin associated protein 24-1                           | ENST00000340345 | -0,552240568 |
| A_21_P0008833  | TCONS_00023979  | XLOC_011308    |                                                           |                 | -0,552737862 |
| A_21_P0005919  | TCONS_00015203  | XLOC_006681    |                                                           |                 | -0,552782187 |
| A_21_P0006220  | TCONS_00016144  | XLOC_007542    |                                                           |                 | -0,553271746 |
| A_21_P0004736  | XR_108683       | LOC100506885   | uncharacterized LOC100506885                              |                 | -0,553501313 |
| A_23_P253791   | NM_004345       | CAMP           | cathelicidin antimicrobial peptide                        | ENST00000296435 | -0,554125958 |
| A_21_P0006640  | ENST00000421629 | XLOC_008352    |                                                           | ENST00000421629 | -0,55414157  |
| A_23_P102864   | NM_002772       | TMPRSS15       | transmembrane protease, serine 15                         | ENST00000284885 | -0,554459463 |
| A_19_P00316538 | ENST00000444266 | XLOC_002141    |                                                           | ENST00000444266 | -0,554471244 |
| A_33_P3347057  | AK092662        | LOC100132005   | uncharacterized LOC100132005                              |                 | -0,554691094 |
| A_23_P315212   | NM_012344       | NTSR2          | neurotensin receptor 2                                    | ENST00000306928 | -0,554841981 |
| A_21_P0002838  | ENST00000443087 | XLOC_003025    |                                                           | ENST00000443087 | -0,554950484 |
| A_21_P0014246  | ENST00000443016 | LOC100507213   |                                                           | ENST00000443016 | -0,555845181 |
| A_21_P0004007  | ENST00000515077 | XLOC_004410    |                                                           | ENST00000515077 | -0,555919748 |
| A_21_P0012603  | ENST00000508358 | XLOC_I2_010772 |                                                           | ENST00000508358 | -0,555928157 |
| A_21_P0009554  | BC031271        | XLOC_012833    |                                                           |                 | -0,556075553 |
| A_33_P3280974  | XM_003403822    | ANKRD20A4      | ankyrin repeat domain 20 family, member A4                |                 | -0,556150113 |
| A_33_P3218960  | NM_021098       | CACNA1H        | calcium channel, voltage-dependent, T type, alpha 1H subu | ENST00000348261 | -0,556420786 |
| A_21_P0000391  | NR_003075       | SNORD93        | small nucleolar RNA, C/D box 93                           |                 | -0,556489184 |
| A_21_P0002975  | THC2663070      | XLOC_002701    |                                                           |                 | -0,556493299 |

|               |                  |                |                                                             |                 |              |
|---------------|------------------|----------------|-------------------------------------------------------------|-----------------|--------------|
| A_33_P3214550 | NM_001557        | CXCR2          | chemokine (C-X-C motif) receptor 2                          | ENST00000318507 | -0,55649536  |
| A_24_P177279  | NM_014460        | CSDC2          | cold shock domain containing C2, RNA binding                | ENST00000306149 | -0,556498148 |
| A_21_P0001394 | TCONS_00001215   | XLOC_000482    |                                                             |                 | -0,556539843 |
| A_21_P0006009 | ENST00000422554  | XLOC_007350    |                                                             | ENST00000422554 | -0,556795853 |
| A_33_P3258004 | NM_152788        | ANKS1B         | ankyrin repeat and sterile alpha motif domain containing 1E | ENST00000546960 | -0,556840353 |
| A_21_P0003971 | ENST00000416930  | XLOC_004293    |                                                             | ENST00000416930 | -0,556860631 |
| A_23_P101084  | NM_032598        | SPATA22        | spermatogenesis associated 22                               | ENST00000541913 | -0,556912771 |
| A_23_P121545  | NM_201591        | GPM6A          | glycoprotein M6A                                            | ENST00000280187 | -0,557471224 |
| A_21_P0012364 | TCONS_I2_0001843 | XLOC_I2_009613 |                                                             |                 | -0,557770342 |
| A_33_P3388536 | NR_036504        | LOC728752      | uncharacterized LOC728752                                   |                 | -0,557783716 |
| A_23_P306987  | NM_031439        | SOX7           | SRY (sex determining region Y)-box 7                        | ENST00000304501 | -0,557825661 |
| A_23_P114445  | NM_020932        | MAGEE1         | melanoma antigen family E, 1                                | ENST00000361470 | -0,557871144 |
| A_21_P0000462 | NR_003687        | SNORD19B       | small nucleolar RNA, C/D box 19B                            | ENST00000496254 | -0,558118552 |
| A_23_P116850  | NM_000423        | KRT2           | keratin 2                                                   | ENST00000309680 | -0,558330581 |
| A_33_P3246920 | ENST00000338325  | CSMD2          | CUB and Sushi multiple domains 2                            | ENST00000338325 | -0,558575505 |
| A_23_P110266  | NM_024574        | NDNF           | neuron-derived neurotrophic factor                          | ENST00000379692 | -0,558612205 |
| A_21_P0004069 | ENST00000514942  | XLOC_004592    |                                                             | ENST00000514942 | -0,558646783 |
| A_21_P0005615 | BC031939         | XLOC_006775    |                                                             | ENST00000523507 | -0,558688543 |
| A_23_P369237  | NM_004797        | ADIPOQ         | adiponectin, C1Q and collagen domain containing             | ENST00000412955 | -0,558695459 |
| A_21_P0002340 | TCONS_00003999   | XLOC_001823    |                                                             |                 | -0,558797006 |
| A_23_P111724  | NM_138290        | RUNDC3B        | RUN domain containing 3B                                    | ENST00000493037 | -0,559032619 |
| A_32_P63562   | XR_132800        | LOC100132240   | uncharacterized LOC100132240                                |                 | -0,559463041 |
| A_21_P0004813 | TCONS_00011632   | XLOC_005121    |                                                             |                 | -0,559668133 |
| A_23_P305205  | NM_015314        | KIAA0895       | KIAA0895                                                    | ENST00000317020 | -0,559709168 |
| A_21_P0003626 | THC2525615       | XLOC_003595    |                                                             |                 | -0,559713073 |
| A_33_P3520835 | AK123449         | FLJ41455       | uncharacterized LOC441441                                   |                 | -0,560162286 |
| A_33_P3315564 | NM_001008743     | SULT1C3        | sulfotransferase family, cytosolic, 1C, member 3            | ENST00000329106 | -0,560292666 |
| A_23_P119763  | NM_022436        | ABCG5          | ATP-binding cassette, sub-family G (WHITE), member 5        | ENST00000409962 | -0,560544995 |
| A_21_P0011220 | ENST00000413501  | XLOC_I2_003911 |                                                             | ENST00000413501 | -0,56073273  |

|               |                  |                |                                                                            |                                 |
|---------------|------------------|----------------|----------------------------------------------------------------------------|---------------------------------|
| A_23_P89249   | NM_001005862     | ERBB2          | v-erb-b2 erythroblastic leukemia viral oncogene homolog 2, ENST00000406381 | -0,561024209                    |
| A_21_P0001380 | TCONS_00001180   | XLOC_000443    |                                                                            | -0,561218072                    |
| A_23_P103349  | NM_022375        | OCLM           | oculomedin                                                                 | -0,561381057                    |
| A_23_P213228  | NM_003924        | PHOX2B         | paired-like homeobox 2b                                                    | ENST00000226382<br>-0,561559993 |
| A_33_P3729436 | BF570972         | SNAR-B1        | small ILF3/NF90-associated RNA B1                                          | -0,561621749                    |
| A_21_P0002560 | TCONS_00004652   | XLOC_002560    |                                                                            | -0,561701359                    |
| A_21_P0005724 | TCONS_00014765   | XLOC_006848    |                                                                            | -0,561901448                    |
| A_33_P3424187 | NM_001017363     | ARID3C         | AT rich interactive domain 3C (BRIGHT-like)                                | ENST00000378909<br>-0,562009883 |
| A_21_P0012890 | NR_033906        | LOC442132      | golgin A6 family-like 1 pseudogene                                         | -0,562174005                    |
| A_33_P3240249 | AK125712         | LOC100129125   | uncharacterized LOC100129125                                               | -0,562284952                    |
| A_21_P0009966 | TCONS_00028199   | XLOC_013550    |                                                                            | -0,562366863                    |
| A_21_P0012597 | TCONS_I2_0002059 | XLOC_I2_010724 |                                                                            | -0,562539067                    |
| A_21_P0004758 | ENST00000425089  | XLOC_005749    |                                                                            | ENST00000425089<br>-0,562686941 |
| A_21_P0001136 | ENST00000449812  | XLOC_000850    |                                                                            | ENST00000449812<br>-0,562770075 |
| A_24_P795371  | XR_111553        | LOC644192      | uncharacterized LOC644192                                                  | -0,56281293                     |
| A_21_P0002599 | THC2742479       | XLOC_001544    |                                                                            | -0,563141047                    |
| A_21_P0007600 | TCONS_00020511   | XLOC_009828    |                                                                            | -0,563162025                    |
| A_33_P3266730 | NM_080737        | SYTL4          | synaptotagmin-like 4                                                       | ENST00000263033<br>-0,56332348  |
| A_23_P317760  | NM_173563        | C6orf146       | chromosome 6 open reading frame 146                                        | ENST00000380188<br>-0,563497139 |
| A_23_P101796  | NM_033025        | SYDE1          | synapse defective 1, Rho GTPase, homolog 1 (C. elegans)                    | ENST00000342784<br>-0,563806608 |
| A_21_P0004155 | ENST00000503489  | XLOC_004927    |                                                                            | ENST00000503489<br>-0,56398142  |
| A_21_P0013211 | TCONS_I2_0002592 | XLOC_I2_013437 |                                                                            | -0,563995191                    |
| A_33_P3217307 | ENST00000341885  | ZBTB8OS        | zinc finger and BTB domain containing 8 opposite strand                    | ENST00000341885<br>-0,5640161   |
| A_32_P890614  | NR_026682        | LOC100268168   | uncharacterized LOC100268168                                               | -0,564084262                    |
| A_21_P0008863 | TCONS_00024186   | XLOC_011546    |                                                                            | -0,564228063                    |
| A_23_P144549  | NM_004967        | IBSP           | integrin-binding sialoprotein                                              | ENST00000226284<br>-0,564349476 |
| A_21_P0004901 | TCONS_00011864   | XLOC_005355    |                                                                            | -0,56454259                     |
| A_21_P0002920 | ENST00000418353  | XLOC_003383    |                                                                            | ENST00000418353<br>-0,564574365 |
| A_23_P114883  | NM_002023        | FMOD           | fibromodulin                                                               | ENST00000354955<br>-0,565337582 |

|               |                   |                |                                                                          |                 |              |
|---------------|-------------------|----------------|--------------------------------------------------------------------------|-----------------|--------------|
| A_33_P3269134 | ENST00000409725   | IWS1           | IWS1 homolog ( <i>S. cerevisiae</i> )                                    | ENST00000409725 | -0,566137288 |
| A_21_P0009457 | TCONS_00026283    | XLOC_012628    |                                                                          |                 | -0,566153471 |
| A_23_P344194  | NM_001013635      | C12orf68       | chromosome 12 open reading frame 68                                      | ENST00000316554 | -0,566211312 |
| A_21_P0009900 | ENST00000433587   | XLOC_013729    |                                                                          | ENST00000433587 | -0,566332615 |
| A_23_P114983  | NM_032588         | TRIM63         | tripartite motif containing 63                                           | ENST00000374272 | -0,566424836 |
| A_33_P3394065 | ENST00000376565   | PIP4K2A        | phosphatidylinositol-5-phosphate 4-kinase, type II, alpha                | ENST00000376565 | -0,566857891 |
| A_23_P28969   | NM_176812         | CHMP4B         | charged multivesicular body protein 4B                                   | ENST00000217402 | -0,566904793 |
| A_33_P3337554 | NM_001163993      | ABCB5          | ATP-binding cassette, sub-family B (MDR/TAP), member 5                   | ENST00000406935 | -0,566937623 |
| A_33_P3390713 | ENST00000377043   | TMEM2          | transmembrane protein 2                                                  | ENST00000377043 | -0,566978745 |
| A_21_P0011984 | TCONS_I2_0001506! | XLOC_I2_008405 |                                                                          |                 | -0,567084848 |
| A_33_P3805819 | XR_110455         | LOC100505890   | uncharacterized LOC100505890                                             | ENST00000449805 | -0,567298675 |
| A_23_P102864  | NM_002772         | TMPRSS15       | transmembrane protease, serine 15                                        | ENST00000284885 | -0,56748904  |
| A_21_P0005736 | TCONS_00014799    | XLOC_006874    |                                                                          |                 | -0,567697415 |
| A_33_P3642217 | BE875542          | LINC00165      | long intergenic non-protein coding RNA 165                               |                 | -0,567915663 |
| A_21_P0002815 | ENST00000451348   | XLOC_002950    |                                                                          | ENST00000451348 | -0,568434378 |
| A_21_P0009742 | TCONS_00027203    | XLOC_013243    |                                                                          |                 | -0,568444954 |
| A_21_P0001297 | TCONS_00000942    | XLOC_000194    |                                                                          |                 | -0,568830568 |
| A_21_P0004247 | THC2666140        | XLOC_004366    |                                                                          |                 | -0,569027966 |
| A_21_P0006583 | TCONS_00017540    | XLOC_008223    |                                                                          |                 | -0,569563632 |
| A_23_P106933  | NM_052956         | ACSM1          | acyl-CoA synthetase medium-chain family member 1                         | ENST00000520010 | -0,56966315  |
| A_33_P3832680 | BC127791          | FAM25C         | family with sequence similarity 25, member C                             |                 | -0,570125948 |
| A_23_P329798  | NM_005454         | CER1           | cerberus 1, cysteine knot superfamily, homolog ( <i>Xenopus laevis</i> ) | ENST00000380911 | -0,57067142  |
| A_33_P3299165 | NR_033889         | LOC440131      | uncharacterized LOC440131                                                | ENST00000380640 | -0,570707804 |
| A_23_P101084  | NM_032598         | SPATA22        | spermatogenesis associated 22                                            | ENST00000541913 | -0,571014846 |
| A_21_P0004058 | ENST00000509456   | XLOC_004535    |                                                                          | ENST00000509456 | -0,571050702 |
| A_32_P217390  | NM_173499         | SPATA8         | spermatogenesis associated 8                                             | ENST00000328504 | -0,571751353 |
| A_23_P252236  | NM_000892         | KLKB1          | kallikrein B, plasma (Fletcher factor) 1                                 | ENST00000511406 | -0,571973112 |
| A_21_P0010170 | AB073349          | XLOC_013985    |                                                                          |                 | -0,572221385 |
| A_21_P0004053 | ENST00000503320   | XLOC_004527    |                                                                          | ENST00000503320 | -0,572422169 |

|               |                 |                |                                                              |                 |              |
|---------------|-----------------|----------------|--------------------------------------------------------------|-----------------|--------------|
| A_21_P0007205 | TCONS_00019293  | XLOC_009120    |                                                              |                 | -0,572493309 |
| A_21_P0004543 | TCONS_00010852  | XLOC_004669    |                                                              |                 | -0,572559339 |
| A_21_P0012110 | THC2684837      | XLOC_I2_008546 |                                                              |                 | -0,572591845 |
| A_23_P83498   | NM_006546       | IGF2BP1        | insulin-like growth factor 2 mRNA binding protein 1          | ENST00000290341 | -0,572710827 |
| A_23_P11256   | NM_138703       | MAGEE2         | melanoma antigen family E, 2                                 | ENST00000373359 | -0,572849152 |
| A_21_P0001300 | TCONS_00000949  | XLOC_000205    |                                                              |                 | -0,572897929 |
| A_23_P111311  | NM_144497       | AKAP12         | A kinase (PRKA) anchor protein 12                            | ENST00000253332 | -0,573168551 |
| A_21_P0002977 | BX106648        | XLOC_002707    |                                                              |                 | -0,57323278  |
| A_24_P299210  | ENST00000262676 | TTC39A         | tetratricopeptide repeat domain 39A                          | ENST00000262676 | -0,57337468  |
| A_21_P0006162 | DB077982        | XLOC_007428    |                                                              |                 | -0,573462474 |
| A_21_P0007558 | TCONS_00020424  | XLOC_009752    |                                                              |                 | -0,573608346 |
| A_32_P169505  | NM_001008537    | KIAA2022       | KIAA2022                                                     | ENST00000055682 | -0,573628926 |
| A_33_P3411682 | ENST00000432771 | TRIM49L2       | tripartite motif containing 49-like 2                        | ENST00000432771 | -0,573891091 |
| A_21_P0008398 | TCONS_00022642  | XLOC_010945    |                                                              |                 | -0,573908183 |
| A_24_P297551  | NM_178539       | FAM19A2        | family with sequence similarity 19 (chemokine (C-C motif)-li | ENST00000549379 | -0,574381447 |
| A_33_P3370714 | NM_001166424    | PGC            | progastricsin (pepsinogen C)                                 | ENST00000394278 | -0,574383629 |
| A_21_P0008600 | TCONS_00023319  | XLOC_011181    |                                                              |                 | -0,574777774 |
| A_23_P89249   | NM_001005862    | ERBB2          | v-erb-b2 erythroblastic leukemia viral oncogene homolog 2,   | ENST00000406381 | -0,575098994 |
| A_21_P0002739 | ENST00000412811 | XLOC_002622    |                                                              | ENST00000412811 | -0,575236812 |
| A_23_P121614  | NM_152291       | MUC7           | mucin 7, secreted                                            | ENST00000413702 | -0,575314334 |
| A_21_P0003712 | AA131780        | XLOC_003854    |                                                              |                 | -0,575339905 |
| A_21_P0010093 | TCONS_00028560  | XLOC_013547    |                                                              |                 | -0,575723382 |
| A_33_P3319276 | NM_001122646    | FAM178B        | family with sequence similarity 178, member B                | ENST00000490605 | -0,575949699 |
| A_23_P139434  | NM_006248       | PRB2           | proline-rich protein BstNI subfamily 2                       | ENST00000389362 | -0,576085731 |
| A_33_P3310929 | NM_003474       | ADAM12         | ADAM metallopeptidase domain 12                              | ENST00000368679 | -0,576848097 |
| A_33_P3219384 | NR_024385       | LOC151300      | uncharacterized LOC151300                                    |                 | -0,577344679 |
| A_24_P292253  | NM_030569       | ITIH5          | inter-alpha-trypsin inhibitor heavy chain family, member 5   | ENST00000256861 | -0,577656991 |
| A_21_P0007598 | TCONS_00020509  | XLOC_009826    |                                                              |                 | -0,578143652 |
| A_23_P422212  | NM_173508       | SLC35F3        | solute carrier family 35, member F3                          | ENST00000366617 | -0,578189753 |



|                |                 |             |                                                              |                 |              |
|----------------|-----------------|-------------|--------------------------------------------------------------|-----------------|--------------|
| A_33_P3274930  | ENST00000395936 | PMP22       | peripheral myelin protein 22                                 | ENST00000395936 | -0,578235541 |
| A_33_P3235262  | NM_001135219    | PIP5KL1     | phosphatidylinositol-4-phosphate 5-kinase-like 1             | ENST00000300432 | -0,578397817 |
| A_19_P00315492 | THC2614189      | Q73P46      |                                                              |                 | -0,578403189 |
| A_33_P3418005  | NM_001101357    | CCDC160     | coiled-coil domain containing 160                            | ENST00000370809 | -0,578678578 |
| A_21_P0009668  | TCONS_00026839  | XLOC_013235 |                                                              |                 | -0,578701443 |
| A_23_P94879    | NM_000506       | F2          | coagulation factor II (thrombin)                             | ENST00000311907 | -0,57906627  |
| A_23_P217178   | NM_005462       | MAGEC1      | melanoma antigen family C, 1                                 | ENST00000285879 | -0,579472003 |
| A_33_P3220347  | NM_001103176    | CNPY1       | canopy 1 homolog (zebrafish)                                 | ENST00000321736 | -0,579649645 |
| A_21_P0006164  | TCONS_00016036  | XLOC_007431 |                                                              |                 | -0,579673685 |
| A_23_P106602   | NM_031476       | CRISPLD2    | cysteine-rich secretory protein LCCL domain containing 2     | ENST00000262424 | -0,579687843 |
| A_24_P139665   | NM_016257       | HPCAL4      | hippocalcin like 4                                           | ENST00000450300 | -0,579743656 |
| A_23_P121545   | NM_201591       | GPM6A       | glycoprotein M6A                                             | ENST00000280187 | -0,579898376 |
| A_23_P113553   | NM_001011544    | MAGEA11     | melanoma antigen family A, 11                                | ENST00000355220 | -0,580012081 |
| A_33_P3249259  | NM_198994       | TGM6        | transglutaminase 6                                           | ENST00000202625 | -0,580191949 |
| A_21_P0003078  | THC2635016      | XLOC_002968 |                                                              |                 | -0,580254855 |
| A_23_P170541   | NM_173092       | KCNH6       | potassium voltage-gated channel, subfamily H (eag-related)   | ENST00000314672 | -0,580346964 |
| A_21_P0009790  | TCONS_00027578  | XLOC_013095 |                                                              |                 | -0,580401134 |
| A_33_P3345210  | NM_001164407    | TLCD2       | TLC domain containing 2                                      | ENST00000330676 | -0,580430138 |
| A_23_P114445   | NM_020932       | MAGEE1      | melanoma antigen family E, 1                                 | ENST00000361470 | -0,580729251 |
| A_33_P3400302  | NR_001550       | TTY18       | testis-specific transcript, Y-linked 18 (non-protein coding) | ENST00000438677 | -0,580804701 |
| A_24_P231026   | NM_014191       | SCN8A       | sodium channel, voltage gated, type VIII, alpha subunit      | ENST00000357961 | -0,580953426 |
| A_33_P3225760  | NM_019035       | PCDH18      | protocadherin 18                                             | ENST00000412923 | -0,580965122 |
| A_21_P0013023  | AK125083        | RAB44       | RAB44, member RAS oncogene family                            |                 | -0,580982482 |
| A_21_P0001362  | TCONS_00001091  | XLOC_000336 |                                                              |                 | -0,581064186 |
| A_21_P0006707  | ENST00000445647 | XLOC_008633 |                                                              | ENST00000445647 | -0,581108628 |
| A_21_P0007882  | BC042465        | XLOC_010123 |                                                              |                 | -0,581369443 |
| A_23_P112774   | NM_032611       | PTP4A3      | protein tyrosine phosphatase type IVA, member 3              | ENST00000520105 | -0,581652532 |
| A_23_P15450    | NM_018286       | TMEM100     | transmembrane protein 100                                    | ENST00000299377 | -0,581688805 |
| A_19_P00811706 | NM_005578       | LPP         |                                                              | ENST00000312675 | -0,581871991 |

|                |                 |                |                                                                     |                 |  |              |
|----------------|-----------------|----------------|---------------------------------------------------------------------|-----------------|--|--------------|
| A_21_P0005462  | TCONS_00013671  | XLOC_006327    |                                                                     |                 |  | -0,582276099 |
| A_21_P0010434  | TCONS_00029667  | XLOC_014332    |                                                                     |                 |  | -0,582844306 |
| A_21_P0009348  | TCONS_00025733  | XLOC_012552    |                                                                     |                 |  | -0,583126644 |
| A_23_P416178   | NM_022742       | CCDC136        | coiled-coil domain containing 136                                   | ENST00000471729 |  | -0,583681311 |
| A_21_P0006526  | TCONS_00017291  | XLOC_008111    |                                                                     |                 |  | -0,583782125 |
| A_21_P0010700  | ENST00000432922 | XLOC_I2_000159 |                                                                     | ENST00000432922 |  | -0,58380844  |
| A_24_P75157    | NM_004610       | TCP10          | t-complex 10 homolog (mouse)                                        | ENST00000464222 |  | -0,584428085 |
| A_21_P0007153  | NR_026967       | LOC143666      | uncharacterized LOC143666                                           |                 |  | -0,584568699 |
| A_23_P351837   | NM_001039548    | KLHL35         | kelch-like 35 (Drosophila)                                          | ENST00000460787 |  | -0,584643432 |
| A_21_P0011645  | NR_024626       | LINC00483      | long intergenic non-protein coding RNA 483                          |                 |  | -0,584680189 |
| A_21_P0007551  | TCONS_00020406  | XLOC_009734    |                                                                     |                 |  | -0,584858804 |
| A_19_P00318992 | ENST00000483169 | XLOC_010390    |                                                                     | ENST00000483169 |  | -0,585176469 |
| A_33_P3248903  | NM_058238       | WNT7B          | wingless-type MMTV integration site family, member 7B               | ENST00000339464 |  | -0,585365433 |
| A_23_P108492   | NM_138395       | MARS2          | methionyl-tRNA synthetase 2, mitochondrial                          | ENST00000499940 |  | -0,585419079 |
| A_33_P3417532  | NM_001199799    | ILDR1          | immunoglobulin-like domain containing receptor 1                    | ENST00000344209 |  | -0,585580414 |
| A_33_P3352557  | NM_032110       | DMRTA2         | DMRT-like family A2                                                 | ENST00000404795 |  | -0,585948618 |
| A_33_P3280916  | NR_003141       | SNHG4          | small nucleolar RNA host gene 4 (non-protein coding)                | ENST00000507692 |  | -0,585958958 |
| A_24_P417935   | NR_027032       | LOC100130776   | uncharacterized LOC100130776                                        | ENST00000542466 |  | -0,586011334 |
| A_19_P00315647 | XR_110530       | LOC100507165   | uncharacterized LOC100507165                                        |                 |  | -0,586166178 |
| A_23_P336663   | NM_138817       | SLC7A13        | solute carrier family 7 (anionic amino acid transporter), member 13 | ENST00000419776 |  | -0,58638322  |
| A_21_P0008079  | ENST00000424524 | XLOC_010422    |                                                                     | ENST00000424524 |  | -0,586405306 |
| A_21_P0002539  | THC2736923      | XLOC_002478    |                                                                     |                 |  | -0,586534697 |
| A_33_P3389678  | NM_001077238    | SPPL2B         | signal peptide peptidase-like 2B                                    | ENST00000452401 |  | -0,586714956 |
| A_33_P3370060  | NM_001199417    | ARHGAP23       | Rho GTPase activating protein 23                                    | ENST00000443378 |  | -0,586945447 |
| A_33_P3331335  | NM_144993       | TET3           | tet methylcytosine dioxygenase 3                                    | ENST00000233310 |  | -0,586945659 |
| A_23_P114445   | NM_020932       | MAGEE1         | melanoma antigen family E, 1                                        | ENST00000361470 |  | -0,587753175 |
| A_21_P0004776  | ENST00000430672 | XLOC_005827    |                                                                     | ENST00000430672 |  | -0,588280494 |
| A_21_P0000446  | NR_003325       | SNORD116-10    | small nucleolar RNA, C/D box 116-10                                 |                 |  | -0,58844219  |
| A_33_P3234949  | NM_017551       | GRID1          | glutamate receptor, ionotropic, delta 1                             | ENST00000464741 |  | -0,589004873 |

|                |                 |                |                                                           |  |                 |              |
|----------------|-----------------|----------------|-----------------------------------------------------------|--|-----------------|--------------|
| A_21_P0005998  | BC045688        | XLOC_007280    |                                                           |  |                 | -0,58903819  |
| A_21_P0008276  | ENST00000532515 | XLOC_011043    |                                                           |  | ENST00000532515 | -0,589394231 |
| A_21_P0011593  | ENST00000358337 | WDR55          | WD repeat domain 55                                       |  | ENST00000358337 | -0,590382188 |
| A_32_P202013   | NM_001039762    | FAM196A        | family with sequence similarity 196, member A             |  | ENST00000522781 | -0,591141717 |
| A_21_P0001632  | TCONS_00001839  | XLOC_001224    |                                                           |  |                 | -0,591718815 |
| A_19_P00316743 | NR_027103       | LOC285375      | uncharacterized LOC285375                                 |  | ENST00000419618 | -0,591936286 |
| A_24_P362881   | NM_018010       | IFT57          | intraflagellar transport 57 homolog (Chlamydomonas)       |  | ENST00000264538 | -0,592303758 |
| A_21_P0006451  | ENST00000433646 | XLOC_008171    |                                                           |  | ENST00000433646 | -0,592546294 |
| A_21_P0002834  | ENST00000420000 | XLOC_003020    |                                                           |  | ENST00000420000 | -0,592730155 |
| A_21_P0004586  | TCONS_00011095  | XLOC_005088    |                                                           |  |                 | -0,592917652 |
| A_21_P0004877  | TCONS_00011802  | XLOC_005278    |                                                           |  |                 | -0,593180854 |
| A_21_P0003781  | TCONS_00008605  | XLOC_004111    |                                                           |  |                 | -0,593262137 |
| A_23_P83498    | NM_006546       | IGF2BP1        | insulin-like growth factor 2 mRNA binding protein 1       |  | ENST00000290341 | -0,593553341 |
| A_24_P238250   | NM_002307       | LGALS7         | lectin, galactoside-binding, soluble, 7                   |  | ENST00000314980 | -0,593625241 |
| A_21_P0000450  | NR_003340       | SNORD116-26    | small nucleolar RNA, C/D box 116-26                       |  |                 | -0,59363306  |
| A_21_P0013985  | XM_003119694    | LOC100507494   | uncharacterized LOC100507494                              |  |                 | -0,594163066 |
| A_21_P0003649  | TCONS_00008218  | XLOC_003680    |                                                           |  |                 | -0,594169781 |
| A_23_P416821   | NM_152774       | TMEM196        | transmembrane protein 196                                 |  | ENST00000433641 | -0,59430998  |
| A_24_P94402    | NM_005378       | MYCN           | v-myc myelocytomatosis viral related oncogene, neuroblast |  | ENST00000281043 | -0,594472727 |
| A_24_P257511   | NM_001713       | BHMT           | betaine--homocysteine S-methyltransferase                 |  | ENST00000436224 | -0,595246982 |
| A_21_P0010375  | ENST00000440255 | XLOC_014333    |                                                           |  | ENST00000440255 | -0,595420647 |
| A_33_P3463924  | AF264626        | LOC57399       | uncharacterized gastric protein ZA52P                     |  |                 | -0,59555956  |
| A_21_P0000138  | NM_001197238    | BTN2A2         | butyrophilin, subfamily 2, member A2                      |  | ENST00000469230 | -0,596091232 |
| A_21_P0010792  | ENST00000438371 | XLOC_I2_001382 |                                                           |  | ENST00000438371 | -0,596496436 |
| A_33_P3416612  | NR_024100       | LINC00323      | long intergenic non-protein coding RNA 323                |  | ENST00000441268 | -0,5967476   |
| A_23_P66881    | NM_003835       | RGS9           | regulator of G-protein signaling 9                        |  | ENST00000262406 | -0,59688681  |
| A_21_P0011459  | BC036249        | XLOC_I2_005418 |                                                           |  |                 | -0,597104395 |
| A_21_P0005185  | TCONS_00012833  | XLOC_005939    |                                                           |  |                 | -0,597569123 |
| A_23_P358410   | NM_014850       | SRGAP3         | SLIT-ROBO Rho GTPase activating protein 3                 |  | ENST00000360413 | -0,597569389 |

|                |                 |                |                                                              |                 |              |
|----------------|-----------------|----------------|--------------------------------------------------------------|-----------------|--------------|
| A_23_P355447   | NM_174976       | ZDHC22         | zinc finger, DHHC-type containing 22                         | ENST00000319374 | -0,597687348 |
| A_23_P110624   | NM_001332       | CTNND2         | catenin (cadherin-associated protein), delta 2 (neural plako | ENST00000538638 | -0,597969826 |
| A_21_P0000903  | NR_040111       | LOC100505782   | uncharacterized LOC100505782                                 | ENST00000430006 | -0,598957185 |
| A_33_P3228902  | AK125136        | LOC100133306   | uncharacterized LOC100133306                                 |                 | -0,600432122 |
| A_33_P3325665  | BC109228        | JPH4           | junctophilin 4                                               |                 | -0,600511785 |
| A_21_P0013711  | ENST00000443993 | XLOC_l2_015038 |                                                              | ENST00000443993 | -0,600913134 |
| A_21_P0010011  | TCONS_00028329  | XLOC_013680    |                                                              |                 | -0,601784607 |
| A_24_P944964   | NM_004488       | GP5            | glycoprotein V (platelet)                                    | ENST00000401815 | -0,602943381 |
| A_23_P110266   | NM_024574       | NDNF           | neuron-derived neurotrophic factor                           | ENST00000379692 | -0,603225435 |
| A_21_P0003105  | TCONS_00006452  | XLOC_003062    |                                                              |                 | -0,603497843 |
| A_21_P0000939  | XR_109346       | LOC100505909   | uncharacterized LOC100505909                                 | ENST00000522481 | -0,603586644 |
| A_23_P59613    | NM_003508       | FZD9           | frizzled family receptor 9                                   | ENST00000344575 | -0,603808468 |
| A_23_P211039   | NM_006988       | ADAMTS1        | ADAM metallopeptidase with thrombospondin type 1 motif       | ENST00000464589 | -0,604441866 |
| A_21_P0005175  | TCONS_00012773  | XLOC_005808    |                                                              |                 | -0,604704056 |
| A_21_P0006700  | ENST00000424701 | XLOC_008603    |                                                              | ENST00000424701 | -0,604879911 |
| A_19_P00318559 | CQ819097        | XLOC_004323    |                                                              |                 | -0,604939923 |
| A_23_P111517   | NM_022479       | WBSCR17        | Williams-Beuren syndrome chromosome region 17                | ENST00000467723 | -0,605215695 |
| A_33_P3414187  | NM_054030       | MRGPRX2        | MAS-related GPR, member X2                                   | ENST00000329773 | -0,605335619 |
| A_23_P115780   | NM_015613       | LRIT1          | leucine-rich repeat, immunoglobulin-like and transmembral    | ENST00000372105 | -0,605635622 |
| A_33_P3301915  | NM_201286       | USP51          | ubiquitin specific peptidase 51                              | ENST00000500968 | -0,606096053 |
| A_23_P420236   | NM_203487       | PCDH9          | protocadherin 9                                              | ENST00000456367 | -0,606326061 |
| A_21_P0007416  | TCONS_00019792  | XLOC_009592    |                                                              |                 | -0,606382598 |
| A_33_P3284045  | NM_199347       | NEK10          | NIMA (never in mitosis gene a)- related kinase 10            | ENST00000341435 | -0,606421514 |
| A_21_P0003976  | ENST00000504998 | XLOC_004309    |                                                              | ENST00000504998 | -0,60662932  |
| A_33_P3356004  | NR_027287       | UCKL1-AS1      | UCKL1 antisense RNA 1 (non-protein coding)                   |                 | -0,607175417 |
| A_33_P3239579  | NR_034014       | LOC100131060   | uncharacterized LOC100131060                                 |                 | -0,607626537 |
| A_24_P42624    | NM_003728       | UNC5C          | unc-5 homolog C (C. elegans)                                 | ENST00000331502 | -0,607933141 |
| A_33_P3240757  | NM_001542       | IGSF3          | immunoglobulin superfamily, member 3                         | ENST00000318837 | -0,608370557 |
| A_23_P114445   | NM_020932       | MAGEE1         | melanoma antigen family E, 1                                 | ENST00000361470 | -0,608427456 |

|               |                 |              |                                                        |                 |              |
|---------------|-----------------|--------------|--------------------------------------------------------|-----------------|--------------|
| A_23_P111662  | NM_178559       | ABCB5        | ATP-binding cassette, sub-family B (MDR/TAP), member 5 | ENST00000258738 | -0,6086887   |
| A_21_P0007620 | TCONS_00020550  | XLOC_009863  |                                                        |                 | -0,608785489 |
| A_21_P0003495 | ENST00000416680 | XLOC_004051  |                                                        | ENST00000416680 | -0,6092543   |
| A_21_P0004867 | TCONS_00011755  | XLOC_005217  |                                                        |                 | -0,609335639 |
| A_23_P135742  | NR_027693       | C1orf170     | chromosome 1 open reading frame 170                    | ENST00000479361 | -0,609363479 |
| A_21_P0003351 | ENST00000503465 | XLOC_003509  |                                                        | ENST00000503465 | -0,609667871 |
| A_21_P0000520 | NR_027081       | LOC100271831 | uncharacterized LOC100271831                           |                 | -0,609885735 |
| A_33_P3365646 | AK126077        | LOC100128437 | uncharacterized LOC100128437                           |                 | -0,609906914 |
| A_21_P0009183 | ENST00000442532 | XLOC_012338  |                                                        | ENST00000442532 | -0,609930807 |
| A_23_P102864  | NM_002772       | TMPRSS15     | transmembrane protease, serine 15                      | ENST00000284885 | -0,609997692 |
| A_21_P0005660 | THC2736788      | XLOC_006723  |                                                        |                 | -0,61018751  |
| A_23_P427122  | NM_053017       | ART5         | ADP-ribosyltransferase 5                               | ENST00000359918 | -0,610227863 |
| A_33_P3412658 | NR_045118       | LOC100289509 | uncharacterized LOC100289509                           |                 | -0,610310842 |
| A_23_P250302  | NM_001837       | CCR3         | chemokine (C-C motif) receptor 3                       | ENST00000357422 | -0,610411008 |
| A_33_P3368388 | NM_178452       | DNAAF1       | dynein, axonemal, assembly factor 1                    | ENST00000334315 | -0,61041244  |
| A_23_P28224   | NM_006920       | SCN1A        | sodium channel, voltage-gated, type I, alpha subunit   | ENST00000303395 | -0,610912718 |
| A_23_P104972  | NM_023945       | MS4A5        | membrane-spanning 4-domains, subfamily A, member 5     | ENST00000300190 | -0,611500857 |
| A_23_P37167   | NM_002471       | MYH6         | myosin, heavy chain 6, cardiac muscle, alpha           | ENST00000356287 | -0,611811424 |
| A_33_P3248004 | XR_109047       | FLJ41423     | uncharacterized LOC399886                              |                 | -0,612165337 |
| A_23_P83498   | NM_006546       | IGF2BP1      | insulin-like growth factor 2 mRNA binding protein 1    | ENST00000290341 | -0,612462683 |
| A_21_P0006961 | TCONS_00018421  | XLOC_008710  |                                                        |                 | -0,612551769 |
| A_21_P0014872 | XR_132769       | LOC100505923 | uncharacterized LOC100505923                           |                 | -0,612587839 |
| A_23_P331235  | NM_178569       | C5orf38      | chromosome 5 open reading frame 38                     | ENST00000334000 | -0,612606257 |
| A_33_P3378051 | NM_178123       | SESTD1       | SEC14 and spectrin domains 1                           |                 | -0,613503327 |
| A_33_P3279600 | NM_000145       | FSHR         | follicle stimulating hormone receptor                  | ENST00000406846 | -0,613514159 |
| A_23_P360079  | NM_207363       | NCKAP5       | NCK-associated protein 5                               | ENST00000537661 | -0,613523095 |
| A_23_P110266  | NM_024574       | NDNF         | neuron-derived neurotrophic factor                     | ENST00000379692 | -0,613564773 |
| A_21_P0009999 | TCONS_00028299  | XLOC_013639  |                                                        |                 | -0,613827027 |
| A_33_P3400903 | NR_002227       | DISC2        | disrupted in schizophrenia 2 (non-protein coding)      |                 | -0,614011199 |



|               |                 |                |                                                         |                 |              |
|---------------|-----------------|----------------|---------------------------------------------------------|-----------------|--------------|
| A_24_P124370  | NM_018222       | PARVA          | parvin, alpha                                           | ENST00000550549 | -0,614074139 |
| A_21_P0010339 | DB069106        | XLOC_014137    |                                                         |                 | -0,614080913 |
| A_23_P120243  | NM_024501       | HOXD1          | homeobox D1                                             | ENST00000375170 | -0,614134719 |
| A_23_P101084  | NM_032598       | SPATA22        | spermatogenesis associated 22                           | ENST00000541913 | -0,614714165 |
| A_33_P3815935 | BG220668        | TMEM50B        | transmembrane protein 50B                               |                 | -0,615499864 |
| A_21_P0006225 | TCONS_00016155  | XLOC_007562    |                                                         |                 | -0,616143146 |
| A_23_P78353   | NM_005925       | MEP1B          | mepirin A, beta                                         | ENST00000269202 | -0,616438927 |
| A_23_P74828   | NM_030772       | GJA9           | gap junction protein, alpha 9, 59kDa                    | ENST00000360786 | -0,616524042 |
| A_23_P121545  | NM_201591       | GPM6A          | glycoprotein M6A                                        | ENST00000280187 | -0,617122935 |
| A_21_P0003558 | TCONS_00007955  | XLOC_003422    |                                                         |                 | -0,617536029 |
| A_33_P3237669 | NM_144688       | CCDC155        | coiled-coil domain containing 155                       | ENST00000447857 | -0,617728333 |
| A_33_P3238484 | NM_014974       | DIP2C          | DIP2 disco-interacting protein 2 homolog C (Drosophila) | ENST00000381496 | -0,617796798 |
| A_32_P232214  | NM_001194986    | LOC388630      | UPF0632 protein A                                       | ENST00000371865 | -0,61797249  |
| A_33_P3423504 | ENST00000329538 | MAGEB17        | melanoma antigen family B, 17                           | ENST00000329538 | -0,618411807 |
| A_23_P114445  | NM_020932       | MAGEE1         | melanoma antigen family E, 1                            | ENST00000361470 | -0,618750229 |
| A_33_P3320643 | NR_026555       | GDEP           | gene differentially expressed in prostate               | ENST00000504263 | -0,618812318 |
| A_33_P3269636 | NM_001166034    | SBSN           | suprabasin                                              | ENST00000518157 | -0,619503853 |
| A_23_P61778   | NM_022463       | NXN            | nucleoredoxin                                           | ENST00000336868 | -0,620457054 |
| A_21_P0011567 | ENST00000440522 | XLOC_l2_005988 |                                                         | ENST00000440522 | -0,620621704 |
| A_23_P369237  | NM_004797       | ADIPOQ         | adiponectin, C1Q and collagen domain containing         | ENST00000412955 | -0,620840068 |
| A_21_P0010102 | TCONS_00028595  | XLOC_013614    |                                                         |                 | -0,621069196 |
| A_33_P3289123 | NM_033403       | DCLK3          | doublecortin-like kinase 3                              | ENST00000416516 | -0,621662938 |
| A_24_P732099  | NR_001589       | HBBP1          | hemoglobin, beta pseudogene 1                           | ENST00000454892 | -0,622034212 |
| A_32_P114746  | NM_182581       | C1orf111       | chromosome 1 open reading frame 111                     | ENST00000367935 | -0,622264556 |
| A_23_P110052  | NM_023067       | FOXL2          | forkhead box L2                                         | ENST00000542203 | -0,62249658  |
| A_23_P113553  | NM_001011544    | MAGEA11        | melanoma antigen family A, 11                           | ENST00000355220 | -0,622654019 |
| A_21_P0004120 | ENST00000507251 | XLOC_004773    |                                                         | ENST00000507251 | -0,622747674 |
| A_23_P70213   | NM_000038       | APC            | adenomatous polyposis coli                              | ENST00000508376 | -0,622977878 |
| A_21_P0007842 | ENST00000549993 | XLOC_009813    |                                                         | ENST00000549993 | -0,623137383 |

|               |                  |                |                                                                         |                 |              |
|---------------|------------------|----------------|-------------------------------------------------------------------------|-----------------|--------------|
| A_32_P160563  | NM_001012393     | OPCML          | opioid binding protein/cell adhesion molecule-like                      | ENST00000524381 | -0,623395597 |
| A_23_P59654   | NM_022150        | NPVF           | neuropeptide VF precursor                                               | ENST00000222674 | -0,623610343 |
| A_21_P0011662 | BC035184         | LOC647946      | uncharacterized LOC647946                                               |                 | -0,623982599 |
| A_33_P3870906 | NR_038320        | LOC100507634   | uncharacterized LOC100507634                                            |                 | -0,625794468 |
| A_23_P11800   | NM_018584        | CAMK2N1        | calcium/calmodulin-dependent protein kinase II inhibitor 1              | ENST00000375078 | -0,625972683 |
| A_24_P128163  | ENST00000367995  | ADAMTS4        | ADAM metallopeptidase with thrombospondin type 1 motif                  | ENST00000367995 | -0,626437256 |
| A_21_P0003518 | ENST00000514347  | XLOC_004102    |                                                                         | ENST00000514347 | -0,627240744 |
| A_23_P104972  | NM_023945        | MS4A5          | membrane-spanning 4-domains, subfamily A, member 5                      | ENST00000300190 | -0,627527908 |
| A_33_P3268892 | NM_001190468     | GDNF           | glial cell derived neurotrophic factor                                  | ENST00000326524 | -0,627545673 |
| A_21_P0007874 | ENST00000552634  | XLOC_010061    |                                                                         | ENST00000552634 | -0,627548484 |
| A_23_P153986  | NM_002239        | KCNJ3          | potassium inwardly-rectifying channel, subfamily J, member              | ENST00000295101 | -0,627640109 |
| A_33_P3261520 | ENST00000508366  | ATP6AP1L       | ATPase, H <sup>+</sup> transporting, lysosomal accessory protein 1-like | ENST00000508366 | -0,627902794 |
| A_24_P281439  | NM_001004697     | OR2T5          | olfactory receptor, family 2, subfamily T, member 5                     | ENST00000328570 | -0,628214921 |
| A_23_P103349  | NM_022375        | OCLM           | oculomedin                                                              |                 | -0,628602824 |
| A_21_P0011646 | NR_033876        | LINC00511      | long intergenic non-protein coding RNA 511                              |                 | -0,628606039 |
| A_21_P0011701 | TCONS_I2_0001261 | XLOC_I2_006780 |                                                                         |                 | -0,628795586 |
| A_21_P0001275 | TCONS_00000873   | XLOC_000111    |                                                                         |                 | -0,62892529  |
| A_23_P114445  | NM_020932        | MAGEE1         | melanoma antigen family E, 1                                            | ENST00000361470 | -0,629487251 |
| A_23_P388331  | NM_001187        | BAGE           | B melanoma antigen                                                      |                 | -0,629648348 |
| A_24_P369656  | NM_052978        | TRIM9          | tripartite motif containing 9                                           | ENST00000360392 | -0,629717729 |
| A_23_P101084  | NM_032598        | SPATA22        | spermatogenesis associated 22                                           | ENST00000541913 | -0,630392657 |
| A_23_P57248   | NM_001145350     | C20orf173      | chromosome 20 open reading frame 173                                    | ENST00000246199 | -0,632079462 |
| A_23_P324813  | NM_181844        | BCL6B          | B-cell CLL/lymphoma 6, member B                                         | ENST00000293805 | -0,632115617 |
| A_24_P397903  | NM_016010        | FAM164A        | family with sequence similarity 164, member A                           |                 | -0,63221221  |
| A_24_P690811  | NM_001024656     | ASPDH          | aspartate dehydrogenase domain containing                               | ENST00000376916 | -0,632487249 |
| A_24_P355626  | NM_022169        | ABCG4          | ATP-binding cassette, sub-family G (WHITE), member 4                    | ENST00000307417 | -0,632500966 |
| A_21_P0002116 | ENST00000421624  | XLOC_002356    |                                                                         | ENST00000421624 | -0,632515612 |
| A_21_P0004949 | ENST00000456896  | XLOC_005485    |                                                                         | ENST00000456896 | -0,633258697 |
| A_23_P116640  | NM_033180        | OR51B2         | olfactory receptor, family 51, subfamily B, member 2                    | ENST00000328813 | -0,633436686 |

|               |                 |              |                                                            |                 |              |
|---------------|-----------------|--------------|------------------------------------------------------------|-----------------|--------------|
| A_33_P3237854 | NR_027012       | LINC00293    | long intergenic non-protein coding RNA 293                 |                 | -0,633738806 |
| A_24_P224966  | NM_000085       | CLCNKB       | chloride channel Kb                                        | ENST00000331579 | -0,633896935 |
| A_23_P114445  | NM_020932       | MAGEE1       | melanoma antigen family E, 1                               | ENST00000361470 | -0,634098878 |
| A_33_P3320832 | NM_001011717    | NMS          | neuromedin S                                               | ENST00000376865 | -0,634355649 |
| A_21_P0006763 | ENST00000444155 | XLOC_008826  |                                                            | ENST00000444155 | -0,634912012 |
| A_33_P3389713 | NM_001004730    | OR5AR1       | olfactory receptor, family 5, subfamily AR, member 1       | ENST00000302969 | -0,635368729 |
| A_24_P170726  | AK094407        | LOC645427    | uncharacterized LOC645427                                  |                 | -0,636207479 |
| A_33_P3367889 | AK126078        | LOC100130657 | uncharacterized LOC100130657                               |                 | -0,636243045 |
| A_21_P0009922 | ENST00000420710 | XLOC_013828  |                                                            | ENST00000420710 | -0,636544199 |
| A_24_P65121   | NM_001040655    | TTC23        | tetratricopeptide repeat domain 23                         | ENST00000394130 | -0,636725032 |
| A_33_P3236628 | ENST00000378196 | BCKDHA       | branched chain keto acid dehydrogenase E1, alpha polypep   | ENST00000378196 | -0,637156694 |
| A_32_P701268  | NM_053002       | MED12L       | mediator complex subunit 12-like                           | ENST00000474524 | -0,637339871 |
| A_33_P3229467 | NM_004760       | STK17A       | serine/threonine kinase 17a                                |                 | -0,637436714 |
| A_33_P3337318 | ENST00000490912 | HNRNPA2B1    | heterogeneous nuclear ribonucleoprotein A2/B1              | ENST00000490912 | -0,638286789 |
| A_21_P0010292 | TCONS_00029165  | XLOC_014105  |                                                            |                 | -0,638654341 |
| A_21_P0010692 | NR_027504       | MST1P2       | macrophage stimulating 1 (hepatocyte growth factor-like) p | ENST00000492370 | -0,639157738 |
| A_23_P83498   | NM_006546       | IGF2BP1      | insulin-like growth factor 2 mRNA binding protein 1        | ENST00000290341 | -0,639310864 |
| A_33_P3407529 | NM_001174164    | PRRT4        | proline-rich transmembrane protein 4                       | ENST00000446477 | -0,639897566 |
| A_21_P0006117 | TCONS_00015901  | XLOC_007262  |                                                            |                 | -0,640125237 |
| A_23_P113553  | NM_001011544    | MAGEA11      | melanoma antigen family A, 11                              | ENST00000355220 | -0,640544684 |
| A_33_P3329088 | NM_002773       | PRSS8        | protease, serine, 8                                        | ENST00000317508 | -0,642106389 |
| A_21_P0009226 | TCONS_00025320  | XLOC_012126  |                                                            |                 | -0,642461065 |
| A_21_P0004353 | XR_108581       | LOC100506858 | uncharacterized LOC100506858                               |                 | -0,642575877 |
| A_21_P0008260 | DA144211        | XLOC_010670  |                                                            |                 | -0,642721652 |
| A_23_P114445  | NM_020932       | MAGEE1       | melanoma antigen family E, 1                               | ENST00000361470 | -0,642742548 |
| A_24_P333697  | NM_015596       | KLK13        | kallikrein-related peptidase 13                            | ENST00000376799 | -0,642800038 |
| A_33_P3272399 | AK094407        | LOC645427    | uncharacterized LOC645427                                  |                 | -0,643229721 |
| A_33_P3386237 | XR_109319       | LOC100132529 | uncharacterized LOC100132529                               |                 | -0,643556876 |
| A_23_P167121  | NM_000807       | GABRA2       | gamma-aminobutyric acid (GABA) A receptor, alpha 2         | ENST00000510233 | -0,643630178 |

|                |                  |                |                                                                               |  |                 |              |
|----------------|------------------|----------------|-------------------------------------------------------------------------------|--|-----------------|--------------|
| A_21_P0004884  | TCONS_00011819   | XLOC_005302    |                                                                               |  |                 | -0,643883704 |
| A_33_P3286873  | ENST00000483825  | CD247          | CD247 molecule                                                                |  | ENST00000483825 | -0,644315476 |
| A_21_P0006890  | TCONS_00018268   | XLOC_008549    |                                                                               |  |                 | -0,644626057 |
| A_21_P0006600  | TCONS_00017630   | XLOC_008282    |                                                                               |  |                 | -0,644797845 |
| A_23_P46879    | NM_000936        | PNLIP          | pancreatic lipase                                                             |  | ENST00000369221 | -0,644979309 |
| A_21_P0010027  | TCONS_00028351   | XLOC_013702    |                                                                               |  |                 | -0,645141233 |
| A_19_P00319534 | NR_022008        | PAR5           |                                                                               |  |                 | -0,645738337 |
| A_33_P3390723  | ENST00000377055  | TMEM2          | transmembrane protein 2                                                       |  | ENST00000377055 | -0,645779032 |
| A_33_P3317628  | NM_007183        | PKP3           | plakophilin 3                                                                 |  | ENST00000331563 | -0,645995695 |
| A_21_P0001306  | TCONS_00000956   | XLOC_000214    |                                                                               |  |                 | -0,646056539 |
| A_21_P0007052  | NR_026794        | LOC731789      | uncharacterized LOC731789                                                     |  |                 | -0,646375798 |
| A_33_P3263212  | NM_020794        | LRRC7          | leucine rich repeat containing 7                                              |  | ENST00000310961 | -0,646637758 |
| A_21_P0014340  | XR_109346        | LOC100505909   | uncharacterized LOC100505909                                                  |  |                 | -0,647112163 |
| A_23_P153183   | NM_001168648     | CNKS2          | connector enhancer of kinase suppressor of Ras 2                              |  | ENST00000279451 | -0,647344138 |
| A_21_P0009762  | TCONS_00027298   | XLOC_013298    |                                                                               |  |                 | -0,647455006 |
| A_23_P2616     | NM_130441        | CLEC4C         | C-type lectin domain family 4, member C                                       |  | ENST00000360345 | -0,647662638 |
| A_21_P0007781  | TCONS_00020971   | XLOC_010241    |                                                                               |  |                 | -0,648169848 |
| A_23_P380871   | NM_001040703     | DEFB105B       | defensin, beta 105B                                                           |  | ENST00000335510 | -0,648605977 |
| A_33_P3332150  | NM_203454        | APOBEC4        | apolipoprotein B mRNA editing enzyme, catalytic polypeptide-like 4 (putative) |  |                 | -0,648731148 |
| A_21_P0003678  | TCONS_00008328   | XLOC_003782    |                                                                               |  |                 | -0,648853947 |
| A_21_P0009466  | DB516369         | XLOC_012642    |                                                                               |  |                 | -0,649788348 |
| A_21_P0009452  | TCONS_00026275   | XLOC_012622    |                                                                               |  |                 | -0,650303499 |
| A_33_P3315719  | NM_172069        | PLEKHH2        | pleckstrin homology domain containing, family H (with MyT                     |  | ENST00000405000 | -0,651113529 |
| A_23_P110266   | NM_024574        | NDNF           | neuron-derived neurotrophic factor                                            |  | ENST00000379692 | -0,651126324 |
| A_21_P0010584  | TCONS_I2_0000092 | XLOC_I2_000696 |                                                                               |  |                 | -0,65142453  |
| A_33_P3420224  | NM_001033113     | ENTPD8         | ectonucleoside triphosphate diphosphohydrolase 8                              |  | ENST00000461823 | -0,652103794 |
| A_23_P369237   | NM_004797        | ADIPOQ         | adiponectin, C1Q and collagen domain containing                               |  | ENST00000412955 | -0,6522023   |
| A_23_P369237   | NM_004797        | ADIPOQ         | adiponectin, C1Q and collagen domain containing                               |  | ENST00000412955 | -0,654975405 |
| A_19_P00319276 | TCONS_00028710   | XLOC_013812    |                                                                               |  |                 | -0,655252326 |

|               |                  |                |                                               |                 |              |
|---------------|------------------|----------------|-----------------------------------------------|-----------------|--------------|
| A_33_P3249449 | NM_001013407     | PRAMEF5        | PRAME family member 5                         | ENST00000376168 | -0,655269396 |
| A_23_P92536   | NM_000087        | CNGA1          | cyclic nucleotide gated channel alpha 1       | ENST00000420489 | -0,655404745 |
| A_24_P162273  | NR_024507        | TTL            | tubulin tyrosine ligase                       |                 | -0,655948726 |
| A_23_P101319  | NM_152354        | ZNF285         | zinc finger protein 285                       | ENST00000544719 | -0,656909291 |
| A_21_P0012091 | ENST00000438056  | XLOC_I2_008261 |                                               | ENST00000438056 | -0,657103842 |
| A_33_P3249072 | ENST00000370642  | HOGA1          | 4-hydroxy-2-oxoglutarate aldolase 1           | ENST00000370642 | -0,65754208  |
| A_23_P39454   | NM_024967        | ZNF556         | zinc finger protein 556                       | ENST00000307635 | -0,657714243 |
| A_23_P114983  | NM_032588        | TRIM63         | tripartite motif containing 63                | ENST00000374272 | -0,657791975 |
| A_33_P3341841 | NM_001004312     | RTP2           | receptor (chemosensory) transporter protein 2 | ENST00000358241 | -0,658008279 |
| A_21_P0012359 | ENST00000423311  | XLOC_I2_009539 |                                               | ENST00000423311 | -0,658582963 |
| A_24_P260443  | NM_003248        | THBS4          | thrombospondin 4                              | ENST00000511888 | -0,658640994 |
| A_23_P114445  | NM_020932        | MAGEE1         | melanoma antigen family E, 1                  | ENST00000361470 | -0,658785001 |
| A_21_P0007777 | TCONS_00020966   | XLOC_010235    |                                               |                 | -0,659302072 |
| A_21_P0000733 | NR_038239        | LOC100507629   | uncharacterized LOC100507629                  | ENST00000420529 | -0,659748672 |
| A_33_P3397955 | NR_002808        | ITPK1-AS1      | ITPK1 antisense RNA 1 (non-protein coding)    | ENST00000553639 | -0,659758259 |
| A_23_P393051  | NM_152365        | C1orf172       | chromosome 1 open reading frame 172           | ENST00000374109 | -0,65982779  |
| A_21_P0012130 | TCONS_I2_0001636 | XLOC_I2_008692 |                                               |                 | -0,660001491 |
| A_21_P0011716 | TCONS_I2_0001271 | XLOC_I2_006832 |                                               |                 | -0,660234488 |
| A_21_P0006684 | ENST00000415746  | XLOC_008508    |                                               | ENST00000415746 | -0,660539127 |
| A_21_P0005892 | TCONS_00015147   | XLOC_007190    |                                               |                 | -0,660645632 |
| A_33_P3373308 | NR_036683        | LOC440700      | carbonic anhydrase XIV (CA14) pseudogene      | ENST00000400982 | -0,661701973 |
| A_21_P0004027 | ENST00000503691  | XLOC_004464    |                                               | ENST00000503691 | -0,661924078 |
| A_33_P3217357 | XR_110140        | LOC100132501   | uncharacterized LOC100132501                  |                 | -0,661932993 |
| A_23_P151232  | NM_001136103     | TMEM132C       | transmembrane protein 132C                    | ENST00000435159 | -0,662644304 |
| A_21_P0012772 | ENST00000514877  | XLOC_I2_011095 |                                               | ENST00000514877 | -0,662831593 |
| A_21_P0007583 | TCONS_00020475   | XLOC_009808    |                                               |                 | -0,66340235  |
| A_23_P114983  | NM_032588        | TRIM63         | tripartite motif containing 63                | ENST00000374272 | -0,664096068 |
| A_33_P3330443 | NM_147189        | FAM110B        | family with sequence similarity 110, member B |                 | -0,665582988 |
| A_21_P0004607 | AK093403         | XLOC_005570    |                                               |                 | -0,665634172 |



|                |                  |                |                                                                 |                 |               |
|----------------|------------------|----------------|-----------------------------------------------------------------|-----------------|---------------|
| A_23_P1352     | NM_003015        | SFRP5          | secreted frizzled-related protein 5                             | ENST00000266066 | -0,666365346  |
| A_33_P3320077  | ENST00000380924  | NFIB           | nuclear factor I/B                                              | ENST00000380924 | -0,666497763  |
| A_33_P3286980  | NM_001105662     | USP17          | ubiquitin specific peptidase 17                                 | ENST00000421288 | -0,666623957  |
| A_33_P3221723  | NM_013244        | MGAT4C         | mannosyl (alpha-1,3-)-glycoprotein beta-1,4-N-acetylglucos      | ENST00000547225 | -0,667031402  |
| A_33_P3350858  | XM_003403456     | LOC100652857   | transmembrane and coiled-coil domain-containing protein 5B-like |                 | -0,667479732  |
| A_23_P107116   | NM_007148        | RNF112         | ring finger protein 112                                         |                 | -0,668175518  |
| A_21_P0008009  | THC2516791       | XLOC_010683    |                                                                 |                 | -0,668192814  |
| A_21_P0002121  | ENST00000440016  | XLOC_002403    |                                                                 | ENST00000440016 | -0,668331678  |
| A_21_P0004788  | ENST00000417838  | XLOC_005870    |                                                                 | ENST00000417838 | -0,668344158  |
| A_32_P52519    | NM_170664        | OTOA           | otoancorin                                                      | ENST00000550753 | -0,668385792  |
| A_33_P3416787  | XR_132931        | LOC100653080   | zinc finger protein 182-like                                    |                 | -0,669114071  |
| A_21_P0003576  | TCONS_00007997   | XLOC_003460    |                                                                 |                 | -0,669142294  |
| A_21_P0002332  | TCONS_00003973   | XLOC_001787    |                                                                 |                 | -0,669486489  |
| A_21_P0013710  | TCONS_I2_0002986 | XLOC_I2_015037 |                                                                 |                 | -0,669589952  |
| A_33_P3369920  | AK124574         | LOC100128402   | uncharacterized LOC100128402                                    |                 | -0,670116751  |
| A_23_P100189   | NM_002761        | PRM1           | protamine 1                                                     | ENST00000312511 | -0,6711110032 |
| A_21_P0014031  | NM_001123066     | MAPT           | microtubule-associated protein tau                              | ENST00000354326 | -0,671292603  |
| A_23_P102864   | NM_002772        | TMPRSS15       | transmembrane protease, serine 15                               | ENST00000284885 | -0,671422974  |
| A_23_P405878   | NM_152319        | C12orf54       | chromosome 12 open reading frame 54                             | ENST00000380491 | -0,67144022   |
| A_19_P00316035 | TCONS_I2_0001243 | XLOC_I2_006675 |                                                                 |                 | -0,671600409  |
| A_33_P3550894  | NM_001145661     | GATA2          | GATA binding protein 2                                          | ENST00000430265 | -0,671646947  |
| A_21_P0010560  | TCONS_I2_0000059 | XLOC_I2_000423 |                                                                 |                 | -0,672200958  |
| A_21_P0000704  | NR_037897        | FLJ38109       | uncharacterized LOC386627                                       |                 | -0,672419425  |
| A_33_P3282075  | NM_199262        | SP6            | Sp6 transcription factor                                        | ENST00000536300 | -0,672445763  |
| A_33_P3260563  | NM_007017        | SOX30          | SRY (sex determining region Y)-box 30                           | ENST00000311371 | -0,672672614  |
| A_33_P3333342  | AK128409         | FLJ46552       | FLJ46552 protein                                                |                 | -0,672714871  |
| A_23_P407654   | NM_173564        | C7orf51        | chromosome 7 open reading frame 51                              | ENST00000423930 | -0,673194183  |
| A_21_P0007483  | ENST00000539019  | SSPN           | sarcospan (Kras oncogene-associated gene)                       | ENST00000539019 | -0,674217666  |
| A_21_P0010279  | TCONS_00029125   | XLOC_014072    |                                                                 |                 | -0,674297343  |

|                |                  |                |                                                                                |                 |              |
|----------------|------------------|----------------|--------------------------------------------------------------------------------|-----------------|--------------|
| A_33_P3284345  | NM_004495        | NRG1           | neuregulin 1                                                                   | ENST00000522569 | -0,674419251 |
| A_24_P235338   | NM_007332        | TRPA1          | transient receptor potential cation channel, subfamily A, m                    | ENST00000262209 | -0,674778815 |
| A_21_P0010634  | TCONS_I2_0000139 | XLOC_I2_001011 |                                                                                |                 | -0,67491366  |
| A_21_P0014854  | XR_132737        | LOC100652889   | uncharacterized LOC100652889                                                   |                 | -0,676084466 |
| A_21_P0010524  | TCONS_I2_0000017 | XLOC_I2_000116 |                                                                                |                 | -0,677181831 |
| A_21_P0012324  | ENST00000444848  | XLOC_I2_009363 |                                                                                | ENST00000444848 | -0,677207638 |
| A_21_P0002523  | TCONS_00004502   | XLOC_002401    |                                                                                |                 | -0,677281036 |
| A_21_P0013545  | DA808148         | XLOC_I2_014686 |                                                                                |                 | -0,677474692 |
| A_23_P11070    | NM_032553        | GPR174         | G protein-coupled receptor 174                                                 | ENST00000276077 | -0,677521373 |
| A_19_P00322655 | NR_036444        | LOC400550      | uncharacterized LOC400550                                                      |                 | -0,677811051 |
| A_19_P00322397 | NR_036444        | LOC400550      | uncharacterized LOC400550                                                      |                 | -0,678561989 |
| A_21_P0004437  | THC2720758       | XLOC_004982    |                                                                                |                 | -0,678903946 |
| A_23_P110052   | NM_023067        | FOXL2          | forkhead box L2                                                                | ENST00000542203 | -0,678933173 |
| A_23_P127418   | NM_005959        | MTNR1B         | melatonin receptor 1B                                                          | ENST00000257068 | -0,679532744 |
| A_23_P161331   | NM_033056        | PCDH15         | protocadherin-related 15                                                       | ENST00000417177 | -0,680528612 |
| A_19_P00319213 | ENST00000557155  | XLOC_010889    |                                                                                | ENST00000557155 | -0,681761761 |
| A_23_P107116   | NM_007148        | RNF112         | ring finger protein 112                                                        |                 | -0,682168767 |
| A_32_P94160    | NM_006252        | PRKAA2         | protein kinase, AMP-activated, alpha 2 catalytic subunit                       | ENST00000371244 | -0,68263309  |
| A_21_P0006170  | TCONS_00016042   | XLOC_007438    |                                                                                |                 | -0,682677232 |
| A_21_P0002429  | TCONS_00004223   | XLOC_002066    |                                                                                |                 | -0,682720902 |
| A_23_P388220   | NM_173848        | RALYL          | RALY RNA binding protein-like                                                  | ENST00000521268 | -0,68315141  |
| A_33_P3229678  | XM_003119812     | LOC100509378   | uncharacterized LOC100509378                                                   |                 | -0,683155402 |
| A_23_P423237   | NM_000231        | SGCG           | sarcoglycan, gamma (35kDa dystrophin-associated glycoprc                       | ENST00000537476 | -0,683378465 |
| A_33_P3258607  | NM_001004352     | LOC100506422   | putative deoxyridine 5'-triphosphate nucleotidohydrolase-like protein FLJ16323 |                 | -0,683837539 |
| A_21_P0003587  | THC2715285       | XLOC_003481    |                                                                                |                 | -0,683865962 |
| A_23_P218369   | NM_032963        | CCL14          | chemokine (C-C motif) ligand 14                                                | ENST00000536149 | -0,685442754 |
| A_21_P0007288  | TCONS_00019506   | XLOC_009305    |                                                                                |                 | -0,685954032 |
| A_23_P108673   | NM_032181        | FAM176A        | family with sequence similarity 176, member A                                  | ENST00000410113 | -0,687051946 |
| A_21_P0003931  | NR_027180        | MIR143HG       | MIR143 host gene (non-protein coding)                                          |                 | -0,687098375 |

|                |                  |                |                                                           |                 |              |
|----------------|------------------|----------------|-----------------------------------------------------------|-----------------|--------------|
| A_21_P0010813  | ENST00000450890  | XLOC_I2_001537 |                                                           | ENST00000450890 | -0,687288077 |
| A_19_P00805942 | NM_020949        | SLC7A14        | solute carrier family 7 (orphan transporter), member 14   |                 | -0,687937908 |
| A_21_P0003708  | TCONS_00008392   | XLOC_003842    |                                                           |                 | -0,687951362 |
| A_33_P3461416  | NM_001083899     | GP6            | glycoprotein VI (platelet)                                | ENST00000310373 | -0,688246659 |
| A_21_P0003084  | TCONS_00006357   | XLOC_002976    |                                                           |                 | -0,688432107 |
| A_33_P3305088  | AK126633         | LOC100129840   | uncharacterized LOC100129840                              |                 | -0,688557662 |
| A_21_P0002437  | TCONS_00005144   | XLOC_002085    |                                                           |                 | -0,688716059 |
| A_23_P47168    | NM_013280        | FLRT1          | fibronectin leucine rich transmembrane protein 1          | ENST00000246841 | -0,688758698 |
| A_23_P305977   | NM_001012642     | GRAMD2         | GRAM domain containing 2                                  | ENST00000309731 | -0,68881122  |
| A_21_P0000453  | NR_003352        | SNORD115-37    | small nucleolar RNA, C/D box 115-37                       |                 | -0,689079634 |
| A_23_P103349   | NM_022375        | OCLM           | oculomedin                                                |                 | -0,689748987 |
| A_21_P0008770  | TCONS_00023767   | XLOC_011564    |                                                           |                 | -0,690011276 |
| A_21_P0012272  | TCONS_I2_0001783 | XLOC_I2_009439 |                                                           |                 | -0,69028509  |
| A_21_P0006564  | NR_003255        | TSIX           | TSIX transcript, XIST antisense RNA (non-protein coding)  |                 | -0,690571424 |
| A_21_P0009522  | TCONS_00026411   | XLOC_012754    |                                                           |                 | -0,6915941   |
| A_33_P3414192  | NM_001206572     | SORCS1         | sortilin-related VPS10 domain containing receptor 1       | ENST00000369698 | -0,691637851 |
| A_21_P0002149  | ENST00000457178  | XLOC_002542    |                                                           | ENST00000457178 | -0,691665767 |
| A_33_P3385782  | NM_182633        | ZNF713         | zinc finger protein 713                                   | ENST00000429591 | -0,691994208 |
| A_23_P32805    | NM_017551        | GRID1          | glutamate receptor, ionotropic, delta 1                   | ENST00000464741 | -0,692021741 |
| A_23_P103703   | NM_014424        | HSPB7          | heat shock 27kDa protein family, member 7 (cardiovascular | ENST00000375714 | -0,692573026 |
| A_19_P00800229 | TCONS_00024662   | XLOC_011950    |                                                           |                 | -0,69316022  |
| A_21_P0002450  | TCONS_00004279   | XLOC_002117    |                                                           |                 | -0,695477938 |
| A_33_P3357182  | ENST00000380188  | C6orf146       | chromosome 6 open reading frame 146                       | ENST00000380188 | -0,696011086 |
| A_23_P107116   | NM_007148        | RNF112         | ring finger protein 112                                   |                 | -0,696349281 |
| A_24_P118196   | NM_001080393     | GXYLT2         | glucoside xylosyltransferase 2                            | ENST00000389617 | -0,696896672 |
| A_21_P0004101  | ENST00000503953  | XLOC_004735    |                                                           | ENST00000503953 | -0,698210912 |
| A_23_P110052   | NM_023067        | FOXL2          | forkhead box L2                                           | ENST00000542203 | -0,698236921 |
| A_23_P110266   | NM_024574        | NDNF           | neuron-derived neurotrophic factor                        | ENST00000379692 | -0,698741205 |
| A_21_P0012791  | ENST00000509671  | XLOC_I2_011255 |                                                           | ENST00000509671 | -0,698880537 |

|                |                  |                |                                                                     |                 |              |
|----------------|------------------|----------------|---------------------------------------------------------------------|-----------------|--------------|
| A_33_P3282698  | ENST00000492538  | GNAZ           | guanine nucleotide binding protein (G protein), alpha z poly        | ENST00000492538 | -0,700450821 |
| A_33_P3889862  | NR_040038        | LOC151475      | uncharacterized LOC151475                                           | ENST00000415174 | -0,700507482 |
| A_23_P110319   | NM_025087        | CWH43          | cell wall biogenesis 43 C-terminal homolog ( <i>S. cerevisiae</i> ) | ENST00000226432 | -0,700733239 |
| A_19_P00810491 | ENST00000457669  | XLOC_014068    |                                                                     | ENST00000457669 | -0,700784328 |
| A_33_P3325748  | NM_138632        | TRIOBP         | TRIO and F-actin binding protein                                    | ENST00000407319 | -0,701159959 |
| A_21_P0013277  | TCONS_I2_0002626 | XLOC_I2_013646 |                                                                     |                 | -0,702750777 |
| A_21_P0014731  | XR_113052        | LOC100508633   | uncharacterized LOC100508633                                        |                 | -0,703159746 |
| A_23_P166438   | NM_030642        | APOL5          | apolipoprotein L, 5                                                 | ENST00000249044 | -0,704800073 |
| A_23_P44867    | NM_016519        | AMBN           | ameloblastin (enamel matrix protein)                                | ENST00000449493 | -0,704994661 |
| A_24_P920646   | BC035714         | CYP19A1        | cytochrome P450, family 19, subfamily A, polypeptide 1              | ENST00000405913 | -0,70538122  |
| A_21_P0008536  | TCONS_00023112   | XLOC_011038    |                                                                     |                 | -0,70554801  |
| A_21_P0009789  | TCONS_00027541   | XLOC_013072    |                                                                     |                 | -0,705715226 |
| A_23_P121665   | NM_020777        | SORCS2         | sortilin-related VPS10 domain containing receptor 2                 | ENST00000507866 | -0,706230463 |
| A_21_P0000843  | NR_038930        | LOC100507250   | uncharacterized LOC100507250                                        |                 | -0,706692903 |
| A_24_P367496   | AK124894         | LOC100131650   | uncharacterized LOC100131650                                        |                 | -0,706944843 |
| A_32_P149060   | NR_024092        | C21orf71       | chromosome 21 open reading frame 71                                 |                 | -0,706972881 |
| A_21_P0012512  | ENST00000496247  | XLOC_I2_009986 |                                                                     | ENST00000496247 | -0,707660075 |
| A_33_P3891747  | AK095403         | LOC284072      | uncharacterized LOC284072                                           |                 | -0,70865261  |
| A_21_P0011794  | TCONS_I2_0001350 | XLOC_I2_007237 |                                                                     |                 | -0,708693848 |
| A_33_P3231631  | NM_001005216     | OR2J3          | olfactory receptor, family 2, subfamily J, member 3                 | ENST00000377169 | -0,709417858 |
| A_23_P37994    | NM_016212        | TP53TG3        | TP53 target 3                                                       | ENST00000398682 | -0,709742112 |
| A_23_P113553   | NM_001011544     | MAGEA11        | melanoma antigen family A, 11                                       | ENST00000355220 | -0,709808285 |
| A_21_P0003747  | TCONS_00008503   | XLOC_003982    |                                                                     |                 | -0,709847301 |
| A_24_P164505   | NR_026810        | FAM106CP       | family with sequence similarity 106, member C pseudogene            | ENST00000392176 | -0,710437713 |
| A_33_P3304157  | NM_001858        | COL19A1        | collagen, type XIX, alpha 1                                         | ENST00000322773 | -0,710506081 |
| A_21_P0008839  | TCONS_00024008   | XLOC_011354    |                                                                     |                 | -0,711041657 |
| A_33_P3360167  | NM_001004731     | OR5AU1         | olfactory receptor, family 5, subfamily AU, member 1                | ENST00000304418 | -0,711411838 |
| A_21_P0008793  | BX119465         | XLOC_011596    |                                                                     |                 | -0,711667476 |
| A_33_P3412767  | NM_032184        | SYDE2          | synapse defective 1, Rho GTPase, homolog 2 ( <i>C. elegans</i> )    | ENST00000341460 | -0,711707661 |

|               |                 |              |                                                                |                 |  |              |
|---------------|-----------------|--------------|----------------------------------------------------------------|-----------------|--|--------------|
| A_21_P0008285 | TCONS_00022389  | XLOC_010754  |                                                                |                 |  | -0,712920261 |
| A_21_P0004306 | TCONS_00010108  | XLOC_004576  |                                                                |                 |  | -0,713180294 |
| A_21_P0005559 | TCONS_00014122  | XLOC_006073  |                                                                |                 |  | -0,713645109 |
| A_23_P128503  | NM_018402       | IL26         | interleukin 26                                                 | ENST00000229134 |  | -0,714000847 |
| A_23_P114353  | NM_032946       | NXF5         | nuclear RNA export factor 5                                    | ENST00000263032 |  | -0,714722612 |
| A_21_P0008842 | TCONS_00024034  | XLOC_011397  |                                                                |                 |  | -0,715556108 |
| A_21_P0003457 | ENST00000509666 | XLOC_003916  |                                                                | ENST00000509666 |  | -0,716036328 |
| A_23_P355980  | ENST00000413302 | P2RX6        | purinergic receptor P2X, ligand-gated ion channel, 6           | ENST00000413302 |  | -0,716595328 |
| A_33_P3263569 | NM_152763       | AKNAD1       | AKNA domain containing 1                                       | ENST00000474186 |  | -0,717417329 |
| A_23_P83498   | NM_006546       | IGF2BP1      | insulin-like growth factor 2 mRNA binding protein 1            | ENST00000290341 |  | -0,717697751 |
| A_23_P93169   | NM_016571       | LGSN         | lensin, lens protein with glutamine synthetase domain          | ENST00000370657 |  | -0,717743287 |
| A_21_P0007561 | TCONS_00020434  | XLOC_009764  |                                                                |                 |  | -0,717788749 |
| A_23_P211417  | NM_021026       | RFPL1        | ret finger protein-like 1                                      | ENST00000354373 |  | -0,718040793 |
| A_23_P83498   | NM_006546       | IGF2BP1      | insulin-like growth factor 2 mRNA binding protein 1            | ENST00000290341 |  | -0,718145693 |
| A_33_P3310274 | ENST00000420582 | LGR6         | leucine-rich repeat containing G protein-coupled receptor 6    | ENST00000420582 |  | -0,718209778 |
| A_21_P0004298 | TCONS_00010095  | XLOC_004554  |                                                                |                 |  | -0,718289737 |
| A_21_P0008520 | TCONS_00023036  | XLOC_010908  |                                                                |                 |  | -0,719058771 |
| A_21_P0014719 | XR_112623       | LOC100507930 | uncharacterized LOC100507930                                   |                 |  | -0,719235669 |
| A_23_P61524   | NM_022903       | CCDC71       | coiled-coil domain containing 71                               | ENST00000321895 |  | -0,720020364 |
| A_21_P0003014 | TCONS_00006167  | XLOC_002772  |                                                                |                 |  | -0,720081385 |
| A_21_P0012367 | NM_152536       | FGD5         | FYVE, RhoGEF and PH domain containing 5                        | ENST00000502451 |  | -0,72034088  |
| A_21_P0003360 | THC2642744      | XLOC_003528  |                                                                |                 |  | -0,720493684 |
| A_33_P3284448 | NR_038857       | LOC441009    | uncharacterized LOC441009                                      |                 |  | -0,720697022 |
| A_21_P0002710 | ENST00000489729 | NAALADL2     | N-acetylated alpha-linked acidic dipeptidase-like 2            | ENST00000489729 |  | -0,720816607 |
| A_33_P3268652 | ENST00000403208 | SLC2A11      | solute carrier family 2 (facilitated glucose transporter), men | ENST00000403208 |  | -0,721346064 |
| A_33_P3335535 | NR_040046       | LOC100128682 | uncharacterized LOC100128682                                   | ENST00000536898 |  | -0,721374164 |
| A_23_P121545  | NM_201591       | GPM6A        | glycoprotein M6A                                               | ENST00000280187 |  | -0,722550746 |
| A_33_P3259112 | NR_033988       | FLJ41278     | uncharacterized LOC400046                                      | ENST00000535058 |  | -0,722950954 |
| A_33_P3225948 | NM_001042478    | AJAP1        | adherens junctions associated protein 1                        | ENST00000378190 |  | -0,723785465 |



|               |                 |              |                                                                 |  |                 |              |
|---------------|-----------------|--------------|-----------------------------------------------------------------|--|-----------------|--------------|
| A_21_P0001796 | AK091000        | XLOC_002322  |                                                                 |  |                 | -0,724259752 |
| A_21_P0007984 | ENST00000416261 | XLOC_010556  |                                                                 |  | ENST00000416261 | -0,725089715 |
| A_23_P79155   | NM_001508       | GPR39        | G protein-coupled receptor 39                                   |  | ENST00000470071 | -0,7250988   |
| A_21_P0003485 | ENST00000515728 | XLOC_004024  |                                                                 |  | ENST00000515728 | -0,72518552  |
| A_21_P0006086 | ENST00000425666 | XLOC_007769  |                                                                 |  | ENST00000425666 | -0,725584146 |
| A_33_P3254811 | NM_001025266    | C3orf70      | chromosome 3 open reading frame 70                              |  | ENST00000335012 | -0,725652037 |
| A_33_P3318490 | BC014432        | PDZRN3       | PDZ domain containing ring finger 3                             |  | ENST00000308537 | -0,726944894 |
| A_33_P3234303 | ENST00000379123 | PAX6         | paired box 6                                                    |  | ENST00000379123 | -0,728114669 |
| A_33_P3330179 | XR_110620       | LOC100131372 | uncharacterized LOC100131372                                    |  |                 | -0,728194082 |
| A_33_P3542886 | BU536871        | SNAR-G1      | small ILF3/NF90-associated RNA G1                               |  |                 | -0,728257044 |
| A_21_P0014857 | XR_132744       | LOC100506276 | uncharacterized LOC100506276                                    |  | ENST00000414610 | -0,7297889   |
| A_23_P122052  | NM_001008397    | GPX8         | glutathione peroxidase 8 (putative)                             |  | ENST00000503787 | -0,729803859 |
| A_33_P3229487 | NM_001004726    | OR4X1        | olfactory receptor, family 4, subfamily X, member 1             |  | ENST00000320048 | -0,729955938 |
| A_21_P0005580 | TCONS_00014226  | XLOC_006281  |                                                                 |  |                 | -0,730373221 |
| A_21_P0007977 | ENST00000444744 | XLOC_010543  |                                                                 |  | ENST00000444744 | -0,730700478 |
| A_23_P107116  | NM_007148       | RNF112       | ring finger protein 112                                         |  |                 | -0,732003864 |
| A_33_P3213512 | ENST00000551769 | COQ5         | coenzyme Q5 homolog, methyltransferase ( <i>S. cerevisiae</i> ) |  | ENST00000551769 | -0,732795538 |
| A_21_P0006744 | ENST00000414308 | XLOC_008774  |                                                                 |  | ENST00000414308 | -0,733132441 |
| A_21_P0003684 | BU655974        | XLOC_003790  |                                                                 |  |                 | -0,733254257 |
| A_21_P0009261 | TCONS_00025440  | XLOC_012258  |                                                                 |  |                 | -0,734105095 |
| A_33_P3644503 | NR_027124       | LOC339568    | uncharacterized LOC339568                                       |  | ENST00000412672 | -0,73432355  |
| A_23_P116640  | NM_033180       | OR51B2       | olfactory receptor, family 51, subfamily B, member 2            |  | ENST00000328813 | -0,734423125 |
| A_32_P176018  | NM_030812       | ACTL8        | actin-like 8                                                    |  | ENST00000375406 | -0,734634269 |
| A_21_P0008209 | TCONS_00022102  | XLOC_010713  |                                                                 |  |                 | -0,735007257 |
| A_23_P116640  | NM_033180       | OR51B2       | olfactory receptor, family 51, subfamily B, member 2            |  | ENST00000328813 | -0,737018487 |
| A_24_P910667  | AF220235        | GAF3         | FGF-2 activity-associated protein 3                             |  |                 | -0,737735767 |
| A_33_P3300232 | NM_032821       | HYDIN        | hydrocephalus inducing homolog (mouse)                          |  | ENST00000543521 | -0,739222494 |
| A_23_P169039  | NM_003068       | SNAI2        | snail homolog 2 ( <i>Drosophila</i> )                           |  | ENST00000396822 | -0,739388506 |
| A_21_P0002810 | XR_108518       | LOC100505609 | uncharacterized LOC100505609                                    |  | ENST00000464537 | -0,740206539 |

|                |                 |                |                                                           |                 |              |
|----------------|-----------------|----------------|-----------------------------------------------------------|-----------------|--------------|
| A_21_P0008636  | TCONS_00023422  | XLOC_011264    |                                                           |                 | -0,740232162 |
| A_33_P3406572  | AK091704        | LOC149773      | uncharacterized LOC149773                                 |                 | -0,740305372 |
| A_23_P148829   | NM_080431       | ACTRT2         | actin-related protein T2                                  | ENST00000378404 | -0,74115148  |
| A_23_P74012    | NM_005987       | SPRR1A         | small proline-rich protein 1A                             | ENST00000307122 | -0,741513021 |
| A_21_P0002550  | TCONS_00004619  | XLOC_002528    |                                                           |                 | -0,741905294 |
| A_19_P00319532 | THC2563770      | P51957         |                                                           |                 | -0,742136534 |
| A_23_P11256    | NM_138703       | MAGEE2         | melanoma antigen family E, 2                              | ENST00000373359 | -0,742215075 |
| A_33_P3323564  | NR_037195       | LOC646324      | uncharacterized LOC646324                                 | ENST00000423530 | -0,742432324 |
| A_21_P0008489  | ENST00000553561 | XLOC_011133    |                                                           | ENST00000553561 | -0,74307769  |
| A_33_P3358213  | NM_207421       | PADI6          | peptidyl arginine deiminase, type VI                      | ENST00000434762 | -0,743340732 |
| A_23_P83498    | NM_006546       | IGF2BP1        | insulin-like growth factor 2 mRNA binding protein 1       | ENST00000290341 | -0,743492464 |
| A_21_P0013220  | BI830525        | XLOC_I2_013456 |                                                           |                 | -0,744824392 |
| A_33_P3213707  | NM_025239       | PDCD1LG2       | programmed cell death 1 ligand 2                          | ENST00000397745 | -0,745150202 |
| A_21_P0006816  | TCONS_00018090  | XLOC_008357    |                                                           |                 | -0,746469547 |
| A_21_P0014638  | XR_110858       | LOC100507030   | uncharacterized LOC100507030                              | ENST00000443763 | -0,746488938 |
| A_21_P0006153  | TCONS_00016012  | XLOC_007402    |                                                           |                 | -0,74698277  |
| A_33_P3349671  | AK124340        | ERVI-1         | endogenous retrovirus group I, member 1                   |                 | -0,747127976 |
| A_23_P10936    | NM_033060       | KRTAP4-1       | keratin associated protein 4-1                            | ENST00000398472 | -0,747892179 |
| A_23_P215111   | NM_020632       | ATP6V0A4       | ATPase, H+ transporting, lysosomal V0 subunit a4          | ENST00000310018 | -0,748631212 |
| A_21_P0001403  | TCONS_00001231  | XLOC_000508    |                                                           |                 | -0,749039509 |
| A_21_P0004441  | TCONS_00010468  | XLOC_004988    |                                                           |                 | -0,752974079 |
| A_21_P0003913  | TCONS_00009185  | XLOC_004198    |                                                           |                 | -0,75304565  |
| A_33_P3290830  | NR_026916       | ANKRD30BP2     | ankyrin repeat domain 30B pseudogene 2                    | ENST00000447861 | -0,753535657 |
| A_21_P0006098  | ENST00000446206 | XLOC_007819    |                                                           | ENST00000446206 | -0,754474978 |
| A_33_P3321871  | NR_038862       | FLJ42102       | uncharacterized LOC399923                                 | ENST00000331301 | -0,7549637   |
| A_33_P3238548  | NM_025041       | C3orf36        | chromosome 3 open reading frame 36                        | ENST00000408895 | -0,755284082 |
| A_23_P211631   | NM_006486       | FBLN1          | fibulin 1                                                 | ENST00000348697 | -0,755408696 |
| A_21_P0005716  | ENST00000520273 | XKR9           | XK, Kell blood group complex subunit-related family, memb | ENST00000520273 | -0,755432803 |
| A_21_P0008521  | TCONS_00023036  | XLOC_010908    |                                                           |                 | -0,755845626 |

|                |                 |                |                                                           |                 |              |
|----------------|-----------------|----------------|-----------------------------------------------------------|-----------------|--------------|
| A_21_P0006772  | ENST00000455498 | XLOC_008862    |                                                           | ENST00000455498 | -0,755979675 |
| A_21_P0005391  | TCONS_00013490  | XLOC_006133    |                                                           |                 | -0,756298244 |
| A_23_P114713   | NM_000779       | CYP4B1         | cytochrome P450, family 4, subfamily B, polypeptide 1     | ENST00000371923 | -0,756537829 |
| A_23_P130398   | NM_172241       | CTAGE1         | cutaneous T-cell lymphoma-associated antigen 1            | ENST00000391403 | -0,756961075 |
| A_33_P3354792  | XR_112948       | LOC441179      | uncharacterized LOC441179                                 |                 | -0,75705208  |
| A_21_P0012759  | ENST00000509017 | XLOC_I2_010976 |                                                           | ENST00000509017 | -0,758146778 |
| A_33_P3363316  | NR_015401       | FLJ35390       | uncharacterized LOC255031                                 |                 | -0,758202579 |
| A_21_P0002716  | ENST00000490647 | XLOC_003226    |                                                           | ENST00000490647 | -0,758329541 |
| A_21_P0004639  | ENST00000414502 | XLOC_005228    |                                                           | ENST00000414502 | -0,758591311 |
| A_21_P0009875  | NR_015406       | LOC149837      | uncharacterized LOC149837                                 | ENST00000456714 | -0,758702347 |
| A_33_P3309809  | ENST00000409053 | RHBDD1         | rhomoid domain containing 1                               | ENST00000409053 | -0,75872179  |
| A_33_P3280471  | NM_001982       | ERBB3          | v-erb-b2 erythroblastic leukemia viral oncogene homolog 3 | ENST00000394099 | -0,75899191  |
| A_23_P331211   | NM_153446       | B4GALNT2       | beta-1,4-N-acetyl-galactosaminyl transferase 2            | ENST00000300404 | -0,760293541 |
| A_21_P0008933  | THC2749792      | XLOC_011716    |                                                           |                 | -0,760708263 |
| A_33_P3400334  | AK127532        | LOC100130372   | uncharacterized LOC100130372                              |                 | -0,76166133  |
| A_23_P107116   | NM_007148       | RNF112         | ring finger protein 112                                   |                 | -0,762028807 |
| A_21_P0013131  | ENST00000450618 | XLOC_I2_012518 |                                                           | ENST00000450618 | -0,762684108 |
| A_21_P0007378  | ENST00000526840 | XLOC_009515    |                                                           | ENST00000526840 | -0,76312653  |
| A_23_P382811   | NM_152628       | SNX31          | sorting nexin 31                                          | ENST00000428383 | -0,763367762 |
| A_21_P0002927  | TCONS_00005936  | XLOC_002563    |                                                           |                 | -0,763395926 |
| A_19_P00322733 | BC032741        | XLOC_I2_015585 |                                                           |                 | -0,765538367 |
| A_33_P3252048  | NM_001007533    | PPP1R27        | protein phosphatase 1, regulatory subunit 27              | ENST00000330261 | -0,765872648 |
| A_21_P0004990  | TCONS_00012047  | XLOC_005579    |                                                           |                 | -0,766365239 |
| A_23_P376172   | NM_178840       | C1orf64        | chromosome 1 open reading frame 64                        | ENST00000329454 | -0,767801958 |
| A_23_P101084   | NM_032598       | SPATA22        | spermatogenesis associated 22                             | ENST00000541913 | -0,767863296 |
| A_21_P0005691  | ENST00000521257 | XLOC_006780    |                                                           | ENST00000521257 | -0,769453404 |
| A_19_P00805593 | CR607950        | XLOC_008652    |                                                           |                 | -0,770831896 |
| A_33_P3303102  | AK092022        | MYNN           | myoneurin                                                 |                 | -0,771335534 |
| A_33_P3250333  | NM_207437       | DNAH10         | dynein, axonemal, heavy chain 10                          | ENST00000497783 | -0,771384972 |

|                |                  |                |                                                      |                 |  |              |
|----------------|------------------|----------------|------------------------------------------------------|-----------------|--|--------------|
| A_21_P0013609  | TCONS_I2_0002913 | XLOC_I2_015075 |                                                      |                 |  | -0,772414847 |
| A_33_P3343316  | NM_031469        | SH3BGR2        | SH3 domain binding glutamic acid-rich protein like 2 | ENST00000369838 |  | -0,772893837 |
| A_21_P0004728  | NR_027793        | C6orf218       | chromosome 6 open reading frame 218                  |                 |  | -0,773401218 |
| A_33_P3247559  | NM_001144937     | FNDC7          | fibronectin type III domain containing 7             | ENST00000370017 |  | -0,77365046  |
| A_21_P0011805  | TCONS_I2_0001373 | XLOC_I2_007401 |                                                      |                 |  | -0,774023617 |
| A_21_P0009706  | TCONS_00026984   | XLOC_013036    |                                                      |                 |  | -0,774268585 |
| A_23_P101084   | NM_032598        | SPATA22        | spermatogenesis associated 22                        | ENST00000541913 |  | -0,7750801   |
| A_23_P168288   | NM_052962        | IL22RA2        | interleukin 22 receptor, alpha 2                     | ENST00000296980 |  | -0,77594058  |
| A_33_P3663105  | BC038429         | LOC284263      | uncharacterized LOC284263                            |                 |  | -0,776513008 |
| A_21_P0014223  | XR_108915        | LOC100505613   | uncharacterized LOC100505613                         |                 |  | -0,778156505 |
| A_32_P114003   | NR_024360        | LOC100192378   | uncharacterized LOC100192378                         |                 |  | -0,77881061  |
| A_21_P0012883  | THC2688337       | XLOC_I2_011911 |                                                      |                 |  | -0,779172417 |
| A_23_P133236   | NM_018934        | PCDHB14        | protocadherin beta 14                                | ENST00000515856 |  | -0,780221084 |
| A_21_P0006972  | TCONS_00018439   | XLOC_008731    |                                                      |                 |  | -0,781992228 |
| A_32_P44534    | NM_182559        | TMPRSS12       | transmembrane (C-terminal) protease, serine 12       | ENST00000398458 |  | -0,783067008 |
| A_21_P0008354  | TCONS_00022548   | XLOC_010866    |                                                      |                 |  | -0,783165267 |
| A_23_P417918   | NM_006211        | PENK           | proenkephalin                                        | ENST00000539312 |  | -0,783424132 |
| A_24_P322229   | NM_033315        | RASL10B        | RAS-like, family 10, member B                        | ENST00000268864 |  | -0,784335635 |
| A_23_P102331   | NM_002976        | SCN7A          | sodium channel, voltage-gated, type VII, alpha       | ENST00000409855 |  | -0,784805866 |
| A_23_P364444   | ENST00000462493  | FAM65C         | family with sequence similarity 65, member C         | ENST00000462493 |  | -0,784958507 |
| A_19_P00322571 | NR_033319        | MIAT           |                                                      |                 |  | -0,785294333 |
| A_23_P83498    | NM_006546        | IGF2BP1        | insulin-like growth factor 2 mRNA binding protein 1  | ENST00000290341 |  | -0,785737879 |
| A_23_P110052   | NM_023067        | FOXL2          | forkhead box L2                                      | ENST00000542203 |  | -0,786176683 |
| A_23_P164011   | NM_006942        | SOX15          | SRY (sex determining region Y)-box 15                | ENST00000250055 |  | -0,786992068 |
| A_21_P0001138  | ENST00000439156  | XLOC_000855    |                                                      | ENST00000439156 |  | -0,789092909 |
| A_33_P3352995  | NM_001025295     | IFITM5         | interferon induced transmembrane protein 5           | ENST00000382614 |  | -0,789499786 |
| A_21_P0011205  | ENST00000444795  | XLOC_I2_003840 |                                                      | ENST00000444795 |  | -0,790387467 |
| A_33_P3415336  | ENST00000462747  | ALS2           | amyotrophic lateral sclerosis 2 (juvenile)           | ENST00000462747 |  | -0,791131263 |
| A_21_P0009223  | ENST00000458492  | XLOC_012115    |                                                      | ENST00000458492 |  | -0,791510267 |

|               |                  |                |                                                            |                 |              |
|---------------|------------------|----------------|------------------------------------------------------------|-----------------|--------------|
| A_23_P401361  | NM_020845        | PITPNM2        | phosphatidylinositol transfer protein, membrane-associated | ENST00000542749 | -0,79164953  |
| A_21_P0013488 | TCONS_I2_0002778 | XLOC_I2_014217 |                                                            |                 | -0,792487926 |
| A_23_P101084  | NM_032598        | SPATA22        | spermatogenesis associated 22                              | ENST00000541913 | -0,79344847  |
| A_32_P204980  | NM_153230        | FBXO39         | F-box protein 39                                           | ENST00000321535 | -0,794601968 |
| A_23_P78504   | NM_020903        | USP29          | ubiquitin specific peptidase 29                            | ENST00000254181 | -0,794751313 |
| A_21_P0013916 | XM_001715728     | ANKRD62        | ankyrin repeat domain 62                                   |                 | -0,794828563 |
| A_21_P0003444 | NR_045414        | HTT-AS1        | HTT antisense RNA 1 (non-protein coding)                   | ENST00000503893 | -0,795221401 |
| A_21_P0002396 | TCONS_00004124   | XLOC_001969    |                                                            |                 | -0,79627679  |
| A_21_P0000930 | ENST00000425435  | XLOC_000847    |                                                            | ENST00000425435 | -0,79637778  |
| A_23_P161909  | NM_006138        | MS4A3          | membrane-spanning 4-domains, subfamily A, member 3 (he     | ENST00000534744 | -0,79672078  |
| A_23_P131263  | NM_033066        | MPP4           | membrane protein, palmitoylated 4 (MAGUK p55 subfamily     | ENST00000359962 | -0,797967943 |
| A_33_P3366221 | NM_014917        | NTNG1          | netrin G1                                                  | ENST00000370076 | -0,798185353 |
| A_21_P0002225 | TCONS_00003709   | XLOC_001496    |                                                            |                 | -0,799171343 |
| A_24_P331830  | NM_015209        | KAZN           | kazrin, periplakin interacting protein                     | ENST00000376028 | -0,799230143 |
| A_21_P0004150 | ENST00000504034  | XLOC_004917    |                                                            | ENST00000504034 | -0,799758114 |
| A_33_P3290403 | NM_014214        | IMPA2          | inositol(myo)-1(or 4)-monophosphatase 2                    | ENST00000383376 | -0,799765013 |
| A_21_P0003897 | TCONS_00009070   | XLOC_003974    |                                                            |                 | -0,799774349 |
| A_21_P0013258 | THC2565454       | XLOC_I2_013532 |                                                            |                 | -0,800176947 |
| A_21_P0013876 | TCONS_I2_0003089 | XLOC_I2_015879 |                                                            |                 | -0,800943508 |
| A_21_P0008045 | TCONS_00021747   | XLOC_010339    |                                                            |                 | -0,801073769 |
| A_23_P257962  | NM_007327        | GRIN1          | glutamate receptor, ionotropic, N-methyl D-aspartate 1     | ENST00000473811 | -0,801214545 |
| A_21_P0003909 | TCONS_00009176   | XLOC_004182    |                                                            |                 | -0,801551689 |
| A_23_P337849  | NM_007185        | CELF3          | CUGBP, Elav-like family member 3                           | ENST00000420342 | -0,80215701  |
| A_33_P3324839 | NM_006772        | SYNGAP1        | synaptic Ras GTPase activating protein 1                   | ENST00000418600 | -0,802682979 |
| A_21_P0014922 | XR_133153        | C18orf61       | chromosome 18 open reading frame 61                        |                 | -0,802938602 |
| A_21_P0014826 | XR_132673        | LOC100507579   | uncharacterized LOC100507579                               |                 | -0,80658745  |
| A_23_P123096  | NM_021955        | GNGT1          | guanine nucleotide binding protein (G protein), gamma trar | ENST00000429473 | -0,807381325 |
| A_33_P3256396 | NM_003585        | DOC2B          | double C2-like domains, beta                               |                 | -0,808401821 |
| A_23_P252928  | NM_005367        | MAGEA12        | melanoma antigen family A, 12                              | ENST00000393900 | -0,810398326 |



|               |                   |                |                                                     |                 |              |
|---------------|-------------------|----------------|-----------------------------------------------------|-----------------|--------------|
| A_23_P121545  | NM_201591         | GPM6A          | glycoprotein M6A                                    | ENST00000280187 | -0,810436234 |
| A_23_P16834   | NM_022823         | FNDC4          | fibronectin type III domain containing 4            | ENST00000491414 | -0,81116968  |
| A_21_P0005359 | NR_038393         | LOC100506178   | uncharacterized LOC100506178                        |                 | -0,811317985 |
| A_32_P327679  | NR_026882         | DKFZP434K028   | uncharacterized LOC26070                            |                 | -0,811423312 |
| A_21_P0008966 | TCONS_00024450    | XLOC_011774    |                                                     |                 | -0,811766108 |
| A_21_P0010010 | THC2687906        | XLOC_013670    |                                                     |                 | -0,812138616 |
| A_23_P29975   | NM_018302         | C4orf19        | chromosome 4 open reading frame 19                  | ENST00000284437 | -0,813671404 |
| A_21_P0012503 | ENST00000469812   | XLOC_I2_009929 |                                                     | ENST00000469812 | -0,814074879 |
| A_23_P114445  | NM_020932         | MAGEE1         | melanoma antigen family E, 1                        | ENST00000361470 | -0,816298622 |
| A_23_P140362  | NM_018228         | VRTN           | vertebrae development homolog (pig)                 | ENST00000256362 | -0,816516518 |
| A_23_P121545  | NM_201591         | GPM6A          | glycoprotein M6A                                    | ENST00000280187 | -0,817709211 |
| A_21_P0013143 | ENST00000436672   | XLOC_I2_013040 |                                                     | ENST00000436672 | -0,818650732 |
| A_21_P0009020 | TCONS_00024611    | XLOC_011900    |                                                     |                 | -0,819372191 |
| A_21_P0012862 | TCONS_I2_00022631 | XLOC_I2_011854 |                                                     |                 | -0,820597256 |
| A_23_P215744  | NM_033427         | CTTNBP2        | cortactin binding protein 2                         | ENST00000441556 | -0,82099316  |
| A_21_P0006234 | TCONS_00016201    | XLOC_007591    |                                                     |                 | -0,821249642 |
| A_33_P3226761 | NM_018419         | SOX18          | SRY (sex determining region Y)-box 18               | ENST00000340356 | -0,821480993 |
| A_23_P83498   | NM_006546         | IGF2BP1        | insulin-like growth factor 2 mRNA binding protein 1 | ENST00000290341 | -0,822036819 |
| A_21_P0000724 | NR_038209         | LOC100616530   | tospeak                                             |                 | -0,822053612 |
| A_21_P0013497 | TCONS_I2_00027821 | XLOC_I2_014245 |                                                     |                 | -0,822114946 |
| A_33_P3436935 | AK093107          | LOC284930      | uncharacterized LOC284930                           |                 | -0,823252357 |
| A_21_P0002968 | TCONS_00006076    | XLOC_002690    |                                                     |                 | -0,823509617 |
| A_21_P0006402 | XR_110614         | LOC100506641   | uncharacterized LOC100506641                        |                 | -0,824389173 |
| A_21_P0007001 | TCONS_00018526    | XLOC_008833    |                                                     |                 | -0,825594766 |
| A_21_P0007471 | ENST00000527533   | XLOC_009585    |                                                     | ENST00000527533 | -0,826392024 |
| A_23_P110052  | NM_023067         | FOXL2          | forkhead box L2                                     | ENST00000542203 | -0,827685926 |
| A_21_P0008129 | TCONS_00021936    | XLOC_010529    |                                                     |                 | -0,827809381 |
| A_33_P3561747 | NM_001145545      | C16orf82       | chromosome 16 open reading frame 82                 |                 | -0,828472705 |
| A_21_P0011584 | AK125757          | XLOC_I2_006036 |                                                     |                 | -0,828560666 |

|               |                 |                |                                                     |                 |              |
|---------------|-----------------|----------------|-----------------------------------------------------|-----------------|--------------|
| A_21_P0008436 | ENST00000556130 | XLOC_011017    |                                                     | ENST00000556130 | -0,828642057 |
| A_21_P0010001 | TCONS_00028312  | XLOC_013647    |                                                     |                 | -0,828777654 |
| A_21_P0008704 | TCONS_00023572  | XLOC_011396    |                                                     |                 | -0,828938435 |
| A_21_P0009897 | ENST00000416563 | XLOC_013713    |                                                     | ENST00000416563 | -0,830694797 |
| A_21_P0007409 | TCONS_00019778  | XLOC_009577    |                                                     |                 | -0,831105355 |
| A_33_P3220020 | NR_033899       | LOC440518      | golgin A2 pseudogene                                |                 | -0,832389587 |
| A_21_P0005675 | THC2766071      | XLOC_006745    |                                                     |                 | -0,832672765 |
| A_33_P3631022 | AJ315134        | LOC100270680   | uncharacterized LOC100270680                        |                 | -0,833119259 |
| A_23_P110764  | NM_006790       | MYOT           | myotilin                                            | ENST00000421631 | -0,833221515 |
| A_21_P0010151 | ENST00000426609 | XLOC_013889    |                                                     | ENST00000426609 | -0,833873771 |
| A_23_P102864  | NM_002772       | TMPRSS15       | transmembrane protease, serine 15                   | ENST00000284885 | -0,834512508 |
| A_21_P0004919 | TCONS_00011916  | XLOC_005424    |                                                     |                 | -0,836590786 |
| A_21_P0000907 | NR_027088       | LOC284661      | uncharacterized LOC284661                           | ENST00000423197 | -0,838771928 |
| A_21_P0008772 | BX116292        | XLOC_011565    |                                                     |                 | -0,8391144   |
| A_32_P205053  | ENST00000375099 | UBXN10         | UBX domain protein 10                               | ENST00000375099 | -0,839390102 |
| A_21_P0008746 | TCONS_00023690  | XLOC_011492    |                                                     |                 | -0,841106886 |
| A_23_P35977   | NM_024791       | PDZD3          | PDZ domain containing 3                             | ENST00000534790 | -0,841366258 |
| A_21_P0007920 | ENST00000422082 | XLOC_010287    |                                                     | ENST00000422082 | -0,841640596 |
| A_21_P0008065 | TCONS_00021794  | XLOC_010397    |                                                     |                 | -0,841764729 |
| A_23_P110052  | NM_023067       | FOXL2          | forkhead box L2                                     | ENST00000542203 | -0,842094266 |
| A_33_P3394252 | NM_152519       | C2orf67        | chromosome 2 open reading frame 67                  | ENST00000281772 | -0,842455446 |
| A_21_P0011734 | XR_109588       | LOC100505851   | uncharacterized LOC100505851                        |                 | -0,842679295 |
| A_32_P310503  | NM_001004688    | OR2M2          | olfactory receptor, family 2, subfamily M, member 2 | ENST00000359682 | -0,842703716 |
| A_33_P3210556 | NR_028139       | FLJ42289       | uncharacterized LOC388182                           | ENST00000340644 | -0,842759125 |
| A_21_P0011440 | AK057513        | XLOC_l2_005244 |                                                     |                 | -0,843768599 |
| A_23_P355517  | NM_024875       | SYNPO2L        | synaptopodin 2-like                                 | ENST00000394810 | -0,844721677 |
| A_23_P26154   | NM_002666       | PLIN1          | perilipin 1                                         | ENST00000430628 | -0,845731179 |
| A_33_P3270956 | NM_207506       | SAMD12         | sterile alpha motif domain containing 12            | ENST00000314727 | -0,845742742 |
| A_33_P3354399 | NM_198697       | KRTAP12-3      | keratin associated protein 12-3                     | ENST00000397907 | -0,846418104 |

|                |                 |                |                                                               |                 |              |
|----------------|-----------------|----------------|---------------------------------------------------------------|-----------------|--------------|
| A_21_P0002295  | TCONS_00003883  | XLOC_001684    |                                                               |                 | -0,847089469 |
| A_21_P0013147  | ENST00000404689 | XLOC_I2_013064 |                                                               | ENST00000404689 | -0,847557344 |
| A_23_P104972   | NM_023945       | MS4A5          | membrane-spanning 4-domains, subfamily A, member 5            | ENST00000300190 | -0,848001393 |
| A_21_P0010463  | THC2742326      | XLOC_014172    |                                                               |                 | -0,849126867 |
| A_33_P3279539  | NR_001526       | TTY17A         | testis-specific transcript, Y-linked 17A (non-protein coding) | ENST00000416110 | -0,849278336 |
| A_21_P0001637  | TCONS_00001853  | XLOC_001241    |                                                               |                 | -0,850110876 |
| A_21_P0010056  | TCONS_00028434  | XLOC_013786    |                                                               |                 | -0,850349799 |
| A_33_P3234882  | NM_002725       | PRELP          | proline/arginine-rich end leucine-rich repeat protein         | ENST00000343110 | -0,852275929 |
| A_23_P114983   | NM_032588       | TRIM63         | tripartite motif containing 63                                | ENST00000374272 | -0,853672564 |
| A_21_P0008603  | TCONS_00023325  | XLOC_011189    |                                                               |                 | -0,854399113 |
| A_21_P0007826  | TCONS_00021085  | XLOC_009678    |                                                               |                 | -0,854551741 |
| A_21_P0003564  | TCONS_00007969  | XLOC_003438    |                                                               |                 | -0,856461473 |
| A_24_P330633   | NM_000353       | TAT            | tyrosine aminotransferase                                     | ENST00000355962 | -0,857357668 |
| A_19_P00809697 | ENST00000417705 | XLOC_000670    |                                                               | ENST00000417705 | -0,858448519 |
| A_21_P0005336  | ENST00000438969 | XLOC_006620    |                                                               | ENST00000438969 | -0,859319337 |
| A_21_P0014643  | XR_110876       | LOC100507420   | uncharacterized LOC100507420                                  |                 | -0,859992904 |
| A_21_P0001090  | ENST00000429389 | XLOC_000681    |                                                               | ENST00000429389 | -0,861836238 |
| A_24_P110331   | NM_001145113    | MYADML2        | myeloid-associated differentiation marker-like 2              | ENST00000330655 | -0,862590812 |
| A_23_P110052   | NM_023067       | FOXL2          | forkhead box L2                                               | ENST00000542203 | -0,862603768 |
| A_21_P0002512  | TCONS_00004472  | XLOC_002352    |                                                               |                 | -0,863897962 |
| A_21_P0009370  | TCONS_00025784  | XLOC_012592    |                                                               |                 | -0,864234673 |
| A_33_P3356877  | NM_001001961    | OR13C3         | olfactory receptor, family 13, subfamily C, member 3          | ENST00000374781 | -0,86632097  |
| A_21_P0013864  | AK056524        | XLOC_I2_015710 |                                                               |                 | -0,866383976 |
| A_21_P0000183  | NR_040434       | LOC100505676   | uncharacterized LOC100505676                                  |                 | -0,866578509 |
| A_23_P108743   | NM_152381       | XIRP2          | xin actin-binding repeat containing 2                         | ENST00000295237 | -0,866915828 |
| A_21_P0004601  | AY314751        | TSG1           | tumor suppressor TSG1                                         |                 | -0,868285266 |
| A_21_P0012213  | NR_027072       | LINC00189      | long intergenic non-protein coding RNA 189                    | ENST00000545936 | -0,868852407 |
| A_21_P0001609  | TCONS_00001771  | XLOC_001153    |                                                               |                 | -0,869619151 |
| A_21_P0002274  | TCONS_00003825  | XLOC_001637    |                                                               |                 | -0,869750194 |

|                |                   |                |                                                      |  |                 |              |
|----------------|-------------------|----------------|------------------------------------------------------|--|-----------------|--------------|
| A_21_P0001424  | TCONS_00001281    | XLOC_000567    |                                                      |  |                 | -0,871679235 |
| A_33_P3483634  | NR_027108         | LOC285593      | uncharacterized LOC285593                            |  | ENST00000517299 | -0,873750992 |
| A_21_P0013939  | NM_001033858      | DCLRE1C        | DNA cross-link repair 1C                             |  | ENST00000418843 | -0,874432722 |
| A_21_P0012433  | ENST00000452244   | XLOC_I2_010097 |                                                      |  | ENST00000452244 | -0,875314128 |
| A_21_P0006354  | TCONS_00016624    | XLOC_007422    |                                                      |  |                 | -0,877210492 |
| A_21_P0008103  | TCONS_00021871    | XLOC_010470    |                                                      |  |                 | -0,877994241 |
| A_33_P3267844  | NM_001004757      | OR51Q1         | olfactory receptor, family 51, subfamily Q, member 1 |  | ENST00000300778 | -0,878489423 |
| A_21_P0005108  | ENST00000437559   | XLOC_005174    |                                                      |  | ENST00000437559 | -0,879398759 |
| A_21_P0011002  | THC2717621        | XLOC_I2_002502 |                                                      |  |                 | -0,879518769 |
| A_19_P00319573 | THC2541878        | XLOC_014192    |                                                      |  |                 | -0,882249501 |
| A_21_P0002109  | ENST00000432431   | XLOC_002345    |                                                      |  | ENST00000432431 | -0,88269096  |
| A_33_P3364801  | XM_379325         | LOC401180      | uncharacterized LOC401180                            |  |                 | -0,885631236 |
| A_33_P3409274  | ENST00000454421   | LOC100134256   | ig heavy chain V-III region VH26-like                |  | ENST00000454421 | -0,885987729 |
| A_21_P0009570  | THC2717186        | XLOC_012875    |                                                      |  |                 | -0,887127956 |
| A_21_P0007756  | TCONS_00020911    | XLOC_010191    |                                                      |  |                 | -0,888670893 |
| A_21_P0010556  | THC2531430        | XLOC_I2_000416 |                                                      |  |                 | -0,893417184 |
| A_21_P0012171  | TCONS_I2_00016979 | XLOC_I2_008991 |                                                      |  |                 | -0,895262841 |
| A_23_P369237   | NM_004797         | ADIPOQ         | adiponectin, C1Q and collagen domain containing      |  | ENST00000412955 | -0,898417711 |
| A_19_P00315519 | ENST00000511417   | XLOC_004914    |                                                      |  | ENST00000511417 | -0,898499733 |
| A_23_P255298   | NM_020707         | HHATL          | hedgehog acyltransferase-like                        |  | ENST00000341477 | -0,900976614 |
| A_33_P3224946  | XR_108603         | FLJ46010       | FLJ46010 protein                                     |  |                 | -0,902734    |
| A_23_P110052   | NM_023067         | FOXL2          | forkhead box L2                                      |  | ENST00000542203 | -0,903948522 |
| A_21_P0006987  | ENST00000457255   | XLOC_008777    |                                                      |  | ENST00000457255 | -0,904091646 |
| A_21_P0007079  | ENST00000436430   | XLOC_008636    |                                                      |  | ENST00000436430 | -0,90467126  |
| A_21_P0004431  | TCONS_00010443    | XLOC_004959    |                                                      |  |                 | -0,908056779 |
| A_33_P3754922  | BP873537          | RNU11          | RNA, U11 small nuclear                               |  |                 | -0,910035823 |
| A_23_P74895    | NM_024674         | LIN28A         | lin-28 homolog A (C. elegans)                        |  | ENST00000254231 | -0,911395355 |
| A_33_P3821494  | AK094442          | LOC284939      | uncharacterized LOC284939                            |  |                 | -0,911456706 |
| A_21_P0008943  | TCONS_00024412    | XLOC_011724    |                                                      |  |                 | -0,912237572 |

|                |                 |              |                                                            |                 |              |
|----------------|-----------------|--------------|------------------------------------------------------------|-----------------|--------------|
| A_21_P0010168  | ENST00000417820 | XLOC_013973  |                                                            | ENST00000417820 | -0,915636578 |
| A_21_P0008879  | BX445613        | XLOC_011882  |                                                            |                 | -0,916766159 |
| A_21_P0002016  | NR_038434       | LOC100506474 | uncharacterized LOC100506474                               | ENST00000421112 | -0,918340885 |
| A_21_P0010264  | TCONS_00029062  | XLOC_013983  |                                                            |                 | -0,919137944 |
| A_33_P3293869  | ENST00000369086 | TIAL1        | TIA1 cytotoxic granule-associated RNA binding protein-like | ENST00000369086 | -0,919319814 |
| A_23_P47806    | NM_012064       | MIP          | major intrinsic protein of lens fiber                      | ENST00000557333 | -0,922460693 |
| A_21_P0007639  | TCONS_00020585  | XLOC_009899  |                                                            |                 | -0,923755332 |
| A_23_P110319   | NM_025087       | CWH43        | cell wall biogenesis 43 C-terminal homolog (S. cerevisiae) | ENST00000226432 | -0,924400012 |
| A_19_P00322942 | BX640700        | XLOC_004598  |                                                            |                 | -0,92595089  |
| A_19_P00811430 | TCONS_00023880  | XLOC_011183  |                                                            |                 | -0,927679727 |
| A_21_P0002427  | TCONS_00004220  | XLOC_002064  |                                                            |                 | -0,927729461 |
| A_33_P3215913  | ENST00000403210 | TMEM184B     | transmembrane protein 184B                                 | ENST00000403210 | -0,92802669  |
| A_21_P0009128  | NR_027755       | LOC283867    | uncharacterized LOC283867                                  |                 | -0,92973009  |
| A_21_P0004988  | TCONS_00012041  | XLOC_005575  |                                                            |                 | -0,931036471 |
| A_21_P0004092  | ENST00000513859 | XLOC_004714  |                                                            | ENST00000513859 | -0,931200652 |
| A_21_P0002377  | AK096937        | LOC285191    | uncharacterized LOC285191                                  | ENST00000407635 | -0,935981008 |
| A_21_P0006087  | ENST00000436671 | XLOC_007769  |                                                            | ENST00000436671 | -0,937041847 |
| A_23_P217379   | NM_033641       | COL4A6       | collagen, type IV, alpha 6                                 | ENST00000394872 | -0,941509551 |
| A_21_P0008128  | TCONS_00021928  | XLOC_010525  |                                                            |                 | -0,942066879 |
| A_21_P0009115  | BC131758        | XLOC_011821  |                                                            |                 | -0,942106067 |
| A_21_P0007196  | TCONS_00019279  | XLOC_009112  |                                                            |                 | -0,945016003 |
| A_21_P0003696  | TCONS_00008373  | XLOC_003829  |                                                            |                 | -0,94508602  |
| A_23_P119040   | NM_001142966    | GREB1L       | growth regulation by estrogen in breast cancer-like        | ENST00000424526 | -0,945560225 |
| A_33_P3348629  | NM_002159       | HTN1         | histatin 1                                                 | ENST00000503645 | -0,947810907 |
| A_23_P106016   | NM_002742       | PRKD1        | protein kinase D1                                          | ENST00000331968 | -0,947987744 |
| A_33_P3337584  | AK092513        | LOC283482    | uncharacterized LOC283482                                  |                 | -0,95097176  |
| A_33_P3380356  | AK126705        | LOC100127991 | uncharacterized LOC100127991                               |                 | -0,952289377 |
| A_21_P0009283  | TCONS_00025512  | XLOC_012324  |                                                            |                 | -0,958371586 |
| A_21_P0004130  | ENST00000431789 | XLOC_004832  |                                                            | ENST00000431789 | -0,960951957 |



|               |                   |                |                                                         |                 |  |              |
|---------------|-------------------|----------------|---------------------------------------------------------|-----------------|--|--------------|
| A_21_P0009948 | TCONS_00028129    | XLOC_013487    |                                                         |                 |  | -0,96133966  |
| A_21_P0008720 | TCONS_00023625    | XLOC_011424    |                                                         |                 |  | -0,961810714 |
| A_21_P0004854 | TCONS_00011736    | XLOC_005202    |                                                         |                 |  | -0,964508058 |
| A_33_P3629930 | NR_038867         | ZNF32-AS3      | ZNF32 antisense RNA 3 (non-protein coding)              | ENST00000458063 |  | -0,967537574 |
| A_33_P3370600 | NM_001162997      | C17orf110      | chromosome 17 open reading frame 110                    | ENST00000556126 |  | -0,969688283 |
| A_21_P0009204 | BX648922          | XLOC_012583    |                                                         |                 |  | -0,970326904 |
| A_21_P0003683 | TCONS_00008340    | XLOC_003789    |                                                         |                 |  | -0,971962924 |
| A_21_P0008749 | TCONS_00023701    | XLOC_011506    |                                                         |                 |  | -0,972857339 |
| A_21_P0013260 | TCONS_I2_00026147 | XLOC_I2_013547 |                                                         |                 |  | -0,978222473 |
| A_21_P0000531 | NR_027309         | LOC148824      | uncharacterized LOC148824                               | ENST00000420469 |  | -0,981121346 |
| A_23_P91636   | NR_003714         | POM121L9P      | POM121 membrane glycoprotein-like 9, pseudogene         | ENST00000414583 |  | -0,981525732 |
| A_21_P0013064 | TCONS_I2_00024631 | XLOC_I2_012899 |                                                         |                 |  | -0,983229195 |
| A_21_P0005588 | TCONS_00014239    | XLOC_006316    |                                                         |                 |  | -0,985571008 |
| A_21_P0003008 | TCONS_00006154    | XLOC_002760    |                                                         |                 |  | -0,987003906 |
| A_21_P0011506 | NR_027078         | LOC283856      | uncharacterized LOC283856                               |                 |  | -0,989502249 |
| A_21_P0002006 | ENST00000414795   | XLOC_001966    |                                                         | ENST00000414795 |  | -0,989793011 |
| A_23_P107116  | NM_007148         | RNF112         | ring finger protein 112                                 |                 |  | -0,995246323 |
| A_32_P27917   | NM_015656         | KIF26A         | kinesin family member 26A                               | ENST00000315264 |  | -0,995634813 |
| A_21_P0001460 | NR_015440         | FLJ42875       | uncharacterized LOC440556                               | ENST00000445317 |  | -0,997616449 |
| A_21_P0003807 | TCONS_00008680    | XLOC_004196    |                                                         |                 |  | -0,998681239 |
| A_33_P3461258 | AY746436          | DEFA11P        | defensin, alpha 11 pseudogene                           |                 |  | -1,0005718   |
| A_21_P0007956 | ENST00000424165   | XLOC_010466    |                                                         | ENST00000424165 |  | -1,006227293 |
| A_23_P166566  | NM_024768         | CCDC48         | coiled-coil domain containing 48                        | ENST00000481536 |  | -1,008545788 |
| A_21_P0012810 | ENST00000510975   | XLOC_I2_011309 |                                                         | ENST00000510975 |  | -1,009666066 |
| A_21_P0002858 | ENST00000465347   | XLOC_003155    |                                                         | ENST00000465347 |  | -1,011471112 |
| A_21_P0013272 | TCONS_I2_00026231 | XLOC_I2_013621 |                                                         |                 |  | -1,012538737 |
| A_23_P107116  | NM_007148         | RNF112         | ring finger protein 112                                 |                 |  | -1,012896359 |
| A_21_P0008150 | THC2651391        | XLOC_010585    |                                                         |                 |  | -1,014858014 |
| A_21_P0011505 | BX537874          | LOC643802      | u3 small nucleolar ribonucleoprotein protein MPP10-like |                 |  | -1,016953168 |

|               |                  |                |                                                             |                 |              |
|---------------|------------------|----------------|-------------------------------------------------------------|-----------------|--------------|
| A_33_P3674029 | NR_026823        | FAM138D        | family with sequence similarity 138, member D               |                 | -1,019635872 |
| A_21_P0004184 | TCONS_00009797   | XLOC_005041    |                                                             |                 | -1,020446703 |
| A_23_P413862  | NM_020869        | DCDC5          | doublecortin domain containing 5                            | ENST00000303697 | -1,021637719 |
| A_21_P0013641 | TCONS_I2_0002931 | XLOC_I2_015201 |                                                             |                 | -1,026957017 |
| A_23_P104762  | NM_006106        | YAP1           | Yes-associated protein 1                                    | ENST00000531439 | -1,027529249 |
| A_21_P0010208 | ENST00000420273  | XLOC_014096    |                                                             | ENST00000420273 | -1,045365156 |
| A_21_P0006221 | TCONS_00016147   | XLOC_007543    |                                                             |                 | -1,045634266 |
| A_33_P3280561 | NM_001146182     | KRTAP16-1      | keratin associated protein 16-1                             | ENST00000391352 | -1,047965057 |
| A_21_P0012701 | THC2667912       | XLOC_I2_011411 |                                                             |                 | -1,052247827 |
| A_33_P3319791 | NM_002135        | NR4A1          | nuclear receptor subfamily 4, group A, member 1             | ENST00000545748 | -1,054464938 |
| A_33_P3362791 | XM_001719518     | LOC100128869   | uncharacterized LOC100128869                                |                 | -1,058736198 |
| A_23_P428485  | NM_030623        | SPHKAP         | SPHK1 interactor, AKAP domain containing                    | ENST00000344657 | -1,059150923 |
| A_23_P171409  | NR_001527        | TTY6           | testis-specific transcript, Y-linked 6 (non-protein coding) | ENST00000253848 | -1,082129    |
| A_21_P0008057 | TCONS_00021769   | XLOC_010364    |                                                             |                 | -1,087267799 |
| A_21_P0001874 | ENST00000450944  | XLOC_001513    |                                                             | ENST00000450944 | -1,096074256 |
| A_23_P79591   | NM_000384        | APOB           | apolipoprotein B (including Ag(x) antigen)                  | ENST00000233242 | -1,102908622 |
| A_21_P0004686 | NR_027030        | MGC34034       | uncharacterized protein MGC34034                            |                 | -1,105352074 |
| A_21_P0005077 | TCONS_00012345   | XLOC_005899    |                                                             |                 | -1,10920942  |
| A_23_P110462  | NM_013340        | PCDHB1         | protocadherin beta 1                                        | ENST00000306549 | -1,115446209 |
| A_21_P0000975 | ENST00000447150  | XLOC_000201    |                                                             | ENST00000447150 | -1,116156276 |
| A_23_P415470  | NM_032100        | PCDHGB6        | protocadherin gamma subfamily B, 6                          | ENST00000520790 | -1,124040046 |
| A_21_P0001662 | TCONS_00001931   | XLOC_000036    |                                                             |                 | -1,124121095 |
| A_24_P77968   | NM_001458        | FLNC           | filamin C, gamma                                            | ENST00000325888 | -1,138991486 |
| A_21_P0014610 | XR_110521        | LOC100506941   | uncharacterized LOC100506941                                |                 | -1,150782226 |
| A_33_P3336257 | NM_024337        | IRX1           | iroquois homeobox 1                                         | ENST00000302006 | -1,152589919 |
| A_21_P0010658 | NM_001195388     | FCRL5          | Fc receptor-like 5                                          | ENST00000368191 | -1,156565964 |
| A_21_P0012813 | ENST00000511346  | XLOC_I2_011361 |                                                             | ENST00000511346 | -1,161936109 |
| A_33_P3747204 | NR_040108        | LOC728175      | uncharacterized LOC728175                                   |                 | -1,164037334 |
| A_23_P123488  | NM_024504        | PRDM14         | PR domain containing 14                                     | ENST00000276594 | -1,183721717 |

|               |                 |                |                                                            |  |                 |              |
|---------------|-----------------|----------------|------------------------------------------------------------|--|-----------------|--------------|
| A_21_P0009215 | TCONS_00025293  | XLOC_012095    |                                                            |  |                 | -1,183745349 |
| A_23_P356163  | NM_178824       | WDR49          | WD repeat domain 49                                        |  | ENST00000308378 | -1,185850319 |
| A_21_P0014434 | XR_109768       | LOC100506901   | uncharacterized LOC100506901                               |  |                 | -1,204448402 |
| A_33_P3390170 | XM_001719518    | LOC100128869   | uncharacterized LOC100128869                               |  |                 | -1,222776809 |
| A_21_P0014143 | XR_108578       | LOC100506791   | uncharacterized LOC100506791                               |  | ENST00000504989 | -1,236091249 |
| A_21_P0009311 | TCONS_00025609  | XLOC_012441    |                                                            |  |                 | -1,241097417 |
| A_21_P0011798 | THC2688675      | XLOC_I2_007274 |                                                            |  |                 | -1,248760203 |
| A_21_P0012567 | THC2678769      | XLOC_I2_010555 |                                                            |  |                 | -1,253599237 |
| A_21_P0009689 | BX118437        | XLOC_012984    |                                                            |  |                 | -1,267211164 |
| A_21_P0002311 | TCONS_00003929  | XLOC_001741    |                                                            |  |                 | -1,267222931 |
| A_21_P0005687 | TCONS_00014674  | XLOC_006773    |                                                            |  |                 | -1,291469696 |
| A_33_P3323718 | NM_001008224    | UACA           | uveal autoantigen with coiled-coil domains and ankyrin rep |  | ENST00000379983 | -1,332741474 |
| A_33_P3383836 | NM_015163       | TRIM9          | tripartite motif containing 9                              |  | ENST00000555170 | -1,344367036 |
| A_21_P0003365 | ENST00000514413 | XLOC_003541    |                                                            |  | ENST00000514413 | -1,3807109   |
